# Supplementary material for: In-depth chiral sensing capability of C-dots in a biomimetic protein-based hydrogel: a probe for chiral recognition applications
Source: Royal Society of Chemistry journal article supplement (doi:10.1039/d5bm01508a), 2026-01-01
Supplement: d5bm01508a1.zip [file Figure 1.xlsx]

## Sheet: Figure 1 (c)
200	2.163	2.182	350	392.149	482.694
201	2.24	2.253	351	388.913	463.682
202	2.307	2.306	352	397.869	479.473
203	2.352	2.373	353	403.144	504.531
204	2.403	2.418	354	428.51	520.835
205	2.45	2.48	355	438.81	544.959
206	2.514	2.537	356	447.652	586.725
207	2.563	2.574	357	477.599	608.26
208	2.603	2.621	358	506.206	638.214
209	2.671	2.675	359	539.612	723.859
210	2.709	2.723	360	576.971	798.196
211	2.765	2.791	361	622.945	865.469
212	2.803	2.803	362	702.751	1038.77
213	2.856	2.851	363	807.329	1173.45
214	2.893	2.907	364	944.505	1350.86
215	2.953	2.965	365	1153.39	1684.41
216	2.988	2.997	366	1376.12	1988.64
217	3.008	3.034	367	1637.52	2370.79
218	3.05	3.074	368	2030.28	3019.83
219	3.067	3.103	369	2541.34	3770.09
220	3.04	3.141	370	3183.64	4647.81
221	3.025	3.163	371	4019.5	5926.62
222	2.971	3.165	372	5131.77	7477.6
223	2.882	3.159	373	6150.41	8965.46
224	2.789	3.139	374	7674.49	11278.4
225	2.677	3.102	375	9806.6	14138.8
226	2.565	3.028	376	12004.2	17055.1
227	2.45	2.957	377	14704.4	20728.2
228	2.351	2.876	378	18330.4	25434.6
229	2.255	2.792	379	21803.5	30323
230	2.164	2.704	380	26602.7	36532.8
231	2.079	2.612	381	32102.9	43695
232	2.001	2.527	382	37761.9	50849.4
233	1.934	2.451	383	44932.3	59947.2
234	1.875	2.376	384	53313.8	70448.5
235	1.819	2.305	385	61223.3	80597.3
236	1.773	2.245	386	71469.2	92986
237	1.723	2.175	387	83073.9	107495
238	1.676	2.109	388	94090.6	120448
239	1.634	2.05	389	107570	136285
240	1.591	1.987	390	123668	154884
241	1.55	1.93	391	138297	172599
242	1.512	1.872	392	155885	192531
243	1.475	1.818	393	175688	215618
244	1.435	1.763	394	194166	236865
245	1.399	1.71	395	215267	260751
246	1.36	1.656	396	238839	287124
247	1.322	1.602	397	260731	311680
248	1.28	1.545	398	288206	341568
249	1.234	1.486	399	317336	373967
250	1.188	1.428	400	342893	401653
251	1.141	1.37	401	371342	432590
252	1.092	1.309	402	403193	467341
253	1.045	1.25	403	429567	496027
254	0.997	1.192	404	460499	529324
255	0.95	1.135	405	496183	567880
256	0.903	1.079	406	527456	601301
257	0.855	1.023	407	559919	637677
258	0.807	0.967	408	597699	678201
259	0.757	0.908	409	628197	710898
260	0.709	0.852	410	660540	744407
261	0.661	0.795	411	696709	783802
262	0.616	0.74	412	727870	817813
263	0.573	0.689	413	760884	853498
264	0.534	0.642	414	797168	891830
265	0.499	0.6	415	827041	924536
266	0.467	0.562	416	858143	956889
267	0.44	0.528	417	890143	990858
268	0.416	0.498	418	915376	1.01899e+06
269	0.395	0.471	419	943239	1.04818e+06
270	0.378	0.448	420	974154	1.08036e+06
271	0.361	0.427	421	998487	1.10607e+06
272	0.347	0.409	422	1.02313e+06	1.13258e+06
273	0.335	0.393	423	1.04977e+06	1.16025e+06
274	0.323	0.379	424	1.06984e+06	1.1829e+06
275	0.312	0.366	425	1.09008e+06	1.20391e+06
276	0.303	0.354	426	1.11069e+06	1.22569e+06
277	0.294	0.343	427	1.12631e+06	1.24441e+06
278	0.286	0.332	428	1.14181e+06	1.26109e+06
279	0.279	0.323	429	1.15854e+06	1.27772e+06
280	0.272	0.315	430	1.1708e+06	1.29023e+06
281	0.266	0.308	431	1.18217e+06	1.30318e+06
282	0.261	0.301	432	1.19226e+06	1.31465e+06
283	0.256	0.295	433	1.20036e+06	1.32242e+06
284	0.251	0.289	434	1.20846e+06	1.32923e+06
285	0.247	0.284	435	1.21684e+06	1.33858e+06
286	0.243	0.28	436	1.22198e+06	1.34386e+06
287	0.24	0.277	437	1.22789e+06	1.34942e+06
288	0.237	0.273	438	1.23023e+06	1.35184e+06
289	0.235	0.271	439	1.23357e+06	1.35457e+06
290	0.234	0.27	440	1.23409e+06	1.35384e+06
291	0.233	0.268	441	1.2343e+06	1.3526e+06
292	0.232	0.267	442	1.23389e+06	1.35185e+06
293	0.233	0.268	443	1.23094e+06	1.34799e+06
294	0.233	0.269	444	1.22644e+06	1.34206e+06
295	0.234	0.27	445	1.22311e+06	1.33783e+06
296	0.236	0.272	446	1.21631e+06	1.33206e+06
297	0.238	0.274	447	1.21135e+06	1.32294e+06
298	0.24	0.276	448	1.20415e+06	1.31571e+06
299	0.242	0.279	449	1.19514e+06	1.30762e+06
300	0.245	0.283	450	1.18578e+06	1.29572e+06
301	0.249	0.287	451	1.17718e+06	1.28505e+06
302	0.253	0.292	452	1.16496e+06	1.27269e+06
303	0.257	0.297	453	1.15335e+06	1.25993e+06
304	0.262	0.303	454	1.14153e+06	1.24755e+06
305	0.268	0.309	455	1.12978e+06	1.23264e+06
306	0.275	0.317	456	1.11581e+06	1.21612e+06
307	0.283	0.325	457	1.10477e+06	1.20247e+06
308	0.29	0.334	458	1.08893e+06	1.18535e+06
309	0.297	0.342	459	1.07248e+06	1.16709e+06
310	0.306	0.35	460	1.05837e+06	1.15162e+06
311	0.314	0.36	461	1.04304e+06	1.13344e+06
312	0.324	0.371	462	1.0255e+06	1.11323e+06
313	0.333	0.381	463	1.01104e+06	1.09727e+06
314	0.344	0.393	464	993047	1.07924e+06
315	0.354	0.404	465	973226	1.05803e+06
316	0.365	0.416	466	957321	1.04043e+06
317	0.377	0.429	467	939187	1.02204e+06
318	0.39	0.442	468	920155	1.00083e+06
319	0.402	0.456	469	902710	982234
320	0.416	0.471	470	885278	962529
321	0.429	0.485	471	865821	942771
322	0.442	0.5	472	848243	924120
323	0.456	0.515	473	829564	903196
324	0.47	0.529	474	809620	880478
325	0.485	0.545	475	793761	862195
326	0.498	0.56	476	775060	841095
327	0.513	0.576	477	756486	821410
328	0.527	0.591	478	739886	803232
329	0.542	0.606	479	722223	784101
330	0.556	0.622	480	701863	761665
331	0.57	0.637	481	685876	743923
332	0.584	0.651	482	667557	726018
333	0.598	0.666	483	649244	704430
334	0.611	0.68	484	633988	687544
335	0.623	0.694	485	616005	668690
336	0.636	0.706	486	598396	649695
337	0.648	0.719	487	583986	633286
338	0.659	0.732	488	566730	615236
339	0.671	0.743	489	550452	597275
340	0.681	0.754	490	536539	581884
341	0.691	0.764	491	520145	564369
342	0.699	0.773	492	505770	547644
343	0.707	0.782	493	492347	534421
344	0.714	0.788	494	477724	517721
345	0.719	0.795	495	462871	502099
346	0.724	0.8	496	450045	488471
347	0.728	0.805	497	436843	473329
348	0.731	0.805	498	423753	458866
349	0.733	0.808	499	412763	447305
350	0.734	0.809	500	400219	433056
351	0.734	0.809	501	388306	420137
352	0.733	0.808	502	377702	409023
353	0.731	0.806	503	365843	395072
354	0.728	0.802	504	354895	384060
355	0.725	0.798	505	345002	373534
356	0.721	0.793	506	333793	361990
357	0.714	0.787	507	323990	350893
358	0.709	0.78	508	315722	341307
359	0.701	0.772	509	304929	330328
360	0.693	0.763	510	295173	319898
361	0.684	0.754	511	286977	310846
362	0.674	0.742	512	277476	301112
363	0.663	0.731	513	269230	291932
364	0.651	0.717	514	261016	283024
365	0.638	0.703	515	252872	273554
366	0.624	0.688	516	245282	266186
367	0.609	0.671	517	238545	257931
368	0.595	0.655	518	229930	249164
369	0.578	0.639	519	222993	241390
370	0.562	0.621	520	216144	234264
371	0.545	0.602	521	208666	226155
372	0.528	0.584	522	202338	219294
373	0.511	0.566	523	196857	213114
374	0.494	0.547	524	189534	205342
375	0.477	0.529	525	183364	199181
376	0.46	0.511	526	178184	193163
377	0.442	0.492	527	172197	185916
378	0.425	0.474	528	166874	180722
379	0.408	0.455	529	161372	174501
380	0.392	0.438	530	155886	168914
381	0.376	0.419	531	151758	163858
382	0.359	0.401	532	146872	159009
383	0.343	0.384	533	141721	153550
384	0.326	0.365	534	137527	148631
385	0.31	0.348	535	133298	144473
386	0.293	0.33	536	128473	139110
387	0.277	0.312	537	125150	135043
388	0.261	0.295	538	121022	131245
389	0.247	0.278	539	116925	126224
390	0.231	0.261	540	113297	122472
391	0.217	0.245	541	109490	118296
392	0.203	0.23	542	105646	114193
393	0.189	0.215	543	102449	110980
394	0.176	0.201	544	99206.4	107354
395	0.164	0.188	545	95699	104129
396	0.153	0.175	546	93120.1	101096
397	0.142	0.164	547	90107.1	97423.1
398	0.133	0.153	548	87084.6	94246.3
399	0.123	0.143	549	84044.6	91525.3
400	0.115	0.134	550	81354.5	87977.1
401	0.108	0.126	551	78732.5	85354.9
402	0.101	0.118	552	76532.6	82965.9
403	0.095	0.111	553	73941.3	80258.6
404	0.089	0.105	554	71239.5	77579.8
405	0.084	0.099	555	69228.7	74919.1
406	0.08	0.094	556	66970.7	72515.1
407	0.076	0.09	557	64745.8	70191.1
408	0.072	0.085	558	62774.6	68236.5
409	0.069	0.082	559	60621.6	65910.6
410	0.066	0.079	560	58778.2	63732.1
411	0.064	0.075	561	57127.2	61775.8
412	0.062	0.073	562	54734.9	59519.7
413	0.059	0.07	563	53052.4	57602.6
414	0.057	0.068	564	51187.6	55378
415	0.056	0.066	565	49483.8	53453.9
416	0.054	0.064	566	48105.6	52085.3
417	0.053	0.061	567	46729.2	50632.4
418	0.051	0.059	568	44862.1	48525.7
419	0.05	0.058	569	43439.1	47231.3
420	0.049	0.056	570	42294.9	45670.9
421	0.048	0.055	571	40889.6	44242.8
422	0.047	0.053	572	39645.4	42980.5
423	0.046	0.052	573	38367.5	41639.4
424	0.044	0.051	574	36976.7	40054.9
425	0.044	0.05	575	35864.8	38746
426	0.043	0.048	576	34561.5	37462.1
427	0.042	0.047	577	33493.4	36198.3
428	0.041	0.046	578	32594.8	35239.6
429	0.04	0.045	579	31412	34022
430	0.039	0.044	580	30420.4	32836.8
431	0.038	0.043	581	29689.5	31982.7
432	0.038	0.042	582	28470.4	31079
433	0.037	0.041	583	27572.1	29750
434	0.036	0.04	584	26718.4	29013.2
435	0.035	0.04	585	25939.2	27967.1
436	0.035	0.039	586	25014.9	27285.2
437	0.034	0.038	587	24395.3	26252.7
438	0.033	0.037	588	23546.1	25570.2
439	0.032	0.036	589	22709.8	24717.5
440	0.032	0.036	590	22054.5	23890.7
441	0.031	0.035	591	21361.3	23205.2
442	0.03	0.034	592	20574.9	22666.7
443	0.03	0.033	593	20064.1	21773.4
444	0.029	0.033	594	19393.3	20912.8
445	0.029	0.032	595	18872.9	20588.5
446	0.028	0.031	596	18280.1	19907.5
447	0.027	0.031	597	17723.1	19122.1
448	0.027	0.03	598	17175.8	18601.8
449	0.026	0.029	599	16633.1	17997.7
450	0.026	0.029	600	15997.7	17561.1
451	0.025	0.028	601	15554.2	16902.2
452	0.024	0.027	602	15030	16477.8
453	0.023	0.026	603	14619.4	15920.1
454	0.023	0.026	604	14197.1	15473.9
455	0.023	0.025	605	13911.6	14906.5
456	0.022	0.025	606	13440	14601.5
457	0.022	0.024	607	12945.8	14195.2
458	0.021	0.024	608	12623.2	13753.3
459	0.021	0.023	609	12148.3	13252.1
460	0.02	0.023	610	11922.7	12922.7
461	0.019	0.022	611	11445.5	12502.5
462	0.019	0.021	612	11191.3	12229
463	0.018	0.021	613	10907.1	11832.2
464	0.018	0.02	614	10507.1	11514.6
465	0.018	0.02	615	10322.6	11178.3
466	0.017	0.02	616	10077	10967
467	0.017	0.019	617	9775.86	10565.9
468	0.016	0.019	618	9525.56	10502.9
469	0.016	0.018	619	9299.63	10137
470	0.016	0.018	620	9023.63	9876.23
471	0.015	0.017	621	8848.44	9674.73
472	0.015	0.017	622	8600.85	9310.82
473	0.014	0.016	623	8336.44	9006.88
474	0.014	0.016	624	8149.19	8904.89
475	0.014	0.016	625	7975.44	8646.72
476	0.014	0.015	626	7682.31	8331.47
477	0.013	0.015	627	7390.65	8103.4
478	0.013	0.015	628	7259.88	7975.8
479	0.013	0.014	629	6976.45	7657.03
480	0.012	0.014	630	6904.74	7442.86
481	0.012	0.014	631	6620.38	7192.14
482	0.012	0.013	632	6441.06	7023.07
483	0.011	0.013	633	6332.69	6803.22
484	0.011	0.013	634	5999.15	6599.43
485	0.011	0.012	635	5933.07	6403.32
486	0.01	0.012	636	5695.85	6170.74
487	0.01	0.012	637	5556.65	6025.24
488	0.01	0.012	638	5361.27	5886.48
489	0.01	0.011	639	5230.52	5718.44
490	0.009	0.011	640	5049.7	5465.62
491	0.009	0.011	641	4897.3	5391.67
492	0.009	0.01	642	4783.26	5184.94
493	0.009	0.01	643	4620.7	5052.28
494	0.008	0.01	644	4470.02	4949.77
495	0.008	0.01	645	4465.76	4826.34
496	0.008	0.009	646	4253.46	4683.73
497	0.008	0.009	647	4135.33	4511.18
498	0.007	0.009	648	4086.36	4420.27
499	0.007	0.009	649	3960.92	4251.42
500	0.007	0.008	650	3821.84	4150.5
501	0.007	0.008	651	3754.32	4069.72
502	0.007	0.008	652	3584.77	3937.73
503	0.006	0.008	653	3475.75	3909.77
504	0.006	0.007	654	3424.07	3739.04
505	0.006	0.007	655	3379.1	3654.77
506	0.006	0.007	656	3243.03	3569.94
507	0.006	0.007	657	3143.66	3438.64
508	0.006	0.007	658	3057.21	3383.41
509	0.005	0.007	659	2974.04	3312.32
510	0.005	0.007	660	2886.3	3182.37
511	0.005	0.006
512	0.005	0.006
513	0.005	0.006
514	0.005	0.006
515	0.005	0.006
516	0.004	0.006
517	0.004	0.006
518	0.004	0.005
519	0.004	0.005
520	0.004	0.005
521	0.004	0.005
522	0.004	0.005
523	0.004	0.005
524	0.003	0.005
525	0.004	0.005
526	0.004	0.004
527	0.003	0.004
528	0.003	0.004
529	0.003	0.004
530	0.003	0.004
531	0.003	0.004
532	0.003	0.004
533	0.003	0.004
534	0.003	0.004
535	0.003	0.004
536	0.003	0.004
537	0.002	0.003
538	0.002	0.003
539	0.002	0.003
540	0.002	0.003
541	0.002	0.003
542	0.002	0.003
543	0.002	0.003
544	0.002	0.003
545	0.002	0.003
546	0.002	0.003
547	0.002	0.003
548	0.002	0.002
549	0.002	0.002
550	0.002	0.002
551	0.001	0.002
552	0.001	0.002
553	0.001	0.002
554	0.001	0.002
555	0.001	0.002
556	0.001	0.002
557	0.001	0.002
558	0.001	0.002
559	0.001	0.002
560	0.001	0.002
561	0.001	0.002
562	0.001	0.002
563	0.001	0.002
564	0.001	0.002
565	0.001	0.002
566	0.001	0.002
567	0.001	0.002
568	0.001	0.001
569	0.001	0.001
570	0.001	0.001
571	0.001	0.001
572	0.001	0.001
573	0.001	0.001
574	0.001	0.001
575	0.001	0.001
576	0.001	0.001
577	0.001	0.001
578	0.001	0.001
579	0.001	0.001
580	0.001	0.001
581	0	0.001
582	0	0.001
583	0	0.001
584	0.001	0.001
585	0	0.001
586	0	0.001
587	0	0.001
588	0	0.001
589	0	0.001
590	0	0.001
591	0	0.001
592	0	0.001
593	0	0.001
594	0	0.001
595	0	0.001
596	0	0.001
597	0	0.001
598	0	0.001
599	0	0.001
600	0	0.001
601	0	0.001
602	0	0.001
603	0	0.001
604	0	0.001
605	0	0.001
606	0	0.001
607	0	0.001
608	0	0.001
609	0	0.001
610	0	0.001
611	0	0.001
612	0	0.001
613	0	0.001
614	0	0.001
615	0	0.001
616	0	0.001
617	0	0.001
618	0	0.001
619	0	0.001
620	0	0.001
621	0	0.001
622	0	0.001
623	0	0.001
624	0	0.001
625	0	0.001
626	0	0.001
627	0	0
628	0	0.001
629	0	0
630	0	0.001
631	0	0.001
632	0	0.001
633	0	0.001
634	0	0.001
635	0	0
636	0	0.001
637	0	0
638	0	0
639	0	0
640	0	0
641	0	0
642	0	0
643	0	0
644	0	0
645	0	0
646	0	0
647	0	0
648	0	0
649	0	0
650	0	0.001
651	0	0
652	0	0
653	0	0.001
654	0	0
655	0	0
656	0	0
657	0	0
658	0	0
659	0	0
660	0	0
661	0	0
662	0	0
663	0	0
664	0	0
665	0	0
666	0	0
667	0	0
668	0	0
669	0	0
670	0	0
671	0	0
672	0	0
673	0	0
674	0	0
675	0	0
676	0	0
677	0	0
678	0	0
679	0	0
680	0	0
681	0	0
682	0	0
683	0	0
684	0	0
685	0	0
686	0	0
687	0	0
688	0	0
689	0	0
690	0	0
691	0	0
692	0	0
693	0	0
694	0	0
695	0	0
696	0	0
697	0	0
698	0	0
699	0	0
700	0	0
701	0	0
702	0	0
703	0	0
704	0	0
705	0	0
706	0	0
707	0	0
708	0	0
709	0	0
710	0	0
711	0	0
712	0	0
713	0	0
714	0	0
715	0	0
716	0	0
717	0	0
718	0	0
719	0	0
720	0	0
721	0	0
722	0	0
723	0	0
724	0	0
725	0	0
726	0	0
727	0	0
728	0	0
729	0	0
730	0	0
731	0	0
732	0	0
733	0	0
734	0	0
735	0	0
736	0	0
737	0	0
738	0	0
739	0	0
740	0	0
741	0	0
742	0	0
743	0	0
744	0	0
745	0	0
746	0	0
747	0	0
748	0	0
749	0	0
750	0	0
751	0	0
752	0	0
753	0	0
754	0	0
755	0	0
756	0	0
757	0	0
758	0	0
759	0	0
760	0	0
761	0	0
762	0	0.001
763	0	0
764	0	0
765	0	0
766	0	0
767	0	0
768	0	0
769	0	0
770	0	0
771	0	0
772	0	0
773	0	0
774	0	0
775	0	0
776	0	0
777	0	0
778	0	0
779	0	0
780	0	0
781	0	0
782	0	0
783	0	0
784	0	0
785	0	0
786	0	0
787	0	0
788	0	0
789	0	0
790	0	0
791	0	0
792	0	0
793	0	0
794	0	0
795	0	0
796	0	0
797	0	0
798	0	0
799	0	0
800	0	0

## Sheet: Figure 1(d)
-22.2454	0	0	0	0	0
-22.192	0	0	0	0	0
-22.1386	0	0	0	0	0
-22.0853	0	0	0	0	0
-22.0319	0	0	0	0	0
-21.9785	0	0	0	0	0
-21.9251	0	0	0	0	0
-21.8717	0	0	0	0	0
-21.8183	0	0	0	0	0
-21.7649	0	0	0	0	0
-21.7116	0	0	0	0	0
-21.6582	0	0	0	0	0
-21.6048	0	0	0	0	0
-21.5514	0	0	0	0	0
-21.498	0	0	0	0	0
-21.4446	0	0	0	0	0
-21.3912	0	0	0	0	0
-21.3378	0	0	0	0	0
-21.2845	0	0	0	0	0
-21.2311	0	0	0	0	0
-21.1777	0	0	0	0	0
-21.1243	0	0	0	0	0
-21.0709	0	0	0	0	0
-21.0175	0	0	0	0	0
-20.9641	0	0	0	0	0
-20.9108	0	0	0	0	0
-20.8574	0	0	0	0	0
-20.804	0	0	0	0	0
-20.7506	0	0	0	0	0
-20.6972	0	0	0	0	0
-20.6438	0	0	0	0	0
-20.5904	0	0	0	0	0
-20.5371	0	0	0	0	0
-20.4837	0	0	0	0	0
-20.4303	0	0	0	0	0
-20.3769	0	0	0	0	0
-20.3235	0	0	0	0	0
-20.2701	0	0	0	0	0
-20.2167	0	0	0	0	0
-20.1633	0	0	0	0	0
-20.11	0	0	0	0	0
-20.0566	0	0	0	0	0
-20.0032	0	0	0	0	0
-19.9498	0	0	0	0	0
-19.8964	0	0	0	0	0
-19.843	0	0	0	1	0
-19.7896	0	0	0	0	0
-19.7362	0	0	0	0	0
-19.6829	0	0	0	0	0
-19.6295	0	0	0	0	0
-19.5761	0	0	0	0	0
-19.5227	0	0	0	0	0
-19.4693	0	0	0	0	0
-19.4159	0	1	0	0	0
-19.3625	0	0	0	0	0
-19.3091	0	0	0	1	0
-19.2558	0	0	0	0	0
-19.2024	0	0	0	0	0
-19.149	0	0	0	0	0
-19.0956	0	0	0	0	0
-19.0422	0	0	0	0	0
-18.9888	0	0	0	0	0
-18.9354	0	0	0	0	0
-18.8821	0	0	0	0	0
-18.8287	0	0	0	0	0
-18.7753	0	0	0	0	0
-18.7219	0	0	0	0	0
-18.6685	0	0	0	0	0
-18.6151	0	0	0	0	0
-18.5617	0	0	0	0	0
-18.5084	0	0	0	0	0
-18.455	0	0	0	0	0
-18.4016	0	0	0	0	0
-18.3482	0	0	0	0	0
-18.2948	0	0	0	0	0
-18.2414	0	0	0	0	0
-18.188	0	0	0	0	0
-18.1347	0	0	0	0	0
-18.0813	0	0	0	0	0
-18.0279	0	0	0	0	0
-17.9745	0	0	0	0	0
-17.9211	0	0	0	0	0
-17.8677	0	0	0	0	0
-17.8143	0	0	0	0	0
-17.7609	0	0	0	0	0
-17.7076	0	0	0	0	0
-17.6542	0	0	0	0	0
-17.6008	0	0	0	1	0
-17.5474	0	0	0	0	0
-17.494	0	0	0	0	0
-17.4406	0	0	0	0	0
-17.3872	0	0	0	0	0
-17.3338	0	0	0	0	0
-17.2805	0	0	0	0	0
-17.2271	0	0	0	0	0
-17.1737	0	0	0	0	0
-17.1203	0	0	0	0	0
-17.0669	0	0	0	1	0
-17.0135	0	0	0	0	0
-16.9601	0	0	0	0	0
-16.9067	0	0	0	0	0
-16.8534	0	0	0	0	0
-16.8	0	0	0	0	0
-16.7466	0	0	0	0	0
-16.6932	0	0	0	0	0
-16.6398	0	0	0	0	0
-16.5864	0	0	0	0	0
-16.533	0	0	0	0	0
-16.4797	0	0	0	0	0
-16.4263	0	0	0	0	0
-16.3729	0	0	0	0	0
-16.3195	0	0	0	0	0
-16.2661	0	0	0	0	0
-16.2127	0	0	0	0	0
-16.1593	0	1	0	0	0
-16.1059	0	0	0	0	0
-16.0526	0	0	0	0	0
-15.9992	0	0	0	0	0
-15.9458	0	0	0	0	0
-15.8924	0	0	0	0	0
-15.839	0	0	0	0	0
-15.7856	0	0	0	0	0
-15.7322	0	0	0	0	0
-15.6789	0	0	0	0	0
-15.6255	0	0	0	0	0
-15.5721	0	0	0	0	0
-15.5187	0	0	0	0	0
-15.4653	0	0	0	0	0
-15.4119	0	0	0	0	0
-15.3585	0	0	0	0	0
-15.3051	0	0	0	0	0
-15.2518	0	0	0	0	0
-15.1984	0	0	0	0	0
-15.145	0	0	0	0	0
-15.0916	0	0	0	0	0
-15.0382	0	0	0	0	0
-14.9848	0	0	0	0	0
-14.9314	0	0	0	0	0
-14.8781	0	0	0	0	0
-14.8247	0	0	0	0	0
-14.7713	0	0	0	0	0
-14.7179	0	0	0	0	0
-14.6645	0	0	0	0	0
-14.6111	0	0	0	0	0
-14.5577	0	0	0	0	0
-14.5044	0	0	0	0	0
-14.451	0	0	0	0	0
-14.3976	0	2	0	0	0
-14.3442	0	0	0	0	0
-14.2908	0	0	0	0	0
-14.2374	0	0	0	0	0
-14.184	0	0	0	0	0
-14.1306	0	0	0	0	0
-14.0772	0	0	0	0	0
-14.0239	0	0	0	0	0
-13.9705	0	0	0	0	0
-13.9171	0	0	0	0	0
-13.8637	0	0	0	0	0
-13.8103	0	0	0	0	0
-13.7569	0	0	0	0	0
-13.7035	0	0	0	0	0
-13.6502	0	0	0	0	0
-13.5968	0	0	0	0	0
-13.5434	0	0	0	0	0
-13.49	0	0	0	0	0
-13.4366	0	0	0	0	0
-13.3832	0	0	0	0	0
-13.3298	0	0	0	0	0
-13.2765	0	0	0	0	0
-13.2231	0	0	0	0	0
-13.1697	0	0	0	0	0
-13.1163	0	0	0	0	0
-13.0629	0	0	0	0	0
-13.0095	0	0	0	0	0
-12.9561	0	0	0	0	0
-12.9027	0	0	0	0	0
-12.8494	0	0	0	0	0
-12.796	0	0	0	0	0
-12.7426	0	0	0	0	0
-12.6892	0	0	0	0	0
-12.6358	0	0	0	0	0
-12.5824	0	0	0	0	0
-12.529	0	0	0	0	0
-12.4756	0	0	0	0	0
-12.4223	0	0	0	0	0
-12.3689	0	1	0	0	0
-12.3155	0	0	0	0	0
-12.2621	0	0	0	0	0
-12.2087	0	0	0	0	0
-12.1553	0	0	0	0	0
-12.102	0	0	0	0	0
-12.0486	0	0	0	0	0
-11.9952	0	0	0	0	0
-11.9418	0	0	0	0	0
-11.8884	0	0	0	0	0
-11.835	0	0	0	0	0
-11.7816	0	0	0	1	0
-11.7282	0	0	0	0	0
-11.6748	0	0	0	0	0
-11.6215	0	0	0	0	0
-11.5681	0	0	0	0	0
-11.5147	0	0	0	0	0
-11.4613	0	0	0	0	0
-11.4079	0	0	0	0	0
-11.3545	0	0	0	0	0
-11.3011	0	0	0	0	0
-11.2478	0	0	0	0	0
-11.1944	0	0	0	0	0
-11.141	0	0	0	0	0
-11.0876	0	0	0	0	0
-11.0342	0	0	0	0	0
-10.9808	0	0	0	0	0
-10.9274	0	0	0	0	0
-10.8741	0	0	0	0	0
-10.8207	0	0	0	0	0
-10.7673	0	0	0	0	0
-10.7139	0	0	0	0	0
-10.6605	0	0	0	0	0
-10.6071	0	0	0	0	0
-10.5537	0	0	0	0	0
-10.5003	0	0	0	0	0
-10.447	0	0	0	0	0
-10.3936	0	0	0	0	0
-10.3402	0	0	0	0	0
-10.2868	0	0	0	0	0
-10.2334	0	0	0	0	0
-10.18	0	0	0	0	0
-10.1266	0	0	0	0	0
-10.0732	0	0	0	0	0
-10.0199	0	0	0	0	0
-9.96648	0	0	0	0	0
-9.91309	0	0	0	0	0
-9.8597	0	0	0	0	0
-9.80632	0	0	0	0	0
-9.75293	0	0	0	0	0
-9.69954	0	0	0	0	0
-9.64616	0	0	0	0	0
-9.59277	0	0	0	0	0
-9.53938	0	0	0	0	0
-9.486	0	0	0	0	0
-9.43261	0	0	0	0	0
-9.37922	0	0	0	0	0
-9.32584	0	0	0	0	0
-9.27245	0	0	0	0	0
-9.21906	0	0	0	0	0
-9.16568	0	0	0	1	0
-9.11229	0	0	0	0	0
-9.0589	0	1	0	0	0
-9.00552	0	0	0	0	0
-8.95213	0	0	0	1	0
-8.89874	0	0	0	1	0
-8.84536	0	0	0	0	0
-8.79197	0	0	0	0	0
-8.73858	0	0	0	0	0
-8.6852	0	0	0	0	0
-8.63181	0	0	0	0	0
-8.57842	0	0	0	0	0
-8.52504	0	0	0	0	0
-8.47165	0	0	0	0	0
-8.41826	0	0	0	0	0
-8.36488	0	0	0	0	0
-8.31149	0	0	0	0	0
-8.2581	0	0	0	0	0
-8.20472	0	0	0	0	0
-8.15133	0	0	0	0	0
-8.09794	0	0	0	0	0
-8.04456	0	0	0	0	0
-7.99117	0	0	0	0	0
-7.93778	0	0	0	0	0
-7.88439	0	0	0	0	0
-7.83101	0	0	0	0	0
-7.77762	0	0	0	0	0
-7.72423	0	0	0	0	0
-7.67085	0	0	0	0	0
-7.61746	0	0	0	0	0
-7.56407	0	0	0	0	0
-7.51069	0	0	0	0	0
-7.4573	0	0	0	0	0
-7.40391	0	0	0	0	0
-7.35053	0	0	0	0	0
-7.29714	0	0	0	0	0
-7.24375	0	0	0	0	0
-7.19037	0	0	0	0	0
-7.13698	0	0	0	0	0
-7.08359	0	0	0	0	0
-7.03021	0	0	0	0	0
-6.97682	0	0	0	0	0
-6.92343	0	0	0	0	0
-6.87005	0	0	0	0	0
-6.81666	0	0	0	0	0
-6.76327	0	0	0	0	0
-6.70989	0	0	0	0	0
-6.6565	0	0	0	0	0
-6.60311	0	0	0	0	0
-6.54973	0	0	0	0	0
-6.49634	0	0	0	0	0
-6.44295	0	0	0	0	0
-6.38957	0	0	0	0	0
-6.33618	0	0	0	0	0
-6.28279	0	0	0	0	0
-6.22941	0	0	0	0	0
-6.17602	0	0	0	0	0
-6.12263	0	0	0	0	0
-6.06925	0	0	0	1	0
-6.01586	0	0	0	0	0
-5.96247	0	0	0	0	0
-5.90909	0	0	0	0	0
-5.8557	0	0	0	0	0
-5.80231	0	0	0	0	0
-5.74893	0	0	0	0	0
-5.69554	0	0	0	0	0
-5.64215	0	0	0	0	0
-5.58877	0	0	0	0	0
-5.53538	0	0	0	0	0
-5.48199	0	0	0	0	0
-5.42861	0	0	0	0	0
-5.37522	0	0	0	0	0
-5.32183	0	0	0	0	0
-5.26845	0	0	0	0	0
-5.21506	0	0	0	0	0
-5.16167	0	0	0	1	0
-5.10829	0	0	0	0	0
-5.0549	0	0	0	0	0
-5.00151	0	0	0	0	0
-4.94813	0	0	0	0	0
-4.89474	0	0	0	0	0
-4.84135	0	0	0	0	0
-4.78796	0	0	0	0	0
-4.73458	0	0	0	0	0
-4.68119	0	0	0	0	0
-4.6278	0	0	0	0	0
-4.57442	0	0	0	0	0
-4.52103	0	0	0	0	0
-4.46764	0	0	0	0	0
-4.41426	0	0	0	0	0
-4.36087	0	0	0	0	0
-4.30748	0	0	0	0	0
-4.2541	0	0	0	0	0
-4.20071	0	0	0	0	0
-4.14732	0	0	0	0	0
-4.09394	0	0	0	0	0
-4.04055	0	0	0	0	0
-3.98716	0	0	0	0	0
-3.93378	0	0	0	0	0
-3.88039	0	0	0	0	0
-3.827	0	0	0	0	0
-3.77362	0	0	0	0	0
-3.72023	0	0	0	0	0
-3.66684	0	0	0	0	0
-3.61346	0	0	0	0	0
-3.56007	0	0	0	0	0
-3.50668	0	0	0	0	0
-3.4533	0	0	0	0	0
-3.39991	0	0	0	0	0
-3.34652	0	0	0	0	0
-3.29314	0	1	0	0	0
-3.23975	0	0	0	0	0
-3.18636	0	0	0	0	0
-3.13298	0	0	0	0	0
-3.07959	0	0	0	0	0
-3.0262	0	0	0	0	0
-2.97282	0	1	0	0	0
-2.91943	0	0	0	0	0
-2.86604	0	0	0	1	0
-2.81266	0	0	0	0	0
-2.75927	0	0	0	0	0
-2.70588	0	0	0	0	0
-2.6525	0	0	0	0	0
-2.59911	0	0	0	0	0
-2.54572	0	0	0	0	0
-2.49234	0	0	0	0	0
-2.43895	0	0	0	0	0
-2.38556	0	0	0	0	0
-2.33218	0	0	0	0	0
-2.27879	0	0	0	0	0
-2.2254	0	0	0	0	0
-2.17202	1	0	0	0	0
-2.11863	0	0	0	0	0
-2.06524	0	0	0	0	0
-2.01186	0	0	0	0	0
-1.95847	0	0	0	0	0
-1.90508	0	0	0	0	0
-1.8517	0	0	-0.65671	1	0
-1.79831	0	0	-0.65671	0	0
-1.74492	0	0	-0.65671	0	0
-1.69154	0	0	-0.65671	0	0
-1.63815	0	0	-0.65671	0	0
-1.58476	0	0	-0.65671	1	0
-1.53137	0	0	-0.65671	0	0
-1.47799	0	0	-0.65671	0	0
-1.4246	0	0	-0.65671	0	0
-1.37121	0	0	-0.65671	0	0
-1.31783	0	0	-0.65671	0	0
-1.26444	0	0	-0.65671	0	0
-1.21105	0	0	-0.65671	0	-0.66494
-1.15767	0	0	-0.65671	0	-0.66494
-1.10428	0	0	-0.65671	0	-0.66494
-1.05089	0	0	-0.65671	0	-0.66494
-0.99751	0	0	-0.65671	0	-0.66494
-0.94412	0	0	-0.65671	0	-0.66494
-0.89073	0	0	-0.65671	0	-0.66494
-0.83735	0	0	-0.65671	0	-0.66494
-0.78396	0	0	-0.65671	0	-0.66494
-0.73057	0	0	-0.65671	0	-0.66494
-0.67719	0	0	-0.65671	0	-0.66494
-0.6238	0	0	-0.65671	0	-0.66494
-0.57041	0	1	-0.65671	0	-0.66494
-0.51703	0	0	-0.65049	1	-0.66494
-0.46364	1	0	-0.59294	0	-0.62853
-0.41025	1	0	-0.54302	0	-0.57419
-0.35687	0	0	-0.52712	0	-0.55718
-0.30348	3	0	-0.34456	1	-0.44974
-0.25009	5	3	0.06089	1	-0.21558
-0.19671	25	1	1.56732	3	0.78004
-0.14332	38	3	4.01102	1	2.6032
-0.08993	87	7	9.36734	6	6.4211
-0.03655	159	18	19.2172	15	13.7058
0.01684	306	33	37.5161	18	27.5574
0.07023	485	69	66.2356	48	50.4231
0.12361	748	107	109.694	74	85.8071
0.177	1048	151	169.569	137	136.411
0.23039	1365	257	247.623	198	203.298
0.28377	1882	360	354.181	308	293.811
0.33716	2465	464	491.748	392	413.693
0.39055	3004	673	658.176	539	562.107
0.44393	3667	855	859.926	731	742.323
0.49732	4433	1036	1101.7	975	959.92
0.55071	5214	1388	1382.38	1221	1216.8
0.60409	5819	1743	1692.21	1484	1506.28
0.65748	6425	2083	2031.5	1870	1824.68
0.71087	7145	2343	2405.1	2214	2175.82
0.76425	7768	2782	2806.56	2552	2557.87
0.81764	8246	3281	3228.89	2946	2963.39
0.87103	8852	3820	3677.9	3464	3394.12
0.92441	9362	4144	4147.44	3895	3848.69
0.9778	9727	4632	4628.1	4288	4319.81
1.03119	9800	5122	5105.52	4849	4794.07
1.08457	9968	5551	5583.63	5319	5269.64
1.13796	9912	6144	6052.11	5741	5740.3
1.19135	10000	6619	6517.58	6200	6207.39
1.24473	9872	7013	6969.05	6777	6665.96
1.29812	9712	7357	7404.2	7176	7111.12
1.35151	9347	7879	7813.06	7412	7535.19
1.40489	8977	8060	8194.86	7901	7934.67
1.45828	8392	8582	8540.7	8403	8302.17
1.51167	8029	8962	8860.19	8560	8642.41
1.56505	7215	9056	9131.27	8836	8943.63
1.61844	6478	9325	9359.06	9164	9200.96
1.67183	5737	9497	9544.08	9475	9416.47
1.72522	4949	9474	9685.5	9583	9589.06
1.7786	4270	9825	9789.97	9769	9722.54
1.83199	3608	9718	9859.54	9717	9820.16
1.88538	3023	9952	9898.8	9881	9885.56
1.93876	2443	9775	9908.39	9950	9920.8
1.99215	1847	10000	9889.2	9794	9925.8
2.04554	1456	9908	9851.95	10000	9908.1
2.09892	1030	9673	9795.91	9878	9870.48
2.15231	757	9702	9729.86	9858	9818.05
2.2057	607	9626	9660.16	9699	9758.23
2.25908	479	9492	9588.11	9490	9694.07
2.31247	412	9511	9516.74	9615	9628.11
2.36586	368	9459	9446.73	9580	9562.2
2.41924	294	9271	9376.78	9608	9495.55
2.47263	305	9487	9310.53	9547	9430.55
2.52602	240	9188	9244.13	9215	9365.87
2.5794	234	9315	9180.49	9305	9302.12
2.63279	239	9101	9119.58	9154	9240.66
2.68618	192	9116	9058.86	9104	9179.66
2.73956	204	9051	9000.94	9056	9120.2
2.79295	175	8965	8943.51	9102	9061.77
2.84634	145	8995	8886.52	8993	9003.45
2.89972	140	8755	8831.16	8912	8946.07
2.95311	141	8944	8777.42	9000	8890.21
3.0065	114	8747	8723.82	8810	8834.87
3.05988	102	8784	8671.05	8829	8780
3.11327	93	8587	8619.13	8696	8725.92
3.16666	79	8587	8567.69	8763	8672.43
3.22004	62	8501	8516.59	8836	8619.28
3.27343	61	8361	8466.51	8347	8566.92
3.32682	49	8548	8416.92	8553	8515.19
3.3802	54	8229	8368.62	8451	8464.46
3.43359	59	8192	8321.34	8456	8414.98
3.48698	34	8295	8273.6	8345	8365.61
3.54036	28	8441	8226.38	8290	8316.43
3.59375	28	8118	8179.83	8248	8267.99
3.64714	11	8058	8133.25	8141	8219.74
3.70052	28	8156	8088.2	8357	8172.56
3.75391	21	8045	8043.36	8143	8126.17
3.8073	11	8131	7998.63	8145	8079.97
3.86068	13	8051	7954.61	8013	8034.33
3.91407	15	7944	7911.23	8085	7989.42
3.96746	15	7937	7868.34	8009	7945.16
4.02084	9	7860	7825.64	7938	7901.25
4.07423	12	7739	7783.56	8080	7857.89
4.12762	11	7756	7741.86	7964	7815.07
4.181	10	7894	7700.51	7703	7772.69
4.23439	5	7800	7659.31	7776	7730.6
4.28778	7	7666	7618.59	7599	7688.95
4.34116	3	7475	7578.07	7796	7647.64
4.39455	8	7415	7538.16	7660	7606.86
4.44794	6	7580	7498.52	7606	7566.52
4.50132	12	7346	7459.48	7422	7526.76
4.55471	4	7479	7420.37	7590	7487.19
4.6081	10	7201	7381.84	7483	7448.06
4.66148	2	7214	7343.21	7389	7409.1
4.71487	4	7304	7304.98	7375	7370.42
4.76826	6	7218	7267.13	7227	7332.18
4.82164	3	7194	7229.42	7190	7294.18
4.87503	6	7291	7192.14	7188	7256.56
4.92842	7	7048	7155.16	7220	7219.34
4.98181	4	7071	7118.3	7254	7182.31
5.03519	8	7127	7081.87	7142	7145.67
5.08858	4	6884	7045.47	7142	7109.23
5.14197	2	7183	7009.24	7076	7072.91
5.19535	7	6954	6973.49	7061	7037.01
5.24874	5	6798	6937.85	6983	7001.39
5.30213	1	6945	6902.24	6946	6965.84
5.35551	3	6862	6866.95	6860	6930.54
5.4089	2	6872	6831.87	6896	6895.49
5.46229	6	6956	6797.2	6879	6860.8
5.51567	4	6925	6762.66	6784	6826.35
5.56906	8	6734	6728.51	6866	6792.23
5.62245	4	6626	6694.38	6627	6758.27
5.67583	6	6541	6660.56	6746	6724.52
5.72922	6	6562	6626.92	6695	6691.03
5.78261	4	6606	6593.39	6625	6657.68
5.83599	4	6776	6560.04	6504	6624.5
5.88938	2	6577	6526.8	6653	6591.45
5.94277	4	6426	6493.86	6598	6558.65
5.99615	5	6473	6461.18	6403	6526.12
6.04954	5	6347	6428.71	6568	6493.81
6.10293	10	6454	6396.65	6536	6461.87
6.15631	4	6338	6364.48	6493	6430
6.2097	6	6288	6332.6	6403	6398.28
6.26309	6	6218	6300.88	6256	6366.78
6.31647	3	6207	6269.19	6341	6335.36
6.36986	3	6303	6237.66	6195	6304.07
6.42325	0	6222	6206.18	6337	6272.85
6.47663	3	6115	6175.05	6165	6241.87
6.53002	4	6059	6144.13	6285	6211.16
6.58341	1	6136	6113.23	6225	6180.54
6.63679	1	6256	6082.51	6127	6150.03
6.69018	1	6048	6052	5964	6119.71
6.74357	5	6136	6021.85	6114	6089.7
6.79695	3	5940	5991.79	5973	6059.86
6.85034	7	6021	5962.1	6077	6030.3
6.90373	5	5963	5932.45	6080	6000.91
6.95711	2	5885	5902.8	6000	5971.53
7.0105	1	5870	5873.26	5863	5942.23
7.06389	0	5871	5843.87	6003	5913.03
7.11727	3	5737	5814.8	5893	5884.09
7.17066	5	5785	5785.98	5976	5855.44
7.22405	1	5756	5757.12	5842	5826.84
7.27743	3	5824	5728.52	5648	5798.39
7.33082	1	5621	5699.98	5749	5770.07
7.38421	2	5724	5671.66	5740	5741.9
7.43759	4	5586	5643.59	5750	5713.98
7.49098	1	5612	5615.53	5642	5686.13
7.54437	3	5648	5587.72	5692	5658.46
7.59775	1	5621	5559.97	5579	5630.9
7.65114	2	5450	5532.43	5572	5603.5
7.70453	3	5472	5505.09	5534	5576.29
7.75791	2	5579	5477.86	5542	5549.22
7.8113	4	5408	5450.87	5459	5522.34
7.86469	1	5374	5423.86	5479	5495.54
7.91807	0	5420	5396.96	5548	5468.8
7.97146	1	5379	5370.29	5524	5442.21
8.02485	6	5271	5344	5415	5415.97
8.07823	1	5269	5317.6	5482	5389.78
8.13162	2	5241	5291.39	5516	5363.68
8.18501	1	5219	5265.27	5316	5337.69
8.2384	1	5057	5239.3	5349	5311.83
8.29178	2	5195	5213.54	5244	5286.14
8.34517	3	5150	5187.95	5303	5260.65
8.39856	1	5126	5162.41	5094	5235.24
8.45194	2	5157	5137.08	5133	5209.96
8.50533	4	5069	5111.97	5120	5184.91
8.55872	3	5147	5086.95	5191	5159.99
8.6121	2	5017	5062.04	5119	5135.15
8.66549	7	4948	5037.49	5172	5110.6
8.71888	1	4958	5012.76	5129	5086.06
8.77226	2	4985	4988.24	5088	5061.57
8.82565	4	4929	4963.94	4958	5037.31
8.87904	3	4956	4939.73	5012	5013.17
8.93242	3	4897	4915.64	4959	4989.14
8.98581	2	4996	4891.63	4921	4965.2
9.0392	3	4854	4867.81	4993	4941.4
9.09258	3	4782	4844.1	4965	4917.75
9.14597	0	4865	4820.38	4831	4894.11
9.19936	3	4804	4796.95	4860	4870.66
9.25274	4	4708	4773.69	4966	4847.41
9.30613	2	4717	4750.45	4760	4824.24
9.35952	2	4824	4727.33	4685	4801.15
9.4129	1	4613	4704.29	4603	4778.15
9.46629	2	4699	4681.43	4748	4755.28
9.51968	2	4659	4658.68	4687	4732.55
9.57306	1	4724	4636.01	4667	4709.91
9.62645	1	4538	4613.45	4646	4687.37
9.67984	0	4635	4590.99	4734	4664.91
9.73322	3	4658	4568.79	4653	4642.66
9.78661	2	4505	4546.66	4602	4620.54
9.84	1	4555	4524.59	4594	4598.49
9.89338	2	4479	4502.7	4519	4576.56
9.94677	2	4414	4480.94	4549	4554.78
10.0002	3	4469	4459.33	4541	4533.14
10.0535	1	4368	4437.72	4613	4511.56
10.1069	0	4437	4416.19	4438	4490.01
10.1603	1	4332	4394.82	4415	4468.6
10.2137	1	4401	4373.58	4578	4447.32
10.2671	2	4326	4352.5	4339	4426.19
10.3205	1	4345	4331.48	4335	4405.15
10.3739	3	4313	4310.68	4442	4384.27
10.4273	2	4350	4289.94	4336	4363.51
10.4806	2	4295	4269.31	4218	4342.83
10.534	3	4289	4248.83	4282	4322.29
10.5874	1	4223	4228.36	4363	4301.8
10.6408	2	4124	4208.06	4309	4281.43
10.6942	3	4108	4187.9	4242	4261.21
10.7476	0	4205	4167.7	4268	4241
10.801	1	4174	4147.67	4240	4220.88
10.8543	3	4140	4127.84	4241	4200.96
10.9077	2	4105	4108.06	4128	4181.13
10.9611	0	4100	4088.28	4223	4161.32
11.0145	1	4106	4068.66	4123	4141.62
11.0679	1	3999	4049.15	4223	4122.03
11.1213	2	4119	4029.8	4327	4102.58
11.1747	3	3918	4010.59	4105	4083.28
11.228	0	3972	3991.32	3968	4064
11.2814	1	3963	3972.22	4010	4044.79
11.3348	1	3886	3953.2	4075	4025.7
11.3882	0	4018	3934.24	4031	4006.67
11.4416	0	3922	3915.39	4043	3987.72
11.495	2	3929	3896.75	3911	3968.95
11.5484	3	3925	3878.25	4023	3950.34
11.6018	1	3892	3859.74	3884	3931.77
11.6552	2	3900	3841.38	3837	3913.3
11.7085	2	3788	3823.12	3904	3894.94
11.7619	2	3889	3804.95	3918	3876.67
11.8153	1	3801	3786.82	3830	3858.46
11.8687	0	3762	3768.73	3804	3840.29
11.9221	1	3761	3750.79	3876	3822.23
11.9755	1	3650	3732.95	3747	3804.28
12.0289	1	3764	3715.2	3841	3786.43
12.0822	1	3677	3697.54	3795	3768.66
12.1356	0	3703	3679.93	3812	3750.95
12.189	2	3652	3662.5	3764	3733.38
12.2424	0	3695	3645.07	3660	3715.87
12.2958	1	3697	3627.79	3765	3698.44
12.3492	2	3532	3610.63	3801	3681.16
12.4026	0	3502	3593.47	3657	3663.91
12.4559	1	3600	3576.46	3659	3646.75
12.5093	2	3578	3559.58	3649	3629.73
12.5627	2	3521	3542.79	3569	3612.82
12.6161	1	3424	3526.03	3579	3595.96
12.6695	2	3639	3509.43	3576	3579.19
12.7229	3	3494	3492.93	3502	3562.57
12.7763	0	3465	3476.38	3551	3545.94
12.8297	1	3341	3459.97	3573	3529.38
12.883	2	3453	3443.68	3491	3512.95
12.9364	0	3452	3427.4	3473	3496.55
12.9898	4	3341	3411.39	3516	3480.35
13.0432	1	3392	3395.3	3483	3464.19
13.0966	0	3379	3379.25	3468	3448.02
13.15	1	3252	3363.33	3483	3431.95
13.2034	1	3423	3347.49	3389	3415.97
13.2568	0	3279	3331.69	3354	3400.05
13.3101	1	3409	3316.02	3312	3384.22
13.3635	2	3242	3300.48	3384	3368.53
13.4169	0	3328	3284.92	3425	3352.86
13.4703	1	3225	3269.48	3251	3337.27
13.5237	0	3258	3254.08	3258	3321.74
13.5771	0	3282	3238.75	3331	3306.27
13.6304	0	3264	3223.5	3359	3290.87
13.6838	0	3121	3208.34	3132	3275.56
13.7372	1	3154	3193.3	3319	3260.36
13.7906	0	3222	3178.3	3256	3245.22
13.844	2	3157	3163.47	3272	3230.21
13.8974	0	3187	3148.6	3100	3215.23
13.9508	0	3122	3133.82	3198	3200.3
14.0042	0	3057	3119.12	3165	3185.44
14.0576	2	3082	3104.59	3261	3170.73
14.1109	0	3124	3090.03	3084	3156.05
14.1643	0	3145	3075.56	3245	3141.41
14.2177	2	3078	3061.25	3114	3126.92
14.2711	0	3126	3046.91	3187	3112.47
14.3245	0	3058	3032.64	3182	3098.05
14.3779	0	3006	3018.45	3002	3083.7
14.4313	0	2924	3004.33	3071	3069.42
14.4846	1	2899	2990.35	3055	3055.25
14.538	2	3018	2976.47	2952	3041.21
14.5914	0	2938	2962.57	3027	3027.18
14.6448	1	2876	2948.79	3012	3013.22
14.6982	2	3003	2935.12	3033	2999.38
14.7516	0	2911	2921.42	2839	2985.56
14.805	0	3048	2907.8	2946	2971.77
14.8583	1	2873	2894.29	2948	2958.08
14.9117	1	2749	2880.85	3078	2944.49
14.9651	1	2826	2867.48	2954	2930.95
15.0185	1	2911	2854.18	2886	2917.49
15.0719	1	2860	2840.94	2940	2904.09
15.1253	0	2920	2827.72	2810	2890.72
15.1787	2	2816	2814.67	2920	2877.47
15.2321	0	2825	2801.57	2824	2864.25
15.2854	0	2786	2788.56	2865	2851.06
15.3388	2	2691	2775.71	2767	2838.01
15.3922	2	2810	2762.92	2874	2825.06
15.4456	1	2771	2750.13	2767	2812.13
15.499	0	2699	2737.36	2761	2799.22
15.5524	0	2687	2724.66	2762	2786.35
15.6058	1	2748	2712.07	2630	2773.58
15.6592	1	2706	2699.54	2749	2760.89
15.7125	0	2757	2687.03	2703	2748.22
15.7659	1	2658	2674.64	2717	2735.64
15.8193	2	2725	2662.35	2749	2723.17
15.8727	0	2623	2650.02	2744	2710.71
15.9261	1	2569	2637.8	2686	2698.31
15.9795	0	2688	2625.61	2707	2685.96
16.0329	3	2589	2613.61	2737	2673.75
16.0862	0	2685	2601.53	2771	2661.55
16.1396	1	2703	2589.55	2604	2649.39
16.193	0	2627	2577.58	2637	2637.28
16.2464	1	2624	2565.73	2615	2625.24
16.2998	1	2561	2553.93	2575	2613.28
16.3532	0	2547	2542.14	2558	2601.34
16.4066	0	2551	2530.4	2673	2589.43
16.4599	0	2436	2518.73	2614	2577.59
16.5133	0	2495	2507.11	2494	2565.81
16.5667	0	2560	2495.56	2624	2554.08
16.6201	1	2472	2484.12	2556	2542.45
16.6735	2	2564	2472.78	2562	2530.93
16.7269	0	2434	2461.4	2584	2519.42
16.7803	1	2481	2450.12	2512	2507.95
16.8337	0	2472	2438.85	2532	2496.53
16.887	2	2376	2427.73	2403	2485.21
16.9404	0	2455	2416.57	2471	2473.92
16.9938	1	2370	2405.51	2472	2462.67
17.0472	0	2362	2394.45	2442	2451.47
17.1006	0	2448	2383.46	2465	2440.3
17.154	1	2273	2372.57	2371	2429.22
17.2074	1	2327	2361.73	2413	2418.22
17.2608	0	2417	2350.9	2473	2407.23
17.3141	2	2385	2340.22	2294	2396.34
17.3675	1	2298	2329.53	2350	2385.52
17.4209	0	2204	2318.85	2356	2374.69
17.4743	0	2285	2308.22	2370	2363.89
17.5277	0	2220	2297.64	2318	2353.14
17.5811	0	2225	2287.13	2350	2342.45
17.6345	2	2257	2276.76	2339	2331.88
17.6878	1	2297	2266.39	2394	2321.37
17.7412	0	2224	2256.03	2278	2310.85
17.7946	2	2227	2245.81	2286	2300.43
17.848	0	2218	2235.54	2286	2290.03
17.9014	1	2251	2225.37	2381	2279.68
17.9548	1	2273	2215.25	2317	2269.39
18.0082	0	2207	2205.13	2267	2259.12
18.0616	1	2233	2195.11	2261	2248.92
18.1149	0	2265	2185.09	2193	2238.75
18.1683	1	2203	2175.16	2242	2228.65
18.2217	0	2195	2165.24	2285	2218.57
18.2751	0	2216	2155.36	2258	2208.53
18.3285	1	2150	2145.58	2228	2198.57
18.3819	0	2134	2135.81	2127	2188.64
18.4353	1	2041	2126.12	2142	2178.78
18.4886	0	2113	2116.44	2125	2168.94
18.542	1	2027	2106.85	2166	2159.18
18.5954	0	2124	2097.26	2166	2149.44
18.6488	1	2058	2087.76	2154	2139.76
18.7022	0	2055	2078.27	2171	2130.12
18.7556	1	2025	2068.86	2080	2120.53
18.809	0	2030	2059.46	2124	2110.98
18.8623	1	2023	2050.15	2081	2101.49
18.9157	0	2039	2040.83	2089	2092.03
18.9691	0	1980	2031.56	2046	2082.59
19.0225	2	1972	2022.44	2032	2073.27
19.0759	1	1937	2013.31	2014	2064
19.1293	0	1985	2004.17	2160	2054.71
19.1827	1	2008	1995.13	2042	2045.49
19.2361	0	2045	1986.07	2007	2036.3
19.2894	0	2015	1977.06	1985	2027.12
19.3428	0	1996	1968.1	2003	2018
19.3962	1	1999	1959.23	2029	2008.95
19.4496	0	1986	1950.35	1946	1999.93
19.503	0	1960	1941.51	1856	1990.93
19.5564	0	1936	1932.72	1947	1981.98
19.6098	1	1908	1924.03	1983	1973.11
19.6632	1	1888	1915.38	1894	1964.29
19.7165	1	1909	1906.77	1957	1955.52
19.7699	2	1855	1898.24	1923	1946.83
19.8233	0	1931	1889.65	1940	1938.12
19.8767	0	1861	1881.11	1924	1929.42
19.9301	0	1941	1872.6	1927	1920.75
19.9835	0	2002	1864.14	1852	1912.13
20.0369	1	1846	1855.77	1944	1903.59
20.0903	0	1861	1847.39	1843	1895.07
20.1436	0	1756	1839.05	1889	1886.57
20.197	0	1862	1830.74	1921	1878.11
20.2504	0	1850	1822.49	1804	1869.7
20.3038	1	1805	1814.32	1859	1861.35
20.3572	0	1805	1806.13	1934	1853.03
20.4106	0	1811	1797.99	1893	1844.74
20.464	1	1790	1789.94	1785	1836.51
20.5173	0	1805	1781.88	1878	1828.31
20.5707	1	1698	1773.9	1842	1820.17
20.6241	0	1702	1765.91	1814	1812.04
20.6775	0	1753	1757.96	1825	1803.94
20.7309	0	1820	1750.04	1810	1795.87
20.7843	0	1799	1742.17	1781	1787.84
20.8377	1	1726	1734.38	1785	1779.89
20.891	0	1732	1726.58	1755	1771.95
20.9444	0	1800	1718.82	1771	1764.04
20.9978	0	1702	1711.09	1756	1756.16
21.0512	0	1711	1703.4	1723	1748.32
21.1046	0	1668	1695.74	1788	1740.51
21.158	0	1670	1688.13	1651	1732.75
21.2114	0	1714	1680.55	1747	1725.02
21.2648	0	1692	1673	1732	1717.32
21.3181	0	1701	1665.49	1742	1709.66
21.3715	0	1670	1658.03	1737	1702.04
21.4249	1	1707	1650.64	1686	1694.49
21.4783	0	1638	1643.24	1639	1686.96
21.5317	0	1690	1635.87	1699	1679.45
21.5851	0	1695	1628.54	1667	1671.97
21.6385	1	1682	1621.3	1663	1664.56
21.6918	1	1608	1614.09	1763	1657.2
21.7452	1	1574	1606.93	1605	1649.88
21.7986	3	1595	1599.89	1645	1642.67
21.852	0	1651	1592.72	1646	1635.41
21.9054	1	1588	1585.64	1644	1628.17
21.9588	0	1517	1578.54	1618	1620.95
22.0122	0	1570	1571.48	1664	1613.74
22.0656	1	1509	1564.5	1602	1606.6
22.1189	0	1593	1557.5	1546	1599.48
22.1723	0	1536	1550.54	1611	1592.37
22.2257	1	1572	1543.65	1598	1585.33
22.2791	0	1559	1536.75	1606	1578.31
22.3325	0	1561	1529.88	1590	1571.3
22.3859	0	1553	1523.05	1603	1564.32
22.4393	0	1567	1516.25	1626	1557.38
22.4927	1	1508	1509.53	1596	1550.5
22.546	0	1497	1502.79	1561	1543.64
22.5994	1	1554	1496.14	1540	1536.83
22.6528	0	1380	1489.46	1551	1530.03
22.7062	1	1514	1482.88	1548	1523.29
22.7596	1	1501	1476.31	1501	1516.59
22.813	0	1462	1469.72	1533	1509.88
22.8664	0	1475	1463.18	1493	1503.19
22.9197	2	1420	1456.76	1530	1496.61
22.9731	0	1446	1450.27	1521	1490.01
23.0265	0	1409	1443.8	1443	1483.41
23.0799	0	1474	1437.37	1456	1476.85
23.1333	1	1461	1431.02	1498	1470.34
23.1867	0	1375	1424.65	1468	1463.86
23.2401	0	1385	1418.3	1462	1457.38
23.2934	0	1389	1411.99	1447	1450.93
23.3468	0	1458	1405.71	1481	1444.51
23.4002	0	1416	1399.45	1468	1438.13
23.4536	0	1424	1393.23	1440	1431.77
23.507	0	1397	1387.04	1439	1425.44
23.5604	1	1359	1380.93	1478	1419.18
23.6138	0	1381	1374.79	1381	1412.93
23.6672	0	1353	1368.68	1424	1406.69
23.7205	0	1368	1362.6	1419	1400.48
23.7739	1	1376	1356.6	1386	1394.33
23.8273	0	1310	1350.58	1413	1388.2
23.8807	0	1397	1344.58	1414	1382.07
23.9341	0	1340	1338.62	1370	1375.97
23.9875	1	1374	1332.73	1364	1369.94
24.0409	0	1333	1326.81	1397	1363.91
24.0942	0	1338	1320.93	1345	1357.9
24.1476	0	1243	1315.08	1408	1351.91
24.201	1	1364	1309.3	1380	1345.99
24.2544	1	1352	1303.55	1325	1340.12
24.3078	0	1357	1297.78	1374	1334.23
24.3612	2	1301	1292.13	1344	1328.42
24.4146	0	1329	1286.4	1304	1322.61
24.468	0	1322	1280.7	1282	1316.78
24.5214	0	1265	1275.03	1353	1310.99
24.5747	1	1237	1269.44	1252	1305.25
24.6281	1	1300	1263.87	1264	1299.56
24.6815	0	1169	1258.27	1263	1293.86
24.7349	0	1228	1252.7	1297	1288.17
24.7883	0	1301	1247.16	1247	1282.5
24.8417	0	1294	1241.64	1264	1276.86
24.8951	0	1275	1236.15	1310	1271.24
24.9484	0	1259	1230.69	1277	1265.66
25.0018	1	1169	1225.3	1290	1260.13
25.0552	0	1217	1219.88	1243	1254.61
25.1086	0	1222	1214.49	1241	1249.1
25.162	1	1174	1209.18	1168	1243.65
25.2154	0	1204	1203.83	1272	1238.2
25.2688	0	1151	1198.51	1172	1232.77
25.3222	0	1227	1193.22	1198	1227.35
25.3755	0	1217	1187.95	1223	1221.97
25.4289	0	1180	1182.71	1240	1216.6
25.4823	0	1164	1177.49	1222	1211.27
25.5357	0	1102	1172.29	1210	1205.95
25.5891	0	1150	1167.12	1212	1200.66
25.6425	0	1226	1161.97	1200	1195.4
25.6959	0	1162	1156.85	1289	1190.16
25.7492	0	1189	1151.75	1229	1184.94
25.8026	0	1111	1146.68	1251	1179.75
25.856	1	1161	1141.68	1177	1174.62
25.9094	0	1121	1136.64	1171	1169.49
25.9628	0	1110	1131.64	1160	1164.37
26.0162	1	1144	1126.71	1129	1159.31
26.0696	0	1119	1121.75	1160	1154.25
26.1229	0	1128	1116.81	1157	1149.2
26.1763	0	1081	1111.89	1209	1144.17
26.2297	1	1094	1107.05	1146	1139.2
26.2831	0	1151	1102.18	1127	1134.23
26.3365	1	1068	1097.38	1150	1129.3
26.3899	0	1076	1092.56	1161	1124.38
26.4433	1	1100	1087.8	1081	1119.5
26.4966	0	1082	1083.02	1084	1114.62
26.55	0	1071	1078.25	1095	1109.75
26.6034	0	1129	1073.51	1137	1104.9
26.6568	0	1043	1068.79	1056	1100.07
26.7102	0	1053	1064.09	1124	1095.26
26.7636	0	1087	1059.41	1123	1090.48
26.817	0	1093	1054.76	1108	1085.71
26.8704	0	1022	1050.13	1078	1080.97
26.9237	0	1023	1045.51	1096	1076.25
26.9771	0	1055	1040.92	1043	1071.55
27.0305	0	1048	1036.35	1077	1066.88
27.0839	0	1001	1031.8	1046	1062.22
27.1373	0	1048	1027.27	1038	1057.59
27.1907	0	1065	1022.77	1033	1052.97
27.2441	0	998	1018.28	1060	1048.38
27.2975	0	1018	1013.81	1079	1043.81
27.3508	0	1019	1009.37	1067	1039.26
27.4042	0	1048	1004.94	1069	1034.73
27.4576	0	1026	1000.54	1005	1030.22
27.511	0	1016	996.15	1114	1025.73
27.5644	0	966	991.785	1029	1021.26
27.6178	0	970	987.445	1056	1016.81
27.6712	1	998	983.171	994	1012.42
27.7246	0	948	978.863	996	1008.03
27.7779	0	963	974.575	982	1003.64
27.8313	0	953	970.307	992	999.271
27.8847	0	904	966.064	941	994.922
27.9381	1	1015	961.886	1000	990.628
27.9915	0	994	957.674	1039	986.335
28.0449	0	998	953.482	1011	982.043
28.0983	0	925	949.309	1022	977.771
28.1516	0	941	945.167	991	973.518
28.205	2	910	941.135	945	969.357
28.2584	0	976	937.016	995	965.178
28.3118	0	976	932.915	906	960.981
28.3652	0	936	928.834	939	956.802
28.4186	0	956	924.777	1017	952.643
28.472	1	939	920.785	965	948.538
28.5253	0	964	916.758	962	944.434
28.5787	0	907	912.749	949	940.33
28.6321	0	954	908.759	950	936.245
28.6855	0	918	904.787	935	932.177
28.7389	0	883	900.852	991	928.129
28.7923	3	909	897.071	913	924.208
28.8457	0	931	893.155	940	920.249
28.8991	1	898	889.303	940	916.289
28.9524	0	904	885.416	857	912.328
29.0058	0	852	881.546	923	908.367
29.0592	0	872	877.695	889	904.423
29.1126	0	832	873.868	947	900.498
29.166	1	883	870.104	901	896.626
29.2194	0	885	866.31	915	892.754
29.2728	1	827	862.579	903	888.917
29.3261	0	850	858.813	947	885.08
29.3795	0	846	855.064	927	881.24
29.4329	0	874	851.339	846	877.419
29.4863	1	840	847.676	905	873.651
29.5397	0	863	843.977	872	869.881
29.5931	0	771	840.296	872	866.11
29.6465	0	877	836.631	824	862.356
29.6999	0	831	832.983	861	858.619
29.7532	0	823	829.351	889	854.899
29.8066	0	810	825.737	849	851.196
29.86	0	829	822.138	816	847.51
29.9134	0	766	818.557	852	843.84
29.9668	0	800	814.991	883	840.186
30.0202	0	776	811.442	836	836.55
30.0736	0	808	807.908	787	832.929
30.127	0	806	804.391	807	829.325
30.1803	0	821	800.89	785	825.737
30.2337	0	763	797.404	757	822.165
30.2871	0	780	793.934	883	818.609
30.3405	0	800	790.48	817	815.069
30.3939	0	798	787.041	822	811.544
30.4473	0	778	783.618	830	808.036
30.5007	0	809	780.21	807	804.543
30.554	0	787	776.818	799	801.066
30.6074	0	765	773.44	814	797.605
30.6608	0	786	770.078	823	794.159
30.7142	0	711	766.731	789	790.728
30.7676	0	790	763.399	804	787.313
30.821	0	768	760.082	779	783.913
30.8744	0	750	756.78	787	780.528
30.9277	0	739	753.511	773	777.158
30.9811	3	706	750.393	777	773.912
31.0345	0	719	747.131	792	770.626
31.0879	0	788	743.883	765	767.298
31.1413	0	710	740.65	733	763.985
31.1947	0	689	737.439	792	760.687
31.2481	1	730	734.287	736	757.441
31.3015	0	779	731.097	752	754.19
31.3548	0	696	727.927	808	750.935
31.4082	1	740	724.817	717	747.731
31.4616	0	702	721.669	771	744.524
31.515	0	729	718.535	749	741.312
31.5684	0	683	715.416	731	738.114
31.6218	0	708	712.31	745	734.93
31.6752	0	728	709.225	790	731.761
31.7285	1	738	706.199	712	728.643
31.7819	0	701	703.134	729	725.52
31.8353	0	675	700.089	710	722.392
31.8887	1	753	697.103	680	719.315
31.9421	0	716	694.079	674	716.233
31.9955	0	712	691.068	702	713.146
32.0489	0	705	688.076	696	710.073
32.1023	1	682	685.15	674	707.051
32.1557	1	699	682.23	669	704.059
32.209	0	676	679.27	689	701.044
32.2624	0	672	676.324	689	698.024
32.3158	0	667	673.392	704	695.018
32.3692	0	702	670.473	681	692.025
32.4226	0	670	667.567	741	689.045
32.476	0	685	664.674	666	686.078
32.5294	0	611	661.8	720	683.125
32.5827	1	674	658.985	681	680.222
32.6361	0	708	656.13	663	677.313
32.6895	0	664	653.287	678	674.398
32.7429	0	627	650.458	640	671.496
32.7963	0	677	647.641	679	668.608
32.8497	0	644	644.837	680	665.732
32.9031	0	616	642.046	645	662.869
32.9564	0	648	639.267	655	660.019
33.0098	0	646	636.501	669	657.181
33.0632	0	638	633.747	689	654.356
33.1166	0	596	631.006	643	651.544
33.17	0	615	628.276	634	648.744
33.2234	0	608	625.559	589	645.956
33.2768	0	632	622.854	649	643.181
33.3302	0	653	620.161	638	640.418
33.3835	0	609	617.48	651	637.667
33.4369	0	629	614.811	664	634.929
33.4903	0	599	612.154	651	632.203
33.5437	0	657	609.509	606	629.488
33.5971	0	620	606.875	667	626.786
33.6505	0	597	604.253	649	624.096
33.7039	0	596	601.649	627	621.417
33.7572	1	577	599.102	614	618.787
33.8106	0	594	596.513	646	616.15
33.864	0	602	593.936	599	613.506
33.9174	0	594	591.371	574	610.873
33.9708	0	572	588.816	633	608.252
34.0242	0	551	586.274	564	605.643
34.0776	0	570	583.742	581	603.045
34.131	0	593	581.222	596	600.459
34.1843	0	566	578.713	563	597.884
34.2377	0	599	576.215	597	595.321
34.2911	0	594	573.728	607	592.769
34.3445	0	558	571.253	571	590.228
34.3979	0	599	568.788	556	587.698
34.4513	0	566	566.334	540	585.179
34.5047	0	555	563.891	592	582.672
34.5581	0	528	561.459	602	580.175
34.6114	0	559	559.037	569	577.69
34.6648	0	573	556.626	551	575.215
34.7182	0	538	554.232	600	572.751
34.7716	1	514	551.9	564	570.335
34.825	1	563	549.571	579	567.947
34.8784	0	556	547.2	561	565.532
34.9318	0	541	544.839	546	563.11
34.9851	0	554	542.489	553	560.698
35.0385	0	511	540.156	563	558.297
35.0919	1	502	537.878	522	555.943
35.1453	0	532	535.558	570	553.58
35.1987	0	490	533.248	544	551.21
35.2521	0	501	530.955	534	548.85
35.3055	1	513	528.724	495	546.537
35.3588	1	542	526.495	551	544.252
35.4122	0	503	524.223	524	541.94
35.4656	0	523	521.969	536	539.62
35.519	1	504	519.769	535	537.346
35.5724	0	514	517.527	566	535.064
35.6258	0	484	515.295	574	532.773
35.6792	0	554	513.074	535	530.493
35.7326	0	517	510.862	525	528.223
35.7859	0	519	508.66	559	525.963
35.8393	0	527	506.468	541	523.712
35.8927	0	499	504.286	539	521.472
35.9461	0	525	502.114	496	519.242
35.9995	0	492	499.952	541	517.021
36.0529	0	476	497.805	496	514.811
36.1063	1	487	495.713	515	512.646
36.1596	0	497	493.578	486	510.473
36.213	0	506	491.453	522	508.291
36.2664	0	485	489.343	498	506.118
36.3198	1	456	487.288	463	503.991
36.3732	0	475	485.195	507	501.855
36.4266	1	492	483.157	508	499.746
36.48	0	480	481.076	453	497.629
36.5334	0	524	479.005	502	495.501
36.5867	0	491	476.942	450	493.384
36.6401	0	475	474.889	501	491.275
36.6935	0	489	472.845	481	489.176
36.7469	0	429	470.817	445	487.087
36.8003	1	459	468.842	488	485.043
36.8537	0	472	466.824	458	482.989
36.9071	0	512	464.815	493	480.926
36.9605	0	479	462.816	464	478.872
37.0138	0	486	460.831	471	476.827
37.0672	1	454	458.9	473	474.827
37.1206	0	466	456.925	444	472.818
37.174	0	482	454.96	496	470.799
37.2274	0	439	453.003	456	468.789
37.2808	0	446	451.055	437	466.788
37.3342	0	456	449.115	468	464.796
37.3875	0	462	447.185	473	462.812
37.4409	0	462	445.262	485	460.838
37.4943	0	455	443.349	479	458.871
37.5477	0	454	441.444	432	456.914
37.6011	0	449	439.553	431	454.965
37.6545	1	450	437.716	499	453.061
37.7079	0	433	435.835	431	451.147
37.7612	0	406	433.974	443	449.223
37.8146	2	436	432.212	444	447.38
37.868	0	404	430.353	422	445.508
37.9214	0	432	428.502	423	443.607
37.9748	0	448	426.66	428	441.715
38.0282	0	408	424.832	453	439.831
38.0816	1	402	423.064	416	437.991
38.135	1	433	421.296	429	436.178
38.1883	0	410	419.49	477	434.336
38.2417	1	408	417.738	421	432.519
38.2951	0	413	415.941	456	430.692
38.3485	0	409	414.152	416	428.855
38.4019	0	415	412.371	482	427.026
38.4553	0	440	410.599	450	425.205
38.5087	0	424	408.834	458	423.392
38.562	0	440	407.078	429	421.587
38.6154	0	384	405.329	433	419.79
38.6688	0	410	403.589	448	418.001
38.7222	0	369	401.856	439	416.22
38.7756	0	355	400.131	436	414.446
38.829	0	406	398.413	418	412.681
38.8824	0	370	396.709	448	410.923
38.9358	1	424	395.059	425	409.21
38.9892	0	388	393.362	437	407.485
39.0425	0	397	391.674	406	405.75
39.0959	0	382	389.993	428	404.022
39.1493	0	355	388.319	393	402.301
39.2027	0	384	386.653	390	400.588
39.2561	0	373	384.995	419	398.883
39.3095	0	381	383.343	399	397.185
39.3629	0	395	381.705	412	395.495
39.4162	1	392	380.12	425	393.848
39.4696	0	392	378.489	401	392.19
39.523	0	367	376.865	370	390.521
39.5764	0	375	375.249	382	388.859
39.6298	0	377	373.64	380	387.204
39.6832	0	355	372.038	401	385.557
39.7366	0	383	370.442	376	383.917
39.7899	0	351	368.854	376	382.284
39.8433	0	354	367.274	357	380.658
39.8967	0	331	365.699	372	379.039
39.9501	0	359	364.132	341	377.427
40.0035	0	340	362.572	355	375.822
40.0569	0	375	361.019	391	374.224
40.1103	0	334	359.472	388	372.634
40.1636	0	367	357.939	389	371.05
40.217	1	344	356.457	355	369.509
40.2704	0	345	354.935	397	367.957
40.3238	1	385	353.466	371	366.429
40.3772	0	327	351.95	337	364.889
40.4306	0	366	350.441	380	363.338
40.484	0	377	348.939	316	361.793
40.5374	0	340	347.443	320	360.255
40.5907	0	372	345.955	380	358.724
40.6441	0	369	344.479	384	357.199
40.6975	1	316	343.06	358	355.718
40.7509	1	349	341.641	360	354.261
40.8043	0	351	340.176	381	352.773
40.8577	0	314	338.717	337	351.273
40.9111	0	369	337.271	340	349.779
40.9645	1	380	335.877	329	348.329
41.0178	0	330	334.436	359	346.867
41.0712	0	336	333.002	351	345.392
41.1246	0	304	331.575	331	343.924
41.178	0	302	330.154	315	342.462
41.2314	0	307	328.739	338	341.007
41.2848	0	285	327.331	333	339.558
41.3382	0	331	325.929	322	338.116
41.3916	0	306	324.533	315	336.679
41.4449	0	338	323.143	315	335.249
41.4983	0	339	321.766	341	333.826
41.5517	1	311	320.44	307	332.445
41.6051	0	317	319.067	341	331.051
41.6585	0	344	317.701	304	329.645
41.7119	0	309	316.34	335	328.245
41.7653	0	349	314.986	289	326.852
41.8186	0	307	313.638	330	325.464
41.872	0	311	312.295	314	324.082
41.9254	0	318	310.959	340	322.707
41.9788	0	326	309.628	301	321.337
42.0322	0	307	308.304	315	319.973
42.0856	0	305	306.985	322	318.616
42.139	0	300	305.672	299	317.264
42.1923	0	317	304.364	290	315.918
42.2457	0	284	303.069	315	314.578
42.2991	1	284	301.824	338	313.28
42.3525	0	274	300.539	317	311.969
42.4059	1	286	299.304	326	310.682
42.4593	0	270	298.022	322	309.382
42.5127	0	268	296.746	308	308.069
42.5661	0	297	295.476	319	306.762
42.6194	0	309	294.212	303	305.46
42.6728	0	263	292.953	303	304.164
42.7262	0	277	291.699	314	302.874
42.7796	0	298	290.452	285	301.589
42.833	0	275	289.209	273	300.31
42.8864	0	294	287.973	295	299.037
42.9398	0	259	286.741	306	297.769
42.9931	0	297	285.515	275	296.506
43.0465	0	297	284.295	317	295.249
43.0999	0	284	283.08	254	293.998
43.1533	0	259	281.87	316	292.752
43.2067	0	302	280.665	280	291.511
43.2601	0	299	279.472	302	290.275
43.3135	1	274	278.329	281	289.082
43.3669	0	263	277.139	259	287.875
43.4202	0	291	275.96	272	286.655
43.4736	1	291	274.831	243	285.476
43.527	0	289	273.655	267	284.284
43.5804	0	274	272.485	289	283.079
43.6338	0	298	271.319	263	281.879
43.6872	0	285	270.159	282	280.684
43.7406	0	288	269.004	272	279.494
43.794	0	243	267.854	289	278.31
43.8473	0	250	266.709	292	277.13
43.9007	0	284	265.569	251	275.956
43.9541	0	264	264.434	252	274.787
44.0075	0	230	263.304	286	273.623
44.0609	0	271	262.185	279	272.464
44.1143	1	258	261.117	265	271.346
44.1677	0	250	260	289	270.215
44.221	0	255	258.889	270	269.07
44.2744	0	276	257.782	268	267.93
44.3278	0	231	256.68	259	266.795
44.3812	0	280	255.583	253	265.665
44.4346	0	267	254.491	241	264.54
44.488	0	268	253.411	269	263.419
44.5414	1	263	252.379	256	262.34
44.5947	0	234	251.3	254	261.248
44.6481	0	226	250.226	290	260.141
44.7015	0	264	249.157	248	259.039
44.7549	0	291	248.098	250	257.942
44.8083	1	241	247.089	237	256.886
44.8617	0	257	246.033	257	255.816
44.9151	0	269	244.981	234	254.732
44.9685	0	234	243.94	252	253.653
45.0219	1	228	242.948	256	252.615
45.0752	0	234	241.909	236	251.564
45.1286	0	236	240.88	276	250.498
45.182	1	239	239.902	235	249.473
45.2354	0	223	238.875	264	248.434
45.2888	0	252	237.853	240	247.381
45.3422	0	243	236.836	257	246.333
45.3956	0	282	235.823	233	245.289
45.4489	0	237	234.815	247	244.25
45.5023	0	243	233.811	233	243.216
45.5557	0	236	232.818	218	242.186
45.6091	1	234	231.875	241	241.197
45.6625	0	214	230.889	240	240.194
45.7159	1	231	229.953	229	239.213
45.7693	0	210	228.969	244	238.218
45.8227	0	229	227.989	250	237.208
45.876	0	229	227.014	232	236.203
45.9294	0	209	226.043	222	235.203
45.9828	0	222	225.077	210	234.207
46.0362	0	189	224.121	245	233.215
46.0896	1	218	223.215	235	232.264
46.143	0	232	222.26	231	231.299
46.1964	0	202	221.31	228	230.319
46.2497	0	206	220.364	244	229.343
46.3031	0	237	219.422	239	228.372
46.3565	0	223	218.49	256	227.405
46.4099	1	217	217.614	230	226.479
46.4633	1	232	216.735	207	225.575
46.5167	0	233	215.82	223	224.638
46.5701	2	198	214.999	211	223.759
46.6234	0	202	214.077	232	222.847
46.6768	0	193	213.159	252	221.902
46.7302	0	216	212.246	211	220.961
46.7836	0	224	211.337	206	220.024
46.837	0	234	210.432	213	219.091
46.8904	0	203	209.531	173	218.163
46.9438	0	226	208.635	216	217.239
46.9972	0	181	207.749	216	216.318
47.0505	1	225	206.912	218	215.439
47.1039	0	200	206.026	230	214.545
47.1573	0	226	205.145	221	213.636
47.2107	0	204	204.267	200	212.731
47.2641	0	219	203.394	229	211.83
47.3175	0	197	202.531	206	210.933
47.3709	1	179	201.717	192	210.076
47.4243	0	193	200.854	211	209.205
47.4776	0	195	199.995	193	208.319
47.531	0	143	199.139	218	207.437
47.5844	0	182	198.288	205	206.559
47.6378	0	196	197.441	211	205.684
47.6912	0	191	196.597	237	204.814
47.7446	0	203	195.758	216	203.947
47.798	0	181	194.922	228	203.084
47.8513	0	186	194.089	211	202.225
47.9047	0	194	193.267	191	201.37
47.9581	1	199	192.493	179	200.555
48.0115	0	200	191.671	222	199.725
48.0649	0	189	190.852	184	198.879
48.1183	0	173	190.036	185	198.038
48.1717	0	175	189.225	183	197.2
48.2251	0	174	188.417	214	196.366
48.2784	0	204	187.612	212	195.535
48.3318	0	179	186.811	187	194.709
48.3852	0	195	186.014	206	193.885
48.4386	0	168	185.22	187	193.066
48.492	0	193	184.43	183	192.249
48.5454	0	182	183.643	219	191.437
48.5988	0	173	182.86	196	190.628
48.6521	0	213	182.08	177	189.822
48.7055	0	155	181.303	201	189.02
48.7589	0	167	180.53	194	188.221
48.8123	0	180	179.76	186	187.426
48.8657	0	186	178.994	195	186.634
48.9191	0	204	178.23	186	185.846
48.9725	0	162	177.47	155	185.061
49.0258	0	186	176.72	151	184.279
49.0792	1	177	176.018	185	183.537
49.1326	0	169	175.267	193	182.78
49.186	0	133	174.518	178	182.008
49.2394	0	176	173.774	177	181.239
49.2928	0	176	173.032	204	180.473
49.3462	0	172	172.294	187	179.71
49.3996	0	155	171.559	150	178.951
49.4529	0	178	170.833	203	178.195
49.5063	1	179	170.162	187	177.479
49.5597	1	156	169.487	159	176.783
49.6131	0	150	168.762	191	176.054
49.6665	0	161	168.046	167	175.309
49.7199	1	170	167.379	182	174.604
49.7733	0	178	166.663	183	173.884
49.8267	0	171	165.95	161	173.148
49.88	0	150	165.246	153	172.415
49.9334	1	184	164.591	175	171.722
49.9868	0	162	163.887	154	171.014
50.0402	0	157	163.185	193	170.29
50.0936	0	149	162.487	183	169.569
50.147	0	170	161.792	172	168.851
50.2004	0	142	161.101	188	168.137
50.2537	0	163	160.412	174	167.426
50.3071	0	166	159.733	165	166.718
50.3605	1	167	159.102	149	166.049
50.4139	0	163	158.428	184	165.365
50.4673	1	155	157.802	159	164.702
50.5207	0	166	157.126	157	164.023
50.5741	0	182	156.453	157	163.329
50.6275	0	160	155.784	167	162.637
50.6808	0	157	155.13	151	161.949
50.7342	2	145	154.57	142	161.337
50.7876	0	165	153.907	158	160.69
50.841	0	175	153.247	180	160.009
50.8944	0	169	152.59	164	159.331
50.9478	0	152	151.937	157	158.656
51.0012	0	153	151.286	180	157.984
51.0545	0	159	150.639	172	157.316
51.1079	0	169	150.001	136	156.65
51.1613	1	145	149.411	155	156.023
51.2147	0	168	148.771	152	155.381
51.2681	0	158	148.134	159	154.723
51.3215	0	158	147.501	125	154.068
51.3749	0	150	146.876	163	153.416
51.4282	1	134	146.312	159	152.804
51.4816	2	142	145.788	151	152.248
51.535	0	133	145.162	138	151.64
51.5884	0	162	144.538	143	150.996
51.6418	0	139	143.918	153	150.356
51.6952	0	130	143.301	152	149.718
51.7486	0	162	142.687	152	149.084
51.802	0	121	142.076	146	148.452
51.8554	0	147	141.467	145	147.824
51.9087	0	142	140.862	166	147.198
51.9621	0	148	140.259	173	146.574
52.0155	0	155	139.66	143	145.954
52.0689	0	131	139.062	142	145.337
52.1223	0	140	138.468	146	144.722
52.1757	0	152	137.883	145	144.11
52.2291	1	139	137.351	148	143.537
52.2824	1	139	136.815	166	142.984
52.3358	0	147	136.228	135	142.397
52.3892	0	133	135.645	153	141.794
52.4426	0	132	135.064	130	141.193
52.496	0	129	134.486	137	140.595
52.5494	0	161	133.917	116	140
52.6028	1	140	133.395	146	139.444
52.6561	0	132	132.824	143	138.872
52.7095	0	128	132.255	139	138.284
52.7629	0	123	131.689	147	137.699
52.8163	0	131	131.125	138	137.116
52.8697	0	142	130.564	124	136.535
52.9231	0	129	130.012	120	135.958
52.9765	1	122	129.508	144	135.419
53.0299	0	128	128.953	137	134.864
53.0832	0	122	128.401	130	134.293
53.1366	0	112	127.852	142	133.725
53.19	0	133	127.305	117	133.159
53.2434	0	155	126.766	111	132.595
53.2968	1	113	126.276	135	132.071
53.3502	0	124	125.735	147	131.53
53.4036	0	100	125.197	147	130.973
53.4569	0	125	124.667	127	130.419
53.5103	1	128	124.185	116	129.903
53.5637	0	119	123.653	128	129.372
53.6171	0	113	123.123	132	128.824
53.6705	0	113	122.596	137	128.278
53.7239	0	98	122.071	102	127.735
53.7773	0	132	121.549	116	127.195
53.8307	0	101	121.029	135	126.656
53.884	0	126	120.511	124	126.121
53.9374	0	107	119.996	131	125.587
53.9908	0	139	119.483	151	125.056
54.0442	0	119	118.973	124	124.527
54.0976	0	109	118.465	137	124.001
54.151	0	123	117.959	130	123.477
54.2044	0	113	117.455	119	122.955
54.2578	0	108	116.953	105	122.435
54.3111	0	135	116.46	134	121.918
54.3645	1	120	116.015	125	121.439
54.4179	0	113	115.518	117	120.944
54.4713	0	115	115.024	129	120.432
54.5247	0	93	114.532	127	119.923
54.5781	0	124	114.043	128	119.416
54.6315	0	108	113.556	115	118.911
54.6848	0	108	113.07	115	118.409
54.7382	0	118	112.587	120	117.908
54.7916	0	103	112.119	129	117.41
54.845	2	123	111.743	131	116.986
54.8984	0	116	111.263	120	116.528
54.9518	0	108	110.786	124	116.035
55.0052	0	98	110.312	135	115.543
55.0585	0	88	109.839	124	115.054
55.1119	0	114	109.369	107	114.567
55.1653	0	127	108.9	113	114.082
55.2187	0	101	108.434	111	113.599
55.2721	0	99	107.971	113	113.119
55.3255	0	98	107.509	107	112.64
55.3789	0	118	107.049	121	112.164
55.4323	0	107	106.592	117	111.69
55.4856	0	113	106.136	118	111.217
55.539	0	111	105.683	107	110.747
55.5924	0	106	105.231	105	110.279
55.6458	0	116	104.782	117	109.813
55.6992	0	99	104.334	86	109.349
55.7526	0	121	103.895	114	108.887
55.806	1	120	103.503	98	108.463
55.8593	0	97	103.06	121	108.023
55.9127	0	100	102.619	100	107.566
55.9661	0	112	102.18	119	107.111
56.0195	0	110	101.743	100	106.658
56.0729	0	108	101.308	98	106.207
56.1263	0	114	100.875	96	105.758
56.1797	0	96	100.444	117	105.311
56.2331	0	95	100.015	108	104.866
56.2864	0	103	99.5875	105	104.423
56.3398	0	117	99.1621	109	103.982
56.3932	0	81	98.7386	104	103.542
56.4466	0	118	98.317	102	103.105
56.5	0	118	97.8972	113	102.669
56.5534	0	108	97.4793	95	102.236
56.6068	0	102	97.0632	97	101.804
56.6602	0	90	96.6489	105	101.374
56.7135	0	97	96.2364	109	100.946
56.7669	0	97	95.8256	102	100.519
56.8203	0	97	95.4167	104	100.095
56.8737	0	98	95.0157	102	99.6722
56.9271	1	79	94.6617	102	99.2878
56.9805	0	93	94.2566	99	98.8867
57.0339	0	96	93.8533	97	98.4685
57.0872	0	94	93.4519	106	98.0521
57.1406	0	117	93.0523	118	97.6376
57.194	0	86	92.6545	108	97.2248
57.2474	0	78	92.2585	83	96.8139
57.3008	0	79	91.8642	98	96.4047
57.3542	0	100	91.4717	90	95.9973
57.4076	0	90	91.0872	84	95.5917
57.4609	1	78	90.7495	103	95.2242
57.5143	0	105	90.3607	90	94.84
57.5677	0	95	89.9737	109	94.4386
57.6211	0	90	89.5885	94	94.0391
57.6745	0	91	89.2051	88	93.6413
57.7279	0	84	88.8297	105	93.2452
57.7813	1	71	88.5011	86	92.8873
57.8347	0	81	88.1214	92	92.5126
57.888	0	97	87.756	107	92.1207
57.9414	2	91	87.4826	88	91.8035
57.9948	0	92	87.1055	86	91.451
58.0482	0	90	86.7303	90	91.0625
58.1016	0	92	86.357	88	90.6758
58.155	0	96	85.9918	98	90.291
58.2084	1	89	85.6736	95	89.9443
58.2617	0	91	85.3044	87	89.5808
58.3151	0	89	84.9372	79	89.2003
58.3685	0	76	84.5717	103	88.8215
58.4219	0	85	84.2144	94	88.4445
58.4753	1	73	83.9039	84	88.1056
58.5287	0	93	83.5425	78	87.7499
58.5821	0	85	83.1828	92	87.3771
58.6355	0	97	82.825	83	87.006
58.6889	0	81	82.4752	87	86.6367
58.7422	1	105	82.1722	101	86.3054
58.7956	0	76	81.8182	104	85.9573
58.849	0	93	81.466	95	85.5921
58.9024	0	92	81.1155	87	85.2285
58.9558	0	80	80.7668	76	84.8666
59.0092	0	88	80.4198	104	84.5064
59.0626	0	66	80.0807	94	84.1478
59.1159	1	87	79.7883	90	83.8273
59.1693	0	82	79.4449	94	83.4899
59.2227	0	73	79.1031	109	83.1352
59.2761	0	69	78.763	94	82.7822
59.3295	0	77	78.4246	101	82.4308
59.3829	0	85	78.0878	96	82.081
59.4363	0	81	77.7588	89	81.7328
59.4896	1	88	77.4827	103	81.4226
59.543	1	72	77.2006	86	81.1319
59.5964	0	68	76.8673	92	80.8053
59.6498	0	85	76.5358	91	80.4615
59.7032	0	68	76.206	79	80.1193
59.7566	0	81	75.8778	93	79.7788
59.81	0	80	75.5513	71	79.4398
59.8634	0	76	75.2264	76	79.1023
59.9167	0	82	74.9031	80	78.7664
59.9701	0	64	74.5813	71	78.4321
60.0235	0	72	74.2611	85	78.0992
60.0769	0	88	73.9485	89	77.7679
60.1303	1	101	73.6826	88	77.4744
60.1837	0	75	73.3654	75	77.164
60.2371	0	64	73.0498	76	76.8362
60.2904	0	79	72.7357	81	76.5098
60.3438	0	55	72.4231	75	76.185
60.3972	0	66	72.112	88	75.8616
60.4506	0	69	71.8024	75	75.5397
60.504	0	91	71.4942	73	75.2193
60.5574	0	80	71.1874	80	74.9002
60.6108	0	77	70.8821	80	74.5826
60.6642	0	70	70.5782	70	74.2664
60.7175	0	68	70.2756	71	73.9516
60.7709	0	64	69.9806	71	73.6382
60.8243	1	71	69.7321	71	73.3626
60.8777	0	69	69.4322	76	73.0699
60.9311	0	83	69.1338	62	72.7597
60.9845	0	70	68.8367	81	72.4509
61.0379	0	72	68.541	70	72.1434
61.0913	0	62	68.2468	82	71.8374
61.1446	0	85	67.9539	66	71.5327
61.198	0	76	67.6623	92	71.2293
61.2514	0	74	67.3783	75	70.9274
61.3048	1	72	67.1407	77	70.6631
61.3582	0	71	66.8517	83	70.3817
61.4116	0	87	66.5641	92	70.0827
61.465	0	93	66.2779	71	69.7851
61.5183	0	74	65.993	76	69.4889
61.5717	0	76	65.7095	81	69.194
61.6251	0	73	65.4273	67	68.9004
61.6785	0	61	65.1464	60	68.6081
61.7319	0	69	64.8668	74	68.317
61.7853	0	62	64.5884	64	68.0273
61.8387	0	63	64.3114	69	67.7389
61.892	0	66	64.0356	53	67.4517
61.9454	0	64	63.761	67	67.1658
61.9988	0	78	63.4877	67	66.8811
62.0522	0	79	63.2155	63	66.5977
62.1056	0	59	62.9446	68	66.3155
62.159	0	67	62.6749	53	66.0346
62.2124	0	60	62.4064	65	65.7548
62.2658	0	65	62.1452	71	65.4763
62.3191	1	55	61.9304	58	65.2353
62.3725	0	64	61.6639	49	64.9771
62.4259	0	70	61.3987	59	64.7013
62.4793	0	66	61.1348	55	64.4266
62.5327	0	64	60.8721	60	64.1532
62.5861	0	75	60.6168	60	63.881
62.6395	1	60	60.4079	67	63.6464
62.6928	0	65	60.1474	62	63.3945
62.7462	0	65	59.8882	62	63.1249
62.7996	0	56	59.6302	57	62.8566
62.853	0	56	59.3735	69	62.5895
62.9064	0	62	59.118	60	62.3236
62.9598	0	55	58.8637	64	62.0589
63.0132	0	59	58.6106	59	61.7953
63.0666	0	57	58.3587	78	61.533
63.12	0	70	58.108	62	61.2718
63.1733	0	59	57.8584	47	61.0117
63.2267	0	62	57.6099	56	60.7528
63.2801	0	48	57.3626	62	60.495
63.3335	0	57	57.1226	67	60.2384
63.3869	1	60	56.9288	57	60.0193
63.4403	0	56	56.6833	52	59.7828
63.4937	0	61	56.4391	60	59.5286
63.547	0	54	56.196	57	59.2756
63.6004	0	49	55.9541	69	59.0236
63.6538	0	56	55.7133	58	58.7728
63.7072	0	64	55.4736	59	58.5232
63.7606	0	64	55.2351	51	58.2746
63.814	0	66	54.9977	61	58.0271
63.8674	0	56	54.7675	61	57.7807
63.9207	1	54	54.5836	70	57.5718
63.9741	0	63	54.3479	55	57.3456
64.0275	0	51	54.1134	69	57.1015
64.0809	0	56	53.8863	61	56.8585
64.1343	1	53	53.7055	56	56.6531
64.1877	0	53	53.4729	55	56.4302
64.2411	0	47	53.2416	55	56.1896
64.2944	0	65	53.0115	50	55.9501
64.3478	0	57	52.7825	60	55.7117
64.4012	0	49	52.5547	56	55.4745
64.4546	0	79	52.3279	67	55.2383
64.508	0	55	52.1023	51	55.0031
64.5614	0	49	51.8777	63	54.7691
64.6148	0	58	51.6543	54	54.5361
64.6682	0	54	51.4318	49	54.3041
64.7215	0	47	51.2104	57	54.0732
64.7749	0	54	50.99	48	53.8433
64.8283	0	57	50.7707	58	53.6144
64.8817	0	46	50.5523	56	53.3866
64.9351	0	65	50.3349	62	53.1597
64.9885	0	37	50.1185	49	52.9339
65.0419	0	51	49.9031	65	52.709
65.0952	0	53	49.6887	55	52.4851
65.1486	0	56	49.4751	60	52.2622
65.202	0	56	49.2626	58	52.0403
65.2554	0	48	49.0509	59	51.8193
65.3088	0	46	48.8402	53	51.5993
65.3622	0	47	48.6429	51	51.3802
65.4156	2	50	48.5367	58	51.2349
65.469	0	49	48.3321	54	51.0536
65.5224	1	42	48.1738	68	50.8719
65.5757	0	41	47.9638	52	50.6728
65.6291	0	47	47.755	55	50.4558
65.6825	0	52	47.5473	56	50.2399
65.7359	0	47	47.3408	47	50.025
65.7893	0	57	47.1416	46	49.8111
65.8427	1	50	46.9886	33	49.6347
65.8961	0	56	46.7839	41	49.4408
65.9494	0	49	46.5803	60	49.229
66.0028	0	34	46.3779	56	49.0183
66.0562	0	52	46.1765	47	48.8086
66.1096	0	46	45.9824	52	48.5998
66.163	1	53	45.8344	49	48.4285
66.2164	0	52	45.6347	45	48.2397
66.2698	0	48	45.4361	50	48.033
66.3231	0	49	45.2386	41	47.8273
66.3765	0	39	45.0422	59	47.6225
66.4299	0	41	44.8468	50	47.4188
66.4833	0	48	44.6523	42	47.216
66.5367	0	43	44.4589	55	47.0142
66.5901	0	43	44.2664	62	46.8133
66.6435	0	48	44.0749	54	46.6134
66.6969	0	43	43.8843	44	46.4144
66.7502	0	45	43.6946	41	46.2163
66.8036	0	49	43.5121	41	46.0191
66.857	1	42	43.3755	50	45.8592
66.9104	0	37	43.1871	52	45.6817
66.9638	0	51	42.9997	48	45.4862
67.0172	0	50	42.8132	57	45.2916
67.0706	0	49	42.6276	46	45.098
67.1239	0	41	42.443	62	44.9053
67.1773	0	45	42.2593	47	44.7134
67.2307	0	52	42.0765	42	44.5225
67.2841	0	49	41.8945	41	44.3324
67.3375	0	48	41.7134	44	44.1431
67.3909	0	46	41.5394	36	43.9548
67.4443	1	48	41.4113	36	43.8037
67.4977	0	46	41.2313	48	43.6349
67.551	0	38	41.0523	49	43.4481
67.6044	0	42	40.8741	46	43.2622
67.6578	0	35	40.6969	33	43.0772
67.7112	0	46	40.5205	51	42.893
67.7646	0	41	40.345	37	42.7097
67.818	0	33	40.1703	39	42.5272
67.8714	0	39	39.9965	40	42.3455
67.9248	0	37	39.8235	41	42.1647
67.9781	0	48	39.6576	46	41.9847
68.0315	1	37	39.5375	38	41.8419
68.0849	0	42	39.3717	39	41.6814
68.1383	1	35	39.2519	33	41.5393
68.1917	0	44	39.0803	40	41.3795
68.2451	0	41	38.9096	46	41.2017
68.2985	0	40	38.7398	50	41.0248
68.3518	0	38	38.571	50	40.8487
68.4052	0	32	38.403	37	40.6735
68.4586	0	35	38.236	44	40.4991
68.512	0	41	38.0698	42	40.3255
68.5654	0	45	37.9106	34	40.1528
68.6188	1	33	37.8036	34	40.0172
68.6722	1	38	37.6898	30	39.9004
68.7255	0	42	37.5241	45	39.7471
68.7789	0	34	37.3595	45	39.5757
68.8323	0	43	37.1958	31	39.4052
68.8857	0	37	37.0392	52	39.2355
68.9391	1	50	36.9287	34	39.1031
68.9925	0	45	36.7663	36	38.953
69.0459	0	41	36.6111	36	38.785
69.0993	1	33	36.502	41	38.6541
69.1526	0	47	36.341	32	38.5057
69.206	0	36	36.181	37	38.3392
69.2594	0	39	36.022	34	38.1736
69.3128	0	37	35.8639	42	38.0088
69.3662	0	38	35.7068	45	37.8449
69.4196	0	37	35.5505	39	37.6818
69.473	0	36	35.3951	41	37.5194
69.5263	0	39	35.2405	36	37.358
69.5797	0	31	35.0868	42	37.1972
69.6331	0	37	34.9339	43	37.0373
69.6865	0	44	34.7817	36	36.8781
69.7399	0	43	34.6303	36	36.7197
69.7933	0	42	34.4859	31	36.562
69.8467	1	40	34.3873	32	36.4415
69.9001	0	45	34.2367	38	36.3033
69.9535	0	26	34.087	45	36.1469
70.0068	0	42	33.938	49	35.9912
70.0602	0	41	33.796	37	35.8364
70.1136	1	42	33.7	39	35.7186
70.167	0	31	33.5519	45	35.5832
70.2204	0	30	33.4047	29	35.4295
70.2738	0	39	33.2583	25	35.2767
70.3272	0	29	33.1127	47	35.1246
70.3805	0	39	32.9679	33	34.9733
70.4339	0	37	32.8239	40	34.8227
70.4873	0	32	32.6868	39	34.6728
70.5407	1	31	32.5956	38	34.5601
70.5941	0	38	32.4523	40	34.4295
70.6475	0	33	32.3099	40	34.2809
70.7009	0	32	32.1683	36	34.1329
70.7542	0	29	32.0274	47	33.9857
70.8076	0	30	31.8873	33	33.8392
70.861	0	30	31.7541	37	33.6934
70.9144	1	30	31.6668	29	33.5847
70.9678	0	31	31.5274	33	33.4582
71.0212	0	38	31.3888	37	33.3136
71.0746	0	20	31.251	41	33.1697
71.1279	0	29	31.1202	29	33.0265
71.1813	1	29	31.0353	31	32.9204
71.2347	0	33	30.9169	31	32.7965
71.2881	3	25	30.9348	38	32.7637
71.3415	0	34	30.7951	31	32.6761
71.3949	0	36	30.6628	40	32.5327
71.4483	1	40	30.5766	32	32.4266
71.5017	0	36	30.4387	23	32.3028
71.555	0	27	30.3019	28	32.161
71.6084	0	23	30.1723	34	32.02
71.6618	1	31	30.0888	28	31.9163
71.7152	0	24	29.9535	29	31.7949
71.7686	0	35	29.8192	28	31.6554
71.822	0	27	29.6859	36	31.5167
71.8754	0	35	29.5535	32	31.3788
71.9287	0	21	29.422	36	31.2417
71.9821	0	43	29.2913	33	31.1054
72.0355	0	34	29.1615	32	30.9698
72.0889	0	34	29.0325	36	30.8349
72.1423	0	32	28.9042	33	30.7008
72.1957	0	32	28.7829	39	30.5674
72.2491	1	25	28.7075	37	30.471
72.3025	0	33	28.5924	31	30.3569
72.3559	2	29	28.5684	30	30.2974
72.4092	0	33	28.4396	23	30.2017
72.4626	0	27	28.3118	39	30.0689
72.516	0	38	28.1849	22	29.9369
72.5694	0	29	28.0589	36	29.8057
72.6228	0	29	27.9337	32	29.6752
72.6762	0	21	27.8094	37	29.5454
72.7296	0	29	27.6859	32	29.4164
72.7829	0	24	27.5631	25	29.2881
72.8363	0	29	27.4411	38	29.1604
72.8897	0	31	27.3198	32	29.0334
72.9431	0	34	27.1992	42	28.9071
72.9965	0	32	27.0792	32	28.7815
73.0499	0	23	26.9599	33	28.6564
73.1033	0	24	26.8413	31	28.532
73.1566	0	30	26.7233	27	28.4082
73.21	0	31	26.6059	44	28.2851
73.2634	0	19	26.4953	33	28.1625
73.3168	1	22	26.4304	24	28.0769
73.3702	0	21	26.3133	30	27.9734
73.4236	0	27	26.197	27	27.8517
73.477	0	33	26.0812	26	27.7306
73.5304	0	20	25.9661	35	27.61
73.5837	0	24	25.8517	29	27.4901
73.6371	0	21	25.7378	41	27.3708
73.6905	0	27	25.6246	34	27.2521
73.7439	0	22	25.5119	30	27.1339
73.7973	0	27	25.3998	33	27.0163
73.8507	0	30	25.2883	30	26.8992
73.9041	0	26	25.1773	24	26.7828
73.9574	0	18	25.0731	33	26.6668
74.0108	1	21	25.0145	24	26.5878
74.0642	0	23	24.9037	32	26.4909
74.1176	0	31	24.7935	29	26.3757
74.171	0	31	24.6839	25	26.261
74.2244	0	22	24.575	33	26.1469
74.2778	0	24	24.4666	27	26.0333
74.3312	0	25	24.3588	28	25.9203
74.3845	0	30	24.2577	23	25.8078
74.4379	1	34	24.2024	31	25.7323
74.4913	0	19	24.0948	30	25.6388
74.5447	0	22	23.9878	34	25.527
74.5981	0	22	23.8815	21	25.4158
74.6515	0	22	23.7757	22	25.3051
74.7049	0	28	23.6706	30	25.195
74.7583	0	27	23.566	29	25.0854
74.8116	0	18	23.462	28	24.9764
74.865	0	19	23.3585	25	24.8679
74.9184	0	23	23.2555	23	24.7599
74.9718	0	21	23.1531	21	24.6524
75.0252	0	25	23.0512	15	24.5454
75.0786	0	22	22.956	18	24.4389
75.132	1	33	22.9064	28	24.3693
75.1853	0	17	22.8046	22	24.2818
75.2387	0	20	22.7033	26	24.1758
75.2921	0	24	22.6026	34	24.0704
75.3455	0	13	22.5025	21	23.9656
75.3989	0	31	22.4029	25	23.8612
75.4523	0	26	22.3038	31	23.7573
75.5057	0	16	22.2115	23	23.654
75.559	1	35	22.1711	17	23.5876
75.6124	1	27	22.1234	12	23.5395
75.6658	0	17	22.0237	25	23.4546
75.7192	0	25	21.9246	24	23.3514
75.7726	0	16	21.8324	27	23.2488
75.826	1	20	21.786	23	23.1831
75.8794	0	20	21.6874	27	23.0995
75.9328	0	14	21.5895	26	22.9976
75.9861	0	23	21.4923	29	22.8962
76.0395	0	26	21.3958	21	22.7955
76.0929	0	15	21.2999	26	22.6952
76.1463	0	20	21.2046	27	22.5955
76.1997	0	22	21.1098	28	22.4964
76.2531	0	18	21.0219	26	22.3977
76.3065	1	23	20.9921	24	22.336
76.3598	2	21	21.0127	14	22.3292
76.4132	2	18	21.0186	32	22.3398
76.4666	0	21	20.9199	24	22.2763
76.52	0	22	20.8221	19	22.1757
76.5734	0	23	20.7316	25	22.0758
76.6268	1	20	20.6932	30	22.013
76.6802	1	19	20.6481	13	21.9688
76.7336	0	25	20.5512	20	21.888
76.787	0	20	20.4552	20	21.7889
76.8403	0	24	20.3664	16	21.6905
76.8937	1	16	20.3235	26	21.6293
76.9471	0	23	20.2287	21	21.5502
77.0005	0	30	20.1348	26	21.4529
77.0539	0	16	20.0418	21	21.3563
77.1073	0	17	19.9496	27	21.2603
77.1607	0	21	19.8581	27	21.165
77.214	0	32	19.7673	23	21.0703
77.2674	0	31	19.6773	19	20.9762
77.3208	0	24	19.5879	17	20.8826
77.3742	0	22	19.4991	14	20.7897
77.4276	0	25	19.4109	20	20.6972
77.481	0	23	19.3296	26	20.6053
77.5344	1	16	19.2939	24	20.5504
77.5877	0	15	19.2059	22	20.4775
77.6411	0	15	19.1187	26	20.3862
77.6945	0	23	19.032	19	20.2954
77.7479	0	19	18.9459	18	20.2052
77.8013	0	26	18.8604	24	20.1156
77.8547	0	20	18.7754	28	20.0264
77.9081	0	24	18.6909	28	19.9377
77.9614	0	20	18.607	20	19.8495
78.0148	0	26	18.5235	21	19.7618
78.0682	0	23	18.4405	24	19.6745
78.1216	0	33	18.358	19	19.5877
78.175	0	17	18.276	23	19.5013
78.2284	0	10	18.1943	24	19.4154
78.2818	0	19	18.1131	20	19.33
78.3352	0	14	18.0386	32	19.2449
78.3885	1	15	18.0096	19	19.1967
78.4419	0	23	17.9282	15	19.1304
78.4953	0	19	17.8473	15	19.0457
78.5487	0	18	17.7669	18	18.9614
78.6021	0	11	17.687	26	18.8775
78.6555	0	15	17.6076	16	18.7942
78.7089	0	18	17.5286	22	18.7112
78.7622	0	17	17.4501	16	18.6287
78.8156	0	14	17.3719	17	18.5465
78.869	0	24	17.2942	12	18.4648
78.9224	0	21	17.2169	17	18.3835
78.9758	0	22	17.14	15	18.3026
79.0292	0	22	17.0635	23	18.2221
79.0826	0	22	16.9874	19	18.142
79.136	0	14	16.9117	22	18.0622
79.1894	0	19	16.8363	19	17.9828
79.2427	0	20	16.7613	23	17.9038
79.2961	0	27	16.6867	26	17.8252
79.3495	0	23	16.6124	19	17.747
79.4029	0	10	16.5385	12	17.6691
79.4563	0	12	16.4649	17	17.5915
79.5097	0	14	16.3916	29	17.5143
79.5631	0	16	16.3187	13	17.4375
79.6164	0	20	16.2461	16	17.361
79.6698	0	19	16.1739	21	17.2849
79.7232	0	17	16.102	16	17.2091
79.7766	0	20	16.0428	10	17.1336
79.83	2	14	16.0742	11	17.1314
79.8834	0	11	16.0004	20	17.0924
79.9368	0	18	15.9272	16	17.0161
79.9901	0	22	15.8544	20	16.9402
80.0435	0	19	15.7822	20	16.8648
80.0969	0	20	15.7104	22	16.7898
80.1503	0	14	15.6391	17	16.7151
80.2037	0	19	15.5683	20	16.6409
80.2571	0	15	15.4978	22	16.567
80.3105	0	18	15.4278	24	16.4936
80.3639	0	24	15.3582	18	16.4205
80.4172	0	14	15.289	17	16.3478
80.4706	0	16	15.2202	17	16.2754
80.524	0	21	15.1517	25	16.2034
80.5774	0	20	15.0836	14	16.1318
80.6308	0	21	15.0159	20	16.0604
80.6842	0	19	14.9485	22	15.9895
80.7376	0	18	14.8814	22	15.9189
80.7909	0	14	14.8147	15	15.8486
80.8443	0	16	14.7483	10	15.7787
80.8977	0	15	14.6823	17	15.709
80.9511	0	21	14.6166	12	15.6397
81.0045	0	19	14.5511	12	15.5708
81.0579	0	13	14.486	17	15.5021
81.1113	0	13	14.4212	18	15.4338
81.1647	0	12	14.3567	17	15.3657
81.218	0	23	14.2925	19	15.298
81.2714	0	17	14.2286	19	15.2306
81.3248	0	20	14.165	15	15.1635
81.3782	0	19	14.1079	14	15.0967
81.4316	1	10	14.0962	16	15.0666
81.485	0	22	14.032	14	15.0183
81.5384	0	11	13.9682	22	14.9514
81.5918	0	12	13.911	17	14.8849
81.6451	1	13	13.8993	17	14.8552
81.6985	0	14	13.8352	23	14.8073
81.7519	0	20	13.7716	24	14.7409
81.8053	0	14	13.7084	17	14.6748
81.8587	0	16	13.6456	18	14.6091
81.9121	0	8	13.5833	12	14.5437
81.9655	0	12	13.5213	20	14.4788
82.0188	0	17	13.4597	12	14.4141
82.0722	0	23	13.3985	17	14.3498
82.1256	0	20	13.3377	14	14.2858
82.179	0	14	13.2834	14	14.2222
82.2324	1	12	13.2745	11	14.1952
82.2858	0	11	13.2133	24	14.1502
82.3392	0	15	13.1587	19	14.0865
82.3925	1	11	13.1496	17	14.0597
82.4459	0	12	13.0944	16	14.0147
82.4993	1	15	13.0909	16	13.9876
82.5527	1	26	13.0804	12	13.9788
82.6061	0	15	13.0176	8	13.933
82.6595	0	14	12.9555	14	13.8689
82.7129	0	23	12.9002	23	13.8051
82.7663	1	16	12.8906	8	13.7783
82.8196	0	11	12.8288	16	13.7333
82.873	0	19	12.7676	14	13.67
82.9264	0	18	12.707	16	13.6071
82.9798	0	12	12.647	23	13.5446
83.0332	0	19	12.5937	12	13.4825
83.0866	1	13	12.586	15	13.4573
83.14	0	12	12.526	12	13.414
83.1933	0	11	12.4667	18	13.3522
83.2467	0	13	12.4078	11	13.2909
83.3001	0	19	12.3494	16	13.2299
83.3535	0	10	12.2916	14	13.1694
83.4069	0	15	12.2342	7	13.1092
83.4603	0	16	12.1772	11	13.0495
83.5137	0	17	12.1268	6	12.9901
83.5671	1	7	12.122	11	12.9674
83.6205	0	12	12.0648	11	12.9267
83.6738	0	10	12.0143	14	12.8674
83.7272	1	12	12.0156	17	12.8449
83.7806	1	11	12.0159	11	12.8407
83.834	1	13	12.009	18	12.836
83.8874	0	5	11.9563	15	12.7943
83.9408	1	14	11.9493	16	12.7707
83.9942	0	17	11.8903	15	12.729
84.0475	0	13	11.8319	19	12.6689
84.1009	0	11	11.7742	12	12.6093
84.1543	0	11	11.7172	15	12.5503
84.2077	0	11	11.6669	12	12.4916
84.2611	1	16	11.6624	19	12.4698
84.3145	0	13	11.6056	10	12.43
84.3679	0	14	11.5494	13	12.3717
84.4213	0	12	11.4938	16	12.3138
84.4746	0	18	11.4387	8	12.2564
[truncated: 2,096 more rows]

## Sheet: Figure1 (e)
350.017	154.878	350.017	28.3994
350.981	186.737	350.981	32.3414
351.945	250.442	351.945	61.7825
352.909	341.566	352.909	135.059
353.874	374.858	353.874	218.674
354.838	290.65	354.838	212.53
355.802	213.619	355.802	157.31
356.766	186.24	356.766	112.733
357.731	187.211	357.731	83.4445
358.695	195.692	358.695	63.2514
359.659	196.115	359.659	48.5878
360.623	183.747	360.623	39.4671
361.588	167.522	361.588	36.8338
362.552	158.339	362.552	40.2342
363.516	160.369	363.516	48.3532
364.48	172.713	364.48	59.8691
365.445	191.795	365.445	72.9187
366.409	209.975	366.409	83.2791
367.373	213.626	367.373	83.3636
368.337	194.151	368.337	69.4615
369.301	165.885	369.301	51.5483
370.266	148.24	370.266	41.0844
371.23	145.099	371.23	39.7466
372.194	152.822	372.194	45.4458
373.158	168.179	373.158	57.4721
374.123	187.854	374.123	76.669
375.087	202.119	375.087	100.227
376.051	195.106	376.051	112.969
377.015	173.173	377.015	105.482
377.979	157.634	377.979	91.4427
378.944	153.115	378.944	81.1464
379.908	156.275	379.908	75.9619
380.872	164.632	380.872	75.3274
381.837	177.118	381.837	79.3031
382.801	192.538	382.801	88.5689
383.765	207.026	383.765	102.441
384.729	213.413	384.729	115.303
385.693	208.881	385.693	119.423
386.658	199.59	386.658	114.432
387.622	191.627	387.622	105.42
388.586	186.575	388.586	96.29
389.55	183.976	389.55	88.9922
390.515	183.147	390.515	84.5867
391.479	183.527	391.479	83.5818
392.443	184.605	392.443	85.8562
393.407	185.868	393.407	90.5894
394.372	186.835	394.372	96.174
395.336	187.067	395.336	100.006
396.3	186.212	396.3	98.821
397.264	184.229	397.264	91.4269
398.228	181.721	398.228	82.0824
399.193	179.62	399.193	76.9433
400.157	178.557	400.157	77.8607
401.121	178.835	401.121	83.0903
402.085	180.58	402.085	90.204
403.05	183.609	403.05	96.996
404.014	187.117	404.014	101.485
404.978	189.608	404.978	102.335
405.942	189.582	405.942	99.746
406.906	186.707	406.906	95.587
407.871	182.167	407.871	92.0185
408.835	177.776	408.835	89.9528
409.799	174.911	409.799	88.856
410.764	174.064	410.764	87.669
411.728	174.996	411.728	85.8702
412.692	177.213	412.692	83.9068
413.656	180.442	413.656	82.8726
414.62	184.869	414.62	83.9866
415.585	191.088	415.585	88.3369
416.549	199.739	416.549	96.671
417.513	210.309	417.513	108.354
418.477	218.957	418.477	119.125
419.442	219.678	419.442	122.237
420.406	211.934	420.406	116.639
421.37	201.127	421.37	107.736
422.334	191.4	422.334	99.712
423.298	184.073	423.298	93.748
424.263	179.356	424.263	89.9299
425.227	177.229	425.227	88.3492
426.191	177.533	426.191	89.211
427.155	179.958	427.155	92.6118
428.12	184.15	428.12	98.387
429.084	189.802	429.084	106.042
430.048	196.528	430.048	114.608
431.012	203.503	431.012	122.443
431.977	209.144	431.977	127.31
432.941	211.402	432.941	127.226
433.905	208.93	433.905	121.801
434.869	202.219	434.869	112.727
435.834	193.38	435.834	102.695
436.798	184.842	436.798	93.852
437.762	178.342	437.762	87.1781
438.726	174.741	438.726	82.7775
439.69	174.252	439.69	80.4325
440.655	176.585	440.655	79.9685
441.619	180.864	441.619	81.3034
442.583	185.54	442.583	84.174
443.547	188.809	443.547	87.7557
444.512	189.639	444.512	90.7252
445.476	188.457	445.476	92.004
446.44	186.598	446.44	91.4512
447.404	185.177	447.404	89.764
448.369	184.507	448.369	87.8395
449.333	184.216	449.333	86.2124
450.297	183.711	450.297	84.8743
451.261	182.647	451.261	83.5204
452.226	181.169	452.226	82.0342
453.19	179.825	453.19	80.8222
454.154	179.266	454.154	80.7022
455.118	179.944	455.118	82.3704
456.082	181.813	456.082	85.6224
457.047	184.043	457.047	88.7524
458.011	185.151	458.011	89.2666
458.975	184.06	458.975	86.2742
459.939	181.006	459.939	81.583
460.904	177.003	460.904	77.7167
461.868	172.864	461.868	75.8873
462.832	168.895	462.832	75.7205
463.796	165.062	463.796	75.8606
464.76	161.247	464.76	74.829
465.725	157.453	465.725	71.9399
466.689	153.86	466.689	67.7081
467.653	150.718	467.653	63.3463
468.618	148.202	468.618	59.8829
469.582	146.356	469.582	57.6617
470.546	145.094	470.546	56.3605
471.51	144.247	471.51	55.3272
472.474	143.615	472.474	54.0654
473.439	143.039	473.439	52.5846
474.403	142.443	474.403	51.2775
475.367	141.817	475.367	50.4697
476.331	141.18	476.331	50.1372
477.296	140.566	477.296	49.97
478.26	140.021	478.26	49.6093
479.224	139.584	479.224	48.8638
480.188	139.261	480.188	47.795
481.152	139.007	481.152	46.6502
482.117	138.739	482.117	45.7021
483.081	138.375	483.081	45.0804
484.045	137.871	484.045	44.6879
485.009	137.228	485.009	44.2674
485.974	136.465	485.974	43.5869
486.938	135.602	486.938	42.5894
487.902	134.667	487.902	41.4117
488.866	133.724	488.866	40.3012
489.831	132.874	489.831	39.5006
490.795	132.216	490.795	39.1365
491.759	131.783	491.759	39.1519
492.723	131.506	492.723	39.3234
493.688	131.238	493.688	39.3668
494.652	130.829	494.652	39.0742
495.616	130.198	495.616	38.4036
496.58	129.364	496.58	37.4738
497.545	128.439	497.545	36.4817
498.509	127.578	498.509	35.6047
499.473	126.928	499.473	34.9352
500.437	126.571	500.437	34.461
501.401	126.455	501.401	34.0883
502.366	126.397	502.366	33.7022
503.33	126.167	503.33	33.232
504.294	125.613	504.294	32.6786
505.258	124.749	505.258	32.0927
506.223	123.738	506.223	31.5312
507.187	122.8	507.187	31.0286
508.151	122.11	508.151	30.5934
509.115	121.73	509.115	30.2223
510.079	121.623	510.079	29.9149
511.044	121.703	511.044	29.6763
512.008	121.889	512.008	29.509
512.972	122.121	512.972	29.4056
513.937	122.343	513.937	29.3489
514.901	122.493	514.901	29.3187
515.865	122.514	515.865	29.3008
516.829	122.38	516.829	29.2886
517.793	122.127	517.793	29.2782
518.758	121.845	518.758	29.2622
519.722	121.626	519.722	29.2333
520.686	121.514	520.686	29.1928
521.65	121.5	521.65	29.155
522.615	121.55	522.615	29.1411
523.579	121.626	523.579	29.167
524.543	121.691	524.543	29.2297
525.507	121.711	525.507	29.301
526.471	121.655	526.471	29.3382
527.436	121.52	527.436	29.3094
528.4	121.337	528.4	29.2136
529.364	121.165	529.364	29.0789
530.328	121.065	530.328	28.9462
531.293	121.074	531.293	28.8537
532.257	121.19	532.257	28.8267
533.221	121.365	533.221	28.8702
534.185	121.53	534.185	28.967
535.15	121.63	535.15	29.0836
536.114	121.651	536.114	29.1863
537.078	121.622	537.078	29.2588
538.042	121.593	538.042	29.312
539.006	121.61	539.006	29.3787
539.971	121.691	539.971	29.4947
540.935	121.832	540.935	29.6764
541.899	122.015	541.899	29.9095
542.864	122.221	542.864	30.1538
543.828	122.436	543.828	30.36
544.792	122.643	544.792	30.4915
545.756	122.826	545.756	30.5379
546.72	122.961	546.72	30.516
547.685	123.035	547.685	30.4583
548.649	123.047	548.649	30.3969
549.613	123.015	549.613	30.3533
550.577	122.97	550.577	30.3375
551.542	122.941	551.542	30.3519
552.506	122.946	552.506	30.3955
553.47	122.986	553.47	30.4637
554.434	123.046	554.434	30.5471
555.399	123.108	555.399	30.6325
556.363	123.158	556.363	30.7079
557.327	123.195	557.327	30.7699
558.291	123.229	558.291	30.8276
559.255	123.277	559.255	30.8988
560.22	123.352	560.22	30.9993
561.184	123.456	561.184	31.1314
562.148	123.579	562.148	31.2798
563.112	123.706	563.112	31.4185
564.077	123.822	564.077	31.5249
565.041	123.919	565.041	31.5927
566.005	123.993	566.005	31.6331
566.969	124.047	566.969	31.6661
567.933	124.089	567.933	31.7069
568.898	124.126	568.898	31.7575
569.862	124.168	569.862	31.8114
570.826	124.226	570.826	31.865
571.79	124.307	571.79	31.9263
572.755	124.415	572.755	32.0107
573.719	124.548	573.719	32.1283
574.683	124.692	574.683	32.2722
575.647	124.827	575.647	32.4176
576.612	124.932	576.612	32.5353
577.576	124.992	577.576	32.6114
578.54	125.012	578.54	32.6558
579.504	125.009	579.504	32.6922
580.469	125.009	580.469	32.7389
581.433	125.033	581.433	32.7958
582.397	125.093	582.397	32.8466
583.361	125.184	583.361	32.8741
584.326	125.293	584.326	32.8753
585.29	125.399	585.29	32.8657
586.254	125.491	586.254	32.8698
587.218	125.565	587.218	32.9082
588.182	125.626	588.182	32.9886
589.147	125.685	589.147	33.1061
590.111	125.75	590.111	33.2474
591.075	125.828	591.075	33.3939
592.039	125.916	592.039	33.5243
593.004	126.005	593.004	33.6192
593.968	126.081	593.968	33.6682
594.932	126.137	594.932	33.676
595.896	126.175	595.896	33.6615
596.861	126.202	596.861	33.6505
597.825	126.234	597.825	33.6653
598.789	126.28	598.789	33.7173
599.753	126.341	599.753	33.8051
600.717	126.414	600.717	33.9202
601.682	126.496	601.682	34.0553
602.646	126.591	602.646	34.2071
603.61	126.709	603.61	34.3722
604.574	126.857	604.574	34.5413
605.539	127.029	605.539	34.6981
606.503	127.205	606.503	34.8257
607.467	127.363	607.467	34.9176
608.431	127.487	608.431	34.983
609.396	127.582	609.396	35.0429
610.36	127.669	610.36	35.118
611.324	127.766	611.324	35.2171
612.288	127.881	612.288	35.3333
613.253	128.007	613.253	35.4501
614.217	128.127	614.217	35.5525
615.181	128.232	615.181	35.6365
616.145	128.325	616.145	35.7127
617.109	128.422	617.109	35.8002
618.074	128.539	618.074	35.9159
619.038	128.674	619.038	36.0622
620.002	128.813	620.002	36.2254
620.966	128.937	620.966	36.3825
621.931	129.032	621.931	36.5114
622.895	129.101	622.895	36.5998
623.859	129.158	623.859	36.6484
624.823	129.223	624.823	36.6729
625.788	129.295	625.788	36.6864
626.752	129.367	626.752	36.7071
627.716	129.43	627.716	36.7465
628.68	129.479	628.68	36.8102
629.644	129.525	629.644	36.8979
630.609	129.586	630.609	37.0055
631.573	129.678	631.573	37.1236
632.537	129.8	632.537	37.2385
633.501	129.931	633.501	37.3345
634.466	130.037	634.466	37.4004
635.43	130.097	635.43	37.436
636.394	130.11	636.394	37.4543
637.358	130.102	637.358	37.4764
638.323	130.103	638.323	37.5212
639.287	130.136	639.287	37.5967
640.251	130.204	640.251	37.6965
641.215	130.291	641.215	37.8032
642.179	130.38	642.179	37.8962
643.144	130.459	643.144	37.9606
644.108	130.529	644.108	37.9914
645.072	130.592	645.072	37.994
646.036	130.653	646.036	37.9812
647.001	130.716	647.001	37.9713
647.965	130.786	647.965	37.9852
648.929	130.874	648.929	38.0412
649.893	130.988	649.893	38.1472
650.858	131.133	650.858	38.296
651.822	131.306	651.822	38.4677
652.786	131.493	652.786	38.6405
653.75	131.679	653.75	38.8001
654.715	131.849	654.715	38.9435
655.679	131.994	655.679	39.0741
656.643	132.109	656.643	39.1937
657.607	132.202	657.607	39.2987
658.572	132.282	658.572	39.3856
659.536	132.366	659.536	39.4621
660.5	132.466	660.5	39.5523
661.464	132.588	661.464	39.6862
662.428	132.739	662.428	39.8824
663.393	132.926	663.393	40.1386
664.357	133.153	664.357	40.4316
665.321	133.402	665.321	40.7124
666.285	133.618	666.285	40.8982
667.25	133.726	667.25	40.9022
668.214	133.72	668.214	40.7464
669.178	133.691	669.178	40.6086
670.142	133.691	670.142	40.6086
671.106	133.715	671.106	40.7104
672.071	133.776	672.071	40.8567
673.035	133.887	673.035	41.0222
673.999	134.036	673.999	41.1933
674.963	134.189	674.963	41.3565
675.928	134.307	675.928	41.5006
676.892	134.376	676.892	41.6212
677.856	134.413	677.856	41.7203
678.82	134.453	678.82	41.8029
679.785	134.526	679.785	41.8757
680.749	134.644	680.749	41.9475
681.713	134.797	681.713	42.0292
682.677	134.964	682.677	42.1326
683.641	135.125	683.641	42.2662
684.606	135.275	684.606	42.4319
685.57	135.415	685.57	42.6231
686.534	135.554	686.534	42.8267
687.499	135.696	687.499	43.0276
688.463	135.837	688.463	43.2142
689.427	135.975	689.427	43.3846
690.391	136.111	690.391	43.5455
691.355	136.252	691.355	43.7068
692.32	136.407	692.32	43.876
693.284	136.58	693.284	44.0538
694.248	136.765	694.248	44.2346
695.212	136.949	695.212	44.4108
696.177	137.117	696.177	44.5776
697.141	137.267	697.141	44.7358
698.105	137.401	698.105	44.8922
699.069	137.529	699.069	45.0556
700.034	137.655	700.034	45.2326
700.998	137.78	700.998	45.4234
701.962	137.902	701.962	45.6213
702.926	138.021	702.926	45.8151
703.89	138.146	703.89	45.995
704.855	138.284	704.855	46.1543
705.819	138.437	705.819	46.2926
706.783	138.601	706.783	46.4151
707.747	138.764	707.747	46.5294
708.712	138.917	708.712	46.6423
709.676	139.06	709.676	46.76
710.64	139.198	710.64	46.8888
711.604	139.338	711.604	47.0344
712.568	139.486	712.568	47.1997
713.533	139.637	713.533	47.3799
714.497	139.783	714.497	47.5612
715.461	140.024	715.461	47.8028
716.426	140.109	716.426	47.9166
717.39	140.171	717.39	47.9875
718.354	140.234	718.354	48.0334
719.318	140.328	719.318	48.0877
720.282	140.475	720.282	48.1842
721.247	140.676	721.247	48.3396
722.211	140.906	722.211	48.546
723.175	141.131	723.175	48.7784
724.139	141.326	724.139	49.0096
725.104	141.483	725.104	49.2218
726.068	141.609	726.068	49.4096
727.032	141.721	727.032	49.5776
727.996	141.837	727.996	49.7357
728.961	141.969	728.961	49.8931
729.925	142.122	729.925	50.054
730.889	142.293	730.889	50.2163
731.853	142.474	731.853	50.3733
732.817	142.653	732.817	50.5177
733.782	142.819	733.782	50.6465
734.746	142.964	734.746	50.7635
735.71	143.088	735.71	50.877
736.674	143.2	736.674	50.9965
737.639	143.31	737.639	51.1273
738.603	143.429	738.603	51.2702
739.567	143.565	739.567	51.422
740.531	143.718	740.531	51.5785
741.495	143.884	741.495	51.7358
742.46	144.057	742.46	51.8902
743.424	144.225	743.424	52.0386
744.388	144.38	744.388	52.1803
745.352	144.515	745.352	52.3185
746.317	144.633	746.317	52.4606
747.281	144.741	747.281	52.6149
748.245	144.854	748.245	52.7849
749.209	144.982	749.209	52.9649
750.174	145.13	750.174	53.142
751.138	145.293	751.138	53.3024
752.102	145.459	752.102	53.4399
753.066	145.615	753.066	53.5598
754.031	145.753	754.031	53.6771
754.995	145.877	754.995	53.8079
755.959	146.001	755.959	53.9615
756.923	146.141	756.923	54.1367
757.888	146.306	757.888	54.324
758.852	146.493	758.852	54.5116
759.816	146.69	759.816	54.6904
760.78	146.874	760.78	54.8566
761.744	147.031	761.744	55.0109
762.709	147.158	762.709	55.1559
763.673	147.268	763.673	55.2946
764.637	147.378	764.637	55.4297
765.601	147.504	765.601	55.5638
766.566	147.65	766.566	55.6994
767.53	147.808	767.53	55.8396
768.494	147.966	768.494	55.9872
769.458	148.114	769.458	56.144
770.423	148.252	770.423	56.3094
771.387	148.385	771.387	56.4793
772.351	148.521	772.351	56.6467
773.315	148.663	773.315	56.8036
774.279	148.809	774.279	56.9444
775.244	148.952	775.244	57.0695
776.208	149.088	776.208	57.1847
777.172	149.215	777.172	57.299
778.136	149.335	778.136	57.4195
779.101	149.454	779.101	57.5485
780.065	149.573	780.065	57.6827
781.029	149.695	781.029	57.816
781.993	149.82	781.993	57.9426
782.958	149.946	782.958	58.0599
783.922	150.069	783.922	58.1678
784.886	150.185	784.886	58.267
785.85	150.291	785.85	58.3574
786.814	150.384	786.814	58.4369
787.779	150.466	787.779	58.5034
788.743	150.537	788.743	58.5561
789.707	150.602	789.707	58.5975
790.671	150.661	790.671	58.6324
791.636	150.713	791.636	58.6653
792.6	150.755	792.6	58.6975
793.564	150.789	793.564	58.7249
794.528	150.815	794.528	58.7402
795.493	150.834	795.493	58.7366
796.457	150.848	796.457	58.7142
797.421	150.859	797.421	58.6819
798.385	150.875	798.385	58.6557
799.35	150.907	799.35	58.6519
800.314	150.963	800.314	58.6798
801.278	151.046	801.278	58.7373
802.242	151.148	802.242	58.8134
803.207	151.251	803.207	58.8948
804.171	151.339	804.171	58.9737
805.135	151.407	805.135	59.0514
806.099	151.465	806.099	59.1353
807.063	151.533	807.063	59.2316
808.028	151.626	808.028	59.338
808.992	151.748	808.992	59.4424
809.956	151.883	809.956	59.529
810.92	152.013	810.92	59.5881
811.885	152.123	811.885	59.6253
812.849	152.209	812.849	59.6619
813.813	152.285	813.813	59.7261
814.777	152.367	814.777	59.8396
815.741	152.469	815.741	60.0074
816.706	152.6	816.706	60.2165
817.67	152.761	817.67	60.4434
818.634	152.952	818.634	60.6672
819.598	153.169	819.598	60.8776
820.563	153.405	820.563	61.0761
821.527	153.647	821.527	61.2695
822.491	153.879	822.491	61.4621
823.455	154.087	823.455	61.6521
824.42	154.265	824.42	61.8338
825.384	154.423	825.384	62.0032
826.348	154.579	826.348	62.163
827.312	154.755	827.312	62.3228
828.277	154.965	828.277	62.4966
829.241	155.212	829.241	62.6978
830.205	155.488	830.205	62.9364
831.169	155.784	831.169	63.218
832.134	156.093	832.134	63.5438
833.098	156.413	833.098	63.9109
834.062	156.744	834.062	64.312
835.026	157.083	835.026	64.7341
835.99	157.423	835.99	65.1602
836.955	157.749	836.955	65.5719
837.919	158.052	837.919	65.9542
838.883	158.33	838.883	66.3005
839.847	158.592	839.847	66.6135
840.812	158.852	840.812	66.9031
841.776	159.123	841.776	67.1804
842.74	159.408	842.74	67.4514
843.704	159.695	843.704	67.7148
844.668	159.966	844.668	67.9636
845.633	160.202	845.633	68.1913
846.597	160.396	846.597	68.3975
847.561	160.555	847.561	68.5896
848.525	160.698	848.525	68.7803
849.49	160.846	849.49	68.9811
850.454	161.014	850.454	69.1965
851.418	161.206	851.418	69.4211
852.382	161.419	852.382	69.6424
853.347	161.645	853.347	69.8474
854.311	161.872	854.311	70.0293
855.275	162.092	855.275	70.1919
856.239	162.297	856.239	70.3472
857.204	162.48	857.204	70.5091
858.168	162.641	858.168	70.6844
859.132	162.784	859.132	70.8697
860.096	162.916	860.096	71.0543
861.061	163.049	861.061	71.2279
862.025	163.191	862.025	71.3873
862.989	163.344	862.989	71.5383
863.953	163.504	863.953	71.6909
864.917	163.664	864.917	71.852
865.882	163.817	865.882	72.0212
866.846	163.961	866.846	72.1908
867.81	164.097	867.81	72.351
868.774	164.225	868.774	72.4939
869.739	164.343	869.739	72.6162
870.703	164.445	870.703	72.7183
871.667	164.529	871.667	72.8036
872.631	164.594	872.631	72.8783
873.596	164.65	873.596	72.9525
874.56	164.71	874.56	73.0377
875.524	164.786	875.524	73.1428
876.488	164.879	876.488	73.2692
877.452	164.986	877.452	73.4094
878.417	165.098	878.417	73.5504
879.381	165.21	879.381	73.6809
880.345	165.32	880.345	73.7972
881.309	165.432	881.309	73.9045
882.274	165.551	882.274	74.0122
883.238	165.677	883.238	74.128
884.202	165.809	884.202	74.2534
885.166	165.94	885.166	74.385
886.131	166.066	886.131	74.5175
887.095	166.188	887.095	74.6472
888.059	166.306	888.059	74.7727
889.023	166.421	889.023	74.8938
889.987	166.531	889.987	75.0092
890.952	166.631	890.952	75.1171
891.916	166.718	891.916	75.2162
892.88	166.791	892.88	75.3083
893.844	166.856	893.844	75.3978
894.809	166.924	894.809	75.4902
895.773	167.002	895.773	75.5884
896.737	167.094	896.737	75.6905
897.701	167.196	897.701	75.7903
898.666	167.297	898.666	75.8807
899.63	167.388	899.63	75.9582
900.594	167.466	900.594	76.0257
901.558	167.536	901.558	76.0909
902.523	167.607	902.523	76.1624
903.487	167.687	903.487	76.2439
904.451	167.774	904.451	76.3321
905.415	167.864	905.415	76.4185
906.38	167.946	906.38	76.4935
907.344	168.014	907.344	76.5517
908.308	168.069	908.308	76.5931
909.272	168.114	909.272	76.6212
910.236	168.154	910.236	76.6392
911.201	168.185	911.201	76.6462
912.165	168.202	912.165	76.6371
913.129	168.193	913.129	76.6048
914.093	168.156	914.093	76.5439
915.058	168.089	915.058	76.453
916.022	167.997	916.022	76.3347
916.986	167.883	916.986	76.1928
917.95	167.746	917.95	76.0288
918.914	167.58	918.914	75.8391
919.879	167.382	919.879	75.6153
920.843	167.152	920.843	75.3477
921.807	166.897	921.807	75.0291
922.771	166.62	922.771	74.6584
923.736	166.318	923.736	74.2394
924.7	165.982	924.7	73.777
925.664	165.599	925.664	73.2727
926.628	165.158	926.628	72.7209
927.593	164.656	927.593	72.1102
928.557	164.095	928.557	71.4274
929.521	163.48	929.521	70.663
930.485	162.811	930.485	69.8173
931.449	162.087	931.449	68.9015
932.414	161.311	932.414	67.9359
933.378	160.496	933.378	66.945
934.342	159.663	934.342	65.9528
935.307	158.838	935.307	64.9805
936.271	158.047	936.271	64.0469
937.235	157.311	937.235	63.1704
938.199	156.645	938.199	62.3686
939.163	156.058	939.163	61.6568
940.128	155.556	940.128	61.0448
941.092	155.142	941.092	60.5377
942.056	154.815	942.056	60.1352
943.02	154.566	943.02	59.8314
943.985	154.378	943.985	59.6085
944.949	154.221	944.949	59.4305
945.913	154.056	945.913	59.2436
946.877	153.841	946.877	58.9904
947.841	153.552	947.841	58.6345
948.806	153.191	948.806	58.1824
949.77	152.797	949.77	57.6863
950.734	152.424	950.734	57.2214
951.698	152.121	951.698	56.8518
952.663	151.915	952.663	56.6082
953.627	151.815	953.627	56.4919
954.591	151.823	954.591	56.4997
955.555	151.953	955.555	56.6454
956.52	152.223	956.52	56.9559
957.484	152.638	957.484	57.4414
958.448	153.162	958.448	58.0614
959.412	153.713	959.412	58.7163
960.376	154.187	960.376	59.2776
961.341	154.497	961.341	59.6421
962.305	154.616	962.305	59.78
963.269	154.588	963.269	59.7482
964.234	154.51	964.234	59.6645
965.198	154.493	965.198	59.6601
966.162	154.627	966.162	59.8377
967.126	154.961	967.126	60.2518
968.09	155.504	968.09	60.9133
969.055	156.242	969.055	61.8051
970.019	157.148	970.019	62.8964
970.983	158.194	970.983	64.1507
971.947	159.344	971.947	65.5276
972.912	160.562	972.912	66.9843
973.876	161.808	973.876	68.477
974.84	163.042	974.84	69.9627
975.804	164.228	975.804	71.4017
976.769	165.339	976.769	72.7593
977.733	166.355	977.733	74.0085
978.697	167.262	978.697	75.1323
979.661	168.057	979.661	76.1245
980.625	168.741	980.625	76.9879
981.59	169.32	981.59	77.7301
982.554	169.806	982.554	78.3604
983.518	170.212	983.518	78.8884
984.482	170.554	984.482	79.3249
985.447	170.849	985.447	79.683
986.411	171.109	986.411	79.978
987.375	171.34	987.375	80.2257
988.339	171.544	988.339	80.4393
989.303	171.719	989.303	80.6279
990.268	171.862	990.268	80.7966
991.232	171.976	991.232	80.9478
992.196	172.068	992.196	81.0831
993.16	172.148	993.16	81.2039
994.125	172.225	994.125	81.3112
995.089	172.3	995.089	81.4052
996.053	172.37	996.053	81.485
997.017	172.427	997.017	81.5499
997.982	172.468	997.982	81.6005
998.946	172.492	998.946	81.6401
999.91	172.507	999.91	81.6743
1000.87	172.52	1000.87	81.7096
1001.84	172.536	1001.84	81.7506
1002.8	172.556	1002.8	81.7993
1003.77	172.577	1003.77	81.8538
1004.73	172.592	1004.73	81.9102
1005.7	172.599	1005.7	81.9638
1006.66	172.595	1006.66	82.0099
1007.62	172.578	1007.62	82.0448
1008.59	172.548	1008.59	82.0655
1009.55	172.506	1009.55	82.071
1010.52	172.453	1010.52	82.0628
1011.48	172.397	1011.48	82.0459
1012.45	172.346	1012.45	82.0274
1013.41	172.311	1013.41	82.0147
1014.37	172.296	1014.37	82.0131
1015.34	172.303	1015.34	82.0247
1016.3	172.329	1016.3	82.0482
1017.27	172.367	1017.27	82.0796
1018.23	172.412	1018.23	82.1128
1019.19	172.463	1019.19	82.1413
1020.16	172.519	1020.16	82.1593
1021.12	172.582	1021.12	82.1641
1022.09	172.651	1022.09	82.1574
1023.05	172.725	1023.05	82.1448
1024.02	172.797	1024.02	82.1326
1024.98	172.863	1024.98	82.1251
1025.94	172.92	1025.94	82.1222
1026.91	172.968	1026.91	82.1205
1027.87	173.01	1027.87	82.115
1028.84	173.047	1028.84	82.101
1029.8	173.078	1029.8	82.0743
1030.77	173.094	1030.77	82.0301
1031.73	173.084	1031.73	81.9633
1032.69	173.04	1032.69	81.8712
1033.66	172.965	1033.66	81.7558
1034.62	172.869	1034.62	81.6234
1035.59	172.769	1035.59	81.4809
1036.55	172.672	1036.55	81.3302
1037.52	172.573	1037.52	81.1649
1038.48	172.457	1038.48	80.9728
1039.44	172.305	1039.44	80.7421
1040.41	172.109	1040.41	80.4681
1041.37	171.872	1041.37	80.1544
1042.34	171.608	1042.34	79.8096
1043.3	171.327	1043.3	79.4398
1044.26	171.027	1044.26	79.045
1045.23	170.699	1045.23	78.619
1046.19	170.329	1046.19	78.1542
1047.16	169.908	1047.16	77.6462
1048.12	169.438	1048.12	77.097
1049.09	168.933	1049.09	76.5135
1050.05	168.408	1050.05	75.9043
1051.01	167.877	1051.01	75.2772
1051.98	167.346	1051.98	74.6383
1052.94	166.817	1052.94	73.9916
1053.91	166.285	1053.91	73.3409
1054.87	165.747	1054.87	72.6902
1055.84	165.202	1055.84	72.0448
1056.8	164.658	1056.8	71.4132
1057.76	164.132	1057.76	70.8063
1058.73	163.646	1058.73	70.2362
1059.69	163.215	1059.69	69.7112
1060.66	162.843	1060.66	69.2313
1061.62	162.515	1061.62	68.7851
1062.59	162.2	1062.59	68.351
1063.55	161.865	1063.55	67.9036
1064.51	161.482	1064.51	67.4212
1065.48	161.042	1065.48	66.8921
1066.44	160.548	1066.44	66.3185
1067.41	160.023	1067.41	65.7168
1068.37	159.5	1068.37	65.1173
1069.34	159.017	1069.34	64.5618
1070.3	158.615	1070.3	64.0982
1071.26	158.328	1071.26	63.7701
1072.23	158.176	1072.23	63.6019
1073.19	158.158	1073.19	63.5879
1074.16	158.246	1074.16	63.6915
1075.12	158.394	1075.12	63.8578
1076.08	158.554	1076.08	64.0347
1077.05	158.691	1077.05	64.1922
1078.01	158.792	1078.01	64.3283
1078.98	158.87	1078.98	64.4595
1079.94	158.95	1079.94	64.6039
1080.91	159.055	1080.91	64.7668
1081.87	159.194	1081.87	64.9381
1082.83	159.362	1082.83	65.1008
1083.8	159.543	1083.8	65.2446
1084.76	159.722	1084.76	65.3742
1085.73	159.893	1085.73	65.5088
1086.69	160.063	1086.69	65.6764
1087.66	160.249	1087.66	65.9047
1088.62	160.474	1088.62	66.2146
1089.58	160.76	1089.58	66.6157
1090.55	161.118	1090.55	67.1042
1091.51	161.546	1091.51	67.6648
1092.48	162.03	1092.48	68.2748
1093.44	162.548	1093.44	68.9094
1094.4	163.077	1094.4	69.5452
1095.37	163.596	1095.37	70.1614
1096.33	164.088	1096.33	70.7403
1097.3	164.541	1097.3	71.2683
1098.26	164.943	1098.26	71.7382
1099.23	165.288	1099.23	72.1505
1100.19	165.574	1100.19	72.5114
1101.15	165.804	1101.15	72.8277
1102.12	165.981	1102.12	73.0994
1103.08	166.111	1103.08	73.3179
1104.05	166.193	1104.05	73.47
1105.01	166.221	1105.01	73.5461
1105.98	166.195	1105.98	73.5474
1106.94	166.115	1106.94	73.4861
1107.9	165.989	1107.9	73.3778
1108.87	165.826	1108.87	73.2316
1109.83	165.63	1109.83	73.045
1110.8	165.402	1110.8	72.8074
1111.76	165.141	1111.76	72.511
1112.73	164.854	1112.73	72.1613
1113.69	164.556	1113.69	71.7805
1114.65	164.268	1114.65	71.3997
1115.62	164.006	1115.62	71.0453
1116.58	163.775	1116.58	70.7269
1117.55	163.561	1117.55	70.4344
1118.51	163.342	1118.51	70.145
1119.48	163.098	1119.48	69.8369
1120.44	162.82	1120.44	69.5001
1121.4	162.514	1121.4	69.1379
1122.37	162.194	1122.37	68.7608
1123.33	161.871	1123.33	68.376
1124.3	161.548	1124.3	67.9823
1125.26	161.223	1125.26	67.5726
1126.22	160.891	1126.22	67.1427
1127.19	160.553	1127.19	66.7
1128.15	160.218	1128.15	66.2652
1129.12	159.897	1129.12	65.8627
1130.08	159.596	1130.08	65.5051
1131.05	159.309	1131.05	65.1828
1132.01	159.015	1132.01	64.8651
1132.97	158.693	1132.97	64.5152
1133.94	158.329	1133.94	64.1098
1134.9	157.929	1134.9	63.6511
1135.87	157.514	1135.87	63.1658
1136.83	157.112	1136.83	62.69
1137.8	156.74	1137.8	62.2509
1138.76	156.402	1138.76	61.8551
1139.72	156.085	1139.72	61.4884
1140.69	155.773	1140.69	61.1258
1141.65	155.447	1141.65	60.7441
1142.62	155.102	1142.62	60.3309
1143.58	154.736	1143.58	59.8863
1144.55	154.356	1144.55	59.4204
1145.51	153.972	1145.51	58.9494
1146.47	153.597	1146.47	58.493
1147.44	153.248	1147.44	58.0727
1148.4	152.941	1148.4	57.7108
1149.37	152.697	1149.37	57.427
1150.33	152.527	1150.33	57.2338
1151.29	152.437	1151.29	57.1337
1152.26	152.425	1152.26	57.1202
1153.22	152.482	1153.22	57.182
1154.19	152.597	1154.19	57.3095
1155.15	152.761	1155.15	57.4971
1156.12	152.962	1156.12	57.7408
1157.08	153.191	1157.08	58.0329
1158.04	153.434	1158.04	58.3575
1159.01	153.682	1159.01	58.6934
1159.97	153.93	1159.97	59.023
1160.94	154.184	1160.94	59.3416
1161.9	154.452	1161.9	59.6612
1162.87	154.748	1162.87	60.0043
1163.83	155.076	1163.83	60.3923
1164.79	155.436	1164.79	60.8346
1165.76	155.82	1165.76	61.3259
1166.72	156.221	1166.72	61.8516
1167.69	156.638	1167.69	62.3968
1168.65	157.072	1168.65	62.9522
1169.62	157.524	1169.62	63.5138
1170.58	157.99	1170.58	64.0793
1171.54	158.456	1171.54	64.6435
1172.51	158.907	1172.51	65.199
1173.47	159.33	1173.47	65.7389
1174.44	159.722	1174.44	66.2618
1175.4	160.091	1175.4	66.7733
1176.36	160.453	1176.36	67.285
1177.33	160.825	1177.33	67.8095
1178.29	161.218	1178.29	68.3566
1179.26	161.638	1179.26	68.9303
1180.22	162.079	1180.22	69.5287
1181.19	162.536	1181.19	70.1456
1182.15	162.999	1182.15	70.7729
1183.11	163.461	1183.11	71.4027
1184.08	163.916	1184.08	72.0278
1185.04	164.361	1185.04	72.6412
1186.01	164.791	1186.01	73.2354
1186.97	165.202	1186.97	73.8021
1187.94	165.59	1187.94	74.3332
1188.9	165.946	1188.9	74.8209
1189.86	166.266	1189.86	75.2586
1190.83	166.541	1190.83	75.6419
1191.79	166.768	1191.79	75.9696
1192.76	166.947	1192.76	76.2451
1193.72	167.082	1193.72	76.476
1194.69	167.184	1194.69	76.6721
1195.65	167.261	1195.65	76.8408
1196.61	167.317	1196.61	76.9843
1197.58	167.351	1197.58	77.0987
1198.54	167.358	1198.54	77.1776
1199.51	167.298	1199.51	77.1952
1200.47	167.246	1200.47	77.2008
1201.43	167.17	1201.43	77.1784
1202.4	167.08	1202.4	77.1386
1203.36	166.983	1203.36	77.0893
1204.33	166.882	1204.33	77.0334
1205.29	166.778	1205.29	76.9689
1206.26	166.665	1206.26	76.8917
1207.22	166.541	1207.22	76.7989
1208.18	166.405	1208.18	76.6894
1209.15	166.258	1209.15	76.5628
1210.11	166.097	1210.11	76.4183
1211.08	165.924	1211.08	76.2544
1212.04	165.737	1212.04	76.0698
1213.01	165.538	1213.01	75.8649
1213.97	165.328	1213.97	75.6421
1214.93	165.11	1214.93	75.4042
1215.9	164.885	1215.9	75.1522
1216.86	164.653	1216.86	74.8839
1217.83	164.413	1217.83	74.5953
1218.79	164.166	1218.79	74.2839
1219.76	163.91	1219.76	73.9497
1220.72	163.643	1220.72	73.596
1221.68	163.361	1221.68	73.2257
1222.65	163.058	1222.65	72.8391
1223.61	162.732	1223.61	72.4323
1224.58	162.382	1224.58	71.9993
1225.54	162.015	1225.54	71.5358
1226.51	161.636	1226.51	71.0427
1227.47	161.254	1227.47	70.5265
1228.43	160.873	1228.43	69.9969
1229.4	160.493	1229.4	69.4636
1230.36	160.114	1230.36	68.9335
1231.33	159.735	1231.33	68.4112
1232.29	159.361	1232.29	67.9008
1233.25	158.996	1233.25	67.4086
1234.22	158.651	1234.22	66.944
1235.18	158.337	1235.18	66.518
1236.15	158.062	1236.15	66.1408
1237.11	157.834	1237.11	65.8201
1238.08	157.658	1238.08	65.5603
1239.04	157.534	1239.04	65.3631
1240	157.461	1240	65.2279
1240.97	157.427	1240.97	65.1486
1241.93	157.418	1241.93	65.1086
1242.9	157.407	1242.9	65.0759
1243.86	157.364	1243.86	65.0053
1244.83	157.258	1244.83	64.8492
1245.79	157.071	1245.79	64.5764
1246.75	156.806	1246.75	64.19
1247.72	156.49	1247.72	63.7345
1248.68	156.178	1248.68	63.2877
1249.65	155.933	1249.65	62.9383
1250.61	155.813	1250.61	62.7593
1251.58	155.854	1251.58	62.7868
1252.54	156.056	1252.54	63.0122
1253.5	156.393	1253.5	63.3906
1254.47	156.815	1254.47	63.8589
1255.43	157.27	1255.43	64.3553
1256.4	157.712	1256.4	64.8316
1257.36	158.11	1257.36	65.2568
1258.32	158.446	1258.32	65.6153
1259.29	158.714	1259.29	65.9057
1260.25	158.926	1260.25	66.1423
1261.22	159.107	1261.22	66.3542
1262.18	159.295	1262.18	66.5805
1263.15	159.527	1263.15	66.8595
1264.11	159.831	1264.11	67.2176
1265.07	160.22	1265.07	67.6642
1266.04	160.689	1266.04	68.1932
1267	161.225	1267	68.7903
1267.97	161.807	1267.97	69.4404
1268.93	162.417	1268.93	70.1303
1269.9	163.037	1269.9	70.8479
1270.86	163.649	1270.86	71.5781
1271.82	164.24	1271.82	72.3032
1272.79	164.801	1272.79	73.0056
1273.75	165.329	1273.75	73.6732
1274.72	165.828	1274.72	74.3011
1275.68	166.301	1275.68	74.8892
1276.65	166.747	1276.65	75.438
1277.61	167.165	1277.61	75.9456
1278.57	167.55	1278.57	76.4083
1279.54	167.898	1279.54	76.823
1280.5	168.21	1280.5	77.1906
1281.47	168.488	1281.47	77.5164
1282.43	168.735	1282.43	77.8084
1283.39	168.957	1283.39	78.0749
1284.36	169.157	1284.36	78.3218
1285.32	169.341	1285.32	78.5514
1286.29	169.512	1286.29	78.7631
1287.25	169.667	1287.25	78.9541
1288.22	169.803	1288.22	79.1213
1289.18	169.914	1289.18	79.2637
1290.14	170.003	1290.14	79.3834
1291.11	170.075	1291.11	79.4847
1292.07	170.142	1292.07	79.5725
1293.04	170.209	1293.04	79.6508
1294	170.277	1294	79.7215
1294.97	170.342	1294.97	79.7852
1295.93	170.395	1295.93	79.8419
1296.89	170.431	1296.89	79.8922
1297.86	170.452	1297.86	79.937
1298.82	170.466	1298.82	79.9773
1299.79	170.481	1299.79	80.0131
1300.75	170.501	1300.75	80.0436
1301.72	170.53	1301.72	80.0683
1302.68	170.564	1302.68	80.0875
1303.64	170.6	1303.64	80.1024
1304.61	170.636	1304.61	80.1154
1305.57	170.667	1305.57	80.129
1306.54	170.692	1306.54	80.144
1307.5	170.712	1307.5	80.1588
1308.46	170.728	1308.46	80.1692
1309.43	170.741	1309.43	80.1688
1310.39	170.75	1310.39	80.1507
1311.36	170.749	1311.36	80.1104
1312.32	170.736	1312.32	80.0483
1313.29	170.712	1313.29	79.9715
1314.25	170.684	1314.25	79.8899
1315.21	170.658	1315.21	79.8108
1316.18	170.635	1316.18	79.7342
1317.14	170.599	1317.14	79.6518
1318.11	170.531	1318.11	79.5514
1319.07	170.412	1319.07	79.4244
1320.04	170.241	1320.04	79.2703
1321	170.036	1321	79.0961
1321.96	169.821	1321.96	78.9107
1322.93	169.616	1322.93	78.7188
1323.89	169.424	1323.89	78.5202
1324.86	169.242	1324.86	78.3111
1325.82	169.057	1325.82	78.0877
1326.79	168.863	1326.79	77.8481
1327.75	168.658	1327.75	77.5931
1328.71	168.445	1328.71	77.327
1329.68	168.23	1329.68	77.058
1330.64	168.024	1330.64	76.7982
1331.61	167.837	1331.61	76.5618
1332.57	167.684	1332.57	76.3608
1333.53	167.577	1333.53	76.2006
1334.5	167.527	1334.5	76.0781
1335.46	167.532	1335.46	75.9813
1336.43	167.574	1336.43	75.8913
1337.39	167.609	1337.39	75.7846
1338.36	167.58	1338.36	75.6407
1339.32	167.446	1339.32	75.4563
1340.28	167.22	1340.28	75.2516
1341.25	166.964	1341.25	75.0556
1342.21	166.733	1342.21	74.8842
1343.18	166.553	1343.18	74.7342
1344.14	166.418	1344.14	74.593
1345.11	166.308	1345.11	74.4493
1346.07	166.207	1346.07	74.2993
1347.03	166.104	1347.03	74.1453
1348	165.997	1348	73.9897
1348.96	165.885	1348.96	73.8293
1349.93	165.763	1349.93	73.6547
1350.89	165.622	1350.89	73.4544
1351.86	165.453	1351.86	73.2201
1352.82	165.251	1352.82	72.949
1353.78	165.016	1353.78	72.6449
1354.75	164.76	1354.75	72.3186
1355.71	164.504	1355.71	71.9878
1356.68	164.273	1356.68	71.6719
1357.64	164.084	1357.64	71.3831
1358.61	163.939	1358.61	71.1186
1359.57	163.815	1359.57	70.8569
1360.53	163.668	1360.53	70.561
1361.5	163.44	1361.5	70.1935
1362.46	163.096	1362.46	69.7433
1363.43	162.656	1363.43	69.2355
1364.39	162.167	1364.39	68.6984
1365.35	161.653	1365.35	68.1281
1366.32	161.101	1366.32	67.4918
1367.28	160.487	1367.28	66.7593
1368.25	159.807	1368.25	65.9322
1369.21	159.087	1369.21	65.0484
1370.18	158.366	1370.18	64.1578
1371.14	157.67	1371.14	63.2902
1372.1	156.996	1372.1	62.4423
1373.07	156.322	1373.07	61.5942
1374.03	155.624	1374.03	60.7379
1375	154.906	1375	59.8905
1375.96	154.185	1375.96	59.0751
1376.93	153.476	1376.93	58.2978
1377.89	152.792	1377.89	57.5558
1378.85	152.156	1378.85	56.867
1379.82	151.622	1379.82	56.2841
1380.78	151.248	1380.78	55.8722
1381.75	151.069	1381.75	55.6669
1382.71	151.071	1382.71	55.6525
1383.67	151.211	1383.67	55.7807
1384.64	151.445	1384.64	56.0025
1385.6	151.728	1385.6	56.2802
1386.57	152.006	1386.57	56.5723
1387.53	152.215	1387.53	56.8248
1388.5	152.322	1388.5	56.9947
1389.46	152.345	1389.46	57.0804
1390.42	152.338	1390.42	57.1222
1391.39	152.369	1391.39	57.1867
1392.35	152.516	1392.35	57.355
1393.32	152.851	1393.32	57.7084
1394.28	153.412	1394.28	58.3016
1395.25	154.176	1395.25	59.1359
1396.21	155.072	1396.21	60.1619
1397.17	156.024	1397.17	61.3113
1398.14	156.985	1398.14	62.5194
1399.1	157.923	1399.1	63.7264
1400.07	158.821	1400.07	64.8844
1401.03	159.676	1401.03	65.9763
1402	160.51	1402	67.024
1402.96	161.356	1402.96	68.0712
1403.92	162.229	1403.92	69.1436
1404.89	163.102	1404.89	70.2121
1405.85	163.909	1405.85	71.2
1406.82	164.6	1406.82	72.0423
1407.78	165.178	1407.78	72.7397
1408.75	165.688	1408.75	73.3524
1409.71	166.184	1409.71	73.9528
1410.67	166.693	1410.67	74.5798
1411.64	167.208	1411.64	75.2191
1412.6	167.696	1412.6	75.8221
1413.57	168.134	1413.57	76.3491
1414.53	168.525	1414.53	76.7978
1415.49	168.895	1415.49	77.2011
1416.46	169.278	1416.46	77.6048
1417.42	169.675	1417.42	78.0297
1418.39	170.034	1418.39	78.4421
1419.35	170.305	1419.35	78.7825
1420.32	170.503	1420.32	79.0324
1421.28	170.668	1421.28	79.2166
1422.24	170.811	1422.24	79.3601
1423.21	170.914	1423.21	79.4723
1424.17	170.966	1424.17	79.5559
1425.14	170.975	1425.14	79.6157
1426.1	170.968	1426.1	79.6607
1427.07	170.97	1427.07	79.6998
1428.03	170.992	1428.03	79.7374
1428.99	171.025	1428.99	79.7697
1429.96	171.048	1429.96	79.7868
1430.92	171.041	1430.92	79.7778
1431.89	170.994	1431.89	79.7342
1432.85	170.905	1432.85	79.6489
1433.82	170.778	1433.82	79.5155
1434.78	170.615	1434.78	79.3328
1435.74	170.413	1435.74	79.1127
1436.71	170.186	1436.71	78.8909
1437.67	169.98	1437.67	78.7151
1438.64	169.838	1438.64	78.6062
1439.6	169.76	1439.6	78.5443
1440.56	169.71	1440.56	78.4953
1441.53	169.665	1441.53	78.437
1442.49	169.619	1442.49	78.3632
1443.46	169.582	1443.46	78.2758
1444.42	169.558	1444.42	78.1762
1445.39	169.536	1445.39	78.0625
1446.35	169.502	1446.35	77.9342
1447.31	169.445	1447.31	77.7995
1448.28	169.376	1448.28	77.6758
1449.24	169.32	1449.24	77.5772
1450.21	169.29	1450.21	77.5008
1451.17	169.276	1451.17	77.426
1452.14	169.252	1452.14	77.3288
1453.1	169.208	1453.1	77.1965
1454.06	169.168	1454.06	77.0316
1455.03	169.168	1455.03	76.828
1455.99	169.131	1455.99	76.5133
1456.96	168.799	1456.96	75.9654
1457.92	168.125	1457.92	75.2548
1458.89	167.463	1458.89	74.6385
1459.85	167.034	1459.85	74.2293
1460.81	166.823	1460.81	74.0122
1461.78	166.802	1461.78	74.0036
1462.74	167.028	1462.74	74.293
1463.71	167.572	1463.71	74.9678
1464.67	168.37	1464.67	75.9511
1465.63	169.175	1465.63	76.9392
1466.6	169.736	1466.6	77.6175
1467.56	169.966	1467.56	77.8775
1468.53	169.907	1468.53	77.773
1469.49	169.651	1469.49	77.3995
1470.46	169.311	1470.46	76.8599
1471.42	169.03	1471.42	76.3083
1472.38	168.953	1472.38	75.9936
1473.35	169.149	1473.35	76.1431
1474.31	169.566	1474.31	76.7245
1475.28	170.087	1475.28	77.4885
1476.24	170.613	1476.24	78.2229
1477.21	171.086	1477.21	78.8341
1478.17	171.474	1478.17	79.3016
1479.13	171.769	1479.13	79.6371
1480.1	171.983	1480.1	79.8685
1481.06	172.138	1481.06	80.0326
1482.03	172.265	1482.03	80.1661
1482.99	172.393	1482.99	80.2955
1483.96	172.543	1483.96	80.4325
1484.92	172.73	1484.92	80.581
1485.88	172.972	1485.88	80.7472
1486.85	173.282	1486.85	80.9423
1487.81	173.623	1487.81	81.1672
1488.78	173.877	1488.78	81.39
1489.74	173.956	1489.74	81.5716
1490.7	173.93	1490.7	81.7191
1491.67	173.926	1491.67	81.865
1492.63	173.989	1492.63	82.0241
1493.6	174.11	1493.6	82.1977
1494.56	174.287	1494.56	82.3932
1495.53	174.527	1495.53	82.6237
1496.49	174.813	1496.49	82.887
1497.45	175.077	1497.45	83.1514
1498.42	175.273	1498.42	83.3845
1499.38	175.423	1499.38	83.5858
1500.35	175.553	1500.35	83.7628
1501.31	175.638	1501.31	83.9062
1502.28	175.645	1502.28	84.0019
1503.24	175.588	1503.24	84.0547
1504.2	175.573	1504.2	84.1077
1505.17	175.797	1505.17	84.2417
1506.13	176.368	1506.13	84.4995
1507.1	176.917	1507.1	84.74
1508.06	176.97	1508.06	84.8004
1509.03	176.743	1509.03	84.7803
1509.99	176.549	1509.99	84.787
1510.95	176.425	1510.95	84.8137
1511.92	176.331	1511.92	84.8308
1512.88	176.258	1512.88	84.828
1513.85	176.229	1513.85	84.8114
1514.81	176.259	1514.81	84.7903
1515.78	176.329	1515.78	84.7682
1516.74	176.389	1516.74	84.7453
1517.7	176.402	1517.7	84.7275
1518.67	176.378	1518.67	84.7277
1519.63	176.356	1519.63	84.7558
1520.6	176.364	1520.6	84.8032
1521.56	176.396	1521.56	84.8426
1522.52	176.425	1522.52	84.8512
1523.49	176.432	1523.49	84.8284
1524.45	176.41	1524.45	84.7883
1525.42	176.36	1525.42	84.7466
1526.38	176.292	1526.38	84.7158
1527.35	176.221	1527.35	84.7045
1528.31	176.162	1528.31	84.7162
1529.27	176.127	1529.27	84.7526
1530.24	176.135	1530.24	84.8189
1531.2	176.22	1531.2	84.9218
1532.17	176.39	1532.17	85.0496
1533.13	176.587	1533.13	85.1557
1534.1	176.706	1534.1	85.1852
1535.06	176.683	1535.06	85.1223
1536.02	176.529	1536.02	84.9951
1536.99	176.335	1536.99	84.8598
1537.95	176.286	1537.95	84.8072
1538.92	176.652	1538.92	84.9624
1539.88	177.52	1539.88	85.3593
1540.85	178.302	1540.85	85.7138
1541.81	178.312	1541.81	85.7079
1542.77	177.81	1542.77	85.4735
1543.74	177.277	1543.74	85.24
1544.7	176.877	1544.7	85.0802
1545.67	176.618	1545.67	84.9906
1546.63	176.476	1546.63	84.954
1547.59	176.421	1547.59	84.9521
1548.56	176.421	1548.56	84.9657
1549.52	176.445	1549.52	84.9756
1550.49	176.469	1550.49	84.9637
1551.45	176.475	1551.45	84.9157
1552.42	176.447	1552.42	84.8236
1553.38	176.366	1553.38	84.6863
1554.34	176.226	1554.34	84.5113
1555.31	176.056	1555.31	84.3264
1556.27	175.949	1556.27	84.1994
1557.24	175.998	1557.24	84.2203
1558.2	176.069	1558.2	84.3641
1559.17	175.954	1559.17	84.4543
1560.13	175.845	1560.13	84.466
1561.09	175.909	1561.09	84.4749
1562.06	176.041	1562.06	84.4748
1563.02	176.102	1563.02	84.4308
1563.99	176.04	1563.99	84.3321
1564.95	175.882	1564.95	84.1976
1565.92	175.696	1565.92	84.0644
1566.88	175.557	1566.88	83.9704
1567.84	175.495	1567.84	83.9302
1568.81	175.476	1568.81	83.9189
1569.77	175.443	1569.77	83.8932
1570.74	175.374	1570.74	83.8305
1571.7	175.274	1571.7	83.7322
1572.66	175.153	1572.66	83.6078
1573.63	175.031	1573.63	83.4722
1574.59	174.931	1574.59	83.3431
1575.56	174.836	1575.56	83.2231
1576.52	174.689	1576.52	83.0952
1577.49	174.485	1577.49	82.9546
1578.45	174.276	1578.45	82.8125
1579.41	174.075	1579.41	82.6646
1580.38	173.859	1580.38	82.4942
1581.34	173.615	1581.34	82.2933
1582.31	173.361	1582.31	82.071
1583.27	173.126	1583.27	81.8469
1584.24	172.928	1584.24	81.6393
1585.2	172.765	1585.2	81.4564
1586.16	172.617	1586.16	81.294
1587.13	172.467	1587.13	81.1413
1588.09	172.303	1588.09	80.9865
1589.06	172.121	1589.06	80.8204
1590.02	171.926	1590.02	80.6385
1590.99	171.72	1590.99	80.4399
1591.95	171.506	1591.95	80.2255
1592.91	171.283	1592.91	79.9952
1593.88	171.039	1593.88	79.7469
1594.84	170.765	1594.84	79.4779
1595.81	170.457	1595.81	79.1892
1596.77	170.124	1596.77	78.8863
1597.73	169.785	1597.73	78.5779
1598.7	169.459	1598.7	78.2726
1599.66	169.156	1599.66	77.9761
1600.63	168.872	1600.63	77.6892
1601.59	168.594	1601.59	77.4077
1602.56	168.31	1602.56	77.1252
1603.52	168.016	1603.52	76.8366
1604.48	167.716	1604.48	76.5404
1605.45	167.418	1605.45	76.2359
1606.41	167.115	1606.41	75.9191
1607.38	166.787	1607.38	75.5814
1608.34	166.416	1608.34	75.2162
1609.31	166.001	1609.31	74.8302
1610.27	165.57	1610.27	74.4446
1611.23	165.153	1611.23	74.0812
1612.2	164.764	1612.2	73.749
1613.16	164.407	1613.16	73.4455
1614.13	164.089	1614.13	73.1604
1615.09	163.805	1615.09	72.8711
1616.06	163.522	1616.06	72.5488
1617.02	163.221	1617.02	72.1992
1617.98	162.941	1617.98	71.8725
1618.95	162.709	1618.95	71.6008
1619.91	162.503	1619.91	71.3702
1620.88	162.282	1620.88	71.1506
1621.84	162.03	1621.84	70.921
1622.8	161.752	1622.8	70.6759
1623.77	161.47	1623.77	70.4248
1624.73	161.209	1624.73	70.1846
1625.7	160.98	1625.7	69.9654
1626.66	160.779	1626.66	69.7657
1627.63	160.593	1627.63	69.58
1628.59	160.414	1628.59	69.4057
1629.55	160.236	1629.55	69.2411
1630.52	160.044	1630.52	69.0818
1631.48	159.832	1631.48	68.9282
1632.45	159.634	1632.45	68.8031
1633.41	159.549	1633.41	68.7653
1634.38	159.694	1634.38	68.883
1635.34	160.042	1635.34	69.1367
1636.3	160.362	1636.3	69.3683
1637.27	160.506	1637.27	69.4632
1638.23	160.542	1638.23	69.4628
1639.2	160.554	1639.2	69.4396
1640.16	160.56	1640.16	69.4232
1641.13	160.544	1641.13	69.4138
1642.09	160.503	1642.09	69.4086
1643.05	160.471	1643.05	69.4254
1644.02	160.541	1644.02	69.519
1644.98	160.832	1644.98	69.7654
1645.95	161.347	1645.95	70.1721
1646.91	161.861	1646.91	70.5911
1647.88	162.13	1647.88	70.8403
1648.84	162.105	1648.84	70.8814
1649.8	161.878	1649.8	70.7898
1650.77	161.612	1650.77	70.6921
1651.73	161.548	1651.73	70.7626
1652.7	161.853	1652.7	71.1275
1653.66	162.348	1653.66	71.6352
1654.62	162.787	1654.62	72.0239
1655.59	163.167	1655.59	72.2711
1656.55	163.492	1656.55	72.4427
1657.52	163.728	1657.52	72.5703
1658.48	163.875	1658.48	72.6793
1659.45	163.993	1659.45	72.8115
1660.41	164.163	1660.41	73.0162
1661.37	164.423	1661.37	73.3119
1662.34	164.727	1662.34	73.6523
1663.3	164.997	1663.3	73.9574
1664.27	165.195	1664.27	74.1835
1665.23	165.335	1665.23	74.3417
1666.2	165.465	1666.2	74.4766
1667.16	165.654	1667.16	74.6484
1668.12	165.961	1668.12	74.9059
1669.09	166.349	1669.09	75.2366
1670.05	166.684	1670.05	75.5511
1671.02	166.861	1671.02	75.7657
1671.98	166.897	1671.98	75.8792
1672.95	166.866	1672.95	75.9458
1673.91	166.846	1673.91	76.025
1674.87	166.897	1674.87	76.1588
1675.84	167.052	1675.84	76.357
1676.8	167.295	1676.8	76.5953
1677.77	167.566	1677.77	76.8312
1678.73	167.784	1678.73	77.0259
1679.69	167.896	1679.69	77.1606
1680.66	167.904	1680.66	77.2459
1681.62	167.877	1681.62	77.3232
1682.59	167.893	1682.59	77.4398
1683.55	167.951	1683.55	77.5958
1684.52	168.01	1684.52	77.7481
1685.48	168.112	1685.48	77.8899
1686.44	168.287	1686.44	78.0368
1687.41	168.48	1687.41	78.1804
1688.37	168.618	1688.37	78.2997
1689.34	168.662	1689.34	78.3814
1690.3	168.612	1690.3	78.4228
1691.27	168.49	1691.27	78.4302
1692.23	168.336	1692.23	78.4185
1693.19	168.198	1693.19	78.4097
1694.16	168.131	1694.16	78.4278
1695.12	168.16	1695.12	78.4844
1696.09	168.25	1696.09	78.562
1697.05	168.294	1697.05	78.6158
1698.02	168.187	1698.02	78.6122
1698.98	167.957	1698.98	78.5764
1699.94	167.763	1699.94	78.576
1700.91	167.745	1700.91	78.652
1701.87	167.904	1701.87	78.7858
1702.84	168.138	1702.84	78.927
1703.8	168.333	1703.8	79.0317
1704.76	168.416	1704.76	79.0808
1705.73	168.383	1705.73	79.0809
1706.69	168.281	1706.69	79.056
1707.66	168.182	1707.66	79.0331
1708.62	168.13	1708.62	79.0276
1709.59	168.124	1709.59	79.0404
1710.55	168.142	1710.55	79.0649
1711.51	168.163	1711.51	79.0961
1712.48	168.187	1712.48	79.1351
1713.44	168.232	1713.44	79.1904
1714.41	168.325	1714.41	79.2737
1715.37	168.45	1715.37	79.3811
1716.34	168.499	1716.34	79.4698
1717.3	168.393	1717.3	79.4981
1718.26	168.251	1718.26	79.5022
1719.23	168.231	1719.23	79.5454
1720.19	168.344	1720.19	79.6375
1721.16	168.511	1721.16	79.753
1722.12	168.663	1722.12	79.8695
1723.09	168.772	1723.09	79.9794
1724.05	168.849	1724.05	80.0879
1725.01	168.928	1725.01	80.2056
1725.98	169.041	1725.98	80.342
1726.94	169.204	1726.94	80.4979
1727.91	169.403	1727.91	80.6611
1728.87	169.599	1728.87	80.8113
1729.83	169.761	1729.83	80.9345
1730.8	169.893	1730.8	81.0409
1731.76	170.039	1731.76	81.1726
1732.73	170.255	1732.73	81.3801
1733.69	170.554	1733.69	81.6717
1734.66	170.922	1734.66	82.0038
1735.62	171.332	1735.62	82.3284
1736.58	171.744	1736.58	82.6227
1737.55	172.122	1737.55	82.886
1738.51	172.462	1738.51	83.1335
1739.48	172.796	1739.48	83.3845
1740.44	173.154	1740.44	83.6485
1741.41	173.547	1741.41	83.9211
1742.37	173.961	1742.37	84.1943
1743.33	174.377	1743.33	84.4652
1744.3	174.776	1744.3	84.7312
1745.26	175.139	1745.26	84.9844
1746.23	175.452	1746.23	85.2122
1747.19	175.706	1747.19	85.4026
1748.16	175.889	1748.16	85.55
1749.12	175.992	1749.12	85.6627
1750.08	176.043	1750.08	85.7669
1751.05	176.112	1751.05	85.8927
1752.01	176.251	1752.01	86.051
1752.98	176.458	1752.98	86.2309
1753.94	176.702	1753.94	86.4163
1754.9	176.955	1754.9	86.5979
1755.87	177.201	1755.87	86.7713
1756.83	177.424	1756.83	86.9315
1757.8	177.612	1757.8	87.0729
1758.76	177.763	1758.76	87.1942
1759.73	177.889	1759.73	87.3022
1760.69	178.01	1760.69	87.4085
1761.65	178.14	1761.65	87.5212
1762.62	178.281	1762.62	87.6412
1763.58	178.427	1763.58	87.7635
1764.55	178.567	1764.55	87.8822
1765.51	178.694	1765.51	87.9941
1766.48	178.811	1766.48	88.1007
1767.44	178.932	1767.44	88.2076
1768.4	179.077	1768.4	88.3211
1769.37	179.253	1769.37	88.4446
1770.33	179.447	1770.33	88.5731
1771.3	179.613	1771.3	88.6912
1772.26	179.715	1772.26	88.785
1773.23	179.775	1773.23	88.8607
1774.19	179.849	1774.19	88.9373
1775.15	179.959	1775.15	89.0226
1776.12	180.081	1776.12	89.1091
1777.08	180.187	1777.08	89.1885
1778.05	180.267	1778.05	89.2586
1779.01	180.325	1779.01	89.3195
1779.97	180.365	1779.97	89.3684
1780.94	180.385	1780.94	89.4006
1781.9	180.388	1781.9	89.418
1782.87	180.387	1782.87	89.4332
1783.83	180.405	1783.83	89.4651
1784.8	180.462	1784.8	89.5279
1785.76	180.558	1785.76	89.6217
1786.72	180.673	1786.72	89.7313
1787.69	180.775	1787.69	89.8368
1788.65	180.851	1788.65	89.9259
1789.62	180.913	1789.62	90.0014
1790.58	180.99	1790.58	90.0738
1791.55	181.088	1791.55	90.1468
1792.51	181.187	1792.51	90.2158
1793.47	181.286	1793.47	90.2833
1794.44	181.395	1794.44	90.3563
1795.4	181.501	1795.4	90.4304
1796.37	181.576	1796.37	90.4922
1797.33	181.6	1797.33	90.531
1798.3	181.58	1798.3	90.5439
1799.26	181.533	1799.26	90.5331
1800.22	181.477	1800.22	90.5056
1801.19	181.427	1801.19	90.4753
1802.15	181.399	1802.15	90.4594
1803.12	181.399	1803.12	90.4685
1804.08	181.423	1804.08	90.5017
1805.05	181.46	1805.05	90.5495
1806.01	181.504	1806.01	90.6005
1806.97	181.551	1806.97	90.6449
1807.94	181.6	1807.94	90.6754
1808.9	181.642	1808.9	90.687
1809.87	181.662	1809.87	90.6787
1810.83	181.65	1810.83	90.6562
1811.79	181.61	1811.79	90.6315
1812.76	181.56	1812.76	90.6148
1813.72	181.514	1813.72	90.6092
1814.69	181.48	1814.69	90.6111
1815.65	181.46	1815.65	90.6161
1816.62	181.456	1816.62	90.6219
1817.58	181.466	1817.58	90.6289
1818.54	181.487	1818.54	90.6377
1819.51	181.507	1819.51	90.6475
1820.47	181.518	1820.47	90.6558
1821.44	181.517	1821.44	90.6612
1822.4	181.507	1822.4	90.6654
1823.37	181.501	1823.37	90.6728
1824.33	181.508	1824.33	90.6873
1825.29	181.531	1825.29	90.7095
1826.26	181.569	1826.26	90.7354
1827.22	181.61	1827.22	90.7568
1828.19	181.636	1828.19	90.7647
1829.15	181.632	1829.15	90.7546
1830.12	181.598	1830.12	90.7331
1831.08	181.566	1831.08	90.7175
1832.04	181.564	1832.04	90.7211
1833.01	181.594	1833.01	90.7411
1833.97	181.635	1833.97	90.7646
1834.94	181.665	1834.94	90.7806
1835.9	181.678	1835.9	90.7862
1836.86	181.677	1836.86	90.7846
1837.83	181.663	1837.83	90.78
1838.79	181.634	1838.79	90.7731
1839.76	181.581	1839.76	90.7602
1840.72	181.507	1840.72	90.7395
1841.69	181.431	1841.69	90.7168
1842.65	181.386	1842.65	90.7028
1843.61	181.389	1843.61	90.7028
1844.58	181.429	1844.58	90.714
1845.54	181.49	1845.54	90.7325
1846.51	181.558	1846.51	90.7547
1847.47	181.612	1847.47	90.7725
1848.44	181.631	1848.44	90.7779
1849.4	181.61	1849.4	90.7692
1850.36	181.566	1850.36	90.7528
1851.33	181.522	1851.33	90.738
1852.29	181.493	1852.29	90.73
1853.26	181.484	1853.26	90.7275
1854.22	181.487	1854.22	90.725
1855.19	181.495	1855.19	90.7176
1856.15	181.499	1856.15	90.7043
1857.11	181.498	1857.11	90.6881
1858.08	181.49	1858.08	90.6734
1859.04	181.478	1859.04	90.6641
1860.01	181.465	1860.01	90.6624
1860.97	181.46	1860.97	90.6695
1861.93	181.469	1861.93	90.6854
1862.9	181.498	1862.9	90.7088
1863.86	181.54	1863.86	90.7364
1864.83	181.592	1864.83	90.7641
1865.79	181.645	1865.79	90.787
1866.76	181.683	1866.76	90.7955
1867.72	181.674	1867.72	90.7753
1868.68	181.596	1868.68	90.7216
1869.65	181.48	1869.65	90.6542
1870.61	181.385	1870.61	90.602
1871.58	181.338	1871.58	90.5761
1872.54	181.323	1872.54	90.5675
1873.51	181.314	1873.51	90.5622
1874.47	181.298	1874.47	90.5519
1875.43	181.276	1875.43	90.5364
1876.4	181.258	1876.4	90.5196
1877.36	181.246	1877.36	90.5059
1878.33	181.241	1878.33	90.4975
1879.29	181.24	1879.29	90.4938
1880.26	181.24	1880.26	90.4926
1881.22	181.239	1881.22	90.4911
1882.18	181.238	1882.18	90.4875
1883.15	181.235	1883.15	90.4806
1884.11	181.23	1884.11	90.4697
1885.08	181.219	1885.08	90.4537
1886.04	181.203	1886.04	90.4318
1887	181.183	1887	90.4043
1887.97	181.163	1887.97	90.3737
1888.93	181.145	1888.93	90.3454
1889.9	181.133	1889.9	90.3264
1890.86	181.131	1890.86	90.3218
1891.83	181.142	1891.83	90.3305
1892.79	181.158	1892.79	90.3452
1893.75	181.169	1893.75	90.3566
1894.72	181.166	1894.72	90.3582
1895.68	181.148	1895.68	90.3492
1896.65	181.119	1896.65	90.3343
1897.61	181.089	1897.61	90.3199
1898.58	181.067	1898.58	90.3096
1899.54	181.055	1899.54	90.3024
1900.5	181.048	1900.5	90.2954
1901.47	181.042	1901.47	90.2862
1902.43	181.034	1902.43	90.2758
1903.4	181.029	1903.4	90.2681
1904.36	181.032	1904.36	90.2676
1905.33	181.049	1905.33	90.2765
1906.29	181.079	1906.29	90.2933
1907.25	181.115	1907.25	90.313
1908.22	181.143	1908.22	90.3291
1909.18	181.15	1909.18	90.3366
1910.15	181.134	1910.15	90.3353
1911.11	181.105	1911.11	90.3292
1912.08	181.072	1912.08	90.322
1913.04	181.039	1913.04	90.3147
1914	181.002	1914	90.3056
1914.97	180.96	1914.97	90.2946
1915.93	180.922	1915.93	90.2842
1916.9	180.899	1916.9	90.2792
1917.86	180.904	1917.86	90.2844
1918.82	180.943	1918.82	90.3031
1919.79	181.011	1919.79	90.3347
1920.75	181.086	1920.75	90.3737
1921.72	181.144	1921.72	90.4117
1922.68	181.169	1922.68	90.4411
1923.65	181.158	1923.65	90.4577
1924.61	181.126	1924.61	90.4626
1925.57	181.091	1925.57	90.4597
1926.54	181.066	1926.54	90.453
1927.5	181.053	1927.5	90.4452
1928.47	181.05	1928.47	90.4378
1929.43	181.053	1929.43	90.4317
1930.4	181.06	1930.4	90.4274
1931.36	181.068	1931.36	90.4248
1932.32	181.074	1932.32	90.4243
1933.29	181.076	1933.29	90.4266
1934.25	181.073	1934.25	90.4331
1935.22	181.068	1935.22	90.4441
1936.18	181.063	1936.18	90.4573
1937.14	181.061	1937.14	90.4683
1938.11	181.06	1938.11	90.4725
1939.07	181.062	1939.07	90.4678
1940.04	181.07	1940.04	90.4569
1941	181.083	1941	90.4451
1941.97	181.096	1941.97	90.4377
1942.93	181.102	1942.93	90.4362
1943.89	181.094	1943.89	90.4384
1944.86	181.075	1944.86	90.4394
1945.82	181.044	1945.82	90.4335
1946.79	181.006	1946.79	90.4175
1947.75	180.964	1947.75	90.3921
1948.72	180.927	1948.72	90.3622
1949.68	180.902	1949.68	90.3347
1950.64	180.894	1950.64	90.3154
1951.61	180.899	1951.61	90.3067
1952.57	180.911	1952.57	90.3064
1953.54	180.92	1953.54	90.3089
1954.5	180.921	1954.5	90.3081
1955.47	180.912	1955.47	90.2998
1956.43	180.897	1956.43	90.2841
1957.39	180.88	1957.39	90.265
1958.36	180.863	1958.36	90.2476
1959.32	180.846	1959.32	90.2358
1960.29	180.83	1960.29	90.23
1961.25	180.814	1961.25	90.2277
1962.22	180.804	1962.22	90.2254
1963.18	180.804	1963.18	90.22
1964.14	180.813	1964.14	90.2107
1965.11	180.828	1965.11	90.1978
1966.07	180.838	1966.07	90.1819
1967.04	180.83	1967.04	90.1636
1968	180.803	1968	90.1441
1968.96	180.762	1968.96	90.1251
1969.93	180.72	1969.93	90.1084
1970.89	180.686	1970.89	90.0952
1971.86	180.662	1971.86	90.0859
1972.82	180.646	1972.82	90.0802
1973.79	180.635	1973.79	90.0769
1974.75	180.626	1974.75	90.0735
1975.71	180.618	1975.71	90.0681
1976.68	180.611	1976.68	90.0597
1977.64	180.606	1977.64	90.0496
1978.61	180.603	1978.61	90.0406
1979.57	180.599	1979.57	90.0346
1980.54	180.593	1980.54	90.0317
1981.5	180.588	1981.5	90.0297
1982.46	180.584	1982.46	90.0256
1983.43	180.587	1983.43	90.0183
1984.39	180.595	1984.39	90.0089
1985.36	180.606	1985.36	90.0003
1986.32	180.615	1986.32	89.9953
1987.29	180.618	1987.29	89.9947
1988.25	180.618	1988.25	89.9976
1989.21	180.617	1989.21	90.0015
1990.18	180.618	1990.18	90.003
1991.14	180.617	1991.14	89.9985
1992.11	180.609	1992.11	89.9852
1993.07	180.588	1993.07	89.963
1994.03	180.555	1994.03	89.9355
1995	180.518	1995	89.9084
1995.96	180.485	1995.96	89.8875
1996.93	180.462	1996.93	89.8765
1997.89	180.452	1997.89	89.8752
1998.86	180.451	1998.86	89.8787
1999.82	180.452	1999.82	89.8801
2000.78	180.451	2000.78	89.8739
2001.75	180.445	2001.75	89.8597
2002.71	180.436	2002.71	89.8417
2003.68	180.43	2003.68	89.8252
2004.64	180.428	2004.64	89.8135
2005.61	180.429	2005.61	89.806
2006.57	180.43	2006.57	89.7997
2007.53	180.426	2007.53	89.7921
2008.5	180.414	2008.5	89.7824
2009.46	180.395	2009.46	89.772
2010.43	180.373	2010.43	89.763
2011.39	180.353	2011.39	89.7565
2012.36	180.341	2012.36	89.7521
2013.32	180.338	2013.32	89.7486
2014.28	180.341	2014.28	89.7441
2015.25	180.342	2015.25	89.7372
2016.21	180.334	2016.21	89.7266
2017.18	180.317	2017.18	89.7127
2018.14	180.297	2018.14	89.6979
2019.1	180.283	2019.1	89.6857
2020.07	180.284	2020.07	89.6789
2021.03	180.297	2021.03	89.6781
2022	180.314	2022	89.6808
2022.96	180.324	2022.96	89.6823
2023.93	180.318	2023.93	89.678
2024.89	180.296	2024.89	89.6654
2025.85	180.265	2025.85	89.6455
2026.82	180.234	2026.82	89.6222
2027.78	180.21	2027.78	89.6002
2028.75	180.194	2028.75	89.584
2029.71	180.185	2029.71	89.5758
2030.68	180.182	2030.68	89.5763
2031.64	180.184	2031.64	89.5842
2032.6	180.193	2032.6	89.5963
2033.57	180.206	2033.57	89.6078
2034.53	180.221	2034.53	89.6134
2035.5	180.232	2035.5	89.6096
2036.46	180.237	2036.46	89.5964
2037.43	180.237	2037.43	89.5785
2038.39	180.236	2038.39	89.5636
2039.35	180.238	2039.35	89.5588
2040.32	180.242	2040.32	89.5668
2041.28	180.246	2041.28	89.5842
2042.25	180.247	2042.25	89.6038
2043.21	180.243	2043.21	89.6178
2044.17	180.237	2044.17	89.6216
2045.14	180.232	2045.14	89.6149
2046.1	180.23	2046.1	89.6
2047.07	180.231	2047.07	89.58
2048.03	180.231	2048.03	89.5581
2049	180.228	2049	89.5373
2049.96	180.22	2049.96	89.5206
2050.92	180.209	2050.92	89.5108
2051.89	180.199	2051.89	89.5085
2052.85	180.191	2052.85	89.512
2053.82	180.187	2053.82	89.5172
2054.78	180.185	2054.78	89.5196
2055.75	180.183	2055.75	89.5164
2056.71	180.181	2056.71	89.5082
2057.67	180.177	2057.67	89.498
2058.64	180.173	2058.64	89.4898
2059.6	180.171	2059.6	89.4857
2060.57	180.172	2060.57	89.4853
2061.53	180.176	2061.53	89.4859
2062.5	180.181	2062.5	89.484
2063.46	180.186	2063.46	89.4777
2064.42	180.187	2064.42	89.4678
2065.39	180.183	2065.39	89.4578
2066.35	180.174	2066.35	89.4514
2067.32	180.163	2067.32	89.4499
2068.28	180.152	2068.28	89.4514
2069.25	180.144	2069.25	89.4513
2070.21	180.139	2070.21	89.4458
2071.17	180.138	2071.17	89.4339
2072.14	180.138	2072.14	89.418
2073.1	180.136	2073.1	89.4024
2074.07	180.132	2074.07	89.3904
2075.03	180.125	2075.03	89.383
2075.99	180.117	2075.99	89.3791
2076.96	180.111	2076.96	89.377
2077.92	180.11	2077.92	89.3762
2078.89	180.114	2078.89	89.3771
2079.85	180.122	2079.85	89.3801
2080.82	180.129	2080.82	89.3848
2081.78	180.133	2081.78	89.39
2082.74	180.132	2082.74	89.3948
2083.71	180.128	2083.71	89.3993
2084.67	180.124	2084.67	89.4044
2085.64	180.124	2085.64	89.411
2086.6	180.129	2086.6	89.4186
2087.57	180.14	2087.57	89.4256
2088.53	180.155	2088.53	89.4302
2089.49	180.171	2089.49	89.4314
2090.46	180.184	2090.46	89.43
2091.42	180.192	2091.42	89.4276
2092.39	180.195	2092.39	89.4263
2093.35	180.192	2093.35	89.4273
2094.32	180.187	2094.32	89.4313
2095.28	180.182	2095.28	89.4383
2096.24	180.181	2096.24	89.4477
2097.21	180.185	2097.21	89.459
2098.17	180.195	2098.17	89.4713
2099.14	180.209	2099.14	89.4834
2100.1	180.227	2100.1	89.4945
2101.06	180.242	2101.06	89.5026
2102.03	180.252	2102.03	89.5077
2102.99	180.257	2102.99	89.5107
2103.96	180.259	2103.96	89.513
2104.92	180.26	2104.92	89.5168
2105.89	180.264	2105.89	89.5234
2106.85	180.274	2106.85	89.5327
2107.81	180.286	2107.81	89.5429
2108.78	180.298	2108.78	89.5519
2109.74	180.307	2109.74	89.5582
2110.71	180.312	2110.71	89.5624
2111.67	180.318	2111.67	89.5667
2112.64	180.329	2112.64	89.573
2113.6	180.346	2113.6	89.5821
2114.56	180.366	2114.56	89.5932
2115.53	180.38	2115.53	89.6044
2116.49	180.385	2116.49	89.6139
2117.46	180.377	2117.46	89.6212
2118.42	180.365	2118.42	89.6263
2119.39	180.355	2119.39	89.6299
2120.35	180.353	2120.35	89.6324
2121.31	180.361	2121.31	89.6342
2122.28	180.372	2122.28	89.636
2123.24	180.382	2123.24	89.6389
2124.21	180.385	2124.21	89.644
2125.17	180.385	2125.17	89.6511
2126.13	180.386	2126.13	89.659
2127.1	180.391	2127.1	89.6652
2128.06	180.4	2128.06	89.6676
2129.03	180.408	2129.03	89.6649
2129.99	180.412	2129.99	89.6573
2130.96	180.41	2130.96	89.6468
2131.92	180.405	2131.92	89.6365
2132.88	180.402	2132.88	89.6298
2133.85	180.409	2133.85	89.6294
2134.81	180.424	2134.81	89.6363
2135.78	180.446	2135.78	89.6487
2136.74	180.467	2136.74	89.6631
2137.71	180.479	2137.71	89.6752
2138.67	180.48	2138.67	89.6824
2139.63	180.472	2139.63	89.6849
2140.6	180.46	2140.6	89.6855
2141.56	180.45	2141.56	89.6883
2142.53	180.447	2142.53	89.6961
2143.49	180.452	2143.49	89.709
2144.46	180.461	2144.46	89.7246
2145.42	180.474	2145.42	89.7394
2146.38	180.487	2146.38	89.7504
2147.35	180.5	2147.35	89.7568
2148.31	180.512	2148.31	89.76
2149.28	180.524	2149.28	89.7621
2150.24	180.535	2150.24	89.7653
2151.2	180.545	2151.2	89.7707
2152.17	180.554	2152.17	89.7786
2153.13	180.564	2153.13	89.7883
2154.1	180.576	2154.1	89.7984
2155.06	180.59	2155.06	89.807
2156.03	180.604	2156.03	89.8122
2156.99	180.614	2156.99	89.8134
2157.95	180.619	2157.95	89.8113
2158.92	180.62	2158.92	89.809
2159.88	180.619	2159.88	89.8102
2160.85	180.619	2160.85	89.818
2161.81	180.621	2161.81	89.8326
2162.78	180.625	2162.78	89.851
2163.74	180.63	2163.74	89.868
2164.7	180.635	2164.7	89.8795
2165.67	180.642	2165.67	89.884
2166.63	180.651	2166.63	89.8843
2167.6	180.663	2167.6	89.8856
2168.56	180.678	2168.56	89.8925
2169.53	180.694	2169.53	89.9067
2170.49	180.71	2170.49	89.9256
2171.45	180.723	2171.45	89.9445
2172.42	180.733	2172.42	89.9593
2173.38	180.741	2173.38	89.9685
2174.35	180.746	2174.35	89.9741
2175.31	180.75	2175.31	89.9792
2176.27	180.752	2176.27	89.9857
2177.24	180.753	2177.24	89.9927
2178.2	180.754	2178.2	89.997
2179.17	180.756	2179.17	89.9958
2180.13	180.759	2180.13	89.9891
2181.1	180.764	2181.1	89.9804
2182.06	180.774	2182.06	89.9745
2183.02	180.788	2183.02	89.9751
2183.99	180.803	2183.99	89.982
2184.95	180.817	2184.95	89.9921
2185.92	180.827	2185.92	90.0012
2186.88	180.832	2186.88	90.0078
2187.85	180.832	2187.85	90.0129
2188.81	180.828	2188.81	90.0197
2189.77	180.822	2189.77	90.0296
2190.74	180.818	2190.74	90.0417
2191.7	180.817	2191.7	90.0523
2192.67	180.822	2192.67	90.0587
2193.63	180.833	2193.63	90.0608
2194.6	180.849	2194.6	90.0621
2195.56	180.867	2195.56	90.067
2196.52	180.881	2196.52	90.0781
2197.49	180.888	2197.49	90.0944
2198.45	180.887	2198.45	90.1119
2199.42	180.885	2199.42	90.1266
2200.38	180.888	2200.38	90.1369
2201.34	180.901	2201.34	90.1445
2202.31	180.924	2202.31	90.1528
2203.27	180.95	2203.27	90.1647
2204.24	180.973	2204.24	90.1807
2205.2	180.986	2205.2	90.1991
2206.17	180.99	2206.17	90.217
2207.13	180.992	2207.13	90.2321
2208.09	180.997	2208.09	90.2439
2209.06	181.011	2209.06	90.2535
2210.02	181.03	2210.02	90.2627
2210.99	181.052	2210.99	90.2733
2211.95	181.072	2211.95	90.2862
2212.92	181.088	2212.92	90.3014
2213.88	181.102	2213.88	90.3184
2214.84	181.118	2214.84	90.3368
2215.81	181.136	2215.81	90.357
2216.77	181.156	2216.77	90.3798
2217.74	181.174	2217.74	90.4056
2218.7	181.19	2218.7	90.4342
2219.67	181.203	2219.67	90.4637
2220.63	181.213	2220.63	90.491
2221.59	181.221	2221.59	90.5126
2222.56	181.227	2222.56	90.5257
2223.52	181.23	2223.52	90.5298
2224.49	181.233	2224.49	90.5268
2225.45	181.235	2225.45	90.5208
2226.41	181.241	2226.41	90.517
2227.38	181.251	2227.38	90.5199
2228.34	181.268	2228.34	90.5309
2229.31	181.288	2229.31	90.5481
2230.27	181.31	2230.27	90.5669
2231.24	181.328	2231.24	90.5824
2232.2	181.34	2232.2	90.5915
2233.16	181.343	2233.16	90.5945
2234.13	181.336	2234.13	90.5948
2235.09	181.326	2235.09	90.5963
2236.06	181.318	2236.06	90.6016
2237.02	181.318	2237.02	90.6102
2237.99	181.326	2237.99	90.6188
2238.95	181.339	2238.95	90.6236
2239.91	181.347	2239.91	90.6217
2240.88	181.346	2240.88	90.6132
2241.84	181.334	2241.84	90.6006
2242.81	181.319	2242.81	90.5881
2243.77	181.309	2243.77	90.5799
2244.74	181.31	2244.74	90.5786
2245.7	181.322	2245.7	90.5843
2246.66	181.339	2246.66	90.5945
2247.63	181.352	2247.63	90.6044
2248.59	181.356	2248.59	90.6092
2249.56	181.349	2249.56	90.6053
2250.52	181.336	2250.52	90.5925
2251.49	181.323	2251.49	90.5744
2252.45	181.312	2252.45	90.5567
2253.41	181.306	2253.41	90.5449
2254.38	181.302	2254.38	90.5414
2255.34	181.298	2255.34	90.5446
2256.31	181.292	2256.31	90.5495
2257.27	181.285	2257.27	90.5514
2258.23	181.279	2258.23	90.5482
2259.2	181.275	2259.2	90.5412
2260.16	181.275	2260.16	90.5333
2261.13	181.277	2261.13	90.5262
2262.09	181.276	2262.09	90.5189
2263.06	181.27	2263.06	90.5081
2264.02	181.256	2264.02	90.4919
2264.98	181.237	2264.98	90.472
2265.95	181.218	2265.95	90.4533
2266.91	181.203	2266.91	90.4417
2267.88	181.195	2267.88	90.4403
2268.84	181.194	2268.84	90.4478
2269.81	181.201	2269.81	90.4601
2270.77	181.215	2270.77	90.4728
2271.73	181.233	2271.73	90.4835
2272.7	181.254	2272.7	90.4921
2273.66	181.273	2273.66	90.499
2274.63	181.287	2274.63	90.5044
2275.59	181.293	2275.59	90.508
2276.56	181.296	2276.56	90.5103
2277.52	181.298	2277.52	90.5128
[truncated: 5,730 more rows]

## Sheet: Figure 1 (f)
250	0.449	-0.459	-0.001
251	0.433	-0.442	-0.001
252	0.417	-0.424	-0.001
253	0.399	-0.407	-0.001
254	0.382	-0.388	-0.001
255	0.364	-0.37	-0.001
256	0.347	-0.352	-0.001
257	0.329	-0.334	-0.001
258	0.312	-0.316	-0.001
259	0.294	-0.297	-0.001
260	0.276	-0.279	0
261	0.259	-0.261	0
262	0.243	-0.244	0
263	0.228	-0.229	-0.001
264	0.214	-0.215	-0.001
265	0.202	-0.202	-0.001
266	0.192	-0.192	-0.001
267	0.183	-0.182	-0.001
268	0.175	-0.174	-0.001
269	0.168	-0.167	-0.001
270	0.162	-0.161	-0.001
271	0.157	-0.156	-0.001
272	0.152	-0.151	-0.001
273	0.148	-0.147	0
274	0.144	-0.143	0
275	0.14	-0.138	0
276	0.136	-0.135	0
277	0.133	-0.132	0
278	0.13	-0.128	0
279	0.126	-0.125	0
280	0.124	-0.123	0
281	0.121	-0.12	-0.001
282	0.118	-0.117	-0.001
283	0.116	-0.115	-0.001
284	0.113	-0.112	-0.001
285	0.111	-0.11	-0.001
286	0.108	-0.108	-0.001
287	0.106	-0.105	-0.001
288	0.104	-0.103	-0.001
289	0.103	-0.102	-0.001
290	0.101	-0.1	-0.001
291	0.1	-0.099	0
292	0.098	-0.098	0
293	0.097	-0.097	0
294	0.097	-0.097	0.001
295	0.096	-0.096	0
296	0.095	-0.096	0
297	0.095	-0.096	0
298	0.095	-0.096	0
299	0.095	-0.096	0
300	0.095	-0.097	0
301	0.096	-0.098	0
302	0.098	-0.099	0
303	0.098	-0.1	0
304	0.1	-0.101	0
305	0.101	-0.104	0.001
306	0.103	-0.105	0
307	0.105	-0.108	0
308	0.107	-0.11	0.001
309	0.109	-0.113	0
310	0.112	-0.116	0
311	0.115	-0.119	0
312	0.118	-0.122	0
313	0.122	-0.127	0.001
314	0.125	-0.13	0
315	0.129	-0.134	0
316	0.133	-0.139	0
317	0.137	-0.143	0
318	0.142	-0.149	-0.001
319	0.146	-0.153	-0.001
320	0.151	-0.159	-0.001
321	0.156	-0.164	-0.001
322	0.161	-0.17	-0.001
323	0.166	-0.175	-0.001
324	0.171	-0.181	-0.001
325	0.177	-0.186	-0.001
326	0.182	-0.192	-0.001
327	0.188	-0.198	-0.001
328	0.193	-0.204	0
329	0.199	-0.21	0
330	0.205	-0.216	0.001
331	0.21	-0.221	0
332	0.215	-0.228	0
333	0.221	-0.234	-0.001
334	0.226	-0.24	-0.001
335	0.231	-0.245	-0.001
336	0.236	-0.25	-0.001
337	0.242	-0.256	-0.001
338	0.247	-0.261	-0.001
339	0.251	-0.266	-0.001
340	0.256	-0.271	-0.001
341	0.26	-0.276	-0.001
342	0.264	-0.279	-0.001
343	0.268	-0.284	0.001
344	0.271	-0.287	0.001
345	0.274	-0.29	-0.001
346	0.276	-0.292	-0.001
347	0.278	-0.295	-0.001
348	0.28	-0.296	-0.001
349	0.281	-0.298	-0.001
350	0.282	-0.299	-0.001
351	0.283	-0.3	-0.001
352	0.283	-0.3	-0.001
353	0.283	-0.3	-0.001
354	0.282	-0.299	-0.001
355	0.281	-0.299	0
356	0.28	-0.297	0
357	0.278	-0.296	0
358	0.277	-0.293	0
359	0.275	-0.291	0
360	0.272	-0.288	-0.001
361	0.269	-0.285	-0.001
362	0.266	-0.282	-0.001
363	0.262	-0.278	-0.001
364	0.258	-0.273	-0.001
365	0.253	-0.268	-0.001
366	0.248	-0.263	-0.001
367	0.243	-0.257	-0.001
368	0.237	-0.251	-0.001
369	0.231	-0.245	-0.001
370	0.225	-0.238	0
371	0.219	-0.231	0.001
372	0.211	-0.224	0
373	0.205	-0.217	0
374	0.198	-0.21	0
375	0.191	-0.203	-0.001
376	0.184	-0.196	-0.001
377	0.178	-0.188	-0.001
378	0.171	-0.181	-0.001
379	0.164	-0.173	-0.001
380	0.157	-0.166	-0.001
381	0.15	-0.159	-0.001
382	0.143	-0.152	-0.001
383	0.137	-0.145	-0.001
384	0.13	-0.138	-0.001
385	0.123	-0.13	0
386	0.117	-0.123	0
387	0.11	-0.116	0
388	0.103	-0.109	0
389	0.097	-0.103	0
390	0.09	-0.096	0
391	0.084	-0.089	0.001
392	0.078	-0.083	0
393	0.072	-0.077	0.001
394	0.066	-0.07	0
395	0.061	-0.065	0
396	0.056	-0.059	0
397	0.051	-0.054	0.001
398	0.047	-0.05	0
399	0.043	-0.046	0.001
400	0.039	-0.042	0.001
401	0.035	-0.038	0.001
402	0.032	-0.035	0.001
403	0.03	-0.032	0
404	0.027	-0.029	0.001
405	0.025	-0.027	0.001
406	0.023	-0.024	0
407	0.021	-0.023	0.001
408	0.019	-0.021	0
409	0.018	-0.02	0.001
410	0.017	-0.018	0.001
411	0.016	-0.017	0.001
412	0.015	-0.016	0.001
413	0.014	-0.015	0.001
414	0.013	-0.015	0.001
415	0.013	-0.014	0.001
416	0.012	-0.013	0.001
417	0.011	-0.012	0.001
418	0.011	-0.012	0.001
419	0.01	-0.011	0.001
420	0.01	-0.011	0.001
421	0.01	-0.011	0.001
422	0.009	-0.01	0.001
423	0.009	-0.01	0.001
424	0.009	-0.009	0.001
425	0.008	-0.009	0.001
426	0.008	-0.009	0.001
427	0.008	-0.009	0.001
428	0.008	-0.009	0.001
429	0.007	-0.008	0.001
430	0.007	-0.008	0.001
431	0.007	-0.008	0.001
432	0.007	-0.008	0.001
433	0.007	-0.008	0.001
434	0.006	-0.007	0.001
435	0.006	-0.007	0.001
436	0.006	-0.007	0.001
437	0.006	-0.007	0.001
438	0.006	-0.006	0.001
439	0.005	-0.006	0.001
440	0.005	-0.006	0.001
441	0.005	-0.006	0.001
442	0.005	-0.006	0.001
443	0.005	-0.006	0.001
444	0.004	-0.006	0.001
445	0.005	-0.005	0.001
446	0.004	-0.005	0.001
447	0.004	-0.005	0.001
448	0.004	-0.005	0.001
449	0.004	-0.005	0.001
450	0.004	-0.005	0.001
451	0.004	-0.005	0.001
452	0.003	-0.004	0.001
453	0.003	-0.004	0.001
454	0.003	-0.004	0.001
455	0.003	-0.004	0.001
456	0.003	-0.004	0.001
457	0.003	-0.004	0.001
458	0.003	-0.004	0.001
459	0.003	-0.003	0.001
460	0.003	-0.004	0.001
461	0.002	-0.003	0.001
462	0.002	-0.003	0.001
463	0.002	-0.003	0.001
464	0.002	-0.003	0.001
465	0.002	-0.003	0.001
466	0.002	-0.003	0.001
467	0.002	-0.003	0.001
468	0.002	-0.003	0.001
469	0.002	-0.003	0.001
470	0.002	-0.003	0.001
471	0.001	-0.002	0.001
472	0.001	-0.002	0.001
473	0.002	-0.002	0.001
474	0.001	-0.002	0.001
475	0.001	-0.002	0.001
476	0.001	-0.002	0.001
477	0.001	-0.002	0.001
478	0.001	-0.002	0.001
479	0.001	-0.002	0.001
480	0.001	-0.002	0.001
481	0.001	-0.002	0.001
482	0.001	-0.002	0.001
483	0.001	-0.002	0.001
484	0.001	-0.001	0.001
485	0	-0.001	0.001
486	0	-0.001	0.001
487	0	-0.001	0.001
488	0	-0.001	0.001
489	0	-0.001	0.001
490	0	-0.001	0.001
491	0	-0.001	0.001
492	0	-0.001	0.001
493	0	-0.001	0.001
494	0	-0.001	0.001
495	0	-0.001	0.001
496	0	-0.001	0.001
497	0	-0.001	0.001
498	0	-0.001	0.001
499	0	-0.001	0.001
500	0	-0.001	0.001
501	0	-0.001	0.001
502	0	0	0.001
503	0	0	0.001
504	-0.001	0	0.001
505	-0.001	0	0.001
506	-0.001	0	0.001
507	-0.001	0	0.001
508	-0.001	0	0.001
509	-0.001	0	0.001
510	-0.001	0	0.001
511	-0.001	0	0.001
512	-0.001	0	0.001
513	-0.001	0	0.001
514	-0.001	0	0.001
515	-0.001	0	0.001
516	-0.001	0	0.001
517	-0.001	0	0.001
518	-0.001	0	0.001
519	-0.001	0	0.001
520	-0.001	0	0.001
521	-0.001	0	0.001
522	-0.001	0	0.001
523	-0.001	0	0.001
524	-0.001	0	0.001
525	-0.001	0	0.001
526	-0.001	0	0.001
527	-0.001	0	0.001
528	-0.001	0	0.001
529	-0.001	0	0.001
530	-0.001	0	0.001
531	-0.001	0	0.001
532	-0.001	0	0.001
533	-0.001	-0.001	0.001
534	-0.001	0	0.001
535	-0.001	-0.001	0.001
536	-0.001	0	0.001
537	-0.001	0	0.001
538	-0.001	0	0.001
539	-0.001	0	0.001
540	-0.001	0	0.001
541	-0.001	0	0.001
542	-0.001	0	0.001
543	-0.001	0	0.001
544	-0.001	-0.001	0.001
545	-0.001	0	0.001
546	-0.001	-0.001	0.001
547	-0.001	0	0.001
548	-0.001	-0.001	0.001
549	-0.001	0	0.001
550	-0.001	-0.001	0.001
551	-0.001	0	0.001
552	-0.001	0	0.001
553	-0.001	-0.001	0.001
554	-0.001	-0.001	0.001
555	-0.001	-0.001	0.001
556	-0.001	-0.001	0.001
557	-0.001	-0.001	0.001
558	-0.001	-0.001	0.001
559	-0.001	-0.001	0.001
560	-0.002	-0.001	0.001
561	-0.001	-0.001	0.001
562	-0.001	-0.001	0.001
563	-0.001	-0.001	0.001
564	-0.001	-0.001	0.001
565	-0.001	-0.001	0.001
566	-0.001	-0.001	0.001
567	-0.001	-0.001	0.001
568	-0.001	-0.001	0.001
569	-0.001	-0.001	0.001
570	-0.001	-0.001	0.001
571	-0.001	-0.001	0.001
572	-0.001	-0.001	0.001
573	-0.001	-0.001	0.001
574	-0.001	-0.001	0.001
575	-0.001	-0.001	0.001
576	-0.001	-0.001	0.001
577	-0.001	-0.001	0.001
578	-0.001	-0.001	0.001
579	-0.002	-0.001	0.001
580	-0.001	-0.001	0.001
581	-0.001	-0.001	0.001
582	-0.002	-0.001	0.001
583	-0.002	-0.001	0.001
584	-0.002	-0.001	0.001
585	-0.001	-0.001	0.001
586	-0.001	-0.001	0.001
587	-0.001	-0.001	0.001
588	-0.001	-0.001	0.001
589	-0.001	-0.001	0.001
590	-0.001	-0.001	0.001
591	-0.002	-0.001	0.001
592	-0.001	-0.001	0.001
593	-0.001	-0.001	0.001
594	-0.001	-0.001	0.001
595	-0.001	-0.001	0.001
596	-0.001	-0.001	0.001
597	-0.001	-0.001	0.001
598	-0.001	-0.001	0.001
599	-0.002	-0.001	0.001
600	-0.001	-0.001	0.001
