# Supplementary material for: In-depth chiral sensing capability of C-dots in a biomimetic protein-based hydrogel: a probe for chiral recognition applications
Source: Royal Society of Chemistry journal article supplement (doi:10.1039/d5bm01508a), 2026-01-01
Supplement: d5bm01508a1.zip [file Figure 2.xlsx]

## Sheet: Figure 2 (a)
335	320	0.96755	0.98434	0.5822	0.56028
336	321	0.96552	0.98043	0.59951	0.58156
337	322	0.95943	0.97456	0.61805	0.60081
338	323	0.95335	0.9726	0.63659	0.62107
339	324	0.95132	0.96869	0.65389	0.64134
340	325	0.94726	0.96673	0.67367	0.66261
341	326	0.94726	0.96673	0.69221	0.68389
342	327	0.94523	0.96477	0.71199	0.70415
343	328	0.94118	0.9589	0.73053	0.72543
344	329	0.93915	0.96086	0.74907	0.74569
345	330	0.93915	0.9589	0.76885	0.76596
346	331	0.93712	0.95695	0.78739	0.78622
347	332	0.93712	0.9589	0.8047	0.80648
348	333	0.93915	0.95499	0.82324	0.82573
349	334	0.93712	0.95695	0.84054	0.84397
350	335	0.93915	0.95695	0.85785	0.86322
351	336	0.94118	0.9589	0.87268	0.87943
352	337	0.9432	0.9589	0.88875	0.89666
353	338	0.94726	0.96477	0.90482	0.91185
354	339	0.95335	0.96477	0.91842	0.92604
355	340	0.9574	0.97065	0.93201	0.94022
356	341	0.96349	0.97456	0.94438	0.95238
357	342	0.9716	0.97847	0.9555	0.96454
358	343	0.97972	0.98434	0.96663	0.97366
359	344	0.98783	0.98826	0.97404	0.98075
360	345	0.99189	0.99217	0.98269	0.98784
361	346	0.99594	0.99609	0.98888	0.99392
362	347	0.99797	1	0.99506	0.99696
363	348	1	0.99804	0.99506	0.99899
364	349	0.99797	0.99217	0.99876	1
365	350	0.99189	0.9863	1	1
366	351	0.98377	0.97847	1	0.99797
367	352	0.9716	0.96477	0.99876	0.99493
368	353	0.95538	0.95108	0.99629	0.99088
369	354	0.93712	0.93151	0.99135	0.98582
370	355	0.91278	0.90607	0.9864	0.97771
371	356	0.88438	0.87671	0.98022	0.9696
372	357	0.85396	0.84932	0.97281	0.95947
373	358	0.84178	0.82975	0.96415	0.94934
374	359	0.81339	0.80039	0.95426	0.93718
375	360	0.78702	0.77495	0.94314	0.92401
376	361	0.76471	0.75342	0.93201	0.90983
377	362	0.74442	0.73386	0.91718	0.89463
378	363	0.72617	0.71624	0.90358	0.87842
379	364	0.70994	0.70059	0.88628	0.85917
380	365	0.69777	0.68689	0.86897	0.83891
381	366	0.68357	0.67515	0.85043	0.81864
382	367	0.66734	0.65949	0.82942	0.79737
383	368	0.65517	0.64775	0.80964	0.77508
384	369	0.643	0.63796	0.78986	0.75177
385	370	0.63083	0.62622	0.76761	0.72847
386	371	0.61866	0.61448	0.74413	0.70314
387	372	0.60649	0.60274	0.72188	0.67781
388	373	0.59432	0.591	0.69963	0.65451
389	374	0.58418	0.58121	0.67614	0.63019
390	375	0.57201	0.56751	0.65389	0.60588
391	376	0.56187	0.55773	0.63164	0.58156
392	377	0.5497	0.54795	0.60816	0.55826
393	378	0.53753	0.5362	0.58591	0.53394
394	379	0.52738	0.52446	0.56242	0.51064
395	380	0.51724	0.51468	0.54141	0.48835
396	381	0.5071	0.50489	0.51792	0.46606
397	382	0.49696	0.49315	0.49567	0.44377
398	383	0.48682	0.48337	0.47466	0.42249
399	384	0.47667	0.47358	0.45117	0.39919
400	385	0.46653	0.4638	0.43016	0.37791
401	386	0.45639	0.45597	0.40791	0.35664
402	387	0.44828	0.44618	0.38566	0.33637
403	388	0.44016	0.43836	0.36465	0.3151
404	389	0.43002	0.42857	0.34363	0.29585
405	390	0.42191	0.42074	0.32262	0.2766
406	391	0.41379	0.41096	0.30284	0.25836
407	392	0.40568	0.40313	0.2843	0.24012
408	393	0.39757	0.3953	0.26576	0.22391
409	394	0.38945	0.38943	0.24845	0.20871
410	395	0.38134	0.3816	0.23239	0.19352
411	396	0.37728	0.37378	0.21632	0.17933
412	397	0.36917	0.36791	0.20272	0.16616
413	398	0.36105	0.36008	0.18912	0.154
414	399	0.35497	0.35421	0.17676	0.14286
415	400	0.34888	0.34834	0.16564	0.13273
416	401	0.3428	0.34247	0.15575	0.12361
417	402	0.32049	0.3229	0.14586	0.11651
418	403	0.31643	0.31703	0.13721	0.10841
419	404	0.31034	0.31115	0.12979	0.10233
420	405	0.30426	0.30724	0.12237	0.09625
421	406	0.3002	0.30333	0.11619	0.09017
422	407	0.29615	0.29746	0.11125	0.08612
423	408	0.29006	0.29354	0.10507	0.08105
424	409	0.286	0.28963	0.10136	0.07801
425	410	0.28195	0.28571	0.09765	0.07396
426	411	0.27789	0.2818	0.09271	0.07092
427	412	0.27586	0.27593	0.09023	0.0689
428	413	0.27181	0.27202	0.08653	0.06586
429	414	0.26775	0.27006	0.08405	0.06383
430	415	0.26572	0.26614	0.08158	0.06079
431	416	0.25963	0.26223	0.07911	0.05978
432	417	0.25558	0.26027	0.0754	0.05674
433	418	0.25355	0.2544	0.07293	0.05572
434	419	0.24746	0.25245	0.07169	0.0537
435	420	0.24544	0.25049	0.06922	0.05268
436	421	0.24341	0.24658	0.06799	0.05066
437	422	0.23935	0.24266	0.06551	0.04965
438	423	0.23529	0.23875	0.06428	0.04863
439	424	0.23124	0.23679	0.06304	0.04661
440	425	0.22921	0.23483	0.0618	0.04559
441	426	0.22718	0.23092	0.05933	0.04458
442	427	0.22515	0.22896	0.0581	0.04357
443	428	0.2211	0.22505	0.05686	0.04255
444	429	0.21907	0.22309	0.05562	0.04154
445	430	0.21501	0.22114	0.05439	0.04053
446	431	0.21298	0.21722	0.05315	0.03951
447	432	0.21095	0.21526	0.05192	0.0385
448	433	0.20892	0.21135	0.05068	0.03749
449	434	0.20487	0.20744	0.04944	0.03749
450	435	0.20284	0.20352	0.04944	0.03647
451	436	0.19878	0.20157	0.04821	0.03546
452	437	0.19675	0.19961	0.04697	0.03445
453	438	0.19473	0.19765	0.04574	0.03445
454	439	0.19067	0.19374	0.0445	0.03343
455	440	0.18864	0.19178	0.0445	0.03242
456	441	0.18864	0.19178	0.04326	0.03141
457	442	0.18458	0.18787	0.04203	0.03141
458	443	0.18256	0.18591	0.04079	0.0304
459	444	0.18053	0.182	0.04079	0.02938
460	445	0.1785	0.18004	0.03956	0.02938
461	446	0.17647	0.18004	0.03832	0.02837
462	447	0.17241	0.17808	0.03832	0.02736
463	448	0.17039	0.17417	0.03708	0.02736
464	449	0.16633	0.17025	0.03585	0.02634
465	450	0.16633	0.1683	0.03585	0.02533
466	451	0.1643	0.16634	0.03461	0.02533
467	452	0.16024	0.16243	0.03337	0.02432
468	453	0.15822	0.16047	0.03214	0.0233
469	454	0.15619	0.15851	0.03214	0.0233
470	455	0.15213	0.15656	0.0309	0.02229
471	456	0.1501	0.1546	0.0309	0.02229
472	457	0.14807	0.15068	0.02967	0.02128
473	458	0.14402	0.14677	0.02967	0.02128
474	459	0.14199	0.14677	0.02843	0.02026
475	460	0.13996	0.14481	0.02843	0.01925
476	461	0.13793	0.1409	0.02719	0.01925
477	462	0.13793	0.13894	0.02596	0.01824
478	463	0.1359	0.13699	0.02596	0.01824
479	464	0.13387	0.13699	0.02472	0.01722
480	465	0.13185	0.13503	0.02472	0.01722
481	466	0.12982	0.13503	0.02472	0.01722
482	467	0.12982	0.13307	0.02349	0.01621
483	468	0.12982	0.13112	0.02349	0.01621
484	469	0.12779	0.12916	0.02225	0.0152
485	470	0.12576	0.1272	0.02225	0.0152
486	471	0.12576	0.1272	0.02101	0.0152
487	472	0.1217	0.1272	0.02101	0.01418
488	473	0.11968	0.12524	0.01978	0.01418
489	474	0.11968	0.12329	0.01978	0.01317
490	475	0.11765	0.12133	0.01978	0.01317
491	476	0.11765	0.12133	0.01854	0.01317
492	477	0.11562	0.11937	0.01854	0.01216
493	478	0.11562	0.11742	0.01854	0.01216
494	479	0.11359	0.11546	0.01731	0.01216
495	480	0.11156	0.1135	0.01731	0.01114
496	481	0.10953	0.1135	0.01731	0.01114
497	482	0.10953	0.11155	0.01607	0.01114
498	483	0.10548	0.10959	0.01607	0.01013
499	484	0.10548	0.10763	0.01607	0.01013
500	485	0.10345	0.10568	0.01483	0.01013
501	486	0.10345	0.10568	0.01483	0.01013
502	487	0.10142	0.10372	0.01483	0.00912
503	488	0.09939	0.10176	0.01483	0.00912
504	489	0.09736	0.10176	0.0136	0.00912
505	490	0.09533	0.0998	0.0136	0.00811
506	491	0.09533	0.0998	0.0136	0.00811
507	492	0.09533	0.09785	0.01236	0.00811
508	493	0.09331	0.09589	0.01236	0.00811
509	494	0.09331	0.09393	0.01236	0.00811
510	495	0.09128	0.09393	0.01236	0.00709
511	496	0.08925	0.09198	0.01112	0.00709
512	497	0.08722	0.09198	0.01112	0.00709
513	498	0.08519	0.09002	0.01112	0.00709
514	499	0.08519	0.08806	0.01112	0.00709
515	500	0.08316	0.08806	0.00989	0.00608
516	501	0.08316	0.08611	0.00989	0.00608
517	502	0.08114	0.08415	0.00989	0.00608
518	503	0.07911	0.08219	0.00989	0.00608
519	504	0.07911	0.08219	0.00865	0.00608
520	505	0.07708	0.08219	0.00865	0.00507
521	506	0.07505	0.08023	0.00865	0.00507
522	507	0.07505	0.07828	0.00865	0.00507
523	508	0.07505	0.07828	0.00865	0.00507
524	509	0.07302	0.07828	0.00865	0.00507
525	510	0.07302	0.07828	0.00865	0.00507
526	511	0.07099	0.07632	0.00742	0.00507
527	512	0.07099	0.07436	0.00742	0.00405
528	513	0.06897	0.07436	0.00742	0.00405
529	514	0.06897	0.07241	0.00742	0.00405
530	515	0.06897	0.07045	0.00742	0.00405
531	516	0.06694	0.07045	0.00742	0.00405
532	517	0.06491	0.06849	0.00742	0.00405
533	518	0.06491	0.06849	0.00618	0.00405
534	519	0.06288	0.06849	0.00618	0.00405
535	520	0.06288	0.06654	0.00618	0.00405
536	521	0.06288	0.06458	0.00618	0.00304
537	522	0.08925	0.09002	0.00618	0.00304
538	523	0.08722	0.08806	0.00618	0.00304
539	524	0.08519	0.08611	0.00618	0.00304
540	525	0.08519	0.08611	0.00618	0.00304
541	526	0.08316	0.08611	0.00494	0.00304
542	527	0.08114	0.08415	0.00494	0.00304
543	528	0.08114	0.08415	0.00494	0.00304
544	529	0.08114	0.08219	0.00494	0.00304
545	530	0.08114	0.08219	0.00494	0.00304
546	531	0.07911	0.08023	0.00494	0.00304
547	532	0.07911	0.07828	0.00494	0.00304
548	533	0.07708	0.07828	0.00494	0.00203
549	534	0.07708	0.07632	0.00494	0.00203
550	535	0.07505	0.07632	0.00494	0.00203
551	536	0.07302	0.07632	0.00494	0.00203
552	537	0.07302	0.07436	0.00371	0.00203
553	538	0.07302	0.07436	0.00371	0.00203
554	539	0.07302	0.07241	0.00371	0.00203
555	540	0.07099	0.07045	0.00371	0.00203
556	541	0.07099	0.07045	0.00371	0.00101
557	542	0.06897	0.07045	0.00371	0.00203
558	543	0.06897	0.06849	0.00371	0.00203
559	544	0.06897	0.06849	0.00371	0.00101
560	545	0.06694	0.06849	0.00371	0.00101
561	546	0.06694	0.06654	0.00371	0.00101
562	547	0.06491	0.06654	0.00371	0.00101
563	548	0.06491	0.06262	0.00247	0.00101
564	549	0.06085	0.06067	0.00247	0.00101
565	550	0.06085	0.06067	0.00247	0.00101
566	551	0.06085	0.05871	0.00247	0.00101
567	552	0.05882	0.05871	0.00247	0.00101
568	553	0.05882	0.05871	0.00247	0.00101
569	554	0.05882	0.05871	0.00247	0.00101
570	555	0.05882	0.05871	0.00247	0.00101
571	556	0.06085	0.06067	0.00247	0.00101
572	557	0.06085	0.06067	0.00247	0.00101
573	558	0.05882	0.05871	0.00247	0.00101
574	559	0.05882	0.05871	0.00247	0.00101
575	560	0.05882	0.05871	0.00247	0.00101
576	561	0.05882	0.06067	0.00247	0.00101
577	562	0.05882	0.05871	0.00247	0.00101
578	563	0.05882	0.05871	0.00247	0.00101
579	564	0.0568	0.05675	0.00247	0.00101
580	565	0.05882	0.05479	0.00247	0.00101
581	566	0.0568	0.05675	0.00247	0.00101
582	567	0.05477	0.05479	0.00247	0
583	568	0.05274	0.05479	0.00124	0
584	569	0.05274	0.05284	0.00124	0
585	570	0.05274	0.05284	0.00124	0
586	571	0.05274	0.05284	0.00124	0
587	572	0.05071	0.05284	0.00124	0
588	573	0.05071	0.05088	0.00124	0
589	574	0.05071	0.05088	0.00124	0
590	575	0.04868	0.05088	0.00124	0
591	576	0.04868	0.04892	0.00124	0
592	577	0.04868	0.04892	0.00124	0
593	578	0.04665	0.04892	0.00124	0
594	579	0.04665	0.04697	0.00124	0
595	580	0.04665	0.04697	0.00124	0
596	581	0.04665	0.04697	0.00124	0
597	582	0.04462	0.04697	0.00124	0
598	583	0.04462	0.04501	0.00124	0
599	584	0.04462	0.04501	0.00124	0
600	585	0.0426	0.04305	0.00124	0
601	586	0.0426	0.04305	0.00124	0
602	587	0.04057	0.04305	0.00124	0
603	588	0.04057	0.04305	0.00124	0
604	589	0.04057	0.04305	0.00124	0
605	590	0.03854	0.0411	0.00124	0
606	591	0.03854	0.0411	0.00124	0
607	592	0.03854	0.03914	0.00124	0
608	593	0.03651	0.03914	0.00124	0
609	594	0.03651	0.03718	0.00124	0
610	595	0.03651	0.03718	0.00124	0
611	596	0.03448	0.03718	0.00124	0
612	597	0.03448	0.03523	0.00124	0
613	598	0.03245	0.03523	0.00124	0
614	599	0.03245	0.03523	0.00124	0
615	600	0.03245	0.03523	0.00124	0
616	601	0.03043	0.03327	0.00124	0
617	602	0.03043	0.03327	0.00124	0
618	603	0.03043	0.03131	0.00124	0
619	604	0.0284	0.03131	0.00124	0
620	605	0.0284	0.03131	0.00124	0
621	606	0.0284	0.03131	0.00124	0
622	607	0.0284	0.02935	0.00124	0
623	608	0.02637	0.02935	0.00124	0
624	609	0.02637	0.0274	0.00124	0
625	610	0.02434	0.0274	0.00124	0
626	611	0.02637	0.0274	0.00124	0
627	612	0.02434	0.0274	0.00124	0
628	613	0.02231	0.0274	0.00124	0
629	614	0.02637	0.0274	0.00124	0
630	615	0.02434	0.0274	0.00124	0
631	616	0.02434	0.02544	0.00124	0
632	617	0.02434	0.02544	0.00124	0
633	618	0.02231	0.02544	0.00124	0
634	619	0.02231	0.02348	0.00124	0
635	620	0.02231	0.02348	0.00124	0
636	621	0.02028	0.02348	0.00124	0
637	622	0.02028	0.02153	0.00124	0
638	623	0.01826	0.02153	0.00124	0
639	624	0.02028	0.02153	0.00124	0
640	625	0.01826	0.02153	0.00124	0
641	626	0.01623	0.02153	0.00124	0
642	627	0.01623	0.01957	0	0
643	628	0.01623	0.01957	0.00124	0
644	629	0.01623	0.01957	0	0
645	630	0.01623	0.01957	0.00124	0
646	631	0.0142	0.01761	0.00124	0
647	632	0.0142	0.01761	0.00124	0
648	633	0.0142	0.01566	0.00124	0
649	634	0.0142	0.01566	0.00124	0
650	635	0.0142	0.01566	0	0
651	636	0.0142	0.01566	0.00124	0
652	637	0.01217	0.0137	0	0
653	638	0.0142	0.0137	0	0
654	639	0.01217	0.0137	0	0
655	640	0.01217	0.0137	0	0
656	641	0.01014	0.0137	0	0
657	642	0.01014	0.01174	0	0
658	643	0.00811	0.01174	0	0
659	644	0.01014	0.0137	0	0
660	645	0.01014	0.0137	0	0
661	646	0.01014	0.01174	0	0
662	647	0.01014	0.01174	0	0
663	648	0.01014	0.01174	0	0
664	649	0.00811	0.01174	0	0
665	650	0.01014	0.01174	0.00124	0
666	651	0.01014	0.00978	0	0
667	652	0.00811	0.00978	0	0
668	653	0.00811	0.00978	0.00124	0
669	654	0.00811	0.00978	0	0
670	655	0.00811	0.00978	0	0
671	656	0.00609	0.00783	0	0
672	657	0.00609	0.00783	0	0
673	658	0.00609	0.00783	0	0
674	659	0.00609	0.00783	0	0
675	660	0.00406	0.00783	0	0
676	661	0.00609	0.00783	0	0
677	662	0.00609	0.00783	0	0
678	663	0.00406	0.00587	0	0
679	664	0.00406	0.00587	0	0
680	665	0.00406	0.00587	0	0
681	666	0.00406	0.00587	0	0
682	667	0.00406	0.00587	0	0
683	668	0.00406	0.00587	0	0
684	669	0.00406	0.00391	0	0
685	670	0.00406	0.00391	0	0
686	671	0.00203	0.00391	0	0
687	672	0.00203	0.00587	0	0
688	673	0.00406	0.00587	0	0
689	674	0.00203	0.00391	0	0
690	675	0.00203	0.00391	0	0
691	676	0.00203	0.00391	0	0
692	677	0.00203	0.00391	0	0
693	678	0.00203	0.00391	0	0
694	679	0	0.00391	0	0
695	680	0.00203	0.00196	0	0
696	681	0.00203	0.00391	0	0
697	682	0.00203	0.00196	0	0
698	683	0.00203	0.00196	0	0
699	684	0.00203	0.00391	0	0
700	685	0.00203	0.00196	0	0
701	686	0.00203	0.00196	0	0
702	687	0	0.00196	0	0
703	688	0	0.00196	0	0
704	689	0.00203	0.00196	0	0
705	690	0.00203	0.00196	0	0
706	691	0.00203	0.00196	0	0
707	692	0.00203	0.00196	0	0
708	693	0.00203	0.00196	0	0
709	694	0	0.00196	0	0
710	695	0	0.00196	0	0
711	696	0	0.00196	0	0
712	697	0.00406	0.00391	0	0
713	698	0.00203	0.00391	0	0
714	699	0.00406	0.00391	0	0
715	700	0.00406	0.00391	0	0
716	701	0.00203	0.00196	0	0
717	702	0.00203	0.00196	0	0
718	703	0.00203	0.00196	0	0
719	704	0.00203	0.00196	0	0
720	705	0.00406	0.00196	0	0
721	706	0.00406	0.00196	0	0
722	707	0.00203	0.00196	0	0
723	708	0.00203	0.00196	0	0
724	709	0.00203	0.00196	0	0
725	710	0.00203	0.00196	0	0
726	711	0.00203	0.00196	0	0
727	712	0.00203	0	0	0
728	713	0.00203	0.00196	0	0
729	714	0.00406	0	0	0
730	715	0.00203	0.00196	0	0
731	716	0.00406	0	0	0
732	717	0.00203	0.00196	0	0
733	718	0.00406	0.00196	0	0
734	719	0.00406	0.00196	0	0
735	720	0.00406	0.00196	0	0
736	721	0.00406	0.00196	0	0
737	722	0.00406	0.00196	0	0
738	723	0.00406	0.00196	0	0
739	724	0.00406	0.00196	0	0
740	725	0.00609	0.00391	0	0
741	726	0.00609	0.00391	0	0
742	727	0.00406	0.00196	0	0
743	728	0.00609	0.00391	0	0
744	729	0.00609	0.00391	0	0
745	730	0.00811	0.00391	0	0
746	731	0.00609	0.00391	0	0
747	732	0.00609	0.00391	0	0
748	733	0.00609	0.00391	0	0
749	734	0.00609	0.00391	0	0
750	735	0.00609	0.00391	0	0
751	736	0.00811	0.00391	0	0
752	737	0.00811	0.00587	0	0
753	738	0.00811	0.00391	0	0
754	739	0.00811	0.00391	0	0
755	740	0.01014	0.00391	0	0
756	741	0.01014	0.00587	0	0
757	742	0.01014	0.00587	0	0
758	743	0.01014	0.00587	0	0
759	744	0.01217	0.00587	0	0
760	745	0.01217	0.00587	0	0
761	746	0.03043	0.0137	0	0
762	747	0.03043	0.0137	0	0
763	748	0.03043	0.0137	0	0
764	749	0.03245	0.01566	0	0
765	750	0.03448	0.01566	0	0
766	751	0.03245	0.01566	0	0
767	752	0.03245	0.01566	0	0
768	753	0.03043	0.01566	0	0
769	754	0.03245	0.01566	0	0
770	755	0.03245	0.0137	0	0
771	756	0.03245	0.0137	0	0
772	757	0.03245	0.01566	0	0
773	758	0.03245	0.01761	0	0
774	759	0.03448	0.01566	0	0
775	760	0.03448	0.01566	0	0
776	761	0.03448	0.01566	0	0
777	762	0.03448	0.01761	0.00124	0
778	763	0.03448	0.01761	0	0
779	764	0.03651	0.01761	0	0
780	765	0.03651	0.01761	0	0
781	766	0.03651	0.01761	0	0
782	767	0.03651	0.01761	0	0
783	768	0.03651	0.01957	0	0
784	769	0.03651	0.01761	0	0
785	770	0.03651	0.01957	0	0
786	771	0.03854	0.01957	0	0
787	772	0.03651	0.01957	0	0
788	773	0.03854	0.02153	0	0
789	774	0.03651	0.01957	0	0
790	775	0.03854	0.02153	0	0
791	776	0.03854	0.01957	0	0
792	777	0.03854	0.01957	0	0
793	778	0.04057	0.01957	0	0
794	779	0.04057	0.01957	0	0
795	780	0.04057	0.01957	0	0
796	781	0.04057	0.01957	0	0
797	782	0.04057	0.01957	0	0
798	783	0.04057	0.02153	0	0
799	784	0.0426	0.02153	0	0
800	785	0.04057	0.02153	0	0
	786			0	0
	787			0	0
	788			0	0
	789			0	0
	790			0	0
	791			0	0
	792			0	0
	793			0	0
	794			0	0
	795			0	0
	796			0	0
	797			0	0
	798			0	0
	799			0	0
	800			0	0

## Sheet: Figure 2 (b)
290	0.3614	-0.33333	290	1	-0.99604
291	0.35789	-0.33	291	0.99459	-0.99876
292	0.35088	-0.32667	292	0.98992	-0.9953
293	0.34737	-0.32333	293	0.98303	-1
294	0.34737	-0.32333	294	0.98721	-0.99183
295	0.34386	-0.32	295	0.99164	-0.99703
296	0.34035	-0.32	296	0.99262	-0.98763
297	0.34035	-0.32	297	0.98672	-0.99084
298	0.34035	-0.32	298	0.96975	-0.99159
299	0.34035	-0.32	299	0.97959	-0.97897
300	0.34035	-0.32333	300	0.97491	-0.97847
301	0.34386	-0.32667	301	0.96901	-0.97649
302	0.35088	-0.33	302	0.9636	-0.97575
303	0.35088	-0.33333	303	0.96065	-0.96387
304	0.35789	-0.33667	304	0.94442	-0.95075
305	0.3614	-0.34667	305	0.91761	-0.92576
306	0.36842	-0.35	306	0.93999	-0.94655
307	0.37544	-0.36	307	0.87973	-0.88765
308	0.38246	-0.36667	308	0.84112	-0.84608
309	0.38947	-0.37667	309	0.80251	-0.80846
310	0.4	-0.38667	310	0.76808	-0.77481
311	0.41053	-0.39667	311	0.74225	-0.75105
312	0.42105	-0.40667	312	0.72627	-0.72977
313	0.43509	-0.42333	313	0.70733	-0.71171
314	0.44561	-0.43333	314	0.69405	-0.69983
315	0.45965	-0.44667	315	0.68101	-0.68473
316	0.47368	-0.46333	316	0.67241	-0.67731
317	0.48772	-0.47667	317	0.66626	-0.66889
318	0.50526	-0.49667	318	0.66035	-0.66592
319	0.5193	-0.51	319	0.65691	-0.66073
320	0.53684	-0.53	320	0.65421	-0.65949
321	0.55439	-0.54667	321	0.65298	-0.65801
322	0.57193	-0.56667	322	0.65248	-0.65726
323	0.58947	-0.58333	323	0.65494	-0.6585
324	0.60702	-0.60333	324	0.65421	-0.65825
325	0.62807	-0.62	325	0.65839	-0.66345
326	0.64561	-0.64	326	0.66183	-0.66543
327	0.66667	-0.66	327	0.6665	-0.6684
328	0.68421	-0.68	328	0.67142	-0.67533
329	0.70526	-0.7	329	0.67732	-0.68201
330	0.72632	-0.72	330	0.68126	-0.68671
331	0.74386	-0.73667	331	0.68839	-0.69438
332	0.7614	-0.76	332	0.69405	-0.69834
333	0.78246	-0.78	333	0.70389	-0.70601
334	0.8	-0.8	334	0.70954	-0.71393
335	0.81754	-0.81667	335	0.71618	-0.72309
336	0.83509	-0.83333	336	0.72676	-0.72705
337	0.85614	-0.85333	337	0.73414	-0.73744
338	0.87368	-0.87	338	0.74471	-0.74808
339	0.88772	-0.88667	339	0.75111	-0.75773
340	0.90526	-0.90333	340	0.76439	-0.7659
341	0.9193	-0.92	341	0.77054	-0.77431
342	0.93333	-0.93	342	0.77914	-0.7857
343	0.94737	-0.94667	343	0.79169	-0.79461
344	0.95789	-0.95667	344	0.79734	-0.80228
345	0.96842	-0.96667	345	0.81013	-0.80772
346	0.97544	-0.97333	346	0.81136	-0.81737
347	0.98246	-0.98333	347	0.82268	-0.82529
348	0.98947	-0.98667	348	0.82415	-0.82999
349	0.99298	-0.99333	349	0.83424	-0.83568
350	0.99649	-0.99667	350	0.83669	-0.84113
351	1	-1	351	0.84014	-0.84657
352	1	-1	352	0.85047	-0.85697
353	1	-1	353	0.85416	-0.86043
354	0.99649	-0.99667	354	0.85711	-0.86018
355	0.99298	-0.99667	355	0.86547	-0.86612
356	0.98947	-0.99	356	0.86449	-0.8681
357	0.98246	-0.98667	357	0.86473	-0.87652
358	0.97895	-0.97667	358	0.87309	-0.87355
359	0.97193	-0.97	359	0.87211	-0.87775
360	0.9614	-0.96	360	0.87088	-0.88072
361	0.95088	-0.95	361	0.87137	-0.878
362	0.94035	-0.94	362	0.87211	-0.8785
363	0.92632	-0.92667	363	0.86842	-0.87751
364	0.91228	-0.91	364	0.86842	-0.87379
365	0.89474	-0.89333	365	0.86203	-0.86884
366	0.87719	-0.87667	366	0.85883	-0.85994
367	0.85965	-0.85667	367	0.85071	-0.85622
368	0.8386	-0.83667	368	0.84358	-0.84929
369	0.81754	-0.81667	369	0.83817	-0.84162
370	0.79649	-0.79333	370	0.8271	-0.83321
371	0.77544	-0.77	371	0.81776	-0.82529
372	0.74737	-0.74667	372	0.80595	-0.81069
373	0.72632	-0.72333	373	0.7848	-0.79139
374	0.70175	-0.7	374	0.77521	-0.77827
375	0.67719	-0.67667	375	0.76414	-0.76862
376	0.65263	-0.65333	376	0.7516	-0.75551
377	0.63158	-0.62667	377	0.73807	-0.74462
378	0.60702	-0.60333	378	0.72627	-0.73026
379	0.58246	-0.57667	379	0.71372	-0.71839
380	0.55789	-0.55333	380	0.69921	-0.70453
381	0.53333	-0.53	381	0.68396	-0.6877
382	0.50877	-0.50667	382	0.66773	-0.67236
383	0.48772	-0.48333	383	0.65052	-0.65429
384	0.46316	-0.46	384	0.63035	-0.63474
385	0.4386	-0.43333	385	0.60944	-0.61321
386	0.41754	-0.41	386	0.58682	-0.59045
387	0.39298	-0.38667	387	0.56272	-0.5662
388	0.36842	-0.36333	388	0.53812	-0.5417
389	0.34737	-0.34333	389	0.51377	-0.51695
390	0.32281	-0.32	390	0.48697	-0.49023
391	0.30175	-0.29667	391	0.46114	-0.46375
392	0.2807	-0.27667	392	0.43556	-0.43801
393	0.25965	-0.25667	393	0.40925	-0.41203
394	0.2386	-0.23333	394	0.38367	-0.38629
395	0.22105	-0.21667	395	0.35932	-0.36179
396	0.20351	-0.19667	396	0.3362	-0.33828
397	0.18596	-0.18	397	0.31358	-0.31527
398	0.17193	-0.16667	398	0.29292	-0.29473
399	0.15789	-0.15333	399	0.27324	-0.27493
400	0.14386	-0.14	400	0.25455	-0.25588
401	0.12982	-0.12667	401	0.23783	-0.23954
402	0.1193	-0.11667	402	0.22307	-0.22445
403	0.11228	-0.10667	403	0.20905	-0.19698
404	0.10175	-0.09667	404	0.19675	-0.19772
405	0.09474	-0.09	405	0.18569	-0.18659
406	0.08772	-0.08	406	0.17511	-0.17619
407	0.0807	-0.07667	407	0.16601	-0.16704
408	0.07368	-0.07	408	0.15814	-0.15912
409	0.07018	-0.06667	409	0.15125	-0.15219
410	0.06667	-0.06	410	0.14486	-0.14576
411	0.06316	-0.05667	411	0.1392	-0.14006
412	0.05965	-0.05333	412	0.13428	-0.13512
413	0.05614	-0.05	413	0.12986	-0.13066
414	0.05263	-0.05	414	0.12592	-0.12695
415	0.05263	-0.04667	415	0.12273	-0.12348
416	0.04912	-0.04333	416	0.11977	-0.12027
417	0.04561	-0.04	417	0.11781	-0.11854
418	0.04561	-0.04	418	0.1151	-0.11581
419	0.04211	-0.03667	419	0.11289	-0.11359
420	0.04211	-0.03667	420	0.11067	-0.11136
421	0.04211	-0.03667	421	0.10871	-0.10938
422	0.0386	-0.03333	422	0.10674	-0.1074
423	0.0386	-0.03333	423	0.10502	-0.10567
424	0.0386	-0.03	424	0.1033	-0.10369
425	0.03509	-0.03	425	0.10157	-0.1022
426	0.03509	-0.03	426	0.09985	-0.10047
427	0.03509	-0.03	427	0.09838	-0.09676
428	0.03509	-0.03	428	0.0969	-0.0975
429	0.03158	-0.02667	429	0.09567	-0.09626
430	0.03158	-0.02667	430	0.0942	-0.09478
431	0.03158	-0.02667	431	0.09272	-0.09329
432	0.03158	-0.02667	432	0.09149	-0.09206
433	0.03158	-0.02667	433	0.09001	-0.09082
434	0.02807	-0.02333	434	0.08879	-0.08933
435	0.02807	-0.02333	435	0.08756	-0.0881
436	0.02807	-0.02333	436	0.08633	-0.08686
437	0.02807	-0.02333	437	0.0851	-0.08562
438	0.02807	-0.02	438	0.08387	-0.08439
439	0.02456	-0.02	439	0.08264	-0.08315
440	0.02456	-0.02	440	0.08141	-0.08191
441	0.02456	-0.02	441	0.08042	-0.08092
442	0.02456	-0.02	442	0.07919	-0.07968
443	0.02456	-0.02	443	0.07796	-0.07845
444	0.02105	-0.02	444	0.07673	-0.07721
445	0.02456	-0.01667	445	0.07575	-0.07622
446	0.02105	-0.01667	446	0.07452	-0.07498
447	0.02105	-0.01667	447	0.07354	-0.07399
448	0.02105	-0.01667	448	0.07231	-0.07275
449	0.02105	-0.01667	449	0.07132	-0.07077
450	0.02105	-0.01667	450	0.07034	-0.06954
451	0.02105	-0.01667	451	0.06911	-0.06855
452	0.01754	-0.01333	452	0.06813	-0.06756
453	0.01754	-0.01333	453	0.06714	-0.06657
454	0.01754	-0.01333	454	0.06616	-0.06558
455	0.01754	-0.01333	455	0.06517	-0.06459
456	0.01754	-0.01333	456	0.06419	-0.0636
457	0.01754	-0.01333	457	0.06321	-0.06261
458	0.01754	-0.01333	458	0.06222	-0.06162
459	0.01754	-0.01	459	0.06149	-0.06088
460	0.01754	-0.01333	460	0.0605	-0.05989
461	0.01404	-0.01	461	0.05952	-0.05914
462	0.01404	-0.01	462	0.05878	-0.0584
463	0.01404	-0.01	463	0.05804	-0.05766
464	0.01404	-0.01	464	0.05706	-0.05667
465	0.01404	-0.01	465	0.05632	-0.05593
466	0.01404	-0.01	466	0.05558	-0.05518
467	0.01404	-0.01	467	0.05485	-0.05444
468	0.01404	-0.01	468	0.05411	-0.0537
469	0.01404	-0.01	469	0.05337	-0.0532
470	0.01404	-0.01	470	0.05263	-0.05246
471	0.01053	-0.00667	471	0.05214	-0.05172
472	0.01053	-0.00667	472	0.0514	-0.05122
473	0.01404	-0.00667	473	0.05066	-0.05024
474	0.01053	-0.00667	474	0.04993	-0.04974
475	0.01053	-0.00667	475	0.04943	-0.049
476	0.01053	-0.00667	476	0.0487	-0.04826
477	0.01053	-0.00667	477	0.04796	-0.04776
478	0.01053	-0.00667	478	0.04747	-0.04776
479	0.01053	-0.00667	479	0.04673	-0.04652
480	0.01053	-0.00667	480	0.04624	-0.04578
481	0.01053	-0.00667	481	0.0455	-0.04529
482	0.01053	-0.00667	482	0.04501	-0.02945
483	0.01053	-0.00667	483	0.04427	-0.04405
484	0.01053	-0.00333	484	0.04378	-0.04355
485	0.00702	-0.00333	485	0.04329	-0.04306
486	0.00702	-0.00333	486	0.04279	-0.04232
487	0.00702	-0.00333	487	0.04206	-0.04182
488	0.00702	-0.00333	488	0.04156	-0.04133
489	0.00702	-0.00333	489	0.04107	-0.04083
490	0.00702	-0.00333	490	0.04058	-0.04034
491	0.00702	-0.00333	491	0.03984	-0.03984
492	0.00702	-0.00333	492	0.03935	-0.03935
493	0.00702	-0.00333	493	0.03886	-0.0386
494	0.00702	-0.00333	494	0.03837	-0.03811
495	0.00702	-0.00333	495	0.03788	-0.03761
496	0.00702	-0.00333	496	0.03738	-0.05345
497	0.00702	-0.00333	497	0.03689	-0.03662
498	0.00702	-0.00333	498	0.0364	-0.03613
499	0.00702	-0.00333	499	0.03591	-0.03563
500	0.00702	-0.00333	500	0.03542	-0.03514
501	0.00702	-0.00333	501	0.03492	-0.02846
502	0.00702	0	502	0.03443	-0.03415
503	0.00702	0	503	0.03394	-0.03366
504	0.00351	0	504	0.03345	-0.03316
505	0.00351	0	505	0.03296	-0.03267
506	0.00351	0	506	0.03246	-0.03069
507	0.00351	0	507	0.03197	-0.03168
508	0.00351	0	508	0.03148	-0.03118
509	0.00351	0	509	0.03099	-0.03069
510	0.00351	0	510	0.0305	-0.03019
511	0.00351	0	511	0.03	-0.03044
512	0.00351	0	512	0.02951	-0.0292
513	0.00351	0	513	0.02902	-0.02871
514	0.00351	0	514	0.02853	-0.02821
515	0.00351	0	515	0.02804	-0.02796
516	0.00351	0	516	0.02755	-0.02747
517	0.00351	0	517	0.0273	-0.02697
518	0.00351	0	518	0.02681	-0.02648
519	0.00351	0	519	0.02632	-0.02623
520	0.00351	0	520	0.02582	-0.02574
521	0.00351	0	521	0.02558	-0.02524
522	0.00351	0	522	0.02509	-0.02524
523	0.00351	0	523	0.02459	-0.02425
524	0.00351	0	524	0.0241	-0.024
525	0.00351	0	525	0.02361	-0.02351
526	0.00351	0	526	0.02336	-0.02301
527	0.00351	0	527	0.02287	-0.02252
528	0.00351	0	528	0.02238	-0.02796
529	0.00351	0	529	0.02213	-0.02178
530	0.00351	0	530	0.02164	-0.02153
531	0.00351	0	531	0.0214	-0.02103
532	0.00351	0	532	0.02091	-0.02054
533	0.00351	-0.00333	533	0.02041	-0.02029
534	0.00351	0	534	0.02017	-0.02054
535	0.00351	-0.00333	535	0.01968	-0.01955
536	0.00351	0	536	0.01943	-0.01856
537	0.00351	0	537	0.01845	-0.01806
538	0.00351	0	538	0.01795	-0.01782
539	0.00351	0	539	0.01771	-0.01806
540	0.00351	0	540	0.01722	-0.01707
541	0.00351	0	541	0.01697	-0.01658
542	0.00351	0	542	0.01648	-0.01633
543	0.00351	0	543	0.01623	-0.01584
544	0.00351	-0.00333	544	0.01574	-0.01559
545	0.00351	0	545	0.01549	-0.01534
546	0.00351	-0.00333	546	0.01525	-0.01559
547	0.00351	0	547	0.01476	-0.0146
548	0.00351	-0.00333	548	0.01451	-0.01435
549	0.00351	0	549	0.01402	-0.01386
550	0.00351	-0.00333	550	0.01377	-0.01361
551	0.00351	0	551	0.01353	-0.01336
552	0.00351	0	552	0.01303	-0.01287
553	0.00351	-0.00333	553	0.01279	-0.01262
554	0.00351	-0.00333	554	0.01254	-0.01312
555	0.00351	-0.00333	555	0.0123	-0.01188
556	0.00351	-0.00333	556	0.01205	-0.01163
557	0.00351	-0.00333	557	0.01156	-0.01138
558	0.00351	-0.00333	558	0.01131	-0.01089
559	0.00351	-0.00333	559	0.01082	-0.01064
560	0	-0.00333	560	0.01058	-0.01039
561	0.00351	-0.00333	561	0.01033	-0.01015
562	0.00351	-0.00333	562	0.01008	-0.01064
563	0.00351	-0.00333	563	0.00959	-0.00965
564	0.00351	-0.00333	564	0.00935	-0.00916
565	0.00351	-0.00333	565	0.0091	-0.00891
566	0.00351	-0.00333	566	0.00861	-0.00841
567	0.00351	-0.00333	567	0.00836	-0.00817
568	0.00351	-0.00333	568	0.00812	-0.00792
569	0.00351	-0.00333	569	0.00762	-0.00817
570	0.00351	-0.00333	570	0.00738	-0.00693
571	0.00351	-0.00333	571	0.00689	-0.00668
572	0.00351	-0.00333	572	0.00664	-0.00643
573	0.00351	-0.00333	573	0.00615	-0.00619
574	0.00351	-0.00333	574	0.0059	-0.00569
575	0.00351	-0.00333	575	0.00566	-0.00544
576	0.00351	-0.00333	576	0.00541	-0.0052
577	0.00351	-0.00333	577	0.00516	-0.00594
578	0.00351	-0.00333	578	0.00492	-0.0047
579	0	-0.00333	579	0.00467	-0.00421
580	0.00351	-0.00333	580	0.00443	-0.00396
581	0.00351	-0.00333	581	0.00394	-0.00371
582	0	-0.00333	582	0.00369	-0.00371
583	0	-0.00333	583	0.00344	-0.00346
584	0	-0.00333	584	0.00344	-0.00322
585	0.00351	-0.00333	585	0.0032	-0.00297
586	0.00351	-0.00333	586	0.00295	-0.00272
587	0.00351	-0.00333	587	0.00271	-0.00297
588	0.00351	-0.00333	588	0.00246	-0.00223
589	0.00351	-0.00333	589	0.00221	-0.00198
590	0.00351	-0.00333	590	0.00197	-0.00173
591	0	-0.00333	591	0.00172	-0.00173
592	0.00351	-0.00333	592	0.00172	-0.00148
593	0.00351	-0.00333	593	0.00148	-0.00124
594	0.00351	-0.00333	594	0.00123	-0.000989854
595	0.00351	-0.00333	595	0.000983768	-0.000989854
596	0.00351	-0.00333	596	0.000737826	-0.00074239
597	0.00351	-0.00333	597	0.000491884	-0.000494927
598	0.00351	-0.00333	598	0.000491884	-0.000247463
599	0	-0.00333	599	0.000245942	0
600	0.00351	-0.00333	600	0	0

## Sheet: Figure 2(c)
-22.2454	0	0	0	0	0	0	0	0	0	370	2.62256e-06	1.40403e-05	0.00176	0
-22.192	0	0	0	0	0	0	0	0	0	371	0	0	0.00205	0.000132858
-22.1386	0	0	0	0	0	0	0	0	0	372	7.25822e-06	1.16616e-05	0.00269	0.000308804
-22.0853	0	0	0	0	0	0	0	0	0	373	1.15333e-05	3.01667e-05	0.00323	0.000496421
-22.0319	0	0	0	0	0	0	0	0	0	374	3.20907e-05	4.22072e-05	0.00414	0.000825872
-21.9785	0	0	0	0	0	0	0	0	0	375	4.04381e-05	6.00226e-05	0.00486	0.00112
-21.9251	0	0	0	0	0	0	0	0	0	376	4.76039e-05	9.08665e-05	0.00573	0.00147
-21.8717	0	0	0	0	0	0	0	0	0	377	7.18739e-05	0.00010677	0.00681	0.00198
-21.8183	0	0	0	0	0	0	0	0	0	378	9.50579e-05	0.000128891	0.00766	0.00245
-21.7649	0	0	0	0	0	1	0	0	0	379	0.000122131	0.000192139	0.00902	0.00301
-21.7116	0	0	0	0	0	0	0	0	0	380	0.000152408	0.000247037	0.01082	0.00385
-21.6582	0	0	0	0	0	0	0	0	0	381	0.000189667	0.000296717	0.01238	0.00469
-21.6048	0	0	0	0	0	0	0	0	0	382	0.000254344	0.000424698	0.01427	0.00564
-21.5514	0	0	0	0	0	0	0	0	0	383	0.000339097	0.000524157	0.01664	0.00698
-21.498	0	0	0	0	0	0	0	0	0	384	0.000450269	0.000655179	0.01914	0.00845
-21.4446	0	0	0	0	0	0	0	0	0	385	0.000619553	0.000901501	0.02197	0.01014
-21.3912	0	0	0	0	0	0	0	0	0	386	0.000800063	0.00113	0.02565	0.01256
-21.3378	0	0	0	0	0	0	0	0	0	387	0.00101	0.00141	0.02973	0.01508
-21.2845	0	0	0	0	0	0	0	0	0	388	0.00133	0.00189	0.03368	0.01792
-21.2311	0	0	0	0	0	0	0	0	0	389	0.00174	0.00244	0.03961	0.022
-21.1777	0	0	0	0	0	0	0	0	0	390	0.00226	0.00309	0.0454	0.02613
-21.1243	0	0	0	0	0	0	0	0	0	391	0.00294	0.00403	0.05171	0.03116
-21.0709	0	0	0	0	0	0	0	0	0	392	0.00384	0.00518	0.06038	0.03777
-21.0175	0	0	0	0	0	0	0	0	0	393	0.00467	0.00628	0.06897	0.04494
-20.9641	0	0	0	0	0	0	0	0	0	394	0.0059	0.00799	0.07852	0.05303
-20.9108	0	0	0	0	0	1	0	1	0	395	0.00763	0.0101	0.09164	0.06431
-20.8574	0	0	0	0	0	0	0	0	0	396	0.00941	0.01225	0.10477	0.07576
-20.804	0	0	0	0	0	0	0	0	0	397	0.0116	0.01497	0.11767	0.08765
-20.7506	0	0	0	0	0	0	0	0	0	398	0.01454	0.01844	0.13438	0.10271
-20.6972	0	0	0	0	0	0	0	0	0	399	0.01736	0.02205	0.15218	0.11905
-20.6438	0	0	0	0	0	0	0	0	0	400	0.02124	0.02664	0.16979	0.13601
-20.5904	0	0	0	0	0	1	0	0	0	401	0.0257	0.03193	0.19136	0.15706
-20.5371	0	0	0	0	0	0	0	0	0	402	0.03029	0.03721	0.21394	0.17946
-20.4837	0	0	0	0	0	0	0	0	0	403	0.0361	0.04393	0.23505	0.20054
-20.4303	0	0	0	0	0	0	0	0	0	404	0.04289	0.05168	0.26159	0.22728
-20.3769	0	0	0	0	0	0	0	0	0	405	0.0493	0.05918	0.28711	0.25307
-20.3235	0	0	0	0	0	0	0	0	0	406	0.05761	0.06833	0.31111	0.27752
-20.2701	0	0	0	0	0	0	0	0	0	407	0.06701	0.07904	0.33968	0.30793
-20.2167	0	0	0	0	0	0	0	0	0	408	0.07594	0.08861	0.36902	0.33736
-20.1633	0	0	0	0	0	0	0	0	0	409	0.08686	0.1003	0.39352	0.36449
-20.11	0	0	0	0	0	0	0	0	0	410	0.09991	0.11404	0.42596	0.39766
-20.0566	0	0	0	0	0	0	0	0	0	411	0.11176	0.12712	0.45525	0.42942
-20.0032	0	0	0	0	0	0	0	0	0	412	0.12602	0.14184	0.48132	0.45711
-19.9498	0	0	0	0	0	0	0	0	0	413	0.14207	0.15889	0.50935	0.48653
-19.8964	0	0	0	0	0	0	0	0	0	414	0.15704	0.17458	0.54004	0.51765
-19.843	0	0	0	1	0	0	0	0	0	415	0.17414	0.19222	0.56507	0.54505
-19.7896	0	0	0	0	0	0	0	0	0	416	0.19325	0.2117	0.59485	0.5765
-19.7362	0	0	0	0	0	0	0	0	0	417	0.21099	0.22983	0.62399	0.60727
-19.6829	0	0	0	0	0	1	0	0	0	418	0.23326	0.2519	0.64907	0.63224
-19.6295	0	0	0	0	0	0	0	0	0	419	0.25686	0.27583	0.67577	0.66143
-19.5761	0	0	0	0	0	0	0	0	0	420	0.27758	0.29628	0.70143	0.68991
-19.5227	0	0	0	0	0	0	0	0	0	421	0.30063	0.31912	0.72386	0.71216
-19.4693	0	0	0	0	0	0	0	0	0	422	0.32645	0.34479	0.74909	0.73862
-19.4159	0	1	0	0	0	0	0	0	0	423	0.34782	0.36597	0.77343	0.76355
-19.3625	0	0	0	0	0	0	0	0	0	424	0.37289	0.39056	0.79326	0.78504
-19.3091	0	0	0	1	0	0	0	0	0	425	0.40181	0.41903	0.81718	0.80853
-19.2558	0	0	0	0	0	0	0	0	0	426	0.42715	0.44371	0.83746	0.8305
-19.2024	0	0	0	0	0	0	0	0	0	427	0.45346	0.47058	0.85347	0.84787
-19.149	0	0	0	0	0	0	0	0	0	428	0.48408	0.50051	0.87218	0.8649
-19.0956	0	0	0	0	0	0	0	0	0	429	0.5088	0.52465	0.88911	0.88356
-19.0422	0	0	0	0	0	0	0	0	0	430	0.53501	0.5494	0.90146	0.89581
-18.9888	0	0	0	0	0	0	0	0	0	431	0.56432	0.57849	0.916	0.91192
-18.9354	0	0	0	0	0	0	0	0	0	432	0.58957	0.60361	0.93031	0.92606
-18.8821	0	0	0	0	0	0	0	0	0	433	0.61633	0.62996	0.94095	0.93658
-18.8287	0	0	0	0	0	1	0	0	0	434	0.64573	0.65827	0.95036	0.94733
-18.7753	0	0	0	0	0	0	0	0	0	435	0.66994	0.68242	0.96057	0.95881
-18.7219	0	0	0	0	0	0	0	2	0	436	0.69515	0.70631	0.96851	0.966
-18.6685	0	0	0	0	0	0	0	0	0	437	0.72108	0.7314	0.97688	0.97528
-18.6151	0	0	0	0	0	0	0	0	0	438	0.74153	0.75218	0.98296	0.98051
-18.5617	0	0	0	0	0	0	0	0	0	439	0.76412	0.77373	0.9887	0.98717
-18.5084	0	0	0	0	0	0	0	0	0	440	0.78917	0.79749	0.99258	0.99115
-18.455	0	0	0	0	0	0	0	0	0	441	0.80889	0.81648	0.99676	0.99548
-18.4016	0	0	0	0	0	0	0	0	0	442	0.82886	0.83606	0.99853	0.99806
-18.3482	0	0	0	0	0	0	0	0	0	443	0.85045	0.85649	1	0.99831
-18.2948	0	0	0	0	0	0	0	0	0	444	0.86672	0.87322	0.99906	1
-18.2414	0	0	0	0	0	0	0	0	0	445	0.88312	0.88874	0.99993	0.99873
-18.188	0	0	0	0	0	0	0	0	0	446	0.89983	0.90482	0.99833	0.9984
-18.1347	0	0	0	0	0	0	0	0	0	447	0.91248	0.91865	0.9959	0.99442
-18.0813	0	0	0	0	0	0	0	0	0	448	0.92504	0.93097	0.99192	0.99273
-18.0279	0	0	0	0	0	0	0	0	0	449	0.9386	0.94325	0.98751	0.98738
-17.9745	0	0	0	0	0	0	0	0	0	450	0.94854	0.95248	0.98217	0.98258
-17.9211	0	0	0	0	0	0	0	0	0	451	0.95775	0.96205	0.97615	0.97703
-17.8677	0	0	0	0	0	0	0	0	0	452	0.96593	0.97052	0.96887	0.96988
-17.8143	0	0	0	0	0	0	0	0	0	453	0.97249	0.97626	0.96079	0.96141
-17.7609	0	0	0	0	0	0	0	0	0	454	0.97906	0.98129	0.95406	0.95569
-17.7076	0	0	0	0	0	0	0	0	0	455	0.98585	0.98819	0.94265	0.94417
-17.6542	0	0	0	0	0	0	0	0	0	456	0.99002	0.99209	0.93287	0.93387
-17.6008	0	0	0	1	0	0	0	0	0	457	0.99481	0.99619	0.92445	0.92584
-17.5474	0	0	0	0	0	1	0	0	0	458	0.9967	0.99798	0.91479	0.91324
-17.494	0	0	0	0	0	0	0	0	0	459	0.99941	1	0.90118	0.90199
-17.4406	0	0	0	0	0	0	0	0	0	460	0.99983	0.99946	0.89205	0.892
-17.3872	0	0	0	0	0	0	0	0	0	461	1	0.99854	0.87927	0.87923
-17.3338	0	0	0	0	0	0	0	0	0	462	0.99967	0.99799	0.86583	0.86543
-17.2805	0	0	0	0	0	0	0	0	0	463	0.99727	0.99514	0.85408	0.85394
-17.2271	0	0	0	0	0	0	0	0	0	464	0.99363	0.99076	0.84034	0.83993
-17.1737	0	0	0	0	0	0	0	1	0	465	0.99093	0.98764	0.82763	0.82657
-17.1203	0	0	0	0	0	1	0	1	0	466	0.98542	0.98338	0.81506	0.81409
-17.0669	0	0	0	1	0	0	0	0	0	467	0.9814	0.97664	0.79811	0.79866
-17.0135	0	0	0	0	0	0	0	0	0	468	0.97557	0.9713	0.78484	0.78501
-16.9601	0	0	0	0	0	0	0	0	0	469	0.96826	0.96532	0.77247	0.77178
-16.9067	0	0	0	0	0	0	0	0	0	470	0.96068	0.95654	0.75523	0.75556
-16.8534	0	0	0	0	0	0	0	0	0	471	0.9537	0.94866	0.74086	0.74002
-16.8	0	0	0	0	0	1	0	0	0	472	0.9438	0.93953	0.72844	0.72661
-16.7466	0	0	0	0	0	0	0	0	0	473	0.93439	0.93011	0.71061	0.71001
-16.6932	0	0	0	0	0	0	0	0	0	474	0.92482	0.92097	0.69571	0.6948
-16.6398	0	0	0	0	0	0	0	0	0	475	0.91529	0.90995	0.68356	0.68158
-16.5864	0	0	0	0	0	0	0	0	0	476	0.90397	0.89775	0.66551	0.66564
-16.533	0	0	0	0	0	0	0	0	0	477	0.89503	0.88767	0.65021	0.64968
-16.4797	0	0	0	0	0	0	0	0	0	478	0.88219	0.87503	0.63668	0.63555
-16.4263	0	0	0	0	0	1	0	0	0	479	0.86886	0.86155	0.61932	0.6192
-16.3729	0	0	0	0	0	0	0	1	0	480	0.85742	0.85012	0.60519	0.60465
-16.3195	0	0	0	0	0	0	0	0	0	481	0.845	0.8367	0.59262	0.59097
-16.2661	0	0	0	0	0	0	0	0	0	482	0.83078	0.82177	0.57534	0.57424
-16.2127	0	0	0	0	0	0	0	0	0	483	0.81906	0.80998	0.56065	0.56078
-16.1593	0	1	0	0	0	0	0	0	0	484	0.80448	0.79667	0.54808	0.54676
-16.1059	0	0	0	0	0	0	0	0	0	485	0.78842	0.78101	0.53143	0.53019
-16.0526	0	0	0	0	0	0	0	0	0	486	0.77553	0.76801	0.51797	0.5171
-15.9992	0	0	0	0	0	1	0	0	0	487	0.76083	0.75443	0.50488	0.50488
-15.9458	0	0	0	0	0	1	0	0	0	488	0.74541	0.73876	0.49036	0.48826
-15.8924	0	0	0	0	0	0	0	0	0	489	0.73127	0.72503	0.47747	0.47666
-15.839	0	0	0	0	0	0	0	0	0	490	0.71714	0.71048	0.46502	0.4642
-15.7856	0	0	0	0	0	0	0	0	0	491	0.70137	0.69589	0.45016	0.44915
-15.7322	0	0	0	0	0	0	0	0	0	492	0.68713	0.68211	0.43738	0.43667
-15.6789	0	0	0	0	0	1	0	0	0	493	0.67199	0.66666	0.42576	0.42408
-15.6255	0	0	0	0	0	0	0	0	0	494	0.65583	0.64989	0.41222	0.41082
-15.5721	0	0	0	0	0	0	0	0	0	495	0.64297	0.63638	0.4018	0.40042
-15.5187	0	0	0	0	0	0	0	0	0	496	0.62782	0.6208	0.39038	0.38855
-15.4653	0	0	0	0	0	0	0	0	0	497	0.61276	0.60626	0.37826	0.37697
-15.4119	0	0	0	0	0	0	0	0	0	498	0.59931	0.59284	0.36883	0.36664
-15.3585	0	0	0	0	0	1	0	1	0	499	0.585	0.57871	0.35698	0.35629
-15.3051	0	0	0	0	0	0	0	0	0	500	0.5685	0.56214	0.34632	0.34523
-15.2518	0	0	0	0	0	0	0	0	0	501	0.55554	0.54904	0.33679	0.33575
-15.1984	0	0	0	0	0	0	0	0	0	502	0.54069	0.53582	0.32732	0.32641
-15.145	0	0	0	0	0	1	0	0	0	503	0.52585	0.51988	0.31684	0.31533
-15.0916	0	0	0	0	0	0	0	0	0	504	0.51349	0.5074	0.30931	0.30748
-15.0382	0	0	0	0	0	0	0	0	0	505	0.49891	0.49348	0.29976	0.29884
-14.9848	0	0	0	0	0	0	0	0	0	506	0.48464	0.47945	0.28948	0.28815
-14.9314	0	0	0	0	0	0	0	1	0	507	0.47297	0.46734	0.28224	0.28136
-14.8781	0	0	0	0	0	0	0	0	0	508	0.45898	0.45401	0.27326	0.27252
-14.8247	0	0	0	0	0	0	0	0	0	509	0.44579	0.44074	0.2654	0.26393
-14.7713	0	0	0	0	0	0	0	1	0	510	0.43451	0.42938	0.25813	0.25676
-14.7179	0	0	0	0	0	2	0	0	0	511	0.42123	0.41644	0.24977	0.24937
-14.6645	0	0	0	0	0	0	0	0	0	512	0.40958	0.40409	0.24205	0.24098
-14.6111	0	0	0	0	0	0	0	0	0	513	0.3987	0.39432	0.23593	0.23437
-14.5577	0	0	0	0	0	0	0	0	0	514	0.38685	0.38199	0.22823	0.22691
-14.5044	0	0	0	0	0	0	0	0	0	515	0.37481	0.37045	0.22091	0.22019
-14.451	0	0	0	0	0	0	0	1	0	516	0.36442	0.36039	0.21486	0.21378
-14.3976	0	2	0	0	0	1	0	0	0	517	0.35372	0.34921	0.20846	0.20735
-14.3442	0	0	0	0	0	0	0	0	0	518	0.34311	0.33853	0.20161	0.20069
-14.2908	0	0	0	0	0	0	0	0	0	519	0.3342	0.32999	0.19631	0.19518
-14.2374	0	0	0	0	0	0	0	0	0	520	0.32404	0.31947	0.18992	0.18906
-14.184	0	0	0	0	0	0	0	0	0	521	0.31438	0.30993	0.18363	0.1827
-14.1306	0	0	0	0	0	0	0	0	0	522	0.30579	0.30172	0.17826	0.17723
-14.0772	0	0	0	0	0	0	0	0	0	523	0.29618	0.29142	0.17263	0.17162
-14.0239	0	0	0	0	0	0	0	0	0	524	0.2873	0.28328	0.16712	0.16617
-13.9705	0	0	0	0	0	0	0	1	0	525	0.27929	0.27551	0.16316	0.16192
-13.9171	0	0	0	0	0	0	0	0	0	526	0.2702	0.26699	0.15743	0.15623
-13.8637	0	0	0	0	0	0	0	0	0	527	0.26226	0.25879	0.15234	0.1514
-13.8103	0	0	0	0	0	0	0	0	0	528	0.25556	0.25171	0.14783	0.1468
-13.7569	0	0	0	0	0	0	0	0	0	529	0.24681	0.2436	0.14284	0.14154
-13.7035	0	0	0	0	0	1	0	0	0	530	0.2389	0.2359	0.13806	0.137
-13.6502	0	0	0	0	0	0	0	0	0	531	0.23226	0.22922	0.13415	0.13377
-13.5968	0	0	0	0	0	0	0	0	0	532	0.22456	0.22203	0.12984	0.12858
-13.5434	0	0	0	0	0	0	0	0	0	533	0.21788	0.21525	0.12549	0.12486
-13.49	0	0	0	0	0	0	0	0	0	534	0.21122	0.20867	0.12202	0.1207
-13.4366	0	0	0	0	0	0	0	0	0	535	0.20462	0.20168	0.11743	0.11652
-13.3832	0	0	0	0	0	0	0	0	0	536	0.19847	0.19623	0.11384	0.11306
-13.3298	0	0	0	0	0	0	0	0	0	537	0.19301	0.19014	0.11054	0.10968
-13.2765	0	0	0	0	0	0	0	0	0	538	0.18603	0.18366	0.10681	0.10595
-13.2231	0	0	0	0	0	1	0	0	0	539	0.18041	0.17792	0.10383	0.10288
-13.1697	0	0	0	0	0	0	0	0	0	540	0.17485	0.17266	0.10031	0.09977
-13.1163	0	0	0	0	0	1	0	0	0	541	0.16879	0.16667	0.09671	0.09604
-13.0629	0	0	0	0	0	0	0	1	0	542	0.16367	0.1616	0.09452	0.09376
-13.0095	0	0	0	0	0	1	0	0	0	543	0.15922	0.15704	0.09098	0.09057
-12.9561	0	0	0	0	0	1	0	0	0	544	0.15329	0.1513	0.08776	0.0872
-12.9027	0	0	0	0	0	0	0	0	0	545	0.14829	0.14675	0.08559	0.0846
-12.8494	0	0	0	0	0	0	0	0	0	546	0.14409	0.14231	0.0828	0.08219
-12.796	0	0	0	0	0	0	0	0	0	547	0.13924	0.13696	0.07994	0.07932
-12.7426	0	0	0	0	0	0	0	0	0	548	0.13493	0.13312	0.07777	0.07667
-12.6892	0	0	0	0	0	0	0	0	0	549	0.13047	0.12853	0.07493	0.07451
-12.6358	0	0	0	0	0	1	0	0	0	550	0.12602	0.1244	0.07216	0.07165
-12.5824	0	0	0	0	0	0	0	0	0	551	0.12267	0.12067	0.06979	0.06972
-12.529	0	0	0	0	0	0	0	0	0	552	0.11871	0.11708	0.06791	0.06711
-12.4756	0	0	0	0	0	0	0	1	0	553	0.11454	0.11305	0.06522	0.06492
-12.4223	0	0	0	0	0	0	0	0	0	554	0.11114	0.10942	0.06347	0.06336
-12.3689	0	1	0	0	0	0	0	0	0	555	0.10771	0.10635	0.06133	0.06098
-12.3155	0	0	0	0	0	0	0	0	0	556	0.1038	0.10239	0.05969	0.05907
-12.2621	0	0	0	0	0	1	0	0	0	557	0.10111	0.09939	0.05788	0.05751
-12.2087	0	0	0	0	0	0	0	0	0	558	0.09776	0.09658	0.05563	0.05534
-12.1553	0	0	0	0	0	0	0	0	0	559	0.09444	0.09287	0.05371	0.0535
-12.102	0	0	0	0	0	0	0	0	0	560	0.0915	0.0901	0.05222	0.05201
-12.0486	0	0	0	0	0	0	0	0	0	561	0.08842	0.08702	0.05047	0.05066
-11.9952	0	0	0	0	0	0	0	0	0	562	0.0853	0.08399	0.04915	0.04884
-11.9418	0	0	0	0	0	0	0	0	0	563	0.08271	0.08162	0.04789	0.04752
-11.8884	0	0	0	0	0	0	0	0	0	564	0.08008	0.07894	0.04582	0.04563
-11.835	0	0	0	0	0	0	0	0	0	565	0.07724	0.07656	0.04459	0.04442
-11.7816	0	0	0	1	0	0	0	0	0	566	0.07515	0.07432	0.04288	0.04307
-11.7282	0	0	0	0	0	0	0	0	0	567	0.07271	0.0716	0.04169	0.0417
-11.6748	0	0	0	0	0	1	0	0	0	568	0.07026	0.06926	0.04032	0.04039
-11.6215	0	0	0	0	0	0	0	0	0	569	0.0678	0.06725	0.03926	0.03939
-11.5681	0	0	0	0	0	0	0	1	0	570	0.06562	0.06463	0.03773	0.03796
-11.5147	0	0	0	0	0	0	0	0	0	571	0.06349	0.06269	0.03667	0.03683
-11.4613	0	0	0	0	0	0	0	0	0	572	0.06171	0.06093	0.03579	0.03574
-11.4079	0	0	0	0	0	0	0	0	0	573	0.05961	0.05893	0.03434	0.03435
-11.3545	0	0	0	0	0	0	0	0	0	574	0.05742	0.05695	0.03336	0.03351
-11.3011	0	0	0	0	0	0	0	0	0	575	0.05579	0.05498	0.03238	0.03243
-11.2478	0	0	0	0	0	0	0	0	0	576	0.05396	0.05321	0.03134	0.03145
-11.1944	0	0	0	0	0	1	0	0	0	577	0.05216	0.05149	0.03016	0.03054
-11.141	0	0	0	0	0	0	0	0	0	578	0.05056	0.05005	0.02953	0.02944
-11.0876	0	0	0	0	0	1	0	0	0	579	0.04881	0.04833	0.02831	0.02877
-11.0342	0	0	0	0	0	0	0	0	0	580	0.04732	0.04672	0.02764	0.02742
-10.9808	0	0	0	0	0	0	0	0	0	581	0.04598	0.04528	0.02658	0.02683
-10.9274	0	0	0	0	0	0	0	0	0	582	0.04404	0.04361	0.02585	0.02617
-10.8741	0	0	0	0	0	0	0	0	0	583	0.04268	0.0422	0.02479	0.02531
-10.8207	0	0	0	0	0	0	0	0	0	584	0.04117	0.04055	0.02422	0.02443
-10.7673	0	0	0	0	0	0	0	0	0	585	0.03979	0.03913	0.02324	0.0239
-10.7139	0	0	0	0	0	0	0	0	0	586	0.03867	0.03812	0.02284	0.02305
-10.6605	0	0	0	0	0	0	0	0	0	587	0.03756	0.03705	0.02174	0.0224
-10.6071	0	0	0	0	0	0	0	0	0	588	0.03604	0.03549	0.02122	0.02177
-10.5537	0	0	0	0	0	0	0	0	0	589	0.03489	0.03454	0.02053	0.02107
-10.5003	0	0	0	0	0	0	0	0	0	590	0.03396	0.03339	0.02001	0.02042
-10.447	0	0	0	0	0	0	0	0	0	591	0.03282	0.03233	0.01922	0.0199
-10.3936	0	0	0	0	0	0	0	0	0	592	0.03181	0.0314	0.0188	0.0193
-10.3402	0	0	0	0	0	1	0	0	0	593	0.03078	0.03041	0.0179	0.01875
-10.2868	0	0	0	0	0	0	0	0	0	594	0.02965	0.02924	0.01744	0.018
-10.2334	0	0	0	0	0	0	0	0	0	595	0.02875	0.02827	0.01713	0.01736
-10.18	0	0	0	0	0	0	0	0	0	596	0.02769	0.02732	0.01632	0.01694
-10.1266	0	0	0	0	0	0	0	0	0	597	0.02683	0.02639	0.01584	0.01632
-10.0732	0	0	0	0	0	0	0	1	0	598	0.0261	0.02568	0.01532	0.01595
-10.0199	0	0	0	0	0	0	0	0	0	599	0.02514	0.02478	0.01483	0.01554
-9.96648	0	0	0	0	0	0	0	0	0	600	0.02434	0.02391	0.01448	0.01507
-9.91309	0	0	0	0	0	0	0	0	0	601	0.02375	0.02328	0.01371	0.01449
-9.8597	0	0	0	0	0	0	0	0	0	602	0.02276	0.02261	0.01328	0.0141
-9.80632	0	0	0	0	0	0	0	0	0	603	0.02203	0.02163	0.01289	0.01373
-9.75293	0	0	0	0	0	0	0	0	0	604	0.02134	0.02108	0.01263	0.01336
-9.69954	0	0	0	0	0	0	0	0	0	605	0.02071	0.02031	0.01217	0.01287
-9.64616	0	0	0	0	0	0	0	0	0	606	0.01996	0.01981	0.01175	0.01263
-9.59277	0	0	0	0	0	0	0	1	0	607	0.01946	0.01905	0.01119	0.01213
-9.53938	0	0	0	0	0	0	0	0	0	608	0.01877	0.01854	0.01092	0.01182
-9.486	0	0	0	0	0	0	0	0	0	609	0.01809	0.01791	0.01062	0.01148
-9.43261	0	0	0	0	0	1	0	0	0	610	0.01756	0.0173	0.01016	0.01109
-9.37922	0	0	0	0	0	1	0	0	0	611	0.017	0.01679	0.00993	0.01088
-9.32584	0	0	0	0	0	0	0	0	0	612	0.01636	0.0164	0.00982	0.01069
-9.27245	0	0	0	0	0	1	0	0	0	613	0.01595	0.01574	0.00936	0.01025
-9.21906	0	0	0	0	0	0	0	0	0	614	0.0154	0.0151	0.00924	0.01005
-9.16568	0	0	0	1	0	0	0	0	0	615	0.01498	0.01486	0.00888	0.00974
-9.11229	0	0	0	0	0	1	0	0	0	616	0.0145	0.01436	0.0085	0.00943
-9.0589	0	1	0	0	0	0	0	0	0	617	0.01405	0.01378	0.00835	0.00922
-9.00552	0	0	0	0	0	0	0	0	0	618	0.0136	0.01339	0.00837	0.00906
-8.95213	0	0	0	1	0	0	0	0	0	619	0.01316	0.01295	0.00775	0.00907
-8.89874	0	0	0	1	0	0	0	0	0	620	0.01265	0.01263	0.0077	0.00887
-8.84536	0	0	0	0	0	1	0	0	0	621	0.01229	0.01214	0.0076	0.00857
-8.79197	0	0	0	0	0	0	0	0	0	622	0.01187	0.01183	0.0072	0.00817
-8.73858	0	0	0	0	0	0	0	0	0	623	0.01153	0.01141	0.00709	0.00798
-8.6852	0	0	0	0	0	0	0	0	0	624	0.01119	0.01108	0.00684	0.00789
-8.63181	0	0	0	0	0	0	0	0	0	625	0.01096	0.01067	0.00668	0.00769
-8.57842	0	0	0	0	0	0	0	0	0	626	0.01058	0.01044	0.00647	0.00761
-8.52504	0	0	0	0	0	1	0	0	0	627	0.01018	0.01014	0.0061	0.00715
-8.47165	0	0	0	0	0	0	0	0	0	628	0.00992	0.00981	0.00597	0.00716
-8.41826	0	0	0	0	0	0	0	0	0	629	0.00953	0.00944	0.00586	0.00702
-8.36488	0	0	0	0	0	0	0	0	0	630	0.00935	0.0092	0.00546	0.00663
-8.31149	0	0	0	0	0	0	0	1	0	631	0.00896	0.00889	0.00547	0.00659
-8.2581	0	0	0	0	0	0	0	0	0	632	0.00875	0.00869	0.00515	0.00634
-8.20472	0	0	0	0	0	0	0	0	0	633	0.00852	0.0084	0.00497	0.0061
-8.15133	0	0	0	0	0	0	0	0	0	634	0.0082	0.00816	0.00487	0.00601
-8.09794	0	0	0	0	0	0	0	0	0	635	0.00805	0.00791	0.00454	0.00576
-8.04456	0	0	0	0	0	0	0	0	0	636	0.00785	0.00776	0.00456	0.00553
-7.99117	0	0	0	0	0	0	0	0	0	637	0.00761	0.00746	0.00423	0.00543
-7.93778	0	0	0	0	0	0	0	0	0	638	0.0074	0.00741	0.00407	0.00536
-7.88439	0	0	0	0	0	0	0	1	0	639	0.00722	0.00714	0.00394	0.00507
-7.83101	0	0	0	0	0	0	0	0	0	640	0.007	0.00695	0.00379	0.00494
-7.77762	0	0	0	0	0	0	0	0	0	641	0.00686	0.0068	0.00349	0.00488
-7.72423	0	0	0	0	0	0	0	0	0	642	0.00666	0.00653	0.00333	0.00464
-7.67085	0	0	0	0	0	0	0	0	0	643	0.00644	0.00631	0.00322	0.0044
-7.61746	0	0	0	0	0	1	0	0	0	644	0.00629	0.00623	0.0032	0.00437
-7.56407	0	0	0	0	0	0	0	1	0	645	0.00615	0.00604	0.00299	0.00428
-7.51069	0	0	0	0	0	0	0	0	0	646	0.00591	0.00581	0.00283	0.00398
-7.4573	0	0	0	0	0	0	0	0	0	647	0.00567	0.00564	0.00271	0.00397
-7.40391	0	0	0	0	0	0	0	0	0	648	0.00557	0.00555	0.00261	0.00384
-7.35053	0	0	0	0	0	0	0	0	0	649	0.00534	0.00531	0.00235	0.0037
-7.29714	0	0	0	0	0	0	0	0	0	650	0.00528	0.00515	0.00227	0.00372
-7.24375	0	0	0	0	0	0	0	0	0	651	0.00505	0.00497	0.00218	0.00338
-7.19037	0	0	0	0	0	2	0	0	0	652	0.0049	0.00484	0.0021	0.00337
-7.13698	0	0	0	0	0	1	0	0	0	653	0.00482	0.00468	0.00197	0.00324
-7.08359	0	0	0	0	0	0	0	0	0	654	0.00455	0.00453	0.00177	0.00314
-7.03021	0	0	0	0	0	0	0	0	0	655	0.00449	0.00439	0.00162	0.00306
-6.97682	0	0	0	0	0	1	0	0	0	656	0.0043	0.00421	0.00174	0.00299
-6.92343	0	0	0	0	0	0	0	0	0	657	0.00419	0.00411	0.00144	0.00289
-6.87005	0	0	0	0	0	0	0	0	0	658	0.00403	0.004	0.00139	0.00274
-6.81666	0	0	0	0	0	0	0	0	0	659	0.00392	0.00388	0.0013	0.00261
-6.76327	0	0	0	0	0	1	0	0	0	660	0.00378	0.00369	0.00131	0.00266
-6.70989	0	0	0	0	0	0	0	0	0	661	0.00365	0.00364	0.00111	0.00244
-6.6565	0	0	0	0	0	2	0	0	0	662	0.00356	0.00349	0.000996511	0.00242
-6.60311	0	0	0	0	0	0	0	0	0	663	0.00343	0.00339	0.000955675	0.00231
-6.54973	0	0	0	0	0	0	0	0	0	664	0.00331	0.00331	0.001	0.00226
-6.49634	0	0	0	0	0	0	0	0	0	665	0.0033	0.00322	0.000718033	0.00221
-6.44295	0	0	0	0	0	0	0	0	0	666	0.00313	0.00312	0.00069648	0.0021
-6.38957	0	0	0	0	0	0	0	0	0	667	0.00304	0.00299	0.000551286	0.00199
-6.33618	0	0	0	0	0	0	0	1	0	668	0.003	0.00292	0.000567166	0.0019
-6.28279	0	0	0	0	0	0	0	0	0	669	0.00289	0.0028	0.000461673	0.00189
-6.22941	0	0	0	0	0	0	0	0	0	670	0.00278	0.00272	0.000360151	0.00181
-6.17602	0	0	0	0	0	0	0	0	0	671	0.00273	0.00266	0.000314777	0.00179
-6.12263	0	0	0	0	0	0	0	0	0	672	0.00259	0.00257	9.07466e-05	0.00174
-6.06925	0	0	0	1	0	0	0	0	0	673	0.0025	0.00254	0.000268837	0.00174
-6.01586	0	0	0	0	0	0	0	1	0	674	0.00246	0.00242	0.000131015	0.00165
-5.96247	0	0	0	0	0	0	0	0	0	675	0.00242	0.00236	9.35825e-05	0.00159
-5.90909	0	0	0	0	0	0	0	0	0	676	0.00231	0.00229	0.00016221	0.00156
-5.8557	0	0	0	0	0	1	0	0	0	677	0.00223	0.0022	0	0.00153
-5.80231	0	0	0	0	0	1	0	0	0	678	0.00216	0.00216	2.77912e-05	0.00157
-5.74893	0	0	0	0	0	0	0	0	0	679	0.0021	0.0021	4.02688e-05	0.00143
-5.69554	0	0	0	0	0	0	0	0	0	680	0.00202	0.00201	0.000243882	0.00152
-5.64215	0	0	0	0	0	0	0	0	0
-5.58877	0	0	0	0	0	0	0	0	0
-5.53538	0	0	0	0	0	0	0	1	0
-5.48199	0	0	0	0	0	0	0	0	0
-5.42861	0	0	0	0	0	0	0	1	0
-5.37522	0	0	0	0	0	0	0	0	0
-5.32183	0	0	0	0	0	0	0	0	0
-5.26845	0	0	0	0	0	0	0	0	0
-5.21506	0	0	0	0	0	0	0	1	0
-5.16167	0	0	0	1	0	0	0	0	0
-5.10829	0	0	0	0	0	0	0	0	0
-5.0549	0	0	0	0	0	1	0	0	0
-5.00151	0	0	0	0	0	0	0	0	0
-4.94813	0	0	0	0	0	1	0	0	0
-4.89474	0	0	0	0	0	0	0	0	0
-4.84135	0	0	0	0	0	0	0	0	0
-4.78796	0	0	0	0	0	0	0	0	0
-4.73458	0	0	0	0	0	1	0	0	0
-4.68119	0	0	0	0	0	0	0	0	0
-4.6278	0	0	0	0	0	0	0	0	0
-4.57442	0	0	0	0	0	1	0	0	0
-4.52103	0	0	0	0	0	1	0	0	0
-4.46764	0	0	0	0	0	0	0	0	0
-4.41426	0	0	0	0	0	1	0	0	0
-4.36087	0	0	0	0	0	0	0	0	0
-4.30748	0	0	0	0	0	1	0	0	0
-4.2541	0	0	0	0	0	1	0	0	0
-4.20071	0	0	0	0	0	0	0	0	0
-4.14732	0	0	0	0	0	0	0	0	0
-4.09394	0	0	0	0	0	0	0	0	0
-4.04055	0	0	0	0	0	0	0	0	0
-3.98716	0	0	0	0	0	0	0	0	0
-3.93378	0	0	0	0	0	0	0	0	0
-3.88039	0	0	0	0	0	1	0	0	0
-3.827	0	0	0	0	0	0	0	0	0
-3.77362	0	0	0	0	0	0	0	0	0
-3.72023	0	0	0	0	0	2	0	0	0
-3.66684	0	0	0	0	0	1	0	0	0
-3.61346	0	0	0	0	0	0	0	0	0
-3.56007	0	0	0	0	0	1	0	0	0
-3.50668	0	0	0	0	0	1	0	0	0
-3.4533	0	0	0	0	0	0	0	0	0
-3.39991	0	0	0	0	0	0	0	0	0
-3.34652	0	0	0	0	0	0	0	0	0
-3.29314	0	1	0	0	0	0	0	0	0
-3.23975	0	0	0	0	0	0	0	0	0
-3.18636	0	0	0	0	0	1	0	0	0
-3.13298	0	0	0	0	0	1	0	0	0
-3.07959	0	0	0	0	0	0	0	0	0
-3.0262	0	0	0	0	0	1	0	0	0
-2.97282	0	1	0	0	0	1	0	0	0
-2.91943	0	0	0	0	0	0	0	0	0
-2.86604	0	0	0	1	0	1	0	0	0
-2.81266	0	0	0	0	0	0	0	0	0
-2.75927	0	0	0	0	0	0	0	0	0
-2.70588	0	0	0	0	0	0	0	1	0
-2.6525	0	0	0	0	0	0	0	0	0
-2.59911	0	0	0	0	0	0	0	0	0
-2.54572	0	0	0	0	0	0	0	0	0
-2.49234	0	0	0	0	0	1	0	0	0
-2.43895	0	0	0	0	0	0	0	0	0
-2.38556	0	0	0	0	0	0	0	0	0
-2.33218	0	0	0	0	0	1	0	0	0
-2.27879	0	0	0	0	0	0	0	0	0
-2.2254	0	0	0	0	0	1	0	0	0
-2.17202	1	0	0	0	0	0	0	0	0
-2.11863	0	0	0	0	0	0	0	0	0
-2.06524	0	0	0	0	0	0	0	0	0
-2.01186	0	0	0	0	0	0	0	0	0
-1.95847	0	0	0	0	0	0	0	0	0
-1.90508	0	0	0	0	0	0	0	0	0
-1.8517	0	0	-0.65671	1	0	0	0	0	0
-1.79831	0	0	-0.65671	0	0	0	0	0	0
-1.74492	0	0	-0.65671	0	0	0	0	0	0
-1.69154	0	0	-0.65671	0	0	0	0	0	0
-1.63815	0	0	-0.65671	0	0	0	0	0	0
-1.58476	0	0	-0.65671	1	0	0	0	0	0
-1.53137	0	0	-0.65671	0	0	0	0	0	0
-1.47799	0	0	-0.65671	0	0	0	0	0	0
-1.4246	0	0	-0.65671	0	0	0	0	0	0
-1.37121	0	0	-0.65671	0	0	0	0	1	0
-1.31783	0	0	-0.65671	0	0	0	0	0	0
-1.26444	0	0	-0.65671	0	0	0	0	0	0
-1.21105	0	0	-0.65671	0	-0.66494	0	0	1	0
-1.15767	0	0	-0.65671	0	-0.66494	0	0	0	0
-1.10428	0	0	-0.65671	0	-0.66494	0	0	0	0
-1.05089	0	0	-0.65671	0	-0.66494	0	1.3334	1	0.89519
-0.99751	0	0	-0.65671	0	-0.66494	0	1.3334	1	0.89519
-0.94412	0	0	-0.65671	0	-0.66494	0	1.3334	0	0.89519
-0.89073	0	0	-0.65671	0	-0.66494	0	1.3334	0	0.89519
-0.83735	0	0	-0.65671	0	-0.66494	0	1.3334	0	0.89519
-0.78396	0	0	-0.65671	0	-0.66494	0	1.3334	0	0.89519
-0.73057	0	0	-0.65671	0	-0.66494	0	1.3334	0	0.89519
-0.67719	0	0	-0.65671	0	-0.66494	0	1.3334	0	0.89519
-0.6238	0	0	-0.65671	0	-0.66494	0	1.3334	0	0.89519
-0.57041	0	1	-0.65671	0	-0.66494	1	1.3334	0	0.89519
-0.51703	0	0	-0.65049	1	-0.66494	0	1.3334	1	0.89519
-0.46364	1	0	-0.59294	0	-0.62853	1	1.3334	1	0.89519
-0.41025	1	0	-0.54302	0	-0.57419	0	1.3334	0	0.89519
-0.35687	0	0	-0.52712	0	-0.55718	1	1.3334	0	0.89519
-0.30348	3	0	-0.34456	1	-0.44974	1	1.3334	0	0.89519
-0.25009	5	3	0.06089	1	-0.21558	2	1.3334	1	0.89519
-0.19671	25	1	1.56732	3	0.78004	4	5.88791	2	2.24682
-0.14332	38	3	4.01102	1	2.6032	15	12.2912	7	7.10074
-0.08993	87	7	9.36734	6	6.4211	32	28.2323	20	16.0458
-0.03655	159	18	19.2172	15	13.7058	50	56.6295	26	34.9937
0.01684	306	33	37.5161	18	27.5574	93	111.442	53	70.0912
0.07023	485	69	66.2356	48	50.4231	160	193.457	119	130.831
0.12361	748	107	109.694	74	85.8071	281	315.013	208	221.746
0.177	1048	151	169.569	137	136.411	503	474.895	309	350.895
0.23039	1365	257	247.623	198	203.298	658	667.636	505	516.322
0.28377	1882	360	354.181	308	293.811	912	931.038	721	726.125
0.33716	2465	464	491.748	392	413.693	1223	1263.45	1022	1004.51
0.39055	3004	673	658.176	539	562.107	1602	1638.26	1408	1343.07
0.44393	3667	855	859.926	731	742.323	2106	2074.07	1803	1730.84
0.49732	4433	1036	1101.7	975	959.92	2595	2580.88	2169	2182.95
0.55071	5214	1388	1382.38	1221	1216.8	3210	3146.15	2794	2702.15
0.60409	5819	1743	1692.21	1484	1506.28	3785	3717.13	3302	3264.96
0.65748	6425	2083	2031.5	1870	1824.68	4334	4294.74	3819	3837.51
0.71087	7145	2343	2405.1	2214	2175.82	5023	4906.36	4522	4427.71
0.76425	7768	2782	2806.56	2552	2557.87	5654	5524.52	4997	5043.92
0.81764	8246	3281	3228.89	2946	2963.39	6193	6117.08	5690	5658.27
0.87103	8852	3820	3677.9	3464	3394.12	6644	6722.4	6232	6260.89
0.92441	9362	4144	4147.44	3895	3848.69	7523	7318.77	6911	6869.1
0.9778	9727	4632	4628.1	4288	4319.81	7782	7877.85	7381	7459.82
1.03119	9800	5122	5105.52	4849	4794.07	8235	8344.99	7837	7998.16
1.08457	9968	5551	5583.63	5319	5269.64	8757	8767.22	8379	8461.82
1.13796	9912	6144	6052.11	5741	5740.3	9218	9107.77	8991	8868.74
1.19135	10000	6619	6517.58	6200	6207.39	9348	9421.34	9272	9210.22
1.24473	9872	7013	6969.05	6777	6665.96	9654	9667.44	9593	9509.04
1.29812	9712	7357	7404.2	7176	7111.12	9749	9856.09	9757	9741.8
1.35151	9347	7879	7813.06	7412	7535.19	9999	9955.81	9803	9905.75
1.40489	8977	8060	8194.86	7901	7934.67	9884	9987.73	9929	9986.5
1.45828	8392	8582	8540.7	8403	8302.17	10000	9920.07	10000	9987.93
1.51167	8029	8962	8860.19	8560	8642.41	9698	9827.46	9846	9911.29
1.56505	7215	9056	9131.27	8836	8943.63	9620	9613.07	9719	9775.94
1.61844	6478	9325	9359.06	9164	9200.96	9296	9322.4	9591	9533.07
1.67183	5737	9497	9544.08	9475	9416.47	9000	8972.59	9171	9217.28
1.72522	4949	9474	9685.5	9583	9589.06	8570	8565.47	8827	8839.75
1.7786	4270	9825	9789.97	9769	9722.54	8058	8137.36	8585	8412.98
1.83199	3608	9718	9859.54	9717	9820.16	7734	7694.5	8048	7963.06
1.88538	3023	9952	9898.8	9881	9885.56	7146	7254.59	7528	7500.33
1.93876	2443	9775	9908.39	9950	9920.8	6647	6814.55	6982	7036.65
1.99215	1847	10000	9889.2	9794	9925.8	6361	6367.11	6603	6569.12
2.04554	1456	9908	9851.95	10000	9908.1	5852	5957.3	5969	6107.47
2.09892	1030	9673	9795.91	9878	9870.48	5659	5564.75	5562	5675.5
2.15231	757	9702	9729.86	9858	9818.05	5110	5216.38	5180	5268.95
2.2057	607	9626	9660.16	9699	9758.23	4920	4926.36	4793	4910.42
2.25908	479	9492	9588.11	9490	9694.07	4778	4682.27	4509	4606.16
2.31247	412	9511	9516.74	9615	9628.11	4624	4483.84	4417	4349.06
2.36586	368	9459	9446.73	9580	9562.2	4402	4322.85	4113	4137.16
2.41924	294	9271	9376.78	9608	9495.55	4256	4181.37	3952	3960.06
2.47263	305	9487	9310.53	9547	9430.55	4100	4072.5	3874	3810.05
2.52602	240	9188	9244.13	9215	9365.87	4005	3969.98	3806	3687.45
2.5794	234	9315	9180.49	9305	9302.12	4042	3884.7	3656	3578.11
2.63279	239	9101	9119.58	9154	9240.66	4042	3814.51	3679	3487.96
2.68618	192	9116	9058.86	9104	9179.66	3881	3743.38	3576	3410.31
2.73956	204	9051	9000.94	9056	9120.2	3763	3684.58	3455	3338.35
2.79295	175	8965	8943.51	9102	9061.77	3789	3625.72	3454	3276.52
2.84634	145	8995	8886.52	8993	9003.45	3564	3566.34	3337	3216.26
2.89972	140	8755	8831.16	8912	8946.07	3583	3512.26	3258	3158.69
2.95311	141	8944	8777.42	9000	8890.21	3601	3463.56	3119	3107.21
3.0065	114	8747	8723.82	8810	8834.87	3553	3412.48	3114	3059.36
3.05988	102	8784	8671.05	8829	8780	3503	3362.97	2997	3011.19
3.11327	93	8587	8619.13	8696	8725.92	3365	3315.42	3096	2965.21
3.16666	79	8587	8567.69	8763	8672.43	3339	3268.24	3059	2921.02
3.22004	62	8501	8516.59	8836	8619.28	3096	3220.68	2958	2877.29
3.27343	61	8361	8466.51	8347	8566.92	3076	3176.54	2850	2834.59
3.32682	49	8548	8416.92	8553	8515.19	3237	3132.53	2825	2794.33
3.3802	54	8229	8368.62	8451	8464.46	3062	3092.5	2716	2755.49
3.43359	59	8192	8321.34	8456	8414.98	2949	3055.57	2757	2720.3
3.48698	34	8295	8273.6	8345	8365.61	2901	3014.15	2663	2685.92
3.54036	28	8441	8226.38	8290	8316.43	3039	2973.73	2689	2649.1
3.59375	28	8118	8179.83	8248	8267.99	2831	2935.59	2600	2613.7
3.64714	11	8058	8133.25	8141	8219.74	2827	2895.38	2590	2579.15
3.70052	28	8156	8088.2	8357	8172.56	2789	2861.37	2508	2545.13
3.75391	21	8045	8043.36	8143	8126.17	2709	2826.72	2381	2514.95
3.8073	11	8131	7998.63	8145	8079.97	2780	2790.88	2475	2484.03
3.86068	13	8051	7954.61	8013	8034.33	2670	2757.01	2381	2452.99
3.91407	15	7944	7911.23	8085	7989.42	2678	2724.72	2369	2423.71
3.96746	15	7937	7868.34	8009	7945.16	2778	2693.24	2349	2395.69
4.02084	9	7860	7825.64	7938	7901.25	2641	2661.09	2309	2368.03
4.07423	12	7739	7783.56	8080	7857.89	2640	2630.57	2303	2340.43
4.12762	11	7756	7741.86	7964	7815.07	2533	2600.47	2353	2314.01
4.181	10	7894	7700.51	7703	7772.69	2479	2570.78	2173	2287.97
4.23439	5	7800	7659.31	7776	7730.6	2516	2540.57	2258	2262.04
4.28778	7	7666	7618.59	7599	7688.95	2420	2511.65	2141	2236.15
4.34116	3	7475	7578.07	7796	7647.64	2471	2482.92	2165	2211.12
4.39455	8	7415	7538.16	7660	7606.86	2502	2455.52	2153	2186.56
4.44794	6	7580	7498.52	7606	7566.52	2376	2428.09	2134	2162.84
4.50132	12	7346	7459.48	7422	7526.76	2304	2402.52	2076	2139.63
4.55471	4	7479	7420.37	7590	7487.19	2299	2375.51	2036	2117.18
4.6081	10	7201	7381.84	7483	7448.06	2341	2350.2	2023	2094.29
4.66148	2	7214	7343.21	7389	7409.1	2290	2324.01	2033	2072.22
4.71487	4	7304	7304.98	7375	7370.42	2195	2298.37	1994	2049.71
4.76826	6	7218	7267.13	7227	7332.18	2139	2273.46	1944	2027.73
4.82164	3	7194	7229.42	7190	7294.18	2303	2248.74	2014	2006.25
4.87503	6	7291	7192.14	7188	7256.56	2192	2224.67	1983	1985.04
4.92842	7	7048	7155.16	7220	7219.34	2234	2201.19	1947	1964.4
4.98181	4	7071	7118.3	7254	7182.31	2192	2177.54	1879	1944.06
5.03519	8	7127	7081.87	7142	7145.67	2124	2154.98	1930	1923.9
5.08858	4	6884	7045.47	7142	7109.23	2039	2131.95	1836	1904.28
5.14197	2	7183	7009.24	7076	7072.91	2080	2109.31	1867	1884.45
5.19535	7	6954	6973.49	7061	7037.01	2123	2087.52	1921	1865.1
5.24874	5	6798	6937.85	6983	7001.39	2094	2065.52	1811	1846.2
5.30213	1	6945	6902.24	6946	6965.84	2042	2043.89	1844	1827.24
5.35551	3	6862	6866.95	6860	6930.54	1985	2022.6	1793	1808.59
5.4089	2	6872	6831.87	6896	6895.49	2029	2001.65	1761	1790.23
5.46229	6	6956	6797.2	6879	6860.8	1910	1981.25	1795	1772.22
5.51567	4	6925	6762.66	6784	6826.35	1930	1960.86	1688	1754.54
5.56906	8	6734	6728.51	6866	6792.23	1930	1941.46	1623	1737.15
5.62245	4	6626	6694.38	6627	6758.27	1936	1921.52	1718	1720.2
5.67583	6	6541	6660.56	6746	6724.52	1898	1902.12	1619	1703.05
5.72922	6	6562	6626.92	6695	6691.03	1798	1882.98	1699	1686.3
5.78261	4	6606	6593.39	6625	6657.68	1861	1863.87	1609	1669.7
5.83599	4	6776	6560.04	6504	6624.5	1884	1845.07	1638	1653.18
5.88938	2	6577	6526.8	6653	6591.45	1819	1826.57	1634	1636.93
5.94277	4	6426	6493.86	6598	6558.65	1719	1808.35	1564	1620.92
5.99615	5	6473	6461.18	6403	6526.12	1754	1790.39	1555	1605.14
6.04954	5	6347	6428.71	6568	6493.81	1730	1772.69	1557	1589.59
6.10293	10	6454	6396.65	6536	6461.87	1710	1756.38	1589	1574.6
6.15631	4	6338	6364.48	6493	6430	1729	1738.89	1513	1560.13
6.2097	6	6288	6332.6	6403	6398.28	1777	1721.92	1546	1545.05
6.26309	6	6218	6300.88	6256	6366.78	1628	1705.19	1521	1530.36
6.31647	3	6207	6269.19	6341	6335.36	1752	1688.46	1478	1515.8
6.36986	3	6303	6237.66	6195	6304.07	1622	1672.01	1435	1501.29
6.42325	0	6222	6206.18	6337	6272.85	1608	1655.83	1565	1487.02
6.47663	3	6115	6175.05	6165	6241.87	1616	1639.89	1478	1472.97
6.53002	4	6059	6144.13	6285	6211.16	1609	1624.18	1441	1459.13
6.58341	1	6136	6113.23	6225	6180.54	1547	1608.7	1398	1445.48
6.63679	1	6256	6082.51	6127	6150.03	1584	1593.43	1448	1432.02
6.69018	1	6048	6052	5964	6119.71	1537	1578.37	1426	1418.74
6.74357	5	6136	6021.85	6114	6089.7	1552	1563.51	1401	1405.64
6.79695	3	5940	5991.79	5973	6059.86	1608	1548.85	1435	1392.71
6.85034	7	6021	5962.1	6077	6030.3	1534	1534.84	1323	1380.09
6.90373	5	5963	5932.45	6080	6000.91	1491	1520.45	1412	1367.76
6.95711	2	5885	5902.8	6000	5971.53	1549	1506.26	1350	1355.23
7.0105	1	5870	5873.26	5863	5942.23	1485	1492.29	1259	1342.89
7.06389	0	5871	5843.87	6003	5913.03	1452	1478.51	1296	1330.72
7.11727	3	5737	5814.8	5893	5884.09	1464	1464.92	1304	1318.71
7.17066	5	5785	5785.98	5976	5855.44	1392	1451.52	1295	1306.87
7.22405	1	5756	5757.12	5842	5826.84	1442	1438.29	1278	1295.18
7.27743	3	5824	5728.52	5648	5798.39	1498	1425.23	1306	1283.64
7.33082	1	5621	5699.98	5749	5770.07	1504	1412.34	1274	1272.25
7.38421	2	5724	5671.66	5740	5741.9	1401	1399.62	1238	1261
7.43759	4	5586	5643.59	5750	5713.98	1409	1387.05	1237	1249.89
7.49098	1	5612	5615.53	5642	5686.13	1336	1374.65	1250	1238.91
7.54437	3	5648	5587.72	5692	5658.46	1352	1362.4	1228	1228.08
7.59775	1	5621	5559.97	5579	5630.9	1363	1350.3	1213	1217.37
7.65114	2	5450	5532.43	5572	5603.5	1376	1338.35	1263	1206.8
7.70453	3	5472	5505.09	5534	5576.29	1357	1326.56	1187	1196.35
7.75791	2	5579	5477.86	5542	5549.22	1312	1314.9	1213	1186.04
7.8113	4	5408	5450.87	5459	5522.34	1273	1303.39	1177	1175.84
7.86469	1	5374	5423.86	5479	5495.54	1261	1292.02	1243	1165.77
7.91807	0	5420	5396.96	5548	5468.8	1314	1280.79	1180	1155.82
7.97146	1	5379	5370.29	5524	5442.21	1291	1269.69	1180	1145.98
8.02485	6	5271	5344	5415	5415.97	1307	1258.96	1192	1136.33
8.07823	1	5269	5317.6	5482	5389.78	1200	1248.08	1158	1126.86
8.13162	2	5241	5291.39	5516	5363.68	1277	1237.33	1143	1117.32
8.18501	1	5219	5265.27	5316	5337.69	1233	1226.73	1150	1107.91
8.2384	1	5057	5239.3	5349	5311.83	1203	1216.26	1123	1098.62
8.29178	2	5195	5213.54	5244	5286.14	1191	1205.93	1078	1089.44
8.34517	3	5150	5187.95	5303	5260.65	1193	1195.72	1066	1080.37
8.39856	1	5126	5162.41	5094	5235.24	1262	1185.63	1121	1071.41
8.45194	2	5157	5137.08	5133	5209.96	1134	1175.66	1087	1062.55
8.50533	4	5069	5111.97	5120	5184.91	1144	1165.82	1078	1053.8
8.55872	3	5147	5086.95	5191	5159.99	1203	1156.09	1049	1045.16
8.6121	2	5017	5062.04	5119	5135.15	1127	1146.47	1074	1036.61
8.66549	7	4948	5037.49	5172	5110.6	1193	1137.42	1092	1028.29
8.71888	1	4958	5012.76	5129	5086.06	1131	1127.92	999	1020.2
8.77226	2	4985	4988.24	5088	5061.57	1147	1118.54	1001	1011.85
8.82565	4	4929	4963.94	4958	5037.31	1118	1109.3	1023	1003.61
8.87904	3	4956	4939.73	5012	5013.17	1082	1100.18	947	995.483
8.93242	3	4897	4915.64	4959	4989.14	1128	1091.18	979	987.461
8.98581	2	4996	4891.63	4921	4965.2	1079	1082.29	946	979.537
9.0392	3	4854	4867.81	4993	4941.4	1129	1073.5	938	971.708
9.09258	3	4782	4844.1	4965	4917.75	1125	1064.82	963	963.971
9.14597	0	4865	4820.38	4831	4894.11	1089	1056.24	931	956.323
9.19936	3	4804	4796.95	4860	4870.66	1042	1047.76	959	948.762
9.25274	4	4708	4773.69	4966	4847.41	1025	1039.38	950	941.285
9.30613	2	4717	4750.45	4760	4824.24	1022	1031.08	988	933.892
9.35952	2	4824	4727.33	4685	4801.15	1012	1022.89	1035	926.581
9.4129	1	4613	4704.29	4603	4778.15	1036	1014.78	932	919.349
9.46629	2	4699	4681.43	4748	4755.28	1068	1006.76	933	912.196
9.51968	2	4659	4658.68	4687	4732.55	1062	998.83	957	905.121
9.57306	1	4724	4636.01	4667	4709.91	971	990.986	950	898.122
9.62645	1	4538	4613.45	4646	4687.37	981	983.228	945	891.198
9.67984	0	4635	4590.99	4734	4664.91	927	975.554	885	884.347
9.73322	3	4658	4568.79	4653	4642.66	1034	967.963	891	877.569
9.78661	2	4505	4546.66	4602	4620.54	1013	960.454	844	870.864
9.84	1	4555	4524.59	4594	4598.49	985	953.025	886	864.228
9.89338	2	4479	4502.7	4519	4576.56	958	945.675	861	857.663
9.94677	2	4414	4480.94	4549	4554.78	973	938.404	814	851.165
10.0002	3	4469	4459.33	4541	4533.14	982	931.209	861	844.736
10.0535	1	4368	4437.72	4613	4511.56	988	924.091	887	838.373
10.1069	0	4437	4416.19	4438	4490.01	937	917.048	829	832.077
10.1603	1	4332	4394.82	4415	4468.6	897	910.078	849	825.845
10.2137	1	4401	4373.58	4578	4447.32	877	903.181	854	819.676
10.2671	2	4326	4352.5	4339	4426.19	935	896.356	774	813.571
10.3205	1	4345	4331.48	4335	4405.15	875	889.601	789	807.529
10.3739	3	4313	4310.68	4442	4384.27	846	882.916	817	801.547
10.4273	2	4350	4289.94	4336	4363.51	858	876.3	780	795.626
10.4806	2	4295	4269.31	4218	4342.83	888	869.752	802	789.765
10.534	3	4289	4248.83	4282	4322.29	830	863.271	839	783.962
10.5874	1	4223	4228.36	4363	4301.8	868	856.855	806	778.218
10.6408	2	4124	4208.06	4309	4281.43	857	850.505	765	772.531
10.6942	3	4108	4187.9	4242	4261.21	828	844.219	821	766.9
10.7476	0	4205	4167.7	4268	4241	860	837.996	784	761.325
10.801	1	4174	4147.67	4240	4220.88	855	831.835	814	755.805
10.8543	3	4140	4127.84	4241	4200.96	821	825.736	751	750.339
10.9077	2	4105	4108.06	4128	4181.13	803	819.697	784	744.927
10.9611	0	4100	4088.28	4223	4161.32	842	813.719	778	739.568
11.0145	1	4106	4068.66	4123	4141.62	826	807.799	694	734.26
11.0679	1	3999	4049.15	4223	4122.03	824	801.938	749	729.004
11.1213	2	4119	4029.8	4327	4102.58	800	796.134	753	723.799
11.1747	3	3918	4010.59	4105	4083.28	810	790.387	736	718.644
11.228	0	3972	3991.32	3968	4064	767	784.695	717	713.538
11.2814	1	3963	3972.22	4010	4044.79	804	779.059	732	708.481
11.3348	1	3886	3953.2	4075	4025.7	835	773.477	702	703.471
11.3882	0	4018	3934.24	4031	4006.67	780	767.949	755	698.51
11.4416	0	3922	3915.39	4043	3987.72	730	762.474	648	693.595
11.495	2	3929	3896.75	3911	3968.95	761	757.051	696	688.726
11.5484	3	3925	3878.25	4023	3950.34	773	751.68	663	683.904
11.6018	1	3892	3859.74	3884	3931.77	759	746.36	708	679.126
11.6552	2	3900	3841.38	3837	3913.3	735	741.09	730	674.392
11.7085	2	3788	3823.12	3904	3894.94	762	735.87	704	669.703
11.7619	2	3889	3804.95	3918	3876.67	722	730.698	675	665.057
11.8153	1	3801	3786.82	3830	3858.46	709	725.575	690	660.453
11.8687	0	3762	3768.73	3804	3840.29	705	720.5	686	655.892
11.9221	1	3761	3750.79	3876	3822.23	764	715.472	660	651.373
11.9755	1	3650	3732.95	3747	3804.28	781	710.49	680	646.894
12.0289	1	3764	3715.2	3841	3786.43	723	705.554	620	642.457
12.0822	1	3677	3697.54	3795	3768.66	709	700.663	632	638.059
12.1356	0	3703	3679.93	3812	3750.95	701	695.817	597	633.701
12.189	2	3652	3662.5	3764	3733.38	694	691.015	654	629.383
12.2424	0	3695	3645.07	3660	3715.87	730	686.257	697	625.103
12.2958	1	3697	3627.79	3765	3698.44	710	681.542	625	620.861
12.3492	2	3532	3610.63	3801	3681.16	709	676.869	662	616.656
12.4026	0	3502	3593.47	3657	3663.91	669	672.239	602	612.49
12.4559	1	3600	3576.46	3659	3646.75	705	667.649	635	608.359
12.5093	2	3578	3559.58	3649	3629.73	656	663.101	609	604.266
12.5627	2	3521	3542.79	3569	3612.82	669	658.593	577	600.208
12.6161	1	3424	3526.03	3579	3595.96	697	654.125	589	596.185
12.6695	2	3639	3509.43	3576	3579.19	691	649.696	616	592.198
12.7229	3	3494	3492.93	3502	3562.57	658	645.307	564	588.245
12.7763	0	3465	3476.38	3551	3545.94	666	640.956	613	584.326
12.8297	1	3341	3459.97	3573	3529.38	596	636.642	585	580.441
12.883	2	3453	3443.68	3491	3512.95	659	632.367	582	576.589
12.9364	0	3452	3427.4	3473	3496.55	653	628.128	581	572.771
12.9898	4	3341	3411.39	3516	3480.35	633	623.926	535	568.985
13.0432	1	3392	3395.3	3483	3464.19	629	619.76	558	565.231
13.0966	0	3379	3379.25	3468	3448.02	659	615.63	584	561.509
13.15	1	3252	3363.33	3483	3431.95	655	611.535	541	557.818
13.2034	1	3423	3347.49	3389	3415.97	648	607.475	562	554.158
13.2568	0	3279	3331.69	3354	3400.05	628	603.45	547	550.53
13.3101	1	3409	3316.02	3312	3384.22	651	599.459	560	546.931
13.3635	2	3242	3300.48	3384	3368.53	620	595.501	561	543.362
13.4169	0	3328	3284.92	3425	3352.86	602	591.577	540	539.823
13.4703	1	3225	3269.48	3251	3337.27	572	587.685	504	536.314
13.5237	0	3258	3254.08	3258	3321.74	594	583.826	527	532.833
13.5771	0	3282	3238.75	3331	3306.27	591	580	559	529.381
13.6304	0	3264	3223.5	3359	3290.87	573	576.204	534	525.957
13.6838	0	3121	3208.34	3132	3275.56	584	572.441	538	522.561
13.7372	1	3154	3193.3	3319	3260.36	548	568.708	519	519.193
13.7906	0	3222	3178.3	3256	3245.22	580	565.006	516	515.853
13.844	2	3157	3163.47	3272	3230.21	578	561.334	534	512.539
13.8974	0	3187	3148.6	3100	3215.23	578	557.693	520	509.252
13.9508	0	3122	3133.82	3198	3200.3	548	554.081	531	505.991
14.0042	0	3057	3119.12	3165	3185.44	615	550.498	530	502.757
14.0576	2	3082	3104.59	3261	3170.73	585	546.944	514	499.548
14.1109	0	3124	3090.03	3084	3156.05	537	543.419	502	496.365
14.1643	0	3145	3075.56	3245	3141.41	556	539.922	463	493.207
14.2177	2	3078	3061.25	3114	3126.92	515	536.453	493	490.074
14.2711	0	3126	3046.91	3187	3112.47	580	533.012	491	486.966
14.3245	0	3058	3032.64	3182	3098.05	527	529.598	517	483.883
14.3779	0	3006	3018.45	3002	3083.7	531	526.211	511	480.823
14.4313	0	2924	3004.33	3071	3069.42	531	522.851	487	477.788
14.4846	1	2899	2990.35	3055	3055.25	509	519.518	461	474.776
14.538	2	3018	2976.47	2952	3041.21	503	516.211	482	471.788
14.5914	0	2938	2962.57	3027	3027.18	487	512.929	488	468.822
14.6448	1	2876	2948.79	3012	3013.22	519	509.674	504	465.88
14.6982	2	3003	2935.12	3033	2999.38	483	506.443	438	462.96
14.7516	0	2911	2921.42	2839	2985.56	535	503.238	491	460.063
14.805	0	3048	2907.8	2946	2971.77	499	500.058	495	457.188
14.8583	1	2873	2894.29	2948	2958.08	494	496.902	442	454.335
14.9117	1	2749	2880.85	3078	2944.49	528	493.771	465	451.504
14.9651	1	2826	2867.48	2954	2930.95	456	490.663	437	448.694
15.0185	1	2911	2854.18	2886	2917.49	467	487.579	442	445.905
15.0719	1	2860	2840.94	2940	2904.09	462	484.519	415	443.138
15.1253	0	2920	2827.72	2810	2890.72	519	481.482	426	440.391
15.1787	2	2816	2814.67	2920	2877.47	473	478.468	475	437.665
15.2321	0	2825	2801.57	2824	2864.25	458	475.477	432	434.96
15.2854	0	2786	2788.56	2865	2851.06	468	472.509	418	432.274
15.3388	2	2691	2775.71	2767	2838.01	457	469.563	451	429.609
15.3922	2	2810	2762.92	2874	2825.06	436	466.639	402	426.963
15.4456	1	2771	2750.13	2767	2812.13	507	463.737	413	424.337
15.499	0	2699	2737.36	2761	2799.22	444	460.856	410	421.73
15.5524	0	2687	2724.66	2762	2786.35	482	457.997	426	419.143
15.6058	1	2748	2712.07	2630	2773.58	487	455.159	469	416.574
15.6592	1	2706	2699.54	2749	2760.89	450	452.342	403	414.025
15.7125	0	2757	2687.03	2703	2748.22	426	449.546	413	411.494
15.7659	1	2658	2674.64	2717	2735.64	449	446.771	413	408.981
15.8193	2	2725	2662.35	2749	2723.17	448	444.016	439	406.487
15.8727	0	2623	2650.02	2744	2710.71	429	441.281	354	404.011
15.9261	1	2569	2637.8	2686	2698.31	436	438.566	405	401.552
15.9795	0	2688	2625.61	2707	2685.96	439	435.871	409	399.112
16.0329	3	2589	2613.61	2737	2673.75	459	433.195	394	396.689
16.0862	0	2685	2601.53	2771	2661.55	452	430.539	404	394.283
16.1396	1	2703	2589.55	2604	2649.39	405	427.902	386	391.895
16.193	0	2627	2577.58	2637	2637.28	416	425.284	373	389.523
16.2464	1	2624	2565.73	2615	2625.24	393	422.685	361	387.169
16.2998	1	2561	2553.93	2575	2613.28	435	420.105	407	384.831
16.3532	0	2547	2542.14	2558	2601.34	433	417.543	420	382.51
16.4066	0	2551	2530.4	2673	2589.43	402	414.999	402	380.205
16.4599	0	2436	2518.73	2614	2577.59	442	412.473	375	377.916
16.5133	0	2495	2507.11	2494	2565.81	437	409.966	364	375.644
16.5667	0	2560	2495.56	2624	2554.08	448	407.476	382	373.388
16.6201	1	2472	2484.12	2556	2542.45	428	405.004	369	371.147
16.6735	2	2564	2472.78	2562	2530.93	433	402.549	363	368.922
16.7269	0	2434	2461.4	2584	2519.42	414	400.111	336	366.712
16.7803	1	2481	2450.12	2512	2507.95	429	397.691	361	364.518
16.8337	0	2472	2438.85	2532	2496.53	413	395.287	353	362.339
16.887	2	2376	2427.73	2403	2485.21	389	392.901	332	360.176
16.9404	0	2455	2416.57	2471	2473.92	368	390.531	353	358.027
16.9938	1	2370	2405.51	2472	2462.67	365	388.177	357	355.893
17.0472	0	2362	2394.45	2442	2451.47	348	385.84	382	353.773
17.1006	0	2448	2383.46	2465	2440.3	350	383.519	344	351.668
17.154	1	2273	2372.57	2371	2429.22	396	381.214	352	349.578
17.2074	1	2327	2361.73	2413	2418.22	402	378.925	346	347.502
17.2608	0	2417	2350.9	2473	2407.23	398	376.652	350	345.44
17.3141	2	2385	2340.22	2294	2396.34	345	374.394	358	343.392
17.3675	1	2298	2329.53	2350	2385.52	367	372.152	334	341.358
17.4209	0	2204	2318.85	2356	2374.69	364	369.925	335	339.338
17.4743	0	2285	2308.22	2370	2363.89	371	367.714	361	337.331
17.5277	0	2220	2297.64	2318	2353.14	365	365.517	353	335.338
17.5811	0	2225	2287.13	2350	2342.45	347	363.335	330	333.358
17.6345	2	2257	2276.76	2339	2331.88	370	361.168	321	331.392
17.6878	1	2297	2266.39	2394	2321.37	336	359.016	283	329.439
17.7412	0	2224	2256.03	2278	2310.85	343	356.879	329	327.498
17.7946	2	2227	2245.81	2286	2300.43	323	354.755	317	325.571
17.848	0	2218	2235.54	2286	2290.03	357	352.646	320	323.657
17.9014	1	2251	2225.37	2381	2279.68	339	350.552	300	321.755
17.9548	1	2273	2215.25	2317	2269.39	327	348.471	323	319.866
18.0082	0	2207	2205.13	2267	2259.12	293	346.404	326	317.99
18.0616	1	2233	2195.11	2261	2248.92	341	344.351	333	316.126
18.1149	0	2265	2185.09	2193	2238.75	348	342.312	323	314.274
18.1683	1	2203	2175.16	2242	2228.65	305	340.286	309	312.435
18.2217	0	2195	2165.24	2285	2218.57	344	338.274	309	310.607
18.2751	0	2216	2155.36	2258	2208.53	333	336.275	317	308.792
18.3285	1	2150	2145.58	2228	2198.57	336	334.289	288	306.988
18.3819	0	2134	2135.81	2127	2188.64	301	332.316	333	305.197
18.4353	1	2041	2126.12	2142	2178.78	348	330.357	304	303.417
18.4886	0	2113	2116.44	2125	2168.94	323	328.41	304	301.648
18.542	1	2027	2106.85	2166	2159.18	322	326.476	296	299.891
18.5954	0	2124	2097.26	2166	2149.44	324	324.555	328	298.146
18.6488	1	2058	2087.76	2154	2139.76	341	322.646	277	296.411
18.7022	0	2055	2078.27	2171	2130.12	345	320.75	311	294.688
18.7556	1	2025	2068.86	2080	2120.53	320	318.866	304	292.977
18.809	0	2030	2059.46	2124	2110.98	293	316.994	304	291.276
18.8623	1	2023	2050.15	2081	2101.49	276	315.135	312	289.586
18.9157	0	2039	2040.83	2089	2092.03	318	313.288	326	287.907
18.9691	0	1980	2031.56	2046	2082.59	322	311.452	281	286.239
19.0225	2	1972	2022.44	2032	2073.27	294	309.629	247	284.581
19.0759	1	1937	2013.31	2014	2064	295	307.817	276	282.934
19.1293	0	1985	2004.17	2160	2054.71	316	306.017	285	281.298
19.1827	1	2008	1995.13	2042	2045.49	284	304.229	278	279.672
19.2361	0	2045	1986.07	2007	2036.3	288	302.452	285	278.057
19.2894	0	2015	1977.06	1985	2027.12	332	300.686	275	276.451
19.3428	0	1996	1968.1	2003	2018	275	298.932	299	274.856
19.3962	1	1999	1959.23	2029	2008.95	292	297.189	275	273.271
19.4496	0	1986	1950.35	1946	1999.93	308	295.457	288	271.696
19.503	0	1960	1941.51	1856	1990.93	290	293.736	259	270.131
19.5564	0	1936	1932.72	1947	1981.98	277	292.027	275	268.576
19.6098	1	1908	1924.03	1983	1973.11	296	290.328	255	267.031
19.6632	1	1888	1915.38	1894	1964.29	276	288.639	264	265.495
19.7165	1	1909	1906.77	1957	1955.52	298	286.962	255	263.969
19.7699	2	1855	1898.24	1923	1946.83	291	285.295	282	262.453
19.8233	0	1931	1889.65	1940	1938.12	270	283.639	279	260.946
19.8767	0	1861	1881.11	1924	1929.42	273	281.993	217	259.448
19.9301	0	1941	1872.6	1927	1920.75	280	280.358	252	257.96
19.9835	0	2002	1864.14	1852	1912.13	271	278.733	254	256.481
20.0369	1	1846	1855.77	1944	1903.59	269	277.118	224	255.012
20.0903	0	1861	1847.39	1843	1895.07	247	275.513	239	253.551
20.1436	0	1756	1839.05	1889	1886.57	287	273.918	254	252.1
20.197	0	1862	1830.74	1921	1878.11	285	272.334	279	250.657
20.2504	0	1850	1822.49	1804	1869.7	267	270.759	235	249.224
20.3038	1	1805	1814.32	1859	1861.35	255	269.194	261	247.799
20.3572	0	1805	1806.13	1934	1853.03	294	267.639	254	246.384
20.4106	0	1811	1797.99	1893	1844.74	293	266.094	251	244.977
20.464	1	1790	1789.94	1785	1836.51	249	264.558	223	243.578
20.5173	0	1805	1781.88	1878	1828.31	251	263.032	231	242.188
20.5707	1	1698	1773.9	1842	1820.17	295	261.515	213	240.807
20.6241	0	1702	1765.91	1814	1812.04	278	260.007	231	239.435
20.6775	0	1753	1757.96	1825	1803.94	257	258.509	228	238.07
20.7309	0	1820	1750.04	1810	1795.87	230	257.021	231	236.714
20.7843	0	1799	1742.17	1781	1787.84	259	255.541	223	235.367
20.8377	1	1726	1734.38	1785	1779.89	258	254.071	221	234.027
20.891	0	1732	1726.58	1755	1771.95	244	252.61	237	232.696
20.9444	0	1800	1718.82	1771	1764.04	244	251.157	204	231.373
20.9978	0	1702	1711.09	1756	1756.16	226	249.714	208	230.058
21.0512	0	1711	1703.4	1723	1748.32	233	248.279	223	228.751
21.1046	0	1668	1695.74	1788	1740.51	240	246.854	234	227.452
21.158	0	1670	1688.13	1651	1732.75	229	245.437	218	226.161
21.2114	0	1714	1680.55	1747	1725.02	231	244.029	235	224.878
21.2648	0	1692	1673	1732	1717.32	254	242.629	207	223.602
21.3181	0	1701	1665.49	1742	1709.66	247	241.238	215	222.334
21.3715	0	1670	1658.03	1737	1702.04	240	239.855	206	221.074
21.4249	1	1707	1650.64	1686	1694.49	245	238.481	218	219.822
21.4783	0	1638	1643.24	1639	1686.96	216	237.116	189	218.577
21.5317	0	1690	1635.87	1699	1679.45	227	235.758	183	217.339
21.5851	0	1695	1628.54	1667	1671.97	257	234.409	203	216.109
21.6385	1	1682	1621.3	1663	1664.56	233	233.068	198	214.887
21.6918	1	1608	1614.09	1763	1657.2	224	231.735	233	213.671
21.7452	1	1574	1606.93	1605	1649.88	242	230.411	213	212.463
21.7986	3	1595	1599.89	1645	1642.67	238	229.094	212	211.263
21.852	0	1651	1592.72	1646	1635.41	233	227.785	204	210.069
21.9054	1	1588	1585.64	1644	1628.17	227	226.484	173	208.883
21.9588	0	1517	1578.54	1618	1620.95	233	225.191	198	207.704
22.0122	0	1570	1571.48	1664	1613.74	211	223.906	197	206.531
22.0656	1	1509	1564.5	1602	1606.6	221	222.629	192	205.366
22.1189	0	1593	1557.5	1546	1599.48	221	221.359	194	204.208
22.1723	0	1536	1550.54	1611	1592.37	223	220.097	200	203.057
22.2257	1	1572	1543.65	1598	1585.33	239	218.843	202	201.912
22.2791	0	1559	1536.75	1606	1578.31	219	217.596	214	200.774
22.3325	0	1561	1529.88	1590	1571.3	212	216.357	209	199.644
22.3859	0	1553	1523.05	1603	1564.32	221	215.125	196	198.519
22.4393	0	1567	1516.25	1626	1557.38	202	213.9	177	197.402
22.4927	1	1508	1509.53	1596	1550.5	212	212.683	184	196.291
22.546	0	1497	1502.79	1561	1543.64	216	211.473	173	195.187
22.5994	1	1554	1496.14	1540	1536.83	201	210.271	189	194.089
22.6528	0	1380	1489.46	1551	1530.03	230	209.075	190	192.998
22.7062	1	1514	1482.88	1548	1523.29	188	207.887	192	191.913
22.7596	1	1501	1476.31	1501	1516.59	208	206.706	165	190.834
22.813	0	1462	1469.72	1533	1509.88	195	205.532	172	189.762
22.8664	0	1475	1463.18	1493	1503.19	199	204.364	183	188.697
22.9197	2	1420	1456.76	1530	1496.61	213	203.204	189	187.637
22.9731	0	1446	1450.27	1521	1490.01	211	202.051	183	186.584
23.0265	0	1409	1443.8	1443	1483.41	187	200.904	184	185.537
23.0799	0	1474	1437.37	1456	1476.85	164	199.765	177	184.496
23.1333	1	1461	1431.02	1498	1470.34	187	198.632	170	183.461
23.1867	0	1375	1424.65	1468	1463.86	202	197.506	197	182.433
23.2401	0	1385	1418.3	1462	1457.38	157	196.386	169	181.41
23.2934	0	1389	1411.99	1447	1450.93	203	195.274	192	180.393
23.3468	0	1458	1405.71	1481	1444.51	169	194.167	210	179.383
23.4002	0	1416	1399.45	1468	1438.13	179	193.068	201	178.378
23.4536	0	1424	1393.23	1440	1431.77	197	191.975	162	177.379
23.507	0	1397	1387.04	1439	1425.44	211	190.888	155	176.386
23.5604	1	1359	1380.93	1478	1419.18	219	189.808	176	175.399
23.6138	0	1381	1374.79	1381	1412.93	192	188.734	181	174.417
23.6672	0	1353	1368.68	1424	1406.69	177	187.666	163	173.442
23.7205	0	1368	1362.6	1419	1400.48	177	186.605	150	172.472
23.7739	1	1376	1356.6	1386	1394.33	183	185.55	182	171.507
23.8273	0	1310	1350.58	1413	1388.2	166	184.501	179	170.548
23.8807	0	1397	1344.58	1414	1382.07	181	183.458	164	169.595
23.9341	0	1340	1338.62	1370	1375.97	167	182.422	171	168.648
23.9875	1	1374	1332.73	1364	1369.94	147	181.392	156	167.706
24.0409	0	1333	1326.81	1397	1363.91	176	180.367	145	166.769
24.0942	0	1338	1320.93	1345	1357.9	186	179.349	162	165.838
24.1476	0	1243	1315.08	1408	1351.91	187	178.337	158	164.912
24.201	1	1364	1309.3	1380	1345.99	189	177.33	137	163.991
24.2544	1	1352	1303.55	1325	1340.12	189	176.33	164	163.076
24.3078	0	1357	1297.78	1374	1334.23	167	175.335	164	162.166
24.3612	2	1301	1292.13	1344	1328.42	174	174.346	167	161.262
24.4146	0	1329	1286.4	1304	1322.61	169	173.363	155	160.363
24.468	0	1322	1280.7	1282	1316.78	155	172.386	166	159.469
24.5214	0	1265	1275.03	1353	1310.99	168	171.414	168	158.58
24.5747	1	1237	1269.44	1252	1305.25	180	170.448	138	157.696
24.6281	1	1300	1263.87	1264	1299.56	194	169.488	156	156.817
24.6815	0	1169	1258.27	1263	1293.86	170	168.533	163	155.943
24.7349	0	1228	1252.7	1297	1288.17	160	167.584	144	155.075
24.7883	0	1301	1247.16	1247	1282.5	177	166.641	138	154.211
24.8417	0	1294	1241.64	1264	1276.86	155	165.703	148	153.353
24.8951	0	1275	1236.15	1310	1271.24	147	164.77	163	152.499
24.9484	0	1259	1230.69	1277	1265.66	161	163.843	160	151.65
25.0018	1	1169	1225.3	1290	1260.13	161	162.921	150	150.806
25.0552	0	1217	1219.88	1243	1254.61	141	162.005	129	149.967
25.1086	0	1222	1214.49	1241	1249.1	143	161.094	157	149.133
25.162	1	1174	1209.18	1168	1243.65	154	160.188	160	148.304
25.2154	0	1204	1203.83	1272	1238.2	172	159.288	139	147.479
25.2688	0	1151	1198.51	1172	1232.77	152	158.392	144	146.659
25.3222	0	1227	1193.22	1198	1227.35	168	157.502	135	145.844
25.3755	0	1217	1187.95	1223	1221.97	162	156.618	152	145.034
25.4289	0	1180	1182.71	1240	1216.6	153	155.738	147	144.228
25.4823	0	1164	1177.49	1222	1211.27	165	154.863	157	143.427
25.5357	0	1102	1172.29	1210	1205.95	143	153.993	118	142.63
25.5891	0	1150	1167.12	1212	1200.66	155	153.129	129	141.838
25.6425	0	1226	1161.97	1200	1195.4	162	152.269	161	141.05
25.6959	0	1162	1156.85	1289	1190.16	139	151.415	128	140.267
25.7492	0	1189	1151.75	1229	1184.94	137	150.565	140	139.489
25.8026	0	1111	1146.68	1251	1179.75	147	149.72	135	138.714
25.856	1	1161	1141.68	1177	1174.62	132	148.881	133	137.945
25.9094	0	1121	1136.64	1171	1169.49	147	148.046	123	137.179
25.9628	0	1110	1131.64	1160	1164.37	160	147.216	137	136.418
26.0162	1	1144	1126.71	1129	1159.31	141	146.39	160	135.662
26.0696	0	1119	1121.75	1160	1154.25	141	145.57	121	134.91
26.1229	0	1128	1116.81	1157	1149.2	143	144.754	145	134.162
26.1763	0	1081	1111.89	1209	1144.17	147	143.943	133	133.418
26.2297	1	1094	1107.05	1146	1139.2	125	143.136	153	132.678
26.2831	0	1151	1102.18	1127	1134.23	142	142.334	125	131.943
26.3365	1	1068	1097.38	1150	1129.3	138	141.537	131	131.212
26.3899	0	1076	1092.56	1161	1124.38	131	140.744	132	130.485
26.4433	1	1100	1087.8	1081	1119.5	133	139.956	138	129.762
26.4966	0	1082	1083.02	1084	1114.62	138	139.173	138	129.044
26.55	0	1071	1078.25	1095	1109.75	130	138.394	130	128.329
26.6034	0	1129	1073.51	1137	1104.9	148	137.619	147	127.618
26.6568	0	1043	1068.79	1056	1100.07	147	136.849	142	126.912
26.7102	0	1053	1064.09	1124	1095.26	123	136.084	128	126.209
26.7636	0	1087	1059.41	1123	1090.48	126	135.322	143	125.511
26.817	0	1093	1054.76	1108	1085.71	134	134.566	129	124.816
26.8704	0	1022	1050.13	1078	1080.97	131	133.813	128	124.126
26.9237	0	1023	1045.51	1096	1076.25	162	133.065	115	123.439
26.9771	0	1055	1040.92	1043	1071.55	129	132.321	121	122.756
27.0305	0	1048	1036.35	1077	1066.88	136	131.581	106	122.077
27.0839	0	1001	1031.8	1046	1062.22	138	130.846	142	121.402
27.1373	0	1048	1027.27	1038	1057.59	134	130.115	124	120.731
27.1907	0	1065	1022.77	1033	1052.97	128	129.388	136	120.064
27.2441	0	998	1018.28	1060	1048.38	117	128.665	137	119.4
27.2975	0	1018	1013.81	1079	1043.81	119	127.946	112	118.74
27.3508	0	1019	1009.37	1067	1039.26	121	127.232	127	118.084
27.4042	0	1048	1004.94	1069	1034.73	123	126.521	109	117.432
27.4576	0	1026	1000.54	1005	1030.22	142	125.815	132	116.783
27.511	0	1016	996.15	1114	1025.73	109	125.113	126	116.138
27.5644	0	966	991.785	1029	1021.26	100	124.414	127	115.496
27.6178	0	970	987.445	1056	1016.81	135	123.72	109	114.858
27.6712	1	998	983.171	994	1012.42	136	123.03	130	114.224
27.7246	0	948	978.863	996	1008.03	110	122.343	101	113.594
27.7779	0	963	974.575	982	1003.64	106	121.661	115	112.966
27.8313	0	953	970.307	992	999.271	130	120.982	110	112.343
27.8847	0	904	966.064	941	994.922	111	120.307	102	111.723
27.9381	1	1015	961.886	1000	990.628	128	119.637	87	111.106
27.9915	0	994	957.674	1039	986.335	110	118.97	101	110.493
28.0449	0	998	953.482	1011	982.043	113	118.306	101	109.884
28.0983	0	925	949.309	1022	977.771	113	117.647	110	109.278
28.1516	0	941	945.167	991	973.518	103	116.991	101	108.675
28.205	2	910	941.135	945	969.357	102	116.339	101	108.075
28.2584	0	976	937.016	995	965.178	114	115.691	113	107.48
28.3118	0	976	932.915	906	960.981	115	115.047	105	106.887
28.3652	0	936	928.834	939	956.802	118	114.406	107	106.298
28.4186	0	956	924.777	1017	952.643	105	113.769	99	105.712
28.472	1	939	920.785	965	948.538	93	113.135	113	105.129
28.5253	0	964	916.758	962	944.434	95	112.505	109	104.55
28.5787	0	907	912.749	949	940.33	119	111.879	74	103.974
28.6321	0	954	908.759	950	936.245	108	111.256	85	103.401
28.6855	0	918	904.787	935	932.177	101	110.637	80	102.831
28.7389	0	883	900.852	991	928.129	100	110.021	120	102.265
28.7923	3	909	897.071	913	924.208	111	109.409	83	101.701
28.8457	0	931	893.155	940	920.249	110	108.8	106	101.141
28.8991	1	898	889.303	940	916.289	125	108.195	93	100.584
28.9524	0	904	885.416	857	912.328	125	107.593	100	100.03
29.0058	0	852	881.546	923	908.367	117	106.995	95	99.4797
29.0592	0	872	877.695	889	904.423	106	106.4	89	98.9321
29.1126	0	832	873.868	947	900.498	109	105.808	92	98.3875
29.166	1	883	870.104	901	896.626	106	105.22	90	97.846
29.2194	0	885	866.31	915	892.754	89	104.635	111	97.3076
29.2728	1	827	862.579	903	888.917	96	104.054	107	96.7722
29.3261	0	850	858.813	947	885.08	100	103.475	103	96.2397
29.3795	0	846	855.064	927	881.24	115	102.9	85	95.7103
29.4329	0	874	851.339	846	877.419	80	102.329	85	95.1838
29.4863	1	840	847.676	905	873.651	103	101.76	87	94.6603
29.5397	0	863	843.977	872	869.881	114	101.195	89	94.1397
29.5931	0	771	840.296	872	866.11	105	100.633	92	93.6221
29.6465	0	877	836.631	824	862.356	108	100.074	102	93.1073
29.6999	0	831	832.983	861	858.619	100	99.5184	110	92.5954
29.7532	0	823	829.351	889	854.899	99	98.9659	95	92.0864
29.8066	0	810	825.737	849	851.196	104	98.4165	110	91.5803
29.86	0	829	822.138	816	847.51	83	97.8703	94	91.0769
29.9134	0	766	818.557	852	843.84	93	97.3271	89	90.5764
29.9668	0	800	814.991	883	840.186	100	96.787	86	90.0787
30.0202	0	776	811.442	836	836.55	105	96.25	74	89.5838
30.0736	0	808	807.908	787	832.929	93	95.7161	80	89.0917
30.127	0	806	804.391	807	829.325	89	95.1851	85	88.6023
30.1803	0	821	800.89	785	825.737	98	94.6572	95	88.1156
30.2337	0	763	797.404	757	822.165	81	94.1323	97	87.6317
30.2871	0	780	793.934	883	818.609	71	93.6103	70	87.1504
30.3405	0	800	790.48	817	815.069	90	93.0913	95	86.6719
30.3939	0	798	787.041	822	811.544	85	92.5752	86	86.196
30.4473	0	778	783.618	830	808.036	103	92.0621	74	85.7228
30.5007	0	809	780.21	807	804.543	74	91.5519	111	85.2523
30.554	0	787	776.818	799	801.066	81	91.0445	70	84.7844
30.6074	0	765	773.44	814	797.605	98	90.54	85	84.3191
30.6608	0	786	770.078	823	794.159	83	90.0384	70	83.8564
30.7142	0	711	766.731	789	790.728	80	89.5397	73	83.3962
30.7676	0	790	763.399	804	787.313	87	89.0437	77	82.9387
30.821	0	768	760.082	779	783.913	70	88.5506	92	82.4837
30.8744	0	750	756.78	787	780.528	105	88.0602	72	82.0312
30.9277	0	739	753.511	773	777.158	77	87.5726	84	81.5813
30.9811	3	706	750.393	777	773.912	87	87.0878	83	81.1339
31.0345	0	719	747.131	792	770.626	86	86.6057	63	80.689
31.0879	0	788	743.883	765	767.298	91	86.1264	75	80.2466
31.1413	0	710	740.65	733	763.985	87	85.6497	84	79.8066
31.1947	0	689	737.439	792	760.687	83	85.1758	83	79.3691
31.2481	1	730	734.287	736	757.441	66	84.7045	81	78.934
31.3015	0	779	731.097	752	754.19	80	84.2359	86	78.5014
31.3548	0	696	727.927	808	750.935	80	83.77	70	78.0712
31.4082	1	740	724.817	717	747.731	84	83.3067	71	77.6433
31.4616	0	702	721.669	771	744.524	83	82.846	82	77.2179
31.515	0	729	718.535	749	741.312	86	82.3879	81	76.7948
31.5684	0	683	715.416	731	738.114	84	81.9324	87	76.3741
31.6218	0	708	712.31	745	734.93	105	81.4794	67	75.9558
31.6752	0	728	709.225	790	731.761	95	81.0291	78	75.5397
31.7285	1	738	706.199	712	728.643	98	80.5812	74	75.126
31.7819	0	701	703.134	729	725.52	79	80.1359	81	74.7146
31.8353	0	675	700.089	710	722.392	82	79.6931	73	74.3055
31.8887	1	753	697.103	680	719.315	71	79.2529	65	73.8987
31.9421	0	716	694.079	674	716.233	73	78.8151	75	73.4941
31.9955	0	712	691.068	702	713.146	78	78.3797	74	73.0918
32.0489	0	705	688.076	696	710.073	87	77.9469	80	72.6917
32.1023	1	682	685.15	674	707.051	78	77.5164	65	72.2939
32.1557	1	699	682.23	669	704.059	88	77.0884	85	71.8983
32.209	0	676	679.27	689	701.044	89	76.6629	77	71.5049
32.2624	0	672	676.324	689	698.024	65	76.2397	66	71.1136
32.3158	0	667	673.392	704	695.018	84	75.8189	67	70.7246
32.3692	0	702	670.473	681	692.025	77	75.4005	59	70.3377
32.4226	0	670	667.567	741	689.045	75	74.9844	86	69.953
32.476	0	685	664.674	666	686.078	76	74.5707	72	69.5704
32.5294	0	611	661.8	720	683.125	68	74.1594	77	69.1899
32.5827	1	674	658.985	681	680.222	70	73.7503	62	68.8116
32.6361	0	708	656.13	663	677.313	73	73.3436	61	68.4354
32.6895	0	664	653.287	678	674.398	73	72.9391	61	68.0612
32.7429	0	627	650.458	640	671.496	67	72.537	53	67.6892
32.7963	0	677	647.641	679	668.608	58	72.1371	68	67.3192
32.8497	0	644	644.837	680	665.732	83	71.7394	72	66.9513
32.9031	0	616	642.046	645	662.869	55	71.344	62	66.5854
32.9564	0	648	639.267	655	660.019	62	70.9508	65	66.2215
33.0098	0	646	636.501	669	657.181	76	70.5599	78	65.8597
33.0632	0	638	633.747	689	654.356	63	70.1711	62	65.4999
33.1166	0	596	631.006	643	651.544	62	69.7845	77	65.1421
33.17	0	615	628.276	634	648.744	70	69.4002	60	64.7863
33.2234	0	608	625.559	589	645.956	83	69.0179	53	64.4324
33.2768	0	632	622.854	649	643.181	73	68.6379	79	64.0806
33.3302	0	653	620.161	638	640.418	70	68.26	59	63.7306
33.3835	0	609	617.48	651	637.667	69	67.8842	59	63.3827
33.4369	0	629	614.811	664	634.929	70	67.5105	63	63.0367
33.4903	0	599	612.154	651	632.203	61	67.1389	69	62.6925
33.5437	0	657	609.509	606	629.488	57	66.7695	74	62.3503
33.5971	0	620	606.875	667	626.786	59	66.4021	61	62.01
33.6505	0	597	604.253	649	624.096	58	66.0367	54	61.6716
33.7039	0	596	601.649	627	621.417	59	65.6735	69	61.3351
33.7572	1	577	599.102	614	618.787	62	65.3123	53	61.0005
33.8106	0	594	596.513	646	616.15	70	64.9531	56	60.6677
33.864	0	602	593.936	599	613.506	59	64.5959	71	60.3367
33.9174	0	594	591.371	574	610.873	72	64.2408	69	60.0076
33.9708	0	572	588.816	633	608.252	55	63.8876	66	59.6803
34.0242	0	551	586.274	564	605.643	53	63.5365	69	59.3549
34.0776	0	570	583.742	581	603.045	59	63.1873	55	59.0312
34.131	0	593	581.222	596	600.459	55	62.84	67	58.7094
34.1843	0	566	578.713	563	597.884	68	62.4948	49	58.3893
34.2377	0	599	576.215	597	595.321	65	62.1515	73	58.071
34.2911	0	594	573.728	607	592.769	64	61.8101	48	57.7545
34.3445	0	558	571.253	571	590.228	52	61.4706	65	57.4397
34.3979	0	599	568.788	556	587.698	65	61.133	54	57.1267
34.4513	0	566	566.334	540	585.179	55	60.7974	56	56.8154
34.5047	0	555	563.891	592	582.672	65	60.4636	66	56.5059
34.5581	0	528	561.459	602	580.175	50	60.1317	41	56.198
34.6114	0	559	559.037	569	577.69	69	59.8017	49	55.8919
34.6648	0	573	556.626	551	575.215	74	59.4736	60	55.5875
34.7182	0	538	554.232	600	572.751	81	59.1472	56	55.2848
34.7716	1	514	551.9	564	570.335	64	58.8228	60	54.9837
34.825	1	563	549.571	579	567.947	66	58.5001	64	54.6843
34.8784	0	556	547.2	561	565.532	64	58.1793	49	54.3866
34.9318	0	541	544.839	546	563.11	69	57.8602	64	54.0905
34.9851	0	554	542.489	553	560.698	48	57.543	59	53.7961
35.0385	0	511	540.156	563	558.297	48	57.2276	60	53.5033
35.0919	1	502	537.878	522	555.943	70	56.9139	48	53.2122
35.1453	0	532	535.558	570	553.58	52	56.602	46	52.9226
35.1987	0	490	533.248	544	551.21	58	56.2918	61	52.6347
35.2521	0	501	530.955	534	548.85	53	55.9834	56	52.3483
35.3055	1	513	528.724	495	546.537	60	55.6767	59	52.0636
35.3588	1	542	526.495	551	544.252	65	55.3717	57	51.7804
35.4122	0	503	524.223	524	541.94	57	55.0685	53	51.4988
35.4656	0	523	521.969	536	539.62	54	54.767	55	51.2187
35.519	1	504	519.769	535	537.346	52	54.4671	53	50.9402
35.5724	0	514	517.527	566	535.064	67	54.169	56	50.6633
35.6258	0	484	515.295	574	532.773	66	53.8725	50	50.3879
35.6792	0	554	513.074	535	530.493	54	53.5777	51	50.114
35.7326	0	517	510.862	525	528.223	57	53.2845	49	49.8417
35.7859	0	519	508.66	559	525.963	50	52.993	55	49.5708
35.8393	0	527	506.468	541	523.712	48	52.7032	48	49.3015
35.8927	0	499	504.286	539	521.472	58	52.4149	41	49.0336
35.9461	0	525	502.114	496	519.242	39	52.1283	58	48.7672
35.9995	0	492	499.952	541	517.021	55	51.8433	42	48.5023
36.0529	0	476	497.805	496	514.811	54	51.5599	49	48.2389
36.1063	1	487	495.713	515	512.646	51	51.2781	54	47.9769
36.1596	0	497	493.578	486	510.473	55	50.9979	41	47.7164
36.213	0	506	491.453	522	508.291	43	50.7192	52	47.4574
36.2664	0	485	489.343	498	506.118	58	50.4421	45	47.1997
36.3198	1	456	487.288	463	503.991	40	50.1666	45	46.9435
36.3732	0	475	485.195	507	501.855	42	49.8926	50	46.6887
36.4266	1	492	483.157	508	499.746	43	49.6202	41	46.4354
36.48	0	480	481.076	453	497.629	41	49.3493	51	46.1834
36.5334	0	524	479.005	502	495.501	55	49.0799	45	45.9328
36.5867	0	491	476.942	450	493.384	68	48.812	50	45.6837
36.6401	0	475	474.889	501	491.275	48	48.5457	41	45.4359
36.6935	0	489	472.845	481	489.176	53	48.2808	50	45.1894
36.7469	0	429	470.817	445	487.087	45	48.0174	36	44.9444
36.8003	1	459	468.842	488	485.043	45	47.7555	49	44.7007
36.8537	0	472	466.824	458	482.989	47	47.4951	50	44.4583
36.9071	0	512	464.815	493	480.926	40	47.2361	52	44.2173
36.9605	0	479	462.816	464	478.872	49	46.9786	39	43.9776
37.0138	0	486	460.831	471	476.827	45	46.7225	36	43.7393
37.0672	1	454	458.9	473	474.827	38	46.4679	51	43.5023
37.1206	0	466	456.925	444	472.818	51	46.2147	56	43.2666
37.174	0	482	454.96	496	470.799	45	45.9629	43	43.0322
37.2274	0	439	453.003	456	468.789	42	45.7126	51	42.7991
37.2808	0	446	451.055	437	466.788	53	45.4636	54	42.5673
37.3342	0	456	449.115	468	464.796	53	45.2161	51	42.3367
37.3875	0	462	447.185	473	462.812	59	44.9699	38	42.1075
37.4409	0	462	445.262	485	460.838	54	44.7251	41	41.8795
37.4943	0	455	443.349	479	458.871	64	44.4817	42	41.6528
37.5477	0	454	441.444	432	456.914	52	44.2397	38	41.4273
37.6011	0	449	439.553	431	454.965	49	43.999	53	41.2031
37.6545	1	450	437.716	499	453.061	38	43.7597	40	40.9801
37.7079	0	433	435.835	431	451.147	44	43.5217	51	40.7584
37.7612	0	406	433.974	443	449.223	42	43.285	44	40.5379
37.8146	2	436	432.212	444	447.38	48	43.0497	36	40.3186
37.868	0	404	430.353	422	445.508	41	42.8157	46	40.1005
37.9214	0	432	428.502	423	443.607	49	42.5831	47	39.8837
37.9748	0	448	426.66	428	441.715	53	42.3517	45	39.668
38.0282	0	408	424.832	453	439.831	36	42.1216	44	39.4535
38.0816	1	402	423.064	416	437.991	47	41.8928	41	39.2403
38.135	1	433	421.296	429	436.178	40	41.6653	31	39.0281
38.1883	0	410	419.49	477	434.336	50	41.4391	33	38.8172
38.2417	1	408	417.738	421	432.519	41	41.2141	40	38.6075
38.2951	0	413	415.941	456	430.692	48	40.9905	41	38.3989
38.3485	0	409	414.152	416	428.855	47	40.768	40	38.1914
38.4019	0	415	412.371	482	427.026	42	40.5468	35	37.9851
38.4553	0	440	410.599	450	425.205	41	40.3269	48	37.78
38.5087	0	424	408.834	458	423.392	47	40.1082	36	37.576
38.562	0	440	407.078	429	421.587	54	39.8907	35	37.3731
38.6154	0	384	405.329	433	419.79	40	39.6745	32	37.1713
38.6688	0	410	403.589	448	418.001	36	39.4594	35	36.9707
38.7222	0	369	401.856	439	416.22	37	39.2456	39	36.7712
38.7756	0	355	400.131	436	414.446	41	39.0329	43	36.5727
38.829	0	406	398.413	418	412.681	54	38.8215	45	36.3754
38.8824	0	370	396.709	448	410.923	45	38.6112	38	36.1792
38.9358	1	424	395.059	425	409.21	42	38.4022	43	35.984
38.9892	0	388	393.362	437	407.485	47	38.1943	33	35.79
39.0425	0	397	391.674	406	405.75	48	37.9875	32	35.597
39.0959	0	382	389.993	428	404.022	37	37.782	27	35.4051
39.1493	0	355	388.319	393	402.301	40	37.5775	30	35.2142
39.2027	0	384	386.653	390	400.588	29	37.3743	39	35.0244
39.2561	0	373	384.995	419	398.883	38	37.1721	39	34.8356
39.3095	0	381	383.343	399	397.185	39	36.9711	28	34.6479
39.3629	0	395	381.705	412	395.495	40	36.7713	39	34.4612
39.4162	1	392	380.12	425	393.848	31	36.5725	35	34.2756
39.4696	0	392	378.489	401	392.19	30	36.3749	41	34.091
39.523	0	367	376.865	370	390.521	35	36.1784	34	33.9074
39.5764	0	375	375.249	382	388.859	31	35.983	27	33.7248
39.6298	0	377	373.64	380	387.204	34	35.7886	44	33.5433
39.6832	0	355	372.038	401	385.557	29	35.5954	29	33.3627
39.7366	0	383	370.442	376	383.917	30	35.4033	44	33.1832
39.7899	0	351	368.854	376	382.284	32	35.2122	31	33.0046
39.8433	0	354	367.274	357	380.658	33	35.0222	37	32.827
39.8967	0	331	365.699	372	379.039	35	34.8333	36	32.6504
39.9501	0	359	364.132	341	377.427	43	34.6454	31	32.4748
40.0035	0	340	362.572	355	375.822	43	34.4586	37	32.3002
40.0569	0	375	361.019	391	374.224	39	34.2728	32	32.1265
40.1103	0	334	359.472	388	372.634	27	34.0881	26	31.9538
40.1636	0	367	357.939	389	371.05	29	33.9044	35	31.782
40.217	1	344	356.457	355	369.509	37	33.7218	31	31.6112
40.2704	0	345	354.935	397	367.957	31	33.5401	32	31.4414
40.3238	1	385	353.466	371	366.429	23	33.3595	31	31.2724
40.3772	0	327	351.95	337	364.889	29	33.1799	33	31.1044
40.4306	0	366	350.441	380	363.338	50	33.0013	31	30.9374
40.484	0	377	348.939	316	361.793	35	32.8237	24	30.7713
40.5374	0	340	347.443	320	360.255	33	32.6471	24	30.606
40.5907	0	372	345.955	380	358.724	46	32.4715	34	30.4417
40.6441	0	369	344.479	384	357.199	31	32.2969	27	30.2784
40.6975	1	316	343.06	358	355.718	40	32.1233	39	30.1159
40.7509	1	349	341.641	360	354.261	39	31.9506	37	29.9543
40.8043	0	351	340.176	381	352.773	32	31.7789	36	29.7936
40.8577	0	314	338.717	337	351.273	36	31.6082	26	29.6338
40.9111	0	369	337.271	340	349.779	45	31.4384	36	29.4749
40.9645	1	380	335.877	329	348.329	29	31.2696	35	29.3168
41.0178	0	330	334.436	359	346.867	26	31.1017	33	29.1597
41.0712	0	336	333.002	351	345.392	28	30.9348	31	29.0034
41.1246	0	304	331.575	331	343.924	32	30.7688	32	28.8479
41.178	0	302	330.154	315	342.462	30	30.6038	29	28.6934
41.2314	0	307	328.739	338	341.007	35	30.4396	38	28.5397
41.2848	0	285	327.331	333	339.558	21	30.2764	29	28.3868
41.3382	0	331	325.929	322	338.116	40	30.1141	35	28.2348
41.3916	0	306	324.533	315	336.679	44	29.9527	24	28.0836
41.4449	0	338	323.143	315	335.249	41	29.7922	27	27.9332
41.4983	0	339	321.766	341	333.826	25	29.6327	28	27.7837
41.5517	1	311	320.44	307	332.445	31	29.474	24	27.635
41.6051	0	317	319.067	341	331.051	30	29.3162	28	27.4872
41.6585	0	344	317.701	304	329.645	22	29.1593	31	27.3402
41.7119	0	309	316.34	335	328.245	35	29.0032	26	27.1939
41.7653	0	349	314.986	289	326.852	26	28.8481	30	27.0485
41.8186	0	307	313.638	330	325.464	36	28.6938	39	26.9039
41.872	0	311	312.295	314	324.082	20	28.5404	25	26.7601
41.9254	0	318	310.959	340	322.707	20	28.3878	32	26.617
41.9788	0	326	309.628	301	321.337	26	28.2361	22	26.4748
42.0322	0	307	308.304	315	319.973	29	28.0852	27	26.3334
42.0856	0	305	306.985	322	318.616	32	27.9352	32	26.1927
42.139	0	300	305.672	299	317.264	22	27.7861	26	26.0528
42.1923	0	317	304.364	290	315.918	31	27.6377	25	25.9137
42.2457	0	284	303.069	315	314.578	34	27.4902	24	25.7754
42.2991	1	284	301.824	338	313.28	28	27.3436	21	25.6378
42.3525	0	274	300.539	317	311.969	27	27.1977	27	25.501
42.4059	1	286	299.304	326	310.682	29	27.0527	35	25.365
42.4593	0	270	298.022	322	309.382	29	26.9085	20	25.2297
42.5127	0	268	296.746	308	308.069	27	26.7651	27	25.0951
42.5661	0	297	295.476	319	306.762	25	26.6225	28	24.9613
42.6194	0	309	294.212	303	305.46	24	26.4807	23	24.8282
42.6728	0	263	292.953	303	304.164	44	26.3397	36	24.6959
42.7262	0	277	291.699	314	302.874	35	26.1995	21	24.5643
42.7796	0	298	290.452	285	301.589	27	26.06	20	24.4334
42.833	0	275	289.209	273	300.31	29	25.9214	28	24.3033
42.8864	0	294	287.973	295	299.037	30	25.7835	27	24.1739
42.9398	0	259	286.741	306	297.769	31	25.6464	28	24.0451
42.9931	0	297	285.515	275	296.506	17	25.5101	22	23.9171
43.0465	0	297	284.295	317	295.249	26	25.3745	27	23.7898
43.0999	0	284	283.08	254	293.998	11	25.2397	15	23.6633
43.1533	0	259	281.87	316	292.752	27	25.1057	31	23.5374
43.2067	0	302	280.665	280	291.511	33	24.9724	18	23.4122
43.2601	0	299	279.472	302	290.275	23	24.8398	38	23.2877
43.3135	1	274	278.329	281	289.082	30	24.7081	17	23.1639
43.3669	0	263	277.139	259	287.875	31	24.577	23	23.0407
43.4202	0	291	275.96	272	286.655	22	24.4467	22	22.9183
43.4736	1	291	274.831	243	285.476	31	24.3171	25	22.7965
43.527	0	289	273.655	267	284.284	17	24.1882	17	22.6754
43.5804	0	274	272.485	289	283.079	19	24.0601	28	22.555
43.6338	0	298	271.319	263	281.879	28	23.9326	12	22.4352
43.6872	0	285	270.159	282	280.684	31	23.8059	31	22.3162
43.7406	0	288	269.004	272	279.494	30	23.6799	24	22.1977
43.794	0	243	267.854	289	278.31	28	23.5546	26	22.0799
43.8473	0	250	266.709	292	277.13	26	23.43	18	21.9628
43.9007	0	284	265.569	251	275.956	20	23.3061	18	21.8463
43.9541	0	264	264.434	252	274.787	29	23.1829	26	21.7305
44.0075	0	230	263.304	286	273.623	24	23.0604	28	21.6153
44.0609	0	271	262.185	279	272.464	21	22.9386	21	21.5007
44.1143	1	258	261.117	265	271.346	28	22.8175	23	21.3868
44.1677	0	250	260	289	270.215	24	22.697	18	21.2735
44.221	0	255	258.889	270	269.07	17	22.5772	24	21.1608
44.2744	0	276	257.782	268	267.93	25	22.4581	22	21.0488
44.3278	0	231	256.68	259	266.795	21	22.3396	23	20.9373
44.3812	0	280	255.583	253	265.665	25	22.2219	26	20.8265
44.4346	0	267	254.491	241	264.54	29	22.1047	17	20.7163
44.488	0	268	253.411	269	263.419	20	21.9883	16	20.6068
44.5414	1	263	252.379	256	262.34	23	21.8725	32	20.4978
44.5947	0	234	251.3	254	261.248	22	21.7573	20	20.3894
44.6481	0	226	250.226	290	260.141	33	21.6428	26	20.2816
44.7015	0	264	249.157	248	259.039	26	21.5289	27	20.1744
44.7549	0	291	248.098	250	257.942	22	21.4157	13	20.0678
44.8083	1	241	247.089	237	256.886	17	21.3031	27	19.9618
44.8617	0	257	246.033	257	255.816	26	21.1911	22	19.8564
44.9151	0	269	244.981	234	254.732	17	21.0798	19	19.7516
44.9685	0	234	243.94	252	253.653	24	20.9691	22	19.6473
45.0219	1	228	242.948	256	252.615	15	20.859	26	19.5436
45.0752	0	234	241.909	236	251.564	28	20.7495	17	19.4405
45.1286	0	236	240.88	276	250.498	21	20.6407	19	19.338
45.182	1	239	239.902	235	249.473	22	20.5324	13	19.236
45.2354	0	223	238.875	264	248.434	17	20.4248	22	19.1346
45.2888	0	252	237.853	240	247.381	22	20.3177	24	19.0338
45.3422	0	243	236.836	257	246.333	16	20.2113	23	18.9335
45.3956	0	282	235.823	233	245.289	16	20.1054	26	18.8338
45.4489	0	237	234.815	247	244.25	25	20.0002	23	18.7346
45.5023	0	243	233.811	233	243.216	20	19.8955	17	18.636
45.5557	0	236	232.818	218	242.186	24	19.7915	18	18.5379
45.6091	1	234	231.875	241	241.197	12	19.688	16	18.4403
45.6625	0	214	230.889	240	240.194	22	19.585	18	18.3434
45.7159	1	231	229.953	229	239.213	27	19.4827	16	18.2469
45.7693	0	210	228.969	244	238.218	21	19.381	24	18.151
45.8227	0	229	227.989	250	237.208	22	19.2798	18	18.0556
45.876	0	229	227.014	232	236.203	21	19.1792	16	17.9607
45.9294	0	209	226.043	222	235.203	24	19.0791	23	17.8663
45.9828	0	222	225.077	210	234.207	22	18.9796	27	17.7725
46.0362	0	189	224.121	245	233.215	29	18.8807	20	17.6792
46.0896	1	218	223.215	235	232.264	15	18.7823	18	17.5864
46.143	0	232	222.26	231	231.299	25	18.6845	20	17.4941
46.1964	0	202	221.31	228	230.319	15	18.5872	15	17.4023
46.2497	0	206	220.364	244	229.343	28	18.4904	21	17.3111
46.3031	0	237	219.422	239	228.372	13	18.3942	19	17.2203
46.3565	0	223	218.49	256	227.405	22	18.2986	21	17.1301
46.4099	1	217	217.614	230	226.479	24	18.2035	16	17.0403
46.4633	1	232	216.735	207	225.575	18	18.1089	18	16.951
46.5167	0	233	215.82	223	224.638	16	18.0148	13	16.8623
46.5701	2	198	214.999	211	223.759	21	17.9213	19	16.774
46.6234	0	202	214.077	232	222.847	26	17.8283	21	16.6862
46.6768	0	193	213.159	252	221.902	16	17.7358	12	16.5989
46.7302	0	216	212.246	211	220.961	13	17.6439	16	16.5121
46.7836	0	224	211.337	206	220.024	19	17.5524	19	16.4258
46.837	0	234	210.432	213	219.091	19	17.4615	18	16.3399
46.8904	0	203	209.531	173	218.163	15	17.3711	20	16.2545
46.9438	0	226	208.635	216	217.239	13	17.2812	12	16.1696
46.9972	0	181	207.749	216	216.318	17	17.1917	25	16.0851
47.0505	1	225	206.912	218	215.439	21	17.1028	22	16.0012
47.1039	0	200	206.026	230	214.545	18	17.0144	19	15.9177
47.1573	0	226	205.145	221	213.636	17	16.9265	21	15.8346
47.2107	0	204	204.267	200	212.731	15	16.8391	15	15.752
47.2641	0	219	203.394	229	211.83	27	16.7521	18	15.6699
47.3175	0	197	202.531	206	210.933	22	16.6657	23	15.5882
47.3709	1	179	201.717	192	210.076	17	16.5797	21	15.5069
47.4243	0	193	200.854	211	209.205	17	16.4943	12	15.4262
47.4776	0	195	199.995	193	208.319	14	16.4093	18	15.3458
47.531	0	143	199.139	218	207.437	24	16.3247	24	15.2659
47.5844	0	182	198.288	205	206.559	13	16.2407	12	15.1865
47.6378	0	196	197.441	211	205.684	20	16.1571	15	15.1075
47.6912	0	191	196.597	237	204.814	13	16.074	11	15.0289
47.7446	0	203	195.758	216	203.947	19	15.9913	15	14.9508
47.798	0	181	194.922	228	203.084	15	15.9092	17	14.8731
47.8513	0	186	194.089	211	202.225	15	15.8274	24	14.7958
47.9047	0	194	193.267	191	201.37	21	15.7462	19	14.7189
47.9581	1	199	192.493	179	200.555	12	15.6654	19	14.6425
48.0115	0	200	191.671	222	199.725	18	15.585	13	14.5665
48.0649	0	189	190.852	184	198.879	18	15.5051	8	14.4909
48.1183	0	173	190.036	185	198.038	22	15.4257	18	14.4158
48.1717	0	175	189.225	183	197.2	17	15.3467	14	14.341
48.2251	0	174	188.417	214	196.366	17	15.2681	15	14.2667
48.2784	0	204	187.612	212	195.535	16	15.19	16	14.1928
48.3318	0	179	186.811	187	194.709	25	15.1123	23	14.1192
48.3852	0	195	186.014	206	193.885	19	15.035	17	14.0461
48.4386	0	168	185.22	187	193.066	12	14.9582	16	13.9734
48.492	0	193	184.43	183	192.249	25	14.8818	16	13.9011
48.5454	0	182	183.643	219	191.437	17	14.8059	15	13.8292
48.5988	0	173	182.86	196	190.628	26	14.7303	9	13.7577
48.6521	0	213	182.08	177	189.822	19	14.6552	22	13.6866
48.7055	0	155	181.303	201	189.02	21	14.5805	12	13.6159
48.7589	0	167	180.53	194	188.221	13	14.5063	13	13.5456
48.8123	0	180	179.76	186	187.426	15	14.4324	13	13.4756
48.8657	0	186	178.994	195	186.634	20	14.359	20	13.4061
48.9191	0	204	178.23	186	185.846	13	14.2859	19	13.3369
48.9725	0	162	177.47	155	185.061	19	14.2133	10	13.2681
49.0258	0	186	176.72	151	184.279	21	14.1411	21	13.1997
49.0792	1	177	176.018	185	183.537	19	14.0693	16	13.1317
49.1326	0	169	175.267	193	182.78	16	13.9979	18	13.064
49.186	0	133	174.518	178	182.008	18	13.9269	12	12.9968
49.2394	0	176	173.774	177	181.239	22	13.8563	15	12.9299
49.2928	0	176	173.032	204	180.473	19	13.7861	15	12.8633
49.3462	0	172	172.294	187	179.71	19	13.7163	21	12.7972
49.3996	0	155	171.559	150	178.951	19	13.6469	19	12.7314
49.4529	0	178	170.833	203	178.195	19	13.5778	14	12.6659
49.5063	1	179	170.162	187	177.479	18	13.5092	18	12.6009
49.5597	1	156	169.487	159	176.783	15	13.4409	11	12.5361
49.6131	0	150	168.762	191	176.054	18	13.373	17	12.4718
49.6665	0	161	168.046	167	175.309	21	13.3055	15	12.4078
49.7199	1	170	167.379	182	174.604	12	13.2384	15	12.3442
49.7733	0	178	166.663	183	173.884	10	13.1717	19	12.2808
49.8267	0	171	165.95	161	173.148	13	13.1053	12	12.2179
49.88	0	150	165.246	153	172.415	17	13.0393	19	12.1553
49.9334	1	184	164.591	175	171.722	21	12.9737	10	12.0931
49.9868	0	162	163.887	154	171.014	10	12.9084	18	12.0312
50.0402	0	157	163.185	193	170.29	11	12.8435	19	11.9696
50.0936	0	149	162.487	183	169.569	21	12.779	16	11.9084
50.147	0	170	161.792	172	168.851	11	12.7148	15	11.8475
50.2004	0	142	161.101	188	168.137	17	12.651	15	11.7869
50.2537	0	163	160.412	174	167.426	16	12.5876	6	11.7267
50.3071	0	166	159.733	165	166.718	14	12.5244	15	11.6668
50.3605	1	167	159.102	149	166.049	11	12.4617	18	11.6073
50.4139	0	163	158.428	184	165.365	13	12.3993	18	11.5481
50.4673	1	155	157.802	159	164.702	20	12.3373	11	11.4892
50.5207	0	166	157.126	157	164.023	18	12.2756	21	11.4306
50.5741	0	182	156.453	157	163.329	13	12.2142	13	11.3724
50.6275	0	160	155.784	167	162.637	16	12.1532	20	11.3144
50.6808	0	157	155.13	151	161.949	13	12.0926	15	11.2568
50.7342	2	145	154.57	142	161.337	12	12.0323	10	11.1996
50.7876	0	165	153.907	158	160.69	15	11.9723	10	11.1426
50.841	0	175	153.247	180	160.009	17	11.9126	10	11.0859
50.8944	0	169	152.59	164	159.331	12	11.8533	11	11.0296
50.9478	0	152	151.937	157	158.656	24	11.7943	11	10.9736
51.0012	0	153	151.286	180	157.984	15	11.7357	14	10.9179
51.0545	0	159	150.639	172	157.316	8	11.6774	13	10.8625
51.1079	0	169	150.001	136	156.65	15	11.6194	15	10.8073
51.1613	1	145	149.411	155	156.023	9	11.5617	14	10.7525
51.2147	0	168	148.771	152	155.381	11	11.5044	12	10.6981
51.2681	0	158	148.134	159	154.723	20	11.4474	10	10.6439
51.3215	0	158	147.501	125	154.068	14	11.3907	13	10.59
51.3749	0	150	146.876	163	153.416	13	11.3343	10	10.5364
51.4282	1	134	146.312	159	152.804	12	11.2782	14	10.4831
51.4816	2	142	145.788	151	152.248	20	11.2224	13	10.4301
51.535	0	133	145.162	138	151.64	15	11.167	18	10.3774
51.5884	0	162	144.538	143	150.996	11	11.1119	17	10.3249
51.6418	0	139	143.918	153	150.356	11	11.0571	12	10.2728
51.6952	0	130	143.301	152	149.718	17	11.0025	7	10.221
51.7486	0	162	142.687	152	149.084	9	10.9483	10	10.1694
51.802	0	121	142.076	146	148.452	14	10.8944	12	10.1181
51.8554	0	147	141.467	145	147.824	12	10.8408	10	10.0671
51.9087	0	142	140.862	166	147.198	10	10.7875	16	10.0164
51.9621	0	148	140.259	173	146.574	9	10.7345	11	9.96602
52.0155	0	155	139.66	143	145.954	8	10.6818	9	9.91587
52.0689	0	131	139.062	142	145.337	10	10.6294	14	9.866
52.1223	0	140	138.468	146	144.722	14	10.5773	11	9.81641
52.1757	0	152	137.883	145	144.11	11	10.5254	12	9.76709
52.2291	1	139	137.351	148	143.537	7	10.4739	9	9.71804
52.2824	1	139	136.815	166	142.984	10	10.4227	7	9.66927
52.3358	0	147	136.228	135	142.397	15	10.3717	12	9.62076
52.3892	0	133	135.645	153	141.794	13	10.321	11	9.57252
52.4426	0	132	135.064	130	141.193	3	10.2707	12	9.52455
52.496	0	129	134.486	137	140.595	12	10.2205	12	9.47684
52.5494	0	161	133.917	116	140	8	10.1707	10	9.4294
52.6028	1	140	133.395	146	139.444	12	10.1212	16	9.38222
52.6561	0	132	132.824	143	138.872	10	10.0719	11	9.3353
52.7095	0	128	132.255	139	138.284	10	10.0229	9	9.28864
52.7629	0	123	131.689	147	137.699	11	9.97421	8	9.24224
52.8163	0	131	131.125	138	137.116	8	9.92576	12	9.1961
52.8697	0	142	130.564	124	136.535	10	9.87759	9	9.15021
52.9231	0	129	130.012	120	135.958	9	9.82969	8	9.10457
52.9765	1	122	129.508	144	135.419	10	9.78206	11	9.05919
53.0299	0	128	128.953	137	134.864	11	9.73469	10	9.01405
53.0832	0	122	128.401	130	134.293	8	9.68759	13	8.96917
53.1366	0	112	127.852	142	133.725	13	9.64075	3	8.92454
53.19	0	133	127.305	117	133.159	17	9.59418	11	8.88015
53.2434	0	155	126.766	111	132.595	12	9.54787	6	8.836
53.2968	1	113	126.276	135	132.071	12	9.50181	16	8.7921
53.3502	0	124	125.735	147	131.53	8	9.45602	12	8.74845
53.4036	0	100	125.197	147	130.973	9	9.41048	11	8.70503
53.4569	0	125	124.667	127	130.419	11	9.3652	5	8.66186
53.5103	1	128	124.185	116	129.903	8	9.32017	15	8.61892
53.5637	0	119	123.653	128	129.372	6	9.27539	8	8.57622
53.6171	0	113	123.123	132	128.824	13	9.23087	9	8.53376
53.6705	0	113	122.596	137	128.278	14	9.18659	8	8.49153
53.7239	0	98	122.071	102	127.735	13	9.14256	10	8.44954
53.7773	0	132	121.549	116	127.195	14	9.09878	10	8.40777
53.8307	0	101	121.029	135	126.656	9	9.05525	12	8.36624
53.884	0	126	120.511	124	126.121	15	9.01196	11	8.32494
53.9374	0	107	119.996	131	125.587	11	8.96891	7	8.28387
53.9908	0	139	119.483	151	125.056	10	8.9261	9	8.24302
54.0442	0	119	118.973	124	124.527	8	8.88353	6	8.2024
54.0976	0	109	118.465	137	124.001	12	8.8412	10	8.162
54.151	0	123	117.959	130	123.477	9	8.79911	13	8.12183
54.2044	0	113	117.455	119	122.955	11	8.75726	7	8.08188
54.2578	0	108	116.953	105	122.435	10	8.71564	6	8.04215
54.3111	0	135	116.46	134	121.918	9	8.67425	12	8.00264
54.3645	1	120	116.015	125	121.439	14	8.63309	9	7.96335
54.4179	0	113	115.518	117	120.944	11	8.59217	10	7.92427
54.4713	0	115	115.024	129	120.432	12	8.55148	7	7.88541
54.5247	0	93	114.532	127	119.923	10	8.51101	11	7.84677
54.5781	0	124	114.043	128	119.416	11	8.47077	4	7.80834
54.6315	0	108	113.556	115	118.911	5	8.43075	8	7.77012
54.6848	0	108	113.07	115	118.409	13	8.39096	7	7.73211
54.7382	0	118	112.587	120	117.908	8	8.3514	12	7.69432
54.7916	0	103	112.119	129	117.41	17	8.31205	10	7.65673
54.845	2	123	111.743	131	116.986	9	8.27293	16	7.61935
54.8984	0	116	111.263	120	116.528	9	8.23402	11	7.58218
54.9518	0	108	110.786	124	116.035	11	8.19534	9	7.54521
55.0052	0	98	110.312	135	115.543	18	8.15687	11	7.50845
55.0585	0	88	109.839	124	115.054	12	8.11861	15	7.47189
55.1119	0	114	109.369	107	114.567	13	8.08057	10	7.43553
55.1653	0	127	108.9	113	114.082	9	8.04274	8	7.39937
55.2187	0	101	108.434	111	113.599	9	8.00513	9	7.36342
55.2721	0	99	107.971	113	113.119	6	7.96773	7	7.32766
55.3255	0	98	107.509	107	112.64	11	7.93053	5	7.2921
55.3789	0	118	107.049	121	112.164	15	7.89355	9	7.25673
55.4323	0	107	106.592	117	111.69	18	7.85677	8	7.22157
55.4856	0	113	106.136	118	111.217	11	7.8202	5	7.18659
55.539	0	111	105.683	107	110.747	7	7.78383	9	7.15181
55.5924	0	106	105.231	105	110.279	11	7.74767	11	7.11722
55.6458	0	116	104.782	117	109.813	6	7.71171	7	7.08283
55.6992	0	99	104.334	86	109.349	7	7.67595	6	7.04862
55.7526	0	121	103.895	114	108.887	10	7.64039	12	7.0146
55.806	1	120	103.503	98	108.463	15	7.60503	10	6.98077
55.8593	0	97	103.06	121	108.023	8	7.56987	6	6.94713
55.9127	0	100	102.619	100	107.566	7	7.53491	7	6.91367
55.9661	0	112	102.18	119	107.111	15	7.50014	6	6.8804
56.0195	0	110	101.743	100	106.658	14	7.46557	9	6.84731
56.0729	0	108	101.308	98	106.207	5	7.43119	9	6.81441
56.1263	0	114	100.875	96	105.758	11	7.397	10	6.78169
56.1797	0	96	100.444	117	105.311	5	7.36301	6	6.74914
56.2331	0	95	100.015	108	104.866	6	7.3292	5	6.71678
56.2864	0	103	99.5875	105	104.423	10	7.29559	11	6.6846
56.3398	0	117	99.1621	109	103.982	13	7.26216	14	6.65259
56.3932	0	81	98.7386	104	103.542	6	7.22892	6	6.62076
56.4466	0	118	98.317	102	103.105	10	7.19587	9	6.58911
56.5	0	118	97.8972	113	102.669	11	7.163	2	6.55763
56.5534	0	108	97.4793	95	102.236	5	7.13032	6	6.52633
56.6068	0	102	97.0632	97	101.804	7	7.09782	11	6.4952
56.6602	0	90	96.6489	105	101.374	7	7.06551	10	6.46424
56.7135	0	97	96.2364	109	100.946	11	7.03337	8	6.43346
56.7669	0	97	95.8256	102	100.519	8	7.00141	14	6.40284
56.8203	0	97	95.4167	104	100.095	9	6.96964	8	6.37239
56.8737	0	98	95.0157	102	99.6722	10	6.93804	7	6.34211
56.9271	1	79	94.6617	102	99.2878	15	6.90662	9	6.312
56.9805	0	93	94.2566	99	98.8867	8	6.87537	10	6.28205
57.0339	0	96	93.8533	97	98.4685	10	6.8443	9	6.25227
57.0872	0	94	93.4519	106	98.0521	12	6.81341	7	6.22266
57.1406	0	117	93.0523	118	97.6376	9	6.78268	5	6.19321
57.194	0	86	92.6545	108	97.2248	5	6.75213	9	6.16392
57.2474	0	78	92.2585	83	96.8139	12	6.72176	11	6.13479
57.3008	0	79	91.8642	98	96.4047	9	6.69155	10	6.10583
57.3542	0	100	91.4717	90	95.9973	8	6.66151	10	6.07702
57.4076	0	90	91.0872	84	95.5917	5	6.63164	5	6.04837
57.4609	1	78	90.7495	103	95.2242	5	6.60193	12	6.01989
57.5143	0	105	90.3607	90	94.84	6	6.5724	9	5.99156
57.5677	0	95	89.9737	109	94.4386	4	6.54302	10	5.96338
57.6211	0	90	89.5885	94	94.0391	15	6.51382	9	5.93536
57.6745	0	91	89.2051	88	93.6413	7	6.48478	13	5.9075
57.7279	0	84	88.8297	105	93.2452	11	6.4559	9	5.87979
57.7813	1	71	88.5011	86	92.8873	6	6.42718	9	5.85223
57.8347	0	81	88.1214	92	92.5126	9	6.39862	6	5.82483
57.888	0	97	87.756	107	92.1207	13	6.37022	2	5.79758
57.9414	2	91	87.4826	88	91.8035	5	6.34198	8	5.77048
57.9948	0	92	87.1055	86	91.451	13	6.31391	5	5.74353
58.0482	0	90	86.7303	90	91.0625	8	6.28598	8	5.71672
58.1016	0	92	86.357	88	90.6758	6	6.25822	6	5.69007
58.155	0	96	85.9918	98	90.291	13	6.23061	2	5.66356
58.2084	1	89	85.6736	95	89.9443	8	6.20315	10	5.6372
58.2617	0	91	85.3044	87	89.5808	9	6.17585	5	5.61099
58.3151	0	89	84.9372	79	89.2003	5	6.1487	7	5.58492
58.3685	0	76	84.5717	103	88.8215	3	6.12171	9	5.55899
58.4219	0	85	84.2144	94	88.4445	8	6.09486	5	5.53321
58.4753	1	73	83.9039	84	88.1056	6	6.06817	7	5.50757
58.5287	0	93	83.5425	78	87.7499	8	6.04162	7	5.48207
58.5821	0	85	83.1828	92	87.3771	8	6.01523	3	5.45671
58.6355	0	97	82.825	83	87.006	7	5.98898	5	5.43149
58.6889	0	81	82.4752	87	86.6367	5	5.96288	7	5.40642
58.7422	1	105	82.1722	101	86.3054	14	5.93693	9	5.38148
58.7956	0	76	81.8182	104	85.9573	7	5.91112	9	5.35668
58.849	0	93	81.466	95	85.5921	8	5.88545	8	5.33201
58.9024	0	92	81.1155	87	85.2285	7	5.85993	1	5.30748
58.9558	0	80	80.7668	76	84.8666	5	5.83456	13	5.28309
59.0092	0	88	80.4198	104	84.5064	4	5.80932	7	5.25883
59.0626	0	66	80.0807	94	84.1478	11	5.78423	3	5.23471
59.1159	1	87	79.7883	90	83.8273	0	5.75928	4	5.21072
59.1693	0	82	79.4449	94	83.4899	4	5.73446	4	5.18686
59.2227	0	73	79.1031	109	83.1352	10	5.70979	7	5.16314
59.2761	0	69	78.763	94	82.7822	5	5.68525	7	5.13954
59.3295	0	77	78.4246	101	82.4308	4	5.66086	8	5.11608
59.3829	0	85	78.0878	96	82.081	11	5.6366	7	5.09275
59.4363	0	81	77.7588	89	81.7328	8	5.61247	9	5.06954
59.4896	1	88	77.4827	103	81.4226	9	5.58848	6	5.04646
59.543	1	72	77.2006	86	81.1319	6	5.56463	4	5.02352
59.5964	0	68	76.8673	92	80.8053	6	5.5409	1	5.00069
59.6498	0	85	76.5358	91	80.4615	7	5.51732	9	4.978
59.7032	0	68	76.206	79	80.1193	8	5.49386	5	4.95543
59.7566	0	81	75.8778	93	79.7788	4	5.47053	5	4.93298
59.81	0	80	75.5513	71	79.4398	8	5.44734	2	4.91066
59.8634	0	76	75.2264	76	79.1023	6	5.42428	4	4.88846
59.9167	0	82	74.9031	80	78.7664	7	5.40134	7	4.86638
59.9701	0	64	74.5813	71	78.4321	8	5.37854	5	4.84443
60.0235	0	72	74.2611	85	78.0992	9	5.35586	4	4.8226
60.0769	0	88	73.9485	89	77.7679	4	5.33331	8	4.80089
60.1303	1	101	73.6826	88	77.4744	12	5.31088	5	4.7793
60.1837	0	75	73.3654	75	77.164	11	5.28858	6	4.75782
60.2371	0	64	73.0498	76	76.8362	8	5.26641	3	4.73647
60.2904	0	79	72.7357	81	76.5098	7	5.24436	3	4.71523
60.3438	0	55	72.4231	75	76.185	10	5.22243	6	4.69412
60.3972	0	66	72.112	88	75.8616	8	5.20063	8	4.67311
60.4506	0	69	71.8024	75	75.5397	5	5.17895	8	4.65223
60.504	0	91	71.4942	73	75.2193	6	5.15739	5	4.63146
60.5574	0	80	71.1874	80	74.9002	6	5.13595	5	4.61081
60.6108	0	77	70.8821	80	74.5826	7	5.11463	10	4.59026
60.6642	0	70	70.5782	70	74.2664	5	5.09344	6	4.56984
60.7175	0	68	70.2756	71	73.9516	7	5.07236	10	4.54952
60.7709	0	64	69.9806	71	73.6382	9	5.05139	5	4.52932
60.8243	1	71	69.7321	71	73.3626	12	5.03055	7	4.50923
60.8777	0	69	69.4322	76	73.0699	11	5.00982	6	4.48925
60.9311	0	83	69.1338	62	72.7597	7	4.98921	5	4.46938
60.9845	0	70	68.8367	81	72.4509	8	4.96872	4	4.44962
61.0379	0	72	68.541	70	72.1434	9	4.94834	2	4.42997
61.0913	0	62	68.2468	82	71.8374	3	4.92807	6	4.41043
61.1446	0	85	67.9539	66	71.5327	7	4.90792	5	4.391
61.198	0	76	67.6623	92	71.2293	3	4.88788	5	4.37167
61.2514	0	74	67.3783	75	70.9274	9	4.86795	7	4.35246
61.3048	1	72	67.1407	77	70.6631	3	4.84813	6	4.33334
61.3582	0	71	66.8517	83	70.3817	5	4.82843	4	4.31434
61.4116	0	87	66.5641	92	70.0827	6	4.80884	7	4.29543
61.465	0	93	66.2779	71	69.7851	6	4.78935	1	4.27664
61.5183	0	74	65.993	76	69.4889	3	4.76998	4	4.25794
61.5717	0	76	65.7095	81	69.194	6	4.75071	5	4.23935
61.6251	0	73	65.4273	67	68.9004	3	4.73155	4	4.22087
61.6785	0	61	65.1464	60	68.6081	7	4.7125	5	4.20248
61.7319	0	69	64.8668	74	68.317	6	4.69356	4	4.1842
61.7853	0	62	64.5884	64	68.0273	6	4.67472	2	4.16602
61.8387	0	63	64.3114	69	67.7389	5	4.65599	3	4.14793
61.892	0	66	64.0356	53	67.4517	9	4.63736	2	4.12995
61.9454	0	64	63.761	67	67.1658	7	4.61884	5	4.11207
61.9988	0	78	63.4877	67	66.8811	9	4.60042	6	4.09429
62.0522	0	79	63.2155	63	66.5977	7	4.5821	5	4.0766
62.1056	0	59	62.9446	68	66.3155	6	4.56389	3	4.05901
62.159	0	67	62.6749	53	66.0346	11	4.54578	7	4.04152
62.2124	0	60	62.4064	65	65.7548	5	4.52777	3	4.02413
62.2658	0	65	62.1452	71	65.4763	6	4.50986	2	4.00683
62.3191	1	55	61.9304	58	65.2353	8	4.49205	4	3.98963
62.3725	0	64	61.6639	49	64.9771	4	4.47434	10	3.97252
62.4259	0	70	61.3987	59	64.7013	2	4.45673	10	3.95551
62.4793	0	66	61.1348	55	64.4266	3	4.43922	2	3.93859
62.5327	0	64	60.8721	60	64.1532	6	4.42181	2	3.92177
62.5861	0	75	60.6168	60	63.881	7	4.4045	4	3.90504
62.6395	1	60	60.4079	67	63.6464	8	4.38728	7	3.8884
62.6928	0	65	60.1474	62	63.3945	5	4.37016	5	3.87185
62.7462	0	65	59.8882	62	63.1249	4	4.35313	3	3.85539
62.7996	0	56	59.6302	57	62.8566	4	4.3362	3	3.83903
62.853	0	56	59.3735	69	62.5895	3	4.31937	3	3.82276
62.9064	0	62	59.118	60	62.3236	5	4.30263	7	3.80657
62.9598	0	55	58.8637	64	62.0589	5	4.28598	2	3.79048
63.0132	0	59	58.6106	59	61.7953	6	4.26943	6	3.77447
63.0666	0	57	58.3587	78	61.533	3	4.25297	7	3.75855
63.12	0	70	58.108	62	61.2718	12	4.2366	4	3.74272
63.1733	0	59	57.8584	47	61.0117	6	4.22033	2	3.72698
63.2267	0	62	57.6099	56	60.7528	5	4.20414	3	3.71133
63.2801	0	48	57.3626	62	60.495	7	4.18805	5	3.69576
63.3335	0	57	57.1226	67	60.2384	3	4.17204	5	3.68028
63.3869	1	60	56.9288	57	60.0193	3	4.15613	6	3.66488
63.4403	0	56	56.6833	52	59.7828	3	4.1403	10	3.64957
63.4937	0	61	56.4391	60	59.5286	6	4.12457	7	3.63434
63.547	0	54	56.196	57	59.2756	9	4.10892	2	3.6192
63.6004	0	49	55.9541	69	59.0236	4	4.09336	6	3.60414
63.6538	0	56	55.7133	58	58.7728	4	4.07789	5	3.58917
63.7072	0	64	55.4736	59	58.5232	6	4.0625	2	3.57427
63.7606	0	64	55.2351	51	58.2746	3	4.0472	7	3.55946
63.814	0	66	54.9977	61	58.0271	6	4.03199	7	3.54473
63.8674	0	56	54.7675	61	57.7807	4	4.01686	5	3.53009
63.9207	1	54	54.5836	70	57.5718	5	4.00181	4	3.51552
63.9741	0	63	54.3479	55	57.3456	5	3.98685	6	3.50103
64.0275	0	51	54.1134	69	57.1015	5	3.97198	5	3.48663
64.0809	0	56	53.8863	61	56.8585	7	3.95718	3	3.4723
64.1343	1	53	53.7055	56	56.6531	8	3.94247	2	3.45806
64.1877	0	53	53.4729	55	56.4302	6	3.92785	3	3.44389
64.2411	0	47	53.2416	55	56.1896	4	3.9133	4	3.4298
64.2944	0	65	53.0115	50	55.9501	2	3.89884	4	3.41579
64.3478	0	57	52.7825	60	55.7117	6	3.88446	6	3.40185
64.4012	0	49	52.5547	56	55.4745	2	3.87015	4	3.38799
64.4546	0	79	52.3279	67	55.2383	10	3.85593	8	3.37421
64.508	0	55	52.1023	51	55.0031	3	3.84179	9	3.36051
64.5614	0	49	51.8777	63	54.7691	5	3.82773	2	3.34688
64.6148	0	58	51.6543	54	54.5361	6	3.81374	3	3.33333
64.6682	0	54	51.4318	49	54.3041	6	3.79984	4	3.31985
64.7215	0	47	51.2104	57	54.0732	4	3.78601	4	3.30644
64.7749	0	54	50.99	48	53.8433	1	3.77226	4	3.29311
64.8283	0	57	50.7707	58	53.6144	2	3.75859	3	3.27986
64.8817	0	46	50.5523	56	53.3866	3	3.74499	5	3.26667
64.9351	0	65	50.3349	62	53.1597	4	3.73147	1	3.25356
64.9885	0	37	50.1185	49	52.9339	7	3.71803	5	3.24053
65.0419	0	51	49.9031	65	52.709	9	3.70466	5	3.22756
65.0952	0	53	49.6887	55	52.4851	3	3.69137	6	3.21467
65.1486	0	56	49.4751	60	52.2622	6	3.67815	2	3.20185
65.202	0	56	49.2626	58	52.0403	6	3.665	5	3.18909
65.2554	0	48	49.0509	59	51.8193	6	3.65193	3	3.17641
65.3088	0	46	48.8402	53	51.5993	4	3.63893	3	3.1638
65.3622	0	47	48.6429	51	51.3802	2	3.62601	6	3.15126
65.4156	2	50	48.5367	58	51.2349	5	3.61315	4	3.13879
65.469	0	49	48.3321	54	51.0536	5	3.60037	6	3.12638
65.5224	1	42	48.1738	68	50.8719	4	3.58766	5	3.11405
65.5757	0	41	47.9638	52	50.6728	6	3.57502	7	3.10178
65.6291	0	47	47.755	55	50.4558	5	3.56246	3	3.08959
65.6825	0	52	47.5473	56	50.2399	2	3.54996	3	3.07745
65.7359	0	47	47.3408	47	50.025	6	3.53753	10	3.06539
65.7893	0	57	47.1416	46	49.8111	4	3.52518	6	3.05339
65.8427	1	50	46.9886	33	49.6347	8	3.51289	8	3.04146
65.8961	0	56	46.7839	41	49.4408	6	3.50067	4	3.0296
65.9494	0	49	46.5803	60	49.229	3	3.48852	7	3.0178
66.0028	0	34	46.3779	56	49.0183	3	3.47644	3	3.00606
66.0562	0	52	46.1765	47	48.8086	3	3.46442	2	2.99439
66.1096	0	46	45.9824	52	48.5998	6	3.45248	3	2.98279
66.163	1	53	45.8344	49	48.4285	6	3.4406	9	2.97125
66.2164	0	52	45.6347	45	48.2397	5	3.42878	5	2.95977
66.2698	0	48	45.4361	50	48.033	6	3.41704	4	2.94836
66.3231	0	49	45.2386	41	47.8273	6	3.40535	2	2.93701
66.3765	0	39	45.0422	59	47.6225	3	3.39374	3	2.92572
66.4299	0	41	44.8468	50	47.4188	2	3.38219	4	2.91449
66.4833	0	48	44.6523	42	47.216	5	3.3707	1	2.90333
66.5367	0	43	44.4589	55	47.0142	5	3.35928	1	2.89223
66.5901	0	43	44.2664	62	46.8133	1	3.34792	3	2.88119
66.6435	0	48	44.0749	54	46.6134	1	3.33663	4	2.87021
66.6969	0	43	43.8843	44	46.4144	8	3.3254	3	2.85929
66.7502	0	45	43.6946	41	46.2163	8	3.31423	7	2.84843
66.8036	0	49	43.5121	41	46.0191	3	3.30312	1	2.83764
66.857	1	42	43.3755	50	45.8592	1	3.29208	2	2.8269
66.9104	0	37	43.1871	52	45.6817	2	3.2811	2	2.81622
66.9638	0	51	42.9997	48	45.4862	2	3.27018	5	2.8056
67.0172	0	50	42.8132	57	45.2916	4	3.25932	3	2.79504
67.0706	0	49	42.6276	46	45.098	2	3.24853	6	2.78454
67.1239	0	41	42.443	62	44.9053	4	3.23779	7	2.77409
67.1773	0	45	42.2593	47	44.7134	7	3.22711	2	2.7637
67.2307	0	52	42.0765	42	44.5225	3	3.2165	6	2.75337
67.2841	0	49	41.8945	41	44.3324	5	3.20594	1	2.7431
67.3375	0	48	41.7134	44	44.1431	6	3.19544	8	2.73289
67.3909	0	46	41.5394	36	43.9548	2	3.185	4	2.72273
67.4443	1	48	41.4113	36	43.8037	1	3.17462	8	0
67.4977	0	46	41.2313	48	43.6349	6	3.1643	8	0
67.551	0	38	41.0523	49	43.4481	4	3.15403	6	0
67.6044	0	42	40.8741	46	43.2622	5	3.14383	3	0
67.6578	0	35	40.6969	33	43.0772	4	3.13368	3	0
67.7112	0	46	40.5205	51	42.893	5	3.12359	9	0
67.7646	0	41	40.345	37	42.7097	4	3.11355	3	0
67.818	0	33	40.1703	39	42.5272	0	3.10357	1	0
67.8714	0	39	39.9965	40	42.3455	5	3.09365	2	0
67.9248	0	37	39.8235	41	42.1647	4	3.08378	3	0
67.9781	0	48	39.6576	46	41.9847	5	3.07396	5	0
68.0315	1	37	39.5375	38	41.8419	2	3.06421	2	0
68.0849	0	42	39.3717	39	41.6814	5	3.0545	2	0
68.1383	1	35	39.2519	33	41.5393	1	3.04485	1	0
68.1917	0	44	39.0803	40	41.3795	3	3.03526	3	0
68.2451	0	41	38.9096	46	41.2017	3	0	3	0
68.2985	0	40	38.7398	50	41.0248	4	0	6	0
68.3518	0	38	38.571	50	40.8487	6	0	2	0
68.4052	0	32	38.403	37	40.6735	4	0	6	0
68.4586	0	35	38.236	44	40.4991	6	0	1	0
68.512	0	41	38.0698	42	40.3255	6	0	2	0
68.5654	0	45	37.9106	34	40.1528	2	0	3	0
68.6188	1	33	37.8036	34	40.0172	2	0	5	0
68.6722	1	38	37.6898	30	39.9004	5	0	5	0
68.7255	0	42	37.5241	45	39.7471	5	0	6	0
68.7789	0	34	37.3595	45	39.5757	10	0	1	0
68.8323	0	43	37.1958	31	39.4052	1	0	4	0
68.8857	0	37	37.0392	52	39.2355	4	0	5	0
68.9391	1	50	36.9287	34	39.1031	6	0	4	0
68.9925	0	45	36.7663	36	38.953	5	0	2	0
69.0459	0	41	36.6111	36	38.785	7	0	3	0
69.0993	1	33	36.502	41	38.6541	2	0	5	0
69.1526	0	47	36.341	32	38.5057	2	0	3	0
69.206	0	36	36.181	37	38.3392	5	0	7	0
69.2594	0	39	36.022	34	38.1736	3	0	4	0
69.3128	0	37	35.8639	42	38.0088	1	0	2	0
69.3662	0	38	35.7068	45	37.8449	1	0	5	0
69.4196	0	37	35.5505	39	37.6818	2	0	2	0
69.473	0	36	35.3951	41	37.5194	2	0	4	0
69.5263	0	39	35.2405	36	37.358	4	0	2	0
69.5797	0	31	35.0868	42	37.1972	4	0	6	0
69.6331	0	37	34.9339	43	37.0373	2	0	1	0
69.6865	0	44	34.7817	36	36.8781	2	0	1	0
69.7399	0	43	34.6303	36	36.7197	4	0	6	0
69.7933	0	42	34.4859	31	36.562	1	0	4	0
69.8467	1	40	34.3873	32	36.4415	2	0	5	0
69.9001	0	45	34.2367	38	36.3033	2	0	5	0
69.9535	0	26	34.087	45	36.1469	2	0	5	0
70.0068	0	42	33.938	49	35.9912	3	0	2	0
70.0602	0	41	33.796	37	35.8364	5	0	5	0
70.1136	1	42	33.7	39	35.7186	1	0	4	0
70.167	0	31	33.5519	45	35.5832	5	0	2	0
70.2204	0	30	33.4047	29	35.4295	6	0	3	0
70.2738	0	39	33.2583	25	35.2767	4	0	1	0
70.3272	0	29	33.1127	47	35.1246	4	0	4	0
70.3805	0	39	32.9679	33	34.9733	2	0	1	0
70.4339	0	37	32.8239	40	34.8227	9	0	4	0
70.4873	0	32	32.6868	39	34.6728	5	0	4	0
70.5407	1	31	32.5956	38	34.5601	4	0	2	0
70.5941	0	38	32.4523	40	34.4295	5	0	2	0
70.6475	0	33	32.3099	40	34.2809	4	0	2	0
70.7009	0	32	32.1683	36	34.1329	2	0	5	0
70.7542	0	29	32.0274	47	33.9857	1	0	2	0
70.8076	0	30	31.8873	33	33.8392	2	0	5	0
70.861	0	30	31.7541	37	33.6934	5	0	6	0
70.9144	1	30	31.6668	29	33.5847	2	0	1	0
70.9678	0	31	31.5274	33	33.4582	4	0	6	0
71.0212	0	38	31.3888	37	33.3136	3	0	1	0
71.0746	0	20	31.251	41	33.1697	7	0	2	0
71.1279	0	29	31.1202	29	33.0265	1	0	1	0
71.1813	1	29	31.0353	31	32.9204	1	0	4	0
71.2347	0	33	30.9169	31	32.7965	5	0	5	0
71.2881	3	25	30.9348	38	32.7637	2	0	4	0
71.3415	0	34	30.7951	31	32.6761	2	0	2	0
71.3949	0	36	30.6628	40	32.5327	3	0	4	0
71.4483	1	40	30.5766	32	32.4266	1	0	3	0
71.5017	0	36	30.4387	23	32.3028	6	0	3	0
71.555	0	27	30.3019	28	32.161	2	0	0	0
71.6084	0	23	30.1723	34	32.02	7	0	1	0
71.6618	1	31	30.0888	28	31.9163	2	0	3	0
71.7152	0	24	29.9535	29	31.7949	3	0	7	0
71.7686	0	35	29.8192	28	31.6554	7	0	1	0
71.822	0	27	29.6859	36	31.5167	1	0	2	0
71.8754	0	35	29.5535	32	31.3788	3	0	1	0
71.9287	0	21	29.422	36	31.2417	4	0	3	0
71.9821	0	43	29.2913	33	31.1054	2	0	2	0
72.0355	0	34	29.1615	32	30.9698	2	0	4	0
72.0889	0	34	29.0325	36	30.8349	3	0	5	0
72.1423	0	32	28.9042	33	30.7008	3	0	4	0
72.1957	0	32	28.7829	39	30.5674	1	0	3	0
72.2491	1	25	28.7075	37	30.471	2	0	3	0
72.3025	0	33	28.5924	31	30.3569	3	0	2	0
72.3559	2	29	28.5684	30	30.2974	4	0	2	0
72.4092	0	33	28.4396	23	30.2017	6	0	1	0
72.4626	0	27	28.3118	39	30.0689	5	0	3	0
72.516	0	38	28.1849	22	29.9369	0	0	5	0
72.5694	0	29	28.0589	36	29.8057	1	0	5	0
72.6228	0	29	27.9337	32	29.6752	2	0	2	0
72.6762	0	21	27.8094	37	29.5454	3	0	5	0
72.7296	0	29	27.6859	32	29.4164	5	0	3	0
72.7829	0	24	27.5631	25	29.2881	5	0	2	0
72.8363	0	29	27.4411	38	29.1604	2	0	3	0
72.8897	0	31	27.3198	32	29.0334	1	0	0	0
72.9431	0	34	27.1992	42	28.9071	4	0	3	0
72.9965	0	32	27.0792	32	28.7815	5	0	2	0
73.0499	0	23	26.9599	33	28.6564	0	0	3	0
73.1033	0	24	26.8413	31	28.532	7	0	4	0
73.1566	0	30	26.7233	27	28.4082	3	0	0	0
73.21	0	31	26.6059	44	28.2851	5	0	1	0
73.2634	0	19	26.4953	33	28.1625	5	0	2	0
73.3168	1	22	26.4304	24	28.0769	4	0	0	0
73.3702	0	21	26.3133	30	27.9734	2	0	2	0
73.4236	0	27	26.197	27	27.8517	3	0	2	0
73.477	0	33	26.0812	26	27.7306	5	0	3	0
73.5304	0	20	25.9661	35	27.61	2	0	3	0
73.5837	0	24	25.8517	29	27.4901	3	0	6	0
73.6371	0	21	25.7378	41	27.3708	3	0	5	0
73.6905	0	27	25.6246	34	27.2521	7	0	4	0
73.7439	0	22	25.5119	30	27.1339	5	0	1	0
73.7973	0	27	25.3998	33	27.0163	4	0	3	0
73.8507	0	30	25.2883	30	26.8992	3	0	2	0
73.9041	0	26	25.1773	24	26.7828	4	0	2	0
73.9574	0	18	25.0731	33	26.6668	1	0	2	0
74.0108	1	21	25.0145	24	26.5878	2	0	2	0
74.0642	0	23	24.9037	32	26.4909	0	0	4	0
74.1176	0	31	24.7935	29	26.3757	5	0	5	0
74.171	0	31	24.6839	25	26.261	4	0	3	0
74.2244	0	22	24.575	33	26.1469	1	0	1	0
74.2778	0	24	24.4666	27	26.0333	4	0	2	0
74.3312	0	25	24.3588	28	25.9203	4	0	3	0
74.3845	0	30	24.2577	23	25.8078	4	0	5	0
74.4379	1	34	24.2024	31	25.7323	6	0	3	0
74.4913	0	19	24.0948	30	25.6388	5	0	0	0
74.5447	0	22	23.9878	34	25.527	1	0	0	0
74.5981	0	22	23.8815	21	25.4158	4	0	1	0
74.6515	0	22	23.7757	22	25.3051	5	0	3	0
74.7049	0	28	23.6706	30	25.195	3	0	2	0
74.7583	0	27	23.566	29	25.0854	1	0	3	0
74.8116	0	18	23.462	28	24.9764	3	0	0	0
74.865	0	19	23.3585	25	24.8679	2	0	5	0
74.9184	0	23	23.2555	23	24.7599	2	0	1	0
74.9718	0	21	23.1531	21	24.6524	1	0	2	0
75.0252	0	25	23.0512	15	24.5454	4	0	0	0
75.0786	0	22	22.956	18	24.4389	4	0	3	0
75.132	1	33	22.9064	28	24.3693	5	0	1	0
75.1853	0	17	22.8046	22	24.2818	1	0	1	0
75.2387	0	20	22.7033	26	24.1758	5	0	1	0
75.2921	0	24	22.6026	34	24.0704	4	0	0	0
75.3455	0	13	22.5025	21	23.9656	1	0	3	0
75.3989	0	31	22.4029	25	23.8612	5	0	1	0
75.4523	0	26	22.3038	31	23.7573	4	0	7	0
75.5057	0	16	22.2115	23	23.654	3	0	3	0
75.559	1	35	22.1711	17	23.5876	3	0	2	0
75.6124	1	27	22.1234	12	23.5395	3	0	5	0
75.6658	0	17	22.0237	25	23.4546	2	0	5	0
75.7192	0	25	21.9246	24	23.3514	1	0	0	0
75.7726	0	16	21.8324	27	23.2488	1	0	5	0
75.826	1	20	21.786	23	23.1831	3	0	2	0
75.8794	0	20	21.6874	27	23.0995	3	0	2	0
75.9328	0	14	21.5895	26	22.9976	2	0	3	0
75.9861	0	23	21.4923	29	22.8962	5	0	1	0
76.0395	0	26	21.3958	21	22.7955	4	0	2	0
76.0929	0	15	21.2999	26	22.6952	1	0	2	0
76.1463	0	20	21.2046	27	22.5955	1	0	3	0
76.1997	0	22	21.1098	28	22.4964	2	0	5	0
76.2531	0	18	21.0219	26	22.3977	2	0	2	0
76.3065	1	23	20.9921	24	22.336	4	0	1	0
76.3598	2	21	21.0127	14	22.3292	3	0	0	0
76.4132	2	18	21.0186	32	22.3398	2	0	3	0
76.4666	0	21	20.9199	24	22.2763	1	0	5	0
76.52	0	22	20.8221	19	22.1757	2	0	3	0
76.5734	0	23	20.7316	25	22.0758	3	0	1	0
76.6268	1	20	20.6932	30	22.013	0	0	3	0
76.6802	1	19	20.6481	13	21.9688	2	0	2	0
76.7336	0	25	20.5512	20	21.888	3	0	1	0
76.787	0	20	20.4552	20	21.7889	3	0	1	0
76.8403	0	24	20.3664	16	21.6905	5	0	1	0
76.8937	1	16	20.3235	26	21.6293	3	0	0	0
76.9471	0	23	20.2287	21	21.5502	4	0	3	0
77.0005	0	30	20.1348	26	21.4529	3	0	2	0
77.0539	0	16	20.0418	21	21.3563	2	0	0	0
77.1073	0	17	19.9496	27	21.2603	3	0	1	0
77.1607	0	21	19.8581	27	21.165	2	0	4	0
77.214	0	32	19.7673	23	21.0703	4	0	1	0
77.2674	0	31	19.6773	19	20.9762	2	0	1	0
77.3208	0	24	19.5879	17	20.8826	1	0	0	0
77.3742	0	22	19.4991	14	20.7897	1	0	1	0
77.4276	0	25	19.4109	20	20.6972	2	0	2	0
77.481	0	23	19.3296	26	20.6053	2	0	5	0
77.5344	1	16	19.2939	24	20.5504	2	0	1	0
77.5877	0	15	19.2059	22	20.4775	2	0	3	0
77.6411	0	15	19.1187	26	20.3862	6	0	2	0
77.6945	0	23	19.032	19	20.2954	3	0	2	0
77.7479	0	19	18.9459	18	20.2052	2	0	1	0
77.8013	0	26	18.8604	24	20.1156	7	0	2	0
77.8547	0	20	18.7754	28	20.0264	2	0	7	0
77.9081	0	24	18.6909	28	19.9377	3	0	2	0
77.9614	0	20	18.607	20	19.8495	1	0	4	0
78.0148	0	26	18.5235	21	19.7618	4	0	3	0
78.0682	0	23	18.4405	24	19.6745	2	0	0	0
78.1216	0	33	18.358	19	19.5877	3	0	1	0
78.175	0	17	18.276	23	19.5013	4	0	1	0
78.2284	0	10	18.1943	24	19.4154	3	0	3	0
78.2818	0	19	18.1131	20	19.33	1	0	1	0
78.3352	0	14	18.0386	32	19.2449	2	0	4	0
78.3885	1	15	18.0096	19	19.1967	1	0	1	0
78.4419	0	23	17.9282	15	19.1304	1	0	3	0
78.4953	0	19	17.8473	15	19.0457	2	0	2	0
78.5487	0	18	17.7669	18	18.9614	5	0	2	0
78.6021	0	11	17.687	26	18.8775	3	0	0	0
78.6555	0	15	17.6076	16	18.7942	1	0	2	0
78.7089	0	18	17.5286	22	18.7112	3	0	3	0
78.7622	0	17	17.4501	16	18.6287	2	0	5	0
78.8156	0	14	17.3719	17	18.5465	6	0	2	0
78.869	0	24	17.2942	12	18.4648	3	0	2	0
78.9224	0	21	17.2169	17	18.3835	0	0	2	0
78.9758	0	22	17.14	15	18.3026	3	0	2	0
79.0292	0	22	17.0635	23	18.2221	3	0	1	0
79.0826	0	22	16.9874	19	18.142	1	0	2	0
79.136	0	14	16.9117	22	18.0622	0	0	0	0
79.1894	0	19	16.8363	19	17.9828	0	0	0	0
79.2427	0	20	16.7613	23	17.9038	4	0	2	0
79.2961	0	27	16.6867	26	17.8252	4	0	3	0
79.3495	0	23	16.6124	19	17.747	1	0	4	0
79.4029	0	10	16.5385	12	17.6691	2	0	4	0
79.4563	0	12	16.4649	17	17.5915	1	0	1	0
79.5097	0	14	16.3916	29	17.5143	3	0	1	0
79.5631	0	16	16.3187	13	17.4375	1	0	3	0
79.6164	0	20	16.2461	16	17.361	2	0	3	0
79.6698	0	19	16.1739	21	17.2849	6	0	3	0
79.7232	0	17	16.102	16	17.2091	0	0	3	0
79.7766	0	20	16.0428	10	17.1336	3	0	0	0
79.83	2	14	16.0742	11	17.1314	2	0	2	0
79.8834	0	11	16.0004	20	17.0924	0	0	2	0
79.9368	0	18	15.9272	16	17.0161	2	0	1	0
79.9901	0	22	15.8544	20	16.9402	3	0	5	0
80.0435	0	19	15.7822	20	16.8648	3	0	4	0
80.0969	0	20	15.7104	22	16.7898	7	0	2	0
80.1503	0	14	15.6391	17	16.7151	3	0	1	0
80.2037	0	19	15.5683	20	16.6409	1	0	2	0
80.2571	0	15	15.4978	22	16.567	2	0	1	0
80.3105	0	18	15.4278	24	16.4936	0	0	3	0
80.3639	0	24	15.3582	18	16.4205	3	0	0	0
80.4172	0	14	15.289	17	16.3478	0	0	2	0
80.4706	0	16	15.2202	17	16.2754	3	0	1	0
80.524	0	21	15.1517	25	16.2034	2	0	2	0
80.5774	0	20	15.0836	14	16.1318	2	0	1	0
80.6308	0	21	15.0159	20	16.0604	1	0	4	0
80.6842	0	19	14.9485	22	15.9895	0	0	1	0
80.7376	0	18	14.8814	22	15.9189	2	0	1	0
80.7909	0	14	14.8147	15	15.8486	2	0	2	0
80.8443	0	16	14.7483	10	15.7787	3	0	3	0
80.8977	0	15	14.6823	17	15.709	0	0	1	0
80.9511	0	21	14.6166	12	15.6397	4	0	1	0
81.0045	0	19	14.5511	12	15.5708	4	0	4	0
81.0579	0	13	14.486	17	15.5021	3	0	2	0
81.1113	0	13	14.4212	18	15.4338	3	0	2	0
81.1647	0	12	14.3567	17	15.3657	1	0	2	0
81.218	0	23	14.2925	19	15.298	3	0	1	0
81.2714	0	17	14.2286	19	15.2306	3	0	0	0
81.3248	0	20	14.165	15	15.1635	2	0	1	0
81.3782	0	19	14.1079	14	15.0967	6	0	3	0
81.4316	1	10	14.0962	16	15.0666	2	0	1	0
81.485	0	22	14.032	14	15.0183	1	0	2	0
81.5384	0	11	13.9682	22	14.9514	3	0	3	0
81.5918	0	12	13.911	17	14.8849	6	0	1	0
81.6451	1	13	13.8993	17	14.8552	3	0	2	0
81.6985	0	14	13.8352	23	14.8073	4	0	3	0
81.7519	0	20	13.7716	24	14.7409	1	0	3	0
81.8053	0	14	13.7084	17	14.6748	0	0	3	0
81.8587	0	16	13.6456	18	14.6091	1	0	1	0
81.9121	0	8	13.5833	12	14.5437	4	0	1	0
81.9655	0	12	13.5213	20	14.4788	2	0	3	0
82.0188	0	17	13.4597	12	14.4141	4	0	2	0
82.0722	0	23	13.3985	17	14.3498	0	0	0	0
82.1256	0	20	13.3377	14	14.2858	1	0	2	0
82.179	0	14	13.2834	14	14.2222	2	0	2	0
82.2324	1	12	13.2745	11	14.1952	3	0	2	0
82.2858	0	11	13.2133	24	14.1502	4	0	1	0
82.3392	0	15	13.1587	19	14.0865	0	0	2	0
82.3925	1	11	13.1496	17	14.0597	3	0	2	0
82.4459	0	12	13.0944	16	14.0147	1	0	1	0
82.4993	1	15	13.0909	16	13.9876	2	0	3	0
82.5527	1	26	13.0804	12	13.9788	0	0	1	0
82.6061	0	15	13.0176	8	13.933	2	0	3	0
82.6595	0	14	12.9555	14	13.8689	2	0	3	0
82.7129	0	23	12.9002	23	13.8051	2	0	1	0
82.7663	1	16	12.8906	8	13.7783	1	0	2	0
82.8196	0	11	12.8288	16	13.7333	5	0	1	0
82.873	0	19	12.7676	14	13.67	1	0	0	0
82.9264	0	18	12.707	16	13.6071	1	0	0	0
82.9798	0	12	12.647	23	13.5446	4	0	2	0
83.0332	0	19	12.5937	12	13.4825	5	0	2	0
83.0866	1	13	12.586	15	13.4573	3	0	1	0
83.14	0	12	12.526	12	13.414	3	0	2	0
83.1933	0	11	12.4667	18	13.3522	0	0	3	0
83.2467	0	13	12.4078	11	13.2909	5	0	2	0
83.3001	0	19	12.3494	16	13.2299	0	0	0	0
83.3535	0	10	12.2916	14	13.1694	2	0	0	0
83.4069	0	15	12.2342	7	13.1092	5	0	0	0
83.4603	0	16	12.1772	11	13.0495	3	0	5	0
83.5137	0	17	12.1268	6	12.9901	1	0	0	0
83.5671	1	7	12.122	11	12.9674	0	0	4	0
83.6205	0	12	12.0648	11	12.9267	2	0	4	0
83.6738	0	10	12.0143	14	12.8674	0	0	0	0
83.7272	1	12	12.0156	17	12.8449	2	0	3	0
83.7806	1	11	12.0159	11	12.8407	1	0	0	0
83.834	1	13	12.009	18	12.836	1	0	0	0
83.8874	0	5	11.9563	15	12.7943	2	0	1	0
83.9408	1	14	11.9493	16	12.7707	3	0	3	0
83.9942	0	17	11.8903	15	12.729	3	0	2	0
84.0475	0	13	11.8319	19	12.6689	1	0	3	0
84.1009	0	11	11.7742	12	12.6093	4	0	0	0
84.1543	0	11	11.7172	15	12.5503	0	0	0	0
84.2077	0	11	11.6669	12	12.4916	6	0	1	0
84.2611	1	16	11.6624	19	12.4698	0	0	2	0
84.3145	0	13	11.6056	10	12.43	3	0	2	0
84.3679	0	14	11.5494	13	12.3717	2	0	0	0
84.4213	0	12	11.4938	16	12.3138	1	0	0	0
84.4746	0	18	11.4387	8	12.2564	4	0	1	0
[truncated: 2,096 more rows]

## Sheet: Figure 2(g)
0	-0.91799
34	13.4636
13	27.8452
11	42.2268
12	56.6084
16	70.99
18	85.3716
12	99.7532
15	114.135
26	128.516
18	142.898
27	157.28
29	171.661
31	186.043
29	200.424
35	214.806
31	229.188
39	243.569
31	257.951
37	272.332
45	286.714
43	301.096
51	315.477
59	329.859
75	344.24
93	358.622
123	373.004
118	387.385
169	401.767
170	416.148
264	430.53
257	444.912
310	459.293
390	473.675
459	488.056
623	502.438
695	516.82
871	531.201
1161	545.583
1384	559.964
1707	574.346
2110	588.728
2439	603.109
2786	617.491
3149	631.872
3103	646.254
3062	660.636
2732	675.017
2236	689.399
1814	703.78
1202	718.162
840	732.544
567	746.925
358	761.307
244	775.688
156	790.07
92	804.452
84	818.833
60	833.215
38	847.596
35	861.978
28	876.36
18	890.741
18	905.123
10	919.504
10	933.886
7	948.268
7	962.649
4	977.031
9	991.412
1	1005.79
4	1020.18
5	1034.56
2	1048.94
2	1063.32
2	1077.7
2	1092.08
3	1106.47
0	1120.85
1	1135.23
0	1149.61
1	1163.99
1	1178.37
1	1192.75
0	1207.14
1	1221.52
0	1235.9
0	1250.28
1	1264.66
0	1279.04
0	1293.43
0	1307.81
0	1322.19
0	1336.57
1	1350.95
0	1365.33
0	1379.72
0	1394.1
0	1408.48
0	1422.86
0	1437.24

## Sheet: Figure 2(h)
0	-0.9362
0	11.125
0	23.1862
0	35.2473
0	47.3085
0	59.3697
0	71.4309
1	83.4921
0	95.5533
0	107.614
0	119.676
0	131.737
0	143.798
0	155.859
0	167.92
0	179.982
1	192.043
1	204.104
0	216.165
0	228.226
0	240.287
1	252.349
1	264.41
0	276.471
1	288.532
1	300.593
4	312.655
7	324.716
16	336.777
9	348.838
34	360.899
56	372.96
149	385.022
302	397.083
625	409.144
1363	421.205
2580	433.266
4026	445.328
5135	457.389
5323	469.45
4675	481.511
3694	493.572
2692	505.633
2078	517.695
1676	529.756
1448	541.817
1284	553.878
1120	565.939
984	578.001
795	590.062
706	602.123
599	614.184
513	626.245
449	638.306
398	650.368
341	662.429
255	674.49
233	686.551
185	698.612
166	710.674
141	722.735
121	734.796
111	746.857
78	758.918
57	770.98
57	783.041
43	795.102
34	807.163
15	819.224
29	831.285
27	843.347
15	855.408
17	867.469
14	879.53
10	891.591
16	903.653
13	915.714
8	927.775
6	939.836
7	951.897
5	963.958
6	976.02
1	988.081
3	1000.14
2	1012.2
2	1024.26
4	1036.33
3	1048.39
3	1060.45
1	1072.51
1	1084.57
0	1096.63
1	1108.69
1	1120.75
4	1132.81
3	1144.88
2	1156.94
1	1169
2	1181.06
1	1193.12
0	1205.18

## Sheet: Figure 2(i)
-3.73215	0
11.3434	0
26.419	0
41.4945	0
56.5701	0
71.6456	0
86.7212	0
101.797	0
116.872	0
131.948	0
147.023	0
162.099	0
177.175	0
192.25	0
207.326	0
222.401	0
237.477	0
252.552	1
267.628	1
282.703	0
297.779	2
312.855	0
327.93	2
343.006	2
358.081	1
373.157	3
388.232	13
403.308	13
418.383	13
433.459	32
448.535	41
463.61	91
478.686	198
493.761	341
508.837	820
523.912	1565
538.988	2324
554.064	3248
569.139	3399
584.215	3099
599.29	2378
614.366	2036
629.441	1670
644.517	1448
659.592	1208
674.668	1058
689.744	977
704.819	828
719.895	631
734.97	624
750.046	521
765.121	440
780.197	384
795.272	322
810.348	296
825.424	234
840.499	186
855.575	144
870.65	128
885.726	116
900.801	85
915.877	77
930.952	53
946.028	57
961.104	50
976.179	33
991.255	34
1006.33	31
1021.41	29
1036.48	15
1051.56	17
1066.63	9
1081.71	14
1096.78	13
1111.86	9
1126.93	11
1142.01	10
1157.09	5
1172.16	4
1187.24	3
1202.31	2
1217.39	5
1232.46	4
1247.54	3
1262.61	1
1277.69	2
1292.77	3
1307.84	3
1322.92	2
1337.99	1
1353.07	0
1368.14	1
1383.22	1
1398.29	1
1413.37	1
1428.45	1
1443.52	0
1458.6	1
1473.67	1
1488.75	0
1503.82	1
