# Supplementary material for: In-depth chiral sensing capability of C-dots in a biomimetic protein-based hydrogel: a probe for chiral recognition applications
Source: Royal Society of Chemistry journal article supplement (doi:10.1039/d5bm01508a), 2026-01-01
Supplement: d5bm01508a1.zip [file Figure 3.xlsx]

## Sheet: Figure 3 (b)
Z' (kΩ)	-Z'' (kΩ)	Z' (Ω)	-Z'' (Ω)	Z' (Ω)	-Z'' (Ω)	Z' (Ω)	-Z'' (Ω)
633.807	64.0526	195.412	0.70591	164.218	8.74181	170.44	9.3463
631.489	61.3849	195.429	0.87553	164.763	9.46127	170.732	10.0219
635.78	55.3875	195.451	1.0859	165.422	9.10926	171.798	9.65
639.956	49.969	195.478	1.34683	166.536	8.45198	172.615	8.90549
646.111	16.9164	195.511	1.67045	167.954	7.76375	174.265	8.20064
651.096	18.8273	195.552	2.07183	168.785	7.12211	175.643	7.53856
654.977	20.9871	195.602	2.56967	169.232	6.65339	176.699	7.04837
658.81	23.4615	195.665	3.18709	169.53	6.38873	177.484	6.77818
662.115	26.1966	195.744	3.95295	170.121	6.34395	177.078	6.68621
666.116	29.1543	195.841	4.90291	171.106	6.50922	177.757	6.85884
670.038	32.3553	195.961	6.08089	171.312	6.87307	178.788	7.24826
674.351	35.8484	196.11	7.54204	171.996	7.44448	179.285	7.83478
678.572	39.6991	196.295	9.35427	172.601	8.24314	179.954	8.66044
683.26	44.1081	196.525	11.602	172.86	9.28168	180.972	9.7407
687.521	49.1272	196.809	14.3897	174.336	10.5869	181.115	11.0889
692.584	55.1333	197.162	17.8474	174.679	12.2163	181.937	12.7851
697.432	62.3992	197.6	22.1359	176.367	14.2297	182.323	14.8721
702.292	71.3213	198.144	27.4545	177.673	16.7131	182.926	17.436
707.068	82.3321	198.817	34.0519	178.224	19.7843	184.468	20.6166
711.682	95.8614	199.653	42.235	179.606	23.5753	185.518	24.5509
717.623	112.48	200.69	52.3825	179.526	28.2813	187.398	29.4357
724.101	133.203	201.975	64.9691	180.832	34.1097	188.365	35.4789
730.041	158.713	203.57	80.5801	182.511	41.3524	190.276	43.0053
736.331	190.5	205.548	99.9422	184.012	50.3257	191.358	52.3164
742.53	230.359	208.001	123.957	186.1	61.4308	192.827	63.8584
749.218	280.487	211.045	153.741	186.85	75.2421	194.759	78.143
757.345	343.529	214.821	190.683	188.954	92.4856	196.389	95.9571
765.692	422.147	219.505	236.498	190.716	114.028	189.451	118.212
776.093	520.587	225.316	293.329	193.421	141.003	192.135	145.831
789.23	643.508	232.527	363.818	193.709	174.483	195.447	180.478
805.761	795.842	241.473	451.228	197.953	217.143	198.274	223.896
825.601	984.269	252.575	559.648	202.338	270.092	202.837	278.138
850.655	1219.1	266.354	694.117	205.602	336.182	206.87	346.138
879.979	1510.88	283.457	860.894	210.993	418.916	212.514	430.421
915.721	1874.82	304.693	1067.74	217.81	522.507	219.559	536.13
957.616	2325.03	331.064	1324.28	226.723	651.138	227.772	668.521
1010.35	2886.52	363.823	1642.46	236.682	812.332	239.009	833.987
1076.28	3583.7	404.531	2037.05	250.02	1014.04	252.886	1040.57
1158.25	4454.12	455.147	2526.49	267.365	1265.48	270.025	1297.69
1268.13	5527.21	518.117	3133.54	289.394	1579.33	293.347	1619.42
1407.92	6869.55	596.489	3886.24	317.487	1971.22	323.335	2022.82
1586.41	8530.02	694.142	4819.77	355.184	2461.86	361.252	2519.7
1818.69	10570	815.938	5977.48	403.65	3070.98	412.548	3142
2108.9	13149.4	968.046	7413.15	470.749	3835.42	479.7	3922.1
2456.12	16308.4	1158.31	9193.45	557.844	4784.04	572.172	4892.07
2885.64	20211.4	1396.76	11401	677.845	5962.01	693.048	6091.76
3433.62	25048.7	1696.32	14138.2	839.101	7432.85	859.168	7588
4102.53	31030.1	2073.66	17531.6	1062.52	9257.5	1092.02	9451.09
4968.35	38465.4	2550.7	21738.9	1366.37	11512.4	1408.88	11751.8
6095.01	47720.9	3156.2	26954.4	1787.6	14306.6	1855.12	14612.8
7567.26	59296.7	3928.21	33416.9	2371.09	17746.3	2473.5	18124.4
9642.8	73464.4	4918.31	41425.2	3175.15	21924	3355.34	22487.6
12372.6	90928.7	6196.21	51345.5	4308.8	27201.6	4580.92	27774.4
16025.1	112623	7857.67	63630.2	5879.64	33563.1	6317.38	34256.6
20742.3	139699	10035.6	78835.8	8062.67	41264.9	8725.56	42096.5
28204.3	171774	12916.2	97645.1	10959.9	50574.3	12120.9	51517.3
37532.5	211346	16763.1	120893	15034.3	61326.9	16552.2	62530.7
50688	259434	21951.8	149592	20958.7	74951.7	23454.6	76080.1
67818.1	316653	29023.3	184971	28824.2	90408.1	32591.2	91146.1
89864.3	386339	38756.3	228487	39374.8	108239	44773.4	107850
119730	470206	52272.9	281833	53669.9	128151	60923.3	125715
158648	569398	71199	346957	72526.6	149745	81634.3	144238
205407	684015	97860.3	425954	96731.9	172051	107529	162212
267030	816400	135550	520907	127094	194046	138366	177580
344679	974576	188826	633532	163500	213893	173203	188730
443288	1.15264e+06	263777	764549	206240	229452	210853	194954
569979	1.37068e+06	368065	912695	251713	238621	248345	193848
724395	1.60544e+06	510426	1.07334e+06	298855	239798	284286	188402
907295	1.86537e+06	699234	1.2371e+06	343118	232875	316974	178699
1.12988e+06	2.17365e+06	939592	1.38899e+06	382864	222084	346577	165571
1.41015e+06	2.48708e+06	1.2295e+06	1.50969e+06	419278	205132	367921	150832

## Sheet: Figure 3 (c)
-1.4975	-9.99969e-06	-1.4975	-3.66151e-05	-1.4975	-9.99969e-06	-1.4975	-9.99969e-06
-1.49506	-3.12592e-05	-1.49506	-2.96907e-05	-1.49506	-1.27319e-05	-1.49506	-9.47266e-06
-1.49261	-2.70599e-05	-1.49261	-2.57051e-05	-1.49261	-1.073e-05	-1.49261	-7.83691e-06
-1.49017	-2.42615e-05	-1.49017	-2.30714e-05	-1.49017	-9.39636e-06	-1.49017	-6.79321e-06
-1.48773	-2.2226e-05	-1.48773	-2.1161e-05	-1.48773	-8.45032e-06	-1.48773	-6.07605e-06
-1.48529	-2.06696e-05	-1.48529	-1.97084e-05	-1.48529	-7.71484e-06	-1.48529	-5.52979e-06
-1.48285	-1.94214e-05	-1.48285	-1.85517e-05	-1.48285	-7.13501e-06	-1.48285	-5.12695e-06
-1.48041	-1.84052e-05	-1.48041	-1.75935e-05	-1.48041	-6.66199e-06	-1.48041	-4.80957e-06
-1.47797	-1.75446e-05	-1.47797	-1.67817e-05	-1.47797	-6.26831e-06	-1.47797	-4.54742e-06
-1.47552	-1.67938e-05	-1.47552	-1.60798e-05	-1.47552	-5.93567e-06	-1.47552	-4.32068e-06
-1.47308	-1.61377e-05	-1.47308	-1.54634e-05	-1.47308	-5.65186e-06	-1.47308	-4.12384e-06
-1.47064	-1.55579e-05	-1.47064	-1.49324e-05	-1.47064	-5.41077e-06	-1.47064	-3.95172e-06
-1.4682	-1.5033e-05	-1.4682	-1.4441e-05	-1.4682	-5.17578e-06	-1.4682	-3.79364e-06
-1.46576	-1.4566e-05	-1.46576	-1.40046e-05	-1.46576	-4.98352e-06	-1.46576	-3.65051e-06
-1.46332	-1.41266e-05	-1.46332	-1.35896e-05	-1.46332	-4.80042e-06	-1.46332	-3.5202e-06
-1.46088	-1.37268e-05	-1.46088	-1.32081e-05	-1.46088	-4.64264e-06	-1.46088	-3.4021e-06
-1.45844	-1.33514e-05	-1.45844	-1.28572e-05	-1.45844	-4.49615e-06	-1.45844	-3.30292e-06
-1.45599	-1.30035e-05	-1.45599	-1.25428e-05	-1.45599	-4.36035e-06	-1.45599	-3.21533e-06
-1.45355	-1.26801e-05	-1.45355	-1.22499e-05	-1.45355	-4.22913e-06	-1.45355	-3.12866e-06
-1.45111	-1.2381e-05	-1.45111	-1.19661e-05	-1.45111	-4.11102e-06	-1.45111	-3.03619e-06
-1.44867	-1.2088e-05	-1.44867	-1.16914e-05	-1.44867	-3.99872e-06	-1.44867	-2.95502e-06
-1.44623	-1.18225e-05	-1.44623	-1.1432e-05	-1.44623	-3.9032e-06	-1.44623	-2.88727e-06
-1.44379	-1.15601e-05	-1.44379	-1.1194e-05	-1.44379	-3.80219e-06	-1.44379	-2.82013e-06
-1.44135	-1.1319e-05	-1.44135	-1.09681e-05	-1.44135	-3.71338e-06	-1.44135	-2.75635e-06
-1.4389	-1.1084e-05	-1.4389	-1.07515e-05	-1.4389	-3.62579e-06	-1.4389	-2.69623e-06
-1.43646	-1.08551e-05	-1.43646	-1.05409e-05	-1.43646	-3.54675e-06	-1.43646	-2.63916e-06
-1.43402	-1.06323e-05	-1.43402	-1.03395e-05	-1.43402	-3.4668e-06	-1.43402	-2.58301e-06
-1.43158	-1.04248e-05	-1.43158	-1.01503e-05	-1.43158	-3.39264e-06	-1.43158	-2.53265e-06
-1.42914	-1.02203e-05	-1.42914	-9.97021e-06	-1.42914	-3.32092e-06	-1.42914	-2.48657e-06
-1.4267	-1.00372e-05	-1.4267	-9.7932e-06	-1.4267	-3.25287e-06	-1.4267	-2.43988e-06
-1.42426	-9.86023e-06	-1.42426	-9.62231e-06	-1.42426	-3.18634e-06	-1.42426	-2.39014e-06
-1.42181	-9.69543e-06	-1.42181	-9.46056e-06	-1.42181	-3.12592e-06	-1.42181	-2.3465e-06
-1.41937	-9.52454e-06	-1.41937	-9.30187e-06	-1.41937	-3.06854e-06	-1.41937	-2.30469e-06
-1.41693	-9.35974e-06	-1.41693	-9.14623e-06	-1.41693	-3.01331e-06	-1.41693	-2.26471e-06
-1.41449	-9.198e-06	-1.41449	-8.9967e-06	-1.41449	-2.96143e-06	-1.41449	-2.22412e-06
-1.41205	-9.03931e-06	-1.41205	-8.85326e-06	-1.41205	-2.91107e-06	-1.41205	-2.1875e-06
-1.40961	-8.88977e-06	-1.40961	-8.71593e-06	-1.40961	-2.85828e-06	-1.40961	-2.15393e-06
-1.40717	-8.75854e-06	-1.40717	-8.58471e-06	-1.40717	-2.80945e-06	-1.40717	-2.11578e-06
-1.40472	-8.63342e-06	-1.40472	-8.45653e-06	-1.40472	-2.76154e-06	-1.40472	-2.08099e-06
-1.40228	-8.51135e-06	-1.40228	-8.33446e-06	-1.40228	-2.71667e-06	-1.40228	-2.05353e-06
-1.39984	-8.38318e-06	-1.39984	-8.21545e-06	-1.39984	-2.67395e-06	-1.39984	-2.02393e-06
-1.3974	-8.26416e-06	-1.3974	-8.09643e-06	-1.3974	-2.63062e-06	-1.3974	-1.98822e-06
-1.39496	-8.13904e-06	-1.39496	-7.98046e-06	-1.39496	-2.58911e-06	-1.39496	-1.95984e-06
-1.39252	-8.02002e-06	-1.39252	-7.8706e-06	-1.39252	-2.55127e-06	-1.39252	-1.94031e-06
-1.39008	-7.901e-06	-1.39008	-7.75768e-06	-1.39008	-2.51099e-06	-1.39008	-1.91132e-06
-1.38763	-7.78503e-06	-1.38763	-7.65087e-06	-1.38763	-2.4762e-06	-1.38763	-1.88293e-06
-1.38519	-7.67822e-06	-1.38519	-7.54711e-06	-1.38519	-2.43713e-06	-1.38519	-1.85394e-06
-1.38275	-7.57446e-06	-1.38275	-7.4464e-06	-1.38275	-2.40479e-06	-1.38275	-1.82892e-06
-1.38031	-7.4707e-06	-1.38031	-7.34264e-06	-1.38031	-2.37274e-06	-1.38031	-1.79962e-06
-1.37787	-7.37305e-06	-1.37787	-7.25109e-06	-1.37787	-2.33643e-06	-1.37787	-1.77338e-06
-1.37543	-7.27539e-06	-1.37543	-7.16259e-06	-1.37543	-2.29797e-06	-1.37543	-1.74805e-06
-1.37299	-7.17773e-06	-1.37299	-7.07409e-06	-1.37299	-2.26624e-06	-1.37299	-1.72882e-06
-1.37054	-7.08008e-06	-1.37054	-6.97643e-06	-1.37054	-2.23358e-06	-1.37054	-1.70654e-06
-1.3681	-6.98242e-06	-1.3681	-6.88793e-06	-1.3681	-2.20825e-06	-1.3681	-1.67786e-06
-1.36566	-6.88782e-06	-1.36566	-6.80248e-06	-1.36566	-2.17773e-06	-1.36566	-1.65588e-06
-1.36322	-6.80542e-06	-1.36322	-6.72619e-06	-1.36322	-2.14935e-06	-1.36322	-1.63452e-06
-1.36078	-6.72607e-06	-1.36078	-6.64379e-06	-1.36078	-2.12341e-06	-1.36078	-1.61713e-06
-1.35834	-6.63757e-06	-1.35834	-6.5675e-06	-1.35834	-2.09503e-06	-1.35834	-1.59668e-06
-1.3559	-6.55212e-06	-1.3559	-6.4851e-06	-1.3559	-2.0639e-06	-1.3559	-1.5802e-06
-1.35345	-6.47278e-06	-1.35345	-6.41186e-06	-1.35345	-2.03888e-06	-1.35345	-1.55823e-06
-1.35101	-6.39648e-06	-1.35101	-6.33251e-06	-1.35101	-2.01447e-06	-1.35101	-1.53687e-06
-1.34857	-6.32324e-06	-1.34857	-6.26232e-06	-1.34857	-1.9928e-06	-1.34857	-1.51489e-06
-1.34613	-6.24695e-06	-1.34613	-6.18908e-06	-1.34613	-1.96472e-06	-1.34613	-1.49719e-06
-1.34369	-6.17371e-06	-1.34369	-6.11889e-06	-1.34369	-1.94275e-06	-1.34369	-1.48132e-06
-1.34125	-6.10352e-06	-1.34125	-6.0487e-06	-1.34125	-1.91803e-06	-1.34125	-1.46942e-06
-1.33881	-6.03027e-06	-1.33881	-5.98156e-06	-1.33881	-1.89636e-06	-1.33881	-1.45294e-06
-1.33636	-5.96008e-06	-1.33636	-5.91747e-06	-1.33636	-1.87073e-06	-1.33636	-1.43066e-06
-1.33392	-5.896e-06	-1.33392	-5.85338e-06	-1.33392	-1.8512e-06	-1.33392	-1.41602e-06
-1.33148	-5.82886e-06	-1.33148	-5.7893e-06	-1.33148	-1.82617e-06	-1.33148	-1.39465e-06
-1.32904	-5.76477e-06	-1.32904	-5.72826e-06	-1.32904	-1.80206e-06	-1.32904	-1.37756e-06
-1.3266	-5.70068e-06	-1.3266	-5.66723e-06	-1.3266	-1.78131e-06	-1.3266	-1.36108e-06
-1.32416	-5.6366e-06	-1.32416	-5.60619e-06	-1.32416	-1.75751e-06	-1.32416	-1.34186e-06
-1.32172	-5.57861e-06	-1.32172	-5.54821e-06	-1.32172	-1.73889e-06	-1.32172	-1.32965e-06
-1.31927	-5.52673e-06	-1.31927	-5.49023e-06	-1.31927	-1.71875e-06	-1.31927	-1.31317e-06
-1.31683	-5.4718e-06	-1.31683	-5.43224e-06	-1.31683	-1.70044e-06	-1.31683	-1.29761e-06
-1.31439	-5.41382e-06	-1.31439	-5.37731e-06	-1.31439	-1.68365e-06	-1.31439	-1.28723e-06
-1.31195	-5.34973e-06	-1.31195	-5.31933e-06	-1.31195	-1.66138e-06	-1.31195	-1.27258e-06
-1.30951	-5.2948e-06	-1.30951	-5.2644e-06	-1.30951	-1.64703e-06	-1.30951	-1.26495e-06
-1.30707	-5.24292e-06	-1.30707	-5.20946e-06	-1.30707	-1.62598e-06	-1.30707	-1.24969e-06
-1.30463	-5.19409e-06	-1.30463	-5.15453e-06	-1.30463	-1.61072e-06	-1.30463	-1.23474e-06
-1.30219	-5.14221e-06	-1.30219	-5.10265e-06	-1.30219	-1.59363e-06	-1.30219	-1.2204e-06
-1.29974	-5.09033e-06	-1.29974	-5.04772e-06	-1.29974	-1.5741e-06	-1.29974	-1.2085e-06
-1.2973	-5.0354e-06	-1.2973	-4.99279e-06	-1.2973	-1.5564e-06	-1.2973	-1.19568e-06
-1.29486	-4.98352e-06	-1.29486	-4.94701e-06	-1.29486	-1.54114e-06	-1.29486	-1.18286e-06
-1.29242	-4.93774e-06	-1.29242	-4.89941e-06	-1.29242	-1.52313e-06	-1.29242	-1.16913e-06
-1.28998	-4.90112e-06	-1.28998	-4.85576e-06	-1.28998	-1.51062e-06	-1.28998	-1.15784e-06
-1.28754	-4.8584e-06	-1.28754	-4.81518e-06	-1.28754	-1.49475e-06	-1.28754	-1.14716e-06
-1.2851	-4.81567e-06	-1.2851	-4.78039e-06	-1.2851	-1.48132e-06	-1.2851	-1.13434e-06
-1.28265	-4.77051e-06	-1.28265	-4.74193e-06	-1.28265	-1.46515e-06	-1.28265	-1.12579e-06
-1.28021	-4.72748e-06	-1.28021	-4.69524e-06	-1.28021	-1.45264e-06	-1.28021	-1.1145e-06
-1.27777	-4.68201e-06	-1.27777	-4.65069e-06	-1.27777	-1.43433e-06	-1.27777	-1.10291e-06
-1.27533	-4.63806e-06	-1.27533	-4.60552e-06	-1.27533	-1.42242e-06	-1.27533	-1.09222e-06
-1.27289	-4.59167e-06	-1.27289	-4.5628e-06	-1.27289	-1.40717e-06	-1.27289	-1.08276e-06
-1.27045	-4.55048e-06	-1.27045	-4.52312e-06	-1.27045	-1.39496e-06	-1.27045	-1.07178e-06
-1.26801	-4.50623e-06	-1.26801	-4.48223e-06	-1.26801	-1.37878e-06	-1.26801	-1.06628e-06
-1.26556	-4.46472e-06	-1.26556	-4.44469e-06	-1.26556	-1.3678e-06	-1.26556	-1.05865e-06
-1.26312	-4.42352e-06	-1.26312	-4.41112e-06	-1.26312	-1.35559e-06	-1.26312	-1.04675e-06
-1.26068	-4.38232e-06	-1.26068	-4.37633e-06	-1.26068	-1.34125e-06	-1.26068	-1.03485e-06
-1.25824	-4.34448e-06	-1.25824	-4.33758e-06	-1.25824	-1.32935e-06	-1.25824	-1.02234e-06
-1.2558	-4.30878e-06	-1.2558	-4.30401e-06	-1.2558	-1.31439e-06	-1.2558	-1.01105e-06
-1.25336	-4.27063e-06	-1.25336	-4.2683e-06	-1.25336	-1.30188e-06	-1.25336	-1.00098e-06
-1.25092	-4.2334e-06	-1.25092	-4.23534e-06	-1.25092	-1.28632e-06	-1.25092	-9.90906e-07
-1.24847	-4.19861e-06	-1.24847	-4.20208e-06	-1.24847	-1.27563e-06	-1.24847	-9.80835e-07
-1.24603	-4.16199e-06	-1.24603	-4.1682e-06	-1.24603	-1.26526e-06	-1.24603	-9.7168e-07
-1.24359	-4.12811e-06	-1.24359	-4.13372e-06	-1.24359	-1.25336e-06	-1.24359	-9.6405e-07
-1.24115	-4.09149e-06	-1.24115	-4.10198e-06	-1.24115	-1.24268e-06	-1.24115	-9.55811e-07
-1.23871	-4.05609e-06	-1.23871	-4.06689e-06	-1.23871	-1.22925e-06	-1.23871	-9.46045e-07
-1.23627	-4.02191e-06	-1.23627	-4.03515e-06	-1.23627	-1.21674e-06	-1.23627	-9.39026e-07
-1.23383	-3.98682e-06	-1.23383	-4.00097e-06	-1.23383	-1.20514e-06	-1.23383	-9.32922e-07
-1.23138	-3.95538e-06	-1.23138	-3.96953e-06	-1.23138	-1.19568e-06	-1.23138	-9.26208e-07
-1.22894	-3.92242e-06	-1.22894	-3.94329e-06	-1.22894	-1.18256e-06	-1.22894	-9.18579e-07
-1.2265	-3.88702e-06	-1.2265	-3.91369e-06	-1.2265	-1.17218e-06	-1.2265	-9.11865e-07
-1.22406	-3.85254e-06	-1.22406	-3.88592e-06	-1.22406	-1.16211e-06	-1.22406	-9.06372e-07
-1.22162	-3.81866e-06	-1.22162	-3.85509e-06	-1.22162	-1.15234e-06	-1.22162	-8.98132e-07
-1.21918	-3.78601e-06	-1.21918	-3.82854e-06	-1.21918	-1.14044e-06	-1.21918	-8.89587e-07
-1.21674	-3.75305e-06	-1.21674	-3.8026e-06	-1.21674	-1.13037e-06	-1.21674	-8.80127e-07
-1.21429	-3.72375e-06	-1.21429	-3.77453e-06	-1.21429	-1.11969e-06	-1.21429	-8.71277e-07
-1.21185	-3.69812e-06	-1.21185	-3.75225e-06	-1.21185	-1.10992e-06	-1.21185	-8.60901e-07
-1.20941	-3.67126e-06	-1.20941	-3.726e-06	-1.20941	-1.09833e-06	-1.20941	-8.53271e-07
-1.20697	-3.64502e-06	-1.20697	-3.70067e-06	-1.20697	-1.08948e-06	-1.20697	-8.44421e-07
-1.20453	-3.61633e-06	-1.20453	-3.67504e-06	-1.20453	-1.08002e-06	-1.20453	-8.38623e-07
-1.20209	-3.591e-06	-1.20209	-3.65185e-06	-1.20209	-1.07147e-06	-1.20209	-8.32214e-07
-1.19965	-3.56567e-06	-1.19965	-3.62835e-06	-1.19965	-1.06049e-06	-1.19965	-8.25195e-07
-1.1972	-3.54095e-06	-1.1972	-3.60638e-06	-1.1972	-1.05194e-06	-1.1972	-8.17566e-07
-1.19476	-3.51257e-06	-1.19476	-3.58257e-06	-1.19476	-1.04218e-06	-1.19476	-8.12378e-07
-1.19232	-3.48816e-06	-1.19232	-3.56151e-06	-1.19232	-1.0321e-06	-1.19232	-8.06885e-07
-1.18988	-3.46069e-06	-1.18988	-3.53649e-06	-1.18988	-1.02203e-06	-1.18988	-7.97424e-07
-1.18744	-3.43597e-06	-1.18744	-3.51452e-06	-1.18744	-1.01227e-06	-1.18744	-7.91626e-07
-1.185	-3.41187e-06	-1.185	-3.48949e-06	-1.185	-1.00372e-06	-1.185	-7.83997e-07
-1.18256	-3.38593e-06	-1.18256	-3.4663e-06	-1.18256	-9.93652e-07	-1.18256	-7.76978e-07
-1.18011	-3.36395e-06	-1.18011	-3.44402e-06	-1.18011	-9.84497e-07	-1.18011	-7.69043e-07
-1.17767	-3.34045e-06	-1.17767	-3.42266e-06	-1.17767	-9.75342e-07	-1.17767	-7.6355e-07
-1.17523	-3.31696e-06	-1.17523	-3.40099e-06	-1.17523	-9.66492e-07	-1.17523	-7.56836e-07
-1.17279	-3.29468e-06	-1.17279	-3.37658e-06	-1.17279	-9.58862e-07	-1.17279	-7.52258e-07
-1.17035	-3.27576e-06	-1.17035	-3.35186e-06	-1.17035	-9.47571e-07	-1.17035	-7.4646e-07
-1.16791	-3.25317e-06	-1.16791	-3.3308e-06	-1.16791	-9.39636e-07	-1.16791	-7.40967e-07
-1.16547	-3.23181e-06	-1.16547	-3.30761e-06	-1.16547	-9.29565e-07	-1.16547	-7.36084e-07
-1.16302	-3.21136e-06	-1.16302	-3.28533e-06	-1.16302	-9.198e-07	-1.16302	-7.31506e-07
-1.16058	-3.18939e-06	-1.16058	-3.26122e-06	-1.16058	-9.1156e-07	-1.16058	-7.27844e-07
-1.15814	-3.16711e-06	-1.15814	-3.23925e-06	-1.15814	-9.0271e-07	-1.15814	-7.22961e-07
-1.1557	-3.14789e-06	-1.1557	-3.21545e-06	-1.1557	-8.95386e-07	-1.1557	-7.16553e-07
-1.15326	-3.12439e-06	-1.15326	-3.19286e-06	-1.15326	-8.87756e-07	-1.15326	-7.10449e-07
-1.15082	-3.10303e-06	-1.15082	-3.17425e-06	-1.15082	-8.79211e-07	-1.15082	-7.04956e-07
-1.14838	-3.0835e-06	-1.14838	-3.15655e-06	-1.14838	-8.74023e-07	-1.14838	-7.01904e-07
-1.14594	-3.06305e-06	-1.14594	-3.13824e-06	-1.14594	-8.64868e-07	-1.14594	-6.97327e-07
-1.14349	-3.04657e-06	-1.14349	-3.12206e-06	-1.14349	-8.56628e-07	-1.14349	-6.90002e-07
-1.14105	-3.02368e-06	-1.14105	-3.10253e-06	-1.14105	-8.48999e-07	-1.14105	-6.85425e-07
-1.13861	-3.00476e-06	-1.13861	-3.08605e-06	-1.13861	-8.41064e-07	-1.13861	-6.81458e-07
-1.13617	-2.98492e-06	-1.13617	-3.06866e-06	-1.13617	-8.31909e-07	-1.13617	-6.74133e-07
-1.13373	-2.96478e-06	-1.13373	-3.05004e-06	-1.13373	-8.24585e-07	-1.13373	-6.67114e-07
-1.13129	-2.94586e-06	-1.13129	-3.03081e-06	-1.13129	-8.17871e-07	-1.13129	-6.60706e-07
-1.12885	-2.92694e-06	-1.12885	-3.01433e-06	-1.12885	-8.11462e-07	-1.12885	-6.56128e-07
-1.1264	-2.90924e-06	-1.1264	-2.99358e-06	-1.1264	-8.02612e-07	-1.1264	-6.51245e-07
-1.12396	-2.89032e-06	-1.12396	-2.97619e-06	-1.12396	-7.97119e-07	-1.12396	-6.46973e-07
-1.12152	-2.87018e-06	-1.12152	-2.95635e-06	-1.12152	-7.9071e-07	-1.12152	-6.43005e-07
-1.11908	-2.85126e-06	-1.11908	-2.94079e-06	-1.11908	-7.8186e-07	-1.11908	-6.37207e-07
-1.11664	-2.83173e-06	-1.11664	-2.92431e-06	-1.11664	-7.73315e-07	-1.11664	-6.32935e-07
-1.1142	-2.81311e-06	-1.1142	-2.90813e-06	-1.1142	-7.68738e-07	-1.1142	-6.28357e-07
-1.11176	-2.79236e-06	-1.11176	-2.88921e-06	-1.11176	-7.61108e-07	-1.11176	-6.22864e-07
-1.10931	-2.77374e-06	-1.10931	-2.87121e-06	-1.10931	-7.53784e-07	-1.10931	-6.17981e-07
-1.10687	-2.76062e-06	-1.10687	-2.85351e-06	-1.10687	-7.45544e-07	-1.10687	-6.11877e-07
-1.10443	-2.7417e-06	-1.10443	-2.83489e-06	-1.10443	-7.39441e-07	-1.10443	-6.07605e-07
-1.10199	-2.72522e-06	-1.10199	-2.8178e-06	-1.10199	-7.32727e-07	-1.10199	-6.03638e-07
-1.09955	-2.71057e-06	-1.09955	-2.80071e-06	-1.09955	-7.26013e-07	-1.09955	-5.99976e-07
-1.09711	-2.69562e-06	-1.09711	-2.78606e-06	-1.09711	-7.19299e-07	-1.09711	-5.96008e-07
-1.09467	-2.68036e-06	-1.09467	-2.7708e-06	-1.09467	-7.14417e-07	-1.09467	-5.92651e-07
-1.09222	-2.66235e-06	-1.09222	-2.75463e-06	-1.09222	-7.06787e-07	-1.09222	-5.87463e-07
-1.08978	-2.64893e-06	-1.08978	-2.73754e-06	-1.08978	-7.01599e-07	-1.08978	-5.82886e-07
-1.08734	-2.63367e-06	-1.08734	-2.72198e-06	-1.08734	-6.94885e-07	-1.08734	-5.75562e-07
-1.0849	-2.61841e-06	-1.0849	-2.70672e-06	-1.0849	-6.88477e-07	-1.0849	-5.71594e-07
-1.08246	-2.59857e-06	-1.08246	-2.69176e-06	-1.08246	-6.82068e-07	-1.08246	-5.67627e-07
-1.08002	-2.58545e-06	-1.08002	-2.67742e-06	-1.08002	-6.75354e-07	-1.08002	-5.61829e-07
-1.07758	-2.57019e-06	-1.07758	-2.66277e-06	-1.07758	-6.68335e-07	-1.07758	-5.57251e-07
-1.07513	-2.55646e-06	-1.07513	-2.64812e-06	-1.07513	-6.62842e-07	-1.07513	-5.54504e-07
-1.07269	-2.54303e-06	-1.07269	-2.63378e-06	-1.07269	-6.56738e-07	-1.07269	-5.50232e-07
-1.07025	-2.52686e-06	-1.07025	-2.61913e-06	-1.07025	-6.5155e-07	-1.07025	-5.4657e-07
-1.06781	-2.51251e-06	-1.06781	-2.60692e-06	-1.06781	-6.44836e-07	-1.06781	-5.43518e-07
-1.06537	-2.49786e-06	-1.06537	-2.59502e-06	-1.06537	-6.39648e-07	-1.06537	-5.39856e-07
-1.06293	-2.48413e-06	-1.06293	-2.58037e-06	-1.06293	-6.34155e-07	-1.06293	-5.36499e-07
-1.06049	-2.47131e-06	-1.06049	-2.56695e-06	-1.06049	-6.27747e-07	-1.06049	-5.31921e-07
-1.05804	-2.4585e-06	-1.05804	-2.55169e-06	-1.05804	-6.23779e-07	-1.05804	-5.27649e-07
-1.0556	-2.44507e-06	-1.0556	-2.54131e-06	-1.0556	-6.17065e-07	-1.0556	-5.24292e-07
-1.05316	-2.43134e-06	-1.05316	-2.5288e-06	-1.05316	-6.11267e-07	-1.05316	-5.19104e-07
-1.05072	-2.42035e-06	-1.05072	-2.51385e-06	-1.05072	-6.05774e-07	-1.05072	-5.15442e-07
-1.04828	-2.40814e-06	-1.04828	-2.50164e-06	-1.04828	-6.00891e-07	-1.04828	-5.12085e-07
-1.04584	-2.39563e-06	-1.04584	-2.4876e-06	-1.04584	-5.96313e-07	-1.04584	-5.06592e-07
-1.0434	-2.37885e-06	-1.0434	-2.47417e-06	-1.0434	-5.896e-07	-1.0434	-5.01709e-07
-1.04095	-2.36542e-06	-1.04095	-2.46075e-06	-1.04095	-5.84106e-07	-1.04095	-4.97742e-07
-1.03851	-2.35046e-06	-1.03851	-2.44549e-06	-1.03851	-5.77698e-07	-1.03851	-4.93774e-07
-1.03607	-2.33734e-06	-1.03607	-2.43328e-06	-1.03607	-5.7312e-07	-1.03607	-4.91333e-07
-1.03363	-2.32422e-06	-1.03363	-2.42046e-06	-1.03363	-5.67017e-07	-1.03363	-4.87671e-07
-1.03119	-2.3114e-06	-1.03119	-2.41131e-06	-1.03119	-5.62744e-07	-1.03119	-4.83704e-07
-1.02875	-2.29797e-06	-1.02875	-2.40154e-06	-1.02875	-5.56946e-07	-1.02875	-4.7934e-07
-1.02631	-2.28699e-06	-1.02631	-2.38903e-06	-1.02631	-5.51758e-07	-1.02631	-4.74731e-07
-1.02386	-2.27142e-06	-1.02386	-2.37499e-06	-1.02386	-5.45959e-07	-1.02386	-4.71436e-07
-1.02142	-2.25922e-06	-1.02142	-2.36156e-06	-1.02142	-5.41382e-07	-1.02142	-4.68414e-07
-1.01898	-2.2464e-06	-1.01898	-2.35271e-06	-1.01898	-5.36194e-07	-1.01898	-4.6521e-07
-1.01654	-2.23236e-06	-1.01654	-2.34112e-06	-1.01654	-5.3009e-07	-1.01654	-4.62189e-07
-1.0141	-2.21893e-06	-1.0141	-2.32921e-06	-1.0141	-5.25208e-07	-1.0141	-4.5813e-07
-1.01166	-2.20459e-06	-1.01166	-2.3164e-06	-1.01166	-5.2124e-07	-1.01166	-4.53979e-07
-1.00922	-2.19116e-06	-1.00922	-2.30389e-06	-1.00922	-5.14832e-07	-1.00922	-4.48975e-07
-1.00677	-2.18109e-06	-1.00677	-2.29198e-06	-1.00677	-5.10559e-07	-1.00677	-4.44489e-07
-1.00433	-2.16766e-06	-1.00433	-2.27947e-06	-1.00433	-5.04761e-07	-1.00433	-4.40796e-07
-1.00189	-2.15607e-06	-1.00189	-2.26848e-06	-1.00189	-5.00793e-07	-1.00189	-4.38171e-07
-0.99945	-2.14325e-06	-0.99945	-2.25994e-06	-0.99945	-4.953e-07	-0.99945	-4.34143e-07
-0.99701	-2.13196e-06	-0.99701	-2.25017e-06	-0.99701	-4.89197e-07	-0.99701	-4.31091e-07
-0.99457	-2.11945e-06	-0.99457	-2.23797e-06	-0.99457	-4.84924e-07	-0.99457	-4.27155e-07
-0.99213	-2.10785e-06	-0.99213	-2.22454e-06	-0.99213	-4.80347e-07	-0.99213	-4.23889e-07
-0.98969	-2.09595e-06	-0.98969	-2.21386e-06	-0.98969	-4.74854e-07	-0.98969	-4.20898e-07
-0.98724	-2.08771e-06	-0.98724	-2.20104e-06	-0.98724	-4.70276e-07	-0.98724	-4.16351e-07
-0.9848	-2.07794e-06	-0.9848	-2.19005e-06	-0.9848	-4.65363e-07	-0.9848	-4.13239e-07
-0.98236	-2.06665e-06	-0.98236	-2.17815e-06	-0.98236	-4.59686e-07	-0.98236	-4.09637e-07
-0.97992	-2.05505e-06	-0.97992	-2.17022e-06	-0.97992	-4.55261e-07	-0.97992	-4.0625e-07
-0.97748	-2.04407e-06	-0.97748	-2.16137e-06	-0.97748	-4.51202e-07	-0.97748	-4.03137e-07
-0.97504	-2.03278e-06	-0.97504	-2.15069e-06	-0.97504	-4.46228e-07	-0.97504	-4.01306e-07
-0.9726	-2.02332e-06	-0.9726	-2.13878e-06	-0.9726	-4.42322e-07	-0.9726	-3.97827e-07
-0.97015	-2.01416e-06	-0.97015	-2.12841e-06	-0.97015	-4.38507e-07	-0.97015	-3.94897e-07
-0.96771	-2.00348e-06	-0.96771	-2.11742e-06	-0.96771	-4.3457e-07	-0.96771	-3.9209e-07
-0.96527	-1.99188e-06	-0.96527	-2.10705e-06	-0.96527	-4.30145e-07	-0.96527	-3.88336e-07
-0.96283	-1.97968e-06	-0.96283	-2.09606e-06	-0.96283	-4.2691e-07	-0.96283	-3.8562e-07
-0.96039	-1.96686e-06	-0.96039	-2.08446e-06	-0.96039	-4.22211e-07	-0.96039	-3.81866e-07
-0.95795	-1.95648e-06	-0.95795	-2.07348e-06	-0.95795	-4.19098e-07	-0.95795	-3.78571e-07
-0.95551	-1.94489e-06	-0.95551	-2.06188e-06	-0.95551	-4.14398e-07	-0.95551	-3.75732e-07
-0.95306	-1.93512e-06	-0.95306	-2.05669e-06	-0.95306	-4.10034e-07	-0.95306	-3.73657e-07
-0.95062	-1.92352e-06	-0.95062	-2.0451e-06	-0.95062	-4.05487e-07	-0.95062	-3.70667e-07
-0.94818	-1.91406e-06	-0.94818	-2.03716e-06	-0.94818	-4.01917e-07	-0.94818	-3.67706e-07
-0.94574	-1.90521e-06	-0.94574	-2.02495e-06	-0.94574	-3.97797e-07	-0.94574	-3.64136e-07
-0.9433	-1.89453e-06	-0.9433	-2.0158e-06	-0.9433	-3.93188e-07	-0.9433	-3.61389e-07
-0.94086	-1.88385e-06	-0.94086	-2.00817e-06	-0.94086	-3.88824e-07	-0.94086	-3.57666e-07
-0.93842	-1.87531e-06	-0.93842	-1.9984e-06	-0.93842	-3.85315e-07	-0.93842	-3.54309e-07
-0.93597	-1.86707e-06	-0.93597	-1.98742e-06	-0.93597	-3.81073e-07	-0.93597	-3.50159e-07
-0.93353	-1.85455e-06	-0.93353	-1.97704e-06	-0.93353	-3.7674e-07	-0.93353	-3.47321e-07
-0.93109	-1.84509e-06	-0.93109	-1.96667e-06	-0.93109	-3.72894e-07	-0.93109	-3.4314e-07
-0.92865	-1.83319e-06	-0.92865	-1.95812e-06	-0.92865	-3.68835e-07	-0.92865	-3.3844e-07
-0.92621	-1.82465e-06	-0.92621	-1.94866e-06	-0.92621	-3.6496e-07	-0.92621	-3.35632e-07
-0.92377	-1.81519e-06	-0.92377	-1.93798e-06	-0.92377	-3.60779e-07	-0.92377	-3.32428e-07
-0.92133	-1.80359e-06	-0.92133	-1.92943e-06	-0.92133	-3.5672e-07	-0.92133	-3.29041e-07
-0.91888	-1.79169e-06	-0.91888	-1.92089e-06	-0.91888	-3.52295e-07	-0.91888	-3.26172e-07
-0.91644	-1.78375e-06	-0.91644	-1.91265e-06	-0.91644	-3.48175e-07	-0.91644	-3.22601e-07
-0.914	-1.7749e-06	-0.914	-1.9038e-06	-0.914	-3.44391e-07	-0.914	-3.20343e-07
-0.91156	-1.76514e-06	-0.91156	-1.89403e-06	-0.91156	-3.41156e-07	-0.91156	-3.17566e-07
-0.90912	-1.75629e-06	-0.90912	-1.88244e-06	-0.90912	-3.37555e-07	-0.90912	-3.14178e-07
-0.90668	-1.74591e-06	-0.90668	-1.87359e-06	-0.90668	-3.34595e-07	-0.90668	-3.11523e-07
-0.90424	-1.73553e-06	-0.90424	-1.86535e-06	-0.90424	-3.3078e-07	-0.90424	-3.08807e-07
-0.90179	-1.72607e-06	-0.90179	-1.85375e-06	-0.90179	-3.27026e-07	-0.90179	-3.05573e-07
-0.89935	-1.71539e-06	-0.89935	-1.84582e-06	-0.89935	-3.23608e-07	-0.89935	-3.02551e-07
-0.89691	-1.70624e-06	-0.89691	-1.83514e-06	-0.89691	-3.20007e-07	-0.89691	-2.99408e-07
-0.89447	-1.69617e-06	-0.89447	-1.82751e-06	-0.89447	-3.16528e-07	-0.89447	-2.96661e-07
-0.89203	-1.68579e-06	-0.89203	-1.81927e-06	-0.89203	-3.12866e-07	-0.89203	-2.93732e-07
-0.88959	-1.67816e-06	-0.88959	-1.80981e-06	-0.88959	-3.08838e-07	-0.88959	-2.901e-07
-0.88715	-1.6687e-06	-0.88715	-1.80096e-06	-0.88715	-3.05603e-07	-0.88715	-2.87781e-07
-0.8847	-1.6568e-06	-0.8847	-1.7918e-06	-0.8847	-3.01849e-07	-0.8847	-2.84027e-07
-0.88226	-1.64673e-06	-0.88226	-1.78356e-06	-0.88226	-2.98309e-07	-0.88226	-2.82135e-07
-0.87982	-1.63757e-06	-0.87982	-1.77502e-06	-0.87982	-2.94586e-07	-0.87982	-2.80121e-07
-0.87738	-1.62872e-06	-0.87738	-1.76555e-06	-0.87738	-2.91046e-07	-0.87738	-2.76917e-07
-0.87494	-1.61926e-06	-0.87494	-1.75701e-06	-0.87494	-2.88055e-07	-0.87494	-2.7475e-07
-0.8725	-1.60706e-06	-0.8725	-1.74785e-06	-0.8725	-2.83844e-07	-0.8725	-2.72278e-07
-0.87006	-1.59912e-06	-0.87006	-1.73931e-06	-0.87006	-2.80609e-07	-0.87006	-2.70233e-07
-0.86761	-1.58966e-06	-0.86761	-1.72741e-06	-0.86761	-2.76764e-07	-0.86761	-2.66998e-07
-0.86517	-1.58142e-06	-0.86517	-1.71886e-06	-0.86517	-2.73987e-07	-0.86517	-2.63794e-07
-0.86273	-1.57257e-06	-0.86273	-1.70849e-06	-0.86273	-2.70538e-07	-0.86273	-2.6178e-07
-0.86029	-1.56342e-06	-0.86029	-1.69933e-06	-0.86029	-2.67365e-07	-0.86029	-2.58057e-07
-0.85785	-1.55426e-06	-0.85785	-1.69048e-06	-0.85785	-2.63916e-07	-0.85785	-2.55463e-07
-0.85541	-1.54297e-06	-0.85541	-1.68011e-06	-0.85541	-2.61597e-07	-0.85541	-2.52502e-07
-0.85297	-1.53564e-06	-0.85297	-1.66942e-06	-0.85297	-2.58026e-07	-0.85297	-2.50336e-07
-0.85052	-1.52588e-06	-0.85052	-1.66088e-06	-0.85052	-2.54883e-07	-0.85052	-2.47528e-07
-0.84808	-1.51703e-06	-0.84808	-1.65111e-06	-0.84808	-2.51495e-07	-0.84808	-2.45453e-07
-0.84564	-1.5094e-06	-0.84564	-1.64196e-06	-0.84564	-2.48138e-07	-0.84564	-2.43805e-07
-0.8432	-1.49902e-06	-0.8432	-1.6325e-06	-0.8432	-2.45117e-07	-0.8432	-2.4118e-07
-0.84076	-1.49017e-06	-0.84076	-1.62243e-06	-0.84076	-2.41669e-07	-0.84076	-2.39197e-07
-0.83832	-1.47827e-06	-0.83832	-1.61358e-06	-0.83832	-2.38281e-07	-0.83832	-2.3642e-07
-0.83588	-1.47125e-06	-0.83588	-1.60503e-06	-0.83588	-2.35199e-07	-0.83588	-2.33917e-07
-0.83344	-1.46149e-06	-0.83344	-1.59679e-06	-0.83344	-2.31659e-07	-0.83344	-2.31171e-07
-0.83099	-1.45233e-06	-0.83099	-1.58855e-06	-0.83099	-2.29279e-07	-0.83099	-2.27295e-07
-0.82855	-1.44409e-06	-0.82855	-1.58153e-06	-0.82855	-2.26257e-07	-0.82855	-2.24854e-07
-0.82611	-1.43524e-06	-0.82611	-1.5739e-06	-0.82611	-2.23175e-07	-0.82611	-2.2226e-07
-0.82367	-1.42517e-06	-0.82367	-1.56566e-06	-0.82367	-2.20215e-07	-0.82367	-2.19635e-07
-0.82123	-1.41571e-06	-0.82123	-1.55895e-06	-0.82123	-2.17804e-07	-0.82123	-2.17957e-07
-0.81879	-1.40594e-06	-0.81879	-1.55102e-06	-0.81879	-2.15118e-07	-0.81879	-2.14874e-07
-0.81635	-1.40015e-06	-0.81635	-1.54186e-06	-0.81635	-2.12097e-07	-0.81635	-2.13165e-07
-0.8139	-1.39008e-06	-0.8139	-1.5321e-06	-0.8139	-2.09595e-07	-0.8139	-2.10632e-07
-0.81146	-1.38153e-06	-0.81146	-1.52264e-06	-0.81146	-2.07306e-07	-0.81146	-2.07916e-07
-0.80902	-1.37115e-06	-0.80902	-1.51256e-06	-0.80902	-2.04895e-07	-0.80902	-2.06451e-07
-0.80658	-1.36292e-06	-0.80658	-1.50463e-06	-0.80658	-2.02515e-07	-0.80658	-2.04041e-07
-0.80414	-1.35437e-06	-0.80414	-1.49547e-06	-0.80414	-1.9928e-07	-0.80414	-2.02423e-07
-0.8017	-1.34735e-06	-0.8017	-1.48876e-06	-0.8017	-1.97235e-07	-0.8017	-2.00562e-07
-0.79926	-1.3385e-06	-0.79926	-1.48083e-06	-0.79926	-1.94489e-07	-0.79926	-1.98181e-07
-0.79681	-1.32965e-06	-0.79681	-1.4735e-06	-0.79681	-1.92108e-07	-0.79681	-1.9635e-07
-0.79437	-1.32141e-06	-0.79437	-1.46465e-06	-0.79437	-1.90308e-07	-0.79437	-1.94e-07
-0.79193	-1.31287e-06	-0.79193	-1.45519e-06	-0.79193	-1.88232e-07	-0.79193	-1.92047e-07
-0.78949	-1.30432e-06	-0.78949	-1.44817e-06	-0.78949	-1.85822e-07	-0.78949	-1.89819e-07
-0.78705	-1.29669e-06	-0.78705	-1.43841e-06	-0.78705	-1.83289e-07	-0.78705	-1.8808e-07
-0.78461	-1.28815e-06	-0.78461	-1.43017e-06	-0.78461	-1.80939e-07	-0.78461	-1.85455e-07
-0.78217	-1.27991e-06	-0.78217	-1.42315e-06	-0.78217	-1.79169e-07	-0.78217	-1.83441e-07
-0.77972	-1.27197e-06	-0.77972	-1.41338e-06	-0.77972	-1.77216e-07	-0.77972	-1.81732e-07
-0.77728	-1.26251e-06	-0.77728	-1.40636e-06	-0.77728	-1.74652e-07	-0.77728	-1.80084e-07
-0.77484	-1.25366e-06	-0.77484	-1.39751e-06	-0.77484	-1.72546e-07	-0.77484	-1.77795e-07
-0.7724	-1.24573e-06	-0.7724	-1.38958e-06	-0.7724	-1.70685e-07	-0.7724	-1.75995e-07
-0.76996	-1.2381e-06	-0.76996	-1.38164e-06	-0.76996	-1.68671e-07	-0.76996	-1.74103e-07
-0.76752	-1.22986e-06	-0.76752	-1.37432e-06	-0.76752	-1.67053e-07	-0.76752	-1.72791e-07
-0.76508	-1.2204e-06	-0.76508	-1.36669e-06	-0.76508	-1.65009e-07	-0.76508	-1.7038e-07
-0.76263	-1.21185e-06	-0.76263	-1.35906e-06	-0.76263	-1.63208e-07	-0.76263	-1.68762e-07
-0.76019	-1.20514e-06	-0.76019	-1.35143e-06	-0.76019	-1.61133e-07	-0.76019	-1.67145e-07
-0.75775	-1.19751e-06	-0.75775	-1.34258e-06	-0.75775	-1.59515e-07	-0.75775	-1.65497e-07
-0.75531	-1.18958e-06	-0.75531	-1.33495e-06	-0.75531	-1.57745e-07	-0.75531	-1.6394e-07
-0.75287	-1.18317e-06	-0.75287	-1.32641e-06	-0.75287	-1.56067e-07	-0.75287	-1.62476e-07
-0.75043	-1.17432e-06	-0.75043	-1.31878e-06	-0.75043	-1.54449e-07	-0.75043	-1.60889e-07
-0.74799	-1.16669e-06	-0.74799	-1.31115e-06	-0.74799	-1.52679e-07	-0.74799	-1.59241e-07
-0.74554	-1.15845e-06	-0.74554	-1.30566e-06	-0.74554	-1.50848e-07	-0.74554	-1.5744e-07
-0.7431	-1.1499e-06	-0.7431	-1.2968e-06	-0.7431	-1.49414e-07	-0.7431	-1.56036e-07
-0.74066	-1.14136e-06	-0.74066	-1.29009e-06	-0.74066	-1.47949e-07	-0.74066	-1.54114e-07
-0.73822	-1.13312e-06	-0.73822	-1.28185e-06	-0.73822	-1.46149e-07	-0.73822	-1.52832e-07
-0.73578	-1.12549e-06	-0.73578	-1.27422e-06	-0.73578	-1.44562e-07	-0.73578	-1.51093e-07
-0.73334	-1.11786e-06	-0.73334	-1.2669e-06	-0.73334	-1.427e-07	-0.73334	-1.49933e-07
-0.7309	-1.10992e-06	-0.7309	-1.25896e-06	-0.7309	-1.40564e-07	-0.7309	-1.49048e-07
-0.72845	-1.10199e-06	-0.72845	-1.25133e-06	-0.72845	-1.39008e-07	-0.72845	-1.47675e-07
-0.72601	-1.09497e-06	-0.72601	-1.24187e-06	-0.72601	-1.37726e-07	-0.72601	-1.46515e-07
-0.72357	-1.08765e-06	-0.72357	-1.2373e-06	-0.72357	-1.36383e-07	-0.72357	-1.46149e-07
-0.72113	-1.08063e-06	-0.72113	-1.22967e-06	-0.72113	-1.3504e-07	-0.72113	-1.44531e-07
-0.71869	-1.07361e-06	-0.71869	-1.22082e-06	-0.71869	-1.33881e-07	-0.71869	-1.4386e-07
-0.71625	-1.06659e-06	-0.71625	-1.21471e-06	-0.71625	-1.32355e-07	-0.71625	-1.42883e-07
-0.71381	-1.05652e-06	-0.71381	-1.2083e-06	-0.71381	-1.3092e-07	-0.71381	-1.41418e-07
-0.71136	-1.0495e-06	-0.71136	-1.19915e-06	-0.71136	-1.29364e-07	-0.71136	-1.4035e-07
-0.70892	-1.04126e-06	-0.70892	-1.19182e-06	-0.70892	-1.28387e-07	-0.70892	-1.38916e-07
-0.70648	-1.03333e-06	-0.70648	-1.18267e-06	-0.70648	-1.2677e-07	-0.70648	-1.3678e-07
-0.70404	-1.02509e-06	-0.70404	-1.17504e-06	-0.70404	-1.25305e-07	-0.70404	-1.34735e-07
-0.7016	-1.01776e-06	-0.7016	-1.16772e-06	-0.7016	-1.23627e-07	-0.7016	-1.33209e-07
-0.69916	-1.00922e-06	-0.69916	-1.16192e-06	-0.69916	-1.22437e-07	-0.69916	-1.31592e-07
-0.69672	-1.00006e-06	-0.69672	-1.1549e-06	-0.69672	-1.21094e-07	-0.69672	-1.29944e-07
-0.69427	-9.93652e-07	-0.69427	-1.14757e-06	-0.69427	-1.19965e-07	-0.69427	-1.28967e-07
-0.69183	-9.85718e-07	-0.69183	-1.14025e-06	-0.69183	-1.18622e-07	-0.69183	-1.28052e-07
-0.68939	-9.80225e-07	-0.68939	-1.1317e-06	-0.68939	-1.17493e-07	-0.68939	-1.26862e-07
-0.68695	-9.72595e-07	-0.68695	-1.12469e-06	-0.68695	-1.16272e-07	-0.68695	-1.25977e-07
-0.68451	-9.65271e-07	-0.68451	-1.11767e-06	-0.68451	-1.14929e-07	-0.68451	-1.25641e-07
-0.68207	-9.58252e-07	-0.68207	-1.11095e-06	-0.68207	-1.13831e-07	-0.68207	-1.24451e-07
-0.67963	-9.50317e-07	-0.67963	-1.10515e-06	-0.67963	-1.12701e-07	-0.67963	-1.23505e-07
-0.67719	-9.44824e-07	-0.67719	-1.09814e-06	-0.67719	-1.11755e-07	-0.67719	-1.22467e-07
-0.67474	-9.38721e-07	-0.67474	-1.09112e-06	-0.67474	-1.1084e-07	-0.67474	-1.21918e-07
-0.6723	-9.2865e-07	-0.6723	-1.08288e-06	-0.6723	-1.09772e-07	-0.6723	-1.20789e-07
-0.66986	-9.22546e-07	-0.66986	-1.07647e-06	-0.66986	-1.0907e-07	-0.66986	-1.19446e-07
-0.66742	-9.15222e-07	-0.66742	-1.07006e-06	-0.66742	-1.07544e-07	-0.66742	-1.18073e-07
-0.66498	-9.06372e-07	-0.66498	-1.06426e-06	-0.66498	-1.06659e-07	-0.66498	-1.17218e-07
-0.66254	-8.99048e-07	-0.66254	-1.05572e-06	-0.66254	-1.05408e-07	-0.66254	-1.15753e-07
-0.6601	-8.92944e-07	-0.6601	-1.05083e-06	-0.6601	-1.04401e-07	-0.6601	-1.14594e-07
-0.65765	-8.86536e-07	-0.65765	-1.04381e-06	-0.65765	-1.03241e-07	-0.65765	-1.13342e-07
-0.65521	-8.81653e-07	-0.65521	-1.0371e-06	-0.65521	-1.02112e-07	-0.65521	-1.12457e-07
-0.65277	-8.74329e-07	-0.65277	-1.02947e-06	-0.65277	-1.01196e-07	-0.65277	-1.11359e-07
-0.65033	-8.68225e-07	-0.65033	-1.02306e-06	-0.65033	-1.00433e-07	-0.65033	-1.10779e-07
-0.64789	-8.60596e-07	-0.64789	-1.01482e-06	-0.64789	-9.96399e-08	-0.64789	-1.0968e-07
-0.64545	-8.51746e-07	-0.64545	-1.00872e-06	-0.64545	-9.88159e-08	-0.64545	-1.091e-07
-0.64301	-8.45032e-07	-0.64301	-1.0017e-06	-0.64301	-9.78699e-08	-0.64301	-1.08093e-07
-0.64056	-8.37097e-07	-0.64056	-9.97122e-07	-0.64056	-9.68018e-08	-0.64056	-1.0733e-07
-0.63812	-8.30383e-07	-0.63812	-9.89798e-07	-0.63812	-9.59473e-08	-0.63812	-1.06415e-07
-0.63568	-8.25195e-07	-0.63568	-9.82474e-07	-0.63568	-9.48486e-08	-0.63568	-1.05133e-07
-0.63324	-8.17566e-07	-0.63324	-9.74845e-07	-0.63324	-9.39636e-08	-0.63324	-1.04279e-07
-0.6308	-8.11157e-07	-0.6308	-9.68741e-07	-0.6308	-9.29565e-08	-0.6308	-1.03607e-07
-0.62836	-8.02002e-07	-0.62836	-9.61722e-07	-0.62836	-9.18274e-08	-0.62836	-1.02661e-07
-0.62592	-7.97424e-07	-0.62592	-9.55008e-07	-0.62592	-9.10034e-08	-0.62592	-1.01868e-07
-0.62347	-7.9071e-07	-0.62347	-9.48599e-07	-0.62347	-9.00269e-08	-0.62347	-1.01288e-07
-0.62103	-7.83691e-07	-0.62103	-9.41275e-07	-0.62103	-8.92029e-08	-0.62103	-1.00586e-07
-0.61859	-7.76978e-07	-0.61859	-9.35477e-07	-0.61859	-8.83789e-08	-0.61859	-9.97925e-08
-0.61615	-7.70264e-07	-0.61615	-9.27847e-07	-0.61615	-8.75549e-08	-0.61615	-9.92432e-08
-0.61371	-7.6355e-07	-0.61371	-9.20523e-07	-0.61371	-8.64868e-08	-0.61371	-9.85107e-08
-0.61127	-7.57446e-07	-0.61127	-9.15335e-07	-0.61127	-8.56628e-08	-0.61127	-9.77173e-08
-0.60883	-7.49817e-07	-0.60883	-9.07706e-07	-0.60883	-8.47778e-08	-0.60883	-9.67712e-08
-0.60638	-7.43103e-07	-0.60638	-9.01297e-07	-0.60638	-8.40454e-08	-0.60638	-9.61304e-08
-0.60394	-7.36389e-07	-0.60394	-8.93363e-07	-0.60394	-8.3313e-08	-0.60394	-9.51233e-08
-0.6015	-7.30896e-07	-0.6015	-8.87259e-07	-0.6015	-8.25806e-08	-0.6015	-9.42688e-08
-0.59906	-7.22961e-07	-0.59906	-8.80545e-07	-0.59906	-8.13904e-08	-0.59906	-9.33228e-08
-0.59662	-7.17773e-07	-0.59662	-8.73831e-07	-0.59662	-8.05664e-08	-0.59662	-9.24377e-08
-0.59418	-7.09534e-07	-0.59418	-8.67728e-07	-0.59418	-7.98035e-08	-0.59418	-9.19189e-08
-0.59174	-7.02515e-07	-0.59174	-8.59488e-07	-0.59174	-7.90405e-08	-0.59174	-9.12476e-08
-0.58929	-6.9519e-07	-0.58929	-8.5369e-07	-0.58929	-7.80945e-08	-0.58929	-9.04541e-08
-0.58685	-6.90918e-07	-0.58685	-8.47586e-07	-0.58685	-7.7301e-08	-0.58685	-8.99048e-08
-0.58441	-6.82983e-07	-0.58441	-8.42703e-07	-0.58441	-7.64771e-08	-0.58441	-8.90503e-08
-0.58197	-6.76575e-07	-0.58197	-8.36295e-07	-0.58197	-7.5592e-08	-0.58197	-8.80737e-08
-0.57953	-6.69556e-07	-0.57953	-8.29276e-07	-0.57953	-7.4646e-08	-0.57953	-8.77075e-08
-0.57709	-6.64673e-07	-0.57709	-8.23172e-07	-0.57709	-7.39746e-08	-0.57709	-8.70667e-08
-0.57465	-6.57959e-07	-0.57465	-8.15848e-07	-0.57465	-7.32422e-08	-0.57465	-8.64563e-08
-0.5722	-6.5094e-07	-0.5722	-8.09744e-07	-0.5722	-7.24792e-08	-0.5722	-8.57544e-08
-0.56976	-6.43005e-07	-0.56976	-8.03946e-07	-0.56976	-7.17468e-08	-0.56976	-8.50525e-08
-0.56732	-6.37207e-07	-0.56732	-7.97537e-07	-0.56732	-7.11365e-08	-0.56732	-8.44116e-08
-0.56488	-6.30493e-07	-0.56488	-7.90213e-07	-0.56488	-7.05566e-08	-0.56488	-8.37097e-08
-0.56244	-6.23779e-07	-0.56244	-7.8472e-07	-0.56244	-6.98547e-08	-0.56244	-8.28857e-08
-0.56	-6.17065e-07	-0.56	-7.79532e-07	-0.56	-6.91833e-08	-0.56	-8.21228e-08
-0.55756	-6.10962e-07	-0.55756	-7.72513e-07	-0.55756	-6.84204e-08	-0.55756	-8.11768e-08
-0.55511	-6.02722e-07	-0.55511	-7.65799e-07	-0.55511	-6.75659e-08	-0.55511	-8.06274e-08
-0.55267	-5.9845e-07	-0.55267	-7.58475e-07	-0.55267	-6.67419e-08	-0.55267	-7.94678e-08
-0.55023	-5.896e-07	-0.55023	-7.51456e-07	-0.55023	-6.604e-08	-0.55023	-7.86133e-08
-0.54779	-5.84717e-07	-0.54779	-7.45658e-07	-0.54779	-6.52771e-08	-0.54779	-7.78503e-08
-0.54535	-5.78003e-07	-0.54535	-7.40164e-07	-0.54535	-6.46057e-08	-0.54535	-7.72095e-08
-0.54291	-5.71289e-07	-0.54291	-7.3284e-07	-0.54291	-6.38733e-08	-0.54291	-7.66907e-08
-0.54047	-5.63965e-07	-0.54047	-7.25821e-07	-0.54047	-6.32019e-08	-0.54047	-7.58667e-08
-0.53802	-5.56641e-07	-0.53802	-7.19107e-07	-0.53802	-6.27136e-08	-0.53802	-7.52869e-08
-0.53558	-5.51147e-07	-0.53558	-7.11478e-07	-0.53558	-6.20728e-08	-0.53558	-7.44019e-08
-0.53314	-5.42297e-07	-0.53314	-7.07511e-07	-0.53314	-6.14014e-08	-0.53314	-7.37915e-08
-0.5307	-5.36194e-07	-0.5307	-6.99271e-07	-0.5307	-6.073e-08	-0.5307	-7.25708e-08
-0.52826	-5.30701e-07	-0.52826	-6.93167e-07	-0.52826	-5.9845e-08	-0.52826	-7.1991e-08
-0.52582	-5.24597e-07	-0.52582	-6.86453e-07	-0.52582	-5.91431e-08	-0.52582	-7.1106e-08
-0.52338	-5.17883e-07	-0.52338	-6.81265e-07	-0.52338	-5.85632e-08	-0.52338	-7.04956e-08
-0.52094	-5.10864e-07	-0.52094	-6.73941e-07	-0.52094	-5.8075e-08	-0.52094	-6.97327e-08
-0.51849	-5.05371e-07	-0.51849	-6.67227e-07	-0.51849	-5.7312e-08	-0.51849	-6.88477e-08
-0.51605	-4.98047e-07	-0.51605	-6.61124e-07	-0.51605	-5.64575e-08	-0.51605	-6.81763e-08
-0.51361	-4.91333e-07	-0.51361	-6.5502e-07	-0.51361	-5.58167e-08	-0.51361	-6.76575e-08
-0.51117	-4.86145e-07	-0.51117	-6.48001e-07	-0.51117	-5.53894e-08	-0.51117	-6.69556e-08
-0.50873	-4.77905e-07	-0.50873	-6.41898e-07	-0.50873	-5.4657e-08	-0.50873	-6.64368e-08
-0.50629	-4.73022e-07	-0.50629	-6.33658e-07	-0.50629	-5.39551e-08	-0.50629	-6.58264e-08
-0.50385	-4.66248e-07	-0.50385	-6.27768e-07	-0.50385	-5.31311e-08	-0.50385	-6.52161e-08
-0.5014	-4.58252e-07	-0.5014	-6.20078e-07	-0.5014	-5.25208e-08	-0.5014	-6.46057e-08
-0.49896	-4.51263e-07	-0.49896	-6.13669e-07	-0.49896	-5.2002e-08	-0.49896	-6.36902e-08
-0.49652	-4.44092e-07	-0.49652	-6.07443e-07	-0.49652	-5.13e-08	-0.49652	-6.35986e-08
-0.49408	-4.37836e-07	-0.49408	-6.01248e-07	-0.49408	-5.05981e-08	-0.49408	-6.28967e-08
-0.49164	-4.30786e-07	-0.49164	-5.93955e-07	-0.49164	-5.00488e-08	-0.49164	-6.2561e-08
-0.4892	-4.24347e-07	-0.4892	-5.89255e-07	-0.4892	-4.92859e-08	-0.4892	-6.17371e-08
-0.48676	-4.18854e-07	-0.48676	-5.8132e-07	-0.48676	-4.88892e-08	-0.48676	-6.11267e-08
-0.48431	-4.12811e-07	-0.48431	-5.7424e-07	-0.48431	-4.81567e-08	-0.48431	-6.04858e-08
-0.48187	-4.05365e-07	-0.48187	-5.67801e-07	-0.48187	-4.76074e-08	-0.48187	-5.98755e-08
-0.47943	-3.99017e-07	-0.47943	-5.59683e-07	-0.47943	-4.6875e-08	-0.47943	-5.9021e-08
-0.47699	-3.92151e-07	-0.47699	-5.54617e-07	-0.47699	-4.62646e-08	-0.47699	-5.84717e-08
-0.47455	-3.86505e-07	-0.47455	-5.47354e-07	-0.47455	-4.55627e-08	-0.47455	-5.79834e-08
-0.47211	-3.78906e-07	-0.47211	-5.40763e-07	-0.47211	-4.47388e-08	-0.47211	-5.7373e-08
-0.46967	-3.72437e-07	-0.46967	-5.34323e-07	-0.46967	-4.41589e-08	-0.46967	-5.69763e-08
-0.46722	-3.67432e-07	-0.46722	-5.27884e-07	-0.46722	-4.34875e-08	-0.46722	-5.63354e-08
-0.46478	-3.59253e-07	-0.46478	-5.22391e-07	-0.46478	-4.26941e-08	-0.46478	-5.56335e-08
-0.46234	-3.53149e-07	-0.46234	-5.15524e-07	-0.46234	-4.21448e-08	-0.46234	-5.53284e-08
-0.4599	-3.46222e-07	-0.4599	-5.08444e-07	-0.4599	-4.15649e-08	-0.4599	-5.4718e-08
-0.45746	-3.40302e-07	-0.45746	-5.02707e-07	-0.45746	-4.10461e-08	-0.45746	-5.39551e-08
-0.45502	-3.35663e-07	-0.45502	-4.96726e-07	-0.45502	-4.05884e-08	-0.45502	-5.32227e-08
-0.45258	-3.29132e-07	-0.45258	-4.89829e-07	-0.45258	-3.9917e-08	-0.45258	-5.23682e-08
-0.45013	-3.21686e-07	-0.45013	-4.82535e-07	-0.45013	-3.92761e-08	-0.45013	-5.16357e-08
-0.44769	-3.15399e-07	-0.44769	-4.75699e-07	-0.44769	-3.88184e-08	-0.44769	-5.09949e-08
-0.44525	-3.08838e-07	-0.44525	-4.69138e-07	-0.44525	-3.8147e-08	-0.44525	-5.02014e-08
-0.44281	-3.01697e-07	-0.44281	-4.62729e-07	-0.44281	-3.72925e-08	-0.44281	-4.98657e-08
-0.44037	-2.95654e-07	-0.44037	-4.57114e-07	-0.44037	-3.66821e-08	-0.44037	-4.92249e-08
-0.43793	-2.87842e-07	-0.43793	-4.5098e-07	-0.43793	-3.60718e-08	-0.43793	-4.8645e-08
-0.43549	-2.83295e-07	-0.43549	-4.457e-07	-0.43549	-3.53088e-08	-0.43549	-4.80347e-08
-0.43304	-2.76306e-07	-0.43304	-4.3743e-07	-0.43304	-3.45459e-08	-0.43304	-4.75464e-08
-0.4306	-2.6947e-07	-0.4306	-4.31906e-07	-0.4306	-3.3905e-08	-0.4306	-4.66919e-08
-0.42816	-2.6355e-07	-0.42816	-4.24765e-07	-0.42816	-3.32336e-08	-0.42816	-4.62341e-08
-0.42572	-2.56836e-07	-0.42572	-4.19242e-07	-0.42572	-3.26233e-08	-0.42572	-4.55627e-08
-0.42328	-2.50122e-07	-0.42328	-4.13779e-07	-0.42328	-3.2074e-08	-0.42328	-4.51355e-08
-0.42084	-2.44385e-07	-0.42084	-4.07767e-07	-0.42084	-3.15247e-08	-0.42084	-4.45557e-08
-0.4184	-2.38708e-07	-0.4184	-4.00961e-07	-0.4184	-3.08533e-08	-0.4184	-4.37317e-08
-0.41595	-2.32391e-07	-0.41595	-3.95743e-07	-0.41595	-3.05481e-08	-0.41595	-4.31824e-08
-0.41351	-2.25861e-07	-0.41351	-3.879e-07	-0.41351	-2.99072e-08	-0.41351	-4.25415e-08
-0.41107	-2.20642e-07	-0.41107	-3.82987e-07	-0.41107	-2.93884e-08	-0.41107	-4.18701e-08
-0.40863	-2.13654e-07	-0.40863	-3.78165e-07	-0.40863	-2.85339e-08	-0.40863	-4.10767e-08
-0.40619	-2.0871e-07	-0.40619	-3.71817e-07	-0.40619	-2.78931e-08	-0.40619	-4.01917e-08
-0.40375	-2.02423e-07	-0.40375	-3.66355e-07	-0.40375	-2.73438e-08	-0.40375	-3.95508e-08
-0.40131	-1.9873e-07	-0.40131	-3.61197e-07	-0.40131	-2.66418e-08	-0.40131	-3.87268e-08
-0.39886	-1.91315e-07	-0.39886	-3.53873e-07	-0.39886	-2.6001e-08	-0.39886	-3.8208e-08
-0.39642	-1.86554e-07	-0.39642	-3.48441e-07	-0.39642	-2.55737e-08	-0.39642	-3.7384e-08
-0.39398	-1.79932e-07	-0.39398	-3.41269e-07	-0.39398	-2.49908e-08	-0.39398	-3.66211e-08
-0.39154	-1.75507e-07	-0.39154	-3.36173e-07	-0.39154	-2.43683e-08	-0.39154	-3.60107e-08
-0.3891	-1.68762e-07	-0.3891	-3.31442e-07	-0.3891	-2.37946e-08	-0.3891	-3.51257e-08
-0.38666	-1.64032e-07	-0.38666	-3.26377e-07	-0.38666	-2.31934e-08	-0.38666	-3.44543e-08
-0.38422	-1.57959e-07	-0.38422	-3.19266e-07	-0.38422	-2.25952e-08	-0.38422	-3.38135e-08
-0.38177	-1.52405e-07	-0.38177	-3.14627e-07	-0.38177	-2.20337e-08	-0.38177	-3.30811e-08
-0.37933	-1.47125e-07	-0.37933	-3.09073e-07	-0.37933	-2.14294e-08	-0.37933	-3.23792e-08
-0.37689	-1.42456e-07	-0.37689	-3.05319e-07	-0.37689	-2.09808e-08	-0.37689	-3.16772e-08
-0.37445	-1.36566e-07	-0.37445	-2.99185e-07	-0.37445	-2.02576e-08	-0.37445	-3.08228e-08
-0.37201	-1.32568e-07	-0.37201	-2.94943e-07	-0.37201	-1.95404e-08	-0.37201	-2.99683e-08
-0.36957	-1.24359e-07	-0.36957	-2.88169e-07	-0.36957	-1.88019e-08	-0.36957	-2.93884e-08
-0.36713	-1.21521e-07	-0.36713	-2.83408e-07	-0.36713	-1.82159e-08	-0.36713	-2.8717e-08
-0.36469	-1.15601e-07	-0.36469	-2.79593e-07	-0.36469	-1.75995e-08	-0.36469	-2.78931e-08
-0.36224	-1.11023e-07	-0.36224	-2.7294e-07	-0.36224	-1.69189e-08	-0.36224	-2.72522e-08
-0.3598	-1.06598e-07	-0.3598	-2.67783e-07	-0.3598	-1.62659e-08	-0.3598	-2.63977e-08
-0.35736	-1.0257e-07	-0.35736	-2.6293e-07	-0.35736	-1.55304e-08	-0.35736	-2.57568e-08
-0.35492	-9.73816e-08	-0.35492	-2.58597e-07	-0.35492	-1.47247e-08	-0.35492	-2.52197e-08
-0.35248	-9.15833e-08	-0.35248	-2.54935e-07	-0.35248	-1.42151e-08	-0.35248	-2.453e-08
-0.35004	-8.79822e-08	-0.35004	-2.49228e-07	-0.35004	-1.34491e-08	-0.35004	-2.38129e-08
-0.3476	-8.39539e-08	-0.3476	-2.45078e-07	-0.3476	-1.28387e-08	-0.3476	-2.31262e-08
-0.34515	-7.8949e-08	-0.34515	-2.40103e-07	-0.34515	-1.21338e-08	-0.34515	-2.24396e-08
-0.34271	-7.4646e-08	-0.34271	-2.36502e-07	-0.34271	-1.16364e-08	-0.34271	-2.20215e-08
-0.34027	-7.04041e-08	-0.34027	-2.31192e-07	-0.34027	-1.09619e-08	-0.34027	-2.12585e-08
-0.33783	-6.66809e-08	-0.33783	-2.28476e-07	-0.33783	-1.03943e-08	-0.33783	-2.02301e-08
-0.33539	-6.28052e-08	-0.33539	-2.23319e-07	-0.33539	-9.57642e-09	-0.33539	-1.93848e-08
-0.33295	-5.82886e-08	-0.33295	-2.20114e-07	-0.33295	-8.95081e-09	-0.33295	-1.86462e-08
-0.33051	-5.3833e-08	-0.33051	-2.14102e-07	-0.33051	-8.27942e-09	-0.33051	-1.79504e-08
-0.32806	-4.97131e-08	-0.32806	-2.11722e-07	-0.32806	-7.41882e-09	-0.32806	-1.71021e-08
-0.32562	-4.44641e-08	-0.32562	-2.0745e-07	-0.32562	-6.65588e-09	-0.32562	-1.63025e-08
-0.32318	-4.23584e-08	-0.32318	-2.0333e-07	-0.32318	-6.06384e-09	-0.32318	-1.56067e-08
-0.32074	-3.79639e-08	-0.32074	-2.00339e-07	-0.32074	-5.18799e-09	-0.32074	-1.50116e-08
-0.3183	-3.3844e-08	-0.3183	-1.93808e-07	-0.3183	-4.44641e-09	-0.3183	-1.43951e-08
-0.31586	-3.03955e-08	-0.31586	-1.90238e-07	-0.31586	-3.50342e-09	-0.31586	-1.38794e-08
-0.31342	-2.63367e-08	-0.31342	-1.87461e-07	-0.31342	-2.78625e-09	-0.31342	-1.29272e-08
-0.31097	-2.2522e-08	-0.31097	-1.8392e-07	-0.31097	-2.11792e-09	-0.31097	-1.23505e-08
-0.30853	-1.95618e-08	-0.30853	-1.80777e-07	-0.30853	-1.57776e-09	-0.30853	-1.15753e-08
-0.30609	-1.57166e-08	-0.30609	-1.7739e-07	-0.30609	-8.27026e-10	-0.30609	-1.08734e-08
-0.30365	-1.23291e-08	-0.30365	-1.74063e-07	-0.30365	-1.06812e-10	-0.30365	-1.00586e-08
-0.30121	-8.57544e-09	-0.30121	-1.69669e-07	-0.30121	5.21851e-10	-0.30121	-9.50928e-09
-0.29877	-6.46973e-09	-0.29877	-1.67655e-07	-0.29877	1.14746e-09	-0.29877	-8.64868e-09
-0.29633	-2.31934e-09	-0.29633	-1.63474e-07	-0.29633	2.01721e-09	-0.29633	-7.93762e-09
-0.29388	1.52588e-10	-0.29388	-1.60391e-07	-0.29388	2.49634e-09	-0.29388	-7.35779e-09
-0.29144	3.63159e-09	-0.29144	-1.56095e-07	-0.29144	3.125e-09	-0.29144	-6.71997e-09
-0.289	6.79932e-09	-0.289	-1.54013e-07	-0.289	3.51563e-09	-0.289	-6.04248e-09
-0.28656	9.64355e-09	-0.28656	-1.50992e-07	-0.28656	4.08936e-09	-0.28656	-5.35583e-09
-0.28412	1.19629e-08	-0.28412	-1.47849e-07	-0.28412	4.44336e-09	-0.28412	-4.74854e-09
-0.28168	1.54114e-08	-0.28168	-1.44583e-07	-0.28168	5.27954e-09	-0.28168	-4.00085e-09
-0.27924	1.80969e-08	-0.27924	-1.42325e-07	-0.27924	5.95398e-09	-0.27924	-3.50647e-09
-0.27679	2.14844e-08	-0.27679	-1.38999e-07	-0.27679	6.56433e-09	-0.27679	-2.77405e-09
-0.27435	2.31018e-08	-0.27435	-1.3674e-07	-0.27435	7.14111e-09	-0.27435	-1.97754e-09
-0.27191	2.55127e-08	-0.27191	-1.34909e-07	-0.27191	7.724e-09	-0.27191	-1.51062e-09
-0.26947	2.92053e-08	-0.26947	-1.3198e-07	-0.26947	8.19702e-09	-0.26947	-8.75854e-10
-0.26703	3.22876e-08	-0.26703	-1.29782e-07	-0.26703	9.2041e-09	-0.26703	-2.53296e-10
-0.26459	3.50647e-08	-0.26459	-1.25479e-07	-0.26459	9.75952e-09	-0.26459	3.17383e-10
-0.26215	3.77808e-08	-0.26215	-1.23068e-07	-0.26215	9.90906e-09	-0.26215	9.552e-10
-0.2597	4.11377e-08	-0.2597	-1.20871e-07	-0.2597	1.06598e-08	-0.2597	1.48315e-09
-0.25726	4.36096e-08	-0.25726	-1.18125e-07	-0.25726	1.13739e-08	-0.25726	2.11487e-09
-0.25482	4.58984e-08	-0.25482	-1.1669e-07	-0.25482	1.17188e-08	-0.25482	2.66113e-09
-0.25238	4.79431e-08	-0.25238	-1.13364e-07	-0.25238	1.23535e-08	-0.25238	3.24707e-09
-0.24994	5.05981e-08	-0.24994	-1.11014e-07	-0.24994	1.27289e-08	-0.24994	3.69568e-09
-0.2475	5.27954e-08	-0.2475	-1.09458e-07	-0.2475	1.33667e-08	-0.2475	4.27856e-09
-0.24506	5.62439e-08	-0.24506	-1.07901e-07	-0.24506	1.40045e-08	-0.24506	4.62952e-09
-0.24261	5.77393e-08	-0.24261	-1.04361e-07	-0.24261	1.4566e-08	-0.24261	5.24292e-09
-0.24017	5.97229e-08	-0.24017	-1.02194e-07	-0.24017	1.50452e-08	-0.24017	5.56335e-09
-0.23773	6.30493e-08	-0.23773	-1.00485e-07	-0.23773	1.55884e-08	-0.23773	6.02417e-09
-0.23529	6.61011e-08	-0.23529	-9.83797e-08	-0.23529	1.61957e-08	-0.23529	6.53992e-09
-0.23285	6.73828e-08	-0.23285	-9.61824e-08	-0.23285	1.69617e-08	-0.23285	7.12585e-09
-0.23041	6.86646e-08	-0.23041	-9.39852e-08	-0.23041	1.78284e-08	-0.23041	7.35779e-09
-0.22797	7.10144e-08	-0.22797	-9.27034e-08	-0.22797	1.84662e-08	-0.22797	7.93762e-09
-0.22552	7.23267e-08	-0.22552	-9.17879e-08	-0.22552	1.89667e-08	-0.22552	8.42896e-09
-0.22308	7.5592e-08	-0.22308	-8.87667e-08	-0.22308	1.95313e-08	-0.22308	8.83789e-09
-0.22064	7.69043e-08	-0.22064	-8.82784e-08	-0.22064	2.02057e-08	-0.22064	9.57947e-09
-0.2182	7.91931e-08	-0.2182	-8.69661e-08	-0.2182	2.08832e-08	-0.2182	1.00372e-08
-0.21576	8.09326e-08	-0.21576	-8.30293e-08	-0.21576	2.14661e-08	-0.21576	1.0376e-08
-0.21332	8.38318e-08	-0.21332	-8.21138e-08	-0.21332	2.2168e-08	-0.21332	1.10168e-08
-0.21088	8.41675e-08	-0.21088	-8.10762e-08	-0.21088	2.24609e-08	-0.21088	1.13922e-08
-0.20844	8.69446e-08	-0.20844	-7.89705e-08	-0.20844	2.28668e-08	-0.20844	1.18622e-08
-0.20599	8.90198e-08	-0.20599	-7.67122e-08	-0.20599	2.35901e-08	-0.20599	1.2088e-08
-0.20355	9.09424e-08	-0.20355	-7.47896e-08	-0.20355	2.39258e-08	-0.20355	1.25183e-08
-0.20111	9.26208e-08	-0.20111	-7.25618e-08	-0.20111	2.41882e-08	-0.20111	1.27686e-08
-0.19867	9.41467e-08	-0.19867	-7.1921e-08	-0.19867	2.4292e-08	-0.19867	1.34491e-08
-0.19623	9.52148e-08	-0.19623	-6.97847e-08	-0.19623	2.48108e-08	-0.19623	1.37482e-08
-0.19379	9.69238e-08	-0.19379	-6.86251e-08	-0.19379	2.52686e-08	-0.19379	1.43433e-08
-0.19135	9.82361e-08	-0.19135	-6.73433e-08	-0.19135	2.59094e-08	-0.19135	1.47858e-08
-0.1889	1.00342e-07	-0.1889	-6.70381e-08	-0.1889	2.65808e-08	-0.1889	1.50665e-08
-0.18646	1.02478e-07	-0.18646	-6.5146e-08	-0.18646	2.70081e-08	-0.18646	1.52802e-08
-0.18402	1.03088e-07	-0.18402	-6.28877e-08	-0.18402	2.73743e-08	-0.18402	1.56281e-08
-0.18158	1.04523e-07	-0.18158	-6.26436e-08	-0.18158	2.80151e-08	-0.18158	1.58173e-08
-0.17914	1.05957e-07	-0.17914	-6.00496e-08	-0.17914	2.85034e-08	-0.17914	1.67053e-08
-0.1767	1.06689e-07	-0.1767	-5.82491e-08	-0.1767	2.87781e-08	-0.1767	1.71478e-08
-0.17426	1.08276e-07	-0.17426	-5.6418e-08	-0.17426	2.92664e-08	-0.17426	1.72485e-08
-0.17181	1.08704e-07	-0.17181	-5.52584e-08	-0.17181	2.99072e-08	-0.17181	1.73187e-08
-0.16937	1.10901e-07	-0.16937	-5.48616e-08	-0.16937	3.01514e-08	-0.16937	1.78253e-08
-0.16693	1.1261e-07	-0.16693	-5.25728e-08	-0.16693	3.04565e-08	-0.16693	1.82129e-08
-0.16449	1.14349e-07	-0.16449	-5.11995e-08	-0.16449	3.08533e-08	-0.16449	1.85242e-08
-0.16205	1.1673e-07	-0.16205	-4.92159e-08	-0.16205	3.10059e-08	-0.16205	1.89148e-08
-0.15961	1.18042e-07	-0.15961	-4.90938e-08	-0.15961	3.14331e-08	-0.15961	1.98639e-08
-0.15717	1.19019e-07	-0.15717	-4.96126e-08	-0.15717	3.14941e-08	-0.15717	2.03918e-08
-0.15472	1.20422e-07	-0.15472	-4.72933e-08	-0.15472	3.21655e-08	-0.15472	2.07825e-08
-0.15228	1.20605e-07	-0.15228	-4.53401e-08	-0.15228	3.25928e-08	-0.15228	2.1106e-08
-0.14984	1.23108e-07	-0.14984	-4.37227e-08	-0.14984	3.27454e-08	-0.14984	2.18231e-08
-0.1474	1.23566e-07	-0.1474	-4.17391e-08	-0.1474	3.32642e-08	-0.1474	2.23297e-08
-0.14496	1.2561e-07	-0.14496	-3.99385e-08	-0.14496	3.3783e-08	-0.14496	2.23877e-08
-0.14252	1.27045e-07	-0.14252	-3.82295e-08	-0.14252	3.39966e-08	-0.14252	2.24121e-08
-0.14008	1.27655e-07	-0.14008	-3.74666e-08	-0.14008	3.46985e-08	-0.14008	2.26746e-08
-0.13763	1.28723e-07	-0.13763	-3.66121e-08	-0.13763	3.51563e-08	-0.13763	2.29156e-08
-0.13519	1.30707e-07	-0.13519	-3.62154e-08	-0.13519	3.56445e-08	-0.13519	2.33978e-08
-0.13275	1.31134e-07	-0.13275	-3.41402e-08	-0.13275	3.61328e-08	-0.13275	2.36938e-08
-0.13031	1.32019e-07	-0.13031	-3.25533e-08	-0.13031	3.60107e-08	-0.13031	2.40784e-08
-0.12787	1.34277e-07	-0.12787	-3.15462e-08	-0.12787	3.64075e-08	-0.12787	2.46185e-08
-0.12543	1.35864e-07	-0.12543	-3.02645e-08	-0.12543	3.68652e-08	-0.12543	2.48779e-08
-0.12299	1.36871e-07	-0.12299	-2.97151e-08	-0.12299	3.73535e-08	-0.12299	2.52594e-08
-0.12054	1.37878e-07	-0.12054	-2.79146e-08	-0.12054	3.78418e-08	-0.12054	2.57843e-08
-0.1181	1.38397e-07	-0.1181	-2.71211e-08	-0.1181	3.81165e-08	-0.1181	2.60315e-08
-0.11566	1.4032e-07	-0.11566	-2.46797e-08	-0.11566	3.81775e-08	-0.11566	2.66113e-08
-0.11322	1.42059e-07	-0.11322	-2.25435e-08	-0.11322	3.85132e-08	-0.11322	2.67639e-08
-0.11078	1.43982e-07	-0.11078	-2.18416e-08	-0.11078	3.90015e-08	-0.11078	2.71606e-08
-0.10834	1.43219e-07	-0.10834	-2.12923e-08	-0.10834	3.94897e-08	-0.10834	2.78259e-08
-0.1059	1.45477e-07	-0.1059	-2.10481e-08	-0.1059	3.97339e-08	-0.1059	2.82501e-08
-0.10345	1.46271e-07	-0.10345	-2.07735e-08	-0.10345	4.03748e-08	-0.10345	2.86255e-08
-0.10101	1.48651e-07	-0.10101	-1.97664e-08	-0.10101	4.06494e-08	-0.10101	2.89001e-08
-0.09857	1.47888e-07	-0.09857	-1.92476e-08	-0.09857	4.12292e-08	-0.09857	2.90527e-08
-0.09613	1.4859e-07	-0.09613	-1.75386e-08	-0.09613	4.17175e-08	-0.09613	2.96631e-08
-0.09369	1.49963e-07	-0.09369	-1.76912e-08	-0.09369	4.23279e-08	-0.09369	2.98462e-08
-0.09125	1.50848e-07	-0.09125	-1.7386e-08	-0.09125	4.23889e-08	-0.09125	3.0304e-08
-0.08881	1.52679e-07	-0.08881	-1.59212e-08	-0.08881	4.27551e-08	-0.08881	3.09143e-08
-0.08636	1.54083e-07	-0.08636	-1.38155e-08	-0.08636	4.28467e-08	-0.08636	3.13721e-08
-0.08392	1.54114e-07	-0.08392	-1.42427e-08	-0.08392	4.30603e-08	-0.08392	3.17993e-08
-0.08148	1.54999e-07	-0.08148	-1.25032e-08	-0.08148	4.36707e-08	-0.08148	3.19519e-08
-0.07904	1.56189e-07	-0.07904	-1.18624e-08	-0.07904	4.41284e-08	-0.07904	3.2074e-08
-0.0766	1.57593e-07	-0.0766	-1.00313e-08	-0.0766	4.44946e-08	-0.0766	3.23486e-08
-0.07416	1.59668e-07	-0.07416	-9.39043e-09	-0.07416	4.47998e-08	-0.07416	3.25928e-08
-0.07172	1.60187e-07	-0.07172	-7.89507e-09	-0.07172	4.53491e-08	-0.07172	3.28979e-08
-0.06927	1.6275e-07	-0.06927	-7.04058e-09	-0.06927	4.57764e-08	-0.06927	3.29285e-08
-0.06683	1.62628e-07	-0.06683	-5.63677e-09	-0.06683	4.63562e-08	-0.06683	3.31726e-08
-0.06439	1.61713e-07	-0.06439	-3.53106e-09	-0.06439	4.65088e-08	-0.06439	3.31116e-08
-0.06195	1.63483e-07	-0.06195	-1.79156e-09	-0.06195	4.6875e-08	-0.06195	3.34167e-08
-0.05951	1.64276e-07	-0.05951	-2.96195e-10	-0.05951	4.72717e-08	-0.05951	3.33252e-08
-0.05707	1.65771e-07	-0.05707	-3.87748e-10	-0.05707	4.7699e-08	-0.05707	3.36304e-08
-0.05463	1.65741e-07	-0.05463	1.53486e-09	-0.05463	4.80347e-08	-0.05463	3.3905e-08
-0.05219	1.66443e-07	-0.05219	2.54194e-09	-0.05219	4.84619e-08	-0.05219	3.41797e-08
-0.04974	1.69006e-07	-0.04974	3.97627e-09	-0.04974	4.90417e-08	-0.04974	3.49121e-08
-0.0473	1.71417e-07	-0.0473	5.53266e-09	-0.0473	4.96216e-08	-0.0473	3.50342e-08
-0.04486	1.70319e-07	-0.04486	5.0749e-09	-0.04486	5.00793e-08	-0.04486	3.61328e-08
-0.04242	1.70746e-07	-0.04242	7.39423e-09	-0.04242	5.04761e-08	-0.04242	3.67432e-08
-0.03998	1.70563e-07	-0.03998	8.0351e-09	-0.03998	5.07202e-08	-0.03998	3.7262e-08
-0.03754	1.70837e-07	-0.03754	8.40131e-09	-0.03754	5.13306e-08	-0.03754	3.78113e-08
-0.0351	1.72089e-07	-0.0351	1.0385e-08	-0.0351	5.18188e-08	-0.0351	3.8269e-08
-0.03265	1.74164e-07	-0.03265	1.15446e-08	-0.03265	5.19104e-08	-0.03265	3.86658e-08
-0.03021	1.7514e-07	-0.03021	1.2216e-08	-0.03021	5.27039e-08	-0.03021	3.92151e-08
-0.02777	1.76239e-07	-0.02777	1.34672e-08	-0.02777	5.31311e-08	-0.02777	3.91846e-08
-0.02533	1.75354e-07	-0.02533	1.55424e-08	-0.02533	5.35583e-08	-0.02533	3.97949e-08
-0.02289	1.78558e-07	-0.02289	1.72819e-08	-0.02289	5.40466e-08	-0.02289	4.01306e-08
-0.02045	1.7923e-07	-0.02045	1.7343e-08	-0.02045	5.42908e-08	-0.02045	4.04053e-08
-0.01801	1.80328e-07	-0.01801	1.71599e-08	-0.01801	5.47485e-08	-0.01801	4.07104e-08
-0.01556	1.81732e-07	-0.01556	1.85942e-08	-0.01556	5.48401e-08	-0.01556	4.09546e-08
-0.01312	1.82709e-07	-0.01312	1.90214e-08	-0.01312	5.53284e-08	-0.01312	4.15039e-08
-0.01068	1.84296e-07	-0.01068	2.15544e-08	-0.01068	5.5603e-08	-0.01068	4.18701e-08
-0.00824	1.85333e-07	-0.00824	2.26225e-08	-0.00824	5.60913e-08	-0.00824	4.21143e-08
-0.0058	1.85852e-07	-0.0058	2.34465e-08	-0.0058	5.63354e-08	-0.0058	4.22058e-08
-0.00336	1.88751e-07	-0.00336	2.45146e-08	-0.00336	5.67932e-08	-0.00336	4.24194e-08
-0.000915527	1.90063e-07	-0.000915527	2.29277e-08	-0.000915527	5.69458e-08	-0.000915527	4.28772e-08
0.00153	1.93176e-07	0.00153	2.52165e-08	0.00153	5.78918e-08	0.00153	4.32739e-08
0.00397	1.93085e-07	0.00397	2.52165e-08	0.00397	5.79834e-08	0.00397	4.37622e-08
0.00641	1.96472e-07	0.00641	2.4423e-08	0.00641	5.82886e-08	0.00641	4.41284e-08
0.00885	1.97418e-07	0.00885	2.66813e-08	0.00885	5.85022e-08	0.00885	4.48303e-08
0.01129	1.98364e-07	0.01129	2.67424e-08	0.01129	5.92651e-08	0.01129	4.52881e-08
0.01373	1.99402e-07	0.01373	2.85734e-08	0.01373	5.95703e-08	0.01373	4.57458e-08
0.01617	2.00531e-07	0.01617	3.09843e-08	0.01617	6.02112e-08	0.01617	4.60205e-08
0.01862	2.00836e-07	0.01862	3.25407e-08	0.01862	6.03027e-08	0.01862	4.63562e-08
0.02106	2.02728e-07	0.02106	3.56535e-08	0.02106	6.073e-08	0.02106	4.69055e-08
0.0235	2.03918e-07	0.0235	3.86442e-08	0.0235	6.11877e-08	0.0235	4.75769e-08
0.02594	2.0462e-07	0.02594	4.00175e-08	0.02594	6.1676e-08	0.02594	4.78516e-08
0.02838	2.05719e-07	0.02838	4.10246e-08	0.02838	6.22864e-08	0.02838	4.80042e-08
0.03082	2.07123e-07	0.03082	4.27946e-08	0.03082	6.28662e-08	0.03082	4.81873e-08
0.03326	2.08466e-07	0.03326	4.56938e-08	0.03326	6.28052e-08	0.03326	4.81567e-08
0.03571	2.10022e-07	0.03571	4.67619e-08	0.03571	6.3446e-08	0.03571	4.83704e-08
0.03815	2.10419e-07	0.03815	4.70671e-08	0.03815	6.40564e-08	0.03815	4.85535e-08
0.04059	2.12006e-07	0.04059	4.96e-08	0.04059	6.48193e-08	0.04059	4.87671e-08
0.04303	2.13776e-07	0.04303	4.94169e-08	0.04303	6.54907e-08	0.04303	4.91333e-08
0.04547	2.15668e-07	0.04547	5.06071e-08	0.04547	6.63757e-08	0.04547	4.93164e-08
0.04791	2.18689e-07	0.04791	5.24382e-08	0.04791	6.6925e-08	0.04791	5.00183e-08
0.05035	2.2168e-07	0.05035	5.50627e-08	0.05035	6.78406e-08	0.05035	5.07813e-08
0.0528	2.23083e-07	0.0528	5.58561e-08	0.0528	6.83289e-08	0.0528	5.16357e-08
0.05524	2.23541e-07	0.05524	5.76262e-08	0.05524	6.88477e-08	0.05524	5.22766e-08
0.05768	2.24487e-07	0.05768	5.86027e-08	0.05768	6.90918e-08	0.05768	5.27039e-08
0.06012	2.25159e-07	0.06012	5.95793e-08	0.06012	6.93665e-08	0.06012	5.33447e-08
0.06256	2.26685e-07	0.06256	6.12272e-08	0.06256	7.02515e-08	0.06256	5.36804e-08
0.065	2.2995e-07	0.065	6.32414e-08	0.065	7.07397e-08	0.065	5.3894e-08
0.06744	2.31689e-07	0.06744	6.49809e-08	0.06744	7.14722e-08	0.06744	5.44434e-08
0.06989	2.32239e-07	0.06989	6.71477e-08	0.06989	7.23877e-08	0.06989	5.45349e-08
0.07233	2.35199e-07	0.07233	6.79716e-08	0.07233	7.27844e-08	0.07233	5.49622e-08
0.07477	2.39166e-07	0.07477	7.11455e-08	0.07477	7.34558e-08	0.07477	5.5542e-08
0.07721	2.40753e-07	0.07721	7.23356e-08	0.07721	7.3822e-08	0.07721	5.59082e-08
0.07965	2.41272e-07	0.07965	7.32817e-08	0.07965	7.4585e-08	0.07965	5.62744e-08
0.08209	2.435e-07	0.08209	7.52348e-08	0.08209	7.53174e-08	0.08209	5.6366e-08
0.08453	2.44598e-07	0.08453	7.74321e-08	0.08453	7.59277e-08	0.08453	5.63354e-08
0.08698	2.44751e-07	0.08698	7.77983e-08	0.08698	7.63245e-08	0.08698	5.61829e-08
0.08942	2.45728e-07	0.08942	8.05144e-08	0.08942	7.69348e-08	0.08942	5.68542e-08
0.09186	2.46399e-07	0.09186	8.23759e-08	0.09186	7.73621e-08	0.09186	5.68542e-08
0.0943	2.47375e-07	0.0943	8.3383e-08	0.0943	7.8064e-08	0.0943	5.74036e-08
0.09674	2.48169e-07	0.09674	8.32609e-08	0.09674	7.86133e-08	0.09674	5.82581e-08
0.09918	2.50092e-07	0.09918	8.4329e-08	0.09918	7.95898e-08	0.09918	5.90515e-08
0.10162	2.50824e-07	0.10162	8.53972e-08	0.10162	8.05664e-08	0.10162	6.00891e-08
0.10406	2.51587e-07	0.10406	8.6923e-08	0.10406	8.14209e-08	0.10406	6.13403e-08
0.10651	2.54669e-07	0.10651	8.90898e-08	0.10651	8.21838e-08	0.10651	6.23779e-08
0.10895	2.57935e-07	0.10895	8.97917e-08	0.10895	8.3313e-08	0.10895	6.33545e-08
0.11139	2.61108e-07	0.11139	9.17753e-08	0.11139	8.38623e-08	0.11139	6.43616e-08
0.11383	2.63428e-07	0.11383	9.43693e-08	0.11383	8.42285e-08	0.11383	6.48193e-08
0.11627	2.63123e-07	0.11627	9.69023e-08	0.11627	8.49915e-08	0.11627	6.53076e-08
0.11871	2.65045e-07	0.11871	9.86723e-08	0.11871	8.60901e-08	0.11871	6.604e-08
0.12115	2.67029e-07	0.12115	1.01419e-07	0.12115	8.68835e-08	0.12115	6.67725e-08
0.1236	2.69958e-07	0.1236	1.0267e-07	0.1236	8.76465e-08	0.1236	6.74744e-08
0.12604	2.70538e-07	0.12604	1.0505e-07	0.12604	8.87756e-08	0.12604	6.81152e-08
0.12848	2.72339e-07	0.12848	1.07461e-07	0.12848	8.96606e-08	0.12848	6.88782e-08
0.13092	2.74536e-07	0.13092	1.10238e-07	0.13092	9.0332e-08	0.13092	6.96106e-08
0.13336	2.76611e-07	0.13336	1.121e-07	0.13336	9.13391e-08	0.13336	7.03735e-08
0.1358	2.79205e-07	0.1358	1.15884e-07	0.1358	9.15833e-08	0.1358	7.08313e-08
0.13824	2.81921e-07	0.13824	1.18753e-07	0.13824	9.23157e-08	0.13824	7.22656e-08
0.14069	2.85614e-07	0.14069	1.20462e-07	0.14069	9.27124e-08	0.14069	7.30591e-08
0.14313	2.88727e-07	0.14313	1.23422e-07	0.14313	9.36279e-08	0.14313	7.36084e-08
0.14557	2.9184e-07	0.14557	1.25284e-07	0.14557	9.46045e-08	0.14557	7.44324e-08
0.14801	2.96722e-07	0.14801	1.27176e-07	0.14801	9.58557e-08	0.14801	7.48291e-08
0.15045	2.97607e-07	0.15045	1.29526e-07	0.15045	9.64661e-08	0.15045	7.47986e-08
0.15289	3.01697e-07	0.15289	1.32028e-07	0.15289	9.75342e-08	0.15289	7.51648e-08
0.15533	3.03345e-07	0.15533	1.34103e-07	0.15533	9.89685e-08	0.15533	7.547e-08
0.15778	3.05176e-07	0.15778	1.38132e-07	0.15778	9.96704e-08	0.15778	7.65686e-08
0.16022	3.08136e-07	0.16022	1.40481e-07	0.16022	1.01013e-07	0.16022	7.74231e-08
0.16266	3.1189e-07	0.16266	1.43258e-07	0.16266	1.01959e-07	0.16266	7.82166e-08
0.1651	3.15521e-07	0.1651	1.46554e-07	0.1651	1.03088e-07	0.1651	7.84607e-08
0.16754	3.18359e-07	0.16754	1.49698e-07	0.16754	1.04553e-07	0.16754	7.9071e-08
0.16998	3.20587e-07	0.16998	1.51407e-07	0.16998	1.05164e-07	0.16998	7.99255e-08
0.17242	3.24097e-07	0.17242	1.55588e-07	0.17242	1.06293e-07	0.17242	8.10852e-08
0.17487	3.2785e-07	0.17487	1.59158e-07	0.17487	1.07086e-07	0.17487	8.23669e-08
0.17731	3.31482e-07	0.17731	1.62576e-07	0.17731	1.08368e-07	0.17731	8.41064e-08
0.17975	3.34015e-07	0.17975	1.65567e-07	0.17975	1.09314e-07	0.17975	8.51135e-08
0.18219	3.37616e-07	0.18219	1.69198e-07	0.18219	1.10321e-07	0.18219	8.60291e-08
0.18463	3.40576e-07	0.18463	1.71579e-07	0.18463	1.11511e-07	0.18463	8.68835e-08
0.18707	3.42621e-07	0.18707	1.74661e-07	0.18707	1.12823e-07	0.18707	8.83484e-08
0.18951	3.46771e-07	0.18951	1.75882e-07	0.18951	1.13892e-07	0.18951	8.9447e-08
0.19196	3.49792e-07	0.19196	1.81436e-07	0.19196	1.14899e-07	0.19196	9.08203e-08
0.1944	3.5202e-07	0.1944	1.8342e-07	0.1944	1.15845e-07	0.1944	9.25293e-08
0.19684	3.55438e-07	0.19684	1.87234e-07	0.19684	1.16577e-07	0.19684	9.34753e-08
0.19928	3.58856e-07	0.19928	1.90225e-07	0.19928	1.18164e-07	0.19928	9.42688e-08
0.20172	3.6145e-07	0.20172	1.94711e-07	0.20172	1.1911e-07	0.20172	9.61609e-08
0.20416	3.65875e-07	0.20416	1.98373e-07	0.20416	1.20483e-07	0.20416	9.73206e-08
0.2066	3.70911e-07	0.2066	2.02646e-07	0.2066	1.21918e-07	0.2066	9.89075e-08
0.20905	3.74664e-07	0.20905	2.05514e-07	0.20905	1.22894e-07	0.20905	9.96399e-08
0.21149	3.79517e-07	0.21149	2.09146e-07	0.21149	1.24298e-07	0.21149	1.00281e-07
0.21393	3.83606e-07	0.21393	2.11374e-07	0.21393	1.2558e-07	0.21393	1.01227e-07
0.21637	3.88824e-07	0.21637	2.16104e-07	0.21637	1.27045e-07	0.21637	1.02753e-07
0.21881	3.92456e-07	0.21881	2.18759e-07	0.21881	1.28052e-07	0.21881	1.04218e-07
0.22125	3.96454e-07	0.22125	2.23367e-07	0.22125	1.29364e-07	0.22125	1.0611e-07
0.22369	4.0152e-07	0.22369	2.27395e-07	0.22369	1.31104e-07	0.22369	1.08032e-07
0.22614	4.05945e-07	0.22614	2.31851e-07	0.22614	1.32294e-07	0.22614	1.10046e-07
0.22858	4.08539e-07	0.22858	2.35696e-07	0.22858	1.33514e-07	0.22858	1.11633e-07
0.23102	4.10919e-07	0.23102	2.39847e-07	0.23102	1.3501e-07	0.23102	1.13464e-07
0.23346	4.15161e-07	0.23346	2.45035e-07	0.23346	1.36322e-07	0.23346	1.15143e-07
0.2359	4.19556e-07	0.2359	2.48941e-07	0.2359	1.37604e-07	0.2359	1.16425e-07
0.23834	4.20837e-07	0.23834	2.54251e-07	0.23834	1.38885e-07	0.23834	1.17737e-07
0.24078	4.25842e-07	0.24078	2.58188e-07	0.24078	1.39832e-07	0.24078	1.18439e-07
0.24323	4.28131e-07	0.24323	2.62582e-07	0.24323	1.41388e-07	0.24323	1.19873e-07
0.24567	4.33594e-07	0.24567	2.68075e-07	0.24567	1.42792e-07	0.24567	1.2149e-07
0.24811	4.37592e-07	0.24811	2.72989e-07	0.24811	1.4386e-07	0.24811	1.22375e-07
0.25055	4.43298e-07	0.25055	2.79001e-07	0.25055	1.45111e-07	0.25055	1.23749e-07
0.25299	4.48334e-07	0.25299	2.82907e-07	0.25299	1.46576e-07	0.25299	1.24939e-07
0.25543	4.53156e-07	0.25543	2.88553e-07	0.25543	1.48224e-07	0.25543	1.2616e-07
0.25787	4.58801e-07	0.25787	2.94015e-07	0.25787	1.49384e-07	0.25787	1.27838e-07
0.26031	4.63409e-07	0.26031	2.99783e-07	0.26031	1.50879e-07	0.26031	1.29852e-07
0.26276	4.6759e-07	0.26276	3.06161e-07	0.26276	1.52863e-07	0.26276	1.31439e-07
0.2652	4.73541e-07	0.2652	3.11349e-07	0.2652	1.54419e-07	0.2652	1.3266e-07
0.26764	4.7818e-07	0.26764	3.16507e-07	0.26764	1.56036e-07	0.26764	1.34644e-07
0.27008	4.82635e-07	0.27008	3.22519e-07	0.27008	1.57715e-07	0.27008	1.36047e-07
0.27252	4.87762e-07	0.27252	3.26211e-07	0.27252	1.59363e-07	0.27252	1.37146e-07
0.27496	4.93713e-07	0.27496	3.33536e-07	0.27496	1.61011e-07	0.27496	1.38641e-07
0.2774	4.98108e-07	0.2774	3.38602e-07	0.2774	1.6272e-07	0.2774	1.39984e-07
0.27985	5.04486e-07	0.27985	3.43118e-07	0.27985	1.64734e-07	0.27985	1.41693e-07
0.28229	5.10651e-07	0.28229	3.48337e-07	0.28229	1.66138e-07	0.28229	1.43555e-07
0.28473	5.17303e-07	0.28473	3.53464e-07	0.28473	1.67542e-07	0.28473	1.45508e-07
0.28717	5.23621e-07	0.28717	3.5856e-07	0.28717	1.69678e-07	0.28717	1.47278e-07
0.28961	5.30701e-07	0.28961	3.63656e-07	0.28961	1.71448e-07	0.28961	1.49353e-07
0.29205	5.35278e-07	0.29205	3.69729e-07	0.29205	1.73462e-07	0.29205	1.50818e-07
0.29449	5.42847e-07	0.29449	3.7742e-07	0.29449	1.75873e-07	0.29449	1.52618e-07
0.29694	5.49561e-07	0.29694	3.82791e-07	0.29694	1.77185e-07	0.29694	1.53717e-07
0.29938	5.56793e-07	0.29938	3.8862e-07	0.29938	1.79657e-07	0.29938	1.56036e-07
0.30182	5.63721e-07	0.30182	3.95151e-07	0.30182	1.81305e-07	0.30182	1.57471e-07
0.30426	5.69946e-07	0.30426	4.01956e-07	0.30426	1.83502e-07	0.30426	1.59058e-07
0.3067	5.77362e-07	0.3067	4.08761e-07	0.3067	1.85577e-07	0.3067	1.60431e-07
0.30914	5.82947e-07	0.30914	4.14529e-07	0.30914	1.88019e-07	0.30914	1.61377e-07
0.31158	5.88745e-07	0.31158	4.20663e-07	0.31158	1.89911e-07	0.31158	1.62598e-07
0.31403	5.97076e-07	0.31403	4.28781e-07	0.31403	1.92169e-07	0.31403	1.6333e-07
0.31647	6.02112e-07	0.31647	4.358e-07	0.31647	1.94397e-07	0.31647	1.64001e-07
0.31891	6.08521e-07	0.31891	4.42819e-07	0.31891	1.96259e-07	0.31891	1.64978e-07
0.32135	6.1554e-07	0.32135	4.50021e-07	0.32135	1.98517e-07	0.32135	1.66534e-07
0.32379	6.22864e-07	0.32379	4.5643e-07	0.32379	2.00806e-07	0.32379	1.67938e-07
0.32623	6.31104e-07	0.32623	4.63449e-07	0.32623	2.03003e-07	0.32623	1.69342e-07
0.32867	6.38428e-07	0.32867	4.69858e-07	0.32867	2.05109e-07	0.32867	1.70593e-07
0.33112	6.46057e-07	0.33112	4.76571e-07	0.33112	2.07092e-07	0.33112	1.71539e-07
0.33356	6.55212e-07	0.33356	4.8237e-07	0.33356	2.099e-07	0.33356	1.72974e-07
0.336	6.61621e-07	0.336	4.89999e-07	0.336	2.11456e-07	0.336	1.74286e-07
0.33844	6.68945e-07	0.33844	4.97934e-07	0.33844	2.13684e-07	0.33844	1.7572e-07
0.34088	6.7627e-07	0.34088	5.05868e-07	0.34088	2.15729e-07	0.34088	1.77521e-07
0.34332	6.82068e-07	0.34332	5.14718e-07	0.34332	2.1814e-07	0.34332	1.78467e-07
0.34576	6.88171e-07	0.34576	5.21127e-07	0.34576	2.20093e-07	0.34576	1.79962e-07
0.34821	6.96411e-07	0.34821	5.29367e-07	0.34821	2.22717e-07	0.34821	1.82037e-07
0.35065	7.04041e-07	0.35065	5.36386e-07	0.35065	2.25281e-07	0.35065	1.83289e-07
0.35309	7.10144e-07	0.35309	5.44015e-07	0.35309	2.27264e-07	0.35309	1.8454e-07
0.35553	7.18689e-07	0.35553	5.52255e-07	0.35553	2.2934e-07	0.35553	1.85303e-07
0.35797	7.25098e-07	0.35797	5.59274e-07	0.35797	2.31079e-07	0.35797	1.8692e-07
0.36041	7.33948e-07	0.36041	5.64462e-07	0.36041	2.33063e-07	0.36041	1.87622e-07
0.36285	7.41577e-07	0.36285	5.70871e-07	0.36285	2.35809e-07	0.36285	1.88934e-07
0.3653	7.50427e-07	0.3653	5.78805e-07	0.3653	2.38159e-07	0.3653	1.89453e-07
0.36774	7.59277e-07	0.36774	5.86435e-07	0.36774	2.40479e-07	0.36774	1.90216e-07
0.37018	7.68738e-07	0.37018	5.92233e-07	0.37018	2.42279e-07	0.37018	1.90643e-07
0.37262	7.77588e-07	0.37262	6.01694e-07	0.37262	2.44873e-07	0.37262	1.91528e-07
0.37506	7.85828e-07	0.37506	6.08102e-07	0.37506	2.46613e-07	0.37506	1.92627e-07
0.3775	7.96204e-07	0.3775	6.17258e-07	0.3775	2.4881e-07	0.3775	1.93542e-07
0.37994	8.05359e-07	0.37994	6.25497e-07	0.37994	2.50519e-07	0.37994	1.94336e-07
0.38239	8.14819e-07	0.38239	6.36789e-07	0.38239	2.53021e-07	0.38239	1.9577e-07
0.38483	8.23059e-07	0.38483	6.43503e-07	0.38483	2.54852e-07	0.38483	1.96442e-07
0.38727	8.31299e-07	0.38727	6.53268e-07	0.38727	2.56958e-07	0.38727	1.97479e-07
0.38971	8.38318e-07	0.38971	6.63034e-07	0.38971	2.58392e-07	0.38971	1.98608e-07
0.39215	8.46558e-07	0.39215	6.73715e-07	0.39215	2.60376e-07	0.39215	1.99982e-07
0.39459	8.55103e-07	0.39459	6.8165e-07	0.39459	2.62024e-07	0.39459	2.01294e-07
0.39703	8.62427e-07	0.39703	6.905e-07	0.39703	2.63916e-07	0.39703	2.02545e-07
0.39948	8.69141e-07	0.39948	6.99045e-07	0.39948	2.66052e-07	0.39948	2.03064e-07
0.40192	8.77075e-07	0.40192	7.06369e-07	0.40192	2.6825e-07	0.40192	2.04559e-07
0.40436	8.84094e-07	0.40436	7.15829e-07	0.40436	2.69684e-07	0.40436	2.05688e-07
0.4068	8.92639e-07	0.4068	7.2651e-07	0.4068	2.71606e-07	0.4068	2.06726e-07
0.40924	9.01794e-07	0.40924	7.33835e-07	0.40924	2.73407e-07	0.40924	2.06635e-07
0.41168	9.10645e-07	0.41168	7.436e-07	0.41168	2.75879e-07	0.41168	2.07489e-07
0.41412	9.19189e-07	0.41412	7.5245e-07	0.41412	2.7713e-07	0.41412	2.07489e-07
0.41656	9.30176e-07	0.41656	7.62826e-07	0.41656	2.7951e-07	0.41656	2.07794e-07
0.41901	9.40552e-07	0.41901	7.72592e-07	0.41901	2.81067e-07	0.41901	2.08313e-07
0.42145	9.50623e-07	0.42145	7.82052e-07	0.42145	2.82959e-07	0.42145	2.08954e-07
0.42389	9.60693e-07	0.42389	7.90903e-07	0.42389	2.84241e-07	0.42389	2.0816e-07
0.42633	9.7168e-07	0.42633	8.00973e-07	0.42633	2.85797e-07	0.42633	2.09045e-07
0.42877	9.79004e-07	0.42877	8.10129e-07	0.42877	2.86987e-07	0.42877	2.09106e-07
0.43121	9.8938e-07	0.43121	8.19284e-07	0.43121	2.88635e-07	0.43121	2.09137e-07
0.43365	9.96704e-07	0.43365	8.27524e-07	0.43365	2.89124e-07	0.43365	2.10022e-07
0.4361	1.00769e-06	0.4361	8.35153e-07	0.4361	2.9071e-07	0.4361	2.10144e-07
0.43854	1.01501e-06	0.43854	8.45834e-07	0.43854	2.91687e-07	0.43854	2.10083e-07
0.44098	1.02631e-06	0.44098	8.54989e-07	0.44098	2.92297e-07	0.44098	2.09869e-07
0.44342	1.03333e-06	0.44342	8.64145e-07	0.44342	2.93335e-07	0.44342	2.10632e-07
0.44586	1.04401e-06	0.44586	8.74521e-07	0.44586	2.94312e-07	0.44586	2.10693e-07
0.4483	1.05286e-06	0.4483	8.83371e-07	0.4483	2.95105e-07	0.4483	2.10815e-07
0.45074	1.0614e-06	0.45074	8.94357e-07	0.45074	2.95593e-07	0.45074	2.11182e-07
0.45319	1.07117e-06	0.45319	9.01376e-07	0.45319	2.9657e-07	0.45319	2.1167e-07
0.45563	1.08093e-06	0.45563	9.12057e-07	0.45563	2.97455e-07	0.45563	2.12402e-07
0.45807	1.09009e-06	0.45807	9.20297e-07	0.45807	2.98492e-07	0.45807	2.12189e-07
0.46051	1.10016e-06	0.46051	9.29147e-07	0.46051	2.99103e-07	0.46051	2.13226e-07
0.46295	1.1087e-06	0.46295	9.39828e-07	0.46295	2.99835e-07	0.46295	2.13043e-07
0.46539	1.11938e-06	0.46539	9.50509e-07	0.46539	2.99713e-07	0.46539	2.13287e-07
0.46783	1.12793e-06	0.46783	9.6058e-07	0.46783	2.99469e-07	0.46783	2.13898e-07
0.47028	1.13953e-06	0.47028	9.73092e-07	0.47028	2.99835e-07	0.47028	2.13867e-07
0.47272	1.14807e-06	0.47272	9.82858e-07	0.47272	2.99438e-07	0.47272	2.14294e-07
0.47516	1.15814e-06	0.47516	9.93844e-07	0.47516	2.99652e-07	0.47516	2.14355e-07
0.4776	1.16821e-06	0.4776	1.00208e-06	0.4776	3.0011e-07	0.4776	2.14752e-07
0.48004	1.1795e-06	0.48004	1.01307e-06	0.48004	3.00537e-07	0.48004	2.14661e-07
0.48248	1.18988e-06	0.48248	1.02192e-06	0.48248	3.00415e-07	0.48248	2.146e-07
0.48492	1.20087e-06	0.48492	1.03108e-06	0.48492	3.00507e-07	0.48492	2.14966e-07
0.48737	1.20941e-06	0.48737	1.03901e-06	0.48737	3.00598e-07	0.48737	2.15118e-07
0.48981	1.22101e-06	0.48981	1.05183e-06	0.48981	3.01178e-07	0.48981	2.15302e-07
0.49225	1.2323e-06	0.49225	1.06098e-06	0.49225	3.01422e-07	0.49225	2.15607e-07
0.49469	1.24359e-06	0.49469	1.0735e-06	0.49469	3.01544e-07	0.49469	2.15546e-07
0.49713	1.25427e-06	0.49713	1.08357e-06	0.49713	3.01849e-07	0.49713	2.16217e-07
0.49957	1.26465e-06	0.49957	1.09272e-06	0.49957	3.02216e-07	0.49957	2.17255e-07
0.50201	1.27289e-06	0.50201	1.10279e-06	0.50201	3.01697e-07	0.50201	2.17316e-07
0.50446	1.28632e-06	0.50446	1.11561e-06	0.50446	3.02429e-07	0.50446	2.18323e-07
0.5069	1.29761e-06	0.5069	1.1266e-06	0.5069	3.01727e-07	0.5069	2.19147e-07
0.50934	1.30768e-06	0.50934	1.13697e-06	0.50934	3.01086e-07	0.50934	2.19727e-07
0.51178	1.31927e-06	0.51178	1.14857e-06	0.51178	3.0072e-07	0.51178	2.19574e-07
0.51422	1.32935e-06	0.51422	1.15894e-06	0.51422	3.00842e-07	0.51422	2.19421e-07
0.51666	1.34216e-06	0.51666	1.16963e-06	0.51666	3.01331e-07	0.51666	2.1933e-07
0.5191	1.35498e-06	0.5191	1.18275e-06	0.5191	3.01941e-07	0.5191	2.19238e-07
0.52155	1.36627e-06	0.52155	1.19312e-06	0.52155	3.013e-07	0.52155	2.18964e-07
0.52399	1.37909e-06	0.52399	1.20381e-06	0.52399	3.01575e-07	0.52399	2.19788e-07
0.52643	1.39313e-06	0.52643	1.2154e-06	0.52643	3.02032e-07	0.52643	2.20154e-07
0.52887	1.40594e-06	0.52887	1.22822e-06	0.52887	3.02673e-07	0.52887	2.20734e-07
0.53131	1.41663e-06	0.53131	1.23921e-06	0.53131	3.03253e-07	0.53131	2.20764e-07
0.53375	1.42944e-06	0.53375	1.25202e-06	0.53375	3.03223e-07	0.53375	2.21497e-07
0.53619	1.44379e-06	0.53619	1.26423e-06	0.53619	3.03131e-07	0.53619	2.21497e-07
0.53864	1.45813e-06	0.53864	1.274e-06	0.53864	3.02917e-07	0.53864	2.22443e-07
0.54108	1.47186e-06	0.54108	1.2859e-06	0.54108	3.02216e-07	0.54108	2.22382e-07
0.54352	1.48254e-06	0.54352	1.29627e-06	0.54352	3.02795e-07	0.54352	2.22717e-07
0.54596	1.49353e-06	0.54596	1.31062e-06	0.54596	3.02612e-07	0.54596	2.23206e-07
0.5484	1.50391e-06	0.5484	1.32221e-06	0.5484	3.02826e-07	0.5484	2.23328e-07
0.55084	1.5152e-06	0.55084	1.33442e-06	0.55084	3.0365e-07	0.55084	2.23999e-07
0.55328	1.52954e-06	0.55328	1.34693e-06	0.55328	3.03406e-07	0.55328	2.2345e-07
0.55573	1.54266e-06	0.55573	1.36036e-06	0.55573	3.04169e-07	0.55573	2.23724e-07
0.55817	1.55518e-06	0.55817	1.37226e-06	0.55817	3.04688e-07	0.55817	2.24365e-07
0.56061	1.56799e-06	0.56061	1.38416e-06	0.56061	3.05603e-07	0.56061	2.24579e-07
0.56305	1.58173e-06	0.56305	1.3982e-06	0.56305	3.06274e-07	0.56305	2.24579e-07
0.56549	1.59576e-06	0.56549	1.41071e-06	0.56549	3.06122e-07	0.56549	2.24701e-07
0.56793	1.61072e-06	0.56793	1.42384e-06	0.56793	3.06305e-07	0.56793	2.258e-07
0.57037	1.62506e-06	0.57037	1.43635e-06	0.57037	3.06854e-07	0.57037	2.26501e-07
0.57281	1.63757e-06	0.57281	1.44917e-06	0.57281	3.08075e-07	0.57281	2.27905e-07
0.57526	1.651e-06	0.57526	1.46198e-06	0.57526	3.08899e-07	0.57526	2.28912e-07
0.5777	1.66534e-06	0.5777	1.47724e-06	0.5777	3.08716e-07	0.5777	2.29279e-07
0.58014	1.67847e-06	0.58014	1.48823e-06	0.58014	3.08899e-07	0.58014	2.29279e-07
0.58258	1.69312e-06	0.58258	1.50379e-06	0.58258	3.08929e-07	0.58258	2.29492e-07
0.58502	1.70471e-06	0.58502	1.5157e-06	0.58502	3.09387e-07	0.58502	2.29675e-07
0.58746	1.71936e-06	0.58746	1.53004e-06	0.58746	3.09509e-07	0.58746	2.30042e-07
0.5899	1.73157e-06	0.5899	1.54347e-06	0.5899	3.09875e-07	0.5899	2.30469e-07
0.59235	1.74591e-06	0.59235	1.55811e-06	0.59235	3.10822e-07	0.59235	2.30133e-07
0.59479	1.75812e-06	0.59479	1.57276e-06	0.59479	3.11707e-07	0.59479	2.30652e-07
0.59723	1.77216e-06	0.59723	1.58711e-06	0.59723	3.12775e-07	0.59723	2.30255e-07
0.59967	1.7865e-06	0.59967	1.60206e-06	0.59967	3.13904e-07	0.59967	2.31232e-07
0.60211	1.80145e-06	0.60211	1.61579e-06	0.60211	3.15704e-07	0.60211	2.32239e-07
0.60455	1.81549e-06	0.60455	1.63105e-06	0.60455	3.1723e-07	0.60455	2.33429e-07
0.60699	1.83044e-06	0.60699	1.64723e-06	0.60699	3.18329e-07	0.60699	2.33978e-07
0.60944	1.84387e-06	0.60944	1.66157e-06	0.60944	3.1897e-07	0.60944	2.34711e-07
0.61188	1.85913e-06	0.61188	1.6753e-06	0.61188	3.19824e-07	0.61188	2.36572e-07
0.61432	1.87378e-06	0.61432	1.68873e-06	0.61432	3.2077e-07	0.61432	2.36877e-07
0.61676	1.88965e-06	0.61676	1.70277e-06	0.61676	3.21655e-07	0.61676	2.38495e-07
0.6192	1.90247e-06	0.6192	1.71772e-06	0.6192	3.22449e-07	0.6192	2.38739e-07
0.62164	1.92017e-06	0.62164	1.73237e-06	0.62164	3.22815e-07	0.62164	2.38953e-07
0.62408	1.93268e-06	0.62408	1.74702e-06	0.62408	3.23303e-07	0.62408	2.39563e-07
0.62653	1.94855e-06	0.62653	1.76136e-06	0.62653	3.23914e-07	0.62653	2.41302e-07
0.62897	1.96442e-06	0.62897	1.77509e-06	0.62897	3.24829e-07	0.62897	2.42676e-07
0.63141	1.97876e-06	0.63141	1.78944e-06	0.63141	3.2605e-07	0.63141	2.44324e-07
0.63385	1.99524e-06	0.63385	1.80287e-06	0.63385	3.27026e-07	0.63385	2.45972e-07
0.63629	2.00989e-06	0.63629	1.81812e-06	0.63629	3.28918e-07	0.63629	2.45514e-07
0.63873	2.02576e-06	0.63873	1.83308e-06	0.63873	3.30109e-07	0.63873	2.45148e-07
0.64117	2.03918e-06	0.64117	1.84925e-06	0.64117	3.30963e-07	0.64117	2.45605e-07
0.64362	2.05475e-06	0.64362	1.86115e-06	0.64362	3.31665e-07	0.64362	2.45789e-07
0.64606	2.0694e-06	0.64606	1.88038e-06	0.64606	3.3313e-07	0.64606	2.47101e-07
0.6485	2.08496e-06	0.6485	1.8935e-06	0.6485	3.33344e-07	0.6485	2.48291e-07
0.65094	2.10083e-06	0.65094	1.90846e-06	0.65094	3.35052e-07	0.65094	2.49176e-07
0.65338	2.11456e-06	0.65338	1.92219e-06	0.65338	3.35602e-07	0.65338	2.49756e-07
0.65582	2.13074e-06	0.65582	1.93836e-06	0.65582	3.36304e-07	0.65582	2.50458e-07
0.65826	2.14783e-06	0.65826	1.9521e-06	0.65826	3.36975e-07	0.65826	2.52808e-07
0.66071	2.16431e-06	0.66071	1.96827e-06	0.66071	3.39264e-07	0.66071	2.55371e-07
0.66315	2.18109e-06	0.66315	1.98231e-06	0.66315	3.41064e-07	0.66315	2.57111e-07
0.66559	2.19604e-06	0.66559	1.99665e-06	0.66559	3.42896e-07	0.66559	2.59064e-07
0.66803	2.21069e-06	0.66803	2.01038e-06	0.66803	3.44757e-07	0.66803	2.60406e-07
0.67047	2.22565e-06	0.67047	2.0287e-06	0.67047	3.45703e-07	0.67047	2.61261e-07
0.67291	2.24182e-06	0.67291	2.04212e-06	0.67291	3.47229e-07	0.67291	2.6239e-07
0.67535	2.25861e-06	0.67535	2.05769e-06	0.67535	3.4848e-07	0.67535	2.63e-07
0.6778	2.27356e-06	0.6778	2.07478e-06	0.6778	3.49762e-07	0.6778	2.63184e-07
0.68024	2.29218e-06	0.68024	2.09187e-06	0.68024	3.50342e-07	0.68024	2.63916e-07
0.68268	2.30804e-06	0.68268	2.10468e-06	0.68268	3.51227e-07	0.68268	2.65015e-07
0.68512	2.32391e-06	0.68512	2.12238e-06	0.68512	3.52417e-07	0.68512	2.65472e-07
0.68756	2.33887e-06	0.68756	2.13581e-06	0.68756	3.53485e-07	0.68756	2.67029e-07
0.69	2.35382e-06	0.69	2.14955e-06	0.69	3.54706e-07	0.69	2.68616e-07
0.69244	2.36786e-06	0.69244	2.16572e-06	0.69244	3.55835e-07	0.69244	2.68951e-07
0.69489	2.38434e-06	0.69489	2.18189e-06	0.69489	3.573e-07	0.69489	2.70111e-07
0.69733	2.40082e-06	0.69733	2.19776e-06	0.69733	3.58704e-07	0.69733	2.71454e-07
0.69977	2.41669e-06	0.69977	2.21485e-06	0.69977	3.59863e-07	0.69977	2.72156e-07
0.70221	2.43195e-06	0.70221	2.22828e-06	0.70221	3.60504e-07	0.70221	2.72095e-07
0.70465	2.45087e-06	0.70465	2.24598e-06	0.70465	3.62061e-07	0.70465	2.72705e-07
0.70709	2.46613e-06	0.70709	2.26307e-06	0.70709	3.63892e-07	0.70709	2.724e-07
0.70953	2.48291e-06	0.70953	2.28108e-06	0.70953	3.65356e-07	0.70953	2.73407e-07
0.71198	2.49756e-06	0.71198	2.3e-06	0.71198	3.66394e-07	0.71198	2.73895e-07
0.71442	2.51373e-06	0.71442	2.31648e-06	0.71442	3.68408e-07	0.71442	2.75696e-07
0.71686	2.5296e-06	0.71686	2.33235e-06	0.71686	3.6972e-07	0.71686	2.76245e-07
0.7193	2.54608e-06	0.7193	2.35005e-06	0.7193	3.71521e-07	0.7193	2.76825e-07
0.72174	2.56195e-06	0.72174	2.365e-06	0.72174	3.72467e-07	0.72174	2.76794e-07
0.72418	2.57874e-06	0.72418	2.38056e-06	0.72418	3.74023e-07	0.72418	2.78168e-07
0.72662	2.59491e-06	0.72662	2.39491e-06	0.72662	3.75153e-07	0.72662	2.78717e-07
0.72906	2.612e-06	0.72906	2.4123e-06	0.72906	3.77014e-07	0.72906	2.8006e-07
0.73151	2.62665e-06	0.73151	2.42787e-06	0.73151	3.78448e-07	0.73151	2.82135e-07
0.73395	2.64343e-06	0.73395	2.44404e-06	0.73395	3.79913e-07	0.73395	2.8421e-07
0.73639	2.65686e-06	0.73639	2.45869e-06	0.73639	3.81714e-07	0.73639	2.86163e-07
0.73883	2.67395e-06	0.73883	2.47547e-06	0.73883	3.83453e-07	0.73883	2.87659e-07
0.74127	2.68799e-06	0.74127	2.49012e-06	0.74127	3.84369e-07	0.74127	2.88879e-07
0.74371	2.70294e-06	0.74371	2.50416e-06	0.74371	3.86017e-07	0.74371	2.89429e-07
0.74615	2.71729e-06	0.74615	2.51942e-06	0.74615	3.87543e-07	0.74615	2.89886e-07
0.7486	2.73224e-06	0.7486	2.53559e-06	0.7486	3.89099e-07	0.7486	2.90955e-07
0.75104	2.74628e-06	0.75104	2.54841e-06	0.75104	3.909e-07	0.75104	2.93213e-07
0.75348	2.76367e-06	0.75348	2.56458e-06	0.75348	3.92365e-07	0.75348	2.94769e-07
0.75592	2.78015e-06	0.75592	2.57862e-06	0.75592	3.94287e-07	0.75592	2.95807e-07
0.75836	2.7948e-06	0.75836	2.59541e-06	0.75836	3.96027e-07	0.75836	2.96265e-07
0.7608	2.81006e-06	0.7608	2.60853e-06	0.7608	3.97217e-07	0.7608	2.97455e-07
0.76324	2.82562e-06	0.76324	2.6247e-06	0.76324	3.98926e-07	0.76324	2.9953e-07
0.76569	2.8418e-06	0.76569	2.63661e-06	0.76569	4.00421e-07	0.76569	3.01392e-07
0.76813	2.85553e-06	0.76813	2.64973e-06	0.76813	4.02618e-07	0.76813	3.02948e-07
0.77057	2.86957e-06	0.77057	2.66346e-06	0.77057	4.04602e-07	0.77057	3.03558e-07
0.77301	2.88452e-06	0.77301	2.67628e-06	0.77301	4.06769e-07	0.77301	3.04199e-07
0.77545	2.89795e-06	0.77545	2.69062e-06	0.77545	4.0921e-07	0.77545	3.05756e-07
0.77789	2.91107e-06	0.77789	2.7068e-06	0.77789	4.10248e-07	0.77789	3.08105e-07
0.78033	2.92358e-06	0.78033	2.71839e-06	0.78033	4.12659e-07	0.78033	3.08594e-07
0.78278	2.93732e-06	0.78278	2.73304e-06	0.78278	4.14551e-07	0.78278	3.09082e-07
0.78522	2.94952e-06	0.78522	2.74738e-06	0.78522	4.16168e-07	0.78522	3.09814e-07
0.78766	2.96356e-06	0.78766	2.76234e-06	0.78766	4.18488e-07	0.78766	3.11646e-07
0.7901	2.97577e-06	0.7901	2.77546e-06	0.7901	4.20502e-07	0.7901	3.13202e-07
0.79254	2.9895e-06	0.79254	2.78919e-06	0.79254	4.23096e-07	0.79254	3.15643e-07
0.79498	2.99835e-06	0.79498	2.80201e-06	0.79498	4.245e-07	0.79498	3.16437e-07
0.79742	3.01056e-06	0.79742	2.81361e-06	0.79742	4.26727e-07	0.79742	3.18665e-07
0.79987	3.02063e-06	0.79987	2.82276e-06	0.79987	4.27948e-07	0.79987	3.20404e-07
0.80231	3.03223e-06	0.80231	2.83497e-06	0.80231	4.30084e-07	0.80231	3.22784e-07
0.80475	3.04138e-06	0.80475	2.84565e-06	0.80475	4.31824e-07	0.80475	3.23395e-07
0.80719	3.05176e-06	0.80719	2.85755e-06	0.80719	4.3396e-07	0.80719	3.23151e-07
0.80963	3.06427e-06	0.80963	2.86762e-06	0.80963	4.36066e-07	0.80963	3.24036e-07
0.81207	3.07587e-06	0.81207	2.88014e-06	0.81207	4.37927e-07	0.81207	3.24951e-07
0.81451	3.08533e-06	0.81451	2.88777e-06	0.81451	4.38965e-07	0.81451	3.26385e-07
0.81696	3.09631e-06	0.81696	2.89997e-06	0.81696	4.41101e-07	0.81696	3.26447e-07
0.8194	3.10577e-06	0.8194	2.90608e-06	0.8194	4.42352e-07	0.8194	3.28003e-07
0.82184	3.11462e-06	0.82184	2.91645e-06	0.82184	4.44092e-07	0.82184	3.30139e-07
0.82428	3.12317e-06	0.82428	2.92378e-06	0.82428	4.45282e-07	0.82428	3.32916e-07
0.82672	3.1308e-06	0.82672	2.93385e-06	0.82672	4.46838e-07	0.82672	3.35419e-07
0.82916	3.13812e-06	0.82916	2.93965e-06	0.82916	4.48456e-07	0.82916	3.38135e-07
0.8316	3.14636e-06	0.8316	2.9488e-06	0.8316	4.50867e-07	0.8316	3.40271e-07
0.83405	3.15186e-06	0.83405	2.9546e-06	0.83405	4.5282e-07	0.83405	3.41644e-07
0.83649	3.15826e-06	0.83649	2.9607e-06	0.83649	4.54956e-07	0.83649	3.44055e-07
0.83893	3.16345e-06	0.83893	2.96375e-06	0.83893	4.57031e-07	0.83893	3.45581e-07
0.84137	3.17108e-06	0.84137	2.97016e-06	0.84137	4.59869e-07	0.84137	3.45917e-07
0.84381	3.17505e-06	0.84381	2.97444e-06	0.84381	4.61761e-07	0.84381	3.44849e-07
0.84625	3.17993e-06	0.84625	2.97749e-06	0.84625	4.64355e-07	0.84625	3.44604e-07
0.84869	3.18451e-06	0.84869	2.9842e-06	0.84869	4.6637e-07	0.84869	3.44666e-07
0.85114	3.18909e-06	0.85114	2.98847e-06	0.85114	4.69299e-07	0.85114	3.46527e-07
0.85358	3.19458e-06	0.85358	2.99153e-06	0.85358	4.72137e-07	0.85358	3.4845e-07
0.85602	3.20007e-06	0.85602	2.9958e-06	0.85602	4.7467e-07	0.85602	3.4964e-07
0.85846	3.20221e-06	0.85846	2.99824e-06	0.85846	4.77264e-07	0.85846	3.50708e-07
0.8609	3.20404e-06	0.8609	3.00068e-06	0.8609	4.7937e-07	0.8609	3.52417e-07
0.86334	3.20648e-06	0.86334	3.00068e-06	0.86334	4.81079e-07	0.86334	3.53516e-07
0.86578	3.20984e-06	0.86578	3.00068e-06	0.86578	4.82635e-07	0.86578	3.55194e-07
0.86823	3.21014e-06	0.86823	3.00221e-06	0.86823	4.83521e-07	0.86823	3.55865e-07
0.87067	3.21228e-06	0.87067	3.00434e-06	0.87067	4.8526e-07	0.87067	3.56659e-07
0.87311	3.21289e-06	0.87311	3.00404e-06	0.87311	4.87152e-07	0.87311	3.5788e-07
0.87555	3.21442e-06	0.87555	3.00526e-06	0.87555	4.89136e-07	0.87555	3.60107e-07
0.87799	3.21503e-06	0.87799	3.00587e-06	0.87799	4.90875e-07	0.87799	3.63342e-07
0.88043	3.21533e-06	0.88043	3.00434e-06	0.88043	4.93317e-07	0.88043	3.66669e-07
0.88287	3.21442e-06	0.88287	3.00282e-06	0.88287	4.95392e-07	0.88287	3.69354e-07
0.88531	3.21381e-06	0.88531	3.0019e-06	0.88531	4.98199e-07	0.88531	3.72528e-07
0.88776	3.21411e-06	0.88776	3.0016e-06	0.88776	5.00397e-07	0.88776	3.75732e-07
0.8902	3.2132e-06	0.8902	3.00251e-06	0.8902	5.03235e-07	0.8902	3.79059e-07
0.89264	3.21259e-06	0.89264	3.00251e-06	0.89264	5.05737e-07	0.89264	3.80981e-07
0.89508	3.2132e-06	0.89508	3.0019e-06	0.89508	5.0882e-07	0.89508	3.8269e-07
0.89752	3.2132e-06	0.89752	2.99976e-06	0.89752	5.10986e-07	0.89752	3.83667e-07
0.89996	3.21228e-06	0.89996	2.99885e-06	0.89996	5.13214e-07	0.89996	3.84308e-07
0.9024	3.21075e-06	0.9024	2.99641e-06	0.9024	5.159e-07	0.9024	3.85132e-07
0.90485	3.20984e-06	0.90485	2.99488e-06	0.90485	5.18951e-07	0.90485	3.88885e-07
0.90729	3.20801e-06	0.90729	2.99427e-06	0.90729	5.20233e-07	0.90729	3.91052e-07
0.90973	3.20587e-06	0.90973	2.9961e-06	0.90973	5.224e-07	0.90973	3.92761e-07
0.91217	3.20343e-06	0.91217	2.99214e-06	0.91217	5.24841e-07	0.91217	3.94623e-07
0.91461	3.20282e-06	0.91461	2.99153e-06	0.91461	5.28137e-07	0.91461	3.96332e-07
0.91705	3.20038e-06	0.91705	2.98756e-06	0.91705	5.30579e-07	0.91705	3.98376e-07
0.91949	3.19763e-06	0.91949	2.98664e-06	0.91949	5.33173e-07	0.91949	4.01489e-07
0.92194	3.19336e-06	0.92194	2.98206e-06	0.92194	5.35431e-07	0.92194	4.02771e-07
0.92438	3.19031e-06	0.92438	2.98054e-06	0.92438	5.37659e-07	0.92438	4.02649e-07
0.92682	3.18665e-06	0.92682	2.97749e-06	0.92682	5.40405e-07	0.92682	4.0506e-07
0.92926	3.18512e-06	0.92926	2.97688e-06	0.92926	5.43213e-07	0.92926	4.09454e-07
0.9317	3.17871e-06	0.9317	2.9723e-06	0.9317	5.46509e-07	0.9317	4.12811e-07
0.93414	3.17749e-06	0.93414	2.96742e-06	0.93414	5.49713e-07	0.93414	4.16931e-07
0.93658	3.17535e-06	0.93658	2.96192e-06	0.93658	5.52277e-07	0.93658	4.19342e-07
0.93903	3.17413e-06	0.93903	2.96375e-06	0.93903	5.55023e-07	0.93903	4.23187e-07
0.94147	3.17078e-06	0.94147	2.96253e-06	0.94147	5.58075e-07	0.94147	4.25415e-07
0.94391	3.16986e-06	0.94391	2.96162e-06	0.94391	5.60638e-07	0.94391	4.26758e-07
0.94635	3.16742e-06	0.94635	2.96009e-06	0.94635	5.63232e-07	0.94635	4.27368e-07
0.94879	3.16437e-06	0.94879	2.95979e-06	0.94879	5.66467e-07	0.94879	4.29901e-07
0.95123	3.16498e-06	0.95123	2.95674e-06	0.95123	5.68573e-07	0.95123	4.32434e-07
0.95367	3.16162e-06	0.95367	2.95521e-06	0.95367	5.72205e-07	0.95367	4.35486e-07
0.95612	3.16071e-06	0.95612	2.95033e-06	0.95612	5.75256e-07	0.95612	4.37897e-07
0.95856	3.15857e-06	0.95856	2.9485e-06	0.95856	5.77759e-07	0.95856	4.40186e-07
0.961	3.15704e-06	0.961	2.94392e-06	0.961	5.81268e-07	0.961	4.41162e-07
0.96344	3.15674e-06	0.96344	2.9427e-06	0.96344	5.8432e-07	0.96344	4.4397e-07
0.96588	3.1546e-06	0.96588	2.93873e-06	0.96588	5.88257e-07	0.96588	4.46777e-07
0.96832	3.15216e-06	0.96832	2.94056e-06	0.96832	5.91583e-07	0.96832	4.5047e-07
0.97076	3.15125e-06	0.97076	2.93781e-06	0.97076	5.94147e-07	0.97076	4.52728e-07
0.97321	3.1488e-06	0.97321	2.93903e-06	0.97321	5.97229e-07	0.97321	4.54285e-07
0.97565	3.14514e-06	0.97565	2.93903e-06	0.97565	6.00342e-07	0.97565	4.56879e-07
0.97809	3.14514e-06	0.97809	2.93751e-06	0.97809	6.02112e-07	0.97809	4.58618e-07
0.98053	3.1424e-06	0.98053	2.93476e-06	0.98053	6.04553e-07	0.98053	4.59198e-07
0.98297	3.14209e-06	0.98297	2.93141e-06	0.98297	6.06995e-07	0.98297	4.60693e-07
0.98541	3.14178e-06	0.98541	2.92988e-06	0.98541	6.10046e-07	0.98541	4.62463e-07
0.98785	3.13965e-06	0.98785	2.92591e-06	0.98785	6.13708e-07	0.98785	4.65607e-07
0.9903	3.13934e-06	0.9903	2.92469e-06	0.9903	6.16455e-07	0.9903	4.69025e-07
0.99274	3.13721e-06	0.99274	2.9253e-06	0.99274	6.19507e-07	0.99274	4.73236e-07
0.99518	3.13538e-06	0.99518	2.92469e-06	0.99518	6.22864e-07	0.99518	4.76624e-07
0.99762	3.1366e-06	0.99762	2.92439e-06	0.99762	6.26526e-07	0.99762	4.79584e-07
1.00006	3.13751e-06	1.00006	2.92286e-06	1.00006	6.29578e-07	1.00006	4.82574e-07
1.0025	3.13446e-06	1.0025	2.92011e-06	1.0025	6.3324e-07	1.0025	4.86115e-07
1.00494	3.13416e-06	1.00494	2.91645e-06	1.00494	6.36597e-07	1.00494	4.90265e-07
1.00739	3.13019e-06	1.00739	2.91432e-06	1.00739	6.40564e-07	1.00739	4.94659e-07
1.00983	3.12714e-06	1.00983	2.91462e-06	1.00983	6.44226e-07	1.00983	4.96887e-07
1.01227	3.12347e-06	1.01227	2.91462e-06	1.01227	6.47888e-07	1.01227	4.98444e-07
1.01471	3.12012e-06	1.01471	2.91615e-06	1.01471	6.5033e-07	1.01471	5.01282e-07
1.01715	3.12134e-06	1.01715	2.91676e-06	1.01715	6.54602e-07	1.01715	5.05127e-07
1.01959	3.11768e-06	1.01959	2.91584e-06	1.01959	6.56433e-07	1.01959	5.08698e-07
1.02203	3.11646e-06	1.02203	2.91432e-06	1.02203	6.5979e-07	1.02203	5.12024e-07
1.02448	3.11737e-06	1.02448	2.91462e-06	1.02448	6.61621e-07	1.02448	5.14862e-07
1.02692	3.11829e-06	1.02692	2.91462e-06	1.02692	6.64978e-07	1.02692	5.18463e-07
1.02936	3.11737e-06	1.02936	2.91645e-06	1.02936	6.66504e-07	1.02936	5.21057e-07
1.0318	3.12103e-06	1.0318	2.9192e-06	1.0318	6.70776e-07	1.0318	5.24902e-07
1.03424	3.12225e-06	1.03424	2.9192e-06	1.03424	6.73828e-07	1.03424	5.27679e-07
1.03668	3.12531e-06	1.03668	2.92347e-06	1.03668	6.77795e-07	1.03668	5.30609e-07
1.03912	3.12714e-06	1.03912	2.92469e-06	1.03912	6.81152e-07	1.03912	5.35034e-07
1.04156	3.12897e-06	1.04156	2.92622e-06	1.04156	6.8512e-07	1.04156	5.39337e-07
1.04401	3.12897e-06	1.04401	2.92927e-06	1.04401	6.88171e-07	1.04401	5.44464e-07
1.04645	3.13171e-06	1.04645	2.92896e-06	1.04645	6.92749e-07	1.04645	5.47943e-07
1.04889	3.13385e-06	1.04889	2.92988e-06	1.04889	6.94885e-07	1.04889	5.51788e-07
1.05133	3.13934e-06	1.05133	2.93141e-06	1.05133	6.97937e-07	1.05133	5.55786e-07
1.05377	3.14087e-06	1.05377	2.93171e-06	1.05377	7.01599e-07	1.05377	5.59509e-07
1.05621	3.14423e-06	1.05621	2.93232e-06	1.05621	7.05261e-07	1.05621	5.63995e-07
1.05865	3.14636e-06	1.05865	2.93293e-06	1.05865	7.08313e-07	1.05865	5.67749e-07
1.0611	3.14728e-06	1.0611	2.93476e-06	1.0611	7.13501e-07	1.0611	5.70618e-07
1.06354	3.14911e-06	1.06354	2.93568e-06	1.06354	7.17468e-07	1.06354	5.72876e-07
1.06598	3.15186e-06	1.06598	2.93751e-06	1.06598	7.2113e-07	1.06598	5.75562e-07
1.06842	3.15308e-06	1.06842	2.94056e-06	1.06842	7.23877e-07	1.06842	5.78613e-07
1.07086	3.15735e-06	1.07086	2.94453e-06	1.07086	7.28455e-07	1.07086	5.83618e-07
1.0733	3.15887e-06	1.0733	2.94697e-06	1.0733	7.30591e-07	1.0733	5.86914e-07
1.07574	3.1604e-06	1.07574	2.95124e-06	1.07574	7.34558e-07	1.07574	5.90332e-07
1.07819	3.16101e-06	1.07819	2.95368e-06	1.07819	7.39136e-07	1.07819	5.94513e-07
1.08063	3.16254e-06	1.08063	2.95796e-06	1.08063	7.42798e-07	1.08063	5.9845e-07
1.08307	3.16467e-06	1.08307	2.96284e-06	1.08307	7.48291e-07	1.08307	6.01318e-07
1.08551	3.16681e-06	1.08551	2.96742e-06	1.08551	7.52869e-07	1.08551	6.04858e-07
1.08795	3.17108e-06	1.08795	2.97016e-06	1.08795	7.57751e-07	1.08795	6.073e-07
1.09039	3.1778e-06	1.09039	2.97596e-06	1.09039	7.62939e-07	1.09039	6.10352e-07
1.09283	3.18237e-06	1.09283	2.98054e-06	1.09283	7.68127e-07	1.09283	6.14319e-07
1.09528	3.18848e-06	1.09528	2.98573e-06	1.09528	7.7179e-07	1.09528	6.18896e-07
1.09772	3.19366e-06	1.09772	2.99214e-06	1.09772	7.76062e-07	1.09772	6.24695e-07
1.10016	3.20129e-06	1.10016	2.99702e-06	1.10016	7.79419e-07	1.10016	6.30188e-07
1.1026	3.20831e-06	1.1026	3.00343e-06	1.1026	7.84302e-07	1.1026	6.3385e-07
1.10504	3.21533e-06	1.10504	3.00739e-06	1.10504	7.88269e-07	1.10504	6.37207e-07
1.10748	3.2196e-06	1.10748	3.01197e-06	1.10748	7.92847e-07	1.10748	6.39648e-07
1.10992	3.22693e-06	1.10992	3.01747e-06	1.10992	7.96814e-07	1.10992	6.43616e-07
1.11237	3.23212e-06	1.11237	3.02143e-06	1.11237	8.02002e-07	1.11237	6.46057e-07
1.11481	3.2373e-06	1.11481	3.02967e-06	1.11481	8.0658e-07	1.11481	6.51245e-07
1.11725	3.24371e-06	1.11725	3.03547e-06	1.11725	8.09631e-07	1.11725	6.54907e-07
1.11969	3.25012e-06	1.11969	3.04157e-06	1.11969	8.13904e-07	1.11969	6.58569e-07
1.12213	3.25378e-06	1.12213	3.04859e-06	1.12213	8.19397e-07	1.12213	6.61621e-07
1.12457	3.26141e-06	1.12457	3.05378e-06	1.12457	8.2428e-07	1.12457	6.66504e-07
1.12701	3.26752e-06	1.12701	3.05958e-06	1.12701	8.28552e-07	1.12701	6.70471e-07
1.12946	3.27332e-06	1.12946	3.06507e-06	1.12946	8.3313e-07	1.12946	6.77185e-07
1.1319	3.27698e-06	1.1319	3.07087e-06	1.1319	8.37402e-07	1.1319	6.83289e-07
1.13434	3.28094e-06	1.13434	3.07942e-06	1.13434	8.42285e-07	1.13434	6.87256e-07
1.13678	3.28827e-06	1.13678	3.08552e-06	1.13678	8.47168e-07	1.13678	6.90308e-07
1.13922	3.29346e-06	1.13922	3.09406e-06	1.13922	8.52051e-07	1.13922	6.92749e-07
1.14166	3.30078e-06	1.14166	3.102e-06	1.14166	8.56934e-07	1.14166	6.97632e-07
1.1441	3.30994e-06	1.1441	3.11024e-06	1.1441	8.61816e-07	1.1441	7.0282e-07
1.14655	3.31726e-06	1.14655	3.11665e-06	1.14655	8.65784e-07	1.14655	7.09839e-07
1.14899	3.33008e-06	1.14899	3.12489e-06	1.14899	8.70972e-07	1.14899	7.13806e-07
1.15143	3.33923e-06	1.15143	3.13221e-06	1.15143	8.73108e-07	1.15143	7.18994e-07
1.15387	3.34961e-06	1.15387	3.14228e-06	1.15387	8.76465e-07	1.15387	7.23572e-07
1.15631	3.35754e-06	1.15631	3.14747e-06	1.15631	8.81042e-07	1.15631	7.28455e-07
1.15875	3.36334e-06	1.15875	3.15815e-06	1.15875	8.8623e-07	1.15875	7.34863e-07
1.16119	3.3728e-06	1.16119	3.16731e-06	1.16119	8.89893e-07	1.16119	7.40356e-07
1.16364	3.38348e-06	1.16364	3.17646e-06	1.16364	8.94775e-07	1.16364	7.44324e-07
1.16608	3.38989e-06	1.16608	3.18745e-06	1.16608	8.99353e-07	1.16608	7.50122e-07
1.16852	3.39722e-06	1.16852	3.19904e-06	1.16852	9.04541e-07	1.16852	7.5592e-07
1.17096	3.40851e-06	1.17096	3.20912e-06	1.17096	9.09119e-07	1.17096	7.59888e-07
1.1734	3.41827e-06	1.1734	3.21888e-06	1.1734	9.14917e-07	1.1734	7.61414e-07
1.17584	3.42712e-06	1.17584	3.22865e-06	1.17584	9.20105e-07	1.17584	7.65686e-07
1.17828	3.43506e-06	1.17828	3.23933e-06	1.17828	9.25598e-07	1.17828	7.70264e-07
1.18073	3.44635e-06	1.18073	3.25153e-06	1.18073	9.30481e-07	1.18073	7.76978e-07
1.18317	3.45673e-06	1.18317	3.26374e-06	1.18317	9.35059e-07	1.18317	7.83997e-07
1.18561	3.46832e-06	1.18561	3.27046e-06	1.18561	9.40857e-07	1.18561	7.89185e-07
1.18805	3.48267e-06	1.18805	3.28236e-06	1.18805	9.46045e-07	1.18805	7.93457e-07
1.19049	3.49396e-06	1.19049	3.29273e-06	1.19049	9.50623e-07	1.19049	7.96509e-07
1.19293	3.50861e-06	1.19293	3.30341e-06	1.19293	9.56726e-07	1.19293	8.01697e-07
1.19537	3.52112e-06	1.19537	3.31257e-06	1.19537	9.62524e-07	1.19537	8.06885e-07
1.19781	3.53394e-06	1.19781	3.32569e-06	1.19781	9.68018e-07	1.19781	8.12073e-07
1.20026	3.54736e-06	1.20026	3.33668e-06	1.20026	9.73206e-07	1.20026	8.17261e-07
1.2027	3.55957e-06	1.2027	3.34858e-06	1.2027	9.79004e-07	1.2027	8.22144e-07
1.20514	3.5733e-06	1.20514	3.35957e-06	1.20514	9.83582e-07	1.20514	8.26721e-07
1.20758	3.58704e-06	1.20758	3.37269e-06	1.20758	9.90295e-07	1.20758	8.32214e-07
1.21002	3.59985e-06	1.21002	3.38276e-06	1.21002	9.95178e-07	1.21002	8.38318e-07
1.21246	3.61359e-06	1.21246	3.39375e-06	1.21246	1.00281e-06	1.21246	8.4259e-07
1.2149	3.62793e-06	1.2149	3.40473e-06	1.2149	1.0083e-06	1.2149	8.48999e-07
1.21735	3.6441e-06	1.21735	3.41541e-06	1.21735	1.01501e-06	1.21735	8.55408e-07
1.21979	3.65967e-06	1.21979	3.43006e-06	1.21979	1.02081e-06	1.21979	8.61816e-07
1.22223	3.67584e-06	1.22223	3.44441e-06	1.22223	1.02478e-06	1.22223	8.67615e-07
1.22467	3.69049e-06	1.22467	3.45905e-06	1.22467	1.03088e-06	1.22467	8.72192e-07
1.22711	3.70911e-06	1.22711	3.47614e-06	1.22711	1.03699e-06	1.22711	8.77991e-07
1.22955	3.72437e-06	1.22955	3.49049e-06	1.22955	1.04401e-06	1.22955	8.80737e-07
1.23199	3.74329e-06	1.23199	3.50849e-06	1.23199	1.05011e-06	1.23199	8.87451e-07
1.23444	3.7616e-06	1.23444	3.52436e-06	1.23444	1.05469e-06	1.23444	8.9386e-07
1.23688	3.77869e-06	1.23688	3.54115e-06	1.23688	1.05988e-06	1.23688	8.99048e-07
1.23932	3.79791e-06	1.23932	3.5558e-06	1.23932	1.06659e-06	1.23932	9.05151e-07
1.24176	3.81683e-06	1.24176	3.57075e-06	1.24176	1.073e-06	1.24176	9.11255e-07
1.2442	3.83453e-06	1.2442	3.58662e-06	1.2442	1.07941e-06	1.2442	9.16443e-07
1.24664	3.85223e-06	1.24664	3.60462e-06	1.24664	1.08582e-06	1.24664	9.22852e-07
1.24908	3.86932e-06	1.24908	3.61927e-06	1.24908	1.09283e-06	1.24908	9.27124e-07
1.25153	3.88763e-06	1.25153	3.63575e-06	1.25153	1.09955e-06	1.25153	9.31702e-07
1.25397	3.90686e-06	1.25397	3.65437e-06	1.25397	1.10565e-06	1.25397	9.38416e-07
1.25641	3.92639e-06	1.25641	3.67359e-06	1.25641	1.11267e-06	1.25641	9.43298e-07
1.25885	3.94623e-06	1.25885	3.69099e-06	1.25885	1.12e-06	1.25885	9.49402e-07
1.26129	3.96698e-06	1.26129	3.71021e-06	1.26129	1.1264e-06	1.26129	9.56421e-07
1.26373	3.98651e-06	1.26373	3.72822e-06	1.26373	1.13159e-06	1.26373	9.61609e-07
1.26617	4.0094e-06	1.26617	3.74684e-06	1.26617	1.13892e-06	1.26617	9.67102e-07
1.26862	4.02863e-06	1.26862	3.76515e-06	1.26862	1.14655e-06	1.26862	9.7229e-07
1.27106	4.05273e-06	1.27106	3.78742e-06	1.27106	1.15417e-06	1.27106	9.77173e-07
1.2735	4.07379e-06	1.2735	3.80726e-06	1.2735	1.16089e-06	1.2735	9.81445e-07
1.27594	4.09851e-06	1.27594	3.82618e-06	1.27594	1.16669e-06	1.27594	9.88159e-07
1.27838	4.12018e-06	1.27838	3.84968e-06	1.27838	1.17401e-06	1.27838	9.94263e-07
1.28082	4.14581e-06	1.28082	3.87165e-06	1.28082	1.18103e-06	1.28082	9.99756e-07
1.28326	4.16901e-06	1.28326	3.89301e-06	1.28326	1.18683e-06	1.28326	1.00555e-06
1.28571	4.19617e-06	1.28571	3.91865e-06	1.28571	1.19293e-06	1.28571	1.0141e-06
1.28815	4.22363e-06	1.28815	3.94337e-06	1.28815	1.19904e-06	1.28815	1.01898e-06
1.29059	4.24713e-06	1.29059	3.96748e-06	1.29059	1.20605e-06	1.29059	1.02478e-06
1.29303	4.27246e-06	1.29303	3.99159e-06	1.29303	1.21338e-06	1.29303	1.02875e-06
1.29547	4.29871e-06	1.29547	4.0157e-06	1.29547	1.22101e-06	1.29547	1.03302e-06
1.29791	4.32404e-06	1.29791	4.04499e-06	1.29791	1.22955e-06	1.29791	1.03821e-06
1.30035	4.3515e-06	1.30035	4.07337e-06	1.30035	1.23749e-06	1.30035	1.0434e-06
1.3028	4.37866e-06	1.3028	4.09992e-06	1.3028	1.24451e-06	1.3028	1.04767e-06
1.30524	4.40674e-06	1.30524	4.12892e-06	1.30524	1.25153e-06	1.30524	1.05347e-06
1.30768	4.43451e-06	1.30768	4.15455e-06	1.30768	1.25793e-06	1.30768	1.05865e-06
1.31012	4.46381e-06	1.31012	4.18415e-06	1.31012	1.26556e-06	1.31012	1.06628e-06
1.31256	4.49127e-06	1.31256	4.20918e-06	1.31256	1.27167e-06	1.31256	1.07178e-06
1.315	4.51874e-06	1.315	4.23908e-06	1.315	1.2793e-06	1.315	1.0791e-06
1.31744	4.54803e-06	1.31744	4.26777e-06	1.31744	1.28662e-06	1.31744	1.08612e-06
1.31989	4.57916e-06	1.31989	4.2989e-06	1.31989	1.29303e-06	1.31989	1.09161e-06
1.32233	4.60602e-06	1.32233	4.32789e-06	1.32233	1.30066e-06	1.32233	1.0968e-06
1.32477	4.6344e-06	1.32477	4.35475e-06	1.32477	1.30798e-06	1.32477	1.1026e-06
1.32721	4.66339e-06	1.32721	4.38374e-06	1.32721	1.31531e-06	1.32721	1.1087e-06
1.32965	4.69574e-06	1.32965	4.41731e-06	1.32965	1.32599e-06	1.32965	1.1145e-06
1.33209	4.72504e-06	1.33209	4.44965e-06	1.33209	1.33453e-06	1.33209	1.11969e-06
1.33453	4.75861e-06	1.33453	4.48475e-06	1.33453	1.34247e-06	1.33453	1.12671e-06
1.33698	4.78973e-06	1.33698	4.51771e-06	1.33698	1.34979e-06	1.33698	1.13403e-06
1.33942	4.82574e-06	1.33942	4.55677e-06	1.33942	1.35925e-06	1.33942	1.14075e-06
1.34186	4.85748e-06	1.34186	4.59126e-06	1.34186	1.36749e-06	1.34186	1.14685e-06
1.3443	4.89288e-06	1.3443	4.62818e-06	1.3443	1.37634e-06	1.3443	1.15204e-06
1.34674	4.92401e-06	1.34674	4.66297e-06	1.34674	1.38367e-06	1.34674	1.15814e-06
1.34918	4.96063e-06	1.34918	4.70356e-06	1.34918	1.39008e-06	1.34918	1.16577e-06
1.35162	4.99023e-06	1.35162	4.73622e-06	1.35162	1.39832e-06	1.35162	1.17279e-06
1.35406	5.02472e-06	1.35406	4.77375e-06	1.35406	1.40747e-06	1.35406	1.18011e-06
1.35651	5.05798e-06	1.35651	4.80946e-06	1.35651	1.41602e-06	1.35651	1.18713e-06
1.35895	5.0943e-06	1.35895	4.8476e-06	1.35895	1.42426e-06	1.35895	1.19507e-06
1.36139	5.12756e-06	1.36139	4.88148e-06	1.36139	1.43341e-06	1.36139	1.20056e-06
1.36383	5.1651e-06	1.36383	4.92146e-06	1.36383	1.44257e-06	1.36383	1.2085e-06
1.36627	5.20111e-06	1.36627	4.95777e-06	1.36627	1.45111e-06	1.36627	1.21521e-06
1.36871	5.23926e-06	1.36871	4.99867e-06	1.36871	1.45935e-06	1.36871	1.22192e-06
1.37115	5.27771e-06	1.37115	5.03773e-06	1.37115	1.4679e-06	1.37115	1.22925e-06
1.3736	5.31616e-06	1.3736	5.07954e-06	1.3736	1.47797e-06	1.3736	1.23627e-06
1.37604	5.35614e-06	1.37604	5.11799e-06	1.37604	1.48682e-06	1.37604	1.24298e-06
1.37848	5.4007e-06	1.37848	5.16194e-06	1.37848	1.49719e-06	1.37848	1.25e-06
1.38092	5.43884e-06	1.38092	5.20283e-06	1.38092	1.50604e-06	1.38092	1.25671e-06
1.38336	5.48035e-06	1.38336	5.24677e-06	1.38336	1.5155e-06	1.38336	1.26556e-06
1.3858	5.52063e-06	1.3858	5.28828e-06	1.3858	1.52374e-06	1.3858	1.27197e-06
1.38824	5.56671e-06	1.38824	5.33497e-06	1.38824	1.53442e-06	1.38824	1.28021e-06
1.39069	5.60883e-06	1.39069	5.37769e-06	1.39069	1.54449e-06	1.39069	1.28876e-06
1.39313	5.65216e-06	1.39313	5.42378e-06	1.39313	1.55518e-06	1.39313	1.29669e-06
1.39557	5.69672e-06	1.39557	5.46864e-06	1.39557	1.56494e-06	1.39557	1.30524e-06
1.39801	5.74066e-06	1.39801	5.51808e-06	1.39801	1.57532e-06	1.39801	1.31348e-06
1.40045	5.78186e-06	1.40045	5.56446e-06	1.40045	1.58325e-06	1.40045	1.3208e-06
1.40289	5.83099e-06	1.40289	5.61237e-06	1.40289	1.59454e-06	1.40289	1.32782e-06
1.40533	5.87463e-06	1.40533	5.65693e-06	1.40533	1.60522e-06	1.40533	1.33484e-06
1.40778	5.9201e-06	1.40778	5.70454e-06	1.40778	1.61499e-06	1.40778	1.34247e-06
1.41022	5.96832e-06	1.41022	5.75611e-06	1.41022	1.62659e-06	1.41022	1.34918e-06
1.41266	6.01746e-06	1.41266	5.80494e-06	1.41266	1.63574e-06	1.41266	1.35498e-06
1.4151	6.06995e-06	1.4151	5.85346e-06	1.4151	1.64734e-06	1.4151	1.36353e-06
1.41754	6.12488e-06	1.41754	5.90809e-06	1.41754	1.65771e-06	1.41754	1.37115e-06
1.41998	6.17065e-06	1.41998	5.95692e-06	1.41998	1.66473e-06	1.41998	1.38031e-06
1.42242	6.22253e-06	1.42242	6.01185e-06	1.42242	1.67725e-06	1.42242	1.38977e-06
1.42487	6.27441e-06	1.42487	6.06068e-06	1.42487	1.6864e-06	1.42487	1.39648e-06
1.42731	6.32629e-06	1.42731	6.11561e-06	1.42731	1.698e-06	1.42731	1.40625e-06
1.42975	6.37817e-06	1.42975	6.16749e-06	1.42975	1.70593e-06	1.42975	1.41174e-06
1.43219	6.43311e-06	1.43219	6.22242e-06	1.43219	1.71661e-06	1.43219	1.41968e-06
1.43463	6.48804e-06	1.43463	6.2743e-06	1.43463	1.72821e-06	1.43463	1.42731e-06
1.43707	6.53992e-06	1.43707	6.32923e-06	1.43707	1.7395e-06	1.43707	1.43616e-06
1.43951	6.5918e-06	1.43951	6.38111e-06	1.43951	1.75049e-06	1.43951	1.44409e-06
1.44196	6.64978e-06	1.44196	6.43604e-06	1.44196	1.76178e-06	1.44196	1.45233e-06
1.4444	6.70166e-06	1.4444	6.48792e-06	1.4444	1.77307e-06	1.4444	1.45996e-06
1.44684	6.7627e-06	1.44684	6.54591e-06	1.44684	1.7865e-06	1.44684	1.46973e-06
1.44928	6.82068e-06	1.44928	6.60084e-06	1.44928	1.79718e-06	1.44928	1.4798e-06
1.45172	6.88171e-06	1.45172	6.65577e-06	1.45172	1.81e-06	1.45172	1.48834e-06
1.45416	6.9397e-06	1.45416	6.71681e-06	1.45416	1.82281e-06	1.45416	1.49811e-06
1.4566	7.00073e-06	1.4566	6.77479e-06	1.4566	1.83563e-06	1.4566	1.50696e-06
1.45905	7.05872e-06	1.45905	6.82972e-06	1.45905	1.84692e-06	1.45905	1.51459e-06
1.46149	7.1228e-06	1.46149	6.89381e-06	1.46149	1.85852e-06	1.46149	1.52222e-06
1.46393	7.18079e-06	1.46393	6.94874e-06	1.46393	1.86829e-06	1.46393	1.52924e-06
1.46637	7.24792e-06	1.46637	7.01283e-06	1.46637	1.88141e-06	1.46637	1.53778e-06
1.46881	7.30896e-06	1.46881	7.07386e-06	1.46881	1.8927e-06	1.46881	1.54602e-06
1.47125	7.3761e-06	1.47125	7.13184e-06	1.47125	1.90582e-06	1.47125	1.55457e-06
1.47369	7.44019e-06	1.47369	7.19593e-06	1.47369	1.91833e-06	1.47369	1.56464e-06
1.47614	7.50732e-06	1.47614	7.26002e-06	1.47614	1.93237e-06	1.47614	1.57379e-06
1.47858	7.57141e-06	1.47858	7.32105e-06	1.47858	1.94672e-06	1.47858	1.58234e-06
1.48102	7.63855e-06	1.48102	7.38819e-06	1.48102	1.96106e-06	1.48102	1.59424e-06
1.48346	7.70264e-06	1.48346	7.45228e-06	1.48346	1.9751e-06	1.48346	1.60339e-06
1.4859	7.76978e-06	1.4859	7.51942e-06	1.4859	1.98761e-06	1.4859	1.61346e-06
1.48834	7.83386e-06	1.48834	7.58351e-06	1.48834	2.00134e-06	1.48834	1.62415e-06
1.49078	7.90405e-06	1.49078	7.6537e-06	1.49078	2.01294e-06	1.49078	1.63269e-06
1.49323	7.97119e-06	1.49323	7.72083e-06	1.49323	2.02545e-06	1.49323	1.64154e-06
1.49567	8.04443e-06	1.49567	7.79408e-06	1.49567	2.03979e-06	1.49567	1.6507e-06
1.49811	8.11157e-06	1.49811	7.86122e-06	1.49811	2.05292e-06	1.49811	1.65833e-06
1.50055	8.18481e-06	1.50055	7.93751e-06	1.50055	2.06696e-06	1.50055	1.67053e-06

## Sheet: Figure 3 (d)
0.79588	-2.42224e-06	0.78788	3.76677e-06	0.80088	2.91803e-06	0.79188	3.1684e-06
0.80588	-2.15368e-06	0.79788	2.54302e-06	0.81088	1.87738e-06	0.80188	2.60688e-06
0.81588	-1.9248e-06	0.80788	1.92656e-06	0.82088	1.32502e-06	0.81188	2.29255e-06
0.82588	-1.78747e-06	0.81788	1.49016e-06	0.83088	9.71012e-07	0.82188	2.11249e-06
0.83588	-1.63488e-06	0.82788	1.21855e-06	0.84088	7.14665e-07	0.83188	1.95075e-06
0.84588	-1.56042e-06	0.83788	9.62818e-07	0.85088	5.20878e-07	0.84188	1.82685e-06
0.85588	-1.44262e-06	0.84788	8.09314e-07	0.86088	3.70121e-07	0.85188	1.70905e-06
0.86588	-1.38647e-06	0.85788	6.40552e-07	0.87088	2.50797e-07	0.86188	1.63581e-06
0.87588	-1.29125e-06	0.86788	5.47473e-07	0.88088	1.53751e-07	0.87188	1.54883e-06
0.88588	-1.25555e-06	0.87788	4.18079e-07	0.89088	7.04385e-08	0.88188	1.48933e-06
0.89588	-1.04742e-06	0.88788	4.97425e-07	0.90088	1.32389e-07	0.89188	1.54609e-06
0.90588	-1.023e-06	0.89788	3.97937e-07	0.91088	7.34902e-08	0.90188	1.50611e-06
0.91588	-9.55256e-07	0.90788	3.54602e-07	0.92088	1.82534e-08	0.91188	1.43439e-06
0.92588	-9.39082e-07	0.91788	2.7312e-07	0.93088	-2.56919e-08	0.92188	1.39838e-06
0.93588	-8.78046e-07	0.92788	2.41382e-07	0.94088	-7.66562e-08	0.93188	1.33674e-06
0.94588	-8.67976e-07	0.93788	1.67835e-07	0.95088	-1.12972e-07	0.94188	1.30378e-06
0.95588	-8.13654e-07	0.94788	1.5044e-07	0.96088	-1.48373e-07	0.95188	1.24763e-06
0.96588	-8.09687e-07	0.95788	8.87942e-08	0.97088	-1.77975e-07	0.96188	1.22169e-06
0.97588	-7.60859e-07	0.96788	7.1094e-08	0.98088	-2.11849e-07	0.97188	1.16828e-06
0.98588	-7.59638e-07	0.97788	1.40261e-08	0.99088	-2.32906e-07	0.98188	1.15028e-06
0.99588	-7.14777e-07	0.98788	7.31224e-09	1.00088	-2.66781e-07	0.99188	1.09992e-06
1.00588	-7.1844e-07	0.99788	-4.42625e-08	1.01088	-2.80819e-07	1.00188	1.07856e-06
1.01588	-6.7541e-07	1.00788	-4.67039e-08	1.02088	-3.08285e-07	1.01188	1.03278e-06
1.02588	-6.80903e-07	1.01788	-9.40061e-08	1.03088	-3.22628e-07	1.02188	1.0163e-06
1.03588	-6.40925e-07	1.02788	-9.82786e-08	1.04088	-3.43075e-07	1.03188	9.72968e-07
1.04588	-6.47944e-07	1.03788	-1.40393e-07	1.05088	-3.57723e-07	1.04188	9.59235e-07
1.05588	-6.1236e-07	1.04788	-1.35815e-07	1.06088	-3.76339e-07	1.05188	9.14069e-07
1.06588	-6.21455e-07	1.05788	-1.80066e-07	1.07088	-3.8702e-07	1.06188	9.04914e-07
1.07588	-5.86756e-07	1.06788	-1.76404e-07	1.08088	-4.035e-07	1.07188	8.61579e-07
1.08588	-5.97071e-07	1.07788	-2.13635e-07	1.09088	-4.14181e-07	1.08188	8.5456e-07
1.09588	-5.63014e-07	1.08788	-2.06616e-07	1.10088	-4.30355e-07	1.09188	8.16108e-07
1.10588	-5.75739e-07	1.09788	-2.4751e-07	1.11088	-4.42257e-07	1.10188	8.08173e-07
1.11588	-5.43025e-07	1.10788	-2.38354e-07	1.12088	-4.58431e-07	1.11188	7.69416e-07
1.12588	-5.55994e-07	1.11788	-2.76501e-07	1.13088	-4.63619e-07	1.12188	7.63312e-07
1.13588	-5.24836e-07	1.12788	-2.68261e-07	1.14088	-4.77962e-07	1.13188	7.24555e-07
1.14588	-5.38599e-07	1.13788	-3.02746e-07	1.15088	-4.84066e-07	1.14188	7.19062e-07
1.15588	-5.08326e-07	1.14788	-2.94812e-07	1.16088	-4.94747e-07	1.15188	6.83966e-07
1.16588	-5.22212e-07	1.15788	-3.27771e-07	1.17088	-5.01156e-07	1.16188	6.80915e-07
1.17588	-4.93159e-07	1.16788	-3.14038e-07	1.18088	-5.13363e-07	1.17188	6.44294e-07
1.18588	-5.08509e-07	1.17788	-3.48218e-07	1.19088	-5.18246e-07	1.18188	6.41547e-07
1.19588	-4.80006e-07	1.18788	-3.36316e-07	1.20088	-5.32589e-07	1.19188	6.06452e-07
1.20588	-4.95722e-07	1.19788	-3.69275e-07	1.21088	-5.28927e-07	1.20188	6.02179e-07
1.21588	-4.67646e-07	1.20788	-3.54931e-07	1.22088	-5.48153e-07	1.21188	5.71051e-07
1.22588	-4.84461e-07	1.21788	-3.91247e-07	1.23088	-5.46932e-07	1.22188	5.69831e-07
1.23588	-4.56568e-07	1.22788	-3.78125e-07	1.24088	-5.57003e-07	1.23188	5.39008e-07
1.24588	-4.73963e-07	1.23788	-4.08032e-07	1.25088	-5.59444e-07	1.24188	5.34125e-07
1.25588	-4.46833e-07	1.24788	-3.95215e-07	1.26088	-5.73788e-07	1.25188	5.05439e-07
1.26588	-4.63984e-07	1.25788	-4.23291e-07	1.27088	-5.73177e-07	1.26188	5.03302e-07
1.27588	-4.36976e-07	1.26788	-4.08642e-07	1.28088	-5.82333e-07	1.27188	4.70649e-07
1.28588	-4.54554e-07	1.27788	-4.38855e-07	1.29088	-5.85079e-07	1.28188	4.71869e-07
1.29588	-4.28828e-07	1.28788	-4.2268e-07	1.30088	-5.94845e-07	1.29188	4.41962e-07
1.30588	-4.47047e-07	1.29788	-4.54114e-07	1.31088	-5.92708e-07	1.30188	4.45929e-07
1.31588	-4.20985e-07	1.30788	-4.36719e-07	1.32088	-6.02779e-07	1.31188	4.15717e-07
1.32588	-4.3896e-07	1.31788	-4.66015e-07	1.33088	-6.03084e-07	1.32188	4.17243e-07
1.33588	-4.13752e-07	1.32788	-4.46179e-07	1.34088	-6.14986e-07	1.33188	3.87946e-07
1.34588	-4.3191e-07	1.33788	-4.7456e-07	1.35088	-6.10714e-07	1.34188	3.89472e-07
1.35588	-4.07282e-07	1.34788	-4.63879e-07	1.36088	-6.2109e-07	1.35188	3.59565e-07
1.36588	-4.25898e-07	1.35788	-4.89209e-07	1.37088	-6.22921e-07	1.36188	3.61396e-07
1.37588	-4.01087e-07	1.36788	-4.72729e-07	1.38088	-6.32076e-07	1.37188	3.3393e-07
1.38588	-4.1955e-07	1.37788	-5.00195e-07	1.39088	-6.26583e-07	1.38188	3.36371e-07
1.39588	-3.94892e-07	1.38788	-4.8341e-07	1.40088	-6.3879e-07	1.39188	3.08905e-07
1.40588	-4.13722e-07	1.39788	-5.12097e-07	1.41088	-6.35738e-07	1.40188	3.12262e-07
1.41588	-3.89521e-07	1.40788	-4.96838e-07	1.42088	-6.47945e-07	1.41188	2.83881e-07
1.42588	-4.08381e-07	1.41788	-5.25219e-07	1.43088	-6.43062e-07	1.42188	2.91205e-07
1.43588	-3.85188e-07	1.42788	-5.08435e-07	1.44088	-6.5527e-07	1.43188	2.6435e-07
1.44588	-4.03376e-07	1.43788	-5.31628e-07	1.45088	-6.46725e-07	1.44188	2.67707e-07
1.45588	-3.80335e-07	1.44788	-5.10571e-07	1.46088	-6.60763e-07	1.45188	2.41767e-07
1.46588	-3.98707e-07	1.45788	-5.40478e-07	1.47088	-6.60152e-07	1.46188	2.47565e-07
1.47588	-3.76215e-07	1.46788	-5.20642e-07	1.48088	-6.66256e-07	1.47188	2.21015e-07
1.48588	-3.94831e-07	1.47788	-5.48413e-07	1.49088	-6.6473e-07	1.48188	2.25898e-07
1.49588	-3.71607e-07	1.48788	-5.33459e-07	1.50088	-6.75716e-07	1.49188	1.98127e-07
1.50588	-3.89552e-07	1.49788	-5.56653e-07	1.51088	-6.65951e-07	1.50188	2.06061e-07
1.51588	-3.66511e-07	1.50788	-5.39258e-07	1.52088	-6.78158e-07	1.51188	1.80121e-07
1.52588	-3.85981e-07	1.51788	-5.66418e-07	1.53088	-6.74496e-07	1.52188	1.8592e-07
1.53588	-3.6294e-07	1.52788	-5.47803e-07	1.54088	-6.8243e-07	1.53188	1.5998e-07
1.54588	-3.8238e-07	1.53788	-5.72522e-07	1.55088	-6.79073e-07	1.54188	1.66999e-07
1.55588	-3.60468e-07	1.54788	-5.53296e-07	1.56088	-6.9006e-07	1.55188	1.40754e-07
1.56588	-3.79054e-07	1.55788	-5.7893e-07	1.57088	-6.87618e-07	1.56188	1.50824e-07
1.57588	-3.56379e-07	1.56788	-5.6062e-07	1.58088	-6.95553e-07	1.57188	1.24274e-07
1.58588	-3.75544e-07	1.57788	-5.88086e-07	1.59088	-6.91585e-07	1.58188	1.29767e-07
1.59588	-3.53388e-07	1.58788	-5.68249e-07	1.60088	-7.00741e-07	1.59188	1.04132e-07
1.60588	-3.72431e-07	1.59788	-5.948e-07	1.61088	-6.93111e-07	1.60188	1.15119e-07
1.61588	-3.50947e-07	1.60788	-5.72217e-07	1.62088	-7.03792e-07	1.61188	8.73478e-08
1.62588	-3.68647e-07	1.61788	-6.00598e-07	1.63088	-7.0013e-07	1.62188	9.71134e-08
1.63588	-3.47437e-07	1.62788	-5.82898e-07	1.64088	-7.12032e-07	1.63188	7.14786e-08
1.64588	-3.66053e-07	1.63788	-6.0365e-07	1.65088	-7.00436e-07	1.64188	7.9108e-08
1.65588	-3.45057e-07	1.64788	-5.85949e-07	1.66088	-7.16915e-07	1.65188	5.6525e-08
1.66588	-3.6294e-07	1.65788	-6.10058e-07	1.67088	-7.08065e-07	1.66188	6.26285e-08
1.67588	-3.42829e-07	1.66788	-5.91137e-07	1.68088	-7.17525e-07	1.67188	4.00455e-08
1.68588	-3.60865e-07	1.67788	-6.15857e-07	1.69088	-7.10506e-07	1.68188	5.01163e-08
1.69588	-3.39503e-07	1.68788	-5.98462e-07	1.70088	-7.21798e-07	1.69188	2.44816e-08
1.70588	-3.576e-07	1.69788	-6.23486e-07	1.71088	-7.18441e-07	1.70188	3.54679e-08
1.71588	-3.37153e-07	1.70788	-6.04565e-07	1.72088	-7.27901e-07	1.71188	1.04435e-08
1.72588	-3.55372e-07	1.71788	-6.28064e-07	1.73088	-7.20577e-07	1.72188	2.1735e-08
1.73588	-3.35261e-07	1.72788	-6.08532e-07	1.74088	-7.29122e-07	1.73188	-2.67909e-09
1.74588	-3.52992e-07	1.73788	-6.34167e-07	1.75088	-7.20577e-07	1.74188	6.78136e-09
1.75588	-3.3346e-07	1.74788	-6.12805e-07	1.76088	-7.33395e-07	1.75188	-1.73275e-08
1.76588	-3.50672e-07	1.75788	-6.36914e-07	1.77088	-7.25155e-07	1.76188	-6.3412e-09
1.77588	-3.3111e-07	1.76788	-6.19214e-07	1.78088	-7.37972e-07	1.77188	-3.16708e-08
1.78588	-3.48475e-07	1.77788	-6.41491e-07	1.79088	-7.2607e-07	1.78188	-1.94638e-08
1.79588	-3.28486e-07	1.78788	-6.20129e-07	1.80088	-7.42245e-07	1.79188	-4.26571e-08
1.80588	-3.46095e-07	1.79788	-6.479e-07	1.81088	-7.29122e-07	1.80188	-3.28915e-08
1.81588	-3.2638e-07	1.80788	-6.28064e-07	1.82088	-7.4316e-07	1.81188	-5.82211e-08
1.82588	-3.44019e-07	1.81788	-6.53088e-07	1.83088	-7.337e-07	1.82188	-4.66244e-08
1.83588	-3.25037e-07	1.82788	-6.32031e-07	1.84088	-7.44076e-07	1.83188	-7.01229e-08
1.84588	-3.42066e-07	1.83788	-6.53393e-07	1.85088	-7.35531e-07	1.84188	-5.51693e-08
1.85588	-3.23634e-07	1.84788	-6.32641e-07	1.86088	-7.48348e-07	1.85188	-7.8973e-08
1.86588	-3.399e-07	1.85788	-6.58276e-07	1.87088	-7.40108e-07	1.86188	-7.10385e-08
1.87588	-3.22199e-07	1.86788	-6.39966e-07	1.88088	-7.45907e-07	1.87188	-8.7518e-08
1.88588	-3.38191e-07	1.87788	-6.60718e-07	1.89088	-7.41634e-07	1.88188	-8.01937e-08
1.89588	-3.20368e-07	1.88788	-6.44543e-07	1.90088	-7.55672e-07	1.89188	-1.02472e-07
1.90588	-3.36512e-07	1.89788	-6.656e-07	1.91088	-7.45296e-07	1.90188	-9.17904e-08
1.91588	-3.1869e-07	1.90788	-6.44848e-07	1.92088	-7.57809e-07	1.91188	-1.16815e-07
1.92588	-3.34895e-07	1.91788	-6.70178e-07	1.93088	-7.43465e-07	1.92188	-1.03387e-07
1.93588	-3.17133e-07	1.92788	-6.53393e-07	1.94088	-7.64217e-07	1.93188	-1.2597e-07
1.94588	-3.32362e-07	1.93788	-6.72314e-07	1.95088	-7.51095e-07	1.94188	-1.11932e-07
1.95588	-3.16157e-07	1.94788	-6.5675e-07	1.96088	-7.64828e-07	1.95188	-1.34515e-07
1.96588	-3.31049e-07	1.95788	-6.76892e-07	1.97088	-7.50484e-07	1.96188	-1.21392e-07
1.97588	-3.14265e-07	1.96788	-6.58581e-07	1.98088	-7.62386e-07	1.97188	-1.44281e-07
1.98588	-3.29768e-07	1.97788	-6.80554e-07	1.99088	-7.5079e-07	1.98188	-1.32074e-07
1.99588	-3.13441e-07	1.98788	-6.61023e-07	2.00088	-7.65438e-07	1.99188	-1.55267e-07
2.00588	-3.27845e-07	1.99788	-6.8208e-07	2.01088	-7.54146e-07	2.00188	-1.4367e-07
2.01588	-3.12464e-07	2.00788	-6.65295e-07	2.02088	-7.67879e-07	2.01188	-1.63507e-07
2.02588	-3.26777e-07	2.01788	-6.86047e-07	2.03088	-7.57198e-07	2.02188	-1.50079e-07
2.03588	-3.10633e-07	2.02788	-6.65906e-07	2.04088	-7.72152e-07	2.03188	-1.71746e-07
2.04588	-3.24732e-07	2.03788	-6.89404e-07	2.05088	-7.55978e-07	2.04188	-1.62591e-07
2.05588	-3.09077e-07	2.04788	-6.7323e-07	2.06088	-7.72762e-07	2.05188	-1.83343e-07
2.06588	-3.22382e-07	2.05788	-6.92456e-07	2.07088	-7.59945e-07	2.06188	-1.71441e-07
2.07588	-3.08222e-07	2.06788	-6.7445e-07	2.08088	-7.71541e-07	2.07188	-1.89141e-07
2.08588	-3.21284e-07	2.07788	-6.95508e-07	2.09088	-7.61471e-07	2.08188	-1.79376e-07
2.09588	-3.06483e-07	2.08788	-6.77197e-07	2.10088	-7.75814e-07	2.09188	-1.98907e-07
2.10588	-3.20551e-07	2.09788	-6.9978e-07	2.11088	-7.64522e-07	2.10188	-1.85785e-07
2.11588	-3.05323e-07	2.10788	-6.79638e-07	2.12088	-7.76424e-07	2.11188	-2.07147e-07
2.12588	-3.19331e-07	2.11788	-7.02221e-07	2.13088	-7.66048e-07	2.12188	-1.9555e-07
2.13588	-3.04347e-07	2.12788	-6.80554e-07	2.14088	-7.81307e-07	2.13188	-2.15692e-07
2.14588	-3.17957e-07	2.13788	-7.05273e-07	2.15088	-7.67269e-07	2.14188	-2.02569e-07
2.15588	-3.03187e-07	2.14788	-6.8269e-07	2.16088	-7.81002e-07	2.15188	-2.23626e-07
2.16588	-3.17133e-07	2.15788	-7.06494e-07	2.17088	-7.69405e-07	2.16188	-2.08062e-07
2.17588	-3.02119e-07	2.16788	-6.86047e-07	2.18088	-7.82833e-07	2.17188	-2.2973e-07
2.18588	-3.15455e-07	2.17788	-7.0924e-07	2.19088	-7.68795e-07	2.18188	-2.19964e-07
2.19588	-3.0099e-07	2.18788	-6.90014e-07	2.20088	-7.82528e-07	2.19188	-2.3797e-07
2.20588	-3.14021e-07	2.19788	-7.0924e-07	2.21088	-7.70321e-07	2.20188	-2.26068e-07
2.21588	-2.99616e-07	2.20788	-6.96118e-07	2.22088	-7.84664e-07	2.21188	-2.47735e-07
2.22588	-3.13471e-07	2.21788	-7.1687e-07	2.23088	-7.74593e-07	2.22188	-2.33087e-07
2.23588	-2.98731e-07	2.22788	-6.96423e-07	2.24088	-7.87411e-07	2.23188	-2.52313e-07
2.24588	-3.10999e-07	2.23788	-7.14123e-07	2.25088	-7.74593e-07	2.24188	-2.39801e-07
2.25588	-2.9806e-07	2.24788	-6.98254e-07	2.26088	-7.90768e-07	2.25188	-2.60858e-07
2.26588	-3.1106e-07	2.25788	-7.20227e-07	2.27088	-7.78255e-07	2.26188	-2.46515e-07
2.27588	-2.97236e-07	2.26788	-7.0039e-07	2.28088	-7.92293e-07	2.27188	-2.68182e-07
2.28588	-3.10297e-07	2.27788	-7.19006e-07	2.29088	-7.7795e-07	2.28188	-2.54449e-07
2.29588	-2.95985e-07	2.28788	-7.02832e-07	2.30088	-7.95345e-07	2.29188	-2.74591e-07
2.30588	-3.0865e-07	2.29788	-7.22668e-07	2.31088	-7.77035e-07	2.30188	-2.59027e-07
2.31588	-2.94611e-07	2.30788	-7.06189e-07	2.32088	-7.92599e-07	2.31188	-2.8161e-07
2.32588	-3.07765e-07	2.31788	-7.23279e-07	2.33088	-7.84969e-07	2.32188	-2.68182e-07
2.33588	-2.94276e-07	2.32788	-7.07715e-07	2.34088	-7.9565e-07	2.33188	-2.84356e-07
2.34588	-3.05445e-07	2.33788	-7.26941e-07	2.35088	-7.78255e-07	2.34188	-2.76117e-07
2.35588	-2.93757e-07	2.34788	-7.11072e-07	2.36088	-7.96261e-07	2.35188	-2.94427e-07
2.36588	-3.04804e-07	2.35788	-7.30908e-07	2.37088	-7.81307e-07	2.36188	-2.8222e-07
2.37588	-2.93208e-07	2.36788	-7.14123e-07	2.38088	-7.98702e-07	2.37188	-3.00225e-07
2.38588	-3.03858e-07	2.37788	-7.32434e-07	2.39088	-7.83138e-07	2.38188	-2.84356e-07
2.39588	-2.91804e-07	2.38788	-7.15954e-07	2.40088	-7.98397e-07	2.39188	-3.06329e-07
2.40588	-3.03309e-07	2.39788	-7.33044e-07	2.41088	-7.84359e-07	2.40188	-2.9046e-07
2.41588	-2.91224e-07	2.40788	-7.15344e-07	2.42088	-7.99312e-07	2.41188	-3.09991e-07
2.42588	-3.02088e-07	2.41788	-7.30603e-07	2.43088	-7.84054e-07	2.42188	-2.95648e-07
2.43588	-2.8979e-07	2.42788	-7.19311e-07	2.44088	-8.0389e-07	2.43188	-3.20062e-07
2.44588	-3.01692e-07	2.43788	-7.3518e-07	2.45088	-7.90462e-07	2.44188	-3.02362e-07
2.45588	-2.90125e-07	2.44788	-7.1748e-07	2.46088	-8.04806e-07	2.45188	-3.21588e-07
2.46588	-3.00837e-07	2.45788	-7.38843e-07	2.47088	-7.88631e-07	2.46188	-3.08465e-07
2.47588	-2.88752e-07	2.46788	-7.19311e-07	2.48088	-8.02975e-07	2.47188	-3.29217e-07
2.48588	-2.99464e-07	2.47788	-7.37622e-07	2.49088	-7.89547e-07	2.48188	-3.12738e-07
2.49588	-2.88447e-07	2.48788	-7.20837e-07	2.50088	-8.05111e-07	2.49188	-3.34405e-07
2.50588	-2.98731e-07	2.49788	-7.40368e-07	2.51088	-7.87411e-07	2.50188	-3.18231e-07
2.51588	-2.87653e-07	2.50788	-7.28772e-07	2.52088	-8.06026e-07	2.51188	-3.40204e-07
2.52588	-2.9806e-07	2.51788	-7.41284e-07	2.53088	-7.89852e-07	2.52188	-3.20977e-07
2.53588	-2.87043e-07	2.52788	-7.26941e-07	2.54088	-8.08163e-07	2.53188	-3.4295e-07
2.54588	-2.96381e-07	2.53788	-7.40979e-07	2.55088	-7.90768e-07	2.54188	-3.31048e-07
2.55588	-2.85609e-07	2.54788	-7.26025e-07	2.56088	-8.09994e-07	2.55188	-3.49969e-07
2.56588	-2.95496e-07	2.55788	-7.45862e-07	2.57088	-7.96566e-07	2.56188	-3.3471e-07
2.57588	-2.85243e-07	2.56788	-7.29992e-07	2.58088	-8.10299e-07	2.57188	-3.55462e-07
2.58588	-2.9571e-07	2.57788	-7.44336e-07	2.59088	-7.94735e-07	2.58188	-3.36847e-07
2.59588	-2.84815e-07	2.58788	-7.35486e-07	2.60088	-8.14571e-07	2.59188	-3.57599e-07
2.60588	-2.93848e-07	2.59788	-7.49219e-07	2.61088	-7.9443e-07	2.60188	-3.4295e-07
2.61588	-2.84083e-07	2.60788	-7.31213e-07	2.62088	-8.11825e-07	2.61188	-3.63702e-07
2.62588	-2.93086e-07	2.61788	-7.46777e-07	2.63088	-7.9443e-07	2.62188	-3.48443e-07
2.63588	-2.83106e-07	2.62788	-7.34265e-07	2.64088	-8.13351e-07	2.63188	-3.69195e-07
2.64588	-2.92689e-07	2.63788	-7.51355e-07	2.65088	-7.98092e-07	2.64188	-3.51495e-07
2.65588	-2.82526e-07	2.64788	-7.37927e-07	2.66088	-8.12435e-07	2.65188	-3.74383e-07
2.66588	-2.92048e-07	2.65788	-7.53796e-07	2.67088	-7.9565e-07	2.66188	-3.56683e-07
2.67588	-2.81947e-07	2.66788	-7.37622e-07	2.68088	-8.16708e-07	2.67188	-3.76825e-07
2.68588	-2.91285e-07	2.67788	-7.49829e-07	2.69088	-7.96566e-07	2.68188	-3.61261e-07
2.69588	-2.8213e-07	2.68788	-7.38537e-07	2.70088	-8.12435e-07	2.69188	-3.78656e-07
2.70588	-2.90156e-07	2.69788	-7.56238e-07	2.71088	-8.01144e-07	2.70188	-3.65533e-07
2.71588	-2.81092e-07	2.70788	-7.39148e-07	2.72088	-8.17013e-07	2.71188	-3.8537e-07
2.72588	-2.89088e-07	2.71788	-7.56543e-07	2.73088	-8.0328e-07	2.72188	-3.67974e-07
2.73588	-2.80879e-07	2.72788	-7.39758e-07	2.74088	-8.17318e-07	2.73188	-3.92389e-07
2.74588	-2.8863e-07	2.73788	-7.58984e-07	2.75088	-7.99007e-07	2.74188	-3.74383e-07
2.75588	-2.79963e-07	2.74788	-7.43725e-07	2.76088	-8.18844e-07	2.75188	-3.93914e-07
2.76588	-2.88599e-07	2.75788	-7.56238e-07	2.77088	-8.00228e-07	2.76188	-3.77435e-07
2.77588	-2.78895e-07	2.76788	-7.47082e-07	2.78088	-8.2098e-07	2.77188	-3.96051e-07
2.78588	-2.86799e-07	2.77788	-7.57153e-07	2.79088	-8.02364e-07	2.78188	-3.81097e-07
2.79588	-2.78559e-07	2.78788	-7.47387e-07	2.80088	-8.19149e-07	2.79188	-4.00628e-07
2.80588	-2.86311e-07	2.79788	-7.62036e-07	2.81088	-7.99312e-07	2.80188	-3.84454e-07
2.81588	-2.77796e-07	2.80788	-7.47082e-07	2.82088	-8.23116e-07	2.81188	-4.03375e-07
2.82588	-2.85578e-07	2.81788	-7.58984e-07	2.83088	-8.02975e-07	2.82188	-3.89337e-07
2.83588	-2.77247e-07	2.82788	-7.48608e-07	2.84088	-8.21285e-07	2.83188	-4.08563e-07
2.84588	-2.84785e-07	2.83788	-7.599e-07	2.85088	-8.00838e-07	2.84188	-3.90252e-07
2.85588	-2.76667e-07	2.84788	-7.52881e-07	2.86088	-8.23727e-07	2.85188	-4.11004e-07
2.86588	-2.84449e-07	2.85788	-7.62341e-07	2.87088	-8.06332e-07	2.86188	-3.9483e-07
2.87588	-2.75691e-07	2.86788	-7.50439e-07	2.88088	-8.23421e-07	2.87188	-4.16192e-07
2.88588	-2.83595e-07	2.87788	-7.64172e-07	2.89088	-8.0389e-07	2.88188	-4.01544e-07
2.89588	-2.75294e-07	2.88788	-7.54407e-07	2.90088	-8.27694e-07	2.89188	-4.2138e-07
2.90588	-2.8216e-07	2.89788	-7.65393e-07	2.91088	-8.06026e-07	2.90188	-4.00018e-07
2.91588	-2.74775e-07	2.90788	-7.54407e-07	2.92088	-8.21896e-07	2.91188	-4.2138e-07
2.92588	-2.82435e-07	2.91788	-7.6936e-07	2.93088	-8.0328e-07	2.92188	-4.06427e-07
2.93588	-2.74592e-07	2.92788	-7.54712e-07	2.94088	-8.25252e-07	2.93188	-4.25958e-07
2.94588	-2.81641e-07	2.93788	-7.66614e-07	2.95088	-8.09688e-07	2.94188	-4.09173e-07
2.95588	-2.74378e-07	2.94788	-7.58984e-07	2.96088	-8.26778e-07	2.95188	-4.25958e-07
2.96588	-2.81031e-07	2.95788	-7.69055e-07	2.97088	-8.07857e-07	2.96188	-4.08563e-07
2.97588	-2.74073e-07	2.96788	-7.57458e-07	2.98088	-8.25252e-07	2.97188	-4.33892e-07
2.98588	-2.80512e-07	2.97788	-7.68139e-07	2.99088	-8.06637e-07	2.98188	-4.13141e-07
2.99588	-2.73859e-07	2.98788	-7.56848e-07	3.00088	-8.27694e-07	2.99188	-4.34198e-07
3.00588	-2.79017e-07	2.99788	-7.70581e-07	3.01088	-8.06332e-07	3.00188	-4.14972e-07
3.01588	-2.73371e-07	3.00788	-7.62341e-07	3.02088	-8.26778e-07	3.01188	-4.40606e-07
3.02588	-2.78834e-07	3.01788	-7.71802e-07	3.03088	-8.07552e-07	3.02188	-4.21991e-07
3.03588	-2.72974e-07	3.02788	-7.62341e-07	3.04088	-8.30746e-07	3.03188	-4.40912e-07
3.04588	-2.77644e-07	3.03788	-7.6997e-07	3.05088	-8.09383e-07	3.04188	-4.23822e-07
3.05588	-2.72517e-07	3.04788	-7.64172e-07	3.06088	-8.30746e-07	3.05188	-4.44574e-07
3.06588	-2.77796e-07	3.05788	-7.73327e-07	3.07088	-8.10604e-07	3.06188	-4.25042e-07
3.07588	-2.72089e-07	3.06788	-7.64782e-07	3.08088	-8.33187e-07	3.07188	-4.49762e-07
3.08588	-2.76209e-07	3.07788	-7.76074e-07	3.09088	-8.1274e-07	3.08188	-4.2901e-07
3.09588	-2.71388e-07	3.08788	-7.63867e-07	3.10088	-8.31661e-07	3.09188	-4.49151e-07
3.10588	-2.75935e-07	3.09788	-7.73938e-07	3.11088	-8.09994e-07	3.10188	-4.32367e-07
3.11588	-2.7093e-07	3.10788	-7.66308e-07	3.12088	-8.34408e-07	3.11188	-4.49762e-07
3.12588	-2.74958e-07	3.11788	-7.76684e-07	3.13088	-8.1152e-07	3.12188	-4.35113e-07
3.13588	-2.70838e-07	3.12788	-7.67529e-07	3.14088	-8.29525e-07	3.13188	-4.56475e-07
3.14588	-2.74378e-07	3.13788	-7.7699e-07	3.15088	-8.08163e-07	3.14188	-4.39996e-07
3.15588	-2.70655e-07	3.14788	-7.66919e-07	3.16088	-8.34103e-07	3.15188	-4.58612e-07
3.16588	-2.74073e-07	3.15788	-7.81567e-07	3.17088	-8.10299e-07	3.16188	-4.41217e-07
3.17588	-2.70014e-07	3.16788	-7.64782e-07	3.18088	-8.33492e-07	3.17188	-4.60138e-07
3.18588	-2.73371e-07	3.17788	-7.81567e-07	3.19088	-8.12435e-07	3.18188	-4.43658e-07
3.19588	-2.69831e-07	3.18788	-7.69665e-07	3.20088	-8.34103e-07	3.19188	-4.61663e-07
3.20588	-2.72486e-07	3.19788	-7.81567e-07	3.21088	-8.13961e-07	3.20188	-4.44574e-07
3.21588	-2.69587e-07	3.20788	-7.71191e-07	3.22088	-8.34713e-07	3.21188	-4.65326e-07
3.22588	-2.7151e-07	3.21788	-7.81262e-07	3.23088	-8.15182e-07	3.22188	-4.47625e-07
3.23588	-2.69526e-07	3.22788	-7.69055e-07	3.24088	-8.33187e-07	3.23188	-4.68683e-07
3.24588	-2.71021e-07	3.23788	-7.79736e-07	3.25088	-8.15792e-07	3.24188	-4.50067e-07
3.25588	-2.68153e-07	3.24788	-7.71496e-07	3.26088	-8.3807e-07	3.25188	-4.72345e-07
3.26588	-2.7096e-07	3.25788	-7.83093e-07	3.27088	-8.15182e-07	3.26188	-4.51593e-07
3.27588	-2.68702e-07	3.26788	-7.74243e-07	3.28088	-8.35934e-07	3.27188	-4.75702e-07
3.28588	-2.69373e-07	3.27788	-7.84314e-07	3.29088	-8.14571e-07	3.28188	-4.55865e-07
3.29588	-2.68366e-07	3.28788	-7.75464e-07	3.30088	-8.37154e-07	3.29188	-4.77227e-07
3.30588	-2.68977e-07	3.29788	-7.86755e-07	3.31088	-8.17623e-07	3.30188	-4.56781e-07
3.31588	-2.67848e-07	3.30788	-7.76379e-07	3.32088	-8.36849e-07	3.31188	-4.79974e-07
3.32588	-2.69129e-07	3.31788	-7.84619e-07	3.33088	-8.18539e-07	3.32188	-4.61053e-07
3.33588	-2.68641e-07	3.32788	-7.74548e-07	3.34088	-8.39596e-07	3.33188	-4.83026e-07
3.34588	-2.68458e-07	3.33788	-7.8706e-07	3.35088	-8.14266e-07	3.34188	-4.6441e-07
3.35588	-2.67451e-07	3.34788	-7.76074e-07	3.36088	-8.39901e-07	3.35188	-4.82415e-07
3.36588	-2.67817e-07	3.35788	-7.83703e-07	3.37088	-8.18539e-07	3.36188	-4.65631e-07
3.37588	-2.67115e-07	3.36788	-7.79431e-07	3.38088	-8.44173e-07	3.37188	-4.84857e-07
3.38588	-2.66932e-07	3.37788	-7.86755e-07	3.39088	-8.19454e-07	3.38188	-4.62884e-07
3.39588	-2.66444e-07	3.38788	-7.80041e-07	3.40088	-8.41732e-07	3.39188	-4.8974e-07
3.40588	-2.66688e-07	3.39788	-7.92248e-07	3.41088	-8.17928e-07	3.40188	-4.67767e-07
3.41588	-2.66016e-07	3.40788	-7.80041e-07	3.42088	-8.39901e-07	3.41188	-4.91266e-07
3.42588	-2.65925e-07	3.41788	-7.89807e-07	3.43088	-8.15487e-07	3.42188	-4.71429e-07
3.43588	-2.66383e-07	3.42788	-7.81262e-07	3.44088	-8.42037e-07	3.43188	-4.95233e-07
3.44588	-2.65559e-07	3.43788	-7.87976e-07	3.45088	-8.17318e-07	3.44188	-4.75396e-07
3.45588	-2.66779e-07	3.44788	-7.81872e-07	3.46088	-8.42037e-07	3.45188	-4.96148e-07
3.46588	-2.64613e-07	3.45788	-7.88281e-07	3.47088	-8.15792e-07	3.46188	-4.77838e-07
3.47588	-2.65772e-07	3.46788	-7.82178e-07	3.48088	-8.45089e-07	3.47188	-4.97979e-07
3.48588	-2.64674e-07	3.47788	-7.92553e-07	3.49088	-8.16708e-07	3.48188	-4.79974e-07
3.49588	-2.65284e-07	3.48788	-7.81567e-07	3.50088	-8.41122e-07	3.49188	-4.99505e-07
3.50588	-2.6446e-07	3.49788	-7.90417e-07	3.51088	-8.16708e-07	3.50188	-4.78753e-07
3.51588	-2.64674e-07	3.50788	-7.84314e-07	3.52088	-8.39901e-07	3.51188	-5.01947e-07
3.52588	-2.63667e-07	3.51788	-7.91333e-07	3.53088	-8.2037e-07	3.52188	-4.83636e-07
3.53588	-2.65162e-07	3.52788	-7.84009e-07	3.54088	-8.45394e-07	3.53188	-5.04998e-07
3.54588	-2.62812e-07	3.53788	-7.90112e-07	3.55088	-8.2098e-07	3.54188	-4.83331e-07
3.55588	-2.65254e-07	3.54788	-7.84924e-07	3.56088	-8.42647e-07	3.55188	-5.07745e-07
3.56588	-2.62629e-07	3.55788	-7.92553e-07	3.57088	-8.19759e-07	3.56188	-4.87909e-07
3.57588	-2.65009e-07	3.56788	-7.85534e-07	3.58088	-8.42342e-07	3.57188	-5.10186e-07
3.58588	-2.61713e-07	3.57788	-7.92859e-07	3.59088	-8.20064e-07	3.58188	-4.9035e-07
3.59588	-2.6446e-07	3.58788	-7.88281e-07	3.60088	-8.4631e-07	3.59188	-5.14154e-07
3.60588	-2.61286e-07	3.59788	-7.94385e-07	3.61088	-8.24947e-07	3.60188	-4.93097e-07
3.61588	-2.6443e-07	3.60788	-7.91333e-07	3.62088	-8.43563e-07	3.61188	-5.12323e-07
3.62588	-2.61073e-07	3.61788	-7.94995e-07	3.63088	-8.16097e-07	3.62188	-4.94317e-07
3.63588	-2.64216e-07	3.62788	-7.8706e-07	3.64088	-8.45699e-07	3.63188	-5.16595e-07
3.64588	-2.59669e-07	3.63788	-7.98047e-07	3.65088	-8.23116e-07	3.64188	-4.96454e-07
3.65588	-2.64613e-07	3.64788	-7.87976e-07	3.66088	-8.44784e-07	3.65188	-5.15374e-07
3.66588	-2.59455e-07	3.65788	-7.9591e-07	3.67088	-8.22506e-07	3.66188	-4.98285e-07
3.67588	-2.62904e-07	3.66788	-7.89197e-07	3.68088	-8.42647e-07	3.67188	-5.18731e-07
3.68588	-2.59364e-07	3.67788	-7.98962e-07	3.69088	-8.22506e-07	3.68188	-5.02252e-07
3.69588	-2.64216e-07	3.68788	-7.96216e-07	3.70088	-8.47225e-07	3.69188	-5.21478e-07
3.70588	-2.58723e-07	3.69788	-7.9591e-07	3.71088	-8.21896e-07	3.70188	-5.01641e-07
3.71588	-2.63514e-07	3.70788	-7.90112e-07	3.72088	-8.4631e-07	3.71188	-5.21783e-07
3.72588	-2.57838e-07	3.71788	-7.98657e-07	3.73088	-8.2037e-07	3.72188	-5.05914e-07
3.73588	-2.63087e-07	3.72788	-7.95605e-07	3.74088	-8.48751e-07	3.73188	-5.2453e-07
3.74588	-2.58021e-07	3.73788	-7.97131e-07	3.75088	-8.23727e-07	3.74188	-5.05609e-07
3.75588	-2.6266e-07	3.74788	-7.88281e-07	3.76088	-8.49972e-07	3.75188	-5.26971e-07
3.76588	-2.57166e-07	3.75788	-7.97741e-07	3.77088	-8.24032e-07	3.76188	-5.0805e-07
3.77588	-2.62721e-07	3.76788	-7.89807e-07	3.78088	-8.47225e-07	3.77188	-5.27581e-07
3.78588	-2.568e-07	3.77788	-7.98657e-07	3.79088	-8.24947e-07	3.78188	-5.10186e-07
3.79588	-2.6266e-07	3.78788	-7.91943e-07	3.80088	-8.45089e-07	3.79188	-5.30023e-07
3.80588	-2.56464e-07	3.79788	-8.03235e-07	3.81088	-8.16402e-07	3.80188	-5.12933e-07
3.81588	-2.61897e-07	3.80788	-7.9591e-07	3.82088	-8.49972e-07	3.81188	-5.31549e-07
3.82588	-2.55793e-07	3.81788	-7.98962e-07	3.83088	-8.25558e-07	3.82188	-5.17205e-07
3.83588	-2.62385e-07	3.82788	-7.91638e-07	3.84088	-8.52413e-07	3.83188	-5.31549e-07
3.84588	-2.54878e-07	3.83788	-8.01404e-07	3.85088	-8.24337e-07	3.84188	-5.13238e-07
3.85588	-2.61805e-07	3.84788	-7.96521e-07	3.86088	-8.49056e-07	3.85188	-5.37652e-07
3.86588	-2.54267e-07	3.85788	-8.01098e-07	3.87088	-8.26168e-07	3.86188	-5.15985e-07
3.87588	-2.615e-07	3.86788	-7.93164e-07	3.88088	-8.47225e-07	3.87188	-5.39178e-07
3.88588	-2.53962e-07	3.87788	-8.00183e-07	3.89088	-8.28304e-07	3.88188	-5.17511e-07
3.89588	-2.61836e-07	3.88788	-7.93469e-07	3.90088	-8.49056e-07	3.89188	-5.37652e-07
3.90588	-2.53718e-07	3.89788	-8.01709e-07	3.91088	-8.27389e-07	3.90188	-5.20257e-07
3.91588	-2.61713e-07	3.90788	-8.00793e-07	3.92088	-8.50582e-07	3.91188	-5.40094e-07
3.92588	-2.52894e-07	3.91788	-8.01404e-07	3.93088	-8.25863e-07	3.92188	-5.20257e-07
3.93588	-2.61134e-07	3.92788	-7.98047e-07	3.94088	-8.48141e-07	3.93188	-5.4284e-07
3.94588	-2.52467e-07	3.93788	-8.05066e-07	3.95088	-8.24947e-07	3.94188	-5.21783e-07
3.95588	-2.60737e-07	3.94788	-7.96826e-07	3.96088	-8.50277e-07	3.95188	-5.44671e-07
3.96588	-2.52192e-07	3.95788	-8.08423e-07	3.97088	-8.24032e-07	3.96188	-5.24224e-07
3.97588	-2.61317e-07	3.96788	-7.96216e-07	3.98088	-8.49056e-07	3.97188	-5.45892e-07
3.98588	-2.51338e-07	3.97788	-8.03235e-07	3.99088	-8.24337e-07	3.98188	-5.23614e-07
3.99588	-2.61134e-07	3.98788	-7.99573e-07	4.00088	-8.50582e-07	3.99188	-5.47113e-07
4.00588	-2.51185e-07	3.99788	-8.0354e-07	4.01088	-8.27999e-07	4.00188	-5.30023e-07
4.01588	-2.60096e-07	4.00788	-7.98657e-07	4.02088	-8.49056e-07	4.01188	-5.47723e-07
4.02588	-2.50727e-07	4.01788	-8.0354e-07	4.03088	-8.28304e-07	4.02188	-5.29412e-07
4.03588	-2.60432e-07	4.02788	-8.02624e-07	4.04088	-8.50277e-07	4.03188	-5.48028e-07
4.04588	-2.50086e-07	4.03788	-8.0354e-07	4.05088	-8.25863e-07	4.04188	-5.31854e-07
4.05588	-2.60767e-07	4.04788	-8.01098e-07	4.06088	-8.50582e-07	4.05188	-5.51385e-07
4.06588	-2.50422e-07	4.05788	-8.05981e-07	4.07088	-8.22506e-07	4.06188	-5.3338e-07
4.07588	-2.60706e-07	4.06788	-7.99573e-07	4.08088	-8.48751e-07	4.07188	-5.51995e-07
4.08588	-2.48988e-07	4.07788	-8.05981e-07	4.09088	-8.25252e-07	4.08188	-5.33685e-07
4.09588	-2.6031e-07	4.08788	-8.03235e-07	4.10088	-8.50887e-07	4.09188	-5.53521e-07
4.10588	-2.49995e-07	4.09788	-8.08728e-07	4.11088	-8.28915e-07	4.10188	-5.36126e-07
4.11588	-2.5973e-07	4.10788	-8.02014e-07	4.12088	-8.48751e-07	4.11188	-5.53827e-07
4.12588	-2.48255e-07	4.11788	-8.05066e-07	4.13088	-8.3044e-07	4.12188	-5.37652e-07
4.13588	-2.59852e-07	4.12788	-8.04761e-07	4.14088	-8.49666e-07	4.13188	-5.55658e-07
4.14588	-2.48438e-07	4.13788	-8.06592e-07	4.15088	-8.28609e-07	4.14188	-5.39178e-07
4.15588	-2.59303e-07	4.14788	-8.05981e-07	4.16088	-8.52108e-07	4.15188	-5.57794e-07
4.16588	-2.4795e-07	4.15788	-8.04761e-07	4.17088	-8.27694e-07	4.16188	-5.40399e-07
4.17588	-2.58967e-07	4.16788	-8.03845e-07	4.18088	-8.51803e-07	4.17188	-5.62677e-07
4.18588	-2.47492e-07	4.17788	-8.10254e-07	4.19088	-8.25252e-07	4.18188	-5.39483e-07
4.19588	-2.58662e-07	4.18788	-8.07202e-07	4.20088	-8.52718e-07	4.19188	-5.61151e-07
4.20588	-2.47859e-07	4.19788	-8.06897e-07	4.21088	-8.29525e-07	4.20188	-5.4223e-07
4.21588	-2.58296e-07	4.20788	-8.05066e-07	4.22088	-8.49361e-07	4.21188	-5.63897e-07
4.22588	-2.46821e-07	4.21788	-8.11169e-07	4.23088	-8.2922e-07	4.22188	-5.44671e-07
4.23588	-2.5857e-07	4.22788	-8.05371e-07	4.24088	-8.53023e-07	4.23188	-5.65423e-07
4.24588	-2.45661e-07	4.23788	-8.05371e-07	4.25088	-8.30135e-07	4.24188	-5.44671e-07
4.25588	-2.58936e-07	4.24788	-8.05981e-07	4.26088	-8.54244e-07	4.25188	-5.66644e-07
4.26588	-2.456e-07	4.25788	-8.12695e-07	4.27088	-8.28609e-07	4.26188	-5.45587e-07
4.27588	-2.58357e-07	4.26788	-8.07507e-07	4.28088	-8.49972e-07	4.27188	-5.67254e-07
4.28588	-2.45478e-07	4.27788	-8.09643e-07	4.29088	-8.2983e-07	4.28188	-5.46808e-07
4.29588	-2.57807e-07	4.28788	-8.07507e-07	4.30088	-8.52413e-07	4.29188	-5.66034e-07
4.30588	-2.4557e-07	4.29788	-8.10254e-07	4.31088	-8.28915e-07	4.30188	-5.49554e-07
4.31588	-2.57594e-07	4.30788	-8.09643e-07	4.32088	-8.51498e-07	4.31188	-5.69391e-07
4.32588	-2.45539e-07	4.31788	-8.14831e-07	4.33088	-8.28915e-07	4.32188	-5.5108e-07
4.33588	-2.57868e-07	4.32788	-8.11474e-07	4.34088	-8.50887e-07	4.33188	-5.70611e-07
4.34588	-2.44288e-07	4.33788	-8.12695e-07	4.35088	-8.31051e-07	4.34188	-5.5108e-07
4.35588	-2.57411e-07	4.34788	-8.07202e-07	4.36088	-8.51498e-07	4.35188	-5.71222e-07
4.36588	-2.438e-07	4.35788	-8.09643e-07	4.37088	-8.32271e-07	4.36188	-5.53216e-07
4.37588	-2.57105e-07	4.36788	-8.10254e-07	4.38088	-8.53329e-07	4.37188	-5.73358e-07
4.38588	-2.44044e-07	4.37788	-8.14221e-07	4.39088	-8.2983e-07	4.38188	-5.52606e-07
4.39588	-2.57044e-07	4.38788	-8.11474e-07	4.40088	-8.53939e-07	4.39188	-5.74273e-07
4.40588	-2.43342e-07	4.39788	-8.1178e-07	4.41088	-8.31966e-07	4.40188	-5.54742e-07
4.41588	-2.56739e-07	4.40788	-8.14526e-07	4.42088	-8.50582e-07	4.41188	-5.75799e-07
4.42588	-2.43861e-07	4.41788	-8.1178e-07	4.43088	-8.32882e-07	4.42188	-5.58099e-07
4.43588	-2.56525e-07	4.42788	-8.11169e-07	4.44088	-8.53634e-07	4.43188	-5.76104e-07
4.44588	-2.43037e-07	4.43788	-8.10559e-07	4.45088	-8.32577e-07	4.44188	-5.6054e-07
4.45588	-2.56709e-07	4.44788	-8.12695e-07	4.46088	-8.51192e-07	4.45188	-5.78851e-07
4.46588	-2.42854e-07	4.45788	-8.12085e-07	4.47088	-8.32577e-07	4.46188	-5.59015e-07
4.47588	-2.55488e-07	4.46788	-8.17883e-07	4.48088	-8.51498e-07	4.47188	-5.75494e-07
4.48588	-2.42274e-07	4.47788	-8.1239e-07	4.49088	-8.33187e-07	4.48188	-5.5932e-07
4.49588	-2.5619e-07	4.48788	-8.14526e-07	4.50088	-8.56686e-07	4.49188	-5.80987e-07
4.50588	-2.41206e-07	4.49788	-8.17273e-07	4.51088	-8.31966e-07	4.50188	-5.6054e-07
4.51588	-2.56342e-07	4.50788	-8.10254e-07	4.52088	-8.55465e-07	4.51188	-5.83123e-07
4.52588	-2.4206e-07	4.51788	-8.11474e-07	4.53088	-8.3044e-07	4.52188	-5.63592e-07
4.53588	-2.55305e-07	4.52788	-8.17273e-07	4.54088	-8.56686e-07	4.53188	-5.81292e-07
4.54588	-2.41572e-07	4.53788	-8.15442e-07	4.55088	-8.28915e-07	4.54188	-5.6054e-07
4.55588	-2.55396e-07	4.54788	-8.16968e-07	4.56088	-8.53329e-07	4.55188	-5.84039e-07
4.56588	-2.40809e-07	4.55788	-8.12695e-07	4.57088	-8.34408e-07	4.56188	-5.64813e-07
4.57588	-2.54908e-07	4.56788	-8.14831e-07	4.58088	-8.53634e-07	4.57188	-5.84344e-07
4.58588	-2.4148e-07	4.57788	-8.18188e-07	4.59088	-8.31966e-07	4.58188	-5.69696e-07
4.59588	-2.55671e-07	4.58788	-8.14526e-07	4.60088	-8.57906e-07	4.59188	-5.87396e-07
4.60588	-2.40443e-07	4.59788	-8.13916e-07	4.61088	-8.32882e-07	4.60188	-5.63897e-07
4.61588	-2.55152e-07	4.60788	-8.16052e-07	4.62088	-8.55465e-07	4.61188	-5.87396e-07
4.62588	-2.40473e-07	4.61788	-8.14221e-07	4.63088	-8.33797e-07	4.62188	-5.69391e-07
4.63588	-2.54725e-07	4.62788	-8.15747e-07	4.64088	-8.55465e-07	4.63188	-5.8526e-07
4.64588	-2.39039e-07	4.63788	-8.17883e-07	4.65088	-8.36544e-07	4.64188	-5.68475e-07
4.65588	-2.55244e-07	4.64788	-8.17883e-07	4.66088	-8.56686e-07	4.65188	-5.89227e-07
4.66588	-2.39619e-07	4.65788	-8.16357e-07	4.67088	-8.33797e-07	4.66188	-5.69391e-07
4.67588	-2.54939e-07	4.66788	-8.17273e-07	4.68088	-8.5516e-07	4.67188	-5.89837e-07
4.68588	-2.38795e-07	4.67788	-8.19104e-07	4.69088	-8.33797e-07	4.68188	-5.70611e-07
4.69588	-2.54267e-07	4.68788	-8.20019e-07	4.70088	-8.5516e-07	4.69188	-5.93499e-07
4.70588	-2.38093e-07	4.69788	-8.17883e-07	4.71088	-8.34713e-07	4.70188	-5.70001e-07
4.71588	-2.54023e-07	4.70788	-8.18799e-07	4.72088	-8.57296e-07	4.71188	-5.93499e-07
4.72588	-2.38154e-07	4.71788	-8.17578e-07	4.73088	-8.34408e-07	4.72188	-5.73053e-07
4.73588	-2.54664e-07	4.72788	-8.24292e-07	4.74088	-8.57906e-07	4.73188	-5.93499e-07
4.74588	-2.38551e-07	4.73788	-8.18493e-07	4.75088	-8.36239e-07	4.74188	-5.72442e-07
4.75588	-2.54328e-07	4.74788	-8.23071e-07	4.76088	-8.5577e-07	4.75188	-5.94415e-07
4.76588	-2.38154e-07	4.75788	-8.17273e-07	4.77088	-8.34408e-07	4.76188	-5.73053e-07
4.77588	-2.53901e-07	4.76788	-8.24902e-07	4.78088	-8.60042e-07	4.77188	-5.93805e-07
4.78588	-2.37147e-07	4.77788	-8.19409e-07	4.79088	-8.34408e-07	4.78188	-5.7702e-07
4.79588	-2.53687e-07	4.78788	-8.22461e-07	4.80088	-8.56686e-07	4.79188	-5.96856e-07
4.80588	-2.36872e-07	4.79788	-8.17578e-07	4.81088	-8.35934e-07	4.80188	-5.7641e-07
4.81588	-2.53535e-07	4.80788	-8.2185e-07	4.82088	-8.56075e-07	4.81188	-5.9533e-07
4.82588	-2.36903e-07	4.81788	-8.17273e-07	4.83088	-8.35934e-07	4.82188	-5.7702e-07
4.83588	-2.54237e-07	4.82788	-8.23376e-07	4.84088	-8.56686e-07	4.83188	-5.97162e-07
4.84588	-2.3614e-07	4.83788	-8.17578e-07	4.85088	-8.35934e-07	4.84188	-5.80072e-07
4.85588	-2.54145e-07	4.84788	-8.25512e-07	4.86088	-8.58211e-07	4.85188	-5.98687e-07
4.86588	-2.35621e-07	4.85788	-8.20935e-07	4.87088	-8.37459e-07	4.86188	-5.76715e-07
4.87588	-2.53504e-07	4.86788	-8.24597e-07	4.88088	-8.54549e-07	4.87188	-5.99298e-07
4.88588	-2.34919e-07	4.87788	-8.18493e-07	4.89088	-8.37765e-07	4.88188	-5.80072e-07
4.89588	-2.53108e-07	4.88788	-8.25512e-07	4.90088	-8.5638e-07	4.89188	-6.01434e-07
4.90588	-2.35438e-07	4.89788	-8.19714e-07	4.91088	-8.33492e-07	4.90188	-5.79156e-07
4.91588	-2.52436e-07	4.90788	-8.22461e-07	4.92088	-8.60348e-07	4.91188	-5.98993e-07
4.92588	-2.35072e-07	4.91788	-8.13916e-07	4.93088	-8.37459e-07	4.92188	-5.82818e-07
4.93588	-2.53535e-07	4.92788	-8.26733e-07	4.94088	-8.56686e-07	4.93188	-6.01129e-07
4.94588	-2.34309e-07	4.93788	-8.20935e-07	4.95088	-8.36544e-07	4.94188	-5.80987e-07
4.95588	-2.53016e-07	4.94788	-8.22461e-07	4.96088	-8.5516e-07	4.95188	-5.99298e-07
4.96588	-2.34766e-07	4.95788	-8.18799e-07	4.97088	-8.3868e-07	4.96188	-5.80987e-07
4.97588	-2.53748e-07	4.96788	-8.27649e-07	4.98088	-8.59432e-07	4.97188	-6.02655e-07
4.98588	-2.34278e-07	4.97788	-8.20935e-07	4.99088	-8.36849e-07	4.98188	-5.81903e-07
4.99588	-2.52802e-07	4.98788	-8.23681e-07	5.00088	-8.60042e-07	4.99188	-6.02349e-07
5.00588	-2.34065e-07	4.99788	-8.2063e-07	5.01088	-8.35934e-07	5.00188	-5.84954e-07
5.01588	-2.52741e-07	5.00788	-8.26428e-07	5.02088	-8.5638e-07	5.01188	-6.01434e-07
5.02588	-2.32783e-07	5.01788	-8.2063e-07	5.03088	-8.3807e-07	5.02188	-5.86175e-07
5.03588	-2.52863e-07	5.02788	-8.28869e-07	5.04088	-8.59127e-07	5.03188	-6.07537e-07
5.04588	-2.33302e-07	5.03788	-8.20019e-07	5.05088	-8.36849e-07	5.04188	-5.8648e-07
5.05588	-2.52833e-07	5.04788	-8.28869e-07	5.06088	-8.56686e-07	5.05188	-6.06622e-07
5.06588	-2.32508e-07	5.05788	-8.21545e-07	5.07088	-8.37765e-07	5.06188	-5.8526e-07
5.07588	-2.53138e-07	5.06788	-8.26123e-07	5.08088	-8.57906e-07	5.07188	-6.05096e-07
5.08588	-2.32203e-07	5.07788	-8.24292e-07	5.09088	-8.40511e-07	5.08188	-5.8587e-07
5.09588	-2.51917e-07	5.08788	-8.29175e-07	5.10088	-8.61874e-07	5.09188	-6.07537e-07
5.10588	-2.32172e-07	5.09788	-8.20324e-07	5.11088	-8.38985e-07	5.10188	-5.89227e-07
5.11588	-2.5268e-07	5.10788	-8.3009e-07	5.12088	-8.59737e-07	5.11188	-6.10589e-07
5.12588	-2.31959e-07	5.11788	-8.2185e-07	5.13088	-8.3807e-07	5.12188	-5.87701e-07
5.13588	-2.53291e-07	5.12788	-8.29785e-07	5.14088	-8.59737e-07	5.13188	-6.09674e-07
5.14588	-2.31196e-07	5.13788	-8.23376e-07	5.15088	-8.35628e-07	5.14188	-5.91974e-07
5.15588	-2.52253e-07	5.14788	-8.307e-07	5.16088	-8.61568e-07	5.15188	-6.09979e-07
5.16588	-2.30799e-07	5.15788	-8.2063e-07	5.17088	-8.37765e-07	5.16188	-5.90142e-07
5.17588	-2.52161e-07	5.16788	-8.34668e-07	5.18088	-8.58822e-07	5.17188	-6.10284e-07
5.18588	-2.30708e-07	5.17788	-8.23681e-07	5.19088	-8.39291e-07	5.18188	-5.90142e-07
5.19588	-2.52985e-07	5.18788	-8.33752e-07	5.20088	-8.59432e-07	5.19188	-6.14557e-07
5.20588	-2.30189e-07	5.19788	-8.25818e-07	5.21088	-8.44784e-07	5.20188	-5.94415e-07
5.21588	-2.52284e-07	5.20788	-8.29785e-07	5.22088	-8.61874e-07	5.21188	-6.12115e-07
5.22588	-2.30586e-07	5.21788	-8.24902e-07	5.23088	-8.38985e-07	5.22188	-5.91974e-07
5.23588	-2.52619e-07	5.22788	-8.33447e-07	5.24088	-8.6401e-07	5.23188	-6.1181e-07
5.24588	-2.30158e-07	5.23788	-8.22766e-07	5.25088	-8.39291e-07	5.24188	-5.93499e-07
5.25588	-2.51917e-07	5.24788	-8.32532e-07	5.26088	-8.64315e-07	5.25188	-6.15777e-07
5.26588	-2.29578e-07	5.25788	-8.21545e-07	5.27088	-8.36239e-07	5.26188	-5.9472e-07
5.27588	-2.52009e-07	5.26788	-8.31311e-07	5.28088	-8.58822e-07	5.27188	-6.13641e-07
5.28588	-2.29456e-07	5.27788	-8.23681e-07	5.29088	-8.40511e-07	5.28188	-5.94415e-07
5.29588	-2.52253e-07	5.28788	-8.33142e-07	5.30088	-8.62179e-07	5.29188	-6.14862e-07
5.30588	-2.2906e-07	5.29788	-8.23987e-07	5.31088	-8.39291e-07	5.30188	-5.98077e-07
5.31588	-2.52467e-07	5.30788	-8.30395e-07	5.32088	-8.61874e-07	5.31188	-6.18219e-07
5.32588	-2.28846e-07	5.31788	-8.2124e-07	5.33088	-8.38375e-07	5.32188	-5.97772e-07
5.33588	-2.51276e-07	5.32788	-8.33142e-07	5.34088	-8.59737e-07	5.33188	-6.16998e-07
5.34588	-2.28846e-07	5.33788	-8.24292e-07	5.35088	-8.41732e-07	5.34188	-5.96246e-07
5.35588	-2.51673e-07	5.34788	-8.34973e-07	5.36088	-8.6401e-07	5.35188	-6.16998e-07
5.36588	-2.28785e-07	5.35788	-8.22766e-07	5.37088	-8.40816e-07	5.36188	-6.00213e-07
5.37588	-2.50941e-07	5.36788	-8.32532e-07	5.38088	-8.56686e-07	5.37188	-6.15472e-07
5.38588	-2.27778e-07	5.37788	-8.24292e-07	5.39088	-8.42953e-07	5.38188	-6.00213e-07
5.39588	-2.51765e-07	5.38788	-8.33447e-07	5.40088	-8.59737e-07	5.39188	-6.18829e-07
5.40588	-2.27992e-07	5.39788	-8.21545e-07	5.41088	-8.42037e-07	5.40188	-6.01434e-07
5.41588	-2.51704e-07	5.40788	-8.32226e-07	5.42088	-8.62484e-07	5.41188	-6.16693e-07
5.42588	-2.27473e-07	5.41788	-8.27038e-07	5.43088	-8.42647e-07	5.42188	-5.99603e-07
5.43588	-2.51399e-07	5.42788	-8.35888e-07	5.44088	-8.58822e-07	5.43188	-6.16082e-07
5.44588	-2.27259e-07	5.43788	-8.23681e-07	5.45088	-8.45699e-07	5.44188	-6.01129e-07
5.45588	-2.51399e-07	5.44788	-8.34363e-07	5.46088	-8.60348e-07	5.45188	-6.17913e-07
5.46588	-2.27381e-07	5.45788	-8.19714e-07	5.47088	-8.40816e-07	5.46188	-5.99298e-07
5.47588	-2.5146e-07	5.46788	-8.36804e-07	5.48088	-8.58211e-07	5.47188	-6.2127e-07
5.48588	-2.26893e-07	5.47788	-8.27954e-07	5.49088	-8.45089e-07	5.48188	-6.02349e-07
5.49588	-2.51399e-07	5.48788	-8.35888e-07	5.50088	-8.57601e-07	5.49188	-6.22186e-07
5.50588	-2.26954e-07	5.49788	-8.23681e-07	5.51088	-8.41427e-07	5.50188	-6.04181e-07
5.51588	-2.5091e-07	5.50788	-8.33142e-07	5.52088	-8.60958e-07	5.51188	-6.18829e-07
5.52588	-2.26527e-07	5.51788	-8.24597e-07	5.53088	-8.40511e-07	5.52188	-6.04486e-07
5.53588	-2.50636e-07	5.52788	-8.33142e-07	5.54088	-8.59432e-07	5.53188	-6.24322e-07
5.54588	-2.26283e-07	5.53788	-8.24902e-07	5.55088	-8.39901e-07	5.54188	-6.07537e-07
5.55588	-2.50971e-07	5.54788	-8.35278e-07	5.56088	-8.60348e-07	5.55188	-6.23407e-07
5.56588	-2.25947e-07	5.55788	-8.23987e-07	5.57088	-8.40206e-07	5.56188	-6.06012e-07
5.57588	-2.50391e-07	5.56788	-8.39551e-07	5.58088	-8.61263e-07	5.57188	-6.2127e-07
5.58588	-2.25855e-07	5.57788	-8.25512e-07	5.59088	-8.44173e-07	5.58188	-6.07537e-07
5.59588	-2.49903e-07	5.58788	-8.41382e-07	5.60088	-8.57906e-07	5.59188	-6.25543e-07
5.60588	-2.25275e-07	5.59788	-8.25818e-07	5.61088	-8.42342e-07	5.60188	-6.08148e-07
5.61588	-2.50849e-07	5.60788	-8.40161e-07	5.62088	-8.58822e-07	5.61188	-6.26458e-07
5.62588	-2.25123e-07	5.61788	-8.26428e-07	5.63088	-8.44784e-07	5.62188	-6.05706e-07
5.63588	-2.49659e-07	5.62788	-8.34973e-07	5.64088	-8.6401e-07	5.63188	-6.25543e-07
5.64588	-2.25367e-07	5.63788	-8.27954e-07	5.65088	-8.39291e-07	5.64188	-6.09674e-07
5.65588	-2.49751e-07	5.64788	-8.31921e-07	5.66088	-8.63705e-07	5.65188	-6.25848e-07
5.66588	-2.25001e-07	5.65788	-8.28259e-07	5.67088	-8.44784e-07	5.66188	-6.09369e-07
5.67588	-2.49659e-07	5.66788	-8.40466e-07	5.68088	-8.59737e-07	5.67188	-6.29205e-07
5.68588	-2.24848e-07	5.67788	-8.27954e-07	5.69088	-8.43258e-07	5.68188	-6.12115e-07
5.69588	-2.50147e-07	5.68788	-8.39245e-07	5.70088	-8.55465e-07	5.69188	-6.27374e-07
5.70588	-2.24543e-07	5.69788	-8.2948e-07	5.71088	-8.43258e-07	5.70188	-6.112e-07
5.71588	-2.50452e-07	5.70788	-8.3833e-07	5.72088	-8.5516e-07	5.71188	-6.28595e-07
5.72588	-2.24635e-07	5.71788	-8.27344e-07	5.73088	-8.44173e-07	5.72188	-6.12725e-07
5.73588	-2.50269e-07	5.72788	-8.39551e-07	5.74088	-8.58822e-07	5.73188	-6.29205e-07
5.74588	-2.24177e-07	5.73788	-8.25512e-07	5.75088	-8.4692e-07	5.74188	-6.10894e-07
5.75588	-2.49934e-07	5.74788	-8.39245e-07	5.76088	-8.59432e-07	5.75188	-6.30426e-07
5.76588	-2.24055e-07	5.75788	-8.25512e-07	5.77088	-8.45089e-07	5.76188	-6.12115e-07
5.77588	-2.49415e-07	5.76788	-8.40771e-07	5.78088	-8.56686e-07	5.77188	-6.31952e-07
5.78588	-2.23994e-07	5.77788	-8.27649e-07	5.79088	-8.45699e-07	5.78188	-6.13641e-07
5.88617	2.45722e-06	5.87791	6.2921e-06	5.89091	6.35096e-06	5.8821	4.04426e-06
5.98617	1.34089e-06	5.97791	4.12383e-06	5.99091	4.154e-06	5.9821	2.78052e-06
6.08617	9.84136e-07	6.07791	3.14116e-06	6.09091	3.15912e-06	6.0821	2.14576e-06
6.18617	8.12627e-07	6.17791	2.55889e-06	6.19091	2.57074e-06	6.1821	1.74934e-06
6.28617	7.09173e-07	6.27791	2.1588e-06	6.29091	2.16761e-06	6.2821	1.47376e-06
6.38617	6.36236e-07	6.37791	1.86553e-06	6.39091	1.87128e-06	6.3821	1.27051e-06
6.48617	5.82525e-07	6.47791	1.63848e-06	6.49091	1.64454e-06	6.4821	1.11243e-06
6.58617	5.3919e-07	6.57791	1.45568e-06	6.59091	1.46235e-06	6.5821	9.87616e-07
6.68617	5.044e-07	6.67791	1.30919e-06	6.69091	1.31586e-06	6.6821	8.87519e-07
6.78617	4.75103e-07	6.77791	1.18834e-06	6.79091	1.1944e-06	6.7821	8.06037e-07
6.88617	4.50384e-07	6.87791	1.08763e-06	6.89091	1.09339e-06	6.8821	7.38593e-07
6.98617	4.27801e-07	6.97791	1.0028e-06	6.99091	1.00824e-06	6.9821	6.82746e-07
7.08617	4.09185e-07	7.07791	9.29859e-07	7.09091	9.35917e-07	7.0821	6.31781e-07
7.18617	3.92705e-07	7.17791	8.64551e-07	7.19091	8.72135e-07	7.1821	5.89667e-07
7.28617	3.77447e-07	7.27791	8.11145e-07	7.29091	8.17814e-07	7.2821	5.53046e-07
7.38617	3.64019e-07	7.37791	7.64148e-07	7.39091	7.71122e-07	7.3821	5.22834e-07
7.48617	3.51812e-07	7.47791	7.22034e-07	7.49091	7.29618e-07	7.4821	4.97809e-07
7.58617	3.393e-07	7.57791	6.85108e-07	7.59091	6.91471e-07	7.5821	4.75226e-07
7.68617	3.28924e-07	7.67791	6.52149e-07	7.69091	6.60954e-07	7.6821	4.56916e-07
7.78617	3.19158e-07	7.77791	6.24378e-07	7.79091	6.31352e-07	7.7821	4.3891e-07
7.88617	3.10613e-07	7.87791	5.97827e-07	7.89091	6.05412e-07	7.8821	4.25177e-07
7.98617	3.01763e-07	7.97791	5.74939e-07	7.99091	5.80387e-07	7.9821	4.11444e-07
8.08617	2.94439e-07	8.07791	5.54492e-07	8.09091	5.60856e-07	8.0821	4.00153e-07
8.18617	2.86504e-07	8.17791	5.34351e-07	8.19091	5.40714e-07	8.1821	3.89472e-07
8.28617	2.80401e-07	8.27791	5.1543e-07	8.29091	5.24235e-07	8.2821	3.79096e-07
8.38617	2.74297e-07	8.37791	4.99561e-07	8.39091	5.06535e-07	8.3821	3.69635e-07
8.48617	2.67278e-07	8.47791	4.86438e-07	8.49091	4.92497e-07	8.4821	3.63227e-07
8.58617	2.61785e-07	8.57791	4.72095e-07	8.59091	4.79679e-07	8.5821	3.56208e-07
8.68617	2.56902e-07	8.67791	4.59583e-07	8.69091	4.68693e-07	8.6821	3.47052e-07
8.78617	2.51409e-07	8.77791	4.50427e-07	8.79091	4.5496e-07	8.7821	3.4339e-07
8.88617	2.46831e-07	8.87791	4.39441e-07	8.89091	4.44584e-07	8.8821	3.36371e-07
8.98617	2.41033e-07	8.97791	4.27234e-07	8.99091	4.35429e-07	8.9821	3.27521e-07
9.08617	2.37371e-07	9.07791	4.21131e-07	9.09091	4.26884e-07	9.0821	3.18976e-07
9.18617	2.32488e-07	9.17791	4.11975e-07	9.19091	4.19254e-07	9.1821	3.12262e-07
9.28617	2.28826e-07	9.27791	4.04651e-07	9.29091	4.10099e-07	9.2821	3.09211e-07
9.38617	2.25164e-07	9.37791	3.95801e-07	9.39091	4.0308e-07	9.3821	3.03412e-07
9.48617	2.21502e-07	9.47791	3.87866e-07	9.49091	3.99113e-07	9.4821	2.98529e-07
9.58617	2.1784e-07	9.57791	3.82068e-07	9.59091	3.92399e-07	9.5821	2.91816e-07
9.68617	2.14178e-07	9.67791	3.7688e-07	9.69091	3.8538e-07	9.6821	2.86322e-07
9.78617	2.11431e-07	9.77791	3.71692e-07	9.79091	3.80192e-07	9.7821	2.8266e-07
9.88617	2.08379e-07	9.87791	3.65589e-07	9.89091	3.7653e-07	9.8821	2.8205e-07
9.98617	2.05633e-07	9.97791	3.61316e-07	9.99091	3.70426e-07	9.9821	2.79609e-07
10.0862	2.02886e-07	10.0779	3.55518e-07	10.0909	3.66154e-07	10.0821	2.78693e-07
10.1862	1.99834e-07	10.1779	3.5094e-07	10.1909	3.6005e-07	10.1821	2.75336e-07
10.2862	1.97088e-07	10.2779	3.46363e-07	10.2909	3.56083e-07	10.2821	2.72589e-07
10.3862	1.93731e-07	10.3779	3.39343e-07	10.3909	3.52116e-07	10.3821	2.68927e-07
10.4862	1.91412e-07	10.4779	3.3324e-07	10.4909	3.48148e-07	10.4821	2.66181e-07
10.5862	1.89153e-07	10.5779	3.30799e-07	10.5909	3.4174e-07	10.5821	2.62213e-07
10.6862	1.86407e-07	10.6779	3.27747e-07	10.6909	3.39298e-07	10.6821	2.58551e-07
10.7862	1.8366e-07	10.7779	3.22559e-07	10.7909	3.35026e-07	10.7821	2.54889e-07
10.8862	1.81402e-07	10.8779	3.19507e-07	10.8909	3.30753e-07	10.8821	2.50922e-07
10.9862	1.80212e-07	10.9779	3.14624e-07	10.9909	3.27702e-07	10.9821	2.50006e-07
11.0862	1.77404e-07	11.0779	3.11878e-07	11.0909	3.24955e-07	11.0821	2.45734e-07
11.1862	1.75115e-07	11.1779	3.07605e-07	11.1909	3.20683e-07	11.1821	2.42377e-07
11.2862	1.72857e-07	11.2779	3.03943e-07	11.2909	3.18852e-07	11.2821	2.40546e-07
11.3862	1.71239e-07	11.3779	3.00281e-07	11.3909	3.1641e-07	11.3821	2.3902e-07
11.4862	1.69103e-07	11.4779	2.9784e-07	11.4909	3.13358e-07	11.4821	2.3841e-07
11.5862	1.67181e-07	11.5779	2.95703e-07	11.5909	3.10612e-07	11.5821	2.39936e-07
11.6862	1.66112e-07	11.6779	2.92957e-07	11.6909	3.08476e-07	11.6821	2.40851e-07
11.7862	1.64892e-07	11.7779	2.89905e-07	11.7909	3.05424e-07	11.7821	2.40241e-07
11.8862	1.63244e-07	11.8779	2.86548e-07	11.8909	3.05119e-07	11.8821	2.39936e-07
11.9862	1.6123e-07	11.9779	2.84717e-07	11.9909	3.02677e-07	11.9821	2.36884e-07
12.0862	1.59582e-07	12.0779	2.82581e-07	12.0909	3.00541e-07	12.0821	2.35968e-07
12.1862	1.57995e-07	12.1779	2.78614e-07	12.1909	2.98405e-07	12.1821	2.33222e-07
12.2862	1.5592e-07	12.2779	2.77698e-07	12.2909	2.94132e-07	12.2821	2.31086e-07
12.3862	1.54211e-07	12.3779	2.75562e-07	12.3909	2.93522e-07	12.3821	2.27729e-07
12.4862	1.52502e-07	12.4779	2.72205e-07	12.4909	2.89555e-07	12.4821	2.24677e-07
12.5862	1.50762e-07	12.5779	2.70069e-07	12.5909	2.87113e-07	12.5821	2.24067e-07
12.6862	1.48931e-07	12.6779	2.67627e-07	12.6909	2.85893e-07	12.6821	2.26203e-07
12.7862	1.47924e-07	12.7779	2.64881e-07	12.7909	2.82536e-07	12.7821	2.25898e-07
12.8862	1.46551e-07	12.8779	2.63965e-07	12.8909	2.80705e-07	12.8821	2.2193e-07
12.9862	1.4533e-07	12.9779	2.63355e-07	12.9909	2.80094e-07	12.9821	2.17658e-07
13.0862	1.44079e-07	13.0779	2.59998e-07	13.0909	2.77958e-07	13.0821	2.15216e-07
13.1862	1.43316e-07	13.1779	2.58472e-07	13.1909	2.75822e-07	13.1821	2.11554e-07
13.2862	1.42614e-07	13.2779	2.56641e-07	13.2909	2.74906e-07	13.2821	2.10944e-07
13.3862	1.41576e-07	13.3779	2.56336e-07	13.3909	2.72465e-07	13.3821	2.06671e-07
13.4862	1.41119e-07	13.4779	2.54199e-07	13.4909	2.72465e-07	13.4821	2.05756e-07
13.5862	1.40081e-07	13.5779	2.51453e-07	13.5909	2.71854e-07	13.5821	2.04535e-07
13.6862	1.39135e-07	13.6779	2.49927e-07	13.6909	2.68192e-07	13.6821	2.05146e-07
13.7862	1.38921e-07	13.7779	2.47791e-07	13.7909	2.66972e-07	13.7821	2.03925e-07
13.8862	1.3651e-07	13.8779	2.47486e-07	13.8909	2.64835e-07	13.8821	2.01484e-07
13.9862	1.34862e-07	13.9779	2.4718e-07	13.9909	2.6453e-07	13.9821	2.00873e-07
14.0862	1.341e-07	14.0779	2.47486e-07	14.0909	2.62699e-07	14.0821	1.99958e-07
14.1862	1.33184e-07	14.1779	2.4718e-07	14.1909	2.61173e-07	14.1821	2.01178e-07
14.2862	1.31811e-07	14.2779	2.46265e-07	14.2909	2.58732e-07	14.2821	2.03315e-07
14.3862	1.31719e-07	14.3779	2.41687e-07	14.3909	2.58732e-07	14.3821	2.01789e-07
14.4862	1.30712e-07	14.4779	2.40467e-07	14.4909	2.57816e-07	14.4821	2.00873e-07
14.5862	1.30651e-07	14.5779	2.39551e-07	14.5909	2.57816e-07	14.5821	2.00873e-07
14.6862	1.29034e-07	14.6779	2.38635e-07	14.6909	2.55375e-07	14.6821	1.99347e-07
14.7862	1.27325e-07	14.7779	2.35889e-07	14.7909	2.54765e-07	14.7821	1.97821e-07
14.8862	1.27233e-07	14.8779	2.33447e-07	14.8909	2.52628e-07	14.8821	1.97516e-07
14.9862	1.25982e-07	14.9779	2.31922e-07	14.9909	2.52018e-07	14.9821	1.95075e-07
15.0862	1.25188e-07	15.0779	2.33753e-07	15.0909	2.51408e-07	15.0821	1.94159e-07
15.1862	1.24029e-07	15.1779	2.31616e-07	15.1909	2.47746e-07	15.1821	1.93244e-07
15.2862	1.23357e-07	15.2779	2.31311e-07	15.2909	2.47746e-07	15.2821	1.93854e-07
15.3862	1.22198e-07	15.3779	2.30701e-07	15.3909	2.45304e-07	15.3821	1.94464e-07
15.4862	1.21465e-07	15.4779	2.2887e-07	15.4909	2.42558e-07	15.4821	1.94464e-07
15.5862	1.20306e-07	15.5779	2.29175e-07	15.5909	2.42863e-07	15.5821	1.93854e-07
15.6862	1.19695e-07	15.6779	2.27649e-07	15.6909	2.40421e-07	15.6821	1.92939e-07
15.7862	1.18658e-07	15.7779	2.24597e-07	15.7909	2.3859e-07	15.7821	1.89582e-07
15.8862	1.18444e-07	15.8779	2.25818e-07	15.8909	2.39811e-07	15.8821	1.85614e-07
15.9862	1.17284e-07	15.9779	2.24903e-07	15.9909	2.36759e-07	15.9821	1.84394e-07
16.0862	1.16766e-07	16.0779	2.23377e-07	16.0909	2.36149e-07	16.0821	1.83783e-07
16.1862	1.16064e-07	16.1779	2.21851e-07	16.1909	2.34623e-07	16.1821	1.82868e-07
16.2862	1.15636e-07	16.2779	2.20935e-07	16.2909	2.32182e-07	16.2821	1.81952e-07
16.3862	1.1585e-07	16.3779	2.19715e-07	16.3909	2.31266e-07	16.3821	1.84699e-07
16.4862	1.14172e-07	16.4779	2.20325e-07	16.4909	2.31571e-07	16.4821	1.83173e-07
16.5862	1.1292e-07	16.5779	2.19104e-07	16.5909	2.30045e-07	16.5821	1.84699e-07
16.6862	1.12524e-07	16.6779	2.15747e-07	16.6909	2.26994e-07	16.6821	1.81647e-07
16.7862	1.12218e-07	16.7779	2.14832e-07	16.7909	2.27299e-07	16.7821	1.82563e-07
16.8862	1.11333e-07	16.8779	2.13916e-07	16.8909	2.27604e-07	16.8821	1.81952e-07
16.9862	1.10754e-07	16.9779	2.11475e-07	16.9909	2.24247e-07	16.9821	1.81342e-07
17.0862	1.10357e-07	17.0779	2.09949e-07	17.0909	2.23637e-07	17.0821	1.81037e-07
17.1862	1.10204e-07	17.1779	2.07202e-07	17.1909	2.22721e-07	17.1821	1.80426e-07
17.2862	1.08892e-07	17.2779	2.05676e-07	17.2909	2.20585e-07	17.2821	1.81037e-07
17.3862	1.09075e-07	17.3779	2.03845e-07	17.3909	2.21806e-07	17.3821	1.78901e-07
17.4862	1.09106e-07	17.4779	2.00794e-07	17.4909	2.19364e-07	17.4821	1.77069e-07
17.5862	1.07366e-07	17.5779	1.99573e-07	17.5909	2.19975e-07	17.5821	1.75238e-07
17.6862	1.06603e-07	17.6779	1.98963e-07	17.6909	2.17533e-07	17.6821	1.74018e-07
17.7862	1.0639e-07	17.7779	1.99268e-07	17.7909	2.18144e-07	17.7821	1.74933e-07
17.8862	1.05505e-07	17.8779	1.98047e-07	17.8909	2.15702e-07	17.8821	1.73407e-07
17.9862	1.04436e-07	17.9779	1.95606e-07	17.9909	2.16618e-07	17.9821	1.73102e-07
18.0862	1.04192e-07	18.0779	1.9408e-07	18.0909	2.15397e-07	18.0821	1.73102e-07
18.1862	1.04009e-07	18.1779	1.95301e-07	18.1909	2.15397e-07	18.1821	1.72187e-07
18.2862	1.03673e-07	18.2779	1.96521e-07	18.2909	2.15397e-07	18.2821	1.70356e-07
18.3862	1.02697e-07	18.3779	1.95911e-07	18.3909	2.13871e-07	18.3821	1.68219e-07
18.4862	1.02911e-07	18.4779	1.95606e-07	18.4909	2.13566e-07	18.4821	1.64557e-07
18.5862	1.02392e-07	18.5779	1.91028e-07	18.5909	2.1265e-07	18.5821	1.63031e-07
18.6862	1.00866e-07	18.6779	1.89197e-07	18.6909	2.10209e-07	18.6821	1.58759e-07
18.7862	1.00805e-07	18.7779	1.87976e-07	18.7909	2.09293e-07	18.7821	1.56928e-07
18.8862	1.005e-07	18.8779	1.8645e-07	18.8909	2.07768e-07	18.8821	1.56317e-07
18.9862	1.00194e-07	18.9779	1.86145e-07	18.9909	2.06547e-07	18.9821	1.54792e-07
19.0862	9.99198e-08	19.0779	1.86145e-07	19.0909	2.05631e-07	19.0821	1.53571e-07
19.1862	9.94926e-08	19.1779	1.84314e-07	19.1909	2.04411e-07	19.1821	1.52045e-07
19.2862	9.87602e-08	19.2779	1.83704e-07	19.2909	2.05326e-07	19.2821	1.51435e-07
19.3862	9.83939e-08	19.3779	1.80957e-07	19.3909	2.04716e-07	19.3821	1.48993e-07
19.4862	9.83329e-08	19.4779	1.81262e-07	19.4909	2.01969e-07	19.4821	1.48078e-07
19.5862	9.80277e-08	19.5779	1.80957e-07	19.5909	2.01969e-07	19.5821	1.45942e-07
19.6862	9.72343e-08	19.6779	1.79737e-07	19.6909	2.01054e-07	19.6821	1.45026e-07
19.7862	9.68681e-08	19.7779	1.80042e-07	19.7909	1.99833e-07	19.7821	1.45026e-07
19.8862	9.61356e-08	19.8779	1.79737e-07	19.8909	1.98307e-07	19.8821	1.42585e-07
19.9862	9.53422e-08	19.9779	1.80347e-07	19.9909	1.98307e-07	19.9821	1.4411e-07
20.0862	9.52506e-08	20.0779	1.80652e-07	20.0909	1.97086e-07	20.0821	1.41059e-07
20.1862	9.49149e-08	20.1779	1.80042e-07	20.1909	1.97086e-07	20.1821	1.40143e-07
20.2862	9.43656e-08	20.2779	1.77906e-07	20.2909	1.96476e-07	20.2821	1.39228e-07
20.3862	9.47929e-08	20.3779	1.76074e-07	20.3909	1.95561e-07	20.3821	1.37702e-07
20.4862	9.38468e-08	20.4779	1.76685e-07	20.4909	1.94645e-07	20.4821	1.37397e-07
20.5862	9.34806e-08	20.5779	1.75769e-07	20.5909	1.93424e-07	20.5821	1.37702e-07
20.6862	9.28703e-08	20.6779	1.7638e-07	20.6909	1.92814e-07	20.6821	1.38007e-07
20.7862	9.20158e-08	20.7779	1.75769e-07	20.7909	1.91593e-07	20.7821	1.35871e-07
20.8862	9.21378e-08	20.8779	1.73938e-07	20.8909	1.90373e-07	20.8821	1.37091e-07
20.9862	9.0673e-08	20.9779	1.72718e-07	20.9909	1.89762e-07	20.9821	1.3526e-07
21.0862	9.04594e-08	21.0779	1.73633e-07	21.0909	1.90373e-07	21.0821	1.36481e-07
21.1862	9.07035e-08	21.1779	1.73328e-07	21.1909	1.88542e-07	21.1821	1.3526e-07
21.2862	9.03678e-08	21.2779	1.73633e-07	21.2909	1.87321e-07	21.2821	1.33734e-07
21.3862	8.96354e-08	21.3779	1.70276e-07	21.3909	1.85185e-07	21.3821	1.3465e-07
21.4862	8.8964e-08	21.4779	1.70581e-07	21.4909	1.87016e-07	21.4821	1.37091e-07
21.5862	8.88114e-08	21.5779	1.69666e-07	21.5909	1.8549e-07	21.5821	1.36786e-07
21.6862	8.81706e-08	21.6779	1.69666e-07	21.6909	1.85185e-07	21.6821	1.38007e-07
21.7862	8.75602e-08	21.7779	1.68445e-07	21.7909	1.82743e-07	21.7821	1.39533e-07
21.8862	8.73466e-08	21.8779	1.66614e-07	21.8909	1.82743e-07	21.8821	1.38007e-07
21.9862	8.75907e-08	21.9779	1.68445e-07	21.9909	1.81217e-07	21.9821	1.38007e-07
22.0862	8.65226e-08	22.0779	1.66004e-07	22.0909	1.80912e-07	22.0821	1.37702e-07
22.1862	8.68583e-08	22.1779	1.66309e-07	22.1909	1.80607e-07	22.1821	1.39533e-07
22.2862	8.62479e-08	22.2779	1.65088e-07	22.2909	1.79997e-07	22.2821	1.37397e-07
22.3862	8.60038e-08	22.3779	1.66004e-07	22.3909	1.78166e-07	22.3821	1.3526e-07
22.4862	8.60648e-08	22.4779	1.65393e-07	22.4909	1.79386e-07	22.4821	1.34345e-07
22.5862	8.59428e-08	22.5779	1.65393e-07	22.5909	1.76945e-07	22.5821	1.32209e-07
22.6862	8.52103e-08	22.6779	1.63867e-07	22.6909	1.76945e-07	22.6821	1.32209e-07
22.7862	8.48136e-08	22.7779	1.65393e-07	22.7909	1.75724e-07	22.7821	1.30683e-07
22.8862	8.42643e-08	22.8779	1.65393e-07	22.8909	1.7664e-07	22.8821	1.32819e-07
22.9862	8.39896e-08	22.9779	1.64173e-07	22.9909	1.75114e-07	22.9821	1.31598e-07
23.0862	8.36234e-08	23.0779	1.64783e-07	23.0909	1.75419e-07	23.0821	1.30072e-07
23.1862	8.27689e-08	23.1779	1.61426e-07	23.1909	1.73893e-07	23.1821	1.31293e-07
23.2862	8.19755e-08	23.2779	1.61426e-07	23.2909	1.72978e-07	23.2821	1.29767e-07
23.3862	8.17619e-08	23.3779	1.62036e-07	23.3909	1.72672e-07	23.3821	1.30378e-07
23.4862	8.18534e-08	23.4779	1.61731e-07	23.4909	1.71757e-07	23.4821	1.27631e-07
23.5862	8.20365e-08	23.5779	1.61426e-07	23.5909	1.72062e-07	23.5821	1.26105e-07
23.6862	8.08463e-08	23.6779	1.60816e-07	23.6909	1.69621e-07	23.6821	1.24274e-07
23.7862	8.07548e-08	23.7779	1.58985e-07	23.7909	1.70231e-07	23.7821	1.2519e-07
23.8862	8.04801e-08	23.8779	1.57764e-07	23.8909	1.6901e-07	23.8821	1.23664e-07
23.9862	8.04191e-08	23.9779	1.58069e-07	23.9909	1.69315e-07	23.9821	1.23664e-07
24.0862	7.95951e-08	24.0779	1.58069e-07	24.0909	1.69926e-07	24.0821	1.23664e-07
24.1862	7.98087e-08	24.1779	1.57459e-07	24.1909	1.68095e-07	24.1821	1.23969e-07
24.2862	7.91068e-08	24.2779	1.57459e-07	24.2909	1.66264e-07	24.2821	1.23053e-07
24.3862	7.83439e-08	24.3779	1.55933e-07	24.3909	1.65653e-07	24.3821	1.22138e-07
24.4862	7.92594e-08	24.4779	1.55933e-07	24.4909	1.66569e-07	24.4821	1.20917e-07
24.5862	7.82523e-08	24.5779	1.54102e-07	24.5909	1.65653e-07	24.5821	1.19696e-07
24.6862	7.87711e-08	24.6779	1.53186e-07	24.6909	1.64433e-07	24.6821	1.21222e-07
24.7862	7.86491e-08	24.7779	1.52271e-07	24.7909	1.62907e-07	24.7821	1.20612e-07
24.8862	7.83744e-08	24.8779	1.53186e-07	24.8909	1.63517e-07	24.8821	1.21833e-07
24.9862	7.73978e-08	24.9779	1.52271e-07	24.9909	1.6016e-07	24.9821	1.21527e-07
25.0862	7.70316e-08	25.0779	1.52271e-07	25.0909	1.61991e-07	25.0821	1.24274e-07
25.1862	7.58109e-08	25.1779	1.51966e-07	25.1909	1.6016e-07	25.1821	1.23664e-07
25.2862	7.58109e-08	25.2779	1.48914e-07	25.2909	1.58024e-07	25.2821	1.24274e-07
25.3862	7.55973e-08	25.3779	1.49219e-07	25.3909	1.57108e-07	25.3821	1.24884e-07
25.4862	7.52006e-08	25.4779	1.46778e-07	25.4909	1.58024e-07	25.4821	1.24274e-07
25.5862	7.44071e-08	25.5779	1.46167e-07	25.5909	1.55888e-07	25.5821	1.22443e-07
25.6862	7.47123e-08	25.6779	1.47083e-07	25.6909	1.54362e-07	25.6821	1.21527e-07
25.7862	7.45902e-08	25.7779	1.46778e-07	25.7909	1.53141e-07	25.7821	1.21833e-07
25.8862	7.47123e-08	25.8779	1.44641e-07	25.8909	1.53751e-07	25.8821	1.20002e-07
25.9862	7.37968e-08	25.9779	1.44947e-07	25.9909	1.53141e-07	25.9821	1.19391e-07
26.0862	7.37968e-08	26.0779	1.44947e-07	26.0909	1.52226e-07	26.0821	1.1756e-07
26.1862	7.30033e-08	26.1779	1.44336e-07	26.1909	1.50395e-07	26.1821	1.19391e-07
26.2862	7.30338e-08	26.2779	1.43726e-07	26.2909	1.5192e-07	26.2821	1.19086e-07
26.3862	7.30033e-08	26.3779	1.43421e-07	26.3909	1.50395e-07	26.3821	1.1695e-07
26.4862	7.27897e-08	26.4779	1.43421e-07	26.4909	1.50089e-07	26.4821	1.19086e-07
26.5862	7.22099e-08	26.5779	1.41895e-07	26.5909	1.49784e-07	26.5821	1.18171e-07
26.6862	7.18131e-08	26.6779	1.40674e-07	26.6909	1.50395e-07	26.6821	1.17865e-07
26.7862	7.12333e-08	26.7779	1.40369e-07	26.7909	1.5131e-07	26.7821	1.16339e-07
26.8862	7.11723e-08	26.8779	1.40064e-07	26.8909	1.48258e-07	26.8821	1.16645e-07
26.9862	7.08671e-08	26.9779	1.40064e-07	26.9909	1.50395e-07	26.9821	1.16645e-07
27.0862	7.09586e-08	27.0779	1.39148e-07	27.0909	1.47953e-07	27.0821	1.17255e-07
27.1862	6.986e-08	27.1779	1.38233e-07	27.1909	1.49174e-07	27.1821	1.1695e-07
27.2862	7.02567e-08	27.2779	1.38538e-07	27.2909	1.49174e-07	27.2821	1.16034e-07
27.3862	6.93107e-08	27.3779	1.37012e-07	27.3909	1.49174e-07	27.3821	1.1695e-07
27.4862	7.01347e-08	27.4779	1.37317e-07	27.4909	1.48258e-07	27.4821	1.14508e-07
27.5862	7.03483e-08	27.5779	1.35791e-07	27.5909	1.47343e-07	27.5821	1.12067e-07
27.6862	6.95243e-08	27.6779	1.34876e-07	27.6909	1.47648e-07	27.6821	1.10236e-07
27.7862	6.91276e-08	27.7779	1.34265e-07	27.7909	1.48258e-07	27.7821	1.10236e-07
27.8862	6.94633e-08	27.8779	1.34571e-07	27.8909	1.47038e-07	27.8821	1.0932e-07
27.9862	6.96159e-08	27.9779	1.33045e-07	27.9909	1.45817e-07	27.9821	1.081e-07
28.0862	7.02567e-08	28.0779	1.3335e-07	28.0909	1.45207e-07	28.0821	1.07184e-07
28.1862	6.94022e-08	28.1779	1.32434e-07	28.1909	1.47038e-07	28.1821	1.07795e-07
28.2862	6.94328e-08	28.2779	1.30603e-07	28.2909	1.45207e-07	28.2821	1.05963e-07
28.3862	6.85477e-08	28.3779	1.31214e-07	28.3909	1.45207e-07	28.3821	1.05963e-07
28.4862	6.77848e-08	28.4779	1.31824e-07	28.4909	1.4307e-07	28.4821	1.07795e-07
28.5862	6.81815e-08	28.5779	1.31519e-07	28.5909	1.46122e-07	28.5821	1.07489e-07
28.6862	6.85172e-08	28.6779	1.31519e-07	28.6909	1.4185e-07	28.6821	1.0871e-07
28.7862	6.76322e-08	28.7779	1.29077e-07	28.7909	1.4246e-07	28.7821	1.06269e-07
28.8862	6.69303e-08	28.8779	1.29688e-07	28.8909	1.42765e-07	28.8821	1.0871e-07
28.9862	6.69914e-08	28.9779	1.29077e-07	28.9909	1.4246e-07	28.9821	1.10236e-07
29.0862	6.7327e-08	29.0779	1.29383e-07	29.0909	1.4246e-07	29.0821	1.09626e-07
29.1862	6.72965e-08	29.1779	1.27857e-07	29.1909	1.43375e-07	29.1821	1.10236e-07
29.2862	6.79984e-08	29.2779	1.27246e-07	29.2909	1.4246e-07	29.2821	1.081e-07
29.3862	6.75712e-08	29.3779	1.2511e-07	29.3909	1.4246e-07	29.3821	1.0871e-07
29.4862	6.632e-08	29.4779	1.26026e-07	29.4909	1.4307e-07	29.4821	1.0932e-07
29.5862	6.71745e-08	29.5779	1.24195e-07	29.5909	1.41239e-07	29.5821	1.09015e-07
29.6862	6.65031e-08	29.6779	1.23584e-07	29.6909	1.4185e-07	29.6821	1.08405e-07
29.7862	6.632e-08	29.7779	1.21753e-07	29.7909	1.4185e-07	29.7821	1.06269e-07
29.8862	6.63505e-08	29.8779	1.22364e-07	29.8909	1.40324e-07	29.8821	1.03827e-07
29.9862	6.59232e-08	29.9779	1.21448e-07	29.9909	1.39103e-07	29.9821	1.04743e-07
30.0862	6.54044e-08	30.0779	1.22669e-07	30.0909	1.40324e-07	30.0821	1.03522e-07
30.1862	6.53434e-08	30.1779	1.22669e-07	30.1909	1.39713e-07	30.1821	1.01691e-07
30.2862	6.48856e-08	30.2779	1.20838e-07	30.2909	1.40019e-07	30.2821	1.01691e-07
30.3862	6.46415e-08	30.3779	1.21448e-07	30.3909	1.37882e-07	30.3821	9.95548e-08
30.4862	6.41532e-08	30.4779	1.20838e-07	30.4909	1.37272e-07	30.4821	9.95548e-08
30.5862	6.36955e-08	30.5779	1.22669e-07	30.5909	1.36662e-07	30.5821	9.92496e-08
30.6862	6.33292e-08	30.6779	1.20227e-07	30.6909	1.35441e-07	30.6821	1.00776e-07
30.7862	6.25663e-08	30.7779	1.20532e-07	30.7909	1.35441e-07	30.7821	1.00776e-07
30.8862	6.25663e-08	30.8779	1.20532e-07	30.8909	1.34525e-07	30.8821	1.00776e-07
30.9862	6.22306e-08	30.9779	1.19007e-07	30.9909	1.33305e-07	30.9821	1.0047e-07
31.0862	6.2078e-08	31.0779	1.21143e-07	31.0909	1.33305e-07	31.0821	1.01081e-07
31.1862	6.25968e-08	31.1779	1.19312e-07	31.1909	1.31779e-07	31.1821	1.02912e-07
31.2862	6.21085e-08	31.2779	1.19617e-07	31.2909	1.33e-07	31.2821	1.02912e-07
31.3862	6.25053e-08	31.3779	1.19007e-07	31.3909	1.31779e-07	31.3821	1.02607e-07
31.4862	6.22306e-08	31.4779	1.20532e-07	31.4909	1.31474e-07	31.4821	1.00165e-07
31.5862	6.22916e-08	31.5779	1.19312e-07	31.5909	1.30253e-07	31.5821	1.00165e-07
31.6862	6.21085e-08	31.6779	1.19007e-07	31.6909	1.29643e-07	31.6821	1.00165e-07
31.7862	6.1254e-08	31.7779	1.20227e-07	31.7909	1.28727e-07	31.7821	9.92496e-08
31.8862	6.09489e-08	31.8779	1.20227e-07	31.8909	1.29032e-07	31.8821	9.89444e-08
31.9862	6.09184e-08	31.9779	1.19922e-07	31.9909	1.28727e-07	31.9821	9.34513e-08
32.0862	6.05521e-08	32.0779	1.19312e-07	32.0909	1.27812e-07	32.0821	9.31461e-08
32.1862	6.04911e-08	32.1779	1.19922e-07	32.1909	1.27506e-07	32.1821	9.16202e-08
32.2862	5.9423e-08	32.2779	1.20227e-07	32.2909	1.27201e-07	32.2821	9.07047e-08
32.3862	6.00028e-08	32.3779	1.19617e-07	32.3909	1.25675e-07	32.3821	9.03995e-08
32.4862	6.00944e-08	32.4779	1.17481e-07	32.4909	1.2537e-07	32.4821	8.97892e-08
32.5862	5.95145e-08	32.5779	1.19312e-07	32.5909	1.2476e-07	32.5821	8.9484e-08
32.6862	6.03996e-08	32.6779	1.18091e-07	32.6909	1.23234e-07	32.6821	8.88736e-08
32.7862	5.95145e-08	32.7779	1.17481e-07	32.7909	1.22929e-07	32.7821	8.88736e-08
32.8862	5.91483e-08	32.8779	1.19007e-07	32.8909	1.23539e-07	32.8821	8.97892e-08
32.9862	5.88737e-08	32.9779	1.18091e-07	32.9909	1.22013e-07	32.9821	8.9484e-08
33.0862	5.9362e-08	33.0779	1.1687e-07	33.0909	1.22624e-07	33.0821	9.10099e-08
33.1862	5.89652e-08	33.1779	1.16565e-07	33.1909	1.22318e-07	33.1821	9.07047e-08
33.2862	5.85685e-08	33.2779	1.18091e-07	33.2909	1.22013e-07	33.2821	9.19254e-08
33.3862	5.83549e-08	33.3779	1.1626e-07	33.3909	1.21403e-07	33.3821	9.03995e-08
33.4862	5.89957e-08	33.4779	1.1565e-07	33.4909	1.21098e-07	33.4821	9.34513e-08
33.5862	5.8599e-08	33.5779	1.1626e-07	33.5909	1.19572e-07	33.5821	9.13151e-08
33.6862	5.89347e-08	33.6779	1.1626e-07	33.6909	1.20182e-07	33.6821	9.22306e-08
33.7862	5.76225e-08	33.7779	1.15039e-07	33.7909	1.21098e-07	33.7821	9.25358e-08
33.8862	5.79887e-08	33.8779	1.13208e-07	33.8909	1.20182e-07	33.8821	9.40616e-08
33.9862	5.77445e-08	33.9779	1.14429e-07	33.9909	1.21098e-07	33.9821	9.22306e-08
34.0862	5.86906e-08	34.0779	1.11988e-07	34.0909	1.19877e-07	34.0821	9.40616e-08
34.1862	5.71342e-08	34.1779	1.12903e-07	34.1909	1.21708e-07	34.1821	9.31461e-08
34.2862	5.71342e-08	34.2779	1.09851e-07	34.2909	1.21708e-07	34.2821	9.10099e-08
34.3862	5.70426e-08	34.3779	1.12903e-07	34.3909	1.21708e-07	34.3821	8.9484e-08
34.4862	5.6829e-08	34.4779	1.10156e-07	34.4909	1.21098e-07	34.4821	8.79581e-08
34.5862	5.74699e-08	34.5779	1.10462e-07	34.5909	1.20487e-07	34.5821	8.79581e-08
34.6862	5.63102e-08	34.6779	1.10767e-07	34.6909	1.21098e-07	34.6821	8.70426e-08
34.7862	5.68595e-08	34.7779	1.08631e-07	34.7909	1.19267e-07	34.7821	8.61271e-08
34.8862	5.5944e-08	34.8779	1.08936e-07	34.8909	1.19572e-07	34.8821	8.49064e-08
34.9862	5.55473e-08	34.9779	1.07715e-07	34.9909	1.21098e-07	34.9821	8.52115e-08
35.0862	5.53642e-08	35.0779	1.08936e-07	35.0909	1.17436e-07	35.0821	8.39908e-08
35.1862	5.57304e-08	35.1779	1.07105e-07	35.1909	1.19267e-07	35.1821	8.33805e-08
35.2862	5.53642e-08	35.2779	1.07715e-07	35.2909	1.19267e-07	35.2821	8.12443e-08
35.3862	5.56388e-08	35.3779	1.07715e-07	35.3909	1.18961e-07	35.3821	7.97184e-08
35.4862	5.56083e-08	35.4779	1.06189e-07	35.4909	1.17436e-07	35.4821	8.03287e-08
35.5862	5.53642e-08	35.5779	1.05884e-07	35.5909	1.18351e-07	35.5821	8.03287e-08
35.6862	5.43571e-08	35.6779	1.06494e-07	35.6909	1.17436e-07	35.6821	8.03287e-08
35.7862	5.512e-08	35.7779	1.05884e-07	35.7909	1.17741e-07	35.7821	8.09391e-08
35.8862	5.4235e-08	35.8779	1.04968e-07	35.8909	1.18351e-07	35.8821	8.03287e-08
35.9862	5.37162e-08	35.9779	1.04663e-07	35.9909	1.15299e-07	35.9821	7.9108e-08
36.0862	5.30448e-08	36.0779	1.05274e-07	36.0909	1.15299e-07	36.0821	7.84977e-08
36.1862	5.48148e-08	36.1779	1.04663e-07	36.1909	1.1652e-07	36.1821	7.88028e-08
36.2862	5.42655e-08	36.2779	1.03443e-07	36.2909	1.15299e-07	36.2821	7.81925e-08
36.3862	5.39603e-08	36.3779	1.03443e-07	36.3909	1.13773e-07	36.3821	7.81925e-08
36.4862	5.35331e-08	36.4779	1.02832e-07	36.4909	1.1591e-07	36.4821	8.03287e-08
36.5862	5.26481e-08	36.5779	1.02832e-07	36.5909	1.14384e-07	36.5821	8.00235e-08
36.6862	5.32279e-08	36.6779	1.03443e-07	36.6909	1.12858e-07	36.6821	8.27701e-08
36.7862	5.29533e-08	36.7779	1.01001e-07	36.7909	1.13163e-07	36.7821	8.12443e-08
36.8862	5.20072e-08	36.8779	1.00696e-07	36.8909	1.13468e-07	36.8821	8.09391e-08
36.9862	5.25565e-08	36.9779	1.01001e-07	36.9909	1.11637e-07	36.9821	8.21598e-08
37.0862	5.24039e-08	37.0779	1.00696e-07	37.0909	1.11332e-07	37.0821	8.2465e-08
37.1862	5.23734e-08	37.1779	1.01612e-07	37.1909	1.12248e-07	37.1821	8.09391e-08
37.2862	5.20377e-08	37.2779	1.01917e-07	37.2909	1.09501e-07	37.2821	8.00235e-08
37.3862	5.24039e-08	37.3779	9.97805e-08	37.3909	1.09501e-07	37.3821	8.15494e-08
37.4862	5.23734e-08	37.4779	9.82546e-08	37.4909	1.10111e-07	37.4821	8.06339e-08
37.5862	5.2465e-08	37.5779	9.94753e-08	37.5909	1.08585e-07	37.5821	8.09391e-08
37.6862	5.20683e-08	37.6779	9.79494e-08	37.6909	1.09196e-07	37.6821	8.09391e-08
37.7862	5.23124e-08	37.7779	9.79494e-08	37.7909	1.09806e-07	37.7821	8.09391e-08
37.8862	5.28312e-08	37.8779	9.5508e-08	37.8909	1.0828e-07	37.8821	8.09391e-08
37.9862	5.13358e-08	37.9779	9.52029e-08	37.9909	1.08891e-07	37.9821	8.06339e-08
38.0862	5.15495e-08	38.0779	9.42873e-08	38.0909	1.08891e-07	38.0821	8.00235e-08
38.1862	5.14884e-08	38.1779	9.64236e-08	38.1909	1.07975e-07	38.1821	8.03287e-08
38.2862	5.10001e-08	38.2779	9.48977e-08	38.2909	1.06754e-07	38.2821	7.88028e-08
38.3862	5.05424e-08	38.3779	9.30666e-08	38.3909	1.08891e-07	38.3821	7.81925e-08
38.4862	5.04813e-08	38.4779	9.27615e-08	38.4909	1.05534e-07	38.4821	8.09391e-08
38.5862	5.06644e-08	38.5779	9.33718e-08	38.5909	1.07365e-07	38.5821	8.03287e-08
38.6862	5.00846e-08	38.6779	9.3677e-08	38.6909	1.06754e-07	38.6821	7.88028e-08
38.7862	4.981e-08	38.7779	9.33718e-08	38.7909	1.04008e-07	38.7821	7.75821e-08
38.8862	4.95048e-08	38.8779	9.3677e-08	38.8909	1.05839e-07	38.8821	7.63614e-08
38.9862	4.9047e-08	38.9779	9.12356e-08	38.9909	1.04008e-07	38.9821	7.57511e-08
39.0862	4.83146e-08	39.0779	9.09304e-08	39.0909	1.04008e-07	39.0821	7.45304e-08
39.1862	4.79179e-08	39.1779	8.90994e-08	39.1909	1.03397e-07	39.1821	7.26993e-08
39.2862	4.86503e-08	39.2779	8.72683e-08	39.2909	1.02177e-07	39.2821	7.36149e-08
39.3862	4.78873e-08	39.3779	8.78786e-08	39.3909	1.02787e-07	39.3821	7.48356e-08
39.4862	4.8101e-08	39.4779	8.57424e-08	39.4909	1.01872e-07	39.4821	7.54459e-08
39.5862	4.88029e-08	39.5779	8.72683e-08	39.5909	1.02482e-07	39.5821	7.60563e-08
39.6862	4.87724e-08	39.6779	8.72683e-08	39.6909	1.00346e-07	39.6821	7.51407e-08
39.7862	4.86808e-08	39.7779	8.66579e-08	39.7909	1.00651e-07	39.7821	7.26993e-08
39.8862	4.86808e-08	39.8779	8.66579e-08	39.8909	1.01261e-07	39.8821	7.14786e-08
39.9862	4.88944e-08	39.9779	8.54372e-08	39.9909	1.01566e-07	39.9821	6.8732e-08
40.0862	4.87418e-08	40.0779	8.42165e-08	40.0909	9.9125e-08	40.0821	6.65958e-08
40.1862	4.79179e-08	40.1779	8.29958e-08	40.1909	1.00346e-07	40.1821	6.56803e-08
40.2862	4.8101e-08	40.2779	8.45217e-08	40.2909	9.88198e-08	40.2821	6.53751e-08
40.3862	4.84367e-08	40.3779	8.42165e-08	40.3909	1.00041e-07	40.3821	6.38492e-08
40.4862	4.81925e-08	40.4779	8.39114e-08	40.4909	9.94302e-08	40.4821	6.41544e-08
40.5862	4.82841e-08	40.5779	8.39114e-08	40.5909	9.66836e-08	40.5821	6.56803e-08
40.6862	4.82536e-08	40.6779	8.3301e-08	40.6909	1.00346e-07	40.6821	6.50699e-08
40.7862	4.79179e-08	40.7779	8.23855e-08	40.7909	9.85147e-08	40.7821	6.32389e-08
40.8862	4.79789e-08	40.8779	8.39114e-08	40.8909	9.7294e-08	40.8821	6.26285e-08
40.9862	4.75822e-08	40.9779	8.48269e-08	40.9909	9.60732e-08	40.9821	6.35441e-08
41.0862	4.80399e-08	41.0779	8.51321e-08	41.0909	9.7294e-08	41.0821	6.26285e-08
41.1862	4.77348e-08	41.1779	8.39114e-08	41.1909	9.51577e-08	41.1821	6.26285e-08
41.2862	4.78568e-08	41.2779	8.48269e-08	41.2909	9.54629e-08	41.2821	6.23234e-08
41.3862	4.75517e-08	41.3779	8.17751e-08	41.3909	9.57681e-08	41.3821	6.14078e-08
41.4862	4.73075e-08	41.4779	8.36062e-08	41.4909	9.42422e-08	41.4821	6.07975e-08
41.5862	4.78263e-08	41.5779	8.20803e-08	41.5909	9.33267e-08	41.5821	5.98819e-08
41.6862	4.73075e-08	41.6779	8.26907e-08	41.6909	9.36318e-08	41.6821	6.11026e-08
41.7862	4.7216e-08	41.7779	8.11648e-08	41.7909	9.45474e-08	41.7821	6.11026e-08
41.8862	4.75517e-08	41.8779	8.02493e-08	41.8909	9.36318e-08	41.8821	6.07975e-08
41.9862	4.67277e-08	41.9779	7.96389e-08	41.9909	9.33267e-08	41.9821	6.01871e-08
42.0862	4.68803e-08	42.0779	7.84182e-08	42.0909	9.05801e-08	42.0821	5.95768e-08
42.1862	4.65141e-08	42.1779	7.90286e-08	42.1909	9.24111e-08	42.1821	5.95768e-08
42.2862	4.6331e-08	42.2779	7.87234e-08	42.2909	9.14956e-08	42.2821	5.89664e-08
42.3862	4.58122e-08	42.3779	7.8113e-08	42.3909	9.24111e-08	42.3821	5.77457e-08
42.4862	4.57511e-08	42.4779	7.78078e-08	42.4909	8.99697e-08	42.4821	5.77457e-08
42.5862	4.54154e-08	42.5779	7.68923e-08	42.5909	8.96646e-08	42.5821	5.77457e-08
42.6862	4.59037e-08	42.6779	7.65871e-08	42.6909	9.14956e-08	42.6821	5.95768e-08
42.7862	4.50187e-08	42.7779	7.75027e-08	42.7909	8.90542e-08	42.7821	5.83561e-08
42.8862	4.4622e-08	42.8779	7.68923e-08	42.8909	8.99697e-08	42.8821	5.86612e-08
42.9862	4.49577e-08	42.9779	7.75027e-08	42.9909	9.11904e-08	42.9821	5.80509e-08
43.0862	4.45914e-08	43.0779	7.8113e-08	43.0909	9.02749e-08	43.0821	5.80509e-08
43.1862	4.48051e-08	43.1779	7.75027e-08	43.1909	9.02749e-08	43.1821	5.71354e-08
43.2862	4.41642e-08	43.2779	7.84182e-08	43.2909	9.05801e-08	43.2821	5.89664e-08
43.3862	4.44694e-08	43.3779	7.75027e-08	43.3909	8.93594e-08	43.3821	5.98819e-08
43.4862	4.44999e-08	43.4779	7.8113e-08	43.4909	8.8749e-08	43.4821	5.77457e-08
43.5862	4.39811e-08	43.5779	7.75027e-08	43.5909	8.90542e-08	43.5821	5.80509e-08
43.6862	4.43778e-08	43.6779	7.78078e-08	43.6909	9.02749e-08	43.6821	5.74405e-08
43.7862	4.43778e-08	43.7779	7.87234e-08	43.7909	8.75283e-08	43.7821	5.59147e-08
43.8862	4.45304e-08	43.8779	7.71975e-08	43.8909	8.81387e-08	43.8821	5.62198e-08
43.9862	4.41642e-08	43.9779	7.96389e-08	43.9909	8.84439e-08	43.9821	5.74405e-08
44.0862	4.38895e-08	44.0779	7.96389e-08	44.0909	8.8749e-08	44.0821	5.68302e-08
44.1862	4.49577e-08	44.1779	7.75027e-08	44.1909	8.81387e-08	44.1821	5.62198e-08
44.2862	4.52323e-08	44.2779	7.90286e-08	44.2909	8.63076e-08	44.2821	5.53043e-08
44.3862	4.48966e-08	44.3779	7.78078e-08	44.3909	8.66128e-08	44.3821	5.34733e-08
44.4862	4.4622e-08	44.4779	7.8113e-08	44.4909	8.60024e-08	44.4821	5.40836e-08
44.5862	4.45304e-08	44.5779	7.8113e-08	44.5909	8.56973e-08	44.5821	5.40836e-08
44.6862	4.41947e-08	44.6779	7.84182e-08	44.6909	8.56973e-08	44.6821	5.34733e-08
44.7862	4.39506e-08	44.7779	7.96389e-08	44.7909	8.47817e-08	44.7821	5.37784e-08
44.8862	4.40116e-08	44.8779	7.90286e-08	44.8909	8.53921e-08	44.8821	5.4694e-08
44.9862	4.35844e-08	44.9779	7.78078e-08	44.9909	8.63076e-08	44.9821	5.40836e-08
45.0862	4.40727e-08	45.0779	7.87234e-08	45.0909	8.47817e-08	45.0821	5.31681e-08
45.1862	4.34623e-08	45.1779	7.78078e-08	45.1909	8.23403e-08	45.1821	5.28629e-08
45.2862	4.37675e-08	45.2779	7.90286e-08	45.2909	8.32559e-08	45.2821	5.28629e-08
45.3862	4.33707e-08	45.3779	7.68923e-08	45.3909	8.3561e-08	45.3821	5.31681e-08
45.4862	4.28519e-08	45.4779	7.59768e-08	45.4909	8.14248e-08	45.4821	5.28629e-08
45.5862	4.23942e-08	45.5779	7.6282e-08	45.5909	8.29507e-08	45.5821	5.22526e-08
45.6862	4.26078e-08	45.6779	7.38406e-08	45.6909	8.23403e-08	45.6821	5.34733e-08
45.7862	4.30961e-08	45.7779	7.41457e-08	45.7909	8.14248e-08	45.7821	5.37784e-08
45.8862	4.31876e-08	45.8779	7.20095e-08	45.8909	8.173e-08	45.8821	5.43888e-08
45.9862	4.17838e-08	45.9779	7.20095e-08	45.9909	8.11196e-08	45.9821	5.37784e-08
46.0862	4.07462e-08	46.0779	7.2925e-08	46.0909	8.02041e-08	46.0821	5.40836e-08
46.1862	4.04716e-08	46.1779	7.23147e-08	46.1909	8.02041e-08	46.1821	5.4694e-08
46.2862	4.04105e-08	46.2779	7.13992e-08	46.2909	7.86782e-08	46.2821	5.53043e-08
46.3862	4.04105e-08	46.3779	7.13992e-08	46.3909	8.02041e-08	46.3821	5.40836e-08
46.4862	4.0319e-08	46.4779	7.26199e-08	46.4909	7.95938e-08	46.4821	5.49991e-08
46.5862	4.07462e-08	46.5779	6.98733e-08	46.5909	7.89834e-08	46.5821	5.25577e-08
46.6862	4.01664e-08	46.6779	6.92629e-08	46.6909	8.14248e-08	46.6821	5.28629e-08
46.7862	4.00138e-08	46.7779	6.86526e-08	46.7909	8.08145e-08	46.7821	5.22526e-08
46.8862	3.97086e-08	46.8779	6.7737e-08	46.8909	7.98989e-08	46.8821	5.1337e-08
46.9862	3.94035e-08	46.9779	6.86526e-08	46.9909	7.68472e-08	46.9821	4.88956e-08
47.0862	3.93729e-08	47.0779	6.80422e-08	47.0909	7.89834e-08	47.0821	4.92008e-08
47.1862	3.9434e-08	47.1779	6.62112e-08	47.1909	7.80679e-08	47.1821	5.01163e-08
47.2862	3.91593e-08	47.2779	6.89577e-08	47.2909	7.77627e-08	47.2821	5.1337e-08
47.3862	3.90983e-08	47.3779	6.7737e-08	47.3909	7.86782e-08	47.3821	5.28629e-08
47.4862	3.96171e-08	47.4779	6.7737e-08	47.4909	7.77627e-08	47.4821	5.28629e-08
47.5862	3.94645e-08	47.5779	6.7737e-08	47.5909	7.86782e-08	47.5821	5.22526e-08
47.6862	3.9434e-08	47.6779	6.74319e-08	47.6909	7.74575e-08	47.6821	5.25577e-08
47.7862	3.90983e-08	47.7779	6.74319e-08	47.7909	7.71524e-08	47.7821	4.9506e-08
47.8862	3.89457e-08	47.8779	6.65163e-08	47.8909	7.74575e-08	47.8821	4.85904e-08
47.9862	3.88541e-08	47.9779	6.65163e-08	47.9909	7.68472e-08	47.9821	4.64542e-08
48.0862	3.81828e-08	48.0779	6.95681e-08	48.0909	7.62368e-08	48.0821	4.55387e-08
48.1862	3.76945e-08	48.1779	6.92629e-08	48.1909	7.62368e-08	48.1821	4.52335e-08
48.2862	3.83964e-08	48.2779	6.71267e-08	48.2909	7.68472e-08	48.2821	4.49283e-08
48.3862	3.87626e-08	48.3779	6.80422e-08	48.3909	7.56265e-08	48.3821	4.46232e-08
48.4862	3.83048e-08	48.4779	6.83474e-08	48.4909	7.56265e-08	48.4821	4.34025e-08
48.5862	3.93119e-08	48.5779	6.80422e-08	48.5909	7.37954e-08	48.5821	4.30973e-08
48.6862	3.81828e-08	48.6779	6.71267e-08	48.6909	7.59316e-08	48.6821	4.34025e-08
48.7862	3.82133e-08	48.7779	6.89577e-08	48.7909	7.41006e-08	48.7821	4.37076e-08
48.8862	3.83048e-08	48.8779	6.71267e-08	48.8909	7.25747e-08	48.8821	4.49283e-08
48.9862	3.79081e-08	48.9779	6.71267e-08	48.9909	7.25747e-08	48.9821	4.55387e-08
49.0862	3.80912e-08	49.0779	6.52956e-08	49.0909	7.19644e-08	49.0821	4.49283e-08
49.1862	3.78776e-08	49.1779	6.49905e-08	49.1909	7.22695e-08	49.1821	4.40128e-08
49.2862	3.78165e-08	49.2779	6.34646e-08	49.2909	7.19644e-08	49.2821	4.46232e-08
49.3862	3.80912e-08	49.3779	6.25491e-08	49.3909	6.9523e-08	49.3821	4.55387e-08
49.4862	3.7786e-08	49.4779	6.46853e-08	49.4909	6.9523e-08	49.4821	4.64542e-08
49.5862	3.75724e-08	49.5779	6.37698e-08	49.5909	6.9523e-08	49.5821	4.6149e-08
49.6862	3.73893e-08	49.6779	6.37698e-08	49.6909	6.89126e-08	49.6821	4.49283e-08
49.7862	3.70536e-08	49.7779	6.43801e-08	49.7909	6.83023e-08	49.7821	4.6149e-08
49.8862	3.69621e-08	49.8779	6.19387e-08	49.8909	6.98281e-08	49.8821	4.67594e-08
49.9862	3.67484e-08	49.9779	6.16335e-08	49.9909	6.86074e-08	49.9821	4.70646e-08
50.0862	3.71146e-08	50.0779	6.04128e-08	50.0909	7.04385e-08	50.0821	4.79801e-08
50.1862	3.68705e-08	50.1779	6.25491e-08	50.1909	6.9523e-08	50.1821	4.98111e-08
50.2862	3.71757e-08	50.2779	6.0718e-08	50.2909	6.89126e-08	50.2821	5.16422e-08
50.3862	3.61991e-08	50.3779	5.98025e-08	50.3909	6.76919e-08	50.3821	5.22526e-08
50.4862	3.6016e-08	50.4779	5.98025e-08	50.4909	6.64712e-08	50.4821	5.34733e-08
50.5862	3.65653e-08	50.5779	5.91921e-08	50.5909	6.64712e-08	50.5821	5.31681e-08
50.6862	3.58329e-08	50.6779	5.82766e-08	50.6909	6.6166e-08	50.6821	5.28629e-08
50.7862	3.507e-08	50.7779	5.94973e-08	50.7909	6.79971e-08	50.7821	5.19474e-08
50.8862	3.53446e-08	50.8779	5.70559e-08	50.8909	6.58608e-08	50.8821	5.10318e-08
50.9862	3.50394e-08	50.9779	5.73611e-08	50.9909	6.6166e-08	50.9821	4.85904e-08
51.0862	3.57414e-08	51.0779	5.73611e-08	51.0909	6.70815e-08	51.0821	4.85904e-08
51.1862	3.58024e-08	51.1779	5.52248e-08	51.1909	6.52505e-08	51.1821	4.76749e-08
51.2862	3.57108e-08	51.2779	5.73611e-08	51.2909	6.67764e-08	51.2821	4.79801e-08
51.3862	3.55277e-08	51.3779	5.76662e-08	51.3909	6.55557e-08	51.3821	4.64542e-08
51.4862	3.58939e-08	51.4779	5.85818e-08	51.4909	6.58608e-08	51.4821	4.67594e-08
51.5862	3.57108e-08	51.5779	5.58352e-08	51.5909	6.58608e-08	51.5821	4.85904e-08
51.6862	3.57108e-08	51.6779	5.61404e-08	51.6909	6.52505e-08	51.6821	4.82853e-08
51.7862	3.56498e-08	51.7779	5.82766e-08	51.7909	6.6166e-08	51.7821	4.70646e-08
51.8862	3.5192e-08	51.8779	5.61404e-08	51.8909	6.52505e-08	51.8821	4.64542e-08
51.9862	3.49174e-08	51.9779	5.553e-08	51.9909	6.64712e-08	51.9821	4.67594e-08
52.0862	3.42765e-08	52.0779	5.61404e-08	52.0909	6.52505e-08	52.0821	4.52335e-08
52.1862	3.40934e-08	52.1779	5.52248e-08	52.1909	6.52505e-08	52.1821	4.40128e-08
52.2862	3.38493e-08	52.2779	5.553e-08	52.2909	6.49453e-08	52.2821	4.46232e-08
52.3862	3.34525e-08	52.3779	5.52248e-08	52.3909	6.52505e-08	52.3821	4.37076e-08
52.4862	3.36051e-08	52.4779	5.46145e-08	52.4909	6.34194e-08	52.4821	4.40128e-08
52.5862	3.30863e-08	52.5779	5.52248e-08	52.5909	6.58608e-08	52.5821	4.30973e-08
52.6862	3.4185e-08	52.6779	5.46145e-08	52.6909	6.4335e-08	52.6821	4.46232e-08
52.7862	3.43681e-08	52.7779	5.40041e-08	52.7909	6.55557e-08	52.7821	4.52335e-08
52.8862	3.43375e-08	52.8779	5.3699e-08	52.8909	6.4335e-08	52.8821	4.79801e-08
52.9862	3.49174e-08	52.9779	5.30886e-08	52.9909	6.4335e-08	52.9821	4.79801e-08
53.0862	3.42155e-08	53.0779	5.46145e-08	53.0909	6.55557e-08	53.0821	4.79801e-08
53.1862	3.36662e-08	53.1779	5.18679e-08	53.1909	6.52505e-08	53.1821	4.88956e-08
53.2862	3.32389e-08	53.2779	5.30886e-08	53.2909	6.25039e-08	53.2821	4.82853e-08
53.3862	3.3422e-08	53.3779	5.24783e-08	53.3909	6.37246e-08	53.3821	4.70646e-08
53.4862	3.36051e-08	53.4779	5.33938e-08	53.4909	6.28091e-08	53.4821	4.67594e-08
53.5862	3.32084e-08	53.5779	5.40041e-08	53.5909	6.25039e-08	53.5821	4.52335e-08
53.6862	3.29032e-08	53.6779	5.18679e-08	53.6909	6.34194e-08	53.6821	4.64542e-08
53.7862	3.35136e-08	53.7779	5.33938e-08	53.7909	6.28091e-08	53.7821	4.46232e-08
53.8862	3.35136e-08	53.8779	5.52248e-08	53.8909	6.18936e-08	53.8821	4.4318e-08
53.9862	3.29643e-08	53.9779	5.33938e-08	53.9909	6.28091e-08	53.9821	4.27921e-08
54.0862	3.32694e-08	54.0779	5.40041e-08	54.0909	6.25039e-08	54.0821	4.03507e-08
54.1862	3.38187e-08	54.1779	5.18679e-08	54.1909	6.28091e-08	54.1821	3.913e-08
54.2862	3.37882e-08	54.2779	5.27834e-08	54.2909	6.15884e-08	54.2821	3.79093e-08
54.3862	3.36967e-08	54.3779	5.24783e-08	54.3909	6.28091e-08	54.3821	3.63834e-08
54.4862	3.32999e-08	54.4779	5.24783e-08	54.4909	6.00625e-08	54.4821	3.60782e-08
54.5862	3.32084e-08	54.5779	5.24783e-08	54.5909	6.15884e-08	54.5821	3.3942e-08
54.6862	3.31168e-08	54.6779	5.12576e-08	54.6909	5.97573e-08	54.6821	3.48575e-08
54.7862	3.33915e-08	54.7779	5.12576e-08	54.7909	5.94522e-08	54.7821	3.3942e-08
54.8862	3.3361e-08	54.8779	5.06472e-08	54.8909	6.03677e-08	54.8821	3.33317e-08
54.9862	3.35441e-08	54.9779	4.97317e-08	54.9909	6.00625e-08	54.9821	3.33317e-08
55.0862	3.30558e-08	55.0779	5.06472e-08	55.0909	5.79263e-08	55.0821	3.24161e-08
55.1862	3.18961e-08	55.1779	4.8511e-08	55.1909	5.88418e-08	55.1821	3.2111e-08
55.2862	3.18351e-08	55.2779	5.00369e-08	55.2909	5.79263e-08	55.2821	3.15006e-08
55.3862	3.18351e-08	55.3779	4.72903e-08	55.3909	5.88418e-08	55.3821	3.08902e-08
55.4862	3.17435e-08	55.4779	4.82058e-08	55.4909	5.60952e-08	55.4821	3.08902e-08
55.5862	3.1591e-08	55.5779	4.82058e-08	55.5909	5.64004e-08	55.5821	3.11954e-08
55.6862	3.13468e-08	55.6779	4.72903e-08	55.6909	5.76211e-08	55.6821	3.05851e-08
55.7862	3.08891e-08	55.7779	4.69851e-08	55.7909	5.73159e-08	55.7821	2.99747e-08
55.8862	3.09806e-08	55.8779	4.75954e-08	55.8909	5.85366e-08	55.8821	3.11954e-08
55.9862	3.0706e-08	55.9779	4.69851e-08	55.9909	5.67056e-08	55.9821	3.05851e-08
56.0862	3.06449e-08	56.0779	4.66799e-08	56.0909	5.73159e-08	56.0821	2.99747e-08
56.1862	3.11027e-08	56.1779	4.60696e-08	56.1909	5.67056e-08	56.1821	3.02799e-08
56.2862	3.13773e-08	56.2779	4.5154e-08	56.2909	5.54849e-08	56.2821	2.93644e-08
56.3862	3.14079e-08	56.3779	4.54592e-08	56.3909	5.79263e-08	56.3821	2.96695e-08
56.4862	3.0767e-08	56.4779	4.45437e-08	56.4909	5.70107e-08	56.4821	2.99747e-08
56.5862	3.0767e-08	56.5779	4.5154e-08	56.5909	5.579e-08	56.5821	3.15006e-08
56.6862	3.00651e-08	56.6779	4.36282e-08	56.6909	5.579e-08	56.6821	3.02799e-08
56.7862	2.94547e-08	56.7779	4.5154e-08	56.7909	5.64004e-08	56.7821	2.8754e-08
56.8862	2.91496e-08	56.8779	4.39333e-08	56.8909	5.579e-08	56.8821	2.93644e-08
56.9862	2.91496e-08	56.9779	4.45437e-08	56.9909	5.579e-08	56.9821	3.15006e-08
57.0862	2.93021e-08	57.0779	4.3323e-08	57.0909	5.579e-08	57.0821	3.15006e-08
57.1862	2.97904e-08	57.1779	4.42385e-08	57.1909	5.579e-08	57.1821	3.2111e-08
57.2862	3.00956e-08	57.2779	4.30178e-08	57.2909	5.70107e-08	57.2821	3.24161e-08
57.3862	3.05839e-08	57.3779	4.30178e-08	57.3909	5.54849e-08	57.3821	3.33317e-08
57.4862	2.97904e-08	57.4779	4.24075e-08	57.4909	5.60952e-08	57.4821	3.11954e-08
57.5862	2.99735e-08	57.5779	4.21023e-08	57.5909	5.42642e-08	57.5821	3.27213e-08
57.6862	2.99735e-08	57.6779	4.30178e-08	57.6909	5.48745e-08	57.6821	3.30265e-08
57.7862	2.95768e-08	57.7779	4.30178e-08	57.7909	5.48745e-08	57.7821	3.2111e-08
57.8862	2.95158e-08	57.8779	4.30178e-08	57.8909	5.3959e-08	57.8821	3.30265e-08
57.9862	2.94547e-08	57.9779	4.02712e-08	57.9909	5.33486e-08	57.9821	3.3942e-08
58.0862	2.95463e-08	58.0779	4.11868e-08	58.0909	5.33486e-08	58.0821	3.36368e-08
58.1862	2.92106e-08	58.1779	4.17971e-08	58.1909	5.48745e-08	58.1821	3.36368e-08
58.2862	2.90275e-08	58.2779	4.05764e-08	58.2909	5.24331e-08	58.2821	3.60782e-08
58.3862	2.90275e-08	58.3779	4.36282e-08	58.3909	5.18228e-08	58.3821	3.60782e-08
58.4862	2.87833e-08	58.4779	4.17971e-08	58.4909	5.21279e-08	58.4821	3.54679e-08
58.5862	2.8234e-08	58.5779	4.17971e-08	58.5909	5.02969e-08	58.5821	3.69938e-08
58.6862	2.83561e-08	58.6779	4.05764e-08	58.6909	5.18228e-08	58.6821	3.57731e-08
58.7862	2.79594e-08	58.7779	4.11868e-08	58.7909	5.12124e-08	58.7821	3.48575e-08
58.8862	2.7349e-08	58.8779	3.96609e-08	58.8909	4.99917e-08	58.8821	3.48575e-08
58.9862	2.79289e-08	58.9779	4.08816e-08	58.9909	4.93814e-08	58.9821	3.54679e-08
59.0862	2.74101e-08	59.0779	3.93557e-08	59.0909	4.81607e-08	59.0821	3.51627e-08
59.1862	2.70438e-08	59.1779	3.90505e-08	59.1909	4.96865e-08	59.1821	3.63834e-08
59.2862	2.76847e-08	59.2779	3.90505e-08	59.2909	4.90762e-08	59.2821	3.63834e-08
59.3862	2.71964e-08	59.3779	3.96609e-08	59.3909	4.72451e-08	59.3821	3.57731e-08
59.4862	2.63725e-08	59.4779	4.02712e-08	59.4909	4.72451e-08	59.4821	3.54679e-08
59.5862	2.63725e-08	59.5779	4.02712e-08	59.5909	4.72451e-08	59.5821	3.45524e-08
59.6862	2.59757e-08	59.6779	3.90505e-08	59.6909	4.75503e-08	59.6821	3.36368e-08
59.7862	2.6403e-08	59.7779	3.93557e-08	59.7909	4.72451e-08	59.7821	3.45524e-08
59.8862	2.6464e-08	59.8779	3.90505e-08	59.8909	4.57192e-08	59.8821	3.45524e-08
59.9862	2.59452e-08	59.9779	3.87453e-08	59.9909	4.63296e-08	59.9821	3.3942e-08
60.0862	2.57926e-08	60.0779	3.78298e-08	60.0909	4.69399e-08	60.0821	3.2111e-08
60.1862	2.60673e-08	60.1779	3.96609e-08	60.1909	4.66348e-08	60.1821	3.27213e-08
60.2862	2.5518e-08	60.2779	3.84402e-08	60.2909	4.41934e-08	60.2821	3.24161e-08
60.3862	2.58537e-08	60.3779	3.84402e-08	60.3909	4.44985e-08	60.3821	3.24161e-08
60.4862	2.56095e-08	60.4779	3.84402e-08	60.4909	4.66348e-08	60.4821	3.27213e-08
60.5862	2.60673e-08	60.5779	3.8135e-08	60.5909	4.41934e-08	60.5821	3.27213e-08
60.6862	2.60673e-08	60.6779	3.75246e-08	60.6909	4.26675e-08	60.6821	3.24161e-08
60.7862	2.52738e-08	60.7779	3.84402e-08	60.7909	4.57192e-08	60.7821	3.27213e-08
60.8862	2.58231e-08	60.8779	3.8135e-08	60.8909	4.38882e-08	60.8821	3.2111e-08
60.9862	2.5579e-08	60.9779	3.75246e-08	60.9909	4.44985e-08	60.9821	3.24161e-08
61.0862	2.59452e-08	61.0779	3.87453e-08	61.0909	4.38882e-08	61.0821	3.27213e-08
61.1862	2.57011e-08	61.1779	3.72195e-08	61.1909	4.23623e-08	61.1821	3.27213e-08
61.2862	2.53959e-08	61.2779	3.66091e-08	61.2909	4.1752e-08	61.2821	3.45524e-08
61.3862	2.48161e-08	61.3779	3.63039e-08	61.3909	4.14468e-08	61.3821	3.42472e-08
61.4862	2.50602e-08	61.4779	3.59988e-08	61.4909	4.1752e-08	61.4821	3.51627e-08
61.5862	2.50602e-08	61.5779	3.53884e-08	61.5909	3.99209e-08	61.5821	3.36368e-08
61.6862	2.50907e-08	61.6779	3.41677e-08	61.6909	3.96157e-08	61.6821	3.54679e-08
61.7862	2.48466e-08	61.7779	3.44729e-08	61.7909	4.02261e-08	61.7821	3.36368e-08
61.8862	2.49381e-08	61.8779	3.59988e-08	61.8909	4.05313e-08	61.8821	3.27213e-08
61.9862	2.3931e-08	61.9779	3.44729e-08	61.9909	4.08364e-08	61.9821	3.24161e-08
62.0862	2.39616e-08	62.0779	3.41677e-08	62.0909	3.8395e-08	62.0821	3.24161e-08
62.1862	2.37785e-08	62.1779	3.44729e-08	62.1909	3.93106e-08	62.1821	3.18058e-08
62.2862	2.42057e-08	62.2779	3.26418e-08	62.2909	3.96157e-08	62.2821	3.24161e-08
62.3862	2.40836e-08	62.3779	3.23367e-08	62.3909	3.80899e-08	62.3821	3.11954e-08
62.4862	2.37479e-08	62.4779	3.08108e-08	62.4909	3.74795e-08	62.4821	3.18058e-08
62.5862	2.39616e-08	62.5779	3.14211e-08	62.5909	3.87002e-08	62.5821	2.99747e-08
62.6862	2.41752e-08	62.6779	2.89797e-08	62.6909	3.71743e-08	62.6821	3.11954e-08
62.7862	2.42057e-08	62.7779	2.83694e-08	62.7909	3.8395e-08	62.7821	3.18058e-08
62.8862	2.39616e-08	62.8779	2.68435e-08	62.8909	3.8395e-08	62.8821	3.27213e-08
62.9862	2.3809e-08	62.9779	2.80642e-08	62.9909	3.80899e-08	62.9821	3.30265e-08
63.0862	2.39005e-08	63.0779	2.74538e-08	63.0909	3.8395e-08	63.0821	3.24161e-08
63.1862	2.35038e-08	63.1779	2.71487e-08	63.1909	3.68691e-08	63.1821	3.3942e-08
63.2862	2.35343e-08	63.2779	2.65383e-08	63.2909	3.99209e-08	63.2821	3.2111e-08
63.3862	2.37785e-08	63.3779	2.65383e-08	63.3909	3.87002e-08	63.3821	3.18058e-08
63.4862	2.35954e-08	63.4779	2.65383e-08	63.4909	3.8395e-08	63.4821	3.24161e-08
63.5862	2.45719e-08	63.5779	2.68435e-08	63.5909	3.87002e-08	63.5821	3.15006e-08
63.6862	2.3931e-08	63.6779	2.50124e-08	63.6909	3.8395e-08	63.6821	3.02799e-08
63.7862	2.42057e-08	63.7779	2.71487e-08	63.7909	3.77847e-08	63.7821	3.02799e-08
63.8862	2.41752e-08	63.8779	2.71487e-08	63.8909	3.96157e-08	63.8821	3.02799e-08
63.9862	2.39616e-08	63.9779	2.7759e-08	63.9909	3.90054e-08	63.9821	3.02799e-08
64.0862	2.28935e-08	64.0779	2.71487e-08	64.0909	3.87002e-08	64.0821	2.96695e-08
64.1862	2.32597e-08	64.1779	2.5928e-08	64.1909	3.8395e-08	64.1821	2.84488e-08
64.2862	2.28324e-08	64.2779	2.5928e-08	64.2909	3.93106e-08	64.2821	2.96695e-08
64.3862	2.2924e-08	64.3779	2.7759e-08	64.3909	3.96157e-08	64.3821	2.93644e-08
64.4862	2.24967e-08	64.4779	2.71487e-08	64.4909	3.96157e-08	64.4821	2.84488e-08
64.5862	2.32597e-08	64.5779	2.65383e-08	64.5909	3.99209e-08	64.5821	2.93644e-08
64.6862	2.31376e-08	64.6779	2.74538e-08	64.6909	3.87002e-08	64.6821	2.84488e-08
64.7862	2.23747e-08	64.7779	2.71487e-08	64.7909	3.8395e-08	64.7821	2.84488e-08
64.8862	2.26493e-08	64.8779	2.74538e-08	64.8909	4.02261e-08	64.8821	2.78385e-08
64.9862	2.28629e-08	64.9779	2.74538e-08	64.9909	3.77847e-08	64.9821	2.81437e-08
65.0862	2.28019e-08	65.0779	2.7759e-08	65.0909	3.93106e-08	65.0821	2.81437e-08
65.1862	2.21e-08	65.1779	2.92849e-08	65.1909	3.77847e-08	65.1821	2.81437e-08
65.2862	2.23441e-08	65.2779	2.80642e-08	65.2909	3.53433e-08	65.2821	2.81437e-08
65.3862	2.28629e-08	65.3779	2.95901e-08	65.3909	3.8395e-08	65.3821	2.78385e-08
65.4862	2.25578e-08	65.4779	2.95901e-08	65.4909	3.68691e-08	65.4821	2.72281e-08
65.5862	2.16422e-08	65.5779	2.89797e-08	65.5909	3.71743e-08	65.5821	2.72281e-08
65.6862	2.13981e-08	65.6779	3.20315e-08	65.6909	3.6564e-08	65.6821	2.6923e-08
65.7862	2.20695e-08	65.7779	3.20315e-08	65.7909	3.59536e-08	65.7821	2.81437e-08
65.8862	2.22526e-08	65.8779	3.14211e-08	65.8909	3.56484e-08	65.8821	2.81437e-08
65.9862	2.17948e-08	65.9779	3.14211e-08	65.9909	3.56484e-08	65.9821	2.84488e-08
66.0862	2.12455e-08	66.0779	3.1116e-08	66.0909	3.62588e-08	66.0821	2.93644e-08
66.1862	2.14591e-08	66.1779	3.05056e-08	66.1909	3.74795e-08	66.1821	2.8754e-08
66.2862	2.13065e-08	66.2779	3.23367e-08	66.2909	3.53433e-08	66.2821	2.99747e-08
66.3862	2.11539e-08	66.3779	3.05056e-08	66.3909	3.62588e-08	66.3821	3.05851e-08
66.4862	2.10929e-08	66.4779	2.95901e-08	66.4909	3.53433e-08	66.4821	2.93644e-08
66.5862	2.02384e-08	66.5779	2.98952e-08	66.5909	3.62588e-08	66.5821	2.78385e-08
66.6862	2.02384e-08	66.6779	2.95901e-08	66.6909	3.44277e-08	66.6821	2.8754e-08
66.7862	1.98112e-08	66.7779	2.89797e-08	66.7909	3.53433e-08	66.7821	2.81437e-08
66.8862	2.02384e-08	66.8779	2.95901e-08	66.8909	3.41226e-08	66.8821	2.8754e-08
66.9862	1.98417e-08	66.9779	3.1116e-08	66.9909	3.50381e-08	66.9821	2.99747e-08
67.0862	1.96891e-08	67.0779	3.05056e-08	67.0909	3.47329e-08	67.0821	2.93644e-08
67.1862	1.91398e-08	67.1779	2.89797e-08	67.1909	3.47329e-08	67.1821	2.90592e-08
67.2862	1.96891e-08	67.2779	2.89797e-08	67.2909	3.47329e-08	67.2821	2.96695e-08
67.3862	1.94755e-08	67.3779	3.1116e-08	67.3909	3.47329e-08	67.3821	2.81437e-08
67.4862	1.95365e-08	67.4779	3.05056e-08	67.4909	3.41226e-08	67.4821	2.8754e-08
67.5862	1.91703e-08	67.5779	2.95901e-08	67.5909	3.47329e-08	67.5821	2.84488e-08
67.6862	1.85905e-08	67.6779	3.02004e-08	67.6909	3.50381e-08	67.6821	2.72281e-08
67.7862	1.84379e-08	67.7779	2.83694e-08	67.7909	3.44277e-08	67.7821	2.78385e-08
67.8862	1.88041e-08	67.8779	2.83694e-08	67.8909	3.47329e-08	67.8821	2.57023e-08
67.9862	1.88346e-08	67.9779	2.89797e-08	67.9909	3.38174e-08	67.9821	2.53971e-08
68.0862	1.85294e-08	68.0779	2.83694e-08	68.0909	3.10708e-08	68.0821	2.60074e-08
68.1862	1.85905e-08	68.1779	2.68435e-08	68.1909	3.22915e-08	68.1821	2.60074e-08
68.2862	1.81327e-08	68.2779	2.83694e-08	68.2909	3.10708e-08	68.2821	2.53971e-08
68.3862	1.7797e-08	68.3779	2.65383e-08	68.3909	3.22915e-08	68.3821	2.53971e-08
68.4862	1.82853e-08	68.4779	2.62331e-08	68.4909	3.25967e-08	68.4821	2.44816e-08
68.5862	1.78886e-08	68.5779	2.53176e-08	68.5909	3.01553e-08	68.5821	2.53971e-08
68.6862	1.80717e-08	68.6779	2.56228e-08	68.6909	3.16812e-08	68.6821	2.53971e-08
68.7862	1.79801e-08	68.7779	2.37917e-08	68.7909	3.19863e-08	68.7821	2.44816e-08
68.8862	1.76749e-08	68.8779	2.53176e-08	68.8909	3.16812e-08	68.8821	2.29557e-08
68.9862	1.79191e-08	68.9779	2.53176e-08	68.9909	3.01553e-08	68.9821	2.26505e-08
69.0862	1.85294e-08	69.0779	2.22659e-08	69.0909	3.01553e-08	69.0821	2.3566e-08
69.1862	1.89262e-08	69.1779	2.44021e-08	69.1909	3.07656e-08	69.1821	2.41764e-08
69.2862	1.88041e-08	69.2779	2.28762e-08	69.2909	3.04605e-08	69.2821	2.23453e-08
69.3862	1.85294e-08	69.3779	2.31814e-08	69.3909	3.10708e-08	69.3821	2.32609e-08
69.4862	1.84379e-08	69.4779	2.31814e-08	69.4909	3.01553e-08	69.4821	2.23453e-08
69.5862	1.81327e-08	69.5779	2.31814e-08	69.5909	2.89346e-08	69.5821	2.20401e-08
69.6862	1.81632e-08	69.6779	2.16555e-08	69.6909	3.01553e-08	69.6821	2.14298e-08
69.7862	1.79801e-08	69.7779	2.16555e-08	69.7909	3.07656e-08	69.7821	2.1735e-08
69.8862	1.75529e-08	69.8779	2.31814e-08	69.8909	3.04605e-08	69.8821	2.23453e-08
69.9862	1.72477e-08	69.9779	2.22659e-08	69.9909	3.1376e-08	69.9821	2.32609e-08
70.0862	1.79191e-08	70.0779	2.074e-08	70.0909	3.04605e-08	70.0821	2.11246e-08
70.1862	1.7797e-08	70.1779	2.16555e-08	70.1909	3.10708e-08	70.1821	2.14298e-08
70.2862	1.76749e-08	70.2779	2.19607e-08	70.2909	3.22915e-08	70.2821	2.11246e-08
70.3862	1.74003e-08	70.3779	2.16555e-08	70.3909	3.07656e-08	70.3821	2.02091e-08
70.4862	1.71561e-08	70.4779	2.2571e-08	70.4909	3.07656e-08	70.4821	2.08194e-08
70.5862	1.70646e-08	70.5779	2.04348e-08	70.5909	3.10708e-08	70.5821	2.14298e-08
70.6862	1.70951e-08	70.6779	2.01296e-08	70.6909	3.1376e-08	70.6821	2.11246e-08
70.7862	1.73393e-08	70.7779	2.16555e-08	70.7909	3.10708e-08	70.7821	2.08194e-08
70.8862	1.71867e-08	70.8779	2.2571e-08	70.8909	3.07656e-08	70.8821	2.05143e-08
70.9862	1.73087e-08	70.9779	2.22659e-08	70.9909	2.86294e-08	70.9821	2.05143e-08
71.0862	1.70036e-08	71.0779	2.01296e-08	71.0909	2.98501e-08	71.0821	2.11246e-08
71.1862	1.72172e-08	71.1779	2.13503e-08	71.1909	3.29019e-08	71.1821	1.95987e-08
71.2862	1.65458e-08	71.2779	2.16555e-08	71.2909	3.16812e-08	71.2821	1.95987e-08
71.3862	1.59049e-08	71.3779	2.074e-08	71.3909	3.07656e-08	71.3821	1.99039e-08
71.4862	1.55692e-08	71.4779	2.10452e-08	71.4909	3.04605e-08	71.4821	1.92936e-08
71.5862	1.58134e-08	71.5779	2.074e-08	71.5909	3.01553e-08	71.5821	1.8378e-08
71.6862	1.57523e-08	71.6779	2.01296e-08	71.6909	3.16812e-08	71.6821	1.92936e-08
71.7862	1.55692e-08	71.7779	2.04348e-08	71.7909	2.77139e-08	71.7821	1.89884e-08
71.8862	1.5203e-08	71.8779	1.98244e-08	71.8909	2.86294e-08	71.8821	1.89884e-08
71.9862	1.51725e-08	71.9779	1.95193e-08	71.9909	2.8019e-08	71.9821	1.99039e-08
72.0862	1.54777e-08	72.0779	2.01296e-08	72.0909	2.98501e-08	72.0821	1.92936e-08
72.1862	1.54777e-08	72.1779	2.01296e-08	72.1909	2.86294e-08	72.1821	1.89884e-08
72.2862	1.55387e-08	72.2779	2.04348e-08	72.2909	2.95449e-08	72.2821	1.95987e-08
72.3862	1.51725e-08	72.3779	2.074e-08	72.3909	2.77139e-08	72.3821	1.89884e-08
72.4862	1.53556e-08	72.4779	1.95193e-08	72.4909	2.55776e-08	72.4821	1.92936e-08
72.5862	1.55998e-08	72.5779	1.92141e-08	72.5909	2.67983e-08	72.5821	1.89884e-08
72.6862	1.46537e-08	72.6779	2.074e-08	72.6909	2.49673e-08	72.6821	1.95987e-08
72.7862	1.41044e-08	72.7779	1.79934e-08	72.7909	2.6188e-08	72.7821	1.80729e-08
72.8862	1.37382e-08	72.8779	2.074e-08	72.8909	2.52725e-08	72.8821	2.08194e-08
72.9862	1.30668e-08	72.9779	2.074e-08	72.9909	2.43569e-08	72.9821	1.92936e-08
73.0862	1.40434e-08	73.0779	1.95193e-08	73.0909	2.40518e-08	73.0821	1.92936e-08
73.1862	1.46232e-08	73.1779	1.82986e-08	73.1909	2.37466e-08	73.1821	1.80729e-08
73.2862	1.44706e-08	73.2779	1.95193e-08	73.2909	2.40518e-08	73.2821	1.95987e-08
73.3862	1.49589e-08	73.3779	1.98244e-08	73.3909	2.55776e-08	73.3821	1.89884e-08
73.4862	1.48063e-08	73.4779	1.95193e-08	73.4909	2.58828e-08	73.4821	1.77677e-08
73.5862	1.44401e-08	73.5779	1.86037e-08	73.5909	2.52725e-08	73.5821	1.77677e-08
73.6862	1.46842e-08	73.6779	1.76882e-08	73.6909	2.49673e-08	73.6821	1.8378e-08
73.7862	1.49894e-08	73.7779	1.7383e-08	73.7909	2.46621e-08	73.7821	1.80729e-08
73.8862	1.45011e-08	73.8779	1.92141e-08	73.8909	2.40518e-08	73.8821	1.74625e-08
73.9862	1.31278e-08	73.9779	1.92141e-08	73.9909	2.31362e-08	73.9821	1.68522e-08
74.0862	1.35551e-08	74.0779	1.89089e-08	74.0909	2.40518e-08	74.0821	1.6547e-08
74.1862	1.34025e-08	74.1779	1.79934e-08	74.1909	2.40518e-08	74.1821	1.62418e-08
74.2862	1.31889e-08	74.2779	1.92141e-08	74.2909	2.31362e-08	74.2821	1.59366e-08
74.3862	1.28837e-08	74.3779	1.92141e-08	74.3909	2.40518e-08	74.3821	1.74625e-08
74.4862	1.33109e-08	74.4779	1.86037e-08	74.4909	2.43569e-08	74.4821	1.71573e-08
74.5862	1.29447e-08	74.5779	2.13503e-08	74.5909	2.55776e-08	74.5821	1.6547e-08
74.6862	1.32804e-08	74.6779	1.79934e-08	74.6909	2.49673e-08	74.6821	1.68522e-08
74.7862	1.32499e-08	74.7779	1.82986e-08	74.7909	2.37466e-08	74.7821	1.68522e-08
74.8862	1.2548e-08	74.8779	1.95193e-08	74.8909	2.34414e-08	74.8821	1.74625e-08
74.9862	1.29142e-08	74.9779	1.82986e-08	74.9909	2.40518e-08	74.9821	1.47159e-08
75.0862	1.24259e-08	75.0779	1.76882e-08	75.0909	2.25259e-08	75.0821	1.59366e-08
75.1862	1.23344e-08	75.1779	1.79934e-08	75.1909	2.49673e-08	75.1821	1.44108e-08
75.2862	1.24564e-08	75.2779	1.82986e-08	75.2909	2.43569e-08	75.2821	1.53263e-08
75.3862	1.18156e-08	75.3779	1.64675e-08	75.3909	2.19155e-08	75.3821	1.44108e-08
75.4862	1.23344e-08	75.4779	1.70779e-08	75.4909	2.19155e-08	75.4821	1.44108e-08
75.5862	1.14799e-08	75.5779	1.64675e-08	75.5909	2.13052e-08	75.5821	1.38004e-08
75.6862	1.15714e-08	75.6779	1.61623e-08	75.6909	2.16104e-08	75.6821	1.34952e-08
75.7862	1.15409e-08	75.7779	1.67727e-08	75.7909	1.97793e-08	75.7821	1.41056e-08
75.8862	1.16325e-08	75.8779	1.67727e-08	75.8909	2.00845e-08	75.8821	1.44108e-08
75.9862	1.18461e-08	75.9779	1.76882e-08	75.9909	2.00845e-08	75.9821	1.44108e-08
76.0862	1.17545e-08	76.0779	1.64675e-08	76.0909	1.97793e-08	76.0821	1.28849e-08
76.1862	1.22733e-08	76.1779	1.67727e-08	76.1909	2.03897e-08	76.1821	1.50211e-08
76.2862	1.20902e-08	76.2779	1.61623e-08	76.2909	2.13052e-08	76.2821	1.41056e-08
76.3862	1.26701e-08	76.3779	1.7383e-08	76.3909	1.85586e-08	76.3821	1.34952e-08
76.4862	1.25175e-08	76.4779	1.67727e-08	76.4909	1.9169e-08	76.4821	1.31901e-08
76.5862	1.35551e-08	76.5779	1.52468e-08	76.5909	1.94741e-08	76.5821	1.28849e-08
76.6862	1.33414e-08	76.6779	1.7383e-08	76.6909	2.1e-08	76.6821	1.41056e-08
76.7862	1.38908e-08	76.7779	1.64675e-08	76.7909	1.85586e-08	76.7821	1.38004e-08
76.8862	1.39518e-08	76.8779	1.49416e-08	76.8909	1.88638e-08	76.8821	1.34952e-08
76.9862	1.3433e-08	76.9779	1.70779e-08	76.9909	1.9169e-08	76.9821	1.31901e-08
77.0862	1.35551e-08	77.0779	1.52468e-08	77.0909	1.94741e-08	77.0821	1.19693e-08
77.1862	1.37077e-08	77.1779	1.52468e-08	77.1909	1.82534e-08	77.1821	1.28849e-08
77.2862	1.41654e-08	77.2779	1.5552e-08	77.2909	1.85586e-08	77.2821	1.16642e-08
77.3862	1.38908e-08	77.3779	1.46365e-08	77.3909	1.76431e-08	77.3821	1.25797e-08
77.4862	1.37992e-08	77.4779	1.52468e-08	77.4909	1.70327e-08	77.4821	1.31901e-08
77.5862	1.28227e-08	77.5779	1.58572e-08	77.5909	1.73379e-08	77.5821	1.22745e-08
77.6862	1.28532e-08	77.6779	1.52468e-08	77.6909	1.61172e-08	77.6821	1.10538e-08
77.7862	1.28227e-08	77.7779	1.49416e-08	77.7909	1.61172e-08	77.7821	1.16642e-08
77.8862	1.36161e-08	77.8779	1.46365e-08	77.8909	1.67275e-08	77.8821	1.22745e-08
77.9862	1.30973e-08	77.9779	1.49416e-08	77.9909	1.61172e-08	77.9821	1.16642e-08
78.0862	1.26395e-08	78.0779	1.37209e-08	78.0909	1.55068e-08	78.0821	1.1359e-08
78.1862	1.28227e-08	78.1779	1.43313e-08	78.1909	1.48965e-08	78.1821	1.04435e-08
78.2862	1.30363e-08	78.2779	1.31106e-08	78.2909	1.48965e-08	78.2821	1.16642e-08
78.3862	1.30058e-08	78.3779	1.37209e-08	78.3909	1.52017e-08	78.3821	1.16642e-08
78.4862	1.3372e-08	78.4779	1.15847e-08	78.4909	1.5812e-08	78.4821	1.1359e-08
78.5862	1.37687e-08	78.5779	1.21951e-08	78.5909	1.52017e-08	78.5821	1.04435e-08
78.6862	1.37077e-08	78.6779	1.0364e-08	78.6909	1.33706e-08	78.6821	1.01383e-08
78.7862	1.30973e-08	78.7779	9.75365e-09	78.7909	1.45913e-08	78.7821	1.07486e-08
78.8862	1.34635e-08	78.8779	1.06692e-08	78.8909	1.24551e-08	78.8821	1.07486e-08
78.9862	1.34025e-08	78.9779	1.00588e-08	78.9909	1.42861e-08	78.9821	1.10538e-08
79.0862	1.28227e-08	79.0779	9.44847e-09	79.0909	1.3981e-08	79.0821	1.04435e-08
79.1862	1.32194e-08	79.1779	9.44847e-09	79.1909	1.24551e-08	79.1821	1.01383e-08
79.2862	1.25175e-08	79.2779	9.44847e-09	79.2909	1.27603e-08	79.2821	1.01383e-08
79.3862	1.27311e-08	79.3779	9.44847e-09	79.3909	1.15396e-08	79.3821	1.1359e-08
79.4862	1.28227e-08	79.4779	1.00588e-08	79.4909	1.24551e-08	79.4821	1.16642e-08
79.5862	1.23039e-08	79.5779	9.44847e-09	79.5909	1.09292e-08	79.5821	9.83312e-09
79.6862	1.23954e-08	79.6779	8.83812e-09	79.6909	1.18447e-08	79.6821	1.19693e-08
79.7862	1.20597e-08	79.7779	8.53294e-09	79.7909	1.18447e-08	79.7821	1.28849e-08
79.8862	1.26701e-08	79.8779	7.00707e-09	79.8909	1.12344e-08	79.8821	1.28849e-08
79.9862	1.27006e-08	79.9779	1.00588e-08	79.9909	1.0624e-08	79.9821	1.22745e-08
80.0862	1.21207e-08	80.0779	8.83812e-09	80.0909	1.12344e-08	80.0821	1.22745e-08
80.1862	1.19682e-08	80.1779	8.22777e-09	80.1909	1.09292e-08	80.1821	1.38004e-08
80.2862	1.12052e-08	80.2779	9.1433e-09	80.2909	1.12344e-08	80.2821	1.41056e-08
80.3862	1.09e-08	80.3779	5.48119e-09	80.3909	1.12344e-08	80.3821	1.31901e-08
80.4862	1.10526e-08	80.4779	7.61742e-09	80.4909	1.21499e-08	80.4821	1.38004e-08
80.5862	1.14188e-08	80.5779	7.31224e-09	80.5909	1.03189e-08	80.5821	1.34952e-08
80.6862	1.12052e-08	80.6779	9.1433e-09	80.6909	1.12344e-08	80.6821	1.22745e-08
80.7862	1.06559e-08	80.7779	7.61742e-09	80.7909	9.7085e-09	80.7821	1.25797e-08
80.8862	1.01066e-08	80.8779	9.75365e-09	80.8909	1.12344e-08	80.8821	1.19693e-08
80.9862	1.05338e-08	80.9779	9.1433e-09	80.9909	1.15396e-08	80.9821	1.16642e-08
81.0862	9.77089e-09	81.0779	8.83812e-09	81.0909	1.03189e-08	81.0821	1.04435e-08
81.1862	9.28261e-09	81.1779	1.00588e-08	81.1909	1.00137e-08	81.1821	1.07486e-08
81.2862	9.52675e-09	81.2779	1.06692e-08	81.2909	1.09292e-08	81.2821	1.07486e-08
81.3862	9.46572e-09	81.3779	8.83812e-09	81.3909	9.40333e-09	81.3821	1.01383e-08
81.4862	9.4352e-09	81.4779	8.22777e-09	81.4909	1.03189e-08	81.4821	8.91759e-09
81.5862	9.64882e-09	81.5779	8.53294e-09	81.5909	9.7085e-09	81.5821	8.91759e-09
81.6862	9.46572e-09	81.6779	9.1433e-09	81.6909	1.15396e-08	81.6821	1.01383e-08
81.7862	9.09951e-09	81.7779	9.44847e-09	81.7909	1.09292e-08	81.7821	9.52794e-09
81.8862	9.22158e-09	81.8779	9.75365e-09	81.8909	1.09292e-08	81.8821	8.91759e-09
81.9862	8.76381e-09	81.9779	8.53294e-09	81.9909	1.0624e-08	81.9821	8.30724e-09
82.0862	8.82485e-09	82.0779	9.44847e-09	82.0909	1.0624e-08	82.0821	9.22277e-09
82.1862	9.13002e-09	82.1779	8.83812e-09	82.1909	1.00137e-08	82.1821	8.00206e-09
82.2862	9.06899e-09	82.2779	9.1433e-09	82.2909	1.12344e-08	82.2821	8.00206e-09
82.3862	8.18398e-09	82.3779	7.92259e-09	82.3909	1.12344e-08	82.3821	8.30724e-09
82.4862	8.51967e-09	82.4779	1.00588e-08	82.4909	1.15396e-08	82.4821	8.30724e-09
82.5862	8.48915e-09	82.5779	1.0364e-08	82.5909	1.09292e-08	82.5821	8.61242e-09
82.6862	8.55019e-09	82.6779	1.0364e-08	82.6909	1.03189e-08	82.6821	8.00206e-09
82.7862	8.2145e-09	82.7779	8.83812e-09	82.7909	1.18447e-08	82.7821	7.39171e-09
82.8862	8.61122e-09	82.8779	7.92259e-09	82.8909	9.40333e-09	82.8821	8.00206e-09
82.9862	8.48915e-09	82.9779	9.75365e-09	82.9909	1.09292e-08	82.9821	8.00206e-09
83.0862	8.79433e-09	83.0779	1.0364e-08	83.0909	1.15396e-08	83.0821	7.69689e-09
83.1862	8.33657e-09	83.1779	1.09744e-08	83.1909	8.4878e-09	83.1821	7.39171e-09
83.2862	8.51967e-09	83.2779	9.44847e-09	83.2909	9.40333e-09	83.2821	6.17101e-09
83.3862	8.67226e-09	83.3779	1.06692e-08	83.3909	1.00137e-08	83.3821	6.47618e-09
83.4862	8.9164e-09	83.4779	8.83812e-09	83.4909	1.00137e-08	83.4821	7.69689e-09
83.5862	8.36708e-09	83.5779	1.00588e-08	83.5909	8.79298e-09	83.5821	7.39171e-09
83.6862	8.24501e-09	83.6779	8.53294e-09	83.6909	9.40333e-09	83.6821	6.78136e-09
83.7862	7.93984e-09	83.7779	9.75365e-09	83.7909	1.00137e-08	83.7821	6.78136e-09
83.8862	7.97036e-09	83.8779	9.44847e-09	83.8909	1.00137e-08	83.8821	7.39171e-09
83.9862	7.39052e-09	83.9779	1.00588e-08	83.9909	9.09815e-09	83.9821	6.17101e-09
84.0862	7.6957e-09	84.0779	9.44847e-09	84.0909	9.40333e-09	84.0821	6.78136e-09
84.1862	7.78725e-09	84.1779	1.06692e-08	84.1909	9.40333e-09	84.1821	5.56066e-09
84.2862	7.29897e-09	84.2779	9.75365e-09	84.2909	8.4878e-09	84.2821	6.47618e-09
84.3862	8.15346e-09	84.3779	7.61742e-09	84.3909	7.87745e-09	84.3821	5.25548e-09
84.4862	8.42812e-09	84.4779	1.12795e-08	84.4909	7.57227e-09	84.4821	5.56066e-09
84.5862	8.03139e-09	84.5779	8.83812e-09	84.5909	7.87745e-09	84.5821	4.33995e-09
84.6862	7.54311e-09	84.6779	1.15847e-08	84.6909	7.87745e-09	84.6821	5.25548e-09
84.7862	7.36e-09	84.7779	7.92259e-09	84.7909	5.74122e-09	84.7821	5.56066e-09
84.8862	7.54311e-09	84.8779	8.83812e-09	84.8909	6.35157e-09	84.8821	5.86583e-09
84.9862	7.63466e-09	84.9779	7.92259e-09	84.9909	7.2671e-09	84.9821	4.33995e-09
85.0862	7.20742e-09	85.0779	8.22777e-09	85.0909	6.65674e-09	85.0821	4.64513e-09
85.1862	7.51259e-09	85.1779	8.83812e-09	85.1909	6.35157e-09	85.1821	4.03478e-09
85.2862	7.08535e-09	85.2779	7.92259e-09	85.2909	6.65674e-09	85.2821	5.25548e-09
85.3862	6.62758e-09	85.3779	7.61742e-09	85.3909	6.65674e-09	85.3821	4.33995e-09
85.4862	7.14638e-09	85.4779	7.31224e-09	85.4909	6.65674e-09	85.4821	4.03478e-09
85.5862	7.14638e-09	85.5779	8.22777e-09	85.5909	5.13087e-09	85.5821	4.64513e-09
85.6862	6.93276e-09	85.6779	7.31224e-09	85.6909	6.04639e-09	85.6821	4.95031e-09
85.7862	7.23793e-09	85.7779	6.39671e-09	85.7909	5.43604e-09	85.7821	4.03478e-09
85.8862	7.81777e-09	85.8779	7.61742e-09	85.8909	7.57227e-09	85.8821	4.33995e-09
85.9862	7.08535e-09	85.9779	6.70189e-09	85.9909	3.91016e-09	85.9821	3.42443e-09
86.0862	7.1769e-09	86.0779	7.61742e-09	86.0909	6.35157e-09	86.0821	3.7296e-09
86.1862	7.57363e-09	86.1779	8.53294e-09	86.1909	6.35157e-09	86.1821	3.7296e-09
86.2862	7.42104e-09	86.2779	7.00707e-09	86.2909	5.74122e-09	86.2821	4.03478e-09
86.3862	7.11586e-09	86.3779	7.92259e-09	86.3909	5.74122e-09	86.3821	3.11925e-09
86.4862	7.42104e-09	86.4779	7.92259e-09	86.4909	4.82569e-09	86.4821	2.81408e-09
86.5862	8.00087e-09	86.5779	9.1433e-09	86.5909	5.74122e-09	86.5821	4.33995e-09
86.6862	7.75673e-09	86.6779	7.31224e-09	86.6909	5.74122e-09	86.6821	4.03478e-09
86.7862	7.11586e-09	86.7779	9.44847e-09	86.7909	5.74122e-09	86.7821	2.81408e-09
86.8862	7.23793e-09	86.8779	7.92259e-09	86.8909	5.74122e-09	86.8821	3.42443e-09
86.9862	7.36e-09	86.9779	7.31224e-09	86.9909	4.21534e-09	86.9821	4.33995e-09
87.0862	6.53603e-09	87.0779	7.61742e-09	87.0909	6.35157e-09	87.0821	1.59337e-09
87.1862	6.81069e-09	87.1779	7.61742e-09	87.1909	3.91016e-09	87.1821	4.33995e-09
87.2862	6.90224e-09	87.2779	7.31224e-09	87.2909	6.04639e-09	87.2821	3.42443e-09
87.3862	6.62758e-09	87.3779	7.61742e-09	87.3909	4.52051e-09	87.3821	3.42443e-09
87.4862	6.68862e-09	87.4779	6.09154e-09	87.4909	6.35157e-09	87.4821	3.7296e-09
87.5862	6.74965e-09	87.5779	7.31224e-09	87.5909	5.13087e-09	87.5821	3.11925e-09
87.6862	6.32241e-09	87.6779	7.31224e-09	87.6909	3.29981e-09	87.6821	3.42443e-09
87.7862	6.47499e-09	87.7779	7.61742e-09	87.7909	3.91016e-09	87.7821	1.89855e-09
87.8862	5.83413e-09	87.8779	7.92259e-09	87.8909	3.91016e-09	87.8821	2.81408e-09
87.9862	5.46791e-09	87.9779	7.00707e-09	87.9909	4.21534e-09	87.9821	2.20372e-09
88.0862	5.37636e-09	88.0779	6.70189e-09	88.0909	4.52051e-09	88.0821	2.81408e-09
88.1862	5.37636e-09	88.1779	8.83812e-09	88.1909	3.91016e-09	88.1821	3.11925e-09
88.2862	4.61342e-09	88.2779	6.70189e-09	88.2909	3.60499e-09	88.2821	2.81408e-09
88.3862	4.94912e-09	88.3779	7.00707e-09	88.3909	2.07911e-09	88.3821	1.2882e-09
88.4862	4.76601e-09	88.4779	7.31224e-09	88.4909	2.99464e-09	88.4821	1.89855e-09
88.5862	5.01015e-09	88.5779	5.48119e-09	88.5909	2.99464e-09	88.5821	2.5089e-09
88.6862	5.46791e-09	88.6779	6.39671e-09	88.6909	3.60499e-09	88.6821	2.20372e-09
88.7862	5.49843e-09	88.7779	5.17601e-09	88.7909	4.21534e-09	88.7821	2.20372e-09
88.8862	5.31533e-09	88.8779	5.48119e-09	88.8909	2.99464e-09	88.8821	1.89855e-09
88.9862	5.37636e-09	88.9779	6.39671e-09	88.9909	3.91016e-09	88.9821	1.89855e-09
89.0862	5.46791e-09	89.0779	5.78636e-09	89.0909	3.29981e-09	89.0821	3.42443e-09
89.1862	5.31533e-09	89.1779	8.53294e-09	89.1909	3.91016e-09	89.1821	1.89855e-09
89.2862	4.82705e-09	89.2779	6.09154e-09	89.2909	3.29981e-09	89.2821	2.20372e-09
89.3862	4.61342e-09	89.3779	5.48119e-09	89.3909	3.29981e-09	89.3821	2.20372e-09
89.4862	4.21669e-09	89.4779	5.48119e-09	89.4909	3.91016e-09	89.4821	2.5089e-09
89.5862	3.81997e-09	89.5779	7.00707e-09	89.5909	3.60499e-09	89.5821	2.5089e-09
89.6862	3.60634e-09	89.6779	5.17601e-09	89.6909	4.21534e-09	89.6821	2.20372e-09
89.7862	3.51479e-09	89.7779	6.09154e-09	89.7909	3.91016e-09	89.7821	6.77845e-10
89.8862	3.57582e-09	89.8779	6.70189e-09	89.8909	2.38428e-09	89.8821	2.5089e-09
89.9862	3.42324e-09	89.9779	7.31224e-09	89.9909	6.04639e-09	89.9821	1.59337e-09
90.0862	3.60634e-09	90.0779	6.70189e-09	90.0909	5.43604e-09	90.0821	1.59337e-09
90.1862	3.27065e-09	90.1779	6.09154e-09	90.1909	3.91016e-09	90.1821	6.77845e-10
90.2862	2.6603e-09	90.2779	7.00707e-09	90.2909	3.91016e-09	90.2821	1.89855e-09
90.3862	2.29409e-09	90.3779	4.87084e-09	90.3909	4.52051e-09	90.3821	1.2882e-09
90.4862	1.95839e-09	90.4779	7.00707e-09	90.4909	3.60499e-09	90.4821	2.81408e-09
90.5862	2.50771e-09	90.5779	6.39671e-09	90.5909	3.60499e-09	90.5821	9.83021e-10
90.6862	2.29409e-09	90.6779	5.17601e-09	90.6909	3.29981e-09	90.6821	3.72669e-10
90.7862	1.95839e-09	90.7779	5.78636e-09	90.7909	2.38428e-09	90.7821	3.72669e-10
90.8862	2.01943e-09	90.8779	3.65013e-09	90.8909	3.60499e-09	90.8821	1.89855e-09
90.9862	1.68373e-09	90.9779	5.48119e-09	90.9909	3.91016e-09	90.9821	6.74933e-11
91.0862	1.71425e-09	91.0779	6.39671e-09	91.0909	1.77393e-09	91.0821	1.2882e-09
91.1862	1.40908e-09	91.1779	4.26048e-09	91.1909	3.29981e-09	91.1821	9.83021e-10
91.2862	1.40908e-09	91.2779	6.09154e-09	91.2909	3.29981e-09	91.2821	1.59337e-09
91.3862	1.19545e-09	91.3779	7.61742e-09	91.3909	3.91016e-09	91.3821	1.2882e-09
91.4862	1.37856e-09	91.4779	5.78636e-09	91.4909	3.29981e-09	91.4821	6.77845e-10
91.5862	1.86684e-09	91.5779	6.70189e-09	91.5909	3.29981e-09	91.5821	1.2882e-09
91.6862	2.1415e-09	91.6779	6.09154e-09	91.6909	2.38428e-09	91.6821	1.2882e-09
91.7862	2.35512e-09	91.7779	7.31224e-09	91.7909	4.82569e-09	91.7821	9.83021e-10
91.8862	2.38564e-09	91.8779	6.39671e-09	91.8909	2.99464e-09	91.8821	6.74933e-11
91.9862	2.53823e-09	91.9779	5.48119e-09	91.9909	2.99464e-09	91.9821	3.72669e-10
92.0862	2.29409e-09	92.0779	5.78636e-09	92.0909	2.99464e-09	92.0821	-1.15321e-09
92.1862	1.50063e-09	92.1779	4.56566e-09	92.1909	2.68946e-09	92.1821	-1.45839e-09
92.2862	1.95839e-09	92.2779	4.56566e-09	92.2909	1.77393e-09	92.2821	-2.37682e-10
92.3862	1.95839e-09	92.3779	4.56566e-09	92.3909	2.99464e-09	92.3821	-8.48034e-10
92.4862	2.04995e-09	92.4779	6.70189e-09	92.4909	1.77393e-09	92.4821	-5.42858e-10
92.5862	2.56874e-09	92.5779	5.48119e-09	92.5909	3.29981e-09	92.5821	-5.42858e-10
92.6862	1.83632e-09	92.6779	4.87084e-09	92.6909	1.46876e-09	92.6821	-1.45839e-09
92.7862	1.28701e-09	92.7779	3.95531e-09	92.7909	8.58405e-10	92.7821	-5.42858e-10
92.8862	7.98725e-10	92.8779	5.17601e-09	92.8909	1.16358e-09	92.8821	-2.37682e-10
92.9862	1.86684e-09	92.9779	6.09154e-09	92.9909	2.38428e-09	92.9821	-2.37391e-09
93.0862	1.77529e-09	93.0779	4.87084e-09	93.0909	1.77393e-09	93.0821	-1.15321e-09
93.1862	6.46137e-10	93.1779	4.56566e-09	93.1909	2.68946e-09	93.1821	-1.15321e-09
93.2862	5.54584e-10	93.2779	5.17601e-09	93.2909	2.99464e-09	93.2821	-2.06874e-09
93.3862	1.04287e-09	93.3779	7.31224e-09	93.3909	2.38428e-09	93.3821	-1.76356e-09
93.4862	1.31752e-09	93.4779	4.56566e-09	93.4909	8.58405e-10	93.4821	-2.37391e-09
93.5862	8.29243e-10	93.5779	4.87084e-09	93.5909	8.58405e-10	93.5821	-1.45839e-09
93.6862	8.5976e-10	93.6779	4.26048e-09	93.6909	8.58405e-10	93.6821	-2.37391e-09
93.7862	7.3769e-10	93.7779	3.65013e-09	93.7909	5.53229e-10	93.7821	-1.76356e-09
93.8862	5.85102e-10	93.8779	3.65013e-09	93.8909	5.53229e-10	93.8821	-1.76356e-09
93.9862	1.04287e-09	93.9779	4.26048e-09	93.9909	-9.7265e-10	93.9821	-2.06874e-09
94.0862	5.24067e-10	94.0779	3.03978e-09	94.0909	2.48053e-10	94.0821	-1.45839e-09
94.1862	1.88373e-10	94.1779	3.65013e-09	94.1909	-3.62298e-10	94.1821	-2.67909e-09
94.2862	1.27338e-10	94.2779	3.95531e-09	94.2909	2.48053e-10	94.2821	-2.37391e-09
94.3862	5.85102e-10	94.3779	3.95531e-09	94.3909	-5.71226e-11	94.3821	-2.67909e-09
94.4862	7.3769e-10	94.4779	3.03978e-09	94.4909	2.48053e-10	94.4821	-2.67909e-09
94.5862	7.07172e-10	94.5779	4.87084e-09	94.5909	2.07911e-09	94.5821	-2.98426e-09
94.6862	1.37856e-09	94.6779	4.56566e-09	94.6909	5.53229e-10	94.6821	-3.28944e-09
94.7862	2.49409e-10	94.7779	4.87084e-09	94.7909	1.46876e-09	94.7821	-2.67909e-09
94.8862	3.40961e-10	94.8779	2.42943e-09	94.8909	2.48053e-10	94.8821	-2.37391e-09
94.9862	4.32514e-10	94.9779	1.5139e-09	94.9909	-5.71226e-11	94.9821	-2.06874e-09
95.0862	3.71479e-10	95.0779	3.65013e-09	95.0909	-5.71226e-11	95.0821	-2.67909e-09
95.1862	-1.16802e-10	95.1779	4.26048e-09	95.1909	-3.62298e-10	95.1821	-1.15321e-09
95.2862	-1.1544e-09	95.2779	3.34496e-09	95.2909	-9.7265e-10	95.2821	-2.67909e-09
95.3862	-7.27154e-10	95.3779	4.87084e-09	95.3909	-3.62298e-10	95.3821	-2.37391e-09
95.4862	-5.74566e-10	95.4779	3.34496e-09	95.4909	-6.67474e-10	95.4821	-8.48034e-10
95.5862	-6.35601e-10	95.5779	4.56566e-09	95.5909	-1.583e-09	95.5821	-1.45839e-09
95.6862	-4.52496e-10	95.6779	3.65013e-09	95.6909	-5.71226e-11	95.6821	-3.28944e-09
95.7862	-3.30425e-10	95.7779	3.34496e-09	95.7909	-1.27783e-09	95.7821	-2.67909e-09
95.8862	-8.79742e-10	95.8779	2.73461e-09	95.8909	-2.19335e-09	95.8821	-2.98426e-09
95.9862	-6.96636e-10	95.9779	2.42943e-09	95.9909	-1.583e-09	95.9821	-2.67909e-09
96.0862	-5.44048e-10	96.0779	1.5139e-09	96.0909	5.53229e-10	96.0821	-3.59462e-09
96.1862	-1.06285e-09	96.1779	2.42943e-09	96.1909	-5.71226e-11	96.1821	-2.98426e-09
96.2862	-1.97837e-09	96.2779	2.42943e-09	96.2909	-1.88818e-09	96.2821	-2.37391e-09
96.3862	-2.46666e-09	96.3779	3.03978e-09	96.3909	-3.41406e-09	96.3821	-3.28944e-09
96.4862	-2.03941e-09	96.4779	5.98375e-10	96.4909	-1.583e-09	96.4821	-3.89979e-09
96.5862	-9.71295e-10	96.5779	1.81908e-09	96.5909	-1.88818e-09	96.5821	-2.98426e-09
96.6862	-1.1544e-09	96.6779	2.93199e-10	96.6909	-2.49853e-09	96.6821	-2.98426e-09
96.7862	-9.40777e-10	96.7779	-1.19769e-11	96.7909	-2.8037e-09	96.7821	-3.59462e-09
96.8862	-1.1544e-09	96.8779	2.93199e-10	96.8909	-2.19335e-09	96.8821	-3.28944e-09
96.9862	-1.36802e-09	96.9779	2.93199e-10	96.9909	-2.8037e-09	96.9821	-1.76356e-09
97.0862	-1.21544e-09	97.0779	9.0355e-10	97.0909	-1.88818e-09	97.0821	-2.67909e-09
97.1862	-1.82579e-09	97.1779	9.0355e-10	97.1909	-3.41406e-09	97.1821	-3.28944e-09
97.2862	-9.71295e-10	97.2779	9.0355e-10	97.2909	-1.88818e-09	97.2821	-3.28944e-09
97.3862	-9.10259e-10	97.3779	-9.27504e-10	97.3909	-2.19335e-09	97.3821	-2.37391e-09
97.4862	-1.21544e-09	97.4779	-3.17153e-10	97.4909	-1.88818e-09	97.4821	-3.28944e-09
97.5862	-1.49009e-09	97.5779	-3.17153e-10	97.5909	-4.02441e-09	97.5821	-3.89979e-09
97.6862	-7.88189e-10	97.6779	1.20873e-09	97.6909	-1.583e-09	97.6821	-2.98426e-09
97.7862	-1.21544e-09	97.7779	-6.22328e-10	97.7909	-2.49853e-09	97.7821	-3.28944e-09
97.8862	-1.49009e-09	97.8779	-3.17153e-10	97.8909	-2.49853e-09	97.8821	-2.98426e-09
97.9862	-1.79527e-09	97.9779	9.0355e-10	97.9909	-2.19335e-09	97.9821	-3.28944e-09
98.0862	-2.192e-09	98.0779	-1.23268e-09	98.0909	-3.10888e-09	98.0821	-3.59462e-09
98.1862	-1.55113e-09	98.1779	1.20873e-09	98.1909	-2.19335e-09	98.1821	-2.67909e-09
98.2862	-1.79527e-09	98.2779	-1.53786e-09	98.2909	-3.41406e-09	98.2821	-3.28944e-09
98.3862	-1.6732e-09	98.3779	-1.23268e-09	98.3909	-2.8037e-09	98.3821	-5.12049e-09
98.4862	-1.6732e-09	98.4779	-1.53786e-09	98.4909	-2.49853e-09	98.4821	-3.89979e-09
98.5862	-2.31407e-09	98.5779	-1.84303e-09	98.5909	-3.41406e-09	98.5821	-4.51014e-09
98.6862	-1.64268e-09	98.6779	-2.14821e-09	98.6909	-3.71923e-09	98.6821	-6.03602e-09
98.7862	-1.91734e-09	98.7779	-2.14821e-09	98.7909	-3.10888e-09	98.7821	-5.12049e-09
98.8862	-1.73423e-09	98.8779	-2.45338e-09	98.8909	-2.19335e-09	98.8821	-6.03602e-09
98.9862	-2.55821e-09	98.9779	-3.97926e-09	98.9909	-1.583e-09	98.9821	-5.42567e-09
99.0862	-2.34459e-09	99.0779	-2.14821e-09	99.0909	-3.10888e-09	99.0821	-6.64637e-09
99.1862	-2.31407e-09	99.1779	-4.89479e-09	99.1909	-4.93994e-09	99.1821	-4.81532e-09
99.2862	-2.192e-09	99.2779	-3.67409e-09	99.2909	-2.49853e-09	99.2821	-6.95155e-09
99.3862	-2.22252e-09	99.3779	-2.45338e-09	99.3909	-4.93994e-09	99.3821	-6.3412e-09
99.4862	-2.77183e-09	99.4779	-2.45338e-09	99.4909	-2.49853e-09	99.4821	-5.73085e-09
99.5862	-2.58873e-09	99.5779	-1.84303e-09	99.5909	-2.8037e-09	99.5821	-6.3412e-09
99.6862	-2.49717e-09	99.6779	-3.36891e-09	99.6909	-3.41406e-09	99.6821	-6.3412e-09
99.7862	-2.8939e-09	99.7779	-1.23268e-09	99.7909	-3.41406e-09	99.7821	-6.03602e-09
99.8862	-3.04649e-09	99.8779	-1.53786e-09	99.8909	-2.8037e-09	99.8821	-5.73085e-09
99.9862	-2.83287e-09	99.9779	-3.06373e-09	99.9909	-4.32958e-09	99.9821	-6.95155e-09
100.086	-3.19908e-09	100.078	-3.36891e-09	100.091	-2.8037e-09	100.082	-6.3412e-09
100.186	-2.8939e-09	100.178	-1.84303e-09	100.191	-4.63476e-09	100.182	5.86583e-09
100.286	-2.95494e-09	100.278	-3.36891e-09	100.291	7.62368e-08	100.282	1.99039e-08
100.386	-2.31407e-09	100.378	7.84182e-08	100.391	9.33267e-08	100.382	2.72281e-08
100.486	-2.34459e-09	100.478	9.67287e-08	100.491	1.04313e-07	100.482	3.33317e-08
100.586	-2.49717e-09	100.578	1.06189e-07	100.591	1.11637e-07	100.582	3.72989e-08
100.686	-2.40562e-09	100.678	1.14429e-07	100.691	1.20182e-07	100.682	4.30973e-08
100.786	-2.86338e-09	100.778	1.19922e-07	100.791	1.23539e-07	100.782	4.82853e-08
100.886	-2.46666e-09	100.878	1.2572e-07	100.891	1.28422e-07	100.882	5.07267e-08
100.986	-3.07701e-09	100.978	1.30908e-07	100.991	1.32389e-07	100.982	5.49991e-08
101.086	-2.86338e-09	101.078	1.35181e-07	101.091	1.36356e-07	101.082	5.92716e-08
101.186	-2.16148e-09	101.178	1.38538e-07	101.191	1.40934e-07	101.182	6.20182e-08
101.286	-2.13096e-09	101.278	1.4281e-07	101.291	1.46427e-07	101.282	6.59855e-08
101.386	-1.91734e-09	101.378	1.47388e-07	101.391	1.47343e-07	101.382	6.84269e-08
101.486	-1.91734e-09	101.478	1.47998e-07	101.491	1.52226e-07	101.482	7.02579e-08
101.586	-2.40562e-09	101.578	1.50745e-07	101.591	1.55888e-07	101.582	7.42252e-08
101.686	-1.73423e-09	101.678	1.53797e-07	101.691	1.59855e-07	101.682	7.57511e-08
101.786	-2.00889e-09	101.778	1.57154e-07	101.791	1.61991e-07	101.782	7.78873e-08
101.886	-1.88682e-09	101.878	1.62036e-07	101.891	1.66874e-07	101.882	7.9108e-08
101.986	-2.46666e-09	101.978	1.62952e-07	101.991	1.68095e-07	101.982	7.88028e-08
102.086	-1.97837e-09	102.078	1.6814e-07	102.091	1.70536e-07	102.082	8.09391e-08
102.186	-1.61216e-09	102.178	1.70276e-07	102.191	1.74503e-07	102.182	8.46012e-08
102.286	-1.79527e-09	102.278	1.73023e-07	102.291	1.76945e-07	102.282	8.55167e-08
102.386	-2.25303e-09	102.378	1.76074e-07	102.391	1.80912e-07	102.382	8.67374e-08
102.486	-2.10044e-09	102.478	1.78516e-07	102.491	1.83964e-07	102.482	8.9484e-08
102.586	-1.76475e-09	102.578	1.77295e-07	102.591	1.8549e-07	102.582	9.07047e-08
102.686	-2.10044e-09	102.678	1.84009e-07	102.691	1.87321e-07	102.682	9.25358e-08
102.786	-1.79527e-09	102.778	1.86145e-07	102.791	1.90983e-07	102.782	9.37565e-08
102.886	-1.30699e-09	102.878	1.8645e-07	102.891	1.93119e-07	102.882	9.68082e-08
102.986	-8.49224e-10	102.978	1.89502e-07	102.991	1.96476e-07	102.982	9.80289e-08
103.086	-8.18707e-10	103.078	1.9469e-07	103.091	1.96781e-07	103.082	9.95548e-08
103.186	-1.58165e-09	103.178	1.96216e-07	103.191	2.01054e-07	103.182	1.0047e-07
103.286	-1.88682e-09	103.278	1.98352e-07	103.291	2.02885e-07	103.282	1.01386e-07
103.386	-1.55113e-09	103.378	1.99268e-07	103.391	2.05326e-07	103.382	1.01996e-07
103.486	-1.61216e-09	103.478	2.01404e-07	103.491	2.08073e-07	103.482	1.03217e-07
103.586	-1.18492e-09	103.578	2.02625e-07	103.591	2.07157e-07	103.582	1.03522e-07
103.686	-9.71295e-10	103.678	2.0354e-07	103.691	2.10209e-07	103.682	1.03827e-07
103.786	-1.58165e-09	103.778	2.03845e-07	103.791	2.1204e-07	103.782	1.04743e-07
103.886	-1.58165e-09	103.878	2.05676e-07	103.891	2.13261e-07	103.882	1.06269e-07
103.986	-9.71295e-10	103.978	2.07813e-07	103.991	2.14787e-07	103.982	1.06269e-07
104.086	-1.18492e-09	104.078	2.10559e-07	104.091	2.16007e-07	104.082	1.07795e-07
104.186	-8.79742e-10	104.178	2.12085e-07	104.191	2.18144e-07	104.182	1.09015e-07
104.286	-1.09336e-09	104.278	2.13916e-07	104.291	2.2089e-07	104.282	1.0932e-07
104.386	-8.79742e-10	104.378	2.15442e-07	104.391	2.215e-07	104.382	1.10541e-07
104.486	-6.35601e-10	104.478	2.16663e-07	104.491	2.22416e-07	104.482	1.12677e-07
104.586	-2.52496e-11	104.578	2.17273e-07	104.591	2.25163e-07	104.582	1.12983e-07
104.686	-1.4732e-10	104.678	2.19715e-07	104.691	2.26078e-07	104.682	1.14203e-07
104.786	6.63031e-11	104.778	2.20935e-07	104.791	2.2852e-07	104.782	1.16339e-07
104.886	7.98725e-10	104.878	2.21851e-07	104.891	2.30351e-07	104.882	1.16339e-07
104.986	1.22597e-09	104.978	2.25513e-07	104.991	2.30961e-07	104.982	1.18171e-07
105.086	4.93549e-10	105.078	2.26428e-07	105.091	2.30656e-07	105.082	1.19696e-07
105.186	5.26793e-12	105.178	2.30091e-07	105.191	2.32792e-07	105.182	1.20612e-07
105.286	6.46137e-10	105.278	2.32227e-07	105.291	2.33708e-07	105.282	1.21527e-07
105.386	1.56166e-09	105.378	2.34058e-07	105.391	2.34013e-07	105.382	1.23969e-07
105.486	1.22597e-09	105.478	2.35889e-07	105.491	2.34928e-07	105.482	1.24274e-07
105.586	1.53115e-09	105.578	2.34973e-07	105.591	2.36759e-07	105.582	1.24884e-07
105.686	2.41616e-09	105.678	2.34668e-07	105.691	2.3737e-07	105.682	1.258e-07
105.786	2.29409e-09	105.778	2.31922e-07	105.791	2.39201e-07	105.782	1.27021e-07
105.886	2.17202e-09	105.878	2.2948e-07	105.891	2.38896e-07	105.882	1.27326e-07
105.986	2.75185e-09	105.978	2.29175e-07	105.991	2.40421e-07	105.982	1.28546e-07
106.086	2.53823e-09	106.078	2.30396e-07	106.091	2.40727e-07	106.082	1.28852e-07
106.186	2.72133e-09	106.178	2.30396e-07	106.191	2.42252e-07	106.182	1.30072e-07
106.286	3.14858e-09	106.278	2.33142e-07	106.291	2.42863e-07	106.282	1.31903e-07
106.386	3.91152e-09	106.378	2.35584e-07	106.391	2.43778e-07	106.382	1.34345e-07
106.486	4.03359e-09	106.478	2.36804e-07	106.491	2.44084e-07	106.482	1.33124e-07
106.586	3.60634e-09	106.578	2.36499e-07	106.591	2.46525e-07	106.582	1.35871e-07
106.686	3.42324e-09	106.678	2.36804e-07	106.691	2.4744e-07	106.682	1.37091e-07
106.786	4.52187e-09	106.778	2.34363e-07	106.791	2.47746e-07	106.782	1.37091e-07
106.886	4.70497e-09	106.878	2.33447e-07	106.891	2.4744e-07	106.882	1.38922e-07
106.986	5.49843e-09	106.978	2.31922e-07	106.991	2.47746e-07	106.982	1.39533e-07
107.086	5.49843e-09	107.078	2.32837e-07	107.091	2.47135e-07	107.082	1.40143e-07
107.186	5.19326e-09	107.178	2.31311e-07	107.191	2.50187e-07	107.182	1.42585e-07
107.286	5.22377e-09	107.278	2.32532e-07	107.291	2.49882e-07	107.282	1.4289e-07
107.386	5.6205e-09	107.378	2.31006e-07	107.391	2.48966e-07	107.382	1.43805e-07
107.486	6.41396e-09	107.478	2.29175e-07	107.491	2.51408e-07	107.482	1.43805e-07
107.586	6.71914e-09	107.578	2.2887e-07	107.591	2.51408e-07	107.582	1.44416e-07
107.686	7.60414e-09	107.678	2.27954e-07	107.691	2.53239e-07	107.682	1.45636e-07
107.786	6.53603e-09	107.778	2.2887e-07	107.791	2.52628e-07	107.782	1.46247e-07
107.886	7.23793e-09	107.878	2.27039e-07	107.891	2.53849e-07	107.882	1.45942e-07
107.986	6.71914e-09	107.978	2.27649e-07	107.991	2.52934e-07	107.982	1.45636e-07
108.086	7.57363e-09	108.078	2.30091e-07	108.091	2.54459e-07	108.082	1.47467e-07
108.186	6.96328e-09	108.178	2.34668e-07	108.191	2.53239e-07	108.182	1.48078e-07
108.286	7.66518e-09	108.278	2.33753e-07	108.291	2.53544e-07	108.282	1.48078e-07
108.386	8.2145e-09	108.378	2.30701e-07	108.391	2.54765e-07	108.382	1.47773e-07
108.486	8.18398e-09	108.478	2.2948e-07	108.491	2.54154e-07	108.482	1.49604e-07
108.586	8.67226e-09	108.578	2.30701e-07	108.591	2.53239e-07	108.582	1.49604e-07
108.686	9.83193e-09	108.678	2.31616e-07	108.691	2.54459e-07	108.682	1.5113e-07
108.786	9.80141e-09	108.778	2.32837e-07	108.791	2.54765e-07	108.782	1.5113e-07
108.886	9.77089e-09	108.878	2.32227e-07	108.891	2.56901e-07	108.882	1.52961e-07
108.986	1.0015e-08	108.978	2.29175e-07	108.991	2.55985e-07	108.982	1.55097e-07
109.086	1.04423e-08	109.078	2.30091e-07	109.091	2.5568e-07	109.082	1.55402e-07
109.186	1.10526e-08	109.178	2.31006e-07	109.191	2.57816e-07	109.182	1.57538e-07
109.286	1.07475e-08	109.278	2.32227e-07	109.291	2.57816e-07	109.282	1.58454e-07
109.386	8.82485e-09	109.378	2.36804e-07	109.391	2.58732e-07	109.382	1.60285e-07
109.486	8.7333e-09	109.478	2.36194e-07	109.491	2.59037e-07	109.482	1.59674e-07
109.586	1.05033e-08	109.578	2.33142e-07	109.591	2.58427e-07	109.582	1.62116e-07
109.686	1.07475e-08	109.678	2.35279e-07	109.691	2.59037e-07	109.682	1.62116e-07
109.786	1.11747e-08	109.778	2.34973e-07	109.791	2.59037e-07	109.782	1.63947e-07
109.886	1.09611e-08	109.878	2.3772e-07	109.891	2.60868e-07	109.882	1.65168e-07
109.986	1.15409e-08	109.978	2.40772e-07	109.991	2.61479e-07	109.982	1.46247e-07
110.086	1.18156e-08	110.078	2.44739e-07	110.091	2.62699e-07	110.082	1.37091e-07
110.186	1.19376e-08	110.178	2.49622e-07	110.191	2.61784e-07	110.182	1.31293e-07
110.286	1.19376e-08	110.278	2.56336e-07	110.291	2.62394e-07	110.282	1.29462e-07
110.386	1.18766e-08	110.378	2.10559e-07	110.391	2.65141e-07	110.382	1.24579e-07
110.486	1.10526e-08	110.478	1.87366e-07	110.491	2.18754e-07	110.482	1.23359e-07
110.586	1.05643e-08	110.578	1.74549e-07	110.591	2.02274e-07	110.582	1.20307e-07
110.686	1.04118e-08	110.678	1.61121e-07	110.691	1.95866e-07	110.682	1.17865e-07
110.786	1.01676e-08	110.778	1.54712e-07	110.791	1.90678e-07	110.782	1.14814e-07
110.886	1.0015e-08	110.878	1.48914e-07	110.891	1.85795e-07	110.882	1.12983e-07
110.986	9.40468e-09	110.978	1.43421e-07	110.991	1.80607e-07	110.982	1.09626e-07
111.086	9.40468e-09	111.078	1.40064e-07	111.091	1.78471e-07	111.082	1.06879e-07
111.186	9.55727e-09	111.178	1.37317e-07	111.191	1.73588e-07	111.182	1.03217e-07
111.286	9.40468e-09	111.278	1.34265e-07	111.291	1.71146e-07	111.282	1.01996e-07
111.386	9.22158e-09	111.378	1.30298e-07	111.391	1.66874e-07	111.382	9.92496e-08
111.486	8.79433e-09	111.478	1.29993e-07	111.491	1.61991e-07	111.482	9.68082e-08
111.586	8.9164e-09	111.578	1.28772e-07	111.591	1.59245e-07	111.582	9.55875e-08
111.686	8.06191e-09	111.678	1.2511e-07	111.691	1.54667e-07	111.682	9.37565e-08
111.786	8.30605e-09	111.778	1.22058e-07	111.791	1.52836e-07	111.782	9.28409e-08
111.886	8.24501e-09	111.878	1.19922e-07	111.891	1.48563e-07	111.882	8.85685e-08
111.986	8.48915e-09	111.978	1.18396e-07	111.991	1.4246e-07	111.982	8.73478e-08
112.086	8.55019e-09	112.078	1.14734e-07	112.091	1.39713e-07	112.082	8.64322e-08
112.186	8.27553e-09	112.178	1.15039e-07	112.191	1.36051e-07	112.182	8.39908e-08
112.286	8.42812e-09	112.278	1.13819e-07	112.291	1.34525e-07	112.282	8.52115e-08
112.386	8.18398e-09	112.378	1.09546e-07	112.391	1.30863e-07	112.382	8.27701e-08
112.486	7.60414e-09	112.478	1.08325e-07	112.491	1.28117e-07	112.482	8.12443e-08
112.586	6.35292e-09	112.578	1.07715e-07	112.591	1.27201e-07	112.582	8.18546e-08
112.686	6.90224e-09	112.678	1.06189e-07	112.691	1.22929e-07	112.682	7.81925e-08
112.786	6.10878e-09	112.778	1.05579e-07	112.791	1.21403e-07	112.782	7.81925e-08
112.886	5.55947e-09	112.878	1.04663e-07	112.891	1.18351e-07	112.882	7.60563e-08
112.986	4.94912e-09	112.978	1.04358e-07	112.991	1.1591e-07	112.982	7.57511e-08
113.086	5.77309e-09	113.078	1.03137e-07	113.091	1.13773e-07	113.082	7.42252e-08
113.186	6.74965e-09	113.178	1.01917e-07	113.191	1.12553e-07	113.182	7.26993e-08
113.286	6.50551e-09	113.278	9.85598e-08	113.291	1.07975e-07	113.282	7.17838e-08
113.386	6.87172e-09	113.378	9.85598e-08	113.391	1.04923e-07	113.382	7.08683e-08
113.486	6.84121e-09	113.478	9.58132e-08	113.491	1.04618e-07	113.482	7.08683e-08
113.586	6.10878e-09	113.578	9.48977e-08	113.591	1.01872e-07	113.582	6.90372e-08
113.686	5.9562e-09	113.678	9.18459e-08	113.691	1.02177e-07	113.682	6.81217e-08
113.786	5.68154e-09	113.778	9.06252e-08	113.791	9.88198e-08	113.782	6.6901e-08
113.886	5.28481e-09	113.878	8.90994e-08	113.891	9.88198e-08	113.882	6.75113e-08
113.986	4.85756e-09	113.978	8.69631e-08	113.991	9.54629e-08	113.982	6.59855e-08
114.086	4.24721e-09	114.078	8.48269e-08	114.091	9.51577e-08	114.082	6.59855e-08
114.186	4.9186e-09	114.178	8.29958e-08	114.191	9.2106e-08	114.182	6.41544e-08
114.286	3.881e-09	114.278	8.11648e-08	114.291	9.30215e-08	114.282	6.38492e-08
114.386	3.60634e-09	114.378	8.147e-08	114.391	9.11904e-08	114.382	6.23234e-08
114.486	3.05703e-09	114.478	8.45217e-08	114.491	9.05801e-08	114.482	6.23234e-08
114.586	3.45375e-09	114.578	8.147e-08	114.591	8.84439e-08	114.582	6.11026e-08
114.686	4.06411e-09	114.678	7.96389e-08	114.691	8.72232e-08	114.682	6.07975e-08
114.786	3.78945e-09	114.778	7.78078e-08	114.791	8.60024e-08	114.782	6.04923e-08
114.886	3.63686e-09	114.878	7.47561e-08	114.891	8.41714e-08	114.882	5.92716e-08
114.986	3.78945e-09	114.978	7.13992e-08	114.991	8.14248e-08	114.982	5.89664e-08
115.086	3.78945e-09	115.078	6.89577e-08	115.091	7.92886e-08	115.082	5.77457e-08
115.186	3.60634e-09	115.178	6.98733e-08	115.191	7.83731e-08	115.182	5.6525e-08
115.286	2.99599e-09	115.278	6.89577e-08	115.291	7.56265e-08	115.282	5.80509e-08
115.386	3.63686e-09	115.378	6.92629e-08	115.391	7.44058e-08	115.382	5.74405e-08
115.486	3.60634e-09	115.478	6.86526e-08	115.491	7.34902e-08	115.482	5.62198e-08
115.586	2.38564e-09	115.578	6.5906e-08	115.591	7.04385e-08	115.582	5.49991e-08
115.686	2.44667e-09	115.678	6.31594e-08	115.691	6.98281e-08	115.682	5.4694e-08
115.786	2.81289e-09	115.778	6.04128e-08	115.791	6.89126e-08	115.782	5.28629e-08
115.886	2.8434e-09	115.878	5.67507e-08	115.891	6.86074e-08	115.882	5.34733e-08
115.986	2.90444e-09	115.978	5.33938e-08	115.991	6.86074e-08	115.982	5.37784e-08
116.086	2.90444e-09	116.078	5.0342e-08	116.091	6.67764e-08	116.082	5.28629e-08
116.186	2.6603e-09	116.178	5.12576e-08	116.191	6.64712e-08	116.182	5.22526e-08
116.286	2.38564e-09	116.278	4.91213e-08	116.291	6.52505e-08	116.282	5.22526e-08
116.386	2.35512e-09	116.378	4.54592e-08	116.391	6.64712e-08	116.382	5.1337e-08
116.486	1.53115e-09	116.478	4.24075e-08	116.491	6.55557e-08	116.482	4.98111e-08
116.586	5.85102e-10	116.578	4.21023e-08	116.591	6.34194e-08	116.582	4.92008e-08
116.686	-2.38873e-10	116.678	4.21023e-08	116.691	6.55557e-08	116.682	4.98111e-08
116.786	-1.77838e-10	116.778	3.93557e-08	116.791	6.25039e-08	116.782	4.98111e-08
116.886	3.57855e-11	116.878	3.99661e-08	116.891	6.37246e-08	116.882	4.82853e-08
116.986	-2.08355e-10	116.978	3.66091e-08	116.991	6.31143e-08	116.982	4.76749e-08
117.086	-4.52496e-10	117.078	3.8135e-08	117.091	6.21987e-08	117.082	4.70646e-08
117.186	8.29243e-10	117.178	3.56936e-08	117.191	6.25039e-08	117.182	4.79801e-08
117.286	1.47011e-09	117.278	3.72195e-08	117.291	6.18936e-08	117.282	4.73697e-08
117.386	6.15619e-10	117.378	3.59988e-08	117.391	6.0978e-08	117.382	4.6149e-08
117.486	2.49409e-10	117.478	3.2947e-08	117.491	5.88418e-08	117.482	4.52335e-08
117.586	2.79926e-10	117.578	3.63039e-08	117.591	5.9147e-08	117.582	4.55387e-08
117.686	4.01996e-10	117.678	3.35574e-08	117.691	5.67056e-08	117.682	4.4318e-08
117.786	3.71479e-10	117.778	3.26418e-08	117.791	5.67056e-08	117.782	4.52335e-08
117.886	8.29243e-10	117.878	3.26418e-08	117.891	5.60952e-08	117.882	4.52335e-08
117.986	7.68207e-10	117.978	3.35574e-08	117.991	5.64004e-08	117.982	4.37076e-08
118.086	7.68207e-10	118.078	3.44729e-08	118.091	5.42642e-08	118.082	4.4318e-08
118.186	7.3769e-10	118.178	3.47781e-08	118.191	5.54849e-08	118.182	4.27921e-08
118.286	5.85102e-10	118.278	3.44729e-08	118.291	6.79971e-08	118.282	4.27921e-08
118.386	7.98725e-10	118.378	3.38625e-08	118.391	7.04385e-08	118.382	4.12662e-08
118.486	2.18891e-10	118.478	3.2947e-08	118.491	7.68472e-08	118.482	4.18766e-08
118.586	5.24067e-10	118.578	3.56936e-08	118.591	8.08145e-08	118.582	4.15714e-08
118.686	-4.21978e-10	118.678	3.44729e-08	118.691	9.69888e-08	118.682	4.15714e-08
118.786	9.68207e-11	118.778	3.26418e-08	118.791	1.09196e-07	118.782	4.18766e-08
118.886	-2.6939e-10	118.878	3.14211e-08	118.891	1.1652e-07	118.882	4.06559e-08
118.986	-6.35601e-10	118.978	3.08108e-08	118.991	1.20182e-07	118.982	3.94352e-08
119.086	-1.27647e-09	119.078	2.98952e-08	119.091	1.00041e-07	119.082	3.94352e-08
119.186	-2.03941e-09	119.178	2.71487e-08	119.191	8.11196e-08	119.182	4.03507e-08
119.286	-8.49224e-10	119.278	2.56228e-08	119.291	7.59316e-08	119.282	3.94352e-08
119.386	-5.74566e-10	119.378	2.47073e-08	119.391	7.10488e-08	119.382	3.85196e-08
119.486	-9.40777e-10	119.478	2.68435e-08	119.491	6.86074e-08	119.482	3.913e-08
119.586	-9.10259e-10	119.578	2.68435e-08	119.591	6.49453e-08	119.582	3.85196e-08
119.686	-1.09336e-09	119.678	2.50124e-08	119.691	6.31143e-08	119.682	3.82145e-08
119.786	-7.57672e-10	119.778	2.65383e-08	119.791	6.25039e-08	119.782	3.82145e-08
119.886	-1.18492e-09	119.878	2.56228e-08	119.891	6.0978e-08	119.882	3.94352e-08
119.986	-2.03941e-09	119.978	3.69143e-08	119.991	6.0978e-08	119.982	3.913e-08
120.086	-3.56529e-09	120.078	9.94753e-08	120.091	6.00625e-08	120.082	3.79093e-08
120.186	-2.34459e-09	120.178	1.10767e-07	120.191	5.82315e-08	120.182	4.6149e-08
120.286	-2.06993e-09	120.278	1.18701e-07	120.291	5.54849e-08	120.282	6.20182e-08
120.386	-2.10044e-09	120.378	1.26636e-07	120.391	5.48745e-08	120.382	7.08683e-08
120.486	-1.97837e-09	120.478	1.30298e-07	120.491	5.30435e-08	120.482	7.63614e-08
120.586	-1.79527e-09	120.578	1.36402e-07	120.591	5.15176e-08	120.582	8.21598e-08
120.686	-1.00181e-09	120.678	1.40674e-07	120.691	5.24331e-08	120.682	8.52115e-08
120.786	-6.35601e-10	120.778	1.48609e-07	120.791	5.15176e-08	120.782	8.9484e-08
120.886	-1.16802e-10	120.878	1.52881e-07	120.891	5.12124e-08	120.882	9.4672e-08
120.986	-1.09336e-09	120.978	1.59595e-07	120.991	5.09072e-08	120.982	9.49772e-08
121.086	4.32514e-10	121.078	1.64783e-07	121.091	4.8771e-08	121.082	9.74186e-08
121.186	8.29243e-10	121.178	1.69666e-07	121.191	7.53213e-08	121.182	9.95548e-08
121.286	1.22597e-09	121.278	1.72718e-07	121.291	1.22318e-07	121.282	1.01691e-07
121.386	1.65322e-09	121.378	1.77295e-07	121.391	1.33915e-07	121.382	1.04438e-07
121.486	1.65322e-09	121.478	1.78821e-07	121.491	1.4307e-07	121.482	1.06574e-07
121.586	5.24067e-10	121.578	1.79737e-07	121.591	1.49784e-07	121.582	1.081e-07
121.686	1.50063e-09	121.678	1.81262e-07	121.691	1.55277e-07	121.682	1.11762e-07
121.786	1.83632e-09	121.778	1.84925e-07	121.791	1.60465e-07	121.782	1.13593e-07
121.886	1.53115e-09	121.878	1.84925e-07	121.891	1.67484e-07	121.882	1.15729e-07
121.986	1.65322e-09	121.978	1.84619e-07	121.991	1.70536e-07	121.982	1.17865e-07
122.086	1.25649e-09	122.078	1.86145e-07	122.091	1.74809e-07	122.082	1.20307e-07
122.186	9.20795e-10	122.178	1.87976e-07	122.191	1.78471e-07	122.182	1.22748e-07
122.286	2.3246e-09	122.278	1.89502e-07	122.291	1.83048e-07	122.282	1.258e-07
122.386	1.6227e-09	122.378	1.90723e-07	122.391	1.85185e-07	122.382	1.2641e-07
122.486	1.43959e-09	122.478	1.9408e-07	122.491	1.89457e-07	122.482	1.27936e-07
122.586	2.59926e-09	122.578	1.95301e-07	122.591	1.91593e-07	122.582	1.29462e-07
122.686	3.42324e-09	122.678	1.99268e-07	122.691	1.93729e-07	122.682	1.32209e-07
122.786	3.72841e-09	122.778	2.00794e-07	122.791	1.9495e-07	122.782	1.33124e-07
122.886	3.66738e-09	122.878	2.04151e-07	122.891	1.99833e-07	122.882	1.34345e-07
122.986	3.94204e-09	122.978	2.04761e-07	122.991	2.01054e-07	122.982	1.36481e-07
123.086	4.46083e-09	123.078	2.06592e-07	123.091	2.02274e-07	123.082	1.37091e-07
123.186	4.61342e-09	123.178	2.06592e-07	123.191	2.04716e-07	123.182	1.38617e-07
123.286	5.07119e-09	123.278	2.07508e-07	123.291	2.07157e-07	123.282	1.41364e-07
123.386	4.67446e-09	123.378	2.08118e-07	123.391	2.07157e-07	123.382	1.40754e-07
123.486	5.34584e-09	123.478	2.08728e-07	123.491	2.08378e-07	123.482	1.40754e-07
123.586	5.89516e-09	123.578	2.09033e-07	123.591	2.09599e-07	123.582	1.41669e-07
123.686	6.47499e-09	123.678	2.09644e-07	123.691	2.09904e-07	123.682	1.41059e-07
123.786	6.38344e-09	123.778	2.09033e-07	123.791	2.12345e-07	123.782	1.41974e-07
123.886	6.01723e-09	123.878	2.10864e-07	123.891	2.11735e-07	123.882	1.4411e-07
123.986	6.47499e-09	123.978	2.1239e-07	123.991	2.13261e-07	123.982	1.435e-07
124.086	6.6581e-09	124.078	2.12085e-07	124.091	2.13261e-07	124.082	1.44721e-07
124.186	7.08535e-09	124.178	2.15137e-07	124.191	2.16007e-07	124.182	1.45026e-07
124.286	6.62758e-09	124.278	2.16358e-07	124.291	2.16007e-07	124.282	1.44721e-07
124.386	7.97036e-09	124.378	2.2002e-07	124.391	2.18144e-07	124.382	1.47467e-07
124.486	6.87172e-09	124.478	2.21546e-07	124.491	2.18754e-07	124.482	1.46552e-07
124.586	6.84121e-09	124.578	2.23072e-07	124.591	2.20585e-07	124.582	1.48078e-07
124.686	6.71914e-09	124.678	2.23682e-07	124.691	2.23026e-07	124.682	1.49909e-07
124.786	7.72622e-09	124.778	2.23682e-07	124.791	2.26383e-07	124.782	1.49909e-07
124.886	8.61122e-09	124.878	2.26734e-07	124.891	2.24857e-07	124.882	1.49604e-07
124.986	8.30605e-09	124.978	2.2826e-07	124.991	2.26383e-07	124.982	1.52045e-07
125.086	8.09243e-09	125.078	2.28565e-07	125.091	2.2852e-07	125.082	1.5235e-07
125.186	8.06191e-09	125.178	2.31006e-07	125.191	2.32182e-07	125.182	1.55097e-07
125.286	9.09951e-09	125.278	2.31006e-07	125.291	2.32182e-07	125.282	1.55402e-07
125.386	9.58779e-09	125.378	2.32227e-07	125.391	2.32792e-07	125.382	1.56012e-07
125.486	1.05033e-08	125.478	2.33753e-07	125.491	2.34928e-07	125.482	1.59064e-07
125.586	1.01066e-08	125.578	2.34973e-07	125.591	2.34623e-07	125.582	1.57843e-07
125.686	1.00761e-08	125.678	2.3711e-07	125.691	2.34318e-07	125.682	1.59369e-07
125.786	1.03507e-08	125.778	2.35889e-07	125.791	2.34928e-07	125.782	1.60895e-07
125.886	1.06254e-08	125.878	2.38635e-07	125.891	2.36149e-07	125.882	1.61505e-07
125.986	1.03507e-08	125.978	2.39856e-07	125.991	2.33708e-07	125.982	1.62116e-07
126.086	1.0015e-08	126.078	2.40161e-07	126.091	2.34623e-07	126.082	1.63031e-07
126.186	9.954e-09	126.178	2.40161e-07	126.191	2.34318e-07	126.182	1.64557e-07
126.286	1.07169e-08	126.278	2.42298e-07	126.291	2.35539e-07	126.282	1.65473e-07
126.386	1.02592e-08	126.378	2.43518e-07	126.391	2.3798e-07	126.382	1.67609e-07
126.486	1.11747e-08	126.478	2.45655e-07	126.491	2.39201e-07	126.482	1.67914e-07
126.586	1.11137e-08	126.578	2.45349e-07	126.591	2.40727e-07	126.582	1.69745e-07
126.686	1.16935e-08	126.678	2.47791e-07	126.691	2.42558e-07	126.682	1.72492e-07
126.786	1.11137e-08	126.778	2.49011e-07	126.791	2.43473e-07	126.782	1.73102e-07
126.886	1.08085e-08	126.878	2.48401e-07	126.891	2.45304e-07	126.882	1.74933e-07
126.986	1.09306e-08	126.978	2.50843e-07	126.991	2.44694e-07	126.982	1.74933e-07
127.086	1.23649e-08	127.078	2.53589e-07	127.091	2.4683e-07	127.082	1.75544e-07
127.186	1.2487e-08	127.178	2.53894e-07	127.191	2.48966e-07	127.182	1.76154e-07
127.286	1.13883e-08	127.278	2.56641e-07	127.291	2.48051e-07	127.282	1.76764e-07
127.386	1.20597e-08	127.378	2.56946e-07	127.391	2.49882e-07	127.382	1.77985e-07
127.486	1.11442e-08	127.478	2.58472e-07	127.491	2.51713e-07	127.482	1.80426e-07
127.586	1.12968e-08	127.578	2.59998e-07	127.591	2.51103e-07	127.582	1.7829e-07
127.686	1.10221e-08	127.678	2.59998e-07	127.691	2.52018e-07	127.682	1.81037e-07
127.786	1.07475e-08	127.778	2.61218e-07	127.791	2.52323e-07	127.782	1.79206e-07
127.886	1.06254e-08	127.878	2.62134e-07	127.891	2.5568e-07	127.882	1.80732e-07
127.986	1.08085e-08	127.978	2.62134e-07	127.991	2.52934e-07	127.982	1.80121e-07
128.086	1.21207e-08	128.078	2.6427e-07	128.091	2.5507e-07	128.082	1.81647e-07
128.186	1.32499e-08	128.178	2.65186e-07	128.191	2.56901e-07	128.182	1.81952e-07
128.286	1.29447e-08	128.278	2.65186e-07	128.291	2.56901e-07	128.282	1.82257e-07
128.386	1.33414e-08	128.378	2.66101e-07	128.391	2.56596e-07	128.382	1.82563e-07
128.486	1.30058e-08	128.478	2.6366e-07	128.491	2.57511e-07	128.482	1.85004e-07
128.586	1.3494e-08	128.578	2.65796e-07	128.591	2.59647e-07	128.582	1.83173e-07
128.686	1.35551e-08	128.678	2.66101e-07	128.691	2.58427e-07	128.682	1.82563e-07
128.786	1.30363e-08	128.778	2.68543e-07	128.791	2.57511e-07	128.782	1.80732e-07
128.886	1.38908e-08	128.878	2.68848e-07	128.891	2.58732e-07	128.882	1.82257e-07
128.986	1.38297e-08	128.978	2.69458e-07	128.991	2.58732e-07	128.982	1.83173e-07
129.086	1.39823e-08	129.078	2.70374e-07	129.091	2.59342e-07	129.082	1.82257e-07
129.186	1.39213e-08	129.178	2.71289e-07	129.191	2.60868e-07	129.182	1.85309e-07
129.286	1.40739e-08	129.278	2.71289e-07	129.291	2.60868e-07	129.282	1.85309e-07
129.386	1.42875e-08	129.378	2.71594e-07	129.391	2.60868e-07	129.382	1.86835e-07
129.486	1.43485e-08	129.478	2.719e-07	129.491	2.61479e-07	129.482	1.88056e-07
129.586	1.42265e-08	129.578	2.71289e-07	129.591	2.62089e-07	129.582	1.88971e-07
129.686	1.4318e-08	129.678	2.72205e-07	129.691	2.6392e-07	129.682	1.88056e-07
129.786	1.30668e-08	129.778	2.70679e-07	129.791	2.63615e-07	129.782	1.8592e-07
129.886	1.39518e-08	129.878	2.72815e-07	129.891	2.6453e-07	129.882	1.79816e-07
129.986	1.40434e-08	129.978	2.71289e-07	129.991	2.66667e-07	129.982	1.56623e-07
130.086	1.38297e-08	130.078	2.71289e-07	130.091	2.44389e-07	130.082	1.45026e-07
130.186	1.4257e-08	130.178	2.56031e-07	130.191	2.05021e-07	130.182	1.37091e-07
130.286	1.43485e-08	130.278	2.12085e-07	130.291	1.97697e-07	130.282	1.32819e-07
130.386	1.43485e-08	130.378	1.99573e-07	130.391	1.90373e-07	130.382	1.28546e-07
130.486	1.46842e-08	130.478	1.92554e-07	130.491	1.84879e-07	130.482	1.24884e-07
130.586	1.4379e-08	130.578	1.8523e-07	130.591	1.82438e-07	130.582	1.22138e-07
130.686	1.35856e-08	130.678	1.81568e-07	130.691	1.78166e-07	130.682	1.19696e-07
130.786	1.34635e-08	130.778	1.76074e-07	130.791	1.72367e-07	130.782	1.17255e-07
130.886	1.32499e-08	130.878	1.74243e-07	130.891	1.70231e-07	130.882	1.14814e-07
130.986	1.29447e-08	130.978	1.70886e-07	130.991	1.65959e-07	130.982	1.15424e-07
131.086	1.13273e-08	131.078	1.69361e-07	131.091	1.63822e-07	131.082	1.13898e-07
131.186	1.05033e-08	131.178	1.66614e-07	131.191	1.59245e-07	131.182	1.12372e-07
131.286	1.19987e-08	131.278	1.63257e-07	131.291	1.57108e-07	131.282	1.12067e-07
131.386	1.16019e-08	131.378	1.6051e-07	131.391	1.53446e-07	131.382	1.09626e-07
131.486	1.14799e-08	131.478	1.57764e-07	131.491	1.507e-07	131.482	1.07489e-07
131.586	1.09e-08	131.578	1.55933e-07	131.591	1.47953e-07	131.582	1.05658e-07
131.686	1.06864e-08	131.678	1.5166e-07	131.691	1.44901e-07	131.682	1.05353e-07
131.786	1.11442e-08	131.778	1.48303e-07	131.791	1.40934e-07	131.782	1.04438e-07
131.886	1.06559e-08	131.878	1.46167e-07	131.891	1.40324e-07	131.882	1.03827e-07
131.986	1.03812e-08	131.978	1.42505e-07	131.991	1.37882e-07	131.982	1.03217e-07
132.086	1.05949e-08	132.078	1.40674e-07	132.091	1.34831e-07	132.082	1.00776e-07
132.186	1.01371e-08	132.178	1.39148e-07	132.191	1.32694e-07	132.182	1.01081e-07
132.286	1.00761e-08	132.278	1.37622e-07	132.291	1.29948e-07	132.282	1.01691e-07
132.386	9.4352e-09	132.378	1.34265e-07	132.391	1.30558e-07	132.382	9.92496e-08
132.486	9.74038e-09	132.478	1.32129e-07	132.491	1.27812e-07	132.482	9.74186e-08
132.586	9.09951e-09	132.578	1.31214e-07	132.591	1.25065e-07	132.582	9.74186e-08
132.686	8.42812e-09	132.678	1.27551e-07	132.691	1.21708e-07	132.682	9.68082e-08
132.786	9.61831e-09	132.778	1.26636e-07	132.791	1.21708e-07	132.782	9.4672e-08
132.886	8.64174e-09	132.878	1.24805e-07	132.891	1.20487e-07	132.882	9.43668e-08
132.986	8.61122e-09	132.978	1.22364e-07	132.991	1.17436e-07	132.982	9.34513e-08
133.086	8.33657e-09	133.078	1.22058e-07	133.091	1.15604e-07	133.082	9.34513e-08
133.186	7.72622e-09	133.178	1.18091e-07	133.191	1.11637e-07	133.182	9.16202e-08
133.286	8.30605e-09	133.278	1.19007e-07	133.291	1.12553e-07	133.282	9.03995e-08
133.386	8.45864e-09	133.378	1.16565e-07	133.391	1.11637e-07	133.382	8.9484e-08
133.486	8.85537e-09	133.478	1.15955e-07	133.491	1.08585e-07	133.482	8.91788e-08
133.586	8.51967e-09	133.578	1.13208e-07	133.591	1.06449e-07	133.582	8.76529e-08
133.686	8.61122e-09	133.678	1.11988e-07	133.691	1.02787e-07	133.682	8.46012e-08
133.786	7.93984e-09	133.778	1.11682e-07	133.791	1.02482e-07	133.782	8.52115e-08
133.886	7.39052e-09	133.878	1.08325e-07	133.891	9.94302e-08	133.882	8.39908e-08
133.986	7.29897e-09	133.978	1.09241e-07	133.991	9.85147e-08	133.982	8.30753e-08
134.086	7.32949e-09	134.078	1.068e-07	134.091	9.60732e-08	134.082	8.27701e-08
134.186	6.87172e-09	134.178	1.0741e-07	134.191	9.45474e-08	134.182	8.06339e-08
134.286	6.84121e-09	134.278	1.04358e-07	134.291	9.36318e-08	134.282	8.03287e-08
134.386	6.32241e-09	134.378	1.04358e-07	134.391	9.27163e-08	134.382	7.88028e-08
134.486	5.4374e-09	134.478	1.01917e-07	134.491	9.05801e-08	134.482	7.81925e-08
134.586	5.86464e-09	134.578	1.02527e-07	134.591	8.81387e-08	134.582	7.81925e-08
134.686	4.3998e-09	134.678	1.01612e-07	134.691	8.56973e-08	134.682	7.7277e-08
134.786	4.12514e-09	134.778	9.97805e-08	134.791	8.44766e-08	134.782	7.7277e-08
134.886	5.49843e-09	134.878	1.00086e-07	134.891	8.47817e-08	134.882	7.88028e-08
134.986	4.67446e-09	134.978	9.70339e-08	134.991	8.20352e-08	134.982	7.51407e-08
135.086	4.21669e-09	135.078	9.82546e-08	135.091	8.11196e-08	135.082	7.63614e-08
135.186	5.07119e-09	135.178	9.70339e-08	135.191	8.14248e-08	135.182	7.60563e-08
135.286	5.52895e-09	135.278	9.39822e-08	135.291	7.98989e-08	135.282	7.48356e-08
135.386	5.22377e-09	135.378	9.39822e-08	135.391	7.80679e-08	135.382	7.36149e-08
135.486	5.28481e-09	135.478	9.15408e-08	135.491	7.59316e-08	135.482	7.2089e-08
135.586	4.85756e-09	135.578	9.24563e-08	135.591	7.68472e-08	135.582	7.23942e-08
135.686	4.79653e-09	135.678	9.03201e-08	135.691	7.56265e-08	135.682	7.14786e-08
135.786	3.85048e-09	135.778	8.90994e-08	135.791	7.47109e-08	135.782	7.17838e-08
135.886	3.20961e-09	135.878	8.72683e-08	135.891	7.37954e-08	135.882	7.2089e-08
135.986	3.48427e-09	135.978	8.66579e-08	135.991	7.25747e-08	135.982	7.2089e-08
136.086	4.03359e-09	136.078	8.60476e-08	136.091	7.16592e-08	136.082	7.14786e-08
136.186	5.46791e-09	136.178	8.39114e-08	136.191	7.16592e-08	136.182	7.23942e-08
136.286	4.82705e-09	136.278	8.29958e-08	136.291	7.07437e-08	136.282	7.11735e-08
136.386	4.24721e-09	136.378	8.11648e-08	136.391	7.07437e-08	136.382	6.90372e-08
136.486	3.81997e-09	136.478	7.96389e-08	136.491	7.07437e-08	136.482	6.41544e-08
136.586	3.27065e-09	136.578	7.96389e-08	136.591	6.9523e-08	136.582	6.53751e-08
136.686	4.00307e-09	136.678	8.02493e-08	136.691	6.79971e-08	136.682	6.32389e-08
136.786	3.60634e-09	136.778	7.90286e-08	136.791	6.64712e-08	136.782	6.32389e-08
136.886	3.20961e-09	136.878	7.78078e-08	136.891	6.6166e-08	136.882	6.26285e-08
136.986	3.08754e-09	136.978	7.6282e-08	136.991	6.64712e-08	136.982	6.26285e-08
137.086	2.90444e-09	137.078	7.41457e-08	137.091	6.46401e-08	137.082	6.20182e-08
137.186	3.24013e-09	137.178	7.35354e-08	137.191	6.37246e-08	137.182	6.26285e-08
137.286	2.6603e-09	137.278	7.07888e-08	137.291	6.52505e-08	137.282	6.07975e-08
137.386	3.54531e-09	137.378	7.01785e-08	137.391	6.40298e-08	137.382	6.01871e-08
137.486	3.75893e-09	137.478	6.98733e-08	137.491	6.31143e-08	137.482	5.83561e-08
137.586	3.39272e-09	137.578	6.74319e-08	137.591	6.0978e-08	137.582	5.71354e-08
137.686	2.87392e-09	137.678	6.71267e-08	137.691	6.15884e-08	137.682	5.62198e-08
137.786	3.24013e-09	137.778	6.7737e-08	137.791	6.0978e-08	137.782	5.68302e-08
137.886	3.94204e-09	137.878	6.65163e-08	137.891	6.12832e-08	137.882	5.56095e-08
137.986	4.21669e-09	137.978	6.62112e-08	137.991	5.9147e-08	137.982	5.6525e-08
138.086	2.56874e-09	138.078	6.52956e-08	138.091	6.00625e-08	138.082	5.40836e-08
138.186	2.53823e-09	138.178	6.40749e-08	138.191	5.79263e-08	138.182	5.22526e-08
138.286	2.90444e-09	138.278	6.28542e-08	138.291	6.00625e-08	138.282	4.98111e-08
138.386	1.40908e-09	138.378	6.22439e-08	138.391	5.85366e-08	138.382	4.76749e-08
138.486	2.20253e-09	138.478	6.25491e-08	138.491	5.60952e-08	138.482	4.70646e-08
138.586	1.77529e-09	138.578	6.10232e-08	138.591	5.70107e-08	138.582	4.76749e-08
138.686	2.44667e-09	138.678	6.13284e-08	138.691	5.60952e-08	138.682	4.70646e-08
138.786	1.86684e-09	138.778	5.98025e-08	138.791	5.45693e-08	138.782	4.73697e-08
138.886	1.86684e-09	138.878	5.85818e-08	138.891	5.45693e-08	138.882	4.55387e-08
138.986	1.71425e-09	138.978	5.70559e-08	138.991	5.30435e-08	138.982	4.49283e-08
139.086	1.95839e-09	139.078	5.61404e-08	139.091	5.36538e-08	139.082	4.52335e-08
139.186	1.74477e-09	139.178	5.46145e-08	139.191	5.54849e-08	139.182	4.6149e-08
139.286	1.19545e-09	139.278	5.58352e-08	139.291	5.45693e-08	139.282	4.73697e-08
139.386	1.28701e-09	139.378	5.52248e-08	139.391	5.21279e-08	139.382	4.64542e-08
139.486	1.1039e-09	139.478	5.52248e-08	139.491	5.36538e-08	139.482	4.67594e-08
139.586	6.76655e-10	139.578	5.43093e-08	139.591	5.36538e-08	139.582	4.73697e-08
139.686	1.57856e-10	139.678	5.43093e-08	139.691	5.24331e-08	139.682	4.6149e-08
139.786	9.51313e-10	139.778	5.33938e-08	139.791	5.06021e-08	139.782	4.67594e-08
139.886	1.59218e-09	139.878	5.27834e-08	139.891	5.12124e-08	139.882	4.55387e-08
139.986	7.68207e-10	139.978	5.27834e-08	139.991	4.90762e-08	139.982	4.34025e-08
140.086	6.15619e-10	140.078	5.30886e-08	140.091	4.8771e-08	140.082	4.34025e-08
140.186	4.93549e-10	140.178	5.46145e-08	140.191	9.54629e-08	140.182	4.18766e-08
140.286	3.71479e-10	140.278	5.30886e-08	140.291	1.2476e-07	140.282	4.92008e-08
140.386	9.8183e-10	140.378	9.79494e-08	140.391	1.36662e-07	140.382	6.75113e-08
140.486	1.65322e-09	140.478	1.31214e-07	140.491	1.44596e-07	140.482	7.51407e-08
140.586	2.23305e-09	140.578	1.44947e-07	140.591	1.49784e-07	140.582	7.75821e-08
140.686	1.71425e-09	140.678	1.53491e-07	140.691	1.55888e-07	140.682	8.06339e-08
140.786	1.71425e-09	140.778	1.599e-07	140.791	1.6016e-07	140.782	8.36857e-08
140.886	2.81289e-09	140.878	1.63257e-07	140.891	1.63517e-07	140.882	8.64322e-08
140.986	3.05703e-09	140.978	1.63867e-07	140.991	1.66874e-07	140.982	9.19254e-08
141.086	3.30117e-09	141.078	1.6753e-07	141.091	1.68705e-07	141.082	9.07047e-08
141.186	3.3622e-09	141.178	1.6753e-07	141.191	1.73283e-07	141.182	9.19254e-08
141.286	3.60634e-09	141.278	1.73633e-07	141.291	1.76334e-07	141.282	9.25358e-08
141.386	3.75893e-09	141.378	1.78516e-07	141.391	1.80302e-07	141.382	9.31461e-08
141.486	4.67446e-09	141.478	1.85535e-07	141.491	1.82438e-07	141.482	9.40616e-08
141.586	4.36928e-09	141.578	1.89807e-07	141.591	1.8549e-07	141.582	9.52823e-08
141.686	3.48427e-09	141.678	1.92859e-07	141.691	1.89457e-07	141.682	9.86393e-08
141.786	4.5829e-09	141.778	1.97437e-07	141.791	1.90678e-07	141.782	9.95548e-08
141.886	4.70497e-09	141.878	2.0232e-07	141.891	1.92814e-07	141.882	9.986e-08
141.986	4.00307e-09	141.978	2.02625e-07	141.991	1.9495e-07	141.982	9.986e-08
142.086	3.54531e-09	142.078	2.05371e-07	142.091	1.95866e-07	142.082	1.0047e-07
142.186	4.12514e-09	142.178	2.05066e-07	142.191	1.99833e-07	142.182	1.01691e-07
142.286	3.30117e-09	142.278	2.08118e-07	142.291	2.0319e-07	142.282	1.01386e-07
142.386	4.97963e-09	142.378	2.05676e-07	142.391	2.04105e-07	142.382	1.02607e-07
142.486	5.40688e-09	142.478	2.06897e-07	142.491	2.038e-07	142.482	1.02912e-07
142.586	5.6205e-09	142.578	2.06592e-07	142.591	2.08683e-07	142.582	1.04438e-07
142.686	5.80361e-09	142.678	2.07813e-07	142.691	2.10209e-07	142.682	1.05353e-07
142.786	4.67446e-09	142.778	2.08423e-07	142.791	2.1265e-07	142.782	1.05963e-07
142.886	4.97963e-09	142.878	2.1117e-07	142.891	2.13261e-07	142.882	1.07795e-07
142.986	4.46083e-09	142.978	2.13001e-07	142.991	2.14481e-07	142.982	1.0871e-07
143.086	4.82705e-09	143.078	2.14832e-07	143.091	2.19975e-07	143.082	1.09626e-07
143.186	5.4374e-09	143.178	2.1178e-07	143.191	2.19669e-07	143.182	1.11762e-07
143.286	6.6581e-09	143.278	2.10254e-07	143.291	2.21195e-07	143.282	1.12372e-07
143.386	6.99379e-09	143.378	2.12696e-07	143.391	2.22721e-07	143.382	1.12983e-07
143.486	7.08535e-09	143.478	2.13001e-07	143.491	2.24247e-07	143.482	1.12983e-07
143.586	6.93276e-09	143.578	2.16358e-07	143.591	2.27299e-07	143.582	1.15729e-07
143.686	6.84121e-09	143.678	2.16052e-07	143.691	2.2974e-07	143.682	1.12677e-07
143.786	6.87172e-09	143.778	2.16968e-07	143.791	2.30045e-07	143.782	1.14203e-07
143.886	6.07827e-09	143.878	2.18799e-07	143.891	2.31266e-07	143.882	1.1695e-07
143.986	6.68862e-09	143.978	2.19104e-07	143.991	2.34318e-07	143.982	1.1695e-07
144.086	6.20034e-09	144.078	2.18494e-07	144.091	2.34318e-07	144.082	1.1756e-07
144.186	7.23793e-09	144.178	2.20935e-07	144.191	2.38285e-07	144.182	1.1695e-07
144.286	6.99379e-09	144.278	2.22461e-07	144.291	2.38896e-07	144.282	1.17255e-07
144.386	7.26845e-09	144.378	2.23072e-07	144.391	2.41337e-07	144.382	1.18476e-07
144.486	7.72622e-09	144.478	2.26428e-07	144.491	2.40727e-07	144.482	1.17255e-07
144.586	7.90932e-09	144.578	2.27039e-07	144.591	2.41642e-07	144.582	1.17865e-07
144.686	7.93984e-09	144.678	2.29175e-07	144.691	2.42558e-07	144.682	1.19696e-07
144.786	7.75673e-09	144.778	2.30701e-07	144.791	2.42558e-07	144.782	1.22138e-07
144.886	8.55019e-09	144.878	2.32227e-07	144.891	2.42863e-07	144.882	1.21527e-07
144.986	8.85537e-09	144.978	2.30701e-07	144.991	2.43473e-07	144.982	1.22138e-07
145.086	8.51967e-09	145.078	2.33447e-07	145.091	2.43473e-07	145.082	1.24274e-07
145.186	7.72622e-09	145.178	2.34363e-07	145.191	2.44694e-07	145.182	1.23969e-07
145.286	8.94692e-09	145.278	2.34973e-07	145.291	2.45304e-07	145.282	1.22443e-07
145.386	9.34365e-09	145.378	2.36804e-07	145.391	2.44084e-07	145.382	1.24579e-07
145.486	9.89296e-09	145.478	2.38941e-07	145.491	2.44389e-07	145.482	1.258e-07
145.586	9.74038e-09	145.578	2.38635e-07	145.591	2.44999e-07	145.582	1.258e-07
145.686	9.74038e-09	145.678	2.40467e-07	145.691	2.44389e-07	145.682	1.27326e-07
145.786	8.06191e-09	145.778	2.41077e-07	145.791	2.42252e-07	145.782	1.28546e-07
145.886	8.79433e-09	145.878	2.40161e-07	145.891	2.40727e-07	145.882	1.30988e-07
145.986	8.67226e-09	145.978	2.40772e-07	145.991	2.42558e-07	145.982	1.3404e-07
146.086	9.86245e-09	146.078	2.41077e-07	146.091	2.4622e-07	146.082	1.37091e-07
146.186	9.98452e-09	146.178	2.43518e-07	146.191	2.45609e-07	146.182	1.39533e-07
146.286	9.49623e-09	146.278	2.42908e-07	146.291	2.41032e-07	146.282	1.37397e-07
146.386	1.0778e-08	146.378	2.44434e-07	146.391	2.38285e-07	146.382	1.38007e-07
146.486	1.03812e-08	146.478	2.44739e-07	146.491	2.39506e-07	146.482	1.35566e-07
146.586	1.01066e-08	146.578	2.45044e-07	146.591	2.41337e-07	146.582	1.35566e-07
146.686	1.07169e-08	146.678	2.44739e-07	146.691	2.44084e-07	146.682	1.39838e-07
146.786	1.14494e-08	146.778	2.45655e-07	146.791	2.44694e-07	146.782	1.41059e-07
146.886	1.1724e-08	146.878	2.4596e-07	146.891	2.48661e-07	146.882	1.41364e-07
146.986	1.03507e-08	146.978	2.4596e-07	146.991	2.49577e-07	146.982	1.41974e-07
147.086	1.09611e-08	147.078	2.46265e-07	147.091	2.51103e-07	147.082	1.4411e-07
147.186	1.13578e-08	147.178	2.46875e-07	147.191	2.52323e-07	147.182	1.41364e-07
147.286	1.18766e-08	147.278	2.45044e-07	147.291	2.51713e-07	147.282	1.39838e-07
147.386	1.0778e-08	147.378	2.4657e-07	147.391	2.51103e-07	147.382	1.40448e-07
147.486	1.18461e-08	147.478	2.46265e-07	147.491	2.51713e-07	147.482	1.41364e-07
147.586	1.19376e-08	147.578	2.47486e-07	147.591	2.53239e-07	147.582	1.42279e-07
147.686	1.12663e-08	147.678	2.48401e-07	147.691	2.54459e-07	147.682	1.41669e-07
147.786	1.0778e-08	147.778	2.50843e-07	147.791	2.5507e-07	147.782	1.42585e-07
147.886	1.03507e-08	147.878	2.50232e-07	147.891	2.54765e-07	147.882	1.435e-07
147.986	1.15714e-08	147.978	2.52368e-07	147.991	2.53849e-07	147.982	1.45636e-07
148.086	1.11137e-08	148.078	2.52674e-07	148.091	2.56291e-07	148.082	1.45331e-07
148.186	1.05033e-08	148.178	2.53894e-07	148.191	2.55375e-07	148.182	1.45636e-07
148.286	1.03202e-08	148.278	2.51453e-07	148.291	2.55985e-07	148.282	1.46552e-07
148.386	1.12052e-08	148.378	2.54199e-07	148.391	2.58427e-07	148.382	1.48688e-07
148.486	1.28837e-08	148.478	2.54505e-07	148.491	2.58122e-07	148.482	1.47467e-07
148.586	1.28227e-08	148.578	2.52979e-07	148.591	2.60258e-07	148.582	1.47773e-07
148.686	1.24564e-08	148.678	2.52674e-07	148.691	2.59647e-07	148.682	1.48383e-07
148.786	1.32194e-08	148.778	2.52674e-07	148.791	2.60868e-07	148.782	1.48993e-07
148.886	1.36771e-08	148.878	2.52674e-07	148.891	2.62394e-07	148.882	1.48993e-07
148.986	1.3433e-08	148.978	2.51758e-07	148.991	2.61784e-07	148.982	1.48078e-07
149.086	1.38602e-08	149.078	2.54505e-07	149.091	2.62394e-07	149.082	1.48688e-07
149.186	1.37687e-08	149.178	2.56336e-07	149.191	2.63615e-07	149.182	1.5174e-07
149.286	1.39823e-08	149.278	2.5542e-07	149.291	2.62699e-07	149.282	1.52045e-07
149.386	1.44706e-08	149.378	2.55725e-07	149.391	2.61173e-07	149.382	1.52655e-07
149.486	1.42265e-08	149.478	2.57556e-07	149.491	2.62699e-07	149.482	1.52045e-07
149.586	1.37687e-08	149.578	2.56946e-07	149.591	2.60563e-07	149.582	1.52655e-07
149.686	1.39213e-08	149.678	2.57556e-07	149.691	2.62699e-07	149.682	1.5235e-07
149.786	1.29752e-08	149.778	2.58472e-07	149.791	2.59342e-07	149.782	1.50214e-07
149.886	1.26395e-08	149.878	2.58472e-07	149.891	2.08073e-07	149.882	1.33734e-07
149.986	1.35246e-08	149.978	2.58167e-07	149.991	1.95561e-07	149.982	1.29157e-07
150.086	1.41044e-08	150.078	2.58472e-07	150.091	1.87626e-07	150.082	1.258e-07
150.186	1.44401e-08	150.178	2.58777e-07	150.191	1.83964e-07	150.182	1.23359e-07
150.286	1.41044e-08	150.278	2.60303e-07	150.291	1.80302e-07	150.282	1.20917e-07
150.386	1.35551e-08	150.378	2.61829e-07	150.391	1.77555e-07	150.382	1.15119e-07
150.486	1.3494e-08	150.478	2.33447e-07	150.491	1.75419e-07	150.482	1.10236e-07
150.586	1.37992e-08	150.578	2.0293e-07	150.591	1.68705e-07	150.582	1.06879e-07
150.686	1.29752e-08	150.678	1.95606e-07	150.691	1.64127e-07	150.682	1.05963e-07
150.786	1.19071e-08	150.778	1.91028e-07	150.791	1.6016e-07	150.782	1.06574e-07
150.886	1.33414e-08	150.878	1.86756e-07	150.891	1.59245e-07	150.882	1.04438e-07
150.986	1.27921e-08	150.978	1.80957e-07	150.991	1.54362e-07	150.982	1.0047e-07
151.086	1.31278e-08	151.078	1.74549e-07	151.091	1.5131e-07	151.082	9.61979e-08
151.186	1.28227e-08	151.178	1.69666e-07	151.191	1.50395e-07	151.182	9.28409e-08
151.286	1.30363e-08	151.278	1.66614e-07	151.291	1.46732e-07	151.282	8.91788e-08
151.386	1.14494e-08	151.378	1.62952e-07	151.391	1.46427e-07	151.382	8.76529e-08
151.486	1.21207e-08	151.478	1.58679e-07	151.491	1.40934e-07	151.482	8.52115e-08
151.586	1.20902e-08	151.578	1.57154e-07	151.591	1.39713e-07	151.582	8.30753e-08
151.686	1.21818e-08	151.678	1.56543e-07	151.691	1.37882e-07	151.682	8.15494e-08
151.786	1.14799e-08	151.778	1.51355e-07	151.791	1.3422e-07	151.782	8.15494e-08
151.886	1.04728e-08	151.878	1.47083e-07	151.891	1.33305e-07	151.882	8.12443e-08
151.986	1.07169e-08	151.978	1.43421e-07	151.991	1.30253e-07	151.982	8.09391e-08
152.086	1.05033e-08	152.078	1.39759e-07	152.091	1.29337e-07	152.082	8.21598e-08
152.186	1.10831e-08	152.178	1.37622e-07	152.191	1.27812e-07	152.182	8.06339e-08
152.286	9.74038e-09	152.278	1.35486e-07	152.291	1.24455e-07	152.282	8.09391e-08
152.386	1.02897e-08	152.378	1.35181e-07	152.391	1.23539e-07	152.382	8.03287e-08
152.486	9.22158e-09	152.478	1.33655e-07	152.491	1.22013e-07	152.482	8.03287e-08
152.586	9.22158e-09	152.578	1.30908e-07	152.591	1.21403e-07	152.582	7.97184e-08
152.686	8.55019e-09	152.678	1.29077e-07	152.691	1.18961e-07	152.682	7.81925e-08
152.786	9.67934e-09	152.778	1.24805e-07	152.791	1.17741e-07	152.782	7.94132e-08
152.886	8.03139e-09	152.878	1.23584e-07	152.891	1.14689e-07	152.882	7.84977e-08
152.986	9.09951e-09	152.978	1.21753e-07	152.991	1.15604e-07	152.982	7.81925e-08
153.086	8.64174e-09	153.078	1.19922e-07	153.091	1.14994e-07	153.082	7.75821e-08
153.186	8.24501e-09	153.178	1.19922e-07	153.191	1.12553e-07	153.182	7.69718e-08
153.286	7.78725e-09	153.278	1.15955e-07	153.291	1.0828e-07	153.282	7.66666e-08
153.386	6.96328e-09	153.378	1.15039e-07	153.391	1.0828e-07	153.382	7.60563e-08
153.486	7.75673e-09	153.478	1.14124e-07	153.491	1.07365e-07	153.482	7.42252e-08
153.586	7.75673e-09	153.578	1.13513e-07	153.591	1.05534e-07	153.582	7.08683e-08
153.686	7.32949e-09	153.678	1.10767e-07	153.691	1.02787e-07	153.682	6.6901e-08
153.786	7.32949e-09	153.778	1.10156e-07	153.791	1.01261e-07	153.782	6.35441e-08
153.886	7.51259e-09	153.878	1.09241e-07	153.891	9.88198e-08	153.882	6.29337e-08
153.986	7.14638e-09	153.978	1.08631e-07	153.991	9.7294e-08	153.982	6.07975e-08
154.086	6.96328e-09	154.078	1.09851e-07	154.091	9.63784e-08	154.082	6.07975e-08
154.186	6.99379e-09	154.178	1.08936e-07	154.191	9.42422e-08	154.182	6.11026e-08
154.286	6.78017e-09	154.278	1.07105e-07	154.291	9.30215e-08	154.282	5.98819e-08
154.386	6.99379e-09	154.378	1.07715e-07	154.391	9.27163e-08	154.382	5.80509e-08
154.486	6.81069e-09	154.478	1.07715e-07	154.491	9.14956e-08	154.482	5.59147e-08
154.586	6.6581e-09	154.578	1.07105e-07	154.591	8.90542e-08	154.582	5.49991e-08
154.686	6.78017e-09	154.678	1.0802e-07	154.691	8.72232e-08	154.682	5.49991e-08
154.786	6.71914e-09	154.778	1.07105e-07	154.791	8.56973e-08	154.782	5.49991e-08
154.886	5.98671e-09	154.878	1.06494e-07	154.891	8.3561e-08	154.882	5.37784e-08
154.986	5.07119e-09	154.978	1.04968e-07	154.991	8.32559e-08	154.982	5.43888e-08
155.086	4.88808e-09	155.078	1.06189e-07	155.091	8.02041e-08	155.082	5.43888e-08
155.186	6.41396e-09	155.178	1.04358e-07	155.191	8.05093e-08	155.182	5.19474e-08
155.286	5.77309e-09	155.278	1.01306e-07	155.291	7.92886e-08	155.282	5.25577e-08
155.386	5.04067e-09	155.378	1.01612e-07	155.391	7.77627e-08	155.382	5.04215e-08
155.486	4.88808e-09	155.478	1.00391e-07	155.491	7.59316e-08	155.482	4.92008e-08
155.586	4.46083e-09	155.578	9.79494e-08	155.591	7.62368e-08	155.582	4.9506e-08
155.686	4.03359e-09	155.678	9.73391e-08	155.691	7.50161e-08	155.682	4.9506e-08
155.786	4.82705e-09	155.778	9.5508e-08	155.791	7.37954e-08	155.782	4.85904e-08
[truncated: 500 more rows]
