# Supplementary material for: In-depth chiral sensing capability of C-dots in a biomimetic protein-based hydrogel: a probe for chiral recognition applications
Source: Royal Society of Chemistry journal article supplement (doi:10.1039/d5bm01508a), 2026-01-01
Supplement: d5bm01508a1.zip [file Figure 4.xlsx]

## Sheet: Figure4 (a)
-1.4975	-9.99969e-06	-1.4975	-9.99969e-06	-1.4975	-9.99969e-06
-1.49506	-3.12592e-05	-1.49506	-3.66791e-05	-1.49506	-6.20178e-05
-1.49261	-2.70599e-05	-1.49261	-3.28522e-05	-1.49261	-5.58167e-05
-1.49017	-2.42615e-05	-1.49017	-3.02673e-05	-1.49017	-5.14221e-05
-1.48773	-2.2226e-05	-1.48773	-2.83356e-05	-1.48773	-4.81415e-05
-1.48529	-2.06696e-05	-1.48529	-2.68219e-05	-1.48529	-4.55048e-05
-1.48285	-1.94214e-05	-1.48285	-2.55798e-05	-1.48285	-4.33197e-05
-1.48041	-1.84052e-05	-1.48041	-2.4527e-05	-1.48041	-4.14764e-05
-1.47797	-1.75446e-05	-1.47797	-2.36176e-05	-1.47797	-3.98804e-05
-1.47552	-1.67938e-05	-1.47552	-2.2818e-05	-1.47552	-3.82874e-05
-1.47308	-1.61377e-05	-1.47308	-2.21008e-05	-1.47308	-3.7027e-05
-1.47064	-1.55579e-05	-1.47064	-2.14539e-05	-1.47064	-3.59039e-05
-1.4682	-1.5033e-05	-1.4682	-2.08679e-05	-1.4682	-3.48663e-05
-1.46576	-1.4566e-05	-1.46576	-2.03308e-05	-1.46576	-3.39264e-05
-1.46332	-1.41266e-05	-1.46332	-1.98303e-05	-1.46332	-3.30475e-05
-1.46088	-1.37268e-05	-1.46088	-1.93726e-05	-1.46088	-3.22388e-05
-1.45844	-1.33514e-05	-1.45844	-1.89423e-05	-1.45844	-3.14819e-05
-1.45599	-1.30035e-05	-1.45599	-1.85333e-05	-1.45599	-3.07709e-05
-1.45355	-1.26801e-05	-1.45355	-1.81458e-05	-1.45355	-3.00995e-05
-1.45111	-1.2381e-05	-1.45111	-1.77917e-05	-1.45111	-2.94678e-05
-1.44867	-1.2088e-05	-1.44867	-1.74469e-05	-1.44867	-2.88605e-05
-1.44623	-1.18225e-05	-1.44623	-1.71204e-05	-1.44623	-2.8299e-05
-1.44379	-1.15601e-05	-1.44379	-1.68121e-05	-1.44379	-2.77496e-05
-1.44135	-1.1319e-05	-1.44135	-1.651e-05	-1.44135	-2.72369e-05
-1.4389	-1.1084e-05	-1.4389	-1.62262e-05	-1.4389	-2.67395e-05
-1.43646	-1.08551e-05	-1.43646	-1.59546e-05	-1.43646	-2.62665e-05
-1.43402	-1.06323e-05	-1.43402	-1.5686e-05	-1.43402	-2.58057e-05
-1.43158	-1.04248e-05	-1.43158	-1.54358e-05	-1.43158	-2.53723e-05
-1.42914	-1.02203e-05	-1.42914	-1.51917e-05	-1.42914	-2.4942e-05
-1.4267	-1.00372e-05	-1.4267	-1.49536e-05	-1.4267	-2.45392e-05
-1.42426	-9.86023e-06	-1.42426	-1.47247e-05	-1.42426	-2.41425e-05
-1.42181	-9.69543e-06	-1.42181	-1.45081e-05	-1.42181	-2.3764e-05
-1.41937	-9.52454e-06	-1.41937	-1.42944e-05	-1.41937	-2.33948e-05
-1.41693	-9.35974e-06	-1.41693	-1.40869e-05	-1.41693	-2.30377e-05
-1.41449	-9.198e-06	-1.41449	-1.38824e-05	-1.41449	-2.26837e-05
-1.41205	-9.03931e-06	-1.41205	-1.36902e-05	-1.41205	-2.23541e-05
-1.40961	-8.88977e-06	-1.40961	-1.34949e-05	-1.40961	-2.20215e-05
-1.40717	-8.75854e-06	-1.40717	-1.33087e-05	-1.40717	-2.17041e-05
-1.40472	-8.63342e-06	-1.40472	-1.31256e-05	-1.40472	-2.13959e-05
-1.40228	-8.51135e-06	-1.40228	-1.29456e-05	-1.40228	-2.10938e-05
-1.39984	-8.38318e-06	-1.39984	-1.27716e-05	-1.39984	-2.08008e-05
-1.3974	-8.26416e-06	-1.3974	-1.26007e-05	-1.3974	-2.05109e-05
-1.39496	-8.13904e-06	-1.39496	-1.24298e-05	-1.39496	-2.02271e-05
-1.39252	-8.02002e-06	-1.39252	-1.22681e-05	-1.39252	-1.99554e-05
-1.39008	-7.901e-06	-1.39008	-1.21063e-05	-1.39008	-1.96808e-05
-1.38763	-7.78503e-06	-1.38763	-1.19507e-05	-1.38763	-1.94244e-05
-1.38519	-7.67822e-06	-1.38519	-1.17981e-05	-1.38519	-1.91681e-05
-1.38275	-7.57446e-06	-1.38275	-1.16486e-05	-1.38275	-1.89178e-05
-1.38031	-7.4707e-06	-1.38031	-1.15051e-05	-1.38031	-1.86737e-05
-1.37787	-7.37305e-06	-1.37787	-1.13586e-05	-1.37787	-1.84326e-05
-1.37543	-7.27539e-06	-1.37543	-1.12152e-05	-1.37543	-1.81946e-05
-1.37299	-7.17773e-06	-1.37299	-1.10809e-05	-1.37299	-1.79657e-05
-1.37054	-7.08008e-06	-1.37054	-1.09406e-05	-1.37054	-1.77368e-05
-1.3681	-6.98242e-06	-1.3681	-1.08124e-05	-1.3681	-1.75171e-05
-1.36566	-6.88782e-06	-1.36566	-1.06781e-05	-1.36566	-1.72943e-05
-1.36322	-6.80542e-06	-1.36322	-1.0553e-05	-1.36322	-1.70837e-05
-1.36078	-6.72607e-06	-1.36078	-1.04279e-05	-1.36078	-1.68732e-05
-1.35834	-6.63757e-06	-1.35834	-1.03088e-05	-1.35834	-1.66656e-05
-1.3559	-6.55212e-06	-1.3559	-1.01868e-05	-1.3559	-1.64581e-05
-1.35345	-6.47278e-06	-1.35345	-1.00739e-05	-1.35345	-1.62628e-05
-1.35101	-6.39648e-06	-1.35101	-9.95789e-06	-1.35101	-1.60614e-05
-1.34857	-6.32324e-06	-1.34857	-9.84802e-06	-1.34857	-1.58722e-05
-1.34613	-6.24695e-06	-1.34613	-9.729e-06	-1.34613	-1.56769e-05
-1.34369	-6.17371e-06	-1.34369	-9.62524e-06	-1.34369	-1.54907e-05
-1.34125	-6.10352e-06	-1.34125	-9.51233e-06	-1.34125	-1.53076e-05
-1.33881	-6.03027e-06	-1.33881	-9.40247e-06	-1.33881	-1.51245e-05
-1.33636	-5.96008e-06	-1.33636	-9.2926e-06	-1.33636	-1.49445e-05
-1.33392	-5.896e-06	-1.33392	-9.18579e-06	-1.33392	-1.47736e-05
-1.33148	-5.82886e-06	-1.33148	-9.08203e-06	-1.33148	-1.45996e-05
-1.32904	-5.76477e-06	-1.32904	-8.98132e-06	-1.32904	-1.44318e-05
-1.3266	-5.70068e-06	-1.3266	-8.87756e-06	-1.3266	-1.42609e-05
-1.32416	-5.6366e-06	-1.32416	-8.77686e-06	-1.32416	-1.4093e-05
-1.32172	-5.57861e-06	-1.32172	-8.6792e-06	-1.32172	-1.39282e-05
-1.31927	-5.52673e-06	-1.31927	-8.58154e-06	-1.31927	-1.37665e-05
-1.31683	-5.4718e-06	-1.31683	-8.48389e-06	-1.31683	-1.36047e-05
-1.31439	-5.41382e-06	-1.31439	-8.38623e-06	-1.31439	-1.3446e-05
-1.31195	-5.34973e-06	-1.31195	-8.29163e-06	-1.31195	-1.32904e-05
-1.30951	-5.2948e-06	-1.30951	-8.20007e-06	-1.30951	-1.31439e-05
-1.30707	-5.24292e-06	-1.30707	-8.10547e-06	-1.30707	-1.29913e-05
-1.30463	-5.19409e-06	-1.30463	-8.01697e-06	-1.30463	-1.28448e-05
-1.30219	-5.14221e-06	-1.30219	-7.92542e-06	-1.30219	-1.26953e-05
-1.29974	-5.09033e-06	-1.29974	-7.83691e-06	-1.29974	-1.25549e-05
-1.2973	-5.0354e-06	-1.2973	-7.74841e-06	-1.2973	-1.24084e-05
-1.29486	-4.98352e-06	-1.29486	-7.66602e-06	-1.29486	-1.22681e-05
-1.29242	-4.93774e-06	-1.29242	-7.57751e-06	-1.29242	-1.21277e-05
-1.28998	-4.90112e-06	-1.28998	-7.49512e-06	-1.28998	-1.19904e-05
-1.28754	-4.8584e-06	-1.28754	-7.41272e-06	-1.28754	-1.18561e-05
-1.2851	-4.81567e-06	-1.2851	-7.33032e-06	-1.2851	-1.17249e-05
-1.28265	-4.77051e-06	-1.28265	-7.25098e-06	-1.28265	-1.15936e-05
-1.28021	-4.72748e-06	-1.28021	-7.16858e-06	-1.28021	-1.14624e-05
-1.27777	-4.68201e-06	-1.27777	-7.08923e-06	-1.27777	-1.13312e-05
-1.27533	-4.63806e-06	-1.27533	-7.00989e-06	-1.27533	-1.12061e-05
-1.27289	-4.59167e-06	-1.27289	-6.93054e-06	-1.27289	-1.10748e-05
-1.27045	-4.55048e-06	-1.27045	-6.8573e-06	-1.27045	-1.09528e-05
-1.26801	-4.50623e-06	-1.26801	-6.77795e-06	-1.26801	-1.08276e-05
-1.26556	-4.46472e-06	-1.26556	-6.70471e-06	-1.26556	-1.07086e-05
-1.26312	-4.42352e-06	-1.26312	-6.63147e-06	-1.26312	-1.05865e-05
-1.26068	-4.38232e-06	-1.26068	-6.55518e-06	-1.26068	-1.04675e-05
-1.25824	-4.34448e-06	-1.25824	-6.47888e-06	-1.25824	-1.03455e-05
-1.2558	-4.30878e-06	-1.2558	-6.40564e-06	-1.2558	-1.02325e-05
-1.25336	-4.27063e-06	-1.25336	-6.3324e-06	-1.25336	-1.01135e-05
-1.25092	-4.2334e-06	-1.25092	-6.26221e-06	-1.25092	-1.00006e-05
-1.24847	-4.19861e-06	-1.24847	-6.19202e-06	-1.24847	-9.8877e-06
-1.24603	-4.16199e-06	-1.24603	-6.12183e-06	-1.24603	-9.77783e-06
-1.24359	-4.12811e-06	-1.24359	-6.05164e-06	-1.24359	-9.66797e-06
-1.24115	-4.09149e-06	-1.24115	-5.9845e-06	-1.24115	-9.55505e-06
-1.23871	-4.05609e-06	-1.23871	-5.91431e-06	-1.23871	-9.44519e-06
-1.23627	-4.02191e-06	-1.23627	-5.85022e-06	-1.23627	-9.33838e-06
-1.23383	-3.98682e-06	-1.23383	-5.78308e-06	-1.23383	-9.22852e-06
-1.23138	-3.95538e-06	-1.23138	-5.71899e-06	-1.23138	-9.12476e-06
-1.22894	-3.92242e-06	-1.22894	-5.65491e-06	-1.22894	-9.01794e-06
-1.2265	-3.88702e-06	-1.2265	-5.58777e-06	-1.2265	-8.91113e-06
-1.22406	-3.85254e-06	-1.22406	-5.52979e-06	-1.22406	-8.81042e-06
-1.22162	-3.81866e-06	-1.22162	-5.4657e-06	-1.22162	-8.70667e-06
-1.21918	-3.78601e-06	-1.21918	-5.40161e-06	-1.21918	-8.60291e-06
-1.21674	-3.75305e-06	-1.21674	-5.34363e-06	-1.21674	-8.50525e-06
-1.21429	-3.72375e-06	-1.21429	-5.27954e-06	-1.21429	-8.40149e-06
-1.21185	-3.69812e-06	-1.21185	-5.22461e-06	-1.21185	-8.30383e-06
-1.20941	-3.67126e-06	-1.20941	-5.16357e-06	-1.20941	-8.20313e-06
-1.20697	-3.64502e-06	-1.20697	-5.10254e-06	-1.20697	-8.10547e-06
-1.20453	-3.61633e-06	-1.20453	-5.0415e-06	-1.20453	-8.00781e-06
-1.20209	-3.591e-06	-1.20209	-4.98657e-06	-1.20209	-7.9071e-06
-1.19965	-3.56567e-06	-1.19965	-4.92554e-06	-1.19965	-7.80945e-06
-1.1972	-3.54095e-06	-1.1972	-4.86755e-06	-1.1972	-7.7179e-06
-1.19476	-3.51257e-06	-1.19476	-4.81262e-06	-1.19476	-7.61719e-06
-1.19232	-3.48816e-06	-1.19232	-4.76013e-06	-1.19232	-7.52258e-06
-1.18988	-3.46069e-06	-1.18988	-4.69879e-06	-1.18988	-7.42493e-06
-1.18744	-3.43597e-06	-1.18744	-4.64233e-06	-1.18744	-7.33337e-06
-1.185	-3.41187e-06	-1.185	-4.5874e-06	-1.185	-7.23877e-06
-1.18256	-3.38593e-06	-1.18256	-4.53094e-06	-1.18256	-7.14417e-06
-1.18011	-3.36395e-06	-1.18011	-4.47601e-06	-1.18011	-7.05261e-06
-1.17767	-3.34045e-06	-1.17767	-4.4223e-06	-1.17767	-6.96411e-06
-1.17523	-3.31696e-06	-1.17523	-4.3689e-06	-1.17523	-6.86951e-06
-1.17279	-3.29468e-06	-1.17279	-4.3161e-06	-1.17279	-6.78101e-06
-1.17035	-3.27576e-06	-1.17035	-4.26086e-06	-1.17035	-6.68945e-06
-1.16791	-3.25317e-06	-1.16791	-4.20929e-06	-1.16791	-6.60095e-06
-1.16547	-3.23181e-06	-1.16547	-4.15619e-06	-1.16547	-6.51245e-06
-1.16302	-3.21136e-06	-1.16302	-4.10553e-06	-1.16302	-6.42395e-06
-1.16058	-3.18939e-06	-1.16058	-4.05151e-06	-1.16058	-6.3385e-06
-1.15814	-3.16711e-06	-1.15814	-4.00391e-06	-1.15814	-6.25305e-06
-1.1557	-3.14789e-06	-1.1557	-3.95142e-06	-1.1557	-6.16455e-06
-1.15326	-3.12439e-06	-1.15326	-3.90076e-06	-1.15326	-6.08215e-06
-1.15082	-3.10303e-06	-1.15082	-3.84949e-06	-1.15082	-5.99365e-06
-1.14838	-3.0835e-06	-1.14838	-3.80005e-06	-1.14838	-5.91125e-06
-1.14594	-3.06305e-06	-1.14594	-3.75031e-06	-1.14594	-5.82886e-06
-1.14349	-3.04657e-06	-1.14349	-3.70056e-06	-1.14349	-5.74341e-06
-1.14105	-3.02368e-06	-1.14105	-3.65204e-06	-1.14105	-5.65796e-06
-1.13861	-3.00476e-06	-1.13861	-3.60504e-06	-1.13861	-5.57861e-06
-1.13617	-2.98492e-06	-1.13617	-3.55652e-06	-1.13617	-5.49622e-06
-1.13373	-2.96478e-06	-1.13373	-3.51135e-06	-1.13373	-5.41687e-06
-1.13129	-2.94586e-06	-1.13129	-3.46405e-06	-1.13129	-5.33447e-06
-1.12885	-2.92694e-06	-1.12885	-3.41888e-06	-1.12885	-5.25818e-06
-1.1264	-2.90924e-06	-1.1264	-3.37128e-06	-1.1264	-5.17578e-06
-1.12396	-2.89032e-06	-1.12396	-3.32581e-06	-1.12396	-5.09949e-06
-1.12152	-2.87018e-06	-1.12152	-3.28186e-06	-1.12152	-5.01709e-06
-1.11908	-2.85126e-06	-1.11908	-3.23975e-06	-1.11908	-4.9408e-06
-1.11664	-2.83173e-06	-1.11664	-3.19489e-06	-1.11664	-4.8645e-06
-1.1142	-2.81311e-06	-1.1142	-3.15491e-06	-1.1142	-4.79126e-06
-1.11176	-2.79236e-06	-1.11176	-3.11127e-06	-1.11176	-4.72046e-06
-1.10931	-2.77374e-06	-1.10931	-3.06763e-06	-1.10931	-4.6463e-06
-1.10687	-2.76062e-06	-1.10687	-3.02704e-06	-1.10687	-4.57001e-06
-1.10443	-2.7417e-06	-1.10443	-2.98523e-06	-1.10443	-4.4986e-06
-1.10199	-2.72522e-06	-1.10199	-2.94617e-06	-1.10199	-4.42535e-06
-1.09955	-2.71057e-06	-1.09955	-2.90527e-06	-1.09955	-4.3573e-06
-1.09711	-2.69562e-06	-1.09711	-2.8656e-06	-1.09711	-4.28558e-06
-1.09467	-2.68036e-06	-1.09467	-2.82593e-06	-1.09467	-4.21722e-06
-1.09222	-2.66235e-06	-1.09222	-2.78625e-06	-1.09222	-4.14795e-06
-1.08978	-2.64893e-06	-1.08978	-2.74872e-06	-1.08978	-4.08173e-06
-1.08734	-2.63367e-06	-1.08734	-2.71088e-06	-1.08734	-4.01489e-06
-1.0849	-2.61841e-06	-1.0849	-2.67487e-06	-1.0849	-3.94867e-06
-1.08246	-2.59857e-06	-1.08246	-2.63672e-06	-1.08246	-3.88153e-06
-1.08002	-2.58545e-06	-1.08002	-2.60071e-06	-1.08002	-3.81866e-06
-1.07758	-2.57019e-06	-1.07758	-2.56287e-06	-1.07758	-3.75458e-06
-1.07513	-2.55646e-06	-1.07513	-2.52747e-06	-1.07513	-3.69293e-06
-1.07269	-2.54303e-06	-1.07269	-2.49176e-06	-1.07269	-3.62976e-06
-1.07025	-2.52686e-06	-1.07025	-2.4588e-06	-1.07025	-3.57117e-06
-1.06781	-2.51251e-06	-1.06781	-2.4234e-06	-1.06781	-3.51318e-06
-1.06537	-2.49786e-06	-1.06537	-2.38922e-06	-1.06537	-3.45551e-06
-1.06293	-2.48413e-06	-1.06293	-2.35352e-06	-1.06293	-3.3963e-06
-1.06049	-2.47131e-06	-1.06049	-2.32269e-06	-1.06049	-3.34106e-06
-1.05804	-2.4585e-06	-1.05804	-2.29065e-06	-1.05804	-3.28613e-06
-1.0556	-2.44507e-06	-1.0556	-2.25952e-06	-1.0556	-3.2312e-06
-1.05316	-2.43134e-06	-1.05316	-2.22656e-06	-1.05316	-3.17688e-06
-1.05072	-2.42035e-06	-1.05072	-2.19696e-06	-1.05072	-3.12378e-06
-1.04828	-2.40814e-06	-1.04828	-2.16766e-06	-1.04828	-3.07404e-06
-1.04584	-2.39563e-06	-1.04584	-2.13837e-06	-1.04584	-3.01971e-06
-1.0434	-2.37885e-06	-1.0434	-2.1106e-06	-1.0434	-2.96661e-06
-1.04095	-2.36542e-06	-1.04095	-2.08069e-06	-1.04095	-2.91718e-06
-1.03851	-2.35046e-06	-1.03851	-2.05048e-06	-1.03851	-2.86743e-06
-1.03607	-2.33734e-06	-1.03607	-2.02484e-06	-1.03607	-2.81738e-06
-1.03363	-2.32422e-06	-1.03363	-1.99707e-06	-1.03363	-2.76733e-06
-1.03119	-2.3114e-06	-1.03119	-1.97235e-06	-1.03119	-2.72034e-06
-1.02875	-2.29797e-06	-1.02875	-1.9458e-06	-1.02875	-2.67212e-06
-1.02631	-2.28699e-06	-1.02631	-1.91833e-06	-1.02631	-2.62482e-06
-1.02386	-2.27142e-06	-1.02386	-1.89362e-06	-1.02386	-2.57782e-06
-1.02142	-2.25922e-06	-1.02142	-1.86798e-06	-1.02142	-2.53418e-06
-1.01898	-2.2464e-06	-1.01898	-1.84113e-06	-1.01898	-2.48901e-06
-1.01654	-2.23236e-06	-1.01654	-1.81854e-06	-1.01654	-2.44476e-06
-1.0141	-2.21893e-06	-1.0141	-1.79321e-06	-1.0141	-2.3999e-06
-1.01166	-2.20459e-06	-1.01166	-1.77094e-06	-1.01166	-2.35779e-06
-1.00922	-2.19116e-06	-1.00922	-1.74683e-06	-1.00922	-2.31506e-06
-1.00677	-2.18109e-06	-1.00677	-1.72424e-06	-1.00677	-2.27295e-06
-1.00433	-2.16766e-06	-1.00433	-1.70135e-06	-1.00433	-2.23145e-06
-1.00189	-2.15607e-06	-1.00189	-1.67938e-06	-1.00189	-2.19238e-06
-0.99945	-2.14325e-06	-0.99945	-1.6568e-06	-0.99945	-2.15057e-06
-0.99701	-2.13196e-06	-0.99701	-1.63635e-06	-0.99701	-2.11212e-06
-0.99457	-2.11945e-06	-0.99457	-1.61285e-06	-0.99457	-2.07275e-06
-0.99213	-2.10785e-06	-0.99213	-1.59393e-06	-0.99213	-2.03522e-06
-0.98969	-2.09595e-06	-0.98969	-1.57166e-06	-0.98969	-1.9986e-06
-0.98724	-2.08771e-06	-0.98724	-1.55121e-06	-0.98724	-1.96259e-06
-0.9848	-2.07794e-06	-0.9848	-1.53107e-06	-0.9848	-1.92566e-06
-0.98236	-2.06665e-06	-0.98236	-1.51276e-06	-0.98236	-1.89178e-06
-0.97992	-2.05505e-06	-0.97992	-1.49261e-06	-0.97992	-1.85516e-06
-0.97748	-2.04407e-06	-0.97748	-1.47278e-06	-0.97748	-1.82281e-06
-0.97504	-2.03278e-06	-0.97504	-1.45355e-06	-0.97504	-1.78925e-06
-0.9726	-2.02332e-06	-0.9726	-1.43402e-06	-0.9726	-1.75568e-06
-0.97015	-2.01416e-06	-0.97015	-1.41449e-06	-0.97015	-1.72302e-06
-0.96771	-2.00348e-06	-0.96771	-1.39526e-06	-0.96771	-1.69312e-06
-0.96527	-1.99188e-06	-0.96527	-1.37756e-06	-0.96527	-1.66077e-06
-0.96283	-1.97968e-06	-0.96283	-1.36047e-06	-0.96283	-1.62994e-06
-0.96039	-1.96686e-06	-0.96039	-1.33942e-06	-0.96039	-1.59912e-06
-0.95795	-1.95648e-06	-0.95795	-1.32599e-06	-0.95795	-1.57074e-06
-0.95551	-1.94489e-06	-0.95551	-1.30798e-06	-0.95551	-1.54114e-06
-0.95306	-1.93512e-06	-0.95306	-1.29028e-06	-0.95306	-1.51215e-06
-0.95062	-1.92352e-06	-0.95062	-1.2738e-06	-0.95062	-1.48376e-06
-0.94818	-1.91406e-06	-0.94818	-1.25885e-06	-0.94818	-1.45569e-06
-0.94574	-1.90521e-06	-0.94574	-1.2442e-06	-0.94574	-1.42975e-06
-0.9433	-1.89453e-06	-0.9433	-1.22772e-06	-0.9433	-1.40259e-06
-0.94086	-1.88385e-06	-0.94086	-1.21155e-06	-0.94086	-1.37451e-06
-0.93842	-1.87531e-06	-0.93842	-1.19659e-06	-0.93842	-1.35101e-06
-0.93597	-1.86707e-06	-0.93597	-1.18134e-06	-0.93597	-1.32507e-06
-0.93353	-1.85455e-06	-0.93353	-1.16791e-06	-0.93353	-1.29883e-06
-0.93109	-1.84509e-06	-0.93109	-1.15173e-06	-0.93109	-1.27441e-06
-0.92865	-1.83319e-06	-0.92865	-1.1377e-06	-0.92865	-1.25e-06
-0.92621	-1.82465e-06	-0.92621	-1.12488e-06	-0.92621	-1.2262e-06
-0.92377	-1.81519e-06	-0.92377	-1.11084e-06	-0.92377	-1.20331e-06
-0.92133	-1.80359e-06	-0.92133	-1.09589e-06	-0.92133	-1.17859e-06
-0.91888	-1.79169e-06	-0.91888	-1.08368e-06	-0.91888	-1.15692e-06
-0.91644	-1.78375e-06	-0.91644	-1.06964e-06	-0.91644	-1.13525e-06
-0.914	-1.7749e-06	-0.914	-1.05652e-06	-0.914	-1.11542e-06
-0.91156	-1.76514e-06	-0.91156	-1.04279e-06	-0.91156	-1.09253e-06
-0.90912	-1.75629e-06	-0.90912	-1.02997e-06	-0.90912	-1.07147e-06
-0.90668	-1.74591e-06	-0.90668	-1.01654e-06	-0.90668	-1.05103e-06
-0.90424	-1.73553e-06	-0.90424	-1.00555e-06	-0.90424	-1.03241e-06
-0.90179	-1.72607e-06	-0.90179	-9.94873e-07	-0.90179	-1.01044e-06
-0.89935	-1.71539e-06	-0.89935	-9.8114e-07	-0.89935	-9.92737e-07
-0.89691	-1.70624e-06	-0.89691	-9.69849e-07	-0.89691	-9.72595e-07
-0.89447	-1.69617e-06	-0.89447	-9.59473e-07	-0.89447	-9.53979e-07
-0.89203	-1.68579e-06	-0.89203	-9.47266e-07	-0.89203	-9.36584e-07
-0.88959	-1.67816e-06	-0.88959	-9.35364e-07	-0.88959	-9.18579e-07
-0.88715	-1.6687e-06	-0.88715	-9.23157e-07	-0.88715	-8.99658e-07
-0.8847	-1.6568e-06	-0.8847	-9.13086e-07	-0.8847	-8.83179e-07
-0.88226	-1.64673e-06	-0.88226	-9.01489e-07	-0.88226	-8.65784e-07
-0.87982	-1.63757e-06	-0.87982	-8.91418e-07	-0.87982	-8.5022e-07
-0.87738	-1.62872e-06	-0.87738	-8.80432e-07	-0.87738	-8.34656e-07
-0.87494	-1.61926e-06	-0.87494	-8.69751e-07	-0.87494	-8.17871e-07
-0.8725	-1.60706e-06	-0.8725	-8.60291e-07	-0.8725	-8.02307e-07
-0.87006	-1.59912e-06	-0.87006	-8.48389e-07	-0.87006	-7.85828e-07
-0.86761	-1.58966e-06	-0.86761	-8.40149e-07	-0.86761	-7.69348e-07
-0.86517	-1.58142e-06	-0.86517	-8.30078e-07	-0.86517	-7.56531e-07
-0.86273	-1.57257e-06	-0.86273	-8.19397e-07	-0.86273	-7.40356e-07
-0.86029	-1.56342e-06	-0.86029	-8.11768e-07	-0.86029	-7.28455e-07
-0.85785	-1.55426e-06	-0.85785	-8.02307e-07	-0.85785	-7.13196e-07
-0.85541	-1.54297e-06	-0.85541	-7.91931e-07	-0.85541	-6.97632e-07
-0.85297	-1.53564e-06	-0.85297	-7.84607e-07	-0.85297	-6.82983e-07
-0.85052	-1.52588e-06	-0.85052	-7.74841e-07	-0.85052	-6.70776e-07
-0.84808	-1.51703e-06	-0.84808	-7.64771e-07	-0.84808	-6.5979e-07
-0.84564	-1.5094e-06	-0.84564	-7.58362e-07	-0.84564	-6.45447e-07
-0.8432	-1.49902e-06	-0.8432	-7.47375e-07	-0.8432	-6.32324e-07
-0.84076	-1.49017e-06	-0.84076	-7.40051e-07	-0.84076	-6.21643e-07
-0.83832	-1.47827e-06	-0.83832	-7.32727e-07	-0.83832	-6.07605e-07
-0.83588	-1.47125e-06	-0.83588	-7.25098e-07	-0.83588	-5.96619e-07
-0.83344	-1.46149e-06	-0.83344	-7.18384e-07	-0.83344	-5.84717e-07
-0.83099	-1.45233e-06	-0.83099	-7.09534e-07	-0.83099	-5.73425e-07
-0.82855	-1.44409e-06	-0.82855	-7.02209e-07	-0.82855	-5.62744e-07
-0.82611	-1.43524e-06	-0.82611	-6.95496e-07	-0.82611	-5.51758e-07
-0.82367	-1.42517e-06	-0.82367	-6.84814e-07	-0.82367	-5.38025e-07
-0.82123	-1.41571e-06	-0.82123	-6.82068e-07	-0.82123	-5.2887e-07
-0.81879	-1.40594e-06	-0.81879	-6.71997e-07	-0.81879	-5.17578e-07
-0.81635	-1.40015e-06	-0.81635	-6.66199e-07	-0.81635	-5.07202e-07
-0.8139	-1.39008e-06	-0.8139	-6.60095e-07	-0.8139	-4.95605e-07
-0.81146	-1.38153e-06	-0.81146	-6.53076e-07	-0.81146	-4.86755e-07
-0.80902	-1.37115e-06	-0.80902	-6.45752e-07	-0.80902	-4.76074e-07
-0.80658	-1.36292e-06	-0.80658	-6.40564e-07	-0.80658	-4.66614e-07
-0.80414	-1.35437e-06	-0.80414	-6.3385e-07	-0.80414	-4.54712e-07
-0.8017	-1.34735e-06	-0.8017	-6.28662e-07	-0.8017	-4.4574e-07
-0.79926	-1.3385e-06	-0.79926	-6.21643e-07	-0.79926	-4.35638e-07
-0.79681	-1.32965e-06	-0.79681	-6.16455e-07	-0.79681	-4.28619e-07
-0.79437	-1.32141e-06	-0.79437	-6.09436e-07	-0.79437	-4.18274e-07
-0.79193	-1.31287e-06	-0.79193	-6.03638e-07	-0.79193	-4.0918e-07
-0.78949	-1.30432e-06	-0.78949	-5.98145e-07	-0.78949	-4.00116e-07
-0.78705	-1.29669e-06	-0.78705	-5.92041e-07	-0.78705	-3.91724e-07
-0.78461	-1.28815e-06	-0.78461	-5.86243e-07	-0.78461	-3.83484e-07
-0.78217	-1.27991e-06	-0.78217	-5.81665e-07	-0.78217	-3.73962e-07
-0.77972	-1.27197e-06	-0.77972	-5.76477e-07	-0.77972	-3.64838e-07
-0.77728	-1.26251e-06	-0.77728	-5.70679e-07	-0.77728	-3.56873e-07
-0.77484	-1.25366e-06	-0.77484	-5.64575e-07	-0.77484	-3.48511e-07
-0.7724	-1.24573e-06	-0.7724	-5.57861e-07	-0.7724	-3.40424e-07
-0.76996	-1.2381e-06	-0.76996	-5.53284e-07	-0.76996	-3.3252e-07
-0.76752	-1.22986e-06	-0.76752	-5.47791e-07	-0.76752	-3.25348e-07
-0.76508	-1.2204e-06	-0.76508	-5.42297e-07	-0.76508	-3.15277e-07
-0.76263	-1.21185e-06	-0.76263	-5.39246e-07	-0.76263	-3.08777e-07
-0.76019	-1.20514e-06	-0.76019	-5.33142e-07	-0.76019	-3.00934e-07
-0.75775	-1.19751e-06	-0.75775	-5.3009e-07	-0.75775	-2.93854e-07
-0.75531	-1.18958e-06	-0.75531	-5.22461e-07	-0.75531	-2.88483e-07
-0.75287	-1.18317e-06	-0.75287	-5.19104e-07	-0.75287	-2.80457e-07
-0.75043	-1.17432e-06	-0.75043	-5.1178e-07	-0.75043	-2.72186e-07
-0.74799	-1.16669e-06	-0.74799	-5.09949e-07	-0.74799	-2.68219e-07
-0.74554	-1.15845e-06	-0.74554	-5.04761e-07	-0.74554	-2.6123e-07
-0.7431	-1.1499e-06	-0.7431	-5.00793e-07	-0.7431	-2.54791e-07
-0.74066	-1.14136e-06	-0.74066	-4.97131e-07	-0.74066	-2.48596e-07
-0.73822	-1.13312e-06	-0.73822	-4.91638e-07	-0.73822	-2.4234e-07
-0.73578	-1.12549e-06	-0.73578	-4.88892e-07	-0.73578	-2.37457e-07
-0.73334	-1.11786e-06	-0.73334	-4.83093e-07	-0.73334	-2.32178e-07
-0.7309	-1.10992e-06	-0.7309	-4.80042e-07	-0.7309	-2.26807e-07
-0.72845	-1.10199e-06	-0.72845	-4.76074e-07	-0.72845	-2.2168e-07
-0.72601	-1.09497e-06	-0.72601	-4.72595e-07	-0.72601	-2.16034e-07
-0.72357	-1.08765e-06	-0.72357	-4.68323e-07	-0.72357	-2.10419e-07
-0.72113	-1.08063e-06	-0.72113	-4.6402e-07	-0.72113	-2.06055e-07
-0.71869	-1.07361e-06	-0.71869	-4.62463e-07	-0.71869	-2.01599e-07
-0.71625	-1.06659e-06	-0.71625	-4.59625e-07	-0.71625	-1.96991e-07
-0.71381	-1.05652e-06	-0.71381	-4.55048e-07	-0.71381	-1.90918e-07
-0.71136	-1.0495e-06	-0.71136	-4.53064e-07	-0.71136	-1.85486e-07
-0.70892	-1.04126e-06	-0.70892	-4.50745e-07	-0.70892	-1.82556e-07
-0.70648	-1.03333e-06	-0.70648	-4.46228e-07	-0.70648	-1.77826e-07
-0.70404	-1.02509e-06	-0.70404	-4.43054e-07	-0.70404	-1.73615e-07
-0.7016	-1.01776e-06	-0.7016	-4.40155e-07	-0.7016	-1.67023e-07
-0.69916	-1.00922e-06	-0.69916	-4.35669e-07	-0.69916	-1.62201e-07
-0.69672	-1.00006e-06	-0.69672	-4.34113e-07	-0.69672	-1.60614e-07
-0.69427	-9.93652e-07	-0.69427	-4.3158e-07	-0.69427	-1.54114e-07
-0.69183	-9.85718e-07	-0.69183	-4.28741e-07	-0.69183	-1.5094e-07
-0.68939	-9.80225e-07	-0.68939	-4.26178e-07	-0.68939	-1.45935e-07
-0.68695	-9.72595e-07	-0.68695	-4.22485e-07	-0.68695	-1.41968e-07
-0.68451	-9.65271e-07	-0.68451	-4.21692e-07	-0.68451	-1.36902e-07
-0.68207	-9.58252e-07	-0.68207	-4.17603e-07	-0.68207	-1.34918e-07
-0.67963	-9.50317e-07	-0.67963	-4.15375e-07	-0.67963	-1.3089e-07
-0.67719	-9.44824e-07	-0.67719	-4.10858e-07	-0.67719	-1.26892e-07
-0.67474	-9.38721e-07	-0.67474	-4.08295e-07	-0.67474	-1.23932e-07
-0.6723	-9.2865e-07	-0.6723	-4.06281e-07	-0.6723	-1.21307e-07
-0.66986	-9.22546e-07	-0.66986	-4.03381e-07	-0.66986	-1.17737e-07
-0.66742	-9.15222e-07	-0.66742	-4.00452e-07	-0.66742	-1.15143e-07
-0.66498	-9.06372e-07	-0.66498	-3.97003e-07	-0.66498	-1.12457e-07
-0.66254	-8.99048e-07	-0.66254	-3.94104e-07	-0.66254	-1.0907e-07
-0.6601	-8.92944e-07	-0.6601	-3.90991e-07	-0.6601	-1.05835e-07
-0.65765	-8.86536e-07	-0.65765	-3.8797e-07	-0.65765	-1.01471e-07
-0.65521	-8.81653e-07	-0.65521	-3.84918e-07	-0.65521	-1.00525e-07
-0.65277	-8.74329e-07	-0.65277	-3.81622e-07	-0.65277	-9.63135e-08
-0.65033	-8.68225e-07	-0.65033	-3.78113e-07	-0.65033	-9.32617e-08
-0.64789	-8.60596e-07	-0.64789	-3.73566e-07	-0.64789	-8.89893e-08
-0.64545	-8.51746e-07	-0.64545	-3.71887e-07	-0.64545	-8.74023e-08
-0.64301	-8.45032e-07	-0.64301	-3.67981e-07	-0.64301	-8.44421e-08
-0.64056	-8.37097e-07	-0.64056	-3.65234e-07	-0.64056	-8.30383e-08
-0.63812	-8.30383e-07	-0.63812	-3.61145e-07	-0.63812	-7.91931e-08
-0.63568	-8.25195e-07	-0.63568	-3.58154e-07	-0.63568	-7.63855e-08
-0.63324	-8.17566e-07	-0.63324	-3.5498e-07	-0.63324	-7.34558e-08
-0.6308	-8.11157e-07	-0.6308	-3.52539e-07	-0.6308	-7.34253e-08
-0.62836	-8.02002e-07	-0.62836	-3.48785e-07	-0.62836	-6.90918e-08
-0.62592	-7.97424e-07	-0.62592	-3.45184e-07	-0.62592	-6.70471e-08
-0.62347	-7.9071e-07	-0.62347	-3.41644e-07	-0.62347	-6.49414e-08
-0.62103	-7.83691e-07	-0.62103	-3.37982e-07	-0.62103	-6.26831e-08
-0.61859	-7.76978e-07	-0.61859	-3.36334e-07	-0.61859	-5.85022e-08
-0.61615	-7.70264e-07	-0.61615	-3.32703e-07	-0.61615	-5.63049e-08
-0.61371	-7.6355e-07	-0.61371	-3.29102e-07	-0.61371	-5.3894e-08
-0.61127	-7.57446e-07	-0.61127	-3.25684e-07	-0.61127	-5.26123e-08
-0.60883	-7.49817e-07	-0.60883	-3.23486e-07	-0.60883	-4.98352e-08
-0.60638	-7.43103e-07	-0.60638	-3.19977e-07	-0.60638	-4.72717e-08
-0.60394	-7.36389e-07	-0.60394	-3.16467e-07	-0.60394	-4.44641e-08
-0.6015	-7.30896e-07	-0.6015	-3.14026e-07	-0.6015	-4.24194e-08
-0.59906	-7.22961e-07	-0.59906	-3.09998e-07	-0.59906	-4.21143e-08
-0.59662	-7.17773e-07	-0.59662	-3.06732e-07	-0.59662	-3.83301e-08
-0.59418	-7.09534e-07	-0.59418	-3.02917e-07	-0.59418	-3.6377e-08
-0.59174	-7.02515e-07	-0.59174	-3.00323e-07	-0.59174	-3.51257e-08
-0.58929	-6.9519e-07	-0.58929	-2.98004e-07	-0.58929	-3.32031e-08
-0.58685	-6.90918e-07	-0.58685	-2.93793e-07	-0.58685	-3.07007e-08
-0.58441	-6.82983e-07	-0.58441	-2.93427e-07	-0.58441	-2.85645e-08
-0.58197	-6.76575e-07	-0.58197	-2.89032e-07	-0.58197	-2.70386e-08
-0.57953	-6.69556e-07	-0.57953	-2.84698e-07	-0.57953	-2.52075e-08
-0.57709	-6.64673e-07	-0.57709	-2.81342e-07	-0.57709	-2.33765e-08
-0.57465	-6.57959e-07	-0.57465	-2.79083e-07	-0.57465	-2.28882e-08
-0.5722	-6.5094e-07	-0.5722	-2.75757e-07	-0.5722	-2.05688e-08
-0.56976	-6.43005e-07	-0.56976	-2.72736e-07	-0.56976	-1.70898e-08
-0.56732	-6.37207e-07	-0.56732	-2.69684e-07	-0.56732	-1.65405e-08
-0.56488	-6.30493e-07	-0.56488	-2.659e-07	-0.56488	-1.43433e-08
-0.56244	-6.23779e-07	-0.56244	-2.63794e-07	-0.56244	-1.20544e-08
-0.56	-6.17065e-07	-0.56	-2.6181e-07	-0.56	-1.24817e-08
-0.55756	-6.10962e-07	-0.55756	-2.58057e-07	-0.55756	-8.81958e-09
-0.55511	-6.02722e-07	-0.55511	-2.55707e-07	-0.55511	-7.65991e-09
-0.55267	-5.9845e-07	-0.55267	-2.5415e-07	-0.55267	-6.57349e-09
-0.55023	-5.896e-07	-0.55023	-2.51038e-07	-0.55023	-4.45557e-09
-0.54779	-5.84717e-07	-0.54779	-2.48505e-07	-0.54779	-3.90625e-09
-0.54535	-5.78003e-07	-0.54535	-2.45422e-07	-0.54535	-5.15747e-10
-0.54291	-5.71289e-07	-0.54291	-2.41486e-07	-0.54291	1.27258e-09
-0.54047	-5.63965e-07	-0.54047	-2.39319e-07	-0.54047	2.09961e-09
-0.53802	-5.56641e-07	-0.53802	-2.37335e-07	-0.53802	5.70679e-09
-0.53558	-5.51147e-07	-0.53558	-2.33978e-07	-0.53558	6.10352e-09
-0.53314	-5.42297e-07	-0.53314	-2.31598e-07	-0.53314	7.62939e-09
-0.5307	-5.36194e-07	-0.5307	-2.29614e-07	-0.5307	9.49097e-09
-0.52826	-5.30701e-07	-0.52826	-2.26288e-07	-0.52826	1.15051e-08
-0.52582	-5.24597e-07	-0.52582	-2.2406e-07	-0.52582	1.39618e-08
-0.52338	-5.17883e-07	-0.52338	-2.22015e-07	-0.52338	1.4801e-08
-0.52094	-5.10864e-07	-0.52094	-2.18201e-07	-0.52094	1.58997e-08
-0.51849	-5.05371e-07	-0.51849	-2.15088e-07	-0.51849	1.91956e-08
-0.51605	-4.98047e-07	-0.51605	-2.14813e-07	-0.51605	1.95618e-08
-0.51361	-4.91333e-07	-0.51361	-2.10693e-07	-0.51361	2.09961e-08
-0.51117	-4.86145e-07	-0.51117	-2.09686e-07	-0.51117	2.28271e-08
-0.50873	-4.77905e-07	-0.50873	-2.07367e-07	-0.50873	2.49939e-08
-0.50629	-4.73022e-07	-0.50629	-2.0517e-07	-0.50629	2.75269e-08
-0.50385	-4.66248e-07	-0.50385	-2.034e-07	-0.50385	2.89001e-08
-0.5014	-4.58252e-07	-0.5014	-2.00409e-07	-0.5014	3.09753e-08
-0.49896	-4.51263e-07	-0.49896	-1.9754e-07	-0.49896	3.32947e-08
-0.49652	-4.44092e-07	-0.49652	-1.95465e-07	-0.49652	3.51563e-08
-0.49408	-4.37836e-07	-0.49408	-1.93726e-07	-0.49408	3.56445e-08
-0.49164	-4.30786e-07	-0.49164	-1.92688e-07	-0.49164	3.93066e-08
-0.4892	-4.24347e-07	-0.4892	-1.89667e-07	-0.4892	3.95508e-08
-0.48676	-4.18854e-07	-0.48676	-1.87958e-07	-0.48676	4.2511e-08
-0.48431	-4.12811e-07	-0.48431	-1.84814e-07	-0.48431	4.26025e-08
-0.48187	-4.05365e-07	-0.48187	-1.83655e-07	-0.48187	4.53796e-08
-0.47943	-3.99017e-07	-0.47943	-1.7923e-07	-0.47943	4.61121e-08
-0.47699	-3.92151e-07	-0.47699	-1.77155e-07	-0.47699	4.7821e-08
-0.47455	-3.86505e-07	-0.47455	-1.74133e-07	-0.47455	4.96216e-08
-0.47211	-3.78906e-07	-0.47211	-1.71875e-07	-0.47211	5.24597e-08
-0.46967	-3.72437e-07	-0.46967	-1.68488e-07	-0.46967	5.27954e-08
-0.46722	-3.67432e-07	-0.46722	-1.65741e-07	-0.46722	5.58167e-08
-0.46478	-3.59253e-07	-0.46478	-1.63696e-07	-0.46478	5.72205e-08
-0.46234	-3.53149e-07	-0.46234	-1.60889e-07	-0.46234	5.84412e-08
-0.4599	-3.46222e-07	-0.4599	-1.57654e-07	-0.4599	5.98145e-08
-0.45746	-3.40302e-07	-0.45746	-1.55396e-07	-0.45746	6.26526e-08
-0.45502	-3.35663e-07	-0.45502	-1.52435e-07	-0.45502	6.38733e-08
-0.45258	-3.29132e-07	-0.45258	-1.50421e-07	-0.45258	6.59485e-08
-0.45013	-3.21686e-07	-0.45013	-1.45996e-07	-0.45013	6.67114e-08
-0.44769	-3.15399e-07	-0.44769	-1.44531e-07	-0.44769	6.91528e-08
-0.44525	-3.08838e-07	-0.44525	-1.41785e-07	-0.44525	6.99158e-08
-0.44281	-3.01697e-07	-0.44281	-1.38672e-07	-0.44281	7.26318e-08
-0.44037	-2.95654e-07	-0.44037	-1.36505e-07	-0.44037	7.32727e-08
-0.43793	-2.87842e-07	-0.43793	-1.33392e-07	-0.43793	7.56531e-08
-0.43549	-2.83295e-07	-0.43549	-1.31104e-07	-0.43549	7.69958e-08
-0.43304	-2.76306e-07	-0.43304	-1.28906e-07	-0.43304	7.87964e-08
-0.4306	-2.6947e-07	-0.4306	-1.25397e-07	-0.4306	7.88269e-08
-0.42816	-2.6355e-07	-0.42816	-1.2265e-07	-0.42816	8.17261e-08
-0.42572	-2.56836e-07	-0.42572	-1.18744e-07	-0.42572	8.37402e-08
-0.42328	-2.50122e-07	-0.42328	-1.17645e-07	-0.42328	8.46252e-08
-0.42084	-2.44385e-07	-0.42084	-1.14716e-07	-0.42084	8.63037e-08
-0.4184	-2.38708e-07	-0.4184	-1.13647e-07	-0.4184	8.89587e-08
-0.41595	-2.32391e-07	-0.41595	-1.10535e-07	-0.41595	8.92334e-08
-0.41351	-2.25861e-07	-0.41351	-1.06873e-07	-0.41351	9.13391e-08
-0.41107	-2.20642e-07	-0.41107	-1.03973e-07	-0.41107	9.32617e-08
-0.40863	-2.13654e-07	-0.40863	-1.0141e-07	-0.40863	9.43604e-08
-0.40619	-2.0871e-07	-0.40619	-9.94873e-08	-0.40619	9.66797e-08
-0.40375	-2.02423e-07	-0.40375	-9.63135e-08	-0.40375	9.63135e-08
-0.40131	-1.9873e-07	-0.40131	-9.31091e-08	-0.40131	9.85413e-08
-0.39886	-1.91315e-07	-0.39886	-9.12476e-08	-0.39886	9.9823e-08
-0.39642	-1.86554e-07	-0.39642	-8.74329e-08	-0.39642	1.01837e-07
-0.39398	-1.79932e-07	-0.39398	-8.57544e-08	-0.39398	1.03485e-07
-0.39154	-1.75507e-07	-0.39154	-8.28247e-08	-0.39154	1.06049e-07
-0.3891	-1.68762e-07	-0.3891	-8.06885e-08	-0.3891	1.06628e-07
-0.38666	-1.64032e-07	-0.38666	-7.79419e-08	-0.38666	1.0791e-07
-0.38422	-1.57959e-07	-0.38422	-7.50122e-08	-0.38422	1.1026e-07
-0.38177	-1.52405e-07	-0.38177	-7.4707e-08	-0.38177	1.12e-07
-0.37933	-1.47125e-07	-0.37933	-7.09839e-08	-0.37933	1.13647e-07
-0.37689	-1.42456e-07	-0.37689	-6.75659e-08	-0.37689	1.14319e-07
-0.37445	-1.36566e-07	-0.37445	-6.69861e-08	-0.37445	1.16486e-07
-0.37201	-1.32568e-07	-0.37201	-6.39038e-08	-0.37201	1.16486e-07
-0.36957	-1.24359e-07	-0.36957	-6.22253e-08	-0.36957	1.18774e-07
-0.36713	-1.21521e-07	-0.36713	-5.97534e-08	-0.36713	1.20544e-07
-0.36469	-1.15601e-07	-0.36469	-5.78918e-08	-0.36469	1.21613e-07
-0.36224	-1.11023e-07	-0.36224	-5.60608e-08	-0.36224	1.24115e-07
-0.3598	-1.06598e-07	-0.3598	-5.51147e-08	-0.3598	1.25519e-07
-0.35736	-1.0257e-07	-0.35736	-5.13611e-08	-0.35736	1.27167e-07
-0.35492	-9.73816e-08	-0.35492	-4.98047e-08	-0.35492	1.27899e-07
-0.35248	-9.15833e-08	-0.35248	-4.79431e-08	-0.35248	1.27991e-07
-0.35004	-8.79822e-08	-0.35004	-4.73328e-08	-0.35004	1.30096e-07
-0.3476	-8.39539e-08	-0.3476	-4.43115e-08	-0.3476	1.32446e-07
-0.34515	-7.8949e-08	-0.34515	-4.2511e-08	-0.34515	1.33698e-07
-0.34271	-7.4646e-08	-0.34271	-4.05884e-08	-0.34271	1.36383e-07
-0.34027	-7.04041e-08	-0.34027	-3.7384e-08	-0.34027	1.36292e-07
-0.33783	-6.66809e-08	-0.33783	-3.49121e-08	-0.33783	1.37817e-07
-0.33539	-6.28052e-08	-0.33539	-3.33252e-08	-0.33539	1.39282e-07
-0.33295	-5.82886e-08	-0.33295	-3.33252e-08	-0.33295	1.41296e-07
-0.33051	-5.3833e-08	-0.33051	-2.98157e-08	-0.33051	1.42029e-07
-0.32806	-4.97131e-08	-0.32806	-2.86255e-08	-0.32806	1.44257e-07
-0.32562	-4.44641e-08	-0.32562	-2.62146e-08	-0.32562	1.45142e-07
-0.32318	-4.23584e-08	-0.32318	-2.40479e-08	-0.32318	1.4679e-07
-0.32074	-3.79639e-08	-0.32074	-2.10571e-08	-0.32074	1.48346e-07
-0.3183	-3.3844e-08	-0.3183	-1.84631e-08	-0.3183	1.47919e-07
-0.31586	-3.03955e-08	-0.31586	-1.57166e-08	-0.31586	1.5213e-07
-0.31342	-2.63367e-08	-0.31342	-1.52161e-08	-0.31342	1.51581e-07
-0.31097	-2.2522e-08	-0.31097	-1.26038e-08	-0.31097	1.52344e-07
-0.30853	-1.95618e-08	-0.30853	-9.33533e-09	-0.30853	1.53778e-07
-0.30609	-1.57166e-08	-0.30609	-7.65991e-09	-0.30609	1.56067e-07
-0.30365	-1.23291e-08	-0.30365	-5.94482e-09	-0.30365	1.5744e-07
-0.30121	-8.57544e-09	-0.30121	-3.57056e-09	-0.30121	1.58783e-07
-0.29877	-6.46973e-09	-0.29877	-1.7395e-09	-0.29877	1.6098e-07
-0.29633	-2.31934e-09	-0.29633	1.52588e-10	-0.29633	1.61469e-07
-0.29388	1.52588e-10	-0.29388	2.15759e-09	-0.29388	1.63452e-07
-0.29144	3.63159e-09	-0.29144	4.73633e-09	-0.29144	1.64948e-07
-0.289	6.79932e-09	-0.289	6.97632e-09	-0.289	1.64703e-07
-0.28656	9.64355e-09	-0.28656	1.00006e-08	-0.28656	1.67847e-07
-0.28412	1.19629e-08	-0.28412	1.17188e-08	-0.28412	1.6806e-07
-0.28168	1.54114e-08	-0.28168	1.47095e-08	-0.28168	1.69037e-07
-0.27924	1.80969e-08	-0.27924	1.66626e-08	-0.27924	1.71082e-07
-0.27679	2.14844e-08	-0.27679	1.97449e-08	-0.27679	1.72241e-07
-0.27435	2.31018e-08	-0.27435	2.07214e-08	-0.27435	1.74225e-07
-0.27191	2.55127e-08	-0.27191	2.47192e-08	-0.27191	1.75537e-07
-0.26947	2.92053e-08	-0.26947	2.54822e-08	-0.26947	1.77155e-07
-0.26703	3.22876e-08	-0.26703	2.80762e-08	-0.26703	1.78009e-07
-0.26459	3.50647e-08	-0.26459	3.17383e-08	-0.26459	1.79688e-07
-0.26215	3.77808e-08	-0.26215	3.40881e-08	-0.26215	1.80603e-07
-0.2597	4.11377e-08	-0.2597	3.53699e-08	-0.2597	1.83105e-07
-0.25726	4.36096e-08	-0.25726	3.8147e-08	-0.25726	1.84448e-07
-0.25482	4.58984e-08	-0.25482	3.95508e-08	-0.25482	1.85547e-07
-0.25238	4.79431e-08	-0.25238	4.38538e-08	-0.25238	1.8576e-07
-0.24994	5.05981e-08	-0.24994	4.5929e-08	-0.24994	1.87042e-07
-0.2475	5.27954e-08	-0.2475	4.89807e-08	-0.2475	1.87775e-07
-0.24506	5.62439e-08	-0.24506	5.04761e-08	-0.24506	1.89514e-07
-0.24261	5.77393e-08	-0.24261	5.13611e-08	-0.24261	1.92291e-07
-0.24017	5.97229e-08	-0.24017	5.44434e-08	-0.24017	1.94061e-07
-0.23773	6.30493e-08	-0.23773	5.87463e-08	-0.23773	1.95313e-07
-0.23529	6.61011e-08	-0.23529	6.09741e-08	-0.23529	1.95709e-07
-0.23285	6.73828e-08	-0.23285	6.30188e-08	-0.23285	1.97052e-07
-0.23041	6.86646e-08	-0.23041	6.604e-08	-0.23041	1.96869e-07
-0.22797	7.10144e-08	-0.22797	6.75659e-08	-0.22797	1.99829e-07
-0.22552	7.23267e-08	-0.22552	6.97937e-08	-0.22552	2.02423e-07
-0.22308	7.5592e-08	-0.22308	7.22351e-08	-0.22308	2.02576e-07
-0.22064	7.69043e-08	-0.22064	7.58667e-08	-0.22064	2.03522e-07
-0.2182	7.91931e-08	-0.2182	7.72095e-08	-0.2182	2.04376e-07
-0.21576	8.09326e-08	-0.21576	7.8125e-08	-0.21576	2.07611e-07
-0.21332	8.38318e-08	-0.21332	8.11462e-08	-0.21332	2.09167e-07
-0.21088	8.41675e-08	-0.21088	8.25195e-08	-0.21088	2.10083e-07
-0.20844	8.69446e-08	-0.20844	8.64563e-08	-0.20844	2.10754e-07
-0.20599	8.90198e-08	-0.20599	8.78601e-08	-0.20599	2.12097e-07
-0.20355	9.09424e-08	-0.20355	9.12476e-08	-0.20355	2.13379e-07
-0.20111	9.26208e-08	-0.20111	9.40552e-08	-0.20111	2.14783e-07
-0.19867	9.41467e-08	-0.19867	9.57031e-08	-0.19867	2.14874e-07
-0.19623	9.52148e-08	-0.19623	9.75647e-08	-0.19623	2.17163e-07
-0.19379	9.69238e-08	-0.19379	1.00525e-07	-0.19379	2.17743e-07
-0.19135	9.82361e-08	-0.19135	1.01593e-07	-0.19135	2.20337e-07
-0.1889	1.00342e-07	-0.1889	1.04736e-07	-0.1889	2.21283e-07
-0.18646	1.02478e-07	-0.18646	1.0675e-07	-0.18646	2.2168e-07
-0.18402	1.03088e-07	-0.18402	1.1087e-07	-0.18402	2.23053e-07
-0.18158	1.04523e-07	-0.18158	1.12366e-07	-0.18158	2.24335e-07
-0.17914	1.05957e-07	-0.17914	1.14319e-07	-0.17914	2.26654e-07
-0.1767	1.06689e-07	-0.1767	1.17493e-07	-0.1767	2.26898e-07
-0.17426	1.08276e-07	-0.17426	1.19507e-07	-0.17426	2.28027e-07
-0.17181	1.08704e-07	-0.17181	1.23413e-07	-0.17181	2.29462e-07
-0.16937	1.10901e-07	-0.16937	1.24542e-07	-0.16937	2.3114e-07
-0.16693	1.1261e-07	-0.16693	1.26007e-07	-0.16693	2.32269e-07
-0.16449	1.14349e-07	-0.16449	1.3028e-07	-0.16449	2.33704e-07
-0.16205	1.1673e-07	-0.16205	1.32019e-07	-0.16205	2.35077e-07
-0.15961	1.18042e-07	-0.15961	1.36566e-07	-0.15961	2.36542e-07
-0.15717	1.19019e-07	-0.15717	1.37024e-07	-0.15717	2.37549e-07
-0.15472	1.20422e-07	-0.15472	1.38916e-07	-0.15472	2.38098e-07
-0.15228	1.20605e-07	-0.15228	1.40747e-07	-0.15228	2.40753e-07
-0.14984	1.23108e-07	-0.14984	1.44043e-07	-0.14984	2.41791e-07
-0.1474	1.23566e-07	-0.1474	1.47705e-07	-0.1474	2.42859e-07
-0.14496	1.2561e-07	-0.14496	1.49139e-07	-0.14496	2.44263e-07
-0.14252	1.27045e-07	-0.14252	1.53046e-07	-0.14252	2.44293e-07
-0.14008	1.27655e-07	-0.14008	1.54236e-07	-0.14008	2.47253e-07
-0.13763	1.28723e-07	-0.13763	1.55975e-07	-0.13763	2.48077e-07
-0.13519	1.30707e-07	-0.13519	1.59119e-07	-0.13519	2.48871e-07
-0.13275	1.31134e-07	-0.13275	1.61499e-07	-0.13275	2.50458e-07
-0.13031	1.32019e-07	-0.13031	1.63849e-07	-0.13031	2.51404e-07
-0.12787	1.34277e-07	-0.12787	1.66168e-07	-0.12787	2.53662e-07
-0.12543	1.35864e-07	-0.12543	1.69373e-07	-0.12543	2.54517e-07
-0.12299	1.36871e-07	-0.12299	1.71204e-07	-0.12299	2.55493e-07
-0.12054	1.37878e-07	-0.12054	1.72668e-07	-0.12054	2.57751e-07
-0.1181	1.38397e-07	-0.1181	1.7627e-07	-0.1181	2.57446e-07
-0.11566	1.4032e-07	-0.11566	1.78192e-07	-0.11566	2.58698e-07
-0.11322	1.42059e-07	-0.11322	1.80359e-07	-0.11322	2.61047e-07
-0.11078	1.43982e-07	-0.11078	1.82007e-07	-0.11078	2.60773e-07
-0.10834	1.43219e-07	-0.10834	1.86249e-07	-0.10834	2.63733e-07
-0.1059	1.45477e-07	-0.1059	1.88446e-07	-0.1059	2.63031e-07
-0.10345	1.46271e-07	-0.10345	1.91406e-07	-0.10345	2.65564e-07
-0.10101	1.48651e-07	-0.10101	1.93726e-07	-0.10101	2.65839e-07
-0.09857	1.47888e-07	-0.09857	1.97021e-07	-0.09857	2.68585e-07
-0.09613	1.4859e-07	-0.09613	1.99188e-07	-0.09613	2.70111e-07
-0.09369	1.49963e-07	-0.09369	2.02454e-07	-0.09369	2.70508e-07
-0.09125	1.50848e-07	-0.09125	2.03888e-07	-0.09125	2.72675e-07
-0.08881	1.52679e-07	-0.08881	2.05566e-07	-0.08881	2.73315e-07
-0.08636	1.54083e-07	-0.08636	2.10876e-07	-0.08636	2.75604e-07
-0.08392	1.54114e-07	-0.08392	2.13043e-07	-0.08392	2.74231e-07
-0.08148	1.54999e-07	-0.08148	2.15424e-07	-0.08148	2.76672e-07
-0.07904	1.56189e-07	-0.07904	2.16095e-07	-0.07904	2.77985e-07
-0.0766	1.57593e-07	-0.0766	2.19238e-07	-0.0766	2.79907e-07
-0.07416	1.59668e-07	-0.07416	2.21283e-07	-0.07416	2.8006e-07
-0.07172	1.60187e-07	-0.07172	2.2525e-07	-0.07172	2.81586e-07
-0.06927	1.6275e-07	-0.06927	2.27936e-07	-0.06927	2.82776e-07
-0.06683	1.62628e-07	-0.06683	2.30591e-07	-0.06683	2.84851e-07
-0.06439	1.61713e-07	-0.06439	2.3175e-07	-0.06439	2.86591e-07
-0.06195	1.63483e-07	-0.06195	2.35077e-07	-0.06195	2.87933e-07
-0.05951	1.64276e-07	-0.05951	2.37549e-07	-0.05951	2.88177e-07
-0.05707	1.65771e-07	-0.05707	2.39563e-07	-0.05707	2.89642e-07
-0.05463	1.65741e-07	-0.05463	2.43195e-07	-0.05463	2.90771e-07
-0.05219	1.66443e-07	-0.05219	2.45392e-07	-0.05219	2.91779e-07
-0.04974	1.69006e-07	-0.04974	2.47742e-07	-0.04974	2.93121e-07
-0.0473	1.71417e-07	-0.0473	2.50977e-07	-0.0473	2.95746e-07
-0.04486	1.70319e-07	-0.04486	2.5354e-07	-0.04486	2.95135e-07
-0.04242	1.70746e-07	-0.04242	2.56439e-07	-0.04242	2.97241e-07
-0.03998	1.70563e-07	-0.03998	2.58728e-07	-0.03998	2.97943e-07
-0.03754	1.70837e-07	-0.03754	2.62665e-07	-0.03754	2.99561e-07
-0.0351	1.72089e-07	-0.0351	2.64343e-07	-0.0351	3.00629e-07
-0.03265	1.74164e-07	-0.03265	2.65015e-07	-0.03265	3.01788e-07
-0.03021	1.7514e-07	-0.03021	2.69806e-07	-0.03021	3.03772e-07
-0.02777	1.76239e-07	-0.02777	2.70752e-07	-0.02777	3.0423e-07
-0.02533	1.75354e-07	-0.02533	2.72949e-07	-0.02533	3.04901e-07
-0.02289	1.78558e-07	-0.02289	2.78137e-07	-0.02289	3.06183e-07
-0.02045	1.7923e-07	-0.02045	2.80273e-07	-0.02045	3.07709e-07
-0.01801	1.80328e-07	-0.01801	2.81586e-07	-0.01801	3.09967e-07
-0.01556	1.81732e-07	-0.01556	2.85156e-07	-0.01556	3.11035e-07
-0.01312	1.82709e-07	-0.01312	2.86987e-07	-0.01312	3.10211e-07
-0.01068	1.84296e-07	-0.01068	2.89001e-07	-0.01068	3.14728e-07
-0.00824	1.85333e-07	-0.00824	2.93732e-07	-0.00824	3.14575e-07
-0.0058	1.85852e-07	-0.0058	2.94342e-07	-0.0058	3.14941e-07
-0.00336	1.88751e-07	-0.00336	2.96265e-07	-0.00336	3.172e-07
-0.000915527	1.90063e-07	-0.000915527	2.99561e-07	-0.000915527	3.17566e-07
0.00153	1.93176e-07	0.00153	3.02826e-07	0.00153	3.20038e-07
0.00397	1.93085e-07	0.00397	3.05267e-07	0.00397	3.20129e-07
0.00641	1.96472e-07	0.00641	3.07068e-07	0.00641	3.21014e-07
0.00885	1.97418e-07	0.00885	3.09326e-07	0.00885	3.23181e-07
0.01129	1.98364e-07	0.01129	3.12775e-07	0.01129	3.2486e-07
0.01373	1.99402e-07	0.01373	3.16498e-07	0.01373	3.24493e-07
0.01617	2.00531e-07	0.01617	3.16742e-07	0.01617	3.27728e-07
0.01862	2.00836e-07	0.01862	3.21106e-07	0.01862	3.28064e-07
0.02106	2.02728e-07	0.02106	3.22144e-07	0.02106	3.29346e-07
0.0235	2.03918e-07	0.0235	3.24524e-07	0.0235	3.30292e-07
0.02594	2.0462e-07	0.02594	3.28735e-07	0.02594	3.31482e-07
0.02838	2.05719e-07	0.02838	3.31207e-07	0.02838	3.31879e-07
0.03082	2.07123e-07	0.03082	3.33435e-07	0.03082	3.33984e-07
0.03326	2.08466e-07	0.03326	3.34961e-07	0.03326	3.35327e-07
0.03571	2.10022e-07	0.03571	3.39691e-07	0.03571	3.37219e-07
0.03815	2.10419e-07	0.03815	3.4137e-07	0.03815	3.37921e-07
0.04059	2.12006e-07	0.04059	3.42834e-07	0.04059	3.38318e-07
0.04303	2.13776e-07	0.04303	3.45947e-07	0.04303	3.40515e-07
0.04547	2.15668e-07	0.04547	3.4845e-07	0.04547	3.41492e-07
0.04791	2.18689e-07	0.04791	3.50891e-07	0.04791	3.42316e-07
0.05035	2.2168e-07	0.05035	3.53333e-07	0.05035	3.44452e-07
0.0528	2.23083e-07	0.0528	3.55377e-07	0.0528	3.45673e-07
0.05524	2.23541e-07	0.05524	3.59222e-07	0.05524	3.45428e-07
0.05768	2.24487e-07	0.05768	3.6084e-07	0.05768	3.47229e-07
0.06012	2.25159e-07	0.06012	3.63556e-07	0.06012	3.4848e-07
0.06256	2.26685e-07	0.06256	3.66913e-07	0.06256	3.49945e-07
0.065	2.2995e-07	0.065	3.69415e-07	0.065	3.51349e-07
0.06744	2.31689e-07	0.06744	3.73962e-07	0.06744	3.52448e-07
0.06989	2.32239e-07	0.06989	3.75e-07	0.06989	3.54401e-07
0.07233	2.35199e-07	0.07233	3.77197e-07	0.07233	3.54614e-07
0.07477	2.39166e-07	0.07477	3.8028e-07	0.07477	3.5614e-07
0.07721	2.40753e-07	0.07721	3.82233e-07	0.07721	3.57971e-07
0.07965	2.41272e-07	0.07965	3.85529e-07	0.07965	3.59222e-07
0.08209	2.435e-07	0.08209	3.87756e-07	0.08209	3.60291e-07
0.08453	2.44598e-07	0.08453	3.8974e-07	0.08453	3.61603e-07
0.08698	2.44751e-07	0.08698	3.92731e-07	0.08698	3.63678e-07
0.08942	2.45728e-07	0.08942	3.96301e-07	0.08942	3.63647e-07
0.09186	2.46399e-07	0.09186	4.00269e-07	0.09186	3.64441e-07
0.0943	2.47375e-07	0.0943	4.0213e-07	0.0943	3.66699e-07
0.09674	2.48169e-07	0.09674	4.04724e-07	0.09674	3.69476e-07
0.09918	2.50092e-07	0.09918	4.07379e-07	0.09918	3.68256e-07
0.10162	2.50824e-07	0.10162	4.10431e-07	0.10162	3.70209e-07
0.10406	2.51587e-07	0.10406	4.12781e-07	0.10406	3.72681e-07
0.10651	2.54669e-07	0.10651	4.16412e-07	0.10651	3.7381e-07
0.10895	2.57935e-07	0.10895	4.18884e-07	0.10895	3.75397e-07
0.11139	2.61108e-07	0.11139	4.21478e-07	0.11139	3.76862e-07
0.11383	2.63428e-07	0.11383	4.25262e-07	0.11383	3.78235e-07
0.11627	2.63123e-07	0.11627	4.27246e-07	0.11627	3.77899e-07
0.11871	2.65045e-07	0.11871	4.30603e-07	0.11871	3.80554e-07
0.12115	2.67029e-07	0.12115	4.33411e-07	0.12115	3.81165e-07
0.1236	2.69958e-07	0.1236	4.36554e-07	0.1236	3.82294e-07
0.12604	2.70538e-07	0.12604	4.39209e-07	0.12604	3.83667e-07
0.12848	2.72339e-07	0.12848	4.43756e-07	0.12848	3.85864e-07
0.13092	2.74536e-07	0.13092	4.45251e-07	0.13092	3.87604e-07
0.13336	2.76611e-07	0.13336	4.49249e-07	0.13336	3.88702e-07
0.1358	2.79205e-07	0.1358	4.50897e-07	0.1358	3.89343e-07
0.13824	2.81921e-07	0.13824	4.552e-07	0.13824	3.90259e-07
0.14069	2.85614e-07	0.14069	4.57977e-07	0.14069	3.91144e-07
0.14313	2.88727e-07	0.14313	4.60754e-07	0.14313	3.93372e-07
0.14557	2.9184e-07	0.14557	4.6402e-07	0.14557	3.94775e-07
0.14801	2.96722e-07	0.14801	4.68811e-07	0.14801	3.96454e-07
0.15045	2.97607e-07	0.15045	4.70154e-07	0.15045	3.9798e-07
0.15289	3.01697e-07	0.15289	4.75006e-07	0.15289	3.99078e-07
0.15533	3.03345e-07	0.15533	4.77203e-07	0.15533	3.99811e-07
0.15778	3.05176e-07	0.15778	4.80499e-07	0.15778	4.01398e-07
0.16022	3.08136e-07	0.16022	4.84009e-07	0.16022	4.04175e-07
0.16266	3.1189e-07	0.16266	4.87e-07	0.16266	4.04663e-07
0.1651	3.15521e-07	0.1651	4.90021e-07	0.1651	4.06219e-07
0.16754	3.18359e-07	0.16754	4.93591e-07	0.16754	4.06799e-07
0.16998	3.20587e-07	0.16998	4.97009e-07	0.16998	4.08569e-07
0.17242	3.24097e-07	0.17242	5.00854e-07	0.17242	4.09454e-07
0.17487	3.2785e-07	0.17487	5.05493e-07	0.17487	4.11926e-07
0.17731	3.31482e-07	0.17731	5.09247e-07	0.17731	4.13147e-07
0.17975	3.34015e-07	0.17975	5.11932e-07	0.17975	4.1449e-07
0.18219	3.37616e-07	0.18219	5.15564e-07	0.18219	4.15466e-07
0.18463	3.40576e-07	0.18463	5.20355e-07	0.18463	4.1687e-07
0.18707	3.42621e-07	0.18707	5.23804e-07	0.18707	4.18762e-07
0.18951	3.46771e-07	0.18951	5.26611e-07	0.18951	4.19586e-07
0.19196	3.49792e-07	0.19196	5.2948e-07	0.19196	4.22455e-07
0.1944	3.5202e-07	0.1944	5.34332e-07	0.1944	4.22882e-07
0.19684	3.55438e-07	0.19684	5.38727e-07	0.19684	4.25507e-07
0.19928	3.58856e-07	0.19928	5.4184e-07	0.19928	4.27612e-07
0.20172	3.6145e-07	0.20172	5.44464e-07	0.20172	4.2868e-07
0.20416	3.65875e-07	0.20416	5.49683e-07	0.20416	4.29291e-07
0.2066	3.70911e-07	0.2066	5.51971e-07	0.2066	4.31274e-07
0.20905	3.74664e-07	0.20905	5.56671e-07	0.20905	4.33014e-07
0.21149	3.79517e-07	0.21149	5.60425e-07	0.21149	4.34143e-07
0.21393	3.83606e-07	0.21393	5.65796e-07	0.21393	4.36157e-07
0.21637	3.88824e-07	0.21637	5.68359e-07	0.21637	4.38568e-07
0.21881	3.92456e-07	0.21881	5.71869e-07	0.21881	4.38873e-07
0.22125	3.96454e-07	0.22125	5.77393e-07	0.22125	4.4101e-07
0.22369	4.0152e-07	0.22369	5.81665e-07	0.22369	4.42932e-07
0.22614	4.05945e-07	0.22614	5.8548e-07	0.22614	4.45129e-07
0.22858	4.08539e-07	0.22858	5.88928e-07	0.22858	4.45221e-07
0.23102	4.10919e-07	0.23102	5.93201e-07	0.23102	4.48517e-07
0.23346	4.15161e-07	0.23346	5.97198e-07	0.23346	4.50256e-07
0.2359	4.19556e-07	0.2359	6.02051e-07	0.2359	4.51111e-07
0.23834	4.20837e-07	0.23834	6.03943e-07	0.23834	4.54407e-07
0.24078	4.25842e-07	0.24078	6.09436e-07	0.24078	4.56238e-07
0.24323	4.28131e-07	0.24323	6.13403e-07	0.24323	4.56635e-07
0.24567	4.33594e-07	0.24567	6.1676e-07	0.24567	4.57977e-07
0.24811	4.37592e-07	0.24811	6.21033e-07	0.24811	4.60266e-07
0.25055	4.43298e-07	0.25055	6.25916e-07	0.25055	4.6228e-07
0.25299	4.48334e-07	0.25299	6.30798e-07	0.25299	4.63745e-07
0.25543	4.53156e-07	0.25543	6.36292e-07	0.25543	4.65729e-07
0.25787	4.58801e-07	0.25787	6.40564e-07	0.25787	4.68048e-07
0.26031	4.63409e-07	0.26031	6.43921e-07	0.26031	4.70306e-07
0.26276	4.6759e-07	0.26276	6.47888e-07	0.26276	4.72748e-07
0.2652	4.73541e-07	0.2652	6.53381e-07	0.2652	4.74121e-07
0.26764	4.7818e-07	0.26764	6.57654e-07	0.26764	4.7583e-07
0.27008	4.82635e-07	0.27008	6.62842e-07	0.27008	4.77722e-07
0.27252	4.87762e-07	0.27252	6.67419e-07	0.27252	4.80225e-07
0.27496	4.93713e-07	0.27496	6.71692e-07	0.27496	4.82788e-07
0.2774	4.98108e-07	0.2774	6.7627e-07	0.2774	4.84528e-07
0.27985	5.04486e-07	0.27985	6.81152e-07	0.27985	4.86328e-07
0.28229	5.10651e-07	0.28229	6.86646e-07	0.28229	4.88464e-07
0.28473	5.17303e-07	0.28473	6.90918e-07	0.28473	4.91119e-07
0.28717	5.23621e-07	0.28717	6.96411e-07	0.28717	4.92706e-07
0.28961	5.30701e-07	0.28961	6.98242e-07	0.28961	4.94873e-07
0.29205	5.35278e-07	0.29205	7.04956e-07	0.29205	4.9585e-07
0.29449	5.42847e-07	0.29449	7.10144e-07	0.29449	4.99603e-07
0.29694	5.49561e-07	0.29694	7.13501e-07	0.29694	5.01892e-07
0.29938	5.56793e-07	0.29938	7.20215e-07	0.29938	5.02899e-07
0.30182	5.63721e-07	0.30182	7.23877e-07	0.30182	5.06775e-07
0.30426	5.69946e-07	0.30426	7.30591e-07	0.30426	5.07477e-07
0.3067	5.77362e-07	0.3067	7.33643e-07	0.3067	5.11261e-07
0.30914	5.82947e-07	0.30914	7.38525e-07	0.30914	5.13306e-07
0.31158	5.88745e-07	0.31158	7.44324e-07	0.31158	5.1416e-07
0.31403	5.97076e-07	0.31403	7.47986e-07	0.31403	5.16876e-07
0.31647	6.02112e-07	0.31647	7.53479e-07	0.31647	5.20721e-07
0.31891	6.08521e-07	0.31891	7.58362e-07	0.31891	5.22583e-07
0.32135	6.1554e-07	0.32135	7.62024e-07	0.32135	5.242e-07
0.32379	6.22864e-07	0.32379	7.68127e-07	0.32379	5.27252e-07
0.32623	6.31104e-07	0.32623	7.71484e-07	0.32623	5.28748e-07
0.32867	6.38428e-07	0.32867	7.77588e-07	0.32867	5.31799e-07
0.33112	6.46057e-07	0.33112	7.82471e-07	0.33112	5.34363e-07
0.33356	6.55212e-07	0.33356	7.86438e-07	0.33356	5.36133e-07
0.336	6.61621e-07	0.336	7.91626e-07	0.336	5.37903e-07
0.33844	6.68945e-07	0.33844	7.96814e-07	0.33844	5.41168e-07
0.34088	6.7627e-07	0.34088	8.01392e-07	0.34088	5.43701e-07
0.34332	6.82068e-07	0.34332	8.05969e-07	0.34332	5.46753e-07
0.34576	6.88171e-07	0.34576	8.10547e-07	0.34576	5.48553e-07
0.34821	6.96411e-07	0.34821	8.15125e-07	0.34821	5.51971e-07
0.35065	7.04041e-07	0.35065	8.18176e-07	0.35065	5.53711e-07
0.35309	7.10144e-07	0.35309	8.22754e-07	0.35309	5.56213e-07
0.35553	7.18689e-07	0.35553	8.27332e-07	0.35553	5.59479e-07
0.35797	7.25098e-07	0.35797	8.31604e-07	0.35797	5.62347e-07
0.36041	7.33948e-07	0.36041	8.38013e-07	0.36041	5.64911e-07
0.36285	7.41577e-07	0.36285	8.41675e-07	0.36285	5.65033e-07
0.3653	7.50427e-07	0.3653	8.45337e-07	0.3653	5.70557e-07
0.36774	7.59277e-07	0.36774	8.51135e-07	0.36774	5.71808e-07
0.37018	7.68738e-07	0.37018	8.54492e-07	0.37018	5.74066e-07
0.37262	7.77588e-07	0.37262	8.58459e-07	0.37262	5.76843e-07
0.37506	7.85828e-07	0.37506	8.62427e-07	0.37506	5.79376e-07
0.3775	7.96204e-07	0.3775	8.6731e-07	0.3775	5.82977e-07
0.37994	8.05359e-07	0.37994	8.71887e-07	0.37994	5.86121e-07
0.38239	8.14819e-07	0.38239	8.75244e-07	0.38239	5.90118e-07
0.38483	8.23059e-07	0.38483	8.79211e-07	0.38483	5.91827e-07
0.38727	8.31299e-07	0.38727	8.83789e-07	0.38727	5.94666e-07
0.38971	8.38318e-07	0.38971	8.87756e-07	0.38971	5.98419e-07
0.39215	8.46558e-07	0.39215	8.90808e-07	0.39215	6.00311e-07
0.39459	8.55103e-07	0.39459	8.94775e-07	0.39459	6.03027e-07
0.39703	8.62427e-07	0.39703	8.99963e-07	0.39703	6.05774e-07
0.39948	8.69141e-07	0.39948	9.03625e-07	0.39948	6.09436e-07
0.40192	8.77075e-07	0.40192	9.07898e-07	0.40192	6.11877e-07
0.40436	8.84094e-07	0.40436	9.11255e-07	0.40436	6.14319e-07
0.4068	8.92639e-07	0.4068	9.15222e-07	0.4068	6.17065e-07
0.40924	9.01794e-07	0.40924	9.18274e-07	0.40924	6.20117e-07
0.41168	9.10645e-07	0.41168	9.23462e-07	0.41168	6.24084e-07
0.41412	9.19189e-07	0.41412	9.25598e-07	0.41412	6.26831e-07
0.41656	9.30176e-07	0.41656	9.31396e-07	0.41656	6.29578e-07
0.41901	9.40552e-07	0.41901	9.32312e-07	0.41901	6.32935e-07
0.42145	9.50623e-07	0.42145	9.375e-07	0.42145	6.35376e-07
0.42389	9.60693e-07	0.42389	9.42078e-07	0.42389	6.39648e-07
0.42633	9.7168e-07	0.42633	9.45435e-07	0.42633	6.43921e-07
0.42877	9.79004e-07	0.42877	9.47876e-07	0.42877	6.46973e-07
0.43121	9.8938e-07	0.43121	9.52759e-07	0.43121	6.5033e-07
0.43365	9.96704e-07	0.43365	9.552e-07	0.43365	6.53687e-07
0.4361	1.00769e-06	0.4361	9.58557e-07	0.4361	6.57959e-07
0.43854	1.01501e-06	0.43854	9.63745e-07	0.43854	6.58569e-07
0.44098	1.02631e-06	0.44098	9.66492e-07	0.44098	6.64063e-07
0.44342	1.03333e-06	0.44342	9.70459e-07	0.44342	6.65283e-07
0.44586	1.04401e-06	0.44586	9.73511e-07	0.44586	6.69861e-07
0.4483	1.05286e-06	0.4483	9.77478e-07	0.4483	6.72913e-07
0.45074	1.0614e-06	0.45074	9.8053e-07	0.45074	6.78101e-07
0.45319	1.07117e-06	0.45319	9.83276e-07	0.45319	6.79321e-07
0.45563	1.08093e-06	0.45563	9.88464e-07	0.45563	6.83289e-07
0.45807	1.09009e-06	0.45807	9.90906e-07	0.45807	6.87256e-07
0.46051	1.10016e-06	0.46051	9.95178e-07	0.46051	6.92749e-07
0.46295	1.1087e-06	0.46295	9.9823e-07	0.46295	6.95496e-07
0.46539	1.11938e-06	0.46539	1.00159e-06	0.46539	6.99463e-07
0.46783	1.12793e-06	0.46783	1.00555e-06	0.46783	7.02515e-07
0.47028	1.13953e-06	0.47028	1.00891e-06	0.47028	7.06482e-07
0.47272	1.14807e-06	0.47272	1.01166e-06	0.47272	7.09534e-07
0.47516	1.15814e-06	0.47516	1.01288e-06	0.47516	7.14111e-07
0.4776	1.16821e-06	0.4776	1.01807e-06	0.4776	7.17163e-07
0.48004	1.1795e-06	0.48004	1.02173e-06	0.48004	7.22961e-07
0.48248	1.18988e-06	0.48248	1.02325e-06	0.48248	7.23877e-07
0.48492	1.20087e-06	0.48492	1.02936e-06	0.48492	7.2876e-07
0.48737	1.20941e-06	0.48737	1.03271e-06	0.48737	7.33948e-07
0.48981	1.22101e-06	0.48981	1.03455e-06	0.48981	7.37e-07
0.49225	1.2323e-06	0.49225	1.03882e-06	0.49225	7.40662e-07
0.49469	1.24359e-06	0.49469	1.04126e-06	0.49469	7.4707e-07
0.49713	1.25427e-06	0.49713	1.04553e-06	0.49713	7.48901e-07
0.49957	1.26465e-06	0.49957	1.0495e-06	0.49957	7.547e-07
0.50201	1.27289e-06	0.50201	1.05225e-06	0.50201	7.58362e-07
0.50446	1.28632e-06	0.50446	1.05621e-06	0.50446	7.6355e-07
0.5069	1.29761e-06	0.5069	1.05957e-06	0.5069	7.67212e-07
0.50934	1.30768e-06	0.50934	1.06415e-06	0.50934	7.724e-07
0.51178	1.31927e-06	0.51178	1.06628e-06	0.51178	7.77588e-07
0.51422	1.32935e-06	0.51422	1.06934e-06	0.51422	7.81555e-07
0.51666	1.34216e-06	0.51666	1.07422e-06	0.51666	7.86743e-07
0.5191	1.35498e-06	0.5191	1.07819e-06	0.5191	7.901e-07
0.52155	1.36627e-06	0.52155	1.08093e-06	0.52155	7.95593e-07
0.52399	1.37909e-06	0.52399	1.08551e-06	0.52399	8.00476e-07
0.52643	1.39313e-06	0.52643	1.08917e-06	0.52643	8.05664e-07
0.52887	1.40594e-06	0.52887	1.09283e-06	0.52887	8.10242e-07
0.53131	1.41663e-06	0.53131	1.0965e-06	0.53131	8.14514e-07
0.53375	1.42944e-06	0.53375	1.09924e-06	0.53375	8.20313e-07
0.53619	1.44379e-06	0.53619	1.10321e-06	0.53619	8.25806e-07
0.53864	1.45813e-06	0.53864	1.10809e-06	0.53864	8.30383e-07
0.54108	1.47186e-06	0.54108	1.11053e-06	0.54108	8.35876e-07
0.54352	1.48254e-06	0.54352	1.11481e-06	0.54352	8.41064e-07
0.54596	1.49353e-06	0.54596	1.11938e-06	0.54596	8.46252e-07
0.5484	1.50391e-06	0.5484	1.12305e-06	0.5484	8.52661e-07
0.55084	1.5152e-06	0.55084	1.12701e-06	0.55084	8.58154e-07
0.55328	1.52954e-06	0.55328	1.13068e-06	0.55328	8.63647e-07
0.55573	1.54266e-06	0.55573	1.13525e-06	0.55573	8.6853e-07
0.55817	1.55518e-06	0.55817	1.13922e-06	0.55817	8.74329e-07
0.56061	1.56799e-06	0.56061	1.14227e-06	0.56061	8.79822e-07
0.56305	1.58173e-06	0.56305	1.14655e-06	0.56305	8.8562e-07
0.56549	1.59576e-06	0.56549	1.15112e-06	0.56549	8.91724e-07
0.56793	1.61072e-06	0.56793	1.15601e-06	0.56793	8.98743e-07
0.57037	1.62506e-06	0.57037	1.15936e-06	0.57037	9.021e-07
0.57281	1.63757e-06	0.57281	1.16394e-06	0.57281	9.10339e-07
0.57526	1.651e-06	0.57526	1.16852e-06	0.57526	9.16138e-07
0.5777	1.66534e-06	0.5777	1.17218e-06	0.5777	9.23462e-07
0.58014	1.67847e-06	0.58014	1.17645e-06	0.58014	9.2804e-07
0.58258	1.69312e-06	0.58258	1.18103e-06	0.58258	9.35059e-07
0.58502	1.70471e-06	0.58502	1.18408e-06	0.58502	9.40857e-07
0.58746	1.71936e-06	0.58746	1.18866e-06	0.58746	9.47266e-07
0.5899	1.73157e-06	0.5899	1.19202e-06	0.5899	9.552e-07
0.59235	1.74591e-06	0.59235	1.19843e-06	0.59235	9.59473e-07
0.59479	1.75812e-06	0.59479	1.20178e-06	0.59479	9.67712e-07
0.59723	1.77216e-06	0.59723	1.20544e-06	0.59723	9.75342e-07
0.59967	1.7865e-06	0.59967	1.21124e-06	0.59967	9.8175e-07
0.60211	1.80145e-06	0.60211	1.21674e-06	0.60211	9.89075e-07
0.60455	1.81549e-06	0.60455	1.2207e-06	0.60455	9.94873e-07
0.60699	1.83044e-06	0.60699	1.2262e-06	0.60699	1.00281e-06
0.60944	1.84387e-06	0.60944	1.22925e-06	0.60944	1.00922e-06
0.61188	1.85913e-06	0.61188	1.23352e-06	0.61188	1.01807e-06
0.61432	1.87378e-06	0.61432	1.23901e-06	0.61432	1.02478e-06
0.61676	1.88965e-06	0.61676	1.24329e-06	0.61676	1.03271e-06
0.6192	1.90247e-06	0.6192	1.24817e-06	0.6192	1.04034e-06
0.62164	1.92017e-06	0.62164	1.25092e-06	0.62164	1.04736e-06
0.62408	1.93268e-06	0.62408	1.25671e-06	0.62408	1.0553e-06
0.62653	1.94855e-06	0.62653	1.2616e-06	0.62653	1.06323e-06
0.62897	1.96442e-06	0.62897	1.26678e-06	0.62897	1.07086e-06
0.63141	1.97876e-06	0.63141	1.27106e-06	0.63141	1.07849e-06
0.63385	1.99524e-06	0.63385	1.27563e-06	0.63385	1.08582e-06
0.63629	2.00989e-06	0.63629	1.28235e-06	0.63629	1.09528e-06
0.63873	2.02576e-06	0.63873	1.28632e-06	0.63873	1.10291e-06
0.64117	2.03918e-06	0.64117	1.29242e-06	0.64117	1.11115e-06
0.64362	2.05475e-06	0.64362	1.297e-06	0.64362	1.11908e-06
0.64606	2.0694e-06	0.64606	1.30341e-06	0.64606	1.12762e-06
0.6485	2.08496e-06	0.6485	1.30981e-06	0.6485	1.13495e-06
0.65094	2.10083e-06	0.65094	1.31409e-06	0.65094	1.14655e-06
0.65338	2.11456e-06	0.65338	1.31958e-06	0.65338	1.15509e-06
0.65582	2.13074e-06	0.65582	1.32629e-06	0.65582	1.16241e-06
0.65826	2.14783e-06	0.65826	1.33087e-06	0.65826	1.17279e-06
0.66071	2.16431e-06	0.66071	1.33667e-06	0.66071	1.18103e-06
0.66315	2.18109e-06	0.66315	1.34155e-06	0.66315	1.18744e-06
0.66559	2.19604e-06	0.66559	1.34857e-06	0.66559	1.19904e-06
0.66803	2.21069e-06	0.66803	1.35345e-06	0.66803	1.20605e-06
0.67047	2.22565e-06	0.67047	1.36078e-06	0.67047	1.21765e-06
0.67291	2.24182e-06	0.67291	1.3681e-06	0.67291	1.22742e-06
0.67535	2.25861e-06	0.67535	1.37451e-06	0.67535	1.23779e-06
0.6778	2.27356e-06	0.6778	1.37878e-06	0.6778	1.24695e-06
0.68024	2.29218e-06	0.68024	1.38428e-06	0.68024	1.25641e-06
0.68268	2.30804e-06	0.68268	1.39038e-06	0.68268	1.26495e-06
0.68512	2.32391e-06	0.68512	1.39771e-06	0.68512	1.27686e-06
0.68756	2.33887e-06	0.68756	1.40411e-06	0.68756	1.28754e-06
0.69	2.35382e-06	0.69	1.41144e-06	0.69	1.29822e-06
0.69244	2.36786e-06	0.69244	1.41785e-06	0.69244	1.30798e-06
0.69489	2.38434e-06	0.69489	1.42517e-06	0.69489	1.31897e-06
0.69733	2.40082e-06	0.69733	1.43219e-06	0.69733	1.32782e-06
0.69977	2.41669e-06	0.69977	1.43982e-06	0.69977	1.33942e-06
0.70221	2.43195e-06	0.70221	1.44531e-06	0.70221	1.3501e-06
0.70465	2.45087e-06	0.70465	1.45416e-06	0.70465	1.36108e-06
0.70709	2.46613e-06	0.70709	1.45996e-06	0.70709	1.37421e-06
0.70953	2.48291e-06	0.70953	1.46912e-06	0.70953	1.38275e-06
0.71198	2.49756e-06	0.71198	1.47736e-06	0.71198	1.39435e-06
0.71442	2.51373e-06	0.71442	1.48438e-06	0.71442	1.40564e-06
0.71686	2.5296e-06	0.71686	1.49231e-06	0.71686	1.41754e-06
0.7193	2.54608e-06	0.7193	1.50116e-06	0.7193	1.42822e-06
0.72174	2.56195e-06	0.72174	1.5094e-06	0.72174	1.44287e-06
0.72418	2.57874e-06	0.72418	1.51703e-06	0.72418	1.45294e-06
0.72662	2.59491e-06	0.72662	1.52649e-06	0.72662	1.46423e-06
0.72906	2.612e-06	0.72906	1.53473e-06	0.72906	1.47522e-06
0.73151	2.62665e-06	0.73151	1.54449e-06	0.73151	1.49048e-06
0.73395	2.64343e-06	0.73395	1.55212e-06	0.73395	1.50085e-06
0.73639	2.65686e-06	0.73639	1.56219e-06	0.73639	1.51276e-06
0.73883	2.67395e-06	0.73883	1.57166e-06	0.73883	1.5274e-06
0.74127	2.68799e-06	0.74127	1.5799e-06	0.74127	1.53961e-06
0.74371	2.70294e-06	0.74371	1.58813e-06	0.74371	1.55151e-06
0.74615	2.71729e-06	0.74615	1.59973e-06	0.74615	1.56647e-06
0.7486	2.73224e-06	0.7486	1.60767e-06	0.7486	1.5799e-06
0.75104	2.74628e-06	0.75104	1.61743e-06	0.75104	1.59363e-06
0.75348	2.76367e-06	0.75348	1.62872e-06	0.75348	1.60797e-06
0.75592	2.78015e-06	0.75592	1.63757e-06	0.75592	1.62201e-06
0.75836	2.7948e-06	0.75836	1.64764e-06	0.75836	1.63605e-06
0.7608	2.81006e-06	0.7608	1.6571e-06	0.7608	1.6507e-06
0.76324	2.82562e-06	0.76324	1.66748e-06	0.76324	1.66687e-06
0.76569	2.8418e-06	0.76569	1.67633e-06	0.76569	1.67816e-06
0.76813	2.85553e-06	0.76813	1.68701e-06	0.76813	1.69586e-06
0.77057	2.86957e-06	0.77057	1.69952e-06	0.77057	1.70929e-06
0.77301	2.88452e-06	0.77301	1.71112e-06	0.77301	1.72577e-06
0.77545	2.89795e-06	0.77545	1.72028e-06	0.77545	1.74133e-06
0.77789	2.91107e-06	0.77789	1.73187e-06	0.77789	1.7569e-06
0.78033	2.92358e-06	0.78033	1.74316e-06	0.78033	1.77185e-06
0.78278	2.93732e-06	0.78278	1.75385e-06	0.78278	1.78833e-06
0.78522	2.94952e-06	0.78522	1.76544e-06	0.78522	1.8045e-06
0.78766	2.96356e-06	0.78766	1.77704e-06	0.78766	1.8219e-06
0.7901	2.97577e-06	0.7901	1.78833e-06	0.7901	1.83899e-06
0.79254	2.9895e-06	0.79254	1.79993e-06	0.79254	1.85608e-06
0.79498	2.99835e-06	0.79498	1.81122e-06	0.79498	1.87103e-06
0.79742	3.01056e-06	0.79742	1.82281e-06	0.79742	1.88965e-06
0.79987	3.02063e-06	0.79987	1.83472e-06	0.79987	1.90674e-06
0.80231	3.03223e-06	0.80231	1.84814e-06	0.80231	1.92627e-06
0.80475	3.04138e-06	0.80475	1.85852e-06	0.80475	1.94061e-06
0.80719	3.05176e-06	0.80719	1.87195e-06	0.80719	1.95923e-06
0.80963	3.06427e-06	0.80963	1.88721e-06	0.80963	1.97662e-06
0.81207	3.07587e-06	0.81207	1.8988e-06	0.81207	1.99738e-06
0.81451	3.08533e-06	0.81451	1.9104e-06	0.81451	2.01385e-06
0.81696	3.09631e-06	0.81696	1.92566e-06	0.81696	2.03217e-06
0.8194	3.10577e-06	0.8194	1.93665e-06	0.8194	2.05139e-06
0.82184	3.11462e-06	0.82184	1.95068e-06	0.82184	2.07031e-06
0.82428	3.12317e-06	0.82428	1.9635e-06	0.82428	2.08984e-06
0.82672	3.1308e-06	0.82672	1.97754e-06	0.82672	2.10815e-06
0.82916	3.13812e-06	0.82916	1.98914e-06	0.82916	2.12646e-06
0.8316	3.14636e-06	0.8316	2.00592e-06	0.8316	2.14752e-06
0.83405	3.15186e-06	0.83405	2.01935e-06	0.83405	2.16644e-06
0.83649	3.15826e-06	0.83649	2.03339e-06	0.83649	2.18964e-06
0.83893	3.16345e-06	0.83893	2.0462e-06	0.83893	2.20642e-06
0.84137	3.17108e-06	0.84137	2.06177e-06	0.84137	2.22839e-06
0.84381	3.17505e-06	0.84381	2.0752e-06	0.84381	2.24945e-06
0.84625	3.17993e-06	0.84625	2.08984e-06	0.84625	2.26807e-06
0.84869	3.18451e-06	0.84869	2.10419e-06	0.84869	2.28973e-06
0.85114	3.18909e-06	0.85114	2.12036e-06	0.85114	2.31323e-06
0.85358	3.19458e-06	0.85358	2.13348e-06	0.85358	2.33337e-06
0.85602	3.20007e-06	0.85602	2.14966e-06	0.85602	2.35565e-06
0.85846	3.20221e-06	0.85846	2.164e-06	0.85846	2.3761e-06
0.8609	3.20404e-06	0.8609	2.17804e-06	0.8609	2.39899e-06
0.86334	3.20648e-06	0.86334	2.19299e-06	0.86334	2.41913e-06
0.86578	3.20984e-06	0.86578	2.20978e-06	0.86578	2.44202e-06
0.86823	3.21014e-06	0.86823	2.22504e-06	0.86823	2.46307e-06
0.87067	3.21228e-06	0.87067	2.24213e-06	0.87067	2.48749e-06
0.87311	3.21289e-06	0.87311	2.25586e-06	0.87311	2.50824e-06
0.87555	3.21442e-06	0.87555	2.27203e-06	0.87555	2.53296e-06
0.87799	3.21503e-06	0.87799	2.28729e-06	0.87799	2.55463e-06
0.88043	3.21533e-06	0.88043	2.30255e-06	0.88043	2.57996e-06
0.88287	3.21442e-06	0.88287	2.31903e-06	0.88287	2.60101e-06
0.88531	3.21381e-06	0.88531	2.33673e-06	0.88531	2.62421e-06
0.88776	3.21411e-06	0.88776	2.35138e-06	0.88776	2.64648e-06
0.8902	3.2132e-06	0.8902	2.36938e-06	0.8902	2.67303e-06
0.89264	3.21259e-06	0.89264	2.38525e-06	0.89264	2.69501e-06
0.89508	3.2132e-06	0.89508	2.40326e-06	0.89508	2.71973e-06
0.89752	3.2132e-06	0.89752	2.41791e-06	0.89752	2.74231e-06
0.89996	3.21228e-06	0.89996	2.43713e-06	0.89996	2.76855e-06
0.9024	3.21075e-06	0.9024	2.45239e-06	0.9024	2.79266e-06
0.90485	3.20984e-06	0.90485	2.47009e-06	0.90485	2.8183e-06
0.90729	3.20801e-06	0.90729	2.48627e-06	0.90729	2.84485e-06
0.90973	3.20587e-06	0.90973	2.50336e-06	0.90973	2.87048e-06
0.91217	3.20343e-06	0.91217	2.52045e-06	0.91217	2.89337e-06
0.91461	3.20282e-06	0.91461	2.53998e-06	0.91461	2.92145e-06
0.91705	3.20038e-06	0.91705	2.55646e-06	0.91705	2.94525e-06
0.91949	3.19763e-06	0.91949	2.5766e-06	0.91949	2.97241e-06
0.92194	3.19336e-06	0.92194	2.59186e-06	0.92194	2.99866e-06
0.92438	3.19031e-06	0.92438	2.6123e-06	0.92438	3.0249e-06
0.92682	3.18665e-06	0.92682	2.63092e-06	0.92682	3.05359e-06
0.92926	3.18512e-06	0.92926	2.65045e-06	0.92926	3.08075e-06
0.9317	3.17871e-06	0.9317	2.66815e-06	0.9317	3.10638e-06
0.93414	3.17749e-06	0.93414	2.6889e-06	0.93414	3.13599e-06
0.93658	3.17535e-06	0.93658	2.7063e-06	0.93658	3.15948e-06
0.93903	3.17413e-06	0.93903	2.72705e-06	0.93903	3.19e-06
0.94147	3.17078e-06	0.94147	2.74506e-06	0.94147	3.21625e-06
0.94391	3.16986e-06	0.94391	2.76031e-06	0.94391	3.24646e-06
0.94635	3.16742e-06	0.94635	2.77924e-06	0.94635	3.27423e-06
0.94879	3.16437e-06	0.94879	2.79938e-06	0.94879	3.30475e-06
0.95123	3.16498e-06	0.95123	2.81647e-06	0.95123	3.33282e-06
0.95367	3.16162e-06	0.95367	2.83386e-06	0.95367	3.36456e-06
0.95612	3.16071e-06	0.95612	2.85156e-06	0.95612	3.39294e-06
0.95856	3.15857e-06	0.95856	2.8714e-06	0.95856	3.42346e-06
0.961	3.15704e-06	0.961	2.88849e-06	0.961	3.45123e-06
0.96344	3.15674e-06	0.96344	2.9071e-06	0.96344	3.48114e-06
0.96588	3.1546e-06	0.96588	2.92664e-06	0.96588	3.51135e-06
0.96832	3.15216e-06	0.96832	2.94769e-06	0.96832	3.54523e-06
0.97076	3.15125e-06	0.97076	2.96448e-06	0.97076	3.57544e-06
0.97321	3.1488e-06	0.97321	2.98645e-06	0.97321	3.6084e-06
0.97565	3.14514e-06	0.97565	3.00293e-06	0.97565	3.64014e-06
0.97809	3.14514e-06	0.97809	3.02185e-06	0.97809	3.67004e-06
0.98053	3.1424e-06	0.98053	3.03955e-06	0.98053	3.703e-06
0.98297	3.14209e-06	0.98297	3.05695e-06	0.98297	3.73505e-06
0.98541	3.14178e-06	0.98541	3.07709e-06	0.98541	3.76862e-06
0.98785	3.13965e-06	0.98785	3.09723e-06	0.98785	3.80493e-06
0.9903	3.13934e-06	0.9903	3.11615e-06	0.9903	3.83484e-06
0.99274	3.13721e-06	0.99274	3.1369e-06	0.99274	3.87238e-06
0.99518	3.13538e-06	0.99518	3.15491e-06	0.99518	3.90442e-06
0.99762	3.1366e-06	0.99762	3.17444e-06	0.99762	3.94165e-06
1.00006	3.13751e-06	1.00006	3.19183e-06	1.00006	3.97522e-06
1.0025	3.13446e-06	1.0025	3.21136e-06	1.0025	4.01123e-06
1.00494	3.13416e-06	1.00494	3.23181e-06	1.00494	4.04724e-06
1.00739	3.13019e-06	1.00739	3.25287e-06	1.00739	4.08691e-06
1.00983	3.12714e-06	1.00983	3.27087e-06	1.00983	4.12048e-06
1.01227	3.12347e-06	1.01227	3.29163e-06	1.01227	4.15955e-06
1.01471	3.12012e-06	1.01471	3.30963e-06	1.01471	4.19617e-06
1.01715	3.12134e-06	1.01715	3.3313e-06	1.01715	4.2334e-06
1.01959	3.11768e-06	1.01959	3.34839e-06	1.01959	4.27155e-06
1.02203	3.11646e-06	1.02203	3.36792e-06	1.02203	4.31091e-06
1.02448	3.11737e-06	1.02448	3.38715e-06	1.02448	4.34753e-06
1.02692	3.11829e-06	1.02692	3.40942e-06	1.02692	4.38995e-06
1.02936	3.11737e-06	1.02936	3.42896e-06	1.02936	4.42993e-06
1.0318	3.12103e-06	1.0318	3.4491e-06	1.0318	4.47418e-06
1.03424	3.12225e-06	1.03424	3.46954e-06	1.03424	4.51172e-06
1.03668	3.12531e-06	1.03668	3.4906e-06	1.03668	4.55505e-06
1.03912	3.12714e-06	1.03912	3.50891e-06	1.03912	4.59717e-06
1.04156	3.12897e-06	1.04156	3.52875e-06	1.04156	4.63867e-06
1.04401	3.12897e-06	1.04401	3.54889e-06	1.04401	4.68292e-06
1.04645	3.13171e-06	1.04645	3.57117e-06	1.04645	4.73022e-06
1.04889	3.13385e-06	1.04889	3.58917e-06	1.04889	4.77173e-06
1.05133	3.13934e-06	1.05133	3.61084e-06	1.05133	4.82025e-06
1.05377	3.14087e-06	1.05377	3.62854e-06	1.05377	4.86145e-06
1.05621	3.14423e-06	1.05621	3.65082e-06	1.05621	4.91089e-06
1.05865	3.14636e-06	1.05865	3.66852e-06	1.05865	4.95667e-06
1.0611	3.14728e-06	1.0611	3.69171e-06	1.0611	5.00427e-06
1.06354	3.14911e-06	1.06354	3.71063e-06	1.06354	5.05096e-06
1.06598	3.15186e-06	1.06598	3.73474e-06	1.06598	5.10498e-06
1.06842	3.15308e-06	1.06842	3.75366e-06	1.06842	5.14954e-06
1.07086	3.15735e-06	1.07086	3.77563e-06	1.07086	5.19958e-06
1.0733	3.15887e-06	1.0733	3.79669e-06	1.0733	5.24933e-06
1.07574	3.1604e-06	1.07574	3.81989e-06	1.07574	5.30151e-06
1.07819	3.16101e-06	1.07819	3.83972e-06	1.07819	5.35156e-06
1.08063	3.16254e-06	1.08063	3.86139e-06	1.08063	5.40344e-06
1.08307	3.16467e-06	1.08307	3.88214e-06	1.08307	5.45532e-06
1.08551	3.16681e-06	1.08551	3.90625e-06	1.08551	5.50934e-06
1.08795	3.17108e-06	1.08795	3.92883e-06	1.08795	5.56244e-06
1.09039	3.1778e-06	1.09039	3.95203e-06	1.09039	5.61737e-06
1.09283	3.18237e-06	1.09283	3.974e-06	1.09283	5.66925e-06
1.09528	3.18848e-06	1.09528	3.99719e-06	1.09528	5.7254e-06
1.09772	3.19366e-06	1.09772	4.01947e-06	1.09772	5.78094e-06
1.10016	3.20129e-06	1.10016	4.04236e-06	1.10016	5.83832e-06
1.1026	3.20831e-06	1.1026	4.06769e-06	1.1026	5.89417e-06
1.10504	3.21533e-06	1.10504	4.09241e-06	1.10504	5.95245e-06
1.10748	3.2196e-06	1.10748	4.11469e-06	1.10748	6.00769e-06
1.10992	3.22693e-06	1.10992	4.1391e-06	1.10992	6.073e-06
1.11237	3.23212e-06	1.11237	4.16138e-06	1.11237	6.12793e-06
1.11481	3.2373e-06	1.11481	4.1864e-06	1.11481	6.18896e-06
1.11725	3.24371e-06	1.11725	4.20929e-06	1.11725	6.24695e-06
1.11969	3.25012e-06	1.11969	4.23401e-06	1.11969	6.30798e-06
1.12213	3.25378e-06	1.12213	4.25781e-06	1.12213	6.36597e-06
1.12457	3.26141e-06	1.12457	4.28528e-06	1.12457	6.427e-06
1.12701	3.26752e-06	1.12701	4.30847e-06	1.12701	6.48804e-06
1.12946	3.27332e-06	1.12946	4.33411e-06	1.12946	6.55212e-06
1.1319	3.27698e-06	1.1319	4.35852e-06	1.1319	6.61316e-06
1.13434	3.28094e-06	1.13434	4.38507e-06	1.13434	6.67725e-06
1.13678	3.28827e-06	1.13678	4.4104e-06	1.13678	6.74133e-06
1.13922	3.29346e-06	1.13922	4.43604e-06	1.13922	6.80237e-06
1.14166	3.30078e-06	1.14166	4.46167e-06	1.14166	6.86646e-06
1.1441	3.30994e-06	1.1441	4.49066e-06	1.1441	6.93359e-06
1.14655	3.31726e-06	1.14655	4.5163e-06	1.14655	6.99463e-06
1.14899	3.33008e-06	1.14899	4.54437e-06	1.14899	7.06177e-06
1.15143	3.33923e-06	1.15143	4.57092e-06	1.15143	7.12585e-06
1.15387	3.34961e-06	1.15387	4.60175e-06	1.15387	7.19604e-06
1.15631	3.35754e-06	1.15631	4.6286e-06	1.15631	7.25708e-06
1.15875	3.36334e-06	1.15875	4.65698e-06	1.15875	7.32422e-06
1.16119	3.3728e-06	1.16119	4.6875e-06	1.16119	7.39136e-06
1.16364	3.38348e-06	1.16364	4.7171e-06	1.16364	7.46155e-06
1.16608	3.38989e-06	1.16608	4.74396e-06	1.16608	7.52869e-06
1.16852	3.39722e-06	1.16852	4.77661e-06	1.16852	7.59888e-06
1.17096	3.40851e-06	1.17096	4.80591e-06	1.17096	7.66602e-06
1.1734	3.41827e-06	1.1734	4.83795e-06	1.1734	7.73621e-06
1.17584	3.42712e-06	1.17584	4.86816e-06	1.17584	7.80334e-06
1.17828	3.43506e-06	1.17828	4.90021e-06	1.17828	7.87354e-06
1.18073	3.44635e-06	1.18073	4.93225e-06	1.18073	7.94373e-06
1.18317	3.45673e-06	1.18317	4.96552e-06	1.18317	8.01697e-06
1.18561	3.46832e-06	1.18561	4.99939e-06	1.18561	8.08411e-06
1.18805	3.48267e-06	1.18805	5.03082e-06	1.18805	8.15735e-06
1.19049	3.49396e-06	1.19049	5.06439e-06	1.19049	8.22754e-06
1.19293	3.50861e-06	1.19293	5.09796e-06	1.19293	8.30078e-06
1.19537	3.52112e-06	1.19537	5.13245e-06	1.19537	8.37097e-06
1.19781	3.53394e-06	1.19781	5.16571e-06	1.19781	8.44421e-06
1.20026	3.54736e-06	1.20026	5.20172e-06	1.20026	8.51746e-06
1.2027	3.55957e-06	1.2027	5.23895e-06	1.2027	8.59375e-06
1.20514	3.5733e-06	1.20514	5.27374e-06	1.20514	8.66394e-06
1.20758	3.58704e-06	1.20758	5.31158e-06	1.20758	8.74023e-06
1.21002	3.59985e-06	1.21002	5.34698e-06	1.21002	8.81348e-06
1.21246	3.61359e-06	1.21246	5.38422e-06	1.21246	8.88977e-06
1.2149	3.62793e-06	1.2149	5.42023e-06	1.2149	8.96301e-06
1.21735	3.6441e-06	1.21735	5.4599e-06	1.21735	9.03931e-06
1.21979	3.65967e-06	1.21979	5.49774e-06	1.21979	9.1156e-06
1.22223	3.67584e-06	1.22223	5.5365e-06	1.22223	9.19495e-06
1.22467	3.69049e-06	1.22467	5.57526e-06	1.22467	9.27124e-06
1.22711	3.70911e-06	1.22711	5.61646e-06	1.22711	9.35059e-06
1.22955	3.72437e-06	1.22955	5.65491e-06	1.22955	9.42688e-06
1.23199	3.74329e-06	1.23199	5.69641e-06	1.23199	9.50928e-06
1.23444	3.7616e-06	1.23444	5.73608e-06	1.23444	9.58557e-06
1.23688	3.77869e-06	1.23688	5.7782e-06	1.23688	9.66797e-06
1.23932	3.79791e-06	1.23932	5.81787e-06	1.23932	9.74731e-06
1.24176	3.81683e-06	1.24176	5.86273e-06	1.24176	9.82971e-06
1.2442	3.83453e-06	1.2442	5.9024e-06	1.2442	9.90601e-06
1.24664	3.85223e-06	1.24664	5.94604e-06	1.24664	9.99146e-06
1.24908	3.86932e-06	1.24908	5.98816e-06	1.24908	1.00739e-05
1.25153	3.88763e-06	1.25153	6.03333e-06	1.25153	1.01532e-05
1.25397	3.90686e-06	1.25397	6.07605e-06	1.25397	1.02325e-05
1.25641	3.92639e-06	1.25641	6.12183e-06	1.25641	1.03149e-05
1.25885	3.94623e-06	1.25885	6.1676e-06	1.25885	1.04004e-05
1.26129	3.96698e-06	1.26129	6.21338e-06	1.26129	1.04858e-05
1.26373	3.98651e-06	1.26373	6.25916e-06	1.26373	1.05713e-05
1.26617	4.0094e-06	1.26617	6.30493e-06	1.26617	1.06598e-05
1.26862	4.02863e-06	1.26862	6.35071e-06	1.26862	1.07422e-05
1.27106	4.05273e-06	1.27106	6.39954e-06	1.27106	1.08307e-05
1.2735	4.07379e-06	1.2735	6.44836e-06	1.2735	1.09131e-05
1.27594	4.09851e-06	1.27594	6.49414e-06	1.27594	1.10016e-05
1.27838	4.12018e-06	1.27838	6.54297e-06	1.27838	1.10901e-05
1.28082	4.14581e-06	1.28082	6.5918e-06	1.28082	1.11816e-05
1.28326	4.16901e-06	1.28326	6.64063e-06	1.28326	1.12701e-05
1.28571	4.19617e-06	1.28571	6.6925e-06	1.28571	1.13586e-05
1.28815	4.22363e-06	1.28815	6.74133e-06	1.28815	1.14502e-05
1.29059	4.24713e-06	1.29059	6.79321e-06	1.29059	1.15417e-05
1.29303	4.27246e-06	1.29303	6.84204e-06	1.29303	1.16302e-05
1.29547	4.29871e-06	1.29547	6.89392e-06	1.29547	1.17188e-05
1.29791	4.32404e-06	1.29791	6.9458e-06	1.29791	1.18103e-05
1.30035	4.3515e-06	1.30035	7.00073e-06	1.30035	1.19049e-05
1.3028	4.37866e-06	1.3028	7.05261e-06	1.3028	1.19934e-05
1.30524	4.40674e-06	1.30524	7.10449e-06	1.30524	1.20911e-05
1.30768	4.43451e-06	1.30768	7.15942e-06	1.30768	1.21826e-05
1.31012	4.46381e-06	1.31012	7.21436e-06	1.31012	1.22803e-05
1.31256	4.49127e-06	1.31256	7.26624e-06	1.31256	1.23718e-05
1.315	4.51874e-06	1.315	7.32117e-06	1.315	1.24664e-05
1.31744	4.54803e-06	1.31744	7.37915e-06	1.31744	1.25641e-05
1.31989	4.57916e-06	1.31989	7.43713e-06	1.31989	1.26648e-05
1.32233	4.60602e-06	1.32233	7.49207e-06	1.32233	1.27594e-05
1.32477	4.6344e-06	1.32477	7.55005e-06	1.32477	1.28601e-05
1.32721	4.66339e-06	1.32721	7.60498e-06	1.32721	1.29578e-05
1.32965	4.69574e-06	1.32965	7.66602e-06	1.32965	1.30615e-05
1.33209	4.72504e-06	1.33209	7.724e-06	1.33209	1.31622e-05
1.33453	4.75861e-06	1.33453	7.78198e-06	1.33453	1.32629e-05
1.33698	4.78973e-06	1.33698	7.83997e-06	1.33698	1.33636e-05
1.33942	4.82574e-06	1.33942	7.901e-06	1.33942	1.34705e-05
1.34186	4.85748e-06	1.34186	7.95898e-06	1.34186	1.35742e-05
1.3443	4.89288e-06	1.3443	8.02307e-06	1.3443	1.3681e-05
1.34674	4.92401e-06	1.34674	8.08411e-06	1.34674	1.37848e-05
1.34918	4.96063e-06	1.34918	8.14819e-06	1.34918	1.38947e-05
1.35162	4.99023e-06	1.35162	8.20618e-06	1.35162	1.39954e-05
1.35406	5.02472e-06	1.35406	8.27026e-06	1.35406	1.41022e-05
1.35651	5.05798e-06	1.35651	8.33435e-06	1.35651	1.4212e-05
1.35895	5.0943e-06	1.35895	8.39844e-06	1.35895	1.43219e-05
1.36139	5.12756e-06	1.36139	8.46252e-06	1.36139	1.44257e-05
1.36383	5.1651e-06	1.36383	8.52966e-06	1.36383	1.45386e-05
1.36627	5.20111e-06	1.36627	8.59375e-06	1.36627	1.46423e-05
1.36871	5.23926e-06	1.36871	8.65784e-06	1.36871	1.47552e-05
1.37115	5.27771e-06	1.37115	8.72803e-06	1.37115	1.48621e-05
1.3736	5.31616e-06	1.3736	8.79211e-06	1.3736	1.49719e-05
1.37604	5.35614e-06	1.37604	8.8623e-06	1.37604	1.50848e-05
1.37848	5.4007e-06	1.37848	8.9325e-06	1.37848	1.51978e-05
1.38092	5.43884e-06	1.38092	8.99963e-06	1.38092	1.53076e-05
1.38336	5.48035e-06	1.38336	9.07288e-06	1.38336	1.54266e-05
1.3858	5.52063e-06	1.3858	9.14307e-06	1.3858	1.55396e-05
1.38824	5.56671e-06	1.38824	9.21631e-06	1.38824	1.56555e-05
1.39069	5.60883e-06	1.39069	9.2865e-06	1.39069	1.57684e-05
1.39313	5.65216e-06	1.39313	9.35974e-06	1.39313	1.58875e-05
1.39557	5.69672e-06	1.39557	9.43298e-06	1.39557	1.60065e-05
1.39801	5.74066e-06	1.39801	9.50928e-06	1.39801	1.61285e-05
1.40045	5.78186e-06	1.40045	9.57947e-06	1.40045	1.62445e-05
1.40289	5.83099e-06	1.40289	9.65881e-06	1.40289	1.63666e-05
1.40533	5.87463e-06	1.40533	9.73206e-06	1.40533	1.64856e-05
1.40778	5.9201e-06	1.40778	9.8114e-06	1.40778	1.66077e-05
1.41022	5.96832e-06	1.41022	9.8877e-06	1.41022	1.67297e-05
1.41266	6.01746e-06	1.41266	9.96399e-06	1.41266	1.68549e-05
1.4151	6.06995e-06	1.4151	1.00433e-05	1.4151	1.698e-05
1.41754	6.12488e-06	1.41754	1.01257e-05	1.41754	1.71082e-05
1.41998	6.17065e-06	1.41998	1.0202e-05	1.41998	1.72333e-05
1.42242	6.22253e-06	1.42242	1.02844e-05	1.42242	1.73645e-05
1.42487	6.27441e-06	1.42487	1.03638e-05	1.42487	1.74896e-05
1.42731	6.32629e-06	1.42731	1.04462e-05	1.42731	1.76239e-05
1.42975	6.37817e-06	1.42975	1.05255e-05	1.42975	1.7749e-05
1.43219	6.43311e-06	1.43219	1.0611e-05	1.43219	1.78833e-05
1.43463	6.48804e-06	1.43463	1.06934e-05	1.43463	1.80176e-05
1.43707	6.53992e-06	1.43707	1.07819e-05	1.43707	1.81549e-05
1.43951	6.5918e-06	1.43951	1.08643e-05	1.43951	1.82892e-05
1.44196	6.64978e-06	1.44196	1.09558e-05	1.44196	1.84296e-05
1.4444	6.70166e-06	1.4444	1.10413e-05	1.4444	1.85608e-05
1.44684	6.7627e-06	1.44684	1.11298e-05	1.44684	1.87042e-05
1.44928	6.82068e-06	1.44928	1.12183e-05	1.44928	1.88416e-05
1.45172	6.88171e-06	1.45172	1.13098e-05	1.45172	1.89819e-05
1.45416	6.9397e-06	1.45416	1.14014e-05	1.45416	1.91284e-05
1.4566	7.00073e-06	1.4566	1.1496e-05	1.4566	1.92749e-05
1.45905	7.05872e-06	1.45905	1.15845e-05	1.45905	1.94153e-05
1.46149	7.1228e-06	1.46149	1.16821e-05	1.46149	1.95648e-05
1.46393	7.18079e-06	1.46393	1.17737e-05	1.46393	1.97052e-05
1.46637	7.24792e-06	1.46637	1.18713e-05	1.46637	1.98608e-05
1.46881	7.30896e-06	1.46881	1.19659e-05	1.46881	2.00073e-05
1.47125	7.3761e-06	1.47125	1.20636e-05	1.47125	2.01569e-05
1.47369	7.44019e-06	1.47369	1.21613e-05	1.47369	2.03094e-05
1.47614	7.50732e-06	1.47614	1.2262e-05	1.47614	2.04681e-05
1.47858	7.57141e-06	1.47858	1.23596e-05	1.47858	2.06207e-05
1.48102	7.63855e-06	1.48102	1.24664e-05	1.48102	2.07794e-05
1.48346	7.70264e-06	1.48346	1.25641e-05	1.48346	2.09351e-05
1.4859	7.76978e-06	1.4859	1.26678e-05	1.4859	2.10938e-05
1.48834	7.83386e-06	1.48834	1.27716e-05	1.48834	2.12524e-05
1.49078	7.90405e-06	1.49078	1.28784e-05	1.49078	2.14111e-05
1.49323	7.97119e-06	1.49323	1.29852e-05	1.49323	2.15759e-05
1.49567	8.04443e-06	1.49567	1.30951e-05	1.49567	2.17438e-05
1.49811	8.11157e-06	1.49811	1.32019e-05	1.49811	2.19055e-05
1.50055	8.18481e-06	1.50055	1.33118e-05	1.50055	2.20764e-05

## Sheet: Figure 4 (b)
-1.4975	-3.64532e-05	-1.4975	-1.02728e-05	-1.4975	-9.99969e-06
-1.49506	-2.95288e-05	-1.49506	-3.69522e-05	-1.49506	-6.20178e-05
-1.49261	-2.55432e-05	-1.49261	-3.31253e-05	-1.49261	-5.58167e-05
-1.49017	-2.29095e-05	-1.49017	-3.05405e-05	-1.49017	-5.14221e-05
-1.48773	-2.09991e-05	-1.48773	-2.86087e-05	-1.48773	-4.81415e-05
-1.48529	-1.95465e-05	-1.48529	-2.7095e-05	-1.48529	-4.55048e-05
-1.48285	-1.83899e-05	-1.48285	-2.5853e-05	-1.48285	-4.33197e-05
-1.48041	-1.74316e-05	-1.48041	-2.48001e-05	-1.48041	-4.14764e-05
-1.47797	-1.66199e-05	-1.47797	-2.38907e-05	-1.47797	-3.98804e-05
-1.47552	-1.5918e-05	-1.47552	-2.30911e-05	-1.47552	-3.82874e-05
-1.47308	-1.53015e-05	-1.47308	-2.2374e-05	-1.47308	-3.7027e-05
-1.47064	-1.47705e-05	-1.47064	-2.1727e-05	-1.47064	-3.59039e-05
-1.4682	-1.42792e-05	-1.4682	-2.1141e-05	-1.4682	-3.48663e-05
-1.46576	-1.38428e-05	-1.46576	-2.06039e-05	-1.46576	-3.39264e-05
-1.46332	-1.34277e-05	-1.46332	-2.01034e-05	-1.46332	-3.30475e-05
-1.46088	-1.30463e-05	-1.46088	-1.96457e-05	-1.46088	-3.22388e-05
-1.45844	-1.26953e-05	-1.45844	-1.92154e-05	-1.45844	-3.14819e-05
-1.45599	-1.2381e-05	-1.45599	-1.88064e-05	-1.45599	-3.07709e-05
-1.45355	-1.2088e-05	-1.45355	-1.84189e-05	-1.45355	-3.00995e-05
-1.45111	-1.18042e-05	-1.45111	-1.80649e-05	-1.45111	-2.94678e-05
-1.44867	-1.15295e-05	-1.44867	-1.772e-05	-1.44867	-2.88605e-05
-1.44623	-1.12701e-05	-1.44623	-1.73935e-05	-1.44623	-2.8299e-05
-1.44379	-1.10321e-05	-1.44379	-1.70853e-05	-1.44379	-2.77496e-05
-1.44135	-1.08063e-05	-1.44135	-1.67831e-05	-1.44135	-2.72369e-05
-1.4389	-1.05896e-05	-1.4389	-1.64993e-05	-1.4389	-2.67395e-05
-1.43646	-1.0379e-05	-1.43646	-1.62277e-05	-1.43646	-2.62665e-05
-1.43402	-1.01776e-05	-1.43402	-1.59592e-05	-1.43402	-2.58057e-05
-1.43158	-9.9884e-06	-1.43158	-1.57089e-05	-1.43158	-2.53723e-05
-1.42914	-9.80835e-06	-1.42914	-1.54648e-05	-1.42914	-2.4942e-05
-1.4267	-9.63135e-06	-1.4267	-1.52267e-05	-1.4267	-2.45392e-05
-1.42426	-9.46045e-06	-1.42426	-1.49979e-05	-1.42426	-2.41425e-05
-1.42181	-9.29871e-06	-1.42181	-1.47812e-05	-1.42181	-2.3764e-05
-1.41937	-9.14001e-06	-1.41937	-1.45676e-05	-1.41937	-2.33948e-05
-1.41693	-8.98438e-06	-1.41693	-1.436e-05	-1.41693	-2.30377e-05
-1.41449	-8.83484e-06	-1.41449	-1.41556e-05	-1.41449	-2.26837e-05
-1.41205	-8.69141e-06	-1.41205	-1.39633e-05	-1.41205	-2.23541e-05
-1.40961	-8.55408e-06	-1.40961	-1.3768e-05	-1.40961	-2.20215e-05
-1.40717	-8.42285e-06	-1.40717	-1.35818e-05	-1.40717	-2.17041e-05
-1.40472	-8.29468e-06	-1.40472	-1.33987e-05	-1.40472	-2.13959e-05
-1.40228	-8.17261e-06	-1.40228	-1.32187e-05	-1.40228	-2.10938e-05
-1.39984	-8.05359e-06	-1.39984	-1.30447e-05	-1.39984	-2.08008e-05
-1.3974	-7.93457e-06	-1.3974	-1.28738e-05	-1.3974	-2.05109e-05
-1.39496	-7.8186e-06	-1.39496	-1.27029e-05	-1.39496	-2.02271e-05
-1.39252	-7.70874e-06	-1.39252	-1.25412e-05	-1.39252	-1.99554e-05
-1.39008	-7.59583e-06	-1.39008	-1.23794e-05	-1.39008	-1.96808e-05
-1.38763	-7.48901e-06	-1.38763	-1.22238e-05	-1.38763	-1.94244e-05
-1.38519	-7.38525e-06	-1.38519	-1.20712e-05	-1.38519	-1.91681e-05
-1.38275	-7.28455e-06	-1.38275	-1.19217e-05	-1.38275	-1.89178e-05
-1.38031	-7.18079e-06	-1.38031	-1.17782e-05	-1.38031	-1.86737e-05
-1.37787	-7.08923e-06	-1.37787	-1.16318e-05	-1.37787	-1.84326e-05
-1.37543	-7.00073e-06	-1.37543	-1.14883e-05	-1.37543	-1.81946e-05
-1.37299	-6.91223e-06	-1.37299	-1.13541e-05	-1.37299	-1.79657e-05
-1.37054	-6.81458e-06	-1.37054	-1.12137e-05	-1.37054	-1.77368e-05
-1.3681	-6.72607e-06	-1.3681	-1.10855e-05	-1.3681	-1.75171e-05
-1.36566	-6.64063e-06	-1.36566	-1.09512e-05	-1.36566	-1.72943e-05
-1.36322	-6.56433e-06	-1.36322	-1.08261e-05	-1.36322	-1.70837e-05
-1.36078	-6.48193e-06	-1.36078	-1.0701e-05	-1.36078	-1.68732e-05
-1.35834	-6.40564e-06	-1.35834	-1.0582e-05	-1.35834	-1.66656e-05
-1.3559	-6.32324e-06	-1.3559	-1.04599e-05	-1.3559	-1.64581e-05
-1.35345	-6.25e-06	-1.35345	-1.0347e-05	-1.35345	-1.62628e-05
-1.35101	-6.17065e-06	-1.35101	-1.0231e-05	-1.35101	-1.60614e-05
-1.34857	-6.10046e-06	-1.34857	-1.01211e-05	-1.34857	-1.58722e-05
-1.34613	-6.02722e-06	-1.34613	-1.00021e-05	-1.34613	-1.56769e-05
-1.34369	-5.95703e-06	-1.34369	-9.89837e-06	-1.34369	-1.54907e-05
-1.34125	-5.88684e-06	-1.34125	-9.78545e-06	-1.34125	-1.53076e-05
-1.33881	-5.8197e-06	-1.33881	-9.67559e-06	-1.33881	-1.51245e-05
-1.33636	-5.75562e-06	-1.33636	-9.56572e-06	-1.33636	-1.49445e-05
-1.33392	-5.69153e-06	-1.33392	-9.45891e-06	-1.33392	-1.47736e-05
-1.33148	-5.62744e-06	-1.33148	-9.35515e-06	-1.33148	-1.45996e-05
-1.32904	-5.56641e-06	-1.32904	-9.25445e-06	-1.32904	-1.44318e-05
-1.3266	-5.50537e-06	-1.3266	-9.15069e-06	-1.3266	-1.42609e-05
-1.32416	-5.44434e-06	-1.32416	-9.04998e-06	-1.32416	-1.4093e-05
-1.32172	-5.38635e-06	-1.32172	-8.95232e-06	-1.32172	-1.39282e-05
-1.31927	-5.32837e-06	-1.31927	-8.85467e-06	-1.31927	-1.37665e-05
-1.31683	-5.27039e-06	-1.31683	-8.75701e-06	-1.31683	-1.36047e-05
-1.31439	-5.21545e-06	-1.31439	-8.65935e-06	-1.31439	-1.3446e-05
-1.31195	-5.15747e-06	-1.31195	-8.56475e-06	-1.31195	-1.32904e-05
-1.30951	-5.10254e-06	-1.30951	-8.4732e-06	-1.30951	-1.31439e-05
-1.30707	-5.04761e-06	-1.30707	-8.37859e-06	-1.30707	-1.29913e-05
-1.30463	-4.99268e-06	-1.30463	-8.29009e-06	-1.30463	-1.28448e-05
-1.30219	-4.9408e-06	-1.30219	-8.19854e-06	-1.30219	-1.26953e-05
-1.29974	-4.88586e-06	-1.29974	-8.11004e-06	-1.29974	-1.25549e-05
-1.2973	-4.83093e-06	-1.2973	-8.02154e-06	-1.2973	-1.24084e-05
-1.29486	-4.78516e-06	-1.29486	-7.93914e-06	-1.29486	-1.22681e-05
-1.29242	-4.73755e-06	-1.29242	-7.85064e-06	-1.29242	-1.21277e-05
-1.28998	-4.69391e-06	-1.28998	-7.76824e-06	-1.28998	-1.19904e-05
-1.28754	-4.65332e-06	-1.28754	-7.68584e-06	-1.28754	-1.18561e-05
-1.2851	-4.61853e-06	-1.2851	-7.60344e-06	-1.2851	-1.17249e-05
-1.28265	-4.58008e-06	-1.28265	-7.5241e-06	-1.28265	-1.15936e-05
-1.28021	-4.53339e-06	-1.28021	-7.4417e-06	-1.28021	-1.14624e-05
-1.27777	-4.48883e-06	-1.27777	-7.36236e-06	-1.27777	-1.13312e-05
-1.27533	-4.44366e-06	-1.27533	-7.28301e-06	-1.27533	-1.12061e-05
-1.27289	-4.40094e-06	-1.27289	-7.20366e-06	-1.27289	-1.10748e-05
-1.27045	-4.36127e-06	-1.27045	-7.13042e-06	-1.27045	-1.09528e-05
-1.26801	-4.32037e-06	-1.26801	-7.05108e-06	-1.26801	-1.08276e-05
-1.26556	-4.28284e-06	-1.26556	-6.97783e-06	-1.26556	-1.07086e-05
-1.26312	-4.24927e-06	-1.26312	-6.90459e-06	-1.26312	-1.05865e-05
-1.26068	-4.21448e-06	-1.26068	-6.8283e-06	-1.26068	-1.04675e-05
-1.25824	-4.17572e-06	-1.25824	-6.752e-06	-1.25824	-1.03455e-05
-1.2558	-4.14215e-06	-1.2558	-6.67876e-06	-1.2558	-1.02325e-05
-1.25336	-4.10645e-06	-1.25336	-6.60552e-06	-1.25336	-1.01135e-05
-1.25092	-4.07349e-06	-1.25092	-6.53533e-06	-1.25092	-1.00006e-05
-1.24847	-4.04022e-06	-1.24847	-6.46514e-06	-1.24847	-9.8877e-06
-1.24603	-4.00635e-06	-1.24603	-6.39495e-06	-1.24603	-9.77783e-06
-1.24359	-3.97186e-06	-1.24359	-6.32476e-06	-1.24359	-9.66797e-06
-1.24115	-3.94012e-06	-1.24115	-6.25762e-06	-1.24115	-9.55505e-06
-1.23871	-3.90503e-06	-1.23871	-6.18743e-06	-1.23871	-9.44519e-06
-1.23627	-3.87329e-06	-1.23627	-6.12334e-06	-1.23627	-9.33838e-06
-1.23383	-3.83911e-06	-1.23383	-6.0562e-06	-1.23383	-9.22852e-06
-1.23138	-3.80768e-06	-1.23138	-5.99212e-06	-1.23138	-9.12476e-06
-1.22894	-3.78143e-06	-1.22894	-5.92803e-06	-1.22894	-9.01794e-06
-1.2265	-3.75183e-06	-1.2265	-5.86089e-06	-1.2265	-8.91113e-06
-1.22406	-3.72406e-06	-1.22406	-5.80291e-06	-1.22406	-8.81042e-06
-1.22162	-3.69324e-06	-1.22162	-5.73882e-06	-1.22162	-8.70667e-06
-1.21918	-3.66669e-06	-1.21918	-5.67473e-06	-1.21918	-8.60291e-06
-1.21674	-3.64075e-06	-1.21674	-5.61675e-06	-1.21674	-8.50525e-06
-1.21429	-3.61267e-06	-1.21429	-5.55266e-06	-1.21429	-8.40149e-06
-1.21185	-3.59039e-06	-1.21185	-5.49773e-06	-1.21185	-8.30383e-06
-1.20941	-3.56415e-06	-1.20941	-5.4367e-06	-1.20941	-8.20313e-06
-1.20697	-3.53882e-06	-1.20697	-5.37566e-06	-1.20697	-8.10547e-06
-1.20453	-3.51318e-06	-1.20453	-5.31463e-06	-1.20453	-8.00781e-06
-1.20209	-3.48999e-06	-1.20209	-5.25969e-06	-1.20209	-7.9071e-06
-1.19965	-3.46649e-06	-1.19965	-5.19866e-06	-1.19965	-7.80945e-06
-1.1972	-3.44452e-06	-1.1972	-5.14068e-06	-1.1972	-7.7179e-06
-1.19476	-3.42072e-06	-1.19476	-5.08574e-06	-1.19476	-7.61719e-06
-1.19232	-3.39966e-06	-1.19232	-5.03325e-06	-1.19232	-7.52258e-06
-1.18988	-3.37463e-06	-1.18988	-4.97191e-06	-1.18988	-7.42493e-06
-1.18744	-3.35266e-06	-1.18744	-4.91546e-06	-1.18744	-7.33337e-06
-1.185	-3.32764e-06	-1.185	-4.86052e-06	-1.185	-7.23877e-06
-1.18256	-3.30444e-06	-1.18256	-4.80407e-06	-1.18256	-7.14417e-06
-1.18011	-3.28217e-06	-1.18011	-4.74914e-06	-1.18011	-7.05261e-06
-1.17767	-3.2608e-06	-1.17767	-4.69542e-06	-1.17767	-6.96411e-06
-1.17523	-3.23914e-06	-1.17523	-4.64202e-06	-1.17523	-6.86951e-06
-1.17279	-3.21472e-06	-1.17279	-4.58922e-06	-1.17279	-6.78101e-06
-1.17035	-3.19e-06	-1.17035	-4.53399e-06	-1.17035	-6.68945e-06
-1.16791	-3.16895e-06	-1.16791	-4.48241e-06	-1.16791	-6.60095e-06
-1.16547	-3.14575e-06	-1.16547	-4.42931e-06	-1.16547	-6.51245e-06
-1.16302	-3.12347e-06	-1.16302	-4.37865e-06	-1.16302	-6.42395e-06
-1.16058	-3.09937e-06	-1.16058	-4.32464e-06	-1.16058	-6.3385e-06
-1.15814	-3.07739e-06	-1.15814	-4.27703e-06	-1.15814	-6.25305e-06
-1.1557	-3.05359e-06	-1.1557	-4.22454e-06	-1.1557	-6.16455e-06
-1.15326	-3.03101e-06	-1.15326	-4.17388e-06	-1.15326	-6.08215e-06
-1.15082	-3.01239e-06	-1.15082	-4.12261e-06	-1.15082	-5.99365e-06
-1.14838	-2.99469e-06	-1.14838	-4.07317e-06	-1.14838	-5.91125e-06
-1.14594	-2.97638e-06	-1.14594	-4.02343e-06	-1.14594	-5.82886e-06
-1.14349	-2.96021e-06	-1.14349	-3.97368e-06	-1.14349	-5.74341e-06
-1.14105	-2.94067e-06	-1.14105	-3.92516e-06	-1.14105	-5.65796e-06
-1.13861	-2.92419e-06	-1.13861	-3.87816e-06	-1.13861	-5.57861e-06
-1.13617	-2.9068e-06	-1.13617	-3.82964e-06	-1.13617	-5.49622e-06
-1.13373	-2.88818e-06	-1.13373	-3.78447e-06	-1.13373	-5.41687e-06
-1.13129	-2.86896e-06	-1.13129	-3.73717e-06	-1.13129	-5.33447e-06
-1.12885	-2.85248e-06	-1.12885	-3.69201e-06	-1.12885	-5.25818e-06
-1.1264	-2.83173e-06	-1.1264	-3.6444e-06	-1.1264	-5.17578e-06
-1.12396	-2.81433e-06	-1.12396	-3.59893e-06	-1.12396	-5.09949e-06
-1.12152	-2.79449e-06	-1.12152	-3.55498e-06	-1.12152	-5.01709e-06
-1.11908	-2.77893e-06	-1.11908	-3.51287e-06	-1.11908	-4.9408e-06
-1.11664	-2.76245e-06	-1.11664	-3.46801e-06	-1.11664	-4.8645e-06
-1.1142	-2.74628e-06	-1.1142	-3.42803e-06	-1.1142	-4.79126e-06
-1.11176	-2.72736e-06	-1.11176	-3.38439e-06	-1.11176	-4.72046e-06
-1.10931	-2.70935e-06	-1.10931	-3.34075e-06	-1.10931	-4.6463e-06
-1.10687	-2.69165e-06	-1.10687	-3.30016e-06	-1.10687	-4.57001e-06
-1.10443	-2.67303e-06	-1.10443	-3.25835e-06	-1.10443	-4.4986e-06
-1.10199	-2.65594e-06	-1.10199	-3.21929e-06	-1.10199	-4.42535e-06
-1.09955	-2.63885e-06	-1.09955	-3.1784e-06	-1.09955	-4.3573e-06
-1.09711	-2.62421e-06	-1.09711	-3.13872e-06	-1.09711	-4.28558e-06
-1.09467	-2.60895e-06	-1.09467	-3.09905e-06	-1.09467	-4.21722e-06
-1.09222	-2.59277e-06	-1.09222	-3.05938e-06	-1.09222	-4.14795e-06
-1.08978	-2.57568e-06	-1.08978	-3.02184e-06	-1.08978	-4.08173e-06
-1.08734	-2.56012e-06	-1.08734	-2.984e-06	-1.08734	-4.01489e-06
-1.0849	-2.54486e-06	-1.0849	-2.94799e-06	-1.0849	-3.94867e-06
-1.08246	-2.52991e-06	-1.08246	-2.90984e-06	-1.08246	-3.88153e-06
-1.08002	-2.51556e-06	-1.08002	-2.87383e-06	-1.08002	-3.81866e-06
-1.07758	-2.50092e-06	-1.07758	-2.83599e-06	-1.07758	-3.75458e-06
-1.07513	-2.48627e-06	-1.07513	-2.80059e-06	-1.07513	-3.69293e-06
-1.07269	-2.47192e-06	-1.07269	-2.76488e-06	-1.07269	-3.62976e-06
-1.07025	-2.45728e-06	-1.07025	-2.73192e-06	-1.07025	-3.57117e-06
-1.06781	-2.44507e-06	-1.06781	-2.69652e-06	-1.06781	-3.51318e-06
-1.06537	-2.43317e-06	-1.06537	-2.66234e-06	-1.06537	-3.45551e-06
-1.06293	-2.41852e-06	-1.06293	-2.62664e-06	-1.06293	-3.3963e-06
-1.06049	-2.40509e-06	-1.06049	-2.59582e-06	-1.06049	-3.34106e-06
-1.05804	-2.38983e-06	-1.05804	-2.56377e-06	-1.05804	-3.28613e-06
-1.0556	-2.37946e-06	-1.0556	-2.53264e-06	-1.0556	-3.2312e-06
-1.05316	-2.36694e-06	-1.05316	-2.49968e-06	-1.05316	-3.17688e-06
-1.05072	-2.35199e-06	-1.05072	-2.47008e-06	-1.05072	-3.12378e-06
-1.04828	-2.33978e-06	-1.04828	-2.44079e-06	-1.04828	-3.07404e-06
-1.04584	-2.32574e-06	-1.04584	-2.41149e-06	-1.04584	-3.01971e-06
-1.0434	-2.31232e-06	-1.0434	-2.38372e-06	-1.0434	-2.96661e-06
-1.04095	-2.29889e-06	-1.04095	-2.35381e-06	-1.04095	-2.91718e-06
-1.03851	-2.28363e-06	-1.03851	-2.3236e-06	-1.03851	-2.86743e-06
-1.03607	-2.27142e-06	-1.03607	-2.29796e-06	-1.03607	-2.81738e-06
-1.03363	-2.25861e-06	-1.03363	-2.27019e-06	-1.03363	-2.76733e-06
-1.03119	-2.24945e-06	-1.03119	-2.24547e-06	-1.03119	-2.72034e-06
-1.02875	-2.23969e-06	-1.02875	-2.21892e-06	-1.02875	-2.67212e-06
-1.02631	-2.22717e-06	-1.02631	-2.19146e-06	-1.02631	-2.62482e-06
-1.02386	-2.21313e-06	-1.02386	-2.16674e-06	-1.02386	-2.57782e-06
-1.02142	-2.19971e-06	-1.02142	-2.1411e-06	-1.02142	-2.53418e-06
-1.01898	-2.19086e-06	-1.01898	-2.11425e-06	-1.01898	-2.48901e-06
-1.01654	-2.17926e-06	-1.01654	-2.09166e-06	-1.01654	-2.44476e-06
-1.0141	-2.16736e-06	-1.0141	-2.06634e-06	-1.0141	-2.3999e-06
-1.01166	-2.15454e-06	-1.01166	-2.04406e-06	-1.01166	-2.35779e-06
-1.00922	-2.14203e-06	-1.00922	-2.01995e-06	-1.00922	-2.31506e-06
-1.00677	-2.13013e-06	-1.00677	-1.99737e-06	-1.00677	-2.27295e-06
-1.00433	-2.11761e-06	-1.00433	-1.97448e-06	-1.00433	-2.23145e-06
-1.00189	-2.10663e-06	-1.00189	-1.9525e-06	-1.00189	-2.19238e-06
-0.99945	-2.09808e-06	-0.99945	-1.92992e-06	-0.99945	-2.15057e-06
-0.99701	-2.08832e-06	-0.99701	-1.90947e-06	-0.99701	-2.11212e-06
-0.99457	-2.07611e-06	-0.99457	-1.88598e-06	-0.99457	-2.07275e-06
-0.99213	-2.06268e-06	-0.99213	-1.86706e-06	-0.99213	-2.03522e-06
-0.98969	-2.052e-06	-0.98969	-1.84478e-06	-0.98969	-1.9986e-06
-0.98724	-2.03918e-06	-0.98724	-1.82433e-06	-0.98724	-1.96259e-06
-0.9848	-2.0282e-06	-0.9848	-1.80419e-06	-0.9848	-1.92566e-06
-0.98236	-2.0163e-06	-0.98236	-1.78588e-06	-0.98236	-1.89178e-06
-0.97992	-2.00836e-06	-0.97992	-1.76574e-06	-0.97992	-1.85516e-06
-0.97748	-1.99951e-06	-0.97748	-1.7459e-06	-0.97748	-1.82281e-06
-0.97504	-1.98883e-06	-0.97504	-1.72667e-06	-0.97504	-1.78925e-06
-0.9726	-1.97693e-06	-0.9726	-1.70714e-06	-0.9726	-1.75568e-06
-0.97015	-1.96655e-06	-0.97015	-1.68761e-06	-0.97015	-1.72302e-06
-0.96771	-1.95557e-06	-0.96771	-1.66839e-06	-0.96771	-1.69312e-06
-0.96527	-1.94519e-06	-0.96527	-1.65069e-06	-0.96527	-1.66077e-06
-0.96283	-1.9342e-06	-0.96283	-1.6336e-06	-0.96283	-1.62994e-06
-0.96039	-1.92261e-06	-0.96039	-1.61254e-06	-0.96039	-1.59912e-06
-0.95795	-1.91162e-06	-0.95795	-1.59911e-06	-0.95795	-1.57074e-06
-0.95551	-1.90002e-06	-0.95551	-1.58111e-06	-0.95551	-1.54114e-06
-0.95306	-1.89484e-06	-0.95306	-1.56341e-06	-0.95306	-1.51215e-06
-0.95062	-1.88324e-06	-0.95062	-1.54693e-06	-0.95062	-1.48376e-06
-0.94818	-1.87531e-06	-0.94818	-1.53197e-06	-0.94818	-1.45569e-06
-0.94574	-1.8631e-06	-0.94574	-1.51732e-06	-0.94574	-1.42975e-06
-0.9433	-1.85394e-06	-0.9433	-1.50084e-06	-0.9433	-1.40259e-06
-0.94086	-1.84631e-06	-0.94086	-1.48467e-06	-0.94086	-1.37451e-06
-0.93842	-1.83655e-06	-0.93842	-1.46972e-06	-0.93842	-1.35101e-06
-0.93597	-1.82556e-06	-0.93597	-1.45446e-06	-0.93597	-1.32507e-06
-0.93353	-1.81519e-06	-0.93353	-1.44103e-06	-0.93353	-1.29883e-06
-0.93109	-1.80481e-06	-0.93109	-1.42486e-06	-0.93109	-1.27441e-06
-0.92865	-1.79626e-06	-0.92865	-1.41082e-06	-0.92865	-1.25e-06
-0.92621	-1.7868e-06	-0.92621	-1.398e-06	-0.92621	-1.2262e-06
-0.92377	-1.77612e-06	-0.92377	-1.38396e-06	-0.92377	-1.20331e-06
-0.92133	-1.76758e-06	-0.92133	-1.36901e-06	-0.92133	-1.17859e-06
-0.91888	-1.75903e-06	-0.91888	-1.3568e-06	-0.91888	-1.15692e-06
-0.91644	-1.75079e-06	-0.91644	-1.34276e-06	-0.91644	-1.13525e-06
-0.914	-1.74194e-06	-0.914	-1.32964e-06	-0.914	-1.11542e-06
-0.91156	-1.73218e-06	-0.91156	-1.31591e-06	-0.91156	-1.09253e-06
-0.90912	-1.72058e-06	-0.90912	-1.30309e-06	-0.90912	-1.07147e-06
-0.90668	-1.71173e-06	-0.90668	-1.28966e-06	-0.90668	-1.05103e-06
-0.90424	-1.70349e-06	-0.90424	-1.27868e-06	-0.90424	-1.03241e-06
-0.90179	-1.69189e-06	-0.90179	-1.268e-06	-0.90179	-1.01044e-06
-0.89935	-1.68396e-06	-0.89935	-1.25426e-06	-0.89935	-9.92737e-07
-0.89691	-1.67328e-06	-0.89691	-1.24297e-06	-0.89691	-9.72595e-07
-0.89447	-1.66565e-06	-0.89447	-1.2326e-06	-0.89447	-9.53979e-07
-0.89203	-1.65741e-06	-0.89203	-1.22039e-06	-0.89203	-9.36584e-07
-0.88959	-1.64795e-06	-0.88959	-1.20849e-06	-0.88959	-9.18579e-07
-0.88715	-1.6391e-06	-0.88715	-1.19628e-06	-0.88715	-8.99658e-07
-0.8847	-1.62994e-06	-0.8847	-1.18621e-06	-0.8847	-8.83179e-07
-0.88226	-1.6217e-06	-0.88226	-1.17461e-06	-0.88226	-8.65784e-07
-0.87982	-1.61316e-06	-0.87982	-1.16454e-06	-0.87982	-8.5022e-07
-0.87738	-1.6037e-06	-0.87738	-1.15355e-06	-0.87738	-8.34656e-07
-0.87494	-1.59515e-06	-0.87494	-1.14287e-06	-0.87494	-8.17871e-07
-0.8725	-1.586e-06	-0.8725	-1.13341e-06	-0.8725	-8.02307e-07
-0.87006	-1.57745e-06	-0.87006	-1.12151e-06	-0.87006	-7.85828e-07
-0.86761	-1.56555e-06	-0.86761	-1.11327e-06	-0.86761	-7.69348e-07
-0.86517	-1.55701e-06	-0.86517	-1.1032e-06	-0.86517	-7.56531e-07
-0.86273	-1.54663e-06	-0.86273	-1.09252e-06	-0.86273	-7.40356e-07
-0.86029	-1.53748e-06	-0.86029	-1.08489e-06	-0.86029	-7.28455e-07
-0.85785	-1.52863e-06	-0.85785	-1.07543e-06	-0.85785	-7.13196e-07
-0.85541	-1.51825e-06	-0.85541	-1.06505e-06	-0.85541	-6.97632e-07
-0.85297	-1.50757e-06	-0.85297	-1.05773e-06	-0.85297	-6.82983e-07
-0.85052	-1.49902e-06	-0.85052	-1.04796e-06	-0.85052	-6.70776e-07
-0.84808	-1.48926e-06	-0.84808	-1.03789e-06	-0.84808	-6.5979e-07
-0.84564	-1.4801e-06	-0.84564	-1.03148e-06	-0.84564	-6.45447e-07
-0.8432	-1.47064e-06	-0.8432	-1.0205e-06	-0.8432	-6.32324e-07
-0.84076	-1.46057e-06	-0.84076	-1.01317e-06	-0.84076	-6.21643e-07
-0.83832	-1.45172e-06	-0.83832	-1.00585e-06	-0.83832	-6.07605e-07
-0.83588	-1.44318e-06	-0.83588	-9.9822e-07	-0.83588	-5.96619e-07
-0.83344	-1.43494e-06	-0.83344	-9.91506e-07	-0.83344	-5.84717e-07
-0.83099	-1.4267e-06	-0.83099	-9.82656e-07	-0.83099	-5.73425e-07
-0.82855	-1.41968e-06	-0.82855	-9.75332e-07	-0.82855	-5.62744e-07
-0.82611	-1.41205e-06	-0.82611	-9.68618e-07	-0.82611	-5.51758e-07
-0.82367	-1.40381e-06	-0.82367	-9.57937e-07	-0.82367	-5.38025e-07
-0.82123	-1.39709e-06	-0.82123	-9.5519e-07	-0.82123	-5.2887e-07
-0.81879	-1.38916e-06	-0.81879	-9.45119e-07	-0.81879	-5.17578e-07
-0.81635	-1.38e-06	-0.81635	-9.39321e-07	-0.81635	-5.07202e-07
-0.8139	-1.37024e-06	-0.8139	-9.33218e-07	-0.8139	-4.95605e-07
-0.81146	-1.36078e-06	-0.81146	-9.26199e-07	-0.81146	-4.86755e-07
-0.80902	-1.35071e-06	-0.80902	-9.18874e-07	-0.80902	-4.76074e-07
-0.80658	-1.34277e-06	-0.80658	-9.13686e-07	-0.80658	-4.66614e-07
-0.80414	-1.33362e-06	-0.80414	-9.06972e-07	-0.80414	-4.54712e-07
-0.8017	-1.3269e-06	-0.8017	-9.01784e-07	-0.8017	-4.4574e-07
-0.79926	-1.31897e-06	-0.79926	-8.94765e-07	-0.79926	-4.35638e-07
-0.79681	-1.31165e-06	-0.79681	-8.89577e-07	-0.79681	-4.28619e-07
-0.79437	-1.3028e-06	-0.79437	-8.82558e-07	-0.79437	-4.18274e-07
-0.79193	-1.29333e-06	-0.79193	-8.7676e-07	-0.79193	-4.0918e-07
-0.78949	-1.28632e-06	-0.78949	-8.71267e-07	-0.78949	-4.00116e-07
-0.78705	-1.27655e-06	-0.78705	-8.65163e-07	-0.78705	-3.91724e-07
-0.78461	-1.26831e-06	-0.78461	-8.59365e-07	-0.78461	-3.83484e-07
-0.78217	-1.26129e-06	-0.78217	-8.54787e-07	-0.78217	-3.73962e-07
-0.77972	-1.25153e-06	-0.77972	-8.49599e-07	-0.77972	-3.64838e-07
-0.77728	-1.24451e-06	-0.77728	-8.43801e-07	-0.77728	-3.56873e-07
-0.77484	-1.23566e-06	-0.77484	-8.37698e-07	-0.77484	-3.48511e-07
-0.7724	-1.22772e-06	-0.7724	-8.30984e-07	-0.7724	-3.40424e-07
-0.76996	-1.21979e-06	-0.76996	-8.26406e-07	-0.76996	-3.3252e-07
-0.76752	-1.21246e-06	-0.76752	-8.20913e-07	-0.76752	-3.25348e-07
-0.76508	-1.20483e-06	-0.76508	-8.1542e-07	-0.76508	-3.15277e-07
-0.76263	-1.1972e-06	-0.76263	-8.12368e-07	-0.76263	-3.08777e-07
-0.76019	-1.18958e-06	-0.76019	-8.06264e-07	-0.76019	-3.00934e-07
-0.75775	-1.18073e-06	-0.75775	-8.03213e-07	-0.75775	-2.93854e-07
-0.75531	-1.1731e-06	-0.75531	-7.95583e-07	-0.75531	-2.88483e-07
-0.75287	-1.16455e-06	-0.75287	-7.92226e-07	-0.75287	-2.80457e-07
-0.75043	-1.15692e-06	-0.75043	-7.84902e-07	-0.75043	-2.72186e-07
-0.74799	-1.14929e-06	-0.74799	-7.83071e-07	-0.74799	-2.68219e-07
-0.74554	-1.1438e-06	-0.74554	-7.77883e-07	-0.74554	-2.6123e-07
-0.7431	-1.13495e-06	-0.7431	-7.73916e-07	-0.7431	-2.54791e-07
-0.74066	-1.12823e-06	-0.74066	-7.70254e-07	-0.74066	-2.48596e-07
-0.73822	-1.12e-06	-0.73822	-7.64761e-07	-0.73822	-2.4234e-07
-0.73578	-1.11237e-06	-0.73578	-7.62014e-07	-0.73578	-2.37457e-07
-0.73334	-1.10504e-06	-0.73334	-7.56216e-07	-0.73334	-2.32178e-07
-0.7309	-1.09711e-06	-0.7309	-7.53164e-07	-0.7309	-2.26807e-07
-0.72845	-1.08948e-06	-0.72845	-7.49197e-07	-0.72845	-2.2168e-07
-0.72601	-1.08002e-06	-0.72601	-7.45718e-07	-0.72601	-2.16034e-07
-0.72357	-1.07544e-06	-0.72357	-7.41445e-07	-0.72357	-2.10419e-07
-0.72113	-1.06781e-06	-0.72113	-7.37142e-07	-0.72113	-2.06055e-07
-0.71869	-1.05896e-06	-0.71869	-7.35586e-07	-0.71869	-2.01599e-07
-0.71625	-1.05286e-06	-0.71625	-7.32748e-07	-0.71625	-1.96991e-07
-0.71381	-1.04645e-06	-0.71381	-7.2817e-07	-0.71381	-1.90918e-07
-0.71136	-1.03729e-06	-0.71136	-7.26186e-07	-0.71136	-1.85486e-07
-0.70892	-1.02997e-06	-0.70892	-7.23867e-07	-0.70892	-1.82556e-07
-0.70648	-1.02081e-06	-0.70648	-7.1935e-07	-0.70648	-1.77826e-07
-0.70404	-1.01318e-06	-0.70404	-7.16177e-07	-0.70404	-1.73615e-07
-0.7016	-1.00586e-06	-0.7016	-7.13277e-07	-0.7016	-1.67023e-07
-0.69916	-1.00006e-06	-0.69916	-7.08791e-07	-0.69916	-1.62201e-07
-0.69672	-9.93042e-07	-0.69672	-7.07235e-07	-0.69672	-1.60614e-07
-0.69427	-9.85718e-07	-0.69427	-7.04702e-07	-0.69427	-1.54114e-07
-0.69183	-9.78394e-07	-0.69183	-7.01864e-07	-0.69183	-1.5094e-07
-0.68939	-9.69849e-07	-0.68939	-6.993e-07	-0.68939	-1.45935e-07
-0.68695	-9.6283e-07	-0.68695	-6.95608e-07	-0.68695	-1.41968e-07
-0.68451	-9.55811e-07	-0.68451	-6.94814e-07	-0.68451	-1.36902e-07
-0.68207	-9.49097e-07	-0.68207	-6.90725e-07	-0.68207	-1.34918e-07
-0.67963	-9.43298e-07	-0.67963	-6.88497e-07	-0.67963	-1.3089e-07
-0.67719	-9.36279e-07	-0.67719	-6.83981e-07	-0.67719	-1.26892e-07
-0.67474	-9.2926e-07	-0.67474	-6.81417e-07	-0.67474	-1.23932e-07
-0.6723	-9.21021e-07	-0.6723	-6.79403e-07	-0.6723	-1.21307e-07
-0.66986	-9.14612e-07	-0.66986	-6.76504e-07	-0.66986	-1.17737e-07
-0.66742	-9.08203e-07	-0.66742	-6.73574e-07	-0.66742	-1.15143e-07
-0.66498	-9.02405e-07	-0.66498	-6.70126e-07	-0.66498	-1.12457e-07
-0.66254	-8.9386e-07	-0.66254	-6.67226e-07	-0.66254	-1.0907e-07
-0.6601	-8.88977e-07	-0.6601	-6.64114e-07	-0.6601	-1.05835e-07
-0.65765	-8.81958e-07	-0.65765	-6.61092e-07	-0.65765	-1.01471e-07
-0.65521	-8.75244e-07	-0.65521	-6.58041e-07	-0.65521	-1.00525e-07
-0.65277	-8.67615e-07	-0.65277	-6.54745e-07	-0.65277	-9.63135e-08
-0.65033	-8.61206e-07	-0.65033	-6.51235e-07	-0.65033	-9.32617e-08
-0.64789	-8.52966e-07	-0.64789	-6.46688e-07	-0.64789	-8.89893e-08
-0.64545	-8.46863e-07	-0.64545	-6.4501e-07	-0.64545	-8.74023e-08
-0.64301	-8.39844e-07	-0.64301	-6.41103e-07	-0.64301	-8.44421e-08
-0.64056	-8.35266e-07	-0.64056	-6.38357e-07	-0.64056	-8.30383e-08
-0.63812	-8.27942e-07	-0.63812	-6.34267e-07	-0.63812	-7.91931e-08
-0.63568	-8.20618e-07	-0.63568	-6.31277e-07	-0.63568	-7.63855e-08
-0.63324	-8.12988e-07	-0.63324	-6.28103e-07	-0.63324	-7.34558e-08
-0.6308	-8.06885e-07	-0.6308	-6.25661e-07	-0.6308	-7.34253e-08
-0.62836	-7.99866e-07	-0.62836	-6.21908e-07	-0.62836	-6.90918e-08
-0.62592	-7.93152e-07	-0.62592	-6.18307e-07	-0.62592	-6.70471e-08
-0.62347	-7.86743e-07	-0.62347	-6.14767e-07	-0.62347	-6.49414e-08
-0.62103	-7.79419e-07	-0.62103	-6.11105e-07	-0.62103	-6.26831e-08
-0.61859	-7.73621e-07	-0.61859	-6.09457e-07	-0.61859	-5.85022e-08
-0.61615	-7.65991e-07	-0.61615	-6.05825e-07	-0.61615	-5.63049e-08
-0.61371	-7.58667e-07	-0.61371	-6.02224e-07	-0.61371	-5.3894e-08
-0.61127	-7.53479e-07	-0.61127	-5.98806e-07	-0.61127	-5.26123e-08
-0.60883	-7.4585e-07	-0.60883	-5.96609e-07	-0.60883	-4.98352e-08
-0.60638	-7.39441e-07	-0.60638	-5.93099e-07	-0.60638	-4.72717e-08
-0.60394	-7.31506e-07	-0.60394	-5.8959e-07	-0.60394	-4.44641e-08
-0.6015	-7.25403e-07	-0.6015	-5.87148e-07	-0.6015	-4.24194e-08
-0.59906	-7.18689e-07	-0.59906	-5.8312e-07	-0.59906	-4.21143e-08
-0.59662	-7.11975e-07	-0.59662	-5.79855e-07	-0.59662	-3.83301e-08
-0.59418	-7.05872e-07	-0.59418	-5.7604e-07	-0.59418	-3.6377e-08
-0.59174	-6.97632e-07	-0.59174	-5.73446e-07	-0.59174	-3.51257e-08
-0.58929	-6.91833e-07	-0.58929	-5.71127e-07	-0.58929	-3.32031e-08
-0.58685	-6.8573e-07	-0.58685	-5.66915e-07	-0.58685	-3.07007e-08
-0.58441	-6.80847e-07	-0.58441	-5.66549e-07	-0.58441	-2.85645e-08
-0.58197	-6.74438e-07	-0.58197	-5.62154e-07	-0.58197	-2.70386e-08
-0.57953	-6.67419e-07	-0.57953	-5.57821e-07	-0.57953	-2.52075e-08
-0.57709	-6.61316e-07	-0.57709	-5.54464e-07	-0.57709	-2.33765e-08
-0.57465	-6.53992e-07	-0.57465	-5.52206e-07	-0.57465	-2.28882e-08
-0.5722	-6.47888e-07	-0.5722	-5.48879e-07	-0.5722	-2.05688e-08
-0.56976	-6.4209e-07	-0.56976	-5.45858e-07	-0.56976	-1.70898e-08
-0.56732	-6.35681e-07	-0.56732	-5.42806e-07	-0.56732	-1.65405e-08
-0.56488	-6.28357e-07	-0.56488	-5.39022e-07	-0.56488	-1.43433e-08
-0.56244	-6.22864e-07	-0.56244	-5.36916e-07	-0.56244	-1.20544e-08
-0.56	-6.17676e-07	-0.56	-5.34933e-07	-0.56	-1.24817e-08
-0.55756	-6.10657e-07	-0.55756	-5.31179e-07	-0.55756	-8.81958e-09
-0.55511	-6.03943e-07	-0.55511	-5.28829e-07	-0.55511	-7.65991e-09
-0.55267	-5.96619e-07	-0.55267	-5.27273e-07	-0.55267	-6.57349e-09
-0.55023	-5.896e-07	-0.55023	-5.2416e-07	-0.55023	-4.45557e-09
-0.54779	-5.83801e-07	-0.54779	-5.21627e-07	-0.54779	-3.90625e-09
-0.54535	-5.78308e-07	-0.54535	-5.18545e-07	-0.54535	-5.15747e-10
-0.54291	-5.70984e-07	-0.54291	-5.14608e-07	-0.54291	1.27258e-09
-0.54047	-5.63965e-07	-0.54047	-5.12441e-07	-0.54047	2.09961e-09
-0.53802	-5.57251e-07	-0.53802	-5.10458e-07	-0.53802	5.70679e-09
-0.53558	-5.49622e-07	-0.53558	-5.07101e-07	-0.53558	6.10352e-09
-0.53314	-5.45654e-07	-0.53314	-5.0472e-07	-0.53314	7.62939e-09
-0.5307	-5.37415e-07	-0.5307	-5.02737e-07	-0.5307	9.49097e-09
-0.52826	-5.31311e-07	-0.52826	-4.9941e-07	-0.52826	1.15051e-08
-0.52582	-5.24597e-07	-0.52582	-4.97182e-07	-0.52582	1.39618e-08
-0.52338	-5.19409e-07	-0.52338	-4.95138e-07	-0.52338	1.4801e-08
-0.52094	-5.12085e-07	-0.52094	-4.91323e-07	-0.52094	1.58997e-08
-0.51849	-5.05371e-07	-0.51849	-4.8821e-07	-0.51849	1.91956e-08
-0.51605	-4.99268e-07	-0.51605	-4.87936e-07	-0.51605	1.95618e-08
-0.51361	-4.93164e-07	-0.51361	-4.83816e-07	-0.51361	2.09961e-08
-0.51117	-4.86145e-07	-0.51117	-4.82809e-07	-0.51117	2.28271e-08
-0.50873	-4.80042e-07	-0.50873	-4.80489e-07	-0.50873	2.49939e-08
-0.50629	-4.71802e-07	-0.50629	-4.78292e-07	-0.50629	2.75269e-08
-0.50385	-4.65912e-07	-0.50385	-4.76522e-07	-0.50385	2.89001e-08
-0.5014	-4.58221e-07	-0.5014	-4.73531e-07	-0.5014	3.09753e-08
-0.49896	-4.51813e-07	-0.49896	-4.70663e-07	-0.49896	3.32947e-08
-0.49652	-4.45587e-07	-0.49652	-4.68587e-07	-0.49652	3.51563e-08
-0.49408	-4.39392e-07	-0.49408	-4.66848e-07	-0.49408	3.56445e-08
-0.49164	-4.32098e-07	-0.49164	-4.6581e-07	-0.49164	3.93066e-08
-0.4892	-4.27399e-07	-0.4892	-4.62789e-07	-0.4892	3.95508e-08
-0.48676	-4.19464e-07	-0.48676	-4.6108e-07	-0.48676	4.2511e-08
-0.48431	-4.12384e-07	-0.48431	-4.57937e-07	-0.48431	4.26025e-08
-0.48187	-4.05945e-07	-0.48187	-4.56777e-07	-0.48187	4.53796e-08
-0.47943	-3.97827e-07	-0.47943	-4.52352e-07	-0.47943	4.61121e-08
-0.47699	-3.92761e-07	-0.47699	-4.50277e-07	-0.47699	4.7821e-08
-0.47455	-3.85498e-07	-0.47455	-4.47256e-07	-0.47455	4.96216e-08
-0.47211	-3.78906e-07	-0.47211	-4.44997e-07	-0.47211	5.24597e-08
-0.46967	-3.72467e-07	-0.46967	-4.4161e-07	-0.46967	5.27954e-08
-0.46722	-3.66028e-07	-0.46722	-4.38863e-07	-0.46722	5.58167e-08
-0.46478	-3.60535e-07	-0.46478	-4.36819e-07	-0.46478	5.72205e-08
-0.46234	-3.53668e-07	-0.46234	-4.34011e-07	-0.46234	5.84412e-08
-0.4599	-3.46588e-07	-0.4599	-4.30776e-07	-0.4599	5.98145e-08
-0.45746	-3.40851e-07	-0.45746	-4.28518e-07	-0.45746	6.26526e-08
-0.45502	-3.34869e-07	-0.45502	-4.25558e-07	-0.45502	6.38733e-08
-0.45258	-3.27972e-07	-0.45258	-4.23544e-07	-0.45258	6.59485e-08
-0.45013	-3.20679e-07	-0.45013	-4.19118e-07	-0.45013	6.67114e-08
-0.44769	-3.13843e-07	-0.44769	-4.17654e-07	-0.44769	6.91528e-08
-0.44525	-3.07281e-07	-0.44525	-4.14907e-07	-0.44525	6.99158e-08
-0.44281	-3.00873e-07	-0.44281	-4.11794e-07	-0.44281	7.26318e-08
-0.44037	-2.95258e-07	-0.44037	-4.09627e-07	-0.44037	7.32727e-08
-0.43793	-2.89124e-07	-0.43793	-4.06515e-07	-0.43793	7.56531e-08
-0.43549	-2.83844e-07	-0.43549	-4.04226e-07	-0.43549	7.69958e-08
-0.43304	-2.75574e-07	-0.43304	-4.02029e-07	-0.43304	7.87964e-08
-0.4306	-2.7005e-07	-0.4306	-3.98519e-07	-0.4306	7.88269e-08
-0.42816	-2.62909e-07	-0.42816	-3.95773e-07	-0.42816	8.17261e-08
-0.42572	-2.57385e-07	-0.42572	-3.91866e-07	-0.42572	8.37402e-08
-0.42328	-2.51923e-07	-0.42328	-3.90768e-07	-0.42328	8.46252e-08
-0.42084	-2.45911e-07	-0.42084	-3.87838e-07	-0.42084	8.63037e-08
-0.4184	-2.39105e-07	-0.4184	-3.8677e-07	-0.4184	8.89587e-08
-0.41595	-2.33887e-07	-0.41595	-3.83657e-07	-0.41595	8.92334e-08
-0.41351	-2.26044e-07	-0.41351	-3.79995e-07	-0.41351	9.13391e-08
-0.41107	-2.2113e-07	-0.41107	-3.77096e-07	-0.41107	9.32617e-08
-0.40863	-2.16309e-07	-0.40863	-3.74532e-07	-0.40863	9.43604e-08
-0.40619	-2.09961e-07	-0.40619	-3.7261e-07	-0.40619	9.66797e-08
-0.40375	-2.04498e-07	-0.40375	-3.69436e-07	-0.40375	9.63135e-08
-0.40131	-1.99341e-07	-0.40131	-3.66231e-07	-0.40131	9.85413e-08
-0.39886	-1.92017e-07	-0.39886	-3.6437e-07	-0.39886	9.9823e-08
-0.39642	-1.86584e-07	-0.39642	-3.60555e-07	-0.39642	1.01837e-07
-0.39398	-1.79413e-07	-0.39398	-3.58877e-07	-0.39398	1.03485e-07
-0.39154	-1.74316e-07	-0.39154	-3.55947e-07	-0.39154	1.06049e-07
-0.3891	-1.69586e-07	-0.3891	-3.53811e-07	-0.3891	1.06628e-07
-0.38666	-1.6452e-07	-0.38666	-3.51064e-07	-0.38666	1.0791e-07
-0.38422	-1.5741e-07	-0.38422	-3.48135e-07	-0.38422	1.1026e-07
-0.38177	-1.52771e-07	-0.38177	-3.47829e-07	-0.38177	1.12e-07
-0.37933	-1.47217e-07	-0.37933	-3.44106e-07	-0.37933	1.13647e-07
-0.37689	-1.43463e-07	-0.37689	-3.40688e-07	-0.37689	1.14319e-07
-0.37445	-1.37329e-07	-0.37445	-3.40108e-07	-0.37445	1.16486e-07
-0.37201	-1.33087e-07	-0.37201	-3.37026e-07	-0.37201	1.16486e-07
-0.36957	-1.26312e-07	-0.36957	-3.35348e-07	-0.36957	1.18774e-07
-0.36713	-1.21552e-07	-0.36713	-3.32876e-07	-0.36713	1.20544e-07
-0.36469	-1.17737e-07	-0.36469	-3.31014e-07	-0.36469	1.21613e-07
-0.36224	-1.11084e-07	-0.36224	-3.29183e-07	-0.36224	1.24115e-07
-0.3598	-1.05927e-07	-0.3598	-3.28237e-07	-0.3598	1.25519e-07
-0.35736	-1.01074e-07	-0.35736	-3.24483e-07	-0.35736	1.27167e-07
-0.35492	-9.67407e-08	-0.35492	-3.22927e-07	-0.35492	1.27899e-07
-0.35248	-9.30786e-08	-0.35248	-3.21065e-07	-0.35248	1.27991e-07
-0.35004	-8.73718e-08	-0.35004	-3.20455e-07	-0.35004	1.30096e-07
-0.3476	-8.32214e-08	-0.3476	-3.17434e-07	-0.3476	1.32446e-07
-0.34515	-7.82471e-08	-0.34515	-3.15633e-07	-0.34515	1.33698e-07
-0.34271	-7.4646e-08	-0.34271	-3.13711e-07	-0.34271	1.36383e-07
-0.34027	-6.93359e-08	-0.34027	-3.10506e-07	-0.34027	1.36292e-07
-0.33783	-6.66199e-08	-0.33783	-3.08034e-07	-0.33783	1.37817e-07
-0.33539	-6.14624e-08	-0.33539	-3.06448e-07	-0.33539	1.39282e-07
-0.33295	-5.82581e-08	-0.33295	-3.06448e-07	-0.33295	1.41296e-07
-0.33051	-5.22461e-08	-0.33051	-3.02938e-07	-0.33051	1.42029e-07
-0.32806	-4.98657e-08	-0.32806	-3.01748e-07	-0.32806	1.44257e-07
-0.32562	-4.55933e-08	-0.32562	-2.99337e-07	-0.32562	1.45142e-07
-0.32318	-4.14734e-08	-0.32318	-2.9717e-07	-0.32318	1.4679e-07
-0.32074	-3.84827e-08	-0.32074	-2.94179e-07	-0.32074	1.48346e-07
-0.3183	-3.19519e-08	-0.3183	-2.91585e-07	-0.3183	1.47919e-07
-0.31586	-2.83813e-08	-0.31586	-2.88839e-07	-0.31586	1.5213e-07
-0.31342	-2.56042e-08	-0.31342	-2.88338e-07	-0.31342	1.51581e-07
-0.31097	-2.20642e-08	-0.31097	-2.85726e-07	-0.31097	1.52344e-07
-0.30853	-1.89209e-08	-0.30853	-2.82458e-07	-0.30853	1.53778e-07
-0.30609	-1.55334e-08	-0.30609	-2.80782e-07	-0.30609	1.56067e-07
-0.30365	-1.2207e-08	-0.30365	-2.79067e-07	-0.30365	1.5744e-07
-0.30121	-7.8125e-09	-0.30121	-2.76693e-07	-0.30121	1.58783e-07
-0.29877	-5.79834e-09	-0.29877	-2.74862e-07	-0.29877	1.6098e-07
-0.29633	-1.61743e-09	-0.29633	-2.7297e-07	-0.29633	1.61469e-07
-0.29388	1.46484e-09	-0.29388	-2.70965e-07	-0.29388	1.63452e-07
-0.29144	5.76172e-09	-0.29144	-2.68386e-07	-0.29144	1.64948e-07
-0.289	7.84302e-09	-0.289	-2.66146e-07	-0.289	1.64703e-07
-0.28656	1.08643e-08	-0.28656	-2.63122e-07	-0.28656	1.67847e-07
-0.28412	1.40076e-08	-0.28412	-2.61404e-07	-0.28412	1.6806e-07
-0.28168	1.72729e-08	-0.28168	-2.58413e-07	-0.28168	1.69037e-07
-0.27924	1.95313e-08	-0.27924	-2.5646e-07	-0.27924	1.71082e-07
-0.27679	2.28577e-08	-0.27679	-2.53377e-07	-0.27679	1.72241e-07
-0.27435	2.5116e-08	-0.27435	-2.52401e-07	-0.27435	1.74225e-07
-0.27191	2.6947e-08	-0.27191	-2.48403e-07	-0.27191	1.75537e-07
-0.26947	2.98767e-08	-0.26947	-2.4764e-07	-0.26947	1.77155e-07
-0.26703	3.2074e-08	-0.26703	-2.45046e-07	-0.26703	1.78009e-07
-0.26459	3.6377e-08	-0.26459	-2.41384e-07	-0.26459	1.79688e-07
-0.26215	3.87878e-08	-0.26215	-2.39034e-07	-0.26215	1.80603e-07
-0.2597	4.09851e-08	-0.2597	-2.37752e-07	-0.2597	1.83105e-07
-0.25726	4.37317e-08	-0.25726	-2.34975e-07	-0.25726	1.84448e-07
-0.25482	4.5166e-08	-0.25482	-2.33572e-07	-0.25482	1.85547e-07
-0.25238	4.84924e-08	-0.25238	-2.29269e-07	-0.25238	1.8576e-07
-0.24994	5.08423e-08	-0.24994	-2.27193e-07	-0.24994	1.87042e-07
-0.2475	5.23987e-08	-0.2475	-2.24142e-07	-0.2475	1.87775e-07
-0.24506	5.39551e-08	-0.24506	-2.22646e-07	-0.24506	1.89514e-07
-0.24261	5.74951e-08	-0.24261	-2.21761e-07	-0.24261	1.92291e-07
-0.24017	5.96619e-08	-0.24017	-2.18679e-07	-0.24017	1.94061e-07
-0.23773	6.13708e-08	-0.23773	-2.14376e-07	-0.23773	1.95313e-07
-0.23529	6.34766e-08	-0.23529	-2.12148e-07	-0.23529	1.95709e-07
-0.23285	6.56738e-08	-0.23285	-2.10104e-07	-0.23285	1.97052e-07
-0.23041	6.78711e-08	-0.23041	-2.07082e-07	-0.23041	1.96869e-07
-0.22797	6.91528e-08	-0.22797	-2.05556e-07	-0.22797	1.99829e-07
-0.22552	7.00684e-08	-0.22552	-2.03329e-07	-0.22552	2.02423e-07
-0.22308	7.30896e-08	-0.22308	-2.00887e-07	-0.22308	2.02576e-07
-0.22064	7.35779e-08	-0.22064	-1.97256e-07	-0.22064	2.03522e-07
-0.2182	7.48901e-08	-0.2182	-1.95913e-07	-0.2182	2.04376e-07
-0.21576	7.88269e-08	-0.21576	-1.94997e-07	-0.21576	2.07611e-07
-0.21332	7.97424e-08	-0.21332	-1.91976e-07	-0.21332	2.09167e-07
-0.21088	8.078e-08	-0.21088	-1.90603e-07	-0.21088	2.10083e-07
-0.20844	8.28857e-08	-0.20844	-1.86666e-07	-0.20844	2.10754e-07
-0.20599	8.5144e-08	-0.20599	-1.85262e-07	-0.20599	2.12097e-07
-0.20355	8.70667e-08	-0.20355	-1.81875e-07	-0.20355	2.13379e-07
-0.20111	8.92944e-08	-0.20111	-1.79067e-07	-0.20111	2.14783e-07
-0.19867	8.99353e-08	-0.19867	-1.77419e-07	-0.19867	2.14874e-07
-0.19623	9.20715e-08	-0.19623	-1.75558e-07	-0.19623	2.17163e-07
-0.19379	9.32312e-08	-0.19379	-1.72597e-07	-0.19379	2.17743e-07
-0.19135	9.45129e-08	-0.19135	-1.71529e-07	-0.19135	2.20337e-07
-0.1889	9.48181e-08	-0.1889	-1.68386e-07	-0.1889	2.21283e-07
-0.18646	9.67102e-08	-0.18646	-1.66372e-07	-0.18646	2.2168e-07
-0.18402	9.89685e-08	-0.18402	-1.62252e-07	-0.18402	2.23053e-07
-0.18158	9.92126e-08	-0.18158	-1.60757e-07	-0.18158	2.24335e-07
-0.17914	1.01807e-07	-0.17914	-1.58804e-07	-0.17914	2.26654e-07
-0.1767	1.03607e-07	-0.1767	-1.5563e-07	-0.1767	2.26898e-07
-0.17426	1.05438e-07	-0.17426	-1.53616e-07	-0.17426	2.28027e-07
-0.17181	1.06598e-07	-0.17181	-1.49709e-07	-0.17181	2.29462e-07
-0.16937	1.06995e-07	-0.16937	-1.4858e-07	-0.16937	2.3114e-07
-0.16693	1.09283e-07	-0.16693	-1.47115e-07	-0.16693	2.32269e-07
-0.16449	1.10657e-07	-0.16449	-1.42843e-07	-0.16449	2.33704e-07
-0.16205	1.1264e-07	-0.16205	-1.41103e-07	-0.16205	2.35077e-07
-0.15961	1.12762e-07	-0.15961	-1.36556e-07	-0.15961	2.36542e-07
-0.15717	1.12244e-07	-0.15717	-1.36098e-07	-0.15717	2.37549e-07
-0.15472	1.14563e-07	-0.15472	-1.34206e-07	-0.15472	2.38098e-07
-0.15228	1.16516e-07	-0.15228	-1.32375e-07	-0.15228	2.40753e-07
-0.14984	1.18134e-07	-0.14984	-1.29079e-07	-0.14984	2.41791e-07
-0.1474	1.20117e-07	-0.1474	-1.25417e-07	-0.1474	2.42859e-07
-0.14496	1.21918e-07	-0.14496	-1.23983e-07	-0.14496	2.44263e-07
-0.14252	1.23627e-07	-0.14252	-1.20077e-07	-0.14252	2.44293e-07
-0.14008	1.2439e-07	-0.14008	-1.18887e-07	-0.14008	2.47253e-07
-0.13763	1.25244e-07	-0.13763	-1.17147e-07	-0.13763	2.48077e-07
-0.13519	1.25641e-07	-0.13519	-1.14004e-07	-0.13519	2.48871e-07
-0.13275	1.27716e-07	-0.13275	-1.11623e-07	-0.13275	2.50458e-07
-0.13031	1.29303e-07	-0.13031	-1.09273e-07	-0.13031	2.51404e-07
-0.12787	1.3031e-07	-0.12787	-1.06954e-07	-0.12787	2.53662e-07
-0.12543	1.31592e-07	-0.12543	-1.0375e-07	-0.12543	2.54517e-07
-0.12299	1.32141e-07	-0.12299	-1.01919e-07	-0.12299	2.55493e-07
-0.12054	1.33942e-07	-0.12054	-1.00454e-07	-0.12054	2.57751e-07
-0.1181	1.34735e-07	-0.1181	-9.68528e-08	-0.1181	2.57446e-07
-0.11566	1.37177e-07	-0.11566	-9.49302e-08	-0.11566	2.58698e-07
-0.11322	1.39313e-07	-0.11322	-9.27635e-08	-0.11322	2.61047e-07
-0.11078	1.40015e-07	-0.11078	-9.11155e-08	-0.11078	2.60773e-07
-0.10834	1.40564e-07	-0.10834	-8.68736e-08	-0.10834	2.63733e-07
-0.1059	1.40808e-07	-0.1059	-8.46763e-08	-0.1059	2.63031e-07
-0.10345	1.41083e-07	-0.10345	-8.17161e-08	-0.10345	2.65564e-07
-0.10101	1.4209e-07	-0.10101	-7.93968e-08	-0.10101	2.65839e-07
-0.09857	1.42609e-07	-0.09857	-7.61009e-08	-0.09857	2.68585e-07
-0.09613	1.44318e-07	-0.09613	-7.39341e-08	-0.09613	2.70111e-07
-0.09369	1.44165e-07	-0.09369	-7.06688e-08	-0.09369	2.70508e-07
-0.09125	1.4447e-07	-0.09125	-6.92344e-08	-0.09125	2.72675e-07
-0.08881	1.45935e-07	-0.08881	-6.7556e-08	-0.08881	2.73315e-07
-0.08636	1.48041e-07	-0.08636	-6.22459e-08	-0.08636	2.75604e-07
-0.08392	1.47614e-07	-0.08392	-6.00792e-08	-0.08392	2.74231e-07
-0.08148	1.49353e-07	-0.08148	-5.76988e-08	-0.08148	2.76672e-07
-0.07904	1.49994e-07	-0.07904	-5.70274e-08	-0.07904	2.77985e-07
-0.0766	1.51825e-07	-0.0766	-5.38841e-08	-0.0766	2.79907e-07
-0.07416	1.52466e-07	-0.07416	-5.18394e-08	-0.07416	2.8006e-07
-0.07172	1.53961e-07	-0.07172	-4.78721e-08	-0.07172	2.81586e-07
-0.06927	1.54816e-07	-0.06927	-4.51866e-08	-0.06927	2.82776e-07
-0.06683	1.56219e-07	-0.06683	-4.25315e-08	-0.06683	2.84851e-07
-0.06439	1.58325e-07	-0.06439	-4.13719e-08	-0.06439	2.86591e-07
-0.06195	1.60065e-07	-0.06195	-3.80455e-08	-0.06195	2.87933e-07
-0.05951	1.6156e-07	-0.05951	-3.55735e-08	-0.05951	2.88177e-07
-0.05707	1.61469e-07	-0.05707	-3.35594e-08	-0.05707	2.89642e-07
-0.05463	1.63391e-07	-0.05463	-2.99278e-08	-0.05463	2.90771e-07
-0.05219	1.64398e-07	-0.05219	-2.77305e-08	-0.05219	2.91779e-07
-0.04974	1.65833e-07	-0.04974	-2.53807e-08	-0.04974	2.93121e-07
-0.0473	1.67389e-07	-0.0473	-2.21458e-08	-0.0473	2.95746e-07
-0.04486	1.66931e-07	-0.04486	-1.95823e-08	-0.04486	2.95135e-07
-0.04242	1.6925e-07	-0.04242	-1.66832e-08	-0.04242	2.97241e-07
-0.03998	1.69891e-07	-0.03998	-1.43943e-08	-0.03998	2.97943e-07
-0.03754	1.70258e-07	-0.03754	-1.04576e-08	-0.03754	2.99561e-07
-0.0351	1.72241e-07	-0.0351	-8.7791e-09	-0.0351	3.00629e-07
-0.03265	1.73401e-07	-0.03265	-8.10772e-09	-0.03265	3.01788e-07
-0.03021	1.74072e-07	-0.03021	-3.31646e-09	-0.03021	3.03772e-07
-0.02777	1.75323e-07	-0.02777	-2.37041e-09	-0.02777	3.0423e-07
-0.02533	1.77399e-07	-0.02533	-1.73145e-10	-0.02533	3.04901e-07
-0.02289	1.79138e-07	-0.02289	5.01484e-09	-0.02289	3.06183e-07
-0.02045	1.79199e-07	-0.02045	7.15107e-09	-0.02045	3.07709e-07
-0.01801	1.79016e-07	-0.01801	8.46333e-09	-0.01801	3.09967e-07
-0.01556	1.8045e-07	-0.01556	1.20339e-08	-0.01556	3.11035e-07
-0.01312	1.80878e-07	-0.01312	1.38649e-08	-0.01312	3.10211e-07
-0.01068	1.83411e-07	-0.01068	1.58791e-08	-0.01068	3.14728e-07
-0.00824	1.84479e-07	-0.00824	2.06093e-08	-0.00824	3.14575e-07
-0.0058	1.85303e-07	-0.0058	2.12197e-08	-0.0058	3.14941e-07
-0.00336	1.86371e-07	-0.00336	2.31423e-08	-0.00336	3.172e-07
-0.000915527	1.84784e-07	-0.000915527	2.64382e-08	-0.000915527	3.17566e-07
0.00153	1.87073e-07	0.00153	2.97036e-08	0.00153	3.20038e-07
0.00397	1.87073e-07	0.00397	3.2145e-08	0.00397	3.20129e-07
0.00641	1.86279e-07	0.00641	3.39455e-08	0.00641	3.21014e-07
0.00885	1.88538e-07	0.00885	3.62038e-08	0.00885	3.23181e-07
0.01129	1.88599e-07	0.01129	3.96523e-08	0.01129	3.2486e-07
0.01373	1.9043e-07	0.01373	4.33754e-08	0.01373	3.24493e-07
0.01617	1.92841e-07	0.01617	4.36196e-08	0.01617	3.27728e-07
0.01862	1.94397e-07	0.01862	4.79836e-08	0.01862	3.28064e-07
0.02106	1.9751e-07	0.02106	4.90212e-08	0.02106	3.29346e-07
0.0235	2.005e-07	0.0235	5.14016e-08	0.0235	3.30292e-07
0.02594	2.01874e-07	0.02594	5.5613e-08	0.02594	3.31482e-07
0.02838	2.02881e-07	0.02838	5.80849e-08	0.02838	3.31879e-07
0.03082	2.04651e-07	0.03082	6.03127e-08	0.03082	3.33984e-07
0.03326	2.0755e-07	0.03326	6.18386e-08	0.03326	3.35327e-07
0.03571	2.08618e-07	0.03571	6.65688e-08	0.03571	3.37219e-07
0.03815	2.08923e-07	0.03815	6.82473e-08	0.03815	3.37921e-07
0.04059	2.11456e-07	0.04059	6.97121e-08	0.04059	3.38318e-07
0.04303	2.11273e-07	0.04303	7.28249e-08	0.04303	3.40515e-07
0.04547	2.12463e-07	0.04547	7.53273e-08	0.04547	3.41492e-07
0.04791	2.14294e-07	0.04791	7.77687e-08	0.04791	3.42316e-07
0.05035	2.16919e-07	0.05035	8.02102e-08	0.05035	3.44452e-07
0.0528	2.17712e-07	0.0528	8.22548e-08	0.0528	3.45673e-07
0.05524	2.19482e-07	0.05524	8.61e-08	0.05524	3.45428e-07
0.05768	2.20459e-07	0.05768	8.77175e-08	0.05768	3.47229e-07
0.06012	2.21436e-07	0.06012	9.04335e-08	0.06012	3.4848e-07
0.06256	2.23083e-07	0.06256	9.37905e-08	0.06256	3.49945e-07
0.065	2.25098e-07	0.065	9.62929e-08	0.065	3.51349e-07
0.06744	2.26837e-07	0.06744	1.0084e-07	0.06744	3.52448e-07
0.06989	2.29004e-07	0.06989	1.01878e-07	0.06989	3.54401e-07
0.07233	2.29828e-07	0.07233	1.04075e-07	0.07233	3.54614e-07
0.07477	2.33002e-07	0.07477	1.07157e-07	0.07477	3.5614e-07
0.07721	2.34192e-07	0.07721	1.0911e-07	0.07721	3.57971e-07
0.07965	2.35138e-07	0.07965	1.12406e-07	0.07965	3.59222e-07
0.08209	2.37091e-07	0.08209	1.14634e-07	0.08209	3.60291e-07
0.08453	2.39288e-07	0.08453	1.16618e-07	0.08453	3.61603e-07
0.08698	2.39655e-07	0.08698	1.19608e-07	0.08698	3.63678e-07
0.08942	2.42371e-07	0.08942	1.23179e-07	0.08942	3.63647e-07
0.09186	2.44232e-07	0.09186	1.27146e-07	0.09186	3.64441e-07
0.0943	2.45239e-07	0.0943	1.29008e-07	0.0943	3.66699e-07
0.09674	2.45117e-07	0.09674	1.31602e-07	0.09674	3.69476e-07
0.09918	2.46185e-07	0.09918	1.34257e-07	0.09918	3.68256e-07
0.10162	2.47253e-07	0.10162	1.37309e-07	0.10162	3.70209e-07
0.10406	2.48779e-07	0.10406	1.39658e-07	0.10406	3.72681e-07
0.10651	2.50946e-07	0.10651	1.4329e-07	0.10651	3.7381e-07
0.10895	2.51648e-07	0.10895	1.45762e-07	0.10895	3.75397e-07
0.11139	2.53632e-07	0.11139	1.48356e-07	0.11139	3.76862e-07
0.11383	2.56226e-07	0.11383	1.5214e-07	0.11383	3.78235e-07
0.11627	2.58759e-07	0.11627	1.54124e-07	0.11627	3.77899e-07
0.11871	2.60529e-07	0.11871	1.57481e-07	0.11871	3.80554e-07
0.12115	2.63275e-07	0.12115	1.60288e-07	0.12115	3.81165e-07
0.1236	2.64526e-07	0.1236	1.63432e-07	0.1236	3.82294e-07
0.12604	2.66907e-07	0.12604	1.66087e-07	0.12604	3.83667e-07
0.12848	2.69318e-07	0.12848	1.70634e-07	0.12848	3.85864e-07
0.13092	2.72095e-07	0.13092	1.72129e-07	0.13092	3.87604e-07
0.13336	2.73956e-07	0.13336	1.76127e-07	0.13336	3.88702e-07
0.1358	2.7774e-07	0.1358	1.77775e-07	0.1358	3.89343e-07
0.13824	2.80609e-07	0.13824	1.82078e-07	0.13824	3.90259e-07
0.14069	2.82318e-07	0.14069	1.84855e-07	0.14069	3.91144e-07
0.14313	2.85278e-07	0.14313	1.87632e-07	0.14313	3.93372e-07
0.14557	2.8714e-07	0.14557	1.90897e-07	0.14557	3.94775e-07
0.14801	2.89032e-07	0.14801	1.95689e-07	0.14801	3.96454e-07
0.15045	2.91382e-07	0.15045	1.97031e-07	0.15045	3.9798e-07
0.15289	2.93884e-07	0.15289	2.01884e-07	0.15289	3.99078e-07
0.15533	2.95959e-07	0.15533	2.04081e-07	0.15533	3.99811e-07
0.15778	2.99988e-07	0.15778	2.07377e-07	0.15778	4.01398e-07
0.16022	3.02338e-07	0.16022	2.10886e-07	0.16022	4.04175e-07
0.16266	3.05115e-07	0.16266	2.13877e-07	0.16266	4.04663e-07
0.1651	3.08411e-07	0.1651	2.16898e-07	0.1651	4.06219e-07
0.16754	3.11554e-07	0.16754	2.20469e-07	0.16754	4.06799e-07
0.16998	3.13263e-07	0.16998	2.23887e-07	0.16998	4.08569e-07
0.17242	3.17444e-07	0.17242	2.27732e-07	0.17242	4.09454e-07
0.17487	3.21014e-07	0.17487	2.32371e-07	0.17487	4.11926e-07
0.17731	3.24432e-07	0.17731	2.36124e-07	0.17731	4.13147e-07
0.17975	3.27423e-07	0.17975	2.3881e-07	0.17975	4.1449e-07
0.18219	3.31055e-07	0.18219	2.42442e-07	0.18219	4.15466e-07
0.18463	3.33435e-07	0.18463	2.47233e-07	0.18463	4.1687e-07
0.18707	3.36517e-07	0.18707	2.50681e-07	0.18707	4.18762e-07
0.18951	3.37738e-07	0.18951	2.53489e-07	0.18951	4.19586e-07
0.19196	3.43292e-07	0.19196	2.56358e-07	0.19196	4.22455e-07
0.1944	3.45276e-07	0.1944	2.6121e-07	0.1944	4.22882e-07
0.19684	3.49091e-07	0.19684	2.65604e-07	0.19684	4.25507e-07
0.19928	3.52081e-07	0.19928	2.68717e-07	0.19928	4.27612e-07
0.20172	3.56567e-07	0.20172	2.71342e-07	0.20172	4.2868e-07
0.20416	3.60229e-07	0.20416	2.7656e-07	0.20416	4.29291e-07
0.2066	3.64502e-07	0.2066	2.78849e-07	0.2066	4.31274e-07
0.20905	3.67371e-07	0.20905	2.83549e-07	0.20905	4.33014e-07
0.21149	3.71002e-07	0.21149	2.87302e-07	0.21149	4.34143e-07
0.21393	3.7323e-07	0.21393	2.92674e-07	0.21393	4.36157e-07
0.21637	3.7796e-07	0.21637	2.95237e-07	0.21637	4.38568e-07
0.21881	3.80615e-07	0.21881	2.98747e-07	0.21881	4.38873e-07
0.22125	3.85223e-07	0.22125	3.0427e-07	0.22125	4.4101e-07
0.22369	3.89252e-07	0.22369	3.08543e-07	0.22369	4.42932e-07
0.22614	3.93707e-07	0.22614	3.12357e-07	0.22614	4.45129e-07
0.22858	3.97552e-07	0.22858	3.15806e-07	0.22858	4.45221e-07
0.23102	4.01703e-07	0.23102	3.20078e-07	0.23102	4.48517e-07
0.23346	4.06891e-07	0.23346	3.24076e-07	0.23346	4.50256e-07
0.2359	4.10797e-07	0.2359	3.28928e-07	0.2359	4.51111e-07
0.23834	4.16107e-07	0.23834	3.30821e-07	0.23834	4.54407e-07
0.24078	4.20044e-07	0.24078	3.36314e-07	0.24078	4.56238e-07
0.24323	4.24438e-07	0.24323	3.40281e-07	0.24323	4.56635e-07
0.24567	4.29932e-07	0.24567	3.43638e-07	0.24567	4.57977e-07
0.24811	4.34845e-07	0.24811	3.4791e-07	0.24811	4.60266e-07
0.25055	4.40857e-07	0.25055	3.52793e-07	0.25055	4.6228e-07
0.25299	4.44763e-07	0.25299	3.57676e-07	0.25299	4.63745e-07
0.25543	4.50409e-07	0.25543	3.63169e-07	0.25543	4.65729e-07
0.25787	4.55872e-07	0.25787	3.67442e-07	0.25787	4.68048e-07
0.26031	4.61639e-07	0.26031	3.70799e-07	0.26031	4.70306e-07
0.26276	4.68018e-07	0.26276	3.74766e-07	0.26276	4.72748e-07
0.2652	4.73206e-07	0.2652	3.80259e-07	0.2652	4.74121e-07
0.26764	4.78363e-07	0.26764	3.84531e-07	0.26764	4.7583e-07
0.27008	4.84375e-07	0.27008	3.89719e-07	0.27008	4.77722e-07
0.27252	4.88068e-07	0.27252	3.94297e-07	0.27252	4.80225e-07
0.27496	4.95392e-07	0.27496	3.9857e-07	0.27496	4.82788e-07
0.2774	5.00458e-07	0.2774	4.03147e-07	0.2774	4.84528e-07
0.27985	5.04974e-07	0.27985	4.0803e-07	0.27985	4.86328e-07
0.28229	5.10193e-07	0.28229	4.13523e-07	0.28229	4.88464e-07
0.28473	5.1532e-07	0.28473	4.17796e-07	0.28473	4.91119e-07
0.28717	5.20416e-07	0.28717	4.23289e-07	0.28717	4.92706e-07
0.28961	5.25513e-07	0.28961	4.2512e-07	0.28961	4.94873e-07
0.29205	5.31586e-07	0.29205	4.31834e-07	0.29205	4.9585e-07
0.29449	5.39276e-07	0.29449	4.37022e-07	0.29449	4.99603e-07
0.29694	5.44647e-07	0.29694	4.40379e-07	0.29694	5.01892e-07
0.29938	5.50476e-07	0.29938	4.47092e-07	0.29938	5.02899e-07
0.30182	5.57007e-07	0.30182	4.50755e-07	0.30182	5.06775e-07
0.30426	5.63812e-07	0.30426	4.57468e-07	0.30426	5.07477e-07
0.3067	5.70618e-07	0.3067	4.6052e-07	0.3067	5.11261e-07
0.30914	5.76385e-07	0.30914	4.65403e-07	0.30914	5.13306e-07
0.31158	5.8252e-07	0.31158	4.71201e-07	0.31158	5.1416e-07
0.31403	5.90637e-07	0.31403	4.74863e-07	0.31403	5.16876e-07
0.31647	5.97656e-07	0.31647	4.80357e-07	0.31647	5.20721e-07
0.31891	6.04675e-07	0.31891	4.85239e-07	0.31891	5.22583e-07
0.32135	6.11877e-07	0.32135	4.88902e-07	0.32135	5.242e-07
0.32379	6.18286e-07	0.32379	4.95005e-07	0.32379	5.27252e-07
0.32623	6.25305e-07	0.32623	4.98362e-07	0.32623	5.28748e-07
0.32867	6.31714e-07	0.32867	5.04466e-07	0.32867	5.31799e-07
0.33112	6.38428e-07	0.33112	5.09348e-07	0.33112	5.34363e-07
0.33356	6.44226e-07	0.33356	5.13316e-07	0.33356	5.36133e-07
0.336	6.51855e-07	0.336	5.18504e-07	0.336	5.37903e-07
0.33844	6.5979e-07	0.33844	5.23692e-07	0.33844	5.41168e-07
0.34088	6.67725e-07	0.34088	5.28269e-07	0.34088	5.43701e-07
0.34332	6.76575e-07	0.34332	5.32847e-07	0.34332	5.46753e-07
0.34576	6.82983e-07	0.34576	5.37425e-07	0.34576	5.48553e-07
0.34821	6.91223e-07	0.34821	5.42002e-07	0.34821	5.51971e-07
0.35065	6.98242e-07	0.35065	5.45054e-07	0.35065	5.53711e-07
0.35309	7.05872e-07	0.35309	5.49632e-07	0.35309	5.56213e-07
0.35553	7.14111e-07	0.35553	5.54209e-07	0.35553	5.59479e-07
0.35797	7.2113e-07	0.35797	5.58482e-07	0.35797	5.62347e-07
0.36041	7.26318e-07	0.36041	5.6489e-07	0.36041	5.64911e-07
0.36285	7.32727e-07	0.36285	5.68552e-07	0.36285	5.65033e-07
0.3653	7.40662e-07	0.3653	5.72215e-07	0.3653	5.70557e-07
0.36774	7.48291e-07	0.36774	5.78013e-07	0.36774	5.71808e-07
0.37018	7.54089e-07	0.37018	5.8137e-07	0.37018	5.74066e-07
0.37262	7.6355e-07	0.37262	5.85337e-07	0.37262	5.76843e-07
0.37506	7.69958e-07	0.37506	5.89304e-07	0.37506	5.79376e-07
0.3775	7.79114e-07	0.3775	5.94187e-07	0.3775	5.82977e-07
0.37994	7.87354e-07	0.37994	5.98765e-07	0.37994	5.86121e-07
0.38239	7.98645e-07	0.38239	6.02122e-07	0.38239	5.90118e-07
0.38483	8.05359e-07	0.38483	6.06089e-07	0.38483	5.91827e-07
0.38727	8.15125e-07	0.38727	6.10667e-07	0.38727	5.94666e-07
0.38971	8.2489e-07	0.38971	6.14634e-07	0.38971	5.98419e-07
0.39215	8.35571e-07	0.39215	6.17686e-07	0.39215	6.00311e-07
0.39459	8.43506e-07	0.39459	6.21653e-07	0.39459	6.03027e-07
0.39703	8.52356e-07	0.39703	6.26841e-07	0.39703	6.05774e-07
0.39948	8.60901e-07	0.39948	6.30503e-07	0.39948	6.09436e-07
0.40192	8.68225e-07	0.40192	6.34776e-07	0.40192	6.11877e-07
0.40436	8.77686e-07	0.40436	6.38133e-07	0.40436	6.14319e-07
0.4068	8.88367e-07	0.4068	6.421e-07	0.4068	6.17065e-07
0.40924	8.95691e-07	0.40924	6.45152e-07	0.40924	6.20117e-07
0.41168	9.05457e-07	0.41168	6.5034e-07	0.41168	6.24084e-07
0.41412	9.14307e-07	0.41412	6.52476e-07	0.41412	6.26831e-07
0.41656	9.24683e-07	0.41656	6.58274e-07	0.41656	6.29578e-07
0.41901	9.34448e-07	0.41901	6.5919e-07	0.41901	6.32935e-07
0.42145	9.43909e-07	0.42145	6.64378e-07	0.42145	6.35376e-07
0.42389	9.52759e-07	0.42389	6.68955e-07	0.42389	6.39648e-07
0.42633	9.6283e-07	0.42633	6.72312e-07	0.42633	6.43921e-07
0.42877	9.71985e-07	0.42877	6.74754e-07	0.42877	6.46973e-07
0.43121	9.8114e-07	0.43121	6.79636e-07	0.43121	6.5033e-07
0.43365	9.8938e-07	0.43365	6.82078e-07	0.43365	6.53687e-07
0.4361	9.97009e-07	0.4361	6.85435e-07	0.4361	6.57959e-07
0.43854	1.00769e-06	0.43854	6.90623e-07	0.43854	6.58569e-07
0.44098	1.01685e-06	0.44098	6.93369e-07	0.44098	6.64063e-07
0.44342	1.026e-06	0.44342	6.97337e-07	0.44342	6.65283e-07
0.44586	1.03638e-06	0.44586	7.00388e-07	0.44586	6.69861e-07
0.4483	1.04523e-06	0.4483	7.04356e-07	0.4483	6.72913e-07
0.45074	1.05621e-06	0.45074	7.07407e-07	0.45074	6.78101e-07
0.45319	1.06323e-06	0.45319	7.10154e-07	0.45319	6.79321e-07
0.45563	1.07391e-06	0.45563	7.15342e-07	0.45563	6.83289e-07
0.45807	1.08215e-06	0.45807	7.17783e-07	0.45807	6.87256e-07
0.46051	1.091e-06	0.46051	7.22056e-07	0.46051	6.92749e-07
0.46295	1.10168e-06	0.46295	7.25108e-07	0.46295	6.95496e-07
0.46539	1.11237e-06	0.46539	7.28465e-07	0.46539	6.99463e-07
0.46783	1.12244e-06	0.46783	7.32432e-07	0.46783	7.02515e-07
0.47028	1.13495e-06	0.47028	7.35789e-07	0.47028	7.06482e-07
0.47272	1.14471e-06	0.47272	7.38535e-07	0.47272	7.09534e-07
0.47516	1.1557e-06	0.47516	7.39756e-07	0.47516	7.14111e-07
0.4776	1.16394e-06	0.4776	7.44944e-07	0.4776	7.17163e-07
0.48004	1.17493e-06	0.48004	7.48606e-07	0.48004	7.22961e-07
0.48248	1.18378e-06	0.48248	7.50132e-07	0.48248	7.23877e-07
0.48492	1.19293e-06	0.48492	7.56236e-07	0.48492	7.2876e-07
0.48737	1.20087e-06	0.48737	7.59592e-07	0.48737	7.33948e-07
0.48981	1.21368e-06	0.48981	7.61424e-07	0.48981	7.37e-07
0.49225	1.22284e-06	0.49225	7.65696e-07	0.49225	7.40662e-07
0.49469	1.23535e-06	0.49469	7.68137e-07	0.49469	7.4707e-07
0.49713	1.24542e-06	0.49713	7.7241e-07	0.49713	7.48901e-07
0.49957	1.25458e-06	0.49957	7.76377e-07	0.49957	7.547e-07
0.50201	1.26465e-06	0.50201	7.79124e-07	0.50201	7.58362e-07
0.50446	1.27747e-06	0.50446	7.83091e-07	0.50446	7.6355e-07
0.5069	1.28845e-06	0.5069	7.86448e-07	0.5069	7.67212e-07
0.50934	1.29883e-06	0.50934	7.91026e-07	0.50934	7.724e-07
0.51178	1.31042e-06	0.51178	7.93162e-07	0.51178	7.77588e-07
0.51422	1.3208e-06	0.51422	7.96214e-07	0.51422	7.81555e-07
0.51666	1.33148e-06	0.51666	8.01096e-07	0.51666	7.86743e-07
0.5191	1.3446e-06	0.5191	8.05064e-07	0.5191	7.901e-07
0.52155	1.35498e-06	0.52155	8.0781e-07	0.52155	7.95593e-07
0.52399	1.36566e-06	0.52399	8.12388e-07	0.52399	8.00476e-07
0.52643	1.37726e-06	0.52643	8.1605e-07	0.52643	8.05664e-07
0.52887	1.39008e-06	0.52887	8.19712e-07	0.52887	8.10242e-07
0.53131	1.40106e-06	0.53131	8.23374e-07	0.53131	8.14514e-07
0.53375	1.41388e-06	0.53375	8.26121e-07	0.53375	8.20313e-07
0.53619	1.42609e-06	0.53619	8.30088e-07	0.53619	8.25806e-07
0.53864	1.43585e-06	0.53864	8.34971e-07	0.53864	8.30383e-07
0.54108	1.44775e-06	0.54108	8.37412e-07	0.54108	8.35876e-07
0.54352	1.45813e-06	0.54352	8.41685e-07	0.54352	8.41064e-07
0.54596	1.47247e-06	0.54596	8.46262e-07	0.54596	8.46252e-07
0.5484	1.48407e-06	0.5484	8.49925e-07	0.5484	8.52661e-07
0.55084	1.49628e-06	0.55084	8.53892e-07	0.55084	8.58154e-07
0.55328	1.50879e-06	0.55328	8.57554e-07	0.55328	8.63647e-07
0.55573	1.52222e-06	0.55573	8.62132e-07	0.55573	8.6853e-07
0.55817	1.53412e-06	0.55817	8.66099e-07	0.55817	8.74329e-07
0.56061	1.54602e-06	0.56061	8.69151e-07	0.56061	8.79822e-07
0.56305	1.56006e-06	0.56305	8.73423e-07	0.56305	8.8562e-07
0.56549	1.57257e-06	0.56549	8.78001e-07	0.56549	8.91724e-07
0.56793	1.58569e-06	0.56793	8.82883e-07	0.56793	8.98743e-07
0.57037	1.59821e-06	0.57037	8.8624e-07	0.57037	9.021e-07
0.57281	1.61102e-06	0.57281	8.90818e-07	0.57281	9.10339e-07
0.57526	1.62384e-06	0.57526	8.95396e-07	0.57526	9.16138e-07
0.5777	1.6391e-06	0.5777	8.99058e-07	0.5777	9.23462e-07
0.58014	1.65009e-06	0.58014	9.0333e-07	0.58014	9.2804e-07
0.58258	1.66565e-06	0.58258	9.07908e-07	0.58258	9.35059e-07
0.58502	1.67755e-06	0.58502	9.1096e-07	0.58502	9.40857e-07
0.58746	1.69189e-06	0.58746	9.15537e-07	0.58746	9.47266e-07
0.5899	1.70532e-06	0.5899	9.18894e-07	0.5899	9.552e-07
0.59235	1.71997e-06	0.59235	9.25303e-07	0.59235	9.59473e-07
0.59479	1.73462e-06	0.59479	9.2866e-07	0.59479	9.67712e-07
0.59723	1.74896e-06	0.59723	9.32322e-07	0.59723	9.75342e-07
0.59967	1.76392e-06	0.59967	9.3812e-07	0.59967	9.8175e-07
0.60211	1.77765e-06	0.60211	9.43613e-07	0.60211	9.89075e-07
0.60455	1.79291e-06	0.60455	9.47581e-07	0.60455	9.94873e-07
0.60699	1.80908e-06	0.60699	9.53074e-07	0.60699	1.00281e-06
0.60944	1.82343e-06	0.60944	9.56126e-07	0.60944	1.00922e-06
0.61188	1.83716e-06	0.61188	9.60398e-07	0.61188	1.01807e-06
0.61432	1.85059e-06	0.61432	9.65891e-07	0.61432	1.02478e-06
0.61676	1.86462e-06	0.61676	9.70164e-07	0.61676	1.03271e-06
0.6192	1.87958e-06	0.6192	9.75047e-07	0.6192	1.04034e-06
0.62164	1.89423e-06	0.62164	9.77793e-07	0.62164	1.04736e-06
0.62408	1.90887e-06	0.62408	9.83592e-07	0.62408	1.0553e-06
0.62653	1.92322e-06	0.62653	9.88474e-07	0.62653	1.06323e-06
0.62897	1.93695e-06	0.62897	9.93662e-07	0.62897	1.07086e-06
0.63141	1.95129e-06	0.63141	9.97935e-07	0.63141	1.07849e-06
0.63385	1.96472e-06	0.63385	1.00251e-06	0.63385	1.08582e-06
0.63629	1.97998e-06	0.63629	1.00923e-06	0.63629	1.09528e-06
0.63873	1.99493e-06	0.63873	1.01319e-06	0.63873	1.10291e-06
0.64117	2.01111e-06	0.64117	1.0193e-06	0.64117	1.11115e-06
0.64362	2.02301e-06	0.64362	1.02387e-06	0.64362	1.11908e-06
0.64606	2.04224e-06	0.64606	1.03028e-06	0.64606	1.12762e-06
0.6485	2.05536e-06	0.6485	1.03669e-06	0.6485	1.13495e-06
0.65094	2.07031e-06	0.65094	1.04096e-06	0.65094	1.14655e-06
0.65338	2.08405e-06	0.65338	1.04646e-06	0.65338	1.15509e-06
0.65582	2.10022e-06	0.65582	1.05317e-06	0.65582	1.16241e-06
0.65826	2.11395e-06	0.65826	1.05775e-06	0.65826	1.17279e-06
0.66071	2.13013e-06	0.66071	1.06355e-06	0.66071	1.18103e-06
0.66315	2.14417e-06	0.66315	1.06843e-06	0.66315	1.18744e-06
0.66559	2.15851e-06	0.66559	1.07545e-06	0.66559	1.19904e-06
0.66803	2.17224e-06	0.66803	1.08033e-06	0.66803	1.20605e-06
0.67047	2.19055e-06	0.67047	1.08766e-06	0.67047	1.21765e-06
0.67291	2.20398e-06	0.67291	1.09498e-06	0.67291	1.22742e-06
0.67535	2.21954e-06	0.67535	1.10139e-06	0.67535	1.23779e-06
0.6778	2.23663e-06	0.6778	1.10566e-06	0.6778	1.24695e-06
0.68024	2.25372e-06	0.68024	1.11115e-06	0.68024	1.25641e-06
0.68268	2.26654e-06	0.68268	1.11726e-06	0.68268	1.26495e-06
0.68512	2.28424e-06	0.68512	1.12458e-06	0.68512	1.27686e-06
0.68756	2.29767e-06	0.68756	1.13099e-06	0.68756	1.28754e-06
0.69	2.3114e-06	0.69	1.13832e-06	0.69	1.29822e-06
0.69244	2.32758e-06	0.69244	1.14472e-06	0.69244	1.30798e-06
0.69489	2.34375e-06	0.69489	1.15205e-06	0.69489	1.31897e-06
0.69733	2.35962e-06	0.69733	1.15907e-06	0.69733	1.32782e-06
0.69977	2.37671e-06	0.69977	1.1667e-06	0.69977	1.33942e-06
0.70221	2.39014e-06	0.70221	1.17219e-06	0.70221	1.3501e-06
0.70465	2.40784e-06	0.70465	1.18104e-06	0.70465	1.36108e-06
0.70709	2.42493e-06	0.70709	1.18684e-06	0.70709	1.37421e-06
0.70953	2.44293e-06	0.70953	1.19599e-06	0.70953	1.38275e-06
0.71198	2.46185e-06	0.71198	1.20423e-06	0.71198	1.39435e-06
0.71442	2.47833e-06	0.71442	1.21125e-06	0.71442	1.40564e-06
0.71686	2.4942e-06	0.71686	1.21919e-06	0.71686	1.41754e-06
0.7193	2.5119e-06	0.7193	1.22804e-06	0.7193	1.42822e-06
0.72174	2.52686e-06	0.72174	1.23628e-06	0.72174	1.44287e-06
0.72418	2.54242e-06	0.72418	1.24391e-06	0.72418	1.45294e-06
0.72662	2.55676e-06	0.72662	1.25337e-06	0.72662	1.46423e-06
0.72906	2.57416e-06	0.72906	1.26161e-06	0.72906	1.47522e-06
0.73151	2.58972e-06	0.73151	1.27137e-06	0.73151	1.49048e-06
0.73395	2.6059e-06	0.73395	1.279e-06	0.73395	1.50085e-06
0.73639	2.62054e-06	0.73639	1.28907e-06	0.73639	1.51276e-06
0.73883	2.63733e-06	0.73883	1.29853e-06	0.73883	1.5274e-06
0.74127	2.65198e-06	0.74127	1.30677e-06	0.74127	1.53961e-06
0.74371	2.66602e-06	0.74371	1.31501e-06	0.74371	1.55151e-06
0.74615	2.68127e-06	0.74615	1.32661e-06	0.74615	1.56647e-06
0.7486	2.69745e-06	0.7486	1.33454e-06	0.7486	1.5799e-06
0.75104	2.71027e-06	0.75104	1.34431e-06	0.75104	1.59363e-06
0.75348	2.72644e-06	0.75348	1.3556e-06	0.75348	1.60797e-06
0.75592	2.74048e-06	0.75592	1.36445e-06	0.75592	1.62201e-06
0.75836	2.75726e-06	0.75836	1.37452e-06	0.75836	1.63605e-06
0.7608	2.77039e-06	0.7608	1.38398e-06	0.7608	1.6507e-06
0.76324	2.78656e-06	0.76324	1.39436e-06	0.76324	1.66687e-06
0.76569	2.79846e-06	0.76569	1.40321e-06	0.76569	1.67816e-06
0.76813	2.81158e-06	0.76813	1.41389e-06	0.76813	1.69586e-06
0.77057	2.82532e-06	0.77057	1.4264e-06	0.77057	1.70929e-06
0.77301	2.83813e-06	0.77301	1.438e-06	0.77301	1.72577e-06
0.77545	2.85248e-06	0.77545	1.44715e-06	0.77545	1.74133e-06
0.77789	2.86865e-06	0.77789	1.45875e-06	0.77789	1.7569e-06
0.78033	2.88025e-06	0.78033	1.47004e-06	0.78033	1.77185e-06
0.78278	2.8949e-06	0.78278	1.48072e-06	0.78278	1.78833e-06
0.78522	2.90924e-06	0.78522	1.49232e-06	0.78522	1.8045e-06
0.78766	2.92419e-06	0.78766	1.50392e-06	0.78766	1.8219e-06
0.7901	2.93732e-06	0.7901	1.51521e-06	0.7901	1.83899e-06
0.79254	2.95105e-06	0.79254	1.5268e-06	0.79254	1.85608e-06
0.79498	2.96387e-06	0.79498	1.5381e-06	0.79498	1.87103e-06
0.79742	2.97546e-06	0.79742	1.54969e-06	0.79742	1.88965e-06
0.79987	2.98462e-06	0.79987	1.56159e-06	0.79987	1.90674e-06
0.80231	2.99683e-06	0.80231	1.57502e-06	0.80231	1.92627e-06
0.80475	3.00751e-06	0.80475	1.5854e-06	0.80475	1.94061e-06
0.80719	3.01941e-06	0.80719	1.59883e-06	0.80719	1.95923e-06
0.80963	3.02948e-06	0.80963	1.61408e-06	0.80963	1.97662e-06
0.81207	3.04199e-06	0.81207	1.62568e-06	0.81207	1.99738e-06
0.81451	3.04962e-06	0.81451	1.63728e-06	0.81451	2.01385e-06
0.81696	3.06183e-06	0.81696	1.65254e-06	0.81696	2.03217e-06
0.8194	3.06793e-06	0.8194	1.66352e-06	0.8194	2.05139e-06
0.82184	3.07831e-06	0.82184	1.67756e-06	0.82184	2.07031e-06
0.82428	3.08563e-06	0.82428	1.69038e-06	0.82428	2.08984e-06
0.82672	3.0957e-06	0.82672	1.70442e-06	0.82672	2.10815e-06
0.82916	3.1015e-06	0.82916	1.71601e-06	0.82916	2.12646e-06
0.8316	3.11066e-06	0.8316	1.7328e-06	0.8316	2.14752e-06
0.83405	3.11646e-06	0.83405	1.74623e-06	0.83405	2.16644e-06
0.83649	3.12256e-06	0.83649	1.76026e-06	0.83649	2.18964e-06
0.83893	3.12561e-06	0.83893	1.77308e-06	0.83893	2.20642e-06
0.84137	3.13202e-06	0.84137	1.78865e-06	0.84137	2.22839e-06
0.84381	3.13629e-06	0.84381	1.80207e-06	0.84381	2.24945e-06
0.84625	3.13934e-06	0.84625	1.81672e-06	0.84625	2.26807e-06
0.84869	3.14606e-06	0.84869	1.83106e-06	0.84869	2.28973e-06
0.85114	3.15033e-06	0.85114	1.84724e-06	0.85114	2.31323e-06
0.85358	3.15338e-06	0.85358	1.86036e-06	0.85358	2.33337e-06
0.85602	3.15765e-06	0.85602	1.87654e-06	0.85602	2.35565e-06
0.85846	3.1601e-06	0.85846	1.89088e-06	0.85846	2.3761e-06
0.8609	3.16254e-06	0.8609	1.90492e-06	0.8609	2.39899e-06
0.86334	3.16254e-06	0.86334	1.91987e-06	0.86334	2.41913e-06
0.86578	3.16254e-06	0.86578	1.93666e-06	0.86578	2.44202e-06
0.86823	3.16406e-06	0.86823	1.95191e-06	0.86823	2.46307e-06
0.87067	3.1662e-06	0.87067	1.969e-06	0.87067	2.48749e-06
0.87311	3.16589e-06	0.87311	1.98274e-06	0.87311	2.50824e-06
0.87555	3.16711e-06	0.87555	1.99891e-06	0.87555	2.53296e-06
0.87799	3.16772e-06	0.87799	2.01417e-06	0.87799	2.55463e-06
0.88043	3.1662e-06	0.88043	2.02943e-06	0.88043	2.57996e-06
0.88287	3.16467e-06	0.88287	2.04591e-06	0.88287	2.60101e-06
0.88531	3.16376e-06	0.88531	2.06361e-06	0.88531	2.62421e-06
0.88776	3.16345e-06	0.88776	2.07826e-06	0.88776	2.64648e-06
0.8902	3.16437e-06	0.8902	2.09626e-06	0.8902	2.67303e-06
0.89264	3.16437e-06	0.89264	2.11213e-06	0.89264	2.69501e-06
0.89508	3.16376e-06	0.89508	2.13014e-06	0.89508	2.71973e-06
0.89752	3.16162e-06	0.89752	2.14479e-06	0.89752	2.74231e-06
0.89996	3.16071e-06	0.89996	2.16401e-06	0.89996	2.76855e-06
0.9024	3.15826e-06	0.9024	2.17927e-06	0.9024	2.79266e-06
0.90485	3.15674e-06	0.90485	2.19697e-06	0.90485	2.8183e-06
0.90729	3.15613e-06	0.90729	2.21314e-06	0.90729	2.84485e-06
0.90973	3.15796e-06	0.90973	2.23023e-06	0.90973	2.87048e-06
0.91217	3.15399e-06	0.91217	2.24732e-06	0.91217	2.89337e-06
0.91461	3.15338e-06	0.91461	2.26686e-06	0.91461	2.92145e-06
0.91705	3.14941e-06	0.91705	2.28334e-06	0.91705	2.94525e-06
0.91949	3.1485e-06	0.91949	2.30348e-06	0.91949	2.97241e-06
0.92194	3.14392e-06	0.92194	2.31874e-06	0.92194	2.99866e-06
0.92438	3.1424e-06	0.92438	2.33918e-06	0.92438	3.0249e-06
0.92682	3.13934e-06	0.92682	2.3578e-06	0.92682	3.05359e-06
0.92926	3.13873e-06	0.92926	2.37733e-06	0.92926	3.08075e-06
0.9317	3.13416e-06	0.9317	2.39503e-06	0.9317	3.10638e-06
0.93414	3.12927e-06	0.93414	2.41578e-06	0.93414	3.13599e-06
0.93658	3.12378e-06	0.93658	2.43318e-06	0.93658	3.15948e-06
0.93903	3.12561e-06	0.93903	2.45393e-06	0.93903	3.19e-06
0.94147	3.12439e-06	0.94147	2.47193e-06	0.94147	3.21625e-06
0.94391	3.12347e-06	0.94391	2.48719e-06	0.94391	3.24646e-06
0.94635	3.12195e-06	0.94635	2.50611e-06	0.94635	3.27423e-06
0.94879	3.12164e-06	0.94879	2.52626e-06	0.94879	3.30475e-06
0.95123	3.11859e-06	0.95123	2.54334e-06	0.95123	3.33282e-06
0.95367	3.11707e-06	0.95367	2.56074e-06	0.95367	3.36456e-06
0.95612	3.11218e-06	0.95612	2.57844e-06	0.95612	3.39294e-06
0.95856	3.11035e-06	0.95856	2.59828e-06	0.95856	3.42346e-06
0.961	3.10577e-06	0.961	2.61537e-06	0.961	3.45123e-06
0.96344	3.10455e-06	0.96344	2.63398e-06	0.96344	3.48114e-06
0.96588	3.10059e-06	0.96588	2.65351e-06	0.96588	3.51135e-06
0.96832	3.10242e-06	0.96832	2.67457e-06	0.96832	3.54523e-06
0.97076	3.09967e-06	0.97076	2.69136e-06	0.97076	3.57544e-06
0.97321	3.10089e-06	0.97321	2.71333e-06	0.97321	3.6084e-06
0.97565	3.10089e-06	0.97565	2.72981e-06	0.97565	3.64014e-06
0.97809	3.09937e-06	0.97809	2.74873e-06	0.97809	3.67004e-06
0.98053	3.09662e-06	0.98053	2.76643e-06	0.98053	3.703e-06
0.98297	3.09326e-06	0.98297	2.78382e-06	0.98297	3.73505e-06
0.98541	3.09174e-06	0.98541	2.80397e-06	0.98541	3.76862e-06
0.98785	3.08777e-06	0.98785	2.82411e-06	0.98785	3.80493e-06
0.9903	3.08655e-06	0.9903	2.84303e-06	0.9903	3.83484e-06
0.99274	3.08716e-06	0.99274	2.86378e-06	0.99274	3.87238e-06
0.99518	3.08655e-06	0.99518	2.88178e-06	0.99518	3.90442e-06
0.99762	3.08624e-06	0.99762	2.90132e-06	0.99762	3.94165e-06
1.00006	3.08472e-06	1.00006	2.91871e-06	1.00006	3.97522e-06
1.0025	3.08197e-06	1.0025	2.93824e-06	1.0025	4.01123e-06
1.00494	3.07831e-06	1.00494	2.95869e-06	1.00494	4.04724e-06
1.00739	3.07617e-06	1.00739	2.97975e-06	1.00739	4.08691e-06
1.00983	3.07648e-06	1.00983	2.99775e-06	1.00983	4.12048e-06
1.01227	3.07648e-06	1.01227	3.0185e-06	1.01227	4.15955e-06
1.01471	3.078e-06	1.01471	3.03651e-06	1.01471	4.19617e-06
1.01715	3.07861e-06	1.01715	3.05818e-06	1.01715	4.2334e-06
1.01959	3.0777e-06	1.01959	3.07527e-06	1.01959	4.27155e-06
1.02203	3.07617e-06	1.02203	3.0948e-06	1.02203	4.31091e-06
1.02448	3.07648e-06	1.02448	3.11402e-06	1.02448	4.34753e-06
1.02692	3.07648e-06	1.02692	3.1363e-06	1.02692	4.38995e-06
1.02936	3.07831e-06	1.02936	3.15583e-06	1.02936	4.42993e-06
1.0318	3.08105e-06	1.0318	3.17597e-06	1.0318	4.47418e-06
1.03424	3.08105e-06	1.03424	3.19642e-06	1.03424	4.51172e-06
1.03668	3.08533e-06	1.03668	3.21748e-06	1.03668	4.55505e-06
1.03912	3.08655e-06	1.03912	3.23579e-06	1.03912	4.59717e-06
1.04156	3.08807e-06	1.04156	3.25563e-06	1.04156	4.63867e-06
1.04401	3.09113e-06	1.04401	3.27577e-06	1.04401	4.68292e-06
1.04645	3.09082e-06	1.04645	3.29804e-06	1.04645	4.73022e-06
1.04889	3.09174e-06	1.04889	3.31605e-06	1.04889	4.77173e-06
1.05133	3.09326e-06	1.05133	3.33772e-06	1.05133	4.82025e-06
1.05377	3.09357e-06	1.05377	3.35542e-06	1.05377	4.86145e-06
1.05621	3.09418e-06	1.05621	3.3777e-06	1.05621	4.91089e-06
1.05865	3.09479e-06	1.05865	3.3954e-06	1.05865	4.95667e-06
1.0611	3.09662e-06	1.0611	3.41859e-06	1.0611	5.00427e-06
1.06354	3.09753e-06	1.06354	3.43751e-06	1.06354	5.05096e-06
1.06598	3.09937e-06	1.06598	3.46162e-06	1.06598	5.10498e-06
1.06842	3.10242e-06	1.06842	3.48054e-06	1.06842	5.14954e-06
1.07086	3.10638e-06	1.07086	3.50251e-06	1.07086	5.19958e-06
1.0733	3.10883e-06	1.0733	3.52357e-06	1.0733	5.24933e-06
1.07574	3.1131e-06	1.07574	3.54676e-06	1.07574	5.30151e-06
1.07819	3.11554e-06	1.07819	3.5666e-06	1.07819	5.35156e-06
1.08063	3.11981e-06	1.08063	3.58827e-06	1.08063	5.40344e-06
1.08307	3.12469e-06	1.08307	3.60902e-06	1.08307	5.45532e-06
1.08551	3.12927e-06	1.08551	3.63313e-06	1.08551	5.50934e-06
1.08795	3.13202e-06	1.08795	3.65571e-06	1.08795	5.56244e-06
1.09039	3.13782e-06	1.09039	3.6789e-06	1.09039	5.61737e-06
1.09283	3.1424e-06	1.09283	3.70088e-06	1.09283	5.66925e-06
1.09528	3.14758e-06	1.09528	3.72407e-06	1.09528	5.7254e-06
1.09772	3.15399e-06	1.09772	3.74635e-06	1.09772	5.78094e-06
1.10016	3.15887e-06	1.10016	3.76924e-06	1.10016	5.83832e-06
1.1026	3.16528e-06	1.1026	3.79457e-06	1.1026	5.89417e-06
1.10504	3.16925e-06	1.10504	3.81928e-06	1.10504	5.95245e-06
1.10748	3.17383e-06	1.10748	3.84156e-06	1.10748	6.00769e-06
1.10992	3.17932e-06	1.10992	3.86598e-06	1.10992	6.073e-06
1.11237	3.18329e-06	1.11237	3.88825e-06	1.11237	6.12793e-06
1.11481	3.19153e-06	1.11481	3.91328e-06	1.11481	6.18896e-06
1.11725	3.19733e-06	1.11725	3.93617e-06	1.11725	6.24695e-06
1.11969	3.20343e-06	1.11969	3.96089e-06	1.11969	6.30798e-06
1.12213	3.21045e-06	1.12213	3.98469e-06	1.12213	6.36597e-06
1.12457	3.21564e-06	1.12457	4.01216e-06	1.12457	6.427e-06
1.12701	3.22144e-06	1.12701	4.03535e-06	1.12701	6.48804e-06
1.12946	3.22693e-06	1.12946	4.06098e-06	1.12946	6.55212e-06
1.1319	3.23273e-06	1.1319	4.0854e-06	1.1319	6.61316e-06
1.13434	3.24127e-06	1.13434	4.11195e-06	1.13434	6.67725e-06
1.13678	3.24738e-06	1.13678	4.13728e-06	1.13678	6.74133e-06
1.13922	3.25592e-06	1.13922	4.16291e-06	1.13922	6.80237e-06
1.14166	3.26385e-06	1.14166	4.18855e-06	1.14166	6.86646e-06
1.1441	3.27209e-06	1.1441	4.21754e-06	1.1441	6.93359e-06
1.14655	3.2785e-06	1.14655	4.24317e-06	1.14655	6.99463e-06
1.14899	3.28674e-06	1.14899	4.27125e-06	1.14899	7.06177e-06
1.15143	3.29407e-06	1.15143	4.2978e-06	1.15143	7.12585e-06
1.15387	3.30414e-06	1.15387	4.32862e-06	1.15387	7.19604e-06
1.15631	3.30933e-06	1.15631	4.35548e-06	1.15631	7.25708e-06
1.15875	3.32001e-06	1.15875	4.38386e-06	1.15875	7.32422e-06
1.16119	3.32916e-06	1.16119	4.41438e-06	1.16119	7.39136e-06
1.16364	3.33832e-06	1.16364	4.44398e-06	1.16364	7.46155e-06
1.16608	3.3493e-06	1.16608	4.47084e-06	1.16608	7.52869e-06
1.16852	3.3609e-06	1.16852	4.50349e-06	1.16852	7.59888e-06
1.17096	3.37097e-06	1.17096	4.53279e-06	1.17096	7.66602e-06
1.1734	3.38074e-06	1.1734	4.56483e-06	1.1734	7.73621e-06
1.17584	3.3905e-06	1.17584	4.59504e-06	1.17584	7.80334e-06
1.17828	3.40118e-06	1.17828	4.62709e-06	1.17828	7.87354e-06
1.18073	3.41339e-06	1.18073	4.65913e-06	1.18073	7.94373e-06
1.18317	3.4256e-06	1.18317	4.69239e-06	1.18317	8.01697e-06
1.18561	3.43231e-06	1.18561	4.72627e-06	1.18561	8.08411e-06
1.18805	3.44421e-06	1.18805	4.7577e-06	1.18805	8.15735e-06
1.19049	3.45459e-06	1.19049	4.79127e-06	1.19049	8.22754e-06
1.19293	3.46527e-06	1.19293	4.82484e-06	1.19293	8.30078e-06
1.19537	3.47443e-06	1.19537	4.85932e-06	1.19537	8.37097e-06
1.19781	3.48755e-06	1.19781	4.89259e-06	1.19781	8.44421e-06
1.20026	3.49854e-06	1.20026	4.9286e-06	1.20026	8.51746e-06
1.2027	3.51044e-06	1.2027	4.96583e-06	1.2027	8.59375e-06
1.20514	3.52142e-06	1.20514	5.00062e-06	1.20514	8.66394e-06
1.20758	3.53455e-06	1.20758	5.03846e-06	1.20758	8.74023e-06
1.21002	3.54462e-06	1.21002	5.07386e-06	1.21002	8.81348e-06
1.21246	3.5556e-06	1.21246	5.11109e-06	1.21246	8.88977e-06
1.2149	3.56659e-06	1.2149	5.1471e-06	1.2149	8.96301e-06
1.21735	3.57727e-06	1.21735	5.18678e-06	1.21735	9.03931e-06
1.21979	3.59192e-06	1.21979	5.22462e-06	1.21979	9.1156e-06
1.22223	3.60626e-06	1.22223	5.26338e-06	1.22223	9.19495e-06
1.22467	3.62091e-06	1.22467	5.30213e-06	1.22467	9.27124e-06
1.22711	3.638e-06	1.22711	5.34333e-06	1.22711	9.35059e-06
1.22955	3.65234e-06	1.22955	5.38178e-06	1.22955	9.42688e-06
1.23199	3.67035e-06	1.23199	5.42329e-06	1.23199	9.50928e-06
1.23444	3.68622e-06	1.23444	5.46296e-06	1.23444	9.58557e-06
1.23688	3.703e-06	1.23688	5.50508e-06	1.23688	9.66797e-06
1.23932	3.71765e-06	1.23932	5.54475e-06	1.23932	9.74731e-06
1.24176	3.7326e-06	1.24176	5.58961e-06	1.24176	9.82971e-06
1.2442	3.74847e-06	1.2442	5.62928e-06	1.2442	9.90601e-06
1.24664	3.76648e-06	1.24664	5.67292e-06	1.24664	9.99146e-06
1.24908	3.78113e-06	1.24908	5.71504e-06	1.24908	1.00739e-05
1.25153	3.79761e-06	1.25153	5.7602e-06	1.25153	1.01532e-05
1.25397	3.81622e-06	1.25397	5.80293e-06	1.25397	1.02325e-05
1.25641	3.83545e-06	1.25641	5.8487e-06	1.25641	1.03149e-05
1.25885	3.85284e-06	1.25885	5.89448e-06	1.25885	1.04004e-05
1.26129	3.87207e-06	1.26129	5.94026e-06	1.26129	1.04858e-05
1.26373	3.89008e-06	1.26373	5.98603e-06	1.26373	1.05713e-05
1.26617	3.90869e-06	1.26617	6.03181e-06	1.26617	1.06598e-05
1.26862	3.927e-06	1.26862	6.07759e-06	1.26862	1.07422e-05
1.27106	3.94928e-06	1.27106	6.12641e-06	1.27106	1.08307e-05
1.2735	3.96912e-06	1.2735	6.17524e-06	1.2735	1.09131e-05
1.27594	3.98804e-06	1.27594	6.22102e-06	1.27594	1.10016e-05
1.27838	4.01154e-06	1.27838	6.26985e-06	1.27838	1.10901e-05
1.28082	4.03351e-06	1.28082	6.31867e-06	1.28082	1.11816e-05
1.28326	4.05487e-06	1.28326	6.3675e-06	1.28326	1.12701e-05
1.28571	4.08051e-06	1.28571	6.41938e-06	1.28571	1.13586e-05
1.28815	4.10522e-06	1.28815	6.46821e-06	1.28815	1.14502e-05
1.29059	4.12933e-06	1.29059	6.52009e-06	1.29059	1.15417e-05
1.29303	4.15344e-06	1.29303	6.56892e-06	1.29303	1.16302e-05
1.29547	4.17755e-06	1.29547	6.6208e-06	1.29547	1.17188e-05
1.29791	4.20685e-06	1.29791	6.67268e-06	1.29791	1.18103e-05
1.30035	4.23523e-06	1.30035	6.72761e-06	1.30035	1.19049e-05
1.3028	4.26178e-06	1.3028	6.77949e-06	1.3028	1.19934e-05
1.30524	4.29077e-06	1.30524	6.83137e-06	1.30524	1.20911e-05
1.30768	4.31641e-06	1.30768	6.8863e-06	1.30768	1.21826e-05
1.31012	4.34601e-06	1.31012	6.94123e-06	1.31012	1.22803e-05
1.31256	4.37103e-06	1.31256	6.99311e-06	1.31256	1.23718e-05
1.315	4.40094e-06	1.315	7.04804e-06	1.315	1.24664e-05
1.31744	4.42963e-06	1.31744	7.10603e-06	1.31744	1.25641e-05
1.31989	4.46075e-06	1.31989	7.16401e-06	1.31989	1.26648e-05
1.32233	4.48975e-06	1.32233	7.21894e-06	1.32233	1.27594e-05
1.32477	4.5166e-06	1.32477	7.27693e-06	1.32477	1.28601e-05
1.32721	4.54559e-06	1.32721	7.33186e-06	1.32721	1.29578e-05
1.32965	4.57916e-06	1.32965	7.39289e-06	1.32965	1.30615e-05
1.33209	4.61151e-06	1.33209	7.45088e-06	1.33209	1.31622e-05
1.33453	4.64661e-06	1.33453	7.50886e-06	1.33453	1.32629e-05
1.33698	4.67957e-06	1.33698	7.56684e-06	1.33698	1.33636e-05
1.33942	4.71863e-06	1.33942	7.62788e-06	1.33942	1.34705e-05
1.34186	4.75311e-06	1.34186	7.68586e-06	1.34186	1.35742e-05
1.3443	4.79004e-06	1.3443	7.74995e-06	1.3443	1.3681e-05
1.34674	4.82483e-06	1.34674	7.81098e-06	1.34674	1.37848e-05
1.34918	4.86542e-06	1.34918	7.87507e-06	1.34918	1.38947e-05
1.35162	4.89807e-06	1.35162	7.93305e-06	1.35162	1.39954e-05
1.35406	4.93561e-06	1.35406	7.99714e-06	1.35406	1.41022e-05
1.35651	4.97131e-06	1.35651	8.06123e-06	1.35651	1.4212e-05
1.35895	5.00946e-06	1.35895	8.12532e-06	1.35895	1.43219e-05
1.36139	5.04333e-06	1.36139	8.1894e-06	1.36139	1.44257e-05
1.36383	5.08331e-06	1.36383	8.25654e-06	1.36383	1.45386e-05
1.36627	5.11963e-06	1.36627	8.32063e-06	1.36627	1.46423e-05
1.36871	5.16052e-06	1.36871	8.38471e-06	1.36871	1.47552e-05
1.37115	5.19958e-06	1.37115	8.4549e-06	1.37115	1.48621e-05
1.3736	5.24139e-06	1.3736	8.51899e-06	1.3736	1.49719e-05
1.37604	5.27985e-06	1.37604	8.58918e-06	1.37604	1.50848e-05
1.37848	5.32379e-06	1.37848	8.65937e-06	1.37848	1.51978e-05
1.38092	5.36469e-06	1.38092	8.72651e-06	1.38092	1.53076e-05
1.38336	5.40863e-06	1.38336	8.79975e-06	1.38336	1.54266e-05
1.3858	5.45013e-06	1.3858	8.86994e-06	1.3858	1.55396e-05
1.38824	5.49683e-06	1.38824	8.94319e-06	1.38824	1.56555e-05
1.39069	5.53955e-06	1.39069	9.01338e-06	1.39069	1.57684e-05
1.39313	5.58563e-06	1.39313	9.08662e-06	1.39313	1.58875e-05
1.39557	5.63049e-06	1.39557	9.15986e-06	1.39557	1.60065e-05
1.39801	5.67993e-06	1.39801	9.23615e-06	1.39801	1.61285e-05
1.40045	5.72632e-06	1.40045	9.30635e-06	1.40045	1.62445e-05
1.40289	5.77423e-06	1.40289	9.38569e-06	1.40289	1.63666e-05
1.40533	5.81879e-06	1.40533	9.45893e-06	1.40533	1.64856e-05
1.40778	5.86639e-06	1.40778	9.53828e-06	1.40778	1.66077e-05
1.41022	5.91797e-06	1.41022	9.61457e-06	1.41022	1.67297e-05
1.41266	5.9668e-06	1.41266	9.69087e-06	1.41266	1.68549e-05
1.4151	6.01532e-06	1.4151	9.77021e-06	1.4151	1.698e-05
1.41754	6.06995e-06	1.41754	9.85261e-06	1.41754	1.71082e-05
1.41998	6.11877e-06	1.41998	9.9289e-06	1.41998	1.72333e-05
1.42242	6.17371e-06	1.42242	1.00113e-05	1.42242	1.73645e-05
1.42487	6.22253e-06	1.42487	1.00906e-05	1.42487	1.74896e-05
1.42731	6.27747e-06	1.42731	1.0173e-05	1.42731	1.76239e-05
1.42975	6.32935e-06	1.42975	1.02524e-05	1.42975	1.7749e-05
1.43219	6.38428e-06	1.43219	1.03378e-05	1.43219	1.78833e-05
1.43463	6.43616e-06	1.43463	1.04202e-05	1.43463	1.80176e-05
1.43707	6.49109e-06	1.43707	1.05087e-05	1.43707	1.81549e-05
1.43951	6.54297e-06	1.43951	1.05911e-05	1.43951	1.82892e-05
1.44196	6.5979e-06	1.44196	1.06827e-05	1.44196	1.84296e-05
1.4444	6.64978e-06	1.4444	1.07681e-05	1.4444	1.85608e-05
1.44684	6.70776e-06	1.44684	1.08566e-05	1.44684	1.87042e-05
1.44928	6.7627e-06	1.44928	1.09451e-05	1.44928	1.88416e-05
1.45172	6.81763e-06	1.45172	1.10367e-05	1.45172	1.89819e-05
1.45416	6.87866e-06	1.45416	1.11282e-05	1.45416	1.91284e-05
1.4566	6.93665e-06	1.4566	1.12228e-05	1.4566	1.92749e-05
1.45905	6.99158e-06	1.45905	1.13114e-05	1.45905	1.94153e-05
1.46149	7.05566e-06	1.46149	1.1409e-05	1.46149	1.95648e-05
1.46393	7.1106e-06	1.46393	1.15006e-05	1.46393	1.97052e-05
1.46637	7.17468e-06	1.46637	1.15982e-05	1.46637	1.98608e-05
1.46881	7.23572e-06	1.46881	1.16928e-05	1.46881	2.00073e-05
1.47125	7.2937e-06	1.47125	1.17905e-05	1.47125	2.01569e-05
1.47369	7.35779e-06	1.47369	1.18881e-05	1.47369	2.03094e-05
1.47614	7.42188e-06	1.47614	1.19888e-05	1.47614	2.04681e-05
1.47858	7.48291e-06	1.47858	1.20865e-05	1.47858	2.06207e-05
1.48102	7.55005e-06	1.48102	1.21933e-05	1.48102	2.07794e-05
1.48346	7.61414e-06	1.48346	1.2291e-05	1.48346	2.09351e-05
1.4859	7.68127e-06	1.4859	1.23947e-05	1.4859	2.10938e-05
1.48834	7.74536e-06	1.48834	1.24985e-05	1.48834	2.12524e-05
1.49078	7.81555e-06	1.49078	1.26053e-05	1.49078	2.14111e-05
1.49323	7.88269e-06	1.49323	1.27121e-05	1.49323	2.15759e-05
1.49567	7.95593e-06	1.49567	1.2822e-05	1.49567	2.17438e-05
1.49811	8.02307e-06	1.49811	1.29288e-05	1.49811	2.19055e-05
1.50055	8.09937e-06	1.50055	1.30386e-05	1.50055	2.20764e-05

## Sheet: Figure 4 (c)
0.96388	-1.04059e-06	0.79188	3.60178e-06		0	0.085	0.085
0.97388	-1.12604e-06	0.80188	1.2855e-06		10	2.584	0.158
0.98388	-1.17487e-06	0.81188	8.15524e-07		20	2.751	0.283
0.99388	-1.16877e-06	0.82188	5.80539e-07		30	2.929	0.433
1.00388	-1.19623e-06	0.83188	4.27951e-07		40	3.039	0.566
1.01388	-1.19165e-06	0.84188	3.09543e-07		50	3.094	0.698
1.02388	-1.2121e-06	0.85188	2.21347e-07		60	3.277	0.797
1.03388	-1.19379e-06	0.86188	1.53293e-07
1.04388	-1.21119e-06	0.87188	9.56146e-08
1.05388	-1.19226e-06	0.88188	4.89228e-08
1.06388	-1.07984e-06	0.89188	1.35593e-07
1.07388	-1.05866e-06	0.90188	1.01413e-07
1.08388	-1.07709e-06	0.91188	6.78436e-08
1.09388	-1.05674e-06	0.92188	4.15985e-08
1.10388	-1.07328e-06	0.93188	1.35224e-08
1.11388	-1.05317e-06	0.94188	-6.92442e-09
1.12388	-1.07102e-06	0.95188	-2.92022e-08
1.13388	-1.04947e-06	0.96188	-4.59869e-08
1.14388	-1.0673e-06	0.97188	-6.61285e-08
1.15388	-1.04609e-06	0.98188	-8.13873e-08
1.16388	-1.0644e-06	0.99188	-9.60357e-08
1.17388	-1.04364e-06	1.00188	-1.10379e-07
1.18388	-1.05844e-06	1.01188	-1.25027e-07
1.19388	-1.03943e-06	1.02188	-1.39066e-07
1.20388	-1.05707e-06	1.03188	-1.51578e-07
1.21388	-1.03745e-06	1.04188	-1.62564e-07
1.22388	-1.05436e-06	1.05188	-1.7294e-07
1.23388	-1.03284e-06	1.06188	-1.824e-07
1.24388	-1.05191e-06	1.07188	-1.93082e-07
1.25388	-1.02964e-06	1.08188	-1.99185e-07
1.26388	-1.04825e-06	1.09188	-2.11697e-07
1.27388	-1.02533e-06	1.10188	-2.19022e-07
1.28388	-1.04435e-06	1.11188	-2.29092e-07
1.29388	-1.02485e-06	1.12188	-2.33365e-07
1.30388	-1.04251e-06	1.13188	-2.42825e-07
1.31388	-1.02222e-06	1.14188	-2.45267e-07
1.32388	-1.03949e-06	1.15188	-2.55948e-07
1.33388	-1.01896e-06	1.16188	-2.59305e-07
1.34388	-1.0358e-06	1.17188	-2.69376e-07
1.35388	-1.01505e-06	1.18188	-2.72733e-07
1.36388	-1.03458e-06	1.19188	-2.78531e-07
1.37388	-1.01444e-06	1.20188	-2.8616e-07
1.38388	-1.0308e-06	1.21188	-2.92569e-07
1.39388	-1.0113e-06	1.22188	-2.95621e-07
1.40388	-1.02887e-06	1.23188	-3.0325e-07
1.41388	-1.00998e-06	1.24188	-3.05081e-07
1.42388	-1.026e-06	1.25188	-3.13321e-07
1.43388	-1.00562e-06	1.26188	-3.15762e-07
1.44388	-1.0253e-06	1.27188	-3.2095e-07
1.45388	-1.00501e-06	1.28188	-3.25223e-07
1.46388	-1.02237e-06	1.29188	-3.298e-07
1.47388	-1.00229e-06	1.30188	-3.31631e-07
1.48388	-1.02088e-06	1.31188	-3.37735e-07
1.49388	-9.9918e-07	1.32188	-3.39261e-07
1.50388	-1.01804e-06	1.33188	-3.45364e-07
1.51388	-9.97501e-07	1.34188	-3.47195e-07
1.52388	-1.01722e-06	1.35188	-3.53299e-07
1.53388	-9.97349e-07	1.36188	-3.56046e-07
1.54388	-1.01422e-06	1.37188	-3.62149e-07
1.55388	-9.94144e-07	1.38188	-3.62454e-07
1.56388	-1.01154e-06	1.39188	-3.68558e-07
1.57388	-9.91123e-07	1.40188	-3.71609e-07
1.58388	-1.01136e-06	1.41188	-3.74356e-07
1.59388	-9.88499e-07	1.42188	-3.79239e-07
1.60388	-1.00733e-06	1.43188	-3.84122e-07
1.61388	-9.87125e-07	1.44188	-3.84732e-07
1.62388	-1.0055e-06	1.45188	-3.89004e-07
1.63388	-9.87125e-07	1.46188	-3.87784e-07
1.64388	-1.00467e-06	1.47188	-3.93582e-07
1.65388	-9.83707e-07	1.48188	-3.96634e-07
1.66388	-1.0026e-06	1.49188	-3.97855e-07
1.67388	-9.83433e-07	1.50188	-3.9877e-07
1.68388	-1.00156e-06	1.51188	-4.04568e-07
1.69388	-9.8267e-07	1.52188	-4.02432e-07
1.70388	-9.99729e-07	1.53188	-4.0701e-07
1.71388	-9.79313e-07	1.54188	-4.06705e-07
1.72388	-9.98112e-07	1.55188	-4.11588e-07
1.73388	-9.78153e-07	1.56188	-4.10977e-07
1.74388	-9.95701e-07	1.57188	-4.12808e-07
1.75388	-9.77116e-07	1.58188	-4.1525e-07
1.76388	-9.94175e-07	1.59188	-4.17081e-07
1.77388	-9.74552e-07	1.60188	-4.17996e-07
1.78388	-9.95182e-07	1.61188	-4.22574e-07
1.79388	-9.7443e-07	1.62188	-4.22574e-07
1.80388	-9.90421e-07	1.63188	-4.24405e-07
1.81388	-9.72568e-07	1.64188	-4.23184e-07
1.82388	-9.89872e-07	1.65188	-4.28983e-07
1.83388	-9.69517e-07	1.66188	-4.30508e-07
1.84388	-9.88834e-07	1.67188	-4.32339e-07
1.85388	-9.67503e-07	1.68188	-4.3356e-07
1.86388	-9.8856e-07	1.69188	-4.36002e-07
1.87388	-9.67533e-07	1.70188	-4.35696e-07
1.88388	-9.86698e-07	1.71188	-4.40274e-07
1.89388	-9.64237e-07	1.72188	-4.38748e-07
1.90388	-9.86027e-07	1.73188	-4.42715e-07
1.91388	-9.64573e-07	1.74188	-4.40884e-07
1.92388	-9.83311e-07	1.75188	-4.43936e-07
1.93388	-9.6442e-07	1.76188	-4.45767e-07
1.94388	-9.83341e-07	1.77188	-4.45767e-07
1.95388	-9.62955e-07	1.78188	-4.46072e-07
1.96388	-9.81266e-07	1.79188	-4.47903e-07
1.97388	-9.60239e-07	1.80188	-4.48514e-07
1.98388	-9.78672e-07	1.81188	-4.48514e-07
1.99388	-9.59629e-07	1.82188	-4.51566e-07
2.00388	-9.78794e-07	1.83188	-4.53702e-07
2.01388	-9.5853e-07	1.84188	-4.51871e-07
2.02388	-9.77421e-07	1.85188	-4.56754e-07
2.03388	-9.58469e-07	1.86188	-4.55533e-07
2.04388	-9.75132e-07	1.87188	-4.56754e-07
2.05388	-9.56181e-07	1.88188	-4.56448e-07
2.06388	-9.74277e-07	1.89188	-4.57974e-07
2.07388	-9.55509e-07	1.90188	-4.58585e-07
2.08388	-9.7382e-07	1.91188	-4.61026e-07
2.09388	-9.54227e-07	1.92188	-4.59805e-07
2.10388	-9.71836e-07	1.93188	-4.64993e-07
2.11388	-9.51298e-07	1.94188	-4.62552e-07
2.12388	-9.71989e-07	1.95188	-4.66519e-07
2.13388	-9.51298e-07	1.96188	-4.63773e-07
2.14388	-9.70005e-07	1.97188	-4.67129e-07
2.15388	-9.49528e-07	1.98188	-4.65604e-07
2.16388	-9.68845e-07	1.99188	-4.6835e-07
2.17388	-9.47239e-07	2.00188	-4.69876e-07
2.18388	-9.67472e-07	2.01188	-4.72317e-07
2.19388	-9.47819e-07	2.02188	-4.71707e-07
2.20388	-9.68235e-07	2.03188	-4.74759e-07
2.21388	-9.46506e-07	2.04188	-4.72317e-07
2.22388	-9.65641e-07	2.05188	-4.76285e-07
2.23388	-9.46629e-07	2.06188	-4.73233e-07
2.24388	-9.65885e-07	2.07188	-4.78421e-07
2.25388	-9.44889e-07	2.08188	-4.75064e-07
2.26388	-9.63444e-07	2.09188	-4.79947e-07
2.27388	-9.44035e-07	2.10188	-4.772e-07
2.28388	-9.62711e-07	2.11188	-4.78726e-07
2.29388	-9.42295e-07	2.12188	-4.79337e-07
2.30388	-9.59446e-07	2.13188	-4.82388e-07
2.31388	-9.41776e-07	2.14188	-4.81168e-07
2.32388	-9.59324e-07	2.15188	-4.82693e-07
2.33388	-9.40983e-07	2.16188	-4.83304e-07
2.34388	-9.59995e-07	2.17188	-4.8605e-07
2.35388	-9.37809e-07	2.18188	-4.83914e-07
2.36388	-9.58134e-07	2.19188	-4.88492e-07
2.37388	-9.38541e-07	2.20188	-4.88492e-07
2.38388	-9.56638e-07	2.21188	-4.89102e-07
2.39388	-9.38145e-07	2.22188	-4.88492e-07
2.40388	-9.5731e-07	2.23188	-4.93069e-07
2.41388	-9.36924e-07	2.24188	-4.90628e-07
2.42388	-9.55784e-07	2.25188	-4.96121e-07
2.43388	-9.35062e-07	2.26188	-4.9429e-07
2.44388	-9.53617e-07	2.27188	-4.98257e-07
2.45388	-9.36405e-07	2.28188	-4.949e-07
2.46388	-9.53068e-07	2.29188	-5.00088e-07
2.47388	-9.33292e-07	2.30188	-4.99783e-07
2.48388	-9.54014e-07	2.31188	-5.01614e-07
2.49388	-9.33079e-07	2.32188	-5.00394e-07
2.50388	-9.52396e-07	2.33188	-5.04056e-07
2.51388	-9.31583e-07	2.34188	-5.03751e-07
2.52388	-9.52549e-07	2.35188	-5.04056e-07
2.53388	-9.31736e-07	2.36188	-5.08328e-07
2.54388	-9.49833e-07	2.37188	-5.08633e-07
2.55388	-9.32194e-07	2.38188	-5.09854e-07
2.56388	-9.50565e-07	2.39188	-5.12296e-07
2.57388	-9.28806e-07	2.40188	-5.11685e-07
2.58388	-9.50077e-07	2.41188	-5.14432e-07
2.59388	-9.28867e-07	2.42188	-5.12601e-07
2.60388	-9.49284e-07	2.43188	-5.16873e-07
2.61388	-9.28776e-07	2.44188	-5.15652e-07
2.62388	-9.47086e-07	2.45188	-5.17789e-07
2.63388	-9.28928e-07	2.46188	-5.15347e-07
2.64388	-9.46568e-07	2.47188	-5.1962e-07
2.65388	-9.28349e-07	2.48188	-5.17789e-07
2.66388	-9.46415e-07	2.49188	-5.22671e-07
2.67388	-9.25632e-07	2.50188	-5.17483e-07
2.68388	-9.45805e-07	2.51188	-5.21451e-07
2.69388	-9.25602e-07	2.52188	-5.1962e-07
2.70388	-9.45347e-07	2.53188	-5.18704e-07
2.71388	-9.26517e-07	2.54188	-5.18094e-07
2.72388	-9.46354e-07	2.55188	-5.18704e-07
2.73388	-9.24656e-07	2.56188	-5.17483e-07
2.74388	-9.43851e-07	2.57188	-5.19315e-07
2.75388	-9.25846e-07	2.58188	-5.17483e-07
2.76388	-9.46171e-07	2.59188	-5.18094e-07
2.77388	-9.25846e-07	2.60188	-5.16568e-07
2.78388	-9.43516e-07	2.61188	-5.15347e-07
2.79388	-9.23588e-07	2.62188	-5.13211e-07
2.80388	-9.42448e-07	2.63188	-5.15652e-07
2.81388	-9.23038e-07	2.64188	-5.13211e-07
2.82388	-9.42692e-07	2.65188	-5.14432e-07
2.83388	-9.24747e-07	2.66188	-5.11685e-07
2.84388	-9.41654e-07	2.67188	-5.1199e-07
2.85388	-9.22764e-07	2.68188	-5.12296e-07
2.86388	-9.41227e-07	2.69188	-5.13211e-07
2.87388	-9.22306e-07	2.70188	-5.09854e-07
2.88388	-9.4138e-07	2.71188	-5.11685e-07
2.89388	-9.21299e-07	2.72188	-5.11685e-07
2.90388	-9.41166e-07	2.73188	-5.14737e-07
2.91388	-9.20719e-07	2.74188	-5.1138e-07
2.92388	-9.41807e-07	2.75188	-5.11075e-07
2.93388	-9.20322e-07	2.76188	-5.11075e-07
2.94388	-9.41196e-07	2.77188	-5.14432e-07
2.95388	-9.21177e-07	2.78188	-5.12906e-07
2.96388	-9.39701e-07	2.79188	-5.14737e-07
2.97388	-9.21238e-07	2.80188	-5.14127e-07
2.98388	-9.41502e-07	2.81188	-5.16263e-07
2.99388	-9.19254e-07	2.82188	-5.15652e-07
3.00388	-9.39457e-07	2.83188	-5.17789e-07
3.01388	-9.20567e-07	2.84188	-5.17789e-07
3.02388	-9.39762e-07	2.85188	-5.1962e-07
3.03388	-9.19468e-07	2.86188	-5.19009e-07
3.04388	-9.39884e-07	2.87188	-5.2023e-07
3.05388	-9.19712e-07	2.88188	-5.2023e-07
3.06388	-9.38297e-07	2.89188	-5.21451e-07
3.07388	-9.18858e-07	2.90188	-5.22366e-07
3.08388	-9.38663e-07	2.91188	-5.23282e-07
3.09388	-9.19743e-07	2.92188	-5.22366e-07
3.10388	-9.38724e-07	2.93188	-5.24197e-07
3.11388	-9.18827e-07	2.94188	-5.21756e-07
3.12388	-9.37473e-07	2.95188	-5.26028e-07
3.13388	-9.17606e-07	2.96188	-5.25113e-07
3.14388	-9.35612e-07	2.97188	-5.26639e-07
3.15388	-9.16843e-07	2.98188	-5.25723e-07
3.16388	-9.36802e-07	2.99188	-5.27859e-07
3.17388	-9.17423e-07	3.00188	-5.26028e-07
3.18388	-9.36558e-07	3.01188	-5.29385e-07
3.19388	-9.18308e-07	3.02188	-5.26334e-07
3.20388	-9.35978e-07	3.03188	-5.29385e-07
3.21388	-9.17301e-07	3.04188	-5.26639e-07
3.22388	-9.38236e-07	3.05188	-5.27859e-07
3.23388	-9.16782e-07	3.06188	-5.2847e-07
3.24388	-9.36649e-07	3.07188	-5.29996e-07
3.25388	-9.16965e-07	3.08188	-5.30911e-07
3.26388	-9.35368e-07	3.09188	-5.29996e-07
3.27388	-9.16325e-07	3.10188	-5.30606e-07
3.28388	-9.35612e-07	3.11188	-5.32742e-07
3.29388	-9.15684e-07	3.12188	-5.32132e-07
3.30388	-9.35551e-07	3.13188	-5.31522e-07
3.31388	-9.17118e-07	3.14188	-5.32437e-07
3.32388	-9.36192e-07	3.15188	-5.33963e-07
3.33388	-9.16019e-07	3.16188	-5.32132e-07
3.34388	-9.34818e-07	3.17188	-5.34879e-07
3.35388	-9.15775e-07	3.18188	-5.34268e-07
3.36388	-9.35307e-07	3.19188	-5.34268e-07
3.37388	-9.1666e-07	3.20188	-5.34268e-07
3.38388	-9.36314e-07	3.21188	-5.35184e-07
3.39388	-9.15256e-07	3.22188	-5.34268e-07
3.40388	-9.34483e-07	3.23188	-5.3793e-07
3.41388	-9.15104e-07	3.24188	-5.33658e-07
3.42388	-9.32682e-07	3.25188	-5.3671e-07
3.43388	-9.14829e-07	3.26188	-5.34573e-07
3.44388	-9.35825e-07	3.27188	-5.37625e-07
3.45388	-9.14982e-07	3.28188	-5.35184e-07
3.46388	-9.33048e-07	3.29188	-5.37625e-07
3.47388	-9.13975e-07	3.30188	-5.38541e-07
3.48388	-9.3436e-07	3.31188	-5.3732e-07
3.49388	-9.1608e-07	3.32188	-5.36404e-07
3.50388	-9.35001e-07	3.33188	-5.38846e-07
3.51388	-9.15775e-07	3.34188	-5.3793e-07
3.52388	-9.34055e-07	3.35188	-5.39151e-07
3.53388	-9.15684e-07	3.36188	-5.34879e-07
3.54388	-9.33109e-07	3.37188	-5.40372e-07
3.55388	-9.13334e-07	3.38188	-5.38235e-07
3.56388	-9.34452e-07	3.39188	-5.41592e-07
3.57388	-9.14829e-07	3.40188	-5.35489e-07
3.58388	-9.34757e-07	3.41188	-5.41898e-07
3.59388	-9.12693e-07	3.42188	-5.38846e-07
3.60388	-9.34391e-07	3.43188	-5.42203e-07
3.61388	-9.1544e-07	3.44188	-5.39151e-07
3.62388	-9.35703e-07	3.45188	-5.42508e-07
3.63388	-9.14005e-07	3.46188	-5.41898e-07
3.64388	-9.34238e-07	3.47188	-5.44644e-07
3.65388	-9.12418e-07	3.48188	-5.41898e-07
3.66388	-9.34605e-07	3.49188	-5.44949e-07
3.67388	-9.14066e-07	3.50188	-5.45865e-07
3.68388	-9.33537e-07	3.51188	-5.47696e-07
3.69388	-9.14097e-07	3.52188	-5.43729e-07
3.70388	-9.34696e-07	3.53188	-5.47696e-07
3.71388	-9.1309e-07	3.54188	-5.47086e-07
3.72388	-9.33903e-07	3.55188	-5.48306e-07
3.73388	-9.14555e-07	3.56188	-5.46475e-07
3.74388	-9.33201e-07	3.57188	-5.48611e-07
3.75388	-9.14341e-07	3.58188	-5.48611e-07
3.76388	-9.32865e-07	3.59188	-5.50137e-07
3.77388	-9.13029e-07	3.60188	-5.46475e-07
3.78388	-9.33781e-07	3.61188	-5.50442e-07
3.79388	-9.13181e-07	3.62188	-5.47696e-07
3.80388	-9.33811e-07	3.63188	-5.47696e-07
3.81388	-9.14463e-07	3.64188	-5.48001e-07
3.82388	-9.33048e-07	3.65188	-5.47086e-07
3.83388	-9.14524e-07	3.66188	-5.47391e-07
3.84388	-9.32255e-07	3.67188	-5.47086e-07
3.85388	-9.12846e-07	3.68188	-5.44034e-07
3.86388	-9.33659e-07	3.69188	-5.43423e-07
3.87388	-9.14585e-07	3.70188	-5.39761e-07
3.88388	-9.33048e-07	3.71188	-5.44949e-07
3.89388	-9.13029e-07	3.72188	-5.42203e-07
3.90388	-9.32713e-07	3.73188	-5.43423e-07
3.91388	-9.12479e-07	3.74188	-5.39456e-07
3.92388	-9.3433e-07	3.75188	-5.43118e-07
3.93388	-9.14433e-07	3.76188	-5.3793e-07
3.94388	-9.31828e-07	3.77188	-5.40677e-07
3.95388	-9.11472e-07	3.78188	-5.38541e-07
3.96388	-9.34208e-07	3.79188	-5.41898e-07
3.97388	-9.1254e-07	3.80188	-5.35794e-07
3.98388	-9.33353e-07	3.81188	-5.39151e-07
3.99388	-9.14433e-07	3.82188	-5.37625e-07
4.00388	-9.32163e-07	3.83188	-5.37625e-07
4.01388	-9.13761e-07	3.84188	-5.36404e-07
4.02388	-9.32407e-07	3.85188	-5.3732e-07
4.03388	-9.12418e-07	3.86188	-5.3671e-07
4.04388	-9.32499e-07	3.87188	-5.3793e-07
4.05388	-9.14249e-07	3.88188	-5.3732e-07
4.06388	-9.33292e-07	3.89188	-5.40372e-07
4.07388	-9.14158e-07	3.90188	-5.38235e-07
4.08388	-9.34116e-07	3.91188	-5.42203e-07
4.09388	-9.13029e-07	3.92188	-5.39761e-07
4.10388	-9.30973e-07	3.93188	-5.42508e-07
4.11388	-9.12937e-07	3.94188	-5.41592e-07
4.12388	-9.33659e-07	3.95188	-5.45254e-07
4.13388	-9.12968e-07	3.96188	-5.4556e-07
4.14388	-9.33201e-07	3.97188	-5.48611e-07
4.15388	-9.12571e-07	3.98188	-5.46475e-07
4.16388	-9.32499e-07	3.99188	-5.50748e-07
4.17388	-9.11716e-07	4.00188	-5.51053e-07
4.18388	-9.33109e-07	4.01188	-5.5441e-07
4.19388	-9.12205e-07	4.02188	-5.51968e-07
4.20388	-9.33079e-07	4.03188	-5.58682e-07
4.21388	-9.11564e-07	4.04188	-5.55936e-07
4.22388	-9.33445e-07	4.05188	-5.59903e-07
4.23388	-9.12022e-07	4.06188	-5.57156e-07
4.24388	-9.31736e-07	4.07188	-5.61734e-07
4.25388	-9.13883e-07	4.08188	-5.6265e-07
4.26388	-9.32133e-07	4.09188	-5.65396e-07
4.27388	-9.11777e-07	4.10188	-5.64175e-07
4.28388	-9.32163e-07	4.11188	-5.67227e-07
4.29388	-9.11808e-07	4.12188	-5.65396e-07
4.30388	-9.31492e-07	4.13188	-5.70584e-07
4.31388	-9.1312e-07	4.14188	-5.67227e-07
4.32388	-9.31339e-07	4.15188	-5.69974e-07
4.33388	-9.12724e-07	4.16188	-5.69058e-07
4.34388	-9.32713e-07	4.17188	-5.73025e-07
4.35388	-9.11076e-07	4.18188	-5.68753e-07
4.36388	-9.29874e-07	4.19188	-5.715e-07
4.37388	-9.10953e-07	4.20188	-5.70584e-07
4.38388	-9.31736e-07	4.21188	-5.71194e-07
4.39388	-9.11655e-07	4.22188	-5.69058e-07
4.40388	-9.31553e-07	4.23188	-5.70279e-07
4.41388	-9.11076e-07	4.24188	-5.68448e-07
4.42388	-9.30576e-07	4.25188	-5.70889e-07
4.43388	-9.11137e-07	4.26188	-5.67227e-07
4.44388	-9.29691e-07	4.27188	-5.70279e-07
4.45388	-9.11381e-07	4.28188	-5.68448e-07
4.46388	-9.31858e-07	4.29188	-5.69669e-07
4.47388	-9.12296e-07	4.30188	-5.67227e-07
4.48388	-9.31004e-07	4.31188	-5.70584e-07
4.49388	-9.12022e-07	4.32188	-5.68753e-07
4.50388	-9.30058e-07	4.33188	-5.71805e-07
4.51388	-9.11564e-07	4.34188	-5.69974e-07
4.52388	-9.30576e-07	4.35188	-5.71805e-07
4.53388	-9.09367e-07	4.36188	-5.70889e-07
4.54388	-9.31278e-07	4.37188	-5.7211e-07
4.55388	-9.1013e-07	4.38188	-5.73025e-07
4.56388	-9.29417e-07	4.39188	-5.75162e-07
4.57388	-9.10404e-07	4.40188	-5.73331e-07
4.58388	-9.31309e-07	4.41188	-5.74857e-07
4.59388	-9.09031e-07	4.42188	-5.73636e-07
4.60388	-9.30607e-07	4.43188	-5.73636e-07
4.61388	-9.10404e-07	4.44188	-5.73941e-07
4.62388	-9.30058e-07	4.45188	-5.74857e-07
4.63388	-9.10587e-07	4.46188	-5.71805e-07
4.64388	-9.28928e-07	4.47188	-5.73636e-07
4.65388	-9.10831e-07	4.48188	-5.7272e-07
4.66388	-9.30668e-07	4.49188	-5.75467e-07
4.67388	-9.10252e-07	4.50188	-5.69669e-07
4.68388	-9.28776e-07	4.51188	-5.75162e-07
4.69388	-9.09641e-07	4.52188	-5.69363e-07
4.70388	-9.28806e-07	4.53188	-5.715e-07
4.71388	-9.09641e-07	4.54188	-5.70584e-07
4.72388	-9.30424e-07	4.55188	-5.7272e-07
4.73388	-9.07627e-07	4.56188	-5.70279e-07
4.74388	-9.27219e-07	4.57188	-5.73636e-07
4.75388	-9.09794e-07	4.58188	-5.7211e-07
4.76388	-9.29966e-07	4.59188	-5.75467e-07
4.77388	-9.09031e-07	4.60188	-5.7272e-07
4.78388	-9.28562e-07	4.61188	-5.72415e-07
4.79388	-9.09977e-07	4.62188	-5.73636e-07
4.80388	-9.29234e-07	4.63188	-5.73941e-07
4.81388	-9.09275e-07	4.64188	-5.74246e-07
4.82388	-9.28379e-07	4.65188	-5.73941e-07
4.83388	-9.08787e-07	4.66188	-5.73025e-07
4.84388	-9.27677e-07	4.67188	-5.74246e-07
4.85388	-9.08329e-07	4.68188	-5.73941e-07
4.86388	-9.29172e-07	4.69188	-5.75162e-07
4.87388	-9.09489e-07	4.70188	-5.7272e-07
4.88388	-9.28593e-07	4.71188	-5.7272e-07
4.89388	-9.08115e-07	4.72188	-5.7272e-07
4.90388	-9.29111e-07	4.73188	-5.75467e-07
4.91388	-9.08207e-07	4.74188	-5.69974e-07
4.92388	-9.27555e-07	4.75188	-5.73636e-07
4.93388	-9.06467e-07	4.76188	-5.71194e-07
4.94388	-9.2783e-07	4.77188	-5.76382e-07
4.95388	-9.08329e-07	4.78188	-5.69363e-07
4.96388	-9.28043e-07	4.79188	-5.73331e-07
4.97388	-9.06742e-07	4.80188	-5.7211e-07
4.98388	-9.26914e-07	4.81188	-5.73025e-07
4.99388	-9.07017e-07	4.82188	-5.73636e-07
5.00388	-9.27525e-07	4.83188	-5.75772e-07
5.01388	-9.06406e-07	4.84188	-5.73941e-07
5.02388	-9.27555e-07	4.85188	-5.77603e-07
5.03388	-9.06071e-07	4.86188	-5.74551e-07
5.04388	-9.26365e-07	4.87188	-5.77908e-07
5.05388	-9.08146e-07	4.88188	-5.74551e-07
5.06388	-9.26182e-07	4.89188	-5.78213e-07
5.07388	-9.06773e-07	4.90188	-5.77298e-07
5.08388	-9.26487e-07	4.91188	-5.79129e-07
5.09388	-9.07078e-07	4.92188	-5.77603e-07
5.10388	-9.26151e-07	4.93188	-5.80045e-07
5.11388	-9.0723e-07	4.94188	-5.75467e-07
5.12388	-9.24961e-07	4.95188	-5.8035e-07
5.13388	-9.05796e-07	4.96188	-5.79434e-07
5.14388	-9.25327e-07	4.97188	-5.80045e-07
5.15388	-9.05704e-07	4.98188	-5.77908e-07
5.16388	-9.26273e-07	4.99188	-5.83096e-07
5.17388	-9.04545e-07	5.00188	-5.80655e-07
5.18388	-9.24808e-07	5.01188	-5.8157e-07
5.19388	-9.0601e-07	5.02188	-5.82486e-07
5.20388	-9.25175e-07	5.03188	-5.8096e-07
5.21388	-9.04697e-07	5.04188	-5.78519e-07
5.22388	-9.24808e-07	5.05188	-5.82486e-07
5.23388	-9.04819e-07	5.06188	-5.82181e-07
5.24388	-9.25236e-07	5.07188	-5.84012e-07
5.25388	-9.04789e-07	5.08188	-5.78519e-07
5.26388	-9.23954e-07	5.09188	-5.83707e-07
5.27388	-9.06437e-07	5.10188	-5.77908e-07
5.28388	-9.24259e-07	5.11188	-5.82791e-07
5.29388	-9.04758e-07	5.12188	-5.8035e-07
5.30388	-9.24259e-07	5.13188	-5.81265e-07
5.31388	-9.04728e-07	5.14188	-5.79739e-07
5.32388	-9.25541e-07	5.15188	-5.80045e-07
5.33388	-9.03202e-07	5.16188	-5.79129e-07
5.34388	-9.23405e-07	5.17188	-5.82181e-07
5.35388	-9.03873e-07	5.18188	-5.77908e-07
5.36388	-9.22581e-07	5.19188	-5.81876e-07
5.37388	-9.05399e-07	5.20188	-5.78824e-07
5.38388	-9.22672e-07	5.21188	-5.81265e-07
5.39388	-9.03812e-07	5.22188	-5.78213e-07
5.40388	-9.23466e-07	5.23188	-5.82486e-07
5.41388	-9.0366e-07	5.24188	-5.8035e-07
5.42388	-9.2432e-07	5.25188	-5.82486e-07
5.43388	-9.02958e-07	5.26188	-5.8096e-07
5.44388	-9.23985e-07	5.27188	-5.8096e-07
5.45388	-9.03263e-07	5.28188	-5.79129e-07
5.46388	-9.23405e-07	5.29188	-5.83401e-07
5.47388	-9.02287e-07	5.30188	-5.79739e-07
5.48388	-9.22276e-07	5.31188	-5.80655e-07
5.49388	-9.03172e-07	5.32188	-5.77908e-07
5.50388	-9.23374e-07	5.33188	-5.80045e-07
5.51388	-9.0311e-07	5.34188	-5.78519e-07
5.52388	-9.2136e-07	5.35188	-5.81265e-07
5.53388	-9.04026e-07	5.36188	-5.77908e-07
5.54388	-9.24442e-07	5.37188	-5.82181e-07
5.55388	-9.0366e-07	5.38188	-5.76688e-07
5.56388	-9.21879e-07	5.39188	-5.82181e-07
5.57388	-9.03751e-07	5.40188	-5.78213e-07
5.58388	-9.23649e-07	5.41188	-5.80045e-07
5.59388	-9.03568e-07	5.42188	-5.78213e-07
5.60388	-9.23588e-07	5.43188	-5.80655e-07
5.61388	-9.02042e-07	5.44188	-5.77298e-07
5.62388	-9.23405e-07	5.45188	-5.79434e-07
5.63388	-9.0308e-07	5.46188	-5.77603e-07
5.64388	-9.22794e-07	5.47188	-5.78824e-07
5.65388	-9.01615e-07	5.48188	-5.78213e-07
5.66388	-9.22794e-07	5.49188	-5.79739e-07
5.67388	-9.01737e-07	5.50188	-5.78824e-07
5.68388	-9.21177e-07	5.51188	-5.8096e-07
5.69388	-9.01188e-07	5.52188	-5.76688e-07
5.70388	-9.20963e-07	5.53188	-5.83707e-07
5.71388	-9.00455e-07	5.54188	-5.80045e-07
5.72388	-9.20658e-07	5.55188	-5.84012e-07
5.73388	-8.99601e-07	5.56188	-5.76993e-07
5.74388	-9.1959e-07	5.57188	-5.81876e-07
5.75388	-9.0012e-07	5.58188	-5.79434e-07
5.76388	-9.18308e-07	5.59188	-5.8096e-07
5.77388	-8.98808e-07	5.60188	-5.80655e-07
5.78388	-9.18064e-07	5.61188	-5.83401e-07
5.79388	-8.98685e-07	5.62188	-5.8096e-07
5.80388	-9.1666e-07	5.63188	-5.8035e-07
5.81388	-8.97587e-07	5.64188	-5.83401e-07
5.82388	-9.16843e-07	5.65188	-5.84317e-07
5.83388	-8.95359e-07	5.66188	-5.82486e-07
5.84388	-9.15348e-07	5.67188	-5.87064e-07
5.85388	-8.94108e-07	5.68188	-5.84927e-07
5.86388	-9.14371e-07	5.69188	-5.87979e-07
5.87388	-8.93497e-07	5.70188	-5.84927e-07
5.88388	-9.14677e-07	5.71188	-5.91031e-07
5.89388	-8.92826e-07	5.72188	-5.87369e-07
5.90388	-9.14036e-07	5.73188	-5.92557e-07
5.91388	-8.93497e-07	5.74188	-5.8981e-07
5.92388	-9.13242e-07	5.75188	-5.91946e-07
5.93388	-8.92735e-07	5.76188	-5.89505e-07
5.94388	-9.11839e-07	5.77188	-5.91641e-07
5.95388	-8.91666e-07	5.78188	-5.90726e-07
6.05391	2.25622e-06	5.88209	3.5383e-06
6.15391	1.57568e-06	5.98209	2.73355e-06
6.25391	1.24762e-06	6.08209	2.32035e-06
6.35391	1.04193e-06	6.18209	2.03867e-06
6.45391	8.988e-07	6.28209	1.84641e-06
6.55391	7.91378e-07	6.38209	1.6987e-06
6.65391	7.10201e-07	6.48209	1.57877e-06
6.75391	6.43673e-07	6.58209	1.47226e-06
6.85391	5.92098e-07	6.68209	1.39475e-06
6.95391	5.47237e-07	6.78209	1.31906e-06
7.05391	5.09701e-07	6.88209	1.25162e-06
7.15391	4.78268e-07	6.98209	1.1973e-06
7.25391	4.49886e-07	7.08209	1.1561e-06
7.35391	4.24252e-07	7.18209	1.10727e-06
7.45391	4.01363e-07	7.28209	1.06241e-06
7.55391	3.81222e-07	7.38209	1.03678e-06
7.65391	3.63522e-07	7.48209	1.00199e-06
7.75391	3.48263e-07	7.58209	9.69028e-07
7.85391	3.34835e-07	7.68209	9.46445e-07
7.95391	3.25069e-07	7.78209	9.40036e-07
8.05391	3.18966e-07	7.88209	9.08908e-07
8.15391	3.14083e-07	7.98209	8.95786e-07
8.25391	3.11947e-07	8.08209	8.9426e-07
8.35391	3.09505e-07	8.18209	8.76254e-07
8.45391	3.08285e-07	8.28209	8.64658e-07
8.55391	3.06759e-07	8.38209	8.54892e-07
8.65391	3.04928e-07	8.48209	8.60996e-07
8.75391	3.04623e-07	8.58209	8.52451e-07
8.85391	3.04928e-07	8.68209	8.27731e-07
8.95391	3.04012e-07	8.78209	8.17355e-07
9.05391	3.02181e-07	8.88209	8.05148e-07
9.15391	3.00045e-07	8.98209	7.95993e-07
9.25391	2.96688e-07	9.08209	7.92941e-07
9.35391	2.91195e-07	9.18209	7.75851e-07
9.45391	2.83566e-07	9.28209	7.69138e-07
9.55391	2.75936e-07	9.38209	7.59677e-07
9.65391	2.66476e-07	9.48209	7.5632e-07
9.75391	2.58541e-07	9.58209	7.44418e-07
9.85391	2.50301e-07	9.68209	7.53574e-07
9.95391	2.43282e-07	9.78209	7.69443e-07
10.0539	2.3901e-07	9.88209	7.76767e-07
10.1539	2.35653e-07	9.98209	7.37094e-07
10.2539	2.32296e-07	10.0821	7.23361e-07
10.3539	2.31075e-07	10.1821	7.10239e-07
10.4539	2.30465e-07	10.2821	7.13596e-07
10.5539	2.29855e-07	10.3821	7.14206e-07
10.6539	2.28634e-07	10.4821	7.22141e-07
10.7539	2.24361e-07	10.5821	7.24582e-07
10.8539	2.19479e-07	10.6821	7.13901e-07
10.9539	2.11544e-07	10.7821	7.0383e-07
11.0539	2.02389e-07	10.8821	6.98947e-07
11.1539	1.93234e-07	10.9821	6.94064e-07
11.2539	1.85299e-07	11.0821	6.96506e-07
11.3539	1.77975e-07	11.1821	6.90097e-07
11.4539	1.71871e-07	11.2821	6.90402e-07
11.5539	1.66683e-07	11.3821	6.95285e-07
11.6539	1.63021e-07	11.4821	6.91013e-07
11.7539	1.59664e-07	11.5821	6.88876e-07
11.8539	1.55697e-07	11.6821	6.88571e-07
11.9539	1.52645e-07	11.7821	6.87045e-07
12.0539	1.51119e-07	11.8821	6.8613e-07
12.1539	1.48067e-07	11.9821	6.82773e-07
12.2539	1.46236e-07	12.0821	6.71481e-07
12.3539	1.45931e-07	12.1821	6.67209e-07
12.4539	1.45321e-07	12.2821	6.68124e-07
12.5539	1.44711e-07	12.3821	6.64462e-07
12.6539	1.45931e-07	12.4821	6.72397e-07
12.7539	1.45016e-07	12.5821	6.83994e-07
12.8539	1.45016e-07	12.6821	6.8735e-07
12.9539	1.43185e-07	12.7821	6.87045e-07
13.0539	1.41659e-07	12.8821	6.81552e-07
13.1539	1.39828e-07	12.9821	6.75143e-07
13.2539	1.36166e-07	13.0821	6.65683e-07
13.3539	1.34029e-07	13.1821	6.58969e-07
13.4539	1.31283e-07	13.2821	6.59579e-07
13.5539	1.28536e-07	13.3821	6.54697e-07
13.6539	1.2579e-07	13.4821	6.58054e-07
13.7539	1.23653e-07	13.5821	6.56528e-07
13.8539	1.21517e-07	13.6821	6.54086e-07
13.9539	1.19686e-07	13.7821	6.54392e-07
14.0539	1.16329e-07	13.8821	6.58664e-07
14.1539	1.13888e-07	13.9821	6.62021e-07
14.2539	1.12057e-07	14.0821	6.48593e-07
14.3539	1.11446e-07	14.1821	6.43405e-07
14.4539	1.09921e-07	14.2821	6.48593e-07
14.5539	1.09615e-07	14.3821	6.52866e-07
14.6539	1.09615e-07	14.4821	6.47372e-07
14.7539	1.0931e-07	14.5821	6.47983e-07
14.8539	1.0931e-07	14.6821	6.5134e-07
14.9539	1.08089e-07	14.7821	6.48288e-07
15.0539	1.07174e-07	14.8821	6.32419e-07
15.1539	1.05953e-07	14.9821	6.32114e-07
15.2539	1.03817e-07	15.0821	6.31808e-07
15.3539	1.01986e-07	15.1821	6.32114e-07
15.4539	1.00155e-07	15.2821	6.28757e-07
15.5539	9.80187e-08	15.3821	6.22043e-07
15.6539	9.55773e-08	15.4821	6.1777e-07
15.7539	9.28307e-08	15.5821	6.24484e-07
15.8539	9.09996e-08	15.6821	6.19296e-07
15.9539	8.94737e-08	15.7821	6.29062e-07
16.0539	8.73375e-08	15.8821	6.3425e-07
16.1539	8.55065e-08	15.9821	6.38217e-07
16.2539	8.42858e-08	16.0821	6.40659e-07
16.3539	8.27599e-08	16.1821	6.41574e-07
16.4539	8.18444e-08	16.2821	6.38217e-07
16.5539	7.97081e-08	16.3821	6.49814e-07
16.6539	7.87926e-08	16.4821	6.58359e-07
16.7539	7.84874e-08	16.5821	6.6904e-07
16.8539	7.78771e-08	16.6821	6.64767e-07
16.9539	7.66564e-08	16.7821	6.72397e-07
17.0539	7.54357e-08	16.8821	6.82773e-07
17.1539	7.57408e-08	16.9821	6.81857e-07
17.2539	7.57408e-08	17.0821	6.69955e-07
17.3539	7.54357e-08	17.1821	6.56528e-07
17.4539	7.39098e-08	17.2821	6.40048e-07
17.5539	7.39098e-08	17.3821	6.22958e-07
17.6539	7.39098e-08	17.4821	6.19601e-07
17.7539	7.36046e-08	17.5821	6.1777e-07
17.8539	7.29943e-08	17.6821	6.1655e-07
17.9539	7.32994e-08	17.7821	6.1655e-07
18.0539	7.36046e-08	17.8821	6.19601e-07
18.1539	7.39098e-08	17.9821	6.14719e-07
18.2539	7.39098e-08	18.0821	6.15024e-07
18.3539	7.32994e-08	18.1821	6.12277e-07
18.4539	7.48253e-08	18.2821	6.14108e-07
18.5539	7.39098e-08	18.3821	6.11667e-07
18.6539	7.4215e-08	18.4821	6.09225e-07
18.7539	7.48253e-08	18.5821	6.07394e-07
18.8539	7.4215e-08	18.6821	6.03122e-07
18.9539	7.6046e-08	18.7821	6.04953e-07
19.0539	7.54357e-08	18.8821	5.98544e-07
19.1539	7.6046e-08	18.9821	6.02817e-07
19.2539	7.57408e-08	19.0821	5.98544e-07
19.3539	7.51305e-08	19.1821	5.99155e-07
19.4539	7.6046e-08	19.2821	5.97934e-07
19.5539	7.66564e-08	19.3821	5.98544e-07
19.6539	7.75719e-08	19.4821	5.94272e-07
19.7539	7.75719e-08	19.5821	5.97934e-07
19.8539	7.6046e-08	19.6821	6.03122e-07
19.9539	7.6046e-08	19.7821	6.10446e-07
20.0539	7.66564e-08	19.8821	6.15024e-07
20.1539	7.66564e-08	19.9821	6.05563e-07
20.2539	7.69615e-08	20.0821	5.86948e-07
20.3539	7.6046e-08	20.1821	5.8298e-07
20.4539	7.6046e-08	20.2821	5.77487e-07
20.5539	7.6046e-08	20.3821	5.85117e-07
20.6539	7.66564e-08	20.4821	5.84811e-07
20.7539	7.6046e-08	20.5821	5.89694e-07
20.8539	7.63512e-08	20.6821	6.23569e-07
20.9539	7.57408e-08	20.7821	8.93869e-06
21.0539	7.66564e-08	20.8821	6.38984e-05
21.1539	7.66564e-08	20.9821	4.74311e-05
21.2539	7.66564e-08	21.0821	3.75801e-05
21.3539	7.63512e-08	21.1821	3.25477e-05
21.4539	7.72667e-08	21.2821	3.26301e-05
21.5539	7.75719e-08	21.3821	3.1855e-05
21.6539	7.72667e-08	21.4821	3.17512e-05
21.7539	7.84874e-08	21.5821	2.5605e-05
21.8539	7.81822e-08	21.6821	2.29133e-05
21.9539	7.94029e-08	21.7821	2.03437e-05
22.0539	7.94029e-08	21.8821	1.37214e-05
22.1539	8.1234e-08	21.9821	1.83998e-05
22.2539	8.06237e-08	22.0821	4.38937e-07
22.3539	8.24547e-08	22.1821	3.29684e-07
22.4539	8.27599e-08	22.2821	2.81772e-07
22.5539	8.30651e-08	22.3821	2.38742e-07
22.6539	8.24547e-08	22.4821	2.19516e-07
22.7539	8.36754e-08	22.5821	2.19821e-07
22.8539	8.33702e-08	22.6821	2.01511e-07
22.9539	8.42858e-08	22.7821	2.0029e-07
23.0539	8.48961e-08	22.8821	2.04257e-07
23.1539	8.48961e-08	22.9821	1.9144e-07
23.2539	8.52013e-08	23.0821	1.83505e-07
23.3539	8.55065e-08	23.1821	1.93881e-07
23.4539	8.55065e-08	23.2821	1.93576e-07
23.5539	8.58116e-08	23.3821	1.58176e-07
23.6539	8.67272e-08	23.4821	1.5726e-07
23.7539	8.70323e-08	23.5821	1.59091e-07
23.8539	8.70323e-08	23.6821	1.73129e-07
23.9539	8.79479e-08	23.7821	1.80148e-07
24.0539	8.85582e-08	23.8821	1.79843e-07
24.1539	8.79479e-08	23.9821	1.76181e-07
24.2539	8.88634e-08	24.0821	1.64279e-07
24.3539	8.97789e-08	24.1821	1.46884e-07
24.4539	8.94737e-08	24.2821	9.94968e-07
24.5539	9.22203e-08	24.3821	1.44748e-07
24.6539	9.43566e-08	24.4821	2.68039e-07
24.7539	9.64928e-08	24.5821	1.72519e-07
24.8539	9.89342e-08	24.6821	1.59702e-07
24.9539	1.02596e-07	24.7821	1.478e-07
25.0539	1.05953e-07	24.8821	1.52072e-07
25.1539	1.09921e-07	24.9821	1.3132e-07
25.2539	1.12972e-07	25.0821	1.16672e-07
25.3539	1.16024e-07	25.1821	1.20029e-07
25.4539	1.19076e-07	25.2821	1.20944e-07
25.5539	1.21517e-07	25.3821	4.71591e-07
25.6539	1.22433e-07	25.4821	1.85336e-07
25.7539	1.23043e-07	25.5821	1.79538e-07
25.8539	1.23348e-07	25.6821	1.65805e-07
25.9539	1.22433e-07	25.7821	1.63669e-07
26.0539	1.21517e-07	25.8821	6.2601e-07
26.1539	1.19381e-07	25.9821	2.71091e-07
26.2539	1.1694e-07	26.0821	1.45053e-07
26.3539	1.16329e-07	26.1821	1.38339e-07
26.4539	1.13277e-07	26.2821	1.33456e-07
26.5539	1.11141e-07	26.3821	1.2186e-07
26.6539	1.0931e-07	26.4821	9.07318e-08
26.7539	1.07479e-07	26.5821	7.85248e-08
26.8539	1.04427e-07	26.6821	6.63178e-08
26.9539	1.02901e-07	26.7821	6.08246e-08
27.0539	1.0107e-07	26.8821	5.19745e-08
27.1539	9.95446e-08	26.9821	5.13642e-08
27.2539	9.92394e-08	27.0821	4.95331e-08
27.3539	9.80187e-08	27.1821	5.07538e-08
27.4539	9.80187e-08	27.2821	4.73969e-08
27.5539	9.77135e-08	27.3821	4.5871e-08
27.6539	9.64928e-08	27.4821	4.95331e-08
27.7539	9.52721e-08	27.5821	4.43451e-08
27.8539	9.3441e-08	27.6821	3.94623e-08
27.9539	9.13048e-08	27.7821	3.88519e-08
28.0539	8.91686e-08	27.8821	3.76312e-08
28.1539	8.58116e-08	27.9821	2.66449e-08
28.2539	8.36754e-08	28.0821	2.96967e-08
28.3539	8.03185e-08	28.1821	3.70209e-08
28.4539	7.81822e-08	28.2821	4.49555e-08
28.5539	7.81822e-08	28.3821	4.70917e-08
28.6539	7.57408e-08	28.4821	4.43451e-08
28.7539	7.54357e-08	28.5821	3.91571e-08
28.8539	7.45201e-08	28.6821	3.61054e-08
28.9539	7.36046e-08	28.7821	3.91571e-08
29.0539	7.39098e-08	28.8821	4.0683e-08
29.1539	7.39098e-08	28.9821	3.76312e-08
29.2539	7.4215e-08	29.0821	3.5495e-08
29.3539	7.36046e-08	29.1821	4.09882e-08
29.4539	7.39098e-08	29.2821	4.25141e-08
29.5539	7.39098e-08	29.3821	3.51898e-08
29.6539	7.36046e-08	29.4821	3.48847e-08
29.7539	7.26891e-08	29.5821	3.76312e-08
29.8539	7.26891e-08	29.6821	4.09882e-08
29.9539	7.23839e-08	29.7821	4.25141e-08
30.0539	7.17736e-08	29.8821	4.31244e-08
30.1539	7.05529e-08	29.9821	3.45795e-08
30.2539	7.02477e-08	30.0821	3.27484e-08
30.3539	7.02477e-08	30.1821	2.35932e-08
30.4539	7.02477e-08	30.2821	1.74896e-08
30.5539	6.93321e-08	30.3821	1.81e-08
30.6539	6.93321e-08	30.4821	1.77948e-08
30.7539	6.87218e-08	30.5821	2.26776e-08
30.8539	6.9027e-08	30.6821	2.20673e-08
30.9539	6.93321e-08	30.7821	2.42035e-08
31.0539	6.9027e-08	30.8821	2.45087e-08
31.1539	6.81114e-08	30.9821	2.3288e-08
31.2539	6.78063e-08	31.0821	2.20673e-08
31.3539	6.78063e-08	31.1821	2.3288e-08
31.4539	6.75011e-08	31.2821	2.60346e-08
31.5539	6.68907e-08	31.3821	2.5119e-08
31.6539	6.59752e-08	31.4821	2.26776e-08
31.7539	6.75011e-08	31.5821	2.26776e-08
31.8539	6.78063e-08	31.6821	1.65741e-08
31.9539	6.84166e-08	31.7821	1.53534e-08
32.0539	6.87218e-08	31.8821	1.56586e-08
32.1539	6.93321e-08	31.9821	1.59638e-08
32.2539	6.96373e-08	32.0821	1.74896e-08
32.3539	7.0858e-08	32.1821	1.32172e-08
32.4539	7.02477e-08	32.2821	1.74896e-08
32.5539	6.99425e-08	32.3821	2.45087e-08
32.6539	6.9027e-08	32.4821	2.3288e-08
32.7539	6.87218e-08	32.5821	2.20673e-08
32.8539	6.62804e-08	32.6821	1.50482e-08
32.9539	6.44493e-08	32.7821	1.35224e-08
33.0539	6.20079e-08	32.8821	1.59638e-08
33.1539	5.95665e-08	32.9821	1.53534e-08
33.2539	5.68199e-08	33.0821	1.65741e-08
33.3539	5.43785e-08	33.1821	1.56586e-08
33.4539	5.19371e-08	33.2821	1.32172e-08
33.5539	4.94957e-08	33.3821	1.44379e-08
33.6539	4.70543e-08	33.4821	1.32172e-08
33.7539	4.43077e-08	33.5821	1.1081e-08
33.8539	4.1256e-08	33.6821	1.35224e-08
33.9539	3.85094e-08	33.7821	1.44379e-08
34.0539	3.63732e-08	33.8821	1.81e-08
34.1539	3.42369e-08	33.9821	1.99311e-08
34.2539	3.11852e-08	34.0821	1.68793e-08
34.3539	3.05748e-08	34.1821	1.50482e-08
34.4539	2.81334e-08	34.2821	2.05414e-08
34.5539	2.5692e-08	34.3821	1.68793e-08
34.6539	2.32506e-08	34.4821	1.13861e-08
34.7539	2.0504e-08	34.5821	1.31533e-09
34.8539	1.74523e-08	34.6821	1.92568e-09
34.9539	1.50109e-08	34.7821	2.53603e-09
35.0539	1.13487e-08	34.8821	5.28261e-09
35.1539	8.29699e-09	34.9821	7.11367e-09
35.2539	8.29699e-09	35.0821	7.11367e-09
35.3539	7.68664e-09	35.1821	1.2912e-08
35.4539	7.38146e-09	35.2821	1.16913e-08
35.5539	7.07629e-09	35.3821	9.55507e-09
35.6539	7.99182e-09	35.4821	8.94472e-09
35.7539	7.68664e-09	35.5821	1.1081e-08
35.8539	8.29699e-09	35.6821	1.53534e-08
35.9539	7.38146e-09	35.7821	1.07758e-08
36.0539	7.38146e-09	35.8821	4.06191e-09
36.1539	6.46594e-09	35.9821	8.63955e-09
36.2539	6.16076e-09	36.0821	1.19965e-08
36.3539	6.16076e-09	36.1821	1.19965e-08
36.4539	7.38146e-09	36.2821	9.86025e-09
36.5539	7.99182e-09	36.3821	1.23017e-08
36.6539	7.99182e-09	36.4821	1.71845e-08
36.7539	8.90734e-09	36.5821	8.94472e-09
36.8539	9.21252e-09	36.6821	9.2499e-09
36.9539	1.04332e-08	36.7821	1.19965e-08
37.0539	1.13487e-08	36.8821	1.07758e-08
37.1539	1.19591e-08	36.9821	9.2499e-09
37.2539	1.19591e-08	37.0821	7.72402e-09
37.3539	1.22643e-08	37.1821	6.80849e-09
37.4539	1.22643e-08	37.2821	6.80849e-09
37.5539	1.16539e-08	37.3821	6.80849e-09
37.6539	1.28746e-08	37.4821	8.94472e-09
37.7539	1.28746e-08	37.5821	9.2499e-09
37.8539	1.28746e-08	37.6821	9.55507e-09
37.9539	1.28746e-08	37.7821	1.01654e-08
38.0539	1.28746e-08	37.8821	1.1081e-08
38.1539	1.13487e-08	37.9821	1.13861e-08
38.2539	1.16539e-08	38.0821	1.1081e-08
38.3539	9.82287e-09	38.1821	9.55507e-09
38.4539	9.51769e-09	38.2821	9.2499e-09
38.5539	9.51769e-09	38.3821	8.33437e-09
38.6539	8.60217e-09	38.4821	1.90155e-08
38.7539	7.38146e-09	38.5821	2.05414e-08
38.8539	6.16076e-09	38.6821	1.77948e-08
38.9539	4.94006e-09	38.7821	1.26068e-08
39.0539	3.71935e-09	38.8821	1.2912e-08
39.1539	3.109e-09	38.9821	9.2499e-09
39.2539	1.8883e-09	39.0821	1.01654e-08
39.3539	6.67597e-10	39.1821	9.86025e-09
39.4539	5.72454e-11	39.2821	8.33437e-09
39.5539	-1.16346e-09	39.3821	7.11367e-09
39.6539	-2.68934e-09	39.4821	5.289e-08
39.7539	-3.91004e-09	39.5821	9.50043e-08
39.8539	-3.60486e-09	39.6821	9.50043e-08
39.9539	-4.52039e-09	39.7821	8.43231e-08
40.0539	-6.04627e-09	39.8821	7.12006e-08
40.1539	-6.35145e-09	39.9821	6.08246e-08
40.2539	-6.35145e-09	40.0821	5.38056e-08
40.3539	-6.9618e-09	40.1821	4.92279e-08
40.4539	-6.9618e-09	40.2821	4.64813e-08
40.5539	-7.26697e-09	40.3821	4.5871e-08
40.6539	-8.1825e-09	40.4821	4.70917e-08
40.7539	-8.48768e-09	40.5821	4.86176e-08
40.8539	-8.48768e-09	40.6821	4.80072e-08
40.9539	-9.09803e-09	40.7821	4.09882e-08
41.0539	-9.4032e-09	40.8821	3.73261e-08
41.1539	-9.4032e-09	40.9821	3.73261e-08
41.2539	-1.03187e-08	41.0821	3.64105e-08
41.3539	-9.70838e-09	41.1821	3.42743e-08
41.4539	-1.09291e-08	41.2821	3.39691e-08
41.5539	-1.09291e-08	41.3821	3.33588e-08
41.6539	-1.03187e-08	41.4821	3.27484e-08
41.7539	-9.4032e-09	41.5821	2.96967e-08
41.8539	-1.06239e-08	41.6821	3.06122e-08
41.9539	-1.09291e-08	41.7821	3.15277e-08
42.0539	-9.70838e-09	41.8821	3.21381e-08
42.1539	-1.09291e-08	41.9821	2.75604e-08
42.2539	-1.09291e-08	42.0821	2.29828e-08
42.3539	-1.09291e-08	42.1821	2.48139e-08
42.4539	-1.06239e-08	42.2821	2.69501e-08
42.5539	-1.03187e-08	42.3821	2.60346e-08
42.6539	-9.70838e-09	42.4821	2.23725e-08
42.7539	-1.00136e-08	42.5821	2.17621e-08
42.8539	-1.00136e-08	42.6821	1.90155e-08
42.9539	-9.70838e-09	42.7821	1.71845e-08
43.0539	-1.03187e-08	42.8821	1.53534e-08
43.1539	-1.06239e-08	42.9821	1.23017e-08
43.2539	-1.03187e-08	43.0821	1.44379e-08
43.3539	-1.12343e-08	43.1821	1.53534e-08
43.4539	-1.2455e-08	43.2821	1.38275e-08
43.5539	-1.30653e-08	43.3821	9.2499e-09
43.6539	-1.39808e-08	43.4821	1.38275e-08
43.7539	-1.52015e-08	43.5821	1.62689e-08
43.8539	-1.67274e-08	43.6821	2.3288e-08
43.9539	-1.70326e-08	43.7821	2.5119e-08
44.0539	-1.85585e-08	43.8821	2.35932e-08
44.1539	-1.85585e-08	43.9821	1.93207e-08
44.2539	-1.88637e-08	44.0821	1.53534e-08
44.3539	-1.85585e-08	44.1821	1.84052e-08
44.4539	-1.91688e-08	44.2821	1.77948e-08
44.5539	-1.82533e-08	44.3821	2.20673e-08
44.6539	-1.79481e-08	44.4821	2.75604e-08
44.7539	-1.76429e-08	44.5821	2.3288e-08
44.8539	-1.73378e-08	44.6821	2.05414e-08
44.9539	-1.55067e-08	44.7821	1.74896e-08
45.0539	-1.4286e-08	44.8821	1.26068e-08
45.1539	-1.30653e-08	44.9821	1.26068e-08
45.2539	-1.2455e-08	45.0821	1.50482e-08
45.3539	-1.18446e-08	45.1821	1.32172e-08
45.4539	-1.09291e-08	45.2821	1.41327e-08
45.5539	-1.03187e-08	45.3821	1.2912e-08
45.6539	-9.70838e-09	45.4821	1.65741e-08
45.7539	-9.70838e-09	45.5821	1.93207e-08
45.8539	-1.00136e-08	45.6821	2.3288e-08
45.9539	-8.79285e-09	45.7821	2.17621e-08
46.0539	-9.09803e-09	45.8821	1.84052e-08
46.1539	-8.48768e-09	45.9821	2.02362e-08
46.2539	-7.87732e-09	46.0821	1.68793e-08
46.3539	-7.26697e-09	46.1821	1.53534e-08
46.4539	-7.26697e-09	46.2821	1.81e-08
46.5539	-6.9618e-09	46.3821	1.71845e-08
46.6539	-6.9618e-09	46.4821	1.35224e-08
46.7539	-6.35145e-09	46.5821	1.16913e-08
46.8539	-6.65662e-09	46.6821	1.41327e-08
46.9539	-6.04627e-09	46.7821	1.41327e-08
47.0539	-6.35145e-09	46.8821	1.2912e-08
47.1539	-5.74109e-09	46.9821	1.41327e-08
47.2539	-6.35145e-09	47.0821	1.1081e-08
47.3539	-5.43592e-09	47.1821	9.55507e-09
47.4539	-6.04627e-09	47.2821	1.32172e-08
47.5539	-6.04627e-09	47.3821	1.53534e-08
47.6539	-5.74109e-09	47.4821	1.50482e-08
47.7539	-6.04627e-09	47.5821	1.44379e-08
47.8539	-6.04627e-09	47.6821	1.35224e-08
47.9539	-4.82557e-09	47.7821	1.47431e-08
48.0539	-5.13074e-09	47.8821	1.62689e-08
48.1539	-4.21522e-09	47.9821	1.65741e-08
48.2539	-3.60486e-09	48.0821	1.68793e-08
48.3539	-2.68934e-09	48.1821	1.81e-08
48.4539	-1.46863e-09	48.2821	1.41327e-08
48.5539	3.62421e-10	48.3821	9.2499e-09
48.6539	2.19348e-09	48.4821	1.23017e-08
48.7539	3.41418e-09	48.5821	1.44379e-08
48.8539	7.38146e-09	48.6821	1.87103e-08
48.9539	9.51769e-09	48.7821	1.74896e-08
49.0539	1.22643e-08	48.8821	1.74896e-08
49.1539	1.50109e-08	48.9821	1.68793e-08
49.2539	1.80626e-08	49.0821	1.99311e-08
49.3539	2.14196e-08	49.1821	1.99311e-08
49.4539	2.44713e-08	49.2821	1.59638e-08
49.5539	2.66075e-08	49.3821	1.23017e-08
49.6539	2.87438e-08	49.4821	1.2912e-08
49.7539	3.02696e-08	49.5821	8.94472e-09
49.8539	3.21007e-08	49.6821	8.63955e-09
49.9539	3.42369e-08	49.7821	1.04706e-08
50.0539	3.57628e-08	49.8821	1.07758e-08
50.1539	3.7899e-08	49.9821	1.19965e-08
50.2539	3.94249e-08	50.0821	1.23017e-08
50.3539	4.03404e-08	50.1821	1.47431e-08
50.4539	4.15612e-08	50.2821	1.44379e-08
50.5539	4.3087e-08	50.3821	1.68793e-08
50.6539	4.58336e-08	50.4821	1.71845e-08
50.7539	4.70543e-08	50.5821	1.32172e-08
50.8539	4.79698e-08	50.6821	1.38275e-08
50.9539	5.04112e-08	50.7821	1.56586e-08
51.0539	5.19371e-08	50.8821	1.53534e-08
51.1539	5.3463e-08	50.9821	1.53534e-08
51.2539	5.52941e-08	51.0821	1.59638e-08
51.3539	5.71251e-08	51.1821	1.77948e-08
51.4539	5.92613e-08	51.2821	1.62689e-08
51.5539	6.13976e-08	51.3821	1.77948e-08
51.6539	6.29235e-08	51.4821	1.90155e-08
51.7539	6.50597e-08	51.5821	1.93207e-08
51.8539	6.62804e-08	51.6821	1.87103e-08
51.9539	6.81114e-08	51.7821	1.87103e-08
52.0539	6.93321e-08	51.8821	2.02362e-08
52.1539	7.02477e-08	51.9821	2.02362e-08
52.2539	7.05529e-08	52.0821	1.99311e-08
52.3539	7.05529e-08	52.1821	1.93207e-08
52.4539	7.14684e-08	52.2821	1.87103e-08
52.5539	7.17736e-08	52.3821	2.05414e-08
52.6539	7.17736e-08	52.4821	2.11518e-08
52.7539	7.20787e-08	52.5821	1.87103e-08
52.8539	7.23839e-08	52.6821	1.90155e-08
52.9539	7.26891e-08	52.7821	1.84052e-08
53.0539	7.26891e-08	52.8821	1.77948e-08
53.1539	7.29943e-08	52.9821	1.84052e-08
53.2539	7.32994e-08	53.0821	1.96259e-08
53.3539	7.23839e-08	53.1821	1.93207e-08
53.4539	7.17736e-08	53.2821	1.74896e-08
53.5539	7.14684e-08	53.3821	1.84052e-08
53.6539	7.05529e-08	53.4821	1.74896e-08
53.7539	6.78063e-08	53.5821	1.87103e-08
53.8539	6.50597e-08	53.6821	1.84052e-08
53.9539	6.07872e-08	53.7821	1.81e-08
54.0539	5.71251e-08	53.8821	1.68793e-08
54.1539	5.31578e-08	53.9821	1.74896e-08
54.2539	4.6444e-08	54.0821	1.65741e-08
54.3539	4.1256e-08	54.1821	1.62689e-08
54.4539	3.45421e-08	54.2821	1.74896e-08
54.5539	2.90489e-08	54.3821	1.96259e-08
54.6539	2.32506e-08	54.4821	1.93207e-08
54.7539	1.74523e-08	54.5821	1.81e-08
54.8539	1.3485e-08	54.6821	1.87103e-08
54.9539	8.90734e-09	54.7821	2.02362e-08
55.0539	5.24523e-09	54.8821	2.11518e-08
55.1539	2.19348e-09	54.9821	2.11518e-08
55.2539	-8.58282e-10	55.0821	2.20673e-08
55.3539	-3.29969e-09	55.1821	2.08466e-08
55.4539	-6.04627e-09	55.2821	1.96259e-08
55.5539	-8.79285e-09	55.3821	1.84052e-08
55.6539	-1.15394e-08	55.4821	1.81e-08
55.7539	-1.30653e-08	55.5821	1.74896e-08
55.8539	-1.58119e-08	55.6821	1.65741e-08
55.9539	-1.76429e-08	55.7821	1.77948e-08
56.0539	-1.9474e-08	55.8821	1.99311e-08
56.1539	-2.09999e-08	55.9821	1.96259e-08
56.2539	-2.22206e-08	56.0821	1.99311e-08
56.3539	-2.40516e-08	56.1821	1.74896e-08
56.4539	-2.40516e-08	56.2821	2.69501e-08
56.5539	-2.55775e-08	56.3821	2.75604e-08
56.6539	-2.58827e-08	56.4821	2.57294e-08
56.7539	-2.6493e-08	56.5821	2.45087e-08
56.8539	-2.67982e-08	56.6821	2.35932e-08
56.9539	-2.74086e-08	56.7821	2.54242e-08
57.0539	-2.80189e-08	56.8821	2.42035e-08
57.1539	-2.80189e-08	56.9821	1.93207e-08
57.2539	-2.86293e-08	57.0821	1.01654e-08
57.3539	-2.89345e-08	57.1821	7.11367e-09
57.4539	-2.92396e-08	57.2821	1.01654e-08
57.5539	-3.01552e-08	57.3821	1.23017e-08
57.6539	-3.13759e-08	57.4821	1.26068e-08
57.7539	-3.10707e-08	57.5821	9.2499e-09
57.8539	-3.22914e-08	57.6821	6.50332e-09
57.9539	-3.29017e-08	57.7821	7.72402e-09
58.0539	-3.29017e-08	57.8821	9.55507e-09
58.1539	-3.41224e-08	57.9821	8.63955e-09
58.2539	-3.38173e-08	58.0821	9.86025e-09
58.3539	-3.41224e-08	58.1821	8.0292e-09
58.4539	-3.44276e-08	58.2821	8.63955e-09
58.5539	-3.53431e-08	58.3821	1.19965e-08
58.6539	-3.59535e-08	58.4821	1.16913e-08
58.7539	-3.59535e-08	58.5821	1.1081e-08
58.8539	-3.6869e-08	58.6821	1.04706e-08
58.9539	-3.74794e-08	58.7821	1.2912e-08
59.0539	-3.80897e-08	58.8821	9.2499e-09
59.1539	-3.93104e-08	58.9821	8.63955e-09
59.2539	-3.96156e-08	59.0821	8.94472e-09
59.3539	-3.96156e-08	59.1821	1.23017e-08
59.4539	-4.05311e-08	59.2821	9.55507e-09
59.5539	-4.14467e-08	59.3821	9.86025e-09
59.6539	-4.08363e-08	59.4821	1.62689e-08
59.7539	-4.08363e-08	59.5821	1.90155e-08
59.8539	-4.17518e-08	59.6821	2.05414e-08
59.9539	-4.2057e-08	59.7821	1.38275e-08
60.0539	-4.26674e-08	59.8821	1.26068e-08
60.1539	-4.29725e-08	59.9821	1.19965e-08
60.2539	-4.29725e-08	60.0821	1.19965e-08
60.3539	-4.29725e-08	60.1821	1.26068e-08
60.4539	-4.38881e-08	60.2821	1.07758e-08
60.5539	-4.44984e-08	60.3821	1.01654e-08
60.6539	-4.41932e-08	60.4821	1.07758e-08
60.7539	-4.51088e-08	60.5821	9.86025e-09
60.8539	-4.51088e-08	60.6821	1.16913e-08
60.9539	-4.66346e-08	60.7821	1.2912e-08
61.0539	-4.69398e-08	60.8821	1.35224e-08
61.1539	-4.75502e-08	60.9821	1.41327e-08
61.2539	-4.75502e-08	61.0821	1.38275e-08
61.3539	-4.81605e-08	61.1821	1.38275e-08
61.4539	-4.87709e-08	61.2821	1.13861e-08
61.5539	-4.90761e-08	61.3821	1.35224e-08
61.6539	-4.99916e-08	61.4821	1.32172e-08
61.7539	-5.09071e-08	61.5821	1.59638e-08
61.8539	-5.2433e-08	61.6821	2.02362e-08
61.9539	-5.39589e-08	61.7821	2.29828e-08
62.0539	-5.57899e-08	61.8821	2.29828e-08
62.1539	-5.7621e-08	61.9821	1.93207e-08
62.2539	-5.9452e-08	62.0821	1.32172e-08
62.3539	-6.09779e-08	62.1821	1.26068e-08
62.4539	-6.2809e-08	62.2821	1.19965e-08
62.5539	-6.43348e-08	62.3821	1.16913e-08
62.6539	-6.49452e-08	62.4821	1.65741e-08
62.7539	-6.43348e-08	62.5821	1.26068e-08
62.8539	-6.43348e-08	62.6821	5.89297e-09
62.9539	-6.464e-08	62.7821	7.72402e-09
63.0539	-6.52504e-08	62.8821	6.80849e-09
63.1539	-6.55555e-08	62.9821	5.58779e-09
63.2539	-6.64711e-08	63.0821	6.50332e-09
63.3539	-6.70814e-08	63.1821	1.23017e-08
63.4539	-6.7997e-08	63.2821	1.35224e-08
63.5539	-6.86073e-08	63.3821	8.63955e-09
63.6539	-6.92177e-08	63.4821	7.11367e-09
63.7539	-6.92177e-08	63.5821	9.55507e-09
63.8539	-6.9828e-08	63.6821	1.23017e-08
63.9539	-7.01332e-08	63.7821	1.53534e-08
64.0539	-7.22694e-08	63.8821	1.59638e-08
64.1539	-7.34901e-08	63.9821	1.50482e-08
64.2539	-7.31849e-08	64.0821	1.50482e-08
64.3539	-7.41005e-08	64.1821	1.35224e-08
64.4539	-7.44056e-08	64.2821	9.55507e-09
64.5539	-7.41005e-08	64.3821	1.04706e-08
64.6539	-7.22694e-08	64.4821	8.33437e-09
64.7539	-7.13539e-08	64.5821	8.33437e-09
64.8539	-6.95228e-08	64.6821	9.2499e-09
64.9539	-6.83021e-08	64.7821	1.1081e-08
65.0539	-6.83021e-08	64.8821	1.1081e-08
65.1539	-6.70814e-08	64.9821	1.53534e-08
65.2539	-6.58607e-08	65.0821	1.56586e-08
65.3539	-6.43348e-08	65.1821	1.59638e-08
65.4539	-6.37245e-08	65.2821	1.90155e-08
65.5539	-6.15883e-08	65.3821	2.02362e-08
65.6539	-6.09779e-08	65.4821	2.20673e-08
65.7539	-6.00624e-08	65.5821	2.48139e-08
65.8539	-5.85365e-08	65.6821	2.5119e-08
65.9539	-5.7621e-08	65.7821	2.57294e-08
66.0539	-5.70106e-08	65.8821	2.29828e-08
66.1539	-5.64003e-08	65.9821	2.5119e-08
66.2539	-5.57899e-08	66.0821	2.48139e-08
66.3539	-5.60951e-08	66.1821	2.54242e-08
66.4539	-5.54847e-08	66.2821	2.29828e-08
66.5539	-5.51796e-08	66.3821	1.90155e-08
66.6539	-5.54847e-08	66.4821	1.50482e-08
66.7539	-5.54847e-08	66.5821	1.56586e-08
66.8539	-5.48744e-08	66.6821	1.01654e-08
66.9539	-5.51796e-08	66.7821	9.55507e-09
67.0539	-5.54847e-08	66.8821	1.07758e-08
67.1539	-5.54847e-08	66.9821	1.35224e-08
67.2539	-5.64003e-08	67.0821	1.38275e-08
67.3539	-5.57899e-08	67.1821	1.44379e-08
67.4539	-5.57899e-08	67.2821	1.56586e-08
67.5539	-5.67054e-08	67.3821	9.55507e-09
67.6539	-5.70106e-08	67.4821	9.86025e-09
67.7539	-5.82313e-08	67.5821	1.07758e-08
67.8539	-5.67054e-08	67.6821	1.35224e-08
67.9539	-5.79262e-08	67.7821	1.50482e-08
68.0539	-5.82313e-08	67.8821	1.50482e-08
68.1539	-5.9452e-08	67.9821	1.50482e-08
68.2539	-6.03676e-08	68.0821	1.65741e-08
68.3539	-6.00624e-08	68.1821	1.77948e-08
68.4539	-6.00624e-08	68.2821	1.84052e-08
68.5539	-6.03676e-08	68.3821	1.84052e-08
68.6539	-6.06727e-08	68.4821	1.77948e-08
68.7539	-6.12831e-08	68.5821	1.90155e-08
68.8539	-6.12831e-08	68.6821	1.71845e-08
68.9539	-6.18934e-08	68.7821	1.68793e-08
69.0539	-6.21986e-08	68.8821	1.62689e-08
69.1539	-6.2809e-08	68.9821	1.44379e-08
69.2539	-6.31141e-08	69.0821	1.2912e-08
69.3539	-6.40297e-08	69.1821	1.23017e-08
69.4539	-6.37245e-08	69.2821	1.1081e-08
69.5539	-6.49452e-08	69.3821	1.07758e-08
69.6539	-6.55555e-08	69.4821	1.04706e-08
69.7539	-6.52504e-08	69.5821	1.07758e-08
69.8539	-6.55555e-08	69.6821	1.26068e-08
69.9539	-6.61659e-08	69.7821	1.13861e-08
70.0539	-6.58607e-08	69.8821	1.2912e-08
70.1539	-6.61659e-08	69.9821	1.44379e-08
70.2539	-6.70814e-08	70.0821	1.32172e-08
70.3539	-6.58607e-08	70.1821	1.23017e-08
70.4539	-6.52504e-08	70.2821	1.01654e-08
70.5539	-6.52504e-08	70.3821	7.41884e-09
70.6539	-6.43348e-08	70.4821	7.72402e-09
70.7539	-6.40297e-08	70.5821	6.80849e-09
70.8539	-6.43348e-08	70.6821	8.33437e-09
70.9539	-6.37245e-08	70.7821	8.33437e-09
71.0539	-6.37245e-08	70.8821	4.67226e-09
71.1539	-6.37245e-08	70.9821	2.84121e-09
71.2539	-6.40297e-08	71.0821	3.99801e-10
71.3539	-6.49452e-08	71.1821	1.31533e-09
71.4539	-6.52504e-08	71.2821	2.23086e-09
71.5539	-6.55555e-08	71.3821	7.04977e-10
71.6539	-6.58607e-08	71.4821	-5.15726e-10
71.7539	-6.70814e-08	71.5821	-2.95713e-09
71.8539	-6.70814e-08	71.6821	-5.15726e-10
71.9539	-6.70814e-08	71.7821	4.06191e-09
72.0539	-6.76918e-08	71.8821	3.14638e-09
72.1539	-6.7997e-08	71.9821	1.6205e-09
72.2539	-6.7997e-08	72.0821	-1.43125e-09
72.3539	-6.86073e-08	72.1821	-2.0416e-09
72.4539	-6.89125e-08	72.2821	-3.56748e-09
72.5539	-6.86073e-08	72.3821	-4.48301e-09
72.6539	-6.89125e-08	72.4821	-5.09336e-09
72.7539	-6.89125e-08	72.5821	-7.53477e-09
72.8539	-6.89125e-08	72.6821	-5.39854e-09
72.9539	-7.01332e-08	72.7821	-4.48301e-09
73.0539	-6.92177e-08	72.8821	-3.56748e-09
73.1539	-6.95228e-08	72.9821	-1.12608e-09
73.2539	-6.83021e-08	73.0821	9.46255e-11
73.3539	-6.86073e-08	73.1821	7.04977e-10
73.4539	-6.86073e-08	73.2821	3.14638e-09
73.5539	-6.73866e-08	73.3821	7.41884e-09
73.6539	-6.76918e-08	73.4821	7.41884e-09
73.7539	-6.86073e-08	73.5821	8.33437e-09
73.8539	-6.89125e-08	73.6821	6.19814e-09
73.9539	-6.92177e-08	73.7821	2.84121e-09
74.0539	-7.04384e-08	73.8821	2.53603e-09
74.1539	-7.10487e-08	73.9821	3.75673e-09
74.2539	-7.13539e-08	74.0821	7.11367e-09
74.3539	-7.28798e-08	74.1821	9.2499e-09
74.4539	-7.31849e-08	74.2821	1.04706e-08
74.5539	-7.44056e-08	74.3821	1.1081e-08
74.6539	-7.5016e-08	74.4821	1.1081e-08
74.7539	-7.65419e-08	74.5821	1.13861e-08
74.8539	-7.68471e-08	74.6821	9.86025e-09
74.9539	-7.74574e-08	74.7821	9.2499e-09
75.0539	-7.68471e-08	74.8821	6.19814e-09
75.1539	-7.86781e-08	74.9821	4.06191e-09
75.2539	-7.98988e-08	75.0821	3.75673e-09
75.3539	-8.05092e-08	75.1821	5.58779e-09
75.4539	-8.05092e-08	75.2821	4.97744e-09
75.5539	-8.2035e-08	75.3821	5.89297e-09
75.6539	-8.26454e-08	75.4821	7.41884e-09
75.7539	-8.41713e-08	75.5821	5.58779e-09
75.8539	-8.38661e-08	75.6821	5.89297e-09
75.9539	-8.5392e-08	75.7821	4.67226e-09
76.0539	-8.66127e-08	75.8821	3.75673e-09
76.1539	-8.66127e-08	75.9821	4.36709e-09
76.2539	-8.75282e-08	76.0821	4.36709e-09
76.3539	-8.78334e-08	76.1821	4.06191e-09
76.4539	-8.81386e-08	76.2821	5.28261e-09
76.5539	-8.84437e-08	76.3821	5.89297e-09
76.6539	-8.81386e-08	76.4821	5.89297e-09
76.7539	-8.75282e-08	76.5821	7.41884e-09
76.8539	-8.81386e-08	76.6821	7.41884e-09
76.9539	-8.84437e-08	76.7821	8.33437e-09
77.0539	-8.81386e-08	76.8821	8.63955e-09
77.1539	-8.78334e-08	76.9821	8.63955e-09
77.2539	-8.81386e-08	77.0821	6.80849e-09
77.3539	-8.87489e-08	77.1821	4.36709e-09
77.4539	-8.87489e-08	77.2821	5.89297e-09
77.5539	-8.84437e-08	77.3821	3.75673e-09
77.6539	-8.90541e-08	77.4821	3.14638e-09
77.7539	-8.90541e-08	77.5821	2.23086e-09
77.8539	-9.08851e-08	77.6821	4.06191e-09
77.9539	-9.11903e-08	77.7821	2.53603e-09
78.0539	-9.18007e-08	77.8821	-2.1055e-10
78.1539	-9.2411e-08	77.9821	2.53603e-09
78.2539	-9.39369e-08	78.0821	3.99801e-10
78.3539	-9.42421e-08	78.1821	2.23086e-09
78.4539	-9.51576e-08	78.2821	7.04977e-10
78.5539	-9.54628e-08	78.3821	-2.1055e-10
78.6539	-9.57679e-08	78.4821	9.46255e-11
78.7539	-9.60731e-08	78.5821	-8.20902e-10
78.8539	-9.57679e-08	78.6821	9.46255e-11
78.9539	-9.57679e-08	78.7821	2.23086e-09
79.0539	-9.69887e-08	78.8821	1.92568e-09
79.1539	-9.57679e-08	78.9821	2.23086e-09
79.2539	-9.57679e-08	79.0821	4.06191e-09
79.3539	-9.60731e-08	79.1821	5.89297e-09
79.4539	-9.57679e-08	79.2821	4.97744e-09
79.5539	-9.57679e-08	79.3821	6.19814e-09
79.6539	-9.48524e-08	79.4821	8.63955e-09
79.7539	-9.54628e-08	79.5821	1.13861e-08
79.8539	-9.54628e-08	79.6821	1.23017e-08
79.9539	-9.48524e-08	79.7821	1.32172e-08
80.0539	-9.51576e-08	79.8821	1.44379e-08
80.1539	-9.63783e-08	79.9821	1.44379e-08
80.2539	-9.63783e-08	80.0821	1.47431e-08
80.3539	-9.66835e-08	80.1821	1.53534e-08
80.4539	-9.51576e-08	80.2821	1.81e-08
80.5539	-9.51576e-08	80.3821	1.71845e-08
80.6539	-9.54628e-08	80.4821	1.47431e-08
80.7539	-9.57679e-08	80.5821	8.33437e-09
80.8539	-9.60731e-08	80.6821	3.75673e-09
80.9539	-9.57679e-08	80.7821	1.6205e-09
81.0539	-9.51576e-08	80.8821	-2.1055e-10
81.1539	-9.45472e-08	80.9821	-2.1055e-10
81.2539	-9.33265e-08	81.0821	1.31533e-09
81.3539	-9.27162e-08	81.1821	1.92568e-09
81.4539	-9.21058e-08	81.2821	2.53603e-09
81.5539	-9.21058e-08	81.3821	1.92568e-09
81.6539	-9.08851e-08	81.4821	7.04977e-10
81.7539	-9.08851e-08	81.5821	7.04977e-10
81.8539	-9.058e-08	81.6821	1.01015e-09
81.9539	-8.96644e-08	81.7821	2.84121e-09
82.0539	-9.02748e-08	81.8821	5.58779e-09
82.1539	-8.99696e-08	81.9821	6.50332e-09
82.2539	-8.99696e-08	82.0821	6.80849e-09
82.3539	-8.96644e-08	82.1821	7.72402e-09
82.4539	-9.08851e-08	82.2821	4.67226e-09
82.5539	-9.08851e-08	82.3821	4.06191e-09
82.6539	-9.21058e-08	82.4821	2.23086e-09
82.7539	-9.39369e-08	82.5821	1.31533e-09
82.8539	-9.54628e-08	82.6821	1.6205e-09
82.9539	-9.88197e-08	82.7821	1.01015e-09
83.0539	-1.01871e-07	82.8821	2.23086e-09
83.1539	-1.0828e-07	82.9821	2.84121e-09
83.2539	-1.17435e-07	83.0821	2.84121e-09
83.3539	-1.19877e-07	83.1821	1.6205e-09
83.4539	-1.18961e-07	83.2821	-1.12608e-09
83.5539	-1.17435e-07	83.3821	-4.78819e-09
83.6539	-1.13468e-07	83.4821	-4.48301e-09
83.7539	-1.13163e-07	83.5821	-6.61924e-09
83.8539	-1.18656e-07	83.6821	-3.87266e-09
83.9539	-1.35136e-07	83.7821	-1.12608e-09
84.0539	-1.47648e-07	83.8821	-2.0416e-09
84.1539	-1.47343e-07	83.9821	3.99801e-10
84.2539	-1.47343e-07	84.0821	3.99801e-10
84.3539	-1.507e-07	84.1821	5.58779e-09
84.4539	-1.44291e-07	84.2821	4.36709e-09
84.5539	-1.32999e-07	84.3821	4.97744e-09
84.6539	-1.22318e-07	84.4821	2.53603e-09
84.7539	-1.13163e-07	84.5821	1.01015e-09
84.8539	-1.05839e-07	84.6821	-3.87266e-09
84.9539	-1.04923e-07	84.7821	-4.17784e-09
85.0539	-1.0767e-07	84.8821	-5.70371e-09
85.1539	-1.04618e-07	84.9821	-5.70371e-09
85.2539	-9.57679e-08	85.0821	-7.53477e-09
85.3539	-8.47816e-08	85.1821	-5.39854e-09
85.4539	-7.5016e-08	85.2821	-3.87266e-09
85.5539	-6.92177e-08	85.3821	-2.95713e-09
85.6539	-6.64711e-08	85.4821	-4.48301e-09
85.7539	-6.70814e-08	85.5821	-3.26231e-09
85.8539	-7.01332e-08	85.6821	-1.73643e-09
85.9539	-7.95936e-08	85.7821	-1.73643e-09
86.0539	-9.14955e-08	85.8821	-8.20902e-10
86.1539	-1.01261e-07	85.9821	-5.39854e-09
86.2539	-9.72938e-08	86.0821	-6.92442e-09
86.3539	-8.90541e-08	86.1821	-9.06065e-09
86.4539	-8.93593e-08	86.2821	-7.83994e-09
86.5539	-9.63783e-08	86.3821	-9.36582e-09
86.6539	-1.00651e-07	86.4821	-1.15021e-08
86.7539	-1.10722e-07	86.5821	-1.33331e-08
86.8539	-1.22318e-07	86.6821	-1.18072e-08
86.9539	-1.32084e-07	86.7821	-1.21124e-08
87.0539	-1.37577e-07	86.8821	-9.671e-09
87.1539	-1.41544e-07	86.9821	-8.14512e-09
87.2539	-1.45512e-07	87.0821	-9.97618e-09
87.3539	-1.45512e-07	87.1821	-1.39435e-08
87.4539	-1.4246e-07	87.2821	-1.45538e-08
87.5539	-1.41239e-07	87.3821	-1.54693e-08
87.6539	-1.37882e-07	87.4821	-1.57745e-08
87.7539	-1.32084e-07	87.5821	-1.33331e-08
87.8539	-1.2476e-07	87.6821	-1.33331e-08
87.9539	-1.14384e-07	87.7821	-1.18072e-08
88.0539	-1.04313e-07	87.8821	-1.69952e-08
88.1539	-9.11903e-08	87.9821	-1.54693e-08
88.2539	-7.83729e-08	88.0821	-1.57745e-08
88.3539	-7.56263e-08	88.1821	-1.39435e-08
88.4539	-7.56263e-08	88.2821	-1.08917e-08
88.5539	-7.65419e-08	88.3821	-9.671e-09
88.6539	-7.59315e-08	88.4821	-1.08917e-08
88.7539	-7.53212e-08	88.5821	-1.42486e-08
88.8539	-7.25746e-08	88.6821	-1.33331e-08
88.9539	-6.9828e-08	88.7821	-9.97618e-09
89.0539	-6.73866e-08	88.8821	-9.671e-09
89.1539	-6.52504e-08	88.9821	-5.70371e-09
89.2539	-6.31141e-08	89.0821	-2.1055e-10
89.3539	-6.03676e-08	89.1821	1.01015e-09
89.4539	-5.73158e-08	89.2821	1.31533e-09
89.5539	-5.27382e-08	89.3821	-1.73643e-09
89.6539	-4.78554e-08	89.4821	-3.56748e-09
89.7539	-4.29725e-08	89.5821	-7.83994e-09
89.8539	-3.74794e-08	89.6821	-8.14512e-09
89.9539	-3.44276e-08	89.7821	-9.671e-09
90.0539	-2.95448e-08	89.8821	-6.61924e-09
90.1539	-2.67982e-08	89.9821	-6.00889e-09
90.2539	-2.34413e-08	90.0821	-8.75547e-09
90.3539	-1.9474e-08	90.1821	-1.21124e-08
90.4539	-1.52015e-08	90.2821	-1.63849e-08
90.5539	-1.2455e-08	90.3821	-1.73004e-08
90.6539	-9.70838e-09	90.4821	-2.15729e-08
90.7539	-6.9618e-09	90.5821	-1.91314e-08
90.8539	-5.13074e-09	90.6821	-1.4859e-08
90.9539	-2.38416e-09	90.7821	-1.36383e-08
91.0539	6.67597e-10	90.8821	-1.33331e-08
91.1539	3.41418e-09	90.9821	-1.24176e-08
91.2539	5.85559e-09	91.0821	-1.18072e-08
91.3539	6.46594e-09	91.1821	-1.39435e-08
91.4539	8.60217e-09	91.2821	-1.18072e-08
91.5539	9.21252e-09	91.3821	-1.30279e-08
91.6539	1.04332e-08	91.4821	-1.27228e-08
91.7539	1.13487e-08	91.5821	-1.36383e-08
91.8539	1.22643e-08	91.6821	-1.60797e-08
91.9539	1.28746e-08	91.7821	-1.4859e-08
92.0539	1.3485e-08	91.8821	-1.45538e-08
92.1539	1.37902e-08	91.9821	-1.33331e-08
92.2539	1.47057e-08	92.0821	-1.45538e-08
92.3539	1.59264e-08	92.1821	-1.51642e-08
92.4539	1.62316e-08	92.2821	-1.57745e-08
92.5539	1.62316e-08	92.3821	-1.63849e-08
92.6539	1.47057e-08	92.4821	-1.69952e-08
92.7539	1.31798e-08	92.5821	-1.79107e-08
92.8539	1.22643e-08	92.6821	-1.82159e-08
92.9539	1.04332e-08	92.7821	-1.54693e-08
93.0539	7.07629e-09	92.8821	-1.45538e-08
93.1539	3.71935e-09	92.9821	-1.24176e-08
93.2539	-8.58282e-10	93.0821	-1.15021e-08
93.3539	-5.43592e-09	93.1821	-1.08917e-08
93.4539	-1.03187e-08	93.2821	-9.06065e-09
93.5539	-1.55067e-08	93.3821	-6.00889e-09
93.6539	-2.00844e-08	93.4821	-7.53477e-09
93.7539	-2.6493e-08	93.5821	-6.31407e-09
93.8539	-3.41224e-08	93.6821	-5.70371e-09
93.9539	-4.05311e-08	93.7821	-7.53477e-09
94.0539	-4.35829e-08	93.8821	-8.4503e-09
94.1539	-4.57191e-08	93.9821	-1.11969e-08
94.2539	-4.63295e-08	94.0821	-1.21124e-08
94.3539	-4.57191e-08	94.1821	-1.33331e-08
94.4539	-4.54139e-08	94.2821	-1.42486e-08
94.5539	-4.48036e-08	94.3821	-1.60797e-08
94.6539	-4.35829e-08	94.4821	-1.42486e-08
94.7539	-4.23622e-08	94.5821	-1.24176e-08
94.8539	-4.0226e-08	94.6821	-1.27228e-08
94.9539	-3.56483e-08	94.7821	-1.08917e-08
95.0539	-3.13759e-08	94.8821	-1.08917e-08
95.1539	-2.67982e-08	94.9821	-1.45538e-08
95.2539	-1.9474e-08	95.0821	-1.63849e-08
95.3539	-1.21498e-08	95.1821	-1.82159e-08
95.4539	-4.82557e-09	95.2821	-1.88263e-08
95.5539	3.109e-09	95.3821	-1.79107e-08
95.6539	1.0128e-08	95.4821	-1.51642e-08
95.7539	1.62316e-08	95.5821	-1.54693e-08
95.8539	2.08092e-08	95.6821	-1.79107e-08
95.9539	2.41661e-08	95.7821	-1.54693e-08
96.0539	2.59972e-08	95.8821	-1.36383e-08
96.1539	2.66075e-08	95.9821	-9.36582e-09
96.2539	2.66075e-08	96.0821	-1.24176e-08
96.3539	2.5692e-08	96.1821	-1.4859e-08
96.4539	2.44713e-08	96.2821	-1.57745e-08
96.5539	2.26403e-08	96.3821	-1.63849e-08
96.6539	2.11144e-08	96.4821	-1.63849e-08
96.7539	1.83678e-08	96.5821	-1.54693e-08
96.8539	1.74523e-08	96.6821	-1.60797e-08
96.9539	1.74523e-08	96.7821	-1.85211e-08
97.0539	1.50109e-08	96.8821	-2.06573e-08
97.1539	1.44005e-08	96.9821	-1.94366e-08
97.2539	1.40953e-08	97.0821	-1.88263e-08
97.3539	1.3485e-08	97.1821	-1.88263e-08
97.4539	1.3485e-08	97.2821	-2.0047e-08
97.5539	1.3485e-08	97.3821	-2.09625e-08
97.6539	1.3485e-08	97.4821	-1.91314e-08
97.7539	1.40953e-08	97.5821	-1.94366e-08
97.8539	1.31798e-08	97.6821	-2.03522e-08
97.9539	1.22643e-08	97.7821	-1.82159e-08
98.0539	1.13487e-08	97.8821	-1.76056e-08
98.1539	1.0128e-08	97.9821	-1.91314e-08
98.2539	1.04332e-08	98.0821	-1.88263e-08
98.3539	9.51769e-09	98.1821	-1.82159e-08
98.4539	7.99182e-09	98.2821	-1.60797e-08
98.5539	7.38146e-09	98.3821	-1.51642e-08
98.6539	4.94006e-09	98.4821	-1.45538e-08
98.7539	4.32971e-09	98.5821	-1.39435e-08
98.8539	2.80383e-09	98.6821	-1.36383e-08
98.9539	2.19348e-09	98.7821	-1.42486e-08
99.0539	3.62421e-10	98.8821	-1.4859e-08
99.1539	9.72773e-10	98.9821	-1.85211e-08
99.2539	-5.53106e-10	99.0821	-2.24884e-08
99.3539	1.27795e-09	99.1821	-2.79815e-08
99.4539	3.71935e-09	99.2821	-2.85919e-08
99.5539	4.94006e-09	99.3821	-2.85919e-08
99.6539	5.85559e-09	99.4821	-2.85919e-08
99.7539	6.16076e-09	99.5821	-2.85919e-08
99.8539	6.77111e-09	99.6821	-2.76764e-08
99.9539	6.77111e-09	99.7821	-2.88971e-08
100.054	5.85559e-09	99.8821	-3.25592e-08
100.154	6.46594e-09	99.9821	-3.07281e-08
100.254	6.16076e-09	100.082	-3.01178e-08
100.354	5.55041e-09	100.182	-3.0423e-08
100.454	4.63488e-09	100.282	-3.0423e-08
100.554	4.63488e-09	100.382	-2.03522e-08
100.654	5.24523e-09	100.482	6.80849e-09
100.754	4.63488e-09	100.582	6.99799e-08
100.854	4.02453e-09	100.682	3.08627e-07
100.954	3.109e-09	100.782	6.72397e-07
101.054	1.8883e-09	100.882	6.76059e-07
101.154	1.8883e-09	100.982	1.17746e-06
101.254	3.62421e-10	101.082	5.69247e-07
101.354	-8.58282e-10	101.182	4.95395e-07
101.454	-4.82557e-09	101.282	4.3497e-07
101.554	-5.74109e-09	101.382	2.62546e-07
101.654	-7.26697e-09	101.482	2.11887e-07
101.754	-9.09803e-09	101.582	1.52377e-07
101.854	-9.70838e-09	101.682	1.3895e-07
101.954	-8.79285e-09	101.782	1.0477e-07
102.054	-4.82557e-09	101.882	9.1037e-08
102.154	3.62606e-07	101.982	7.24213e-08
102.254	4.95947e-06	102.082	9.53095e-08
102.354	1.05652e-05	102.182	7.51679e-08
102.454	3.77203e-06	102.282	6.78436e-08
102.554	3.67743e-06	102.382	6.26557e-08
102.654	3.56756e-06	102.482	6.08246e-08
102.754	3.61029e-06	102.582	8.24921e-08
102.854	3.41589e-06	102.682	6.23505e-08
102.954	3.28711e-06	102.782	1.1301e-07
103.054	3.1336e-06	102.882	9.28681e-08
103.154	3.01855e-06	102.982	2.11518e-08
103.254	2.93982e-06	103.082	5.50263e-08
103.354	2.88427e-06	103.182	3.51898e-08
103.454	2.8327e-06	103.282	3.00019e-08
103.554	2.7799e-06	103.382	6.19814e-09
103.654	2.7323e-06	103.482	1.01015e-09
103.754	2.68835e-06	103.582	-2.40143e-08
103.854	2.65051e-06	103.682	-5.39854e-09
103.954	2.61267e-06	103.782	-4.48301e-09
104.054	2.58062e-06	103.882	-6.61924e-09
104.154	2.55407e-06	103.982	-1.88263e-08
104.254	2.52569e-06	104.082	-4.01886e-08
104.354	2.49731e-06	104.182	-6.27716e-08
104.454	2.4729e-06	104.282	-7.71148e-08
104.554	2.45184e-06	104.382	-5.69732e-08
104.654	2.42895e-06	104.482	-5.39215e-08
104.754	2.40545e-06	104.582	-3.7442e-08
104.854	2.38226e-06	104.682	-2.73712e-08
104.954	2.35846e-06	104.782	-2.76764e-08
105.054	2.33465e-06	104.882	-2.24884e-08
105.154	2.30963e-06	104.982	1.31533e-09
105.254	2.28918e-06	105.082	-1.21124e-08
105.354	2.26904e-06	105.182	-2.12677e-08
105.454	2.24951e-06	105.282	-3.28644e-08
105.554	2.23303e-06	105.382	-5.78888e-08
105.654	2.21869e-06	105.482	-6.7044e-08
105.754	2.20709e-06	105.582	-3.80523e-08
105.854	2.19946e-06	105.682	-4.78819e-09
105.954	2.19305e-06	105.782	7.41884e-09
106.054	2.1839e-06	105.882	-2.37091e-08
106.154	2.1784e-06	105.982	-3.37799e-08
106.254	2.17291e-06	106.082	-2.92022e-08
106.354	2.16711e-06	106.182	-3.31695e-08
106.454	2.15918e-06	106.282	-4.75128e-08
106.554	2.15124e-06	106.382	-5.36163e-08
106.654	2.14025e-06	106.482	-6.21612e-08
106.754	2.13079e-06	106.582	-6.27716e-08
106.854	2.12072e-06	106.682	-5.88043e-08
106.954	2.11065e-06	106.782	-5.69732e-08
107.054	2.10272e-06	106.882	-3.77472e-08
107.154	2.10516e-06	106.982	-1.79107e-08
107.254	2.11615e-06	107.082	-3.31695e-08
107.354	2.12683e-06	107.182	-5.17853e-08
107.454	2.12378e-06	107.282	-5.39215e-08
107.554	2.1073e-06	107.382	-5.08697e-08
107.654	2.09204e-06	107.482	-5.94147e-08
107.754	2.08319e-06	107.582	-5.45318e-08
107.854	2.07647e-06	107.682	-5.20904e-08
107.954	2.0722e-06	107.782	-6.46026e-08
108.054	2.0661e-06	107.882	-7.37579e-08
108.154	2.05664e-06	107.982	-6.76544e-08
108.254	2.04412e-06	108.082	-5.69732e-08
108.354	2.02948e-06	108.182	-5.39215e-08
108.454	2.01605e-06	108.282	-5.39215e-08
108.554	1.99987e-06	108.382	-5.4837e-08
108.654	1.98584e-06	108.482	-5.20904e-08
108.754	1.96875e-06	108.582	-5.02594e-08
108.854	1.95349e-06	108.682	-6.03302e-08
108.954	1.93243e-06	108.782	-4.87335e-08
109.054	1.90527e-06	108.882	-4.90387e-08
109.154	1.88086e-06	108.982	-6.91803e-08
109.254	1.86132e-06	109.082	-7.16217e-08
109.354	1.8479e-06	109.182	-7.37579e-08
109.454	1.8363e-06	109.282	-7.31476e-08
109.554	1.82592e-06	109.382	-7.16217e-08
109.654	1.82257e-06	109.482	-4.72076e-08
109.754	1.81982e-06	109.582	-1.76056e-08
109.854	1.81768e-06	109.682	5.89297e-09
109.954	1.81738e-06	109.782	2.38983e-08
110.054	1.81494e-06	109.882	3.64105e-08
110.154	1.81189e-06	109.982	3.70209e-08
110.254	1.80578e-06	110.082	4.25141e-08
110.354	1.8009e-06	110.182	3.97675e-08
110.454	1.7948e-06	110.282	3.51898e-08
110.554	1.78747e-06	110.382	8.94472e-09
110.654	1.78411e-06	110.482	-1.39435e-08
110.754	1.78411e-06	110.582	-2.79815e-08
110.854	1.7835e-06	110.682	-3.7442e-08
110.954	1.78991e-06	110.782	-4.90387e-08
111.054	1.79754e-06	110.882	-6.88751e-08
111.154	1.80151e-06	110.982	-8.23028e-08
111.254	1.80517e-06	111.082	-9.08478e-08
111.354	1.8067e-06	111.182	-8.01666e-08
111.454	1.80883e-06	111.282	-7.0401e-08
111.554	1.80944e-06	111.382	-6.73492e-08
111.654	1.80761e-06	111.482	-4.23248e-08
111.754	1.79846e-06	111.582	-1.21124e-08
111.854	1.78289e-06	111.682	8.0292e-09
111.954	1.75695e-06	111.782	2.84121e-09
112.054	1.72552e-06	111.882	-2.65196e-09
112.154	1.69195e-06	111.982	-1.51642e-08
112.254	1.66143e-06	112.082	-1.85211e-08
112.354	1.64007e-06	112.182	-1.30279e-08
112.454	1.62451e-06	112.282	-5.09336e-09
112.554	1.61535e-06	112.382	-2.1055e-10
112.654	1.60589e-06	112.482	-4.17784e-09
112.754	1.59857e-06	112.582	-5.09336e-09
112.854	1.59124e-06	112.682	-2.34678e-09
112.954	1.583e-06	112.782	-1.43125e-09
113.054	1.57721e-06	112.882	-3.87266e-09
113.154	1.56927e-06	112.982	-1.42486e-08
113.254	1.56256e-06	113.082	-2.24884e-08
113.354	1.55645e-06	113.182	-3.83575e-08
113.454	1.55005e-06	113.282	-5.02594e-08
113.554	1.54333e-06	113.382	-5.27008e-08
113.654	1.53723e-06	113.482	-5.14801e-08
113.754	1.53173e-06	113.582	-4.99542e-08
113.854	1.52685e-06	113.682	-7.77252e-08
113.954	1.52136e-06	113.782	-7.28424e-08
114.054	1.51983e-06	113.882	-5.75836e-08
114.154	1.51861e-06	113.982	-7.13165e-08
114.254	1.52014e-06	114.082	-8.32184e-08
114.354	1.52319e-06	114.182	-8.7796e-08
114.454	1.5296e-06	114.282	-7.742e-08
114.554	1.53479e-06	114.382	-5.81939e-08
114.654	1.53906e-06	114.482	-5.42267e-08
114.754	1.54486e-06	114.582	-5.33111e-08
114.854	1.54821e-06	114.682	-5.39215e-08
114.954	1.55096e-06	114.782	-4.75128e-08
115.054	1.55127e-06	114.882	-3.53058e-08
115.154	1.54821e-06	114.982	-4.20196e-08
115.254	1.54303e-06	115.082	-6.0025e-08
115.354	1.53418e-06	115.182	-6.91803e-08
115.454	1.52807e-06	115.282	-4.01886e-08
115.554	1.51922e-06	115.382	-2.40143e-08
115.654	1.51373e-06	115.482	-4.59869e-08
115.754	1.50824e-06	115.582	-5.33111e-08
115.854	1.50244e-06	115.682	-4.59869e-08
115.954	1.49755e-06	115.782	-4.56817e-08
116.054	1.49054e-06	115.882	-5.02594e-08
116.154	1.48535e-06	115.982	-5.69732e-08
116.254	1.48108e-06	116.082	-5.39215e-08
116.354	1.4768e-06	116.182	-5.57525e-08
116.454	1.47039e-06	116.282	-4.9649e-08
116.554	1.46521e-06	116.382	-7.68097e-08
116.654	1.45849e-06	116.482	-8.99322e-08
116.754	1.45361e-06	116.582	-7.19269e-08
116.854	1.44598e-06	116.682	-4.93439e-08
116.954	1.43988e-06	116.782	-3.59161e-08
117.054	1.43621e-06	116.882	-1.97418e-08
117.154	1.4295e-06	116.982	-1.54693e-08
117.254	1.4234e-06	117.082	-2.37091e-08
117.354	1.41668e-06	117.182	-3.43902e-08
117.454	1.41088e-06	117.282	-5.23956e-08
117.554	1.40478e-06	117.382	-7.77252e-08
117.654	1.40142e-06	117.482	-9.60357e-08
117.754	1.3941e-06	117.582	-1.07938e-07
117.854	1.38861e-06	117.682	-9.72564e-08
117.954	1.38098e-06	117.782	-9.60357e-08
118.054	1.37579e-06	117.882	-1.0397e-07
118.154	1.36969e-06	117.982	-9.96979e-08
118.254	1.36572e-06	118.082	-1.00308e-07
118.354	1.36297e-06	118.182	-1.0275e-07
118.454	1.36206e-06	118.282	-1.04581e-07
118.554	1.36206e-06	118.382	-1.01529e-07
118.654	1.36053e-06	118.482	-1.01529e-07
118.754	1.35839e-06	118.582	-1.08548e-07
118.854	1.35199e-06	118.682	-1.10684e-07
118.954	1.34649e-06	118.782	-1.03055e-07
119.054	1.34069e-06	118.882	-9.32892e-08
119.154	1.33429e-06	118.982	-1.02139e-07
119.254	1.33123e-06	119.082	-1.2045e-07
119.354	2.3316e-06	119.182	-1.10684e-07
119.454	2.61511e-06	119.282	-9.11529e-08
119.554	2.85162e-06	119.382	-8.32184e-08
119.654	2.8089e-06	119.482	-9.35943e-08
119.754	2.44848e-06	119.582	-1.01834e-07
119.854	2.40026e-06	119.682	-9.54254e-08
119.954	2.28979e-06	119.782	-9.38995e-08
120.054	2.1839e-06	119.882	2.10056e-07
120.154	2.16223e-06	119.982	4.94785e-07
120.254	2.10852e-06	120.082	3.59287e-07
120.354	2.10546e-06	120.182	5.26523e-07
120.454	2.09417e-06	120.282	7.03525e-07
120.554	2.07403e-06	120.382	5.51852e-07
120.654	2.02856e-06	120.482	6.44321e-07
120.754	1.99987e-06	120.582	4.06894e-07
120.854	1.98309e-06	120.682	3.96213e-07
120.954	1.97271e-06	120.782	4.10251e-07
121.054	1.9602e-06	120.882	4.16354e-07
121.154	1.94555e-06	120.982	4.06589e-07
121.254	1.94891e-06	121.082	3.83395e-07
121.354	1.93151e-06	121.182	3.77902e-07
121.454	1.90649e-06	121.282	3.82785e-07
121.554	1.8833e-06	121.382	3.96518e-07
121.654	1.86102e-06	121.482	3.95908e-07
121.754	1.82959e-06	121.582	3.86447e-07
121.854	1.8067e-06	121.682	3.64475e-07
121.954	1.79419e-06	121.782	3.35178e-07
122.054	1.78167e-06	121.882	3.129e-07
122.154	1.76703e-06	121.982	2.94589e-07
122.254	1.75756e-06	122.082	2.6926e-07
122.354	1.74322e-06	122.182	2.62241e-07
122.454	1.72705e-06	122.282	2.6102e-07
122.554	1.71392e-06	122.382	2.45151e-07
122.654	1.69744e-06	122.482	2.0853e-07
122.754	1.67913e-06	122.582	1.78012e-07
122.854	1.66723e-06	122.682	1.76486e-07
122.954	1.65869e-06	122.782	1.74655e-07
123.054	1.65442e-06	122.882	1.67331e-07
123.154	1.64557e-06	122.982	1.60007e-07
123.254	1.63671e-06	123.082	1.58176e-07
123.354	1.62481e-06	123.182	1.59702e-07
123.454	1.61566e-06	123.282	1.63669e-07
123.554	1.60833e-06	123.382	1.66415e-07
123.654	1.60345e-06	123.482	1.74655e-07
123.754	1.60406e-06	123.582	1.80148e-07
123.854	1.60406e-06	123.682	1.94797e-07
123.954	1.6065e-06	123.782	2.0853e-07
124.054	1.60376e-06	123.882	2.11276e-07
124.154	1.6004e-06	123.982	2.12497e-07
124.254	1.59643e-06	124.082	2.10971e-07
124.354	1.5888e-06	124.182	2.03952e-07
124.454	1.58178e-06	124.282	1.94186e-07
124.554	1.5711e-06	124.382	1.88693e-07
124.654	1.55737e-06	124.482	1.79538e-07
124.754	1.54455e-06	124.582	1.70078e-07
124.854	1.53204e-06	124.682	1.56955e-07
124.954	1.52136e-06	124.782	1.44748e-07
125.054	1.51159e-06	124.882	1.55734e-07
125.154	1.50183e-06	124.982	1.60617e-07
125.254	1.49511e-06	125.082	1.62448e-07
125.354	1.48779e-06	125.182	1.67026e-07
125.454	1.48077e-06	125.282	1.61227e-07
125.554	1.47406e-06	125.382	1.4902e-07
125.654	1.46826e-06	125.482	1.3132e-07
125.754	1.46246e-06	125.582	1.25522e-07
125.854	1.45575e-06	125.682	1.4902e-07
125.954	1.45178e-06	125.782	1.44443e-07
126.054	1.44751e-06	125.882	1.2186e-07
126.154	1.44384e-06	125.982	1.03244e-07
126.254	1.44079e-06	126.082	8.52387e-08
126.354	1.43286e-06	126.182	8.76801e-08
126.454	1.42675e-06	126.282	7.97455e-08
126.554	1.42157e-06	126.382	7.57782e-08
126.654	1.41699e-06	126.482	7.33368e-08
126.754	1.41058e-06	126.582	8.18817e-08
126.854	1.40478e-06	126.682	8.95111e-08
126.954	1.40142e-06	126.782	9.07318e-08
127.054	1.3999e-06	126.882	9.68353e-08
127.154	1.39959e-06	126.982	1.07517e-07
127.254	1.39502e-06	127.082	1.11789e-07
127.354	1.38769e-06	127.182	1.01718e-07
127.454	1.37854e-06	127.282	6.96747e-08
127.554	1.36572e-06	127.382	6.3266e-08
127.654	1.36145e-06	127.482	6.69281e-08
127.754	1.36053e-06	127.582	6.96747e-08
127.854	1.36023e-06	127.682	7.94403e-08
127.954	1.35778e-06	127.782	8.89008e-08
128.054	1.35839e-06	127.882	9.37836e-08
128.154	1.35504e-06	127.982	9.50043e-08
128.254	1.34954e-06	128.082	9.59198e-08
128.354	1.34405e-06	128.182	9.25629e-08
128.454	1.33337e-06	128.282	8.73749e-08
128.554	1.32025e-06	128.382	8.73749e-08
128.654	1.30896e-06	128.482	8.37128e-08
128.754	1.30255e-06	128.582	7.91352e-08
128.854	1.29828e-06	128.682	6.69281e-08
128.954	1.294e-06	128.782	5.83832e-08
129.054	1.29004e-06	128.882	5.56366e-08
129.154	1.28088e-06	128.982	5.74677e-08
129.254	1.27569e-06	129.082	6.26557e-08
129.354	1.276e-06	129.182	6.69281e-08
129.454	1.28332e-06	129.282	5.92987e-08
129.554	1.29187e-06	129.382	4.61762e-08
129.654	1.29461e-06	129.482	4.92279e-08
129.754	1.2998e-06	129.582	5.59418e-08
129.854	1.30285e-06	129.682	6.96747e-08
129.954	1.30896e-06	129.782	7.51679e-08
130.054	1.31201e-06	129.882	8.00507e-08
130.154	1.31384e-06	129.982	8.09662e-08
130.254	1.31689e-06	130.082	7.45575e-08
130.354	1.31842e-06	130.182	6.11298e-08
130.454	1.31659e-06	130.282	4.86176e-08
130.554	1.31811e-06	130.382	4.7702e-08
130.654	1.32147e-06	130.482	4.52606e-08
130.754	1.33276e-06	130.582	5.6247e-08
130.854	1.34649e-06	130.682	7.5473e-08
130.954	1.36023e-06	130.782	7.21161e-08
131.054	1.37487e-06	130.882	6.23505e-08
131.154	1.3822e-06	130.982	5.35004e-08
131.254	1.37915e-06	131.082	5.83832e-08
131.354	1.36847e-06	131.182	6.69281e-08
131.454	1.36328e-06	131.282	5.99091e-08
131.554	1.36328e-06	131.382	6.20453e-08
131.654	1.36328e-06	131.482	7.76093e-08
131.754	1.36633e-06	131.582	5.59418e-08
131.854	1.3706e-06	131.682	2.35932e-08
131.954	1.37762e-06	131.782	3.09174e-08
132.054	1.37793e-06	131.882	3.82416e-08
132.154	1.37701e-06	131.982	5.77728e-08
132.254	1.37487e-06	132.082	5.89936e-08
132.354	1.37396e-06	132.182	4.5871e-08
132.454	1.37793e-06	132.282	3.3664e-08
132.554	1.3822e-06	132.382	1.93207e-08
132.654	1.38708e-06	132.482	3.0307e-08
132.754	1.38983e-06	132.582	3.48847e-08
132.854	1.38983e-06	132.682	4.97744e-09
132.954	1.38342e-06	132.782	1.56586e-08
133.054	1.37152e-06	132.882	1.50482e-08
133.154	1.36175e-06	132.982	9.55507e-09
133.254	1.36084e-06	133.082	1.47431e-08
133.354	1.37243e-06	133.182	1.90155e-08
133.454	1.388e-06	133.282	2.14569e-08
133.554	1.40295e-06	133.382	2.38983e-08
133.654	1.40539e-06	133.482	3.00019e-08
133.754	1.3999e-06	133.582	2.20673e-08
133.854	1.39746e-06	133.682	2.11518e-08
133.954	1.39349e-06	133.782	1.81e-08
134.054	1.38922e-06	133.882	2.26776e-08
134.154	1.38433e-06	133.982	1.77948e-08
134.254	1.37609e-06	134.082	1.99311e-08
134.354	1.36572e-06	134.182	2.72553e-08
134.454	1.3526e-06	134.282	3.58002e-08
134.554	1.33612e-06	134.382	3.51898e-08
134.654	1.31414e-06	134.482	3.97675e-08
134.754	1.29034e-06	134.582	3.97675e-08
134.854	1.2641e-06	134.682	3.94623e-08
134.954	1.23388e-06	134.782	3.76312e-08
135.054	1.2052e-06	134.882	3.82416e-08
135.154	1.18139e-06	134.982	3.3664e-08
135.254	1.16369e-06	135.082	3.12226e-08
135.354	1.1521e-06	135.182	3.12226e-08
135.454	1.14447e-06	135.282	3.76312e-08
135.554	1.13806e-06	135.382	4.55658e-08
135.654	1.13501e-06	135.482	4.95331e-08
135.754	1.13256e-06	135.582	5.31952e-08
135.854	1.12829e-06	135.682	5.38056e-08
135.954	1.12616e-06	135.782	5.50263e-08
136.054	1.1231e-06	135.882	5.13642e-08
136.154	1.12371e-06	135.982	4.7702e-08
136.254	1.12768e-06	136.082	4.37348e-08
136.354	1.13165e-06	136.182	4.55658e-08
136.454	1.13348e-06	136.282	4.46503e-08
136.554	1.13806e-06	136.382	4.22089e-08
136.654	1.13897e-06	136.482	3.85468e-08
136.754	1.13958e-06	136.582	3.70209e-08
136.854	1.13958e-06	136.682	3.48847e-08
136.954	1.13989e-06	136.782	4.80072e-08
137.054	1.13897e-06	136.882	5.99091e-08
137.154	1.13928e-06	136.982	5.04486e-08
137.254	1.13989e-06	137.082	4.49555e-08
137.354	1.14019e-06	137.182	4.61762e-08
137.454	1.1405e-06	137.282	4.55658e-08
137.554	1.14447e-06	137.382	4.61762e-08
137.654	1.14782e-06	137.482	3.58002e-08
137.754	1.1521e-06	137.582	2.63397e-08
137.854	1.15271e-06	137.682	4.22089e-08
137.954	1.15179e-06	137.782	4.49555e-08
138.054	1.15057e-06	137.882	3.0307e-08
138.154	1.14843e-06	137.982	3.00019e-08
138.254	1.14538e-06	138.082	3.30536e-08
138.354	1.14325e-06	138.182	4.19037e-08
138.454	1.14172e-06	138.282	1.99311e-08
138.554	1.1405e-06	138.382	2.54242e-08
138.654	1.14019e-06	138.482	2.87811e-08
138.754	1.14203e-06	138.582	3.27484e-08
138.854	1.14203e-06	138.682	3.5495e-08
138.954	1.14447e-06	138.782	5.41107e-08
139.054	1.14294e-06	138.882	5.13642e-08
139.154	1.14233e-06	138.982	2.81708e-08
139.254	1.1405e-06	139.082	2.63397e-08
139.354	1.14019e-06	139.182	3.33588e-08
139.454	1.13714e-06	139.282	3.00019e-08
139.554	1.13317e-06	139.382	2.81708e-08
139.654	1.13073e-06	139.482	3.00019e-08
139.754	1.12524e-06	139.582	4.29172e-07
139.854	1.12188e-06	139.682	2.83298e-07
139.954	1.11914e-06	139.782	3.37314e-07
140.054	1.11853e-06	139.882	2.10056e-07
140.154	1.12188e-06	139.982	1.93271e-07
140.254	1.12799e-06	140.082	1.84116e-07
140.354	1.13867e-06	140.182	1.81064e-07
140.454	1.14538e-06	140.282	1.82285e-07
140.554	1.15454e-06	140.382	1.85031e-07
140.654	1.18963e-06	140.482	2.67429e-07
140.754	5.89972e-06	140.582	3.98959e-07
140.854	4.75164e-06	140.682	4.18796e-07
140.954	4.20538e-06	140.782	4.52975e-07
141.054	3.9002e-06	140.882	4.6091e-07
141.154	3.71099e-06	140.982	4.74033e-07
141.254	3.56451e-06	141.082	5.03329e-07
141.354	3.4516e-06	141.182	5.3873e-07
141.454	3.34906e-06	141.282	5.27438e-07
141.554	3.26422e-06	141.382	5.06992e-07
141.654	3.18914e-06	141.482	5.14926e-07
141.754	3.12841e-06	141.582	4.87766e-07
141.854	3.07135e-06	141.682	4.73727e-07
141.954	3.02282e-06	141.782	4.5206e-07
142.054	2.98162e-06	141.882	4.2612e-07
142.154	2.94561e-06	141.982	4.02927e-07
142.254	2.92547e-06	142.082	3.80649e-07
142.354	2.90686e-06	142.182	3.59897e-07
142.454	2.89221e-06	142.282	3.3884e-07
142.554	2.88671e-06	142.382	3.26938e-07
142.654	2.89465e-06	142.482	3.19614e-07
142.754	2.9273e-06	142.582	3.2236e-07
142.854	2.90411e-06	142.682	3.35788e-07
142.954	2.87725e-06	142.782	3.37009e-07
143.054	2.85254e-06	142.882	3.29379e-07
143.154	2.82598e-06	142.982	2.92453e-07
143.254	2.79882e-06	143.082	2.85129e-07
143.354	2.77716e-06	143.182	2.6102e-07
143.454	2.7564e-06	143.282	2.55527e-07
143.554	2.73565e-06	143.382	2.50949e-07
143.654	2.70849e-06	143.482	2.45151e-07
143.754	2.6853e-06	143.582	2.50339e-07
143.854	2.66455e-06	143.682	2.63767e-07
143.954	2.64807e-06	143.782	2.70175e-07
144.054	2.62548e-06	143.882	2.89401e-07
144.154	2.59497e-06	143.982	2.78415e-07
144.254	2.56323e-06	144.082	2.51254e-07
144.354	2.53851e-06	144.182	2.30808e-07
144.454	2.51837e-06	144.282	2.29282e-07
144.554	2.53027e-06	144.382	2.20432e-07
144.654	2.56689e-06	144.482	2.2623e-07
144.754	2.61206e-06	144.582	2.27145e-07
144.854	2.62945e-06	144.682	2.19821e-07
144.954	2.62793e-06	144.782	2.31113e-07
145.054	2.61511e-06	144.882	2.48203e-07
145.154	2.57849e-06	144.982	2.57358e-07
145.254	2.52417e-06	145.082	2.55222e-07
145.354	2.44818e-06	145.182	2.46982e-07
145.454	2.38348e-06	145.282	2.40878e-07
145.554	2.3374e-06	145.382	2.36301e-07
145.654	2.30261e-06	145.482	2.37216e-07
145.754	2.27758e-06	145.582	2.40878e-07
145.854	2.26812e-06	145.682	2.41183e-07
145.954	2.26873e-06	145.782	2.37521e-07
146.054	2.2611e-06	145.882	2.46677e-07
146.154	2.24981e-06	145.982	2.54611e-07
146.254	2.24707e-06	146.082	2.42099e-07
146.354	2.26171e-06	146.182	2.28671e-07
146.454	2.27911e-06	146.282	2.22263e-07
146.554	2.28064e-06	146.382	2.16464e-07
146.654	2.26843e-06	146.482	2.14328e-07
146.754	2.25164e-06	146.582	2.26535e-07
146.854	2.23181e-06	146.682	2.2562e-07
146.954	2.20526e-06	146.782	2.24704e-07
147.054	2.17627e-06	146.882	2.17075e-07
147.154	2.14819e-06	146.982	2.20126e-07
147.254	2.1253e-06	147.082	2.30502e-07
147.354	2.10943e-06	147.182	2.58884e-07
147.454	2.09753e-06	147.282	2.57663e-07
147.554	2.08624e-06	147.382	2.31418e-07
147.654	2.0722e-06	147.482	2.65903e-07
147.754	2.06182e-06	147.582	2.42709e-07
147.854	2.05664e-06	147.682	2.43625e-07
147.954	2.05114e-06	147.782	2.31418e-07
148.054	2.04809e-06	147.882	2.24094e-07
148.154	2.04168e-06	147.982	2.25925e-07
148.254	2.03436e-06	148.082	2.14328e-07
148.354	2.02917e-06	148.182	2.38132e-07
148.454	2.02795e-06	148.282	2.45456e-07
148.554	2.03497e-06	148.382	1.92966e-07
148.654	2.04046e-06	148.482	1.93271e-07
148.754	2.04443e-06	148.582	1.84116e-07
148.854	2.0426e-06	148.682	1.91135e-07
148.954	2.03802e-06	148.782	1.92966e-07
149.054	2.02948e-06	148.882	2.19821e-07
149.154	2.0191e-06	148.982	2.19516e-07
149.254	2.00476e-06	149.082	2.02121e-07
149.354	1.99469e-06	149.182	2.15244e-07
149.454	1.98584e-06	149.282	2.23483e-07
149.554	1.97546e-06	149.382	2.29587e-07
149.654	1.96539e-06	149.482	2.39658e-07
149.754	1.95715e-06	149.582	2.56442e-07
149.854	1.94891e-06	149.682	2.6041e-07
149.954	1.94067e-06	149.782	2.64072e-07
150.054	1.93151e-06	149.882	2.49423e-07
150.154	1.92144e-06	149.982	2.4393e-07
150.254	1.91137e-06	150.082	2.36606e-07
150.354	1.90435e-06	150.182	2.35385e-07
150.454	1.89703e-06	150.282	2.39963e-07
150.554	1.89825e-06	150.382	2.56137e-07
150.654	1.90924e-06	150.482	2.55527e-07
150.754	1.92968e-06	150.582	2.51254e-07
150.854	1.94555e-06	150.682	2.51559e-07
150.954	1.95166e-06	150.782	2.41183e-07
151.054	1.94738e-06	150.882	2.38742e-07
151.154	1.93518e-06	150.982	2.30808e-07
151.254	1.92328e-06	151.082	2.13412e-07
151.354	1.91442e-06	151.182	2.11581e-07
151.454	1.90893e-06	151.282	2.15854e-07
151.554	1.90222e-06	151.382	2.17685e-07
151.654	1.88726e-06	151.482	2.14633e-07
151.754	1.87017e-06	151.582	2.10361e-07
151.854	1.85156e-06	151.682	2.17075e-07
151.954	1.83477e-06	151.782	2.30502e-07
152.054	1.82257e-06	151.882	2.33554e-07
152.154	1.81524e-06	151.982	2.20126e-07
152.254	1.80975e-06	152.082	2.16769e-07
152.354	1.8067e-06	152.182	2.23788e-07
152.454	1.807e-06	152.282	2.2623e-07
152.554	1.80731e-06	152.382	2.29892e-07
152.654	1.80243e-06	152.482	2.56747e-07
152.754	1.79815e-06	152.582	2.76584e-07
152.854	1.79144e-06	152.682	2.82382e-07
152.954	1.79052e-06	152.782	2.75363e-07
153.054	1.7948e-06	152.882	2.64072e-07
153.154	1.80273e-06	152.982	2.43015e-07
153.254	1.81128e-06	153.082	2.14328e-07
153.354	1.81341e-06	153.182	2.03647e-07
153.454	1.8125e-06	153.282	2.15854e-07
153.554	1.80517e-06	153.382	2.14633e-07
153.654	1.79724e-06	153.482	2.03647e-07
153.754	1.78595e-06	153.582	2.02731e-07
153.854	1.77801e-06	153.682	2.17685e-07
153.954	1.7713e-06	153.782	2.32944e-07
154.054	1.76306e-06	153.882	2.32639e-07
154.154	1.75451e-06	153.982	2.2562e-07
154.254	1.74841e-06	154.082	2.13718e-07
154.354	1.74047e-06	154.182	2.0853e-07
154.454	1.73407e-06	154.282	2.24399e-07
154.554	1.72766e-06	154.382	2.36606e-07
154.654	1.72125e-06	154.482	2.49423e-07
154.754	1.71423e-06	154.582	2.59189e-07
154.854	1.71087e-06	154.682	2.53085e-07
154.954	1.70355e-06	154.782	2.32944e-07
155.054	1.69836e-06	154.882	2.13412e-07
155.154	1.69134e-06	154.982	2.08835e-07
155.254	1.68524e-06	155.082	1.96933e-07
155.354	1.68097e-06	155.182	1.84116e-07
155.454	1.67334e-06	155.282	1.7496e-07
155.554	1.66967e-06	155.382	1.70383e-07
155.654	1.66235e-06	155.482	1.70688e-07
155.754	1.65899e-06	155.582	1.71603e-07
155.854	1.6535e-06	155.682	1.63974e-07
155.954	1.6474e-06	155.782	2.04562e-07
[truncated: 500 more rows]

## Sheet: Figure 4 (d)
0.79988	-8.25745e-07	0.80488	-6.44553e-08		0	0.085	0.085
0.80988	-8.07434e-07	0.81488	-8.27658e-08		10	2.01	0.533
0.81988	-7.61658e-07	0.82488	-9.80246e-08		20	2.11	0.546
0.82988	-7.55554e-07	0.83488	-1.01076e-07		30	2.794	0.697
0.83988	-7.18933e-07	0.84488	-1.0718e-07		40	2.849	0.735
0.84988	-7.41211e-07	0.85488	-1.27321e-07		50	2.879	0.745
0.85988	-7.10388e-07	0.86488	-1.31899e-07		60	2.989	1.038
0.86988	-7.17407e-07	0.87488	-1.34035e-07
0.87988	-6.88721e-07	0.88488	-1.37087e-07
0.88988	-6.9574e-07	0.89488	-1.38003e-07
0.89988	-5.36224e-07	0.90488	-7.11274e-09
0.90988	-5.44647e-07	0.91488	-7.32636e-09
0.91988	-5.22339e-07	0.92488	-9.6457e-09
0.92988	-5.33478e-07	0.93488	-1.03476e-08
0.93988	-5.06988e-07	0.94488	-1.11411e-08
0.94988	-5.15991e-07	0.95488	-1.1843e-08
0.95988	-4.95758e-07	0.96488	-1.37351e-08
0.96988	-5.13275e-07	0.97488	-1.2789e-08
0.97988	-4.9057e-07	0.98488	-1.47116e-08
0.98988	-5.03754e-07	0.99488	-1.45895e-08
0.99988	-4.81171e-07	1.00488	-1.63596e-08
1.00988	-4.96674e-07	1.01488	-1.62985e-08
1.01988	-4.75342e-07	1.02488	-1.72446e-08
1.02988	-4.89624e-07	1.03488	-1.61154e-08
1.03988	-4.67621e-07	1.04488	-1.71835e-08
1.04988	-4.82971e-07	1.05488	-1.72751e-08
1.05988	-4.64294e-07	1.06488	-1.95639e-08
1.06988	-4.7821e-07	1.07488	-1.85568e-08
1.07988	-4.59717e-07	1.08488	-1.92282e-08
1.08988	-4.74579e-07	1.09488	-1.92282e-08
1.09988	-4.54224e-07	1.10488	-2.09067e-08
1.10988	-4.7113e-07	1.11488	-1.93808e-08
1.11988	-4.49158e-07	1.12488	-2.07541e-08
1.12988	-4.66064e-07	1.13488	-1.95944e-08
1.13988	-4.46258e-07	1.14488	-2.12729e-08
1.14988	-4.61792e-07	1.15488	-2.08151e-08
1.15988	-4.44305e-07	1.16488	-2.17001e-08
1.16988	-4.60083e-07	1.17488	-2.07236e-08
1.17988	-4.39789e-07	1.18488	-2.20969e-08
1.18988	-4.56787e-07	1.19488	-2.13644e-08
1.19988	-4.37897e-07	1.20488	-2.26767e-08
1.20988	-4.54681e-07	1.21488	-2.18222e-08
1.21988	-4.33289e-07	1.22488	-2.35007e-08
1.22988	-4.51752e-07	1.23488	-2.22495e-08
1.23988	-4.33258e-07	1.24488	-2.33481e-08
1.24988	-4.49921e-07	1.25488	-2.3165e-08
1.25988	-4.29748e-07	1.26488	-2.36838e-08
1.26988	-4.46289e-07	1.27488	-2.34702e-08
1.27988	-4.2746e-07	1.28488	-2.40805e-08
1.28988	-4.45557e-07	1.29488	-2.37448e-08
1.29988	-4.23218e-07	1.30488	-2.47214e-08
1.30988	-4.42657e-07	1.31488	-2.37448e-08
1.31988	-4.24835e-07	1.32488	-2.50266e-08
1.32988	-4.42322e-07	1.33488	-2.31955e-08
1.33988	-4.22882e-07	1.34488	-2.52402e-08
1.34988	-4.39178e-07	1.35488	-2.39279e-08
1.35988	-4.21112e-07	1.36488	-2.47519e-08
1.36988	-4.36249e-07	1.37488	-2.33786e-08
1.37988	-4.1864e-07	1.38488	-2.49655e-08
1.38988	-4.34509e-07	1.39488	-2.35922e-08
1.39988	-4.17694e-07	1.40488	-2.50266e-08
1.40988	-4.34021e-07	1.41488	-2.34702e-08
1.41988	-4.14184e-07	1.42488	-2.48129e-08
1.42988	-4.31335e-07	1.43488	-2.43552e-08
1.43988	-4.13238e-07	1.44488	-2.56979e-08
1.44988	-4.31732e-07	1.45488	-2.38059e-08
1.45988	-4.11835e-07	1.46488	-2.52707e-08
1.46988	-4.28802e-07	1.47488	-2.41415e-08
1.47988	-4.08813e-07	1.48488	-2.47519e-08
1.48988	-4.28009e-07	1.49488	-2.34702e-08
1.49988	-4.1095e-07	1.50488	-2.56979e-08
1.50988	-4.27154e-07	1.51488	-2.35617e-08
1.51988	-4.07288e-07	1.52488	-2.47519e-08
1.52988	-4.24713e-07	1.53488	-2.32871e-08
1.53988	-4.05243e-07	1.54488	-2.48129e-08
1.54988	-4.22699e-07	1.55488	-2.35922e-08
1.55988	-4.06036e-07	1.56488	-2.43857e-08
1.56988	-4.19891e-07	1.57488	-2.39279e-08
1.57988	-4.02801e-07	1.58488	-2.46603e-08
1.58988	-4.20746e-07	1.59488	-2.33176e-08
1.59988	-4.01764e-07	1.60488	-2.47519e-08
1.60988	-4.198e-07	1.61488	-2.38669e-08
1.61988	-4.00452e-07	1.62488	-2.50876e-08
1.62988	-4.17694e-07	1.63488	-2.39279e-08
1.63988	-4.00055e-07	1.64488	-2.50571e-08
1.64988	-4.17297e-07	1.65488	-2.35922e-08
1.65988	-3.97095e-07	1.66488	-2.50571e-08
1.66988	-4.14703e-07	1.67488	-2.40805e-08
1.67988	-3.97858e-07	1.68488	-2.45383e-08
1.68988	-4.1507e-07	1.69488	-2.41721e-08
1.69988	-3.94714e-07	1.70488	-2.51181e-08
1.70988	-4.12781e-07	1.71488	-2.31955e-08
1.71988	-3.94287e-07	1.72488	-2.53622e-08
1.72988	-4.10919e-07	1.73488	-2.40805e-08
1.73988	-3.93585e-07	1.74488	-2.53012e-08
1.74988	-4.08142e-07	1.75488	-2.46603e-08
1.75988	-3.9093e-07	1.76488	-2.53622e-08
1.76988	-4.07379e-07	1.77488	-2.405e-08
1.77988	-3.89343e-07	1.78488	-2.53622e-08
1.78988	-4.06586e-07	1.79488	-2.43552e-08
1.79988	-3.88519e-07	1.80488	-2.54233e-08
1.80988	-4.05426e-07	1.81488	-2.38364e-08
1.81988	-3.87543e-07	1.82488	-2.45993e-08
1.82988	-4.04938e-07	1.83488	-2.43857e-08
1.83988	-3.85406e-07	1.84488	-2.49655e-08
1.84988	-4.03107e-07	1.85488	-2.39584e-08
1.85988	-3.84369e-07	1.86488	-2.59116e-08
1.86988	-4.02588e-07	1.87488	-2.43552e-08
1.87988	-3.85651e-07	1.88488	-2.55454e-08
1.88988	-4.03717e-07	1.89488	-2.43552e-08
1.89988	-3.83362e-07	1.90488	-2.582e-08
1.90988	-4.01367e-07	1.91488	-2.41415e-08
1.91988	-3.83301e-07	1.92488	-2.57895e-08
1.92988	-4.00787e-07	1.93488	-2.47519e-08
1.93988	-3.79944e-07	1.94488	-2.61252e-08
1.94988	-3.99017e-07	1.95488	-2.49045e-08
1.95988	-3.8266e-07	1.96488	-2.56674e-08
1.96988	-3.98285e-07	1.97488	-2.50266e-08
1.97988	-3.80951e-07	1.98488	-2.59421e-08
1.98988	-3.97034e-07	1.99488	-2.46603e-08
1.99988	-3.79944e-07	2.00488	-2.55759e-08
2.00988	-3.97278e-07	2.01488	-2.47519e-08
2.01988	-3.7912e-07	2.02488	-2.61862e-08
2.02988	-3.97339e-07	2.03488	-2.4996e-08
2.03988	-3.77472e-07	2.04488	-2.60031e-08
2.04988	-3.93616e-07	2.05488	-2.44467e-08
2.05988	-3.7677e-07	2.06488	-2.5759e-08
2.06988	-3.9444e-07	2.07488	-2.52707e-08
2.07988	-3.75946e-07	2.08488	-2.51791e-08
2.08988	-3.92578e-07	2.09488	-2.41721e-08
2.09988	-3.74481e-07	2.10488	-2.59421e-08
2.10988	-3.92853e-07	2.11488	-2.51181e-08
2.11988	-3.7616e-07	2.12488	-2.6705e-08
2.12988	-3.91052e-07	2.13488	-2.57285e-08
2.13988	-3.73566e-07	2.14488	-2.65219e-08
2.14988	-3.89526e-07	2.15488	-2.52097e-08
2.15988	-3.72986e-07	2.16488	-2.582e-08
2.16988	-3.89618e-07	2.17488	-2.53928e-08
2.17988	-3.69049e-07	2.18488	-2.64914e-08
2.18988	-3.89831e-07	2.19488	-2.51181e-08
2.19988	-3.72711e-07	2.20488	-2.63693e-08
2.20988	-3.8974e-07	2.21488	-2.56674e-08
2.21988	-3.7088e-07	2.22488	-2.64609e-08
2.22988	-3.90015e-07	2.23488	-2.52707e-08
2.23988	-3.71185e-07	2.24488	-2.63693e-08
2.24988	-3.90198e-07	2.25488	-2.53622e-08
2.25988	-3.71551e-07	2.26488	-2.67661e-08
2.26988	-3.88458e-07	2.27488	-2.50876e-08
2.27988	-3.70544e-07	2.28488	-2.63998e-08
2.28988	-3.88794e-07	2.29488	-2.53012e-08
2.29988	-3.70209e-07	2.30488	-2.59726e-08
2.30988	-3.88733e-07	2.31488	-2.53928e-08
2.31988	-3.70239e-07	2.32488	-2.71323e-08
2.32988	-3.89007e-07	2.33488	-2.57285e-08
2.33988	-3.70392e-07	2.34488	-2.69186e-08
2.34988	-3.87695e-07	2.35488	-2.4935e-08
2.35988	-3.68835e-07	2.36488	-2.68881e-08
2.36988	-3.85254e-07	2.37488	-2.46909e-08
2.37988	-3.68988e-07	2.38488	-2.72238e-08
2.38988	-3.86505e-07	2.39488	-2.54233e-08
2.39988	-3.67279e-07	2.40488	-2.59726e-08
2.40988	-3.87482e-07	2.41488	-2.6583e-08
2.41988	-3.68286e-07	2.42488	-2.6583e-08
2.42988	-3.84521e-07	2.43488	-2.53928e-08
2.43988	-3.6792e-07	2.44488	-2.67661e-08
2.44988	-3.85284e-07	2.45488	-2.59726e-08
2.45988	-3.68347e-07	2.46488	-2.6644e-08
2.46988	-3.84827e-07	2.47488	-2.51791e-08
2.47988	-3.66516e-07	2.48488	-2.71323e-08
2.48988	-3.84216e-07	2.49488	-2.55148e-08
2.49988	-3.65478e-07	2.50488	-2.71323e-08
2.50988	-3.86169e-07	2.51488	-2.54233e-08
2.51988	-3.65936e-07	2.52488	-2.72849e-08
2.52988	-3.83881e-07	2.53488	-2.56979e-08
2.53988	-3.65021e-07	2.54488	-2.65524e-08
2.54988	-3.83789e-07	2.55488	-2.54538e-08
2.55988	-3.63312e-07	2.56488	-2.71933e-08
2.56988	-3.82751e-07	2.57488	-2.57895e-08
2.57988	-3.64258e-07	2.58488	-2.67355e-08
2.58988	-3.83148e-07	2.59488	-2.60336e-08
2.59988	-3.65753e-07	2.60488	-2.70407e-08
2.60988	-3.83087e-07	2.61488	-2.55148e-08
2.61988	-3.6496e-07	2.62488	-2.67661e-08
2.62988	-3.83179e-07	2.63488	-2.60642e-08
2.63988	-3.64624e-07	2.64488	-2.70102e-08
2.64988	-3.815e-07	2.65488	-2.53622e-08
2.65988	-3.63586e-07	2.66488	-2.71018e-08
2.66988	-3.83118e-07	2.67488	-2.60031e-08
2.67988	-3.64075e-07	2.68488	-2.69492e-08
2.68988	-3.83209e-07	2.69488	-2.5759e-08
2.69988	-3.63769e-07	2.70488	-2.69492e-08
2.70988	-3.82751e-07	2.71488	-2.5881e-08
2.71988	-3.64654e-07	2.72488	-2.71018e-08
2.72988	-3.82568e-07	2.73488	-2.63388e-08
2.73988	-3.61938e-07	2.74488	-2.76205e-08
2.74988	-3.81958e-07	2.75488	-2.65219e-08
2.75988	-3.62671e-07	2.76488	-2.65219e-08
2.76988	-3.80798e-07	2.77488	-2.64914e-08
2.77988	-3.63586e-07	2.78488	-2.65219e-08
2.78988	-3.81073e-07	2.79488	-2.67966e-08
2.79988	-3.62122e-07	2.80488	-2.68271e-08
2.80988	-3.80859e-07	2.81488	-2.62473e-08
2.81988	-3.63037e-07	2.82488	-2.68881e-08
2.82988	-3.80157e-07	2.83488	-2.61862e-08
2.83988	-3.61359e-07	2.84488	-2.69186e-08
2.84988	-3.80615e-07	2.85488	-2.63388e-08
2.85988	-3.62274e-07	2.86488	-2.69492e-08
2.86988	-3.79822e-07	2.87488	-2.60031e-08
2.87988	-3.61694e-07	2.88488	-2.63388e-08
2.88988	-3.80493e-07	2.89488	-2.60336e-08
2.89988	-3.62945e-07	2.90488	-2.69492e-08
2.90988	-3.78906e-07	2.91488	-2.5759e-08
2.91988	-3.59161e-07	2.92488	-2.69186e-08
2.92988	-3.78693e-07	2.93488	-2.55454e-08
2.93988	-3.60748e-07	2.94488	-2.69797e-08
2.94988	-3.77197e-07	2.95488	-2.56979e-08
2.95988	-3.59589e-07	2.96488	-2.64304e-08
2.96988	-3.78601e-07	2.97488	-2.61862e-08
2.97988	-3.5965e-07	2.98488	-2.65219e-08
2.98988	-3.77594e-07	2.99488	-2.56979e-08
2.99988	-3.58795e-07	3.00488	-2.71628e-08
3.00988	-3.77045e-07	3.01488	-2.53622e-08
3.01988	-3.58063e-07	3.02488	-2.73764e-08
3.02988	-3.77014e-07	3.03488	-2.53928e-08
3.03988	-3.56628e-07	3.04488	-2.66135e-08
3.04988	-3.76495e-07	3.05488	-2.62778e-08
3.05988	-3.58124e-07	3.06488	-2.70102e-08
3.06988	-3.71918e-07	3.07488	-2.59116e-08
3.07988	-3.58948e-07	3.08488	-2.72849e-08
3.08988	-3.75458e-07	3.09488	-2.60642e-08
3.09988	-3.57178e-07	3.10488	-2.69186e-08
3.10988	-3.74054e-07	3.11488	-2.62778e-08
3.11988	-3.5788e-07	3.12488	-2.67355e-08
3.12988	-3.78113e-07	3.13488	-2.62778e-08
3.13988	-3.59009e-07	3.14488	-2.5759e-08
3.14988	-3.74573e-07	3.15488	-2.55759e-08
3.15988	-3.55926e-07	3.16488	-2.64609e-08
3.16988	-3.72986e-07	3.17488	-2.63083e-08
3.17988	-3.57452e-07	3.18488	-2.77426e-08
3.18988	-3.75153e-07	3.19488	-2.59116e-08
3.19988	-3.55652e-07	3.20488	-2.6583e-08
3.20988	-3.74023e-07	3.21488	-2.55759e-08
3.21988	-3.57788e-07	3.22488	-2.64914e-08
3.22988	-3.7442e-07	3.23488	-2.60947e-08
3.23988	-3.55133e-07	3.24488	-2.59726e-08
3.24988	-3.73016e-07	3.25488	-2.57895e-08
3.25988	-3.54401e-07	3.26488	-2.63693e-08
3.26988	-3.7503e-07	3.27488	-2.54233e-08
3.27988	-3.55896e-07	3.28488	-2.59421e-08
3.28988	-3.72864e-07	3.29488	-2.51181e-08
3.29988	-3.53699e-07	3.30488	-2.68271e-08
3.30988	-3.72955e-07	3.31488	-2.53317e-08
3.31988	-3.54645e-07	3.32488	-2.65524e-08
3.32988	-3.72833e-07	3.33488	-2.62778e-08
3.33988	-3.55591e-07	3.34488	-2.67661e-08
3.34988	-3.71643e-07	3.35488	-2.5881e-08
3.35988	-3.53271e-07	3.36488	-2.7468e-08
3.36988	-3.7265e-07	3.37488	-2.59421e-08
3.37988	-3.56262e-07	3.38488	-2.76205e-08
3.38988	-3.73321e-07	3.39488	-2.56369e-08
3.39988	-3.53973e-07	3.40488	-2.70102e-08
3.40988	-3.71857e-07	3.41488	-2.58505e-08
3.41988	-3.54797e-07	3.42488	-2.79868e-08
3.42988	-3.7146e-07	3.43488	-2.57285e-08
3.43988	-3.53882e-07	3.44488	-2.65524e-08
3.44988	-3.70789e-07	3.45488	-2.55148e-08
3.45988	-3.52997e-07	3.46488	-2.68881e-08
3.46988	-3.71429e-07	3.47488	-2.53317e-08
3.47988	-3.53668e-07	3.48488	-2.67966e-08
3.48988	-3.7146e-07	3.49488	-2.56369e-08
3.49988	-3.53119e-07	3.50488	-2.78037e-08
3.50988	-3.70972e-07	3.51488	-2.61557e-08
3.51988	-3.52508e-07	3.52488	-2.82004e-08
3.52988	-3.70697e-07	3.53488	-2.56064e-08
3.53988	-3.52966e-07	3.54488	-2.66135e-08
3.54988	-3.68774e-07	3.55488	-2.62778e-08
3.55988	-3.51959e-07	3.56488	-2.72238e-08
3.56988	-3.71399e-07	3.57488	-2.54538e-08
3.57988	-3.50006e-07	3.58488	-2.69186e-08
3.58988	-3.70331e-07	3.59488	-2.64304e-08
3.59988	-3.51929e-07	3.60488	-2.74985e-08
3.60988	-3.68378e-07	3.61488	-2.61862e-08
3.61988	-3.50677e-07	3.62488	-2.70407e-08
3.62988	-3.69415e-07	3.63488	-2.61862e-08
3.63988	-3.51623e-07	3.64488	-2.76816e-08
3.64988	-3.68896e-07	3.65488	-2.63083e-08
3.65988	-3.5025e-07	3.66488	-2.61557e-08
3.66988	-3.68744e-07	3.67488	-2.58505e-08
3.67988	-3.49152e-07	3.68488	-2.73764e-08
3.68988	-3.68317e-07	3.69488	-2.59421e-08
3.69988	-3.48541e-07	3.70488	-2.65524e-08
3.70988	-3.68164e-07	3.71488	-2.64609e-08
3.71988	-3.49274e-07	3.72488	-2.74985e-08
3.72988	-3.66272e-07	3.73488	-2.65524e-08
3.73988	-3.48358e-07	3.74488	-2.7468e-08
3.74988	-3.65631e-07	3.75488	-2.69492e-08
3.75988	-3.4787e-07	3.76488	-2.6644e-08
3.76988	-3.60474e-07	3.77488	-2.56979e-08
3.77988	-3.44635e-07	3.78488	-2.72849e-08
3.78988	-3.64807e-07	3.79488	-2.61862e-08
3.79988	-3.47992e-07	3.80488	-2.5881e-08
3.80988	-3.66089e-07	3.81488	-2.64304e-08
3.81988	-3.45764e-07	3.82488	-2.72849e-08
3.82988	-3.65478e-07	3.83488	-2.5881e-08
3.83988	-3.45154e-07	3.84488	-2.66135e-08
3.84988	-3.64044e-07	3.85488	-2.5881e-08
3.85988	-3.45856e-07	3.86488	-2.72849e-08
3.86988	-3.62854e-07	3.87488	-2.59421e-08
3.87988	-3.47137e-07	3.88488	-2.759e-08
3.88988	-3.64746e-07	3.89488	-2.5759e-08
3.89988	-3.45001e-07	3.90488	-2.69797e-08
3.90988	-3.65936e-07	3.91488	-2.63388e-08
3.91988	-3.4671e-07	3.92488	-2.68576e-08
3.92988	-3.63861e-07	3.93488	-2.59421e-08
3.93988	-3.461e-07	3.94488	-2.70407e-08
3.94988	-3.62427e-07	3.95488	-2.60031e-08
3.95988	-3.45886e-07	3.96488	-2.72543e-08
3.96988	-3.6322e-07	3.97488	-2.56064e-08
3.97988	-3.46771e-07	3.98488	-2.68576e-08
3.98988	-3.63251e-07	3.99488	-2.5881e-08
3.99988	-3.44849e-07	4.00488	-2.67355e-08
4.00988	-3.64136e-07	4.01488	-2.63388e-08
4.01988	-3.46008e-07	4.02488	-2.68881e-08
4.02988	-3.63892e-07	4.03488	-2.61252e-08
4.03988	-3.45764e-07	4.04488	-2.70102e-08
4.04988	-3.63586e-07	4.05488	-2.6583e-08
4.05988	-3.4494e-07	4.06488	-2.6644e-08
4.06988	-3.64197e-07	4.07488	-2.56064e-08
4.07988	-3.44269e-07	4.08488	-2.63693e-08
4.08988	-3.63922e-07	4.09488	-2.63388e-08
4.09988	-3.46008e-07	4.10488	-2.64914e-08
4.10988	-3.62091e-07	4.11488	-2.64609e-08
4.11988	-3.45306e-07	4.12488	-2.65524e-08
4.12988	-3.64105e-07	4.13488	-2.53622e-08
4.13988	-3.42804e-07	4.14488	-2.62167e-08
4.14988	-3.62823e-07	4.15488	-2.53012e-08
4.15988	-3.45245e-07	4.16488	-2.69492e-08
4.16988	-3.6441e-07	4.17488	-2.51791e-08
4.17988	-3.45795e-07	4.18488	-2.63083e-08
4.18988	-3.63586e-07	4.19488	-2.54233e-08
4.19988	-3.45123e-07	4.20488	-2.61862e-08
4.20988	-3.64197e-07	4.21488	-2.51791e-08
4.21988	-3.45367e-07	4.22488	-2.66745e-08
4.22988	-3.64563e-07	4.23488	-2.4935e-08
4.23988	-3.46374e-07	4.24488	-2.69492e-08
4.24988	-3.63953e-07	4.25488	-2.57285e-08
4.25988	-3.4552e-07	4.26488	-2.70102e-08
4.26988	-3.60474e-07	4.27488	-2.61252e-08
4.27988	-3.44574e-07	4.28488	-2.60947e-08
4.28988	-3.63403e-07	4.29488	-2.53622e-08
4.29988	-3.47107e-07	4.30488	-2.6705e-08
4.30988	-3.64349e-07	4.31488	-2.53317e-08
4.31988	-3.45093e-07	4.32488	-2.6644e-08
4.32988	-3.64044e-07	4.33488	-2.53622e-08
4.33988	-3.46435e-07	4.34488	-2.60947e-08
4.34988	-3.63312e-07	4.35488	-2.56064e-08
4.35988	-3.4552e-07	4.36488	-2.69492e-08
4.36988	-3.65112e-07	4.37488	-2.54538e-08
4.37988	-3.4433e-07	4.38488	-2.60642e-08
4.38988	-3.65387e-07	4.39488	-2.53317e-08
4.39988	-3.45337e-07	4.40488	-2.63388e-08
4.40988	-3.63678e-07	4.41488	-2.50266e-08
4.41988	-3.46191e-07	4.42488	-2.59421e-08
4.42988	-3.6499e-07	4.43488	-2.55148e-08
4.43988	-3.44696e-07	4.44488	-2.65219e-08
4.44988	-3.62854e-07	4.45488	-2.61252e-08
4.45988	-3.44025e-07	4.46488	-2.68271e-08
4.46988	-3.62396e-07	4.47488	-2.59421e-08
4.47988	-3.44726e-07	4.48488	-2.61557e-08
4.48988	-3.62945e-07	4.49488	-2.57285e-08
4.49988	-3.43811e-07	4.50488	-2.59421e-08
4.50988	-3.62488e-07	4.51488	-2.55759e-08
4.51988	-3.42712e-07	4.52488	-2.61557e-08
4.52988	-3.6322e-07	4.53488	-2.53928e-08
4.53988	-3.43231e-07	4.54488	-2.6644e-08
4.54988	-3.63556e-07	4.55488	-2.56064e-08
4.55988	-3.45886e-07	4.56488	-2.67355e-08
4.56988	-3.6084e-07	4.57488	-2.53622e-08
4.57988	-3.43536e-07	4.58488	-2.60642e-08
4.58988	-3.62732e-07	4.59488	-2.5881e-08
4.59988	-3.42529e-07	4.60488	-2.63693e-08
4.60988	-3.60901e-07	4.61488	-2.5759e-08
4.61988	-3.42712e-07	4.62488	-2.63388e-08
4.62988	-3.59802e-07	4.63488	-2.57895e-08
4.63988	-3.4198e-07	4.64488	-2.56369e-08
4.64988	-3.59375e-07	4.65488	-2.60336e-08
4.65988	-3.43018e-07	4.66488	-2.6583e-08
4.66988	-3.61359e-07	4.67488	-2.57895e-08
4.67988	-3.414e-07	4.68488	-2.64304e-08
4.68988	-3.61999e-07	4.69488	-2.53317e-08
4.69988	-3.41186e-07	4.70488	-2.57285e-08
4.70988	-3.59558e-07	4.71488	-2.50571e-08
4.71988	-3.4137e-07	4.72488	-2.63083e-08
4.72988	-3.58337e-07	4.73488	-2.59726e-08
4.73988	-3.40118e-07	4.74488	-2.62778e-08
4.74988	-3.58276e-07	4.75488	-2.56369e-08
4.75988	-3.38989e-07	4.76488	-2.60947e-08
4.76988	-3.5849e-07	4.77488	-2.56064e-08
4.77988	-3.38562e-07	4.78488	-2.62778e-08
4.78988	-3.57147e-07	4.79488	-2.49655e-08
4.79988	-3.39661e-07	4.80488	-2.60947e-08
4.80988	-3.55438e-07	4.81488	-2.56674e-08
4.81988	-3.37646e-07	4.82488	-2.61557e-08
4.82988	-3.55347e-07	4.83488	-2.54538e-08
4.83988	-3.36761e-07	4.84488	-2.60642e-08
4.84988	-3.55194e-07	4.85488	-2.54538e-08
4.85988	-3.36945e-07	4.86488	-2.55759e-08
4.86988	-3.55255e-07	4.87488	-2.55148e-08
4.87988	-3.36578e-07	4.88488	-2.63693e-08
4.88988	-3.55804e-07	4.89488	-2.52097e-08
4.89988	-3.36243e-07	4.90488	-2.6705e-08
4.90988	-3.55682e-07	4.91488	-2.53317e-08
4.91988	-3.367e-07	4.92488	-2.59116e-08
4.92988	-3.56872e-07	4.93488	-2.55148e-08
4.93988	-3.37463e-07	4.94488	-2.64914e-08
4.94988	-3.5553e-07	4.95488	-2.51791e-08
4.95988	-3.36914e-07	4.96488	-2.61557e-08
4.96988	-3.56232e-07	4.97488	-2.53622e-08
4.97988	-3.38379e-07	4.98488	-2.56369e-08
4.98988	-3.56445e-07	4.99488	-2.51181e-08
4.99988	-3.37555e-07	5.00488	-2.67661e-08
5.00988	-3.55774e-07	5.01488	-2.54538e-08
5.01988	-3.37799e-07	5.02488	-2.59116e-08
5.02988	-3.55804e-07	5.03488	-2.64304e-08
5.03988	-3.39416e-07	5.04488	-2.60336e-08
5.04988	-3.56964e-07	5.05488	-2.582e-08
5.05988	-3.39508e-07	5.06488	-2.63998e-08
5.06988	-3.57422e-07	5.07488	-2.55148e-08
5.07988	-3.36761e-07	5.08488	-2.61862e-08
5.08988	-3.56201e-07	5.09488	-2.56064e-08
5.09988	-3.3783e-07	5.10488	-2.61557e-08
5.10988	-3.58337e-07	5.11488	-2.54843e-08
5.11988	-3.37097e-07	5.12488	-2.64609e-08
5.12988	-3.5675e-07	5.13488	-2.4874e-08
5.13988	-3.39966e-07	5.14488	-2.60947e-08
5.14988	-3.56323e-07	5.15488	-2.4996e-08
5.15988	-3.36883e-07	5.16488	-2.65524e-08
5.16988	-3.57849e-07	5.17488	-2.53928e-08
5.17988	-3.38196e-07	5.18488	-2.51791e-08
5.18988	-3.57269e-07	5.19488	-2.48435e-08
5.19988	-3.38989e-07	5.20488	-2.55148e-08
5.20988	-3.58246e-07	5.21488	-2.53622e-08
5.21988	-3.38592e-07	5.22488	-2.60947e-08
5.22988	-3.56049e-07	5.23488	-2.48129e-08
5.23988	-3.38928e-07	5.24488	-2.60642e-08
5.24988	-3.55682e-07	5.25488	-2.4996e-08
5.25988	-3.35815e-07	5.26488	-2.63388e-08
5.26988	-3.54645e-07	5.27488	-2.57895e-08
5.27988	-3.36121e-07	5.28488	-2.59116e-08
5.28988	-3.55377e-07	5.29488	-2.57895e-08
5.29988	-3.24341e-07	5.30488	-2.56979e-08
5.30988	-3.50037e-07	5.31488	-2.54843e-08
5.31988	-3.36182e-07	5.32488	-2.57895e-08
5.32988	-3.54553e-07	5.33488	-2.50266e-08
5.33988	-3.36059e-07	5.34488	-2.64609e-08
5.34988	-3.5495e-07	5.35488	-2.53622e-08
5.35988	-3.3728e-07	5.36488	-2.61557e-08
5.36988	-3.5498e-07	5.37488	-2.52707e-08
5.37988	-3.35113e-07	5.38488	-2.61557e-08
5.38988	-3.54523e-07	5.39488	-2.50571e-08
5.39988	-3.33282e-07	5.40488	-2.62778e-08
5.40988	-3.52844e-07	5.41488	-2.53928e-08
5.41988	-3.28186e-07	5.42488	-2.71018e-08
5.42988	-3.45703e-07	5.43488	-2.60336e-08
5.43988	-3.35205e-07	5.44488	-2.61862e-08
5.44988	-3.46558e-07	5.45488	-2.4874e-08
5.45988	-3.3432e-07	5.46488	-2.70407e-08
5.46988	-3.53516e-07	5.47488	-2.56369e-08
5.47988	-3.34991e-07	5.48488	-2.59726e-08
5.48988	-3.5144e-07	5.49488	-2.54843e-08
5.49988	-3.32367e-07	5.50488	-2.59421e-08
5.50988	-3.53455e-07	5.51488	-2.53012e-08
5.51988	-3.34351e-07	5.52488	-2.61557e-08
5.52988	-3.53607e-07	5.53488	-2.51791e-08
5.53988	-3.33343e-07	5.54488	-2.67661e-08
5.54988	-3.52386e-07	5.55488	-2.56369e-08
5.55988	-3.34228e-07	5.56488	-2.63998e-08
5.56988	-3.51623e-07	5.57488	-2.58505e-08
5.57988	-3.33618e-07	5.58488	-2.67355e-08
5.58988	-3.52692e-07	5.59488	-2.63083e-08
5.59988	-3.32489e-07	5.60488	-2.66135e-08
5.60988	-3.52631e-07	5.61488	-2.60642e-08
5.61988	-3.33038e-07	5.62488	-2.68881e-08
5.62988	-3.52844e-07	5.63488	-2.56369e-08
5.63988	-3.33862e-07	5.64488	-2.72238e-08
5.64988	-3.52692e-07	5.65488	-2.57895e-08
5.65988	-3.33435e-07	5.66488	-2.63388e-08
5.66988	-3.51746e-07	5.67488	-2.58505e-08
5.67988	-3.33374e-07	5.68488	-2.69492e-08
5.68988	-3.53332e-07	5.69488	-2.52707e-08
5.69988	-3.31879e-07	5.70488	-2.70102e-08
5.70988	-3.53119e-07	5.71488	-2.52707e-08
5.71988	-3.33374e-07	5.72488	-2.72849e-08
5.72988	-3.52814e-07	5.73488	-2.54233e-08
5.73988	-3.33862e-07	5.74488	-2.71018e-08
5.74988	-3.51959e-07	5.75488	-2.59116e-08
5.75988	-3.32855e-07	5.76488	-2.71018e-08
5.76988	-3.52142e-07	5.77488	-2.582e-08
5.77988	-3.33893e-07	5.78488	-2.71323e-08
5.78988	-3.53851e-07	5.79488	-2.5759e-08
5.88991	1.11212e-06	5.89494	9.15201e-08
5.98991	7.48352e-07	5.99494	7.38504e-08
6.08991	5.78064e-07	6.09494	6.45731e-08
6.18991	4.81323e-07	6.19494	6.0087e-08
6.28991	4.16626e-07	6.29494	5.6608e-08
6.38991	3.7146e-07	6.39494	5.37698e-08
6.48991	3.38501e-07	6.49494	5.12979e-08
6.58991	3.12256e-07	6.59494	4.96194e-08
6.68991	2.92114e-07	6.69494	4.81241e-08
6.78991	2.74414e-07	6.79494	4.66287e-08
6.88991	2.5885e-07	6.89494	4.52249e-08
6.98991	2.45422e-07	6.99494	4.44315e-08
7.08991	2.34436e-07	7.09494	4.36075e-08
7.18991	2.24976e-07	7.19494	4.33328e-08
7.28991	2.16431e-07	7.29494	4.25394e-08
7.38991	2.10632e-07	7.39494	4.15323e-08
7.48991	2.05139e-07	7.49494	4.01895e-08
7.58991	1.99646e-07	7.59494	4.06168e-08
7.68991	1.95068e-07	7.69494	4.05862e-08
7.78991	1.90796e-07	7.79494	4.02505e-08
7.88991	1.86524e-07	7.89494	3.94266e-08
7.98991	1.82861e-07	7.99494	3.8389e-08
8.08991	1.79199e-07	8.09494	3.78702e-08
8.18991	1.75232e-07	8.19494	3.81753e-08
8.28991	1.72485e-07	8.29494	3.58865e-08
8.38991	1.69434e-07	8.39494	3.18277e-08
8.48991	1.67908e-07	8.49494	3.16751e-08
8.58991	1.63941e-07	8.59494	3.4025e-08
8.68991	1.59668e-07	8.69494	3.47269e-08
8.78991	1.55701e-07	8.79494	3.52151e-08
8.88991	1.49597e-07	8.89494	3.54288e-08
8.98991	1.42883e-07	8.99494	3.49405e-08
9.08991	1.37085e-07	9.09494	3.39334e-08
9.18991	1.32202e-07	9.19494	3.43301e-08
9.28991	1.29456e-07	9.29494	3.43301e-08
9.38991	1.30371e-07	9.39494	3.44522e-08
9.48991	1.30676e-07	9.49494	3.37808e-08
9.58991	1.30066e-07	9.59494	3.36282e-08
9.68991	1.29456e-07	9.69494	3.44522e-08
9.78991	1.2854e-07	9.79494	3.37503e-08
9.88991	1.25183e-07	9.89494	3.35062e-08
9.98991	1.21826e-07	9.99494	3.22549e-08
10.0899	1.18774e-07	10.0949	3.22244e-08
10.1899	1.16028e-07	10.1949	3.1492e-08
10.2899	1.12976e-07	10.2949	3.06985e-08
10.3899	1.09619e-07	10.3949	2.93558e-08
10.4899	1.07483e-07	10.4949	2.89285e-08
10.5899	1.07483e-07	10.5949	2.82877e-08
10.6899	1.07788e-07	10.6949	2.70364e-08
10.7899	1.08399e-07	10.7949	2.57242e-08
10.8899	1.06567e-07	10.8949	2.55106e-08
10.9899	1.03821e-07	10.9949	2.58462e-08
11.0899	1.01685e-07	11.0949	2.61514e-08
11.1899	1.01685e-07	11.1949	2.7189e-08
11.2899	1.01685e-07	11.2949	2.83792e-08
11.3899	1.01685e-07	11.3949	3.00272e-08
11.4899	1.01685e-07	11.4949	3.0668e-08
11.5899	1.02295e-07	11.5949	3.05765e-08
11.6899	1.026e-07	11.6949	3.02408e-08
11.7899	1.04736e-07	11.7949	2.99051e-08
11.8899	1.05652e-07	11.8949	2.99051e-08
11.9899	1.06567e-07	11.9949	2.9783e-08
12.0899	1.08093e-07	12.0949	2.90201e-08
12.1899	1.08399e-07	12.1949	2.79825e-08
12.2899	1.06567e-07	12.2949	2.69449e-08
12.3899	1.05652e-07	12.3949	2.67923e-08
12.4899	1.05957e-07	12.4949	2.64871e-08
12.5899	1.04736e-07	12.5949	2.53274e-08
12.6899	1.03211e-07	12.6949	2.44424e-08
12.7899	1.00769e-07	12.7949	2.30081e-08
12.8899	9.61915e-08	12.8949	2.23367e-08
12.9899	9.28345e-08	12.9949	2.2764e-08
13.0899	8.85621e-08	13.0949	2.34048e-08
13.1899	8.6731e-08	13.1949	2.30386e-08
13.2899	8.6731e-08	13.2949	2.23978e-08
13.3899	8.55103e-08	13.3949	2.34048e-08
13.4899	8.64259e-08	13.4949	2.43204e-08
13.5899	8.91724e-08	13.5949	2.51138e-08
13.6899	9.06983e-08	13.6949	2.54495e-08
13.7899	9.10035e-08	13.7949	2.47781e-08
13.8899	9.22242e-08	13.8949	2.56326e-08
13.9899	9.37501e-08	13.9949	2.56326e-08
14.0899	9.49708e-08	14.0949	2.50528e-08
14.1899	9.74122e-08	14.1949	2.38016e-08
14.2899	9.7107e-08	14.2949	2.32828e-08
14.3899	9.61915e-08	14.3949	2.27335e-08
14.4899	9.5276e-08	14.4949	2.16348e-08
14.5899	9.5276e-08	14.5949	2.21536e-08
14.6899	9.49708e-08	14.6949	2.27335e-08
14.7899	9.68018e-08	14.7949	2.24893e-08
14.8899	9.80225e-08	14.8949	2.14212e-08
14.9899	9.92432e-08	14.9949	2.13602e-08
15.0899	9.98536e-08	15.0949	2.21841e-08
15.1899	9.98536e-08	15.1949	2.22452e-08
15.2899	9.86329e-08	15.2949	2.24588e-08
15.3899	9.92432e-08	15.3949	2.27945e-08
15.4899	9.74122e-08	15.4949	2.27945e-08
15.5899	9.7107e-08	15.5949	2.27945e-08
15.6899	9.55811e-08	15.6949	2.20621e-08
15.7899	9.5276e-08	15.7949	2.17874e-08
15.8899	9.55811e-08	15.8949	2.194e-08
15.9899	9.43604e-08	15.9949	2.13296e-08
16.0899	9.31397e-08	16.0949	2.04752e-08
16.1899	9.22242e-08	16.1949	1.97732e-08
16.2899	9.10035e-08	16.2949	1.99564e-08
16.3899	8.97828e-08	16.3949	2.11465e-08
16.4899	8.76466e-08	16.4949	2.11465e-08
16.5899	8.64259e-08	16.5949	2.02615e-08
16.6899	8.6731e-08	16.6949	2.00784e-08
16.7899	8.58155e-08	16.7949	1.97732e-08
16.8899	8.58155e-08	16.8949	2.0292e-08
16.9899	8.36793e-08	16.9949	2.05972e-08
17.0899	8.09327e-08	17.0949	2.04752e-08
17.1899	7.9712e-08	17.1949	2.07803e-08
17.2899	7.84913e-08	17.2949	2.06583e-08
17.3899	7.72706e-08	17.3949	2.09329e-08
17.4899	7.69654e-08	17.4949	2.09024e-08
17.5899	7.69654e-08	17.5949	2.1055e-08
17.6899	7.72706e-08	17.6949	2.01395e-08
17.7899	7.72706e-08	17.7949	1.96817e-08
17.8899	7.81861e-08	17.8949	1.85831e-08
17.9899	7.9712e-08	17.9949	1.87357e-08
18.0899	7.91016e-08	18.0949	1.83389e-08
18.1899	7.81861e-08	18.1949	1.83694e-08
18.2899	7.66602e-08	18.2949	1.86441e-08
18.3899	7.78809e-08	18.3949	1.98038e-08
18.4899	8.00172e-08	18.4949	2.05057e-08
18.5899	8.06275e-08	18.5949	2.15433e-08
18.6899	7.9712e-08	18.6949	2.30997e-08
18.7899	8.00172e-08	18.7949	2.41067e-08
18.8899	8.12379e-08	18.8949	2.3649e-08
18.9899	8.21534e-08	18.9949	2.36795e-08
19.0899	8.27637e-08	19.0949	2.31912e-08
19.1899	8.27637e-08	19.1949	2.19705e-08
19.2899	8.21534e-08	19.2949	2.06583e-08
19.3899	8.33741e-08	19.3949	1.90713e-08
19.4899	8.36793e-08	19.4949	1.73013e-08
19.5899	8.52052e-08	19.5949	1.76065e-08
19.6899	8.58155e-08	19.6949	1.77591e-08
19.7899	8.55103e-08	19.7949	1.82474e-08
19.8899	8.61207e-08	19.8949	1.88577e-08
19.9899	8.30689e-08	19.9949	1.92239e-08
20.0899	8.00172e-08	20.0949	1.94986e-08
20.1899	7.84913e-08	20.1949	1.95901e-08
20.2899	7.72706e-08	20.2949	1.97122e-08
20.3899	7.63551e-08	20.3949	1.95291e-08
20.4899	7.72706e-08	20.4949	1.96512e-08
20.5899	7.75758e-08	20.5949	1.93155e-08
20.6899	7.57447e-08	20.6949	1.98953e-08
20.7899	7.54395e-08	20.7949	1.98648e-08
20.8899	7.57447e-08	20.8949	1.99564e-08
20.9899	7.72706e-08	20.9949	2.06583e-08
21.0899	7.75758e-08	21.0949	2.08108e-08
21.1899	7.78809e-08	21.1949	2.11771e-08
21.2899	7.60499e-08	21.2949	2.17874e-08
21.3899	7.60499e-08	21.3949	2.26114e-08
21.4899	7.60499e-08	21.4949	2.31607e-08
21.5899	7.48292e-08	21.5949	2.34354e-08
21.6899	7.57447e-08	21.6949	2.36185e-08
21.7899	7.54395e-08	21.7949	2.35269e-08
21.8899	7.57447e-08	21.8949	2.36185e-08
21.9899	7.54395e-08	21.9949	2.34354e-08
22.0899	7.60499e-08	22.0949	2.33743e-08
22.1899	7.54395e-08	22.1949	2.2886e-08
22.2899	7.54395e-08	22.2949	2.27029e-08
22.3899	7.36085e-08	22.3949	2.24283e-08
22.4899	7.23878e-08	22.4949	2.29776e-08
22.5899	7.17774e-08	22.5949	2.34964e-08
22.6899	7.08619e-08	22.6949	2.34354e-08
22.7899	7.17774e-08	22.7949	2.25809e-08
22.8899	7.20826e-08	22.8949	2.24283e-08
22.9899	7.29981e-08	22.9949	2.31607e-08
23.0899	7.36085e-08	23.0949	2.27945e-08
23.1899	7.29981e-08	23.1949	2.24588e-08
23.2899	7.17774e-08	23.2949	2.27335e-08
23.3899	7.20826e-08	23.3949	2.27945e-08
23.4899	7.17774e-08	23.4949	2.29166e-08
23.5899	7.26929e-08	23.5949	2.2886e-08
23.6899	7.29981e-08	23.6949	2.25198e-08
23.7899	7.08619e-08	23.7949	2.21841e-08
23.8899	7.11671e-08	23.8949	2.12991e-08
23.9899	7.14722e-08	23.9949	2.08108e-08
24.0899	7.39136e-08	24.0949	2.01395e-08
24.1899	7.36085e-08	24.1949	2.07803e-08
24.2899	7.57447e-08	24.2949	2.12686e-08
24.3899	7.57447e-08	24.3949	2.11465e-08
24.4899	7.48292e-08	24.4949	2.08108e-08
24.5899	7.33033e-08	24.5949	2.12381e-08
24.6899	7.33033e-08	24.6949	2.18484e-08
24.7899	7.26929e-08	24.7949	2.15738e-08
24.8899	7.20826e-08	24.8949	2.23978e-08
24.9899	7.33033e-08	24.9949	2.16653e-08
25.0899	7.42188e-08	25.0949	2.16348e-08
25.1899	7.51343e-08	25.1949	2.20926e-08
25.2899	7.51343e-08	25.2949	2.12381e-08
25.3899	7.48292e-08	25.3949	2.16653e-08
25.4899	7.39136e-08	25.4949	2.21536e-08
25.5899	7.36085e-08	25.5949	2.24893e-08
25.6899	7.17774e-08	25.6949	2.21841e-08
25.7899	7.08619e-08	25.7949	2.21231e-08
25.8899	6.96412e-08	25.8949	2.18179e-08
25.9899	6.81153e-08	25.9949	2.12076e-08
26.0899	6.7505e-08	26.0949	2.1879e-08
26.1899	6.71998e-08	26.1949	2.19095e-08
26.2899	7.11671e-08	26.2949	2.20315e-08
26.3899	6.44532e-08	26.3949	2.17264e-08
26.4899	6.26221e-08	26.4949	2.194e-08
26.5899	6.04859e-08	26.5949	2.14822e-08
26.6899	5.95704e-08	26.6949	2.1879e-08
26.7899	5.95704e-08	26.7949	2.13296e-08
26.8899	5.92652e-08	26.8949	2.10245e-08
26.9899	5.896e-08	26.9949	2.05057e-08
27.0899	5.92652e-08	27.0949	2.09634e-08
27.1899	6.04859e-08	27.1949	2.11465e-08
27.2899	6.26221e-08	27.2949	2.09634e-08
27.3899	6.26221e-08	27.3949	2.07803e-08
27.4899	6.35377e-08	27.4949	2.15738e-08
27.5899	6.62843e-08	27.5949	2.14212e-08
27.6899	6.56739e-08	27.6949	2.16043e-08
27.7899	6.50635e-08	27.7949	2.14517e-08
27.8899	6.47584e-08	27.8949	2.15738e-08
27.9899	6.47584e-08	27.9949	2.17874e-08
28.0899	6.50635e-08	28.0949	2.17874e-08
28.1899	6.62843e-08	28.1949	2.20315e-08
28.2899	6.65894e-08	28.2949	2.1879e-08
28.3899	6.68946e-08	28.3949	2.13907e-08
28.4899	6.59791e-08	28.4949	2.15128e-08
28.5899	6.47584e-08	28.5949	2.14212e-08
28.6899	6.10963e-08	28.6949	2.13907e-08
28.7899	5.896e-08	28.7949	2.10855e-08
28.8899	5.86549e-08	28.8949	2.05057e-08
28.9899	5.95704e-08	28.9949	2.00784e-08
29.0899	6.14014e-08	29.0949	1.94681e-08
29.1899	6.20118e-08	29.1949	1.96207e-08
29.2899	6.38428e-08	29.2949	1.99869e-08
29.3899	6.50635e-08	29.3949	2.00479e-08
29.4899	6.62843e-08	29.4949	2.0292e-08
29.5899	6.7505e-08	29.5949	1.97732e-08
29.6899	6.65894e-08	29.6949	1.97427e-08
29.7899	6.68946e-08	29.7949	1.85525e-08
29.8899	6.7505e-08	29.8949	1.83084e-08
29.9899	6.84205e-08	29.9949	1.81253e-08
30.0899	6.56739e-08	30.0949	1.78506e-08
30.1899	6.38428e-08	30.1949	1.69961e-08
30.2899	6.44532e-08	30.2949	1.78201e-08
30.3899	6.47584e-08	30.3949	1.8522e-08
30.4899	6.44532e-08	30.4949	1.86136e-08
30.5899	6.62843e-08	30.5949	1.83694e-08
30.6899	6.62843e-08	30.6949	1.90713e-08
30.7899	6.68946e-08	30.7949	1.82169e-08
30.8899	6.68946e-08	30.8949	1.8461e-08
30.9899	6.59791e-08	30.9949	1.89798e-08
31.0899	6.56739e-08	31.0949	1.94681e-08
31.1899	6.47584e-08	31.1949	1.9346e-08
31.2899	6.53687e-08	31.2949	1.87967e-08
31.3899	6.56739e-08	31.3949	1.80337e-08
31.4899	6.71998e-08	31.4949	1.84915e-08
31.5899	6.65894e-08	31.5949	1.81253e-08
31.6899	6.71998e-08	31.6949	1.89798e-08
31.7899	6.65894e-08	31.7949	1.95901e-08
31.8899	6.68946e-08	31.8949	1.95901e-08
31.9899	6.68946e-08	31.9949	1.98953e-08
32.0899	6.71998e-08	32.0949	1.96817e-08
32.1899	6.50635e-08	32.1949	1.96817e-08
32.2899	6.29273e-08	32.2949	2.0292e-08
32.3899	6.26221e-08	32.3949	2.00784e-08
32.4899	6.4148e-08	32.4949	1.98648e-08
32.5899	6.32325e-08	32.5949	2.03531e-08
32.6899	6.35377e-08	32.6949	2.07193e-08
32.7899	6.29273e-08	32.7949	2.04446e-08
32.8899	6.20118e-08	32.8949	2.00479e-08
32.9899	6.07911e-08	32.9949	1.98953e-08
33.0899	6.14014e-08	33.0949	1.93765e-08
33.1899	6.17066e-08	33.1949	2.00784e-08
33.2899	6.17066e-08	33.2949	1.98648e-08
33.3899	6.17066e-08	33.3949	2.05057e-08
33.4899	6.32325e-08	33.4949	1.99564e-08
33.5899	6.17066e-08	33.5949	2.00174e-08
33.6899	6.14014e-08	33.6949	1.9285e-08
33.7899	6.04859e-08	33.7949	1.94681e-08
33.8899	6.10963e-08	33.8949	2.00784e-08
33.9899	6.14014e-08	33.9949	1.98648e-08
34.0899	6.26221e-08	34.0949	1.91629e-08
34.1899	6.2317e-08	34.1949	1.90408e-08
34.2899	6.29273e-08	34.2949	1.92239e-08
34.3899	6.38428e-08	34.3949	1.93155e-08
34.4899	6.35377e-08	34.4949	1.96207e-08
34.5899	6.35377e-08	34.5949	1.89493e-08
34.6899	6.29273e-08	34.6949	1.90408e-08
34.7899	6.10963e-08	34.7949	1.83694e-08
34.8899	5.98756e-08	34.8949	1.85831e-08
34.9899	6.07911e-08	34.9949	1.82474e-08
35.0899	6.26221e-08	35.0949	1.66299e-08
35.1899	6.2317e-08	35.1949	1.55008e-08
35.2899	5.896e-08	35.2949	1.57144e-08
35.3899	5.7129e-08	35.3949	1.65384e-08
35.4899	5.59083e-08	35.4949	1.77896e-08
35.5899	5.28565e-08	35.5949	1.81863e-08
35.6899	5.1941e-08	35.6949	1.82779e-08
35.7899	5.1941e-08	35.7949	1.83084e-08
35.8899	5.13306e-08	35.8949	1.76065e-08
35.9899	5.25513e-08	35.9949	1.82474e-08
36.0899	5.1941e-08	36.0949	1.84e-08
36.1899	5.16358e-08	36.1949	1.83084e-08
36.2899	5.22462e-08	36.2949	1.80032e-08
36.3899	5.1941e-08	36.3949	1.83084e-08
36.4899	5.13306e-08	36.4949	1.7637e-08
36.5899	5.13306e-08	36.5949	1.70267e-08
36.6899	4.98048e-08	36.6949	1.66299e-08
36.7899	4.91944e-08	36.7949	1.54703e-08
36.8899	4.88892e-08	36.8949	1.54703e-08
36.9899	4.76685e-08	36.9949	1.57754e-08
37.0899	4.88892e-08	37.0949	1.70877e-08
37.1899	4.76685e-08	37.1949	1.74539e-08
37.2899	4.73634e-08	37.2949	1.73929e-08
37.3899	4.88892e-08	37.3949	1.73929e-08
37.4899	5.01099e-08	37.4949	1.74844e-08
37.5899	4.91944e-08	37.5949	1.73013e-08
37.6899	4.98048e-08	37.6949	1.71487e-08
37.7899	5.01099e-08	37.7949	1.65384e-08
37.8899	4.91944e-08	37.8949	1.63858e-08
37.9899	4.91944e-08	37.9949	1.66299e-08
38.0899	4.85841e-08	38.0949	1.70572e-08
38.1899	4.94996e-08	38.1949	1.76675e-08
38.2899	5.04151e-08	38.2949	1.72098e-08
38.3899	5.07203e-08	38.3949	1.73624e-08
38.4899	4.94996e-08	38.4949	1.74234e-08
38.5899	4.82789e-08	38.5949	1.79727e-08
38.6899	4.73634e-08	38.6949	1.71793e-08
38.7899	4.73634e-08	38.7949	1.72098e-08
38.8899	4.64478e-08	38.8949	1.80643e-08
38.9899	4.70582e-08	38.9949	1.77286e-08
39.0899	4.49219e-08	39.0949	1.79422e-08
39.1899	4.40064e-08	39.1949	1.77286e-08
39.2899	4.49219e-08	39.2949	1.76981e-08
39.3899	4.43116e-08	39.3949	1.76981e-08
39.4899	4.49219e-08	39.4949	1.79422e-08
39.5899	4.33961e-08	39.5949	1.79727e-08
39.6899	4.12598e-08	39.6949	1.78506e-08
39.7899	4.21754e-08	39.7949	1.75149e-08
39.8899	4.27857e-08	39.8949	1.77286e-08
39.9899	4.46168e-08	39.9949	1.70267e-08
40.0899	4.58375e-08	40.0949	1.69351e-08
40.1899	4.73634e-08	40.1949	1.70877e-08
40.2899	4.88892e-08	40.2949	1.67825e-08
40.3899	5.10255e-08	40.3949	1.68436e-08
40.4899	5.1941e-08	40.4949	1.68741e-08
40.5899	5.10255e-08	40.5949	1.73013e-08
40.6899	4.94996e-08	40.6949	1.69656e-08
40.7899	4.98048e-08	40.7949	1.78201e-08
40.8899	5.07203e-08	40.8949	1.76981e-08
40.9899	5.25513e-08	40.9949	1.74844e-08
41.0899	4.94996e-08	41.0949	1.79727e-08
41.1899	4.82789e-08	41.1949	1.81863e-08
41.2899	4.88892e-08	41.2949	1.80643e-08
41.3899	5.01099e-08	41.3949	1.80643e-08
41.4899	5.22462e-08	41.4949	1.76065e-08
41.5899	5.22462e-08	41.5949	1.76981e-08
41.6899	5.28565e-08	41.6949	1.74844e-08
41.7899	5.1941e-08	41.7949	1.74539e-08
41.8899	5.01099e-08	41.8949	1.74539e-08
41.9899	5.25513e-08	41.9949	1.71793e-08
42.0899	4.94996e-08	42.0949	1.73929e-08
42.1899	4.76685e-08	42.1949	1.73929e-08
42.2899	4.79737e-08	42.2949	1.71487e-08
42.3899	4.79737e-08	42.3949	1.64774e-08
42.4899	4.91944e-08	42.4949	1.60501e-08
42.5899	4.76685e-08	42.5949	1.69656e-08
42.6899	4.76685e-08	42.6949	1.55008e-08
42.7899	4.70582e-08	42.7949	1.40054e-08
42.8899	4.70582e-08	42.8949	1.41275e-08
42.9899	4.76685e-08	42.9949	1.39749e-08
43.0899	4.6753e-08	43.0949	1.51346e-08
43.1899	4.6753e-08	43.1949	1.60196e-08
43.2899	4.6753e-08	43.2949	1.62942e-08
43.3899	4.6753e-08	43.3949	1.67825e-08
43.4899	4.61427e-08	43.4949	1.72708e-08
43.5899	4.55323e-08	43.5949	1.75455e-08
43.6899	4.49219e-08	43.6949	1.69656e-08
43.7899	4.55323e-08	43.7949	1.71793e-08
43.8899	4.37012e-08	43.8949	1.80032e-08
43.9899	4.06495e-08	43.9949	1.76981e-08
44.0899	3.79029e-08	44.0949	1.73929e-08
44.1899	3.66822e-08	44.1949	1.73624e-08
44.2899	3.54615e-08	44.2949	1.76981e-08
44.3899	3.57667e-08	44.3949	1.74844e-08
44.4899	3.57667e-08	44.4949	1.76065e-08
44.5899	3.54615e-08	44.5949	1.74539e-08
44.6899	3.51563e-08	44.6949	1.73929e-08
44.7899	3.66822e-08	44.7949	1.69961e-08
44.8899	3.60718e-08	44.8949	1.6813e-08
44.9899	3.6377e-08	44.9949	1.64774e-08
45.0899	3.75977e-08	45.0949	1.62942e-08
45.1899	3.6377e-08	45.1949	1.6691e-08
45.2899	3.72926e-08	45.2949	1.74234e-08
45.3899	3.69874e-08	45.3949	1.70877e-08
45.4899	3.75977e-08	45.4949	1.72708e-08
45.5899	3.72926e-08	45.5949	1.69046e-08
45.6899	3.42408e-08	45.6949	1.70572e-08
45.7899	3.30201e-08	45.7949	1.62942e-08
45.8899	3.48511e-08	45.8949	1.65689e-08
45.9899	3.48511e-08	45.9949	1.63248e-08
46.0899	3.24097e-08	46.0949	1.71487e-08
46.1899	3.42408e-08	46.1949	1.66299e-08
46.2899	3.75977e-08	46.2949	1.65384e-08
46.3899	3.72926e-08	46.3949	1.53787e-08
46.4899	3.6377e-08	46.4949	1.47378e-08
46.5899	3.4546e-08	46.5949	1.43716e-08
46.6899	3.75977e-08	46.6949	1.44327e-08
46.7899	3.54615e-08	46.7949	1.43106e-08
46.8899	3.66822e-08	46.8949	1.47684e-08
46.9899	3.82081e-08	46.9949	1.55313e-08
47.0899	4.03443e-08	47.0949	1.61417e-08
47.1899	4.06495e-08	47.1949	1.65079e-08
47.2899	4.09547e-08	47.2949	1.66605e-08
47.3899	3.91236e-08	47.3949	1.71487e-08
47.4899	4.00391e-08	47.4949	1.64774e-08
47.5899	3.88184e-08	47.5949	1.66299e-08
47.6899	3.91236e-08	47.6949	1.6691e-08
47.7899	3.85133e-08	47.7949	1.6813e-08
47.8899	3.82081e-08	47.8949	1.66299e-08
47.9899	3.60718e-08	47.9949	1.5928e-08
48.0899	3.48511e-08	48.0949	1.50125e-08
48.1899	3.48511e-08	48.1949	1.44022e-08
48.2899	3.33253e-08	48.2949	1.45853e-08
48.3899	3.4546e-08	48.3949	1.38528e-08
48.4899	3.51563e-08	48.4949	1.3273e-08
48.5899	3.66822e-08	48.5949	1.30899e-08
48.6899	3.75977e-08	48.6949	1.33035e-08
48.7899	3.85133e-08	48.7949	1.34256e-08
48.8899	3.91236e-08	48.8949	1.35171e-08
48.9899	3.9734e-08	48.9949	1.35782e-08
49.0899	3.88184e-08	49.0949	1.43716e-08
49.1899	3.79029e-08	49.1949	1.53482e-08
49.2899	3.75977e-08	49.2949	1.53787e-08
49.3899	3.79029e-08	49.3949	1.4921e-08
49.4899	3.85133e-08	49.4949	1.53787e-08
49.5899	3.88184e-08	49.5949	1.56534e-08
49.6899	3.79029e-08	49.6949	1.5867e-08
49.7899	3.85133e-08	49.7949	1.60806e-08
49.8899	3.82081e-08	49.8949	1.62332e-08
49.9899	3.85133e-08	49.9949	1.62332e-08
50.0899	3.9734e-08	50.0949	1.61722e-08
50.1899	4.03443e-08	50.1949	1.62942e-08
50.2899	4.09547e-08	50.2949	1.69351e-08
50.3899	3.9734e-08	50.3949	1.52566e-08
50.4899	3.9734e-08	50.4949	1.4982e-08
50.5899	3.91236e-08	50.5949	1.51346e-08
50.6899	3.82081e-08	50.6949	1.51346e-08
50.7899	3.82081e-08	50.7949	1.55923e-08
50.8899	3.82081e-08	50.8949	1.55313e-08
50.9899	3.75977e-08	50.9949	1.54703e-08
51.0899	3.6377e-08	51.0949	1.56839e-08
51.1899	3.60718e-08	51.1949	1.59586e-08
51.2899	3.6377e-08	51.2949	1.47989e-08
51.3899	3.72926e-08	51.3949	1.37308e-08
51.4899	3.79029e-08	51.4949	1.28763e-08
51.5899	3.85133e-08	51.5949	1.26016e-08
51.6899	3.9734e-08	51.6949	1.29373e-08
51.7899	4.06495e-08	51.7949	1.41275e-08
51.8899	4.1565e-08	51.8949	1.50125e-08
51.9899	4.09547e-08	51.9949	1.52872e-08
52.0899	4.1565e-08	52.0949	1.40665e-08
52.1899	4.12598e-08	52.1949	1.45242e-08
52.2899	4.12598e-08	52.2949	1.54703e-08
52.3899	4.24805e-08	52.3949	1.62942e-08
52.4899	4.18702e-08	52.4949	1.57754e-08
52.5899	4.24805e-08	52.5949	1.55313e-08
52.6899	4.27857e-08	52.6949	1.47378e-08
52.7899	4.12598e-08	52.7949	1.42496e-08
52.8899	4.03443e-08	52.8949	1.43411e-08
52.9899	3.94288e-08	52.9949	1.37003e-08
53.0899	4.09547e-08	53.0949	1.31509e-08
53.1899	4.09547e-08	53.1949	1.2327e-08
53.2899	3.9734e-08	53.2949	1.18997e-08
53.3899	3.91236e-08	53.3949	1.17166e-08
53.4899	3.91236e-08	53.4949	1.2327e-08
53.5899	3.79029e-08	53.5949	1.26932e-08
53.6899	3.60718e-08	53.6949	1.2388e-08
53.7899	3.69874e-08	53.7949	1.22049e-08
53.8899	3.6377e-08	53.8949	1.19302e-08
53.9899	3.4546e-08	53.9949	1.02823e-08
54.0899	3.42408e-08	54.0949	1.0618e-08
54.1899	3.4546e-08	54.1949	1.074e-08
54.2899	3.54615e-08	54.2949	9.2752e-09
54.3899	3.57667e-08	54.3949	9.94659e-09
54.4899	3.60718e-08	54.4949	1.03738e-08
54.5899	3.66822e-08	54.5949	1.1442e-08
54.6899	3.66822e-08	54.6949	1.15945e-08
54.7899	3.72926e-08	54.7949	1.20828e-08
54.8899	3.75977e-08	54.8949	1.22049e-08
54.9899	3.69874e-08	54.9949	1.26321e-08
55.0899	3.75977e-08	55.0949	1.40054e-08
55.1899	3.79029e-08	55.1949	1.38223e-08
55.2899	3.72926e-08	55.2949	1.51041e-08
55.3899	3.85133e-08	55.3949	1.4921e-08
55.4899	3.88184e-08	55.4949	1.4921e-08
55.5899	3.9734e-08	55.5949	1.52566e-08
55.6899	3.85133e-08	55.6949	1.56839e-08
55.7899	3.85133e-08	55.7949	1.54398e-08
55.8899	3.72926e-08	55.8949	1.53482e-08
55.9899	3.60718e-08	55.9949	1.60196e-08
56.0899	3.66822e-08	56.0949	1.55313e-08
56.1899	3.66822e-08	56.1949	1.57754e-08
56.2899	3.75977e-08	56.2949	1.57144e-08
56.3899	3.72926e-08	56.3949	1.58365e-08
56.4899	3.69874e-08	56.4949	1.61417e-08
56.5899	3.69874e-08	56.5949	1.58365e-08
56.6899	3.54615e-08	56.6949	1.5867e-08
56.7899	3.48511e-08	56.7949	1.53787e-08
56.8899	3.39356e-08	56.8949	1.4982e-08
56.9899	3.39356e-08	56.9949	1.4921e-08
57.0899	3.42408e-08	57.0949	1.60501e-08
57.1899	3.4546e-08	57.1949	1.5928e-08
57.2899	3.4546e-08	57.2949	1.56839e-08
57.3899	3.4546e-08	57.3949	1.58975e-08
57.4899	3.48511e-08	57.4949	1.59586e-08
57.5899	3.27149e-08	57.5949	1.53787e-08
57.6899	3.08839e-08	57.6949	1.48599e-08
57.7899	2.90528e-08	57.7949	1.46463e-08
57.8899	2.78321e-08	57.8949	1.51956e-08
57.9899	2.81373e-08	57.9949	1.51346e-08
58.0899	2.78321e-08	58.0949	1.52566e-08
58.1899	2.81373e-08	58.1949	1.55618e-08
58.2899	2.9358e-08	58.2949	1.56534e-08
58.3899	2.9358e-08	58.3949	1.5867e-08
58.4899	2.87476e-08	58.4949	1.52872e-08
58.5899	2.96632e-08	58.5949	1.56229e-08
58.6899	3.1189e-08	58.6949	1.55923e-08
58.7899	3.02735e-08	58.7949	1.55923e-08
58.8899	3.05787e-08	58.8949	1.56839e-08
58.9899	3.17994e-08	58.9949	1.4921e-08
59.0899	3.24097e-08	59.0949	1.4158e-08
59.1899	3.36304e-08	59.1949	1.41275e-08
59.2899	3.51563e-08	59.2949	1.41885e-08
59.3899	3.60718e-08	59.3949	1.37613e-08
59.4899	3.66822e-08	59.4949	1.34561e-08
59.5899	3.72926e-08	59.5949	1.3212e-08
59.6899	3.6377e-08	59.6949	1.31815e-08
59.7899	3.57667e-08	59.7949	1.3334e-08
59.8899	3.36304e-08	59.8949	1.33035e-08
59.9899	3.39356e-08	59.9949	1.33951e-08
60.0899	3.36304e-08	60.0949	1.37003e-08
60.1899	3.36304e-08	60.1949	1.35171e-08
60.2899	3.42408e-08	60.2949	1.36697e-08
60.3899	3.42408e-08	60.3949	1.33646e-08
60.4899	3.4546e-08	60.4949	1.25101e-08
60.5899	3.48511e-08	60.5949	1.22354e-08
60.6899	3.51563e-08	60.6949	1.27237e-08
60.7899	3.60718e-08	60.7949	1.24795e-08
60.8899	3.4546e-08	60.8949	1.27542e-08
60.9899	3.27149e-08	60.9949	1.16556e-08
61.0899	3.14942e-08	61.0949	1.14114e-08
61.1899	3.17994e-08	61.1949	1.2327e-08
61.2899	3.05787e-08	61.2949	1.27237e-08
61.3899	3.17994e-08	61.3949	1.22049e-08
61.4899	3.08839e-08	61.4949	1.25101e-08
61.5899	2.99683e-08	61.5949	1.26627e-08
61.6899	3.02735e-08	61.6949	1.22049e-08
61.7899	3.08839e-08	61.7949	1.33646e-08
61.8899	3.6377e-08	61.8949	1.33951e-08
61.9899	3.08839e-08	61.9949	1.37613e-08
62.0899	3.05787e-08	62.0949	1.35782e-08
62.1899	3.02735e-08	62.1949	1.43106e-08
62.2899	3.1189e-08	62.2949	1.47073e-08
62.3899	3.08839e-08	62.3949	1.4219e-08
62.4899	3.02735e-08	62.4949	1.4158e-08
62.5899	3.21046e-08	62.5949	1.40665e-08
62.6899	3.21046e-08	62.6949	1.41885e-08
62.7899	2.99683e-08	62.7949	1.39749e-08
62.8899	3.05787e-08	62.8949	1.43716e-08
62.9899	3.02735e-08	62.9949	1.46158e-08
63.0899	2.96632e-08	63.0949	1.44632e-08
63.1899	3.21046e-08	63.1949	1.4097e-08
63.2899	3.1189e-08	63.2949	1.44327e-08
63.3899	3.14942e-08	63.3949	1.44937e-08
63.4899	3.05787e-08	63.4949	1.50735e-08
63.5899	3.1189e-08	63.5949	1.51346e-08
63.6899	3.08839e-08	63.6949	1.53482e-08
63.7899	3.14942e-08	63.7949	1.48904e-08
63.8899	3.14942e-08	63.8949	1.40359e-08
63.9899	3.05787e-08	63.9949	1.45547e-08
64.0899	3.14942e-08	64.0949	1.3334e-08
64.1899	3.21046e-08	64.1949	1.19302e-08
64.2899	3.17994e-08	64.2949	1.18692e-08
64.3899	3.24097e-08	64.3949	1.18692e-08
64.4899	3.33253e-08	64.4949	1.1503e-08
64.5899	3.36304e-08	64.5949	1.17471e-08
64.6899	3.42408e-08	64.6949	1.11673e-08
64.7899	3.39356e-08	64.7949	1.03738e-08
64.8899	3.30201e-08	64.8949	1.10757e-08
64.9899	3.48511e-08	64.9949	1.24795e-08
65.0899	3.4546e-08	65.0949	1.19607e-08
65.1899	3.4546e-08	65.1949	1.10757e-08
65.2899	3.33253e-08	65.2949	9.42779e-09
65.3899	3.36304e-08	65.3949	8.72589e-09
65.4899	3.17994e-08	65.4949	8.35967e-09
65.5899	3.14942e-08	65.5949	8.90899e-09
65.6899	3.21046e-08	65.6949	1.03738e-08
65.7899	3.21046e-08	65.7949	1.13199e-08
65.8899	3.30201e-08	65.8949	1.13504e-08
65.9899	3.39356e-08	65.9949	1.13199e-08
66.0899	3.27149e-08	66.0949	1.13504e-08
66.1899	3.14942e-08	66.1949	1.25406e-08
66.2899	2.99683e-08	66.2949	1.35477e-08
66.3899	2.87476e-08	66.3949	1.42801e-08
66.4899	2.87476e-08	66.4949	1.43411e-08
66.5899	2.72218e-08	66.5949	1.42496e-08
66.6899	2.56959e-08	66.6949	1.39139e-08
66.7899	2.50855e-08	66.7949	1.4097e-08
66.8899	2.44752e-08	66.8949	1.43106e-08
66.9899	2.32545e-08	66.9949	1.40054e-08
67.0899	2.50855e-08	67.0949	1.44937e-08
67.1899	2.32545e-08	67.1949	1.43716e-08
67.2899	2.32545e-08	67.2949	1.40359e-08
67.3899	2.417e-08	67.3949	1.3334e-08
67.4899	2.32545e-08	67.4949	1.31815e-08
67.5899	2.29493e-08	67.5949	1.26932e-08
67.6899	2.23389e-08	67.6949	1.36697e-08
67.7899	2.20338e-08	67.7949	1.46463e-08
67.8899	2.14234e-08	67.8949	1.45547e-08
67.9899	2.20338e-08	67.9949	1.46463e-08
68.0899	2.29493e-08	68.0949	1.40359e-08
68.1899	2.38648e-08	68.1949	1.40665e-08
68.2899	2.35596e-08	68.2949	1.38223e-08
68.3899	2.17286e-08	68.3949	1.4097e-08
68.4899	1.98975e-08	68.4949	1.34256e-08
68.5899	2.02027e-08	68.5949	1.37003e-08
68.6899	2.11182e-08	68.6949	1.34561e-08
68.7899	2.23389e-08	68.7949	1.35477e-08
68.8899	2.29493e-08	68.8949	1.37613e-08
68.9899	2.32545e-08	68.9949	1.34256e-08
69.0899	2.50855e-08	69.0949	1.3273e-08
69.1899	2.56959e-08	69.1949	1.29678e-08
69.2899	2.72218e-08	69.2949	1.3212e-08
69.3899	2.84425e-08	69.3949	1.28152e-08
69.4899	2.90528e-08	69.4949	1.34561e-08
69.5899	2.96632e-08	69.5949	1.35782e-08
69.6899	2.99683e-08	69.6949	1.38834e-08
69.7899	3.02735e-08	69.7949	1.43106e-08
69.8899	3.05787e-08	69.8949	1.44327e-08
69.9899	2.87476e-08	69.9949	1.46158e-08
70.0899	2.63062e-08	70.0949	1.4097e-08
70.1899	2.75269e-08	70.1949	1.35171e-08
70.2899	2.87476e-08	70.2949	1.42801e-08
70.3899	2.90528e-08	70.3949	1.42496e-08
70.4899	2.96632e-08	70.4949	1.44937e-08
70.5899	3.05787e-08	70.5949	1.4158e-08
70.6899	2.81373e-08	70.6949	1.39444e-08
70.7899	2.72218e-08	70.7949	1.43106e-08
70.8899	2.6001e-08	70.8949	1.43716e-08
70.9899	2.35596e-08	70.9949	1.42496e-08
71.0899	2.38648e-08	71.0949	1.44327e-08
71.1899	2.417e-08	71.1949	1.47073e-08
71.2899	2.56959e-08	71.2949	1.43411e-08
71.3899	2.63062e-08	71.3949	1.42496e-08
71.4899	2.90528e-08	71.4949	1.36392e-08
71.5899	2.96632e-08	71.5949	1.41885e-08
71.6899	2.96632e-08	71.6949	1.38834e-08
71.7899	2.87476e-08	71.7949	1.38834e-08
71.8899	2.90528e-08	71.8949	1.31815e-08
71.9899	2.69166e-08	71.9949	1.35171e-08
72.0899	2.53907e-08	72.0949	1.28152e-08
72.1899	2.47803e-08	72.1949	1.30899e-08
72.2899	2.26441e-08	72.2949	1.38834e-08
72.3899	2.23389e-08	72.3949	1.36697e-08
72.4899	2.14234e-08	72.4949	1.3212e-08
72.5899	2.17286e-08	72.5949	1.40054e-08
72.6899	2.05079e-08	72.6949	1.43411e-08
72.7899	1.74561e-08	72.7949	1.41885e-08
72.8899	1.77613e-08	72.8949	1.37613e-08
72.9899	1.7151e-08	72.9949	1.27847e-08
73.0899	1.68458e-08	73.0949	1.27847e-08
73.1899	1.59302e-08	73.1949	1.29678e-08
73.2899	1.65406e-08	73.2949	1.2449e-08
73.3899	1.65406e-08	73.3949	1.27542e-08
73.4899	1.50147e-08	73.4949	1.29068e-08
73.5899	1.50147e-08	73.5949	1.23575e-08
73.6899	1.40992e-08	73.6949	1.16861e-08
73.7899	1.34888e-08	73.7949	1.1503e-08
73.8899	1.44044e-08	73.8949	1.19302e-08
73.9899	1.34888e-08	73.9949	1.19302e-08
74.0899	1.28785e-08	74.0949	1.26016e-08
74.1899	1.40992e-08	74.1949	1.25711e-08
74.2899	1.40992e-08	74.2949	1.26932e-08
74.3899	1.44044e-08	74.3949	1.2449e-08
74.4899	1.50147e-08	74.4949	1.28152e-08
74.5899	1.34888e-08	74.5949	1.28152e-08
74.6899	1.40992e-08	74.6949	1.26932e-08
74.7899	1.44044e-08	74.7949	1.29373e-08
74.8899	1.3794e-08	74.8949	1.31204e-08
74.9899	1.40992e-08	74.9949	1.24185e-08
75.0899	1.25733e-08	75.0949	1.2327e-08
75.1899	1.31837e-08	75.1949	1.22354e-08
75.2899	1.31837e-08	75.2949	1.26932e-08
75.3899	1.28785e-08	75.3949	1.21133e-08
75.4899	1.3794e-08	75.4949	1.26016e-08
75.5899	1.34888e-08	75.5949	1.26016e-08
75.6899	1.40992e-08	75.6949	1.19302e-08
75.7899	1.22681e-08	75.7949	1.20523e-08
75.8899	1.22681e-08	75.8949	1.1564e-08
75.9899	1.16578e-08	75.9949	1.08316e-08
76.0899	1.31837e-08	76.0949	1.11063e-08
76.1899	1.40992e-08	76.1949	1.20218e-08
76.2899	1.53199e-08	76.2949	1.28152e-08
76.3899	1.59302e-08	76.3949	1.30899e-08
76.4899	1.44044e-08	76.4949	1.34866e-08
76.5899	1.50147e-08	76.5949	1.38223e-08
76.6899	1.47095e-08	76.6949	1.33035e-08
76.7899	1.40992e-08	76.7949	1.26321e-08
76.8899	1.28785e-08	76.8949	1.20523e-08
76.9899	1.40992e-08	76.9949	1.18387e-08
77.0899	1.31837e-08	77.0949	1.2449e-08
77.1899	1.13526e-08	77.1949	1.22964e-08
77.2899	1.13526e-08	77.2949	1.31815e-08
77.3899	1.04371e-08	77.3949	1.33035e-08
77.4899	1.01319e-08	77.4949	1.42801e-08
77.5899	1.01319e-08	77.5949	1.38834e-08
77.6899	1.13526e-08	77.6949	1.4219e-08
77.7899	1.04371e-08	77.7949	1.45853e-08
77.8899	1.01319e-08	77.8949	1.45242e-08
77.9899	1.01319e-08	77.9949	1.41885e-08
78.0899	9.82673e-09	78.0949	1.40054e-08
78.1899	1.07423e-08	78.1949	1.39139e-08
78.2899	1.1963e-08	78.2949	1.35477e-08
78.3899	1.31837e-08	78.3949	1.33951e-08
78.4899	1.50147e-08	78.4949	1.40665e-08
78.5899	1.50147e-08	78.5949	1.48599e-08
78.6899	1.65406e-08	78.6949	1.4219e-08
78.7899	1.7151e-08	78.7949	1.4097e-08
78.8899	1.74561e-08	78.8949	1.36087e-08
78.9899	1.86768e-08	78.9949	1.37613e-08
79.0899	1.92872e-08	79.0949	1.28152e-08
79.1899	2.05079e-08	79.1949	1.26932e-08
79.2899	2.20338e-08	79.2949	1.28152e-08
79.3899	2.20338e-08	79.3949	1.26016e-08
79.4899	2.26441e-08	79.4949	1.27542e-08
79.5899	2.32545e-08	79.5949	1.23575e-08
79.6899	2.417e-08	79.6949	1.2449e-08
79.7899	2.47803e-08	79.7949	1.33646e-08
79.8899	2.6001e-08	79.8949	1.35477e-08
79.9899	2.69166e-08	79.9949	1.35477e-08
80.0899	2.6001e-08	80.0949	1.27237e-08
80.1899	2.26441e-08	80.1949	1.30289e-08
80.2899	2.08131e-08	80.2949	1.29373e-08
80.3899	1.95924e-08	80.3949	1.25711e-08
80.4899	1.86768e-08	80.4949	1.30289e-08
80.5899	1.86768e-08	80.5949	1.28763e-08
80.6899	1.77613e-08	80.6949	1.28458e-08
80.7899	1.62354e-08	80.7949	1.31204e-08
80.8899	1.56251e-08	80.8949	1.31204e-08
80.9899	1.3794e-08	80.9949	1.2327e-08
81.0899	1.3794e-08	81.0949	1.20523e-08
81.1899	1.31837e-08	81.1949	1.2388e-08
81.2899	1.40992e-08	81.2949	1.26016e-08
81.3899	1.50147e-08	81.3949	1.2449e-08
81.4899	1.53199e-08	81.4949	1.2388e-08
81.5899	1.53199e-08	81.5949	1.25711e-08
81.6899	1.56251e-08	81.6949	1.29373e-08
81.7899	1.65406e-08	81.7949	1.2327e-08
81.8899	1.59302e-08	81.8949	1.20828e-08
81.9899	1.74561e-08	81.9949	1.23575e-08
82.0899	1.74561e-08	82.0949	1.24185e-08
82.1899	1.80665e-08	82.1949	1.20828e-08
82.2899	1.86768e-08	82.2949	1.26932e-08
82.3899	1.74561e-08	82.3949	1.30594e-08
82.4899	1.80665e-08	82.4949	1.3212e-08
82.5899	1.74561e-08	82.5949	1.36392e-08
82.6899	1.74561e-08	82.6949	1.31815e-08
82.7899	1.77613e-08	82.7949	1.26321e-08
82.8899	1.95924e-08	82.8949	1.27237e-08
82.9899	1.98975e-08	82.9949	1.2449e-08
83.0899	2.08131e-08	83.0949	1.26627e-08
83.1899	2.11182e-08	83.1949	1.21744e-08
83.2899	2.26441e-08	83.2949	1.18692e-08
83.3899	2.26441e-08	83.3949	1.20828e-08
83.4899	2.29493e-08	83.4949	1.24795e-08
83.5899	2.32545e-08	83.5949	1.20218e-08
83.6899	2.20338e-08	83.6949	1.26321e-08
83.7899	2.05079e-08	83.7949	1.25406e-08
83.8899	2.17286e-08	83.8949	1.22049e-08
83.9899	2.05079e-08	83.9949	1.16251e-08
84.0899	2.05079e-08	84.0949	1.08926e-08
84.1899	1.95924e-08	84.1949	1.1442e-08
84.2899	1.80665e-08	84.2949	1.18692e-08
84.3899	1.65406e-08	84.3949	1.16251e-08
84.4899	1.62354e-08	84.4949	1.17776e-08
84.5899	1.65406e-08	84.5949	1.20828e-08
84.6899	1.77613e-08	84.6949	1.18692e-08
84.7899	1.8982e-08	84.7949	1.17776e-08
84.8899	2.02027e-08	84.8949	1.20828e-08
84.9899	2.11182e-08	84.9949	1.21439e-08
85.0899	2.20338e-08	85.0949	1.22964e-08
85.1899	1.98975e-08	85.1949	1.2388e-08
85.2899	1.83717e-08	85.2949	1.26627e-08
85.3899	1.68458e-08	85.3949	1.28458e-08
85.4899	1.50147e-08	85.4949	1.28152e-08
85.5899	1.3794e-08	85.5949	1.24185e-08
85.6899	1.44044e-08	85.6949	1.18387e-08
85.7899	1.59302e-08	85.7949	1.1442e-08
85.8899	1.7151e-08	85.8949	1.20828e-08
85.9899	1.80665e-08	85.9949	1.18692e-08
86.0899	2.02027e-08	86.0949	1.26016e-08
86.1899	2.14234e-08	86.1949	1.18997e-08
86.2899	2.35596e-08	86.2949	1.20218e-08
86.3899	2.35596e-08	86.3949	1.21133e-08
86.4899	2.32545e-08	86.4949	1.27847e-08
86.5899	2.35596e-08	86.5949	1.2449e-08
86.6899	2.35596e-08	86.6949	1.28458e-08
86.7899	2.26441e-08	86.7949	1.26016e-08
86.8899	2.417e-08	86.8949	1.29983e-08
86.9899	2.38648e-08	86.9949	1.28763e-08
87.0899	2.50855e-08	87.0949	1.20828e-08
87.1899	2.63062e-08	87.1949	1.31815e-08
87.2899	2.53907e-08	87.2949	1.21439e-08
87.3899	2.47803e-08	87.3949	1.21744e-08
87.4899	2.53907e-08	87.4949	1.18692e-08
87.5899	2.50855e-08	87.5949	1.11673e-08
87.6899	2.50855e-08	87.6949	1.11673e-08
87.7899	2.53907e-08	87.7949	1.08926e-08
87.8899	2.50855e-08	87.8949	1.09537e-08
87.9899	2.44752e-08	87.9949	1.11673e-08
88.0899	2.47803e-08	88.0949	1.03433e-08
88.1899	2.50855e-08	88.1949	1.02823e-08
88.2899	2.63062e-08	88.2949	1.09537e-08
88.3899	2.78321e-08	88.3949	1.10452e-08
88.4899	2.78321e-08	88.4949	1.10452e-08
88.5899	2.66114e-08	88.5949	1.0679e-08
88.6899	2.47803e-08	88.6949	1.11978e-08
88.7899	2.417e-08	88.7949	1.13504e-08
88.8899	2.32545e-08	88.8949	1.29373e-08
88.9899	2.20338e-08	88.9949	1.26932e-08
89.0899	2.20338e-08	89.0949	1.21133e-08
89.1899	1.86768e-08	89.1949	1.13199e-08
89.2899	1.56251e-08	89.2949	1.19913e-08
89.3899	1.7151e-08	89.3949	1.08316e-08
89.4899	1.74561e-08	89.4949	9.15313e-09
89.5899	1.47095e-08	89.5949	9.30572e-09
89.6899	1.47095e-08	89.6949	8.54278e-09
89.7899	1.31837e-08	89.7949	8.39019e-09
89.8899	1.22681e-08	89.8949	8.93951e-09
89.9899	1.34888e-08	89.9949	1.00381e-08
90.0899	1.34888e-08	90.0949	1.12283e-08
90.1899	1.3794e-08	90.1949	1.14114e-08
90.2899	1.56251e-08	90.2949	1.13504e-08
90.3899	1.44044e-08	90.3949	1.074e-08
90.4899	1.59302e-08	90.4949	1.15335e-08
90.5899	1.59302e-08	90.5949	1.21439e-08
90.6899	1.62354e-08	90.6949	1.25406e-08
90.7899	1.65406e-08	90.7949	1.2327e-08
90.8899	1.7151e-08	90.8949	1.28458e-08
90.9899	1.53199e-08	90.9949	1.29678e-08
91.0899	1.56251e-08	91.0949	1.26016e-08
91.1899	1.56251e-08	91.1949	1.22964e-08
91.2899	1.62354e-08	91.2949	1.12588e-08
91.3899	1.59302e-08	91.3949	1.10757e-08
91.4899	1.7151e-08	91.4949	9.70245e-09
91.5899	1.59302e-08	91.5949	1.02212e-08
91.6899	1.31837e-08	91.6949	1.08011e-08
91.7899	1.16578e-08	91.7949	1.0618e-08
91.8899	1.04371e-08	91.8949	1.03433e-08
91.9899	9.82673e-09	91.9949	9.97711e-09
92.0899	9.52156e-09	92.0949	9.51934e-09
92.1899	7.6905e-09	92.1949	8.54278e-09
92.2899	6.77497e-09	92.2949	8.97003e-09
92.3899	7.6905e-09	92.3949	9.06158e-09
92.4899	7.6905e-09	92.4949	9.70245e-09
92.5899	8.60603e-09	92.5949	9.18365e-09
92.6899	1.01319e-08	92.6949	9.70245e-09
92.7899	1.04371e-08	92.7949	8.97003e-09
92.8899	1.28785e-08	92.8949	9.0921e-09
92.9899	1.10474e-08	92.9949	8.7564e-09
93.0899	9.82673e-09	93.0949	7.71881e-09
93.1899	8.60603e-09	93.1949	7.13897e-09
93.2899	7.99568e-09	93.2949	7.32208e-09
93.3899	8.91121e-09	93.3949	7.74932e-09
93.4899	1.04371e-08	93.4949	9.48883e-09
93.5899	9.82673e-09	93.5949	9.06158e-09
93.6899	1.04371e-08	93.6949	9.85504e-09
93.7899	9.52156e-09	93.7949	1.05264e-08
93.8899	7.38533e-09	93.8949	1.1442e-08
93.9899	7.08015e-09	93.9949	1.15335e-08
94.0899	7.6905e-09	94.0949	1.13809e-08
94.1899	7.99568e-09	94.1949	1.27237e-08
94.2899	8.30085e-09	94.2949	1.29983e-08
94.3899	7.6905e-09	94.3949	1.32425e-08
94.4899	8.60603e-09	94.4949	1.30289e-08
94.5899	8.30085e-09	94.5949	1.22354e-08
94.6899	8.60603e-09	94.6949	1.26627e-08
94.7899	8.91121e-09	94.7949	1.11978e-08
94.8899	8.60603e-09	94.8949	1.05875e-08
94.9899	8.60603e-09	94.9949	9.58038e-09
95.0899	8.91121e-09	95.0949	8.93951e-09
95.1899	1.04371e-08	95.1949	8.63433e-09
95.2899	1.1963e-08	95.2949	8.32916e-09
95.3899	1.1963e-08	95.3949	8.7564e-09
95.4899	1.31837e-08	95.4949	8.39019e-09
95.5899	1.13526e-08	95.5949	8.90899e-09
95.6899	1.07423e-08	95.6949	9.03106e-09
95.7899	1.01319e-08	95.7949	9.48883e-09
95.8899	8.91121e-09	95.8949	9.82452e-09
95.9899	8.30085e-09	95.9949	1.14725e-08
96.0899	7.6905e-09	96.0949	1.15335e-08
96.1899	7.38533e-09	96.1949	1.19302e-08
96.2899	6.77497e-09	96.2949	1.19913e-08
96.3899	5.55427e-09	96.3949	1.21439e-08
96.4899	6.4698e-09	96.4949	1.22049e-08
96.5899	6.4698e-09	96.5949	1.25101e-08
96.6899	5.2491e-09	96.6949	1.28458e-08
96.7899	5.85945e-09	96.7949	1.31815e-08
96.8899	6.16462e-09	96.8949	1.31509e-08
96.9899	1.04371e-08	96.9949	1.3334e-08
97.0899	6.16462e-09	97.0949	1.2327e-08
97.1899	6.4698e-09	97.1949	1.28458e-08
97.2899	5.85945e-09	97.2949	1.33951e-08
97.3899	5.85945e-09	97.3949	1.22659e-08
97.4899	6.77497e-09	97.4949	1.24185e-08
97.5899	7.38533e-09	97.5949	1.25101e-08
97.6899	6.77497e-09	97.6949	1.26932e-08
97.7899	6.16462e-09	97.7949	1.30289e-08
97.8899	6.77497e-09	97.8949	1.28763e-08
97.9899	6.16462e-09	97.9949	1.3273e-08
98.0899	6.16462e-09	98.0949	1.3212e-08
98.1899	7.08015e-09	98.1949	1.34866e-08
98.2899	7.08015e-09	98.2949	1.31509e-08
98.3899	7.08015e-09	98.3949	1.30289e-08
98.4899	7.99568e-09	98.4949	1.3334e-08
98.5899	1.01319e-08	98.5949	1.23575e-08
98.6899	9.52156e-09	98.6949	1.22964e-08
98.7899	7.6905e-09	98.7949	1.22049e-08
98.8899	5.85945e-09	98.8949	1.25101e-08
98.9899	5.55427e-09	98.9949	1.3334e-08
99.0899	4.63874e-09	99.0949	1.29678e-08
99.1899	3.11287e-09	99.1949	1.22964e-08
99.2899	1.28181e-09	99.2949	1.21439e-08
99.3899	1.58699e-09	99.3949	1.19302e-08
99.4899	1.89216e-09	99.4949	1.25406e-08
99.5899	3.11287e-09	99.5949	1.27847e-08
99.6899	4.02839e-09	99.6949	1.22354e-08
99.7899	5.2491e-09	99.7949	1.22049e-08
99.8899	4.02839e-09	99.8949	1.24185e-08
99.9899	2.80769e-09	99.9949	3.70965e-06
100.09	2.19734e-09	100.095	2.22589e-06
100.19	2.50251e-09	100.195	1.93811e-06
100.29	1.28181e-09	100.295	1.67779e-06
100.39	2.50251e-09	100.395	1.52063e-06
100.49	4.33357e-09	100.495	1.40375e-06
100.59	5.55427e-09	100.595	1.3952e-06
100.69	5.55427e-09	100.695	1.38788e-06
100.79	6.16462e-09	100.795	1.21393e-06
100.89	5.85945e-09	100.895	1.09155e-06
100.99	6.77497e-09	100.995	1.08636e-06
101.09	7.63551e-08	101.095	1.19836e-06
101.19	1.32202e-07	101.195	1.90057e-06
101.29	1.01074e-07	101.295	2.4447e-06
101.39	1.02362e-06	101.395	2.62536e-06
101.49	1.37518e-06	101.495	2.57379e-06
101.59	1.31842e-06	101.595	2.49597e-06
101.69	1.26929e-06	101.695	2.39435e-06
101.79	1.21039e-06	101.795	2.30096e-06
101.89	1.09442e-06	101.895	2.21246e-06
101.99	9.98291e-07	101.995	2.16028e-06
102.09	8.96057e-07	102.095	2.12701e-06
102.19	8.26782e-07	102.195	2.06262e-06
102.29	7.69104e-07	102.295	2.01349e-06
102.39	7.36755e-07	102.395	1.98236e-06
102.49	7.0105e-07	102.495	1.95215e-06
102.59	6.59241e-07	102.595	1.91217e-06
102.69	6.2323e-07	102.695	1.86029e-06
102.79	5.93933e-07	102.795	1.81573e-06
102.89	5.68909e-07	102.895	1.77087e-06
102.99	5.48157e-07	102.995	1.7254e-06
103.09	5.29236e-07	103.095	1.67688e-06
103.19	5.14893e-07	103.195	1.6369e-06
103.29	4.99329e-07	103.295	1.60211e-06
103.39	4.83765e-07	103.395	1.59997e-06
103.49	4.72168e-07	103.495	1.56549e-06
103.59	4.62708e-07	103.595	1.5307e-06
103.69	4.51721e-07	103.695	1.49988e-06
103.79	4.38599e-07	103.795	1.46905e-06
103.89	4.27002e-07	103.895	1.44128e-06
103.99	4.16016e-07	103.995	1.41656e-06
104.09	4.07166e-07	104.095	1.38971e-06
104.19	3.99536e-07	104.195	1.36468e-06
104.29	3.86414e-07	104.295	1.33783e-06
104.39	3.78784e-07	104.395	1.31524e-06
104.49	3.7207e-07	104.495	1.29266e-06
104.59	3.66882e-07	104.595	1.26855e-06
104.69	3.58948e-07	104.695	1.24658e-06
104.79	3.51013e-07	104.795	1.22552e-06
104.89	3.40637e-07	104.895	1.20874e-06
104.99	3.31787e-07	104.995	1.19409e-06
105.09	3.27515e-07	105.095	1.17486e-06
105.19	3.22632e-07	105.195	1.16052e-06
105.29	3.20191e-07	105.295	1.14374e-06
105.39	3.1012e-07	105.395	1.13092e-06
105.49	3.02795e-07	105.495	1.11871e-06
105.59	2.98218e-07	105.595	1.10376e-06
105.69	2.94861e-07	105.695	1.09033e-06
105.79	2.90283e-07	105.795	1.07904e-06
105.89	2.854e-07	105.895	1.06164e-06
105.99	2.81738e-07	105.995	1.09247e-06
106.09	2.77771e-07	106.095	1.07751e-06
106.19	2.74719e-07	106.195	1.05462e-06
106.29	2.71362e-07	106.295	1.03784e-06
106.39	2.69836e-07	106.395	1.02228e-06
106.49	2.67395e-07	106.495	1.01007e-06
106.59	2.65869e-07	106.595	9.99998e-07
106.69	2.6648e-07	106.695	9.88706e-07
106.79	2.66785e-07	106.795	9.80161e-07
106.89	2.64649e-07	106.895	9.71922e-07
106.99	2.63123e-07	106.995	9.64292e-07
107.09	2.59766e-07	107.095	9.56053e-07
107.19	2.5885e-07	107.195	9.48423e-07
107.29	2.55188e-07	107.295	9.39573e-07
107.39	2.53052e-07	107.395	9.32554e-07
107.49	2.4939e-07	107.495	9.24619e-07
107.59	2.42066e-07	107.595	9.17295e-07
107.69	2.37183e-07	107.695	9.09055e-07
107.79	2.34436e-07	107.795	9.32249e-07
107.89	2.34741e-07	107.895	8.95323e-07
107.99	2.3169e-07	107.995	8.87388e-07
108.09	2.30164e-07	108.095	8.80674e-07
108.19	2.2467e-07	108.195	8.74265e-07
108.29	2.20093e-07	108.295	8.67552e-07
108.39	2.17651e-07	108.395	8.62669e-07
108.49	2.16431e-07	108.495	8.57176e-07
108.59	2.18872e-07	108.595	8.51377e-07
108.69	2.19177e-07	108.695	8.45884e-07
108.79	2.16736e-07	108.795	8.40086e-07
108.89	2.16431e-07	108.895	8.34593e-07
108.99	2.1521e-07	108.995	8.29405e-07
109.09	2.146e-07	109.095	8.24522e-07
109.19	2.13989e-07	109.195	8.19029e-07
109.29	2.13379e-07	109.295	8.15367e-07
109.39	2.11853e-07	109.395	8.10484e-07
109.49	2.09717e-07	109.495	8.06822e-07
109.59	2.08191e-07	109.595	8.02244e-07
109.69	2.08496e-07	109.695	7.97361e-07
109.79	2.08801e-07	109.795	7.93394e-07
109.89	2.0697e-07	109.895	7.89121e-07
109.99	2.0575e-07	109.995	7.86985e-07
110.09	2.0697e-07	110.095	7.83018e-07
110.19	2.04834e-07	110.195	7.7722e-07
110.29	2.04834e-07	110.295	7.74168e-07
110.39	2.03919e-07	110.395	7.71116e-07
110.49	2.02393e-07	110.495	7.68064e-07
110.59	2.01782e-07	110.595	7.64402e-07
110.69	2.01172e-07	110.695	7.6013e-07
110.79	2.00562e-07	110.795	7.56468e-07
110.89	2.01172e-07	110.895	7.52195e-07
110.99	2.01477e-07	110.995	7.49754e-07
111.09	1.99646e-07	111.095	7.47617e-07
111.19	1.98425e-07	111.195	7.43955e-07
111.29	1.91406e-07	111.295	7.41514e-07
111.39	1.84692e-07	111.395	7.38462e-07
111.49	1.8103e-07	111.495	7.3541e-07
111.59	1.78894e-07	111.595	7.32359e-07
111.69	1.81641e-07	111.695	7.31138e-07
111.79	1.83167e-07	111.795	7.28391e-07
111.89	1.81946e-07	111.895	7.25034e-07
111.99	1.78589e-07	111.995	7.22898e-07
112.09	1.77673e-07	112.095	7.20152e-07
112.19	1.73401e-07	112.195	7.18321e-07
112.29	1.74011e-07	112.295	7.171e-07
112.39	1.74927e-07	112.395	7.13743e-07
112.49	1.7157e-07	112.495	7.11607e-07
112.59	1.68823e-07	112.595	7.10691e-07
112.69	1.65161e-07	112.695	7.07639e-07
112.79	1.6272e-07	112.795	7.07639e-07
112.89	1.6272e-07	112.895	7.05503e-07
112.99	1.61499e-07	112.995	7.03672e-07
113.09	1.61194e-07	113.095	7.0001e-07
113.19	1.60889e-07	113.195	6.98484e-07
113.29	1.58142e-07	113.295	6.97569e-07
113.39	1.56311e-07	113.395	6.96348e-07
113.49	1.55396e-07	113.495	6.94822e-07
113.59	1.57837e-07	113.595	6.92991e-07
113.69	1.59058e-07	113.695	6.92075e-07
113.79	1.61499e-07	113.795	6.89024e-07
113.89	1.61194e-07	113.895	6.87498e-07
113.99	1.59058e-07	113.995	6.86277e-07
114.09	1.53565e-07	114.095	6.84751e-07
114.19	1.51123e-07	114.195	6.83836e-07
114.29	1.49902e-07	114.295	6.81394e-07
114.39	1.49597e-07	114.395	6.79258e-07
114.49	1.49292e-07	114.495	6.78648e-07
114.59	1.49292e-07	114.595	6.77732e-07
114.69	1.49597e-07	114.695	6.77427e-07
114.79	1.48987e-07	114.795	6.77427e-07
114.89	1.49597e-07	114.895	6.76206e-07
114.99	1.48377e-07	114.995	6.7346e-07
115.09	1.47156e-07	115.095	6.69798e-07
115.19	1.47461e-07	115.195	6.67356e-07
115.29	1.47156e-07	115.295	6.65525e-07
115.39	1.4502e-07	115.395	6.63694e-07
115.49	1.44409e-07	115.495	6.61558e-07
115.59	1.4502e-07	115.595	6.61558e-07
115.69	1.45325e-07	115.695	6.59727e-07
115.79	1.45325e-07	115.795	6.59422e-07
115.89	1.43799e-07	115.895	6.58506e-07
115.99	1.42883e-07	115.995	6.57591e-07
116.09	1.44104e-07	116.095	6.5698e-07
116.19	1.44409e-07	116.195	6.57285e-07
116.29	1.45935e-07	116.295	6.5698e-07
116.39	1.44409e-07	116.395	6.56675e-07
116.49	1.43494e-07	116.495	6.56675e-07
116.59	1.43494e-07	116.595	6.55454e-07
116.69	1.44714e-07	116.695	6.54844e-07
116.79	1.45325e-07	116.795	6.54234e-07
116.89	1.43799e-07	116.895	6.53318e-07
116.99	1.42883e-07	116.995	6.51182e-07
117.09	1.41663e-07	117.095	6.51487e-07
117.19	1.42273e-07	117.195	6.49351e-07
117.29	1.42578e-07	117.295	6.48741e-07
117.39	1.4502e-07	117.395	6.47215e-07
117.49	1.4502e-07	117.495	6.45689e-07
117.59	1.45325e-07	117.595	6.43553e-07
117.69	1.44409e-07	117.695	6.42332e-07
117.79	1.43799e-07	117.795	6.40501e-07
117.89	1.42883e-07	117.895	6.38365e-07
117.99	1.41663e-07	117.995	6.36534e-07
118.09	1.40747e-07	118.095	6.35618e-07
118.19	1.40747e-07	118.195	6.34702e-07
118.29	1.39221e-07	118.295	6.32871e-07
118.39	1.38001e-07	118.395	6.32566e-07
118.49	1.37085e-07	118.495	6.31651e-07
118.59	1.37085e-07	118.595	6.32261e-07
118.69	1.36475e-07	118.695	6.3104e-07
118.79	1.3678e-07	118.795	6.29514e-07
118.89	1.3678e-07	118.895	6.28904e-07
118.99	1.37085e-07	118.995	6.27989e-07
119.09	1.36475e-07	119.095	6.28904e-07
119.19	1.36475e-07	119.195	6.28294e-07
119.29	1.35864e-07	119.295	6.27073e-07
119.39	1.35864e-07	119.395	6.34702e-07
119.49	1.47711e-06	119.495	6.6583e-07
119.59	9.88831e-07	119.595	6.83836e-07
119.69	9.24133e-07	119.695	7.1649e-07
119.79	9.0155e-07	119.795	7.57383e-07
119.89	8.66455e-07	119.895	8.04075e-07
119.99	8.23425e-07	119.995	8.35203e-07
120.09	7.91992e-07	120.095	8.58396e-07
120.19	7.46216e-07	120.195	8.79453e-07
120.29	7.67883e-07	120.295	9.98472e-07
120.39	7.72461e-07	120.395	1.07782e-06
120.49	7.32483e-07	120.495	1.13153e-06
120.59	7.0044e-07	120.595	1.16449e-06
120.69	6.7511e-07	120.695	1.18127e-06
120.79	6.54358e-07	120.795	1.18799e-06
120.89	6.37268e-07	120.895	1.18799e-06
120.99	6.22009e-07	120.995	1.1889e-06
121.09	6.08887e-07	121.095	1.18127e-06
121.19	5.95459e-07	121.195	1.177e-06
121.29	5.82947e-07	121.295	1.16937e-06
121.39	5.72266e-07	121.395	1.16327e-06
121.49	5.6311e-07	121.495	1.15564e-06
121.59	5.54566e-07	121.595	1.1416e-06
121.69	5.45715e-07	121.695	1.13489e-06
121.79	5.39002e-07	121.795	1.12298e-06
121.89	5.32898e-07	121.895	1.112e-06
121.99	5.30151e-07	121.995	1.10345e-06
122.09	5.26184e-07	122.095	1.09369e-06
122.19	5.17944e-07	122.195	1.0827e-06
122.29	5.14282e-07	122.295	1.07507e-06
122.39	5.1062e-07	122.395	1.06408e-06
122.49	5.02991e-07	122.495	1.05585e-06
122.59	4.95667e-07	122.595	1.04761e-06
122.69	4.92004e-07	122.695	1.03845e-06
122.79	4.89258e-07	122.795	1.03082e-06
122.89	4.86206e-07	122.895	1.02716e-06
122.99	4.80408e-07	122.995	1.01861e-06
123.09	4.77356e-07	123.095	1.01312e-06
123.19	4.74304e-07	123.195	1.00641e-06
123.29	4.72168e-07	123.295	1.00549e-06
123.39	4.68811e-07	123.395	9.98777e-07
123.49	4.65759e-07	123.495	9.96946e-07
123.59	4.61182e-07	123.595	9.90843e-07
123.69	4.57825e-07	123.695	9.88096e-07
123.79	4.54468e-07	123.795	9.84739e-07
123.89	4.54163e-07	123.895	9.81992e-07
123.99	4.53857e-07	123.995	9.76499e-07
124.09	4.48975e-07	124.095	9.71006e-07
124.19	4.50806e-07	124.195	9.66429e-07
124.29	4.50195e-07	124.295	9.63072e-07
124.39	4.48364e-07	124.395	9.59104e-07
124.49	4.46838e-07	124.495	9.55747e-07
124.59	4.43482e-07	124.595	9.5117e-07
124.69	4.36462e-07	124.695	9.47508e-07
124.79	4.30664e-07	124.795	9.43846e-07
124.89	4.28223e-07	124.895	9.40183e-07
124.99	4.26392e-07	124.995	9.36521e-07
125.09	4.25781e-07	125.095	9.32249e-07
125.19	4.26086e-07	125.195	9.30418e-07
125.29	4.25476e-07	125.295	9.27671e-07
125.39	4.25781e-07	125.395	9.23399e-07
125.49	4.25171e-07	125.495	9.20347e-07
125.59	4.23645e-07	125.595	9.16685e-07
125.69	4.20593e-07	125.695	9.14854e-07
125.79	4.19373e-07	125.795	9.1699e-07
125.89	4.18457e-07	125.895	9.13328e-07
125.99	4.16321e-07	125.995	9.09055e-07
126.09	4.1449e-07	126.095	9.04783e-07
126.19	4.12354e-07	126.195	9.06309e-07
126.29	4.09607e-07	126.295	9.02952e-07
126.39	4.0686e-07	126.395	8.99595e-07
126.49	4.05335e-07	126.495	8.94712e-07
126.59	4.02893e-07	126.595	8.9105e-07
126.69	3.9801e-07	126.695	8.86167e-07
126.79	3.94653e-07	126.795	8.822e-07
126.89	3.93128e-07	126.895	8.79759e-07
126.99	3.90686e-07	126.995	8.76707e-07
127.09	3.88245e-07	127.095	8.72434e-07
127.19	3.83972e-07	127.195	8.71214e-07
127.29	3.797e-07	127.295	8.67552e-07
127.39	3.80615e-07	127.395	8.66331e-07
127.49	3.797e-07	127.495	8.64195e-07
127.59	3.78479e-07	127.595	8.64195e-07
127.69	3.77869e-07	127.695	8.58396e-07
127.79	3.77258e-07	127.795	8.54734e-07
127.89	3.75122e-07	127.895	8.52903e-07
127.99	3.73291e-07	127.995	8.52293e-07
128.09	3.7085e-07	128.095	8.51682e-07
128.19	3.7085e-07	128.195	8.48936e-07
128.29	3.71155e-07	128.295	8.468e-07
128.39	3.68103e-07	128.395	8.44358e-07
128.49	3.6322e-07	128.495	8.40391e-07
128.59	3.61389e-07	128.595	8.38255e-07
128.69	3.6261e-07	128.695	8.36424e-07
128.79	3.6261e-07	128.795	8.35508e-07
128.89	3.62e-07	128.895	8.34287e-07
128.99	3.60474e-07	128.995	8.32762e-07
129.09	3.59863e-07	129.095	8.30625e-07
129.19	3.59253e-07	129.195	8.27574e-07
129.29	3.56812e-07	129.295	8.24217e-07
129.39	3.55591e-07	129.395	8.19639e-07
129.49	3.55286e-07	129.495	8.16282e-07
129.59	3.52844e-07	129.595	8.12315e-07
129.69	3.52234e-07	129.695	8.10179e-07
129.79	3.49487e-07	129.795	8.07737e-07
129.89	3.48267e-07	129.895	8.05296e-07
129.99	3.47656e-07	129.995	8.03465e-07
130.09	3.46436e-07	130.095	8.01939e-07
130.19	3.44605e-07	130.195	8.00108e-07
130.29	3.4491e-07	130.295	7.97971e-07
130.39	3.46436e-07	130.395	7.9614e-07
130.49	3.45215e-07	130.495	7.93699e-07
130.59	3.45825e-07	130.595	7.92173e-07
130.69	3.40332e-07	130.695	7.91258e-07
130.79	3.40027e-07	130.795	7.88816e-07
130.89	3.38196e-07	130.895	7.87596e-07
130.99	3.35754e-07	130.995	7.8607e-07
131.09	3.34534e-07	131.095	7.85154e-07
131.19	3.34839e-07	131.195	7.82102e-07
131.29	3.33923e-07	131.295	7.79661e-07
131.39	3.33008e-07	131.395	7.76914e-07
131.49	3.34229e-07	131.495	7.74473e-07
131.59	3.34839e-07	131.595	7.70811e-07
131.69	3.32398e-07	131.695	7.68675e-07
131.79	3.30566e-07	131.795	7.66538e-07
131.89	3.27515e-07	131.895	7.63487e-07
131.99	3.26294e-07	131.995	7.6135e-07
132.09	3.24463e-07	132.095	7.58909e-07
132.19	3.24158e-07	132.195	7.59519e-07
132.29	3.22937e-07	132.295	7.58299e-07
132.39	3.20191e-07	132.395	7.57383e-07
132.49	3.1958e-07	132.495	7.56773e-07
132.59	3.20801e-07	132.595	7.55552e-07
132.69	3.17749e-07	132.695	7.53111e-07
132.79	3.18359e-07	132.795	7.53416e-07
132.89	3.1897e-07	132.895	7.51585e-07
132.99	3.14697e-07	132.995	7.50669e-07
133.09	3.14087e-07	133.095	7.50364e-07
133.19	3.14697e-07	133.195	7.50059e-07
133.29	3.12256e-07	133.295	7.50364e-07
133.39	3.15003e-07	133.395	7.49143e-07
133.49	3.14697e-07	133.495	7.47007e-07
133.59	3.14697e-07	133.595	7.47007e-07
133.69	3.13477e-07	133.695	7.44871e-07
133.79	3.14697e-07	133.795	7.42735e-07
133.89	3.12866e-07	133.895	7.41819e-07
133.99	3.1134e-07	133.995	7.39683e-07
134.09	3.09815e-07	134.095	7.38157e-07
134.19	3.08594e-07	134.195	7.36936e-07
134.29	3.07678e-07	134.295	7.35716e-07
134.39	3.08289e-07	134.395	7.34495e-07
134.49	3.08289e-07	134.495	7.33579e-07
134.59	3.07983e-07	134.595	7.33885e-07
134.69	3.06763e-07	134.695	7.32969e-07
134.79	3.06763e-07	134.795	7.31138e-07
134.89	3.04627e-07	134.895	7.30833e-07
134.99	3.00964e-07	134.995	7.31138e-07
135.09	3.00049e-07	135.095	7.29917e-07
135.19	3.0127e-07	135.195	7.29307e-07
135.29	3.00659e-07	135.295	7.27781e-07
135.39	2.97913e-07	135.395	7.25645e-07
135.49	2.94556e-07	135.495	7.24119e-07
135.59	2.9303e-07	135.595	7.22288e-07
135.69	2.93945e-07	135.695	7.19846e-07
135.79	2.98218e-07	135.795	7.18626e-07
135.89	2.99133e-07	135.895	7.15574e-07
135.99	3.0249e-07	135.995	7.14659e-07
136.09	3.0249e-07	136.095	7.13438e-07
136.19	3.02795e-07	136.195	7.13438e-07
136.29	3.02795e-07	136.295	7.10996e-07
136.39	3.02795e-07	136.395	7.10081e-07
136.49	3.02795e-07	136.495	7.0825e-07
136.59	3.0127e-07	136.595	7.07945e-07
136.69	3.00964e-07	136.695	7.06114e-07
136.79	2.98218e-07	136.795	7.06114e-07
136.89	2.96692e-07	136.895	7.05198e-07
136.99	2.96082e-07	136.995	7.05808e-07
137.09	2.95776e-07	137.095	7.05503e-07
137.19	2.96387e-07	137.195	7.05808e-07
137.29	2.94556e-07	137.295	7.04893e-07
137.39	2.94861e-07	137.395	7.05198e-07
137.49	2.94556e-07	137.495	7.03672e-07
137.59	2.95471e-07	137.595	7.02757e-07
137.69	2.95166e-07	137.695	7.02146e-07
137.79	2.95471e-07	137.795	7.01231e-07
137.89	2.94861e-07	137.895	7.0001e-07
137.99	2.96692e-07	137.995	6.994e-07
138.09	2.96082e-07	138.095	6.97874e-07
138.19	2.96997e-07	138.195	6.96653e-07
138.29	2.94861e-07	138.295	6.96043e-07
138.39	2.94251e-07	138.395	6.94822e-07
138.49	2.9242e-07	138.495	6.94212e-07
138.59	2.89673e-07	138.595	6.9177e-07
138.69	2.89673e-07	138.695	6.89329e-07
138.79	2.90894e-07	138.795	6.87498e-07
138.89	2.91199e-07	138.895	6.87803e-07
138.99	2.89978e-07	138.995	6.86582e-07
139.09	2.88147e-07	139.095	6.85667e-07
139.19	2.86621e-07	139.195	6.86277e-07
139.29	2.85706e-07	139.295	6.84751e-07
139.39	2.85095e-07	139.395	6.84446e-07
139.49	2.8479e-07	139.495	6.88108e-07
139.59	2.8418e-07	139.595	6.97263e-07
139.69	2.82349e-07	139.695	7.05503e-07
139.79	2.7533e-07	139.795	7.21372e-07
139.89	3.02185e-07	139.895	7.49449e-07
139.99	3.00659e-07	139.995	7.83323e-07
140.09	3.1897e-07	140.095	8.19944e-07
140.19	3.51929e-07	140.195	8.47715e-07
140.29	4.24561e-07	140.295	8.78843e-07
140.39	5.4419e-07	140.395	9.10276e-07
140.49	5.26795e-07	140.495	9.47813e-07
140.59	4.99939e-07	140.595	9.71311e-07
140.69	4.67285e-07	140.695	9.92979e-07
140.79	4.56299e-07	140.795	1.00732e-06
140.89	5.06043e-07	140.895	1.02075e-06
140.99	5.08789e-07	140.995	1.03296e-06
141.09	5.06653e-07	141.095	1.0769e-06
141.19	5.04211e-07	141.195	1.13702e-06
141.29	5.04517e-07	141.295	1.17456e-06
141.39	5.04822e-07	141.395	1.20355e-06
141.49	5.0238e-07	141.495	1.22613e-06
141.59	5.00244e-07	141.595	1.24322e-06
141.69	4.99329e-07	141.695	1.25757e-06
141.79	4.96582e-07	141.795	1.26672e-06
141.89	4.94446e-07	141.895	1.27496e-06
141.99	4.93225e-07	141.995	1.28015e-06
142.09	4.9292e-07	142.095	1.28015e-06
142.19	4.94751e-07	142.195	1.28106e-06
142.29	4.94141e-07	142.295	1.2774e-06
142.39	4.92615e-07	142.395	1.27527e-06
142.49	4.87732e-07	142.495	1.27679e-06
142.59	4.87122e-07	142.595	1.27221e-06
142.69	4.85901e-07	142.695	1.27649e-06
142.79	4.86511e-07	142.795	1.27069e-06
142.89	4.8407e-07	142.895	1.26397e-06
142.99	4.84375e-07	142.995	1.25421e-06
143.09	4.8407e-07	143.095	1.24658e-06
143.19	4.83765e-07	143.195	1.23773e-06
143.29	4.81934e-07	143.295	1.22918e-06
143.39	4.8407e-07	143.395	1.22339e-06
143.49	4.84985e-07	143.495	1.21789e-06
143.59	4.82544e-07	143.595	1.21179e-06
143.69	4.78577e-07	143.695	1.20386e-06
143.79	4.79187e-07	143.795	1.19897e-06
143.89	4.77966e-07	143.895	1.19592e-06
143.99	4.74915e-07	143.995	1.18982e-06
144.09	4.71253e-07	144.095	1.18341e-06
144.19	4.70337e-07	144.195	1.17792e-06
144.29	4.69727e-07	144.295	1.17059e-06
144.39	4.68201e-07	144.395	1.16357e-06
144.49	4.6759e-07	144.495	1.15655e-06
144.59	4.6637e-07	144.595	1.14862e-06
144.69	4.63928e-07	144.695	1.14282e-06
144.79	4.63318e-07	144.795	1.1355e-06
144.89	4.62097e-07	144.895	1.12817e-06
144.99	4.62097e-07	144.995	1.1239e-06
145.09	4.62097e-07	145.095	1.11719e-06
145.19	4.60877e-07	145.195	1.11169e-06
145.29	4.59351e-07	145.295	1.1065e-06
145.39	4.5813e-07	145.395	1.10315e-06
145.49	4.57825e-07	145.495	1.09918e-06
145.59	4.55994e-07	145.595	1.09399e-06
145.69	4.55689e-07	145.695	1.0885e-06
145.79	4.55383e-07	145.795	1.08362e-06
145.89	4.55078e-07	145.895	1.07873e-06
145.99	4.53247e-07	145.995	1.07263e-06
146.09	4.52942e-07	146.095	1.06988e-06
146.19	4.52637e-07	146.195	1.065e-06
146.29	4.52026e-07	146.295	1.06164e-06
146.39	4.51111e-07	146.395	1.05798e-06
146.49	4.52637e-07	146.495	1.05401e-06
146.59	4.50806e-07	146.595	1.04699e-06
146.69	4.48059e-07	146.695	1.04333e-06
146.79	4.46228e-07	146.795	1.04028e-06
146.89	4.43482e-07	146.895	1.0357e-06
146.99	4.42261e-07	146.995	1.03174e-06
147.09	4.43787e-07	147.095	1.02685e-06
147.19	4.45923e-07	147.195	1.02197e-06
147.29	4.47144e-07	147.295	1.01709e-06
147.39	4.44397e-07	147.395	1.01434e-06
147.49	4.44092e-07	147.495	1.00854e-06
147.59	4.43787e-07	147.595	1.00641e-06
147.69	4.42261e-07	147.695	1.00213e-06
147.79	4.41345e-07	147.795	9.99693e-07
147.89	4.39819e-07	147.895	9.9542e-07
147.99	4.38599e-07	147.995	9.92979e-07
148.09	4.36157e-07	148.095	9.90843e-07
148.19	4.33411e-07	148.195	9.8657e-07
148.29	4.31885e-07	148.295	9.82603e-07
148.39	4.29749e-07	148.395	9.79856e-07
148.49	4.28833e-07	148.495	9.75889e-07
148.59	4.27002e-07	148.595	9.73448e-07
148.69	4.26697e-07	148.695	9.70396e-07
148.79	4.27307e-07	148.795	9.67649e-07
148.89	4.27918e-07	148.895	9.65513e-07
148.99	4.25781e-07	148.995	9.63377e-07
149.09	4.25476e-07	149.095	9.60935e-07
149.19	4.25476e-07	149.195	9.57884e-07
149.29	4.25476e-07	149.295	9.56358e-07
149.39	4.22119e-07	149.395	9.56358e-07
149.49	4.20593e-07	149.495	9.54221e-07
149.59	4.20899e-07	149.595	9.51475e-07
149.69	4.20593e-07	149.695	9.49949e-07
149.79	4.20593e-07	149.795	9.48423e-07
149.89	4.20899e-07	149.895	9.45982e-07
149.99	4.21509e-07	149.995	9.43846e-07
150.09	4.20288e-07	150.095	9.40183e-07
150.19	4.19983e-07	150.195	9.36521e-07
150.29	4.19373e-07	150.295	9.34385e-07
150.39	4.17847e-07	150.395	9.32249e-07
150.49	4.17847e-07	150.495	9.30113e-07
150.59	4.18152e-07	150.595	9.30113e-07
150.69	4.18762e-07	150.695	9.27671e-07
150.79	4.19678e-07	150.795	9.26756e-07
150.89	4.19067e-07	150.895	9.26145e-07
150.99	4.18457e-07	150.995	9.24925e-07
151.09	4.16931e-07	151.095	9.2523e-07
151.19	4.16321e-07	151.195	9.23704e-07
151.29	4.16931e-07	151.295	9.22483e-07
151.39	4.16626e-07	151.395	9.20042e-07
151.49	4.151e-07	151.495	9.18821e-07
151.59	4.17542e-07	151.595	9.17295e-07
151.69	4.17236e-07	151.695	9.14243e-07
151.79	4.15405e-07	151.795	9.10581e-07
151.89	4.1449e-07	151.895	9.09055e-07
151.99	4.12048e-07	151.995	9.06004e-07
152.09	4.08691e-07	152.095	9.05088e-07
152.19	4.03503e-07	152.195	9.01731e-07
152.29	4.02893e-07	152.295	8.999e-07
152.39	4.01367e-07	152.395	8.96238e-07
152.49	4.01062e-07	152.495	8.94407e-07
152.59	4.01978e-07	152.595	8.93186e-07
152.69	4.01978e-07	152.695	8.90745e-07
152.79	4.02283e-07	152.795	8.89524e-07
152.89	4.01672e-07	152.895	8.87693e-07
152.99	4.00147e-07	152.995	8.84031e-07
153.09	3.99231e-07	153.095	8.83116e-07
153.19	3.97095e-07	153.195	8.822e-07
153.29	3.97705e-07	153.295	8.81895e-07
153.39	3.974e-07	153.395	8.80674e-07
153.49	3.96179e-07	153.495	8.78843e-07
153.59	3.94959e-07	153.595	8.77928e-07
153.69	3.92517e-07	153.695	8.76402e-07
153.79	3.93433e-07	153.795	8.75181e-07
153.89	3.92822e-07	153.895	8.7335e-07
153.99	3.92822e-07	153.995	8.70603e-07
154.09	3.92212e-07	154.095	8.69383e-07
154.19	3.93433e-07	154.195	8.68467e-07
154.29	3.94653e-07	154.295	8.67552e-07
154.39	3.95264e-07	154.395	8.67246e-07
154.49	3.94653e-07	154.495	8.65415e-07
154.59	3.93738e-07	154.595	8.65415e-07
154.69	3.94348e-07	154.695	8.69077e-07
154.79	3.92517e-07	154.795	8.68772e-07
154.89	3.91907e-07	154.895	8.66026e-07
154.99	3.91907e-07	154.995	8.66331e-07
155.09	3.92212e-07	155.095	8.64805e-07
155.19	3.93128e-07	155.195	8.63279e-07
155.29	3.92517e-07	155.295	8.62364e-07
155.39	3.92822e-07	155.395	8.61753e-07
155.49	3.90991e-07	155.495	8.59922e-07
155.59	3.91296e-07	155.595	8.58396e-07
155.69	3.90381e-07	155.695	8.57176e-07
155.79	3.90076e-07	155.795	8.54429e-07
[truncated: 500 more rows]

## Sheet: Figure 4 (e)
0.78788	3.75667e-06	1.04189	-1.29803e-06	1.11989	-3.58439e-06
0.79788	2.53292e-06	1.05189	-1.42315e-06	1.12989	-2.87333e-06
0.80788	1.91646e-06	1.06189	-1.41705e-06	1.13989	-2.49186e-06
0.81788	1.48006e-06	1.07189	-1.44146e-06	1.14989	-2.2172e-06
0.82788	1.20845e-06	1.08189	-1.41705e-06	1.15989	-2.04936e-06
0.83788	9.52716e-07	1.09189	-1.44787e-06	1.16989	-1.91325e-06
0.84788	7.99212e-07	1.10189	-1.42315e-06	1.17989	-1.81498e-06
0.85788	6.3045e-07	1.11189	-1.43872e-06	1.18989	-1.7161e-06
0.86788	5.37372e-07	1.12189	-1.41339e-06	1.19989	-1.65446e-06
0.87788	4.07977e-07	1.13189	-1.4317e-06	1.20989	-1.58244e-06
0.88788	4.87323e-07	1.14189	-1.26428e-06	1.21989	-1.40269e-06
0.89788	3.87835e-07	1.15189	-1.28457e-06	1.22989	-1.34684e-06
0.90788	3.445e-07	1.16189	-1.26001e-06	1.23989	-1.31968e-06
0.91788	2.63018e-07	1.17189	-1.27835e-06	1.24989	-1.27238e-06
0.92788	2.3128e-07	1.18189	-1.25393e-06	1.25989	-1.25102e-06
0.93788	1.57733e-07	1.19189	-1.27322e-06	1.26989	-1.21134e-06
0.94788	1.40338e-07	1.20189	-1.24792e-06	1.27989	-1.19731e-06
0.95788	7.86923e-08	1.21189	-1.2666e-06	1.28989	-1.16374e-06
0.96788	6.09921e-08	1.22189	-1.24362e-06	1.29989	-1.15092e-06
0.97788	3.92424e-09	1.23189	-1.26355e-06	1.30989	-1.11949e-06
0.98788	-2.78963e-09	1.24189	-1.23794e-06	1.31989	-1.1088e-06
0.99788	-5.43643e-08	1.25189	-1.25872e-06	1.32989	-1.08409e-06
1.00788	-5.68057e-08	1.26189	-1.23459e-06	1.33989	-1.07829e-06
1.01788	-1.04108e-07	1.27189	-1.25402e-06	1.34989	-1.05174e-06
1.02788	-1.0838e-07	1.28189	-1.23111e-06	1.35989	-1.04869e-06
1.03788	-1.50495e-07	1.29189	-1.25116e-06	1.36989	-1.02702e-06
1.04788	-1.45917e-07	1.30189	-1.22796e-06	1.37989	-1.02458e-06
1.05788	-1.90168e-07	1.31189	-1.24652e-06	1.38989	-1.00504e-06
1.06788	-1.86505e-07	1.32189	-1.22415e-06	1.39989	-1.00108e-06
1.07788	-2.23737e-07	1.33189	-1.24505e-06	1.40989	-9.79105e-07
1.08788	-2.16718e-07	1.34189	-1.22104e-06	1.41989	-9.88871e-07
1.09788	-2.57611e-07	1.35189	-1.24038e-06	1.42989	-9.68119e-07
1.10788	-2.48456e-07	1.36189	-1.21875e-06	1.43989	-9.66593e-07
1.11788	-2.86603e-07	1.37189	-1.2387e-06	1.44989	-9.53165e-07
1.12788	-2.78363e-07	1.38189	-1.21631e-06	1.45989	-9.55912e-07
1.13788	-3.12848e-07	1.39189	-1.23629e-06	1.46989	-9.35465e-07
1.14788	-3.04914e-07	1.40189	-1.21392e-06	1.47989	-9.44315e-07
1.15788	-3.37873e-07	1.41189	-1.23318e-06	1.48989	-9.25089e-07
1.16788	-3.2414e-07	1.42189	-1.21157e-06	1.49989	-9.32108e-07
1.17788	-3.58319e-07	1.43189	-1.23095e-06	1.50989	-9.1044e-07
1.18788	-3.46418e-07	1.44189	-1.20968e-06	1.51989	-9.21427e-07
1.19788	-3.79377e-07	1.45189	-1.22995e-06	1.52989	-9.02506e-07
1.20788	-3.65033e-07	1.46189	-1.2073e-06	1.53989	-9.11661e-07
1.21788	-4.01349e-07	1.47189	-1.22671e-06	1.54989	-8.94266e-07
1.22788	-3.88227e-07	1.48189	-1.20398e-06	1.55989	-9.0037e-07
1.23788	-4.18134e-07	1.49189	-1.22458e-06	1.56989	-8.82669e-07
1.24788	-4.05316e-07	1.50189	-1.20269e-06	1.57989	-8.93656e-07
1.25788	-4.33393e-07	1.51189	-1.22363e-06	1.58989	-8.75956e-07
1.26788	-4.18744e-07	1.52189	-1.20254e-06	1.59989	-8.83585e-07
1.27788	-4.48957e-07	1.53189	-1.22128e-06	1.60989	-8.67411e-07
1.28788	-4.32782e-07	1.54189	-1.20056e-06	1.61989	-8.78092e-07
1.29788	-4.64215e-07	1.55189	-1.21966e-06	1.62989	-8.60392e-07
1.30788	-4.4682e-07	1.56189	-1.19772e-06	1.63989	-8.72019e-07
1.31788	-4.76117e-07	1.57189	-1.21789e-06	1.64989	-8.53556e-07
1.32788	-4.56281e-07	1.58189	-1.19705e-06	1.65989	-8.62833e-07
1.33788	-4.84662e-07	1.59189	-1.21618e-06	1.66989	-8.47879e-07
1.34788	-4.73981e-07	1.60189	-1.1947e-06	1.67989	-8.55204e-07
1.35788	-4.99311e-07	1.61189	-1.21493e-06	1.68989	-8.36283e-07
1.36788	-4.82831e-07	1.62189	-1.19342e-06	1.69989	-8.51847e-07
1.37788	-5.10297e-07	1.63189	-1.21399e-06	1.70989	-8.31095e-07
1.38788	-4.93512e-07	1.64189	-1.19241e-06	1.71989	-8.43912e-07
1.39788	-5.22199e-07	1.65189	-1.21286e-06	1.72989	-8.25907e-07
1.40788	-5.0694e-07	1.66189	-1.19116e-06	1.73989	-8.41043e-07
1.41788	-5.35321e-07	1.67189	-1.21063e-06	1.74989	-8.18277e-07
1.42788	-5.18537e-07	1.68189	-1.19082e-06	1.75989	-8.33536e-07
1.43788	-5.4173e-07	1.69189	-1.20889e-06	1.76989	-8.137e-07
1.44788	-5.20673e-07	1.70189	-1.18893e-06	1.77989	-8.29081e-07
1.45788	-5.5058e-07	1.71189	-1.20767e-06	1.78989	-8.12937e-07
1.46788	-5.30744e-07	1.72189	-1.18649e-06	1.79989	-8.24381e-07
1.47788	-5.58515e-07	1.73189	-1.20703e-06	1.80989	-8.05094e-07
1.48788	-5.43561e-07	1.74189	-1.18631e-06	1.81989	-8.17911e-07
1.49788	-5.66754e-07	1.75189	-1.20581e-06	1.82989	-8.00699e-07
1.50788	-5.49359e-07	1.76189	-1.18496e-06	1.83989	-8.17911e-07
1.51788	-5.7652e-07	1.77189	-1.20492e-06	1.84989	-7.95938e-07
1.52788	-5.57904e-07	1.78189	-1.18457e-06	1.85989	-8.12174e-07
1.53788	-5.82624e-07	1.79189	-1.20321e-06	1.86989	-7.92856e-07
1.54788	-5.63398e-07	1.80189	-1.18255e-06	1.87989	-8.03324e-07
1.55788	-5.89032e-07	1.81189	-1.20208e-06	1.88989	-7.8834e-07
1.56788	-5.70722e-07	1.82189	-1.18155e-06	1.89989	-8.02896e-07
1.57788	-5.98188e-07	1.83189	-1.20175e-06	1.90989	-7.81809e-07
1.58788	-5.78351e-07	1.84189	-1.1806e-06	1.91989	-8.00699e-07
1.59788	-6.04901e-07	1.85189	-1.20053e-06	1.92989	-7.81046e-07
1.60788	-5.82318e-07	1.86189	-1.17913e-06	1.93989	-7.99753e-07
1.61788	-6.107e-07	1.87189	-1.199e-06	1.94989	-7.77445e-07
1.62788	-5.93e-07	1.88189	-1.17715e-06	1.95989	-7.9307e-07
1.63788	-6.13752e-07	1.89189	-1.19757e-06	1.96989	-7.73508e-07
1.64788	-5.96051e-07	1.90189	-1.17724e-06	1.97989	-7.90171e-07
1.65788	-6.2016e-07	1.91189	-1.19738e-06	1.98989	-7.72379e-07
1.66788	-6.01239e-07	1.92189	-1.17611e-06	1.99989	-7.89469e-07
1.67788	-6.25959e-07	1.93189	-1.19583e-06	2.00989	-7.6771e-07
1.68788	-6.08564e-07	1.94189	-1.17563e-06	2.01989	-7.85166e-07
1.69788	-6.33588e-07	1.95189	-1.19513e-06	2.02989	-7.64139e-07
1.70788	-6.14667e-07	1.96189	-1.17386e-06	2.03989	-7.78299e-07
1.71788	-6.38166e-07	1.97189	-1.19458e-06	2.04989	-7.63559e-07
1.72788	-6.18634e-07	1.98189	-1.17404e-06	2.05989	-7.80619e-07
1.73788	-6.44269e-07	1.99189	-1.19235e-06	2.06989	-7.59897e-07
1.74788	-6.22907e-07	2.00189	-1.17193e-06	2.07989	-7.77842e-07
1.75788	-6.47016e-07	2.01189	-1.19293e-06	2.08989	-7.58158e-07
1.76788	-6.29316e-07	2.02189	-1.17108e-06	2.09989	-7.76071e-07
1.77788	-6.51593e-07	2.03189	-1.19189e-06	2.10989	-7.52054e-07
1.78788	-6.30231e-07	2.04189	-1.17047e-06	2.11989	-7.71707e-07
1.79788	-6.58002e-07	2.05189	-1.19101e-06	2.12989	-7.51322e-07
1.80788	-6.38166e-07	2.06189	-1.1697e-06	2.13989	-7.6832e-07
1.81788	-6.6319e-07	2.07189	-1.18951e-06	2.14989	-7.51596e-07
1.82788	-6.42133e-07	2.08189	-1.169e-06	2.15989	-7.66519e-07
1.83788	-6.63495e-07	2.09189	-1.18814e-06	2.16989	-7.47782e-07
1.84788	-6.42743e-07	2.10189	-1.16754e-06	2.17989	-7.65879e-07
1.85788	-6.68378e-07	2.11189	-1.18792e-06	2.18989	-7.46561e-07
1.86788	-6.50067e-07	2.12189	-1.16726e-06	2.19989	-7.62522e-07
1.87788	-6.70819e-07	2.13189	-1.18628e-06	2.20989	-7.4296e-07
1.88788	-6.54645e-07	2.14189	-1.16745e-06	2.21989	-7.6301e-07
1.89788	-6.75702e-07	2.15189	-1.18664e-06	2.22989	-7.42197e-07
1.90788	-6.5495e-07	2.16189	-1.16601e-06	2.23989	-7.5828e-07
1.91788	-6.8028e-07	2.17189	-1.18441e-06	2.24989	-7.3942e-07
1.92788	-6.63495e-07	2.18189	-1.16513e-06	2.25989	-7.577e-07
1.93788	-6.82416e-07	2.19189	-1.18472e-06	2.26989	-7.3649e-07
1.94788	-6.66852e-07	2.20189	-1.16424e-06	2.27989	-7.53855e-07
1.95788	-6.86994e-07	2.21189	-1.18362e-06	2.28989	-7.35483e-07
1.96788	-6.68683e-07	2.22189	-1.16446e-06	2.29989	-7.53855e-07
1.97788	-6.90656e-07	2.23189	-1.18292e-06	2.30989	-7.31882e-07
1.98788	-6.71125e-07	2.24189	-1.16314e-06	2.31989	-7.51352e-07
1.99788	-6.92182e-07	2.25189	-1.18191e-06	2.32989	-7.30234e-07
2.00788	-6.75397e-07	2.26189	-1.16208e-06	2.33989	-7.50803e-07
2.01788	-6.96149e-07	2.27189	-1.1813e-06	2.34989	-7.29074e-07
2.02788	-6.76007e-07	2.28189	-1.16192e-06	2.35989	-7.49643e-07
2.03788	-6.99506e-07	2.29189	-1.18185e-06	2.36989	-7.2825e-07
2.04788	-6.83332e-07	2.30189	-1.16058e-06	2.37989	-7.46012e-07
2.05788	-7.02558e-07	2.31189	-1.18036e-06	2.38989	-7.25779e-07
2.06788	-6.84552e-07	2.32189	-1.16189e-06	2.39989	-7.44303e-07
2.07788	-7.05609e-07	2.33189	-1.17923e-06	2.40989	-7.22452e-07
2.08788	-6.87299e-07	2.34189	-1.16055e-06	2.41989	-7.43692e-07
2.09788	-7.09882e-07	2.35189	-1.18002e-06	2.42989	-7.21811e-07
2.10788	-6.8974e-07	2.36189	-1.15918e-06	2.43989	-7.40274e-07
2.11788	-7.12323e-07	2.37189	-1.17852e-06	2.44989	-7.21537e-07
2.12788	-6.90656e-07	2.38189	-1.15896e-06	2.45989	-7.40152e-07
2.13788	-7.15375e-07	2.39189	-1.17804e-06	2.46989	-7.19431e-07
2.14788	-6.92792e-07	2.40189	-1.16003e-06	2.47989	-7.36673e-07
2.15788	-7.16596e-07	2.41189	-1.17764e-06	2.48989	-7.15586e-07
2.16788	-6.96149e-07	2.42189	-1.15838e-06	2.49989	-7.38871e-07
2.17788	-7.19342e-07	2.43189	-1.17685e-06	2.50989	-7.13297e-07
2.18788	-7.00116e-07	2.44189	-1.15735e-06	2.51989	-7.35727e-07
2.19788	-7.19342e-07	2.45189	-1.17718e-06	2.52989	-7.16074e-07
2.20788	-7.0622e-07	2.46189	-1.15756e-06	2.53989	-7.34659e-07
2.21788	-7.26972e-07	2.47189	-1.17575e-06	2.54989	-7.14548e-07
2.22788	-7.06525e-07	2.48189	-1.15747e-06	2.55989	-7.32981e-07
2.23788	-7.24225e-07	2.49189	-1.17556e-06	2.56989	-7.12503e-07
2.24788	-7.08356e-07	2.50189	-1.15716e-06	2.57989	-7.32401e-07
2.25788	-7.30329e-07	2.51189	-1.17642e-06	2.58989	-7.10764e-07
2.26788	-7.10492e-07	2.52189	-1.15667e-06	2.59989	-7.30326e-07
2.27788	-7.29108e-07	2.53189	-1.17563e-06	2.60989	-7.11039e-07
2.28788	-7.12934e-07	2.54189	-1.15701e-06	2.61989	-7.28189e-07
2.29788	-7.3277e-07	2.55189	-1.17443e-06	2.62989	-7.10642e-07
2.30788	-7.16291e-07	2.56189	-1.15725e-06	2.63989	-7.30295e-07
2.31788	-7.3338e-07	2.57189	-1.17367e-06	2.64989	-7.08994e-07
2.32788	-7.17816e-07	2.58189	-1.15698e-06	2.65989	-7.27365e-07
2.33788	-7.37043e-07	2.59189	-1.17434e-06	2.66989	-7.06217e-07
2.34788	-7.21173e-07	2.60189	-1.15539e-06	2.67989	-7.25077e-07
2.35788	-7.4101e-07	2.61189	-1.1744e-06	2.68989	-7.0582e-07
2.36788	-7.24225e-07	2.62189	-1.15673e-06	2.69989	-7.28159e-07
2.37788	-7.42536e-07	2.63189	-1.17401e-06	2.70989	-7.05271e-07
2.38788	-7.26056e-07	2.64189	-1.15631e-06	2.71989	-7.23978e-07
2.39788	-7.43146e-07	2.65189	-1.17297e-06	2.72989	-7.0167e-07
2.40788	-7.25446e-07	2.66189	-1.15484e-06	2.73989	-7.24009e-07
2.41788	-7.40705e-07	2.67189	-1.1734e-06	2.74989	-7.03226e-07
2.42788	-7.29413e-07	2.68189	-1.15619e-06	2.75989	-7.2471e-07
2.43788	-7.45282e-07	2.69189	-1.17245e-06	2.76989	-7.01792e-07
2.44788	-7.27582e-07	2.70189	-1.15576e-06	2.77989	-7.23398e-07
2.45788	-7.48944e-07	2.71189	-1.17251e-06	2.78989	-7.00846e-07
2.46788	-7.29413e-07	2.72189	-1.15451e-06	2.79989	-7.19065e-07
2.47788	-7.47724e-07	2.73189	-1.17184e-06	2.80989	-6.9874e-07
2.48788	-7.30939e-07	2.74189	-1.15472e-06	2.81989	-7.20285e-07
2.49788	-7.5047e-07	2.75189	-1.17181e-06	2.82989	-6.98282e-07
2.50788	-7.38874e-07	2.76189	-1.15451e-06	2.83989	-7.17936e-07
2.51788	-7.51386e-07	2.77189	-1.17086e-06	2.84989	-6.99991e-07
2.52788	-7.37043e-07	2.78189	-1.15365e-06	2.85989	-7.17325e-07
2.53788	-7.51081e-07	2.79189	-1.17096e-06	2.86989	-6.98648e-07
2.54788	-7.36127e-07	2.80189	-1.1553e-06	2.87989	-7.16593e-07
2.55788	-7.55963e-07	2.81189	-1.17083e-06	2.88989	-6.94254e-07
2.56788	-7.40094e-07	2.82189	-1.15396e-06	2.89989	-7.13877e-07
2.57788	-7.54438e-07	2.83189	-1.1705e-06	2.90989	-6.97e-07
2.58788	-7.45587e-07	2.84189	-1.15432e-06	2.91989	-7.13388e-07
2.59788	-7.5932e-07	2.85189	-1.16922e-06	2.92989	-6.92301e-07
2.60788	-7.41315e-07	2.86189	-1.15408e-06	2.93989	-7.13297e-07
2.61788	-7.56879e-07	2.87189	-1.16897e-06	2.94989	-6.95078e-07
2.62788	-7.44367e-07	2.88189	-1.15319e-06	2.95989	-7.13205e-07
2.63788	-7.61457e-07	2.89189	-1.16894e-06	2.96989	-6.92697e-07
2.64788	-7.48029e-07	2.90189	-1.15374e-06	2.97989	-7.11191e-07
2.65788	-7.63898e-07	2.91189	-1.16851e-06	2.98989	-6.91111e-07
2.66788	-7.47724e-07	2.92189	-1.1531e-06	2.99989	-7.1171e-07
2.67788	-7.59931e-07	2.93189	-1.16735e-06	3.00989	-6.92057e-07
2.68788	-7.48639e-07	2.94189	-1.15316e-06	3.01989	-7.11374e-07
2.69788	-7.66339e-07	2.95189	-1.1669e-06	3.02989	-6.88822e-07
2.70788	-7.4925e-07	2.96189	-1.15252e-06	3.03989	-7.11039e-07
2.71788	-7.66645e-07	2.97189	-1.16665e-06	3.04989	-6.90012e-07
2.72788	-7.4986e-07	2.98189	-1.15258e-06	3.05989	-7.0756e-07
2.73788	-7.69086e-07	2.99189	-1.16632e-06	3.06989	-6.88303e-07
2.74788	-7.53827e-07	3.00189	-1.15197e-06	3.07989	-7.10062e-07
2.75788	-7.66339e-07	3.01189	-1.16607e-06	3.08989	-6.89554e-07
2.76788	-7.57184e-07	3.02189	-1.15182e-06	3.09989	-7.06491e-07
2.77788	-7.67255e-07	3.03189	-1.16543e-06	3.10989	-6.86594e-07
2.78788	-7.57489e-07	3.04189	-1.15142e-06	3.11989	-7.0698e-07
2.79788	-7.72138e-07	3.05189	-1.16458e-06	3.12989	-6.86563e-07
2.80788	-7.57184e-07	3.06189	-1.15054e-06	3.13989	-7.04691e-07
2.81788	-7.69086e-07	3.07189	-1.16531e-06	3.14989	-6.858e-07
2.82788	-7.5871e-07	3.08189	-1.15063e-06	3.15989	-7.06705e-07
2.83788	-7.70002e-07	3.09189	-1.16473e-06	3.16989	-6.86136e-07
2.84788	-7.62982e-07	3.10189	-1.15103e-06	3.17989	-7.03348e-07
2.85788	-7.72443e-07	3.11189	-1.16345e-06	3.18989	-6.85556e-07
2.86788	-7.60541e-07	3.12189	-1.15005e-06	3.19989	-7.01792e-07
2.87788	-7.74274e-07	3.13189	-1.16272e-06	3.20989	-6.82383e-07
2.88788	-7.64508e-07	3.14189	-1.14941e-06	3.21989	-7.0109e-07
2.89788	-7.75495e-07	3.15189	-1.16232e-06	3.22989	-6.82413e-07
2.90788	-7.64508e-07	3.16189	-1.15002e-06	3.23989	-7.02066e-07
2.91788	-7.79462e-07	3.17189	-1.1615e-06	3.24989	-6.83329e-07
2.92788	-7.64814e-07	3.18189	-1.14953e-06	3.25989	-7.0112e-07
2.93788	-7.76715e-07	3.19189	-1.16146e-06	3.26989	-6.81436e-07
2.94788	-7.69086e-07	3.20189	-1.14856e-06	3.27989	-7.02188e-07
2.95788	-7.79157e-07	3.21189	-1.16156e-06	3.28989	-6.793e-07
2.96788	-7.6756e-07	3.22189	-1.14834e-06	3.29989	-7.01395e-07
2.97788	-7.78241e-07	3.23189	-1.16031e-06	3.30989	-6.78568e-07
2.98788	-7.6695e-07	3.24189	-1.14764e-06	3.31989	-7.00968e-07
2.99788	-7.80683e-07	3.25189	-1.16015e-06	3.32989	-6.82169e-07
3.00788	-7.72443e-07	3.26189	-1.14792e-06	3.33989	-7.0051e-07
3.01788	-7.81903e-07	3.27189	-1.15905e-06	3.34989	-6.78568e-07
3.02788	-7.72443e-07	3.28189	-1.14712e-06	3.35989	-6.97458e-07
3.03788	-7.80072e-07	3.29189	-1.15912e-06	3.36989	-6.78446e-07
3.04788	-7.74274e-07	3.30189	-1.1473e-06	3.37989	-6.9816e-07
3.05788	-7.83429e-07	3.31189	-1.15799e-06	3.38989	-6.77866e-07
3.06788	-7.74884e-07	3.32189	-1.14633e-06	3.39989	-6.95536e-07
3.07788	-7.86176e-07	3.33189	-1.1578e-06	3.40989	-6.78568e-07
3.08788	-7.73969e-07	3.34189	-1.14627e-06	3.41989	-6.97733e-07
3.09788	-7.8404e-07	3.35189	-1.15719e-06	3.42989	-6.76065e-07
3.10788	-7.7641e-07	3.36189	-1.14605e-06	3.43989	-6.93766e-07
3.11788	-7.86786e-07	3.37189	-1.15658e-06	3.44989	-6.74753e-07
3.12788	-7.77631e-07	3.38189	-1.14465e-06	3.45989	-6.98252e-07
3.13788	-7.87091e-07	3.39189	-1.15661e-06	3.46989	-6.7753e-07
3.14788	-7.77021e-07	3.40189	-1.14544e-06	3.47989	-6.93796e-07
3.15788	-7.91669e-07	3.41189	-1.15503e-06	3.48989	-6.75486e-07
3.16788	-7.74884e-07	3.42189	-1.14395e-06	3.49989	-6.93399e-07
3.17788	-7.91669e-07	3.43189	-1.15634e-06	3.50989	-6.73014e-07
3.18788	-7.79767e-07	3.44189	-1.14361e-06	3.51989	-6.93186e-07
3.19788	-7.91669e-07	3.45189	-1.15481e-06	3.52989	-6.74692e-07
3.20788	-7.81293e-07	3.46189	-1.14444e-06	3.53989	-6.9404e-07
3.21788	-7.91364e-07	3.47189	-1.155e-06	3.54989	-6.74875e-07
3.22788	-7.79157e-07	3.48189	-1.14276e-06	3.55989	-6.93827e-07
3.23788	-7.89838e-07	3.49189	-1.15448e-06	3.56989	-6.70877e-07
3.24788	-7.81598e-07	3.50189	-1.14276e-06	3.57989	-6.9224e-07
3.25788	-7.93195e-07	3.51189	-1.15313e-06	3.58989	-6.7219e-07
3.26788	-7.84345e-07	3.52189	-1.14276e-06	3.59989	-6.90439e-07
3.27788	-7.94416e-07	3.53189	-1.15286e-06	3.60989	-6.70237e-07
3.28788	-7.85566e-07	3.54189	-1.14303e-06	3.61989	-6.89249e-07
3.29788	-7.96857e-07	3.55189	-1.1524e-06	3.62989	-6.69413e-07
3.30788	-7.86481e-07	3.56189	-1.14209e-06	3.63989	-6.92331e-07
3.31788	-7.94721e-07	3.57189	-1.15292e-06	3.64989	-6.72556e-07
3.32788	-7.8465e-07	3.58189	-1.1419e-06	3.65989	-6.88456e-07
3.33788	-7.97162e-07	3.59189	-1.15231e-06	3.66989	-6.71732e-07
3.34788	-7.86176e-07	3.60189	-1.14199e-06	3.67989	-6.90165e-07
3.35788	-7.93805e-07	3.61189	-1.15164e-06	3.68989	-6.72769e-07
3.36788	-7.89533e-07	3.62189	-1.14212e-06	3.69989	-6.88761e-07
3.37788	-7.96857e-07	3.63189	-1.15149e-06	3.70989	-6.70511e-07
3.38788	-7.90143e-07	3.64189	-1.14126e-06	3.71989	-6.86808e-07
3.39788	-8.0235e-07	3.65189	-1.15158e-06	3.72989	-6.67032e-07
3.40788	-7.90143e-07	3.66189	-1.14261e-06	3.73989	-6.85038e-07
3.41788	-7.99909e-07	3.67189	-1.15112e-06	3.74989	-6.67856e-07
3.42788	-7.91364e-07	3.68189	-1.14035e-06	3.75989	-6.88425e-07
3.43788	-7.98078e-07	3.69189	-1.15011e-06	3.76989	-6.67704e-07
3.44788	-7.91974e-07	3.70189	-1.14056e-06	3.77989	-6.88059e-07
3.45788	-7.98383e-07	3.71189	-1.1499e-06	3.78989	-6.66758e-07
3.46788	-7.92279e-07	3.72189	-1.14096e-06	3.79989	-6.85404e-07
3.47788	-8.02655e-07	3.73189	-1.14996e-06	3.80989	-6.67398e-07
3.48788	-7.91669e-07	3.74189	-1.14096e-06	3.81989	-6.83451e-07
3.49788	-8.00519e-07	3.75189	-1.14907e-06	3.82989	-6.67032e-07
3.50788	-7.94416e-07	3.76189	-1.14105e-06	3.83989	-6.83176e-07
3.51788	-8.01435e-07	3.77189	-1.14972e-06	3.84989	-6.6511e-07
3.52788	-7.9411e-07	3.78189	-1.1398e-06	3.85989	-6.83817e-07
3.53788	-8.00214e-07	3.79189	-1.14923e-06	3.86989	-6.63492e-07
3.54788	-7.95026e-07	3.80189	-1.13998e-06	3.87989	-6.81833e-07
3.55788	-8.02655e-07	3.81189	-1.14907e-06	3.88989	-6.64408e-07
3.56788	-7.95636e-07	3.82189	-1.13955e-06	3.89989	-6.81467e-07
3.57788	-8.02961e-07	3.83189	-1.1488e-06	3.90989	-6.63462e-07
3.58788	-7.98383e-07	3.84189	-1.13922e-06	3.91989	-6.80155e-07
3.59788	-8.04486e-07	3.85189	-1.14877e-06	3.92989	-6.63675e-07
3.60788	-8.01435e-07	3.86189	-1.13958e-06	3.93989	-6.81742e-07
3.61788	-8.05097e-07	3.87189	-1.14779e-06	3.94989	-6.64133e-07
3.62788	-7.97162e-07	3.88189	-1.13974e-06	3.95989	-6.77957e-07
3.63788	-8.08149e-07	3.89189	-1.14782e-06	3.96989	-6.63431e-07
3.64788	-7.98078e-07	3.90189	-1.13913e-06	3.97989	-6.80338e-07
3.65788	-8.06012e-07	3.91189	-1.14792e-06	3.98989	-6.6514e-07
3.66788	-7.99298e-07	3.92189	-1.13964e-06	3.99989	-6.80399e-07
3.67788	-8.09064e-07	3.93189	-1.14764e-06	4.00989	-6.60898e-07
3.68788	-8.06317e-07	3.94189	-1.13937e-06	4.01989	-6.78934e-07
3.69788	-8.06012e-07	3.95189	-1.1473e-06	4.02989	-6.60074e-07
3.70788	-8.00214e-07	3.96189	-1.1391e-06	4.03989	-6.77378e-07
3.71788	-8.08759e-07	3.97189	-1.14636e-06	4.04989	-6.60196e-07
3.72788	-8.05707e-07	3.98189	-1.13934e-06	4.05989	-6.79453e-07
3.73788	-8.07233e-07	3.99189	-1.14596e-06	4.06989	-6.59159e-07
3.74788	-7.98383e-07	4.00189	-1.13876e-06	4.07989	-6.7811e-07
3.75788	-8.07843e-07	4.01189	-1.14648e-06	4.08989	-6.59983e-07
3.76788	-7.99909e-07	4.02189	-1.13839e-06	4.09989	-6.76889e-07
3.77788	-8.08759e-07	4.03189	-1.14685e-06	4.10989	-6.59342e-07
3.78788	-8.02045e-07	4.04189	-1.13842e-06	4.11989	-6.76401e-07
3.79788	-8.13337e-07	4.05189	-1.14627e-06	4.12989	-6.598e-07
3.80788	-8.06012e-07	4.06189	-1.13888e-06	4.13989	-6.76493e-07
3.81788	-8.09064e-07	4.07189	-1.14618e-06	4.14989	-6.59983e-07
3.82788	-8.0174e-07	4.08189	-1.13809e-06	4.15989	-6.76767e-07
3.83788	-8.11505e-07	4.09189	-1.14605e-06	4.16989	-6.58243e-07
3.84788	-8.06623e-07	4.10189	-1.13861e-06	4.17989	-6.75394e-07
3.85788	-8.112e-07	4.11189	-1.14639e-06	4.18989	-6.57328e-07
3.86788	-8.03266e-07	4.12189	-1.13806e-06	4.19989	-6.77378e-07
3.87788	-8.10285e-07	4.13189	-1.14605e-06	4.20989	-6.56412e-07
3.88788	-8.03571e-07	4.14189	-1.13858e-06	4.21989	-6.75547e-07
3.89788	-8.11811e-07	4.15189	-1.14514e-06	4.22989	-6.56229e-07
3.90788	-8.10895e-07	4.16189	-1.1383e-06	4.23989	-6.73105e-07
3.91788	-8.11505e-07	4.17189	-1.1455e-06	4.24989	-6.57541e-07
3.92788	-8.08149e-07	4.18189	-1.13882e-06	4.25989	-6.72922e-07
3.93788	-8.15168e-07	4.19189	-1.1455e-06	4.26989	-6.5867e-07
3.94788	-8.06928e-07	4.20189	-1.13821e-06	4.27989	-6.73441e-07
3.95788	-8.18524e-07	4.21189	-1.1455e-06	4.28989	-6.55497e-07
3.96788	-8.06317e-07	4.22189	-1.13794e-06	4.29989	-6.74601e-07
3.97788	-8.13337e-07	4.23189	-1.14468e-06	4.30989	-6.60593e-07
3.98788	-8.09674e-07	4.24189	-1.13791e-06	4.31989	-6.71793e-07
3.99788	-8.13642e-07	4.25189	-1.14404e-06	4.32989	-6.57999e-07
4.00788	-8.08759e-07	4.26189	-1.13913e-06	4.33989	-6.74204e-07
4.01788	-8.13642e-07	4.27189	-1.14453e-06	4.34989	-6.58365e-07
4.02788	-8.12726e-07	4.28189	-1.13916e-06	4.35989	-6.71457e-07
4.03788	-8.13642e-07	4.29189	-1.14428e-06	4.36989	-6.54489e-07
4.04788	-8.112e-07	4.30189	-1.13845e-06	4.37989	-6.7222e-07
4.05788	-8.16083e-07	4.31189	-1.14456e-06	4.38989	-6.53238e-07
4.06788	-8.09674e-07	4.32189	-1.13897e-06	4.39989	-6.72739e-07
4.07788	-8.16083e-07	4.33189	-1.14413e-06	4.40989	-6.56443e-07
4.08788	-8.13337e-07	4.34189	-1.13864e-06	4.41989	-6.70938e-07
4.09788	-8.1883e-07	4.35189	-1.14392e-06	4.42989	-6.55649e-07
4.10788	-8.12116e-07	4.36189	-1.13971e-06	4.43989	-6.70298e-07
4.11788	-8.15168e-07	4.37189	-1.14376e-06	4.44989	-6.54642e-07
4.12788	-8.14862e-07	4.38189	-1.13971e-06	4.45989	-6.70969e-07
4.13788	-8.16693e-07	4.39189	-1.14474e-06	4.46989	-6.56565e-07
4.14788	-8.16083e-07	4.40189	-1.13943e-06	4.47989	-6.69138e-07
4.15788	-8.14862e-07	4.41189	-1.14508e-06	4.48989	-6.55924e-07
4.16788	-8.13947e-07	4.42189	-1.14007e-06	4.49989	-6.72586e-07
4.17788	-8.20356e-07	4.43189	-1.14434e-06	4.50989	-6.54093e-07
4.18788	-8.17304e-07	4.44189	-1.13992e-06	4.51989	-6.71579e-07
4.19788	-8.16999e-07	4.45189	-1.14471e-06	4.52989	-6.5275e-07
4.20788	-8.15168e-07	4.46189	-1.13958e-06	4.53989	-6.69596e-07
4.21788	-8.21271e-07	4.47189	-1.1455e-06	4.54989	-6.5568e-07
4.22788	-8.15473e-07	4.48189	-1.1405e-06	4.55989	-6.68924e-07
4.23788	-8.15473e-07	4.49189	-1.1445e-06	4.56989	-6.54276e-07
4.24788	-8.16083e-07	4.50189	-1.14111e-06	4.57989	-6.68344e-07
4.25788	-8.22797e-07	4.51189	-1.14428e-06	4.58989	-6.5571e-07
4.26788	-8.17609e-07	4.52189	-1.14071e-06	4.59989	-6.67795e-07
4.27788	-8.19745e-07	4.53189	-1.14407e-06	4.60989	-6.54764e-07
4.28788	-8.17609e-07	4.54189	-1.14129e-06	4.61989	-6.6688e-07
4.29788	-8.20356e-07	4.55189	-1.14334e-06	4.62989	-6.51224e-07
4.30788	-8.19745e-07	4.56189	-1.14166e-06	4.63989	-6.65811e-07
4.31788	-8.24933e-07	4.57189	-1.14477e-06	4.64989	-6.54673e-07
4.32788	-8.21576e-07	4.58189	-1.14141e-06	4.65989	-6.65628e-07
4.33788	-8.22797e-07	4.59189	-1.14425e-06	4.66989	-6.54978e-07
4.34788	-8.17304e-07	4.60189	-1.14233e-06	4.67989	-6.65049e-07
4.35788	-8.19745e-07	4.61189	-1.14428e-06	4.68989	-6.5513e-07
4.36788	-8.20356e-07	4.62189	-1.14145e-06	4.69989	-6.64316e-07
4.37788	-8.24323e-07	4.63189	-1.14492e-06	4.70989	-6.52536e-07
4.38788	-8.21576e-07	4.64189	-1.14212e-06	4.71989	-6.67978e-07
4.39788	-8.21881e-07	4.65189	-1.1455e-06	4.72989	-6.55191e-07
4.40788	-8.24628e-07	4.66189	-1.14178e-06	4.73989	-6.66758e-07
4.41788	-8.21881e-07	4.67189	-1.1441e-06	4.74989	-6.50797e-07
4.42788	-8.21271e-07	4.68189	-1.14242e-06	4.75989	-6.62912e-07
4.43788	-8.20661e-07	4.69189	-1.14459e-06	4.76989	-6.53238e-07
4.44788	-8.22797e-07	4.70189	-1.14276e-06	4.77989	-6.65354e-07
4.45788	-8.22187e-07	4.71189	-1.14438e-06	4.78989	-6.51346e-07
4.46788	-8.27985e-07	4.72189	-1.14257e-06	4.79989	-6.64102e-07
4.47788	-8.22492e-07	4.73189	-1.14401e-06	4.80989	-6.54245e-07
4.48788	-8.24628e-07	4.74189	-1.14282e-06	4.81989	-6.62241e-07
4.49788	-8.27375e-07	4.75189	-1.14346e-06	4.82989	-6.53147e-07
4.50788	-8.20356e-07	4.76189	-1.14376e-06	4.83989	-6.64499e-07
4.51788	-8.21576e-07	4.77189	-1.14535e-06	4.84989	-6.50186e-07
4.52788	-8.27375e-07	4.78189	-1.14355e-06	4.85989	-6.63767e-07
4.53788	-8.25544e-07	4.79189	-1.14492e-06	4.86989	-6.53604e-07
4.54788	-8.27069e-07	4.80189	-1.14389e-06	4.87989	-6.63645e-07
4.55788	-8.22797e-07	4.81189	-1.14508e-06	4.88989	-6.50614e-07
4.56788	-8.24933e-07	4.82189	-1.14364e-06	4.89989	-6.62912e-07
4.57788	-8.2829e-07	4.83189	-1.14471e-06	4.90989	-6.48813e-07
4.58788	-8.24628e-07	4.84189	-1.14416e-06	4.91989	-6.62455e-07
4.59788	-8.24018e-07	4.85189	-1.14486e-06	4.92989	-6.52475e-07
4.60788	-8.26154e-07	4.86189	-1.14419e-06	4.93989	-6.61905e-07
4.61788	-8.24323e-07	4.87189	-1.14459e-06	4.94989	-6.51133e-07
4.62788	-8.25849e-07	4.88189	-1.14566e-06	4.95989	-6.64835e-07
4.63788	-8.27985e-07	4.89189	-1.14376e-06	4.96989	-6.52018e-07
4.64788	-8.27985e-07	4.90189	-1.14587e-06	4.97989	-6.59891e-07
4.65788	-8.26459e-07	4.91189	-1.14444e-06	4.98989	-6.49698e-07
4.66788	-8.27375e-07	4.92189	-1.14511e-06	4.99989	-6.5922e-07
4.67788	-8.29206e-07	4.93189	-1.1437e-06	5.00989	-6.48752e-07
4.68788	-8.30121e-07	4.94189	-1.14563e-06	5.01989	-6.60623e-07
4.69788	-8.27985e-07	4.95189	-1.1438e-06	5.02989	-6.48691e-07
4.70788	-8.289e-07	4.96189	-1.14514e-06	5.03989	-6.59311e-07
4.71788	-8.2768e-07	4.97189	-1.14474e-06	5.04989	-6.4924e-07
4.72788	-8.34394e-07	4.98189	-1.14499e-06	5.05989	-6.60013e-07
4.73788	-8.28595e-07	4.99189	-1.14459e-06	5.06989	-6.49393e-07
4.74788	-8.33173e-07	5.00189	-1.14529e-06	5.07989	-6.60807e-07
4.75788	-8.27375e-07	5.01189	-1.14425e-06	5.08989	-6.46372e-07
4.76788	-8.35004e-07	5.02189	-1.14605e-06	5.09989	-6.60349e-07
4.77788	-8.29511e-07	5.03189	-1.14383e-06	5.10989	-6.49485e-07
4.78788	-8.32563e-07	5.04189	-1.14517e-06	5.11989	-6.5925e-07
4.79788	-8.2768e-07	5.05189	-1.14483e-06	5.12989	-6.49546e-07
4.80788	-8.31952e-07	5.06189	-1.14645e-06	5.13989	-6.59891e-07
4.81788	-8.27375e-07	5.07189	-1.14334e-06	5.14989	-6.47531e-07
4.82788	-8.33478e-07	5.08189	-1.14645e-06	5.15989	-6.59891e-07
4.83788	-8.2768e-07	5.09189	-1.14322e-06	5.16989	-6.48996e-07
4.84788	-8.35614e-07	5.10189	-1.14642e-06	5.17989	-6.59708e-07
4.85788	-8.31037e-07	5.11189	-1.14471e-06	5.18989	-6.48996e-07
4.86788	-8.34699e-07	5.12189	-1.14572e-06	5.19989	-6.58274e-07
4.87788	-8.28595e-07	5.13189	-1.14465e-06	5.20989	-6.46738e-07
4.88788	-8.35614e-07	5.14189	-1.14566e-06	5.21989	-6.55466e-07
4.89788	-8.29816e-07	5.15189	-1.14413e-06	5.22989	-6.47135e-07
4.90788	-8.32563e-07	5.16189	-1.14578e-06	5.23989	-6.59464e-07
4.91788	-8.24018e-07	5.17189	-1.14285e-06	5.24989	-6.50064e-07
4.92788	-8.36835e-07	5.18189	-1.14611e-06	5.25989	-6.57816e-07
4.93788	-8.31037e-07	5.19189	-1.14261e-06	5.26989	-6.47776e-07
4.94788	-8.32563e-07	5.20189	-1.14669e-06	5.27989	-6.57816e-07
4.95788	-8.289e-07	5.21189	-1.14282e-06	5.28989	-6.48752e-07
4.96788	-8.37751e-07	5.22189	-1.14773e-06	5.29989	-6.54856e-07
4.97788	-8.31037e-07	5.23189	-1.14212e-06	5.30989	-6.48355e-07
4.98788	-8.33783e-07	5.24189	-1.14712e-06	5.31989	-6.58213e-07
4.99788	-8.30732e-07	5.25189	-1.14318e-06	5.32989	-6.47257e-07
5.00788	-8.3653e-07	5.26189	-1.14669e-06	5.33989	-6.55558e-07
5.01788	-8.30732e-07	5.27189	-1.14199e-06	5.34989	-6.45761e-07
5.02788	-8.38971e-07	5.28189	-1.14615e-06	5.35989	-6.55069e-07
5.03788	-8.30121e-07	5.29189	-1.14169e-06	5.36989	-6.4567e-07
5.04788	-8.38971e-07	5.30189	-1.14639e-06	5.37989	-6.57328e-07
5.05788	-8.31647e-07	5.31189	-1.14236e-06	5.38989	-6.45731e-07
5.06788	-8.36225e-07	5.32189	-1.14694e-06	5.39989	-6.56565e-07
5.07788	-8.34394e-07	5.33189	-1.14117e-06	5.40989	-6.46097e-07
5.08788	-8.39276e-07	5.34189	-1.14593e-06	5.41989	-6.55374e-07
5.09788	-8.30426e-07	5.35189	-1.14056e-06	5.42989	-6.457e-07
5.10788	-8.40192e-07	5.36189	-1.14676e-06	5.43989	-6.54337e-07
5.11788	-8.31952e-07	5.37189	-1.14016e-06	5.44989	-6.45975e-07
5.12788	-8.39887e-07	5.38189	-1.14682e-06	5.45989	-6.53818e-07
5.13788	-8.33478e-07	5.39189	-1.13931e-06	5.46989	-6.46524e-07
5.14788	-8.40802e-07	5.40189	-1.14553e-06	5.47989	-6.52353e-07
5.15788	-8.30732e-07	5.41189	-1.13971e-06	5.48989	-6.44693e-07
5.16788	-8.4477e-07	5.42189	-1.14569e-06	5.49989	-6.50461e-07
5.17788	-8.33783e-07	5.43189	-1.13968e-06	5.50989	-6.46219e-07
5.18788	-8.43854e-07	5.44189	-1.1455e-06	5.51989	-6.53086e-07
5.19788	-8.3592e-07	5.45189	-1.13964e-06	5.52989	-6.45456e-07
5.20788	-8.39887e-07	5.46189	-1.1466e-06	5.53989	-6.55252e-07
5.21788	-8.35004e-07	5.47189	-1.13845e-06	5.54989	-6.46372e-07
5.22788	-8.43549e-07	5.48189	-1.1456e-06	5.55989	-6.55497e-07
5.23788	-8.32868e-07	5.49189	-1.13903e-06	5.56989	-6.46036e-07
5.24788	-8.42633e-07	5.50189	-1.14547e-06	5.57989	-6.52597e-07
5.25788	-8.31647e-07	5.51189	-1.1391e-06	5.58989	-6.4506e-07
5.26788	-8.41413e-07	5.52189	-1.14425e-06	5.59989	-6.5391e-07
5.27788	-8.33783e-07	5.53189	-1.13855e-06	5.60989	-6.47226e-07
5.28788	-8.43244e-07	5.54189	-1.14557e-06	5.61989	-6.52353e-07
5.29788	-8.34088e-07	5.55189	-1.13882e-06	5.62989	-6.47043e-07
5.30788	-8.40497e-07	5.56189	-1.14611e-06	5.63989	-6.51346e-07
5.31788	-8.31342e-07	5.57189	-1.13739e-06	5.64989	-6.44602e-07
5.32788	-8.43244e-07	5.58189	-1.14621e-06	5.65989	-6.53757e-07
5.33788	-8.34394e-07	5.59189	-1.13723e-06	5.66989	-6.46769e-07
5.34788	-8.45075e-07	5.60189	-1.14618e-06	5.67989	-6.51834e-07
5.35788	-8.32868e-07	5.61189	-1.1365e-06	5.68989	-6.44815e-07
5.36788	-8.42633e-07	5.62189	-1.14636e-06	5.69989	-6.52506e-07
5.37788	-8.34394e-07	5.63189	-1.13672e-06	5.70989	-6.4506e-07
5.38788	-8.43549e-07	5.64189	-1.14486e-06	5.71989	-6.4924e-07
5.39788	-8.31647e-07	5.65189	-1.13656e-06	5.72989	-6.43503e-07
5.40788	-8.42328e-07	5.66189	-1.14611e-06	5.73989	-6.51194e-07
5.41788	-8.3714e-07	5.67189	-1.13751e-06	5.74989	-6.45456e-07
5.42788	-8.4599e-07	5.68189	-1.1459e-06	5.75989	-6.53482e-07
5.43788	-8.33783e-07	5.69189	-1.13745e-06	5.76989	-6.43686e-07
5.44788	-8.44464e-07	5.70189	-1.14535e-06	5.77989	-6.49912e-07
5.45788	-8.29816e-07	5.71189	-1.13711e-06	5.78989	-6.45304e-07
5.46788	-8.46906e-07	5.72189	-1.14547e-06	5.79989	-6.50858e-07
5.47788	-8.38056e-07	5.73189	-1.13672e-06	5.80989	-6.46036e-07
5.48788	-8.4599e-07	5.74189	-1.14636e-06	5.81989	-6.48539e-07
5.49788	-8.33783e-07	5.75189	-1.13607e-06	5.82989	-6.4332e-07
5.50788	-8.43244e-07	5.76189	-1.14587e-06	5.83989	-6.52262e-07
5.51788	-8.34699e-07	5.77189	-1.13726e-06	5.84989	-6.44815e-07
5.52788	-8.43244e-07	5.78189	-1.1466e-06	5.85989	-6.504e-07
5.53788	-8.35004e-07	5.79189	-1.13623e-06	5.86989	-6.43747e-07
5.54788	-8.4538e-07	5.80189	-1.14621e-06	5.87989	-6.45578e-07
5.55788	-8.34088e-07	5.81189	-1.13586e-06	5.88989	-6.44663e-07
5.56788	-8.49652e-07	5.82189	-1.14703e-06	5.89989	-6.49088e-07
5.57788	-8.35614e-07	5.83189	-1.1361e-06	5.90989	-6.45212e-07
5.58788	-8.51483e-07	5.84189	-1.14657e-06	5.91989	-6.5037e-07
5.59788	-8.3592e-07	5.85189	-1.13614e-06	5.92989	-6.44358e-07
5.60788	-8.50263e-07	5.86189	-1.14575e-06	5.93989	-6.48294e-07
5.61788	-8.3653e-07	5.87189	-1.13546e-06	5.94989	-6.43595e-07
5.62788	-8.45075e-07	5.88189	-1.14615e-06	5.95989	-6.49393e-07
5.63788	-8.38056e-07	5.89189	-1.13519e-06	5.96989	-6.46067e-07
5.64788	-8.42023e-07	5.90189	-1.14749e-06	5.97989	-6.4744e-07
5.65788	-8.38361e-07	5.91189	-1.13598e-06	5.98989	-6.44113e-07
5.66788	-8.50568e-07	5.92189	-1.14578e-06	5.99989	-6.47898e-07
5.67788	-8.38056e-07	5.93189	-1.13583e-06	6.00989	-6.45761e-07
5.68788	-8.49347e-07	5.94189	-1.14615e-06	6.01989	-6.504e-07
5.69788	-8.39582e-07	5.95189	-1.13556e-06	6.02989	-6.42893e-07
5.70788	-8.48432e-07	5.96189	-1.14657e-06	6.03989	-6.47501e-07
5.71788	-8.37445e-07	5.97189	-1.13565e-06	6.04989	-6.44663e-07
5.72788	-8.49652e-07	5.98189	-1.14618e-06	6.05989	-6.47776e-07
5.73788	-8.35614e-07	5.99189	-1.13461e-06	6.06989	-6.44327e-07
5.74788	-8.49347e-07	6.00189	-1.147e-06	6.07989	-6.45151e-07
5.75788	-8.35614e-07	6.01189	-1.13583e-06	6.08989	-6.43564e-07
5.76788	-8.50873e-07	6.02189	-1.14709e-06	6.09989	-6.46372e-07
5.77788	-8.37751e-07	6.03189	-1.1347e-06	6.10989	-6.43595e-07
5.87791	6.282e-06	6.13191	5.49671e-06	6.20995	3.8146e-06
5.97791	4.11373e-06	6.23191	3.52954e-06	6.30995	2.45077e-06
6.07791	3.13106e-06	6.33191	2.67231e-06	6.40995	1.86605e-06
6.17791	2.54879e-06	6.43191	2.18555e-06	6.50995	1.54439e-06
6.27791	2.1487e-06	6.53191	1.87366e-06	6.60995	1.34206e-06
6.37791	1.85543e-06	6.63191	1.6463e-06	6.70995	1.20351e-06
6.47791	1.62837e-06	6.73191	1.48059e-06	6.80995	1.10433e-06
6.57791	1.44557e-06	6.83191	1.35334e-06	6.90995	1.02834e-06
6.67791	1.29909e-06	6.93191	1.24713e-06	7.00995	9.67917e-07
6.77791	1.17824e-06	7.03191	1.1623e-06	7.10995	9.20309e-07
6.87791	1.07753e-06	7.13191	1.09394e-06	7.20995	8.80026e-07
6.97791	9.92694e-07	7.23191	1.03412e-06	7.30995	8.45236e-07
7.07791	9.19757e-07	7.33191	9.81937e-07	7.40995	8.12582e-07
7.17791	8.54449e-07	7.43191	9.37687e-07	7.50995	7.87558e-07
7.27791	8.01043e-07	7.53191	8.95572e-07	7.60995	7.64364e-07
7.37791	7.54046e-07	7.63191	8.61393e-07	7.70995	7.42086e-07
7.47791	7.11932e-07	7.73191	8.28739e-07	7.80995	7.21335e-07
7.57791	6.75006e-07	7.83191	8.00968e-07	7.90995	7.04855e-07
7.67791	6.42047e-07	7.93191	7.75028e-07	8.00995	6.88681e-07
7.77791	6.14276e-07	8.03191	7.50004e-07	8.10995	6.72812e-07
7.87791	5.87726e-07	8.13191	7.25895e-07	8.20995	6.59079e-07
7.97791	5.64837e-07	8.23191	7.06363e-07	8.30995	6.4443e-07
8.07791	5.44391e-07	8.33191	6.87443e-07	8.40995	6.30087e-07
8.17791	5.24249e-07	8.43191	6.69742e-07	8.50995	6.16354e-07
8.27791	5.05328e-07	8.53191	6.54178e-07	8.60995	6.05063e-07
8.37791	4.89459e-07	8.63191	6.38004e-07	8.70995	5.93466e-07
8.47791	4.76336e-07	8.73191	6.24576e-07	8.80995	5.82174e-07
8.57791	4.61993e-07	8.83191	6.12369e-07	8.90995	5.72104e-07
8.67791	4.49481e-07	8.93191	6.01078e-07	9.00995	5.63253e-07
8.77791	4.40326e-07	9.03191	5.89481e-07	9.10995	5.53488e-07
8.87791	4.29339e-07	9.13191	5.80021e-07	9.20995	5.45248e-07
8.97791	4.17132e-07	9.23191	5.71171e-07	9.30995	5.37924e-07
9.07791	4.11029e-07	9.33191	5.60489e-07	9.40995	5.29989e-07
9.17791	4.01873e-07	9.43191	5.51944e-07	9.50995	5.23275e-07
9.27791	3.94549e-07	9.53191	5.434e-07	9.60995	5.16562e-07
9.37791	3.85699e-07	9.63191	5.33024e-07	9.70995	5.08627e-07
9.47791	3.77765e-07	9.73191	5.2631e-07	9.80995	5.02218e-07
9.57791	3.71966e-07	9.83191	5.20511e-07	9.90995	4.95199e-07
9.67791	3.66778e-07	9.93191	5.11661e-07	10.0099	4.90011e-07
9.77791	3.6159e-07	10.0319	5.04337e-07	10.1099	4.83908e-07
9.87791	3.55487e-07	10.1319	4.95487e-07	10.2099	4.77499e-07
9.97791	3.51214e-07	10.2319	4.89689e-07	10.31	4.70785e-07
10.0779	3.45416e-07	10.3319	4.81754e-07	10.41	4.67123e-07
10.1779	3.40838e-07	10.4319	4.72904e-07	10.5099	4.61935e-07
10.2779	3.36261e-07	10.5319	4.6558e-07	10.6099	4.57357e-07
10.3779	3.29242e-07	10.6319	4.5795e-07	10.7099	4.5278e-07
10.4779	3.23138e-07	10.7319	4.50931e-07	10.81	4.49423e-07
10.5779	3.20697e-07	10.8319	4.46354e-07	10.91	4.44845e-07
10.6779	3.17645e-07	10.9319	4.41471e-07	11.0099	4.40573e-07
10.7779	3.12457e-07	11.0319	4.36283e-07	11.1099	4.36911e-07
10.8779	3.09405e-07	11.1319	4.29569e-07	11.2099	4.31723e-07
10.9779	3.04522e-07	11.2319	4.24076e-07	11.31	4.28976e-07
11.0779	3.01776e-07	11.3319	4.18888e-07	11.41	4.26535e-07
11.1779	2.97503e-07	11.4319	4.14615e-07	11.5099	4.24093e-07
11.2779	2.93841e-07	11.5319	4.08817e-07	11.6099	4.19821e-07
11.3779	2.90179e-07	11.6319	4.03934e-07	11.7099	4.16464e-07
11.4779	2.87738e-07	11.7319	3.99662e-07	11.81	4.11886e-07
11.5779	2.85601e-07	11.8319	3.93863e-07	11.91	4.08224e-07
11.6779	2.82855e-07	11.9319	3.8837e-07	12.0099	4.03952e-07
11.7779	2.79803e-07	12.0319	3.82877e-07	12.1099	3.99069e-07
11.8779	2.76446e-07	12.1319	3.76163e-07	12.2099	3.95712e-07
11.9779	2.74615e-07	12.2319	3.73417e-07	12.31	3.9205e-07
12.0779	2.72479e-07	12.3319	3.68839e-07	12.41	3.88998e-07
12.1779	2.68512e-07	12.4319	3.66092e-07	12.5099	3.87167e-07
12.2779	2.67596e-07	12.5319	3.60904e-07	12.6099	3.84115e-07
12.3779	2.6546e-07	12.6319	3.59073e-07	12.7099	3.832e-07
12.4779	2.62103e-07	12.7319	3.56327e-07	12.81	3.81979e-07
12.5779	2.59967e-07	12.8319	3.51444e-07	12.91	3.80758e-07
12.6779	2.57525e-07	12.9319	3.47172e-07	13.0099	3.77707e-07
12.7779	2.54779e-07	13.0319	3.44425e-07	13.1099	3.72824e-07
12.8779	2.53863e-07	13.1319	3.39237e-07	13.2099	3.69467e-07
12.9779	2.53253e-07	13.2319	3.34354e-07	13.31	3.65805e-07
13.0779	2.49896e-07	13.3319	3.30692e-07	13.41	3.63363e-07
13.1779	2.4837e-07	13.4319	3.28861e-07	13.5099	3.60006e-07
13.2779	2.46539e-07	13.5319	3.25199e-07	13.6099	3.5787e-07
13.3779	2.46234e-07	13.6319	3.22147e-07	13.7099	3.55734e-07
13.4779	2.44098e-07	13.7319	3.17569e-07	13.81	3.52377e-07
13.5779	2.41351e-07	13.8319	3.15738e-07	13.91	3.51156e-07
13.6779	2.39825e-07	13.9319	3.14213e-07	14.0099	3.48715e-07
13.7779	2.37689e-07	14.0319	3.10245e-07	14.1099	3.46884e-07
13.8779	2.37384e-07	14.1319	3.08109e-07	14.2099	3.45968e-07
13.9779	2.37079e-07	14.2319	3.05362e-07	14.31	3.43832e-07
14.0779	2.37384e-07	14.3319	3.02616e-07	14.41	3.42001e-07
14.1779	2.37079e-07	14.4319	3.02005e-07	14.5099	3.39865e-07
14.2779	2.36163e-07	14.5319	3.00174e-07	14.6099	3.37118e-07
14.3779	2.31585e-07	14.6319	2.98038e-07	14.7099	3.35287e-07
14.4779	2.30365e-07	14.7319	2.96818e-07	14.81	3.32541e-07
14.5779	2.29449e-07	14.8319	2.94986e-07	14.91	3.29184e-07
14.6779	2.28534e-07	14.9319	2.91324e-07	15.0099	3.27963e-07
14.7779	2.25787e-07	15.0319	2.89493e-07	15.1099	3.25216e-07
14.8779	2.23346e-07	15.1319	2.87662e-07	15.2099	3.23385e-07
14.9779	2.2182e-07	15.2319	2.85221e-07	15.31	3.21554e-07
15.0779	2.23651e-07	15.3319	2.83085e-07	15.41	3.19723e-07
15.1779	2.21515e-07	15.4319	2.80643e-07	15.5099	3.16977e-07
15.2779	2.21209e-07	15.5319	2.78507e-07	15.6099	3.16977e-07
15.3779	2.20599e-07	15.6319	2.78202e-07	15.7099	3.13314e-07
15.4779	2.18768e-07	15.7319	2.77897e-07	15.81	3.11789e-07
15.5779	2.19073e-07	15.8319	2.76676e-07	15.91	3.11178e-07
15.6779	2.17547e-07	15.9319	2.76981e-07	16.0099	3.09347e-07
15.7779	2.14496e-07	16.0319	2.76981e-07	16.11	3.07516e-07
15.8779	2.15716e-07	16.1319	2.76371e-07	16.2099	3.05075e-07
15.9779	2.14801e-07	16.2319	2.76066e-07	16.31	3.03549e-07
16.0779	2.13275e-07	16.3319	2.7515e-07	16.4099	3.00497e-07
16.1779	2.11749e-07	16.4319	2.7576e-07	16.5099	2.96835e-07
16.2779	2.10833e-07	16.5319	2.7454e-07	16.61	2.95004e-07
16.3779	2.09613e-07	16.6319	2.74845e-07	16.7099	2.93173e-07
16.4779	2.10223e-07	16.7319	2.75455e-07	16.81	2.92563e-07
16.5779	2.09002e-07	16.8319	2.7576e-07	16.9099	2.89206e-07
16.6779	2.05645e-07	16.9319	2.77286e-07	17.0099	2.8768e-07
16.7779	2.0473e-07	17.0319	2.78202e-07	17.11	2.86154e-07
16.8779	2.03814e-07	17.1319	2.78507e-07	17.2099	2.84323e-07
16.9779	2.01373e-07	17.2319	2.78202e-07	17.31	2.81881e-07
17.0779	1.99847e-07	17.3319	2.78812e-07	17.4099	2.81271e-07
17.1779	1.97101e-07	17.4319	2.76676e-07	17.5099	2.80356e-07
17.2779	1.95575e-07	17.5319	2.75455e-07	17.61	2.76999e-07
17.3779	1.93744e-07	17.6319	2.73929e-07	17.7099	2.76388e-07
17.4779	1.90692e-07	17.7319	2.71793e-07	17.81	2.75473e-07
17.5779	1.89471e-07	17.8319	2.70267e-07	17.9099	2.73642e-07
17.6779	1.88861e-07	17.9319	2.69962e-07	18.0099	2.70895e-07
17.7779	1.89166e-07	18.0319	2.67826e-07	18.11	2.6998e-07
17.8779	1.87945e-07	18.1319	2.65995e-07	18.2099	2.68148e-07
17.9779	1.85504e-07	18.2319	2.64774e-07	18.31	2.66317e-07
18.0779	1.83978e-07	18.3319	2.62943e-07	18.4099	2.65097e-07
18.1779	1.85199e-07	18.4319	2.60807e-07	18.5099	2.64792e-07
18.2779	1.86419e-07	18.5319	2.58976e-07	18.61	2.6235e-07
18.3779	1.85809e-07	18.6319	2.5745e-07	18.7099	2.60519e-07
18.4779	1.85504e-07	18.7319	2.56534e-07	18.81	2.58383e-07
18.5779	1.80926e-07	18.8319	2.55314e-07	18.9099	2.56552e-07
18.6779	1.79095e-07	18.9319	2.52567e-07	19.0099	2.55941e-07
18.7779	1.77874e-07	19.0319	2.51346e-07	19.11	2.52279e-07
18.8779	1.76349e-07	19.1319	2.47684e-07	19.2099	2.51364e-07
18.9779	1.76043e-07	19.2319	2.46464e-07	19.31	2.50448e-07
19.0779	1.76043e-07	19.3319	2.45853e-07	19.4099	2.48922e-07
19.1779	1.74212e-07	19.4319	2.44938e-07	19.5099	2.47702e-07
19.2779	1.73602e-07	19.5319	2.44327e-07	19.61	2.46481e-07
19.3779	1.70855e-07	19.6319	2.43717e-07	19.7099	2.45871e-07
19.4779	1.71161e-07	19.7319	2.44938e-07	19.81	2.45565e-07
19.5779	1.70855e-07	19.8319	2.43717e-07	19.9099	2.43429e-07
19.6779	1.69635e-07	19.9319	2.44632e-07	20.0099	2.42209e-07
19.7779	1.6994e-07	20.0319	2.44327e-07	20.11	2.41598e-07
19.8779	1.69635e-07	20.1319	2.42801e-07	20.2099	2.39767e-07
19.9779	1.70245e-07	20.2319	2.42496e-07	20.31	2.40072e-07
20.0779	1.7055e-07	20.3319	2.4097e-07	20.4099	2.39767e-07
20.1779	1.6994e-07	20.4319	2.38529e-07	20.5099	2.39157e-07
20.2779	1.67804e-07	20.5319	2.35477e-07	20.61	2.38546e-07
20.3779	1.65973e-07	20.6319	2.33646e-07	20.7099	2.39767e-07
20.4779	1.66583e-07	20.7319	2.309e-07	20.81	2.39157e-07
20.5779	1.65667e-07	20.8319	2.31205e-07	20.9099	2.38546e-07
20.6779	1.66278e-07	20.9319	2.28763e-07	21.0099	2.37631e-07
20.7779	1.65667e-07	21.0319	2.29374e-07	21.11	2.36715e-07
20.8779	1.63836e-07	21.1319	2.27543e-07	21.2099	2.36715e-07
20.9779	1.62616e-07	21.2319	2.26322e-07	21.31	2.35189e-07
21.0779	1.63531e-07	21.3319	2.23575e-07	21.4099	2.34274e-07
21.1779	1.63226e-07	21.4319	2.22355e-07	21.5099	2.32748e-07
21.2779	1.63531e-07	21.5319	2.20218e-07	21.61	2.33053e-07
21.3779	1.60174e-07	21.6319	2.19608e-07	21.7099	2.31833e-07
21.4779	1.60479e-07	21.7319	2.16556e-07	21.81	2.31222e-07
21.5779	1.59564e-07	21.8319	2.14115e-07	21.9099	2.30917e-07
21.6779	1.59564e-07	21.9319	2.12894e-07	22.0099	2.30612e-07
21.7779	1.58343e-07	22.0319	2.10758e-07	22.11	2.30917e-07
21.8779	1.56512e-07	22.1319	2.07706e-07	22.2099	2.31833e-07
21.9779	1.58343e-07	22.2319	2.05265e-07	22.31	2.31222e-07
22.0779	1.55902e-07	22.3319	2.04044e-07	22.4099	2.31222e-07
22.1779	1.56207e-07	22.4319	2.01603e-07	22.5099	2.29391e-07
22.2779	1.54986e-07	22.5319	2.02518e-07	22.61	2.28476e-07
22.3779	1.55902e-07	22.6319	2.00077e-07	22.7099	2.27865e-07
22.4779	1.55291e-07	22.7319	1.99772e-07	22.81	2.26339e-07
22.5779	1.55291e-07	22.8319	1.98246e-07	22.9099	2.23593e-07
22.6779	1.53766e-07	22.9319	1.97635e-07	23.0099	2.21762e-07
22.7779	1.55291e-07	23.0319	1.96415e-07	23.11	2.19626e-07
22.8779	1.55291e-07	23.1319	1.94889e-07	23.2099	2.19015e-07
22.9779	1.54071e-07	23.2319	1.93363e-07	23.31	2.17489e-07
23.0779	1.54681e-07	23.3319	1.91837e-07	23.4099	2.15658e-07
23.1779	1.51324e-07	23.4319	1.90311e-07	23.5099	2.14743e-07
23.2779	1.51324e-07	23.5319	1.90006e-07	23.61	2.14438e-07
23.3779	1.51934e-07	23.6319	1.8848e-07	23.7099	2.12912e-07
23.4779	1.51629e-07	23.7319	1.85428e-07	23.81	2.14438e-07
23.5779	1.51324e-07	23.8319	1.83597e-07	23.9099	2.14743e-07
23.6779	1.50714e-07	23.9319	1.81766e-07	24.0099	2.13217e-07
23.7779	1.48883e-07	24.0319	1.81766e-07	24.11	2.12301e-07
23.8779	1.47662e-07	24.1319	1.80851e-07	24.2099	2.0986e-07
23.9779	1.47967e-07	24.2319	1.81156e-07	24.31	2.10165e-07
24.0779	1.47967e-07	24.3319	1.80546e-07	24.4099	2.0925e-07
24.1779	1.47357e-07	24.4319	1.7963e-07	24.5099	2.08029e-07
24.2779	1.47357e-07	24.5319	1.7963e-07	24.61	2.05893e-07
24.3779	1.45831e-07	24.6319	1.77799e-07	24.7099	2.03756e-07
24.4779	1.45831e-07	24.7319	1.76578e-07	24.81	2.03146e-07
24.5779	1.44e-07	24.8319	1.75968e-07	24.9099	2.02536e-07
24.6779	1.43084e-07	24.9319	1.73526e-07	25.0099	2.00399e-07
24.7779	1.42169e-07	25.0319	1.71085e-07	25.11	1.99179e-07
24.8779	1.43084e-07	25.1319	1.69254e-07	25.2099	1.97653e-07
24.9779	1.42169e-07	25.2319	1.69559e-07	25.31	1.95211e-07
25.0779	1.42169e-07	25.3319	1.67118e-07	25.4099	1.94296e-07
25.1779	1.41864e-07	25.4319	1.66202e-07	25.5099	1.95822e-07
25.2779	1.38812e-07	25.5319	1.64066e-07	25.61	1.93991e-07
25.3779	1.39117e-07	25.6319	1.62235e-07	25.7099	1.94296e-07
25.4779	1.36676e-07	25.7319	1.61319e-07	25.81	1.91244e-07
25.5779	1.36065e-07	25.8319	1.60099e-07	25.9099	1.91549e-07
25.6779	1.36981e-07	25.9319	1.59183e-07	26.0099	1.90329e-07
25.7779	1.36676e-07	26.0319	1.57657e-07	26.11	1.88498e-07
25.8779	1.34539e-07	26.1319	1.55826e-07	26.2099	1.87277e-07
25.9779	1.34845e-07	26.2319	1.55521e-07	26.31	1.86361e-07
26.0779	1.34845e-07	26.3319	1.5369e-07	26.4099	1.8453e-07
26.1779	1.34234e-07	26.4319	1.54606e-07	26.5099	1.82394e-07
26.2779	1.33624e-07	26.5319	1.5308e-07	26.61	1.83615e-07
26.3779	1.33319e-07	26.6319	1.53385e-07	26.7099	1.8392e-07
26.4779	1.33319e-07	26.7319	1.50638e-07	26.81	1.84835e-07
26.5779	1.31793e-07	26.8319	1.50333e-07	26.9099	1.85141e-07
26.6779	1.30572e-07	26.9319	1.50638e-07	27.0099	1.85446e-07
26.7779	1.30267e-07	27.0319	1.50638e-07	27.11	1.83615e-07
26.8779	1.29962e-07	27.1319	1.49723e-07	27.2099	1.82089e-07
26.9779	1.29962e-07	27.2319	1.50028e-07	27.31	1.79037e-07
27.0779	1.29046e-07	27.3319	1.49723e-07	27.4099	1.76596e-07
27.1779	1.28131e-07	27.4319	1.49112e-07	27.5099	1.7568e-07
27.2779	1.28436e-07	27.5319	1.47587e-07	27.61	1.72934e-07
27.3779	1.2691e-07	27.6319	1.47587e-07	27.7099	1.72934e-07
27.4779	1.27215e-07	27.7319	1.47892e-07	27.81	1.71713e-07
27.5779	1.25689e-07	27.8319	1.51249e-07	27.9099	1.70797e-07
27.6779	1.24774e-07	27.9319	1.50638e-07	28.0099	1.70492e-07
27.7779	1.24163e-07	28.0319	1.52164e-07	28.11	1.70187e-07
27.8779	1.24469e-07	28.1319	1.51249e-07	28.2099	1.69577e-07
27.9779	1.22943e-07	28.2319	1.50638e-07	28.31	1.68051e-07
28.0779	1.23248e-07	28.3319	1.49418e-07	28.4099	1.65915e-07
28.1779	1.22332e-07	28.4319	1.49418e-07	28.5099	1.64694e-07
28.2779	1.20501e-07	28.5319	1.48807e-07	28.61	1.64389e-07
28.3779	1.21112e-07	28.6319	1.46976e-07	28.7099	1.67135e-07
28.4779	1.21722e-07	28.7319	1.45755e-07	28.81	1.68051e-07
28.5779	1.21417e-07	28.8319	1.46366e-07	28.9099	1.70492e-07
28.6779	1.21417e-07	28.9319	1.46366e-07	29.0099	1.72018e-07
28.7779	1.18976e-07	29.0319	1.47281e-07	29.11	1.72934e-07
28.8779	1.19586e-07	29.1319	1.49418e-07	29.2099	1.72323e-07
28.9779	1.18976e-07	29.2319	1.51554e-07	29.31	1.69577e-07
29.0779	1.19281e-07	29.3319	1.543e-07	29.4099	1.68356e-07
29.1779	1.17755e-07	29.4319	1.52164e-07	29.5099	1.6683e-07
29.2779	1.17144e-07	29.5319	1.5369e-07	29.61	1.64694e-07
29.3779	1.15008e-07	29.6319	1.51859e-07	29.7099	1.65609e-07
29.4779	1.15924e-07	29.7319	1.49112e-07	29.81	1.63473e-07
29.5779	1.14093e-07	29.8319	1.46061e-07	29.9099	1.62558e-07
29.6779	1.13482e-07	29.9319	1.43314e-07	30.0099	1.61642e-07
29.7779	1.11651e-07	30.0319	1.43009e-07	30.11	1.61642e-07
29.8779	1.12262e-07	30.1319	1.42093e-07	30.2099	1.60727e-07
29.9779	1.11346e-07	30.2319	1.41483e-07	30.31	1.60727e-07
30.0779	1.12567e-07	30.3319	1.38431e-07	30.4099	1.61642e-07
30.1779	1.12567e-07	30.4319	1.38736e-07	30.5099	1.59811e-07
30.2779	1.10736e-07	30.5319	1.37516e-07	30.61	1.5798e-07
30.3779	1.11346e-07	30.6319	1.38431e-07	30.7099	1.58285e-07
30.4779	1.10736e-07	30.7319	1.37821e-07	30.81	1.57064e-07
30.5779	1.12567e-07	30.8319	1.38126e-07	30.9099	1.57675e-07
30.6779	1.10125e-07	30.9319	1.37211e-07	31.0099	1.55539e-07
30.7779	1.10431e-07	31.0319	1.35685e-07	31.11	1.54318e-07
30.8779	1.10431e-07	31.1319	1.36295e-07	31.2099	1.54928e-07
30.9779	1.08905e-07	31.2319	1.3599e-07	31.31	1.54318e-07
31.0779	1.11041e-07	31.3319	1.34769e-07	31.4099	1.53097e-07
31.1779	1.0921e-07	31.4319	1.34159e-07	31.5099	1.51877e-07
31.2779	1.09515e-07	31.5319	1.31717e-07	31.61	1.51266e-07
31.3779	1.08905e-07	31.6319	1.30192e-07	31.7099	1.4974e-07
31.4779	1.10431e-07	31.7319	1.2775e-07	31.81	1.50045e-07
31.5779	1.0921e-07	31.8319	1.26835e-07	31.9099	1.48825e-07
31.6779	1.08905e-07	31.9319	1.25919e-07	32.01	1.4852e-07
31.7779	1.10125e-07	32.0319	1.26529e-07	32.1099	1.48214e-07
31.8779	1.10125e-07	32.1319	1.24393e-07	32.2099	1.46994e-07
31.9779	1.0982e-07	32.2319	1.25919e-07	32.31	1.46689e-07
32.0779	1.0921e-07	32.3319	1.26224e-07	32.41	1.47299e-07
32.1779	1.0982e-07	32.4319	1.26224e-07	32.51	1.46994e-07
32.2779	1.10125e-07	32.5319	1.2836e-07	32.6099	1.46689e-07
32.3779	1.09515e-07	32.6319	1.2714e-07	32.7099	1.45468e-07
32.4779	1.07379e-07	32.7319	1.27445e-07	32.81	1.44247e-07
32.5779	1.0921e-07	32.8319	1.26224e-07	32.91	1.42721e-07
32.6779	1.07989e-07	32.9319	1.24698e-07	33.01	1.43026e-07
32.7779	1.07379e-07	33.0319	1.23783e-07	33.1099	1.42111e-07
32.8779	1.08905e-07	33.1319	1.24698e-07	33.2099	1.41195e-07
32.9779	1.07989e-07	33.2319	1.23172e-07	33.31	1.4028e-07
33.0779	1.06768e-07	33.3319	1.22257e-07	33.41	1.38754e-07
33.1779	1.06463e-07	33.4319	1.22562e-07	33.51	1.38754e-07
33.2779	1.07989e-07	33.5319	1.21647e-07	33.6099	1.38449e-07
33.3779	1.06158e-07	33.6319	1.21952e-07	33.7099	1.37838e-07
33.4779	1.05548e-07	33.7319	1.21341e-07	33.81	1.38144e-07
33.5779	1.06158e-07	33.8319	1.21036e-07	33.91	1.37533e-07
33.6779	1.06158e-07	33.9319	1.20121e-07	34.01	1.35702e-07
33.7779	1.04937e-07	34.0319	1.21341e-07	34.1099	1.35092e-07
33.8779	1.03106e-07	34.1319	1.20426e-07	34.2099	1.35092e-07
33.9779	1.04327e-07	34.2319	1.21647e-07	34.31	1.34481e-07
34.0779	1.01886e-07	34.3319	1.20731e-07	34.41	1.34481e-07
34.1779	1.02801e-07	34.4319	1.21647e-07	34.51	1.33566e-07
34.2779	9.97494e-08	34.5319	1.19816e-07	34.6099	1.33261e-07
34.3779	1.02801e-07	34.6319	1.20121e-07	34.7099	1.31735e-07
34.4779	1.00055e-07	34.7319	1.21647e-07	34.81	1.30819e-07
34.5779	1.0036e-07	34.8319	1.21952e-07	34.91	1.30819e-07
34.6779	1.00665e-07	34.9319	1.22562e-07	35.01	1.30209e-07
34.7779	9.85287e-08	35.0319	1.23783e-07	35.1099	1.28988e-07
34.8779	9.88339e-08	35.1319	1.24393e-07	35.2099	1.27462e-07
34.9779	9.76132e-08	35.2319	1.22867e-07	35.31	1.26852e-07
35.0779	9.88339e-08	35.3319	1.21341e-07	35.41	1.27768e-07
35.1779	9.70029e-08	35.4319	1.20121e-07	35.51	1.26852e-07
35.2779	9.76132e-08	35.5319	1.17984e-07	35.6099	1.25937e-07
35.3779	9.76132e-08	35.6319	1.16153e-07	35.7099	1.25631e-07
35.4779	9.60873e-08	35.7319	1.15848e-07	35.81	1.24716e-07
35.5779	9.57822e-08	35.8319	1.12797e-07	35.91	1.25631e-07
35.6779	9.63925e-08	35.9319	1.11881e-07	36.01	1.24716e-07
35.7779	9.57822e-08	36.0319	1.0944e-07	36.1099	1.24411e-07
35.8779	9.48666e-08	36.1319	1.07303e-07	36.2099	1.24106e-07
35.9779	9.45614e-08	36.2319	1.06388e-07	36.31	1.24411e-07
36.0779	9.51718e-08	36.3319	1.04557e-07	36.41	1.22885e-07
36.1779	9.45614e-08	36.4319	1.04252e-07	36.51	1.24411e-07
36.2779	9.33407e-08	36.5319	1.04557e-07	36.6099	1.25021e-07
36.3779	9.33407e-08	36.6319	1.04252e-07	36.7099	1.27157e-07
36.4779	9.27304e-08	36.7319	1.03946e-07	36.81	1.28378e-07
36.5779	9.27304e-08	36.8319	1.02726e-07	36.91	1.28988e-07
36.6779	9.33407e-08	36.9319	1.02726e-07	37.01	1.25937e-07
36.7779	9.08993e-08	37.0319	1.02726e-07	37.1099	1.238e-07
36.8779	9.05942e-08	37.1319	1.02421e-07	37.2099	1.24106e-07
36.9779	9.08993e-08	37.2319	1.03031e-07	37.31	1.2258e-07
37.0779	9.05942e-08	37.3319	1.03336e-07	37.41	1.22885e-07
37.1779	9.15097e-08	37.4319	1.0181e-07	37.51	1.22274e-07
37.2779	9.18149e-08	37.5319	1.02115e-07	37.6099	1.21664e-07
37.3779	8.96786e-08	37.6319	1.02726e-07	37.7099	1.21664e-07
37.4779	8.81528e-08	37.7319	1.03336e-07	37.81	1.21969e-07
37.5779	8.93735e-08	37.8319	1.04252e-07	37.91	1.22274e-07
37.6779	8.78476e-08	37.9319	1.03641e-07	38.01	1.22885e-07
37.7779	8.78476e-08	38.0319	1.03336e-07	38.1099	1.22274e-07
37.8779	8.54062e-08	38.1319	1.03336e-07	38.2099	1.22274e-07
37.9779	8.5101e-08	38.2319	1.01505e-07	38.31	1.22274e-07
38.0779	8.41855e-08	38.3319	9.87584e-08	38.41	1.238e-07
38.1779	8.63217e-08	38.4319	9.81481e-08	38.51	1.24716e-07
38.2779	8.47958e-08	38.5319	9.81481e-08	38.6099	1.23495e-07
38.3779	8.29648e-08	38.6319	9.84532e-08	38.7099	1.2319e-07
38.4779	8.26596e-08	38.7319	9.84532e-08	38.81	1.21054e-07
38.5779	8.32699e-08	38.8319	9.75377e-08	38.91	1.18918e-07
38.6779	8.35751e-08	38.9319	9.78429e-08	39.01	1.16781e-07
38.7779	8.32699e-08	39.0319	9.72325e-08	39.1099	1.1434e-07
38.8779	8.35751e-08	39.1319	9.6317e-08	39.2099	1.1495e-07
38.9779	8.11337e-08	39.2319	9.57067e-08	39.31	1.14035e-07
39.0779	8.08285e-08	39.3319	9.6317e-08	39.41	1.14035e-07
39.1779	7.89975e-08	39.4319	9.6317e-08	39.51	1.1495e-07
39.2779	7.71664e-08	39.5319	9.66222e-08	39.6099	1.1495e-07
39.3779	7.77768e-08	39.6319	9.78429e-08	39.7099	1.1373e-07
39.4779	7.56406e-08	39.7319	9.87584e-08	39.81	1.12204e-07
39.5779	7.71664e-08	39.8319	9.90636e-08	39.91	1.10678e-07
39.6779	7.71664e-08	39.9319	9.81481e-08	40.01	1.11288e-07
39.7779	7.65561e-08	40.0319	9.9674e-08	40.1099	1.09457e-07
39.8779	7.65561e-08	40.1319	1.00589e-07	40.2099	1.09152e-07
39.9779	7.53354e-08	40.2319	1.00895e-07	40.31	1.09457e-07
40.0779	7.41147e-08	40.3319	1.02421e-07	40.41	1.08542e-07
40.1779	7.2894e-08	40.4319	1.04252e-07	40.51	1.09152e-07
40.2779	7.44198e-08	40.5319	1.05167e-07	40.6099	1.08236e-07
40.3779	7.41147e-08	40.6319	1.06388e-07	40.7099	1.07931e-07
40.4779	7.38095e-08	40.7319	1.07609e-07	40.81	1.07016e-07
40.5779	7.38095e-08	40.8319	1.09134e-07	40.91	1.0671e-07
40.6779	7.31991e-08	40.9319	1.12186e-07	41.01	1.0671e-07
40.7779	7.22836e-08	41.0319	1.13102e-07	41.1099	1.0549e-07
40.8779	7.38095e-08	41.1319	1.15238e-07	41.2099	1.05795e-07
40.9779	7.4725e-08	41.2319	1.15238e-07	41.31	1.05795e-07
41.0779	7.50302e-08	41.3319	1.17069e-07	41.41	1.0549e-07
41.1779	7.38095e-08	41.4319	1.189e-07	41.51	1.04574e-07
41.2779	7.4725e-08	41.5319	1.189e-07	41.6099	1.03659e-07
41.3779	7.16733e-08	41.6319	1.19205e-07	41.7099	1.02133e-07
41.4779	7.35043e-08	41.7319	1.1951e-07	41.81	1.02438e-07
41.5779	7.19784e-08	41.8319	1.21647e-07	41.91	1.02743e-07
41.6779	7.25888e-08	41.9319	1.20731e-07	42.01	1.01828e-07
41.7779	7.10629e-08	42.0319	1.22257e-07	42.1099	1.02133e-07
41.8779	7.01474e-08	42.1319	1.21341e-07	42.2099	1.01217e-07
41.9779	6.9537e-08	42.2319	1.21036e-07	42.31	1.00302e-07
42.0779	6.83163e-08	42.3319	1.20731e-07	42.41	9.93863e-08
42.1779	6.89267e-08	42.4319	1.19205e-07	42.51	1.00302e-07
42.2779	6.86215e-08	42.5319	1.17984e-07	42.6099	9.96914e-08
42.3779	6.80112e-08	42.6319	1.17069e-07	42.7099	9.99966e-08
42.4779	6.7706e-08	42.7319	1.16764e-07	42.81	9.93863e-08
42.5779	6.67905e-08	42.8319	1.15238e-07	42.91	9.90811e-08
42.6779	6.64853e-08	42.9319	1.12797e-07	43.01	9.90811e-08
42.7779	6.74008e-08	43.0319	1.11271e-07	43.1099	9.81656e-08
42.8779	6.67905e-08	43.1319	1.1066e-07	43.2099	9.69449e-08
42.9779	6.74008e-08	43.2319	1.08829e-07	43.31	9.66397e-08
43.0779	6.80112e-08	43.3319	1.07609e-07	43.41	9.63345e-08
43.1779	6.74008e-08	43.4319	1.07914e-07	43.51	9.60293e-08
43.2779	6.83163e-08	43.5319	1.06998e-07	43.6099	9.57242e-08
43.3779	6.74008e-08	43.6319	1.03946e-07	43.7099	9.5419e-08
43.4779	6.80112e-08	43.7319	1.03946e-07	43.81	9.60293e-08
43.5779	6.74008e-08	43.8319	1.0181e-07	43.91	9.5419e-08
43.6779	6.7706e-08	43.9319	1.00589e-07	44.01	9.78604e-08
43.7779	6.86215e-08	44.0319	9.78429e-08	44.1099	1.00912e-07
43.8779	6.70956e-08	44.1319	9.6317e-08	44.2099	1.01523e-07
43.9779	6.9537e-08	44.2319	9.6317e-08	44.31	9.96914e-08
44.0779	6.9537e-08	44.3319	9.60118e-08	44.41	9.93863e-08
44.1779	6.74008e-08	44.4319	9.41808e-08	44.51	1.01217e-07
44.2779	6.89267e-08	44.5319	9.35704e-08	44.6099	1.00302e-07
44.3779	6.7706e-08	44.6319	9.20446e-08	44.7099	1.03048e-07
44.4779	6.80112e-08	44.7319	9.20446e-08	44.81	1.05185e-07
44.5779	6.80112e-08	44.8319	9.14342e-08	44.91	1.06405e-07
44.6779	6.83163e-08	44.9319	9.08239e-08	45.01	1.07931e-07
44.7779	6.9537e-08	45.0319	9.05187e-08	45.1099	1.09762e-07
44.8779	6.89267e-08	45.1319	9.08239e-08	45.2099	1.09762e-07
44.9779	6.7706e-08	45.2319	9.02135e-08	45.31	1.10678e-07
45.0779	6.86215e-08	45.3319	8.99083e-08	45.41	1.12509e-07
45.1779	6.7706e-08	45.4319	8.99083e-08	45.51	1.1373e-07
45.2779	6.89267e-08	45.5319	8.86876e-08	45.6099	1.14035e-07
45.3779	6.67905e-08	45.6319	8.9298e-08	45.7099	1.12509e-07
45.4779	6.58749e-08	45.7319	8.83824e-08	45.81	1.10983e-07
45.5779	6.61801e-08	45.8319	8.89928e-08	45.91	1.07016e-07
45.6779	6.37387e-08	45.9319	8.86876e-08	46.01	1.03964e-07
45.7779	6.40439e-08	46.0319	8.68566e-08	46.1099	1.02133e-07
45.8779	6.19076e-08	46.1319	8.74669e-08	46.2099	1.02743e-07
45.9779	6.19076e-08	46.2319	8.77721e-08	46.31	1.00607e-07
46.0779	6.28232e-08	46.3319	8.80773e-08	46.41	9.81656e-08
46.1779	6.22128e-08	46.4319	9.02135e-08	46.51	9.81656e-08
46.2779	6.12973e-08	46.5319	9.14342e-08	46.6099	9.66397e-08
46.3779	6.12973e-08	46.6319	9.38756e-08	46.7099	9.41983e-08
46.4779	6.2518e-08	46.7319	9.54015e-08	46.81	9.45035e-08
46.5779	5.97714e-08	46.8319	9.81481e-08	46.91	9.38931e-08
46.6779	5.91611e-08	46.9319	9.69274e-08	47.01	9.38931e-08
46.7779	5.85507e-08	47.0319	9.90636e-08	47.1099	9.26724e-08
46.8779	5.76352e-08	47.1319	9.90636e-08	47.2099	9.17569e-08
46.9779	5.85507e-08	47.2319	9.90636e-08	47.31	9.14517e-08
47.0779	5.79404e-08	47.3319	9.75377e-08	47.41	9.20621e-08
47.1779	5.61093e-08	47.4319	9.60118e-08	47.51	9.11465e-08
47.2779	5.88559e-08	47.5319	9.4486e-08	47.6099	9.17569e-08
47.3779	5.76352e-08	47.6319	9.35704e-08	47.7099	9.20621e-08
47.4779	5.76352e-08	47.7319	9.23497e-08	47.81	9.23672e-08
47.5779	5.76352e-08	47.8319	9.26549e-08	47.91	9.08413e-08
47.6779	5.733e-08	47.9319	9.14342e-08	48.01	9.05362e-08
47.7779	5.733e-08	48.0319	9.05187e-08	48.1099	8.99258e-08
47.8779	5.64145e-08	48.1319	9.05187e-08	48.2099	9.0231e-08
47.9779	5.64145e-08	48.2319	8.96032e-08	48.31	9.08413e-08
48.0779	5.94662e-08	48.3319	8.77721e-08	48.41	9.0231e-08
48.1779	5.91611e-08	48.4319	8.53307e-08	48.51	9.0231e-08
48.2779	5.70248e-08	48.5319	8.31945e-08	48.6099	8.96206e-08
48.3779	5.79404e-08	48.6319	8.19738e-08	48.7099	8.93155e-08
48.4779	5.82455e-08	48.7319	8.10582e-08	48.81	8.83999e-08
48.5779	5.79404e-08	48.8319	8.01427e-08	48.91	8.77896e-08
48.6779	5.70248e-08	48.9319	7.92272e-08	49.01	8.80948e-08
48.7779	5.88559e-08	49.0319	7.80065e-08	49.1099	8.71792e-08
48.8779	5.70248e-08	49.1319	7.64806e-08	49.2099	8.71792e-08
48.9779	5.70248e-08	49.2319	7.61754e-08	49.31	8.53482e-08
49.0779	5.51938e-08	49.3319	7.55651e-08	49.41	8.53482e-08
49.1779	5.48886e-08	49.4319	7.49547e-08	49.51	8.56534e-08
49.2779	5.33627e-08	49.5319	7.58702e-08	49.6099	8.35171e-08
49.3779	5.24472e-08	49.6319	7.55651e-08	49.7099	8.41275e-08
49.4779	5.45834e-08	49.7319	7.34288e-08	49.81	8.35171e-08
49.5779	5.36679e-08	49.8319	7.52599e-08	49.91	8.35171e-08
49.6779	5.36679e-08	49.9319	7.46495e-08	50.01	8.41275e-08
49.7779	5.42782e-08	50.0319	7.58702e-08	50.1099	8.41275e-08
49.8779	5.18368e-08	50.1319	7.55651e-08	50.2099	8.47378e-08
49.9779	5.15317e-08	50.2319	7.67858e-08	50.31	8.53482e-08
50.0779	5.0311e-08	50.3319	7.73961e-08	50.41	8.62637e-08
50.1779	5.24472e-08	50.4319	7.67858e-08	50.51	8.65689e-08
50.2779	5.06161e-08	50.5319	7.67858e-08	50.6099	8.56534e-08
50.3779	4.97006e-08	50.6319	7.70909e-08	50.7099	8.68741e-08
50.4779	4.97006e-08	50.7319	7.80065e-08	50.81	8.5043e-08
50.5779	4.90903e-08	50.8319	7.67858e-08	50.91	8.47378e-08
50.6779	4.81747e-08	50.9319	7.77013e-08	51.01	8.38223e-08
50.7779	4.93954e-08	51.0319	7.77013e-08	51.1099	8.47378e-08
50.8779	4.6954e-08	51.1319	7.70909e-08	51.2099	8.41275e-08
50.9779	4.72592e-08	51.2319	7.67858e-08	51.31	8.47378e-08
51.0779	4.72592e-08	51.3319	7.70909e-08	51.41	8.53482e-08
51.1779	4.5123e-08	51.4319	7.64806e-08	51.51	8.5043e-08
51.2779	4.72592e-08	51.5319	7.61754e-08	51.6099	8.56534e-08
51.3779	4.75644e-08	51.6319	7.58702e-08	51.7099	8.5043e-08
51.4779	4.84799e-08	51.7319	7.52599e-08	51.81	8.5043e-08
51.5779	4.57333e-08	51.8319	7.52599e-08	51.91	8.5043e-08
51.6779	4.60385e-08	51.9319	7.52599e-08	52.01	8.38223e-08
51.7779	4.81747e-08	52.0319	7.3734e-08	52.1099	8.3212e-08
51.8779	4.60385e-08	52.1319	7.46495e-08	52.2099	8.3212e-08
51.9779	4.54281e-08	52.2319	7.3734e-08	52.31	8.26016e-08
52.0779	4.60385e-08	52.3319	7.34288e-08	52.41	8.29068e-08
52.1779	4.5123e-08	52.4319	7.25133e-08	52.51	8.35171e-08
52.2779	4.54281e-08	52.5319	7.34288e-08	52.6099	8.10757e-08
52.3779	4.5123e-08	52.6319	7.15978e-08	52.7099	8.26016e-08
52.4779	4.45126e-08	52.7319	7.25133e-08	52.81	8.19913e-08
52.5779	4.5123e-08	52.8319	7.28185e-08	52.91	8.13809e-08
52.6779	4.45126e-08	52.9319	7.34288e-08	53.01	8.04654e-08
52.7779	4.39023e-08	53.0319	7.25133e-08	53.1099	8.10757e-08
52.8779	4.35971e-08	53.1319	7.28185e-08	53.2099	8.07705e-08
52.9779	4.29867e-08	53.2319	7.09874e-08	53.31	8.10757e-08
53.0779	4.45126e-08	53.3319	7.15978e-08	53.41	8.22964e-08
53.1779	4.1766e-08	53.4319	7.00719e-08	53.51	8.22964e-08
53.2779	4.29867e-08	53.5319	7.09874e-08	53.6099	8.22964e-08
53.3779	4.23764e-08	53.6319	7.03771e-08	53.7099	8.3212e-08
53.4779	4.32919e-08	53.7319	6.91564e-08	53.81	8.16861e-08
53.5779	4.39023e-08	53.8319	6.82408e-08	53.91	8.38223e-08
53.6779	4.1766e-08	53.9319	6.82408e-08	54.01	8.26016e-08
53.7779	4.32919e-08	54.0319	6.73253e-08	54.1099	8.10757e-08
53.8779	4.5123e-08	54.1319	6.76305e-08	54.2099	8.16861e-08
53.9779	4.32919e-08	54.2319	6.61046e-08	54.31	7.86343e-08
54.0779	4.39023e-08	54.3319	6.54943e-08	54.41	7.64981e-08
54.1779	4.1766e-08	54.4319	6.39684e-08	54.51	7.43619e-08
54.2779	4.26816e-08	54.5319	6.45787e-08	54.6099	7.34463e-08
54.3779	4.23764e-08	54.6319	6.27477e-08	54.7099	7.2836e-08
54.4779	4.23764e-08	54.7319	6.27477e-08	54.81	7.22256e-08
54.5779	4.23764e-08	54.8319	6.27477e-08	54.91	6.97842e-08
54.6779	4.11557e-08	54.9319	6.21373e-08	55.01	6.85635e-08
54.7779	4.11557e-08	55.0319	6.12218e-08	55.1099	6.82583e-08
54.8779	4.05453e-08	55.1319	6.00011e-08	55.2099	6.82583e-08
54.9779	3.96298e-08	55.2319	5.93907e-08	55.31	6.7648e-08
55.0779	4.05453e-08	55.3319	6.00011e-08	55.41	6.70376e-08
55.1779	3.84091e-08	55.4319	5.96959e-08	55.51	6.7648e-08
55.2779	3.9935e-08	55.5319	5.87804e-08	55.6099	6.64273e-08
55.3779	3.71884e-08	55.6319	5.90856e-08	55.7099	6.64273e-08
55.4779	3.81039e-08	55.7319	5.96959e-08	55.81	6.55118e-08
55.5779	3.81039e-08	55.8319	6.00011e-08	55.91	6.42911e-08
55.6779	3.71884e-08	55.9319	5.87804e-08	56.01	6.39859e-08
55.7779	3.68832e-08	56.0319	5.90856e-08	56.1099	6.36807e-08
55.8779	3.74936e-08	56.1319	5.75597e-08	56.2099	6.42911e-08
55.9779	3.68832e-08	56.2319	5.66442e-08	56.31	6.33755e-08
56.0779	3.65781e-08	56.3319	5.6339e-08	56.41	6.39859e-08
56.1779	3.59677e-08	56.4319	5.6339e-08	56.51	6.39859e-08
56.2779	3.50522e-08	56.5319	5.57286e-08	56.6099	6.39859e-08
56.3779	3.53573e-08	56.6319	5.54235e-08	56.7099	6.36807e-08
56.4779	3.44418e-08	56.7319	5.48131e-08	56.81	6.33755e-08
56.5779	3.50522e-08	56.8319	5.38976e-08	56.91	6.45962e-08
56.6779	3.35263e-08	56.9319	5.32872e-08	57.01	6.39859e-08
56.7779	3.50522e-08	57.0319	5.35924e-08	57.1099	6.36807e-08
56.8779	3.38315e-08	57.1319	5.32872e-08	57.2099	6.36807e-08
56.9779	3.44418e-08	57.2319	5.29821e-08	57.31	6.42911e-08
57.0779	3.32211e-08	57.3319	5.17614e-08	57.41	6.49014e-08
57.1779	3.41366e-08	57.4319	5.23717e-08	57.51	6.39859e-08
57.2779	3.29159e-08	57.5319	5.17614e-08	57.6099	6.30704e-08
57.3779	3.29159e-08	57.6319	5.26769e-08	57.7099	6.36807e-08
57.4779	3.23056e-08	57.7319	5.26769e-08	57.81	6.33755e-08
57.5779	3.20004e-08	57.8319	5.32872e-08	57.91	6.33755e-08
57.6779	3.29159e-08	57.9319	5.23717e-08	58.01	6.36807e-08
57.7779	3.29159e-08	58.0319	5.29821e-08	58.1099	6.33755e-08
57.8779	3.29159e-08	58.1319	5.26769e-08	58.2099	6.21548e-08
57.9779	3.01694e-08	58.2319	5.20665e-08	58.31	6.33755e-08
58.0779	3.10849e-08	58.3319	5.29821e-08	58.41	6.246e-08
58.1779	3.16952e-08	58.4319	5.02355e-08	58.51	6.246e-08
58.2779	3.04745e-08	58.5319	5.20665e-08	58.6099	6.33755e-08
58.3779	3.35263e-08	58.6319	5.05407e-08	58.7099	6.30704e-08
58.4779	3.16952e-08	58.7319	5.05407e-08	58.81	6.27652e-08
58.5779	3.16952e-08	58.8319	4.90148e-08	58.91	6.15445e-08
58.6779	3.04745e-08	58.9319	4.90148e-08	59.01	6.18496e-08
58.7779	3.10849e-08	59.0319	4.84044e-08	59.1099	6.18496e-08
58.8779	2.9559e-08	59.1319	4.77941e-08	59.2099	6.18496e-08
58.9779	3.07797e-08	59.2319	4.71837e-08	59.31	6.09341e-08
59.0779	2.92538e-08	59.3319	4.65734e-08	59.41	5.97134e-08
59.1779	2.89487e-08	59.4319	4.53527e-08	59.51	6.06289e-08
59.2779	2.89487e-08	59.5319	4.50475e-08	59.6099	5.97134e-08
59.3779	2.9559e-08	59.6319	4.38268e-08	59.7099	6.06289e-08
59.4779	3.01694e-08	59.7319	4.35216e-08	59.81	6.00186e-08
59.5779	3.01694e-08	59.8319	4.29113e-08	59.91	6.00186e-08
59.6779	2.89487e-08	59.9319	4.23009e-08	60.01	5.97134e-08
59.7779	2.92538e-08	60.0319	4.23009e-08	60.1099	5.97134e-08
59.8779	2.89487e-08	60.1319	4.04699e-08	60.2099	5.87979e-08
59.9779	2.86435e-08	60.2319	4.0775e-08	60.31	5.91031e-08
60.0779	2.7728e-08	60.3319	3.92491e-08	60.41	5.84927e-08
60.1779	2.9559e-08	60.4319	3.98595e-08	60.51	5.94082e-08
60.2779	2.83383e-08	60.5319	3.92491e-08	60.6099	5.84927e-08
60.3779	2.83383e-08	60.6319	3.92491e-08	60.7099	5.78824e-08
60.4779	2.83383e-08	60.7319	3.86388e-08	60.81	5.78824e-08
60.5779	2.80331e-08	60.8319	3.80284e-08	60.91	5.87979e-08
60.6779	2.74228e-08	60.9319	3.65026e-08	61.01	5.84927e-08
60.7779	2.83383e-08	61.0319	3.86388e-08	61.1099	5.81875e-08
60.8779	2.80331e-08	61.1319	3.80284e-08	61.2099	5.84927e-08
60.9779	2.74228e-08	61.2319	3.95543e-08	61.31	5.87979e-08
61.0779	2.86435e-08	61.3319	3.74181e-08	61.41	5.84927e-08
61.1779	2.71176e-08	61.4319	3.77233e-08	61.51	5.84927e-08
61.2779	2.65072e-08	61.5319	3.80284e-08	61.6099	5.75772e-08
61.3779	2.62021e-08	61.6319	3.74181e-08	61.7099	5.78824e-08
61.4779	2.58969e-08	61.7319	3.77233e-08	61.81	5.75772e-08
61.5779	2.52865e-08	61.8319	3.71129e-08	61.91	5.66617e-08
61.6779	2.40658e-08	61.9319	3.65026e-08	62.01	5.60513e-08
61.7779	2.4371e-08	62.0319	3.71129e-08	62.1099	5.63565e-08
61.8779	2.58969e-08	62.1319	3.61974e-08	62.2099	5.42203e-08
61.9779	2.4371e-08	62.2319	3.65026e-08	62.31	5.60513e-08
62.0779	2.40658e-08	62.3319	3.71129e-08	62.41	5.66617e-08
62.1779	2.4371e-08	62.4319	3.74181e-08	62.51	5.63565e-08
62.2779	2.254e-08	62.5319	3.74181e-08	62.6099	5.78824e-08
62.3779	2.22348e-08	62.6319	3.71129e-08	62.7099	5.78824e-08
62.4779	2.07089e-08	62.7319	3.83336e-08	62.81	5.75772e-08
62.5779	2.13193e-08	62.8319	3.77233e-08	62.91	5.87979e-08
62.6779	1.88779e-08	62.9319	3.98595e-08	63.01	5.78824e-08
62.7779	1.82675e-08	63.0319	3.92491e-08	63.1099	5.84927e-08
62.8779	1.67416e-08	63.1319	4.01647e-08	63.2099	5.84927e-08
62.9779	1.79623e-08	63.2319	4.04699e-08	63.31	5.75772e-08
63.0779	1.7352e-08	63.3319	4.19957e-08	63.41	5.7272e-08
63.1779	1.70468e-08	63.4319	4.10802e-08	63.51	5.75772e-08
63.2779	1.64364e-08	63.5319	4.13854e-08	63.6099	5.63565e-08
63.3779	1.64364e-08	63.6319	4.16906e-08	63.7099	5.69668e-08
63.4779	1.64364e-08	63.7319	4.19957e-08	63.81	5.63565e-08
63.5779	1.67416e-08	63.8319	4.10802e-08	63.91	5.42203e-08
63.6779	1.49106e-08	63.9319	4.13854e-08	64.01	5.48306e-08
63.7779	1.70468e-08	64.0319	4.23009e-08	64.1099	5.5441e-08
63.8779	1.70468e-08	64.1319	4.16906e-08	64.21	5.5441e-08
63.9779	1.76572e-08	64.2319	4.10802e-08	64.31	5.5441e-08
64.0779	1.70468e-08	64.3319	4.04699e-08	64.4099	5.48306e-08
64.1779	1.58261e-08	64.4319	4.04699e-08	64.51	5.48306e-08
64.2779	1.58261e-08	64.5319	4.01647e-08	64.6099	5.45254e-08
64.3779	1.76572e-08	64.6319	4.0775e-08	64.71	5.45254e-08
64.4779	1.70468e-08	64.7319	4.01647e-08	64.81	5.39151e-08
64.5779	1.64364e-08	64.8319	3.8944e-08	64.9099	5.26944e-08
64.6779	1.7352e-08	64.9319	3.83336e-08	65.01	5.26944e-08
64.7779	1.70468e-08	65.0319	3.77233e-08	65.1099	5.0253e-08
64.8779	1.7352e-08	65.1319	3.58922e-08	65.21	4.84219e-08
64.9779	1.7352e-08	65.2319	3.58922e-08	65.31	4.75064e-08
65.0779	1.76572e-08	65.3319	3.46715e-08	65.4099	4.87271e-08
65.1779	1.9183e-08	65.4319	3.3756e-08	65.51	4.78116e-08
65.2779	1.79623e-08	65.5319	3.28405e-08	65.6099	4.72012e-08
65.3779	1.94882e-08	65.6319	3.25353e-08	65.71	4.6896e-08
65.4779	1.94882e-08	65.7319	3.13146e-08	65.81	4.53702e-08
65.5779	1.88779e-08	65.8319	3.10094e-08	65.9099	4.53702e-08
65.6779	2.19296e-08	65.9319	2.94835e-08	66.01	4.56753e-08
65.7779	2.19296e-08	66.0319	2.94835e-08	66.1099	4.44546e-08
65.8779	2.13193e-08	66.1319	2.82628e-08	66.21	4.38443e-08
65.9779	2.13193e-08	66.2319	2.73473e-08	66.31	4.32339e-08
66.0779	2.10141e-08	66.3319	2.76525e-08	66.4099	4.35391e-08
66.1779	2.04037e-08	66.4319	2.73473e-08	66.51	4.29288e-08
66.2779	2.22348e-08	66.5319	2.82628e-08	66.6099	4.41495e-08
66.3779	2.04037e-08	66.6319	2.67369e-08	66.71	4.32339e-08
66.4779	1.94882e-08	66.7319	2.64318e-08	66.81	4.32339e-08
66.5779	1.97934e-08	66.8319	2.58214e-08	66.9099	4.38443e-08
66.6779	1.94882e-08	66.9319	2.52111e-08	67.01	4.38443e-08
66.7779	1.88779e-08	67.0319	2.52111e-08	67.1099	4.32339e-08
66.8779	1.94882e-08	67.1319	2.61266e-08	67.21	4.38443e-08
66.9779	2.10141e-08	67.2319	2.42955e-08	67.31	4.35391e-08
67.0779	2.04037e-08	67.3319	2.36852e-08	67.4099	4.26236e-08
67.1779	1.88779e-08	67.4319	2.39904e-08	67.51	4.26236e-08
67.2779	1.88779e-08	67.5319	2.27697e-08	67.6099	4.20132e-08
67.3779	2.10141e-08	67.6319	2.30748e-08	67.71	4.01822e-08
67.4779	2.04037e-08	67.7319	2.21593e-08	67.81	3.95718e-08
67.5779	1.94882e-08	67.8319	2.12438e-08	67.9099	3.92666e-08
67.6779	2.00986e-08	67.9319	2.09386e-08	68.01	3.83511e-08
67.7779	1.82675e-08	68.0319	2.1549e-08	68.1099	3.89615e-08
67.8779	1.82675e-08	68.1319	2.03282e-08	68.21	3.77408e-08
67.9779	1.88779e-08	68.2319	2.03282e-08	68.31	3.77408e-08
68.0779	1.82675e-08	68.3319	1.88024e-08	68.4099	3.89615e-08
68.1779	1.67416e-08	68.4319	1.91075e-08	68.51	3.86563e-08
68.2779	1.82675e-08	68.5319	1.97179e-08	68.6099	3.89615e-08
68.3779	1.64364e-08	68.6319	1.94127e-08	68.71	3.80459e-08
68.4779	1.61313e-08	68.7319	1.8192e-08	68.81	3.62149e-08
68.5779	1.52157e-08	68.8319	1.88024e-08	68.9099	3.62149e-08
68.6779	1.55209e-08	68.9319	1.88024e-08	69.01	3.62149e-08
68.7779	1.36899e-08	69.0319	1.8192e-08	69.1099	3.56045e-08
68.8779	1.52157e-08	69.1319	1.84972e-08	69.21	3.43838e-08
68.9779	1.52157e-08	69.2319	1.72765e-08	69.31	3.43838e-08
69.0779	1.2164e-08	69.3319	1.8192e-08	69.4099	3.43838e-08
69.1779	1.43002e-08	69.4319	1.69713e-08	69.51	3.34683e-08
69.2779	1.27743e-08	69.5319	1.6361e-08	69.6099	3.34683e-08
69.3779	1.30795e-08	69.6319	1.75817e-08	69.71	3.37735e-08
69.4779	1.30795e-08	69.7319	1.69713e-08	69.81	3.31631e-08
69.5779	1.30795e-08	69.8319	1.72765e-08	69.9099	3.37735e-08
69.6779	1.15536e-08	69.9319	1.60558e-08	70.01	3.40787e-08
69.7779	1.15536e-08	70.0319	1.6361e-08	70.1099	3.4689e-08
69.8779	1.30795e-08	70.1319	1.54454e-08	70.21	3.37735e-08
69.9779	1.2164e-08	70.2319	1.51403e-08	70.31	3.37735e-08
70.0779	1.06381e-08	70.3319	1.48351e-08	70.4099	3.4689e-08
70.1779	1.15536e-08	70.4319	1.23937e-08	70.51	3.40787e-08
70.2779	1.18588e-08	70.5319	1.23937e-08	70.6099	3.4689e-08
70.3779	1.15536e-08	70.6319	1.33092e-08	70.71	3.34683e-08
70.4779	1.24692e-08	70.7319	1.23937e-08	70.81	3.31631e-08
70.5779	1.03329e-08	70.8319	1.20885e-08	70.9099	3.37735e-08
70.6779	1.00278e-08	70.9319	1.17833e-08	71.01	3.34683e-08
70.7779	1.15536e-08	71.0319	1.23937e-08	71.1099	3.31631e-08
70.8779	1.24692e-08	71.1319	1.3004e-08	71.21	3.37735e-08
70.9779	1.2164e-08	71.2319	1.20885e-08	71.31	3.37735e-08
71.0779	1.00278e-08	71.3319	1.26989e-08	71.4099	3.40787e-08
71.1779	1.12485e-08	71.4319	1.17833e-08	71.51	3.31631e-08
71.2779	1.15536e-08	71.5319	1.20885e-08	71.6099	3.25528e-08
71.3779	1.06381e-08	71.6319	1.23937e-08	71.71	3.28579e-08
71.4779	1.09433e-08	71.7319	1.39196e-08	71.81	3.22476e-08
71.5779	1.06381e-08	71.8319	1.57506e-08	71.9099	3.22476e-08
71.6779	1.00278e-08	71.9319	1.66661e-08	72.01	3.01114e-08
71.7779	1.03329e-08	72.0319	1.78868e-08	72.1099	3.07217e-08
71.8779	9.72258e-09	72.1319	1.8192e-08	72.21	3.07217e-08
71.9779	9.41741e-09	72.2319	1.91075e-08	72.31	3.01114e-08
72.0779	1.00278e-08	72.3319	1.8192e-08	72.4099	2.85855e-08
72.1779	1.00278e-08	72.4319	2.00231e-08	72.51	2.88907e-08
72.2779	1.03329e-08	72.5319	1.94127e-08	72.6099	2.88907e-08
72.3779	1.06381e-08	72.6319	1.97179e-08	72.71	2.767e-08
72.4779	9.41741e-09	72.7319	2.00231e-08	72.81	2.767e-08
72.5779	9.11223e-09	72.8319	1.91075e-08	72.9099	2.70596e-08
72.6779	1.06381e-08	72.9319	2.00231e-08	73.01	2.70596e-08
72.7779	7.89153e-09	73.0319	2.00231e-08	73.1099	2.46182e-08
72.8779	1.06381e-08	73.1319	2.09386e-08	73.21	2.64493e-08
72.9779	1.06381e-08	73.2319	2.09386e-08	73.31	2.55337e-08
73.0779	9.41741e-09	73.3319	2.1549e-08	73.4099	2.55337e-08
73.1779	8.1967e-09	73.4319	2.18541e-08	73.51	2.49234e-08
73.2779	9.41741e-09	73.5319	2.12438e-08	73.6099	2.52286e-08
73.3779	9.72258e-09	73.6319	2.21593e-08	73.71	2.49234e-08
73.4779	9.41741e-09	73.7319	2.27697e-08	73.81	2.4313e-08
73.5779	8.50188e-09	73.8319	2.27697e-08	73.9099	2.49234e-08
73.6779	7.58635e-09	73.9319	2.24645e-08	74.01	2.46182e-08
73.7779	7.28118e-09	74.0319	2.338e-08	74.1099	2.46182e-08
73.8779	9.11223e-09	74.1319	2.24645e-08	74.21	2.40079e-08
73.9779	9.11223e-09	74.2319	2.27697e-08	74.31	2.4313e-08
74.0779	8.80705e-09	74.3319	2.1549e-08	74.4099	2.40079e-08
74.1779	7.89153e-09	74.4319	2.09386e-08	74.51	2.40079e-08
74.2779	9.11223e-09	74.5319	2.03282e-08	74.6099	2.40079e-08
74.3779	9.11223e-09	74.6319	1.97179e-08	74.71	2.46182e-08
74.4779	8.50188e-09	74.7319	1.91075e-08	74.81	2.49234e-08
74.5779	1.12485e-08	74.8319	1.97179e-08	74.9099	2.58389e-08
74.6779	7.89153e-09	74.9319	1.78868e-08	75.01	2.70596e-08
74.7779	8.1967e-09	75.0319	1.8192e-08	75.1099	2.67544e-08
74.8779	9.41741e-09	75.1319	1.78868e-08	75.21	2.767e-08
74.9779	8.1967e-09	75.2319	1.66661e-08	75.31	2.79751e-08
75.0779	7.58635e-09	75.3319	1.66661e-08	75.4099	2.82803e-08
75.1779	7.89153e-09	75.4319	1.60558e-08	75.51	2.767e-08
75.2779	8.1967e-09	75.5319	1.57506e-08	75.6099	2.85855e-08
75.3779	6.36565e-09	75.6319	1.54454e-08	75.71	2.73648e-08
75.4779	6.976e-09	75.7319	1.6361e-08	75.81	2.73648e-08
75.5779	6.36565e-09	75.8319	1.45299e-08	75.9099	2.73648e-08
75.6779	6.06047e-09	75.9319	1.39196e-08	76.01	2.58389e-08
75.7779	6.67082e-09	76.0319	1.54454e-08	76.1099	2.52286e-08
75.8779	6.67082e-09	76.1319	1.54454e-08	76.21	2.30923e-08
75.9779	7.58635e-09	76.2319	1.54454e-08	76.31	2.27871e-08
76.0779	6.36565e-09	76.3319	1.48351e-08	76.4099	2.18716e-08
76.1779	6.67082e-09	76.4319	1.72765e-08	76.51	2.15664e-08
76.2779	6.06047e-09	76.5319	1.57506e-08	76.6099	2.27871e-08
76.3779	7.28118e-09	76.6319	1.57506e-08	76.71	2.2482e-08
76.4779	6.67082e-09	76.7319	1.42247e-08	76.81	2.21768e-08
76.5779	5.14494e-09	76.8319	1.48351e-08	76.9099	2.33975e-08
76.6779	7.28118e-09	76.9319	1.48351e-08	77.01	2.06509e-08
76.7779	6.36565e-09	77.0319	1.45299e-08	77.1099	1.94302e-08
76.8779	4.83977e-09	77.1319	1.48351e-08	77.21	1.94302e-08
76.9779	6.976e-09	77.2319	1.6361e-08	77.31	1.9125e-08
77.0779	5.14494e-09	77.3319	1.60558e-08	77.4099	2.00406e-08
77.1779	5.14494e-09	77.4319	1.72765e-08	77.51	1.94302e-08
77.2779	5.45012e-09	77.5319	1.91075e-08	77.6099	1.82095e-08
77.3779	4.53459e-09	77.6319	2.03282e-08	77.71	1.82095e-08
77.4779	5.14494e-09	77.7319	2.36852e-08	77.81	1.66836e-08
77.5779	5.7553e-09	77.8319	2.58214e-08	77.9099	1.79043e-08
77.6779	5.14494e-09	77.9319	2.79576e-08	78.01	1.66836e-08
77.7779	4.83977e-09	78.0319	3.03991e-08	78.1099	1.79043e-08
77.8779	4.53459e-09	78.1319	3.16198e-08	78.21	1.63785e-08
77.9779	4.83977e-09	78.2319	3.28405e-08	78.31	1.66836e-08
78.0779	3.61907e-09	78.3319	3.31456e-08	78.4099	1.60733e-08
78.1779	4.22942e-09	78.4319	3.49767e-08	78.51	1.63785e-08
78.2779	3.00871e-09	78.5319	3.43663e-08	78.6099	1.66836e-08
78.3779	3.61907e-09	78.6319	3.49767e-08	78.71	1.60733e-08
78.4779	1.48284e-09	78.7319	3.61974e-08	78.81	1.69888e-08
78.5779	2.09319e-09	78.8319	3.52819e-08	78.9099	1.75992e-08
78.6779	2.62132e-10	78.9319	3.5587e-08	79.01	1.7294e-08
78.7779	-3.48219e-10	79.0319	3.71129e-08	79.1099	1.75992e-08
78.8779	5.67308e-10	79.1319	3.68077e-08	79.21	1.69888e-08
78.9779	-4.30437e-11	79.2319	3.74181e-08	79.31	1.69888e-08
79.0779	-6.53395e-10	79.3319	3.74181e-08	79.4099	1.75992e-08
79.1779	-6.53395e-10	79.4319	3.80284e-08	79.51	1.63785e-08
79.2779	-6.53395e-10	79.5319	3.68077e-08	79.6099	1.69888e-08
79.3779	-6.53395e-10	79.6319	3.65026e-08	79.71	1.69888e-08
79.4779	-4.30437e-11	79.7319	3.77233e-08	79.81	1.7294e-08
79.5779	-6.53395e-10	79.8319	3.80284e-08	79.9099	1.69888e-08
79.6779	-1.26375e-09	79.9319	3.74181e-08	80.01	1.66836e-08
79.7779	-1.56892e-09	80.0319	3.74181e-08	80.1099	1.75992e-08
79.8779	-3.0948e-09	80.1319	3.77233e-08	80.21	1.7294e-08
79.9779	-4.30437e-11	80.2319	3.80284e-08	80.31	1.69888e-08
80.0779	-1.26375e-09	80.3319	3.98595e-08	80.4099	1.63785e-08
80.1779	-1.8741e-09	80.4319	4.01647e-08	80.51	1.60733e-08
80.2779	-9.58571e-10	80.5319	4.10802e-08	80.6099	1.60733e-08
80.3779	-4.62068e-09	80.6319	4.0775e-08	80.71	1.60733e-08
80.4779	-2.48445e-09	80.7319	4.16906e-08	80.81	1.42422e-08
80.5779	-2.78963e-09	80.8319	4.10802e-08	80.9099	1.45474e-08
80.6779	-9.58571e-10	80.9319	4.10802e-08	81.01	1.45474e-08
80.7779	-2.48445e-09	81.0319	4.01647e-08	81.1099	1.30215e-08
80.8779	-3.48219e-10	81.1319	3.95543e-08	81.21	1.42422e-08
80.9779	-9.58571e-10	81.2319	3.86388e-08	81.31	1.42422e-08
81.0779	-1.26375e-09	81.3319	3.74181e-08	81.4099	1.48526e-08
81.1779	-4.30437e-11	81.4319	3.71129e-08	81.51	1.45474e-08
81.2779	5.67308e-10	81.5319	3.58922e-08	81.6099	1.48526e-08
81.3779	-1.26375e-09	81.6319	3.52819e-08	81.71	1.39371e-08
81.4779	-1.8741e-09	81.7319	3.58922e-08	81.81	1.39371e-08
81.5779	-1.56892e-09	81.8319	3.49767e-08	81.9099	1.30215e-08
81.6779	-9.58571e-10	81.9319	3.3756e-08	82.01	1.30215e-08
81.7779	-6.53395e-10	82.0319	3.58922e-08	82.1099	1.2106e-08
81.8779	-3.48219e-10	82.1319	3.3756e-08	82.21	1.11905e-08
81.9779	-1.56892e-09	82.2319	3.3756e-08	82.31	1.08853e-08
82.0779	-6.53395e-10	82.3319	3.40612e-08	82.4099	1.14956e-08
82.1779	-1.26375e-09	82.4319	3.31456e-08	82.51	1.18008e-08
82.2779	-9.58571e-10	82.5319	3.13146e-08	82.6099	1.02749e-08
82.3779	-2.17927e-09	82.6319	3.19249e-08	82.71	8.74906e-09
82.4779	-4.30437e-11	82.7319	3.19249e-08	82.81	9.66459e-09
82.5779	2.62132e-10	82.8319	3.25353e-08	82.9099	9.66459e-09
82.6779	2.62132e-10	82.9319	3.13146e-08	83.01	8.13871e-09
82.7779	-1.26375e-09	83.0319	3.07042e-08	83.1099	7.52836e-09
82.8779	-2.17927e-09	83.1319	3.00939e-08	83.21	8.13871e-09
82.9779	-3.48219e-10	83.2319	2.97887e-08	83.31	7.83354e-09
83.0779	2.62132e-10	83.3319	3.03991e-08	83.4099	8.13871e-09
83.1779	8.72484e-10	83.4319	2.94835e-08	83.51	7.22318e-09
83.2779	-6.53395e-10	83.5319	3.13146e-08	83.6099	7.83354e-09
83.3779	5.67308e-10	83.6319	3.07042e-08	83.71	6.91801e-09
83.4779	-1.26375e-09	83.7319	2.94835e-08	83.81	6.61283e-09
83.5779	-4.30437e-11	83.8319	2.91783e-08	83.9099	6.30766e-09
83.6779	-1.56892e-09	83.9319	2.88732e-08	84.01	6.61283e-09
83.7779	-3.48219e-10	84.0319	2.61266e-08	84.1099	6.61283e-09
83.8779	-6.53395e-10	84.1319	2.46007e-08	84.21	6.30766e-09
83.9779	-4.30437e-11	84.2319	2.18541e-08	84.31	6.91801e-09
84.0779	-6.53395e-10	84.3319	2.1549e-08	84.4099	5.08695e-09
84.1779	5.67308e-10	84.4319	1.88024e-08	84.51	6.61283e-09
84.2779	-3.48219e-10	84.5319	1.57506e-08	84.6099	7.22318e-09
84.3779	-2.48445e-09	84.6319	1.45299e-08	84.71	7.83354e-09
84.4779	1.17766e-09	84.7319	1.36144e-08	84.81	6.91801e-09
84.5779	-1.26375e-09	84.8319	1.1173e-08	84.9099	7.22318e-09
84.6779	1.48284e-09	84.9319	9.03675e-09	85.01	6.91801e-09
84.7779	-2.17927e-09	85.0319	8.42639e-09	85.1099	8.13871e-09
84.8779	-1.26375e-09	85.1319	7.81604e-09	85.21	8.74906e-09
84.9779	-2.17927e-09	85.2319	6.59534e-09	85.31	9.05424e-09
85.0779	-1.8741e-09	85.3319	5.98499e-09	85.4099	1.14956e-08
85.1779	-1.26375e-09	85.4319	5.67981e-09	85.51	1.18008e-08
85.2779	-2.17927e-09	85.5319	5.67981e-09	85.6099	1.24112e-08
85.3779	-2.48445e-09	85.6319	4.45911e-09	85.71	1.33267e-08
85.4779	-2.78963e-09	85.7319	3.54358e-09	85.81	1.30215e-08
85.5779	-1.8741e-09	85.8319	3.54358e-09	85.9099	1.45474e-08
85.6779	-2.78963e-09	85.9319	3.54358e-09	86.01	1.48526e-08
85.7779	-3.70515e-09	86.0319	2.32288e-09	86.1099	1.60733e-08
85.8779	-2.48445e-09	86.1319	2.93323e-09	86.21	1.51578e-08
85.9779	-3.39998e-09	86.2319	2.0177e-09	86.31	1.54629e-08
86.0779	-2.48445e-09	86.3319	2.0177e-09	86.4099	1.54629e-08
86.1779	-1.56892e-09	86.4319	4.91823e-10	86.51	1.51578e-08
86.2779	-3.0948e-09	86.5319	1.40735e-09	86.6099	1.51578e-08
86.3779	-2.17927e-09	86.6319	7.96999e-10	86.71	1.57681e-08
86.4779	-2.17927e-09	86.7319	4.91823e-10	86.81	1.54629e-08
86.5779	-9.58571e-10	86.8319	-4.23704e-10	86.9099	1.48526e-08
86.6779	-2.78963e-09	86.9319	-1.33923e-09	87.01	1.48526e-08
86.7779	-6.53395e-10	87.0319	-1.03406e-09	87.1099	1.39371e-08
86.8779	-2.17927e-09	87.1319	-1.18528e-10	87.21	1.33267e-08
86.9779	-2.78963e-09	87.2319	-1.33923e-09	87.31	1.36319e-08
87.0779	-2.48445e-09	87.3319	-1.33923e-09	87.4099	1.30215e-08
87.1779	-2.48445e-09	87.4319	-2.25476e-09	87.51	1.27163e-08
87.2779	-2.78963e-09	87.5319	-2.25476e-09	87.6099	1.08853e-08
87.3779	-2.48445e-09	87.6319	-2.55993e-09	87.71	1.02749e-08
87.4779	-4.01033e-09	87.7319	-4.39099e-09	87.81	9.66459e-09
87.5779	-2.78963e-09	87.8319	-2.86511e-09	87.9099	8.13871e-09
87.6779	-2.78963e-09	87.9319	-2.55993e-09	88.01	7.22318e-09
87.7779	-2.48445e-09	88.0319	-4.08581e-09	88.1099	6.91801e-09
87.8779	-2.17927e-09	88.1319	-5.00134e-09	88.21	6.30766e-09
87.9779	-3.0948e-09	88.2319	-4.08581e-09	88.31	6.00248e-09
88.0779	-3.39998e-09	88.3319	-5.00134e-09	88.4099	6.30766e-09
88.1779	-1.26375e-09	88.4319	-5.61169e-09	88.51	5.39213e-09
88.2779	-3.39998e-09	88.5319	-4.69616e-09	88.6099	5.39213e-09
88.3779	-3.0948e-09	88.6319	-5.30652e-09	88.71	6.00248e-09
88.4779	-2.78963e-09	88.7319	-5.30652e-09	88.81	5.69731e-09
88.5779	-4.62068e-09	88.8319	-6.22204e-09	88.9099	5.08695e-09
88.6779	-3.70515e-09	88.9319	-6.52722e-09	89.01	4.78178e-09
88.7779	-4.92586e-09	89.0319	-7.13757e-09	89.1099	5.69731e-09
88.8779	-4.62068e-09	89.1319	-7.74792e-09	89.21	4.4766e-09
88.9779	-3.70515e-09	89.2319	-7.74792e-09	89.31	6.00248e-09
89.0779	-4.3155e-09	89.3319	-8.0531e-09	89.4099	5.39213e-09
89.1779	-1.56892e-09	89.4319	-8.96863e-09	89.51	6.30766e-09
89.2779	-4.01033e-09	89.5319	-9.88415e-09	89.6099	6.00248e-09
89.3779	-4.62068e-09	89.6319	-8.96863e-09	89.71	5.69731e-09
89.4779	-4.62068e-09	89.7319	-9.2738e-09	89.81	6.00248e-09
89.5779	-3.0948e-09	89.8319	-8.66345e-09	89.9099	5.08695e-09
89.6779	-4.92586e-09	89.9319	-8.0531e-09	90.01	4.78178e-09
89.7779	-4.01033e-09	90.0319	-8.66345e-09	90.1099	5.69731e-09
89.8779	-3.39998e-09	90.1319	-8.96863e-09	90.21	3.86625e-09
89.9779	-2.78963e-09	90.2319	-7.13757e-09	90.31	4.17143e-09
90.0779	-3.39998e-09	90.3319	-6.52722e-09	90.4099	4.17143e-09
90.1779	-4.01033e-09	90.4319	-5.91687e-09	90.51	4.17143e-09
90.2779	-3.0948e-09	90.5319	-5.91687e-09	90.6099	2.34037e-09
90.3779	-5.23103e-09	90.6319	-7.13757e-09	90.71	3.2559e-09
90.4779	-3.0948e-09	90.7319	-7.74792e-09	90.81	1.73002e-09
90.5779	-3.70515e-09	90.8319	-8.0531e-09	90.9099	1.73002e-09
90.6779	-4.92586e-09	90.9319	-9.2738e-09	91.01	2.64555e-09
90.7779	-4.3155e-09	91.0319	-1.07997e-08	91.1099	8.14493e-10
90.8779	-6.45174e-09	91.1319	-1.04945e-08	91.21	1.11967e-09
90.9779	-4.62068e-09	91.2319	-1.29359e-08	91.31	8.14493e-10
91.0779	-3.70515e-09	91.3319	-1.26307e-08	91.4099	1.11967e-09
91.1779	-5.84138e-09	91.4319	-1.41566e-08	91.51	-1.01034e-10
91.2779	-4.01033e-09	91.5319	-1.35463e-08	91.6099	1.42484e-09
91.3779	-2.48445e-09	91.6319	-1.26307e-08	91.71	5.09317e-10
91.4779	-4.3155e-09	91.7319	-1.29359e-08	91.81	2.04141e-10
91.5779	-3.39998e-09	91.8319	-1.23256e-08	91.9099	-1.01034e-10
91.6779	-4.01033e-09	91.9319	-1.20204e-08	92.01	-1.01034e-10
91.7779	-2.78963e-09	92.0319	-1.11049e-08	92.1099	8.14493e-10
[truncated: 1,140 more rows]

## Sheet: Figure 4 (f)
	Curent (A)
[truncated: 2,500 more rows]
