# Supplementary material for: In-depth chiral sensing capability of C-dots in a biomimetic protein-based hydrogel: a probe for chiral recognition applications
Source: Royal Society of Chemistry journal article supplement (doi:10.1039/d5bm01508a), 2026-01-01
Supplement: d5bm01508a1.zip [file Figure 5.xlsx]

## Sheet: Figure 5 (b)
-0.99762	-0.00984	-0.99762	-0.00946	-0.99762	-0.00968
-0.99518	-0.00788	-0.99518	-0.00704	-0.99518	-0.00749
-0.99274	-0.00678	-0.99274	-0.00547	-0.99274	-0.00603
-0.9903	-0.006	-0.9903	-0.00443	-0.9903	-0.00501
-0.98785	-0.0054	-0.98785	-0.00362	-0.98785	-0.00423
-0.98541	-0.00491	-0.98541	-0.003	-0.98541	-0.00351
-0.98297	-0.00451	-0.98297	-0.00254	-0.98297	-0.00296
-0.98053	-0.00416	-0.98053	-0.0022	-0.98053	-0.00253
-0.97809	-0.00386	-0.97809	-0.00191	-0.97809	-0.00216
-0.97565	-0.00359	-0.97565	-0.00172	-0.97565	-0.0019
-0.97321	-0.00335	-0.97321	-0.0016	-0.97321	-0.00172
-0.97076	-0.00313	-0.97076	-0.0015	-0.97076	-0.00158
-0.96832	-0.00294	-0.96832	-0.00141	-0.96832	-0.00148
-0.96588	-0.00277	-0.96588	-0.00134	-0.96588	-0.0014
-0.96344	-0.00262	-0.96344	-0.00128	-0.96344	-0.00133
-0.961	-0.00249	-0.961	-0.00123	-0.961	-0.00127
-0.95856	-0.00236	-0.95856	-0.00118	-0.95856	-0.00122
-0.95612	-0.00222	-0.95612	-0.00114	-0.95612	-0.00117
-0.95367	-0.00207	-0.95367	-0.00111	-0.95367	-0.00113
-0.95123	-0.00189	-0.95123	-0.00107	-0.95123	-0.00109
-0.94879	-0.0017	-0.94879	-0.00104	-0.94879	-0.00106
-0.94635	-0.00151	-0.94635	-0.00102	-0.94635	-0.00103
-0.94391	-0.00132	-0.94391	-0.000991211	-0.94391	-0.001
-0.94147	-0.00116	-0.94147	-0.000967407	-0.94147	-0.000978394
-0.93903	-0.00102	-0.93903	-0.000945129	-0.93903	-0.00095459
-0.93658	-0.000922546	-0.93658	-0.000924072	-0.93658	-0.000932007
-0.93414	-0.000856323	-0.93414	-0.000904541	-0.93414	-0.000911255
-0.9317	-0.000803833	-0.9317	-0.000885925	-0.9317	-0.000891724
-0.92926	-0.000757751	-0.92926	-0.00086853	-0.92926	-0.000873413
-0.92682	-0.00071991	-0.92682	-0.000851746	-0.92682	-0.000855713
-0.92438	-0.000691833	-0.92438	-0.000835876	-0.92438	-0.000839233
-0.92194	-0.000668945	-0.92194	-0.000820618	-0.92194	-0.000823669
-0.91949	-0.000649719	-0.91949	-0.000806274	-0.91949	-0.000808716
-0.91705	-0.000632935	-0.91705	-0.000792236	-0.91705	-0.000794067
-0.91461	-0.000618591	-0.91461	-0.000778809	-0.91461	-0.00078064
-0.91217	-0.000605469	-0.91217	-0.000765686	-0.91217	-0.000767212
-0.90973	-0.000593872	-0.90973	-0.000753174	-0.90973	-0.0007547
-0.90729	-0.000582886	-0.90729	-0.000740662	-0.90729	-0.000742493
-0.90485	-0.000573425	-0.90485	-0.000729065	-0.90485	-0.000730896
-0.9024	-0.000564575	-0.9024	-0.000717773	-0.9024	-0.000719299
-0.89996	-0.000556641	-0.89996	-0.000706787	-0.89996	-0.000708313
-0.89752	-0.000549011	-0.89752	-0.000696411	-0.89752	-0.000697937
-0.89508	-0.000542297	-0.89508	-0.000686035	-0.89508	-0.000687561
-0.89264	-0.000535583	-0.89264	-0.000675964	-0.89264	-0.00067749
-0.8902	-0.00052948	-0.8902	-0.000666199	-0.8902	-0.000667725
-0.88776	-0.000523376	-0.88776	-0.000656433	-0.88776	-0.000657959
-0.88531	-0.000517883	-0.88531	-0.000647278	-0.88531	-0.000648804
-0.88287	-0.000512085	-0.88287	-0.000638123	-0.88287	-0.000639648
-0.88043	-0.000506897	-0.88043	-0.000629272	-0.88043	-0.000631104
-0.87799	-0.000501404	-0.87799	-0.000620728	-0.87799	-0.000622253
-0.87555	-0.00049646	-0.87555	-0.000612488	-0.87555	-0.000614014
-0.87311	-0.000491028	-0.87311	-0.000604248	-0.87311	-0.000605774
-0.87067	-0.000485565	-0.87067	-0.000596313	-0.87067	-0.000597534
-0.86823	-0.00047998	-0.86823	-0.000588379	-0.86823	-0.0005896
-0.86578	-0.000474518	-0.86578	-0.00058075	-0.86578	-0.000582275
-0.86334	-0.000468414	-0.86334	-0.00057312	-0.86334	-0.000574646
-0.8609	-0.00046286	-0.8609	-0.000565796	-0.8609	-0.000567322
-0.85846	-0.000457214	-0.85846	-0.000558472	-0.85846	-0.000559998
-0.85602	-0.00045163	-0.85602	-0.000551758	-0.85602	-0.000552979
-0.85358	-0.000445953	-0.85358	-0.000545044	-0.85358	-0.000545959
-0.85114	-0.000440277	-0.85114	-0.000538025	-0.85114	-0.000539246
-0.84869	-0.000434509	-0.84869	-0.000531006	-0.84869	-0.000532227
-0.84625	-0.000428894	-0.84625	-0.000524597	-0.84625	-0.000525818
-0.84381	-0.000423126	-0.84381	-0.000517883	-0.84381	-0.000519409
-0.84137	-0.000417511	-0.84137	-0.000512085	-0.84137	-0.000513
-0.83893	-0.000411835	-0.83893	-0.000505676	-0.83893	-0.000506592
-0.83649	-0.00040625	-0.83649	-0.000499573	-0.83649	-0.000500488
-0.83405	-0.000400696	-0.83405	-0.000493835	-0.83405	-0.000494659
-0.8316	-0.000395142	-0.8316	-0.000487793	-0.8316	-0.000488586
-0.82916	-0.000389587	-0.82916	-0.00048175	-0.82916	-0.000482452
-0.82672	-0.000384216	-0.82672	-0.000475891	-0.82672	-0.000476563
-0.82428	-0.000378784	-0.82428	-0.000469635	-0.82428	-0.000470795
-0.82184	-0.000373596	-0.82184	-0.00046402	-0.82184	-0.000464905
-0.8194	-0.000368378	-0.8194	-0.000458374	-0.8194	-0.000459167
-0.81696	-0.000363281	-0.81696	-0.00045285	-0.81696	-0.000453583
-0.81451	-0.000358215	-0.81451	-0.000447266	-0.81451	-0.000448029
-0.81207	-0.000353241	-0.81207	-0.000441772	-0.81207	-0.000442535
-0.80963	-0.000348267	-0.80963	-0.000436279	-0.80963	-0.000436981
-0.80719	-0.000343475	-0.80719	-0.000431	-0.80719	-0.000431671
-0.80475	-0.000338623	-0.80475	-0.00042569	-0.80475	-0.00042627
-0.80231	-0.000334045	-0.80231	-0.000420532	-0.80231	-0.000421051
-0.79987	-0.000329407	-0.79987	-0.000415436	-0.79987	-0.000416016
-0.79742	-0.000324982	-0.79742	-0.000410461	-0.79742	-0.000411011
-0.79498	-0.000320526	-0.79498	-0.000405334	-0.79498	-0.000405884
-0.79254	-0.000316223	-0.79254	-0.000400238	-0.79254	-0.000400818
-0.7901	-0.00031189	-0.7901	-0.000395111	-0.7901	-0.00039566
-0.78766	-0.000307739	-0.78766	-0.000390228	-0.78766	-0.000390656
-0.78522	-0.000303589	-0.78522	-0.000385254	-0.78522	-0.000385559
-0.78278	-0.00029953	-0.78278	-0.000380646	-0.78278	-0.000380646
-0.78033	-0.000295563	-0.78033	-0.000375885	-0.78033	-0.000375671
-0.77789	-0.000291626	-0.77789	-0.000371002	-0.77789	-0.00037088
-0.77545	-0.000287781	-0.77545	-0.00036615	-0.77545	-0.000366211
-0.77301	-0.000283936	-0.77301	-0.000361359	-0.77301	-0.00036145
-0.77057	-0.00028009	-0.77057	-0.000356506	-0.77057	-0.000356689
-0.76813	-0.000276428	-0.76813	-0.000351929	-0.76813	-0.000351929
-0.76569	-0.000272736	-0.76569	-0.000347168	-0.76569	-0.000347137
-0.76324	-0.000269226	-0.76324	-0.000342529	-0.76324	-0.000342773
-0.7608	-0.000265656	-0.7608	-0.00033786	-0.7608	-0.000338074
-0.75836	-0.000262207	-0.75836	-0.000333374	-0.75836	-0.000333649
-0.75592	-0.000258789	-0.75592	-0.000328827	-0.75592	-0.000329163
-0.75348	-0.000255432	-0.75348	-0.000324341	-0.75348	-0.000324646
-0.75104	-0.000252045	-0.75104	-0.000319855	-0.75104	-0.000320251
-0.7486	-0.00024881	-0.7486	-0.000315491	-0.7486	-0.000315918
-0.74615	-0.000245514	-0.74615	-0.000311035	-0.74615	-0.000311554
-0.74371	-0.000242371	-0.74371	-0.000306793	-0.74371	-0.000307312
-0.74127	-0.000239197	-0.74127	-0.000302429	-0.74127	-0.00030304
-0.73883	-0.000236145	-0.73883	-0.000298248	-0.73883	-0.000298828
-0.73639	-0.000233063	-0.73639	-0.000294098	-0.73639	-0.000294678
-0.73395	-0.000230164	-0.73395	-0.000290192	-0.73395	-0.000290497
-0.73151	-0.000227173	-0.73151	-0.000286041	-0.73151	-0.000286346
-0.72906	-0.000224335	-0.72906	-0.000282166	-0.72906	-0.000282318
-0.72662	-0.000221436	-0.72662	-0.000278046	-0.72662	-0.000278229
-0.72418	-0.000218658	-0.72418	-0.000274139	-0.72418	-0.000274353
-0.72174	-0.000215851	-0.72174	-0.000270142	-0.72174	-0.000270447
-0.7193	-0.000213196	-0.7193	-0.000266327	-0.7193	-0.000266693
-0.71686	-0.000210541	-0.71686	-0.000262451	-0.71686	-0.000262878
-0.71442	-0.000207947	-0.71442	-0.000258667	-0.71442	-0.000259094
-0.71198	-0.000205322	-0.71198	-0.000254883	-0.71198	-0.00025531
-0.70953	-0.00020285	-0.70953	-0.000251251	-0.70953	-0.00025174
-0.70709	-0.000200348	-0.70709	-0.000247498	-0.70709	-0.000248108
-0.70465	-0.000197998	-0.70465	-0.000243958	-0.70465	-0.000244629
-0.70221	-0.000195618	-0.70221	-0.000240387	-0.70221	-0.000241455
-0.69977	-0.000193359	-0.69977	-0.000236908	-0.69977	-0.000238098
-0.69733	-0.000191071	-0.69733	-0.000233459	-0.69733	-0.000234772
-0.69489	-0.000188843	-0.69489	-0.000230072	-0.69489	-0.000231415
-0.69244	-0.000186646	-0.69244	-0.000226654	-0.69244	-0.000228027
-0.69	-0.00018454	-0.69	-0.00022348	-0.69	-0.00022525
-0.68756	-0.000182404	-0.68756	-0.000220184	-0.68756	-0.000222015
-0.68512	-0.000180389	-0.68512	-0.000217102	-0.68512	-0.000218964
-0.68268	-0.000178375	-0.68268	-0.000213959	-0.68268	-0.00021582
-0.68024	-0.000176483	-0.68024	-0.000210968	-0.68024	-0.000212799
-0.6778	-0.000174561	-0.6778	-0.000208008	-0.6778	-0.000209869
-0.67535	-0.000172699	-0.67535	-0.0002052	-0.67535	-0.00020694
-0.67291	-0.000170898	-0.67291	-0.000202576	-0.67291	-0.00020401
-0.67047	-0.000169159	-0.67047	-0.00019986	-0.67047	-0.000201263
-0.66803	-0.000167419	-0.66803	-0.000197052	-0.66803	-0.000198456
-0.66559	-0.000165771	-0.66559	-0.000194458	-0.66559	-0.000195801
-0.66315	-0.000164124	-0.66315	-0.000191833	-0.66315	-0.000193146
-0.66071	-0.000162598	-0.66071	-0.00018927	-0.66071	-0.000190613
-0.65826	-0.000161041	-0.65826	-0.000186768	-0.65826	-0.000188141
-0.65582	-0.000159576	-0.65582	-0.000184296	-0.65582	-0.000185669
-0.65338	-0.000158051	-0.65338	-0.000181854	-0.65338	-0.000183167
-0.65094	-0.000156677	-0.65094	-0.000179565	-0.65094	-0.000180847
-0.6485	-0.000155212	-0.6485	-0.000177216	-0.6485	-0.000178467
-0.64606	-0.0001539	-0.64606	-0.000175049	-0.64606	-0.000176239
-0.64362	-0.000152527	-0.64362	-0.000172821	-0.64362	-0.00017395
-0.64117	-0.000151245	-0.64117	-0.000170776	-0.64117	-0.000171783
-0.63873	-0.000149963	-0.63873	-0.000168732	-0.63873	-0.000169678
-0.63629	-0.000148743	-0.63629	-0.000166687	-0.63629	-0.000167572
-0.63385	-0.000147522	-0.63385	-0.000164673	-0.63385	-0.000165466
-0.63141	-0.000146332	-0.63141	-0.000162842	-0.63141	-0.000163574
-0.62897	-0.000145172	-0.62897	-0.000160919	-0.62897	-0.00016156
-0.62653	-0.000144073	-0.62653	-0.000159088	-0.62653	-0.000159729
-0.62408	-0.000143005	-0.62408	-0.000157318	-0.62408	-0.000157928
-0.62164	-0.000141907	-0.62164	-0.000155609	-0.62164	-0.000156158
-0.6192	-0.000140869	-0.6192	-0.000153931	-0.6192	-0.000154449
-0.61676	-0.000139862	-0.61676	-0.000152283	-0.61676	-0.00015274
-0.61432	-0.000138855	-0.61432	-0.000150635	-0.61432	-0.000151062
-0.61188	-0.000137939	-0.61188	-0.00014917	-0.61188	-0.000149536
-0.60944	-0.000136963	-0.60944	-0.000147644	-0.60944	-0.000147949
-0.60699	-0.000136047	-0.60699	-0.00014624	-0.60699	-0.000146515
-0.60455	-0.000135132	-0.60455	-0.000144745	-0.60455	-0.000144989
-0.60211	-0.000134247	-0.60211	-0.000143341	-0.60211	-0.000143616
-0.59967	-0.000133392	-0.59967	-0.000141968	-0.59967	-0.000142212
-0.59723	-0.000132538	-0.59723	-0.000140625	-0.59723	-0.000140839
-0.59479	-0.000131714	-0.59479	-0.000139282	-0.59479	-0.000139496
-0.59235	-0.00013092	-0.59235	-0.000138123	-0.59235	-0.000138275
-0.5899	-0.000130096	-0.5899	-0.000136841	-0.5899	-0.000136993
-0.58746	-0.000129364	-0.58746	-0.000135712	-0.58746	-0.000135834
-0.58502	-0.000128571	-0.58502	-0.000134552	-0.58502	-0.000134644
-0.58258	-0.000127838	-0.58258	-0.000133484	-0.58258	-0.000133514
-0.58014	-0.000127106	-0.58014	-0.000132385	-0.58014	-0.000132416
-0.5777	-0.000126343	-0.5777	-0.000131348	-0.5777	-0.000131317
-0.57526	-0.00012561	-0.57526	-0.00013028	-0.57526	-0.000130219
-0.57281	-0.000124939	-0.57281	-0.000129303	-0.57281	-0.000129272
-0.57037	-0.000124207	-0.57037	-0.000128296	-0.57037	-0.000128204
-0.56793	-0.000123566	-0.56793	-0.000127411	-0.56793	-0.000127289
-0.56549	-0.000122864	-0.56549	-0.000126434	-0.56549	-0.000126282
-0.56305	-0.000122223	-0.56305	-0.00012558	-0.56305	-0.000125397
-0.56061	-0.000121582	-0.56061	-0.000124725	-0.56061	-0.000124481
-0.55817	-0.000120941	-0.55817	-0.000123871	-0.55817	-0.000123566
-0.55573	-0.0001203	-0.55573	-0.000122986	-0.55573	-0.00012265
-0.55328	-0.00011969	-0.55328	-0.000122192	-0.55328	-0.000121826
-0.55084	-0.00011908	-0.55084	-0.000121338	-0.55084	-0.000120941
-0.5484	-0.0001185	-0.5484	-0.000120605	-0.5484	-0.000120178
-0.54596	-0.000117859	-0.54596	-0.000119751	-0.54596	-0.000119324
-0.54352	-0.00011731	-0.54352	-0.000119049	-0.54352	-0.000118561
-0.54108	-0.00011673	-0.54108	-0.000118286	-0.54108	-0.000117828
-0.53864	-0.00011615	-0.53864	-0.000117554	-0.53864	-0.000117096
-0.53619	-0.00011557	-0.53619	-0.000116821	-0.53619	-0.000116333
-0.53375	-0.000115021	-0.53375	-0.00011618	-0.53375	-0.000115692
-0.53131	-0.000114441	-0.53131	-0.000115448	-0.53131	-0.000114899
-0.52887	-0.000113922	-0.52887	-0.000114807	-0.52887	-0.000114227
-0.52643	-0.000113312	-0.52643	-0.000114105	-0.52643	-0.000113464
-0.52399	-0.000112793	-0.52399	-0.000113495	-0.52399	-0.000112823
-0.52155	-0.000112213	-0.52155	-0.000112885	-0.52155	-0.000112152
-0.5191	-0.000111664	-0.5191	-0.000112274	-0.5191	-0.000111481
-0.51666	-0.000111115	-0.51666	-0.000111633	-0.51666	-0.000110779
-0.51422	-0.000110626	-0.51422	-0.000111053	-0.51422	-0.000110168
-0.51178	-0.000110046	-0.51178	-0.000110382	-0.51178	-0.000109497
-0.50934	-0.000109558	-0.50934	-0.000109802	-0.50934	-0.000108948
-0.5069	-0.000109039	-0.5069	-0.000109192	-0.5069	-0.000108276
-0.50446	-0.000108521	-0.50446	-0.000108582	-0.50446	-0.000107697
-0.50201	-0.000108032	-0.50201	-0.000107971	-0.50201	-0.000107086
-0.49957	-0.000107513	-0.49957	-0.000107391	-0.49957	-0.000106476
-0.49713	-0.000106964	-0.49713	-0.000106781	-0.49713	-0.000105804
-0.49469	-0.000106506	-0.49469	-0.000106262	-0.49469	-0.000105255
-0.49225	-0.000105988	-0.49225	-0.000105621	-0.49225	-0.000104614
-0.48981	-0.000105499	-0.48981	-0.000105072	-0.48981	-0.000104034
-0.48737	-0.00010495	-0.48737	-0.000104462	-0.48737	-0.000103424
-0.48492	-0.000104462	-0.48492	-0.000103943	-0.48492	-0.000102905
-0.48248	-0.000103973	-0.48248	-0.000103363	-0.48248	-0.000102325
-0.48004	-0.000103485	-0.48004	-0.000102783	-0.48004	-0.000101715
-0.4776	-0.000102936	-0.4776	-0.000102173	-0.4776	-0.000101135
-0.47516	-0.000102478	-0.47516	-0.000101685	-0.47516	-0.000100586
-0.47272	-0.000101929	-0.47272	-0.000101105	-0.47272	-9.99756e-05
-0.47028	-0.00010144	-0.47028	-0.000100586	-0.47028	-9.94568e-05
-0.46783	-0.000100952	-0.46783	-0.000100006	-0.46783	-9.8877e-05
-0.46539	-0.000100464	-0.46539	-9.94873e-05	-0.46539	-9.83276e-05
-0.46295	-9.99756e-05	-0.46295	-9.8938e-05	-0.46295	-9.77173e-05
-0.46051	-9.94873e-05	-0.46051	-9.83582e-05	-0.46051	-9.7168e-05
-0.45807	-9.8999e-05	-0.45807	-9.77783e-05	-0.45807	-9.65576e-05
-0.45563	-9.85413e-05	-0.45563	-9.72595e-05	-0.45563	-9.60388e-05
-0.45319	-9.80225e-05	-0.45319	-9.66492e-05	-0.45319	-9.54285e-05
-0.45074	-9.75647e-05	-0.45074	-9.61609e-05	-0.45074	-9.49097e-05
-0.4483	-9.70459e-05	-0.4483	-9.55811e-05	-0.4483	-9.42688e-05
-0.44586	-9.65881e-05	-0.44586	-9.50623e-05	-0.44586	-9.375e-05
-0.44342	-9.60999e-05	-0.44342	-9.45129e-05	-0.44342	-9.31396e-05
-0.44098	-9.56116e-05	-0.44098	-9.39331e-05	-0.44098	-9.25903e-05
-0.43854	-9.50928e-05	-0.43854	-9.33533e-05	-0.43854	-9.198e-05
-0.4361	-9.4635e-05	-0.4361	-9.28345e-05	-0.4361	-9.14612e-05
-0.43365	-9.41162e-05	-0.43365	-9.22241e-05	-0.43365	-9.08508e-05
-0.43121	-9.36279e-05	-0.43121	-9.17358e-05	-0.43121	-9.0332e-05
-0.42877	-9.31396e-05	-0.42877	-9.1156e-05	-0.42877	-8.97217e-05
-0.42633	-9.26514e-05	-0.42633	-9.06067e-05	-0.42633	-8.91418e-05
-0.42389	-9.21631e-05	-0.42389	-9.00574e-05	-0.42389	-8.8562e-05
-0.42145	-9.16748e-05	-0.42145	-8.94775e-05	-0.42145	-8.79822e-05
-0.41901	-9.1156e-05	-0.41901	-8.88672e-05	-0.41901	-8.73718e-05
-0.41656	-9.06982e-05	-0.41656	-8.83484e-05	-0.41656	-8.6853e-05
-0.41412	-9.01794e-05	-0.41412	-8.77075e-05	-0.41412	-8.62122e-05
-0.41168	-8.97217e-05	-0.41168	-8.71887e-05	-0.41168	-8.56628e-05
-0.40924	-8.92029e-05	-0.40924	-8.65479e-05	-0.40924	-8.50525e-05
-0.4068	-8.87451e-05	-0.4068	-8.60291e-05	-0.4068	-8.45032e-05
-0.40436	-8.82263e-05	-0.40436	-8.54492e-05	-0.40436	-8.38928e-05
-0.40192	-8.7738e-05	-0.40192	-8.48389e-05	-0.40192	-8.32825e-05
-0.39948	-8.72192e-05	-0.39948	-8.42285e-05	-0.39948	-8.26416e-05
-0.39703	-8.67615e-05	-0.39703	-8.36792e-05	-0.39703	-8.20923e-05
-0.39459	-8.62122e-05	-0.39459	-8.30688e-05	-0.39459	-8.14209e-05
-0.39215	-8.57544e-05	-0.39215	-8.25195e-05	-0.39215	-8.08716e-05
-0.38971	-8.52356e-05	-0.38971	-8.18787e-05	-0.38971	-8.02307e-05
-0.38727	-8.47168e-05	-0.38727	-8.13293e-05	-0.38727	-7.96204e-05
-0.38483	-8.4198e-05	-0.38483	-8.0719e-05	-0.38483	-7.901e-05
-0.38239	-8.36792e-05	-0.38239	-8.01086e-05	-0.38239	-7.83997e-05
-0.37994	-8.31604e-05	-0.37994	-7.94678e-05	-0.37994	-7.77283e-05
-0.3775	-8.26721e-05	-0.3775	-7.88879e-05	-0.3775	-7.71484e-05
-0.37506	-8.21228e-05	-0.37506	-7.82471e-05	-0.37506	-7.64771e-05
-0.37262	-8.16345e-05	-0.37262	-7.76978e-05	-0.37262	-7.58972e-05
-0.37018	-8.10852e-05	-0.37018	-7.70264e-05	-0.37018	-7.51953e-05
-0.36774	-8.05969e-05	-0.36774	-7.64465e-05	-0.36774	-7.46155e-05
-0.3653	-8.00476e-05	-0.3653	-7.58057e-05	-0.3653	-7.39441e-05
-0.36285	-7.95288e-05	-0.36285	-7.51648e-05	-0.36285	-7.33032e-05
-0.36041	-7.89795e-05	-0.36041	-7.44934e-05	-0.36041	-7.26013e-05
-0.35797	-7.84607e-05	-0.35797	-7.38831e-05	-0.35797	-7.1991e-05
-0.35553	-7.79114e-05	-0.35553	-7.32117e-05	-0.35553	-7.12585e-05
-0.35309	-7.73926e-05	-0.35309	-7.26013e-05	-0.35309	-7.06482e-05
-0.35065	-7.68738e-05	-0.35065	-7.18994e-05	-0.35065	-6.99768e-05
-0.34821	-7.63245e-05	-0.34821	-7.12891e-05	-0.34821	-6.93054e-05
-0.34576	-7.57751e-05	-0.34576	-7.06177e-05	-0.34576	-6.86035e-05
-0.34332	-7.52258e-05	-0.34332	-6.99768e-05	-0.34332	-6.79321e-05
-0.34088	-7.4646e-05	-0.34088	-6.92749e-05	-0.34088	-6.71997e-05
-0.33844	-7.41272e-05	-0.33844	-6.86646e-05	-0.33844	-6.65588e-05
-0.336	-7.35474e-05	-0.336	-6.79016e-05	-0.336	-6.58264e-05
-0.33356	-7.2998e-05	-0.33356	-6.72913e-05	-0.33356	-6.51855e-05
-0.33112	-7.24182e-05	-0.33112	-6.65588e-05	-0.33112	-6.44226e-05
-0.32867	-7.18994e-05	-0.32867	-6.58875e-05	-0.32867	-6.37817e-05
-0.32623	-7.13196e-05	-0.32623	-6.51855e-05	-0.32623	-6.30493e-05
-0.32379	-7.07703e-05	-0.32379	-6.44836e-05	-0.32379	-6.23474e-05
-0.32135	-7.01904e-05	-0.32135	-6.37512e-05	-0.32135	-6.15845e-05
-0.31891	-6.96716e-05	-0.31891	-6.30798e-05	-0.31891	-6.09131e-05
-0.31647	-6.90613e-05	-0.31647	-6.23169e-05	-0.31647	-6.01196e-05
-0.31403	-6.8512e-05	-0.31403	-6.16455e-05	-0.31403	-5.94177e-05
-0.31158	-6.79016e-05	-0.31158	-6.08826e-05	-0.31158	-5.86548e-05
-0.30914	-6.73523e-05	-0.30914	-6.02112e-05	-0.30914	-5.79529e-05
-0.3067	-6.67725e-05	-0.3067	-5.94788e-05	-0.3067	-5.71899e-05
-0.30426	-6.61926e-05	-0.30426	-5.87463e-05	-0.30426	-5.6427e-05
-0.30182	-6.55518e-05	-0.30182	-5.79529e-05	-0.30182	-5.56335e-05
-0.29938	-6.50024e-05	-0.29938	-5.7251e-05	-0.29938	-5.49316e-05
-0.29694	-6.43616e-05	-0.29694	-5.6488e-05	-0.29694	-5.41077e-05
-0.29449	-6.38123e-05	-0.29449	-5.57861e-05	-0.29449	-5.34058e-05
-0.29205	-6.32019e-05	-0.29205	-5.49927e-05	-0.29205	-5.25818e-05
-0.28961	-6.26221e-05	-0.28961	-5.42908e-05	-0.28961	-5.18494e-05
-0.28717	-6.20117e-05	-0.28717	-5.35278e-05	-0.28717	-5.10559e-05
-0.28473	-6.14014e-05	-0.28473	-5.27344e-05	-0.28473	-5.02625e-05
-0.28229	-6.07605e-05	-0.28229	-5.19409e-05	-0.28229	-4.94385e-05
-0.27985	-6.01807e-05	-0.27985	-5.12085e-05	-0.27985	-4.87274e-05
-0.2774	-5.95093e-05	-0.2774	-5.03845e-05	-0.2774	-4.78729e-05
-0.27496	-5.89294e-05	-0.27496	-4.96521e-05	-0.27496	-4.71222e-05
-0.27252	-5.82886e-05	-0.27252	-4.89197e-05	-0.27252	-4.63104e-05
-0.27008	-5.76477e-05	-0.27008	-4.81415e-05	-0.27008	-4.53125e-05
-0.26764	-5.70068e-05	-0.26764	-4.73358e-05	-0.26764	-4.44977e-05
-0.2652	-5.63354e-05	-0.2652	-4.65363e-05	-0.2652	-4.36707e-05
-0.26276	-5.56641e-05	-0.26276	-4.54956e-05	-0.26276	-4.27917e-05
-0.26031	-5.50232e-05	-0.26031	-4.47449e-05	-0.26031	-4.20135e-05
-0.25787	-5.43518e-05	-0.25787	-4.38934e-05	-0.25787	-4.11346e-05
-0.25543	-5.37109e-05	-0.25543	-4.31366e-05	-0.25543	-4.03473e-05
-0.25299	-5.3009e-05	-0.25299	-4.2276e-05	-0.25299	-3.94653e-05
-0.25055	-5.23376e-05	-0.25055	-4.1507e-05	-0.25055	-3.86719e-05
-0.24811	-5.16357e-05	-0.24811	-4.06799e-05	-0.24811	-3.78265e-05
-0.24567	-5.09033e-05	-0.24567	-3.98468e-05	-0.24567	-3.69781e-05
-0.24323	-5.01404e-05	-0.24323	-3.89832e-05	-0.24323	-3.6087e-05
-0.24078	-4.9469e-05	-0.24078	-3.8205e-05	-0.24078	-3.52844e-05
-0.23834	-4.87183e-05	-0.23834	-3.7323e-05	-0.23834	-3.43811e-05
-0.2359	-4.80194e-05	-0.2359	-3.65387e-05	-0.2359	-3.35724e-05
-0.23346	-4.72473e-05	-0.23346	-3.56995e-05	-0.23346	-3.27087e-05
-0.23102	-4.64966e-05	-0.23102	-3.48846e-05	-0.23102	-3.18634e-05
-0.22858	-4.55109e-05	-0.22858	-3.40424e-05	-0.22858	-3.09906e-05
-0.22614	-4.47235e-05	-0.22614	-3.32001e-05	-0.22614	-3.0127e-05
-0.22369	-4.38873e-05	-0.22369	-3.2309e-05	-0.22369	-2.92053e-05
-0.22125	-4.31183e-05	-0.22125	-3.15155e-05	-0.22125	-2.83966e-05
-0.21881	-4.22577e-05	-0.21881	-3.06213e-05	-0.21881	-2.74719e-05
-0.21637	-4.14764e-05	-0.21637	-2.98279e-05	-0.21637	-2.66541e-05
-0.21393	-4.05914e-05	-0.21393	-2.89398e-05	-0.21393	-2.57416e-05
-0.21149	-3.97766e-05	-0.21149	-2.81403e-05	-0.21149	-2.49115e-05
-0.20905	-3.89099e-05	-0.20905	-2.72888e-05	-0.20905	-2.40417e-05
-0.2066	-3.8028e-05	-0.2066	-2.64343e-05	-0.2066	-2.31659e-05
-0.20416	-3.7088e-05	-0.20416	-2.55432e-05	-0.20416	-2.22534e-05
-0.20172	-3.62213e-05	-0.20172	-2.47437e-05	-0.20172	-2.14264e-05
-0.19928	-3.52631e-05	-0.19928	-2.38495e-05	-0.19928	-2.0517e-05
-0.19684	-3.43842e-05	-0.19684	-2.30438e-05	-0.19684	-1.9696e-05
-0.1944	-3.34198e-05	-0.1944	-2.21649e-05	-0.1944	-1.8808e-05
-0.19196	-3.2489e-05	-0.19196	-2.13348e-05	-0.19196	-1.79749e-05
-0.18951	-3.15155e-05	-0.18951	-2.04742e-05	-0.18951	-1.71051e-05
-0.18707	-3.0542e-05	-0.18707	-1.96136e-05	-0.18707	-1.62476e-05
-0.18463	-2.95166e-05	-0.18463	-1.87103e-05	-0.18463	-1.53534e-05
-0.18219	-2.85675e-05	-0.18219	-1.79047e-05	-0.18219	-1.45416e-05
-0.17975	-2.75055e-05	-0.17975	-1.69922e-05	-0.17975	-1.36444e-05
-0.17731	-2.65381e-05	-0.17731	-1.61682e-05	-0.17731	-1.2854e-05
-0.17487	-2.547e-05	-0.17487	-1.52588e-05	-0.17487	-1.1969e-05
-0.17242	-2.4472e-05	-0.17242	-1.4444e-05	-0.17242	-1.11847e-05
-0.16998	-2.34344e-05	-0.16998	-1.35773e-05	-0.16998	-1.03516e-05
-0.16754	-2.23877e-05	-0.16754	-1.27106e-05	-0.16754	-9.52759e-06
-0.1651	-2.12982e-05	-0.1651	-1.17981e-05	-0.1651	-8.6853e-06
-0.16266	-2.02881e-05	-0.16266	-1.09863e-05	-0.16266	-7.92542e-06
-0.16022	-1.91986e-05	-0.16022	-1.00952e-05	-0.16022	-7.09534e-06
-0.15778	-1.81915e-05	-0.15778	-9.2926e-06	-0.15778	-6.35681e-06
-0.15533	-1.71265e-05	-0.15533	-8.44116e-06	-0.15533	-5.57556e-06
-0.15289	-1.61041e-05	-0.15289	-7.62024e-06	-0.15289	-4.84009e-06
-0.15045	-1.50482e-05	-0.15045	-6.79932e-06	-0.15045	-4.09241e-06
-0.14801	-1.40198e-05	-0.14801	-5.98755e-06	-0.14801	-3.34503e-06
-0.14557	-1.29547e-05	-0.14557	-5.14221e-06	-0.14557	-2.55371e-06
-0.14313	-1.19812e-05	-0.14313	-4.40094e-06	-0.14313	-1.84448e-06
-0.14069	-1.09406e-05	-0.14069	-3.57056e-06	-0.14069	-1.02997e-06
-0.13824	-9.99146e-06	-0.13824	-2.82501e-06	-0.13824	-2.84119e-07
-0.1358	-8.97827e-06	-0.1358	-1.99066e-06	-0.1358	5.74951e-07
-0.13336	-8.0658e-06	-0.13336	-1.23169e-06	-0.13336	1.3736e-06
-0.13092	-7.14417e-06	-0.13092	-3.92761e-07	-0.13092	2.26166e-06
-0.12848	-6.22864e-06	-0.12848	4.67834e-07	-0.12848	3.18756e-06
-0.12604	-5.32227e-06	-0.12604	1.3974e-06	-0.12604	4.19067e-06
-0.1236	-4.49799e-06	-0.1236	2.28424e-06	-0.1236	5.12299e-06
-0.12115	-3.6203e-06	-0.12115	3.30322e-06	-0.12115	6.18622e-06
-0.11871	-2.83478e-06	-0.11871	4.26697e-06	-0.11871	7.16858e-06
-0.11627	-1.99768e-06	-0.11627	5.36072e-06	-0.11627	8.26721e-06
-0.11383	-1.19263e-06	-0.11383	6.4032e-06	-0.11383	9.30481e-06
-0.11139	-3.58276e-07	-0.11139	7.51343e-06	-0.11139	1.03912e-05
-0.10895	4.98657e-07	-0.10895	8.62122e-06	-0.10895	1.14838e-05
-0.10651	1.42487e-06	-0.10651	9.8114e-06	-0.10651	1.26465e-05
-0.10406	2.32544e-06	-0.10406	1.08887e-05	-0.10406	1.37207e-05
-0.10162	3.34991e-06	-0.10162	1.21094e-05	-0.10162	1.49353e-05
-0.09918	4.35211e-06	-0.09918	1.32416e-05	-0.09918	1.60553e-05
-0.09674	5.48645e-06	-0.09674	1.44928e-05	-0.09674	1.73187e-05
-0.0943	6.55548e-06	-0.0943	1.56708e-05	-0.0943	1.85028e-05
-0.09186	7.7301e-06	-0.09186	1.69342e-05	-0.09186	1.97845e-05
-0.08942	8.92639e-06	-0.08942	1.82404e-05	-0.08942	2.1106e-05
-0.08698	1.01898e-05	-0.08698	1.96198e-05	-0.08698	2.25128e-05
-0.08453	1.1377e-05	-0.08453	2.09259e-05	-0.08453	2.38403e-05
-0.08209	1.26923e-05	-0.08209	2.23969e-05	-0.08209	2.53387e-05
-0.07965	1.39374e-05	-0.07965	2.37915e-05	-0.07965	2.67395e-05
-0.07721	1.52863e-05	-0.07721	2.53052e-05	-0.07721	2.82684e-05
-0.07477	1.66443e-05	-0.07477	2.68311e-05	-0.07477	2.97943e-05
-0.07233	1.80817e-05	-0.07233	2.84241e-05	-0.07233	3.13995e-05
-0.06989	1.95618e-05	-0.06989	3.00781e-05	-0.06989	3.30566e-05
-0.06744	2.11731e-05	-0.06744	3.1842e-05	-0.06744	3.48114e-05
-0.065	2.27417e-05	-0.065	3.35175e-05	-0.065	3.6496e-05
-0.06256	2.45178e-05	-0.06256	3.54004e-05	-0.06256	3.83789e-05
-0.06012	2.62421e-05	-0.06012	3.71948e-05	-0.06012	4.01642e-05
-0.05768	2.81921e-05	-0.05768	3.91937e-05	-0.05768	4.21661e-05
-0.05524	3.01117e-05	-0.05524	4.11102e-05	-0.05524	4.40491e-05
-0.0528	3.22083e-05	-0.0528	4.31702e-05	-0.0528	4.61182e-05
-0.05035	3.44086e-05	-0.05035	4.53156e-05	-0.05035	4.8233e-05
-0.04791	3.67828e-05	-0.04791	4.76318e-05	-0.04791	5.05005e-05
-0.04547	3.91479e-05	-0.04547	4.98474e-05	-0.04547	5.26611e-05
-0.04303	4.17847e-05	-0.04303	5.23285e-05	-0.04303	5.50903e-05
-0.04059	4.43909e-05	-0.04059	5.4715e-05	-0.04059	5.74249e-05
-0.03815	4.72656e-05	-0.03815	5.73364e-05	-0.03815	5.99457e-05
-0.03571	5.01953e-05	-0.03571	5.99548e-05	-0.03571	6.24878e-05
-0.03326	5.33295e-05	-0.03326	6.2735e-05	-0.03326	6.5033e-05
-0.03082	5.66254e-05	-0.03082	6.54907e-05	-0.03082	6.78101e-05
-0.02838	6.01837e-05	-0.02838	6.8573e-05	-0.02838	7.07703e-05
-0.02594	6.35986e-05	-0.02594	7.15332e-05	-0.02594	7.36084e-05
-0.0235	6.75354e-05	-0.0235	7.48596e-05	-0.0235	7.67822e-05
-0.02106	7.14417e-05	-0.02106	7.80945e-05	-0.02106	7.9834e-05
-0.01862	7.57446e-05	-0.01862	8.16345e-05	-0.01862	8.32214e-05
-0.01617	8.00476e-05	-0.01617	8.5144e-05	-0.01617	8.64868e-05
-0.01373	8.46863e-05	-0.01373	8.88367e-05	-0.01373	8.99658e-05
-0.01129	8.95386e-05	-0.01129	9.27124e-05	-0.01129	9.36279e-05
-0.00885	9.47876e-05	-0.00885	9.68323e-05	-0.00885	9.75037e-05
-0.00641	0.000100006	-0.00641	0.00010083	-0.00641	0.000101257
-0.00397	0.000105713	-0.00397	0.000105225	-0.00397	0.000105347
-0.00153	0.000111389	-0.00153	0.000109467	-0.00153	0.000109375
0.000915527	0.000117584	0.000915527	0.000114136	0.000915527	0.00011377
0.00336	0.000123871	0.00336	0.000118744	0.00336	0.000118103
0.0058	0.000130463	0.0058	0.000123596	0.0058	0.000122681
0.00824	0.000137329	0.00824	0.000128571	0.00824	0.00012738
0.01068	0.000144592	0.01068	0.00013382	0.01068	0.000132385
0.01312	0.000151794	0.01312	0.000138916	0.01312	0.000137207
0.01556	0.000159607	0.01556	0.00014447	0.01556	0.000142517
0.01801	0.000167236	0.01801	0.000149811	0.01801	0.000147644
0.02045	0.000175476	0.02045	0.000155609	0.02045	0.000153229
0.02289	0.000183533	0.02289	0.000161255	0.02289	0.000158661
0.02533	0.000191986	0.02533	0.000167114	0.02533	0.000164368
0.02777	0.000200623	0.02777	0.000173187	0.02777	0.000170258
0.03021	0.000209656	0.03021	0.000179504	0.03021	0.000176453
0.03265	0.000218414	0.03265	0.000185638	0.03265	0.000182434
0.0351	0.000227692	0.0351	0.000192291	0.0351	0.000188934
0.03754	0.000236725	0.03754	0.000198669	0.03754	0.00019519
0.03998	0.000246063	0.03998	0.000205353	0.03998	0.000201752
0.04242	0.000255463	0.04242	0.000212128	0.04242	0.000208344
0.04486	0.000265045	0.04486	0.000219147	0.04486	0.00021524
0.0473	0.000274719	0.0473	0.000226288	0.0473	0.00022229
0.04974	0.00028479	0.04974	0.000233795	0.04974	0.000229675
0.05219	0.000294434	0.05219	0.000240967	0.05219	0.000236816
0.05463	0.000304626	0.05463	0.000248749	0.05463	0.000244507
0.05707	0.000314392	0.05707	0.000256195	0.05707	0.000251923
0.05951	0.000324768	0.05951	0.000264221	0.05951	0.000259918
0.06195	0.000334686	0.06195	0.000271942	0.06195	0.000267609
0.06439	0.00034494	0.06439	0.000279999	0.06439	0.000275757
0.06683	0.000355225	0.06683	0.000288208	0.06683	0.000283997
0.06927	0.000365875	0.06927	0.000296783	0.06927	0.000292603
0.07172	0.000376007	0.07172	0.000305023	0.07172	0.000300873
0.07416	0.000386719	0.07416	0.000313843	0.07416	0.000309784
0.0766	0.000396881	0.0766	0.000322205	0.0766	0.000318298
0.07904	0.000407745	0.07904	0.000331268	0.07904	0.000327515
0.08148	0.000418152	0.08148	0.000339935	0.08148	0.000336426
0.08392	0.000428711	0.08392	0.000348877	0.08392	0.000345612
0.08636	0.000439362	0.08636	0.000357819	0.08636	0.000354919
0.08881	0.000450348	0.08881	0.000367126	0.08881	0.000364594
0.09125	0.000460754	0.09125	0.000375916	0.09125	0.00037381
0.09369	0.000471863	0.09369	0.000385345	0.09369	0.000383698
0.09613	0.000482391	0.09613	0.000394287	0.09613	0.000393127
0.09857	0.000493591	0.09857	0.000403778	0.09857	0.000403198
0.10101	0.000504242	0.10101	0.000412781	0.10101	0.000412842
0.10345	0.000515228	0.10345	0.000422211	0.10345	0.000422852
0.1059	0.000526306	0.1059	0.000431519	0.1059	0.000432983
0.10834	0.000537781	0.10834	0.000441162	0.10834	0.000443481
0.11078	0.000548584	0.11078	0.000450165	0.11078	0.0004534
0.11322	0.000560181	0.11322	0.000459808	0.11322	0.000463989
0.11566	0.000571106	0.11566	0.000468842	0.11566	0.000473999
0.1181	0.000582489	0.1181	0.000478271	0.1181	0.000484528
0.12054	0.000593658	0.12054	0.000487366	0.12054	0.000494812
0.12299	0.000605011	0.12299	0.000496643	0.12299	0.00050531
0.12543	0.00061676	0.12543	0.000505859	0.12543	0.000515839
0.12787	0.000628357	0.12787	0.00051535	0.12787	0.000526703
0.13031	0.000639343	0.13031	0.000524139	0.13031	0.000536957
0.13275	0.000651245	0.13275	0.0005336	0.13275	0.000547852
0.13519	0.000662231	0.13519	0.000542358	0.13519	0.000558136
0.13763	0.000674133	0.13763	0.000551697	0.13763	0.000569092
0.14008	0.000685425	0.14008	0.000560333	0.14008	0.000579315
0.14252	0.000697021	0.14252	0.000569336	0.14252	0.000589935
0.14496	0.000708313	0.14496	0.000578156	0.14496	0.000600555
0.1474	0.000720215	0.1474	0.00058725	0.1474	0.000611572
0.14984	0.000731506	0.14984	0.000595551	0.14984	0.000621643
0.15228	0.000743713	0.15228	0.00060437	0.15228	0.000632324
0.15472	0.000755005	0.15472	0.000612488	0.15472	0.000642395
0.15717	0.000766907	0.15717	0.000620728	0.15717	0.000652466
0.15961	0.000778809	0.15961	0.000628052	0.15961	0.000662537
0.16205	0.00079071	0.16205	0.000635376	0.16205	0.000672302
0.16449	0.000802917	0.16449	0.000642395	0.16449	0.000681763
0.16693	0.000815735	0.16693	0.000649414	0.16693	0.000691223
0.16937	0.000827637	0.16937	0.000655212	0.16937	0.000699768
0.17181	0.000840759	0.17181	0.000661011	0.17181	0.000708313
0.17426	0.000853271	0.17426	0.000666199	0.17426	0.000715637
0.1767	0.000866394	0.1767	0.000671387	0.1767	0.000722961
0.17914	0.000879517	0.17914	0.00067627	0.17914	0.000729065
0.18158	0.000892944	0.18158	0.000681152	0.18158	0.000734863
0.18402	0.000906677	0.18402	0.000686646	0.18402	0.000740051
0.18646	0.000921021	0.18646	0.000692749	0.18646	0.000745239
0.1889	0.000934753	0.1889	0.000699158	0.1889	0.000749512
0.19135	0.000949097	0.19135	0.000707397	0.19135	0.0007547
0.19379	0.000963135	0.19379	0.000715942	0.19379	0.000759583
0.19623	0.000977478	0.19623	0.000726318	0.19623	0.000765686
0.19867	0.000991211	0.19867	0.000737305	0.19867	0.0007724
0.20111	0.001	0.20111	0.000749817	0.20111	0.00078064
0.20355	0.00102	0.20355	0.000762939	0.20355	0.000790405
0.20599	0.00103	0.20599	0.000777283	0.20599	0.000801697
0.20844	0.00104	0.20844	0.000791626	0.20844	0.000813293
0.21088	0.00105	0.21088	0.00080719	0.21088	0.000827026
0.21332	0.00106	0.21332	0.000822449	0.21332	0.000841064
0.21576	0.00107	0.21576	0.000838928	0.21576	0.000856323
0.2182	0.00107	0.2182	0.000855103	0.2182	0.000871582
0.22064	0.00107	0.22064	0.000871277	0.22064	0.000887756
0.22308	0.00108	0.22308	0.000888062	0.22308	0.000903931
0.22552	0.00108	0.22552	0.000904846	0.22552	0.000920105
0.22797	0.00107	0.22797	0.00092041	0.22797	0.000935669
0.23041	0.00107	0.23041	0.000935974	0.23041	0.000950928
0.23285	0.00107	0.23285	0.000949707	0.23285	0.00096405
0.23529	0.00106	0.23529	0.000962219	0.23529	0.000976868
0.23773	0.00106	0.23773	0.0009729	0.23773	0.000987854
0.24017	0.00105	0.24017	0.000982056	0.24017	0.00099762
0.24261	0.00105	0.24261	0.000989075	0.24261	0.00101
0.24506	0.00105	0.24506	0.000993652	0.24506	0.00101
0.2475	0.00104	0.2475	0.000994263	0.2475	0.00102
0.24994	0.00104	0.24994	0.000991516	0.24994	0.00102
0.25238	0.00104	0.25238	0.000982361	0.25238	0.00102
0.25482	0.00103	0.25482	0.000968018	0.25482	0.00101
0.25726	0.00102	0.25726	0.000947266	0.25726	0.000999451
0.2597	0.00102	0.2597	0.000921021	0.2597	0.000982361
0.26215	0.00101	0.26215	0.000891724	0.26215	0.000958557
0.26459	0.00099762	0.26459	0.000859985	0.26459	0.00092926
0.26703	0.000985413	0.26703	0.000826111	0.26703	0.000895996
0.26947	0.000972595	0.26947	0.000794373	0.26947	0.000862732
0.27191	0.000959473	0.27191	0.000765991	0.27191	0.000829468
0.27435	0.000947571	0.27435	0.000741577	0.27435	0.000798035
0.27679	0.000936279	0.27679	0.000720215	0.27679	0.000768433
0.27924	0.000926514	0.27924	0.000700989	0.27924	0.000742493
0.28168	0.000917358	0.28168	0.000682678	0.28168	0.00072052
0.28412	0.000907898	0.28412	0.000664673	0.28412	0.000701294
0.28656	0.000897827	0.28656	0.000645447	0.28656	0.000683289
0.289	0.000887146	0.289	0.00062561	0.289	0.000665588
0.29144	0.000874939	0.29144	0.000604248	0.29144	0.000647888
0.29388	0.000862122	0.29388	0.00058197	0.29388	0.000629578
0.29633	0.000847168	0.29633	0.000558777	0.29633	0.000610657
0.29877	0.000831604	0.29877	0.000535583	0.29877	0.00059082
0.30121	0.000815735	0.30121	0.000513	0.30121	0.000570068
0.30365	0.000799561	0.30365	0.000492859	0.30365	0.000550537
0.30609	0.000783081	0.30609	0.000474335	0.30609	0.000531921
0.30853	0.000765991	0.30853	0.000457886	0.30853	0.000514832
0.31097	0.000748291	0.31097	0.000443359	0.31097	0.000498657
0.31342	0.000730591	0.31342	0.000430664	0.31342	0.000483917
0.31586	0.000713196	0.31586	0.000418488	0.31586	0.000470001
0.3183	0.000696716	0.3183	0.000407593	0.3183	0.000457245
0.32074	0.000680542	0.32074	0.000397217	0.32074	0.000445404
0.32318	0.000664368	0.32318	0.000387482	0.32318	0.000433838
0.32562	0.000647583	0.32562	0.000378082	0.32562	0.00042334
0.32806	0.000630188	0.32806	0.000369263	0.32806	0.000413605
0.33051	0.000611572	0.33051	0.000360718	0.33051	0.000404083
0.33295	0.000592041	0.33295	0.000352631	0.33295	0.000395142
0.33539	0.000570984	0.33539	0.000344818	0.33539	0.000386475
0.33783	0.000549011	0.33783	0.000337372	0.33783	0.000378204
0.34027	0.000526428	0.34027	0.000330292	0.34027	0.000370209
0.34271	0.00050293	0.34271	0.000323547	0.34271	0.000362579
0.34515	0.000479065	0.34515	0.000317017	0.34515	0.000355103
0.3476	0.000455597	0.3476	0.000310822	0.3476	0.000347992
0.35004	0.000434509	0.35004	0.000304901	0.35004	0.000341003
0.35248	0.000416656	0.35248	0.000299133	0.35248	0.000334442
0.35492	0.000401337	0.35492	0.000293701	0.35492	0.000328156
0.35736	0.000387482	0.35736	0.000288513	0.35736	0.000322021
0.3598	0.000375305	0.3598	0.000283508	0.3598	0.000316193
0.36224	0.000364319	0.36224	0.000278717	0.36224	0.000310608
0.36469	0.000354126	0.36469	0.000274048	0.36469	0.000305115
0.36713	0.000344879	0.36713	0.000269684	0.36713	0.000299957
0.36957	0.000336029	0.36957	0.000265411	0.36957	0.00029483
0.37201	0.000327789	0.37201	0.000261322	0.37201	0.000290009
0.37445	0.000320038	0.37445	0.000257385	0.37445	0.000285339
0.37689	0.000312714	0.37689	0.000253601	0.37689	0.000280823
0.37933	0.000305817	0.37933	0.000249939	0.37933	0.000276489
0.38177	0.000299347	0.38177	0.00024646	0.38177	0.000272369
0.38422	0.000293091	0.38422	0.000243042	0.38422	0.000268341
0.38666	0.000287231	0.38666	0.000239807	0.38666	0.000264526
0.3891	0.000281647	0.3891	0.000236603	0.3891	0.000260742
0.39154	0.000276306	0.39154	0.000233551	0.39154	0.000257172
0.39398	0.000271271	0.39398	0.00023056	0.39398	0.000253693
0.39642	0.000266388	0.39642	0.000227631	0.39642	0.000250336
0.39886	0.00026178	0.39886	0.000224823	0.39886	0.00024707
0.40131	0.000257355	0.40131	0.000222107	0.40131	0.000243927
0.40375	0.000253113	0.40375	0.000219391	0.40375	0.000240814
0.40619	0.000249054	0.40619	0.000216827	0.40619	0.000237885
0.40863	0.000245178	0.40863	0.000214325	0.40863	0.000234955
0.41107	0.000241425	0.41107	0.000211853	0.41107	0.000232239
0.41351	0.000237793	0.41351	0.000209473	0.41351	0.000229462
0.41595	0.000234344	0.41595	0.000207153	0.41595	0.000226837
0.4184	0.000230988	0.4184	0.000204926	0.4184	0.000224274
0.42084	0.000227783	0.42084	0.000202759	0.42084	0.000221802
0.42328	0.00022467	0.42328	0.000200623	0.42328	0.00021933
0.42572	0.000221649	0.42572	0.000198578	0.42572	0.00021698
0.42816	0.000218689	0.42816	0.000196564	0.42816	0.000214661
0.4306	0.00021582	0.4306	0.000194641	0.4306	0.000212463
0.43304	0.000213043	0.43304	0.000192749	0.43304	0.000210358
0.43549	0.000210388	0.43549	0.000190918	0.43549	0.000208313
0.43793	0.000207825	0.43793	0.000189117	0.43793	0.000206299
0.44037	0.000205353	0.44037	0.000187378	0.44037	0.000204376
0.44281	0.000202881	0.44281	0.000185669	0.44281	0.000202515
0.44525	0.000200562	0.44525	0.00018399	0.44525	0.000200714
0.44769	0.000198273	0.44769	0.000182343	0.44769	0.000198883
0.45013	0.000196106	0.45013	0.000180786	0.45013	0.000197144
0.45258	0.000194	0.45258	0.00017926	0.45258	0.000195465
0.45502	0.000191956	0.45502	0.000177795	0.45502	0.000193848
0.45746	0.000189972	0.45746	0.000176361	0.45746	0.00019223
0.4599	0.00018808	0.4599	0.000174988	0.4599	0.000190735
0.46234	0.000186218	0.46234	0.000173584	0.46234	0.000189209
0.46478	0.000184479	0.46478	0.000172272	0.46478	0.000187805
0.46722	0.000182709	0.46722	0.00017099	0.46722	0.00018634
0.46967	0.000181061	0.46967	0.000169708	0.46967	0.000184998
0.47211	0.000179474	0.47211	0.000168488	0.47211	0.000183624
0.47455	0.000177887	0.47455	0.000167297	0.47455	0.000182312
0.47699	0.000176361	0.47699	0.000166107	0.47699	0.00018103
0.47943	0.000174896	0.47943	0.000164978	0.47943	0.00017981
0.48187	0.000173462	0.48187	0.00016391	0.48187	0.000178589
0.48431	0.000172089	0.48431	0.000162842	0.48431	0.000177429
0.48676	0.000170746	0.48676	0.000161774	0.48676	0.00017627
0.4892	0.000169464	0.4892	0.000160767	0.4892	0.000175171
0.49164	0.000168182	0.49164	0.00015976	0.49164	0.000174103
0.49408	0.000166962	0.49408	0.000158783	0.49408	0.000173065
0.49652	0.000165741	0.49652	0.000157806	0.49652	0.000171997
0.49896	0.000165314	0.49896	0.00015686	0.49896	0.000171021
0.5014	0.000164398	0.5014	0.000155884	0.5014	0.000169983
0.50385	0.00016333	0.50385	0.000154968	0.50385	0.000169067
0.50629	0.00016214	0.50629	0.000154053	0.50629	0.00016806
0.50873	0.00016095	0.50873	0.000153229	0.50873	0.000167175
0.51117	0.00015979	0.51117	0.000152374	0.51117	0.00016626
0.51361	0.000158661	0.51361	0.00015155	0.51361	0.000165405
0.51605	0.000157593	0.51605	0.000150757	0.51605	0.00016452
0.51849	0.000156525	0.51849	0.000149963	0.51849	0.000163727
0.52094	0.000155487	0.52094	0.0001492	0.52094	0.000162903
0.52338	0.00015448	0.52338	0.000148438	0.52338	0.000162109
0.52582	0.000153503	0.52582	0.000147705	0.52582	0.000161285
0.52826	0.000152588	0.52826	0.000146973	0.52826	0.000160553
0.5307	0.000151672	0.5307	0.000146271	0.5307	0.00015979
0.53314	0.000150818	0.53314	0.000145569	0.53314	0.000159058
0.53558	0.000149994	0.53558	0.000144897	0.53558	0.000158325
0.53802	0.00014917	0.53802	0.000144226	0.53802	0.000157654
0.54047	0.000148376	0.54047	0.000143524	0.54047	0.000156982
0.54291	0.000147675	0.54291	0.000142914	0.54291	0.000156311
0.54535	0.000146912	0.54535	0.000142242	0.54535	0.00015564
0.54779	0.000146179	0.54779	0.000141632	0.54779	0.000155029
0.55023	0.000145599	0.55023	0.000141022	0.55023	0.000154419
0.55267	0.000145477	0.55267	0.000140442	0.55267	0.000153778
0.55511	0.000145569	0.55511	0.000139862	0.55511	0.000153198
0.55756	0.00014505	0.55756	0.000139313	0.55756	0.000152649
0.56	0.000144257	0.56	0.000138763	0.56	0.000152039
0.56244	0.000143402	0.56244	0.000138245	0.56244	0.000151489
0.56488	0.000142578	0.56488	0.000137695	0.56488	0.00015097
0.56732	0.000141846	0.56732	0.000137207	0.56732	0.000150482
0.56976	0.000141144	0.56976	0.000136688	0.56976	0.000149933
0.5722	0.000140503	0.5722	0.0001362	0.5722	0.000149445
0.57465	0.000139862	0.57465	0.000135773	0.57465	0.000148956
0.57709	0.000139252	0.57709	0.000135345	0.57709	0.000148529
0.57953	0.000138641	0.57953	0.000134918	0.57953	0.000148071
0.58197	0.000138031	0.58197	0.000134521	0.58197	0.000147644
0.58441	0.000137451	0.58441	0.000134064	0.58441	0.000147217
0.58685	0.000136902	0.58685	0.000133698	0.58685	0.00014682
0.58929	0.000136353	0.58929	0.000133301	0.58929	0.000146423
0.59174	0.000135803	0.59174	0.000132935	0.59174	0.000146088
0.59418	0.000135284	0.59418	0.000132599	0.59418	0.000145752
0.59662	0.000134796	0.59662	0.000132294	0.59662	0.000145447
0.59906	0.000134308	0.59906	0.000131958	0.59906	0.000145081
0.6015	0.00013382	0.6015	0.000131653	0.6015	0.000144806
0.60394	0.000133362	0.60394	0.000131348	0.60394	0.000144531
0.60638	0.000132996	0.60638	0.000131104	0.60638	0.000144287
0.60883	0.000132568	0.60883	0.000130829	0.60883	0.000144012
0.61127	0.000132172	0.61127	0.000130585	0.61127	0.000143768
0.61371	0.000131775	0.61371	0.000130341	0.61371	0.000143585
0.61615	0.000131439	0.61615	0.000130127	0.61615	0.000143402
0.61859	0.000134766	0.61859	0.000129913	0.61859	0.000143219
0.62103	0.000137634	0.62103	0.00012973	0.62103	0.000143066
0.62347	0.000139557	0.62347	0.000129578	0.62347	0.000142883
0.62592	0.0001409	0.62592	0.000129425	0.62592	0.000142792
0.62836	0.000141846	0.62836	0.000129272	0.62836	0.00014267
0.6308	0.000142517	0.6308	0.000129181	0.6308	0.000142578
0.63324	0.000143036	0.63324	0.00012912	0.63324	0.000142548
0.63568	0.000143402	0.63568	0.000129059	0.63568	0.000142517
0.63812	0.000143707	0.63812	0.000128998	0.63812	0.000142487
0.64056	0.000143921	0.64056	0.000129059	0.64056	0.000142517
0.64301	0.000144135	0.64301	0.000129059	0.64301	0.000142548
0.64545	0.000144318	0.64545	0.000129089	0.64545	0.000142639
0.64789	0.000144379	0.64789	0.000129181	0.64789	0.000142731
0.65033	0.000144379	0.65033	0.000129303	0.65033	0.000142883
0.65277	0.000144287	0.65277	0.000129486	0.65277	0.000143036
0.65521	0.000144196	0.65521	0.0001297	0.65521	0.000143311
0.65765	0.000144104	0.65765	0.000129913	0.65765	0.000143524
0.6601	0.000144043	0.6601	0.000130219	0.6601	0.000143829
0.66254	0.000144012	0.66254	0.000130524	0.66254	0.000144135
0.66498	0.000144043	0.66498	0.00013092	0.66498	0.000144531
0.66742	0.000144135	0.66742	0.000131317	0.66742	0.000144958
0.66986	0.000144257	0.66986	0.000131836	0.66986	0.000145447
0.6723	0.00014447	0.6723	0.000132385	0.6723	0.000145996
0.67474	0.000144806	0.67474	0.000132996	0.67474	0.000146637
0.67719	0.000145233	0.67719	0.000133698	0.67719	0.000147278
0.67963	0.000145782	0.67963	0.000134521	0.67963	0.000148071
0.68207	0.000146301	0.68207	0.000135315	0.68207	0.000148865
0.68451	0.000146881	0.68451	0.000136292	0.68451	0.000149811
0.68695	0.000147461	0.68695	0.000137299	0.68695	0.000150787
0.68939	0.000148132	0.68939	0.000138428	0.68939	0.000151886
0.69183	0.000148865	0.69183	0.000139679	0.69183	0.000153076
0.69427	0.000149719	0.69427	0.000141022	0.69427	0.000154419
0.69672	0.000150574	0.69672	0.000142456	0.69672	0.000155762
0.69916	0.000151581	0.69916	0.000144073	0.69916	0.000157349
0.7016	0.000152649	0.7016	0.000145752	0.7016	0.000158966
0.70404	0.0001539	0.70404	0.000147644	0.70404	0.000160767
0.70648	0.000155212	0.70648	0.000149597	0.70648	0.000162598
0.70892	0.000156677	0.70892	0.000151703	0.70892	0.000164612
0.71136	0.000158234	0.71136	0.0001539	0.71136	0.000166779
0.71381	0.000159943	0.71381	0.000156342	0.71381	0.000169128
0.71625	0.000161682	0.71625	0.000158844	0.71625	0.000171539
0.71869	0.000163635	0.71869	0.00016156	0.71869	0.000174103
0.72113	0.000165619	0.72113	0.000164276	0.72113	0.000176788
0.72357	0.000167786	0.72357	0.000167236	0.72357	0.000179657
0.72601	0.000170013	0.72601	0.000170288	0.72601	0.000182556
0.72845	0.000172424	0.72845	0.000173462	0.72845	0.000185638
0.7309	0.000174896	0.7309	0.000176788	0.7309	0.000188873
0.73334	0.000177521	0.73334	0.000180237	0.73334	0.000192261
0.73578	0.000180145	0.73578	0.000183716	0.73578	0.000195618
0.73822	0.000182983	0.73822	0.000187408	0.73822	0.000199249
0.74066	0.000185822	0.74066	0.000191071	0.74066	0.00020282
0.7431	0.000188812	0.7431	0.000194916	0.7431	0.000206573
0.74554	0.000191833	0.74554	0.000198792	0.74554	0.000210327
0.74799	0.000194977	0.74799	0.000202759	0.74799	0.000214203
0.75043	0.000198181	0.75043	0.000206787	0.75043	0.00021817
0.75287	0.000201538	0.75287	0.000210999	0.75287	0.00022229
0.75531	0.000204834	0.75531	0.000215088	0.75531	0.000226349
0.75775	0.000208313	0.75775	0.000219452	0.75775	0.000230621
0.76019	0.000211731	0.76019	0.000223694	0.76019	0.000234772
0.76263	0.000215302	0.76263	0.000228149	0.76263	0.000239136
0.76508	0.000218842	0.76508	0.000232544	0.76508	0.000243408
0.76752	0.000222504	0.76752	0.000237091	0.76752	0.000247864
0.76996	0.000226227	0.76996	0.000241699	0.76996	0.000252289
0.7724	0.000230042	0.7724	0.00024649	0.7724	0.000256927
0.77484	0.000233795	0.77484	0.00025116	0.77484	0.000261414
0.77728	0.000237732	0.77728	0.000256104	0.77728	0.000266144
0.77972	0.000241577	0.77972	0.000260925	0.77972	0.000270782
0.78217	0.000245575	0.78217	0.0002659	0.78217	0.000275574
0.78461	0.000249542	0.78461	0.000270935	0.78461	0.000280365
0.78705	0.000253632	0.78705	0.000276031	0.78705	0.000285309
0.78949	0.000257751	0.78949	0.00028125	0.78949	0.000290283
0.79193	0.000261993	0.79193	0.000286652	0.79193	0.00029541
0.79437	0.000266144	0.79437	0.000291901	0.79437	0.000300446
0.79681	0.000270538	0.79681	0.000297455	0.79681	0.000305725
0.79926	0.00027478	0.79926	0.000302917	0.79926	0.000310883
0.8017	0.000279236	0.8017	0.000308594	0.8017	0.000316315
0.80414	0.00028363	0.80414	0.000314178	0.80414	0.000321625
0.80658	0.000288147	0.80658	0.000319977	0.80658	0.000327087
0.80902	0.000292633	0.80902	0.000325836	0.80902	0.000332642
0.81146	0.000297333	0.81146	0.000331909	0.81146	0.000338348
0.8139	0.00030188	0.8139	0.000337769	0.8139	0.000343964
0.81635	0.000306641	0.81635	0.000343994	0.81635	0.000349854
0.81879	0.00031131	0.81879	0.000350098	0.81879	0.00035553
0.82123	0.000316132	0.82123	0.000356415	0.82123	0.000361481
0.82367	0.000320862	0.82367	0.000362701	0.82367	0.000367371
0.82611	0.000325714	0.82611	0.000369171	0.82611	0.00037323
0.82855	0.000330597	0.82855	0.000375732	0.82855	0.000379456
0.83099	0.000335632	0.83099	0.000382507	0.83099	0.000385803
0.83344	0.000340454	0.83344	0.000389099	0.83344	0.000392029
0.83588	0.00034549	0.83588	0.000396088	0.83588	0.00039856
0.83832	0.000350342	0.83832	0.000402893	0.83832	0.000404938
0.84076	0.000355347	0.84076	0.000410065	0.84076	0.000411621
0.8432	0.000360138	0.8432	0.000417023	0.8432	0.000418121
0.84564	0.00036499	0.84564	0.000424255	0.84564	0.000424896
0.84808	0.000369751	0.84808	0.000431549	0.84808	0.000431671
0.85052	0.000374542	0.85052	0.000439117	0.85052	0.00043866
0.85297	0.000378998	0.85297	0.000446472	0.85297	0.000445435
0.85541	0.000383575	0.85541	0.000454254	0.85541	0.000452576
0.85785	0.000387848	0.85785	0.000461823	0.85785	0.000459473
0.86029	0.000392059	0.86029	0.000469666	0.86029	0.000466522
0.86273	0.000396118	0.86273	0.000477509	0.86273	0.000473572
0.86517	0.000400085	0.86517	0.000485474	0.86517	0.000480743
0.86761	0.000403961	0.86761	0.0004935	0.86761	0.000487854
0.87006	0.000407867	0.87006	0.000501709	0.87006	0.000495117
0.8725	0.00041156	0.8725	0.000509644	0.8725	0.000502167
0.87494	0.000415436	0.87494	0.000517944	0.87494	0.00050943
0.87738	0.000419098	0.87738	0.00052594	0.87738	0.000516388
0.87982	0.000422974	0.87982	0.000534241	0.87982	0.000523621
0.88226	0.000426727	0.88226	0.000543427	0.88226	0.000530487
0.8847	0.000430573	0.8847	0.000556732	0.8847	0.000537445
0.88715	0.000434418	0.88715	0.000566986	0.88715	0.00054422
0.88959	0.000438354	0.88959	0.00057608	0.88959	0.000550964
0.89203	0.000442108	0.89203	0.000584137	0.89203	0.00055719
0.89447	0.000446045	0.89447	0.000592133	0.89447	0.000563538
0.89691	0.00044986	0.89691	0.000599548	0.89691	0.000569244
0.89935	0.000453796	0.89935	0.000606873	0.89935	0.000574738
0.90179	0.000457642	0.90179	0.000614014	0.90179	0.00057962
0.90424	0.000461487	0.90424	0.000620728	0.90424	0.000584076
0.90668	0.000465393	0.90668	0.000626526	0.90668	0.000587891
0.90912	0.00046936	0.90912	0.000632019	0.90912	0.000591339
0.91156	0.000473175	0.91156	0.000636597	0.91156	0.000594055
0.914	0.000477112	0.914	0.000640869	0.914	0.000596771
0.91644	0.000480927	0.91644	0.000643616	0.91644	0.000599121
0.91888	0.000484924	0.91888	0.000645447	0.91888	0.000601959
0.92133	0.000488708	0.92133	0.000646057	0.92133	0.000605164
0.92377	0.000492554	0.92377	0.000645447	0.92377	0.000608521
0.92621	0.000496185	0.92621	0.000643921	0.92621	0.000612488
0.92865	0.000499542	0.92865	0.000641479	0.92865	0.000617065
0.93109	0.000502991	0.93109	0.000638123	0.93109	0.000621643
0.93353	0.000506744	0.93353	0.000635681	0.93353	0.000626526
0.93597	0.000510376	0.93597	0.000633545	0.93597	0.000631409
0.93842	0.000514099	0.93842	0.000632935	0.93842	0.000636597
0.94086	0.0005177	0.94086	0.000633545	0.94086	0.000641785
0.9433	0.000521332	0.9433	0.000635681	0.9433	0.000646973
0.94574	0.000524933	0.94574	0.000638428	0.94574	0.000652161
0.94818	0.000528595	0.94818	0.00064209	0.94818	0.000657654
0.95062	0.000532074	0.95062	0.000645447	0.95062	0.000662842
0.95306	0.000535736	0.95306	0.000649414	0.95306	0.000668335
0.95551	0.000539154	0.95551	0.000653381	0.95551	0.000673218
0.95795	0.000542786	0.95795	0.000657654	0.95795	0.000678406
0.96039	0.000546143	0.96039	0.000661621	0.96039	0.000683289
0.96283	0.000549652	0.96283	0.000665894	0.96283	0.000688171
0.96527	0.000553101	0.96527	0.000669861	0.96527	0.000693054
0.96771	0.000556549	0.96771	0.000673828	0.96771	0.000697632
0.97015	0.000559875	0.97015	0.000677795	0.97015	0.000702209
0.9726	0.000563293	0.9726	0.000681763	0.9726	0.000706482
0.97504	0.000566467	0.97504	0.000685425	0.97504	0.000710449
0.97748	0.000569763	0.97748	0.000689392	0.97748	0.000714417
0.97992	0.000572968	0.97992	0.000692749	0.97992	0.000718689
0.98236	0.000576172	0.98236	0.000696411	0.98236	0.000722351
0.9848	0.000579346	0.9848	0.000699768	0.9848	0.000726013
0.98724	0.000582581	0.98724	0.000703125	0.98724	0.000729675
0.98969	0.000585632	0.98969	0.000706177	0.98969	0.000733032
0.99213	0.000588867	0.99213	0.000709229	0.99213	0.000736389
0.99457	0.000591858	0.99457	0.00071228	0.99457	0.000739746
0.99701	0.000595001	0.99701	0.000715027	0.99701	0.000743103
0.99945	0.0005979	0.99945	0.000717773	0.99945	0.000746155
1.00189	0.000600891	1.00189	0.00072052	1.00189	0.000749207

## Sheet: Figure 5 (c)
-0.99762	-0.000999969	-0.99762	-0.01	-0.99762	-0.00891
-0.99518	-0.00225	-0.99518	-0.00981	-0.99518	-0.00712
-0.99274	-0.00196	-0.99274	-0.00846	-0.99274	-0.00617
-0.9903	-0.00177	-0.9903	-0.00753	-0.9903	-0.00548
-0.98785	-0.00164	-0.98785	-0.00675	-0.98785	-0.00481
-0.98541	-0.00154	-0.98541	-0.00596	-0.98541	-0.00419
-0.98297	-0.00146	-0.98297	-0.00497	-0.98297	-0.00356
-0.98053	-0.0014	-0.98053	-0.00382	-0.98053	-0.003
-0.97809	-0.00135	-0.97809	-0.00335	-0.97809	-0.00273
-0.97565	-0.0013	-0.97565	-0.00314	-0.97565	-0.00256
-0.97321	-0.00126	-0.97321	-0.00302	-0.97321	-0.00242
-0.97076	-0.00122	-0.97076	-0.0029	-0.97076	-0.0023
-0.96832	-0.00118	-0.96832	-0.00279	-0.96832	-0.0022
-0.96588	-0.00115	-0.96588	-0.00267	-0.96588	-0.00211
-0.96344	-0.00112	-0.96344	-0.00255	-0.96344	-0.00202
-0.961	-0.00109	-0.961	-0.00243	-0.961	-0.00194
-0.95856	-0.00106	-0.95856	-0.00231	-0.95856	-0.00186
-0.95612	-0.00104	-0.95612	-0.00219	-0.95612	-0.0018
-0.95367	-0.00101	-0.95367	-0.00208	-0.95367	-0.00174
-0.95123	-0.00098938	-0.95123	-0.00197	-0.95123	-0.00168
-0.94879	-0.000966797	-0.94879	-0.00187	-0.94879	-0.00162
-0.94635	-0.000945129	-0.94635	-0.00178	-0.94635	-0.00157
-0.94391	-0.000924377	-0.94391	-0.00169	-0.94391	-0.00152
-0.94147	-0.000903931	-0.94147	-0.00161	-0.94147	-0.00147
-0.93903	-0.00088501	-0.93903	-0.00154	-0.93903	-0.00143
-0.93658	-0.000866089	-0.93658	-0.00147	-0.93658	-0.00139
-0.93414	-0.000848694	-0.93414	-0.00141	-0.93414	-0.00135
-0.9317	-0.000830994	-0.9317	-0.00135	-0.9317	-0.00132
-0.92926	-0.000813904	-0.92926	-0.00129	-0.92926	-0.00128
-0.92682	-0.000797729	-0.92682	-0.00124	-0.92682	-0.00125
-0.92438	-0.00078186	-0.92438	-0.0012	-0.92438	-0.00122
-0.92194	-0.000766602	-0.92194	-0.00116	-0.92194	-0.00118
-0.91949	-0.000751953	-0.91949	-0.00113	-0.91949	-0.00116
-0.91705	-0.00073761	-0.91705	-0.0011	-0.91705	-0.00113
-0.91461	-0.000723572	-0.91461	-0.00108	-0.91461	-0.0011
-0.91217	-0.000710144	-0.91217	-0.00106	-0.91217	-0.00107
-0.90973	-0.000696716	-0.90973	-0.00104	-0.90973	-0.00105
-0.90729	-0.000683899	-0.90729	-0.00102	-0.90729	-0.00103
-0.90485	-0.000671082	-0.90485	-0.00101	-0.90485	-0.00101
-0.9024	-0.000658264	-0.9024	-0.000992126	-0.9024	-0.000984497
-0.89996	-0.000646667	-0.89996	-0.000976868	-0.89996	-0.00096283
-0.89752	-0.000634155	-0.89752	-0.000962219	-0.89752	-0.000943909
-0.89508	-0.000623779	-0.89508	-0.000947266	-0.89508	-0.000926208
-0.89264	-0.000612183	-0.89264	-0.000932617	-0.89264	-0.000908508
-0.8902	-0.000602112	-0.8902	-0.000918274	-0.8902	-0.000890808
-0.88776	-0.000591125	-0.88776	-0.000904236	-0.88776	-0.000874634
-0.88531	-0.000580444	-0.88531	-0.000890503	-0.88531	-0.000859375
-0.88287	-0.000570068	-0.88287	-0.00087677	-0.88287	-0.000843506
-0.88043	-0.000559998	-0.88043	-0.000863953	-0.88043	-0.000828552
-0.87799	-0.000550232	-0.87799	-0.000851135	-0.87799	-0.000814209
-0.87555	-0.000540771	-0.87555	-0.000838928	-0.87555	-0.000800781
-0.87311	-0.000531311	-0.87311	-0.000826416	-0.87311	-0.000787659
-0.87067	-0.000522156	-0.87067	-0.000814819	-0.87067	-0.000775452
-0.86823	-0.000513	-0.86823	-0.000802917	-0.86823	-0.000762939
-0.86578	-0.00050415	-0.86578	-0.000791626	-0.86578	-0.000751038
-0.86334	-0.000495758	-0.86334	-0.000780334	-0.86334	-0.000739136
-0.8609	-0.000487396	-0.8609	-0.000769958	-0.8609	-0.000728149
-0.85846	-0.000479004	-0.85846	-0.000759277	-0.85846	-0.000716553
-0.85602	-0.000470642	-0.85602	-0.000749207	-0.85602	-0.000706177
-0.85358	-0.000462646	-0.85358	-0.000739136	-0.85358	-0.000695801
-0.85114	-0.000454224	-0.85114	-0.000729065	-0.85114	-0.000686035
-0.84869	-0.000446381	-0.84869	-0.000719299	-0.84869	-0.000675964
-0.84625	-0.000441925	-0.84625	-0.000710449	-0.84625	-0.000666504
-0.84381	-0.000434845	-0.84381	-0.000700989	-0.84381	-0.000657349
-0.84137	-0.000427429	-0.84137	-0.000692139	-0.84137	-0.000648193
-0.83893	-0.000420166	-0.83893	-0.000683289	-0.83893	-0.000639038
-0.83649	-0.000413116	-0.83649	-0.000674744	-0.83649	-0.000630493
-0.83405	-0.000406067	-0.83405	-0.000666199	-0.83405	-0.000622253
-0.8316	-0.000399384	-0.8316	-0.000657654	-0.8316	-0.000614319
-0.82916	-0.000392487	-0.82916	-0.000649414	-0.82916	-0.000605774
-0.82672	-0.000386017	-0.82672	-0.000641479	-0.82672	-0.000597839
-0.82428	-0.000379761	-0.82428	-0.00063324	-0.82428	-0.0005896
-0.82184	-0.000373352	-0.82184	-0.00062561	-0.82184	-0.000583191
-0.8194	-0.000367065	-0.8194	-0.000617981	-0.8194	-0.000574646
-0.81696	-0.000361237	-0.81696	-0.000610352	-0.81696	-0.000567322
-0.81451	-0.000355774	-0.81451	-0.000602722	-0.81451	-0.000559998
-0.81207	-0.000349487	-0.81207	-0.000595093	-0.81207	-0.000553284
-0.80963	-0.000343445	-0.80963	-0.000587769	-0.80963	-0.00054718
-0.80719	-0.000337646	-0.80719	-0.00058075	-0.80719	-0.000540771
-0.80475	-0.000331848	-0.80475	-0.000573425	-0.80475	-0.000534363
-0.80231	-0.000326233	-0.80231	-0.000566406	-0.80231	-0.000527954
-0.79987	-0.000320862	-0.79987	-0.000559387	-0.79987	-0.00052124
-0.79742	-0.000315399	-0.79742	-0.000552673	-0.79742	-0.000515137
-0.79498	-0.000309967	-0.79498	-0.000545959	-0.79498	-0.000509033
-0.79254	-0.000304718	-0.79254	-0.000539551	-0.79254	-0.000503235
-0.7901	-0.000299438	-0.7901	-0.000532837	-0.7901	-0.000497986
-0.78766	-0.000294403	-0.78766	-0.000526123	-0.78766	-0.000492462
-0.78522	-0.000289215	-0.78522	-0.000519714	-0.78522	-0.000487152
-0.78278	-0.000284363	-0.78278	-0.000513306	-0.78278	-0.0004823
-0.78033	-0.000279755	-0.78033	-0.000506897	-0.78033	-0.000476593
-0.77789	-0.000274872	-0.77789	-0.000500488	-0.77789	-0.000471191
-0.77545	-0.000270081	-0.77545	-0.000494812	-0.77545	-0.00046698
-0.77301	-0.000265472	-0.77301	-0.000488556	-0.77301	-0.00046167
-0.77057	-0.000260956	-0.77057	-0.000482208	-0.77057	-0.000456421
-0.76813	-0.00025647	-0.76813	-0.000476105	-0.76813	-0.00045166
-0.76569	-0.000252167	-0.76569	-0.000469818	-0.76569	-0.000446716
-0.76324	-0.000247955	-0.76324	-0.000463379	-0.76324	-0.000442139
-0.7608	-0.000243805	-0.7608	-0.000457306	-0.7608	-0.000437286
-0.75836	-0.000239777	-0.75836	-0.000451447	-0.75836	-0.000432648
-0.75592	-0.000235748	-0.75592	-0.000445526	-0.75592	-0.000428101
-0.75348	-0.000231873	-0.75348	-0.000439606	-0.75348	-0.000423676
-0.75104	-0.000228119	-0.75104	-0.000434021	-0.75104	-0.000420105
-0.7486	-0.000224274	-0.7486	-0.000428375	-0.7486	-0.000415558
-0.74615	-0.000220459	-0.74615	-0.000422455	-0.74615	-0.000411011
-0.74371	-0.000216736	-0.74371	-0.000416779	-0.74371	-0.000406464
-0.74127	-0.000213013	-0.74127	-0.000411041	-0.74127	-0.000401489
-0.73883	-0.000209442	-0.73883	-0.000405518	-0.73883	-0.000396942
-0.73639	-0.000205963	-0.73639	-0.000400055	-0.73639	-0.000392426
-0.73395	-0.000202576	-0.73395	-0.000394653	-0.73395	-0.000388062
-0.73151	-0.000199127	-0.73151	-0.000389191	-0.73151	-0.000383728
-0.72906	-0.000195801	-0.72906	-0.000384003	-0.72906	-0.000379578
-0.72662	-0.000192383	-0.72662	-0.000378723	-0.72662	-0.000375336
-0.72418	-0.000189117	-0.72418	-0.000373657	-0.72418	-0.000371338
-0.72174	-0.000185883	-0.72174	-0.000368469	-0.72174	-0.000367188
-0.7193	-0.0001828	-0.7193	-0.000363556	-0.7193	-0.00036319
-0.71686	-0.00017981	-0.71686	-0.000358704	-0.71686	-0.000359161
-0.71442	-0.000176941	-0.71442	-0.000353912	-0.71442	-0.000355286
-0.71198	-0.000174561	-0.71198	-0.000349213	-0.71198	-0.000351532
-0.70953	-0.000171906	-0.70953	-0.000344666	-0.70953	-0.000347992
-0.70709	-0.000169098	-0.70709	-0.000340027	-0.70709	-0.000344482
-0.70465	-0.000166382	-0.70465	-0.000335663	-0.70465	-0.000341003
-0.70221	-0.000163666	-0.70221	-0.000331268	-0.70221	-0.000337646
-0.69977	-0.000161072	-0.69977	-0.000327026	-0.69977	-0.000334412
-0.69733	-0.000158447	-0.69733	-0.000322845	-0.69733	-0.000331085
-0.69489	-0.000156036	-0.69489	-0.000318756	-0.69489	-0.00032785
-0.69244	-0.000153595	-0.69244	-0.000314667	-0.69244	-0.000324646
-0.69	-0.000151215	-0.69	-0.000310791	-0.69	-0.000321655
-0.68756	-0.000148712	-0.68756	-0.000306885	-0.68756	-0.000318573
-0.68512	-0.000146362	-0.68512	-0.000303253	-0.68512	-0.000315643
-0.68268	-0.000143982	-0.68268	-0.000299438	-0.68268	-0.000312592
-0.68024	-0.000141754	-0.68024	-0.000295898	-0.68024	-0.000309814
-0.6778	-0.000139526	-0.6778	-0.000292389	-0.6778	-0.000306976
-0.67535	-0.00013736	-0.67535	-0.00028894	-0.67535	-0.000304321
-0.67291	-0.000135254	-0.67291	-0.000285522	-0.67291	-0.000301666
-0.67047	-0.00013324	-0.67047	-0.000282288	-0.67047	-0.000299194
-0.66803	-0.000131226	-0.66803	-0.000278992	-0.66803	-0.000296478
-0.66559	-0.000129669	-0.66559	-0.00027597	-0.66559	-0.000294128
-0.66315	-0.000127838	-0.66315	-0.000272888	-0.66315	-0.000291718
-0.66071	-0.000126007	-0.66071	-0.000269928	-0.66071	-0.000289398
-0.65826	-0.000124176	-0.65826	-0.000266968	-0.65826	-0.000287201
-0.65582	-0.000122406	-0.65582	-0.000264038	-0.65582	-0.000285095
-0.65338	-0.000120636	-0.65338	-0.00026123	-0.65338	-0.00028299
-0.65094	-0.000118958	-0.65094	-0.000258484	-0.65094	-0.000281036
-0.6485	-0.00011731	-0.6485	-0.000255707	-0.6485	-0.000279022
-0.64606	-0.000115784	-0.64606	-0.000253113	-0.64606	-0.00027713
-0.64362	-0.000114197	-0.64362	-0.000250488	-0.64362	-0.000275269
-0.64117	-0.000112671	-0.64117	-0.000248077	-0.64117	-0.00027359
-0.63873	-0.000111206	-0.63873	-0.000245636	-0.63873	-0.000271912
-0.63629	-0.000109741	-0.63629	-0.000243256	-0.63629	-0.000270264
-0.63385	-0.000108307	-0.63385	-0.000240875	-0.63385	-0.000268738
-0.63141	-0.000106964	-0.63141	-0.000238678	-0.63141	-0.000267273
-0.62897	-0.000105591	-0.62897	-0.000236389	-0.62897	-0.000265717
-0.62653	-0.000104279	-0.62653	-0.000234314	-0.62653	-0.000264221
-0.62408	-0.000103058	-0.62408	-0.000232239	-0.62408	-0.000262604
-0.62164	-0.000101868	-0.62164	-0.000230225	-0.62164	-0.000260925
-0.6192	-0.000100708	-0.6192	-0.000228394	-0.6192	-0.000259003
-0.61676	-9.95483e-05	-0.61676	-0.000226501	-0.61676	-0.000256989
-0.61432	-9.84192e-05	-0.61432	-0.000224579	-0.61432	-0.000254669
-0.61188	-9.73511e-05	-0.61188	-0.000222717	-0.61188	-0.00025235
-0.60944	-9.6405e-05	-0.60944	-0.000220856	-0.60944	-0.000249512
-0.60699	-9.54895e-05	-0.60699	-0.000219177	-0.60699	-0.00024646
-0.60455	-9.45129e-05	-0.60455	-0.000217346	-0.60455	-0.000243103
-0.60211	-9.36279e-05	-0.60211	-0.000215698	-0.60211	-0.000239624
-0.59967	-9.26819e-05	-0.59967	-0.00021402	-0.59967	-0.000235931
-0.59723	-9.17664e-05	-0.59723	-0.000212372	-0.59723	-0.000232117
-0.59479	-9.08508e-05	-0.59479	-0.000210724	-0.59479	-0.00022821
-0.59235	-8.99963e-05	-0.59235	-0.000209229	-0.59235	-0.000224396
-0.5899	-8.91113e-05	-0.5899	-0.000207611	-0.5899	-0.000220581
-0.58746	-8.83179e-05	-0.58746	-0.000206116	-0.58746	-0.000216888
-0.58502	-8.74939e-05	-0.58502	-0.000204651	-0.58502	-0.000213257
-0.58258	-8.6731e-05	-0.58258	-0.000203217	-0.58258	-0.000209808
-0.58014	-8.5968e-05	-0.58014	-0.000201782	-0.58014	-0.000206451
-0.5777	-8.52356e-05	-0.5777	-0.000200409	-0.5777	-0.000203308
-0.57526	-8.45337e-05	-0.57526	-0.000198975	-0.57526	-0.000200287
-0.57281	-8.38928e-05	-0.57281	-0.000197693	-0.57281	-0.000197449
-0.57037	-8.32214e-05	-0.57037	-0.00019632	-0.57037	-0.000194702
-0.56793	-8.255e-05	-0.56793	-0.000195099	-0.56793	-0.000192108
-0.56549	-8.18481e-05	-0.56549	-0.000193756	-0.56549	-0.000189545
-0.56305	-8.12073e-05	-0.56305	-0.000192566	-0.56305	-0.000187195
-0.56061	-8.05664e-05	-0.56061	-0.000191315	-0.56061	-0.000184967
-0.55817	-7.99561e-05	-0.55817	-0.000190125	-0.55817	-0.000182739
-0.55573	-7.93762e-05	-0.55573	-0.000188873	-0.55573	-0.000180634
-0.55328	-7.88269e-05	-0.55328	-0.000187805	-0.55328	-0.00017865
-0.55084	-7.82166e-05	-0.55084	-0.000186615	-0.55084	-0.000176605
-0.5484	-7.76978e-05	-0.5484	-0.000185577	-0.5484	-0.000174774
-0.54596	-7.71484e-05	-0.54596	-0.000184387	-0.54596	-0.000172913
-0.54352	-7.66296e-05	-0.54352	-0.000183319	-0.54352	-0.000171173
-0.54108	-7.61108e-05	-0.54108	-0.00018219	-0.54108	-0.000169525
-0.53864	-7.5592e-05	-0.53864	-0.000181061	-0.53864	-0.000167786
-0.53619	-7.50732e-05	-0.53619	-0.000179932	-0.53619	-0.000166107
-0.53375	-7.4585e-05	-0.53375	-0.000178925	-0.53375	-0.00016449
-0.53131	-7.40662e-05	-0.53131	-0.000177826	-0.53131	-0.000162872
-0.52887	-7.36084e-05	-0.52887	-0.00017691	-0.52887	-0.000161255
-0.52643	-7.33948e-05	-0.52643	-0.000175812	-0.52643	-0.000159607
-0.52399	-7.30896e-05	-0.52399	-0.000174866	-0.52399	-0.000158112
-0.52155	-7.26318e-05	-0.52155	-0.000173828	-0.52155	-0.000156555
-0.5191	-7.21436e-05	-0.5191	-0.000172821	-0.5191	-0.000155029
-0.51666	-7.16553e-05	-0.51666	-0.000171753	-0.51666	-0.000153564
-0.51422	-7.1228e-05	-0.51422	-0.000170868	-0.51422	-0.000151978
-0.51178	-7.07397e-05	-0.51178	-0.000169769	-0.51178	-0.000150452
-0.50934	-7.03125e-05	-0.50934	-0.000168884	-0.50934	-0.000148987
-0.5069	-6.98547e-05	-0.5069	-0.000167877	-0.5069	-0.000147522
-0.50446	-6.94275e-05	-0.50446	-0.000166931	-0.50446	-0.000145996
-0.50201	-6.89697e-05	-0.50201	-0.000165955	-0.50201	-0.00014447
-0.49957	-6.85425e-05	-0.49957	-0.000164978	-0.49957	-0.000142975
-0.49713	-6.81152e-05	-0.49713	-0.000163971	-0.49713	-0.000141479
-0.49469	-6.77185e-05	-0.49469	-0.000163086	-0.49469	-0.000140015
-0.49225	-6.72607e-05	-0.49225	-0.000162048	-0.49225	-0.00013855
-0.48981	-6.6864e-05	-0.48981	-0.000161163	-0.48981	-0.000137207
-0.48737	-6.64368e-05	-0.48737	-0.000160126	-0.48737	-0.000135742
-0.48492	-6.604e-05	-0.48492	-0.000159241	-0.48492	-0.000134338
-0.48248	-6.56128e-05	-0.48248	-0.000158264	-0.48248	-0.000132904
-0.48004	-6.52161e-05	-0.48004	-0.000157288	-0.48004	-0.0001315
-0.4776	-6.47888e-05	-0.4776	-0.000156281	-0.4776	-0.000130035
-0.47516	-6.44226e-05	-0.47516	-0.000155396	-0.47516	-0.000128632
-0.47272	-6.39954e-05	-0.47272	-0.000154358	-0.47272	-0.000127167
-0.47028	-6.35986e-05	-0.47028	-0.000153473	-0.47028	-0.000125763
-0.46783	-6.32324e-05	-0.46783	-0.000152496	-0.46783	-0.000124329
-0.46539	-6.28357e-05	-0.46539	-0.000151581	-0.46539	-0.000122925
-0.46295	-6.24695e-05	-0.46295	-0.000150574	-0.46295	-0.00012149
-0.46051	-6.20728e-05	-0.46051	-0.000149628	-0.46051	-0.000120026
-0.45807	-6.16455e-05	-0.45807	-0.000148621	-0.45807	-0.000118561
-0.45563	-6.13098e-05	-0.45563	-0.000147766	-0.45563	-0.000117188
-0.45319	-6.08826e-05	-0.45319	-0.000146729	-0.45319	-0.000115692
-0.45074	-6.05164e-05	-0.45074	-0.000145813	-0.45074	-0.000114288
-0.4483	-6.01196e-05	-0.4483	-0.000144775	-0.4483	-0.000112793
-0.44586	-5.97534e-05	-0.44586	-0.00014386	-0.44586	-0.00011145
-0.44342	-5.93567e-05	-0.44342	-0.000142883	-0.44342	-0.000110077
-0.44098	-5.89905e-05	-0.44098	-0.000141876	-0.44098	-0.000108704
-0.43854	-5.85632e-05	-0.43854	-0.000140778	-0.43854	-0.000107269
-0.4361	-5.82275e-05	-0.4361	-0.000139862	-0.4361	-0.000105927
-0.43365	-5.78003e-05	-0.43365	-0.000138763	-0.43365	-0.000104431
-0.43121	-5.74646e-05	-0.43121	-0.000137817	-0.43121	-0.000103058
-0.42877	-5.70374e-05	-0.42877	-0.00013678	-0.42877	-0.000101624
-0.42633	-5.66711e-05	-0.42633	-0.000135773	-0.42633	-0.00010022
-0.42389	-5.63354e-05	-0.42389	-0.000134735	-0.42389	-9.87854e-05
-0.42145	-5.59692e-05	-0.42145	-0.000133698	-0.42145	-9.73511e-05
-0.41901	-5.5542e-05	-0.41901	-0.000132599	-0.41901	-9.59167e-05
-0.41656	-5.51758e-05	-0.41656	-0.000131592	-0.41656	-9.45435e-05
-0.41412	-5.47485e-05	-0.41412	-0.000130463	-0.41412	-9.30786e-05
-0.41168	-5.43823e-05	-0.41168	-0.000129486	-0.41168	-9.17358e-05
-0.40924	-5.39551e-05	-0.40924	-0.000128326	-0.40924	-9.0271e-05
-0.4068	-5.35583e-05	-0.4068	-0.000127319	-0.4068	-8.88977e-05
-0.40436	-5.31616e-05	-0.40436	-0.00012619	-0.40436	-8.74634e-05
-0.40192	-5.27344e-05	-0.40192	-0.000125061	-0.40192	-8.59375e-05
-0.39948	-5.23071e-05	-0.39948	-0.000123871	-0.39948	-8.45032e-05
-0.39703	-5.19409e-05	-0.39703	-0.000122803	-0.39703	-8.31299e-05
-0.39459	-5.14832e-05	-0.39459	-0.000121582	-0.39459	-8.16956e-05
-0.39215	-5.10864e-05	-0.39215	-0.000120514	-0.39215	-8.03528e-05
-0.38971	-5.06592e-05	-0.38971	-0.000119354	-0.38971	-7.89185e-05
-0.38727	-5.02319e-05	-0.38727	-0.000118195	-0.38727	-7.75452e-05
-0.38483	-4.98047e-05	-0.38483	-0.000117004	-0.38483	-7.61108e-05
-0.38239	-4.94171e-05	-0.38239	-0.000115814	-0.38239	-7.47375e-05
-0.37994	-4.89532e-05	-0.37994	-0.000114563	-0.37994	-7.33032e-05
-0.3775	-4.85443e-05	-0.3775	-0.000113403	-0.3775	-7.19604e-05
-0.37506	-4.80713e-05	-0.37506	-0.000112122	-0.37506	-7.05261e-05
-0.37262	-4.74701e-05	-0.37262	-0.000110962	-0.37262	-6.92139e-05
-0.37018	-4.69879e-05	-0.37018	-0.000109619	-0.37018	-6.7749e-05
-0.36774	-4.65668e-05	-0.36774	-0.000108459	-0.36774	-6.64063e-05
-0.3653	-4.60876e-05	-0.3653	-0.000107178	-0.3653	-6.50024e-05
-0.36285	-4.56177e-05	-0.36285	-0.000105896	-0.36285	-6.36292e-05
-0.36041	-4.51233e-05	-0.36041	-0.000104523	-0.36041	-6.21948e-05
-0.35797	-4.46808e-05	-0.35797	-0.000103302	-0.35797	-6.08215e-05
-0.35553	-4.41833e-05	-0.35553	-0.000101898	-0.35553	-5.93872e-05
-0.35309	-4.375e-05	-0.35309	-0.000100677	-0.35309	-5.80444e-05
-0.35065	-4.32648e-05	-0.35065	-9.93042e-05	-0.35065	-5.66101e-05
-0.34821	-4.2804e-05	-0.34821	-9.80225e-05	-0.34821	-5.52368e-05
-0.34576	-4.23218e-05	-0.34576	-9.66492e-05	-0.34576	-5.3833e-05
-0.34332	-4.18335e-05	-0.34332	-9.52759e-05	-0.34332	-5.24597e-05
-0.34088	-4.13116e-05	-0.34088	-9.38416e-05	-0.34088	-5.10254e-05
-0.33844	-4.08508e-05	-0.33844	-9.25293e-05	-0.33844	-4.96826e-05
-0.336	-4.03229e-05	-0.336	-9.10645e-05	-0.336	-4.83002e-05
-0.33356	-3.98529e-05	-0.33356	-8.97217e-05	-0.33356	-4.69421e-05
-0.33112	-3.93097e-05	-0.33112	-8.82263e-05	-0.33112	-4.55017e-05
-0.32867	-3.88306e-05	-0.32867	-8.68835e-05	-0.32867	-4.4162e-05
-0.32623	-3.83179e-05	-0.32623	-8.55103e-05	-0.32623	-4.25659e-05
-0.32379	-3.78052e-05	-0.32379	-8.41064e-05	-0.32379	-4.11713e-05
-0.32135	-3.72528e-05	-0.32135	-8.25806e-05	-0.32135	-3.97339e-05
-0.31891	-3.67676e-05	-0.31891	-8.12683e-05	-0.31891	-3.83972e-05
-0.31647	-3.62091e-05	-0.31647	-7.97424e-05	-0.31647	-3.69629e-05
-0.31403	-3.57178e-05	-0.31403	-7.83691e-05	-0.31403	-3.56323e-05
-0.31158	-3.51563e-05	-0.31158	-7.68738e-05	-0.31158	-3.42285e-05
-0.30914	-3.46283e-05	-0.30914	-7.54395e-05	-0.30914	-3.28735e-05
-0.3067	-3.40851e-05	-0.3067	-7.39746e-05	-0.3067	-3.15033e-05
-0.30426	-3.35449e-05	-0.30426	-7.25098e-05	-0.30426	-3.0127e-05
-0.30182	-3.29712e-05	-0.30182	-7.10144e-05	-0.30182	-2.87109e-05
-0.29938	-3.24554e-05	-0.29938	-6.96411e-05	-0.29938	-2.73865e-05
-0.29694	-3.18848e-05	-0.29694	-6.81152e-05	-0.29694	-2.59735e-05
-0.29449	-3.13751e-05	-0.29449	-6.67114e-05	-0.29449	-2.46613e-05
-0.29205	-3.07892e-05	-0.29205	-6.51855e-05	-0.29205	-2.32574e-05
-0.28961	-3.02734e-05	-0.28961	-6.37817e-05	-0.28961	-2.19482e-05
-0.28717	-2.9718e-05	-0.28717	-6.23169e-05	-0.28717	-2.06024e-05
-0.28473	-2.91626e-05	-0.28473	-6.08521e-05	-0.28473	-1.92535e-05
-0.28229	-2.85797e-05	-0.28229	-5.93262e-05	-0.28229	-1.78711e-05
-0.27985	-2.80609e-05	-0.27985	-5.79529e-05	-0.27985	-1.65894e-05
-0.2774	-2.74719e-05	-0.2774	-5.6427e-05	-0.2774	-1.52252e-05
-0.27496	-2.69531e-05	-0.27496	-5.50537e-05	-0.27496	-1.39679e-05
-0.27252	-2.64038e-05	-0.27252	-5.36499e-05	-0.27252	-1.26801e-05
-0.27008	-2.58606e-05	-0.27008	-5.22461e-05	-0.27008	-1.14227e-05
-0.26764	-2.53052e-05	-0.26764	-5.08118e-05	-0.26764	-1.01685e-05
-0.2652	-2.47437e-05	-0.2652	-4.93774e-05	-0.2652	-8.9325e-06
-0.26276	-2.41608e-05	-0.26276	-4.79492e-05	-0.26276	-7.68433e-06
-0.26031	-2.36481e-05	-0.26031	-4.66217e-05	-0.26031	-6.55212e-06
-0.25787	-2.30652e-05	-0.25787	-4.51447e-05	-0.25787	-5.36194e-06
-0.25543	-2.25525e-05	-0.25543	-4.38232e-05	-0.25543	-4.28192e-06
-0.25299	-2.19635e-05	-0.25299	-4.2157e-05	-0.25299	-3.12866e-06
-0.25055	-2.14539e-05	-0.25055	-4.08722e-05	-0.25055	-2.06909e-06
-0.24811	-2.08984e-05	-0.24811	-3.9505e-05	-0.24811	-9.32617e-07
-0.24567	-2.03522e-05	-0.24567	-3.81409e-05	-0.24567	2.3407e-07
-0.24323	-1.97723e-05	-0.24323	-3.67249e-05	-0.24323	1.51642e-06
-0.24078	-1.92566e-05	-0.24078	-3.54706e-05	-0.24078	2.78198e-06
-0.23834	-1.86737e-05	-0.23834	-3.40698e-05	-0.23834	4.25903e-06
-0.2359	-1.8158e-05	-0.2359	-3.28339e-05	-0.2359	5.69824e-06
-0.23346	-1.75964e-05	-0.23346	-3.15033e-05	-0.23346	7.28821e-06
-0.23102	-1.70624e-05	-0.23102	-3.0249e-05	-0.23102	8.88977e-06
-0.22858	-1.65039e-05	-0.22858	-2.89581e-05	-0.22858	1.05804e-05
-0.22614	-1.59515e-05	-0.22614	-2.76764e-05	-0.22614	1.22955e-05
-0.22369	-1.53625e-05	-0.22369	-2.6358e-05	-0.22369	1.41205e-05
-0.22125	-1.48438e-05	-0.22125	-2.51709e-05	-0.22125	1.58386e-05
-0.21881	-1.42487e-05	-0.21881	-2.38831e-05	-0.21881	1.77734e-05
-0.21637	-1.37207e-05	-0.21637	-2.27295e-05	-0.21637	1.96045e-05
-0.21393	-1.31134e-05	-0.21393	-2.14569e-05	-0.21393	2.16614e-05
-0.21149	-1.25854e-05	-0.21149	-2.03247e-05	-0.21149	2.36115e-05
-0.20905	-1.19995e-05	-0.20905	-1.91467e-05	-0.20905	2.57385e-05
-0.2066	-1.14227e-05	-0.2066	-1.79749e-05	-0.2066	2.79144e-05
-0.20416	-1.08154e-05	-0.20416	-1.67603e-05	-0.20416	3.02063e-05
-0.20172	-1.02661e-05	-0.20172	-1.56982e-05	-0.20172	3.23822e-05
-0.19928	-9.64661e-06	-0.19928	-1.45203e-05	-0.19928	3.47839e-05
-0.19684	-9.10034e-06	-0.19684	-1.34888e-05	-0.19684	3.70148e-05
-0.1944	-8.49915e-06	-0.1944	-1.23871e-05	-0.1944	3.94196e-05
-0.19196	-7.92542e-06	-0.19196	-1.13647e-05	-0.19196	4.17542e-05
-0.18951	-7.34253e-06	-0.18951	-1.03241e-05	-0.18951	4.41559e-05
-0.18707	-6.75964e-06	-0.18707	-9.31702e-06	-0.18707	4.6579e-05
-0.18463	-6.16455e-06	-0.18463	-8.28857e-06	-0.18463	4.90997e-05
-0.18219	-5.62439e-06	-0.18219	-7.38525e-06	-0.18219	5.14191e-05
-0.17975	-5.0415e-06	-0.17975	-6.39343e-06	-0.17975	5.39642e-05
-0.17731	-4.52423e-06	-0.17731	-5.55115e-06	-0.17731	5.62988e-05
-0.17487	-3.95325e-06	-0.17487	-4.60205e-06	-0.17487	5.88684e-05
-0.17242	-3.43933e-06	-0.17242	-3.7677e-06	-0.17242	6.12305e-05
-0.16998	-2.90955e-06	-0.16998	-2.88574e-06	-0.16998	6.35681e-05
-0.16754	-2.37274e-06	-0.16754	-1.98334e-06	-0.16754	6.60706e-05
-0.1651	-1.82495e-06	-0.1651	-1.01776e-06	-0.1651	6.86646e-05
-0.16266	-1.31439e-06	-0.16266	-1.33362e-07	-0.16266	7.10449e-05
-0.16022	-7.43408e-07	-0.16022	9.12781e-07	-0.16022	7.36694e-05
-0.15778	-2.02637e-07	-0.15778	1.88171e-06	-0.15778	7.60498e-05
-0.15533	3.89709e-07	-0.15533	2.98523e-06	-0.15533	7.85828e-05
-0.15289	9.91211e-07	-0.15289	4.08661e-06	-0.15289	8.10242e-05
-0.15045	1.64154e-06	-0.15045	5.25909e-06	-0.15045	8.35571e-05
-0.14801	2.31354e-06	-0.14801	6.4856e-06	-0.14801	8.60596e-05
-0.14557	3.03558e-06	-0.14557	7.79114e-06	-0.14557	8.87146e-05
-0.14313	3.71094e-06	-0.14313	8.98132e-06	-0.14313	9.11255e-05
-0.14069	4.47296e-06	-0.14069	1.03302e-05	-0.14069	9.3811e-05
-0.13824	5.17181e-06	-0.13824	1.15356e-05	-0.13824	9.62524e-05
-0.1358	5.95886e-06	-0.1358	1.29211e-05	-0.1358	9.89075e-05
-0.13336	6.6803e-06	-0.13336	1.41479e-05	-0.13336	0.000101318
-0.13092	7.4646e-06	-0.13092	1.5506e-05	-0.13092	0.000103882
-0.12848	8.25806e-06	-0.12848	1.68915e-05	-0.12848	0.000106476
-0.12604	9.10339e-06	-0.12604	1.84021e-05	-0.12604	0.000109161
-0.1236	9.8999e-06	-0.1236	1.9809e-05	-0.1236	0.000111603
-0.12115	1.08368e-05	-0.12115	2.14691e-05	-0.12115	0.00011438
-0.11871	1.17004e-05	-0.11871	2.2998e-05	-0.11871	0.000116699
-0.11627	1.26801e-05	-0.11627	2.47955e-05	-0.11627	0.000119415
-0.11383	1.36444e-05	-0.11383	2.65015e-05	-0.11383	0.000121948
-0.11139	1.46667e-05	-0.11139	2.83722e-05	-0.11139	0.000124634
-0.10895	1.57379e-05	-0.10895	3.02887e-05	-0.10895	0.000127319
-0.10651	1.68915e-05	-0.10651	3.2373e-05	-0.10651	0.000130157
-0.10406	1.80023e-05	-0.10406	3.4317e-05	-0.10406	0.000132751
-0.10162	1.92505e-05	-0.10162	3.65356e-05	-0.10162	0.000135651
-0.09918	2.04346e-05	-0.09918	3.85681e-05	-0.09918	0.000138306
-0.09674	2.17712e-05	-0.09674	4.08813e-05	-0.09674	0.000141296
-0.0943	2.30316e-05	-0.0943	4.30359e-05	-0.0943	0.000143982
-0.09186	2.43988e-05	-0.09186	4.534e-05	-0.09186	0.000146912
-0.08942	2.58118e-05	-0.08942	4.76868e-05	-0.08942	0.000149841
-0.08698	2.73102e-05	-0.08698	5.01923e-05	-0.08698	0.000152893
-0.08453	2.87262e-05	-0.08453	5.25024e-05	-0.08453	0.000155731
-0.08209	3.02887e-05	-0.08209	5.50903e-05	-0.08209	0.000158905
-0.07965	3.17657e-05	-0.07965	5.74707e-05	-0.07965	0.000161804
-0.07721	3.33527e-05	-0.07721	6.00433e-05	-0.07721	0.000164917
-0.07477	3.4906e-05	-0.07477	6.2439e-05	-0.07477	0.000167816
-0.07233	3.65051e-05	-0.07233	6.50635e-05	-0.07233	0.000170959
-0.06989	3.81134e-05	-0.06989	6.77185e-05	-0.06989	0.000174133
-0.06744	3.98132e-05	-0.06744	7.04956e-05	-0.06744	0.00017749
-0.065	4.13971e-05	-0.065	7.30591e-05	-0.065	0.000180542
-0.06256	4.31335e-05	-0.06256	7.59583e-05	-0.06256	0.000184021
-0.06012	4.47357e-05	-0.06012	7.86133e-05	-0.06012	0.000187164
-0.05768	4.646e-05	-0.05768	8.15735e-05	-0.05768	0.000190613
-0.05524	4.80255e-05	-0.05524	8.42896e-05	-0.05524	0.000193817
-0.0528	4.96826e-05	-0.0528	8.71887e-05	-0.0528	0.000197205
-0.05035	5.13214e-05	-0.05035	9.01489e-05	-0.05035	0.000200653
-0.04791	5.30151e-05	-0.04791	9.33228e-05	-0.04791	0.000204163
-0.04547	5.45654e-05	-0.04547	9.62524e-05	-0.04547	0.000207458
-0.04303	5.62439e-05	-0.04303	9.95483e-05	-0.04303	0.000211182
-0.04059	5.77454e-05	-0.04059	0.00010257	-0.04059	0.000214661
-0.03815	5.93262e-05	-0.03815	0.000105896	-0.03815	0.000218353
-0.03571	6.08124e-05	-0.03571	0.000109192	-0.03571	0.000222076
-0.03326	6.21948e-05	-0.03326	0.00011264	-0.03326	0.000225891
-0.03082	6.36902e-05	-0.03082	0.00011618	-0.03082	0.000229797
-0.02838	6.52161e-05	-0.02838	0.000119965	-0.02838	0.000234009
-0.02594	6.65283e-05	-0.02594	0.000123566	-0.02594	0.000237915
-0.0235	6.80237e-05	-0.0235	0.000127655	-0.0235	0.000242249
-0.02106	6.92749e-05	-0.02106	0.0001315	-0.02106	0.000246277
-0.01862	7.06482e-05	-0.01862	0.000135773	-0.01862	0.000250793
-0.01617	7.17773e-05	-0.01617	0.000139862	-0.01617	0.000255005
-0.01373	7.2998e-05	-0.01373	0.000144257	-0.01373	0.000259552
-0.01129	7.41882e-05	-0.01129	0.000148804	-0.01129	0.00026416
-0.00885	7.54395e-05	-0.00885	0.000153564	-0.00885	0.000269073
-0.00641	7.64465e-05	-0.00641	0.000158081	-0.00641	0.000273682
-0.00397	7.75757e-05	-0.00397	0.000163055	-0.00397	0.000278778
-0.00153	7.85522e-05	-0.00153	0.000167725	-0.00153	0.00028363
0.000915527	7.96509e-05	0.000915527	0.000172791	0.000915527	0.00028891
0.00336	8.06885e-05	0.00336	0.000177704	0.00336	0.000294037
0.0058	8.18176e-05	0.0058	0.000182739	0.0058	0.000299408
0.00824	8.29773e-05	0.00824	0.000187866	0.00824	0.00030481
0.01068	8.43506e-05	0.01068	0.000193176	0.01068	0.000310577
0.01312	8.56628e-05	0.01312	0.000198151	0.01312	0.00031601
0.01556	8.73108e-05	0.01556	0.000203491	0.01556	0.000321808
0.01801	8.89587e-05	0.01801	0.000208496	0.01801	0.000327423
0.02045	9.1095e-05	0.02045	0.000213867	0.02045	0.000333374
0.02289	9.32312e-05	0.02289	0.000218872	0.02289	0.000338867
0.02533	9.57336e-05	0.02533	0.000224091	0.02533	0.000344666
0.02777	9.84802e-05	0.02777	0.000229218	0.02777	0.000350342
0.03021	0.000101593	0.03021	0.000234589	0.03021	0.000356201
0.03265	0.000104675	0.03265	0.000239594	0.03265	0.000361511
0.0351	0.000108276	0.0351	0.000244965	0.0351	0.000366974
0.03754	0.000111816	0.03754	0.000249939	0.03754	0.000372131
0.03998	0.000115662	0.03998	0.000255157	0.03998	0.000377167
0.04242	0.000119598	0.04242	0.000260284	0.04242	0.000382019
0.04486	0.00012381	0.04486	0.000265533	0.04486	0.000387115
0.0473	0.000128113	0.0473	0.000270813	0.0473	0.00039212
0.04974	0.000132721	0.04974	0.000276337	0.04974	0.000397369
0.05219	0.000137115	0.05219	0.000281494	0.05219	0.000399628
0.05463	0.000141968	0.05463	0.000287109	0.05463	0.000404755
0.05707	0.000146606	0.05707	0.000292358	0.05707	0.000409363
0.05951	0.000151642	0.05951	0.000298157	0.05951	0.000414429
0.06195	0.000156403	0.06195	0.000303558	0.06195	0.000418762
0.06439	0.000161377	0.06439	0.000309296	0.06439	0.000422485
0.06683	0.000166351	0.06683	0.000315155	0.06683	0.000427185
0.06927	0.000171539	0.06927	0.00032132	0.06927	0.000432587
0.07172	0.000176361	0.07172	0.000327209	0.07172	0.000437592
0.07416	0.000181549	0.07416	0.000333679	0.07416	0.000443207
0.0766	0.000186401	0.0766	0.000339752	0.0766	0.000448364
0.07904	0.000191711	0.07904	0.000346588	0.07904	0.000454224
0.08148	0.000196655	0.08148	0.000353088	0.08148	0.000459869
0.08392	0.000201782	0.08392	0.000359924	0.08392	0.000465546
0.08636	0.00020694	0.08636	0.000366913	0.08636	0.000470917
0.08881	0.00021228	0.08881	0.000374329	0.08881	0.000476868
0.09125	0.000217224	0.09125	0.000381409	0.09125	0.00048291
0.09369	0.000222626	0.09369	0.000389191	0.09369	0.000489563
0.09613	0.0002276	0.09613	0.000396637	0.09613	0.000495758
0.09857	0.000233063	0.09857	0.000404816	0.09857	0.00050293
0.10101	0.00023819	0.10101	0.000412659	0.10101	0.000509491
0.10345	0.000243439	0.10345	0.00042099	0.10345	0.000516632
0.1059	0.000248779	0.1059	0.000429565	0.1059	0.000523315
0.10834	0.000254364	0.10834	0.00043866	0.10834	0.000530884
0.11078	0.000259644	0.11078	0.000447357	0.11078	0.000538055
0.11322	0.00026535	0.11322	0.000457001	0.11322	0.000545959
0.11566	0.000270721	0.11566	0.000466217	0.11566	0.000553101
0.1181	0.000276489	0.1181	0.000476105	0.1181	0.000560852
0.12054	0.000282166	0.12054	0.000485931	0.12054	0.000568573
0.12299	0.000288086	0.12299	0.000496216	0.12299	0.000576691
0.12543	0.000294037	0.12543	0.000506714	0.12543	0.000584869
0.12787	0.000300415	0.12787	0.000517853	0.12787	0.000593475
0.13031	0.000306396	0.13031	0.000528564	0.13031	0.000601563
0.13275	0.00031308	0.13275	0.000540161	0.13275	0.000610657
0.13519	0.000319397	0.13519	0.000551392	0.13519	0.000619202
0.13763	0.000326355	0.13763	0.000563446	0.13763	0.000628052
0.14008	0.000333038	0.14008	0.000575104	0.14008	0.000636597
0.14252	0.000340179	0.14252	0.000587372	0.14252	0.000645447
0.14496	0.000347565	0.14496	0.000599823	0.14496	0.000654602
0.1474	0.000355438	0.1474	0.000612885	0.1474	0.000663757
0.14984	0.000363098	0.14984	0.00062561	0.14984	0.000672607
0.15228	0.000371521	0.15228	0.000639343	0.15228	0.000681763
0.15472	0.00037973	0.15472	0.000652161	0.15472	0.000690613
0.15717	0.000388672	0.15717	0.000665894	0.15717	0.000699463
0.15961	0.000397766	0.15961	0.000679626	0.15961	0.000708008
0.16205	0.000407288	0.16205	0.000693665	0.16205	0.000717163
0.16449	0.000417267	0.16449	0.000707703	0.16449	0.000725708
0.16693	0.00042807	0.16693	0.000722656	0.16693	0.000734863
0.16937	0.000438629	0.16937	0.000736694	0.16937	0.000743408
0.17181	0.000450256	0.17181	0.000751953	0.17181	0.000752563
0.17426	0.000461639	0.17426	0.000766602	0.17426	0.000760803
0.1767	0.000474091	0.1767	0.000782166	0.1767	0.000769958
0.17914	0.00048642	0.17914	0.000797119	0.17914	0.000778198
0.18158	0.00049939	0.18158	0.000812683	0.18158	0.000786133
0.18402	0.000512756	0.18402	0.000828247	0.18402	0.000794373
0.18646	0.000526886	0.18646	0.000844727	0.18646	0.000802917
0.1889	0.00054068	0.1889	0.000860291	0.1889	0.000810547
0.19135	0.000555237	0.19135	0.00087677	0.19135	0.000818787
0.19379	0.000569336	0.19379	0.000892639	0.19379	0.000825806
0.19623	0.000584076	0.19623	0.000909424	0.19623	0.000833435
0.19867	0.000598511	0.19867	0.000925903	0.19867	0.000840149
0.20111	0.000613098	0.20111	0.000942688	0.20111	0.000846863
0.20355	0.000627747	0.20355	0.000959167	0.20355	0.000852966
0.20599	0.000641785	0.20599	0.000976563	0.20599	0.000858765
0.20844	0.000654602	0.20844	0.000993042	0.20844	0.000863647
0.21088	0.000666809	0.21088	0.00101	0.21088	0.000868835
0.21332	0.000677185	0.21332	0.00103	0.21332	0.000872498
0.21576	0.000686035	0.21576	0.00104	0.21576	0.00087616
0.2182	0.000692139	0.2182	0.00106	0.2182	0.000878296
0.22064	0.00069519	0.22064	0.00108	0.22064	0.000879517
0.22308	0.00069397	0.22308	0.0011	0.22308	0.000880432
0.22552	0.000688171	0.22552	0.00111	0.22552	0.000878601
0.22797	0.000675049	0.22797	0.00113	0.22797	0.000876465
0.23041	0.000655823	0.23041	0.00115	0.23041	0.000874023
0.23285	0.000629578	0.23285	0.00116	0.23285	0.000869751
0.23529	0.000600281	0.23529	0.00118	0.23529	0.000863953
0.23773	0.000570374	0.23773	0.00119	0.23773	0.000856018
0.24017	0.000543213	0.24017	0.00121	0.24017	0.000845947
0.24261	0.00052002	0.24261	0.00122	0.24261	0.00083252
0.24506	0.000500793	0.24506	0.00123	0.24506	0.00081665
0.2475	0.000483978	0.2475	0.00124	0.2475	0.000796814
0.24994	0.000468323	0.24994	0.00124	0.24994	0.000775146
0.25238	0.000453064	0.25238	0.00125	0.25238	0.000750732
0.25482	0.000438599	0.25482	0.00125	0.25482	0.000726624
0.25726	0.000424286	0.25726	0.00124	0.25726	0.00070343
0.2597	0.00040979	0.2597	0.00122	0.2597	0.000682373
0.26215	0.000396179	0.26215	0.0012	0.26215	0.000663147
0.26459	0.000382904	0.26459	0.00116	0.26459	0.000646057
0.26703	0.000369904	0.26703	0.00111	0.26703	0.000629578
0.26947	0.000357574	0.26947	0.00106	0.26947	0.000613708
0.27191	0.000345856	0.27191	0.00101	0.27191	0.000597839
0.27435	0.000334808	0.27435	0.000964966	0.27435	0.000582275
0.27679	0.00032428	0.27679	0.000920105	0.27679	0.000566711
0.27924	0.000314148	0.27924	0.000879211	0.27924	0.000552063
0.28168	0.000304565	0.28168	0.000843201	0.28168	0.00053772
0.28412	0.000295654	0.28412	0.000811157	0.28412	0.000524597
0.28656	0.000287018	0.28656	0.00078186	0.28656	0.000511475
0.289	0.000278961	0.289	0.000753479	0.289	0.000499268
0.29144	0.00027124	0.29144	0.000725403	0.29144	0.000484802
0.29388	0.000264069	0.29388	0.000699158	0.29388	0.000472015
0.29633	0.000257141	0.29633	0.000675354	0.29633	0.000459869
0.29877	0.00025058	0.29877	0.000655823	0.29877	0.000448364
0.30121	0.000244415	0.30121	0.000639038	0.30121	0.000437134
0.30365	0.000238586	0.30365	0.000624084	0.30365	0.00042807
0.30609	0.00023291	0.30609	0.000610046	0.30609	0.000419556
0.30853	0.000227631	0.30853	0.000597839	0.30853	0.000411896
0.31097	0.000222534	0.31097	0.000586243	0.31097	0.000404205
0.31342	0.000217773	0.31342	0.000576477	0.31342	0.000396576
0.31586	0.000213257	0.31586	0.000567322	0.31586	0.000388672
0.3183	0.000209015	0.3183	0.000558777	0.3183	0.000380859
0.32074	0.000205109	0.32074	0.000550537	0.32074	0.000373566
0.32318	0.000201324	0.32318	0.000542603	0.32318	0.000366211
0.32562	0.00019754	0.32562	0.000534363	0.32562	0.000358856
0.32806	0.000193939	0.32806	0.000526123	0.32806	0.000351868
0.33051	0.000190491	0.33051	0.000517273	0.33051	0.000345093
0.33295	0.000187256	0.33295	0.000508118	0.33295	0.000338562
0.33539	0.000184082	0.33539	0.000498047	0.33539	0.000332184
0.33783	0.000181152	0.33783	0.000487793	0.33783	0.000323822
0.34027	0.000178436	0.34027	0.000476776	0.34027	0.000318237
0.34271	0.000175751	0.34271	0.000465668	0.34271	0.000314178
0.34515	0.000173126	0.34515	0.000454773	0.34515	0.000310425
0.3476	0.000170715	0.3476	0.000444275	0.3476	0.000307312
0.35004	0.000168304	0.35004	0.00043512	0.35004	0.000304382
0.35248	0.000166046	0.35248	0.000427307	0.35248	0.00030191
0.35492	0.00016391	0.35492	0.000420685	0.35492	0.000299744
0.35736	0.000161743	0.35736	0.000415253	0.35736	0.00029776
0.3598	0.000159698	0.3598	0.000410736	0.3598	0.00029599
0.36224	0.000157776	0.36224	0.000406982	0.36224	0.000294373
0.36469	0.000155823	0.36469	0.000403442	0.36469	0.000292786
0.36713	0.000153961	0.36713	0.000400421	0.36713	0.000291595
0.36957	0.00015213	0.36957	0.000397614	0.36957	0.000290253
0.37201	0.000150421	0.37201	0.000395142	0.37201	0.000289185
0.37445	0.000148743	0.37445	0.000392517	0.37445	0.000287933
0.37689	0.000147217	0.37689	0.000390228	0.37689	0.000286896
0.37933	0.00014566	0.37933	0.000388	0.37933	0.000285675
0.38177	0.000144196	0.38177	0.000386017	0.38177	0.00028479
0.38422	0.000142639	0.38422	0.000383789	0.38422	0.000283783
0.38666	0.000141144	0.38666	0.000381989	0.38666	0.000282806
0.3891	0.000139679	0.3891	0.000379974	0.3891	0.00028183
0.39154	0.000138306	0.39154	0.000378235	0.39154	0.000280731
0.39398	0.000136932	0.39398	0.000376434	0.39398	0.000279755
0.39642	0.000135651	0.39642	0.000374756	0.39642	0.000278809
0.39886	0.000134369	0.39886	0.000373138	0.39886	0.000277985
0.40131	0.000133148	0.40131	0.000371643	0.40131	0.000277069
0.40375	0.000131989	0.40375	0.000370087	0.40375	0.00027594
0.40619	0.00013089	0.40619	0.000368744	0.40619	0.000275146
0.40863	0.000129791	0.40863	0.000367218	0.40863	0.000274384
0.41107	0.000128723	0.41107	0.000365906	0.41107	0.000273407
0.41351	0.000127655	0.41351	0.000364532	0.41351	0.000272522
0.41595	0.000126587	0.41595	0.000363312	0.41595	0.000271851
0.4184	0.00012558	0.4184	0.000362122	0.4184	0.000271088
0.42084	0.000124603	0.42084	0.000361023	0.42084	0.000270447
0.42328	0.000123627	0.42328	0.00035965	0.42328	0.000269592
0.42572	0.000122681	0.42572	0.000358551	0.42572	0.000268951
0.42816	0.000121735	0.42816	0.000357422	0.42816	0.000268097
0.4306	0.000120819	0.4306	0.000356384	0.4306	0.000267487
0.43304	0.000119965	0.43304	0.000355408	0.43304	0.000266571
0.43549	0.00011908	0.43549	0.000354462	0.43549	0.000265839
0.43793	0.000118286	0.43793	0.000353577	0.43793	0.000264954
0.44037	0.000117523	0.44037	0.000352814	0.44037	0.00026416
0.44281	0.00011673	0.44281	0.000351776	0.44281	0.000263367
0.44525	0.000116028	0.44525	0.000351105	0.44525	0.000262512
0.44769	0.000115265	0.44769	0.00035025	0.44769	0.000261719
0.45013	0.000114563	0.45013	0.000349579	0.45013	0.000260925
0.45258	0.000113831	0.45258	0.000348785	0.45258	0.000260132
0.45502	0.00011319	0.45502	0.000348145	0.45502	0.000259186
0.45746	0.000112579	0.45746	0.000347534	0.45746	0.000258423
0.4599	0.000111938	0.4599	0.000346924	0.4599	0.000257629
0.46234	0.000111298	0.46234	0.0003461	0.46234	0.000256805
0.46478	0.000110718	0.46478	0.000345551	0.46478	0.000256104
0.46722	0.000110107	0.46722	0.000344788	0.46722	0.00025528
0.46967	0.000109528	0.46967	0.000344208	0.46967	0.000254486
0.47211	0.000109009	0.47211	0.000343567	0.47211	0.00025351
0.47455	0.000108459	0.47455	0.000342987	0.47455	0.000252594
0.47699	0.00010791	0.47699	0.000342468	0.47699	0.000251801
0.47943	0.000107361	0.47943	0.00034198	0.47943	0.000251129
0.48187	0.000106812	0.48187	0.000341339	0.48187	0.000250397
0.48431	0.000106323	0.48431	0.000340912	0.48431	0.000249878
0.48676	0.000105804	0.48676	0.000340332	0.48676	0.000249115
0.4892	0.000105316	0.4892	0.000339996	0.4892	0.000248444
0.49164	0.000104858	0.49164	0.000339355	0.49164	0.000247711
0.49408	0.000104401	0.49408	0.000338806	0.49408	0.00024707
0.49652	0.000103943	0.49652	0.000338104	0.49652	0.000246307
0.49896	0.000103546	0.49896	0.000337616	0.49896	0.000245697
0.5014	0.00010318	0.5014	0.000336914	0.5014	0.000244965
0.50385	0.000102814	0.50385	0.000336334	0.50385	0.000244293
0.50629	0.000102417	0.50629	0.000335632	0.50629	0.000243805
0.50873	0.000102081	0.50873	0.000335083	0.50873	0.000243256
0.51117	0.000101715	0.51117	0.000334198	0.51117	0.000242767
0.51361	0.000101349	0.51361	0.000333527	0.51361	0.000242188
0.51605	0.000100983	0.51605	0.000332703	0.51605	0.000241547
0.51849	0.000100647	0.51849	0.00033194	0.51849	0.000240936
0.52094	0.000100311	0.52094	0.000331055	0.52094	0.000240326
0.52338	0.000100006	0.52338	0.000330261	0.52338	0.000239777
0.52582	9.97009e-05	0.52582	0.000329346	0.52582	0.000239197
0.52826	9.94263e-05	0.52826	0.000328461	0.52826	0.000238373
0.5307	9.91211e-05	0.5307	0.000327545	0.5307	0.000237793
0.53314	9.88464e-05	0.53314	0.000326782	0.53314	0.000237396
0.53558	9.85107e-05	0.53558	0.000325745	0.53558	0.000236908
0.53802	9.82056e-05	0.53802	0.00032489	0.53802	0.000236389
0.54047	9.79004e-05	0.54047	0.00032373	0.54047	0.00023587
0.54291	9.76257e-05	0.54291	0.000322632	0.54291	0.000235443
0.54535	9.73206e-05	0.54535	0.000321472	0.54535	0.000234985
0.54779	9.70154e-05	0.54779	0.000320496	0.54779	0.000234558
0.55023	9.67712e-05	0.55023	0.00031958	0.55023	0.000234192
0.55267	9.64966e-05	0.55267	0.000318512	0.55267	0.000233734
0.55511	9.61914e-05	0.55511	0.000317383	0.55511	0.000233337
0.55756	9.59167e-05	0.55756	0.000316315	0.55756	0.000233032
0.56	9.56421e-05	0.56	0.000315094	0.56	0.000232605
0.56244	9.54285e-05	0.56244	0.000313995	0.56244	0.000232208
0.56488	9.51843e-05	0.56488	0.000312805	0.56488	0.000231812
0.56732	9.50012e-05	0.56732	0.000311554	0.56732	0.000231476
0.56976	9.48181e-05	0.56976	0.000310333	0.56976	0.000231018
0.5722	9.4635e-05	0.5722	0.000309235	0.5722	0.000230621
0.57465	9.44824e-05	0.57465	0.000308136	0.57465	0.000230255
0.57709	9.43604e-05	0.57709	0.000307068	0.57709	0.000229858
0.57953	9.42078e-05	0.57953	0.000305939	0.57953	0.000229431
0.58197	9.41162e-05	0.58197	0.000304932	0.58197	0.000229126
0.58441	9.39636e-05	0.58441	0.000303772	0.58441	0.000228729
0.58685	9.3811e-05	0.58685	0.000302734	0.58685	0.000228577
0.58929	9.3689e-05	0.58929	0.000301575	0.58929	0.000228241
0.59174	9.35974e-05	0.59174	0.000300537	0.59174	0.000227875
0.59418	9.35364e-05	0.59418	0.000299408	0.59418	0.00022757
0.59662	9.35059e-05	0.59662	0.00029834	0.59662	0.000227386
0.59906	9.34448e-05	0.59906	0.000297302	0.59906	0.000227112
0.6015	9.34753e-05	0.6015	0.000296387	0.6015	0.000226929
0.60394	9.34753e-05	0.60394	0.000295349	0.60394	0.000226685
0.60638	9.35364e-05	0.60638	0.000294403	0.60638	0.00022644
0.60883	9.35974e-05	0.60883	0.000293427	0.60883	0.000226257
0.61127	9.3689e-05	0.61127	0.000292572	0.61127	0.000226013
0.61371	9.3811e-05	0.61371	0.000291687	0.61371	0.0002258
0.61615	9.39941e-05	0.61615	0.000291046	0.61615	0.000225708
0.61859	9.41772e-05	0.61859	0.000290283	0.61859	0.000225555
0.62103	9.44519e-05	0.62103	0.000289642	0.62103	0.000225494
0.62347	9.4696e-05	0.62347	0.00028891	0.62347	0.000225403
0.62592	9.50317e-05	0.62592	0.000288361	0.62592	0.000225464
0.62836	9.53979e-05	0.62836	0.000287811	0.62836	0.000225494
0.6308	9.58252e-05	0.6308	0.000287415	0.6308	0.000225586
0.63324	9.63135e-05	0.63324	0.00028717	0.63324	0.000225769
0.63568	9.68628e-05	0.63568	0.000286987	0.63568	0.000225952
0.63812	9.74121e-05	0.63812	0.000286743	0.63812	0.000226105
0.64056	9.8114e-05	0.64056	0.000286743	0.64056	0.00022644
0.64301	9.87854e-05	0.64301	0.000286713	0.64301	0.000226776
0.64545	9.95789e-05	0.64545	0.000286926	0.64545	0.000227203
0.64789	0.000100403	0.64789	0.00028714	0.64789	0.00022757
0.65033	0.000101318	0.65033	0.000287567	0.65033	0.000228088
0.65277	0.000102295	0.65277	0.000288025	0.65277	0.000228729
0.65521	0.000103394	0.65521	0.000288696	0.65521	0.000229431
0.65765	0.000104523	0.65765	0.000289459	0.65765	0.000230133
0.6601	0.000105774	0.6601	0.000290466	0.6601	0.000231079
0.66254	0.000107056	0.66254	0.000291565	0.66254	0.000231934
0.66498	0.000108459	0.66498	0.000292847	0.66498	0.000233032
0.66742	0.000109985	0.66742	0.00029422	0.66742	0.000234222
0.66986	0.000111603	0.66986	0.000295807	0.66986	0.000235474
0.6723	0.000113312	0.6723	0.000297607	0.6723	0.000236816
0.67474	0.000115173	0.67474	0.000299622	0.67474	0.000238342
0.67719	0.000117035	0.67719	0.000301636	0.67719	0.000239929
0.67963	0.00011911	0.67963	0.000304047	0.67963	0.00024176
0.68207	0.000121216	0.68207	0.000306458	0.68207	0.000243683
0.68451	0.000123474	0.68451	0.000309265	0.68451	0.000245819
0.68695	0.000125732	0.68695	0.000312134	0.68695	0.000247772
0.68939	0.000128204	0.68939	0.000315216	0.68939	0.000250153
0.69183	0.000130768	0.69183	0.000318542	0.69183	0.000252686
0.69427	0.000133484	0.69427	0.000322205	0.69427	0.000255493
0.69672	0.0001362	0.69672	0.000325867	0.69672	0.000258148
0.69916	0.00013916	0.69916	0.000329956	0.69916	0.0002612
0.7016	0.00014212	0.7016	0.000334106	0.7016	0.000264282
0.70404	0.000145325	0.70404	0.000338684	0.70404	0.000267609
0.70648	0.000148468	0.70648	0.000343414	0.70648	0.000271118
0.70892	0.000151825	0.70892	0.00034845	0.70892	0.000274872
0.71136	0.000155243	0.71136	0.000353668	0.71136	0.000278625
0.71381	0.000158813	0.71381	0.000359253	0.71381	0.000282684
0.71625	0.000162476	0.71625	0.000364838	0.71625	0.000286774
0.71869	0.000166351	0.71869	0.000370819	0.71869	0.000291321
0.72113	0.000170166	0.72113	0.000376862	0.72113	0.000295898
0.72357	0.000174194	0.72357	0.000383362	0.72357	0.000300751
0.72601	0.000178162	0.72601	0.000389923	0.72601	0.000305359
0.72845	0.000182312	0.72845	0.000396851	0.72845	0.000310455
0.7309	0.000186584	0.7309	0.000404083	0.7309	0.000315643
0.73334	0.000191071	0.73334	0.000411682	0.73334	0.000321289
0.73578	0.000195496	0.73578	0.000419281	0.73578	0.000327118
0.73822	0.000200226	0.73822	0.000427399	0.73822	0.000333038
0.74066	0.000204803	0.74066	0.000435577	0.74066	0.000338898
0.7431	0.000209686	0.7431	0.000444153	0.7431	0.000345367
0.74554	0.000214508	0.74554	0.00045285	0.74554	0.000351471
0.74799	0.000219666	0.74799	0.000461731	0.74799	0.000357819
0.75043	0.000224823	0.75043	0.000471039	0.75043	0.000364471
0.75287	0.000230072	0.75287	0.000480682	0.75287	0.000372681
0.75531	0.000235352	0.75531	0.000490265	0.75531	0.000379791
0.75775	0.000240906	0.75775	0.000500519	0.75775	0.000387268
0.76019	0.000246277	0.76019	0.00051062	0.76019	0.000394623
0.76263	0.000252014	0.76263	0.000521362	0.76263	0.000402161
0.76508	0.000257721	0.76508	0.000531921	0.76508	0.00040976
0.76752	0.00026413	0.76752	0.000542816	0.76752	0.000417267
0.76996	0.000269867	0.76996	0.000554077	0.76996	0.000424988
0.7724	0.000275909	0.7724	0.000565735	0.7724	0.000432953
0.77484	0.00028186	0.77484	0.000577393	0.77484	0.000441193
0.77728	0.000288208	0.77728	0.0005896	0.77728	0.000449799
0.77972	0.000294647	0.77972	0.000601746	0.77972	0.000457916
0.78217	0.000301117	0.78217	0.000614624	0.78217	0.000466187
0.78461	0.000307587	0.78461	0.000627441	0.78461	0.000474762
0.78705	0.000314636	0.78705	0.000640564	0.78705	0.000484222
0.78949	0.000321289	0.78949	0.000653992	0.78949	0.000493561
0.79193	0.000328186	0.79193	0.000668945	0.79193	0.000502258
0.79437	0.000335632	0.79437	0.000682983	0.79437	0.000510925
0.79681	0.00034256	0.79681	0.000697632	0.79681	0.000519806
0.79926	0.000349304	0.79926	0.000711365	0.79926	0.000528412
0.8017	0.000356537	0.8017	0.000726013	0.8017	0.000538025
0.80414	0.000363617	0.80414	0.000740662	0.80414	0.000548676
0.80658	0.000370697	0.80658	0.00075531	0.80658	0.000558502
0.80902	0.000378174	0.80902	0.000770569	0.80902	0.000568542
0.81146	0.000385895	0.81146	0.000785828	0.81146	0.000578522
0.8139	0.000393402	0.8139	0.000801086	0.8139	0.000589752
0.81635	0.000401917	0.81635	0.000816956	0.81635	0.000601776
0.81879	0.000409668	0.81879	0.000832214	0.81879	0.000612183
0.82123	0.000417603	0.82123	0.000848083	0.82123	0.00062439
0.82367	0.000425354	0.82367	0.000864258	0.82367	0.000635681
0.82611	0.000433105	0.82611	0.000880127	0.82611	0.000647278
0.82855	0.000441162	0.82855	0.000898743	0.82855	0.000661316
0.83099	0.000449371	0.83099	0.000918274	0.83099	0.000671692
0.83344	0.000458038	0.83344	0.000934448	0.83344	0.000681458
0.83588	0.000466553	0.83588	0.000953369	0.83588	0.000691528
0.83832	0.000475067	0.83832	0.000971985	0.83832	0.000702515
0.84076	0.000483734	0.84076	0.00098938	0.84076	0.000712585
0.8432	0.000492035	0.8432	0.00101	0.8432	0.000722656
0.84564	0.000500702	0.84564	0.00102	0.84564	0.000733948
0.84808	0.000510071	0.84808	0.00104	0.84808	0.000747681
0.85052	0.000519135	0.85052	0.00105	0.85052	0.000759277
0.85297	0.00052771	0.85297	0.00107	0.85297	0.000772095
0.85541	0.00053656	0.85541	0.00109	0.85541	0.000784912
0.85785	0.000545319	0.85785	0.0011	0.85785	0.00079895
0.86029	0.000555267	0.86029	0.00112	0.86029	0.000808716
0.86273	0.000565399	0.86273	0.00114	0.86273	0.000818176
0.86517	0.00057547	0.86517	0.00116	0.86517	0.000828857
0.86761	0.0005849	0.86761	0.00117	0.86761	0.000839844
0.87006	0.000594666	0.87006	0.00119	0.87006	0.00085144
0.8725	0.000604034	0.8725	0.00121	0.8725	0.000861816
0.87494	0.000614624	0.87494	0.00122	0.87494	0.000875244
0.87738	0.000624084	0.87738	0.00124	0.87738	0.000889282
0.87982	0.00063385	0.87982	0.00125	0.87982	0.000903625
0.88226	0.000643311	0.88226	0.00127	0.88226	0.000917358
0.8847	0.000653076	0.8847	0.00129	0.8847	0.00092865
0.88715	0.000662842	0.88715	0.0013	0.88715	0.000941772
0.88959	0.000674133	0.88959	0.00132	0.88959	0.00095459
0.89203	0.000683899	0.89203	0.00134	0.89203	0.000967102
0.89447	0.000693665	0.89447	0.00135	0.89447	0.000979309
0.89691	0.000703125	0.89691	0.00137	0.89691	0.000994263
0.89935	0.000712891	0.89935	0.00139	0.89935	0.00101
0.90179	0.000722656	0.90179	0.0014	0.90179	0.00103
0.90424	0.000732117	0.90424	0.00142	0.90424	0.00106
0.90668	0.000740662	0.90668	0.00144	0.90668	0.00108
0.90912	0.000749512	0.90912	0.00146	0.90912	0.00109
0.91156	0.000759277	0.91156	0.00148	0.91156	0.00111
0.914	0.000768738	0.914	0.0015	0.914	0.00113
0.91644	0.000777588	0.91644	0.00152	0.91644	0.00114
0.91888	0.000786438	0.91888	0.00154	0.91888	0.00115
0.92133	0.000794373	0.92133	0.00155	0.92133	0.00116
0.92377	0.000803223	0.92377	0.00157	0.92377	0.00118
0.92621	0.000811768	0.92621	0.00158	0.92621	0.00119
0.92865	0.000820007	0.92865	0.00159	0.92865	0.0012
0.93109	0.000829163	0.93109	0.00161	0.93109	0.00121
0.93353	0.000838013	0.93353	0.00162	0.93353	0.00122
0.93597	0.000845947	0.93597	0.00163	0.93597	0.00123
0.93842	0.000854187	0.93842	0.00164	0.93842	0.00124
0.94086	0.000861816	0.94086	0.00166	0.94086	0.00124
0.9433	0.000869446	0.9433	0.00167	0.9433	0.00125
0.94574	0.000877991	0.94574	0.00168	0.94574	0.00126
0.94818	0.000885315	0.94818	0.00169	0.94818	0.00127
0.95062	0.00089325	0.95062	0.0017	0.95062	0.00127
0.95306	0.000900574	0.95306	0.0017	0.95306	0.00127
0.95551	0.000906982	0.95551	0.00171	0.95551	0.00128
0.95795	0.000914612	0.95795	0.00172	0.95795	0.00129
0.96039	0.000922241	0.96039	0.00172	0.96039	0.00129
0.96283	0.000931091	0.96283	0.00173	0.96283	0.00129
0.96527	0.000939026	0.96527	0.00174	0.96527	0.0013
0.96771	0.000947876	0.96771	0.00174	0.96771	0.00131
0.97015	0.000954895	0.97015	0.00175	0.97015	0.00132
0.9726	0.000962524	0.9726	0.00176	0.9726	0.00133
0.97504	0.000971375	0.97504	0.00177	0.97504	0.00133
0.97748	0.000979004	0.97748	0.00177	0.97748	0.00133
0.97992	0.000986328	0.97992	0.00178	0.97992	0.00134
0.98236	0.000993042	0.98236	0.00178	0.98236	0.00133
0.9848	0.001	0.9848	0.00179	0.9848	0.00133
0.98724	0.00101	0.98724	0.00179	0.98724	0.00133
0.98969	0.00101	0.98969	0.0018	0.98969	0.00132
0.99213	0.00102	0.99213	0.0018	0.99213	0.00131
0.99457	0.00103	0.99457	0.00181	0.99457	0.0013
0.99701	0.00103	0.99701	0.00181	0.99701	0.00131
0.99945	0.00104	0.99945	0.00181	0.99945	0.0013
1.00189	0.00104	1.00189	0.00181	1.00189	0.00128

## Sheet: Figure 5 (d)
-0.99762	-0.0045	-0.99762	-0.01	-0.99762	-0.00522
-0.99518	-0.00263	-0.99518	-0.00919	-0.99518	-0.0037
-0.99274	-0.00236	-0.99274	-0.008	-0.99274	-0.00324
-0.9903	-0.00217	-0.9903	-0.00717	-0.9903	-0.00294
-0.98785	-0.00199	-0.98785	-0.00652	-0.98785	-0.00267
-0.98541	-0.00182	-0.98541	-0.00595	-0.98541	-0.00245
-0.98297	-0.00168	-0.98297	-0.00534	-0.98297	-0.00227
-0.98053	-0.00156	-0.98053	-0.00451	-0.98053	-0.00212
-0.97809	-0.00147	-0.97809	-0.00343	-0.97809	-0.00199
-0.97565	-0.00139	-0.97565	-0.00301	-0.97565	-0.00188
-0.97321	-0.00133	-0.97321	-0.00288	-0.97321	-0.00179
-0.97076	-0.00127	-0.97076	-0.00278	-0.97076	-0.00171
-0.96832	-0.00122	-0.96832	-0.00268	-0.96832	-0.00163
-0.96588	-0.00118	-0.96588	-0.00257	-0.96588	-0.00157
-0.96344	-0.00114	-0.96344	-0.00246	-0.96344	-0.00151
-0.961	-0.00111	-0.961	-0.00234	-0.961	-0.00145
-0.95856	-0.00108	-0.95856	-0.00221	-0.95856	-0.0014
-0.95612	-0.00105	-0.95612	-0.00209	-0.95612	-0.00136
-0.95367	-0.00102	-0.95367	-0.00197	-0.95367	-0.00132
-0.95123	-0.000995178	-0.95123	-0.00186	-0.95123	-0.00128
-0.94879	-0.000971069	-0.94879	-0.00176	-0.94879	-0.00124
-0.94635	-0.000948181	-0.94635	-0.00166	-0.94635	-0.00121
-0.94391	-0.000926514	-0.94391	-0.00157	-0.94391	-0.00118
-0.94147	-0.000905762	-0.94147	-0.00149	-0.94147	-0.00115
-0.93903	-0.000885925	-0.93903	-0.00141	-0.93903	-0.00112
-0.93658	-0.000866699	-0.93658	-0.00134	-0.93658	-0.00109
-0.93414	-0.000848999	-0.93414	-0.00128	-0.93414	-0.00107
-0.9317	-0.000831604	-0.9317	-0.00122	-0.9317	-0.00104
-0.92926	-0.000814819	-0.92926	-0.00117	-0.92926	-0.00102
-0.92682	-0.000798645	-0.92682	-0.00112	-0.92682	-0.000999146
-0.92438	-0.000783081	-0.92438	-0.00107	-0.92438	-0.000978699
-0.92194	-0.000768127	-0.92194	-0.00103	-0.92194	-0.000958557
-0.91949	-0.000753479	-0.91949	-0.000999756	-0.91949	-0.000939636
-0.91705	-0.000739136	-0.91705	-0.000968628	-0.91705	-0.000921326
-0.91461	-0.000725708	-0.91461	-0.000942078	-0.91461	-0.000903625
-0.91217	-0.000712585	-0.91217	-0.000923157	-0.91217	-0.000887146
-0.90973	-0.000699768	-0.90973	-0.000901794	-0.90973	-0.000870972
-0.90729	-0.000687256	-0.90729	-0.000884399	-0.90729	-0.000855713
-0.90485	-0.000675049	-0.90485	-0.000870667	-0.90485	-0.000840454
-0.9024	-0.000662537	-0.9024	-0.000858459	-0.9024	-0.000825806
-0.89996	-0.000651245	-0.89996	-0.000847168	-0.89996	-0.000811768
-0.89752	-0.000639343	-0.89752	-0.000839233	-0.89752	-0.00079834
-0.89508	-0.000628357	-0.89508	-0.000829163	-0.89508	-0.000787964
-0.89264	-0.000617371	-0.89264	-0.000827637	-0.89264	-0.000774841
-0.8902	-0.000606689	-0.8902	-0.000823364	-0.8902	-0.000760803
-0.88776	-0.000596008	-0.88776	-0.000807495	-0.88776	-0.000748291
-0.88531	-0.000585632	-0.88531	-0.000796204	-0.88531	-0.000735779
-0.88287	-0.000575562	-0.88287	-0.000784912	-0.88287	-0.000724182
-0.88043	-0.000565491	-0.88043	-0.000773926	-0.88043	-0.000712891
-0.87799	-0.000555725	-0.87799	-0.000762939	-0.87799	-0.000701599
-0.87555	-0.00054657	-0.87555	-0.000752258	-0.87555	-0.000690918
-0.87311	-0.00053772	-0.87311	-0.000742188	-0.87311	-0.000680542
-0.87067	-0.000529175	-0.87067	-0.000731812	-0.87067	-0.000670166
-0.86823	-0.000520325	-0.86823	-0.000721436	-0.86823	-0.00065979
-0.86578	-0.00051178	-0.86578	-0.00071106	-0.86578	-0.000650024
-0.86334	-0.00050293	-0.86334	-0.000701294	-0.86334	-0.000640564
-0.8609	-0.000495239	-0.8609	-0.000691528	-0.8609	-0.000631409
-0.85846	-0.000487061	-0.85846	-0.000681763	-0.85846	-0.000623169
-0.85602	-0.000479095	-0.85602	-0.000672607	-0.85602	-0.000613708
-0.85358	-0.000474335	-0.85358	-0.000663452	-0.85358	-0.000605469
-0.85114	-0.000466583	-0.85114	-0.000654907	-0.85114	-0.000596313
-0.84869	-0.000458527	-0.84869	-0.000646057	-0.84869	-0.000587769
-0.84625	-0.000451233	-0.84625	-0.000637207	-0.84625	-0.000579834
-0.84381	-0.00044397	-0.84381	-0.000628662	-0.84381	-0.000571594
-0.84137	-0.000437042	-0.84137	-0.000620728	-0.84137	-0.00056427
-0.83893	-0.000430145	-0.83893	-0.000612488	-0.83893	-0.000556335
-0.83649	-0.000423523	-0.83649	-0.000604553	-0.83649	-0.000549011
-0.83405	-0.000417206	-0.83405	-0.000596619	-0.83405	-0.000541687
-0.8316	-0.000410553	-0.8316	-0.000589294	-0.8316	-0.000534058
-0.82916	-0.000403992	-0.82916	-0.00058136	-0.82916	-0.000526733
-0.82672	-0.000397797	-0.82672	-0.000574036	-0.82672	-0.000519104
-0.82428	-0.000391388	-0.82428	-0.000567017	-0.82428	-0.000511475
-0.82184	-0.000385162	-0.82184	-0.000560303	-0.82184	-0.00050354
-0.8194	-0.000379059	-0.8194	-0.000552979	-0.8194	-0.000497284
-0.81696	-0.000373016	-0.81696	-0.00054657	-0.81696	-0.000490387
-0.81451	-0.000367218	-0.81451	-0.000539856	-0.81451	-0.000483734
-0.81207	-0.000361359	-0.81207	-0.000533142	-0.81207	-0.000476868
-0.80963	-0.000355499	-0.80963	-0.000526733	-0.80963	-0.000470093
-0.80719	-0.000350098	-0.80719	-0.000520325	-0.80719	-0.000463257
-0.80475	-0.000344513	-0.80475	-0.000513916	-0.80475	-0.000456482
-0.80231	-0.00033905	-0.80231	-0.000508118	-0.80231	-0.000453552
-0.79987	-0.000333679	-0.79987	-0.000501709	-0.79987	-0.000449249
-0.79742	-0.000328491	-0.79742	-0.000496552	-0.79742	-0.000442261
-0.79498	-0.000323273	-0.79498	-0.000490692	-0.79498	-0.000435913
-0.79254	-0.000318237	-0.79254	-0.000484955	-0.79254	-0.000432526
-0.7901	-0.000312988	-0.7901	-0.000479126	-0.7901	-0.000426544
-0.78766	-0.000307922	-0.78766	-0.000473633	-0.78766	-0.000420105
-0.78522	-0.00030304	-0.78522	-0.000467621	-0.78522	-0.000413605
-0.78278	-0.000298492	-0.78278	-0.000462158	-0.78278	-0.000407379
-0.78033	-0.000293518	-0.78033	-0.000456757	-0.78033	-0.000401672
-0.77789	-0.000288696	-0.77789	-0.000451447	-0.77789	-0.000395782
-0.77545	-0.000284119	-0.77545	-0.000446198	-0.77545	-0.000390228
-0.77301	-0.000279724	-0.77301	-0.000440918	-0.77301	-0.000384705
-0.77057	-0.000275055	-0.77057	-0.000435699	-0.77057	-0.000379211
-0.76813	-0.00027066	-0.76813	-0.000430634	-0.76813	-0.000373962
-0.76569	-0.000266266	-0.76569	-0.000425537	-0.76569	-0.000368805
-0.76324	-0.000261963	-0.76324	-0.000420685	-0.76324	-0.000363739
-0.7608	-0.000257813	-0.7608	-0.000415588	-0.7608	-0.000358856
-0.75836	-0.000253876	-0.75836	-0.000410736	-0.75836	-0.000354095
-0.75592	-0.000249847	-0.75592	-0.000405823	-0.75592	-0.000349487
-0.75348	-0.000245972	-0.75348	-0.000401001	-0.75348	-0.000344849
-0.75104	-0.000242096	-0.75104	-0.000396149	-0.75104	-0.000340088
-0.7486	-0.000238373	-0.7486	-0.00039151	-0.7486	-0.000335571
-0.74615	-0.000234558	-0.74615	-0.000386688	-0.74615	-0.000330933
-0.74371	-0.000231171	-0.74371	-0.00038205	-0.74371	-0.000326447
-0.74127	-0.000227692	-0.74127	-0.000377228	-0.74127	-0.000322083
-0.73883	-0.000224274	-0.73883	-0.000372589	-0.73883	-0.000317719
-0.73639	-0.000220856	-0.73639	-0.000367981	-0.73639	-0.000313477
-0.73395	-0.000217468	-0.73395	-0.000363495	-0.73395	-0.000309357
-0.73151	-0.00021405	-0.73151	-0.000358826	-0.73151	-0.000305206
-0.72906	-0.00021402	-0.72906	-0.000354401	-0.72906	-0.000301453
-0.72662	-0.000212128	-0.72662	-0.000349884	-0.72662	-0.000297333
-0.72418	-0.000209717	-0.72418	-0.000345612	-0.72418	-0.000293396
-0.72174	-0.00020697	-0.72174	-0.000341217	-0.72174	-0.000289581
-0.7193	-0.000204224	-0.7193	-0.000337189	-0.7193	-0.00028595
-0.71686	-0.000201385	-0.71686	-0.000333069	-0.71686	-0.000282349
-0.71442	-0.000198517	-0.71442	-0.000328918	-0.71442	-0.000278809
-0.71198	-0.000195618	-0.71198	-0.000324646	-0.71198	-0.000275238
-0.70953	-0.000192932	-0.70953	-0.000320618	-0.70953	-0.000271912
-0.70709	-0.000190094	-0.70709	-0.000316559	-0.70709	-0.000268372
-0.70465	-0.000187286	-0.70465	-0.000312653	-0.70465	-0.000265076
-0.70221	-0.000184509	-0.70221	-0.000308777	-0.70221	-0.000261902
-0.69977	-0.000181915	-0.69977	-0.000305023	-0.69977	-0.000258636
-0.69733	-0.000179443	-0.69733	-0.0003013	-0.69733	-0.000255585
-0.69489	-0.00017688	-0.69489	-0.000297577	-0.69489	-0.000252563
-0.69244	-0.000174438	-0.69244	-0.000293945	-0.69244	-0.000249512
-0.69	-0.000172028	-0.69	-0.000290558	-0.69	-0.000246613
-0.68756	-0.000169617	-0.68756	-0.000287048	-0.68756	-0.000243774
-0.68512	-0.000167328	-0.68512	-0.000283752	-0.68512	-0.000241028
-0.68268	-0.000165009	-0.68268	-0.000280365	-0.68268	-0.000238281
-0.68024	-0.000162933	-0.68024	-0.000277191	-0.68024	-0.000235657
-0.6778	-0.000160736	-0.6778	-0.000274017	-0.6778	-0.000233063
-0.67535	-0.0001586	-0.67535	-0.000270905	-0.67535	-0.000230499
-0.67291	-0.000156464	-0.67291	-0.000267792	-0.67291	-0.000227875
-0.67047	-0.000154449	-0.67047	-0.000264862	-0.67047	-0.000225494
-0.66803	-0.000152405	-0.66803	-0.000261963	-0.66803	-0.000222931
-0.66559	-0.000150513	-0.66559	-0.000259216	-0.66559	-0.000220795
-0.66315	-0.000148621	-0.66315	-0.000256439	-0.66315	-0.000218536
-0.66071	-0.000146851	-0.66071	-0.000253723	-0.66071	-0.000217346
-0.65826	-0.00014505	-0.65826	-0.000251099	-0.65826	-0.000216553
-0.65582	-0.000143677	-0.65582	-0.000248535	-0.65582	-0.000214691
-0.65338	-0.000141968	-0.65338	-0.000246033	-0.65338	-0.000212799
-0.65094	-0.000140289	-0.65094	-0.000243622	-0.65094	-0.000210999
-0.6485	-0.00013858	-0.6485	-0.00024118	-0.6485	-0.000209106
-0.64606	-0.000136963	-0.64606	-0.000238892	-0.64606	-0.000207306
-0.64362	-0.000135406	-0.64362	-0.000236542	-0.64362	-0.000205536
-0.64117	-0.000133911	-0.64117	-0.000234344	-0.64117	-0.000203827
-0.63873	-0.000132568	-0.63873	-0.000232147	-0.63873	-0.000202087
-0.63629	-0.000131195	-0.63629	-0.000230042	-0.63629	-0.000200348
-0.63385	-0.000129913	-0.63385	-0.000227936	-0.63385	-0.000198547
-0.63141	-0.000128571	-0.63141	-0.000226013	-0.63141	-0.00019693
-0.62897	-0.000127197	-0.62897	-0.000223969	-0.62897	-0.000195221
-0.62653	-0.000125916	-0.62653	-0.000222107	-0.62653	-0.000193542
-0.62408	-0.000124725	-0.62408	-0.000220215	-0.62408	-0.000191864
-0.62164	-0.000123474	-0.62164	-0.000218353	-0.62164	-0.000190308
-0.6192	-0.000122253	-0.6192	-0.000216492	-0.6192	-0.000188751
-0.61676	-0.000121063	-0.61676	-0.000214691	-0.61676	-0.000187164
-0.61432	-0.000119873	-0.61432	-0.000212891	-0.61432	-0.000185547
-0.61188	-0.000118774	-0.61188	-0.000211243	-0.61188	-0.000184052
-0.60944	-0.000117645	-0.60944	-0.000209534	-0.60944	-0.000182465
-0.60699	-0.000116638	-0.60699	-0.000207947	-0.60699	-0.000180969
-0.60455	-0.00011554	-0.60455	-0.000206299	-0.60455	-0.000179504
-0.60211	-0.000114563	-0.60211	-0.000204803	-0.60211	-0.00017807
-0.59967	-0.000113525	-0.59967	-0.000203278	-0.59967	-0.000176666
-0.59723	-0.000112549	-0.59723	-0.000201843	-0.59723	-0.000175201
-0.59479	-0.000111633	-0.59479	-0.000200348	-0.59479	-0.000173798
-0.59235	-0.000110687	-0.59235	-0.000198975	-0.59235	-0.000172394
-0.5899	-0.000109711	-0.5899	-0.00019754	-0.5899	-0.00017099
-0.58746	-0.000108856	-0.58746	-0.000196259	-0.58746	-0.000169678
-0.58502	-0.000108307	-0.58502	-0.000194885	-0.58502	-0.000168304
-0.58258	-0.000107819	-0.58258	-0.000193573	-0.58258	-0.000166931
-0.58014	-0.000107086	-0.58014	-0.00019223	-0.58014	-0.000165558
-0.5777	-0.000106232	-0.5777	-0.000190918	-0.5777	-0.000164215
-0.57526	-0.000105408	-0.57526	-0.000189606	-0.57526	-0.000162872
-0.57281	-0.000104584	-0.57281	-0.000188416	-0.57281	-0.00016156
-0.57037	-0.000103729	-0.57037	-0.000187164	-0.57037	-0.000160217
-0.56793	-0.000102997	-0.56793	-0.000186066	-0.56793	-0.000158936
-0.56549	-0.000102173	-0.56549	-0.000184814	-0.56549	-0.000157623
-0.56305	-0.000101471	-0.56305	-0.000183685	-0.56305	-0.000156342
-0.56061	-0.000100739	-0.56061	-0.000182495	-0.56061	-0.00015506
-0.55817	-0.000100006	-0.55817	-0.000181335	-0.55817	-0.000153809
-0.55573	-9.92432e-05	-0.55573	-0.000180145	-0.55573	-0.000152527
-0.55328	-9.86023e-05	-0.55328	-0.000179108	-0.55328	-0.000151337
-0.55084	-9.79309e-05	-0.55084	-0.000177979	-0.55084	-0.000150146
-0.5484	-9.729e-05	-0.5484	-0.000176971	-0.5484	-0.000148956
-0.54596	-9.66187e-05	-0.54596	-0.000175842	-0.54596	-0.000147797
-0.54352	-9.59778e-05	-0.54352	-0.000174866	-0.54352	-0.000146698
-0.54108	-9.53369e-05	-0.54108	-0.000173889	-0.54108	-0.000145569
-0.53864	-9.47571e-05	-0.53864	-0.000172974	-0.53864	-0.000144379
-0.53619	-9.42078e-05	-0.53619	-0.000171997	-0.53619	-0.000143188
-0.53375	-9.36584e-05	-0.53375	-0.000171204	-0.53375	-0.000142059
-0.53131	-9.30176e-05	-0.53131	-0.000170288	-0.53131	-0.0001409
-0.52887	-9.24683e-05	-0.52887	-0.000169495	-0.52887	-0.00013974
-0.52643	-9.18884e-05	-0.52643	-0.000170013	-0.52643	-0.00013855
-0.52399	-9.13696e-05	-0.52399	-0.000169128	-0.52399	-0.000137451
-0.52155	-9.08203e-05	-0.52155	-0.000168945	-0.52155	-0.000136322
-0.5191	-9.0271e-05	-0.5191	-0.00016861	-0.5191	-0.000135162
-0.51666	-8.96912e-05	-0.51666	-0.000167725	-0.51666	-0.000133972
-0.51422	-8.92334e-05	-0.51422	-0.00016687	-0.51422	-0.000132843
-0.51178	-8.87756e-05	-0.51178	-0.000165558	-0.51178	-0.000131653
-0.50934	-8.83179e-05	-0.50934	-0.000164429	-0.50934	-0.000130524
-0.5069	-8.77686e-05	-0.5069	-0.000163269	-0.5069	-0.000129364
-0.50446	-8.72498e-05	-0.50446	-0.000162201	-0.50446	-0.000128235
-0.50201	-8.6731e-05	-0.50201	-0.000161102	-0.50201	-0.000127106
-0.49957	-8.62122e-05	-0.49957	-0.000160065	-0.49957	-0.000125977
-0.49713	-8.56628e-05	-0.49713	-0.000158966	-0.49713	-0.000124847
-0.49469	-8.51746e-05	-0.49469	-0.000158051	-0.49469	-0.000123718
-0.49225	-8.46252e-05	-0.49225	-0.000157013	-0.49225	-0.000122559
-0.48981	-8.41675e-05	-0.48981	-0.000156067	-0.48981	-0.00012146
-0.48737	-8.36182e-05	-0.48737	-0.000154999	-0.48737	-0.0001203
-0.48492	-8.31299e-05	-0.48492	-0.000154083	-0.48492	-0.000119202
-0.48248	-8.26416e-05	-0.48248	-0.000153107	-0.48248	-0.000118073
-0.48004	-8.21228e-05	-0.48004	-0.00015213	-0.48004	-0.000116974
-0.4776	-8.1604e-05	-0.4776	-0.000151093	-0.4776	-0.000115875
-0.47516	-8.11462e-05	-0.47516	-0.000150177	-0.47516	-0.000115265
-0.47272	-8.05969e-05	-0.47272	-0.000149139	-0.47272	-0.000114471
-0.47028	-8.01392e-05	-0.47028	-0.000148254	-0.47028	-0.000113647
-0.46783	-7.96509e-05	-0.46783	-0.000147278	-0.46783	-0.00011264
-0.46539	-7.91626e-05	-0.46539	-0.000146332	-0.46539	-0.000111603
-0.46295	-7.86438e-05	-0.46295	-0.000145355	-0.46295	-0.000111084
-0.46051	-7.81555e-05	-0.46051	-0.000144409	-0.46051	-0.000111115
-0.45807	-7.76672e-05	-0.45807	-0.000143402	-0.45807	-0.000110413
-0.45563	-7.7179e-05	-0.45563	-0.000142517	-0.45563	-0.000109558
-0.45319	-7.66907e-05	-0.45319	-0.000141479	-0.45319	-0.000108459
-0.45074	-7.62329e-05	-0.45074	-0.000140564	-0.45074	-0.000107361
-0.4483	-7.57141e-05	-0.4483	-0.000139557	-0.4483	-0.00010614
-0.44586	-7.52258e-05	-0.44586	-0.000138641	-0.44586	-0.00010498
-0.44342	-7.4707e-05	-0.44342	-0.000137695	-0.44342	-0.00010376
-0.44098	-7.41882e-05	-0.44098	-0.000136688	-0.44098	-0.000102509
-0.43854	-7.36389e-05	-0.43854	-0.000135651	-0.43854	-0.000101227
-0.4361	-7.31812e-05	-0.4361	-0.000134766	-0.4361	-0.000100006
-0.43365	-7.26624e-05	-0.43365	-0.000133728	-0.43365	-9.86938e-05
-0.43121	-7.21741e-05	-0.43121	-0.000132813	-0.43121	-9.74731e-05
-0.42877	-7.16553e-05	-0.42877	-0.000131805	-0.42877	-9.62219e-05
-0.42633	-7.1167e-05	-0.42633	-0.000130829	-0.42633	-9.50012e-05
-0.42389	-7.06482e-05	-0.42389	-0.000129822	-0.42389	-9.37805e-05
-0.42145	-7.01294e-05	-0.42145	-0.000128876	-0.42145	-9.25598e-05
-0.41901	-6.96106e-05	-0.41901	-0.000127808	-0.41901	-9.12781e-05
-0.41656	-6.91223e-05	-0.41656	-0.000126862	-0.41656	-9.00574e-05
-0.41412	-6.85425e-05	-0.41412	-0.000125763	-0.41412	-8.87451e-05
-0.41168	-6.82068e-05	-0.41168	-0.000124817	-0.41168	-8.75244e-05
-0.40924	-6.77185e-05	-0.40924	-0.000123688	-0.40924	-8.62122e-05
-0.4068	-6.72607e-05	-0.4068	-0.000122711	-0.4068	-8.5022e-05
-0.40436	-6.67419e-05	-0.40436	-0.000121674	-0.40436	-8.37708e-05
-0.40192	-6.62842e-05	-0.40192	-0.000120605	-0.40192	-8.2489e-05
-0.39948	-6.57349e-05	-0.39948	-0.000119476	-0.39948	-8.11462e-05
-0.39703	-6.52161e-05	-0.39703	-0.00011853	-0.39703	-7.9895e-05
-0.39459	-6.46057e-05	-0.39459	-0.000117371	-0.39459	-7.85522e-05
-0.39215	-6.40869e-05	-0.39215	-0.000116394	-0.39215	-7.7301e-05
-0.38971	-6.35071e-05	-0.38971	-0.000115265	-0.38971	-7.60193e-05
-0.38727	-6.29578e-05	-0.38727	-0.000114166	-0.38727	-7.46765e-05
-0.38483	-6.24084e-05	-0.38483	-0.000113068	-0.38483	-7.33643e-05
-0.38239	-6.17981e-05	-0.38239	-0.000111938	-0.38239	-7.20825e-05
-0.37994	-6.11877e-05	-0.37994	-0.000110718	-0.37994	-7.08008e-05
-0.3775	-6.06384e-05	-0.3775	-0.00010965	-0.3775	-6.95496e-05
-0.37506	-5.99976e-05	-0.37506	-0.000108459	-0.37506	-6.82373e-05
-0.37262	-5.94482e-05	-0.37262	-0.000107361	-0.37262	-6.70471e-05
-0.37018	-5.88074e-05	-0.37018	-0.00010614	-0.37018	-6.56738e-05
-0.36774	-5.82275e-05	-0.36774	-0.000105011	-0.36774	-6.44226e-05
-0.3653	-5.76172e-05	-0.3653	-0.000103821	-0.3653	-6.31409e-05
-0.36285	-5.70068e-05	-0.36285	-0.000102631	-0.36285	-6.18286e-05
-0.36041	-5.6366e-05	-0.36041	-0.000101379	-0.36041	-6.05164e-05
-0.35797	-5.57556e-05	-0.35797	-0.000100281	-0.35797	-5.92957e-05
-0.35553	-5.50842e-05	-0.35553	-9.90295e-05	-0.35553	-5.79834e-05
-0.35309	-5.45044e-05	-0.35309	-9.80225e-05	-0.35309	-5.67322e-05
-0.35065	-5.3833e-05	-0.35065	-9.69849e-05	-0.35065	-5.54199e-05
-0.34821	-5.32227e-05	-0.34821	-9.59778e-05	-0.34821	-5.41687e-05
-0.34576	-5.25513e-05	-0.34576	-9.48181e-05	-0.34576	-5.2887e-05
-0.34332	-5.19104e-05	-0.34332	-9.35974e-05	-0.34332	-5.16357e-05
-0.34088	-5.1239e-05	-0.34088	-9.22852e-05	-0.34088	-5.03235e-05
-0.33844	-5.05981e-05	-0.33844	-9.1095e-05	-0.33844	-4.91638e-05
-0.336	-4.98962e-05	-0.336	-8.97217e-05	-0.336	-4.78607e-05
-0.33356	-4.94019e-05	-0.33356	-8.84399e-05	-0.33356	-4.66492e-05
-0.33112	-4.87762e-05	-0.33112	-8.70667e-05	-0.33112	-4.53583e-05
-0.32867	-4.81842e-05	-0.32867	-8.75549e-05	-0.32867	-4.41681e-05
-0.32623	-4.75403e-05	-0.32623	-8.7738e-05	-0.32623	-4.27155e-05
-0.32379	-4.66736e-05	-0.32379	-8.69751e-05	-0.32379	-4.14734e-05
-0.32135	-4.59656e-05	-0.32135	-8.64258e-05	-0.32135	-4.01917e-05
-0.31891	-4.53247e-05	-0.31891	-8.62427e-05	-0.31891	-3.90015e-05
-0.31647	-4.45953e-05	-0.31647	-8.48694e-05	-0.31647	-3.77258e-05
-0.31403	-4.39514e-05	-0.31403	-8.34656e-05	-0.31403	-3.65417e-05
-0.31158	-4.3219e-05	-0.31158	-8.19397e-05	-0.31158	-3.52875e-05
-0.30914	-4.25476e-05	-0.30914	-8.03833e-05	-0.30914	-3.40942e-05
-0.3067	-4.18457e-05	-0.3067	-7.87659e-05	-0.3067	-3.28766e-05
-0.30426	-4.11377e-05	-0.30426	-7.7179e-05	-0.30426	-3.1665e-05
-0.30182	-4.03839e-05	-0.30182	-7.55615e-05	-0.30182	-3.04077e-05
-0.29938	-3.97156e-05	-0.29938	-7.40662e-05	-0.29938	-2.92358e-05
-0.29694	-3.89618e-05	-0.29694	-7.24792e-05	-0.29694	-2.79846e-05
-0.29449	-3.82721e-05	-0.29449	-7.10449e-05	-0.29449	-2.68555e-05
-0.29205	-3.75031e-05	-0.29205	-6.9519e-05	-0.29205	-2.56226e-05
-0.28961	-3.68134e-05	-0.28961	-6.81152e-05	-0.28961	-2.44843e-05
-0.28717	-3.6087e-05	-0.28717	-6.66504e-05	-0.28717	-2.33032e-05
-0.28473	-3.53729e-05	-0.28473	-6.52161e-05	-0.28473	-2.21283e-05
-0.28229	-3.46252e-05	-0.28229	-6.36902e-05	-0.28229	-2.09229e-05
-0.27985	-3.39508e-05	-0.27985	-6.23474e-05	-0.27985	-1.9812e-05
-0.2774	-3.32031e-05	-0.2774	-6.08521e-05	-0.2774	-1.86218e-05
-0.27496	-3.25287e-05	-0.27496	-5.95398e-05	-0.27496	-1.75262e-05
-0.27252	-3.18207e-05	-0.27252	-5.81055e-05	-0.27252	-1.6391e-05
-0.27008	-3.1131e-05	-0.27008	-5.67627e-05	-0.27008	-1.5274e-05
-0.26764	-3.04138e-05	-0.26764	-5.53894e-05	-0.26764	-1.41541e-05
-0.2652	-2.9715e-05	-0.2652	-5.40161e-05	-0.2652	-1.30341e-05
-0.26276	-2.89734e-05	-0.26276	-5.25818e-05	-0.26276	-1.18927e-05
-0.26031	-2.83142e-05	-0.26031	-5.13306e-05	-0.26031	-1.08459e-05
-0.25787	-2.75757e-05	-0.25787	-4.98962e-05	-0.25787	-9.73206e-06
-0.25543	-2.69348e-05	-0.25543	-4.86847e-05	-0.25543	-8.70972e-06
-0.25299	-2.62207e-05	-0.25299	-4.72992e-05	-0.25299	-7.65076e-06
-0.25055	-2.55981e-05	-0.25055	-4.6048e-05	-0.25055	-6.67725e-06
-0.24811	-2.49146e-05	-0.24811	-4.47296e-05	-0.24811	-5.69763e-06
-0.24567	-2.42371e-05	-0.24567	-4.3219e-05	-0.24567	-4.76074e-06
-0.24323	-2.35352e-05	-0.24323	-4.1861e-05	-0.24323	-3.80981e-06
-0.24078	-2.29126e-05	-0.24078	-4.06677e-05	-0.24078	-2.94525e-06
-0.23834	-2.22168e-05	-0.23834	-3.93372e-05	-0.23834	-2.02393e-06
-0.2359	-2.16095e-05	-0.2359	-3.81531e-05	-0.2359	-1.16699e-06
-0.23346	-2.09503e-05	-0.23346	-3.68958e-05	-0.23346	-2.33459e-07
-0.23102	-2.03217e-05	-0.23102	-3.56903e-05	-0.23102	7.02209e-07
-0.22858	-1.96747e-05	-0.22858	-3.44666e-05	-0.22858	1.72943e-06
-0.22614	-1.90338e-05	-0.22614	-3.3255e-05	-0.22614	2.8244e-06
-0.22369	-1.83624e-05	-0.22369	-3.19885e-05	-0.22369	4.03992e-06
-0.22125	-1.77734e-05	-0.22125	-3.08563e-05	-0.22125	5.20996e-06
-0.21881	-1.71082e-05	-0.21881	-2.96051e-05	-0.21881	6.53412e-06
-0.21637	-1.651e-05	-0.21637	-2.84943e-05	-0.21637	7.76978e-06
-0.21393	-1.58539e-05	-0.21393	-2.72614e-05	-0.21393	9.13391e-06
-0.21149	-1.52618e-05	-0.21149	-2.61719e-05	-0.21149	1.03912e-05
-0.20905	-1.46362e-05	-0.20905	-2.49939e-05	-0.20905	1.1734e-05
-0.2066	-1.39984e-05	-0.2066	-2.38525e-05	-0.2066	1.30798e-05
-0.20416	-1.33331e-05	-0.20416	-2.26532e-05	-0.20416	1.45111e-05
-0.20172	-1.27472e-05	-0.20172	-2.1582e-05	-0.20172	1.5863e-05
-0.19928	-1.20758e-05	-0.19928	-2.03979e-05	-0.19928	1.74011e-05
-0.19684	-1.14807e-05	-0.19684	-1.9339e-05	-0.19684	1.88507e-05
-0.1944	-1.08307e-05	-0.1944	-1.81976e-05	-0.1944	2.04437e-05
-0.19196	-1.02051e-05	-0.19196	-1.71234e-05	-0.19196	2.20276e-05
-0.18951	-9.56421e-06	-0.18951	-1.60217e-05	-0.18951	2.36603e-05
-0.18707	-8.92944e-06	-0.18707	-1.49414e-05	-0.18707	2.5351e-05
-0.18463	-8.27026e-06	-0.18463	-1.38153e-05	-0.18463	2.71301e-05
-0.18219	-7.67212e-06	-0.18219	-1.28296e-05	-0.18219	2.88025e-05
-0.17975	-7.00989e-06	-0.17975	-1.1731e-05	-0.17975	3.06763e-05
-0.17731	-6.41785e-06	-0.17731	-1.07666e-05	-0.17731	3.23792e-05
-0.17487	-5.77698e-06	-0.17487	-9.69849e-06	-0.17487	3.42621e-05
-0.17242	-5.2002e-06	-0.17242	-8.73413e-06	-0.17242	3.59772e-05
-0.16998	-4.60327e-06	-0.16998	-7.73621e-06	-0.16998	3.78571e-05
-0.16754	-4.01855e-06	-0.16754	-6.75354e-06	-0.16754	3.96179e-05
-0.1651	-3.41125e-06	-0.1651	-5.74036e-06	-0.1651	4.15802e-05
-0.16266	-2.86896e-06	-0.16266	-4.83398e-06	-0.16266	4.3396e-05
-0.16022	-2.27814e-06	-0.16022	-3.82385e-06	-0.16022	4.54285e-05
-0.15778	-1.72729e-06	-0.15778	-2.92419e-06	-0.15778	4.72992e-05
-0.15533	-1.13007e-06	-0.15533	-1.93909e-06	-0.15533	4.92706e-05
-0.15289	-5.3772e-07	-0.15289	-9.59778e-07	-0.15289	5.12482e-05
-0.15045	1.20117e-07	-0.15045	7.75146e-08	-0.15045	5.33447e-05
-0.14801	8.1543e-07	-0.14801	1.16486e-06	-0.14801	5.53436e-05
-0.14557	1.5979e-06	-0.14557	2.35809e-06	-0.14557	5.75043e-05
-0.14313	2.34833e-06	-0.14313	3.48114e-06	-0.14313	5.9491e-05
-0.14069	3.22723e-06	-0.14069	4.70886e-06	-0.14069	6.16913e-05
-0.13824	4.0448e-06	-0.13824	5.59265e-06	-0.13824	6.35986e-05
-0.1358	4.98199e-06	-0.1358	7.00195e-06	-0.1358	6.58569e-05
-0.13336	5.8432e-06	-0.13336	8.32214e-06	-0.13336	6.79321e-05
-0.13092	6.75934e-06	-0.13092	9.73511e-06	-0.13092	7.00989e-05
-0.12848	7.70569e-06	-0.12848	1.11633e-05	-0.12848	7.22961e-05
-0.12604	8.69751e-06	-0.12604	1.26801e-05	-0.12604	7.46155e-05
-0.1236	9.61914e-06	-0.1236	1.40533e-05	-0.1236	7.67212e-05
-0.12115	1.0675e-05	-0.12115	1.56158e-05	-0.12115	7.9071e-05
-0.11871	1.16547e-05	-0.11871	1.70502e-05	-0.11871	8.12073e-05
-0.11627	1.27808e-05	-0.11627	1.87073e-05	-0.11627	8.35266e-05
-0.11383	1.38702e-05	-0.11383	2.02942e-05	-0.11383	8.57544e-05
-0.11139	1.50208e-05	-0.11139	2.20154e-05	-0.11139	8.80432e-05
-0.10895	1.62323e-05	-0.10895	2.37915e-05	-0.10895	9.03625e-05
-0.10651	1.75415e-05	-0.10651	2.57446e-05	-0.10651	9.27429e-05
-0.10406	1.87836e-05	-0.10406	2.75757e-05	-0.10406	9.49402e-05
-0.10162	2.01935e-05	-0.10162	2.96753e-05	-0.10162	9.73816e-05
-0.09918	2.1524e-05	-0.09918	3.16437e-05	-0.09918	9.95789e-05
-0.09674	2.30072e-05	-0.09674	3.38623e-05	-0.09674	0.000102051
-0.0943	2.4411e-05	-0.0943	3.59314e-05	-0.0943	0.000104309
-0.09186	2.59277e-05	-0.09186	3.81836e-05	-0.09186	0.00010672
-0.08942	2.74719e-05	-0.08942	4.04419e-05	-0.08942	0.0001091
-0.08698	2.91412e-05	-0.08698	4.28589e-05	-0.08698	0.000111725
-0.08453	3.06915e-05	-0.08453	4.51019e-05	-0.08453	0.000114044
-0.08209	3.24402e-05	-0.08209	4.76135e-05	-0.08209	0.000116669
-0.07965	3.40851e-05	-0.07965	4.99146e-05	-0.07965	0.00011911
-0.07721	3.58337e-05	-0.07721	5.24261e-05	-0.07721	0.000121735
-0.07477	3.75732e-05	-0.07477	5.48706e-05	-0.07477	0.000124268
-0.07233	3.9389e-05	-0.07233	5.74249e-05	-0.07233	0.000126953
-0.06989	4.12201e-05	-0.06989	6.00037e-05	-0.06989	0.000129608
-0.06744	4.31824e-05	-0.06744	6.26221e-05	-0.06744	0.000132416
-0.065	4.50073e-05	-0.065	6.51245e-05	-0.065	0.000134949
-0.06256	4.7049e-05	-0.06256	6.79626e-05	-0.06256	0.000137878
-0.06012	4.89441e-05	-0.06012	7.05261e-05	-0.06012	0.000140503
-0.05768	5.10529e-05	-0.05768	7.33948e-05	-0.05768	0.000143463
-0.05524	5.29999e-05	-0.05524	7.60803e-05	-0.05524	0.00014624
-0.0528	5.5069e-05	-0.0528	7.89185e-05	-0.0528	0.00014917
-0.05035	5.71655e-05	-0.05035	8.18176e-05	-0.05035	0.0001521
-0.04791	5.93628e-05	-0.04791	8.48999e-05	-0.04791	0.000155273
-0.04547	6.13953e-05	-0.04547	8.77686e-05	-0.04547	0.000158203
-0.04303	6.35071e-05	-0.04303	9.09424e-05	-0.04303	0.00016153
-0.04059	6.55518e-05	-0.04059	9.39331e-05	-0.04059	0.000164612
-0.03815	6.7749e-05	-0.03815	9.71985e-05	-0.03815	0.000167908
-0.03571	6.98547e-05	-0.03571	0.000100433	-0.03571	0.000171143
-0.03326	7.20215e-05	-0.03326	0.00010376	-0.03326	0.000174469
-0.03082	7.42493e-05	-0.03082	0.000107269	-0.03082	0.000177887
-0.02838	7.65686e-05	-0.02838	0.000110931	-0.02838	0.000181458
-0.02594	7.86743e-05	-0.02594	0.000114471	-0.02594	0.000184723
-0.0235	8.10242e-05	-0.0235	0.000118347	-0.0235	0.000188263
-0.02106	8.31604e-05	-0.02106	0.00012207	-0.02106	0.000191589
-0.01862	8.55103e-05	-0.01862	0.000126221	-0.01862	0.00019519
-0.01617	8.76465e-05	-0.01617	0.000130157	-0.01617	0.000198456
-0.01373	8.99353e-05	-0.01373	0.000134338	-0.01373	0.000201874
-0.01129	9.22546e-05	-0.01129	0.000138672	-0.01129	0.000205353
-0.00885	9.46655e-05	-0.00885	0.00014328	-0.00885	0.000208923
-0.00641	9.68933e-05	-0.00641	0.000147675	-0.00641	0.000212189
-0.00397	9.94263e-05	-0.00397	0.000152496	-0.00397	0.00021582
-0.00153	0.000101715	-0.00153	0.000157043	-0.00153	0.000219055
0.000915527	0.000104248	0.000915527	0.000161896	0.000915527	0.000222443
0.00336	0.00010675	0.00336	0.000166656	0.00336	0.000225586
0.0058	0.000109283	0.0058	0.000171478	0.0058	0.00022876
0.00824	0.000111877	0.00824	0.000176422	0.00824	0.000231842
0.01068	0.000114624	0.01068	0.000181549	0.01068	0.000234985
0.01312	0.000117157	0.01312	0.000186371	0.01312	0.000237549
0.01556	0.000119965	0.01556	0.000191528	0.01556	0.000240417
0.01801	0.00012262	0.01801	0.00019635	0.01801	0.000242706
0.02045	0.000125519	0.02045	0.000201508	0.02045	0.000245178
0.02289	0.000128204	0.02289	0.000206299	0.02289	0.000247162
0.02533	0.000131012	0.02533	0.000211334	0.02533	0.000249176
0.02777	0.00013385	0.02777	0.000216309	0.02777	0.000251068
0.03021	0.000136932	0.03021	0.000221466	0.03021	0.000253143
0.03265	0.000139832	0.03265	0.000226257	0.03265	0.000254608
0.0351	0.000143036	0.0351	0.000231384	0.0351	0.000256348
0.03754	0.000146027	0.03754	0.000236084	0.03754	0.000257599
0.03998	0.000149139	0.03998	0.000240906	0.03998	0.000258911
0.04242	0.000152344	0.04242	0.000245605	0.04242	0.000260132
0.04486	0.000155762	0.04486	0.000250488	0.04486	0.000261353
0.0473	0.000159241	0.0473	0.000255341	0.0473	0.000262543
0.04974	0.000162964	0.04974	0.000260406	0.04974	0.00026416
0.05219	0.000166473	0.05219	0.000265106	0.05219	0.000265594
0.05463	0.000170441	0.05463	0.000270294	0.05463	0.000267822
0.05707	0.000174133	0.05707	0.000275085	0.05707	0.00027005
0.05951	0.000178345	0.05951	0.000280426	0.05951	0.000273102
0.06195	0.000182281	0.06195	0.000285461	0.06195	0.000276062
0.06439	0.000186462	0.06439	0.000290802	0.06439	0.000279877
0.06683	0.000190765	0.06683	0.000296326	0.06683	0.000284332
0.06927	0.000195374	0.06927	0.000302277	0.06927	0.000289154
0.07172	0.000199677	0.07172	0.000307953	0.07172	0.000293549
0.07416	0.000204437	0.07416	0.00031427	0.07416	0.000298737
0.0766	0.000208893	0.0766	0.000320374	0.0766	0.000303497
0.07904	0.000213837	0.07904	0.000327271	0.07904	0.000308807
0.08148	0.000218536	0.08148	0.000333954	0.08148	0.000313721
0.08392	0.000223389	0.08392	0.000341003	0.08392	0.000317902
0.08636	0.000228241	0.08636	0.000348297	0.08636	0.000322815
0.08881	0.000233398	0.08881	0.000356049	0.08881	0.000328186
0.09125	0.00023822	0.09125	0.000363586	0.09125	0.000332733
0.09369	0.00024353	0.09369	0.000371857	0.09369	0.000338379
0.09613	0.000248535	0.09613	0.000379852	0.09613	0.000343689
0.09857	0.000254028	0.09857	0.00038858	0.09857	0.000349701
0.10101	0.000259186	0.10101	0.000397064	0.10101	0.000355377
0.10345	0.000264648	0.10345	0.000406006	0.10345	0.000361572
0.1059	0.000270203	0.1059	0.000415192	0.1059	0.000368011
0.10834	0.000276031	0.10834	0.000424896	0.10834	0.000374756
0.11078	0.000281433	0.11078	0.000434265	0.11078	0.000381348
0.11322	0.000287415	0.11322	0.000444458	0.11322	0.000388702
0.11566	0.000293091	0.11566	0.000454224	0.11566	0.00039566
0.1181	0.000299255	0.1181	0.000464691	0.1181	0.000403137
0.12054	0.000305267	0.12054	0.000475159	0.12054	0.000410583
0.12299	0.000311523	0.12299	0.000486023	0.12299	0.000418335
0.12543	0.000317902	0.12543	0.00049707	0.12543	0.000426178
0.12787	0.000324585	0.12787	0.000508636	0.12787	0.000434418
0.13031	0.000330994	0.13031	0.000519745	0.13031	0.000442261
0.13275	0.000338104	0.13275	0.00053183	0.13275	0.000450806
0.13519	0.00034491	0.13519	0.000543518	0.13519	0.000458832
0.13763	0.000352325	0.13763	0.000556061	0.13763	0.000467529
0.14008	0.000359344	0.14008	0.000568146	0.14008	0.000475769
0.14252	0.000366791	0.14252	0.00058078	0.14252	0.000484253
0.14496	0.00037442	0.14496	0.000593628	0.14496	0.000492859
0.1474	0.000382538	0.1474	0.000607178	0.1474	0.00050177
0.14984	0.000390381	0.14984	0.000620422	0.14984	0.000510254
0.15228	0.000398956	0.15228	0.000634155	0.15228	0.000519318
0.15472	0.000407257	0.15472	0.000647583	0.15472	0.00052774
0.15717	0.000416046	0.15717	0.000661621	0.15717	0.000536652
0.15961	0.000424927	0.15961	0.000675354	0.15961	0.000545227
0.16205	0.000434326	0.16205	0.000689697	0.16205	0.000553894
0.16449	0.000443909	0.16449	0.000704041	0.16449	0.000562408
0.16693	0.000454102	0.16693	0.000718994	0.16693	0.000571198
0.16937	0.000464081	0.16937	0.000733337	0.16937	0.000579193
0.17181	0.000475067	0.17181	0.000748901	0.17181	0.000587677
0.17426	0.000485809	0.17426	0.00076355	0.17426	0.000595459
0.1767	0.00049762	0.1767	0.000779114	0.1767	0.000603516
0.17914	0.000509247	0.17914	0.000794067	0.17914	0.000610962
0.18158	0.000521729	0.18158	0.000809631	0.18158	0.000617981
0.18402	0.00053476	0.18402	0.000825195	0.18402	0.000625
0.18646	0.000548553	0.18646	0.00084137	0.18646	0.000631714
0.1889	0.000562225	0.1889	0.000856628	0.1889	0.000637512
0.19135	0.000576965	0.19135	0.000872803	0.19135	0.000643616
0.19379	0.000591492	0.19379	0.000888672	0.19379	0.000648499
0.19623	0.000606812	0.19623	0.000904846	0.19623	0.000653687
0.19867	0.000622253	0.19867	0.000921021	0.19867	0.000657654
0.20111	0.000637817	0.20111	0.000937195	0.20111	0.000661011
0.20355	0.000653381	0.20355	0.000953674	0.20355	0.000662231
0.20599	0.000668945	0.20599	0.000970459	0.20599	0.000664063
0.20844	0.000683289	0.20844	0.000986633	0.20844	0.000664063
0.21088	0.000697327	0.21088	0.001	0.21088	0.000664063
0.21332	0.000709229	0.21332	0.00102	0.21332	0.000662231
0.21576	0.000720215	0.21576	0.00104	0.21576	0.00065979
0.2182	0.000728455	0.2182	0.00105	0.2182	0.000654297
0.22064	0.000733948	0.22064	0.00107	0.22064	0.000646667
0.22308	0.000735779	0.22308	0.00108	0.22308	0.000637207
0.22552	0.000733643	0.22552	0.0011	0.22552	0.000625305
0.22797	0.000724487	0.22797	0.00111	0.22797	0.000610046
0.23041	0.000709229	0.23041	0.00113	0.23041	0.000593262
0.23285	0.000686646	0.23285	0.00114	0.23285	0.000574951
0.23529	0.000660095	0.23529	0.00116	0.23529	0.000557251
0.23773	0.000632629	0.23773	0.00117	0.23773	0.000540771
0.24017	0.000606995	0.24017	0.00118	0.24017	0.000525513
0.24261	0.000583496	0.24261	0.00118	0.24261	0.000510559
0.24506	0.000563354	0.24506	0.00119	0.24506	0.000496094
0.2475	0.000544739	0.2475	0.00119	0.2475	0.000480957
0.24994	0.000528564	0.24994	0.00119	0.24994	0.000466705
0.25238	0.000513	0.25238	0.00118	0.25238	0.000452423
0.25482	0.000498657	0.25482	0.00117	0.25482	0.000438538
0.25726	0.000484711	0.25726	0.00115	0.25726	0.00042453
0.2597	0.00047113	0.2597	0.00112	0.2597	0.000412384
0.26215	0.000457764	0.26215	0.00108	0.26215	0.000400879
0.26459	0.000444611	0.26459	0.00103	0.26459	0.000390137
0.26703	0.000430817	0.26703	0.000977173	0.26703	0.000380127
0.26947	0.000417603	0.26947	0.000926514	0.26947	0.000371552
0.27191	0.000404297	0.27191	0.000882263	0.27191	0.000364105
0.27435	0.000391602	0.27435	0.000845032	0.27435	0.000357941
0.27679	0.000379425	0.27679	0.000812683	0.27679	0.000351563
0.27924	0.00036792	0.27924	0.000784607	0.27924	0.00034552
0.28168	0.000357239	0.28168	0.000758667	0.28168	0.000340179
0.28412	0.000347534	0.28412	0.000734863	0.28412	0.000335388
0.28656	0.000338165	0.28656	0.000711975	0.28656	0.000330719
0.289	0.000329498	0.289	0.000690918	0.289	0.000326355
0.29144	0.000321259	0.29144	0.000670471	0.29144	0.000321899
0.29388	0.00031366	0.29388	0.000652466	0.29388	0.000317719
0.29633	0.000306335	0.29633	0.000636597	0.29633	0.000313446
0.29877	0.000299408	0.29877	0.000622864	0.29877	0.000309113
0.30121	0.000292725	0.30121	0.000609436	0.30121	0.00030484
0.30365	0.000286377	0.30365	0.000596313	0.30365	0.000300598
0.30609	0.000280182	0.30609	0.000582886	0.30609	0.000296326
0.30853	0.000274414	0.30853	0.000570374	0.30853	0.000292389
0.31097	0.000268768	0.31097	0.000558777	0.31097	0.000288391
0.31342	0.000263336	0.31342	0.000548096	0.31342	0.000284607
0.31586	0.000258118	0.31586	0.00053772	0.31586	0.000281036
0.3183	0.000253204	0.3183	0.000527344	0.3183	0.000277771
0.32074	0.000248535	0.32074	0.000517273	0.32074	0.000274567
0.32318	0.000244141	0.32318	0.000507507	0.32318	0.000271729
0.32562	0.000239838	0.32562	0.000497437	0.32562	0.000268951
0.32806	0.000235779	0.32806	0.000487946	0.32806	0.000266388
0.33051	0.000231842	0.33051	0.000477325	0.33051	0.000263855
0.33295	0.000228119	0.33295	0.000466522	0.33295	0.000261444
0.33539	0.000224518	0.33539	0.000455109	0.33539	0.000259155
0.33783	0.000221069	0.33783	0.000443146	0.33783	0.00025708
0.34027	0.000217804	0.34027	0.000432007	0.34027	0.000254974
0.34271	0.000214722	0.34271	0.000421631	0.34271	0.00025296
0.34515	0.000211639	0.34515	0.000411957	0.34515	0.000250854
0.3476	0.00020874	0.3476	0.000403717	0.3476	0.000248932
0.35004	0.000205902	0.35004	0.000396393	0.35004	0.000246887
0.35248	0.000203094	0.35248	0.00039035	0.35248	0.000244812
0.35492	0.000200378	0.35492	0.000385071	0.35492	0.000242828
0.35736	0.000197876	0.35736	0.000380463	0.35736	0.000240875
0.3598	0.000195435	0.3598	0.000376343	0.3598	0.000238922
0.36224	0.000193085	0.36224	0.000372711	0.36224	0.000237091
0.36469	0.000190735	0.36469	0.000369049	0.36469	0.000235229
0.36713	0.000188507	0.36713	0.000365814	0.36713	0.000233521
0.36957	0.000186249	0.36957	0.000362457	0.36957	0.00023175
0.37201	0.000184204	0.37201	0.000359528	0.37201	0.00022995
0.37445	0.000182098	0.37445	0.000356537	0.37445	0.000228088
0.37689	0.000180145	0.37689	0.00035379	0.37689	0.00022641
0.37933	0.000178223	0.37933	0.000351166	0.37933	0.000224854
0.38177	0.00017627	0.38177	0.000348816	0.38177	0.000223267
0.38422	0.000174377	0.38422	0.000346313	0.38422	0.000221619
0.38666	0.000172638	0.38666	0.000344086	0.38666	0.000220062
0.3891	0.000170929	0.3891	0.000341827	0.3891	0.000218445
0.39154	0.00016925	0.39154	0.000339752	0.39154	0.000216797
0.39398	0.000167633	0.39398	0.000337799	0.39398	0.00021524
0.39642	0.000166016	0.39642	0.000335999	0.39642	0.000213654
0.39886	0.00016452	0.39886	0.000334381	0.39886	0.000212128
0.40131	0.000163025	0.40131	0.000332855	0.40131	0.000210724
0.40375	0.000161652	0.40375	0.000331238	0.40375	0.00020929
0.40619	0.000160339	0.40619	0.000329865	0.40619	0.000208008
0.40863	0.000158905	0.40863	0.000328491	0.40863	0.000206726
0.41107	0.000157532	0.41107	0.000327301	0.41107	0.000205383
0.41351	0.000156006	0.41351	0.000326019	0.41351	0.000203949
0.41595	0.000154694	0.41595	0.000324921	0.41595	0.000202545
0.4184	0.000153442	0.4184	0.000323853	0.4184	0.000201263
0.42084	0.000152191	0.42084	0.000322968	0.42084	0.000200012
0.42328	0.000150909	0.42328	0.00032196	0.42328	0.000198669
0.42572	0.000149719	0.42572	0.000321075	0.42572	0.000197388
0.42816	0.000148529	0.42816	0.000320129	0.42816	0.000196106
0.4306	0.000147461	0.4306	0.000319366	0.4306	0.000194916
0.43304	0.000146362	0.43304	0.000318542	0.43304	0.000193726
0.43549	0.000145294	0.43549	0.00031778	0.43549	0.000192566
0.43793	0.000144226	0.43793	0.000317047	0.43793	0.000191406
0.44037	0.00014325	0.44037	0.000316498	0.44037	0.000190308
0.44281	0.000142181	0.44281	0.000315735	0.44281	0.000189148
0.44525	0.000141296	0.44525	0.000315277	0.44525	0.00018808
0.44769	0.000140411	0.44769	0.000314667	0.44769	0.000187073
0.45013	0.000139526	0.45013	0.000314087	0.45013	0.000186066
0.45258	0.000138641	0.45258	0.000313416	0.45258	0.000185089
0.45502	0.000137787	0.45502	0.000312927	0.45502	0.000184113
0.45746	0.000137024	0.45746	0.000312408	0.45746	0.000183136
0.4599	0.00013623	0.4599	0.000312012	0.4599	0.00018222
0.46234	0.000135468	0.46234	0.000311493	0.46234	0.000181274
0.46478	0.000134796	0.46478	0.000311096	0.46478	0.000180389
0.46722	0.000134064	0.46722	0.000310516	0.46722	0.000179413
0.46967	0.000133362	0.46967	0.00031012	0.46967	0.000178528
0.47211	0.00013269	0.47211	0.00030957	0.47211	0.000177551
0.47455	0.00013205	0.47455	0.000309082	0.47455	0.000176788
0.47699	0.000131439	0.47699	0.000308624	0.47699	0.000176025
0.47943	0.000130859	0.47943	0.000308167	0.47943	0.000175232
0.48187	0.00013028	0.48187	0.000307648	0.48187	0.0001745
0.48431	0.000129761	0.48431	0.00030722	0.48431	0.000173859
0.48676	0.000129211	0.48676	0.000306641	0.48676	0.000173096
0.4892	0.000128723	0.4892	0.000306244	0.4892	0.000172485
0.49164	0.000128204	0.49164	0.000305695	0.49164	0.000171722
0.49408	0.000127808	0.49408	0.000305237	0.49408	0.00017099
0.49652	0.000127411	0.49652	0.000304749	0.49652	0.00017038
0.49896	0.000126984	0.49896	0.000304321	0.49896	0.000169708
0.5014	0.000126556	0.5014	0.000303711	0.5014	0.000169067
0.50385	0.00012619	0.50385	0.000303223	0.50385	0.000168457
0.50629	0.000125763	0.50629	0.000302612	0.50629	0.000167786
0.50873	0.000125397	0.50873	0.000302063	0.50873	0.000167267
0.51117	0.000125061	0.51117	0.0003013	0.51117	0.000166718
0.51361	0.000124756	0.51361	0.000300629	0.51361	0.000166199
0.51605	0.00012442	0.51605	0.000299896	0.51605	0.00016568
0.51849	0.000124115	0.51849	0.000299316	0.51849	0.000165161
0.52094	0.000123779	0.52094	0.000298523	0.52094	0.000164703
0.52338	0.000123535	0.52338	0.000297882	0.52338	0.000164215
0.52582	0.000123169	0.52582	0.000297089	0.52582	0.000163666
0.52826	0.000122925	0.52826	0.000296265	0.52826	0.000163177
0.5307	0.00012262	0.5307	0.000295319	0.5307	0.000162689
0.53314	0.000122345	0.53314	0.000294434	0.53314	0.000162201
0.53558	0.00012204	0.53558	0.000293671	0.53558	0.000161682
0.53802	0.000121796	0.53802	0.000292938	0.53802	0.000161194
0.54047	0.00012149	0.54047	0.000292084	0.54047	0.000160797
0.54291	0.000121246	0.54291	0.00029126	0.54291	0.0001604
0.54535	0.000121002	0.54535	0.000290253	0.54535	0.000159973
0.54779	0.000120728	0.54779	0.000289398	0.54779	0.000159607
0.55023	0.000120483	0.55023	0.000288544	0.55023	0.000159241
0.55267	0.000120209	0.55267	0.00028775	0.55267	0.000158844
0.55511	0.000119965	0.55511	0.000286896	0.55511	0.000158417
0.55756	0.000119812	0.55756	0.000286011	0.55756	0.00015802
0.56	0.000119537	0.56	0.000285004	0.56	0.000157623
0.56244	0.000119324	0.56244	0.000284149	0.56244	0.000157288
0.56488	0.00011908	0.56488	0.000283112	0.56488	0.000156982
0.56732	0.000118896	0.56732	0.000282288	0.56732	0.000156769
0.56976	0.000118683	0.56976	0.000281311	0.56976	0.000156525
0.5722	0.00011853	0.5722	0.000280457	0.5722	0.000156311
0.57465	0.000118347	0.57465	0.00027948	0.57465	0.000156006
0.57709	0.000118225	0.57709	0.000278595	0.57709	0.000155762
0.57953	0.000118042	0.57953	0.000277588	0.57953	0.000155457
0.58197	0.000117889	0.58197	0.000276642	0.58197	0.000155212
0.58441	0.000117676	0.58441	0.000275604	0.58441	0.000154999
0.58685	0.000117584	0.58685	0.000274689	0.58685	0.000154816
0.58929	0.000117462	0.58929	0.000273712	0.58929	0.000154694
0.59174	0.000117371	0.59174	0.000272888	0.59174	0.000154602
0.59418	0.000117279	0.59418	0.000272003	0.59418	0.000154541
0.59662	0.000117218	0.59662	0.00027124	0.59662	0.000154572
0.59906	0.000117157	0.59906	0.000270325	0.59906	0.00015451
0.6015	0.000117157	0.6015	0.000269592	0.6015	0.00015448
0.60394	0.000117096	0.60394	0.000268707	0.60394	0.00015448
0.60638	0.000117065	0.60638	0.000267944	0.60638	0.000154541
0.60883	0.000117096	0.60883	0.000267151	0.60883	0.000154602
0.61127	0.000117126	0.61127	0.000266449	0.61127	0.000154724
0.61371	0.000117218	0.61371	0.000265778	0.61371	0.000154907
0.61615	0.00011734	0.61615	0.000265167	0.61615	0.000155182
0.61859	0.000117432	0.61859	0.000264587	0.61859	0.000155426
0.62103	0.000117615	0.62103	0.00026416	0.62103	0.000155762
0.62347	0.000117767	0.62347	0.000263672	0.62347	0.000156097
0.62592	0.000118011	0.62592	0.000263275	0.62592	0.000156525
0.62836	0.000118317	0.62836	0.000262909	0.62836	0.000157013
0.6308	0.000119049	0.6308	0.000262634	0.6308	0.000157623
0.63324	0.00011969	0.63324	0.000262421	0.63324	0.000158264
0.63568	0.0001203	0.63568	0.00026239	0.63568	0.000159027
0.63812	0.00012088	0.63812	0.000262268	0.63812	0.000160034
0.64056	0.000121552	0.64056	0.000262451	0.64056	0.00016095
0.64301	0.000122192	0.64301	0.000262604	0.64301	0.000161804
0.64545	0.000122986	0.64545	0.00026297	0.64545	0.000162903
0.64789	0.00012384	0.64789	0.000263367	0.64789	0.000164001
0.65033	0.000124756	0.65033	0.000263855	0.65033	0.000165314
0.65277	0.000125763	0.65277	0.000264435	0.65277	0.000166656
0.65521	0.000126831	0.65521	0.000265167	0.65521	0.000168121
0.65765	0.00012796	0.65765	0.00026593	0.65765	0.000169678
0.6601	0.000129211	0.6601	0.000266937	0.6601	0.000171417
0.66254	0.000130524	0.66254	0.000268036	0.66254	0.000173187
0.66498	0.000131927	0.66498	0.000269348	0.66498	0.00017514
0.66742	0.000133453	0.66742	0.000270752	0.66742	0.000177155
0.66986	0.000135071	0.66986	0.000272308	0.66986	0.000179352
0.6723	0.00013678	0.6723	0.000274017	0.6723	0.000181671
0.67474	0.000138672	0.67474	0.00027597	0.67474	0.000184143
0.67719	0.000140594	0.67719	0.000277954	0.67719	0.000186737
0.67963	0.000142731	0.67963	0.000280304	0.67963	0.000189484
0.68207	0.000144897	0.68207	0.000282745	0.68207	0.0001922
0.68451	0.000147278	0.68451	0.000285522	0.68451	0.000195282
0.68695	0.000149628	0.68695	0.0002883	0.68695	0.000198364
0.68939	0.000152191	0.68939	0.000291382	0.68939	0.000201599
0.69183	0.000154877	0.69183	0.000294678	0.69183	0.000204987
0.69427	0.000157715	0.69427	0.000298218	0.69427	0.000208618
0.69672	0.000160583	0.69672	0.00030191	0.69672	0.000212769
0.69916	0.000163727	0.69916	0.000305969	0.69916	0.000216461
0.7016	0.000166809	0.7016	0.00031012	0.7016	0.000220428
0.70404	0.000170166	0.70404	0.000314697	0.70404	0.000224701
0.70648	0.000173492	0.70648	0.000319305	0.70648	0.000228943
0.70892	0.000177002	0.70892	0.000324219	0.70892	0.00023349
0.71136	0.000180603	0.71136	0.000329407	0.71136	0.000238159
0.71381	0.000184387	0.71381	0.000334869	0.71381	0.000243042
0.71625	0.000188141	0.71625	0.000340424	0.71625	0.000247864
0.71869	0.000192169	0.71869	0.000346436	0.71869	0.00025296
0.72113	0.000196167	0.72113	0.000352417	0.72113	0.000258209
0.72357	0.000200348	0.72357	0.000358887	0.72357	0.000263489
0.72601	0.000204529	0.72601	0.000365417	0.72601	0.000268799
0.72845	0.000208984	0.72845	0.000372345	0.72845	0.000274475
0.7309	0.000213501	0.7309	0.000379578	0.7309	0.000280396
0.73334	0.000218201	0.73334	0.000387146	0.73334	0.000286316
0.73578	0.0002229	0.73578	0.000394745	0.73578	0.000292694
0.73822	0.000227814	0.73822	0.000402863	0.73822	0.000299042
0.74066	0.000232666	0.74066	0.00041095	0.74066	0.000305359
0.7431	0.00023764	0.7431	0.000419525	0.7431	0.00031189
0.74554	0.000242615	0.74554	0.000428253	0.74554	0.00031842
0.74799	0.000247833	0.74799	0.000437256	0.74799	0.000325226
0.75043	0.000253204	0.75043	0.000446503	0.75043	0.000332031
0.75287	0.000258789	0.75287	0.000456177	0.75287	0.000339233
0.75531	0.000264038	0.75531	0.000465851	0.75531	0.000346741
0.75775	0.000269684	0.75775	0.000476074	0.75775	0.000354584
0.76019	0.000275269	0.76019	0.000486206	0.76019	0.000361511
0.76263	0.000282135	0.76263	0.000496948	0.76263	0.000368713
0.76508	0.000287781	0.76508	0.000507599	0.76508	0.000375854
0.76752	0.000293365	0.76752	0.000518738	0.76752	0.000383209
0.76996	0.000300507	0.76996	0.00053009	0.76996	0.000390686
0.7724	0.000306885	0.7724	0.000542114	0.7724	0.000398895
0.77484	0.000312744	0.77484	0.000554443	0.77484	0.000406921
0.77728	0.000319153	0.77728	0.000567108	0.77728	0.000414825
0.77972	0.000325409	0.77972	0.000579376	0.77972	0.000422882
0.78217	0.000332031	0.78217	0.00059201	0.78217	0.000431091
0.78461	0.000339264	0.78461	0.000604767	0.78461	0.000438995
0.78705	0.00034613	0.78705	0.000618286	0.78705	0.000447021
0.78949	0.000352875	0.78949	0.000631714	0.78949	0.000455505
0.79193	0.000360199	0.79193	0.000645142	0.79193	0.000465393
0.79437	0.000367004	0.79437	0.000658875	0.79437	0.000477448
0.79681	0.000374115	0.79681	0.000673218	0.79681	0.000486816
0.79926	0.00038092	0.79926	0.000687256	0.79926	0.000495148
0.8017	0.00038797	0.8017	0.000701904	0.8017	0.000504089
0.80414	0.000395721	0.80414	0.000716858	0.80414	0.000512787
0.80658	0.000403107	0.80658	0.000732422	0.80658	0.000521515
0.80902	0.000410248	0.80902	0.000747986	0.80902	0.000530884
0.81146	0.000417725	0.81146	0.00076355	0.81146	0.000541748
0.8139	0.00042569	0.8139	0.000778809	0.8139	0.000550476
0.81635	0.000433472	0.81635	0.000794373	0.81635	0.000560089
0.81879	0.000440979	0.81879	0.000809937	0.81879	0.000570557
0.82123	0.000449463	0.82123	0.000826111	0.82123	0.000579102
0.82367	0.000457367	0.82367	0.00084259	0.82367	0.000588684
0.82611	0.000464874	0.82611	0.000860291	0.82611	0.000598602
0.82855	0.000472931	0.82855	0.000877075	0.82855	0.000609161
0.83099	0.000481232	0.83099	0.000894775	0.83099	0.000620117
0.83344	0.000489441	0.83344	0.000912476	0.83344	0.000631409
0.83588	0.000497955	0.83588	0.000929871	0.83588	0.000646057
0.83832	0.000506256	0.83832	0.00094696	0.83832	0.000668335
0.84076	0.000515472	0.84076	0.00096405	0.84076	0.000688782
0.8432	0.000523499	0.8432	0.000980835	0.8432	0.000700378
0.84564	0.000532074	0.84564	0.000997314	0.84564	0.00071106
0.84808	0.000540649	0.84808	0.00101	0.84808	0.000721741
0.85052	0.000550262	0.85052	0.00103	0.85052	0.000733643
0.85297	0.000558868	0.85297	0.00105	0.85297	0.000745239
0.85541	0.00056781	0.85541	0.00107	0.85541	0.000757751
0.85785	0.000576691	0.85785	0.00108	0.85785	0.000770569
0.86029	0.00058606	0.86029	0.0011	0.86029	0.000782166
0.86273	0.000595673	0.86273	0.00111	0.86273	0.000792542
0.86517	0.000605133	0.86517	0.00113	0.86517	0.000802917
0.86761	0.000614624	0.86761	0.00115	0.86761	0.000815125
0.87006	0.000624695	0.87006	0.00116	0.87006	0.000827942
0.8725	0.00063385	0.8725	0.00118	0.8725	0.000837708
0.87494	0.000643616	0.87494	0.00119	0.87494	0.000849609
0.87738	0.000652771	0.87738	0.00121	0.87738	0.000861816
0.87982	0.000661926	0.87982	0.00122	0.87982	0.000874023
0.88226	0.000671082	0.88226	0.00124	0.88226	0.000887146
0.8847	0.000680237	0.8847	0.00125	0.8847	0.000901184
0.88715	0.000689697	0.88715	0.00127	0.88715	0.000911865
0.88959	0.000698547	0.88959	0.00129	0.88959	0.000922852
0.89203	0.000707092	0.89203	0.0013	0.89203	0.000934753
0.89447	0.000716553	0.89447	0.00132	0.89447	0.000946655
0.89691	0.000724792	0.89691	0.00134	0.89691	0.000957336
0.89935	0.000733948	0.89935	0.00135	0.89935	0.000971069
0.90179	0.000742798	0.90179	0.00137	0.90179	0.00098114
0.90424	0.000751648	0.90424	0.00138	0.90424	0.00098999
0.90668	0.000759583	0.90668	0.0014	0.90668	0.00101
0.90912	0.000768127	0.90912	0.00141	0.90912	0.00102
0.91156	0.000776672	0.91156	0.00143	0.91156	0.00105
0.914	0.000784607	0.914	0.00144	0.914	0.00106
0.91644	0.000792236	0.91644	0.00146	0.91644	0.00107
0.91888	0.000799255	0.91888	0.00148	0.91888	0.00109
0.92133	0.000806885	0.92133	0.00149	0.92133	0.0011
0.92377	0.000814514	0.92377	0.0015	0.92377	0.00111
0.92621	0.000822754	0.92621	0.00151	0.92621	0.00112
0.92865	0.000830383	0.92865	0.00153	0.92865	0.00114
0.93109	0.000836792	0.93109	0.00154	0.93109	0.00116
0.93353	0.00084259	0.93353	0.00155	0.93353	0.00117
0.93597	0.000849915	0.93597	0.00156	0.93597	0.00118
0.93842	0.000857544	0.93842	0.00158	0.93842	0.00119
0.94086	0.000864563	0.94086	0.00159	0.94086	0.0012
0.9433	0.000873718	0.9433	0.00162	0.9433	0.00121
0.94574	0.000881042	0.94574	0.00164	0.94574	0.00123
0.94818	0.000889282	0.94818	0.00166	0.94818	0.00124
0.95062	0.000897827	0.95062	0.00167	0.95062	0.00124
0.95306	0.000906372	0.95306	0.00168	0.95306	0.00125
0.95551	0.000915222	0.95551	0.00169	0.95551	0.00126
0.95795	0.000924072	0.95795	0.00169	0.95795	0.00127
0.96039	0.000932617	0.96039	0.0017	0.96039	0.00128
0.96283	0.000940857	0.96283	0.00171	0.96283	0.00129
0.96527	0.000949707	0.96527	0.00171	0.96527	0.00129
0.96771	0.000960083	0.96771	0.00172	0.96771	0.00131
0.97015	0.000969849	0.97015	0.00172	0.97015	0.00132
0.9726	0.000979614	0.9726	0.00172	0.9726	0.00133
0.97504	0.00098877	0.97504	0.00173	0.97504	0.00134
0.97748	0.00099762	0.97748	0.00173	0.97748	0.00134
0.97992	0.00101	0.97992	0.00173	0.97992	0.00134
0.98236	0.00102	0.98236	0.00174	0.98236	0.00134
0.9848	0.00103	0.9848	0.00174	0.9848	0.00135
0.98724	0.00103	0.98724	0.00175	0.98724	0.00136
0.98969	0.00104	0.98969	0.00175	0.98969	0.00136
0.99213	0.00105	0.99213	0.00176	0.99213	0.00137
0.99457	0.00106	0.99457	0.00177	0.99457	0.00138
0.99701	0.00106	0.99701	0.00178	0.99701	0.0014
0.99945	0.00107	0.99945	0.00178	0.99945	0.00141
1.00189	0.00108	1.00189	0.00179	1.00189	0.0014
