# Supplementary material for: In-depth chiral sensing capability of C-dots in a biomimetic protein-based hydrogel: a probe for chiral recognition applications
Source: Royal Society of Chemistry journal article supplement (doi:10.1039/d5bm01508a), 2026-01-01
Supplement: d5bm01508a1.zip [file Figure 6.xlsx]

## Sheet: Figure 6 (a)
200	3.472	3.863	3.724	3.711	3.637	3.592	3.923
201	3.314	3.748	3.623	3.556	3.485	3.448	3.904
202	3.167	3.596	3.51	3.384	3.329	3.292	3.874
203	3.042	3.468	3.41	3.234	3.186	3.165	3.799
204	2.929	3.352	3.313	3.126	3.073	3.061	3.77
205	2.834	3.26	3.225	3.023	2.98	2.967	3.694
206	2.768	3.18	3.152	2.949	2.904	2.894	3.634
207	2.706	3.129	3.1	2.896	2.855	2.843	3.582
208	2.677	3.099	3.074	2.863	2.82	2.814	3.57
209	2.647	3.078	3.048	2.84	2.796	2.79	3.548
210	2.631	3.045	3.027	2.815	2.767	2.766	3.516
211	2.605	3.021	3.005	2.792	2.751	2.741	3.497
212	2.594	3.012	2.992	2.779	2.741	2.733	3.469
213	2.597	3.014	2.987	2.782	2.743	2.741	3.477
214	2.616	3.039	3.013	2.811	2.766	2.759	3.494
215	2.638	3.069	3.038	2.83	2.793	2.784	3.54
216	2.649	3.076	3.049	2.838	2.802	2.795	3.541
217	2.651	3.093	3.051	2.845	2.81	2.803	3.545
218	2.669	3.105	3.059	2.866	2.823	2.816	3.574
219	2.685	3.122	3.08	2.88	2.842	2.836	3.579
220	2.719	3.174	3.114	2.917	2.878	2.876	3.608
221	2.759	3.232	3.159	2.964	2.927	2.922	3.665
222	2.785	3.262	3.18	2.998	2.952	2.956	3.686
223	2.814	3.288	3.206	3.021	2.982	2.976	3.704
224	2.85	3.337	3.24	3.064	3.026	3.015	3.752
225	2.891	3.395	3.275	3.112	3.067	3.056	3.777
226	2.917	3.434	3.303	3.141	3.089	3.086	3.79
227	2.94	3.468	3.323	3.17	3.128	3.12	3.785
228	2.976	3.509	3.356	3.206	3.154	3.146	3.829
229	3.005	3.545	3.369	3.244	3.181	3.182	3.853
230	3.035	3.585	3.388	3.28	3.225	3.207	3.848
231	3.053	3.623	3.409	3.306	3.246	3.248	3.858
232	3.085	3.628	3.427	3.333	3.276	3.27	3.857
233	3.096	3.674	3.447	3.36	3.298	3.288	3.849
234	3.104	3.682	3.447	3.367	3.306	3.29	3.88
235	3.106	3.684	3.451	3.375	3.315	3.297	3.876
236	3.1	3.692	3.457	3.365	3.31	3.292	3.857
237	3.075	3.652	3.432	3.348	3.285	3.27	3.858
238	3.053	3.641	3.417	3.32	3.256	3.251	3.83
239	3.028	3.627	3.402	3.291	3.239	3.227	3.86
240	3	3.575	3.381	3.252	3.205	3.192	3.821
241	2.955	3.536	3.344	3.199	3.148	3.15	3.791
242	2.895	3.48	3.301	3.133	3.088	3.083	3.773
243	2.814	3.394	3.236	3.048	2.999	3.008	3.748
244	2.717	3.286	3.164	2.938	2.897	2.894	3.686
245	2.602	3.151	3.048	2.814	2.774	2.771	3.579
246	2.479	2.976	2.916	2.68	2.642	2.642	3.436
247	2.337	2.792	2.772	2.535	2.5	2.49	3.222
248	2.193	2.597	2.601	2.377	2.347	2.333	2.984
249	2.051	2.399	2.421	2.222	2.192	2.168	2.728
250	1.902	2.202	2.239	2.068	2.036	2.005	2.461
251	1.765	2.022	2.073	1.926	1.897	1.855	2.236
252	1.648	1.872	1.926	1.802	1.774	1.729	2.043
253	1.542	1.743	1.798	1.693	1.666	1.613	1.875
254	1.45	1.632	1.686	1.594	1.568	1.514	1.731
255	1.369	1.533	1.589	1.504	1.481	1.426	1.606
256	1.294	1.444	1.499	1.424	1.401	1.345	1.494
257	1.224	1.361	1.414	1.347	1.324	1.269	1.393
258	1.159	1.286	1.339	1.278	1.256	1.2	1.302
259	1.099	1.218	1.268	1.214	1.192	1.136	1.222
260	1.043	1.154	1.203	1.155	1.134	1.077	1.148
261	0.994	1.097	1.145	1.101	1.08	1.024	1.082
262	0.941	1.048	1.105	1.041	1.024	0.981	1.024
263	0.899	1	1.053	0.993	0.978	0.935	0.97
264	0.86	0.956	1.006	0.95	0.936	0.894	0.921
265	0.825	0.917	0.965	0.912	0.899	0.856	0.877
266	0.792	0.878	0.924	0.874	0.861	0.821	0.836
267	0.76	0.843	0.886	0.84	0.828	0.789	0.799
268	0.731	0.811	0.853	0.809	0.797	0.76	0.766
269	0.705	0.78	0.821	0.779	0.768	0.732	0.735
270	0.679	0.751	0.791	0.75	0.741	0.706	0.706
271	0.656	0.725	0.763	0.724	0.716	0.683	0.68
272	0.635	0.701	0.738	0.702	0.694	0.662	0.658
273	0.614	0.679	0.713	0.679	0.673	0.643	0.637
274	0.596	0.658	0.69	0.659	0.653	0.626	0.618
275	0.578	0.638	0.669	0.64	0.635	0.61	0.602
276	0.562	0.62	0.651	0.622	0.619	0.596	0.585
277	0.549	0.604	0.634	0.606	0.605	0.584	0.572
278	0.535	0.589	0.618	0.592	0.591	0.573	0.561
279	0.522	0.576	0.603	0.579	0.579	0.563	0.551
280	0.511	0.563	0.589	0.567	0.568	0.554	0.541
281	0.5	0.55	0.576	0.554	0.557	0.546	0.532
282	0.49	0.539	0.564	0.544	0.548	0.539	0.525
283	0.48	0.529	0.553	0.534	0.539	0.534	0.518
284	0.471	0.519	0.542	0.524	0.53	0.528	0.512
285	0.462	0.51	0.532	0.515	0.522	0.523	0.507
286	0.454	0.499	0.522	0.506	0.515	0.518	0.502
287	0.447	0.492	0.514	0.499	0.509	0.515	0.499
288	0.438	0.483	0.505	0.491	0.502	0.511	0.495
289	0.432	0.476	0.498	0.485	0.497	0.51	0.492
290	0.426	0.469	0.49	0.479	0.493	0.508	0.49
291	0.419	0.463	0.484	0.474	0.489	0.506	0.489
292	0.414	0.457	0.478	0.469	0.486	0.506	0.487
293	0.409	0.453	0.473	0.464	0.483	0.506	0.488
294	0.405	0.447	0.468	0.461	0.48	0.506	0.487
295	0.4	0.443	0.464	0.457	0.477	0.506	0.487
296	0.397	0.44	0.46	0.454	0.477	0.508	0.488
297	0.394	0.436	0.458	0.452	0.476	0.509	0.49
298	0.391	0.434	0.455	0.451	0.475	0.512	0.491
299	0.388	0.431	0.453	0.449	0.475	0.514	0.493
300	0.386	0.428	0.451	0.448	0.476	0.516	0.496
301	0.385	0.427	0.449	0.448	0.476	0.519	0.498
302	0.382	0.425	0.447	0.447	0.476	0.522	0.501
303	0.381	0.424	0.447	0.447	0.477	0.524	0.504
304	0.379	0.422	0.446	0.447	0.478	0.528	0.507
305	0.377	0.422	0.445	0.447	0.48	0.531	0.51
306	0.377	0.42	0.445	0.448	0.482	0.534	0.514
307	0.376	0.419	0.444	0.45	0.484	0.538	0.517
308	0.374	0.418	0.445	0.45	0.486	0.541	0.521
309	0.373	0.419	0.445	0.452	0.488	0.544	0.524
310	0.373	0.418	0.446	0.454	0.491	0.548	0.528
311	0.371	0.417	0.446	0.455	0.494	0.552	0.532
312	0.371	0.418	0.447	0.458	0.497	0.556	0.536
313	0.37	0.417	0.447	0.46	0.499	0.559	0.541
314	0.37	0.417	0.448	0.463	0.503	0.563	0.545
315	0.369	0.417	0.45	0.466	0.507	0.567	0.549
316	0.368	0.417	0.451	0.468	0.51	0.571	0.554
317	0.368	0.417	0.453	0.472	0.514	0.576	0.56
318	0.367	0.417	0.454	0.475	0.518	0.58	0.565
319	0.367	0.417	0.456	0.479	0.522	0.585	0.57
320	0.368	0.418	0.458	0.483	0.528	0.59	0.576
321	0.368	0.419	0.461	0.487	0.533	0.596	0.583
322	0.368	0.42	0.463	0.491	0.538	0.602	0.589
323	0.369	0.421	0.466	0.496	0.543	0.608	0.595
324	0.37	0.423	0.468	0.5	0.549	0.614	0.603
325	0.371	0.425	0.472	0.506	0.556	0.621	0.611
326	0.372	0.427	0.475	0.511	0.562	0.628	0.619
327	0.374	0.429	0.479	0.516	0.569	0.636	0.627
328	0.376	0.432	0.482	0.521	0.576	0.644	0.636
329	0.382	0.439	0.493	0.526	0.581	0.656	0.647
330	0.384	0.442	0.497	0.532	0.589	0.664	0.657
331	0.387	0.445	0.501	0.538	0.596	0.674	0.667
332	0.389	0.447	0.506	0.544	0.603	0.682	0.677
333	0.392	0.45	0.51	0.549	0.61	0.691	0.687
334	0.394	0.453	0.514	0.556	0.618	0.701	0.699
335	0.396	0.456	0.519	0.562	0.626	0.711	0.71
336	0.399	0.459	0.523	0.569	0.634	0.72	0.722
337	0.402	0.462	0.528	0.575	0.643	0.731	0.734
338	0.405	0.466	0.533	0.582	0.651	0.742	0.745
339	0.407	0.469	0.538	0.588	0.659	0.752	0.758
340	0.41	0.473	0.543	0.595	0.668	0.764	0.771
341	0.413	0.476	0.548	0.602	0.677	0.775	0.785
342	0.417	0.48	0.554	0.61	0.686	0.786	0.798
343	0.42	0.484	0.559	0.617	0.696	0.797	0.812
344	0.423	0.488	0.564	0.624	0.704	0.808	0.825
345	0.426	0.492	0.57	0.631	0.713	0.82	0.838
346	0.429	0.495	0.575	0.638	0.722	0.83	0.851
347	0.432	0.499	0.58	0.644	0.73	0.84	0.863
348	0.435	0.502	0.585	0.651	0.738	0.85	0.875
349	0.438	0.505	0.589	0.657	0.746	0.859	0.886
350	0.441	0.508	0.594	0.663	0.753	0.868	0.897
351	0.443	0.511	0.598	0.669	0.76	0.876	0.907
352	0.446	0.514	0.602	0.674	0.767	0.884	0.917
353	0.448	0.517	0.606	0.679	0.773	0.892	0.927
354	0.451	0.52	0.61	0.685	0.779	0.899	0.935
355	0.453	0.523	0.614	0.689	0.785	0.905	0.944
356	0.455	0.525	0.617	0.694	0.791	0.912	0.952
357	0.457	0.527	0.62	0.699	0.796	0.918	0.96
358	0.459	0.529	0.623	0.702	0.801	0.923	0.966
359	0.46	0.531	0.626	0.707	0.805	0.928	0.973
360	0.462	0.533	0.629	0.71	0.81	0.933	0.979
361	0.463	0.535	0.631	0.713	0.813	0.937	0.983
362	0.465	0.537	0.634	0.717	0.817	0.94	0.988
363	0.466	0.538	0.636	0.719	0.82	0.943	0.992
364	0.467	0.539	0.637	0.721	0.822	0.944	0.994
365	0.468	0.54	0.638	0.723	0.824	0.946	0.996
366	0.468	0.54	0.639	0.724	0.824	0.946	0.996
367	0.468	0.54	0.639	0.724	0.825	0.945	0.995
368	0.467	0.539	0.639	0.723	0.825	0.944	0.994
369	0.467	0.539	0.638	0.723	0.823	0.941	0.991
370	0.466	0.537	0.637	0.722	0.822	0.938	0.987
371	0.465	0.536	0.635	0.72	0.819	0.934	0.982
372	0.463	0.534	0.633	0.718	0.816	0.928	0.976
373	0.459	0.529	0.627	0.716	0.814	0.923	0.967
374	0.457	0.526	0.624	0.713	0.81	0.916	0.959
375	0.454	0.523	0.62	0.708	0.804	0.908	0.95
376	0.451	0.519	0.616	0.704	0.798	0.9	0.94
377	0.447	0.515	0.611	0.698	0.791	0.891	0.929
378	0.443	0.511	0.606	0.692	0.784	0.881	0.917
379	0.439	0.506	0.6	0.685	0.776	0.87	0.904
380	0.435	0.501	0.594	0.678	0.768	0.859	0.891
381	0.43	0.496	0.587	0.67	0.758	0.847	0.876
382	0.426	0.49	0.581	0.663	0.749	0.835	0.862
383	0.42	0.484	0.573	0.654	0.739	0.822	0.847
384	0.415	0.478	0.565	0.645	0.728	0.808	0.83
385	0.409	0.471	0.557	0.636	0.717	0.794	0.814
386	0.403	0.464	0.548	0.626	0.704	0.779	0.797
387	0.396	0.456	0.539	0.614	0.692	0.763	0.778
388	0.389	0.448	0.53	0.604	0.679	0.747	0.76
389	0.382	0.44	0.52	0.593	0.666	0.731	0.741
390	0.375	0.432	0.51	0.58	0.652	0.714	0.722
391	0.367	0.424	0.5	0.569	0.638	0.697	0.703
392	0.36	0.415	0.489	0.556	0.624	0.68	0.683
393	0.353	0.406	0.478	0.544	0.609	0.663	0.664
394	0.344	0.397	0.467	0.531	0.594	0.645	0.644
395	0.337	0.388	0.456	0.518	0.579	0.627	0.625
396	0.329	0.379	0.445	0.505	0.564	0.609	0.605
397	0.32	0.37	0.433	0.492	0.548	0.591	0.586
398	0.312	0.36	0.422	0.478	0.533	0.574	0.566
399	0.304	0.351	0.41	0.465	0.517	0.555	0.546
400	0.296	0.341	0.398	0.451	0.501	0.537	0.527
401	0.287	0.332	0.387	0.437	0.486	0.52	0.508
402	0.279	0.322	0.375	0.423	0.469	0.501	0.488
403	0.27	0.312	0.363	0.41	0.453	0.483	0.47
404	0.262	0.303	0.352	0.396	0.439	0.466	0.452
405	0.254	0.294	0.341	0.383	0.424	0.449	0.434
406	0.246	0.285	0.329	0.37	0.408	0.432	0.416
407	0.238	0.275	0.318	0.356	0.393	0.415	0.399
408	0.23	0.266	0.307	0.344	0.378	0.399	0.382
409	0.222	0.257	0.296	0.331	0.363	0.382	0.366
410	0.214	0.248	0.285	0.318	0.348	0.366	0.349
411	0.207	0.24	0.275	0.306	0.335	0.351	0.334
412	0.2	0.232	0.264	0.294	0.321	0.335	0.318
413	0.192	0.223	0.254	0.282	0.308	0.32	0.303
414	0.186	0.216	0.245	0.271	0.295	0.306	0.29
415	0.179	0.208	0.235	0.259	0.282	0.292	0.276
416	0.172	0.2	0.226	0.249	0.269	0.279	0.263
417	0.166	0.193	0.217	0.239	0.258	0.266	0.25
418	0.16	0.186	0.209	0.229	0.246	0.253	0.237
419	0.153	0.179	0.2	0.219	0.235	0.241	0.225
420	0.148	0.172	0.192	0.21	0.225	0.23	0.214
421	0.143	0.166	0.185	0.201	0.215	0.219	0.204
422	0.138	0.16	0.178	0.193	0.205	0.209	0.193
423	0.133	0.155	0.171	0.185	0.196	0.199	0.184
424	0.128	0.149	0.164	0.177	0.187	0.189	0.175
425	0.123	0.144	0.158	0.169	0.179	0.18	0.166
426	0.119	0.139	0.152	0.162	0.171	0.171	0.158
427	0.115	0.134	0.146	0.156	0.163	0.163	0.15
428	0.111	0.13	0.141	0.149	0.156	0.155	0.143
429	0.107	0.126	0.135	0.143	0.149	0.147	0.136
430	0.103	0.121	0.13	0.137	0.142	0.141	0.129
431	0.1	0.118	0.125	0.132	0.136	0.134	0.123
432	0.097	0.114	0.121	0.126	0.13	0.127	0.118
433	0.094	0.11	0.117	0.122	0.125	0.121	0.112
434	0.091	0.107	0.113	0.117	0.12	0.116	0.107
435	0.088	0.104	0.109	0.112	0.115	0.111	0.102
436	0.086	0.101	0.105	0.108	0.111	0.106	0.098
437	0.084	0.099	0.102	0.105	0.106	0.102	0.094
438	0.081	0.096	0.099	0.101	0.103	0.097	0.09
439	0.079	0.093	0.096	0.098	0.099	0.093	0.087
440	0.077	0.091	0.093	0.095	0.096	0.09	0.083
441	0.075	0.089	0.091	0.092	0.093	0.087	0.08
442	0.073	0.087	0.088	0.089	0.09	0.083	0.077
443	0.072	0.085	0.086	0.087	0.087	0.081	0.075
444	0.07	0.083	0.084	0.085	0.085	0.078	0.072
445	0.069	0.082	0.082	0.083	0.082	0.076	0.07
446	0.067	0.08	0.08	0.08	0.08	0.074	0.068
447	0.066	0.078	0.079	0.079	0.078	0.072	0.066
448	0.065	0.077	0.077	0.077	0.076	0.07	0.064
449	0.064	0.076	0.075	0.075	0.074	0.068	0.063
450	0.062	0.075	0.074	0.074	0.073	0.067	0.061
451	0.061	0.073	0.072	0.072	0.071	0.065	0.059
452	0.06	0.072	0.071	0.071	0.07	0.064	0.058
453	0.059	0.071	0.07	0.07	0.069	0.062	0.057
454	0.058	0.07	0.069	0.068	0.067	0.061	0.055
455	0.057	0.069	0.067	0.067	0.066	0.06	0.054
456	0.056	0.068	0.066	0.066	0.065	0.059	0.053
457	0.055	0.067	0.065	0.065	0.064	0.058	0.052
458	0.054	0.066	0.064	0.064	0.063	0.056	0.051
459	0.054	0.065	0.063	0.063	0.061	0.056	0.05
460	0.053	0.064	0.062	0.062	0.061	0.055	0.049
461	0.052	0.063	0.061	0.061	0.06	0.054	0.048
462	0.051	0.062	0.06	0.06	0.059	0.053	0.047
463	0.05	0.061	0.059	0.059	0.058	0.052	0.046
464	0.049	0.06	0.058	0.058	0.057	0.051	0.046
465	0.049	0.06	0.057	0.057	0.056	0.05	0.045
466	0.048	0.059	0.057	0.057	0.055	0.05	0.044
467	0.047	0.058	0.056	0.056	0.054	0.049	0.043
468	0.046	0.057	0.055	0.055	0.054	0.048	0.042
469	0.046	0.056	0.054	0.054	0.053	0.047	0.042
470	0.045	0.056	0.053	0.053	0.052	0.047	0.041
471	0.044	0.055	0.053	0.053	0.051	0.046	0.04
472	0.044	0.054	0.052	0.052	0.051	0.046	0.04
473	0.043	0.054	0.051	0.051	0.05	0.045	0.039
474	0.043	0.053	0.05	0.051	0.049	0.044	0.039
475	0.042	0.052	0.05	0.05	0.049	0.044	0.038
476	0.041	0.052	0.049	0.049	0.048	0.043	0.038
477	0.041	0.051	0.049	0.049	0.048	0.043	0.037
478	0.04	0.051	0.048	0.048	0.047	0.042	0.037
479	0.04	0.05	0.047	0.048	0.046	0.042	0.036
480	0.039	0.049	0.046	0.047	0.046	0.041	0.035
481	0.039	0.049	0.046	0.046	0.045	0.041	0.035
482	0.038	0.048	0.045	0.045	0.044	0.04	0.034
483	0.038	0.047	0.044	0.045	0.044	0.04	0.034
484	0.037	0.047	0.044	0.045	0.043	0.039	0.033
485	0.036	0.046	0.043	0.044	0.043	0.039	0.033
486	0.036	0.045	0.043	0.043	0.042	0.038	0.032
487	0.035	0.045	0.042	0.043	0.042	0.038	0.032
488	0.035	0.045	0.041	0.042	0.041	0.037	0.031
489	0.034	0.044	0.041	0.042	0.04	0.036	0.031
490	0.034	0.043	0.04	0.041	0.04	0.036	0.03
491	0.033	0.043	0.04	0.041	0.039	0.036	0.03
492	0.033	0.042	0.039	0.04	0.039	0.035	0.03
493	0.034	0.044	0.04	0.041	0.04	0.036	0.03
494	0.034	0.043	0.039	0.04	0.039	0.036	0.029
495	0.033	0.042	0.038	0.04	0.039	0.035	0.029
496	0.032	0.042	0.038	0.039	0.038	0.035	0.028
497	0.032	0.041	0.037	0.039	0.038	0.035	0.028
498	0.032	0.041	0.037	0.038	0.037	0.034	0.027
499	0.031	0.04	0.036	0.038	0.037	0.034	0.027
500	0.031	0.04	0.036	0.037	0.037	0.033	0.026
501	0.031	0.04	0.035	0.037	0.036	0.033	0.026
502	0.03	0.039	0.035	0.037	0.036	0.033	0.026
503	0.03	0.039	0.035	0.036	0.036	0.033	0.025
504	0.03	0.039	0.034	0.036	0.035	0.033	0.025
505	0.029	0.038	0.034	0.036	0.035	0.032	0.025
506	0.029	0.038	0.034	0.036	0.035	0.032	0.025
507	0.029	0.038	0.033	0.035	0.034	0.032	0.024
508	0.028	0.037	0.033	0.035	0.034	0.031	0.024
509	0.028	0.037	0.033	0.035	0.034	0.031	0.024
510	0.027	0.036	0.032	0.034	0.033	0.031	0.024
511	0.027	0.036	0.032	0.034	0.033	0.03	0.023
512	0.027	0.036	0.031	0.033	0.032	0.03	0.023
513	0.026	0.035	0.031	0.033	0.032	0.03	0.023
514	0.026	0.035	0.03	0.032	0.032	0.029	0.022
515	0.025	0.034	0.03	0.032	0.031	0.029	0.022
516	0.025	0.033	0.029	0.031	0.031	0.028	0.021
517	0.024	0.033	0.029	0.031	0.03	0.028	0.021
518	0.023	0.032	0.028	0.03	0.029	0.027	0.02
519	0.023	0.032	0.028	0.03	0.029	0.027	0.02
520	0.022	0.031	0.028	0.03	0.029	0.027	0.019
521	0.022	0.031	0.027	0.029	0.028	0.026	0.019
522	0.022	0.031	0.027	0.029	0.028	0.026	0.019
523	0.022	0.03	0.027	0.028	0.028	0.026	0.019
524	0.022	0.03	0.026	0.028	0.027	0.025	0.019
525	0.022	0.03	0.026	0.028	0.027	0.025	0.019
526	0.022	0.03	0.026	0.028	0.027	0.025	0.019
527	0.022	0.03	0.026	0.028	0.027	0.025	0.019
528	0.022	0.03	0.026	0.027	0.027	0.025	0.02
529	0.022	0.03	0.026	0.027	0.027	0.025	0.02
530	0.022	0.03	0.025	0.027	0.027	0.024	0.02
531	0.022	0.03	0.025	0.027	0.027	0.024	0.02
532	0.022	0.03	0.025	0.027	0.027	0.024	0.02
533	0.022	0.03	0.025	0.027	0.027	0.024	0.019
534	0.022	0.03	0.024	0.027	0.026	0.024	0.019
535	0.022	0.029	0.024	0.026	0.026	0.024	0.019
536	0.022	0.029	0.024	0.026	0.026	0.023	0.019
537	0.021	0.029	0.024	0.026	0.026	0.023	0.019
538	0.021	0.029	0.024	0.026	0.026	0.023	0.019
539	0.021	0.029	0.024	0.026	0.026	0.023	0.019
540	0.021	0.029	0.023	0.026	0.026	0.023	0.019
541	0.021	0.028	0.023	0.026	0.026	0.023	0.018
542	0.02	0.028	0.023	0.025	0.026	0.023	0.018
543	0.02	0.028	0.023	0.025	0.026	0.023	0.018
544	0.02	0.028	0.023	0.025	0.025	0.023	0.018
545	0.02	0.028	0.023	0.025	0.025	0.022	0.018
546	0.02	0.027	0.022	0.025	0.025	0.022	0.018
547	0.02	0.027	0.022	0.025	0.025	0.022	0.017
548	0.02	0.027	0.022	0.025	0.025	0.022	0.017
549	0.019	0.027	0.022	0.025	0.025	0.022	0.017
550	0.019	0.027	0.022	0.025	0.025	0.022	0.017
551	0.019	0.027	0.022	0.025	0.025	0.022	0.017
552	0.019	0.026	0.022	0.025	0.025	0.022	0.017
553	0.019	0.026	0.021	0.024	0.025	0.022	0.017
554	0.019	0.026	0.021	0.024	0.024	0.022	0.016
555	0.018	0.026	0.021	0.024	0.024	0.022	0.016
556	0.018	0.026	0.021	0.024	0.024	0.021	0.016
557	0.018	0.025	0.021	0.024	0.024	0.021	0.015
558	0.018	0.025	0.021	0.024	0.024	0.021	0.015
559	0.018	0.025	0.02	0.024	0.024	0.021	0.015
560	0.017	0.025	0.02	0.023	0.024	0.021	0.015
561	0.017	0.025	0.02	0.023	0.023	0.021	0.015
562	0.017	0.024	0.02	0.023	0.023	0.021	0.015
563	0.017	0.024	0.02	0.023	0.023	0.021	0.014
564	0.017	0.024	0.02	0.023	0.023	0.02	0.014
565	0.016	0.024	0.019	0.023	0.023	0.02	0.014
566	0.016	0.024	0.019	0.023	0.023	0.02	0.014
567	0.016	0.023	0.019	0.022	0.022	0.02	0.014
568	0.016	0.023	0.019	0.022	0.022	0.02	0.014
569	0.016	0.023	0.019	0.022	0.022	0.02	0.014
570	0.015	0.023	0.018	0.022	0.022	0.02	0.014
571	0.015	0.023	0.018	0.022	0.022	0.019	0.013
572	0.015	0.023	0.018	0.022	0.022	0.019	0.013
573	0.015	0.022	0.018	0.022	0.022	0.019	0.013
574	0.015	0.022	0.018	0.022	0.022	0.019	0.013
575	0.015	0.022	0.018	0.021	0.021	0.019	0.013
576	0.014	0.022	0.017	0.021	0.021	0.019	0.013
577	0.014	0.022	0.017	0.021	0.021	0.019	0.012
578	0.014	0.022	0.017	0.021	0.021	0.018	0.012
579	0.014	0.021	0.017	0.021	0.021	0.018	0.012
580	0.014	0.021	0.017	0.021	0.02	0.018	0.012
581	0.014	0.022	0.017	0.021	0.021	0.018	0.012
582	0.014	0.021	0.017	0.021	0.021	0.018	0.012
583	0.013	0.021	0.017	0.021	0.02	0.018	0.011
584	0.013	0.021	0.016	0.021	0.02	0.018	0.011
585	0.013	0.021	0.017	0.02	0.02	0.018	0.011
586	0.013	0.021	0.016	0.02	0.02	0.018	0.011
587	0.013	0.02	0.016	0.02	0.02	0.017	0.011
588	0.013	0.02	0.016	0.02	0.02	0.017	0.011
589	0.012	0.02	0.016	0.02	0.02	0.017	0.011
590	0.012	0.02	0.016	0.02	0.02	0.017	0.011
591	0.012	0.02	0.015	0.02	0.019	0.017	0.011
592	0.012	0.02	0.015	0.019	0.019	0.017	0.011
593	0.012	0.019	0.015	0.019	0.019	0.017	0.01
594	0.011	0.019	0.015	0.019	0.019	0.016	0.01
595	0.011	0.019	0.015	0.019	0.019	0.016	0.01
596	0.011	0.019	0.015	0.019	0.018	0.016	0.01
597	0.011	0.019	0.014	0.019	0.018	0.016	0.01
598	0.011	0.019	0.014	0.019	0.018	0.016	0.01
599	0.011	0.018	0.014	0.018	0.018	0.016	0.01
600	0.01	0.018	0.014	0.018	0.018	0.016	0.01
601	0.01	0.018	0.014	0.018	0.018	0.015	0.009
602	0.01	0.018	0.014	0.018	0.018	0.015	0.009
603	0.01	0.018	0.014	0.018	0.017	0.015	0.009
604	0.01	0.018	0.014	0.018	0.017	0.015	0.009
605	0.01	0.017	0.013	0.017	0.017	0.015	0.009
606	0.009	0.017	0.013	0.017	0.017	0.015	0.008
607	0.009	0.017	0.013	0.017	0.017	0.015	0.008
608	0.009	0.017	0.013	0.017	0.017	0.015	0.008
609	0.009	0.017	0.013	0.017	0.016	0.014	0.008
610	0.009	0.017	0.013	0.017	0.016	0.014	0.008
611	0.009	0.016	0.012	0.017	0.016	0.014	0.008
612	0.009	0.016	0.012	0.017	0.017	0.014	0.008
613	0.009	0.016	0.012	0.017	0.016	0.014	0.008
614	0.009	0.016	0.012	0.016	0.016	0.014	0.008
615	0.008	0.016	0.012	0.016	0.016	0.014	0.008
616	0.008	0.016	0.012	0.016	0.016	0.014	0.008
617	0.008	0.016	0.012	0.016	0.016	0.013	0.008
618	0.008	0.015	0.012	0.016	0.015	0.013	0.008
619	0.008	0.015	0.011	0.016	0.015	0.013	0.008
620	0.008	0.015	0.011	0.015	0.015	0.013	0.007
621	0.007	0.015	0.011	0.015	0.015	0.013	0.007
622	0.007	0.015	0.011	0.015	0.015	0.013	0.007
623	0.007	0.015	0.011	0.015	0.015	0.013	0.007
624	0.007	0.015	0.011	0.015	0.015	0.012	0.007
625	0.007	0.015	0.01	0.015	0.015	0.012	0.007
626	0.007	0.015	0.01	0.015	0.014	0.012	0.007
627	0.006	0.014	0.01	0.015	0.014	0.012	0.007
628	0.006	0.014	0.01	0.014	0.014	0.012	0.006
629	0.006	0.014	0.01	0.014	0.014	0.012	0.006
630	0.006	0.014	0.01	0.014	0.014	0.012	0.006
631	0.006	0.014	0.01	0.014	0.014	0.011	0.006
632	0.006	0.013	0.01	0.014	0.013	0.011	0.006
633	0.006	0.013	0.009	0.014	0.013	0.011	0.006
634	0.006	0.013	0.009	0.014	0.013	0.011	0.005
635	0.005	0.013	0.009	0.013	0.013	0.011	0.005
636	0.005	0.013	0.009	0.013	0.013	0.011	0.005
637	0.005	0.013	0.009	0.013	0.013	0.011	0.005
638	0.005	0.012	0.009	0.013	0.013	0.011	0.005
639	0.005	0.012	0.009	0.013	0.012	0.01	0.005
640	0.004	0.012	0.008	0.012	0.012	0.01	0.005
641	0.004	0.012	0.008	0.012	0.012	0.01	0.005
642	0.004	0.012	0.008	0.012	0.012	0.01	0.005
643	0.004	0.012	0.008	0.012	0.012	0.01	0.005
644	0.004	0.011	0.008	0.012	0.012	0.01	0.005
645	0.004	0.011	0.008	0.012	0.012	0.01	0.005
646	0.004	0.011	0.008	0.012	0.012	0.01	0.005
647	0.003	0.011	0.007	0.012	0.011	0.009	0.005
648	0.004	0.011	0.007	0.012	0.011	0.009	0.005
649	0.003	0.011	0.007	0.011	0.011	0.009	0.005
650	0.003	0.01	0.007	0.011	0.011	0.009	0.005
651	0.003	0.01	0.007	0.011	0.011	0.009	0.004
652	0.003	0.011	0.007	0.011	0.011	0.009	0.005
653	0.003	0.01	0.007	0.011	0.011	0.008	0.004
654	0.002	0.01	0.006	0.011	0.01	0.008	0.004
655	0.002	0.01	0.006	0.011	0.01	0.008	0.004
656	0.002	0.01	0.006	0.011	0.01	0.008	0.004
657	0.002	0.009	0.006	0.01	0.01	0.008	0.004
658	0.002	0.009	0.006	0.01	0.01	0.008	0.004
659	0.002	0.009	0.006	0.01	0.01	0.008	0.003
660	0.002	0.009	0.006	0.01	0.01	0.007	0.003
661	0.001	0.009	0.006	0.01	0.009	0.007	0.003
662	0.001	0.009	0.005	0.01	0.009	0.007	0.003
663	0.001	0.008	0.005	0.009	0.009	0.007	0.003
664	0.001	0.008	0.005	0.009	0.009	0.007	0.003
665	0.001	0.008	0.005	0.009	0.009	0.007	0.003
666	0.001	0.008	0.005	0.009	0.009	0.007	0.003
667	0.001	0.008	0.005	0.009	0.009	0.006	0.003
668	0.001	0.008	0.005	0.009	0.008	0.006	0.003
669	0.001	0.007	0.004	0.009	0.008	0.006	0.003
670	0.001	0.007	0.004	0.009	0.008	0.006	0.003
671	0	0.007	0.004	0.008	0.008	0.006	0.003
672	0	0.007	0.004	0.008	0.008	0.006	0.003
673	0	0.007	0.004	0.008	0.008	0.006	0.003
674	0	0.007	0.004	0.008	0.008	0.006	0.003
675	0	0.006	0.004	0.008	0.007	0.005	0.003
676	0	0.006	0.004	0.008	0.007	0.005	0.003
677	0	0.006	0.003	0.008	0.007	0.005	0.003
678	-0.001	0.006	0.003	0.007	0.007	0.005	0.002
679	-0.001	0.006	0.003	0.007	0.007	0.005	0.002
680	-0.001	0.006	0.003	0.007	0.007	0.005	0.002
681	-0.001	0.006	0.003	0.007	0.007	0.004	0.002
682	-0.001	0.006	0.003	0.007	0.006	0.004	0.002
683	-0.001	0.005	0.002	0.007	0.006	0.004	0.002
684	-0.002	0.005	0.002	0.006	0.006	0.004	0.002
685	-0.002	0.005	0.002	0.006	0.006	0.004	0.002
686	-0.002	0.005	0.002	0.006	0.006	0.004	0.002
687	-0.002	0.005	0.002	0.006	0.006	0.004	0.002
688	-0.002	0.005	0.002	0.006	0.006	0.004	0.002
689	-0.002	0.004	0.002	0.006	0.006	0.003	0.002
690	-0.002	0.004	0.002	0.006	0.006	0.003	0.002
691	-0.002	0.004	0.002	0.006	0.005	0.003	0.001
692	-0.002	0.004	0.002	0.006	0.005	0.003	0.001
693	-0.002	0.004	0.001	0.005	0.005	0.003	0.001
694	-0.003	0.004	0.001	0.005	0.005	0.003	0.001
695	-0.003	0.004	0.001	0.005	0.005	0.003	0.001
696	-0.003	0.004	0.001	0.005	0.005	0.002	0.001
697	-0.003	0.003	0.001	0.005	0.005	0.003	0.001
698	-0.003	0.003	0.001	0.005	0.004	0.002	0.001
699	-0.003	0.003	0.001	0.005	0.004	0.002	0.001
700	-0.003	0.003	0	0.004	0.004	0.002	0.001
701
702
703
704
705
706
707
708
709
710
711
712
713
714
715
716
717
718
719
720
721
722
723
724
725
726
727
728
729
730
731
732
733
734
735
736
737
738
739
740
741
742
743
744
745
746
747
748
749
750
751
752
753
754
755
756
757
758
759
760
761
762
763
764
765
766
767
768
769
770
771
772
773
774
775
776
777
778
779
780
781
782
783
784
785
786
787
788
789
790
791
792
793
794
795
796
797
798
799
800

## Sheet: Figure 6 (b)
F
365	80	365	89	365	69	365	61	365	68	365	60
366	91	366	80	366	77	366	86	366	71	366	61
367	81	367	96	367	67	367	57	367	76	367	54
368	85	368	101	368	79	368	64	368	77	368	66
369	81	369	89	369	81	369	82	369	78	369	77
370	92	370	103	370	86	370	91	370	81	370	70
371	95	371	106	371	79	371	92	371	87	371	92
372	103	372	104	372	99	372	111	372	94	372	75
373	100	373	116	373	106	373	103	373	72	373	105
374	107	374	126	374	115	374	105	374	85	374	126
375	134	375	149	375	145	375	108	375	107	375	133
376	121	376	172	376	155	376	130	376	124	376	140
377	140	377	213	377	176	377	171	377	164	377	177
378	156	378	237	378	204	378	192	378	181	378	202
379	183	379	291	379	222	379	208	379	183	379	232
380	200	380	280	380	237	380	261	380	195	380	260
381	193	381	352	381	334	381	308	381	252	381	315
382	288	382	430	382	368	382	363	382	316	382	387
383	283	383	511	383	445	383	412	383	357	383	459
384	343	384	609	384	539	384	534	384	468	384	603
385	395	385	704	385	603	385	612	385	566	385	713
386	522	386	832	386	750	386	751	386	669	386	782
387	618	387	953	387	871	387	894	387	775	387	968
388	712	388	1169	388	1061	388	1073	388	933	388	1147
389	879	389	1390	389	1158	389	1204	389	1068	389	1365
390	1031	390	1605	390	1456	390	1393	390	1291	390	1561
391	1225	391	1853	391	1739	391	1690	391	1547	391	1840
392	1568	392	2247	392	1957	392	1984	392	1798	392	2197
393	1848	393	2608	393	2388	393	2410	393	2084	393	2567
394	2295	394	3124	394	2809	394	2748	394	2447	394	2924
395	2733	395	3587	395	3279	395	3151	395	2784	395	3385
396	3199	396	4117	396	3794	396	3766	396	3349	396	3849
397	3912	397	4828	397	4442	397	4313	397	3819	397	4368
398	4634	398	5516	398	5031	398	4854	398	4408	398	4906
399	5276	399	6464	399	5914	399	5571	399	4952	399	5555
400	6267	400	7102	400	6512	400	6296	400	5698	400	6240
401	7000	401	8026	401	7250	401	7113	401	6247	401	6801
402	8037	402	9001	402	8359	402	7844	402	6902	402	7670
403	9163	403	9899	403	9206	403	8652	403	7846	403	8547
404	10398	404	10975	404	10185	404	9380	404	8512	404	9313
405	11765	405	12266	405	11046	405	10370	405	9428	405	10191
406	12929	406	13142	406	12168	406	11425	406	10043	406	10665
407	14132	407	14387	407	13167	407	12287	407	11057	407	11637
408	15290	408	15856	408	14106	408	13381	408	12204	408	12464
409	16718	409	16678	409	15339	409	14345	409	12883	409	13258
410	18213	410	18050	410	16430	410	15469	410	13810	410	14073
411	19529	411	19217	411	17495	411	16353	411	14765	411	15203
412	21042	412	20278	412	18307	412	17239	412	15495	412	15659
413	22316	413	21196	413	19499	413	18328	413	16318	413	16580
414	23731	414	22578	414	20502	414	19337	414	17218	414	17484
415	25062	415	23944	415	21640	415	20305	415	18009	415	18243
416	26379	416	24754	416	22727	416	21278	416	18967	416	19025
417	27658	417	26205	417	23732	417	22077	417	19797	417	19930
418	28887	418	27138	418	24813	418	22995	418	20815	418	20543
419	30440	419	28243	419	25509	419	23781	419	21421	419	21294
420	31386	420	29340	420	26090	420	25091	420	22172	420	21927
421	32932	421	29993	421	27909	421	25307	421	23134	421	23137
422	34310	422	31235	422	28447	422	26733	422	23782	422	23857
423	35299	423	32250	423	29577	423	27308	423	24346	423	23938
424	36522	424	33216	424	30192	424	28038	424	24943	424	24687
425	37372	425	33885	425	31026	425	28814	425	25635	425	25250
426	38694	426	34931	426	31752	426	29385	426	26654	426	25623
427	40131	427	35860	427	32960	427	30407	427	27310	427	26947
428	40870	428	36920	428	33574	428	30985	428	27946	428	26890
429	41895	429	37410	429	33984	429	31658	429	28430	429	27531
430	42753	430	37971	430	34497	430	32085	430	28780	430	28010
431	43566	431	38789	431	35465	431	32837	431	29148	431	28639
432	44196	432	39150	432	35960	432	33366	432	29774	432	28743
433	45129	433	40638	433	36496	433	34020	433	32186	433	29041
434	45868	434	40581	434	36814	434	34456	434	30699	434	29743
435	46425	435	41329	435	37500	435	34904	435	31383	435	29705
436	47711	436	41630	436	37798	436	34979	436	31504	436	30344
437	47991	437	42391	437	38073	437	35835	437	32130	437	30502
438	49011	438	42675	438	39161	438	36019	438	32519	438	30537
439	48832	439	43134	439	38896	439	36471	439	32741	439	30674
440	50028	440	43425	440	39478	440	36312	440	32472	440	30661
441	50462	441	43790	441	39910	441	36917	441	33275	441	30971
442	50760	442	43944	442	39946	442	36744	442	33167	442	31153
443	50866	443	43926	443	40134	443	37508	443	33756	443	31161
444	51579	444	44506	444	40400	444	37779	444	33467	444	31261
445	51877	445	44646	445	40763	445	37815	445	33909	445	31239
446	51581	446	44646	446	41098	446	37611	446	33924	446	31257
447	51811	447	44883	447	40793	447	37585	447	34211	447	31039
448	51772	448	44613	448	40397	448	38096	448	33875	448	31177
449	52111	449	44266	449	40708	449	37746	449	34116	449	31266
450	52046	450	44417	450	40815	450	37777	450	34034	450	30510
451	52254	451	43935	451	40512	451	37625	451	33512	451	30989
452	52155	452	43702	452	39942	452	37765	452	33683	452	30253
453	51822	453	44131	453	39988	453	37354	453	33200	453	30233
454	51223	454	44160	454	39567	454	37119	454	33160	454	30052
455	51003	455	43069	455	39309	455	36912	455	33058	455	29692
456	51043	456	43207	456	39136	456	36564	456	32655	456	29515
457	51128	457	42967	457	39060	457	36607	457	32021	457	29155
458	50362	458	42264	458	38705	458	35798	458	32182	458	28528
459	49762	459	41687	459	38500	459	35287	459	31784	459	28225
460	49555	460	41521	460	38047	460	35332	460	31661	460	27780
461	49164	461	40887	461	37311	461	34995	461	31070	461	27656
462	48415	462	40334	462	37076	462	34531	462	31103	462	27291
463	48127	463	39846	463	36779	463	34034	463	31003	463	27006
464	47403	464	39621	464	36133	464	33939	464	30261	464	26662
465	46674	465	39229	465	35425	465	33303	465	29616	465	26068
466	46407	466	38328	466	35341	466	32809	466	29545	466	25516
467	45367	467	37755	467	34324	467	32233	467	28868	467	25132
468	44950	468	36998	468	33889	468	31535	468	28454	468	24786
469	44024	469	36017	469	33249	469	30721	469	27716	469	24221
470	43541	470	35440	470	32722	470	30410	470	27632	470	23588
471	42583	471	35109	471	32106	471	29835	471	26648	471	23170
472	41541	472	34738	472	31461	472	29622	472	26462	472	22451
473	41249	473	34023	473	31061	473	29113	473	26040	473	22449
474	40554	474	33254	474	30474	474	28171	474	25537	474	21657
475	39687	475	32624	475	30051	475	28198	475	24931	475	21426
476	39012	476	32056	476	29688	476	27411	476	24447	476	20719
477	38410	477	31360	477	28923	477	26668	477	24203	477	20393
478	37442	478	30869	478	28004	478	26418	478	23539	478	19797
479	36874	479	29977	479	27710	479	25506	479	23233	479	19511
480	36036	480	30011	480	27134	480	25313	480	22752	480	18755
481	35589	481	29080	481	26705	481	24431	481	22359	481	18473
482	35162	482	28438	482	26084	482	24440	482	21491	482	18341
483	34476	483	27740	483	25547	483	23667	483	21116	483	17574
484	33372	484	26930	484	24977	484	23213	484	20552	484	17333
485	32972	485	26768	485	24617	485	23050	485	20178	485	16962
486	31936	486	26103	486	23705	486	22106	486	19745	486	16697
487	31097	487	25354	487	23383	487	21767	487	19360	487	16095
488	30802	488	24877	488	22443	488	21154	488	19093	488	15581
489	30037	489	24481	489	22132	489	20744	489	18742	489	15543
490	29047	490	23939	490	21803	490	20145	490	18370	490	14921
491	28613	491	23339	491	21168	491	19571	491	17639	491	14464
492	27775	492	22434	492	20494	492	18975	492	17196	492	14026
493	27210	493	22027	493	20078	493	18695	493	16530	493	13778
494	26948	494	21419	494	19489	494	18156	494	16322	494	13393
495	26051	495	20730	495	19119	495	17936	495	15867	495	13042
496	25129	496	20516	496	18346	496	17233	496	15477	496	12578
497	24575	497	19870	497	17750	497	16779	497	15172	497	12429
498	23688	498	19271	498	17609	498	16095	498	14936	498	12233
499	23416	499	18728	499	17222	499	15988	499	14448	499	11719
500	22679	500	18120	500	16662	500	15387	500	13955	500	11174
501	21886	501	17698	501	16219	501	15102	501	13473	501	10991
502	21311	502	16990	502	15676	502	14605	502	13392	502	10312
503	20778	503	17008	503	15205	503	14239	503	12837	503	10268
504	20349	504	16255	504	14873	504	13745	504	12328	504	9953
505	19913	505	15809	505	14315	505	13332	505	11942	505	9577
506	19139	506	15120	506	13932	506	12991	506	11812	506	9285
507	18664	507	14820	507	13724	507	12668	507	11564	507	9142
508	18162	508	14565	508	13242	508	12108	508	11068	508	8781
509	17705	509	14037	509	12914	509	11954	509	10796	509	8536
510	17015	510	13614	510	12528	510	11401	510	10481	510	8182
511	16578	511	13168	511	12244	511	11158	511	10043	511	7938
512	16143	512	12736	512	11864	512	10987	512	9629	512	7762
513	15662	513	12450	513	11450	513	10520	513	9515	513	7342
514	15167	514	11888	514	10912	514	10179	514	9196	514	7090
515	14645	515	11449	515	10733	515	10021	515	8944	515	7112
516	14202	516	11277	516	10329	516	9671	516	8722	516	6756
517	13816	517	10971	517	10169	517	9325	517	8392	517	6583
518	13224	518	10613	518	9524	518	9158	518	8136	518	6465
519	12827	519	10200	519	9458	519	8975	519	7703	519	6232
520	12689	520	9869	520	9127	520	8544	520	7558	520	5946
521	12288	521	9482	521	8837	521	8399	521	7523	521	5702
522	11900	522	9291	522	8619	522	7986	522	7123	522	5499
523	11579	523	9030	523	8394	523	7685	523	6933	523	5421
524	11199	524	8732	524	7970	524	7350	524	6802	524	5169
525	10778	525	8310	525	7745	525	7161	525	6504	525	4883
526	10428	526	8119	526	7577	526	7055	526	6356	526	4921
527	9944	527	7971	527	7414	527	6845	527	6151	527	4649
528	9593	528	7555	528	7018	528	6507	528	5861	528	4579
529	9471	529	7343	529	6900	529	6358	529	5699	529	4373
530	9298	530	7122	530	6607	530	6139	530	5553	530	4181
531	8597	531	7021	531	6297	531	6033	531	5283	531	4111
532	8521	532	6618	532	6165	532	5757	532	5158	532	3954
533	8276	533	6522	533	5978	533	5694	533	4876	533	3724
534	7830	534	6191	534	5767	534	5284	534	4980	534	3645
535	7528	535	5968	535	5488	535	5292	535	4626	535	3472
536	7359	536	5829	536	5467	536	5104	536	4425	536	3436
537	7070	537	5625	537	5131	537	4775	537	4376	537	3344
538	6936	538	5417	538	4979	538	4737	538	4291	538	3212
539	6788	539	5234	539	4967	539	4617	539	4168	539	3007
540	6589	540	5137	540	4789	540	4358	540	3977	540	3124
541	6404	541	4936	541	4581	541	4321	541	3869	541	2784
542	6057	542	4747	542	4398	542	4162	542	3755	542	2662
543	5854	543	4562	543	4264	543	4032	543	3662	543	2618
544	5640	544	4294	544	4103	544	3877	544	3638	544	2565
545	5522	545	4306	545	4048	545	3645	545	3266	545	2472
546	5329	546	4030	546	3844	546	3653	546	3241	546	2439
547	5090	547	3880	547	3687	547	3432	547	3100	547	2287
548	5041	548	3756	548	3581	548	3414	548	2959	548	2221
549	4807	549	3656	549	3402	549	3201	549	2836	549	2105
550	4605	550	3586	550	3298	550	3121	550	2787	550	2134
551	4411	551	3572	551	3242	551	3080	551	2741	551	1972
552	4324	552	3272	552	3189	552	2942	552	2571	552	2008
553	4098	553	3195	553	3026	553	2749	553	2627	553	1858
554	4138	554	3168	554	2959	554	2742	554	2504	554	1840
555	3791	555	2961	555	2717	555	2575	555	2346	555	1779
556	3797	556	2910	556	2622	556	2528	556	2337	556	1740
557	3542	557	2768	557	2605	557	2459	557	2325	557	1617
558	3426	558	2732	558	2520	558	2220	558	2175	558	1534
559	3310	559	2647	559	2414	559	2313	559	2104	559	1533
560	3297	560	2530	560	2403	560	2147	560	1995	560	1477
561	3201	561	2463	561	2288	561	2246	561	1929	561	1418
562	2897	562	2454	562	2237	562	2137	562	1876	562	1409
563	3013	563	2322	563	2101	563	2011	563	1818	563	1247
564	2813	564	2166	564	2173	564	1835	564	1674	564	1249
565	2703	565	2069	565	2068	565	1864	565	1716	565	1290
566	2598	566	2111	566	1910	566	1832	566	1665	566	1263
567	2501	567	2008	567	1852	567	1773	567	1628	567	1165
568	2451	568	1991	568	1797	568	1783	568	1532	568	1157
569	2427	569	1904	569	1774	569	1685	569	1490	569	1082
570	2294	570	1729	570	1668	570	1550	570	1434	570	1012
571	2256	571	1806	571	1676	571	1587	571	1428	571	1017
572	2228	572	1656	572	1622	572	1499	572	1315	572	981
573	2152	573	1609	573	1604	573	1437	573	1333	573	909
574	2086	574	1505	574	1601	574	1447	574	1289	574	974
575	2013	575	1516	575	1443	575	1298	575	1274	575	890
576	1928	576	1422	576	1410	576	1342	576	1176	576	869
577	1863	577	1491	577	1350	577	1214	577	1152	577	866
578	1810	578	1425	578	1355	578	1267	578	1111	578	758
579	1772	579	1407	579	1290	579	1200	579	1042	579	823
580	1768	580	1245	580	1288	580	1085	580	1085	580	799
581	1607	581	1319	581	1247	581	1130	581	958	581	734
582	1629	582	1254	582	1143	582	1056	582	990	582	712
583	1510	583	1189	583	1117	583	1122	583	968	583	744
584	1483	584	1205	584	1084	584	1052	584	940	584	700
585	1484	585	1151	585	1037	585	1021	585	897	585	652
586	1410	586	1109	586	1029	586	995	586	869	586	581
587	1376	587	1018	587	995	587	901	587	809	587	589
588	1310	588	984	588	956	588	895	588	811	588	581
589	1344	589	942	589	930	589	939	589	732	589	600
590	1323	590	985	590	872	590	860	590	791	590	563
591	1142	591	977	591	899	591	835	591	791	591	551
592	1212	592	904	592	842	592	832	592	709	592	535
593	1126	593	866	593	794	593	757	593	720	593	498
594	1104	594	879	594	786	594	744	594	675	594	495
595	1123	595	790	595	795	595	699	595	631	595	491
596	1072	596	827	596	781	596	743	596	662	596	457
597	996	597	787	597	694	597	673	597	632	597	438
598	973	598	782	598	692	598	694	598	630	598	446
599	920	599	745	599	727	599	677	599	627	599	421
600	904	600	738	600	651	600	656	600	593	600	379
601	796	601	665	601	632	601	600	601	530	601	390
602	908	602	637	602	592	602	599	602	548	602	382
603	822	603	656	603	589	603	540	603	518	603	342
604	765	604	619	604	590	604	574	604	499	604	356
605	803	605	589	605	593	605	523	605	491	605	323
606	764	606	581	606	583	606	552	606	484	606	308
607	691	607	584	607	545	607	518	607	442	607	377
608	730	608	537	608	518	608	513	608	446	608	329
609	695	609	539	609	537	609	494	609	441	609	297
610	672	610	552	610	462	610	484	610	408	610	254
611	604	611	500	611	482	611	440	611	387	611	270
612	602	612	494	612	429	612	443	612	423	612	277
613	590	613	513	613	439	613	424	613	398	613	280
614	587	614	432	614	397	614	425	614	371	614	281
615	582	615	436	615	415	615	388	615	343	615	277
616	573	616	395	616	415	616	369	616	344	616	238
617	539	617	405	617	432	617	354	617	366	617	258
618	536	618	376	618	401	618	389	618	333	618	228
619	511	619	393	619	378	619	354	619	318	619	234
620	453	620	385	620	368	620	341	620	283	620	244
621	471	621	399	621	337	621	339	621	333	621	216
622	440	622	347	622	353	622	320	622	301	622	211
623	425	623	349	623	303	623	312	623	279	623	200
624	417	624	325	624	309	624	318	624	263	624	204
625	460	625	335	625	292	625	285	625	299	625	203
626	424	626	289	626	265	626	308	626	262	626	172
627	386	627	314	627	262	627	265	627	242	627	160
628	379	628	295	628	295	628	286	628	229	628	195
629	346	629	309	629	266	629	269	629	247	629	154
630	373	630	279	630	240	630	271	630	218	630	142
631	343	631	243	631	241	631	254	631	215	631	161
632	365	632	263	632	272	632	236	632	222	632	149
633	343	633	241	633	242	633	249	633	214	633	152
634	318	634	209	634	233	634	228	634	211	634	153
635	286	635	215	635	265	635	201	635	191	635	147
636	260	636	261	636	223	636	232	636	215	636	154
637	290	637	240	637	228	637	205	637	197	637	117
638	291	638	197	638	228	638	207	638	208	638	145
639	277	639	247	639	211	639	185	639	178	639	115
640	274	640	196	640	211	640	185	640	180	640	119
641	258	641	215	641	225	641	196	641	185	641	115
642	255	642	197	642	191	642	185	642	186	642	120
643	252	643	196	643	185	643	182	643	165	643	122
644	228	644	214	644	181	644	174	644	172	644	102
645	263	645	193	645	202	645	161	645	166	645	105
646	223	646	206	646	163	646	184	646	161	646	126
647	232	647	183	647	166	647	166	647	154	647	104
648	215	648	188	648	192	648	195	648	169	648	95
649	250	649	174	649	167	649	172	649	130	649	127
650	198	650	178	650	173	650	165	650	147	650	94
651	206	651	176	651	170	651	164	651	158	651	85
652	200	652	150	652	149	652	143	652	150	652	128
653	231	653	158	653	151	653	125	653	145	653	96
654	218	654	158	654	174	654	152	654	123	654	102
655	194	655	144	655	141	655	144	655	131	655	99
656	193	656	153	656	168	656	124	656	127	656	88
657	184	657	150	657	145	657	129	657	130	657	71
658	192	658	132	658	132	658	153	658	127	658	92
659	163	659	129	659	140	659	145	659	136	659	80
660	157	660	149	660	147	660	126	660	111	660	76
661	160	661	141	661	132	661	117	661	106	661	81
662	173	662	133	662	129	662	119	662	115	662	74
663	141	663	140	663	136	663	122	663	115	663	66
664	168	664	111	664	123	664	117	664	115	664	67
665	174	665	118	665	102	665	107	665	119	665	74
666	143	666	123	666	120	666	114	666	88	666	74
667	149	667	103	667	105	667	106	667	102	667	63
668	120	668	126	668	111	668	95	668	100	668	51
669	147	669	96	669	118	669	87	669	82	669	39
670	150	670	105	670	109	670	107	670	81	670	73
671	130	671	114	671	93	671	102	671	102	671	68
672	121	672	108	672	94	672	87	672	106	672	52
673	150	673	97	673	102	673	100	673	73	673	66
674	120	674	100	674	88	674	89	674	85	674	62
675	120	675	88	675	83	675	96	675	87	675	74
676	140	676	100	676	101	676	100	676	98	676	61
677	113	677	91	677	105	677	94	677	71	677	53
678	116	678	93	678	79	678	104	678	85	678	60
679	129	679	94	679	74	679	72	679	87	679	46
680	117	680	75	680	104	680	84	680	68	680	62

## Sheet: Figure 6 (c)
200	3.472	3.325	3.661	3.863	3.358	3.764	3.65789
201	3.314	3.2	3.542	3.748	3.309	3.612	3.56689
202	3.167	3.074	3.424	3.596	3.238	3.454	3.49289
203	3.042	2.966	3.318	3.468	3.195	3.323	3.40789
204	2.929	2.861	3.209	3.352	3.131	3.203	3.32089
205	2.834	2.773	3.12	3.26	3.089	3.106	3.24989
206	2.768	2.708	3.055	3.18	3.034	3.03	3.18689
207	2.706	2.657	3.01	3.129	3.005	2.973	3.14189
208	2.677	2.631	2.976	3.099	2.982	2.939	3.10389
209	2.647	2.607	2.961	3.078	2.955	2.916	3.07989
210	2.631	2.581	2.939	3.045	2.941	2.894	3.05189
211	2.605	2.565	2.907	3.021	2.921	2.869	3.03889
212	2.594	2.555	2.897	3.012	2.914	2.861	3.01989
213	2.597	2.555	2.901	3.014	2.917	2.861	3.01889
214	2.616	2.575	2.936	3.039	2.929	2.884	3.03689
215	2.638	2.597	2.968	3.069	2.932	2.908	3.05489
216	2.649	2.603	2.97	3.076	2.941	2.916	3.05689
217	2.651	2.604	2.974	3.093	2.942	2.92	3.06189
218	2.669	2.621	2.991	3.105	2.95	2.935	3.06589
219	2.685	2.637	3.017	3.122	2.958	2.958	3.08089
220	2.719	2.667	3.053	3.174	2.973	2.994	3.10289
221	2.759	2.708	3.109	3.232	2.998	3.038	3.13589
222	2.785	2.733	3.133	3.262	3.014	3.066	3.14689
223	2.814	2.747	3.166	3.288	3.023	3.092	3.16989
224	2.85	2.787	3.21	3.337	3.045	3.134	3.19689
225	2.891	2.826	3.251	3.395	3.06	3.191	3.21089
226	2.917	2.841	3.287	3.434	3.069	3.207	3.22689
227	2.94	2.864	3.314	3.468	3.077	3.245	3.23289
228	2.976	2.895	3.356	3.509	3.08	3.274	3.26389
229	3.005	2.922	3.388	3.545	3.093	3.317	3.27289
230	3.035	2.947	3.424	3.585	3.101	3.343	3.28789
231	3.053	2.967	3.456	3.623	3.101	3.374	3.29489
232	3.085	2.978	3.477	3.628	3.108	3.407	3.29689
233	3.096	3	3.515	3.674	3.116	3.426	3.31789
234	3.104	3.003	3.516	3.682	3.107	3.423	3.30289
235	3.106	3.006	3.517	3.684	3.109	3.436	3.29589
236	3.1	2.998	3.51	3.692	3.097	3.434	3.30289
237	3.075	2.972	3.508	3.652	3.09	3.413	3.29289
238	3.053	2.965	3.497	3.641	3.084	3.383	3.28889
239	3.028	2.94	3.487	3.627	3.078	3.358	3.27189
240	3	2.921	3.445	3.575	3.072	3.317	3.25689
241	2.955	2.876	3.404	3.536	3.06	3.262	3.22689
242	2.895	2.822	3.344	3.48	3.029	3.19	3.21189
243	2.814	2.751	3.269	3.394	3.012	3.105	3.16789
244	2.717	2.657	3.177	3.286	2.963	2.999	3.10289
245	2.602	2.555	3.039	3.151	2.914	2.873	3.02789
246	2.479	2.441	2.888	2.976	2.841	2.741	2.92489
247	2.337	2.307	2.712	2.792	2.739	2.592	2.79689
248	2.193	2.165	2.514	2.597	2.609	2.438	2.64389
249	2.051	2.024	2.33	2.399	2.454	2.285	2.47189
250	1.902	1.878	2.136	2.202	2.282	2.128	2.28589
251	1.765	1.745	1.968	2.022	2.118	1.986	2.11789
252	1.648	1.627	1.824	1.872	1.973	1.864	1.96889
253	1.542	1.52	1.698	1.743	1.843	1.754	1.83589
254	1.45	1.429	1.587	1.632	1.729	1.653	1.72089
255	1.369	1.347	1.49	1.533	1.628	1.563	1.61889
256	1.294	1.273	1.404	1.444	1.536	1.479	1.52789
257	1.224	1.203	1.322	1.361	1.447	1.402	1.43989
258	1.159	1.139	1.251	1.286	1.368	1.331	1.36089
259	1.099	1.081	1.185	1.218	1.294	1.264	1.28789
260	1.043	1.027	1.123	1.154	1.227	1.202	1.21889
261	0.994	0.979	1.068	1.097	1.167	1.145	1.15789
262	0.941	0.924	1.015	1.048	1.118	1.083	1.11189
263	0.899	0.883	0.97	1	1.066	1.034	1.05789
264	0.86	0.844	0.927	0.956	1.019	0.989	1.01089
265	0.825	0.811	0.888	0.917	0.976	0.949	0.96889
266	0.792	0.778	0.851	0.878	0.934	0.909	0.92689
267	0.76	0.748	0.817	0.843	0.896	0.873	0.88789
268	0.731	0.721	0.786	0.811	0.862	0.839	0.85189
269	0.705	0.695	0.757	0.78	0.828	0.807	0.81889
270	0.679	0.67	0.729	0.751	0.796	0.777	0.78789
271	0.656	0.647	0.703	0.725	0.768	0.75	0.75889
272	0.635	0.628	0.681	0.701	0.742	0.724	0.73289
273	0.614	0.609	0.659	0.679	0.716	0.7	0.70789
274	0.596	0.59	0.638	0.658	0.693	0.677	0.68489
275	0.578	0.574	0.619	0.638	0.672	0.656	0.66389
276	0.562	0.559	0.602	0.62	0.653	0.637	0.64389
277	0.549	0.545	0.586	0.604	0.635	0.62	0.62589
278	0.535	0.533	0.574	0.589	0.619	0.603	0.60989
279	0.522	0.522	0.559	0.576	0.604	0.589	0.59489
280	0.511	0.51	0.547	0.563	0.59	0.575	0.58089
281	0.5	0.5	0.535	0.55	0.575	0.561	0.56689
282	0.49	0.49	0.524	0.539	0.563	0.549	0.55489
283	0.48	0.481	0.514	0.529	0.551	0.538	0.54289
284	0.471	0.473	0.504	0.519	0.54	0.527	0.53189
285	0.462	0.464	0.494	0.51	0.529	0.516	0.52089
286	0.454	0.456	0.486	0.499	0.519	0.505	0.51089
287	0.447	0.45	0.478	0.492	0.51	0.497	0.50189
288	0.438	0.442	0.47	0.483	0.502	0.488	0.49289
289	0.432	0.436	0.463	0.476	0.493	0.479	0.48489
290	0.426	0.43	0.456	0.469	0.485	0.472	0.47689
291	0.419	0.425	0.45	0.463	0.479	0.466	0.47089
292	0.414	0.42	0.444	0.457	0.472	0.459	0.46489
293	0.409	0.416	0.44	0.453	0.467	0.453	0.45889
294	0.405	0.41	0.434	0.447	0.461	0.448	0.45389
295	0.4	0.408	0.43	0.443	0.457	0.443	0.44889
296	0.397	0.404	0.427	0.44	0.453	0.439	0.44489
297	0.394	0.402	0.424	0.436	0.449	0.435	0.44289
298	0.391	0.398	0.421	0.434	0.445	0.432	0.43989
299	0.388	0.396	0.418	0.431	0.443	0.429	0.43689
300	0.386	0.394	0.416	0.428	0.44	0.427	0.43489
301	0.385	0.392	0.414	0.427	0.438	0.425	0.43289
302	0.382	0.39	0.412	0.425	0.436	0.422	0.43089
303	0.381	0.389	0.41	0.424	0.434	0.421	0.42889
304	0.379	0.388	0.408	0.422	0.433	0.42	0.42889
305	0.377	0.386	0.407	0.422	0.432	0.418	0.42689
306	0.377	0.385	0.407	0.42	0.431	0.418	0.42789
307	0.376	0.385	0.405	0.419	0.43	0.417	0.42689
308	0.374	0.385	0.404	0.418	0.429	0.418	0.42689
309	0.373	0.383	0.404	0.419	0.429	0.418	0.42689
310	0.373	0.382	0.403	0.418	0.429	0.418	0.42789
311	0.371	0.381	0.403	0.417	0.428	0.418	0.42689
312	0.371	0.381	0.402	0.418	0.429	0.419	0.42789
313	0.37	0.38	0.402	0.417	0.429	0.42	0.42889
314	0.37	0.379	0.401	0.417	0.429	0.421	0.42889
315	0.369	0.379	0.4	0.417	0.43	0.422	0.42989
316	0.368	0.378	0.4	0.417	0.43	0.423	0.43089
317	0.368	0.378	0.4	0.417	0.431	0.425	0.43289
318	0.367	0.377	0.4	0.417	0.432	0.426	0.43389
319	0.367	0.377	0.4	0.417	0.433	0.428	0.43589
320	0.368	0.377	0.401	0.418	0.434	0.43	0.43789
321	0.368	0.377	0.401	0.419	0.435	0.432	0.43989
322	0.368	0.377	0.402	0.42	0.437	0.434	0.44189
323	0.369	0.378	0.403	0.421	0.439	0.437	0.44389
324	0.37	0.379	0.404	0.423	0.44	0.439	0.44589
325	0.371	0.381	0.406	0.425	0.444	0.442	0.44989
326	0.372	0.382	0.407	0.427	0.445	0.445	0.45289
327	0.374	0.384	0.409	0.429	0.448	0.448	0.45589
328	0.376	0.386	0.411	0.432	0.451	0.451	0.45889
329	0.382	0.393	0.417	0.439	0.457	0.453	0.46689
330	0.384	0.395	0.419	0.442	0.46	0.457	0.46989
331	0.387	0.397	0.422	0.445	0.463	0.46	0.47389
332	0.389	0.399	0.424	0.447	0.466	0.463	0.47689
333	0.392	0.402	0.426	0.45	0.469	0.466	0.48189
334	0.394	0.404	0.429	0.453	0.472	0.47	0.48589
335	0.396	0.407	0.432	0.456	0.476	0.473	0.48989
336	0.399	0.41	0.435	0.459	0.479	0.476	0.49289
337	0.402	0.413	0.438	0.462	0.483	0.48	0.49789
338	0.405	0.416	0.44	0.466	0.486	0.484	0.50189
339	0.407	0.419	0.443	0.469	0.489	0.487	0.50589
340	0.41	0.422	0.447	0.473	0.494	0.491	0.51089
341	0.413	0.425	0.45	0.476	0.497	0.495	0.51589
342	0.417	0.429	0.454	0.48	0.502	0.499	0.52089
343	0.42	0.432	0.457	0.484	0.506	0.504	0.52589
344	0.423	0.435	0.461	0.488	0.51	0.508	0.52989
345	0.426	0.439	0.464	0.492	0.514	0.512	0.53489
346	0.429	0.442	0.467	0.495	0.518	0.516	0.53989
347	0.432	0.445	0.47	0.499	0.522	0.52	0.54389
348	0.435	0.448	0.473	0.502	0.525	0.524	0.54789
349	0.438	0.451	0.477	0.505	0.529	0.528	0.55289
350	0.441	0.454	0.479	0.508	0.532	0.531	0.55689
351	0.443	0.457	0.482	0.511	0.535	0.534	0.55989
352	0.446	0.46	0.485	0.514	0.538	0.537	0.56389
353	0.448	0.462	0.487	0.517	0.542	0.541	0.56789
354	0.451	0.465	0.49	0.52	0.544	0.544	0.57089
355	0.453	0.467	0.492	0.523	0.547	0.546	0.57389
356	0.455	0.469	0.494	0.525	0.55	0.549	0.57689
357	0.457	0.471	0.496	0.527	0.552	0.551	0.58089
358	0.459	0.473	0.498	0.529	0.554	0.553	0.58289
359	0.46	0.475	0.501	0.531	0.556	0.556	0.58589
360	0.462	0.477	0.502	0.533	0.558	0.558	0.58789
361	0.463	0.479	0.504	0.535	0.56	0.56	0.58989
362	0.465	0.48	0.505	0.537	0.562	0.562	0.59289
363	0.466	0.481	0.506	0.538	0.564	0.563	0.59389
364	0.467	0.482	0.507	0.539	0.565	0.564	0.59489
365	0.468	0.483	0.508	0.54	0.566	0.565	0.59689
366	0.468	0.483	0.508	0.54	0.566	0.566	0.59689
367	0.468	0.483	0.508	0.54	0.565	0.565	0.59689
368	0.467	0.483	0.508	0.539	0.565	0.565	0.59689
369	0.467	0.482	0.507	0.539	0.564	0.565	0.59589
370	0.466	0.481	0.506	0.537	0.563	0.563	0.59489
371	0.465	0.48	0.505	0.536	0.562	0.562	0.59289
372	0.463	0.478	0.503	0.534	0.56	0.56	0.59089
373	0.459	0.474	0.498	0.529	0.555	0.558	0.58589
374	0.457	0.471	0.496	0.526	0.552	0.555	0.58289
375	0.454	0.469	0.493	0.523	0.549	0.552	0.57889
376	0.451	0.465	0.489	0.519	0.545	0.548	0.57489
377	0.447	0.462	0.485	0.515	0.541	0.544	0.56989
378	0.443	0.458	0.482	0.511	0.536	0.539	0.56489
379	0.439	0.453	0.477	0.506	0.531	0.535	0.55889
380	0.435	0.449	0.472	0.501	0.526	0.529	0.55389
381	0.43	0.444	0.467	0.496	0.52	0.523	0.54689
382	0.426	0.439	0.462	0.49	0.514	0.517	0.54089
383	0.42	0.434	0.456	0.484	0.507	0.511	0.53389
384	0.415	0.428	0.45	0.478	0.5	0.504	0.52589
385	0.409	0.422	0.444	0.471	0.493	0.497	0.51789
386	0.403	0.416	0.437	0.464	0.486	0.49	0.50989
387	0.396	0.409	0.43	0.456	0.478	0.482	0.50089
388	0.389	0.402	0.423	0.448	0.47	0.474	0.49189
389	0.382	0.395	0.415	0.44	0.461	0.465	0.48289
390	0.375	0.387	0.407	0.432	0.452	0.456	0.47289
391	0.367	0.38	0.399	0.424	0.443	0.447	0.46289
392	0.36	0.372	0.391	0.415	0.434	0.438	0.45289
393	0.353	0.364	0.383	0.406	0.425	0.429	0.44289
394	0.344	0.356	0.375	0.397	0.415	0.419	0.43189
395	0.337	0.348	0.366	0.388	0.405	0.409	0.42189
396	0.329	0.34	0.358	0.379	0.396	0.4	0.41089
397	0.32	0.332	0.349	0.37	0.386	0.39	0.39989
398	0.312	0.324	0.34	0.36	0.376	0.38	0.38889
399	0.304	0.315	0.331	0.351	0.366	0.37	0.37789
400	0.296	0.307	0.322	0.341	0.356	0.359	0.36689
401	0.287	0.298	0.314	0.332	0.346	0.349	0.35589
402	0.279	0.29	0.304	0.322	0.336	0.339	0.34389
403	0.27	0.281	0.296	0.312	0.325	0.329	0.33289
404	0.262	0.273	0.287	0.303	0.316	0.319	0.32189
405	0.254	0.264	0.278	0.294	0.306	0.309	0.31189
406	0.246	0.256	0.269	0.285	0.296	0.299	0.30089
407	0.238	0.248	0.26	0.275	0.286	0.289	0.28989
408	0.23	0.24	0.252	0.266	0.277	0.279	0.27889
409	0.222	0.232	0.244	0.257	0.267	0.27	0.26889
410	0.214	0.224	0.235	0.248	0.258	0.26	0.25789
411	0.207	0.216	0.228	0.24	0.249	0.251	0.24889
412	0.2	0.209	0.22	0.232	0.24	0.242	0.23889
413	0.192	0.201	0.212	0.223	0.231	0.233	0.22889
414	0.186	0.195	0.205	0.216	0.223	0.225	0.21989
415	0.179	0.188	0.197	0.208	0.215	0.216	0.21089
416	0.172	0.181	0.19	0.2	0.207	0.209	0.20289
417	0.166	0.175	0.184	0.193	0.199	0.201	0.19389
418	0.16	0.169	0.177	0.186	0.192	0.194	0.18589
419	0.153	0.163	0.171	0.179	0.185	0.186	0.17789
420	0.148	0.157	0.165	0.172	0.178	0.179	0.17089
421	0.143	0.152	0.159	0.166	0.172	0.173	0.16389
422	0.138	0.146	0.153	0.16	0.166	0.166	0.15689
423	0.133	0.141	0.148	0.155	0.16	0.16	0.14989
424	0.128	0.136	0.143	0.149	0.154	0.154	0.14389
425	0.123	0.132	0.138	0.144	0.148	0.149	0.13689
426	0.119	0.127	0.133	0.139	0.143	0.144	0.13189
427	0.115	0.123	0.129	0.134	0.138	0.138	0.12589
428	0.111	0.119	0.125	0.13	0.133	0.134	0.12089
429	0.107	0.116	0.121	0.126	0.129	0.129	0.11589
430	0.103	0.112	0.116	0.121	0.124	0.124	0.11089
431	0.1	0.108	0.113	0.118	0.12	0.12	0.10689
432	0.097	0.105	0.11	0.114	0.116	0.116	0.10189
433	0.094	0.102	0.106	0.11	0.112	0.112	0.09789
434	0.091	0.099	0.103	0.107	0.108	0.109	0.09389
435	0.088	0.096	0.1	0.104	0.105	0.105	0.08989
436	0.086	0.093	0.098	0.101	0.102	0.102	0.08689
437	0.084	0.091	0.095	0.099	0.099	0.099	0.08389
438	0.081	0.089	0.092	0.096	0.096	0.096	0.08089
439	0.079	0.087	0.09	0.093	0.094	0.094	0.07789
440	0.077	0.085	0.088	0.091	0.091	0.091	0.07589
441	0.075	0.083	0.086	0.089	0.089	0.089	0.07289
442	0.073	0.081	0.084	0.087	0.087	0.087	0.07089
443	0.072	0.08	0.083	0.085	0.085	0.085	0.06889
444	0.07	0.078	0.081	0.083	0.083	0.083	0.06689
445	0.069	0.076	0.079	0.082	0.081	0.081	0.06489
446	0.067	0.075	0.078	0.08	0.08	0.079	0.06289
447	0.066	0.074	0.076	0.078	0.078	0.077	0.06089
448	0.065	0.072	0.075	0.077	0.077	0.076	0.05989
449	0.064	0.071	0.074	0.076	0.075	0.075	0.05789
450	0.062	0.07	0.073	0.075	0.074	0.073	0.05689
451	0.061	0.069	0.071	0.073	0.073	0.072	0.05489
452	0.06	0.068	0.07	0.072	0.071	0.071	0.05389
453	0.059	0.067	0.069	0.071	0.07	0.07	0.05289
454	0.058	0.066	0.068	0.07	0.069	0.069	0.05189
455	0.057	0.065	0.067	0.069	0.068	0.067	0.04989
456	0.056	0.064	0.066	0.068	0.067	0.066	0.04889
457	0.055	0.063	0.065	0.067	0.066	0.065	0.04789
458	0.054	0.062	0.064	0.066	0.065	0.064	0.04689
459	0.054	0.061	0.063	0.065	0.064	0.063	0.04589
460	0.053	0.06	0.062	0.064	0.063	0.062	0.04489
461	0.052	0.06	0.061	0.063	0.062	0.061	0.04389
462	0.051	0.059	0.061	0.062	0.061	0.06	0.04289
463	0.05	0.058	0.06	0.061	0.06	0.06	0.04189
464	0.049	0.057	0.059	0.06	0.059	0.059	0.04089
465	0.049	0.056	0.058	0.06	0.058	0.058	0.03989
466	0.048	0.056	0.057	0.059	0.057	0.057	0.03989
467	0.047	0.055	0.057	0.058	0.057	0.056	0.03889
468	0.046	0.054	0.056	0.057	0.056	0.056	0.03789
469	0.046	0.054	0.055	0.056	0.055	0.055	0.03689
470	0.045	0.053	0.055	0.056	0.054	0.054	0.03589
471	0.044	0.052	0.054	0.055	0.053	0.053	0.03589
472	0.044	0.052	0.053	0.054	0.053	0.053	0.03489
473	0.043	0.051	0.052	0.054	0.052	0.052	0.03389
474	0.043	0.05	0.052	0.053	0.051	0.051	0.03289
475	0.042	0.05	0.051	0.052	0.051	0.05	0.03289
476	0.041	0.049	0.051	0.052	0.05	0.05	0.03189
477	0.041	0.049	0.05	0.051	0.05	0.05	0.03189
478	0.04	0.048	0.05	0.051	0.049	0.049	0.03089
479	0.04	0.048	0.049	0.05	0.048	0.048	0.02989
480	0.039	0.047	0.048	0.049	0.048	0.047	0.02989
481	0.039	0.047	0.048	0.049	0.047	0.047	0.02889
482	0.038	0.046	0.047	0.048	0.046	0.046	0.02789
483	0.038	0.045	0.047	0.047	0.046	0.046	0.02789
484	0.037	0.045	0.046	0.047	0.045	0.045	0.02689
485	0.036	0.044	0.045	0.046	0.044	0.044	0.02589
486	0.036	0.044	0.045	0.045	0.044	0.044	0.02589
487	0.035	0.043	0.044	0.045	0.043	0.043	0.02489
488	0.035	0.043	0.044	0.045	0.043	0.043	0.02389
489	0.034	0.042	0.043	0.044	0.042	0.042	0.02389
490	0.034	0.042	0.042	0.043	0.042	0.041	0.02289
491	0.033	0.041	0.042	0.043	0.041	0.041	0.02289
492	0.033	0.041	0.042	0.042	0.041	0.04	0.02189
493	0.034	0.043	0.043	0.044	0.042	0.041	0.02289
494	0.034	0.042	0.042	0.043	0.041	0.04	0.02189
495	0.033	0.042	0.042	0.042	0.04	0.04	0.02189
496	0.032	0.041	0.041	0.042	0.04	0.039	0.02089
497	0.032	0.041	0.041	0.041	0.039	0.039	0.02089
498	0.032	0.04	0.04	0.041	0.039	0.038	0.01989
499	0.031	0.04	0.04	0.04	0.038	0.038	0.01989
500	0.031	0.039	0.04	0.04	0.038	0.038	0.01889
501	0.031	0.039	0.039	0.04	0.037	0.037	0.01889
502	0.03	0.039	0.039	0.039	0.037	0.037	0.01889
503	0.03	0.038	0.039	0.039	0.037	0.037	0.01789
504	0.03	0.038	0.038	0.039	0.037	0.036	0.01789
505	0.029	0.038	0.038	0.038	0.036	0.036	0.01789
506	0.029	0.037	0.038	0.038	0.036	0.036	0.01689
507	0.029	0.037	0.038	0.038	0.036	0.035	0.01689
508	0.028	0.037	0.037	0.037	0.035	0.035	0.01689
509	0.028	0.037	0.037	0.037	0.035	0.035	0.01589
510	0.027	0.036	0.036	0.036	0.034	0.034	0.01589
511	0.027	0.036	0.036	0.036	0.034	0.034	0.01489
512	0.027	0.035	0.035	0.036	0.033	0.033	0.01489
513	0.026	0.035	0.035	0.035	0.033	0.033	0.01489
514	0.026	0.034	0.035	0.035	0.033	0.032	0.01389
515	0.025	0.034	0.034	0.034	0.032	0.032	0.01289
516	0.025	0.033	0.034	0.033	0.032	0.031	0.01289
517	0.024	0.033	0.033	0.033	0.031	0.031	0.01289
518	0.023	0.032	0.032	0.032	0.031	0.03	0.01189
519	0.023	0.032	0.032	0.032	0.03	0.03	0.01189
520	0.022	0.031	0.032	0.031	0.03	0.03	0.01089
521	0.022	0.031	0.031	0.031	0.029	0.029	0.01089
522	0.022	0.031	0.031	0.031	0.029	0.029	0.00989
523	0.022	0.03	0.03	0.03	0.029	0.028	0.00989
524	0.022	0.03	0.03	0.03	0.028	0.028	0.00989
525	0.022	0.03	0.03	0.03	0.028	0.028	0.00989
526	0.022	0.03	0.03	0.03	0.028	0.028	0.00889
527	0.022	0.03	0.03	0.03	0.028	0.028	0.00889
528	0.022	0.03	0.03	0.03	0.028	0.027	0.00889
529	0.022	0.03	0.03	0.03	0.027	0.027	0.00889
530	0.022	0.03	0.03	0.03	0.027	0.027	0.00889
531	0.022	0.03	0.03	0.03	0.027	0.027	0.00789
532	0.022	0.03	0.03	0.03	0.027	0.027	0.00789
533	0.022	0.03	0.029	0.03	0.027	0.027	0.00789
534	0.022	0.029	0.029	0.03	0.026	0.026	0.00789
535	0.022	0.029	0.029	0.029	0.026	0.026	0.00789
536	0.022	0.029	0.029	0.029	0.026	0.026	0.00789
537	0.021	0.029	0.029	0.029	0.026	0.026	0.00689
538	0.021	0.029	0.029	0.029	0.026	0.026	0.00689
539	0.021	0.029	0.028	0.029	0.026	0.026	0.00689
540	0.021	0.028	0.028	0.029	0.025	0.026	0.00689
541	0.021	0.028	0.028	0.028	0.025	0.026	0.00589
542	0.02	0.028	0.028	0.028	0.025	0.026	0.00589
543	0.02	0.028	0.028	0.028	0.025	0.025	0.00589
544	0.02	0.028	0.027	0.028	0.025	0.025	0.00589
545	0.02	0.028	0.027	0.028	0.025	0.025	0.00589
546	0.02	0.027	0.027	0.027	0.024	0.025	0.00589
547	0.02	0.027	0.027	0.027	0.024	0.025	0.00589
548	0.02	0.027	0.027	0.027	0.024	0.025	0.00589
549	0.019	0.027	0.027	0.027	0.024	0.025	0.00489
550	0.019	0.027	0.027	0.027	0.024	0.025	0.00489
551	0.019	0.027	0.026	0.027	0.024	0.025	0.00489
552	0.019	0.027	0.026	0.026	0.024	0.025	0.00489
553	0.019	0.027	0.026	0.026	0.024	0.025	0.00489
554	0.019	0.026	0.026	0.026	0.023	0.024	0.00489
555	0.018	0.026	0.026	0.026	0.023	0.024	0.00389
556	0.018	0.026	0.026	0.026	0.023	0.024	0.00389
557	0.018	0.026	0.026	0.025	0.023	0.024	0.00389
558	0.018	0.026	0.026	0.025	0.023	0.024	0.00389
559	0.018	0.025	0.025	0.025	0.023	0.024	0.00389
560	0.017	0.025	0.025	0.025	0.022	0.024	0.00389
561	0.017	0.025	0.025	0.025	0.022	0.023	0.00289
562	0.017	0.025	0.025	0.024	0.022	0.023	0.00289
563	0.017	0.025	0.025	0.024	0.022	0.023	0.00289
564	0.017	0.024	0.024	0.024	0.022	0.023	0.00289
565	0.016	0.024	0.024	0.024	0.022	0.023	0.00289
566	0.016	0.024	0.024	0.024	0.021	0.023	0.00289
567	0.016	0.024	0.024	0.023	0.021	0.023	0.00189
568	0.016	0.024	0.024	0.023	0.021	0.022	0.00189
569	0.016	0.024	0.023	0.023	0.021	0.022	0.00189
570	0.015	0.023	0.023	0.023	0.021	0.022	0.00189
571	0.015	0.023	0.023	0.023	0.021	0.022	0.00189
572	0.015	0.023	0.023	0.023	0.021	0.022	0.00189
573	0.015	0.023	0.023	0.022	0.02	0.022	0.000890209
574	0.015	0.023	0.022	0.022	0.02	0.022	0.000890209
575	0.015	0.022	0.022	0.022	0.02	0.021	0.000890209
576	0.014	0.022	0.022	0.022	0.02	0.021	0.000890209
577	0.014	0.022	0.022	0.022	0.02	0.021	0.000890209
578	0.014	0.022	0.022	0.022	0.02	0.021	0.000890209
579	0.014	0.022	0.022	0.021	0.019	0.021	0.000890209
580	0.014	0.022	0.022	0.021	0.019	0.021	-0.000109791
581	0.014	0.022	0.022	0.022	0.019	0.021	0.000890209
582	0.014	0.022	0.022	0.021	0.019	0.021	-0.000109791
583	0.013	0.022	0.021	0.021	0.019	0.021	-0.000109791
584	0.013	0.021	0.021	0.021	0.019	0.021	-0.000109791
585	0.013	0.021	0.021	0.021	0.019	0.02	-0.000109791
586	0.013	0.021	0.021	0.021	0.019	0.02	-0.000109791
587	0.013	0.021	0.021	0.02	0.018	0.02	-0.000109791
588	0.013	0.021	0.021	0.02	0.018	0.02	-0.000109791
589	0.012	0.021	0.02	0.02	0.018	0.02	-0.00111
590	0.012	0.02	0.02	0.02	0.018	0.02	-0.00111
591	0.012	0.02	0.02	0.02	0.018	0.019	-0.00111
592	0.012	0.02	0.02	0.02	0.018	0.019	-0.00111
593	0.012	0.02	0.02	0.019	0.017	0.019	-0.00111
594	0.011	0.019	0.02	0.019	0.017	0.019	-0.00111
595	0.011	0.019	0.019	0.019	0.017	0.019	-0.00211
596	0.011	0.019	0.019	0.019	0.017	0.019	-0.00211
597	0.011	0.019	0.019	0.019	0.017	0.018	-0.00211
598	0.011	0.019	0.019	0.019	0.017	0.018	-0.00211
599	0.011	0.019	0.019	0.018	0.017	0.018	-0.00211
600	0.01	0.019	0.018	0.018	0.016	0.018	-0.00211
601	0.01	0.018	0.018	0.018	0.016	0.018	-0.00311
602	0.01	0.018	0.018	0.018	0.016	0.018	-0.00311
603	0.01	0.018	0.018	0.018	0.016	0.018	-0.00311
604	0.01	0.018	0.018	0.018	0.016	0.017	-0.00311
605	0.01	0.018	0.018	0.017	0.016	0.017	-0.00311
606	0.009	0.018	0.018	0.017	0.015	0.017	-0.00311
607	0.009	0.017	0.017	0.017	0.015	0.017	-0.00311
608	0.009	0.017	0.017	0.017	0.015	0.017	-0.00411
609	0.009	0.017	0.017	0.017	0.015	0.017	-0.00411
610	0.009	0.017	0.017	0.017	0.015	0.017	-0.00411
611	0.009	0.017	0.017	0.016	0.015	0.016	-0.00411
612	0.009	0.017	0.017	0.016	0.015	0.017	-0.00411
613	0.009	0.017	0.017	0.016	0.015	0.016	-0.00411
614	0.009	0.017	0.016	0.016	0.015	0.016	-0.00411
615	0.008	0.016	0.016	0.016	0.014	0.016	-0.00411
616	0.008	0.016	0.016	0.016	0.014	0.016	-0.00411
617	0.008	0.016	0.016	0.016	0.014	0.016	-0.00511
618	0.008	0.016	0.016	0.015	0.014	0.016	-0.00511
619	0.008	0.016	0.016	0.015	0.014	0.016	-0.00511
620	0.008	0.016	0.015	0.015	0.014	0.015	-0.00511
621	0.007	0.015	0.015	0.015	0.013	0.016	-0.00511
622	0.007	0.015	0.015	0.015	0.013	0.015	-0.00511
623	0.007	0.015	0.015	0.015	0.013	0.015	-0.00511
624	0.007	0.015	0.015	0.015	0.013	0.015	-0.00611
625	0.007	0.015	0.015	0.015	0.013	0.015	-0.00611
626	0.007	0.015	0.014	0.015	0.013	0.015	-0.00611
627	0.006	0.015	0.014	0.014	0.013	0.014	-0.00611
628	0.006	0.014	0.014	0.014	0.012	0.014	-0.00611
629	0.006	0.014	0.014	0.014	0.012	0.014	-0.00611
630	0.006	0.014	0.014	0.014	0.012	0.014	-0.00711
631	0.006	0.014	0.014	0.014	0.012	0.014	-0.00711
632	0.006	0.014	0.014	0.013	0.012	0.014	-0.00711
633	0.006	0.014	0.013	0.013	0.012	0.014	-0.00711
634	0.006	0.014	0.013	0.013	0.012	0.013	-0.00711
635	0.005	0.013	0.013	0.013	0.011	0.013	-0.00711
636	0.005	0.013	0.013	0.013	0.011	0.013	-0.00811
637	0.005	0.013	0.013	0.013	0.011	0.013	-0.00811
638	0.005	0.013	0.013	0.012	0.011	0.013	-0.00811
639	0.005	0.013	0.012	0.012	0.011	0.013	-0.00811
640	0.004	0.012	0.012	0.012	0.011	0.013	-0.00811
641	0.004	0.012	0.012	0.012	0.01	0.012	-0.00811
642	0.004	0.012	0.012	0.012	0.01	0.012	-0.00811
643	0.004	0.012	0.012	0.012	0.01	0.012	-0.00811
644	0.004	0.012	0.012	0.011	0.01	0.012	-0.00811
645	0.004	0.012	0.012	0.011	0.01	0.012	-0.00911
646	0.004	0.012	0.011	0.011	0.01	0.012	-0.00911
647	0.003	0.011	0.011	0.011	0.01	0.012	-0.00911
648	0.004	0.011	0.011	0.011	0.01	0.012	-0.00911
649	0.003	0.011	0.011	0.011	0.009	0.011	-0.00911
650	0.003	0.011	0.011	0.01	0.009	0.011	-0.00911
651	0.003	0.011	0.011	0.01	0.009	0.011	-0.01011
652	0.003	0.011	0.011	0.011	0.009	0.011	-0.01011
653	0.003	0.011	0.01	0.01	0.009	0.011	-0.01011
654	0.002	0.01	0.01	0.01	0.009	0.011	-0.01011
655	0.002	0.01	0.01	0.01	0.008	0.011	-0.01011
656	0.002	0.01	0.01	0.01	0.008	0.01	-0.01011
657	0.002	0.01	0.01	0.009	0.008	0.01	-0.01011
658	0.002	0.01	0.01	0.009	0.008	0.01	-0.01011
659	0.002	0.009	0.009	0.009	0.008	0.01	-0.01111
660	0.002	0.01	0.009	0.009	0.008	0.01	-0.01111
661	0.001	0.009	0.009	0.009	0.008	0.01	-0.01111
662	0.001	0.009	0.009	0.009	0.008	0.01	-0.01111
663	0.001	0.009	0.009	0.008	0.007	0.009	-0.01111
664	0.001	0.009	0.009	0.008	0.007	0.009	-0.01111
665	0.001	0.009	0.008	0.008	0.007	0.009	-0.01211
666	0.001	0.009	0.008	0.008	0.007	0.009	-0.01211
667	0.001	0.009	0.008	0.008	0.007	0.009	-0.01211
668	0.001	0.009	0.008	0.008	0.007	0.009	-0.01211
669	0.001	0.008	0.008	0.007	0.007	0.009	-0.01211
670	0.001	0.008	0.008	0.007	0.007	0.009	-0.01211
671	0	0.008	0.008	0.007	0.006	0.008	-0.01211
672	0	0.008	0.007	0.007	0.006	0.008	-0.01211
673	0	0.008	0.007	0.007	0.006	0.008	-0.01211
674	0	0.008	0.007	0.007	0.006	0.008	-0.01311
675	0	0.007	0.007	0.006	0.006	0.008	-0.01311
676	0	0.007	0.007	0.006	0.006	0.008	-0.01311
677	0	0.007	0.007	0.006	0.006	0.008	-0.01311
678	-0.001	0.007	0.006	0.006	0.005	0.007	-0.01311
679	-0.001	0.007	0.006	0.006	0.005	0.007	-0.01311
680	-0.001	0.007	0.006	0.006	0.005	0.007	-0.01411
681	-0.001	0.007	0.006	0.006	0.005	0.007	-0.01411
682	-0.001	0.006	0.006	0.006	0.005	0.007	-0.01411
683	-0.001	0.006	0.006	0.005	0.005	0.007	-0.01411
684	-0.002	0.006	0.005	0.005	0.005	0.006	-0.01411
685	-0.002	0.006	0.005	0.005	0.004	0.006	-0.01411
686	-0.002	0.006	0.005	0.005	0.004	0.006	-0.01511
687	-0.002	0.006	0.005	0.005	0.004	0.006	-0.01411
688	-0.002	0.006	0.005	0.005	0.004	0.006	-0.01511
689	-0.002	0.006	0.005	0.004	0.004	0.006	-0.01511
690	-0.002	0.006	0.005	0.004	0.004	0.006	-0.01511
691	-0.002	0.005	0.005	0.004	0.004	0.006	-0.01511
692	-0.002	0.005	0.005	0.004	0.004	0.006	-0.01511
693	-0.002	0.005	0.004	0.004	0.004	0.006	-0.01511
694	-0.003	0.005	0.004	0.004	0.004	0.006	-0.01511
695	-0.003	0.005	0.004	0.004	0.003	0.005	-0.01511
696	-0.003	0.005	0.004	0.004	0.003	0.005	-0.01611
697	-0.003	0.005	0.004	0.003	0.003	0.005	-0.01611
698	-0.003	0.005	0.004	0.003	0.003	0.005	-0.01611
699	-0.003	0.004	0.004	0.003	0.003	0.005	-0.01611
700	-0.003	0.004	0.003	0.003	0.003	0.005	-0.01611
701
702
703
704
705
706
707
708
709
710
711
712
713
714
715
716
717
718
719
720
721
722
723
724
725
726
727
728
729
730
731
732
733
734
735
736
737
738
739
740
741
742
743
744
745
746
747
748
749
750
751
752
753
754
755
756
757
758
759
760
761
762
763
764
765
766
767
768
769
770
771
772
773
774
775
776
777
778
779
780
781
782
783
784
785
786
787
788
789
790
791
792
793
794
795
796
797
798
799
800

## Sheet: Figure 6 (d)
365	89	365	66	365	69	365	78	365	70	365	61
366	80	366	59	366	77	366	69	366	56	366	86
367	96	367	52	367	67	367	81	367	65	367	57
368	101	368	52	368	79	368	78	368	61	368	64
369	89	369	64	369	81	369	98	369	65	369	82
370	103	370	77	370	86	370	74	370	81	370	91
371	106	371	67	371	79	371	97	371	77	371	92
372	104	372	84	372	99	372	114	372	97	372	111
373	116	373	73	373	106	373	113	373	82	373	103
374	126	374	93	374	115	374	130	374	98	374	105
375	149	375	98	375	145	375	132	375	135	375	108
376	172	376	122	376	155	376	165	376	153	376	130
377	213	377	133	377	176	377	170	377	170	377	171
378	237	378	146	378	204	378	195	378	196	378	192
379	291	379	168	379	222	379	247	379	231	379	208
380	280	380	214	380	237	380	275	380	259	380	261
381	352	381	247	381	334	381	302	381	322	381	308
382	430	382	306	382	368	382	379	382	363	382	363
383	511	383	365	383	445	383	469	383	447	383	412
384	609	384	447	384	539	384	539	384	495	384	534
385	704	385	534	385	603	385	626	385	593	385	612
386	832	386	641	386	750	386	785	386	710	386	751
387	953	387	752	387	871	387	918	387	841	387	894
388	1169	388	955	388	1061	388	1061	388	1039	388	1073
389	1390	389	1107	389	1158	389	1331	389	1170	389	1204
390	1605	390	1354	390	1456	390	1531	390	1408	390	1393
391	1853	391	1618	391	1739	391	1705	391	1640	391	1690
392	2247	392	2005	392	1957	392	2043	392	1887	392	1984
393	2608	393	2238	393	2388	393	2457	393	2290	393	2410
394	3124	394	2794	394	2809	394	2801	394	2708	394	2748
395	3587	395	3248	395	3279	395	3319	395	3196	395	3151
396	4117	396	3791	396	3794	396	3792	396	3740	396	3766
397	4828	397	4337	397	4442	397	4516	397	4192	397	4313
398	5516	398	5035	398	5031	398	5022	398	4932	398	4854
399	6464	399	5748	399	5914	399	5763	399	5493	399	5571
400	7102	400	6627	400	6512	400	6594	400	6027	400	6296
401	8026	401	7486	401	7250	401	7235	401	7158	401	7113
402	9001	402	8204	402	8359	402	8150	402	7643	402	7844
403	9899	403	9108	403	9206	403	9108	403	8441	403	8652
404	10975	404	10229	404	10185	404	9812	404	9352	404	9380
405	12266	405	11383	405	11046	405	10936	405	10245	405	10370
406	13142	406	12267	406	12168	406	11890	406	11044	406	11425
407	14387	407	13441	407	13167	407	12913	407	12037	407	12287
408	15856	408	14767	408	14106	408	13872	408	13220	408	13381
409	16678	409	15733	409	15339	409	15011	409	14089	409	14345
410	18050	410	16652	410	16430	410	16112	410	15030	410	15469
411	19217	411	17750	411	17495	411	16955	411	16287	411	16353
412	20278	412	19003	412	18307	412	18273	412	17024	412	17239
413	21196	413	20366	413	19499	413	19041	413	17798	413	18328
414	22578	414	21248	414	20502	414	20440	414	18735	414	19337
415	23944	415	22129	415	21640	415	21042	415	19832	415	20305
416	24754	416	23543	416	22727	416	21973	416	20832	416	21278
417	26205	417	24403	417	23732	417	23334	417	21529	417	22077
418	27138	418	25365	418	24813	418	23964	418	22647	418	22995
419	28243	419	27131	419	25509	419	25062	419	23227	419	23781
420	29340	420	27705	420	26090	420	26025	420	24089	420	25091
421	29993	421	28821	421	27909	421	27265	421	25304	421	25307
422	31235	422	29708	422	28447	422	27690	422	25736	422	26733
423	32250	423	30827	423	29577	423	28552	423	26836	423	27308
424	33216	424	31672	424	30192	424	29267	424	27455	424	28038
425	33885	425	32957	425	31026	425	30138	425	28338	425	28814
426	34931	426	33272	426	31752	426	30867	426	28864	426	29385
427	35860	427	34716	427	32960	427	31778	427	29379	427	30407
428	36920	428	35007	428	33574	428	32382	428	30040	428	30985
429	37410	429	36142	429	33984	429	33293	429	30780	429	31658
430	37971	430	36731	430	34497	430	33679	430	31587	430	32085
431	38789	431	37351	431	35465	431	34382	431	32151	431	32837
432	39150	432	38272	432	35960	432	34950	432	32744	432	33366
433	40638	433	38941	433	36496	433	35531	433	33369	433	34020
434	40581	434	39601	434	36814	434	35671	434	33714	434	34456
435	41329	435	39878	435	37500	435	36204	435	34075	435	34904
436	41630	436	40290	436	37798	436	36742	436	34259	436	34979
437	42391	437	41175	437	38073	437	37129	437	34753	437	35835
438	42675	438	41446	438	39161	438	37549	438	35122	438	36019
439	43134	439	42188	439	38896	439	37902	439	35603	439	36471
440	43425	440	42515	440	39478	440	38326	440	35967	440	36312
441	43790	441	42642	441	39910	441	38580	441	36260	441	36917
442	43944	442	43397	442	39946	442	38889	442	36034	442	36744
443	43926	443	44019	443	40134	443	39079	443	36530	443	37508
444	44506	444	43817	444	40400	444	39263	444	36549	444	37779
445	44646	445	43814	445	40763	445	39278	445	37074	445	37815
446	44646	446	44489	446	41098	446	39335	446	37284	446	37611
447	44883	447	44280	447	40793	447	39001	447	36954	447	37585
448	44613	448	44655	448	40397	448	39533	448	37151	448	38096
449	44266	449	44736	449	40708	449	39726	449	37027	449	37746
450	44417	450	44706	450	40815	450	39294	450	36850	450	37777
451	43935	451	44429	451	40512	451	39570	451	36941	451	37625
452	43702	452	44352	452	39942	452	39019	452	36867	452	37765
453	44131	453	43712	453	39988	453	38561	453	36777	453	37354
454	44160	454	44005	454	39567	454	38583	454	36371	454	37119
455	43069	455	43397	455	39309	455	38310	455	35988	455	36912
456	43207	456	43603	456	39136	456	38270	456	35780	456	36564
457	42967	457	43093	457	39060	457	37683	457	35744	457	36607
458	42264	458	42719	458	38705	458	37598	458	35177	458	35798
459	41687	459	42590	459	38500	459	36639	459	34755	459	35287
460	41521	460	41868	460	38047	460	36419	460	34135	460	35332
461	40887	461	42112	461	37311	461	36181	461	34260	461	34995
462	40334	462	41396	462	37076	462	36367	462	33738	462	34531
463	39846	463	40848	463	36779	463	35602	463	33638	463	34034
464	39621	464	40158	464	36133	464	35288	464	32524	464	33939
465	39229	465	39724	465	35425	465	34756	465	32741	465	33303
466	38328	466	39403	466	35341	466	34224	466	31996	466	32809
467	37755	467	38492	467	34324	467	33626	467	31598	467	32233
468	36998	468	38275	468	33889	468	32721	468	31092	468	31535
469	36017	469	37266	469	33249	469	32135	469	30436	469	30721
470	35440	470	37173	470	32722	470	31688	470	29764	470	30410
471	35109	471	36244	471	32106	471	31377	471	29201	471	29835
472	34738	472	35704	472	31461	472	30443	472	28639	472	29622
473	34023	473	34417	473	31061	473	30101	473	28248	473	29113
474	33254	474	34339	474	30474	474	29363	474	27929	474	28171
475	32624	475	33458	475	30051	475	29116	475	27616	475	28198
476	32056	476	33339	476	29688	476	28262	476	26742	476	27411
477	31360	477	32748	477	28923	477	27640	477	26313	477	26668
478	30869	478	31946	478	28004	478	27587	478	25895	478	26418
479	29977	479	31272	479	27710	479	26742	479	24969	479	25506
480	30011	480	30519	480	27134	480	25997	480	24857	480	25313
481	29080	481	30024	481	26705	481	25889	481	24396	481	24431
482	28438	482	29712	482	26084	482	25206	482	23796	482	24440
483	27740	483	28876	483	25547	483	24615	483	23231	483	23667
484	26930	484	28122	484	24977	484	24155	484	22887	484	23213
485	26768	485	27703	485	24617	485	23877	485	22230	485	23050
486	26103	486	26967	486	23705	486	23524	486	21852	486	22106
487	25354	487	26229	487	23383	487	22600	487	21256	487	21767
488	24877	488	25768	488	22443	488	22269	488	20679	488	21154
489	24481	489	25326	489	22132	489	21582	489	20284	489	20744
490	23939	490	24656	490	21803	490	21052	490	19881	490	20145
491	23339	491	24041	491	21168	491	20491	491	19105	491	19571
492	22434	492	23475	492	20494	492	20021	492	19006	492	18975
493	22027	493	22844	493	20078	493	19523	493	18342	493	18695
494	21419	494	22612	494	19489	494	18843	494	17929	494	18156
495	20730	495	21705	495	19119	495	18392	495	17638	495	17936
496	20516	496	21280	496	18346	496	18301	496	16930	496	17233
497	19870	497	20754	497	17750	497	17666	497	16633	497	16779
498	19271	498	20345	498	17609	498	17261	498	16303	498	16095
499	18728	499	19593	499	17222	499	16478	499	15694	499	15988
500	18120	500	19112	500	16662	500	16258	500	15457	500	15387
501	17698	501	18786	501	16219	501	15887	501	14801	501	15102
502	16990	502	17984	502	15676	502	15181	502	14294	502	14605
503	17008	503	17518	503	15205	503	14813	503	14060	503	14239
504	16255	504	16854	504	14873	504	14534	504	13553	504	13745
505	15809	505	16787	505	14315	505	13930	505	13128	505	13332
506	15120	506	15986	506	13932	506	13476	506	12641	506	12991
507	14820	507	15826	507	13724	507	13350	507	12368	507	12668
508	14565	508	15322	508	13242	508	12909	508	11986	508	12108
509	14037	509	14597	509	12914	509	12543	509	11742	509	11954
510	13614	510	14593	510	12528	510	11955	510	11378	510	11401
511	13168	511	13921	511	12244	511	11501	511	11131	511	11158
512	12736	512	13483	512	11864	512	11340	512	10764	512	10987
513	12450	513	13068	513	11450	513	10804	513	10494	513	10520
514	11888	514	12659	514	10912	514	10780	514	10116	514	10179
515	11449	515	12374	515	10733	515	10315	515	9692	515	10021
516	11277	516	11908	516	10329	516	10024	516	9358	516	9671
517	10971	517	11577	517	10169	517	9708	517	9391	517	9325
518	10613	518	11140	518	9524	518	9598	518	8891	518	9158
519	10200	519	10763	519	9458	519	9047	519	8773	519	8975
520	9869	520	10637	520	9127	520	8801	520	8202	520	8544
521	9482	521	10214	521	8837	521	8611	521	8235	521	8399
522	9291	522	9903	522	8619	522	8344	522	7742	522	7986
523	9030	523	9560	523	8394	523	8141	523	7685	523	7685
524	8732	524	9281	524	7970	524	7835	524	7306	524	7350
525	8310	525	8990	525	7745	525	7633	525	7195	525	7161
526	8119	526	8521	526	7577	526	7277	526	6882	526	7055
527	7971	527	8404	527	7414	527	7209	527	6636	527	6845
528	7555	528	8028	528	7018	528	6738	528	6495	528	6507
529	7343	529	7936	529	6900	529	6608	529	6264	529	6358
530	7122	530	7639	530	6607	530	6498	530	6006	530	6139
531	7021	531	7330	531	6297	531	6216	531	5799	531	6033
532	6618	532	7154	532	6165	532	5938	532	5610	532	5757
533	6522	533	6970	533	5978	533	5745	533	5372	533	5694
534	6191	534	6645	534	5767	534	5631	534	5318	534	5284
535	5968	535	6387	535	5488	535	5464	535	5117	535	5292
536	5829	536	6134	536	5467	536	5230	536	4914	536	5104
537	5625	537	5909	537	5131	537	5046	537	4901	537	4775
538	5417	538	5798	538	4979	538	4784	538	4548	538	4737
539	5234	539	5599	539	4967	539	4789	539	4481	539	4617
540	5137	540	5569	540	4789	540	4689	540	4330	540	4358
541	4936	541	5187	541	4581	541	4431	541	4274	541	4321
542	4747	542	5076	542	4398	542	4334	542	3909	542	4162
543	4562	543	4893	543	4264	543	4079	543	3839	543	4032
544	4294	544	4700	544	4103	544	3989	544	3734	544	3877
545	4306	545	4679	545	4048	545	3840	545	3668	545	3645
546	4030	546	4322	546	3844	546	3720	546	3460	546	3653
547	3880	547	4254	547	3687	547	3616	547	3531	547	3432
548	3756	548	4162	548	3581	548	3445	548	3257	548	3414
549	3656	549	3889	549	3402	549	3290	549	3161	549	3201
550	3586	550	3791	550	3298	550	3183	550	3070	550	3121
551	3572	551	3676	551	3242	551	3110	551	2906	551	3080
552	3272	552	3520	552	3189	552	3108	552	2976	552	2942
553	3195	553	3458	553	3026	553	2896	553	2779	553	2749
554	3168	554	3215	554	2959	554	2845	554	2682	554	2742
555	2961	555	3261	555	2717	555	2843	555	2668	555	2575
556	2910	556	3203	556	2622	556	2667	556	2531	556	2528
557	2768	557	3000	557	2605	557	2549	557	2368	557	2459
558	2732	558	2885	558	2520	558	2402	558	2402	558	2220
559	2647	559	2833	559	2414	559	2452	559	2214	559	2313
560	2530	560	2718	560	2403	560	2330	560	2168	560	2147
561	2463	561	2694	561	2288	561	2291	561	2139	561	2246
562	2454	562	2496	562	2237	562	2176	562	1971	562	2137
563	2322	563	2531	563	2101	563	2076	563	1980	563	2011
564	2166	564	2399	564	2173	564	1995	564	1943	564	1835
565	2069	565	2335	565	2068	565	1983	565	1906	565	1864
566	2111	566	2209	566	1910	566	1851	566	1818	566	1832
567	2008	567	2144	567	1852	567	1725	567	1665	567	1773
568	1991	568	2126	568	1797	568	1844	568	1658	568	1783
569	1904	569	2045	569	1774	569	1726	569	1691	569	1685
570	1729	570	1978	570	1668	570	1647	570	1588	570	1550
571	1806	571	1866	571	1676	571	1629	571	1602	571	1587
572	1656	572	1863	572	1622	572	1556	572	1496	572	1499
573	1609	573	1796	573	1604	573	1449	573	1414	573	1437
574	1505	574	1759	574	1601	574	1553	574	1416	574	1447
575	1516	575	1637	575	1443	575	1418	575	1356	575	1298
576	1422	576	1589	576	1410	576	1415	576	1297	576	1342
577	1491	577	1492	577	1350	577	1293	577	1241	577	1214
578	1425	578	1492	578	1355	578	1265	578	1217	578	1267
579	1407	579	1466	579	1290	579	1214	579	1190	579	1200
580	1245	580	1488	580	1288	580	1226	580	1119	580	1085
581	1319	581	1402	581	1247	581	1150	581	1093	581	1130
582	1254	582	1290	582	1143	582	1085	582	1042	582	1056
583	1189	583	1249	583	1117	583	1078	583	1054	583	1122
584	1205	584	1253	584	1084	584	1057	584	1015	584	1052
585	1151	585	1246	585	1037	585	1033	585	1011	585	1021
586	1109	586	1154	586	1029	586	959	586	932	586	995
587	1018	587	1105	587	995	587	930	587	915	587	901
588	984	588	1092	588	956	588	968	588	878	588	895
589	942	589	1085	589	930	589	890	589	806	589	939
590	985	590	1058	590	872	590	926	590	802	590	860
591	977	591	1023	591	899	591	799	591	751	591	835
592	904	592	983	592	842	592	823	592	844	592	832
593	866	593	960	593	794	593	792	593	755	593	757
594	879	594	941	594	786	594	785	594	670	594	744
595	790	595	903	595	795	595	711	595	716	595	699
596	827	596	826	596	781	596	707	596	722	596	743
597	787	597	828	597	694	597	654	597	606	597	673
598	782	598	791	598	692	598	779	598	620	598	694
599	745	599	772	599	727	599	670	599	613	599	677
600	738	600	776	600	651	600	644	600	628	600	656
601	665	601	770	601	632	601	656	601	575	601	600
602	637	602	723	602	592	602	606	602	581	602	599
603	656	603	648	603	589	603	595	603	560	603	540
604	619	604	701	604	590	604	600	604	580	604	574
605	589	605	665	605	593	605	559	605	545	605	523
606	581	606	608	606	583	606	517	606	521	606	552
607	584	607	626	607	545	607	517	607	520	607	518
608	537	608	554	608	518	608	488	608	497	608	513
609	539	609	601	609	537	609	486	609	474	609	494
610	552	610	544	610	462	610	465	610	440	610	484
611	500	611	542	611	482	611	466	611	452	611	440
612	494	612	513	612	429	612	465	612	422	612	443
613	513	613	518	613	439	613	461	613	382	613	424
614	432	614	473	614	397	614	400	614	428	614	425
615	436	615	502	615	415	615	398	615	416	615	388
616	395	616	479	616	415	616	400	616	426	616	369
617	405	617	417	617	432	617	405	617	388	617	354
618	376	618	412	618	401	618	405	618	383	618	389
619	393	619	409	619	378	619	374	619	350	619	354
620	385	620	392	620	368	620	341	620	352	620	341
621	399	621	373	621	337	621	392	621	364	621	339
622	347	622	396	622	353	622	349	622	340	622	320
623	349	623	367	623	303	623	333	623	288	623	312
624	325	624	387	624	309	624	354	624	291	624	318
625	335	625	387	625	292	625	312	625	285	625	285
626	289	626	331	626	265	626	285	626	317	626	308
627	314	627	332	627	262	627	332	627	261	627	265
628	295	628	314	628	295	628	282	628	267	628	286
629	309	629	340	629	266	629	262	629	268	629	269
630	279	630	322	630	240	630	240	630	274	630	271
631	243	631	283	631	241	631	268	631	269	631	254
632	263	632	277	632	272	632	258	632	251	632	236
633	241	633	239	633	242	633	268	633	219	633	249
634	209	634	287	634	233	634	247	634	223	634	228
635	215	635	254	635	265	635	209	635	204	635	201
636	261	636	252	636	223	636	220	636	197	636	232
637	240	637	240	637	228	637	241	637	204	637	205
638	197	638	223	638	228	638	244	638	222	638	207
639	247	639	215	639	211	639	203	639	179	639	185
640	196	640	230	640	211	640	182	640	205	640	185
641	215	641	220	641	225	641	173	641	172	641	196
642	197	642	207	642	191	642	221	642	195	642	185
643	196	643	212	643	185	643	209	643	197	643	182
644	214	644	217	644	181	644	170	644	181	644	174
645	193	645	211	645	202	645	181	645	148	645	161
646	206	646	181	646	163	646	140	646	153	646	184
647	183	647	191	647	166	647	161	647	186	647	166
648	188	648	211	648	192	648	164	648	165	648	195
649	174	649	203	649	167	649	160	649	165	649	172
650	178	650	181	650	173	650	167	650	175	650	165
651	176	651	176	651	170	651	164	651	138	651	164
652	150	652	164	652	149	652	135	652	136	652	143
653	158	653	165	653	151	653	144	653	158	653	125
654	158	654	164	654	174	654	133	654	151	654	152
655	144	655	154	655	141	655	148	655	155	655	144
656	153	656	168	656	168	656	157	656	147	656	124
657	150	657	164	657	145	657	137	657	116	657	129
658	132	658	136	658	132	658	148	658	135	658	153
659	129	659	131	659	140	659	145	659	132	659	145
660	149	660	134	660	147	660	147	660	113	660	126
661	141	661	123	661	132	661	143	661	109	661	117
662	133	662	140	662	129	662	147	662	133	662	119
663	140	663	132	663	136	663	121	663	109	663	122
664	111	664	116	664	123	664	120	664	114	664	117
665	118	665	117	665	102	665	108	665	102	665	107
666	123	666	129	666	120	666	119	666	112	666	114
667	103	667	111	667	105	667	108	667	105	667	106
668	126	668	125	668	111	668	102	668	100	668	95
669	96	669	108	669	118	669	106	669	122	669	87
670	105	670	124	670	109	670	111	670	90	670	107
671	114	671	125	671	93	671	116	671	95	671	102
672	108	672	112	672	94	672	108	672	99	672	87
673	97	673	99	673	102	673	113	673	88	673	100
674	100	674	127	674	88	674	105	674	98	674	89
675	88	675	88	675	83	675	84	675	72	675	96
676	100	676	105	676	101	676	105	676	96	676	100
677	91	677	91	677	105	677	78	677	96	677	94
678	93	678	93	678	79	678	84	678	93	678	104
679	94	679	92	679	74	679	88	679	82	679	72
680	75	680	88	680	104	680	91	680	94	680	84

## Sheet: Figure 6 (e)
0	1	1	1	1
10	1.15517	1.03426	1.17012	1.09032
20	1.38147	1.08565	1.32988	1.15914
30	1.55603	1.15418	1.70539	1.2129
40	1.77586	1.20771	1.86929	1.31398
50	2.03664	1.21842	1.95643	1.35914
60	2.14871	1.27409	2.10373	1.37849

## Sheet: Figure 6 (f)
0	1	1	1	1
10	1.17336	1.00388	1.09961	1.06041
20	1.27546	1.10232	1.1862	1.06784
30	1.3706	1.13485	1.45334	1.07861
40	1.52833	1.18236	1.55812	1.09414
50	1.68687	1.20868	1.80717	1.12411
