# Supplementary material for: In-depth chiral sensing capability of C-dots in a biomimetic protein-based hydrogel: a probe for chiral recognition applications
Source: Royal Society of Chemistry journal article supplement (doi:10.1039/d5bm01508a), 2026-01-01
Supplement: d5bm01508a1.zip [file Figure S3.xlsx]

## Sheet: Figure S(a)
8.186
7.372
8.197
8.929
9.758
6.546
5.956
12.664
9.503
9.441
7.585
6.321
10.214
7.528
8.242
8.901
10.977
9.116
7.949
9.011
8.155
8.312
10.934
9.025
8.178
9.116
10.165
8.86
10.946
6.564
7.258
6.451
7.84
8.96
9.011
8.981
8.734
8.987
8.419
8.734
8.316
7.654
6.947
6.032
7.194
8.481
5.708
7.722
6.767
7.156
6.446
7.949

## Sheet: Figure S(b)
12.119
6.401
8.378
12.546
10.903
7.643
9.469
8.057
12.546
10.903
7.981
11.693
10.903
9.12
7.749
9.053
9.949
11.465
6.89
10.191
7.121
9.12
10.071
8.94
8.305
9.274
7.455
8.545
10.29
9.554
7.67
10.903
6.369
9.053
10.847
11.536
9.554
12.755
11.71
8.28
9.575
11.483
8.305
10.27
9.949
9.008
8.569
10.847
8.305
9.469

## Sheet: Figure S(c)
4.48
8.048
8.717
4.801
7.122
11.247
12.761
8.484
8.824
9.267
8.471
8.155
8.031
7.108
6.592
8.697
7.533
6.707
6.102
7.647
6.84
10.017
7.737
10.789
6.905
8.306
11.421
11.238
8.014
7.156
8.933
9.086
8.78
8.235
8.484
10.552
7.533
7.533
10.26
9.536
9.342
9.06
7.18
7.18
7.953
8.193
8.172
7.441
9.412
6.192
8.492

## Sheet: Figure S(d)
Distance_(nm)	Gray_Value
0	82
0.0202	76.3344
0.0404	71.6749
0.06061	69.2643
0.08081	71.3584
0.10101	76.3279
0.12121	81.9329
0.14141	86.7383
0.16161	86.8376
0.18182	83.4849
0.20202	77.3279
0.22222	70.9607
0.24242	67.2487
0.26262	66.8616
0.28282	70.4993
0.30303	77.2295
0.32323	82.8882
0.34343	85.8884
0.36363	84.9102
0.38383	79.4426
0.40404	72.3703
0.42424	66.0374
0.44444	63.3106
0.46464	64.8521
0.48484	70.9672
0.50504	78.0492
0.52525	83.8801
0.54545	85.6792
0.56565	82.347
0.58585	74.5475
0.60605	66.5628
0.62625	60.7217
0.64646	59.8592
0.66666	64.1448
0.68686	71.9443
0.70706	79.8506
0.72726	84.4024
0.74747	83.7149
0.76767	77.7788
0.78787	69.2
0.80807	60.7987
0.82827	56.4854
0.84847	57.9633
0.86868	64.775
0.88888	73.8574
0.90908	81.4063
0.92928	84.3068
0.94948	80.6994
0.96968	72.1908
0.98989	62.5891
1.01009	55.1435
1.03029	53.473
1.05049	57.4246
1.07069	66.482
1.0909	75.8665
1.1111	82.0551
1.1313	83.0229
1.1515	76.5883
1.1717	66.2492
1.1919	56.4029
1.21211	50.3104
1.23231	51.44
1.25251	58.2141
1.27271	68.8443
1.29291	78.173
1.31311	82.083
1.33332	79.8579
1.35352	70.8131
1.37372	59.482
1.39392	50.3253
1.41412	46.3064
1.43433	50.9587
1.45453	60.6198
1.47473	72.0182
1.49493	80.2184
1.51513	81.5697
1.53533	75.8117
1.55554	64.4412
1.57574	52.7848
1.59594	45.3245
1.61614	44.3168
1.63634	52.1477
1.65654	63.48
1.67675	74.6947
1.69695	81.7606
1.71715	79.4321
1.73735	70.3614
1.75755	57.9448
1.77776	46.478
1.79796	41.4043
1.81816	44.5222
1.83836	54.2068
1.85856	67.6648
1.87876	77.8708
1.89897	81.5687
1.91917	75.8646
1.93937	64.0158
1.95957	50.5472
1.97977	40.3352
1.99997	39.1836
2.02018	45.7092
2.04038	58.5574
2.06058	71.6947
2.08078	79.6096
2.10098	79.7018
2.12119	70.4913
2.14139	56.623
2.16159	43.6755
2.18179	36.0494
2.20199	38.1259
2.22219	48.4542
2.2424	63.1185
2.2626	75.33
2.2828	80.0632
2.303	76.166
2.3232	64.0734
2.3434	49.0376
2.36361	37.2612
2.38381	33.8134
2.40401	39.4617
2.42421	52.8237
2.44441	67.7837
2.46462	78.2
2.48482	79.8368
2.50502	71.9282
2.52522	56.7541
2.54542	41.8818
2.56562	32.2105
2.58583	32.9781
2.60603	42.7447
2.62623	58.3781
2.64643	72.2864
2.66663	79.5343
2.68683	77.3208
2.70704	65.0022
2.72724	48.9344
2.74744	35.4008
2.76764	29.4362
2.78784	34.5523
2.80804	47.4999
2.82825	63.1857
2.84845	75.9198
2.86865	78.8711
2.88885	72.4354
2.90905	58.3634
2.92926	41.681
2.94946	30.8616
2.96966	28.088
2.98986	37.7723
3.01006	53.0131
3.03026	68.3805
3.05047	79.2373
3.07067	77.2649
3.09087	66.6673
3.11107	50.5163
3.13127	35.2884
3.15147	27.5848
3.17168	29.7186
3.19188	41.9308
3.21208	58.961
3.23228	73.039
3.25248	79.7546
3.27269	73.7934
3.29289	59.8539
3.31309	42.8716
3.33329	29.4058
3.35349	26.2899
3.37369	33.0291
3.3939	48.4394
3.4141	64.988
3.4343	76.0132
3.4545	78.1148
3.4747	68.6844
3.4949	52.5672
3.51511	36.5467
3.53531	26.1739
3.55551	27.3353
3.57571	38.2109
3.59591	54.4164
3.61612	70.3313
3.63632	77.8358
3.65652	75.4171
3.67672	62.3465
3.69692	45.52
3.71712	30.7664
3.73733	24.8234
3.75753	29.759
3.77773	43.864
3.79793	60.9867
3.81813	74.263
3.83833	77.9785
3.85854	71.1993
3.87874	55.6295
3.89894	39.0055
3.91914	27.0067
3.93934	25.6576
3.95955	34.6616
3.97975	50.577
3.99995	67.3507
4.02015	76.5723
4.04035	76.1295
4.06055	65.6558
4.08076	48.8289
4.10096	33.4138
4.12116	25.0407
4.14136	28.3897
4.16156	40.6762
4.18177	57.3323
4.20197	71.8005
4.22217	77.6258
4.24237	73.3574
4.26257	59.4762
4.28277	42.3421
4.30298	29.7023
4.32318	25.5056
4.34338	33.0116
4.36358	47.5652
4.38378	63.8012
4.40398	75.6035
4.42419	76.6211
4.44439	68.2749
4.46459	52.7246
4.48479	37.4352
4.50499	27.9555
4.52519	27.703
4.5454	38.9798
4.5656	54.7246
4.5858	69.4206
4.606	78.6847
4.6262	74.6785
4.64641	62.9984
4.66661	46.9698
4.68681	33.2904
4.70701	28.2368
4.72721	32.3751
4.74741	45.4211
4.76762	61.4258
4.78782	73.7952
4.80802	78.6514
4.82822	71.588
4.84842	58.0494
4.86862	42.5891
4.88883	31.4207
4.90903	30.5239
4.92923	38.56
4.94943	53.169
4.96963	67.7598
4.98984	76.4161
5.01004	76.9292
5.03024	67.824
5.05044	52.918
5.07064	39.0618
5.09084	31.7553
5.11105	34.4909
5.13125	45.1124
5.15145	59.7428
5.17165	72.7705
5.19185	78.1502
5.21205	74.9748
5.23226	63.2111
5.25246	48.8275
5.27266	37.6013
5.29286	33.9113
5.31306	39.6172
5.33327	52.4405
5.35347	66.9941
5.37367	76.5655
5.39387	78.5991
5.41407	71.7805
5.43427	58.9016
5.45448	45.6084
5.47468	37.8882
5.49488	37.8377
5.51508	46.5433
5.53528	59.7081
5.55548	72.0438
5.57569	78.8106
5.59589	77.2612
5.61609	68.5644
5.63629	55.5777
5.65649	44.2408
5.6767	39.5305
5.6969	43.219
5.7171	53.434
5.7373	66.3016
5.7575	77.0038
5.7777	80.0543
5.79791	75.8211
5.81811	64.7082
5.83831	52.9609
5.85851	44.7595
5.87871	42.5331
5.89891	49.2498
5.91912	60.2717
5.93932	71.86
5.95952	80.1755
5.97972	79.834
5.99992	73.2089
6.02013	62.318
6.04033	52.1112
6.06053	46.376
6.08073	47.4195
6.10093	55.3011
6.12113	66.594
6.14134	76.2463
6.16154	82

## Sheet: Figure S(e)
Distance_(nm)	Gray_Value
0	94
0.0202	97.1851
0.0404	97.9695
0.0606	96.847
0.08081	93.751
0.10101	89.6305
0.12121	86.0964
0.14141	84.1292
0.16161	84.3838
0.18181	86.2806
0.20202	89.7231
0.22222	93.6064
0.24242	95.8434
0.26262	96.53
0.28282	94.6827
0.30302	90.8249
0.32322	86.6414
0.34343	82.9719
0.36363	81.7368
0.38383	82.5974
0.40403	85.4143
0.42423	89.2198
0.44443	93.2072
0.46464	94.9523
0.48484	94.1841
0.50504	91.8062
0.52524	87.6787
0.54544	83.8193
0.56564	81.0895
0.58585	80.0023
0.60605	81.4578
0.62625	84.8213
0.64645	88.992
0.66665	92.415
0.68685	93.932
0.70705	92.1807
0.72726	88.759
0.74746	84.4659
0.76766	80.6345
0.78786	78.3867
0.80806	78.7203
0.82826	81.0772
0.84847	84.9036
0.86867	89.0186
0.88887	91.2907
0.90907	91.9704
0.92927	90.0741
0.94947	86.2
0.96968	81.3976
0.98988	78.3009
1.01008	77.1325
1.03028	78.0356
1.05048	80.9338
1.07068	85.1165
1.09088	88.7952
1.11109	90.786
1.13129	90.7223
1.15149	87.9366
1.17169	83.5141
1.19189	78.9538
1.21209	75.8376
1.2323	75.1422
1.2525	77.2129
1.2727	80.8554
1.2929	85.1656
1.3131	88.4305
1.3333	89.8984
1.3535	88.3522
1.37371	84.7681
1.39391	80.7149
1.41411	76.6507
1.43431	74.3444
1.45451	74.5001
1.47471	77.0442
1.49492	81.0683
1.51512	85.5242
1.53532	88.2851
1.55552	88.8325
1.57572	87.0361
1.59592	82.5687
1.61612	77.996
1.63633	74.3786
1.65653	73.0394
1.67673	74.1111
1.69693	77.8072
1.71713	82.2024
1.73733	85.7791
1.75754	87.9955
1.77774	87.2832
1.79794	84.8485
1.81814	80.1315
1.83834	75.8497
1.85854	72.3711
1.87875	72
1.89895	74.0034
1.91915	78.0201
1.93935	82.494
1.95955	85.9839
1.97975	87.5121
1.99995	86.3014
2.02016	82.6104
2.04036	78.1365
2.06056	73.6603
2.08076	71.5335
2.10096	71.8275
2.12116	74.916
2.14137	79.2329
2.16157	83.5642
2.18177	86.2815
2.20197	86.5095
2.22217	84.2926
2.24237	80.4819
2.26257	75.6631
2.28278	72.2368
2.30298	70.9043
2.32318	72.2264
2.34338	75.2369
2.36358	80.2426
2.38378	84.3454
2.40399	86.3767
2.42419	85.71
2.44439	82.9517
2.46459	78.7189
2.48479	73.9479
2.50499	70.6756
2.5252	70.013
2.5454	72.7229
2.5656	76.2876
2.5858	81.3494
2.606	84.5663
2.6262	86.0063
2.6464	84.6907
2.66661	80.8434
2.68681	76.2169
2.70701	72.367
2.72721	70.1453
2.74741	70.2488
2.76761	73.3574
2.78782	78.2048
2.80802	82.5135
2.82822	85.1727
2.84842	85.6473
2.86862	83.2791
2.88882	79.1361
2.90902	74.8792
2.92923	70.8639
2.94943	70.0395
2.96963	70.8531
2.98983	74.9325
3.01003	79.506
3.03023	83.2892
3.05044	85.4749
3.07064	85.0014
3.09084	81.8365
3.11104	77.5939
3.13124	73.7705
3.15144	70.736
3.17165	70.2498
3.19185	72.4923
3.21205	76.3604
3.23225	80.8233
3.25245	84.0583
3.27265	85.6702
3.29285	83.9518
3.31306	80.7912
3.33326	76.5542
3.35346	72.2222
3.37366	70.0197
3.39386	70.8072
3.41406	73.1744
3.43427	77.5622
3.45447	82.0361
3.47467	84.6357
3.49487	85.3129
3.51507	83.1597
3.53527	79.3968
3.55547	75.1525
3.57568	71.9218
3.59588	70.5417
3.61608	71.6066
3.63628	75.3012
3.65648	79.7681
3.67668	83.0442
3.69689	84.7805
3.71709	84.8329
3.73729	81.9839
3.75749	78.4217
3.77769	74.6749
3.79789	71.9856
3.8181	71.3556
3.8383	73.2329
3.8585	76.5141
3.8787	80.9727
3.8989	84.6701
3.9191	85.6454
3.9393	84.0553
3.95951	80.7992
3.97971	77.2369
3.99991	74.132
4.02011	72.3976
4.04031	72.57
4.06051	74.9023
4.08072	78.6417
4.10092	82.1647
4.12112	84.9463
4.14132	85.1782
4.16152	83.8178
4.18172	80.6145
4.20192	77.037
4.22213	74.2665
4.24233	73.0734
4.26253	74.0965
4.28273	77.1968
4.30293	80.6506
4.32313	83.751
4.34334	86
4.36354	85.6801
4.38374	82.951
4.40394	80.0381
4.42414	76.6612
4.44434	74.436
4.46455	74.4739
4.48475	76.0916
4.50495	79.1365
4.52515	82.2851
4.54535	85.1841
4.56555	85.9844
4.58575	85.151
4.60596	82.7079
4.62616	79.245
4.64636	76.502
4.66656	75.4458
4.68676	76.0039
4.70696	78.2088
4.72717	80.7711
4.74737	83.8702
4.76757	86.1486
4.78777	86.9014
4.80797	85.1412
4.82817	82.506
4.84837	79.8554
4.86858	77.6931
4.88878	76.9602
4.90898	77.8048
4.92918	80.257
4.94938	83.2836
4.96958	85.5301
4.98979	87
5.00999	86.8964
5.03019	85

## Sheet: Figure S(f)
Distance_(nm)	Gray_Value
0	17
0.02	16.1591
0.04	14.5795
0.06	12.1335
0.08	10.1667
0.1	9
0.11999	9.0909
0.13999	10.7727
0.15999	13.1818
0.17999	15.1364
0.19999	16.6553
0.21999	16.75
0.23999	15.7273
0.25999	13.1629
0.27999	10.0985
0.29998	8.3864
0.31998	8
0.33998	8.6525
0.35998	11.1932
0.37998	14.2169
0.39998	16.6061
0.41998	17.4119
0.43998	16.5417
0.45998	14.3343
0.47998	11.2727
0.49997	7.965
0.51997	6.2727
0.53997	6.7045
0.55997	8.803
0.57997	12.2538
0.59997	15.4545
0.61997	17.0682
0.63997	17.6364
0.65997	15.625
0.67997	12.2197
0.69997	8.7282
0.71996	6.0909
0.73996	5.1184
0.75996	6.5114
0.77996	9.4858
0.79996	13.4242
0.81996	16.5407
0.83996	18
0.85996	17.2311
0.87996	14.1667
0.89995	10.2614
0.91995	6.3561
0.93995	4.4773
0.95995	4.7273
0.97995	7.3598
0.99995	11.2652
1.01995	15.1705
1.03995	17.4545
1.05995	17.5975
1.07995	15.6705
1.09994	11.9583
1.11994	7.3333
1.13994	4.2131
1.15994	3.1326
1.17994	4.8153
1.19994	8.2727
1.21994	12.5189
1.23994	16.9129
1.25994	18.9545
1.27994	17.3636
1.29993	14.1553
1.31993	9.25
1.33993	4.8778
1.35993	2.1364
1.37993	2.0767
1.39993	5.3826
1.41993	9.9811
1.43993	14.7273
1.45993	17.7727
1.47993	18.5265
1.49993	16.0341
1.51992	11.303
1.53992	6.3229
1.55992	2.5341
1.57992	1
1.59992	2.4242
1.61992	6.5568
1.63992	12.1439
1.65992	16.9356
1.67992	18.6364
1.69992	17.5483
1.71991	13.8258
1.73991	8.9205
1.75991	3.3333
1.77991	0.4441
1.79991	0.6818
1.81991	3.9053
1.83991	9.0152
1.85991	14.321
1.87991	18.0455
1.8999	18.9384
1.9199	16.0909
1.9399	11.0492
1.9599	5.4621
1.9799	1.0312
1.9999	0.0152
2.0199	0.66
2.0399	5.1136
2.0599	11.0871
2.0799	16.4545
2.0999	19
2.11989	18.3977
2.13989	14.1544
2.15989	8.5909
2.17989	3.0038
2.19989	0.2083
2.21989	0.0426
2.23989	1.7576
2.25989	7.3674
2.27989	13.7955
2.29989	17.9044
2.31988	19
2.33988	16.6932
2.35988	11.4924
2.37988	5.1638
2.39988	0.4545
2.41988	0
2.43988	0.6402
2.45988	4.2159
2.47988	10.197
2.49988	16.1629
2.51987	19.8295
2.53987	18.5748
2.55987	14.6061
2.57987	8.7841
2.59987	3.125
2.61987	0
2.63987	0
2.65987	1.7169
2.67987	7.072
2.69987	13.2614
2.71986	17.8788
2.73986	19.5909
2.75986	17.7386
2.77986	12.3902
2.79986	6.0758
2.81986	1.5653
2.83986	0
2.85986	0.6146
2.87986	3.6364
2.89985	10.0644
2.91985	15.7197
2.93985	19.0824
2.95985	19.0152
2.97985	15.5189
2.99985	9.4432
3.01985	2.3722
3.03985	0.3636
3.05985	0
3.07985	1.7083
3.09984	6.3447
3.11984	12.5909
3.13984	18.0862
3.15984	19.8068
3.17984	17.7983
3.19984	12.697
3.21984	6.1676
3.23984	1.5455
3.25984	0
3.27984	0
3.29983	3.2812
3.31983	9.053
3.33983	15.0492
3.35983	19.2727
3.37983	19.5975
3.39983	16.1023
3.41983	9.8068
3.43983	4.0152
3.45983	0.6752
3.47983	0
3.49983	0.7623
3.51982	5.3333
3.53982	11.7614
3.55982	17.3561
3.57982	19.5227
3.59982	18.3636
3.61982	13.5265
3.63982	7.1439
3.65982	1.5568
3.67982	0.0909
3.69982	0.1184
3.71981	3.1023
3.73981	9.0417
3.75981	15.2121
3.77981	19.1023
3.79981	19.2727
3.81981	16.2642
3.83981	10.8182
3.85981	4.8456
3.87981	0.7917
3.89981	0.0085
3.9198	0.9545
3.9398	5.6629
3.9598	11.75
3.9798	16.8854
3.9998	19.2727
4.0198	18.8892
4.0398	14.2652
4.0598	8.8144
4.0798	3.5
4.09979	0.5881
4.11979	0.4545
4.13979	2.5341
4.15979	8.1212
4.17979	14.3021
4.19979	17.7727
4.21979	19.0398
4.23979	16.803
4.25979	11.9432
4.27979	6.3561
4.29979	1.929
4.31978	0.3636
4.33978	1.6903
4.35978	5.9924
4.37978	11.4205
4.39978	16.1667
4.41978	18.6354
4.43978	18.1477
4.45978	14.5947
4.47978	9.6061
4.49977	5.0028
4.51977	1
4.53977	1
4.55977	3.5455
4.57977	8.4508
4.59977	13.6288
4.61977	17.5
4.63977	18.8182
4.65977	16.9422
4.67977	12.3864
4.69977	7.7528
4.71976	3.7273
4.73976	2
4.75976	2.5341
4.77976	5.9195
4.79976	10.9091
4.81976	15.178
4.83976	17.5
4.85976	17.446
4.87976	14.9545
4.89976	10.8864
4.91975	6.4318
4.93975	3.6525
4.95975	3
4.97975	4.4972
4.99975	8.553
5.01975	13.1657
5.03975	16.1818
5.05975	17.75
5.07975	16.4735
5.09974	13.2188
5.11974	9.1515
5.13974	5.4744
5.15974	3.1023
5.17974	4.0275
5.19974	6.7424
5.21974	10.2841
5.23974	13.8977
5.25974	16.5445
5.27974	17
