# Supplementary material for: In-depth chiral sensing capability of C-dots in a biomimetic protein-based hydrogel: a probe for chiral recognition applications
Source: Royal Society of Chemistry journal article supplement (doi:10.1039/d5bm01508a), 2026-01-01
Supplement: d5bm01508a1.zip [file Figure S4.xlsx]

## Sheet: Figure S4
Angle	--	Angle	--
10.0001	405.766	10.0001	606.777
10.1977	329.766	10.1977	570.777
10.3953	347.766	10.3953	598.777
10.5928	352.766	10.5928	588.777
10.7904	366.766	10.7904	594.777
10.988	337.766	10.988	565.777
11.1856	339.766	11.1856	563.777
11.3831	332.766	11.3831	585.777
11.5807	342.766	11.5807	567.777
11.7783	337.766	11.7783	553.777
11.9759	326.766	11.9759	545.777
12.1735	328.766	12.1735	543.777
12.371	326.766	12.371	558.777
12.5686	327.766	12.5686	575.777
12.7662	314.766	12.7662	528.777
12.9638	334.766	12.9638	573.777
13.1613	315.766	13.1613	552.777
13.3589	314.766	13.3589	541.777
13.5565	321.766	13.5565	557.777
13.7541	296.766	13.7541	548.777
13.9516	303.766	13.9516	547.777
14.1492	323.766	14.1492	543.777
14.3468	296.766	14.3468	564.777
14.5444	306.766	14.5444	552.777
14.742	332.766	14.742	551.777
14.9395	332.766	14.9395	567.777
15.1371	334.766	15.1371	578.777
15.3347	330.766	15.3347	545.777
15.5323	319.766	15.5323	554.777
15.7298	301.766	15.7298	555.777
15.9274	280.766	15.9274	557.777
16.125	329.766	16.125	556.777
16.3226	318.766	16.3226	547.777
16.5202	350.766	16.5202	539.777
16.7177	334.766	16.7177	567.777
16.9153	303.766	16.9153	553.777
17.1129	322.766	17.1129	584.777
17.3105	339.766	17.3105	566.777
17.508	337.766	17.508	560.777
17.7056	364.766	17.7056	580.777
17.9032	357.766	17.9032	579.777
18.1008	362.766	18.1008	594.777
18.2983	368.766	18.2983	599.777
18.4959	362.766	18.4959	627.777
18.6935	350.766	18.6935	586.777
18.8911	347.766	18.8911	630.777
19.0887	413.766	19.0887	598.777
19.2862	367.766	19.2862	606.777
19.4838	353.766	19.4838	598.777
19.6814	419.766	19.6814	603.777
19.879	396.766	19.879	621.777
20.0765	411.766	20.0765	632.777
20.2741	397.766	20.2741	647.777
20.4717	427.766	20.4717	632.777
20.6693	411.766	20.6693	616.777
20.8669	409.766	20.8669	612.777
21.0644	423.766	21.0644	672.777
21.262	414.766	21.262	649.777
21.4596	433.766	21.4596	651.777
21.6572	443.766	21.6572	622.777
21.8547	423.766	21.8547	668.777
22.0523	408.766	22.0523	647.777
22.2499	418.766	22.2499	653.777
22.4475	436.766	22.4475	678.777
22.645	440.766	22.645	685.777
22.8426	453.766	22.8426	663.777
23.0402	465.766	23.0402	688.777
23.2378	461.766	23.2378	662.777
23.4354	469.766	23.4354	667.777
23.6329	447.766	23.6329	688.777
23.8305	459.766	23.8305	664.777
24.0281	440.766	24.0281	659.777
24.2257	454.766	24.2257	681.777
24.4232	458.766	24.4232	664.777
24.6208	457.766	24.6208	688.777
24.8184	439.766	24.8184	694.777
25.016	428.766	25.016	672.777
25.2136	487.766	25.2136	698.777
25.4111	471.766	25.4111	665.777
25.6087	453.766	25.6087	629.777
25.8063	442.766	25.8063	667.777
26.0039	444.766	26.0039	686.777
26.2014	451.766	26.2014	629.777
26.399	459.766	26.399	677.777
26.5966	415.766	26.5966	655.777
26.7942	427.766	26.7942	644.777
26.9917	433.766	26.9917	661.777
27.1893	424.766	27.1893	641.777
27.3869	432.766	27.3869	637.777
27.5845	446.766	27.5845	642.777
27.7821	434.766	27.7821	626.777
27.9796	402.766	27.9796	667.777
28.1772	407.766	28.1772	633.777
28.3748	445.766	28.3748	636.777
28.5724	409.766	28.5724	665.777
28.7699	401.766	28.7699	645.777
28.9675	410.766	28.9675	648.777
29.1651	420.766	29.1651	654.777
29.3627	438.766	29.3627	637.777
29.5603	393.766	29.5603	629.777
29.7578	414.766	29.7578	618.777
29.9554	379.766	29.9554	638.777
30.153	384.766	30.153	574.777
30.3506	428.766	30.3506	576.777
30.5481	387.766	30.5481	616.777
30.7457	372.766	30.7457	585.777
30.9433	392.766	30.9433	609.777
31.1409	389.766	31.1409	581.777
31.3384	395.766	31.3384	602.777
31.536	357.766	31.536	588.777
31.7336	369.766	31.7336	596.777
31.9312	344.766	31.9312	567.777
32.1288	369.766	32.1288	578.777
32.3263	358.766	32.3263	557.777
32.5239	361.766	32.5239	588.777
32.7215	364.766	32.7215	573.777
32.9191	348.766	32.9191	584.777
33.1166	351.766	33.1166	572.777
33.3142	324.766	33.3142	584.777
33.5118	332.766	33.5118	562.777
33.7094	309.766	33.7094	562.777
33.907	328.766	33.907	544.777
34.1045	318.766	34.1045	539.777
34.3021	350.766	34.3021	569.777
34.4997	308.766	34.4997	546.777
34.6973	330.766	34.6973	542.777
34.8948	293.766	34.8948	526.777
35.0924	330.766	35.0924	541.777
35.29	302.766	35.29	497.777
35.4876	303.766	35.4876	540.777
35.6851	290.766	35.6851	521.777
35.8827	289.766	35.8827	518.777
36.0803	310.766	36.0803	521.777
36.2779	315.766	36.2779	520.777
36.4755	288.766	36.4755	520.777
36.673	284.766	36.673	490.777
36.8706	288.766	36.8706	505.777
37.0682	283.766	37.0682	489.777
37.2658	275.766	37.2658	505.777
37.4633	271.766	37.4633	505.777
37.6609	261.766	37.6609	505.777
37.8585	289.766	37.8585	500.777
38.0561	268.766	38.0561	478.777
38.2537	261.766	38.2537	460.777
38.4512	274.766	38.4512	496.777
38.6488	279.766	38.6488	460.777
38.8464	268.766	38.8464	490.777
39.044	273.766	39.044	478.777
39.2415	276.766	39.2415	486.777
39.4391	245.766	39.4391	472.777
39.6367	258.766	39.6367	485.777
39.8343	261.766	39.8343	463.777
40.0318	248.766	40.0318	470.777
40.2294	243.766	40.2294	486.777
40.427	245.766	40.427	462.777
40.6246	264.766	40.6246	485.777
40.8222	266.766	40.8222	466.777
41.0197	271.766	41.0197	489.777
41.2173	250.766	41.2173	484.777
41.4149	246.766	41.4149	480.777
41.6125	252.766	41.6125	473.777
41.81	256.766	41.81	491.777
42.0076	249.766	42.0076	485.777
42.2052	276.766	42.2052	482.777
42.4028	227.766	42.4028	475.777
42.6004	251.766	42.6004	474.777
42.7979	256.766	42.7979	463.777
42.9955	254.766	42.9955	491.777
43.1931	257.766	43.1931	483.777
43.3907	255.766	43.3907	483.777
43.5882	269.766	43.5882	460.777
43.7858	245.766	43.7858	464.777
43.9834	262.766	43.9834	463.777
44.181	270.766	44.181	436.777
44.3785	245.766	44.3785	460.777
44.5761	258.766	44.5761	483.777
44.7737	258.766	44.7737	476.777
44.9713	255.766	44.9713	451.777
45.1689	248.766	45.1689	468.777
45.3664	246.766	45.3664	473.777
45.564	251.766	45.564	452.777
45.7616	253.766	45.7616	451.777
45.9592	252.766	45.9592	462.777
46.1567	242.766	46.1567	464.777
46.3543	232.766	46.3543	455.777
46.5519	251.766	46.5519	465.777
46.7495	260.766	46.7495	451.777
46.9471	251.766	46.9471	503.777
47.1446	230.766	47.1446	466.777
47.3422	240.766	47.3422	487.777
47.5398	232.766	47.5398	454.777
47.7374	246.766	47.7374	466.777
47.9349	244.766	47.9349	470.777
48.1325	248.766	48.1325	450.777
48.3301	262.766	48.3301	447.777
48.5277	247.766	48.5277	451.777
48.7252	236.766	48.7252	465.777
48.9228	242.766	48.9228	447.777
49.1204	253.766	49.1204	455.777
49.318	249.766	49.318	469.777
49.5156	213.766	49.5156	477.777
49.7131	265.766	49.7131	461.777
49.9107	247.766	49.9107	442.777
50.1083	241.766	50.1083	451.777
50.3059	219.766	50.3059	456.777
50.5034	238.766	50.5034	461.777
50.701	238.766	50.701	460.777
50.8986	236.766	50.8986	442.777
51.0962	224.766	51.0962	447.777
51.2938	231.766	51.2938	439.777
51.4913	231.766	51.4913	462.777
51.6889	236.766	51.6889	452.777
51.8865	242.766	51.8865	463.777
52.0841	238.766	52.0841	469.777
52.2816	229.766	52.2816	434.777
52.4792	235.766	52.4792	447.777
52.6768	222.766	52.6768	437.777
52.8744	224.766	52.8744	459.777
53.0719	228.766	53.0719	450.777
53.2695	239.766	53.2695	446.777
53.4671	242.766	53.4671	449.777
53.6647	219.766	53.6647	454.777
53.8623	224.766	53.8623	444.777
54.0598	224.766	54.0598	458.777
54.2574	225.766	54.2574	449.777
54.455	235.766	54.455	440.777
54.6526	230.766	54.6526	442.777
54.8501	219.766	54.8501	443.777
55.0477	227.766	55.0477	451.777
55.2453	227.766	55.2453	450.777
55.4429	223.766	55.4429	444.777
55.6405	234.766	55.6405	452.777
55.838	219.766	55.838	439.777
56.0356	218.766	56.0356	454.777
56.2332	226.766	56.2332	453.777
56.4308	238.766	56.4308	447.777
56.6283	229.766	56.6283	472.777
56.8259	224.766	56.8259	429.777
57.0235	223.766	57.0235	441.777
57.2211	248.766	57.2211	451.777
57.4186	219.766	57.4186	453.777
57.6162	234.766	57.6162	466.777
57.8138	238.766	57.8138	443.777
58.0114	216.766	58.0114	443.777
58.209	237.766	58.209	439.777
58.4065	234.766	58.4065	446.777
58.6041	233.766	58.6041	443.777
58.8017	225.766	58.8017	432.777
58.9993	227.766	58.9993	458.777
59.1968	233.766	59.1968	438.777
59.3944	237.766	59.3944	439.777
59.592	248.766	59.592	446.777
59.7896	234.766	59.7896	427.777
59.9872	208.766	59.9872	452.777
60.1847	254.766	60.1847	452.777
60.3823	231.766	60.3823	439.777
60.5799	232.766	60.5799	450.777
60.7775	220.766	60.7775	422.777
60.975	238.766	60.975	438.777
61.1726	235.766	61.1726	458.777
61.3702	229.766	61.3702	448.777
61.5678	217.766	61.5678	450.777
61.7654	236.766	61.7654	460.777
61.9629	233.766	61.9629	436.777
62.1605	246.766	62.1605	450.777
62.3581	225.766	62.3581	433.777
62.5557	228.766	62.5557	437.777
62.7532	233.766	62.7532	447.777
62.9508	233.766	62.9508	441.777
63.1484	219.766	63.1484	440.777
63.346	234.766	63.346	438.777
63.5435	227.766	63.5435	435.777
63.7411	232.766	63.7411	450.777
63.9387	225.766	63.9387	440.777
64.1363	227.766	64.1363	434.777
64.3339	230.766	64.3339	444.777
64.5314	238.766	64.5314	435.777
64.729	236.766	64.729	433.777
64.9266	220.766	64.9266	438.777
65.1242	223.766	65.1242	441.777
65.3217	223.766	65.3217	442.777
65.5193	230.766	65.5193	452.777
65.7169	214.766	65.7169	445.777
65.9145	211.766	65.9145	444.777
66.1121	223.766	66.1121	432.777
66.3096	243.766	66.3096	439.777
66.5072	239.766	66.5072	447.777
66.7048	219.766	66.7048	450.777
66.9024	210.766	66.9024	425.777
67.0999	226.766	67.0999	429.777
67.2975	216.766	67.2975	454.777
67.4951	210.766	67.4951	430.777
67.6927	222.766	67.6927	441.777
67.8902	219.766	67.8902	440.777
68.0878	218.766	68.0878	431.777
68.2854	211.766	68.2854	423.777
68.483	237.766	68.483	428.777
68.6806	221.766	68.6806	438.777
68.8781	230.766	68.8781	427.777
69.0757	210.766	69.0757	438.777
69.2733	214.766	69.2733	435.777
69.4709	211.766	69.4709	440.777
69.6684	212.766	69.6684	446.777
69.866	204.766	69.866	434.777
70.0636	238.766	70.0636	403.777
70.2612	217.766	70.2612	424.777
70.4588	219.766	70.4588	428.777
70.6563	211.766	70.6563	436.777
70.8539	214.766	70.8539	447.777
71.0515	206.766	71.0515	421.777
71.2491	209.766	71.2491	425.777
71.4466	206.766	71.4466	431.777
71.6442	203.766	71.6442	432.777
71.8418	220.766	71.8418	436.777
72.0394	218.766	72.0394	415.777
72.2369	215.766	72.2369	410.777
72.4345	205.766	72.4345	422.777
72.6321	200.766	72.6321	435.777
72.8297	230.766	72.8297	433.777
73.0273	215.766	73.0273	423.777
73.2248	201.766	73.2248	425.777
73.4224	198.766	73.4224	442.777
73.62	209.766	73.62	415.777
73.8176	203.766	73.8176	419.777
74.0151	207.766	74.0151	440.777
74.2127	209.766	74.2127	413.777
74.4103	210.766	74.4103	429.777
74.6079	211.766	74.6079	407.777
74.8055	221.766	74.8055	419.777
75.003	205.766	75.003	421.777
75.2006	213.766	75.2006	430.777
75.3982	209.766	75.3982	411.777
75.5958	196.766	75.5958	435.777
75.7933	200.766	75.7933	427.777
75.9909	209.766	75.9909	411.777
76.1885	207.766	76.1885	414.777
76.3861	200.766	76.3861	416.777
76.5836	208.766	76.5836	417.777
76.7812	190.766	76.7812	422.777
76.9788	188.766	76.9788	414.777
77.1764	202.766	77.1764	418.777
77.374	197.766	77.374	420.777
77.5715	196.766	77.5715	412.777
77.7691	204.766	77.7691	421.777
77.9667	203.766	77.9667	398.777
78.1643	201.766	78.1643	440.777
78.3618	199.766	78.3618	413.777
78.5594	212.766	78.5594	414.777
78.757	200.766	78.757	399.777
78.9546	204.766	78.9546	416.777
79.1522	193.766	79.1522	423.777
79.3497	190.766	79.3497	429.777
79.5473	191.766	79.5473	415.777
79.7449	203.766	79.7449	405.777
79.9425	201.766	79.9425	414.777
80.14	185.766	80.14	424.777
80.3376	199.766	80.3376	403.777
80.5352	196.766	80.5352	425.777
80.7328	219.766	80.7328	403.777
80.9303	190.766	80.9303	412.777
81.1279	198.766	81.1279	404.777
81.3255	207.766	81.3255	413.777
81.5231	184.766	81.5231	415.777
81.7207	192.766	81.7207	413.777
81.9182	199.766	81.9182	411.777
82.1158	197.766	82.1158	401.777
82.3134	188.766	82.3134	407.777
82.511	201.766	82.511	423.777
82.7085	194.766	82.7085	407.777
82.9061	195.766	82.9061	414.777
83.1037	195.766	83.1037	402.777
83.3013	197.766	83.3013	409.777
83.4989	195.766	83.4989	424.777
83.6964	194.766	83.6964	408.777
83.894	193.766	83.894	412.777
84.0916	194.766	84.0916	417.777
84.2892	204.766	84.2892	405.777
84.4867	185.766	84.4867	410.777
84.6843	198.766	84.6843	409.777
84.8819	183.766	84.8819	406.777
85.0795	180.766	85.0795	408.777
85.277	183.766	85.277	403.777
85.4746	195.766	85.4746	398.777
85.6722	190.766	85.6722	405.777
85.8698	182.766	85.8698	426.777
86.0674	176.766	86.0674	404.777
86.2649	188.766	86.2649	412.777
86.4625	191.766	86.4625	400.777
86.6601	181.766	86.6601	395.777
86.8577	195.766	86.8577	399.777
87.0552	187.766	87.0552	388.777
87.2528	175.766	87.2528	407.777
87.4504	181.766	87.4504	408.777
87.648	199.766	87.648	403.777
87.8456	182.766	87.8456	410.777
88.0431	187.766	88.0431	394.777
88.2407	191.766	88.2407	392.777
88.4383	192.766	88.4383	400.777
88.6359	196.766	88.6359	399.777
88.8334	193.766	88.8334	392.777
89.031	187.766	89.031	398.777
89.2286	194.766	89.2286	401.777
89.4262	185.766	89.4262	403.777
89.6237	194.766	89.6237	412.777
89.8213	177.766	89.8213	402.777
90.0189	173.766	90.0189	400.777
90.2165	187.766	90.2165	400.777
