# Supplementary material for: In-depth chiral sensing capability of C-dots in a biomimetic protein-based hydrogel: a probe for chiral recognition applications
Source: Royal Society of Chemistry journal article supplement (doi:10.1039/d5bm01508a), 2026-01-01
Supplement: d5bm01508a1.zip [file Figure S5.xlsx]

## Sheet: Figure S5 (a)
550.577	0.7694	0.000452454	0.000584592	0.53264
551.542	0.76244	0	0.000804386	0.55148
552.506	0.75566	8.08508e-05	0.00147	0.57554
553.47	0.74903	0.000701225	0.00251	0.60339
554.434	0.74257	0.00164	0.00378	0.63336
555.399	0.73644	0.00261	0.00509	0.66382
556.363	0.73095	0.00338	0.00624	0.69346
557.327	0.72663	0.00394	0.00718	0.72135
558.291	0.72413	0.00448	0.00807	0.74705
559.255	0.72414	0.00523	0.00915	0.77039
560.22	0.72719	0.0064	0.01069	0.79147
561.184	0.73342	0.008	0.0127	0.81043
562.148	0.74253	0.00992	0.01497	0.82746
563.112	0.75374	0.01189	0.01708	0.84279
564.077	0.76605	0.0137	0.01871	0.85666
565.041	0.77835	0.0152	0.01974	0.86933
566.005	0.78965	0.01636	0.02036	0.88099
566.969	0.79908	0.01721	0.02086	0.89174
567.933	0.80595	0.01785	0.02149	0.9015
568.898	0.80971	0.01843	0.02226	0.91007
569.862	0.81005	0.01909	0.02308	0.91714
570.826	0.8069	0.01998	0.0239	0.92239
571.79	0.80037	0.02123	0.02484	0.92554
572.755	0.79081	0.02292	0.02612	0.92638
573.719	0.77874	0.02498	0.02792	0.92485
574.683	0.765	0.02723	0.03011	0.92107
575.647	0.75071	0.02933	0.03233	0.91534
576.612	0.73716	0.03095	0.03413	0.90809
577.576	0.72557	0.0319	0.03529	0.89982
578.54	0.71685	0.03221	0.03597	0.89098
579.504	0.71146	0.03216	0.03653	0.88193
580.469	0.70939	0.03215	0.03724	0.87286
581.433	0.71026	0.03253	0.03811	0.86375
582.397	0.71347	0.03346	0.03888	0.85438
583.361	0.7183	0.03488	0.0393	0.8443
584.326	0.72407	0.03656	0.03932	0.83288
585.29	0.73017	0.03822	0.03917	0.81942
586.254	0.73612	0.03965	0.03924	0.80321
587.218	0.74148	0.0408	0.03982	0.78361
588.182	0.74585	0.04175	0.04105	0.76011
589.147	0.74886	0.04266	0.04284	0.73232
590.111	0.75013	0.04368	0.045	0.7001
591.075	0.74938	0.04489	0.04724	0.6637
592.039	0.74642	0.04626	0.04923	0.62396
593.004	0.74122	0.04764	0.05067	0.58233
593.968	0.7339	0.04882	0.05142	0.54081
594.932	0.72455	0.0497	0.05154	0.50171
595.896	0.71323	0.05028	0.05132	0.46761
596.861	0.69984	0.05071	0.05115	0.44125
597.825	0.68425	0.05121	0.05138	0.42542
598.789	0.66633	0.05192	0.05217	0.42248
599.753	0.64618	0.05287	0.05351	0.4337
600.717	0.62412	0.054	0.05527	0.45873
601.682	0.60085	0.05527	0.05733	0.49574
602.646	0.57742	0.05675	0.05965	0.54183
603.61	0.5552	0.05858	0.06217	0.59372
604.574	0.53586	0.06088	0.06475	0.64814
605.539	0.5211	0.06356	0.06714	0.70213
606.503	0.51244	0.06631	0.06909	0.75334
607.467	0.51095	0.06875	0.07049	0.80018
608.431	0.51707	0.07068	0.07149	0.84178
609.396	0.53045	0.07217	0.07241	0.8778
610.36	0.54992	0.07351	0.07355	0.9082
611.324	0.57365	0.07502	0.07506	0.93311
612.288	0.59955	0.07682	0.07684	0.95284
613.253	0.62566	0.07877	0.07862	0.96788
614.217	0.65035	0.08064	0.08018	0.97883
615.181	0.67214	0.08226	0.08147	0.98622
616.145	0.68961	0.08371	0.08263	0.99047
617.109	0.7014	0.08522	0.08396	0.99187
618.074	0.70658	0.08703	0.08573	0.99073
619.038	0.70505	0.08914	0.08796	0.98752
620.002	0.69754	0.09131	0.09045	0.98273
620.966	0.68534	0.09322	0.09285	0.97679
621.931	0.66997	0.0947	0.09482	0.96993
622.895	0.6531	0.09578	0.09617	0.96218
623.859	0.63653	0.09667	0.09691	0.9535
624.823	0.62193	0.09768	0.09728	0.94388
625.788	0.61119	0.09879	0.09749	0.93316
626.752	0.60539	0.09992	0.09781	0.92127
627.716	0.60503	0.10089	0.09841	0.908
628.68	0.61013	0.10166	0.09938	0.89312
629.644	0.62038	0.10237	0.10072	0.87637
630.609	0.63515	0.10332	0.10236	0.85756
631.573	0.65343	0.10475	0.10416	0.83658
632.537	0.67383	0.10665	0.10592	0.81351
633.501	0.69469	0.10868	0.10738	0.78867
634.466	0.71426	0.11034	0.10839	0.76272
635.43	0.73103	0.11127	0.10893	0.73666
636.394	0.74395	0.11147	0.10921	0.71177
637.358	0.75258	0.11134	0.10955	0.68949
638.323	0.75696	0.11136	0.11023	0.67126
639.287	0.75751	0.11188	0.11139	0.65846
640.251	0.75476	0.11293	0.11291	0.65223
641.215	0.74929	0.11428	0.11454	0.65337
642.179	0.74171	0.11566	0.11596	0.66209
643.144	0.73261	0.1169	0.11694	0.67793
644.108	0.72256	0.11798	0.11741	0.69988
645.072	0.71203	0.11896	0.11745	0.72672
646.036	0.70137	0.11991	0.11725	0.75714
647.001	0.69095	0.12088	0.1171	0.78973
647.965	0.6813	0.12198	0.11732	0.82279
648.929	0.67314	0.12334	0.11817	0.85429
649.893	0.66723	0.12512	0.11979	0.88215
650.858	0.66411	0.12738	0.12206	0.90484
651.822	0.66393	0.13006	0.12468	0.92167
652.786	0.66671	0.13297	0.12732	0.93283
653.75	0.67258	0.13587	0.12975	0.939
654.715	0.68173	0.13851	0.13194	0.94113
655.679	0.69419	0.14075	0.13394	0.94027
656.643	0.70968	0.14255	0.13576	0.93745
657.607	0.72781	0.14399	0.13736	0.93356
658.572	0.74856	0.14525	0.13869	0.92925
659.536	0.7722	0.14655	0.13986	0.9248
660.5	0.79859	0.14809	0.14123	0.92032
661.464	0.82622	0.15	0.14328	0.91605
662.428	0.85221	0.15235	0.14627	0.91248
663.393	0.87333	0.15526	0.15018	0.91007
664.357	0.88713	0.15878	0.15466	0.90898
665.321	0.89296	0.16265	0.15894	0.9087
666.285	0.893	0.16601	0.16178	0.9079
667.25	0.89275	0.16769	0.16184	0.90404
668.214	0.8984	0.1676	0.15946	0.89406
669.178	0.91044	0.16714	0.15736	0.87767
670.142	0.92324	0.16714	0.15736	0.8589
671.106	0.93203	0.16753	0.15891	0.84094
672.071	0.93487	0.16847	0.16114	0.8244
673.035	0.93192	0.17019	0.16367	0.80908
673.999	0.92478	0.17251	0.16628	0.79465
674.963	0.91558	0.17488	0.16877	0.78082
675.928	0.90617	0.17672	0.17097	0.76747
676.892	0.89757	0.1778	0.17281	0.75464
677.856	0.89003	0.17837	0.17433	0.74233
678.82	0.8834	0.17899	0.17559	0.73035
679.785	0.87768	0.18014	0.1767	0.71839
680.749	0.87323	0.18197	0.17779	0.70629
681.713	0.87055	0.18434	0.17904	0.69417
682.677	0.87	0.18693	0.18062	0.68232
683.641	0.8716	0.18945	0.18266	0.67109
684.606	0.8752	0.19177	0.18519	0.66085
685.57	0.88076	0.19395	0.18811	0.65194
686.534	0.88833	0.19611	0.19121	0.6447
687.499	0.89793	0.19831	0.19428	0.63932
688.463	0.90935	0.20051	0.19713	0.6358
689.427	0.92206	0.20266	0.19973	0.63392
690.391	0.93532	0.20477	0.20218	0.63339
691.355	0.94836	0.20696	0.20465	0.63397
692.32	0.9605	0.20937	0.20723	0.63552
693.284	0.97118	0.21207	0.20994	0.63809
694.248	0.97996	0.21495	0.2127	0.64198
695.212	0.98655	0.2178	0.21539	0.64793
696.177	0.99078	0.22042	0.21794	0.65714
697.141	0.99259	0.22274	0.22035	0.67113
698.105	0.99204	0.22483	0.22274	0.69126
699.069	0.98927	0.22682	0.22523	0.71816
700.034	0.98456	0.22878	0.22794	0.75119
700.998	0.97833	0.23073	0.23085	0.78839
701.962	0.97111	0.23262	0.23387	0.82681
702.926	0.96351	0.23447	0.23683	0.86318
703.89	0.956	0.23641	0.23957	0.89463
704.855	0.94906	0.23856	0.242	0.91926
705.819	0.94296	0.24094	0.24412	0.93631
706.783	0.93783	0.24348	0.24598	0.94606
707.747	0.93367	0.24602	0.24773	0.94948
708.712	0.93038	0.24841	0.24945	0.94778
709.676	0.92788	0.25063	0.25125	0.94212
710.64	0.92613	0.25277	0.25322	0.93339
711.604	0.92515	0.25495	0.25544	0.92228
712.568	0.92492	0.25724	0.25796	0.90939
713.533	0.92524	0.2596	0.26071	0.89537
714.497	0.9257	0.26186	0.26348	0.88091
715.461	0.92125	0.26561	0.26717	0.86732
716.426	0.92156	0.26694	0.2689	0.85364
717.39	0.92119	0.2679	0.26999	0.84088
718.354	0.91967	0.26887	0.27069	0.82911
719.318	0.91631	0.27034	0.27151	0.81835
720.282	0.91047	0.27263	0.27299	0.80867
721.247	0.90212	0.27575	0.27536	0.80013
722.211	0.89208	0.27932	0.27851	0.79263
723.175	0.8817	0.28282	0.28206	0.78578
724.139	0.87248	0.28585	0.28559	0.77904
725.104	0.86581	0.28829	0.28882	0.77187
726.068	0.86276	0.29025	0.29169	0.76392
727.032	0.86366	0.292	0.29426	0.75507
727.996	0.86767	0.2938	0.29667	0.74537
728.961	0.87293	0.29586	0.29907	0.73499
729.925	0.87728	0.29824	0.30153	0.72412
730.889	0.87922	0.3009	0.304	0.713
731.853	0.87849	0.30371	0.3064	0.7019
732.817	0.87619	0.30649	0.3086	0.69113
733.782	0.8744	0.30907	0.31057	0.68095
734.746	0.87544	0.31132	0.31236	0.67152
735.71	0.88109	0.31326	0.31409	0.66285
736.674	0.89189	0.31499	0.31591	0.6548
737.639	0.90704	0.3167	0.31791	0.64714
738.603	0.92474	0.31856	0.32009	0.63955
739.567	0.94285	0.32066	0.32241	0.63174
740.531	0.95944	0.32304	0.3248	0.62343
741.495	0.9733	0.32564	0.3272	0.61443
742.46	0.98398	0.32832	0.32955	0.60462
743.424	0.99157	0.33093	0.33182	0.59401
744.388	0.99649	0.33334	0.33398	0.58269
745.352	0.99916	0.33544	0.33609	0.57083
746.317	1	0.33727	0.33826	0.55866
747.281	0.99936	0.33896	0.34062	0.54646
748.245	0.99761	0.34071	0.34321	0.5345
749.209	0.99514	0.3427	0.34596	0.52302
750.174	0.99232	0.345	0.34866	0.51217
751.138	0.98947	0.34754	0.35111	0.50197
752.102	0.98677	0.35012	0.35321	0.49236
753.066	0.98433	0.35254	0.35504	0.48317
754.031	0.98212	0.35468	0.35683	0.47416
754.995	0.98006	0.35662	0.35882	0.4651
755.959	0.97799	0.35855	0.36117	0.45574
756.923	0.97573	0.36072	0.36384	0.4459
757.888	0.9731	0.36328	0.3667	0.43545
758.852	0.96992	0.3662	0.36957	0.42439
759.816	0.96611	0.36925	0.37229	0.41284
760.78	0.96165	0.37212	0.37483	0.40101
761.744	0.95659	0.37456	0.37719	0.38922
762.709	0.95107	0.37654	0.3794	0.37783
763.673	0.94526	0.37824	0.38152	0.3672
764.637	0.93937	0.37995	0.38358	0.35765
765.601	0.93357	0.38191	0.38563	0.34941
766.566	0.92801	0.38418	0.3877	0.34257
767.53	0.92278	0.38665	0.38984	0.33711
768.494	0.91789	0.3891	0.39209	0.33284
769.458	0.91326	0.3914	0.39448	0.32948
770.423	0.90875	0.39354	0.39701	0.32666
771.387	0.90418	0.39562	0.3996	0.32398
772.351	0.89935	0.39773	0.40215	0.32104
773.315	0.89409	0.39994	0.40455	0.3175
774.279	0.88828	0.40221	0.4067	0.31309
775.244	0.88186	0.40443	0.40861	0.30762
776.208	0.87485	0.40654	0.41037	0.301
777.172	0.86735	0.40851	0.41211	0.2933
778.136	0.85953	0.41038	0.41395	0.28491
779.101	0.85163	0.41223	0.41592	0.27665
780.065	0.84395	0.41408	0.41797	0.26986
781.029	0.83678	0.41598	0.42	0.26626
781.993	0.83038	0.41792	0.42193	0.26761
782.958	0.82493	0.41988	0.42373	0.27529
783.922	0.82046	0.42179	0.42537	0.28975
784.886	0.81687	0.4236	0.42689	0.3104
785.85	0.81393	0.42525	0.42827	0.33566
786.814	0.81132	0.4267	0.42948	0.36343
787.779	0.80871	0.42796	0.43049	0.39162
788.743	0.80575	0.42908	0.4313	0.41851
789.707	0.80214	0.43009	0.43193	0.44295
790.671	0.79762	0.431	0.43246	0.46438
791.636	0.792	0.4318	0.43297	0.48265
792.6	0.78511	0.43247	0.43346	0.49794
793.564	0.77682	0.43299	0.43388	0.51065
794.528	0.76706	0.43339	0.43411	0.52129
795.493	0.75583	0.43369	0.43405	0.53051
796.457	0.74317	0.4339	0.43371	0.53904
797.421	0.7292	0.43408	0.43322	0.54762
798.385	0.71411	0.43433	0.43282	0.5569
799.35	0.69818	0.43482	0.43276	0.56745
800.314	0.68187	0.43569	0.43319	0.57961
801.278	0.66586	0.43699	0.43406	0.5935
802.242	0.65118	0.43858	0.43523	0.60897
803.207	0.63909	0.44018	0.43647	0.62565
804.171	0.63099	0.44154	0.43767	0.64294
805.135	0.628	0.4426	0.43886	0.6601
806.099	0.63061	0.4435	0.44014	0.67632
807.063	0.63844	0.44455	0.44161	0.69073
808.028	0.65021	0.44601	0.44323	0.70245
808.992	0.66405	0.44789	0.44483	0.7106
809.956	0.67797	0.45001	0.44615	0.71425
810.92	0.6902	0.45203	0.44705	0.71245
811.885	0.69942	0.45372	0.44762	0.70438
812.849	0.70494	0.45507	0.44818	0.68965
813.813	0.70671	0.45625	0.44916	0.66876
814.777	0.70528	0.45752	0.45089	0.64341
815.741	0.70176	0.45911	0.45345	0.61659
816.706	0.69757	0.46114	0.45664	0.59214
817.67	0.69411	0.46365	0.46011	0.57398
818.634	0.69241	0.46661	0.46352	0.56502
819.598	0.69281	0.46999	0.46673	0.56638
820.563	0.695	0.47366	0.46976	0.57726
821.527	0.69812	0.47743	0.47271	0.59547
822.491	0.70116	0.48104	0.47565	0.61837
823.455	0.70326	0.48426	0.47855	0.64354
824.42	0.70393	0.48703	0.48133	0.66922
825.384	0.70314	0.48948	0.48391	0.69428
826.348	0.70136	0.49191	0.48635	0.71805
827.312	0.69944	0.49465	0.48879	0.74004
828.277	0.69839	0.49792	0.49144	0.75989
829.241	0.69909	0.50175	0.49452	0.7773
830.205	0.70196	0.50605	0.49816	0.79213
831.169	0.70681	0.51065	0.50246	0.80437
832.134	0.71292	0.51545	0.50743	0.81422
833.098	0.71926	0.52043	0.51303	0.822
834.062	0.72487	0.52558	0.51915	0.82813
835.026	0.72911	0.53085	0.5256	0.83306
835.99	0.73174	0.53613	0.5321	0.83728
836.955	0.73284	0.5412	0.53838	0.84123
837.919	0.73267	0.54592	0.54422	0.84526
838.883	0.73152	0.55024	0.54951	0.84963
839.847	0.72963	0.55431	0.55428	0.85442
840.812	0.72719	0.55835	0.5587	0.85959
841.776	0.72433	0.56256	0.56294	0.86498
842.74	0.72114	0.56699	0.56707	0.87034
843.704	0.71766	0.57147	0.57109	0.87538
844.668	0.71389	0.57568	0.57489	0.87981
845.633	0.70977	0.57935	0.57837	0.8834
846.597	0.70521	0.58236	0.58151	0.886
847.561	0.70014	0.58484	0.58445	0.88757
848.525	0.69448	0.58706	0.58736	0.88816
849.49	0.68822	0.58936	0.59042	0.88791
850.454	0.68136	0.59196	0.59371	0.88703
851.418	0.67399	0.59495	0.59714	0.8858
852.382	0.6662	0.59827	0.60051	0.88448
853.347	0.65815	0.60178	0.60364	0.8833
854.311	0.65001	0.60531	0.60642	0.88245
855.275	0.64192	0.60873	0.6089	0.88198
856.239	0.63399	0.61192	0.61127	0.88185
857.204	0.62631	0.61477	0.61374	0.88189
858.168	0.61887	0.61727	0.61642	0.88184
859.132	0.61164	0.61948	0.61925	0.8814
860.096	0.60455	0.62154	0.62207	0.88026
861.061	0.59749	0.62361	0.62471	0.87813
862.025	0.59032	0.62581	0.62715	0.87475
862.989	0.58295	0.62819	0.62945	0.86996
863.953	0.57528	0.63068	0.63178	0.86365
864.917	0.56726	0.63317	0.63424	0.85578
865.882	0.55888	0.63555	0.63682	0.84641
866.846	0.55019	0.63779	0.63941	0.83561
867.81	0.54129	0.6399	0.64186	0.82347
868.774	0.53234	0.6419	0.64404	0.81014
869.739	0.52349	0.64373	0.64591	0.79573
870.703	0.51492	0.64532	0.64746	0.78042
871.667	0.50676	0.64662	0.64877	0.7644
872.631	0.49911	0.64763	0.64991	0.74791
873.596	0.492	0.64851	0.65104	0.73115
874.56	0.4854	0.64944	0.65234	0.71427
875.524	0.4792	0.65061	0.65394	0.69733
876.488	0.4733	0.65206	0.65587	0.6804
877.452	0.46756	0.65373	0.65801	0.66368
878.417	0.46187	0.65547	0.66016	0.64771
879.381	0.45616	0.65721	0.66216	0.6335
880.345	0.45041	0.65892	0.66393	0.62257
881.309	0.44464	0.66066	0.66557	0.61671
882.274	0.43893	0.66251	0.66721	0.61763
883.238	0.43342	0.66448	0.66898	0.6265
884.202	0.42824	0.66652	0.67089	0.6436
885.166	0.42357	0.66856	0.6729	0.66816
886.131	0.41954	0.67052	0.67493	0.69849
887.095	0.41626	0.67241	0.67691	0.73229
888.059	0.41378	0.67425	0.67882	0.76705
889.023	0.41205	0.67604	0.68067	0.80039
889.987	0.41092	0.67774	0.68243	0.83029
890.952	0.41013	0.6793	0.68408	0.85519
891.916	0.40932	0.68065	0.68559	0.87395
892.88	0.40813	0.68179	0.687	0.88586
893.844	0.40619	0.68281	0.68836	0.89058
894.809	0.40322	0.68385	0.68977	0.88817
895.773	0.39909	0.68507	0.69127	0.87898
896.737	0.39378	0.6865	0.69283	0.86363
897.701	0.38741	0.68808	0.69435	0.84286
898.666	0.38022	0.68965	0.69573	0.81762
899.63	0.37249	0.69107	0.69692	0.78934
900.594	0.36459	0.69229	0.69795	0.7602
901.558	0.35695	0.69338	0.69894	0.73338
902.523	0.35005	0.69448	0.70003	0.71279
903.487	0.34433	0.69572	0.70128	0.70235
904.451	0.34009	0.69708	0.70262	0.70477
905.415	0.3374	0.69848	0.70394	0.7204
906.38	0.33604	0.69975	0.70509	0.74694
907.344	0.33561	0.70081	0.70597	0.78004
908.308	0.33559	0.70166	0.70661	0.81475
909.272	0.33557	0.70237	0.70704	0.8468
910.236	0.33526	0.70298	0.70731	0.87342
911.201	0.33453	0.70347	0.70742	0.89348
912.165	0.33338	0.70372	0.70728	0.9071
913.129	0.33185	0.70359	0.70679	0.91502
914.093	0.33	0.70301	0.70586	0.91812
915.058	0.32791	0.70197	0.70447	0.91722
916.022	0.32572	0.70054	0.70266	0.91303
916.986	0.32364	0.69877	0.7005	0.90625
917.95	0.32191	0.69663	0.69799	0.89753
918.914	0.32083	0.69405	0.6951	0.88748
919.879	0.32062	0.69097	0.69168	0.87654
920.843	0.32143	0.68741	0.6876	0.86499
921.807	0.32329	0.68344	0.68273	0.85292
922.771	0.32614	0.67913	0.67708	0.84031
923.736	0.32978	0.67444	0.67068	0.82705
924.7	0.33395	0.66922	0.66362	0.81296
925.664	0.33832	0.66326	0.65593	0.79777
926.628	0.34253	0.6564	0.6475	0.78111
927.593	0.34622	0.64859	0.63818	0.76259
928.557	0.34909	0.63988	0.62776	0.74201
929.521	0.35086	0.63031	0.61609	0.71963
930.485	0.35131	0.61991	0.60318	0.69645
931.449	0.35029	0.60865	0.58921	0.67411
932.414	0.34769	0.59659	0.57447	0.65455
933.378	0.34347	0.58391	0.55934	0.63943
934.342	0.33777	0.57096	0.5442	0.62948
935.307	0.33087	0.55814	0.52936	0.62434
936.271	0.32327	0.54584	0.51511	0.6227
937.235	0.3156	0.5344	0.50173	0.62294
938.199	0.30854	0.52404	0.48949	0.62363
939.163	0.3028	0.51491	0.47863	0.62395
940.128	0.299	0.50711	0.46929	0.62369
941.092	0.29775	0.50067	0.46155	0.62319
942.056	0.2995	0.49558	0.4554	0.623
943.02	0.30441	0.49171	0.45076	0.6237
943.985	0.31229	0.48879	0.44736	0.62579
944.949	0.32246	0.48636	0.44465	0.62955
945.913	0.33396	0.48379	0.44179	0.63513
946.877	0.34576	0.48045	0.43793	0.64253
947.841	0.35711	0.47594	0.4325	0.65168
948.806	0.3677	0.47034	0.4256	0.66247
949.77	0.37766	0.46421	0.41802	0.67476
950.734	0.38734	0.45841	0.41093	0.68841
951.698	0.39712	0.45369	0.40529	0.70319
952.663	0.40718	0.4505	0.40157	0.71878
953.627	0.41752	0.44894	0.39979	0.73474
954.591	0.42804	0.44907	0.39991	0.75053
955.555	0.43867	0.45108	0.40214	0.76559
956.52	0.44942	0.45528	0.40687	0.77936
957.484	0.46038	0.46174	0.41428	0.79138
958.448	0.47163	0.46989	0.42375	0.8013
959.412	0.4832	0.47846	0.43374	0.80894
960.376	0.49508	0.48582	0.44231	0.81428
961.341	0.50725	0.49065	0.44788	0.81745
962.305	0.51964	0.4925	0.44998	0.81876
963.269	0.53222	0.49206	0.44949	0.81856
964.234	0.54495	0.49085	0.44822	0.81731
965.198	0.55778	0.49059	0.44815	0.81546
966.162	0.57064	0.49267	0.45086	0.81346
967.126	0.58342	0.49785	0.45718	0.81169
968.09	0.59601	0.5063	0.46728	0.81044
969.055	0.60825	0.51777	0.48089	0.80994
970.019	0.61994	0.53187	0.49755	0.8103
970.983	0.63088	0.54812	0.51669	0.81153
971.947	0.64082	0.566	0.53771	0.81361
972.912	0.6496	0.58494	0.55994	0.81649
973.876	0.65719	0.60431	0.58273	0.82011
974.84	0.66372	0.6235	0.6054	0.82444
975.804	0.66946	0.64195	0.62737	0.82945
976.769	0.67466	0.65922	0.64809	0.83518
977.733	0.67936	0.67501	0.66716	0.84165
978.697	0.68324	0.68912	0.68431	0.84889
979.661	0.68577	0.70148	0.69945	0.85694
980.625	0.68641	0.71211	0.71263	0.86579
981.59	0.68502	0.72111	0.72396	0.87537
982.554	0.68194	0.72866	0.73358	0.88558
983.518	0.67797	0.73498	0.74164	0.89622
984.482	0.67409	0.74031	0.7483	0.90706
985.447	0.67111	0.74489	0.75377	0.91781
986.411	0.66967	0.74893	0.75827	0.92818
987.375	0.67035	0.75252	0.76205	0.93789
988.339	0.67391	0.7557	0.76531	0.9467
989.303	0.68129	0.75842	0.76819	0.95447
990.268	0.69336	0.76064	0.77077	0.96114
991.232	0.71037	0.76241	0.77307	0.96674
992.196	0.73167	0.76384	0.77514	0.97136
993.16	0.75573	0.76509	0.77698	0.97516
994.125	0.7806	0.76628	0.77862	0.97834
995.089	0.80453	0.76745	0.78006	0.98112
996.053	0.82637	0.76854	0.78127	0.98368
997.017	0.84564	0.76943	0.78226	0.98618
997.982	0.86238	0.77006	0.78304	0.98867
998.946	0.87677	0.77044	0.78364	0.99117
999.91	0.88902	0.77066	0.78416	0.9936
1000.87	0.89923	0.77086	0.7847	0.99585
1001.84	0.9075	0.77112	0.78533	0.99774
1002.8	0.914	0.77143	0.78607	0.99914
1003.77	0.91901	0.77175	0.7869	0.99993
1004.73	0.9229	0.77199	0.78776	1
1005.7	0.92606	0.7721	0.78858	0.99935
1006.66	0.92888	0.77203	0.78929	0.99803
1007.62	0.93173	0.77177	0.78982	0.99618
1008.59	0.93488	0.77131	0.79013	0.99394
1009.55	0.93853	0.77065	0.79022	0.99151
1010.52	0.94273	0.76983	0.79009	0.98906
1011.48	0.9474	0.76895	0.78984	0.98672
1012.45	0.95233	0.76816	0.78955	0.98457
1013.41	0.95725	0.76761	0.78936	0.98261
1014.37	0.9618	0.76739	0.78933	0.98075
1015.34	0.96565	0.7675	0.78951	0.97882
1016.3	0.96847	0.7679	0.78987	0.97661
1017.27	0.97005	0.76849	0.79035	0.97389
1018.23	0.97026	0.76919	0.79086	0.97045
1019.19	0.96914	0.76997	0.79129	0.96613
1020.16	0.96686	0.77085	0.79157	0.96085
1021.12	0.96368	0.77183	0.79164	0.95463
1022.09	0.95996	0.77291	0.79154	0.94759
1023.05	0.9561	0.77405	0.79134	0.93987
1024.02	0.95246	0.77518	0.79116	0.9317
1024.98	0.94934	0.7762	0.79104	0.92327
1025.94	0.94696	0.77709	0.791	0.91479
1026.91	0.9454	0.77783	0.79097	0.90642
1027.87	0.9446	0.77848	0.79089	0.89828
1028.84	0.94439	0.77906	0.79068	0.8904
1029.8	0.94449	0.77954	0.79027	0.88279
1030.77	0.94456	0.77979	0.78959	0.87532
1031.73	0.94426	0.77964	0.78857	0.86783
1032.69	0.94325	0.77896	0.78717	0.86009
1033.66	0.94129	0.77778	0.78541	0.8518
1034.62	0.9382	0.7763	0.78339	0.8427
1035.59	0.93394	0.77474	0.78121	0.83254
1036.55	0.92856	0.77323	0.77891	0.82113
1037.52	0.9222	0.7717	0.77639	0.80838
1038.48	0.91502	0.76989	0.77346	0.7943
1039.44	0.90723	0.76752	0.76993	0.77898
1040.41	0.89899	0.76447	0.76575	0.76262
1041.37	0.89043	0.7608	0.76096	0.74548
1042.34	0.88166	0.75669	0.7557	0.7279
1043.3	0.87275	0.75231	0.75006	0.71023
1044.26	0.86375	0.74765	0.74403	0.69287
1045.23	0.85475	0.74255	0.73753	0.67622
1046.19	0.84588	0.7368	0.73043	0.66065
1047.16	0.83731	0.73025	0.72268	0.64654
1048.12	0.82929	0.72296	0.7143	0.63418
1049.09	0.8221	0.7151	0.70539	0.62385
1050.05	0.81607	0.70693	0.69609	0.61578
1051.01	0.81149	0.69867	0.68652	0.61018
1051.98	0.80863	0.69042	0.67677	0.60721
1052.94	0.80771	0.68219	0.6669	0.60701
1053.91	0.8089	0.67393	0.65697	0.60965
1054.87	0.8123	0.66556	0.64703	0.61509
1055.84	0.81792	0.65709	0.63718	0.62322
1056.8	0.82567	0.64863	0.62754	0.63375
1057.76	0.83526	0.64045	0.61828	0.64631
1058.73	0.84624	0.63289	0.60958	0.66042
1059.69	0.85795	0.6262	0.60156	0.67552
1060.66	0.86959	0.62041	0.59424	0.69102
1061.62	0.88034	0.6153	0.58743	0.70632
1062.59	0.88937	0.6104	0.5808	0.72082
1063.55	0.89599	0.60519	0.57397	0.73393
1064.51	0.89968	0.59925	0.56661	0.74507
1065.48	0.90012	0.5924	0.55854	0.7537
1066.44	0.89714	0.58472	0.54978	0.75929
1067.41	0.89077	0.57656	0.5406	0.76142
1068.37	0.88107	0.56843	0.53145	0.75972
1069.34	0.86821	0.56092	0.52297	0.754
1070.3	0.85241	0.55466	0.51589	0.7442
1071.26	0.83396	0.5502	0.51088	0.73047
1072.23	0.81335	0.54785	0.50832	0.7131
1073.19	0.79122	0.54756	0.5081	0.69255
1074.16	0.76847	0.54893	0.50968	0.66937
1075.12	0.74612	0.55123	0.51222	0.6442
1076.08	0.72531	0.55372	0.51492	0.61781
1077.05	0.70711	0.55585	0.51733	0.59126
1078.01	0.69242	0.55743	0.5194	0.56603
1078.98	0.6818	0.55864	0.52141	0.5441
1079.94	0.67527	0.55988	0.52361	0.52778
1080.91	0.67223	0.5615	0.5261	0.51926
1081.87	0.67153	0.56367	0.52871	0.52
1082.83	0.67176	0.56629	0.53119	0.5301
1083.8	0.67169	0.56911	0.53339	0.54822
1084.76	0.6707	0.57189	0.53537	0.57194
1085.73	0.66906	0.57455	0.53742	0.5984
1086.69	0.66794	0.57718	0.53998	0.62498
1087.66	0.66904	0.58007	0.54346	0.64969
1088.62	0.67406	0.58358	0.54819	0.67126
1089.58	0.68405	0.58802	0.55432	0.68904
1090.55	0.69895	0.59358	0.56177	0.70279
1091.51	0.71764	0.60023	0.57033	0.71243
1092.48	0.73825	0.60776	0.57964	0.71804
1093.44	0.75876	0.61582	0.58933	0.71977
1094.4	0.77745	0.62404	0.59903	0.71791
1095.37	0.79315	0.63211	0.60844	0.71288
1096.33	0.80534	0.63976	0.61727	0.70522
1097.3	0.81395	0.6468	0.62533	0.69555
1098.26	0.81923	0.65306	0.6325	0.68452
1099.23	0.82163	0.65843	0.6388	0.67278
1100.19	0.8216	0.66287	0.64431	0.66088
1101.15	0.81965	0.66644	0.64913	0.6493
1102.12	0.81623	0.6692	0.65328	0.63835
1103.08	0.81177	0.67122	0.65662	0.62816
1104.05	0.8066	0.67249	0.65894	0.61869
1105.01	0.80099	0.67294	0.6601	0.60976
1105.98	0.7951	0.67252	0.66012	0.60109
1106.94	0.78898	0.67128	0.65918	0.59231
1107.9	0.78262	0.66932	0.65753	0.58309
1108.87	0.77594	0.66678	0.6553	0.57311
1109.83	0.76882	0.66374	0.65245	0.56216
1110.8	0.76116	0.66019	0.64882	0.55013
1111.76	0.75288	0.65614	0.6443	0.53705
1112.73	0.74395	0.65168	0.63896	0.52307
1113.69	0.73444	0.64704	0.63315	0.5084
1114.65	0.72441	0.64256	0.62734	0.49336
1115.62	0.71404	0.63849	0.62193	0.47823
1116.58	0.70346	0.63489	0.61707	0.46334
1117.55	0.69287	0.63157	0.6126	0.44891
1118.51	0.6824	0.62817	0.60819	0.4351
1119.48	0.67217	0.62437	0.60348	0.42196
1120.44	0.66227	0.62005	0.59834	0.4094
1121.4	0.65271	0.6153	0.59281	0.39723
1122.37	0.64347	0.61032	0.58706	0.38513
1123.33	0.63448	0.60529	0.58118	0.37271
1124.3	0.62566	0.60028	0.57518	0.35958
1125.26	0.61692	0.59522	0.56892	0.34538
1126.22	0.60816	0.59006	0.56236	0.32986
1127.19	0.59931	0.5848	0.5556	0.31291
1128.15	0.59031	0.57959	0.54897	0.2946
1129.12	0.58115	0.5746	0.54282	0.27515
1130.08	0.57181	0.56993	0.53737	0.25491
1131.05	0.56233	0.56546	0.53245	0.23431
1132.01	0.55273	0.56089	0.5276	0.21382
1132.97	0.54304	0.55588	0.52226	0.19392
1133.94	0.53324	0.55022	0.51607	0.17508
1134.9	0.5233	0.544	0.50907	0.15774
1135.87	0.51314	0.53756	0.50166	0.1423
1136.83	0.50263	0.5313	0.4944	0.12912
1137.8	0.49159	0.52552	0.48769	0.11844
1138.76	0.4798	0.52026	0.48165	0.11043
1139.72	0.46704	0.51534	0.47606	0.10511
1140.69	0.45308	0.51047	0.47052	0.10243
1141.65	0.43776	0.50542	0.4647	0.10229
1142.62	0.42103	0.50004	0.45839	0.1046
1143.58	0.40294	0.49436	0.4516	0.10934
1144.55	0.38364	0.48845	0.44449	0.11656
1145.51	0.36343	0.48249	0.4373	0.12638
1146.47	0.34264	0.47666	0.43034	0.13889
1147.44	0.32173	0.47122	0.42392	0.15408
1148.4	0.30116	0.46645	0.4184	0.17173
1149.37	0.28146	0.46265	0.41407	0.1914
1150.33	0.26314	0.46001	0.41112	0.21243
1151.29	0.24672	0.45862	0.40959	0.23404
1152.26	0.23265	0.45842	0.40938	0.25539
1153.22	0.22131	0.45931	0.41033	0.27569
1154.19	0.21293	0.4611	0.41227	0.2942
1155.15	0.20761	0.46364	0.41513	0.31027
1156.12	0.20524	0.46678	0.41885	0.32339
1157.08	0.2055	0.47033	0.42331	0.33309
1158.04	0.20784	0.47412	0.42827	0.33905
1159.01	0.21155	0.47797	0.43339	0.34104
1159.97	0.21587	0.48183	0.43843	0.339
1160.94	0.22012	0.48577	0.44329	0.33302
1161.9	0.22375	0.48995	0.44817	0.32339
1162.87	0.22651	0.49454	0.4534	0.31055
1163.83	0.22837	0.49965	0.45933	0.29509
1164.79	0.22956	0.50524	0.46608	0.27767
1165.76	0.23044	0.51121	0.47358	0.25898
1166.72	0.23147	0.51745	0.4816	0.23977
1167.69	0.23308	0.52393	0.48992	0.22075
1168.65	0.23554	0.53068	0.4984	0.20262
1169.62	0.23897	0.53771	0.50697	0.18602
1170.58	0.24323	0.54495	0.5156	0.17148
1171.54	0.248	0.5522	0.52421	0.15941
1172.51	0.25283	0.55922	0.53269	0.15004
1173.47	0.25722	0.56579	0.54093	0.14348
1174.44	0.26073	0.57188	0.54891	0.13971
1175.4	0.26306	0.57762	0.55672	0.13872
1176.36	0.26399	0.58325	0.56453	0.14046
1177.33	0.26346	0.58903	0.57254	0.14494
1178.29	0.26147	0.59515	0.58089	0.1521
1179.26	0.2581	0.60167	0.58965	0.16181
1180.22	0.25349	0.60853	0.59878	0.17373
1181.19	0.24779	0.61563	0.6082	0.18734
1182.15	0.24121	0.62283	0.61777	0.20193
1183.11	0.23395	0.63001	0.62738	0.21671
1184.08	0.22617	0.63709	0.63692	0.23087
1185.04	0.21805	0.64401	0.64629	0.24366
1186.01	0.20972	0.6507	0.65536	0.25441
1186.97	0.2014	0.65709	0.66401	0.26262
1187.94	0.19335	0.66311	0.67211	0.26794
1188.9	0.18594	0.66866	0.67956	0.27026
1189.86	0.17961	0.67363	0.68624	0.26967
1190.83	0.17475	0.67791	0.69209	0.26656
1191.79	0.17163	0.68144	0.69709	0.26149
1192.76	0.17032	0.68422	0.70129	0.25524
1193.72	0.17061	0.68632	0.70482	0.24868
1194.69	0.17214	0.6879	0.70781	0.24278
1195.65	0.17444	0.68909	0.71039	0.2384
1196.61	0.17707	0.68997	0.71258	0.23629
1197.58	0.17966	0.6905	0.71432	0.23694
1198.54	0.18187	0.69062	0.71553	0.24043
1199.51	0.18277	0.68968	0.7158	0.24573
1200.47	0.18344	0.68887	0.71588	0.2535
1201.43	0.18286	0.68769	0.71554	0.26187
1202.4	0.18082	0.68628	0.71493	0.2697
1203.36	0.17721	0.68477	0.71418	0.27608
1204.33	0.17207	0.68321	0.71333	0.28062
1205.29	0.16556	0.68158	0.71234	0.28345
1206.26	0.15791	0.67983	0.71116	0.28505
1207.22	0.14935	0.67791	0.70975	0.28581
1208.18	0.14007	0.6758	0.70808	0.28575
1209.15	0.13023	0.6735	0.70614	0.2844
1210.11	0.11999	0.671	0.70394	0.28108
1211.08	0.10955	0.66831	0.70144	0.27527
1212.04	0.09921	0.6654	0.69862	0.26705
1213.01	0.0893	0.66231	0.69549	0.25717
1213.97	0.08019	0.65905	0.69209	0.247
1214.93	0.07222	0.65566	0.68846	0.23814
1215.9	0.06564	0.65216	0.68461	0.23205
1216.86	0.06055	0.64855	0.68052	0.22967
1217.83	0.05694	0.64482	0.67611	0.23124
1218.79	0.05467	0.64097	0.67136	0.23637
1219.76	0.05359	0.63699	0.66626	0.24424
1220.72	0.05354	0.63284	0.66086	0.25384
1221.68	0.05442	0.62845	0.65521	0.26422
1222.65	0.05614	0.62375	0.64931	0.27459
1223.61	0.05866	0.61868	0.6431	0.28436
1224.58	0.06188	0.61325	0.63649	0.2931
1225.54	0.06568	0.60753	0.62941	0.30047
1226.51	0.06992	0.60164	0.62189	0.30622
1227.47	0.07448	0.5957	0.61401	0.31017
1228.43	0.07924	0.58978	0.60593	0.31221
1229.4	0.08413	0.58387	0.59779	0.31228
1230.36	0.0891	0.57797	0.58969	0.31043
1231.33	0.09408	0.57209	0.58172	0.30677
1232.29	0.09895	0.56626	0.57393	0.30146
1233.25	0.10358	0.56059	0.56642	0.29476
1234.22	0.10781	0.55524	0.55933	0.28696
1235.18	0.1115	0.55034	0.55283	0.27841
1236.15	0.1146	0.54607	0.54707	0.26951
1237.11	0.11711	0.54253	0.54217	0.26073
1238.08	0.1191	0.53979	0.53821	0.25256
1239.04	0.12068	0.53787	0.5352	0.24555
1240	0.12201	0.53672	0.53313	0.24021
1240.97	0.12319	0.5362	0.53192	0.23703
1241.93	0.12431	0.53605	0.53131	0.23643
1242.9	0.12541	0.53589	0.53081	0.2387
1243.86	0.12648	0.53522	0.52974	0.24398
1244.83	0.1275	0.53358	0.52735	0.25224
1245.79	0.12841	0.53067	0.52319	0.26333
1246.75	0.12916	0.52654	0.51729	0.27694
1247.72	0.12977	0.52163	0.51034	0.29267
1248.68	0.13026	0.51678	0.50352	0.3101
1249.65	0.13076	0.51297	0.49819	0.32875
1250.61	0.13145	0.51111	0.49545	0.3482
1251.58	0.13258	0.51173	0.49587	0.36809
1252.54	0.13446	0.51488	0.49931	0.38815
1253.5	0.13739	0.52012	0.50509	0.40819
1254.47	0.14163	0.52668	0.51224	0.42809
1255.43	0.14737	0.53376	0.51982	0.44781
1256.4	0.15467	0.54064	0.52709	0.46739
1257.36	0.16347	0.54683	0.53358	0.48688
1258.32	0.17352	0.55204	0.53905	0.50634
1259.29	0.18439	0.55621	0.54348	0.52569
1260.25	0.1955	0.55951	0.54709	0.54479
1261.22	0.20619	0.56233	0.55033	0.56335
1262.18	0.21587	0.56525	0.55378	0.58107
1263.15	0.22406	0.56885	0.55804	0.59769
1264.11	0.23054	0.57358	0.5635	0.613
1265.07	0.23532	0.57962	0.57032	0.62692
1266.04	0.23864	0.58692	0.57839	0.6394
1267	0.24092	0.59524	0.58751	0.65053
1267.97	0.24269	0.6043	0.59743	0.66044
1268.93	0.24458	0.61379	0.60796	0.66931
1269.9	0.24717	0.62342	0.61891	0.67737
1270.86	0.25101	0.63294	0.63006	0.68476
1271.82	0.2565	0.64213	0.64113	0.69157
1272.79	0.26386	0.65084	0.65185	0.69777
1273.75	0.27314	0.65906	0.66204	0.70322
1274.72	0.28418	0.66682	0.67162	0.70766
1275.68	0.29667	0.67417	0.6806	0.71072
1276.65	0.31018	0.68112	0.68898	0.71198
1277.61	0.32413	0.68761	0.69672	0.71098
1278.57	0.33796	0.69359	0.70379	0.70733
1279.54	0.35107	0.69901	0.71012	0.7008
1280.5	0.36297	0.70386	0.71573	0.69141
1281.47	0.37329	0.70818	0.7207	0.6794
1282.43	0.38179	0.71202	0.72516	0.66523
1283.39	0.3884	0.71546	0.72922	0.6494
1284.36	0.39319	0.71858	0.73299	0.63245
1285.32	0.39632	0.72145	0.7365	0.61483
1286.29	0.39804	0.7241	0.73973	0.59703
1287.25	0.39862	0.72651	0.74264	0.57963
1288.22	0.39834	0.72862	0.7452	0.56345
1289.18	0.39742	0.73035	0.74737	0.54956
1290.14	0.39606	0.73173	0.7492	0.53912
1291.11	0.39432	0.73286	0.75074	0.53315
1292.07	0.39214	0.73389	0.75208	0.53219
1293.04	0.38936	0.73493	0.75328	0.53609
1294	0.38569	0.736	0.75436	0.54398
1294.97	0.38086	0.737	0.75533	0.5544
1295.93	0.3746	0.73782	0.75619	0.56561
1296.89	0.36675	0.73839	0.75696	0.57593
1297.86	0.3573	0.73872	0.75765	0.58411
1298.82	0.34638	0.73894	0.75826	0.58939
1299.79	0.33427	0.73916	0.75881	0.59155
1300.75	0.32136	0.73948	0.75927	0.5907
1301.72	0.30811	0.73992	0.75965	0.58726
1302.68	0.29503	0.74045	0.75994	0.58184
1303.64	0.28261	0.74102	0.76017	0.57525
1304.61	0.27128	0.74157	0.76037	0.56847
1305.57	0.26139	0.74205	0.76058	0.56258
1306.54	0.2532	0.74245	0.76081	0.5586
1307.5	0.24684	0.74275	0.76103	0.55721
1308.46	0.24233	0.743	0.76119	0.55867
1309.43	0.23963	0.74321	0.76118	0.56266
1310.39	0.23866	0.74334	0.76091	0.56846
1311.36	0.23935	0.74334	0.76029	0.57499
1312.32	0.24159	0.74314	0.75935	0.58109
1313.29	0.24526	0.74276	0.75817	0.58568
1314.25	0.25022	0.74232	0.75693	0.58805
1315.21	0.25635	0.74192	0.75572	0.58797
1316.18	0.26363	0.74155	0.75455	0.58574
1317.14	0.27202	0.74101	0.75329	0.58214
1318.11	0.2815	0.73994	0.75176	0.57829
1319.07	0.29189	0.73809	0.74982	0.57538
1320.04	0.30285	0.73544	0.74747	0.57444
1321	0.31393	0.73225	0.74481	0.576
1321.96	0.32468	0.72891	0.74198	0.58002
1322.93	0.33465	0.72571	0.73905	0.58598
1323.89	0.34345	0.72274	0.73602	0.59303
1324.86	0.35072	0.7199	0.73283	0.60018
1325.82	0.35618	0.71703	0.72942	0.60637
1326.79	0.3596	0.71402	0.72576	0.61065
1327.75	0.36089	0.71082	0.72187	0.61227
1328.71	0.36007	0.70751	0.71781	0.61076
1329.68	0.35729	0.70417	0.7137	0.60597
1330.64	0.3528	0.70096	0.70974	0.598
1331.61	0.34696	0.69806	0.70613	0.58725
1332.57	0.34021	0.69567	0.70306	0.57429
1333.53	0.33305	0.69401	0.70062	0.55986
1334.5	0.32601	0.69323	0.69875	0.54475
1335.46	0.31964	0.69331	0.69727	0.52973
1336.43	0.31454	0.69396	0.69589	0.51562
1337.39	0.31133	0.69452	0.69427	0.50328
1338.36	0.31053	0.69406	0.69207	0.49349
1339.32	0.31234	0.69197	0.68926	0.48674
1340.28	0.31651	0.68847	0.68613	0.48295
1341.25	0.3224	0.68448	0.68314	0.48145
1342.21	0.32921	0.68089	0.68052	0.48126
1343.18	0.33631	0.6781	0.67823	0.48139
1344.14	0.34328	0.67599	0.67608	0.48108
1345.11	0.34989	0.67428	0.67388	0.47979
1346.07	0.35606	0.67271	0.6716	0.4772
1347.03	0.36171	0.67111	0.66924	0.47312
1348	0.36674	0.66945	0.66687	0.4675
1348.96	0.3711	0.6677	0.66442	0.46036
1349.93	0.37469	0.6658	0.66176	0.45185
1350.89	0.37748	0.66361	0.6587	0.44215
1351.86	0.37945	0.66099	0.65512	0.43158
1352.82	0.38062	0.65784	0.65098	0.42053
1353.78	0.38109	0.65419	0.64634	0.40956
1354.75	0.38095	0.65021	0.64136	0.39937
1355.71	0.38028	0.64623	0.63631	0.39065
1356.68	0.3791	0.64264	0.63149	0.38392
1357.64	0.37739	0.63971	0.62708	0.37947
1358.61	0.37522	0.63745	0.62305	0.37747
1359.57	0.37283	0.63553	0.61905	0.37815
1360.53	0.3707	0.63324	0.61454	0.38193
1361.5	0.36934	0.6297	0.60893	0.38909
1362.46	0.36906	0.62435	0.60205	0.39939
1363.43	0.36978	0.6175	0.5943	0.41192
1364.39	0.37112	0.60989	0.58611	0.42564
1365.35	0.37259	0.6019	0.5774	0.4399
1366.32	0.37372	0.59332	0.56769	0.45452
1367.28	0.37416	0.58378	0.55651	0.46941
1368.25	0.37363	0.5732	0.54388	0.48431
1369.21	0.37189	0.562	0.53039	0.49869
1370.18	0.36872	0.55079	0.5168	0.51198
1371.14	0.36391	0.53997	0.50356	0.5238
1372.1	0.35729	0.5295	0.49062	0.5341
1373.07	0.34888	0.51901	0.47767	0.54287
1374.03	0.33895	0.50817	0.4646	0.54999
1375	0.32794	0.497	0.45167	0.55501
1375.96	0.31623	0.48578	0.43922	0.55735
1376.93	0.3039	0.47477	0.42736	0.55652
1377.89	0.2908	0.46413	0.41603	0.55212
1378.85	0.27685	0.45425	0.40552	0.54379
1379.82	0.26232	0.44593	0.39662	0.53137
1380.78	0.24791	0.44013	0.39033	0.51504
1381.75	0.23462	0.43734	0.3872	0.49545
1382.71	0.2234	0.43737	0.38698	0.47343
1383.67	0.21498	0.43956	0.38894	0.44978
1384.64	0.2098	0.44319	0.39232	0.42521
1385.6	0.20819	0.44759	0.39656	0.40072
1386.57	0.21007	0.45191	0.40102	0.37799
1387.53	0.2147	0.45515	0.40487	0.35898
1388.5	0.22079	0.45682	0.40747	0.34485
1389.46	0.22713	0.45719	0.40877	0.33537
1390.42	0.23305	0.45708	0.40941	0.32962
1391.39	0.23836	0.45756	0.4104	0.32692
1392.35	0.24311	0.45984	0.41297	0.32723
1393.32	0.24739	0.46504	0.41836	0.33099
1394.28	0.25116	0.47377	0.42741	0.33897
1395.25	0.25427	0.48566	0.44015	0.3521
1396.21	0.25663	0.49958	0.45581	0.37101
1397.17	0.25827	0.51439	0.47335	0.39549
1398.14	0.25927	0.52932	0.49179	0.42402
1399.1	0.2596	0.54391	0.51022	0.45399
1400.07	0.259	0.55787	0.52789	0.48259
1401.03	0.25714	0.57117	0.54456	0.50767
1402	0.2537	0.58414	0.56055	0.52817
1402.96	0.24852	0.59729	0.57653	0.54391
1403.92	0.24171	0.61087	0.5929	0.55511
1404.89	0.23371	0.62443	0.60921	0.56198
1405.85	0.22525	0.63698	0.62429	0.56463
1406.82	0.21718	0.64773	0.63715	0.5633
1407.78	0.21021	0.65671	0.64779	0.55852
1408.75	0.20485	0.66465	0.65714	0.55095
1409.71	0.2015	0.67235	0.66631	0.5412
1410.67	0.2005	0.68027	0.67588	0.52983
1411.64	0.20196	0.68827	0.68563	0.51751
1412.6	0.20554	0.69586	0.69484	0.50484
1413.57	0.21056	0.70268	0.70288	0.4922
1414.53	0.21623	0.70875	0.70973	0.47948
1415.49	0.22187	0.7145	0.71589	0.46624
1416.46	0.22702	0.72046	0.72205	0.45203
1417.42	0.23136	0.72663	0.72853	0.43681
1418.39	0.23454	0.73222	0.73483	0.42125
1419.35	0.23623	0.73643	0.74002	0.40641
1420.32	0.23615	0.7395	0.74384	0.39294
1421.28	0.23418	0.74208	0.74665	0.38069
1422.24	0.23038	0.74429	0.74884	0.36923
1423.21	0.22502	0.7459	0.75055	0.35842
1424.17	0.21861	0.7467	0.75183	0.3485
1425.14	0.2117	0.74685	0.75274	0.33991
1426.1	0.20468	0.74674	0.75343	0.33303
1427.07	0.19764	0.74677	0.75403	0.32808
1428.03	0.19041	0.7471	0.7546	0.32526
1428.99	0.1828	0.74763	0.75509	0.32477
1429.96	0.17484	0.74799	0.75535	0.32667
1430.92	0.16684	0.74787	0.75522	0.33071
1431.89	0.15908	0.74713	0.75455	0.33635
1432.85	0.15157	0.74576	0.75325	0.34324
1433.82	0.14425	0.74379	0.75121	0.35157
1434.78	0.13726	0.74124	0.74842	0.36208
1435.74	0.13122	0.73811	0.74506	0.37535
1436.71	0.12702	0.73458	0.74168	0.39081
1437.67	0.12536	0.73137	0.739	0.40679
1438.64	0.12646	0.72917	0.73733	0.42198
1439.6	0.13021	0.72795	0.73639	0.43615
1440.56	0.13633	0.72718	0.73564	0.44968
1441.53	0.14442	0.72647	0.73475	0.46294
1442.49	0.15402	0.72577	0.73362	0.47608
1443.46	0.16464	0.72519	0.73229	0.4891
1444.42	0.17587	0.72481	0.73077	0.50206
1445.39	0.18745	0.72447	0.72903	0.51514
1446.35	0.19927	0.72394	0.72708	0.5287
1447.31	0.2112	0.72306	0.72502	0.54301
1448.28	0.22299	0.72199	0.72313	0.55794
1449.24	0.23418	0.72111	0.72163	0.57295
1450.21	0.24432	0.72065	0.72046	0.58736
1451.17	0.25314	0.72043	0.71932	0.60069
1452.14	0.26066	0.72006	0.71784	0.61277
1453.1	0.26741	0.71937	0.71582	0.62375
1454.06	0.2746	0.71876	0.7133	0.63431
1455.03	0.28451	0.71876	0.71019	0.6459
1455.99	0.30023	0.71817	0.70539	0.66078
1456.96	0.32356	0.71301	0.69703	0.68008
1457.92	0.35163	0.70254	0.68618	0.70122
1458.89	0.37933	0.69224	0.67677	0.72032
1459.85	0.40404	0.68558	0.67053	0.73596
1460.81	0.4255	0.68228	0.66721	0.74855
1461.78	0.44453	0.68196	0.66708	0.759
1462.74	0.46266	0.68548	0.6715	0.76844
1463.71	0.48154	0.69393	0.6818	0.77793
1464.67	0.50168	0.70635	0.69681	0.78788
1465.63	0.52176	0.71887	0.71189	0.79761
1466.6	0.53984	0.72758	0.72224	0.80607
1467.56	0.55504	0.73115	0.72621	0.81268
1468.53	0.56778	0.73025	0.72462	0.81751
1469.49	0.57932	0.72627	0.71892	0.8211
1470.46	0.59145	0.72098	0.71068	0.82433
1471.42	0.60613	0.71661	0.70226	0.82833
1472.38	0.62442	0.7154	0.69746	0.83398
1473.35	0.64536	0.71846	0.69974	0.84129
1474.31	0.66664	0.72494	0.70861	0.84943
1475.28	0.68651	0.73303	0.72027	0.85755
1476.24	0.70422	0.74122	0.73148	0.86515
1477.21	0.71954	0.74856	0.74081	0.87196
1478.17	0.73249	0.7546	0.74795	0.87789
1479.13	0.74333	0.7592	0.75307	0.88298
1480.1	0.75247	0.76252	0.7566	0.88736
1481.06	0.7603	0.76493	0.75911	0.89113
1482.03	0.76703	0.76691	0.76114	0.89434
1482.99	0.77272	0.7689	0.76312	0.89693
1483.96	0.77733	0.77123	0.76521	0.89884
1484.92	0.78097	0.77413	0.76748	0.90011
1485.88	0.78413	0.7779	0.77001	0.90099
1486.85	0.78784	0.78271	0.77299	0.90211
1487.81	0.79347	0.78801	0.77642	0.90431
1488.78	0.8019	0.79196	0.77982	0.90823
1489.74	0.81274	0.79319	0.7826	0.91371
1490.7	0.82449	0.7928	0.78485	0.91988
1491.67	0.83551	0.79273	0.78707	0.9258
1492.63	0.84451	0.79371	0.7895	0.9308
1493.6	0.85089	0.7956	0.79215	0.93452
1494.56	0.85491	0.79834	0.79514	0.93702
1495.53	0.85763	0.80208	0.79865	0.93875
1496.49	0.8604	0.80652	0.80267	0.94032
1497.45	0.86411	0.81062	0.80671	0.94211
1498.42	0.86866	0.81367	0.81027	0.94402
1499.38	0.87332	0.81601	0.81334	0.94564
1500.35	0.87719	0.81803	0.81604	0.94655
1501.31	0.8796	0.81935	0.81823	0.9465
1502.28	0.88023	0.81946	0.81969	0.94546
1503.24	0.87945	0.81857	0.8205	0.94369
1504.2	0.87844	0.81833	0.82131	0.94175
1505.17	0.87922	0.82183	0.82335	0.94059
1506.13	0.88403	0.8307	0.82729	0.9412
1507.1	0.89316	0.83923	0.83096	0.94394
1508.06	0.90405	0.84006	0.83188	0.94804
1509.03	0.91391	0.83652	0.83157	0.95219
1509.99	0.92112	0.83351	0.83167	0.95533
1510.95	0.92501	0.83159	0.83208	0.95694
1511.92	0.92578	0.83012	0.83234	0.95704
1512.88	0.92423	0.82899	0.8323	0.95606
1513.85	0.9214	0.82853	0.83205	0.95454
1514.81	0.91818	0.82901	0.83172	0.953
1515.78	0.91515	0.83009	0.83139	0.95176
1516.74	0.91256	0.83102	0.83104	0.9509
1517.7	0.91061	0.83123	0.83077	0.95045
1518.67	0.90973	0.83086	0.83077	0.95058
1519.63	0.91059	0.83051	0.8312	0.95163
1520.6	0.91373	0.83064	0.83192	0.95393
1521.56	0.9191	0.83113	0.83252	0.95751
1522.52	0.92565	0.83159	0.83265	0.96176
1523.49	0.93181	0.83169	0.83231	0.96567
1524.45	0.93622	0.83135	0.83169	0.96827
1525.42	0.93839	0.83057	0.83106	0.96911
1526.38	0.93862	0.82951	0.83059	0.96834
1527.35	0.93745	0.82841	0.83041	0.96636
1528.31	0.93527	0.8275	0.83059	0.96358
1529.27	0.93233	0.82695	0.83115	0.9603
1530.24	0.92895	0.82708	0.83216	0.95672
1531.2	0.9257	0.8284	0.83373	0.95314
1532.17	0.92334	0.83105	0.83568	0.94983
1533.13	0.9224	0.83411	0.8373	0.9471
1534.1	0.92285	0.83596	0.83775	0.9451
1535.06	0.9243	0.83559	0.83679	0.94386
1536.02	0.92639	0.8332	0.83485	0.94345
1536.99	0.92915	0.83019	0.83279	0.9441
1537.95	0.93297	0.82942	0.83198	0.94616
1538.92	0.9381	0.83511	0.83435	0.94974
1539.88	0.94369	0.84861	0.84041	0.95415
1540.85	0.94732	0.86076	0.84582	0.95773
1541.81	0.94707	0.86093	0.84573	0.95903
1542.77	0.94378	0.85312	0.84215	0.95806
1543.74	0.9393	0.84483	0.83859	0.95574
1544.7	0.93476	0.83862	0.83615	0.9529
1545.67	0.93061	0.83458	0.83478	0.95002
1546.63	0.927	0.83237	0.83422	0.94734
1547.59	0.92397	0.83152	0.83419	0.94497
1548.56	0.92151	0.83153	0.8344	0.94299
1549.52	0.91967	0.8319	0.83455	0.94147
1550.49	0.91857	0.83228	0.83437	0.94045
1551.45	0.91831	0.83237	0.83364	0.93999
1552.42	0.91889	0.83192	0.83223	0.94007
1553.38	0.92003	0.83067	0.83014	0.94066
1554.34	0.92115	0.82849	0.82747	0.94156
1555.31	0.92145	0.82584	0.82464	0.94228
1556.27	0.92001	0.82418	0.82271	0.94196
1557.24	0.91623	0.82494	0.82302	0.93951
1558.2	0.91023	0.82606	0.82522	0.93427
1559.17	0.90319	0.82427	0.8266	0.92698
1560.13	0.89703	0.82257	0.82677	0.91953
1561.09	0.89266	0.82357	0.82691	0.91315
1562.06	0.8897	0.82562	0.82691	0.90806
1563.02	0.88752	0.82657	0.82624	0.90413
1563.99	0.88573	0.8256	0.82473	0.90119
1564.95	0.88426	0.82314	0.82268	0.89913
1565.92	0.88315	0.82025	0.82064	0.89789
1566.88	0.88249	0.81808	0.81921	0.89743
1567.84	0.88223	0.81712	0.8186	0.89762
1568.81	0.88214	0.81682	0.81842	0.89821
1569.77	0.8819	0.81631	0.81803	0.89886
1570.74	0.88112	0.81524	0.81707	0.89921
1571.7	0.8792	0.81369	0.81557	0.89888
1572.66	0.87552	0.81181	0.81368	0.89747
1573.63	0.86971	0.80991	0.81161	0.89473
1574.59	0.86199	0.80835	0.80964	0.89066
1575.56	0.85306	0.80688	0.8078	0.88557
1576.52	0.84402	0.8046	0.80585	0.88006
1577.49	0.83596	0.80143	0.80371	0.8748
1578.45	0.82945	0.79817	0.80154	0.87025
1579.41	0.82425	0.79505	0.79928	0.86656
1580.38	0.81982	0.79168	0.79668	0.86367
1581.34	0.81562	0.78789	0.79361	0.86142
1582.31	0.81134	0.78394	0.79022	0.85964
1583.27	0.80677	0.78029	0.7868	0.85815
1584.24	0.80176	0.77722	0.78363	0.85676
1585.2	0.79602	0.77467	0.78084	0.85525
1586.16	0.78919	0.77238	0.77836	0.85333
1587.13	0.78088	0.77004	0.77603	0.85073
1588.09	0.77094	0.76749	0.77367	0.84728
1589.06	0.75945	0.76467	0.77113	0.84293
1590.02	0.74678	0.76163	0.76835	0.83777
1590.99	0.73339	0.75843	0.76532	0.83205
1591.95	0.71976	0.75511	0.76205	0.82609
1592.91	0.70632	0.75163	0.75853	0.82024
1593.88	0.69341	0.74785	0.75474	0.81482
1594.84	0.6813	0.74359	0.75064	0.81012
1595.81	0.67012	0.7388	0.74623	0.80628
1596.77	0.65979	0.73362	0.74161	0.80331
1597.73	0.65002	0.72834	0.7369	0.8011
1598.7	0.64037	0.72327	0.73224	0.7994
1599.66	0.63029	0.71856	0.72772	0.79788
1600.63	0.61926	0.71414	0.72334	0.79613
1601.59	0.60693	0.70983	0.71904	0.79375
1602.56	0.59318	0.70541	0.71473	0.79041
1603.52	0.57815	0.70083	0.71032	0.7859
1604.48	0.5622	0.69618	0.7058	0.78021
1605.45	0.54573	0.69154	0.70115	0.77351
1606.41	0.52907	0.68683	0.69632	0.76607
1607.38	0.51241	0.68174	0.69116	0.75819
1608.34	0.49595	0.67596	0.68559	0.7502
1609.31	0.48008	0.66951	0.6797	0.74247
1610.27	0.46539	0.66281	0.67381	0.73544
1611.23	0.45234	0.65632	0.66827	0.72952
1612.2	0.44094	0.65028	0.6632	0.72491
1613.16	0.4307	0.64473	0.65856	0.72151
1614.13	0.42077	0.63978	0.65421	0.71884
1615.09	0.41026	0.63537	0.6498	0.71615
1616.06	0.39884	0.63096	0.64488	0.71276
1617.02	0.38727	0.62629	0.63954	0.70846
1617.98	0.37676	0.62193	0.63455	0.70346
1618.95	0.36779	0.61833	0.63041	0.69782
1619.91	0.3602	0.61512	0.62689	0.69148
1620.88	0.35377	0.61169	0.62354	0.68452
1621.84	0.34837	0.60776	0.62003	0.67717
1622.8	0.34403	0.60344	0.61629	0.66983
1623.77	0.34087	0.59906	0.61246	0.66298
1624.73	0.33902	0.595	0.60879	0.65705
1625.7	0.33847	0.59145	0.60544	0.65222
1626.66	0.33902	0.58831	0.6024	0.6484
1627.63	0.34045	0.58542	0.59956	0.64537
1628.59	0.34253	0.58265	0.5969	0.64301
1629.55	0.34502	0.57988	0.59439	0.64131
1630.52	0.34776	0.57689	0.59196	0.64025
1631.48	0.35069	0.57359	0.58961	0.63959
1632.45	0.35385	0.57051	0.5877	0.63874
1633.41	0.35738	0.5692	0.58713	0.63676
1634.38	0.36137	0.57145	0.58892	0.63257
1635.34	0.36567	0.57686	0.5928	0.62556
1636.3	0.36957	0.58184	0.59633	0.6162
1637.27	0.37243	0.58407	0.59778	0.60584
1638.23	0.37443	0.58463	0.59777	0.59558
1639.2	0.3762	0.58482	0.59742	0.58612
1640.16	0.37822	0.5849	0.59717	0.5779
1641.13	0.38074	0.58467	0.59703	0.57126
1642.09	0.38387	0.58403	0.59695	0.5664
1643.05	0.38766	0.58353	0.5972	0.56324
1644.02	0.39212	0.58462	0.59863	0.56127
1644.98	0.3971	0.58915	0.60239	0.55952
1645.95	0.40215	0.59714	0.6086	0.55692
1646.91	0.40661	0.60514	0.615	0.55325
1647.88	0.41007	0.60932	0.6188	0.54918
1648.84	0.41229	0.60893	0.61943	0.54471
1649.8	0.41281	0.6054	0.61803	0.53872
1650.77	0.41086	0.60126	0.61654	0.52973
1651.73	0.40586	0.60027	0.61761	0.51684
1652.7	0.39785	0.60502	0.62318	0.50038
1653.66	0.38778	0.61272	0.63093	0.48282
1654.62	0.37759	0.61953	0.63686	0.46769
1655.59	0.3688	0.62544	0.64064	0.45632
1656.55	0.36184	0.63051	0.64326	0.4481
1657.52	0.35652	0.63417	0.6452	0.4422
1658.48	0.35241	0.63645	0.64687	0.43789
1659.45	0.34892	0.63829	0.64889	0.43445
1660.41	0.34529	0.64092	0.65201	0.43104
1661.37	0.3408	0.64497	0.65652	0.42683
1662.34	0.33511	0.64971	0.66172	0.42132
1663.3	0.3285	0.65391	0.66638	0.4146
1664.27	0.32132	0.65698	0.66983	0.40687
1665.23	0.31342	0.65916	0.67224	0.39796
1666.2	0.30418	0.66117	0.6743	0.38731
1667.16	0.29287	0.66412	0.67692	0.37423
1668.12	0.27907	0.66888	0.68085	0.35848
1669.09	0.26333	0.67492	0.6859	0.34084
1670.05	0.24733	0.68012	0.6907	0.3233
1671.02	0.23302	0.68288	0.69398	0.30792
1671.98	0.22118	0.68344	0.69571	0.29547
1672.95	0.21127	0.68297	0.69673	0.28528
1673.91	0.2022	0.68265	0.69794	0.27613
1674.87	0.19302	0.68344	0.69998	0.26696
1675.84	0.18351	0.68584	0.703	0.2574
1676.8	0.174	0.68963	0.70664	0.24766
1677.77	0.16478	0.69384	0.71024	0.2379
1678.73	0.15562	0.69723	0.71321	0.22782
1679.69	0.14587	0.69897	0.71527	0.21668
1680.66	0.13472	0.6991	0.71657	0.20353
1681.62	0.12147	0.69868	0.71775	0.18739
1682.59	0.10588	0.69892	0.71953	0.16775
1683.55	0.08906	0.69982	0.72191	0.1457
1684.52	0.07363	0.70074	0.72424	0.12454
1685.48	0.06185	0.70233	0.7264	0.10742
1686.44	0.05403	0.70505	0.72864	0.095
1687.41	0.04922	0.70806	0.73083	0.08619
1688.37	0.04623	0.7102	0.73266	0.07965
1689.34	0.0441	0.71089	0.7339	0.07441
1690.3	0.04223	0.7101	0.73453	0.06993
1691.27	0.04038	0.70821	0.73465	0.06588
1692.23	0.03843	0.70581	0.73447	0.06193
1693.19	0.03621	0.70368	0.73433	0.05761
1694.16	0.0335	0.70262	0.73461	0.05228
1695.12	0.03006	0.70308	0.73547	0.04543
1696.09	0.02583	0.70448	0.73666	0.03689
1697.05	0.02102	0.70515	0.73748	0.02709
1698.02	0.01584	0.7035	0.73743	0.01702
1698.98	0.01041	0.69992	0.73688	0.00813
1699.94	0.00492	0.69691	0.73687	0.00209
1700.91	0	0.69662	0.73803	0
1701.87	0.00262	0.6991	0.74007	0.00158
1702.84	0.00571	0.70274	0.74223	0.00547
1703.8	0.00794	0.70577	0.74383	0.01025
1704.76	0.00944	0.70706	0.74458	0.01504
1705.73	0.01032	0.70654	0.74458	0.01935
1706.69	0.01069	0.70496	0.7442	0.0229
1707.66	0.01068	0.70343	0.74385	0.02563
1708.62	0.01042	0.70261	0.74377	0.02763
1709.59	0.00994	0.70252	0.74396	0.02918
1710.55	0.00921	0.7028	0.74433	0.03065
1711.51	0.00817	0.70313	0.74481	0.03248
1712.48	0.00677	0.7035	0.74541	0.0352
1713.44	0.00497	0.7042	0.74625	0.03964
1714.41	0.00281	0.70565	0.74752	0.04701
1715.37	0.0003008	0.70758	0.74916	0.05866
1716.34	0.000902751	0.70834	0.75052	0.07507
1717.3	0.004	0.7067	0.75095	0.09436
1718.26	0.00707	0.70449	0.75101	0.11286
1719.23	0.00974	0.70418	0.75167	0.12807
1720.19	0.0118	0.70594	0.75307	0.13976
1721.16	0.01325	0.70854	0.75484	0.14881
1722.12	0.01416	0.71089	0.75662	0.15616
1723.09	0.01461	0.71259	0.75829	0.16228
1724.05	0.01463	0.7138	0.75995	0.16718
1725.01	0.01425	0.71501	0.76175	0.17061
1725.98	0.01348	0.71678	0.76383	0.17238
1726.94	0.01237	0.71932	0.76621	0.17255
1727.91	0.01097	0.7224	0.7687	0.17143
1728.87	0.00941	0.72545	0.77099	0.16939
1729.83	0.00793	0.72797	0.77287	0.16655
1730.8	0.00703	0.73002	0.7745	0.16257
1731.76	0.00735	0.73229	0.77651	0.15657
1732.73	0.009	0.73565	0.77967	0.14759
1733.69	0.01145	0.74031	0.78412	0.13572
1734.66	0.01406	0.74601	0.78919	0.12254
1735.62	0.01636	0.75239	0.79415	0.10983
1736.58	0.01812	0.75881	0.79864	0.09829
1737.55	0.01934	0.76467	0.80266	0.08777
1738.51	0.02012	0.76997	0.80644	0.07783
1739.48	0.02055	0.77516	0.81027	0.06819
1740.44	0.0207	0.78073	0.8143	0.05904
1741.41	0.02059	0.78683	0.81846	0.05097
1742.37	0.02036	0.79327	0.82263	0.04451
1743.33	0.02022	0.79975	0.82676	0.03969
1744.3	0.02048	0.80595	0.83082	0.03621
1745.26	0.02147	0.81158	0.83469	0.03372
1746.23	0.02352	0.81645	0.83816	0.03207
1747.19	0.02682	0.8204	0.84107	0.03121
1748.16	0.0314	0.82325	0.84332	0.03105
1749.12	0.03704	0.82485	0.84504	0.03131
1750.08	0.04323	0.82565	0.84663	0.03169
1751.05	0.04921	0.82672	0.84855	0.0321
1752.01	0.05443	0.82888	0.85097	0.03273
1752.98	0.05884	0.83209	0.85371	0.03395
1753.94	0.06271	0.83589	0.85654	0.0361
1754.9	0.06644	0.83983	0.85931	0.03944
1755.87	0.07028	0.84365	0.86196	0.04409
1756.83	0.07437	0.84711	0.86441	0.05003
1757.8	0.07878	0.85003	0.86657	0.05719
1758.76	0.08372	0.85238	0.86842	0.06563
1759.73	0.08953	0.85435	0.87006	0.07557
1760.69	0.0965	0.85623	0.87169	0.08716
1761.65	0.10467	0.85825	0.87341	0.10014
1762.62	0.11373	0.86045	0.87524	0.1139
1763.58	0.12332	0.86271	0.87711	0.12781
1764.55	0.1332	0.86488	0.87892	0.14167
1765.51	0.14336	0.86686	0.88063	0.15557
1766.48	0.15378	0.86868	0.88225	0.1696
1767.44	0.16436	0.87057	0.88388	0.18367
1768.4	0.17487	0.87281	0.88562	0.19747
1769.37	0.18514	0.87555	0.8875	0.21067
1770.33	0.19519	0.87857	0.88946	0.22319
1771.3	0.20519	0.88116	0.89127	0.23512
1772.26	0.2151	0.88274	0.8927	0.24638
1773.23	0.22457	0.88367	0.89385	0.25656
1774.19	0.23345	0.88482	0.89502	0.26552
1775.15	0.24212	0.88653	0.89632	0.27372
1776.12	0.25128	0.88843	0.89764	0.28199
1777.08	0.26146	0.89008	0.89886	0.291
1778.05	0.2728	0.89132	0.89993	0.30095
1779.01	0.28496	0.89222	0.90086	0.31152
1779.97	0.29722	0.89285	0.9016	0.32204
1780.94	0.30882	0.89316	0.90209	0.33181
1781.9	0.31931	0.8932	0.90236	0.34044
1782.87	0.32867	0.89318	0.90259	0.34795
1783.83	0.33707	0.89346	0.90308	0.3545
1784.8	0.34461	0.89435	0.90404	0.36021
1785.76	0.35139	0.89584	0.90547	0.36516
1786.72	0.35764	0.89763	0.90714	0.36959
1787.69	0.36389	0.89922	0.90875	0.37398
1788.65	0.37081	0.9004	0.91011	0.37894
1789.62	0.37894	0.90137	0.91126	0.385
1790.58	0.38842	0.90256	0.91237	0.39233
1791.55	0.39872	0.90408	0.91348	0.40061
1792.51	0.4088	0.90563	0.91454	0.40899
1793.47	0.41773	0.90716	0.91557	0.41667
1794.44	0.42531	0.90885	0.91668	0.42336
1795.4	0.43197	0.91051	0.91781	0.4293
1796.37	0.4382	0.91167	0.91876	0.43482
1797.33	0.44421	0.91205	0.91935	0.44006
1798.3	0.4499	0.91174	0.91954	0.44495
1799.26	0.45497	0.91101	0.91938	0.44927
1800.22	0.45905	0.91013	0.91896	0.45278
1801.19	0.46199	0.90936	0.9185	0.45537
1802.15	0.46405	0.90892	0.91825	0.45719
1803.12	0.46576	0.90892	0.91839	0.45867
1804.08	0.4678	0.90929	0.9189	0.46034
1805.05	0.47072	0.90987	0.91963	0.46265
1806.01	0.47484	0.91055	0.92041	0.46589
1806.97	0.48022	0.91129	0.92109	0.47012
1807.94	0.48664	0.91205	0.92155	0.47518
1808.9	0.49364	0.9127	0.92173	0.48073
1809.87	0.5006	0.91301	0.9216	0.48626
1810.83	0.5069	0.91282	0.92126	0.49127
1811.79	0.51212	0.9122	0.92088	0.49539
1812.76	0.51621	0.91142	0.92063	0.49851
1813.72	0.51942	0.91071	0.92054	0.5008
1814.69	0.52209	0.91018	0.92057	0.50253
1815.65	0.52453	0.90987	0.92065	0.50397
1816.62	0.52687	0.9098	0.92074	0.5053
1817.58	0.52918	0.90997	0.92084	0.50663
1818.54	0.53157	0.91028	0.92098	0.50807
1819.51	0.53431	0.9106	0.92113	0.50987
1820.47	0.53778	0.91077	0.92125	0.51232
1821.44	0.54228	0.91075	0.92134	0.51571
1822.4	0.54784	0.91061	0.9214	0.52014
1823.37	0.55419	0.91051	0.92151	0.52544
1824.33	0.56086	0.91061	0.92173	0.53124
1825.29	0.56737	0.91098	0.92207	0.53712
1826.26	0.57338	0.91157	0.92247	0.5427
1827.22	0.57871	0.9122	0.92279	0.54775
1828.19	0.58311	0.91261	0.92291	0.55206
1829.15	0.58623	0.91254	0.92276	0.55536
1830.12	0.58776	0.91202	0.92243	0.55739
1831.08	0.58775	0.91151	0.92219	0.5581
1832.04	0.58685	0.91149	0.92225	0.55788
1833.01	0.58603	0.91196	0.92255	0.55744
1833.97	0.58615	0.91258	0.92291	0.55752
1834.94	0.5876	0.91306	0.92316	0.55849
1835.9	0.59026	0.91326	0.92324	0.56038
1836.86	0.59374	0.91324	0.92322	0.56295
1837.83	0.59779	0.91302	0.92315	0.56601
1838.79	0.6025	0.91257	0.92304	0.56957
1839.76	0.60822	0.91176	0.92285	0.57384
1840.72	0.61516	0.91059	0.92253	0.57893
1841.69	0.62302	0.90941	0.92218	0.58463
1842.65	0.63082	0.90872	0.92197	0.59028
1843.61	0.63715	0.90876	0.92197	0.59495
1844.58	0.64082	0.90939	0.92214	0.59781
1845.54	0.64159	0.91034	0.92242	0.59867
1846.51	0.64039	0.91139	0.92276	0.59808
1847.47	0.63861	0.91223	0.92303	0.59701
1848.44	0.6374	0.91252	0.92312	0.59631
1849.4	0.63732	0.91221	0.92298	0.59645
1850.36	0.63845	0.91152	0.92273	0.59753
1851.33	0.64056	0.91083	0.92251	0.59942
1852.29	0.6434	0.91038	0.92239	0.60193
1853.26	0.64679	0.91024	0.92235	0.60493
1854.22	0.65058	0.9103	0.92231	0.60827
1855.19	0.65461	0.91041	0.9222	0.61182
1856.15	0.65869	0.91047	0.92199	0.61541
1857.11	0.66258	0.91045	0.92175	0.61881
1858.08	0.66606	0.91034	0.92152	0.62187
1859.04	0.66895	0.91015	0.92138	0.62444
1860.01	0.67118	0.90995	0.92135	0.62646
1860.97	0.67276	0.90986	0.92146	0.62797
1861.93	0.67396	0.91001	0.9217	0.62912
1862.9	0.67523	0.91045	0.92206	0.63025
1863.86	0.67717	0.91112	0.92248	0.63178
1864.83	0.68027	0.91192	0.92291	0.63416
1865.79	0.68464	0.91275	0.92326	0.63758
1866.76	0.68981	0.91334	0.92338	0.64191
1867.72	0.69481	0.91319	0.92308	0.64662
1868.68	0.69858	0.91198	0.92226	0.651
1869.65	0.70057	0.91018	0.92123	0.65446
1870.61	0.7011	0.90871	0.92043	0.65695
1871.58	0.70099	0.90797	0.92004	0.65883
1872.54	0.70102	0.90773	0.9199	0.66054
1873.51	0.70157	0.90759	0.91982	0.66233
1874.47	0.70257	0.90734	0.91967	0.66418
1875.43	0.70368	0.90702	0.91943	0.6659
1876.4	0.70457	0.90672	0.91917	0.66729
1877.36	0.70511	0.90654	0.91896	0.66831
1878.33	0.70541	0.90646	0.91884	0.66906
1879.29	0.70574	0.90645	0.91878	0.66978
1880.26	0.70634	0.90644	0.91876	0.67071
1881.22	0.70735	0.90643	0.91874	0.67203
1882.18	0.70883	0.90641	0.91868	0.67381
1883.15	0.71085	0.90637	0.91858	0.67614
1884.11	0.7135	0.90629	0.91841	0.67908
1885.08	0.71688	0.90613	0.91817	0.68266
1886.04	0.72091	0.90588	0.91783	0.6868
1887	0.72522	0.90557	0.91741	0.69125
1887.97	0.7292	0.90525	0.91695	0.69558
1888.93	0.73219	0.90497	0.91651	0.69928
1889.9	0.73378	0.90478	0.91622	0.70199
1890.86	0.73406	0.90476	0.91615	0.70365
1891.83	0.73353	0.90493	0.91629	0.70452
1892.79	0.73279	0.90517	0.91651	0.70504
1893.75	0.73228	0.90534	0.91669	0.70556
1894.72	0.73212	0.9053	0.91671	0.70628
1895.68	0.73225	0.90501	0.91657	0.70722
1896.65	0.73263	0.90456	0.91635	0.70837
1897.61	0.73331	0.9041	0.91613	0.70976
1898.58	0.7345	0.90376	0.91597	0.71153
1899.54	0.73632	0.90357	0.91586	0.71377
1900.5	0.73875	0.90346	0.91575	0.71645
1901.47	0.74156	0.90336	0.91561	0.71943
1902.43	0.74445	0.90325	0.91545	0.72243
1903.4	0.74719	0.90317	0.91533	0.72525
1904.36	0.74965	0.90321	0.91533	0.72775
1905.33	0.75185	0.90347	0.91546	0.7299
1906.29	0.75382	0.90395	0.91572	0.7317
1907.25	0.75547	0.90451	0.91602	0.73314
1908.22	0.75666	0.90495	0.91627	0.73418
1909.18	0.75725	0.90505	0.91638	0.73479
1910.15	0.75726	0.90481	0.91636	0.73504
1911.11	0.75705	0.90435	0.91627	0.73515
1912.08	0.75723	0.90384	0.91616	0.73554
1913.04	0.75845	0.90332	0.91605	0.73663
1914	0.7611	0.90274	0.91591	0.73872
1914.97	0.7651	0.9021	0.91574	0.74176
1915.93	0.76985	0.9015	0.91558	0.7454
1916.9	0.77446	0.90114	0.9155	0.74904
1917.86	0.77813	0.90122	0.91558	0.7521
1918.82	0.78053	0.90184	0.91587	0.75429
1919.79	0.78183	0.90288	0.91635	0.75564
1920.75	0.7824	0.90405	0.91695	0.75636
1921.72	0.78253	0.90496	0.91753	0.75667
1922.68	0.78223	0.90534	0.91798	0.75664
1923.65	0.78144	0.90517	0.91823	0.75628
1924.61	0.78022	0.90467	0.9183	0.75569
1925.57	0.77892	0.90413	0.91826	0.7551
1926.54	0.77801	0.90374	0.91816	0.75488
1927.5	0.7779	0.90354	0.91804	0.75532
1928.47	0.7787	0.90349	0.91793	0.75655
1929.43	0.78025	0.90355	0.91783	0.75849
1930.4	0.78229	0.90366	0.91777	0.76095
1931.36	0.78455	0.90378	0.91773	0.76372
1932.32	0.78682	0.90387	0.91772	0.76663
1933.29	0.78896	0.90389	0.91775	0.76952
1934.25	0.79082	0.90385	0.91785	0.77223
1935.22	0.79229	0.90377	0.91802	0.77462
1936.18	0.79339	0.9037	0.91822	0.77663
1937.14	0.79435	0.90366	0.91839	0.77835
1938.11	0.79548	0.90365	0.91845	0.77997
1939.07	0.79701	0.90368	0.91838	0.78167
1940.04	0.79891	0.9038	0.91822	0.7835
1941	0.80085	0.904	0.91804	0.78536
1941.97	0.80236	0.90421	0.91792	0.78703
1942.93	0.80314	0.9043	0.9179	0.78836
1943.89	0.80325	0.90418	0.91793	0.78938
1944.86	0.80311	0.90388	0.91795	0.79032
1945.82	0.80322	0.90341	0.91786	0.79147
1946.79	0.80388	0.90281	0.91762	0.79301
1947.75	0.8051	0.90216	0.91723	0.7949
1948.72	0.80662	0.90158	0.91677	0.79696
1949.68	0.80816	0.90119	0.91635	0.79894
1950.64	0.80946	0.90106	0.91606	0.80065
1951.61	0.81042	0.90115	0.91592	0.80199
1952.57	0.81101	0.90133	0.91592	0.80296
1953.54	0.81124	0.90147	0.91596	0.80359
1954.5	0.81117	0.90149	0.91595	0.80395
1955.47	0.81088	0.90135	0.91582	0.80415
1956.43	0.81054	0.90112	0.91558	0.80435
1957.39	0.81032	0.90085	0.91529	0.8047
1958.36	0.81036	0.90059	0.91502	0.80536
1959.32	0.81073	0.90033	0.91484	0.80641
1960.29	0.81144	0.90007	0.91475	0.80788
1961.25	0.81247	0.89983	0.91472	0.80973
1962.22	0.81385	0.89968	0.91468	0.81194
1963.18	0.81555	0.89967	0.9146	0.81443
1964.14	0.81739	0.89981	0.91446	0.81703
1965.11	0.81903	0.90005	0.91426	0.81947
1966.07	0.82002	0.90019	0.91402	0.82144
1967.04	0.82001	0.90007	0.91374	0.82264
1968	0.81896	0.89965	0.91344	0.82297
1968.96	0.81718	0.89902	0.91315	0.82256
1969.93	0.81522	0.89837	0.9129	0.82172
1970.89	0.81364	0.89784	0.9127	0.82079
1971.86	0.81282	0.89746	0.91255	0.82006
1972.82	0.8129	0.89721	0.91247	0.81965
1973.79	0.81386	0.89704	0.91242	0.81959
1974.75	0.81555	0.8969	0.91236	0.81983
1975.71	0.81783	0.89677	0.91228	0.82033
1976.68	0.82056	0.89667	0.91215	0.82105
1977.64	0.82359	0.89659	0.912	0.82191
1978.61	0.82673	0.89654	0.91186	0.82281
1979.57	0.82977	0.89648	0.91177	0.82362
1980.54	0.83252	0.8964	0.91173	0.82424
1981.5	0.83488	0.89631	0.9117	0.82458
1982.46	0.83678	0.89626	0.91163	0.82463
1983.43	0.83825	0.89629	0.91152	0.82441
1984.39	0.83936	0.89642	0.91138	0.82402
1985.36	0.84025	0.89659	0.91125	0.82356
1986.32	0.84115	0.89673	0.91117	0.82321
1987.29	0.84229	0.89678	0.91116	0.82318
1988.25	0.84384	0.89678	0.91121	0.82359
1989.21	0.84582	0.89676	0.91127	0.82448
1990.18	0.84798	0.89678	0.91129	0.82573
1991.14	0.84997	0.89677	0.91122	0.82711
1992.11	0.85148	0.89664	0.91102	0.8284
1993.07	0.85243	0.8963	0.91068	0.82946
1994.03	0.85299	0.8958	0.91026	0.83029
1995	0.85345	0.89522	0.90984	0.83101
1995.96	0.85405	0.8947	0.90953	0.83167
1996.93	0.85482	0.89435	0.90936	0.83228
1997.89	0.85562	0.89419	0.90934	0.83272
1998.86	0.85621	0.89417	0.90939	0.83288
1999.82	0.85648	0.8942	0.90941	0.8327
2000.78	0.85647	0.89418	0.90932	0.83224
2001.75	0.85634	0.89408	0.9091	0.83167
2002.71	0.85631	0.89395	0.90883	0.83119
2003.68	0.85657	0.89386	0.90857	0.83096
2004.64	0.8572	0.89382	0.9084	0.8311
2005.61	0.85823	0.89384	0.90828	0.83165
2006.57	0.85961	0.89385	0.90819	0.8326
2007.53	0.86126	0.89379	0.90807	0.83388
2008.5	0.86305	0.89361	0.90792	0.83539
2009.46	0.86484	0.89331	0.90776	0.83699
2010.43	0.86652	0.89297	0.90763	0.83856
2011.39	0.86807	0.89266	0.90753	0.84002
2012.36	0.86951	0.89248	0.90746	0.84134
2013.32	0.87087	0.89243	0.90741	0.84251
2014.28	0.87208	0.89247	0.90734	0.84351
2015.25	0.87299	0.89248	0.90723	0.84427
2016.21	0.87341	0.89237	0.90707	0.84473
2017.18	0.87326	0.8921	0.90686	0.84488
2018.14	0.87263	0.89178	0.90663	0.84483
2019.1	0.87181	0.89157	0.90645	0.84479
2020.07	0.87118	0.89158	0.90634	0.84499
2021.03	0.87102	0.89179	0.90633	0.84566
2022	0.87146	0.89206	0.90637	0.84685
2022.96	0.87241	0.8922	0.90639	0.84852
2023.93	0.87368	0.89211	0.90633	0.85051
2024.89	0.87502	0.89177	0.90614	0.85262
2025.85	0.87623	0.89129	0.90583	0.85465
2026.82	0.87718	0.89081	0.90548	0.85645
2027.78	0.8778	0.89043	0.90514	0.85794
2028.75	0.87806	0.89018	0.90489	0.85904
2029.71	0.87796	0.89004	0.90477	0.85976
2030.68	0.87758	0.88999	0.90478	0.86013
2031.64	0.877	0.89004	0.9049	0.86023
2032.6	0.87636	0.89017	0.90508	0.86016
2033.57	0.87578	0.89038	0.90526	0.86004
2034.53	0.8754	0.8906	0.90534	0.86
2035.5	0.87535	0.89077	0.90528	0.86015
2036.46	0.87574	0.89085	0.90508	0.86057
2037.43	0.8766	0.89085	0.90481	0.86131
2038.39	0.87788	0.89084	0.90458	0.86235
2039.35	0.87942	0.89087	0.90451	0.86357
2040.32	0.88098	0.89093	0.90463	0.86482
2041.28	0.88232	0.891	0.9049	0.86595
2042.25	0.88327	0.89101	0.9052	0.86683
2043.21	0.88377	0.89095	0.90541	0.86741
2044.17	0.88388	0.89086	0.90547	0.86773
2045.14	0.88369	0.89078	0.90536	0.86784
2046.1	0.88331	0.89075	0.90514	0.86785
2047.07	0.88284	0.89076	0.90483	0.86785
2048.03	0.88236	0.89076	0.9045	0.86794
2049	0.88199	0.89071	0.90418	0.8682
2049.96	0.8818	0.89059	0.90393	0.86872
2050.92	0.8819	0.89042	0.90378	0.86958
2051.89	0.88232	0.89026	0.90374	0.87079
2052.85	0.88308	0.89014	0.90379	0.87234
2053.82	0.88412	0.89007	0.90387	0.87417
2054.78	0.88537	0.89004	0.90391	0.87619
2055.75	0.88672	0.89002	0.90386	0.87824
2056.71	0.88804	0.88998	0.90374	0.88021
2057.67	0.88921	0.88992	0.90358	0.88195
2058.64	0.89017	0.88986	0.90346	0.88338
2059.6	0.89091	0.88983	0.90339	0.88446
2060.57	0.8915	0.88984	0.90339	0.88521
2061.53	0.892	0.8899	0.9034	0.88571
2062.5	0.89247	0.88999	0.90337	0.88602
2063.46	0.89291	0.89006	0.90327	0.8862
2064.42	0.8933	0.89008	0.90312	0.88631
2065.39	0.89366	0.89002	0.90297	0.8864
2066.35	0.89408	0.88988	0.90287	0.88659
2067.32	0.89471	0.88971	0.90285	0.887
2068.28	0.8957	0.88954	0.90287	0.88772
2069.25	0.89711	0.88941	0.90287	0.88879
2070.21	0.89887	0.88934	0.90278	0.89014
2071.17	0.90081	0.88932	0.9026	0.89163
2072.14	0.90273	0.88931	0.90236	0.89308
2073.1	0.90445	0.88929	0.90212	0.89434
2074.07	0.90584	0.88922	0.90194	0.8953
2075.03	0.90686	0.88911	0.90183	0.89591
2075.99	0.90751	0.88899	0.90177	0.89617
2076.96	0.90783	0.8889	0.90173	0.89615
2077.92	0.90789	0.88888	0.90172	0.89593
2078.89	0.90781	0.88895	0.90174	0.89563
2079.85	0.90773	0.88906	0.90178	0.89541
2080.82	0.90779	0.88917	0.90185	0.89541
2081.78	0.90809	0.88923	0.90193	0.89573
2082.74	0.90868	0.88922	0.90201	0.89644
2083.71	0.90959	0.88916	0.90207	0.89758
2084.67	0.91078	0.8891	0.90215	0.89909
2085.64	0.91217	0.88909	0.90225	0.9009
2086.6	0.91364	0.88918	0.90237	0.90288
2087.57	0.91503	0.88935	0.90248	0.90486
2088.53	0.91616	0.88958	0.90255	0.90668
2089.49	0.91691	0.88983	0.90256	0.90819
2090.46	0.91721	0.89003	0.90254	0.90931
2091.42	0.91708	0.89016	0.90251	0.91004
2092.39	0.91665	0.8902	0.90249	0.91041
2093.35	0.91608	0.89016	0.9025	0.91055
2094.32	0.91552	0.89008	0.90256	0.91057
2095.28	0.91509	0.89001	0.90267	0.91057
2096.24	0.91489	0.88998	0.90281	0.91065
2097.21	0.91495	0.89004	0.90299	0.91086
2098.17	0.91531	0.89019	0.90317	0.91125
2099.14	0.91594	0.89042	0.90336	0.91179
2100.1	0.91678	0.89069	0.90353	0.91245
2101.06	0.91781	0.89093	0.90365	0.91318
2102.03	0.91887	0.89109	0.90373	0.91388
2102.99	0.91985	0.89117	0.90377	0.91443
2103.96	0.92063	0.89119	0.90381	0.91475
2104.92	0.92113	0.8912	0.90387	0.91479
2105.89	0.9213	0.89127	0.90397	0.91452
2106.85	0.92116	0.89142	0.90411	0.91396
2107.81	0.92075	0.89162	0.90427	0.9132
2108.78	0.92017	0.89181	0.9044	0.91233
2109.74	0.91954	0.89194	0.9045	0.91148
2110.71	0.91898	0.89202	0.90456	0.91076
2111.67	0.9186	0.89212	0.90463	0.91031
2112.64	0.9185	0.89228	0.90473	0.91021
2113.6	0.91871	0.89255	0.90486	0.9105
2114.56	0.91924	0.89285	0.90503	0.91118
2115.53	0.92003	0.89308	0.9052	0.91218
2116.49	0.92099	0.89315	0.90535	0.91342
2117.46	0.92203	0.89304	0.90546	0.91477
2118.42	0.92301	0.89284	0.90554	0.91608
2119.39	0.92384	0.89268	0.90559	0.91725
2120.35	0.92442	0.89266	0.90563	0.91817
2121.31	0.92471	0.89278	0.90566	0.91881
2122.28	0.92471	0.89296	0.90569	0.91916
2123.24	0.92444	0.8931	0.90573	0.91927
2124.21	0.924	0.89316	0.90581	0.91922
2125.17	0.92348	0.89316	0.90592	0.9191
2126.13	0.92301	0.89317	0.90604	0.91905
2127.1	0.92268	0.89325	0.90613	0.91916
2128.06	0.92259	0.89338	0.90617	0.91952
2129.03	0.92278	0.89351	0.90613	0.92017
2129.99	0.92325	0.89357	0.90601	0.92111
2130.96	0.92398	0.89354	0.90585	0.92229
2131.92	0.92488	0.89346	0.90569	0.92361
2132.88	0.92588	0.89343	0.90559	0.92496
2133.85	0.92688	0.89352	0.90559	0.92622
2134.81	0.92777	0.89377	0.90569	0.92729
2135.78	0.92849	0.8941	0.90588	0.92808
2136.74	0.929	0.89442	0.9061	0.92854
2137.71	0.92929	0.89462	0.90629	0.92866
2138.67	0.92938	0.89463	0.9064	0.92848
2139.63	0.92936	0.89451	0.90643	0.92809
2140.6	0.92932	0.89432	0.90644	0.92757
2141.56	0.92936	0.89417	0.90649	0.92707
2142.53	0.92956	0.89412	0.9066	0.92667
2143.49	0.92999	0.89419	0.9068	0.92646
2144.46	0.93067	0.89434	0.90704	0.92648
2145.42	0.93158	0.89454	0.90727	0.92671
2146.38	0.93267	0.89474	0.90743	0.92711
2147.35	0.93384	0.89494	0.90753	0.9276
2148.31	0.93498	0.89513	0.90758	0.92808
2149.28	0.936	0.89532	0.90761	0.92843
2150.24	0.93678	0.89548	0.90766	0.92857
2151.2	0.93727	0.89564	0.90774	0.92841
2152.17	0.93743	0.89578	0.90786	0.92792
2153.13	0.93728	0.89594	0.90801	0.92714
2154.1	0.93688	0.89613	0.90817	0.92611
2155.06	0.93632	0.89635	0.9083	0.92498
2156.03	0.93572	0.89656	0.90838	0.92386
2156.99	0.9352	0.89672	0.90839	0.9229
2157.95	0.93487	0.8968	0.90836	0.92222
2158.92	0.9348	0.89681	0.90833	0.92192
2159.88	0.93506	0.8968	0.90835	0.92203
2160.85	0.93561	0.89679	0.90846	0.92255
2161.81	0.93642	0.89682	0.90869	0.92343
2162.78	0.9374	0.89688	0.90897	0.92455
2163.74	0.93843	0.89696	0.90923	0.92581
2164.7	0.9394	0.89704	0.9094	0.92705
2165.67	0.9402	0.89715	0.90947	0.92816
2166.63	0.94075	0.89729	0.90948	0.92904
2167.6	0.94101	0.89748	0.9095	0.92964
2168.56	0.94098	0.89772	0.9096	0.92995
2169.53	0.94071	0.89797	0.90982	0.93001
2170.49	0.94028	0.8982	0.91011	0.9299
2171.45	0.9398	0.8984	0.9104	0.92971
2172.42	0.93939	0.89856	0.91062	0.92957
2173.38	0.93916	0.89868	0.91076	0.92956
2174.35	0.93919	0.89877	0.91085	0.92978
2175.31	0.9395	0.89882	0.91093	0.93027
2176.27	0.94011	0.89886	0.91102	0.93104
2177.24	0.94095	0.89888	0.91113	0.93203
2178.2	0.94193	0.8989	0.9112	0.93317
2179.17	0.94294	0.89892	0.91118	0.93435
2180.13	0.94384	0.89896	0.91108	0.93545
2181.1	0.94453	0.89905	0.91094	0.93637
2182.06	0.94491	0.89921	0.91085	0.93702
2183.02	0.94493	0.89941	0.91086	0.93739
2183.99	0.9446	0.89965	0.91097	0.93746
2184.95	0.94396	0.89987	0.91112	0.93728
2185.92	0.94309	0.90003	0.91126	0.93692
2186.88	0.9421	0.90011	0.91136	0.93649
2187.85	0.9411	0.9001	0.91144	0.93611
2188.81	0.94022	0.90004	0.91154	0.9359
2189.77	0.93953	0.89995	0.91169	0.93593
2190.74	0.9391	0.89988	0.91188	0.93626
2191.7	0.93892	0.89987	0.91204	0.93689
2192.67	0.93897	0.89994	0.91214	0.93778
2193.63	0.93917	0.90012	0.91217	0.93882
2194.6	0.93941	0.90037	0.91219	0.93991
2195.56	0.93957	0.90065	0.91227	0.94093
2196.52	0.93955	0.90087	0.91243	0.94177
2197.49	0.93927	0.90097	0.91268	0.94235
2198.45	0.93867	0.90097	0.91295	0.94261
2199.42	0.93776	0.90093	0.91318	0.94254
2200.38	0.93657	0.90097	0.91333	0.94217
2201.34	0.93517	0.90118	0.91345	0.9416
2202.31	0.93369	0.90153	0.91358	0.94092
2203.27	0.93221	0.90194	0.91376	0.94025
2204.24	0.93085	0.90229	0.914	0.9397
2205.2	0.92969	0.90249	0.91428	0.93933
2206.17	0.92877	0.90256	0.91455	0.9392
2207.13	0.9281	0.90259	0.91479	0.9393
2208.09	0.92765	0.90268	0.91497	0.93959
2209.06	0.92735	0.90288	0.91511	0.94
2210.02	0.92711	0.90319	0.91525	0.94042
2210.99	0.92683	0.90352	0.91541	0.94076
2211.95	0.9264	0.90383	0.91561	0.94089
2212.92	0.92576	0.90408	0.91584	0.94074
2213.88	0.92487	0.90431	0.9161	0.94027
2214.84	0.92372	0.90455	0.91638	0.93948
2215.81	0.92235	0.90484	0.91669	0.93843
2216.77	0.92085	0.90514	0.91704	0.9372
2217.74	0.91929	0.90543	0.91743	0.9359
2218.7	0.91778	0.90568	0.91787	0.93466
2219.67	0.91639	0.90587	0.91832	0.93357
2220.63	0.91519	0.90603	0.91874	0.9327
2221.59	0.91422	0.90615	0.91907	0.93211
2222.56	0.91346	0.90624	0.91927	0.93179
2223.52	0.91289	0.9063	0.91933	0.93172
2224.49	0.91243	0.90633	0.91928	0.93182
2225.45	0.91199	0.90638	0.91919	0.93199
2226.41	0.91146	0.90646	0.91913	0.93213
2227.38	0.91076	0.90663	0.91918	0.93213
2228.34	0.90981	0.90688	0.91935	0.93192
2229.31	0.90859	0.90719	0.91961	0.93145
2230.27	0.90711	0.90753	0.9199	0.93073
2231.24	0.90541	0.90782	0.92013	0.92981
2232.2	0.90357	0.90801	0.92027	0.92875
2233.16	0.90171	0.90804	0.92032	0.92766
2234.13	0.89991	0.90795	0.92032	0.92664
2235.09	0.89829	0.90778	0.92034	0.92578
2236.06	0.89692	0.90766	0.92043	0.92517
2237.02	0.89584	0.90765	0.92056	0.92485
2237.99	0.89507	0.90779	0.92069	0.92484
2238.95	0.89458	0.90798	0.92076	0.92509
2239.91	0.89433	0.90811	0.92073	0.92556
2240.88	0.89421	0.90809	0.9206	0.92613
2241.84	0.89415	0.90791	0.92041	0.92671
2242.81	0.89405	0.90767	0.92022	0.92719
2243.77	0.89385	0.90751	0.92009	0.92752
2244.74	0.89351	0.90753	0.92007	0.92764
2245.7	0.89304	0.90772	0.92016	0.92757
2246.66	0.89249	0.90799	0.92032	0.92734
2247.63	0.89193	0.90819	0.92047	0.92703
2248.59	0.89144	0.90825	0.92054	0.92673
2249.56	0.89112	0.90814	0.92048	0.92655
2250.52	0.89104	0.90795	0.92029	0.92658
2251.49	0.89128	0.90773	0.92001	0.92687
2252.45	0.89184	0.90757	0.91974	0.92747
2253.41	0.89272	0.90747	0.91956	0.92835
2254.38	0.89386	0.90741	0.91951	0.92948
2255.34	0.89517	0.90734	0.91956	0.93074
2256.31	0.89653	0.90726	0.91963	0.93203
2257.27	0.89782	0.90715	0.91966	0.93321
2258.23	0.89892	0.90705	0.91961	0.93415
2259.2	0.89974	0.90699	0.9195	0.93476
2260.16	0.90022	0.90699	0.91938	0.93498
2261.13	0.90036	0.90702	0.91927	0.9348
2262.09	0.90018	0.90701	0.91916	0.93427
2263.06	0.89975	0.90691	0.919	0.93347
2264.02	0.89917	0.9067	0.91875	0.93251
2264.98	0.89855	0.90641	0.91845	0.93152
2265.95	0.898	0.90611	0.91816	0.93064
2266.91	0.89759	0.90587	0.91798	0.92994
2267.88	0.89739	0.90574	0.91796	0.92949
2268.84	0.89738	0.90574	0.91808	0.9293
2269.81	0.89755	0.90585	0.91827	0.92932
2270.77	0.89781	0.90606	0.91846	0.92945
2271.73	0.89804	0.90635	0.91862	0.92959
2272.7	0.89813	0.90667	0.91875	0.92959
2273.66	0.89798	0.90696	0.91886	0.92935
2274.63	0.89751	0.90717	0.91894	0.92878
2275.59	0.89667	0.90728	0.919	0.92785
2276.56	0.89549	0.90732	0.91903	0.92656
2277.52	0.89403	0.90735	0.91907	0.92497
2278.48	0.89236	0.90743	0.91913	0.92318
2279.45	0.8906	0.90755	0.91921	0.9213
2280.41	0.88888	0.90763	0.91927	0.91945
2281.38	0.88731	0.90759	0.91924	0.91774
2282.34	0.886	0.90737	0.91908	0.91627
2283.3	0.88452	0.90697	0.91877	0.91556
2284.27	0.88303	0.90643	0.9183	0.91484
2285.23	0.88155	0.90576	0.91769	0.91412
2286.2	0.88007	0.90498	0.91693	0.91341
2287.16	0.87858	0.9041	0.91606	0.91269
2288.13	0.8771	0.90314	0.91506	0.91197
2289.09	0.87562	0.90216	0.91397	0.91126
2290.05	0.87413	0.90125	0.91282	0.91054
2291.02	0.87265	0.90046	0.91165	0.90983
2291.98	0.87117	0.89977	0.91053	0.90911
2292.95	0.86968	0.89914	0.90951	0.90839
2293.91	0.8682	0.89851	0.90866	0.90768
2294.88	0.86672	0.89785	0.90802	0.90696
2295.84	0.86523	0.89722	0.90757	0.90624
2296.8	0.86375	0.89672	0.90729	0.90553
2297.77	0.86227	0.89645	0.90715	0.90481
2298.73	0.86078	0.89652	0.90721	0.9041
2299.7	0.8593	0.89694	0.90758	0.90338
2300.66	0.85782	0.89764	0.90834	0.90266
2301.63	0.85633	0.89847	0.90945	0.90195
2302.59	0.85485	0.89921	0.9107	0.90123
2303.55	0.85336	0.89969	0.91174	0.90052
2304.52	0.85188	0.8998	0.91224	0.8998
2305.48	0.8504	0.89957	0.91206	0.89908
2306.45	0.84891	0.89917	0.91136	0.89837
2307.41	0.84743	0.89886	0.91056	0.89765
2308.38	0.84595	0.89895	0.91025	0.89693
2309.34	0.84446	0.89961	0.91086	0.89622
2310.3	0.84298	0.90089	0.91253	0.8955
2311.27	0.8415	0.90266	0.91502	0.89479
2312.23	0.84001	0.90463	0.91784	0.89407
2313.2	0.83853	0.90652	0.92053	0.89335
2314.16	0.83705	0.90813	0.92288	0.89264
2315.12	0.83556	0.90944	0.92494	0.89192
2316.09	0.83408	0.91058	0.92697	0.8912
2317.05	0.8326	0.91174	0.92917	0.89049
2318.02	0.83111	0.91304	0.93154	0.88977
2318.98	0.82963	0.91442	0.93375	0.88906
2319.95	0.82814	0.91554	0.93521	0.88834
2320.91	0.82666	0.91592	0.93528	0.88762
2321.87	0.82518	0.91513	0.9336	0.88691
2322.84	0.82369	0.9131	0.93033	0.88619
2323.8	0.82221	0.91025	0.92626	0.88548
2324.77	0.82073	0.90736	0.92246	0.88476
2325.73	0.81924	0.90521	0.91994	0.88404
2326.7	0.81776	0.90431	0.91925	0.88333
2327.66	0.81628	0.90467	0.92027	0.88261
2328.62	0.81479	0.90585	0.92222	0.88189
2329.59	0.81331	0.90714	0.92399	0.88118
2330.55	0.81183	0.90786	0.92461	0.88046
2331.52	0.81034	0.90765	0.92375	0.87975
2332.48	0.80886	0.90663	0.92192	0.87903
2333.45	0.80738	0.9053	0.92006	0.87831
2334.41	0.80589	0.90417	0.91902	0.8776
2335.37	0.80441	0.90347	0.91899	0.87688
2336.34	0.80293	0.90302	0.91943	0.87617
2337.3	0.80144	0.90227	0.9194	0.87545
2338.27	0.79996	0.90072	0.91813	0.87473
2339.23	0.79847	0.89823	0.91557	0.87402
2340.19	0.79699	0.89535	0.91249	0.8733
2341.16	0.79551	0.89339	0.91049	0.87259
2342.12	0.79402	0.89408	0.91146	0.87187
2343.09	0.79254	0.89824	0.91612	0.87115
2344.05	0.79106	0.90394	0.92208	0.87044
2345.02	0.78957	0.90728	0.92484	0.86972
2345.98	0.78809	0.90619	0.92225	0.869
2346.94	0.78661	0.90215	0.91636	0.86829
2347.91	0.78512	0.89831	0.91109	0.86757
2348.87	0.78364	0.89716	0.90943	0.86686
2349.84	0.78215	0.89946	0.91217	0.86614
2350.8	0.78067	0.90416	0.9179	0.86542
2351.77	0.77919	0.90897	0.9238	0.86471
2352.73	0.7777	0.91159	0.92718	0.86399
2353.69	0.77622	0.91119	0.92718	0.86328
2354.66	0.77474	0.90867	0.9248	0.86256
2355.62	0.77325	0.90527	0.92088	0.86184
2356.59	0.77177	0.90155	0.91517	0.86113
2357.55	0.77029	0.89793	0.90792	0.86041
2358.52	0.7688	0.8954	0.90119	0.8597
2359.48	0.76732	0.89487	0.89778	0.85898
2360.44	0.76584	0.89615	0.89879	0.85826
2361.41	0.76435	0.89809	0.90283	0.85755
2362.37	0.76287	0.89981	0.90761	0.85683
2363.34	0.76139	0.90143	0.9118	0.85611
2364.3	0.7599	0.90363	0.91544	0.8554
2365.26	0.75842	0.90688	0.91932	0.85468
2366.23	0.75693	0.911	0.92404	0.85397
2367.19	0.75545	0.91547	0.9297	0.85325
2368.16	0.75397	0.91979	0.93582	0.85253
2369.12	0.75248	0.9237	0.94163	0.85182
2370.09	0.751	0.92707	0.94638	0.8511
2371.05	0.74952	0.92977	0.94964	0.85039
2372.01	0.74803	0.93161	0.95136	0.84967
2372.98	0.74655	0.93245	0.9518	0.84895
2373.94	0.74507	0.9322	0.95127	0.84824
2374.91	0.74358	0.9309	0.94996	0.84752
2375.87	0.7421	0.92872	0.94791	0.84681
2376.84	0.74062	0.9259	0.94511	0.84609
2377.8	0.73913	0.9227	0.94161	0.84537
2378.76	0.73765	0.91936	0.9376	0.84466
2379.73	0.73617	0.91615	0.93341	0.84394
2380.69	0.73468	0.91333	0.9295	0.84323
2381.66	0.7332	0.91114	0.9263	0.84251
2382.62	0.73171	0.90978	0.92414	0.84179
2383.59	0.73023	0.90929	0.92316	0.84108
2384.55	0.72875	0.90955	0.92323	0.84036
2385.51	0.72726	0.91026	0.92406	0.83965
2386.48	0.72578	0.91109	0.92522	0.83893
2387.44	0.7243	0.91173	0.92633	0.83821
2388.41	0.72281	0.91205	0.92713	0.8375
2389.37	0.72133	0.91207	0.92755	0.83678
2390.33	0.71985	0.91198	0.92769	0.83607
2391.3	0.71836	0.91195	0.92774	0.83535
2392.26	0.71688	0.91208	0.92783	0.83463
2393.23	0.7154	0.91235	0.92802	0.83392
2394.19	0.71391	0.91263	0.92824	0.8332
2395.16	0.71243	0.91279	0.92841	0.83249
2396.12	0.71095	0.91279	0.92847	0.83177
2397.08	0.70946	0.91268	0.92842	0.83105
2398.05	0.70798	0.91251	0.92832	0.83034
2399.01	0.70585	0.91237	0.92823	0.82937
2399.98	0.70349	0.91228	0.9282	0.82814
2400.94	0.70092	0.91222	0.92825	0.82665
2401.91	0.69819	0.91214	0.92832	0.82498
2402.87	0.69539	0.91204	0.92838	0.8232
2403.83	0.6926	0.91192	0.92837	0.82139
2404.8	0.68989	0.91184	0.9283	0.81963
2405.76	0.68732	0.91183	0.9282	0.81799
2406.73	0.68492	0.91191	0.92814	0.81649
2407.69	0.6827	0.91207	0.92819	0.81514
2408.66	0.68064	0.91225	0.92834	0.8139
2409.62	0.67868	0.91237	0.92854	0.81273
2410.58	0.67677	0.91239	0.9287	0.81154
2411.55	0.67481	0.91226	0.92873	0.81024
2412.51	0.67273	0.91202	0.92859	0.80874
2413.48	0.67048	0.91172	0.92832	0.80701
2414.44	0.66801	0.91144	0.92799	0.80502
2415.4	0.66531	0.91124	0.92768	0.80279
2416.37	0.66242	0.91116	0.92743	0.80041
2417.33	0.65938	0.91116	0.92725	0.79794
2418.3	0.65628	0.91119	0.92711	0.7955
2419.26	0.65318	0.91119	0.92703	0.79321
2420.23	0.65016	0.9111	0.927	0.79118
2421.19	0.64729	0.91096	0.92708	0.78949
2422.15	0.6446	0.9108	0.92725	0.78819
2423.12	0.64209	0.91068	0.92749	0.7873
2424.08	0.63974	0.91064	0.9277	0.78677
2425.05	0.63751	0.91065	0.92778	0.78652
2426.01	0.63531	0.91064	0.92767	0.78645
2426.98	0.63307	0.91053	0.92736	0.78644
2427.94	0.63069	0.91029	0.92693	0.78639
2428.9	0.62811	0.90992	0.92651	0.78619
2429.87	0.62527	0.90952	0.9262	0.78579
2430.83	0.62216	0.90915	0.92608	0.78518
2431.8	0.6188	0.9089	0.92613	0.78435
2432.76	0.61523	0.90878	0.92625	0.78338
2433.73	0.61153	0.90876	0.92634	0.78231
2434.69	0.60777	0.90879	0.92635	0.78123
2435.65	0.60403	0.90884	0.92627	0.78022
2436.62	0.60038	0.90891	0.92618	0.77934
2437.58	0.59686	0.909	0.92614	0.77863
2438.55	0.59351	0.90911	0.92618	0.77811
2439.51	0.59034	0.9092	0.92624	0.77774
2440.47	0.58733	0.9092	0.92619	0.77748
2441.44	0.58445	0.90906	0.92597	0.77725
2442.4	0.58166	0.90874	0.92556	0.77694
2443.37	0.5789	0.90828	0.92509	0.77646
2444.33	0.57614	0.90781	0.92473	0.77576
2445.3	0.57334	0.90745	0.92459	0.77479
2446.26	0.5705	0.90732	0.92471	0.77354
2447.22	0.56762	0.90744	0.92501	0.77205
2448.19	0.56472	0.90774	0.92534	0.77037
2449.15	0.56184	0.90809	0.92559	0.76859
2450.12	0.55902	0.90837	0.92572	0.76677
2451.08	0.55629	0.9085	0.92574	0.76501
2452.05	0.55368	0.9085	0.92568	0.76337
2453.01	0.55122	0.90843	0.92557	0.76191
2453.97	0.54891	0.90831	0.92542	0.76064
2454.94	0.54674	0.90815	0.92525	0.75957
2455.9	0.54468	0.90789	0.92507	0.75864
2456.87	0.54267	0.9075	0.92489	0.7578
2457.83	0.54067	0.90702	0.92473	0.75696
2458.8	0.53861	0.90655	0.92462	0.75605
2459.76	0.53647	0.90625	0.92457	0.75502
2460.72	0.53422	0.9062	0.92458	0.75383
2461.69	0.53187	0.90637	0.92464	0.75249
2462.65	0.52944	0.90663	0.92471	0.75103
2463.62	0.52697	0.90677	0.92471	0.74951
2464.58	0.52452	0.90665	0.92458	0.74799
2465.54	0.52214	0.90624	0.92427	0.74654
2466.51	0.51988	0.90566	0.92386	0.74524
2467.47	0.51777	0.90512	0.92344	0.74414
2468.44	0.51584	0.90481	0.92317	0.74328
2469.4	0.51406	0.9048	0.92312	0.74265
2470.37	0.51241	0.90501	0.92325	0.74222
2471.33	0.51085	0.90528	0.92345	0.74192
2472.29	0.50929	0.90541	0.92355	0.74165
2473.26	0.50769	0.9053	0.92346	0.74131
2474.22	0.50596	0.90496	0.9232	0.74083
2475.19	0.50405	0.90454	0.9229	0.74012
2476.15	0.50195	0.90418	0.92271	0.73916
2477.12	0.49963	0.90399	0.9227	0.73791
2478.08	0.49712	0.90398	0.92286	0.7364
[truncated: 1,579 more rows]

## Sheet: Figure S6 (b)
800	-0.07336	800	-0.0545
799	-0.04427	799	0.01173
798	-0.04946	798	0.00842
797	-0.05466	797	0.00643
796	-0.06899	796	0.00862
795	-0.06749	795	0.02139
794	-0.01645	794	0.03863
793	-0.0185	793	0.05965
792	-0.03304	792	0.06311
791	-0.04045	791	0.06112
790	-0.04784	790	0.03658
789	-0.02696	789	0.07134
788	-0.00536	788	0.0688
787	0.00383	787	0.02475
786	-0.07073	786	0.02471
785	-0.09645	785	0.04744
784	-0.09562	784	0.0326
783	-0.10792	783	-0.00498
782	-0.0798	782	0.04379
781	-0.12111	781	0.0508
780	-0.1115	780	0.05723
779	-0.11225	779	0.07903
778	-0.11164	778	0.06242
777	-0.11551	777	0.04283
776	-0.11372	776	0.05488
775	-0.12472	775	0.07598
774	-0.18782	774	0.03508
773	-0.1615	773	0.02215
772	-0.18009	772	-0.02632
771	-0.20247	771	-0.04879
770	-0.21305	770	-0.09732
769	-0.25397	769	-0.13645
768	-0.20368	768	-0.13923
767	-0.1909	767	-0.14193
766	-0.11781	766	-0.07094
765	-0.13408	765	-0.09629
764	-0.12714	764	-0.06184
763	-0.14299	763	-0.06083
762	-0.1216	762	0.00253
761	-0.09362	761	0.05521
760	-0.12238	760	0.0307
759	-0.14083	759	0.01023
758	-0.15148	758	-0.02866
757	-0.17809	757	-0.08218
756	-0.15205	756	-0.09402
755	-0.14769	755	-0.07438
754	-0.12874	754	-0.0863
753	-0.13353	753	-0.1209
752	-0.11539	752	-0.11796
751	-0.10674	751	-0.13803
750	-0.13656	750	-0.12436
749	-0.13128	749	-0.12048
748	-0.12602	748	-0.08104
747	-0.1902	747	-0.14303
746	-0.21691	746	-0.14373
745	-0.20801	745	-0.09776
744	-0.17243	744	-0.06512
743	-0.16973	743	-0.03336
742	-0.20058	742	-0.07488
741	-0.21872	741	-0.08787
740	-0.18566	740	-0.05113
739	-0.13585	739	-0.02113
738	-0.09232	738	0.00401
737	-0.06739	737	0.01281
736	-0.07872	736	-0.003
735	-0.12967	735	-0.04192
734	-0.10979	734	-0.01463
733	-0.06801	733	0.0101
732	-0.06335	732	0.03407
731	-0.07988	731	0.04331
730	-0.07961	730	0.07258
729	-0.10428	729	0.03174
728	-0.11077	728	0.01831
727	-0.06903	727	0.05649
726	-0.0498	726	0.07013
725	-0.0425	725	0.06272
724	-0.04151	724	0.0342
723	-0.02407	723	0.03571
722	-0.04598	722	-0.02496
721	-0.05673	721	0.00166
720	-0.04824	720	0.04235
719	-0.06334	719	0.03342
718	-0.0759	718	0.0051
717	-0.09296	717	-0.00919
716	-0.10457	716	0.04238
715	-0.08466	715	0.0657
714	-0.10411	714	0.08907
713	-0.13819	713	0.07445
712	-0.14641	712	0.05414
711	-0.12868	711	0.04002
710	-0.15111	710	0.06483
709	-0.15021	709	0.04866
708	-0.12966	708	0.00557
707	-0.14303	707	-0.04793
706	-0.15485	706	-0.05611
705	-0.11541	705	-0.05964
704	-0.10695	704	-0.10166
703	-0.11309	703	-0.10514
702	-0.13561	702	-0.12212
701	-0.13381	701	-0.14563
700	-0.14037	700	-0.11188
699	-0.13873	699	-0.07704
698	-0.15048	698	-0.09847
697	-0.13764	697	-0.10638
696	-0.1559	696	-0.07114
695	-0.16416	695	-0.05618
694	-0.13021	694	-0.02283
693	-0.12497	693	0.00534
692	-0.11882	692	-0.00983
691	-0.17132	691	-0.03965
690	-0.15545	690	-0.0114
689	-0.14962	689	0.03169
688	-0.11445	688	0.03827
687	-0.11428	687	0.07084
686	-0.16255	686	0.02999
685	-0.17681	685	0.02656
684	-0.1549	684	0.04731
683	-0.14848	683	0.0659
682	-0.14591	682	0.03434
681	-0.15935	681	-0.03112
680	-0.17653	680	-0.04788
679	-0.16927	679	-0.05152
678	-0.11127	678	-0.01369
677	-0.08233	677	-0.022
676	-0.07202	676	-0.01828
675	-0.06746	675	-0.04315
674	-0.06973	674	-0.03823
673	-0.07703	673	-0.02743
672	-0.06601	672	-0.0327
671	-0.0771	671	-0.0031
670	-0.06326	670	-0.0183
669	-0.07797	669	-0.00774
668	-0.10025	668	-0.0043
667	-0.10747	667	0.00636
666	-0.15108	666	-0.00955
665	-0.14237	665	0.00226
664	-0.11921	664	0.03617
663	-0.12494	663	-0.00574
662	-0.1716	662	-0.02728
661	-0.22584	661	-0.07107
660	-0.18689	660	-0.05021
659	-0.19314	659	-0.00757
658	-0.17773	658	0.00146
657	-0.16329	657	-0.00879
656	-0.18454	656	-0.03889
655	-0.17414	655	-0.06075
654	-0.13657	654	-0.05821
653	-0.10406	653	-0.06473
652	-0.13111	652	-0.08861
651	-0.15262	651	-0.12718
650	-0.17306	650	-0.14742
649	-0.14299	649	-0.15786
648	-0.15057	648	-0.11779
647	-0.19875	647	-0.12942
646	-0.19825	646	-0.09366
645	-0.18651	645	-0.047
644	-0.14192	644	-0.04507
643	-0.17211	643	-0.08993
642	-0.15803	642	-0.09919
641	-0.15436	641	-0.08668
640	-0.14553	640	-0.0917
639	-0.13678	639	-0.07717
638	-0.14206	638	-0.10401
637	-0.15984	637	-0.12951
636	-0.16414	636	-0.14707
635	-0.13821	635	-0.1539
634	-0.13859	634	-0.09841
633	-0.11726	633	-0.07503
632	-0.11765	632	-0.08444
631	-0.08707	631	-0.09251
630	-0.10044	630	-0.09098
629	-0.11682	629	-0.1124
628	-0.10675	628	-0.06533
627	-0.10323	627	-0.0064
626	-0.06997	626	0.02697
625	-0.1199	625	-0.00777
624	-0.13285	624	-0.00324
623	-0.15976	623	0.000952451
622	-0.12284	622	0.02547
621	-0.11481	621	0.04347
620	-0.13581	620	0.05221
619	-0.09969	619	0.05396
618	-0.11073	618	0.02307
617	-0.10947	617	-0.00197
616	-0.11964	616	0.00768
615	-0.10276	615	0.01812
614	-0.12211	614	0.02019
613	-0.14055	613	0.0056
612	-0.12952	612	-0.01208
611	-0.12254	611	-0.00998
610	-0.11863	610	0.00476
609	-0.15369	609	-0.01181
608	-0.12787	608	0.00672
607	-0.12565	607	0.0044
606	-0.11156	606	-0.0222
605	-0.11308	605	-0.00565
604	-0.08694	604	-0.00192
603	-0.05201	603	0.0099
602	-0.05722	602	-0.02491
601	-0.03072	601	0.02003
600	7.14408e-05	600	0.02323
599	0.00959	599	0.03095
598	0.01519	598	0.07536
597	0.03829	597	0.07878
596	0.03677	596	0.09921
595	-0.00391	595	0.07953
594	-0.01853	594	0.10288
593	-0.00203	593	0.12668
592	-0.02761	592	0.13368
591	-0.04282	591	0.09075
590	-0.05337	590	0.07103
589	-0.04293	589	0.05934
588	-0.06548	588	0.01749
587	-0.05625	587	0.02036
586	-0.0573	586	0.01227
585	-0.06093	585	-0.0178
584	-0.06513	584	-0.04524
583	-0.05417	583	-0.01439
582	-0.00799	582	0.03071
581	-0.01439	581	0.03345
580	-0.04297	580	0.01718
579	-0.04223	579	0.00611
578	-0.08186	578	-0.01271
577	-0.078	577	-0.02451
576	-0.09686	576	-0.02999
575	-0.10459	575	-0.02482
574	-0.11214	574	-0.01898
573	-0.15214	573	-0.02675
572	-0.16743	572	-0.03022
571	-0.13451	571	0.01857
570	-0.08872	570	0.0599
569	-0.09311	569	0.06986
568	-0.07075	568	0.07741
567	-0.11306	567	0.05063
566	-0.13117	566	0.000262751
565	-0.10239	565	-0.01062
564	-0.09224	564	0.00996
563	-0.08354	563	-0.0017
562	-0.12931	562	-0.04308
561	-0.14066	561	-0.08201
560	-0.13049	560	-0.05201
559	-0.11924	559	-0.08607
558	-0.096	558	-0.08845
557	-0.12111	557	-0.08208
556	-0.11708	556	-0.10487
555	-0.1351	555	-0.13092
554	-0.11745	554	-0.10962
553	-0.10112	553	-0.1023
552	-0.1011	552	-0.0943
551	-0.12383	551	-0.11752
550	-0.13412	550	-0.10249
549	-0.1392	549	-0.09544
548	-0.13563	548	-0.07539
547	-0.14743	547	-0.05138
546	-0.16727	546	-0.04246
545	-0.18106	545	-0.05459
544	-0.18086	544	-0.02059
543	-0.15185	543	0.04201
542	-0.13089	542	0.05456
541	-0.10847	541	0.05743
540	-0.07868	540	0.08212
539	-0.07487	539	0.0687
538	-0.04067	538	0.08535
537	-0.05246	537	0.09327
536	-0.03926	536	0.06207
535	-0.05159	535	0.04106
534	-0.05726	534	0.01747
533	-0.08794	533	-0.00388
532	-0.07649	532	-0.00445
531	-0.05749	531	0.01841
530	-0.06504	530	0.00108
529	-0.06355	529	0.00469
528	-0.05539	528	0.01699
527	-0.04387	527	0.03286
526	-0.0623	526	0.04124
525	-0.02632	525	0.09196
524	-0.04729	524	0.06949
523	-0.03899	523	0.04985
522	-0.0274	522	0.01151
521	-0.01543	521	0.03582
520	-0.00715	520	0.00909
519	-0.00362	519	0.00745
518	-0.00467	518	-0.00189
517	-0.00418	517	0.01315
516	-0.01597	516	0.02342
515	-0.02108	515	0.03349
514	-0.01729	514	0.03489
513	-0.01448	513	0.02256
512	0.03396	512	0.01951
511	0.00968	511	0.01956
510	0.01668	510	0.03546
509	0.02069	509	-0.00585
508	0.05964	508	0.02241
507	0.07694	507	0.00116
506	0.06203	506	0.00384
505	0.03412	505	0.02928
504	-0.00143	504	0.02335
503	0.00753	503	0.0234
502	0.01852	502	-0.00536
501	-0.00483	501	-0.00419
500	-0.0116	500	-0.02424
499	0.000104441	499	-0.03763
498	0.04994	498	-0.01253
497	0.03734	497	-0.00511
496	0.05449	496	-0.0114
495	0.08239	495	-0.00405
494	0.04616	494	-0.01294
493	0.04606	493	-0.01128
492	0.02617	492	-0.02268
491	-0.01592	491	-0.00921
490	-0.07882	490	-0.04175
489	-0.0976	489	-0.03349
488	-0.083	488	-0.04597
487	-0.10052	487	-0.02295
486	-0.12479	486	-0.03436
485	-0.09313	485	-0.03424
484	-0.05757	484	-0.02562
483	-0.07481	483	-0.05964
482	-0.07088	482	-0.05293
481	-0.05952	481	-0.03031
480	-0.05477	480	-0.01391
479	-0.08423	479	-0.04018
478	-0.07019	478	-0.04678
477	-0.06824	477	-0.02868
476	-0.06837	476	-0.01375
475	-0.05283	475	-0.00679
474	-0.02451	474	0.04495
473	-0.03714	473	0.04023
472	-0.03997	472	0.03062
471	-0.03687	471	0.0137
470	0.00776	470	0.04254
469	0.00366	469	0.03287
468	-0.01055	468	0.00819
467	-0.04328	467	-0.02506
466	-0.06406	466	-0.09613
465	-0.05221	465	-0.1167
464	-0.04232	464	-0.11205
463	-0.06482	463	-0.12832
462	-0.07116	462	-0.12425
461	-0.08155	461	-0.12228
460	-0.06897	460	-0.08983
459	-0.05306	459	-0.0991
458	-0.0355	458	-0.07937
457	-0.000759559	457	-0.0318
456	-0.0148	456	-0.04541
455	-0.04886	455	-0.06121
454	-0.06175	454	-0.06609
453	-0.0947	453	-0.08307
452	-0.10369	452	-0.09307
451	-0.1392	451	-0.06937
450	-0.10944	450	-0.01632
449	-0.12912	449	-0.01515
448	-0.10569	448	-0.04827
447	-0.09495	447	-0.02877
446	-0.07272	446	-0.02668
445	-0.07312	445	-0.01725
444	-0.06456	444	-0.00231
443	-0.01645	443	-0.00689
442	-0.03261	442	-0.03022
441	-0.0572	441	-0.08308
440	-0.07929	440	-0.05664
439	-0.10572	439	-0.10946
438	-0.08874	438	-0.07228
437	-0.10646	437	-0.07028
436	-0.13014	436	-0.10356
435	-0.12633	435	-0.09692
434	-0.13637	434	-0.05713
433	-0.10274	433	-0.04301
432	-0.08353	432	-0.05684
431	-0.10853	431	-0.06589
430	-0.05887	430	-0.01581
429	-0.03748	429	-0.01058
428	-0.02933	428	-0.01022
427	-0.00911	427	0.0307
426	-0.03415	426	-0.02118
425	-0.05982	425	-0.03425
424	-0.08783	424	-0.00461
423	-0.0988	423	-0.01063
422	-0.13014	422	-0.03919
421	-0.12198	421	-0.02973
420	-0.0935	420	-0.01627
419	-0.0668	419	-0.0195
418	-0.0386	418	-0.00528
417	-0.02775	417	0.00326
416	-0.0179	416	-0.00524
415	-0.03099	415	-0.02855
414	0.02487	414	0.00846
413	-0.01372	413	-0.03412
412	-0.00903	412	-0.02957
411	-0.02642	411	-0.06132
410	-0.06548	410	-0.08065
409	-0.10966	409	-0.13267
408	-0.09688	408	-0.1293
407	-0.04249	407	-0.09701
406	-0.03865	406	-0.08495
405	-0.03148	405	-0.09669
404	-0.05474	404	-0.1079
403	-0.05164	403	-0.08132
402	-0.04873	402	-0.08348
401	-0.0029	401	-0.05153
400	0.0263	400	-0.03287
399	-0.01306	399	-0.08025
398	-0.03881	398	-0.13488
397	-0.03888	397	-0.1112
396	-0.01524	396	-0.08245
395	-0.04006	395	-0.10047
394	-0.03001	394	-0.11056
393	-0.08825	393	-0.14591
392	-0.08658	392	-0.13069
391	-0.05891	391	-0.07364
390	0.00936	390	0.00671
389	-0.00365	389	-0.03404
388	0.00499	388	-0.05251
387	0.02008	387	-0.05047
386	0.05424	386	-0.04692
385	0.09283	385	-0.01264
384	0.0841	384	-0.00515
383	0.08325	383	-0.00307
382	0.06042	382	-0.00274
381	0.0552	381	0.02379
380	0.03778	380	0.05335
379	0.03173	379	0.04333
378	0.05624	378	0.05298
377	0.05374	377	0.06456
376	0.11184	376	0.1006
375	0.12897	375	0.10245
374	0.0873	374	0.08709
373	0.07209	373	0.07838
372	0.10343	372	0.11903
371	0.11177	371	0.14864
370	0.04626	370	0.14373
369	0.05221	369	0.16484
368	0.0126	368	0.18477
367	-0.07042	367	0.13222
366	-0.01305	366	0.16552
365	0.04684	365	0.19831
364	-0.00464	364	0.12376
363	0.00862	363	0.1537
362	0.03632	362	0.13573
361	0.0468	361	0.14761
360	0.05625	360	0.14952
359	0.11172	359	0.18911
358	0.1155	358	0.17079
357	0.09894	357	0.18113
356	0.04407	356	0.13447
355	0.07604	355	0.11909
354	0.06571	354	0.11132
353	0.06477	353	0.06617
352	0.05151	352	-0.00122
351	0.01324	351	-0.01877
350	0.00446	350	-0.0263
349	-0.00261	349	-0.05148
348	0.02869	348	-0.04149
347	0.05376	347	-0.01777
346	0.10078	346	0.02682
345	0.13402	345	0.07972
344	0.14328	344	0.18695
343	0.135	343	0.16004
342	0.07967	342	0.13038
341	0.05436	341	0.11281
340	-0.00679	340	0.14711
339	0.01688	339	0.16622
338	-0.02263	338	0.16021
337	-0.08764	337	0.09278
336	0.00179	336	0.06976
335	0.04176	335	0.09708
334	0.08128	334	0.14459
333	0.00599	333	0.01842
332	0.05716	332	0.07271
331	0.06253	331	0.02048
330	0.06373	330	-0.00247
329	0.14085	329	0.07722
328	0.01828	328	0.04622
327	-0.08526	327	-0.00207
326	-0.09175	326	-0.00869
325	-0.02315	325	0.07451
324	0.00813	324	0.06738
323	0.02558	323	0.10813
322	-0.00206	322	0.12353
321	0.0145	321	0.15524
320	0.02665	320	0.13518
319	0.06531	319	0.13703
318	0.12325	318	0.17086
317	0.11566	317	0.14926
316	0.15568	316	0.19731
315	0.13732	315	0.22486
314	0.126	314	0.14813
313	0.07681	313	0.15806
312	0.09699	312	0.0469
311	0.11486	311	0.12605
310	0.09723	310	0.09534
309	0.14622	309	0.12515
308	0.21155	308	0.1102
307	0.23953	307	0.10291
306	0.20833	306	0.05964
305	0.27748	305	0.02164
304	0.25625	304	0.2007
303	0.34869	303	0.22911
302	0.43312	302	0.24551
301	0.45397	301	0.2647
300	0.51202	300	0.28752
299	0.57854	299	0.33473
298	0.58397	298	0.33363
297	0.61682	297	0.40289
296	0.68961	296	0.36228
295	0.60155	295	0.38776
294	0.51922	294	0.44343
293	0.54468	293	0.43129
292	0.40694	292	0.31506
291	0.36632	291	0.42253
290	0.35204	290	0.41993
289	0.2105	289	0.42335
288	0.16609	288	0.4984
287	0.08998	287	0.49804
286	0.12554	286	0.51703
285	0.28404	285	0.5761
284	0.49425	284	0.79052
283	0.52857	283	0.67885
282	0.54158	282	0.70797
281	0.64837	281	0.65512
280	0.68279	280	0.49435
279	0.78527	279	0.54674
278	0.91474	278	0.60509
277	0.9771	277	0.65078
276	0.9289	276	0.68066
275	0.84419	275	0.6775
274	0.83739	274	0.58117
273	0.6625	273	0.52997
272	0.55701	272	0.48128
271	0.31725	271	0.34766
270	0.20907	270	0.03682
269	0.0212	269	-0.1665
268	-0.1129	268	-0.27449
267	-0.02067	267	-0.24355
266	0.16267	266	-0.10923
265	0.34963	265	0.04679
264	0.22022	264	0.13755
263	0.28095	263	0.17301
262	0.22605	262	0.25966
261	0.07661	261	0.1907
260	-0.10502	260	0.10118
259	-0.13797	259	0.12039
258	0.12083	258	0.19319
257	-0.15691	257	0.30361
256	-0.2531	256	0.0677
255	-0.06863	255	0.31057
254	0.13875	254	0.39673
253	0.40733	253	0.57646
252	0.46724	252	0.33857
251	0.44262	251	0.42499
250	0.44593	250	0.28105
