# Supplementary material for: In-depth chiral sensing capability of C-dots in a biomimetic protein-based hydrogel: a probe for chiral recognition applications
Source: Royal Society of Chemistry journal article supplement (doi:10.1039/d5bm01508a), 2026-01-01
Supplement: d5bm01508a1.zip [file Figure S6.xlsx]

## Sheet: Figure S6 (a)
200	2.882	2.163
201	2.929	2.24
202	3.009	2.307
203	3.063	2.352
204	3.031	2.403
205	3.183	2.45
206	3.145	2.514
207	3.245	2.563
208	3.246	2.603
209	3.313	2.671
210	3.318	2.709
211	3.438	2.765
212	3.371	2.803
213	3.457	2.856
214	3.592	2.893
215	3.516	2.953
216	3.623	2.988
217	3.781	3.008
218	3.556	3.05
219	3.622	3.067
220	3.632	3.04
221	3.74	3.025
222	3.859	2.971
223	3.735	2.882
224	3.793	2.789
225	3.814	2.677
226	3.999	2.565
227	3.9	2.45
228	3.74	2.351
229	3.864	2.255
230	3.932	2.164
231	3.864	2.079
232	3.871	2.001
233	4.136	1.934
234	3.993	1.875
235	3.909	1.819
236	3.914	1.773
237	4.136	1.723
238	3.957	1.676
239	4.12	1.634
240	4.031	1.591
241	4.016	1.55
242	4.113	1.512
243	4.214	1.475
244	4.059	1.435
245	4.09	1.399
246	4.089	1.36
247	4.001	1.322
248	4.117	1.28
249	4.289	1.234
250	4.006	1.188
251	4.25	1.141
252	4.099	1.092
253	3.918	1.045
254	3.925	0.997
255	4.016	0.95
256	4.199	0.903
257	4.168	0.855
258	4.188	0.807
259	3.94	0.757
260	4.063	0.709
261	3.996	0.661
262	4.265	0.616
263	4.04	0.573
264	3.958	0.534
265	4.24	0.499
266	4.079	0.467
267	3.976	0.44
268	4.236	0.416
269	3.962	0.395
270	4.041	0.378
271	4.206	0.361
272	4.16	0.347
273	3.983	0.335
274	4.177	0.323
275	4.129	0.312
276	4.02	0.303
277	4.276	0.294
278	3.993	0.286
279	3.939	0.279
280	3.923	0.272
281	3.916	0.266
282	3.922	0.261
283	3.979	0.256
284	3.96	0.251
285	3.87	0.247
286	3.784	0.243
287	3.821	0.24
288	3.794	0.237
289	3.754	0.235
290	3.747	0.234
291	3.599	0.233
292	3.539	0.232
293	3.318	0.233
294	2.81	0.233
295	2.358	0.234
296	1.977	0.236
297	1.672	0.238
298	1.448	0.24
299	1.27	0.242
300	1.129	0.245
301	1.01	0.249
302	0.916	0.253
303	0.832	0.257
304	0.763	0.262
305	0.708	0.268
306	0.634	0.275
307	0.598	0.283
308	0.566	0.29
309	0.543	0.297
310	0.523	0.306
311	0.507	0.314
312	0.494	0.324
313	0.481	0.333
314	0.47	0.344
315	0.461	0.354
316	0.452	0.365
317	0.443	0.377
318	0.435	0.39
319	0.425	0.402
320	0.419	0.416
321	0.413	0.429
322	0.41	0.442
323	0.403	0.456
324	0.399	0.47
325	0.396	0.485
326	0.393	0.498
327	0.39	0.513
328	0.386	0.527
329	0.384	0.542
330	0.382	0.556
331	0.379	0.57
332	0.376	0.584
333	0.373	0.598
334	0.369	0.611
335	0.365	0.623
336	0.363	0.636
337	0.362	0.648
338	0.359	0.659
339	0.358	0.671
340	0.357	0.681
341	0.356	0.691
342	0.355	0.699
343	0.354	0.707
344	0.351	0.714
345	0.353	0.719
346	0.352	0.724
347	0.352	0.728
348	0.351	0.731
349	0.354	0.733
350	0.354	0.734
351	0.354	0.734
352	0.356	0.733
353	0.359	0.731
354	0.361	0.728
355	0.364	0.725
356	0.367	0.721
357	0.371	0.714
358	0.375	0.709
359	0.379	0.701
360	0.383	0.693
361	0.386	0.684
362	0.387	0.674
363	0.388	0.663
364	0.388	0.651
365	0.387	0.638
366	0.383	0.624
367	0.377	0.609
368	0.37	0.595
369	0.362	0.578
370	0.351	0.562
371	0.338	0.545
372	0.324	0.528
373	0.315	0.511
374	0.302	0.494
375	0.29	0.477
376	0.28	0.46
377	0.27	0.442
378	0.262	0.425
379	0.256	0.408
380	0.25	0.392
381	0.245	0.376
382	0.239	0.359
383	0.234	0.343
384	0.229	0.326
385	0.224	0.31
386	0.219	0.293
387	0.214	0.277
388	0.21	0.261
389	0.205	0.247
390	0.2	0.231
391	0.196	0.217
392	0.191	0.203
393	0.187	0.189
394	0.182	0.176
395	0.179	0.164
396	0.174	0.153
397	0.171	0.142
398	0.166	0.133
399	0.163	0.123
400	0.159	0.115
401	0.155	0.108
402	0.152	0.101
403	0.149	0.095
404	0.145	0.089
405	0.142	0.084
406	0.138	0.08
407	0.136	0.076
408	0.133	0.072
409	0.13	0.069
410	0.127	0.066
411	0.125	0.064
412	0.122	0.062
413	0.12	0.059
414	0.117	0.057
415	0.115	0.056
416	0.113	0.054
417	0.103	0.053
418	0.101	0.051
419	0.1	0.05
420	0.098	0.049
421	0.096	0.048
422	0.094	0.047
423	0.093	0.046
424	0.09	0.044
425	0.089	0.044
426	0.088	0.043
427	0.086	0.042
428	0.085	0.041
429	0.084	0.04
430	0.083	0.039
431	0.082	0.038
432	0.081	0.038
433	0.079	0.037
434	0.077	0.036
435	0.076	0.035
436	0.075	0.035
437	0.074	0.034
438	0.073	0.033
439	0.072	0.032
440	0.07	0.032
441	0.07	0.031
442	0.068	0.03
443	0.068	0.03
444	0.067	0.029
445	0.065	0.029
446	0.064	0.028
447	0.063	0.027
448	0.062	0.027
449	0.061	0.026
450	0.06	0.026
451	0.059	0.025
452	0.057	0.024
453	0.056	0.023
454	0.056	0.023
455	0.055	0.023
456	0.055	0.022
457	0.054	0.022
458	0.053	0.021
459	0.052	0.021
460	0.051	0.02
461	0.05	0.019
462	0.049	0.019
463	0.048	0.018
464	0.048	0.018
465	0.047	0.018
466	0.046	0.017
467	0.045	0.017
468	0.043	0.016
469	0.042	0.016
470	0.041	0.016
471	0.04	0.015
472	0.039	0.015
473	0.037	0.014
474	0.037	0.014
475	0.035	0.014
476	0.035	0.014
477	0.035	0.013
478	0.034	0.013
479	0.034	0.013
480	0.033	0.012
481	0.032	0.012
482	0.032	0.012
483	0.031	0.011
484	0.031	0.011
485	0.03	0.011
486	0.03	0.01
487	0.029	0.01
488	0.029	0.01
489	0.028	0.01
490	0.028	0.009
491	0.028	0.009
492	0.027	0.009
493	0.027	0.009
494	0.027	0.008
495	0.026	0.008
496	0.026	0.008
497	0.026	0.008
498	0.025	0.007
499	0.024	0.007
500	0.024	0.007
501	0.023	0.007
502	0.023	0.007
503	0.022	0.006
504	0.022	0.006
505	0.022	0.006
506	0.021	0.006
507	0.02	0.006
508	0.02	0.006
509	0.02	0.005
510	0.02	0.005
511	0.019	0.005
512	0.018	0.005
513	0.017	0.005
514	0.017	0.005
515	0.016	0.005
516	0.016	0.004
517	0.016	0.004
518	0.015	0.004
519	0.015	0.004
520	0.015	0.004
521	0.014	0.004
522	0.014	0.004
523	0.014	0.004
524	0.014	0.003
525	0.014	0.004
526	0.013	0.004
527	0.013	0.003
528	0.012	0.003
529	0.011	0.003
530	0.011	0.003
531	0.01	0.003
532	0.01	0.003
533	0.01	0.003
534	0.01	0.003
535	0.009	0.003
536	0.009	0.003
537	0.027	0.002
538	0.026	0.002
539	0.025	0.002
540	0.025	0.002
541	0.025	0.002
542	0.024	0.002
543	0.024	0.002
544	0.024	0.002
545	0.024	0.002
546	0.023	0.002
547	0.023	0.002
548	0.022	0.002
549	0.022	0.002
550	0.021	0.002
551	0.021	0.001
552	0.021	0.001
553	0.021	0.001
554	0.02	0.001
555	0.019	0.001
556	0.02	0.001
557	0.019	0.001
558	0.019	0.001
559	0.019	0.001
560	0.019	0.001
561	0.019	0.001
562	0.018	0.001
563	0.017	0.001
564	0.017	0.001
565	0.016	0.001
566	0.015	0.001
567	0.015	0.001
568	0.015	0.001
569	0.015	0.001
570	0.015	0.001
571	0.015	0.001
572	0.015	0.001
573	0.015	0.001
574	0.015	0.001
575	0.015	0.001
576	0.015	0.001
577	0.014	0.001
578	0.015	0.001
579	0.014	0.001
580	0.014	0.001
581	0.014	0
582	0.013	0
583	0.012	0
584	0.012	0.001
585	0.012	0
586	0.012	0
587	0.012	0
588	0.012	0
589	0.012	0
590	0.012	0
591	0.011	0
592	0.011	0
593	0.011	0
594	0.011	0
595	0.01	0
596	0.01	0
597	0.009	0
598	0.009	0
599	0.009	0
600	0.009	0
601	0.009	0
602	0.009	0
603	0.008	0
604	0.008	0
605	0.008	0
606	0.008	0
607	0.007	0
608	0.007	0
609	0.008	0
610	0.007	0
611	0.007	0
612	0.006	0
613	0.006	0
614	0.006	0
615	0.006	0
616	0.006	0
617	0.005	0
618	0.005	0
619	0.005	0
620	0.004	0
621	0.004	0
622	0.004	0
623	0.003	0
624	0.003	0
625	0.003	0
626	0.003	0
627	0.003	0
628	0.004	0
629	0.003	0
630	0.003	0
631	0.003	0
632	0.003	0
633	0.003	0
634	0.002	0
635	0.002	0
636	0.002	0
637	0.002	0
638	0.002	0
639	0.001	0
640	0.001	0
641	0.001	0
642	0.001	0
643	0.001	0
644	0.001	0
645	0	0
646	0	0
647	0	0
648	0	0
649	0	0
650	0	0
651	0	0
652	-0.001	0
653	-0.001	0
654	-0.001	0
655	-0.001	0
656	-0.001	0
657	-0.002	0
658	-0.002	0
659	-0.001	0
660	-0.001	0
661	-0.002	0
662	-0.002	0
663	-0.002	0
664	-0.002	0
665	-0.002	0
666	-0.002	0
667	-0.002	0
668	-0.002	0
669	-0.002	0
670	-0.002	0
671	-0.003	0
672	-0.003	0
673	-0.004	0
674	-0.004	0
675	-0.004	0
676	-0.004	0
677	-0.004	0
678	-0.004	0
679	-0.004	0
680	-0.004	0
681	-0.004	0
682	-0.004	0
683	-0.005	0
684	-0.005	0
685	-0.005	0
686	-0.005	0
687	-0.004	0
688	-0.004	0
689	-0.004	0
690	-0.005	0
691	-0.006	0
692	-0.005	0
693	-0.005	0
694	-0.005	0
695	-0.006	0
696	-0.005	0
697	-0.006	0
698	-0.005	0
699	-0.005	0
700	-0.005	0
701	-0.005	0
702	-0.005	0
703	-0.005	0
704	-0.005	0
705	-0.006	0
706	-0.006	0
707	-0.006	0
708	-0.006	0
709	-0.006	0
710	-0.005	0
711	-0.006	0
712	-0.005	0
713	-0.005	0
714	-0.005	0
715	-0.005	0
716	-0.005	0
717	-0.005	0
718	-0.005	0
719	-0.005	0
720	-0.005	0
721	-0.005	0
722	-0.006	0
723	-0.006	0
724	-0.006	0
725	-0.005	0
726	-0.005	0
727	-0.005	0
728	-0.005	0
729	-0.005	0
730	-0.005	0
731	-0.005	0
732	-0.005	0
733	-0.006	0
734	-0.005	0
735	-0.005	0
736	-0.005	0
737	-0.005	0
738	-0.006	0
739	-0.005	0
740	-0.005	0
741	-0.005	0
742	-0.005	0
743	-0.005	0
744	-0.005	0
745	-0.005	0
746	-0.005	0
747	-0.005	0
748	-0.005	0
749	-0.005	0
750	-0.005	0
751	-0.005	0
752	-0.005	0
753	-0.005	0
754	-0.005	0
755	-0.004	0
756	-0.004	0
757	-0.004	0
758	-0.004	0
759	-0.004	0
760	-0.004	0
761	-0.001	0
762	-0.001	0
763	-0.002	0
764	-0.001	0
765	-0.001	0
766	-0.001	0
767	-0.001	0
768	-0.001	0
769	-0.001	0
770	-0.001	0
771	-0.001	0
772	-0.001	0
773	-0.001	0
774	-0.001	0
775	-0.001	0
776	-0.001	0
777	-0.001	0
778	-0.001	0
779	-0.001	0
780	-0.001	0
781	-0.001	0
782	0	0
783	-0.001	0
784	-0.001	0
785	0	0
786	0	0
787	0	0
788	0	0
789	0	0
790	0	0
791	0	0
792	0	0
793	0	0
794	0	0
795	0	0
796	0	0
797	0	0
798	0.001	0
799	0	0
800	0.001	0

## Sheet: Figure S6 (b)
	A gel
365	36
366	42
367	34
368	41
369	45
370	48
371	44
372	46
373	40
374	40
375	37
376	47
377	40
378	45
379	49
380	57
381	51
382	70
383	66
384	57
385	69
386	60
387	91
388	86
389	81
390	130
391	166
392	166
393	228
394	300
395	355
396	458
397	563
398	707
399	814
400	1039
401	1300
402	1498
403	1677
404	1887
405	2354
406	2722
407	2938
408	3281
409	3611
410	4048
411	4320
412	4813
413	5162
414	5517
415	6034
416	6277
417	6775
418	7094
419	7426
420	7801
421	8056
422	8475
423	8890
424	9114
425	9583
426	9740
427	10098
428	10313
429	10632
430	10798
431	11027
432	11347
433	11609
434	11935
435	11908
436	12158
437	12333
438	12868
439	12768
440	12840
441	12913
442	13013
443	13272
444	13344
445	13489
446	13307
447	13657
448	13489
449	13476
450	13376
451	13448
452	13457
453	13726
454	13462
455	13613
456	13186
457	13262
458	13344
459	13071
460	12992
461	12650
462	12476
463	12398
464	12379
465	12209
466	12073
467	12045
468	11701
469	11597
470	11131
471	11129
472	10900
473	10893
474	10452
475	10270
476	10037
477	9917
478	9872
479	9702
480	9402
481	9201
482	9165
483	8953
484	8603
485	8495
486	8327
487	8124
488	7869
489	7763
490	7712
491	7275
492	7113
493	6949
494	6701
495	6688
496	6487
497	6426
498	6044
499	5976
500	5657
501	5676
502	5415
503	5380
504	5147
505	4988
506	4853
507	4764
508	4772
509	4528
510	4500
511	4170
512	4072
513	3853
514	3663
515	3659
516	3575
517	3541
518	3361
519	3422
520	3178
521	3140
522	3047
523	2862
524	2826
525	2717
526	2538
527	2518
528	2510
529	2347
530	2328
531	2290
532	2196
533	2085
534	2025
535	1967
536	1941
537	1788
538	1732
539	1745
540	1696
541	1605
542	1609
543	1526
544	1458
545	1399
546	1341
547	1328
548	1278
549	1131
550	1188
551	1097
552	1091
553	1111
554	980
555	957
556	995
557	961
558	888
559	876
560	836
561	834
562	830
563	807
564	809
565	740
566	740
567	653
568	665
569	629
570	668
571	590
572	589
573	580
574	512
575	553
576	540
577	511
578	469
579	468
580	463
581	419
582	439
583	402
584	394
585	406
586	377
587	395
588	367
589	356
590	342
591	346
592	319
593	316
594	294
595	311
596	302
597	273
598	269
599	249
600	242
601	269
602	250
603	232
604	226
605	241
606	214
607	224
608	192
609	233
610	184
611	191
612	215
613	211
614	202
615	167
616	147
617	161
618	143
619	163
620	156
621	128
622	146
623	150
624	119
625	152
626	135
627	119
628	138
629	112
630	122
631	99
632	91
633	119
634	124
635	105
636	114
637	91
638	80
639	99
640	110
641	92
642	95
643	79
644	85
645	88
646	90
647	94
648	79
649	102
650	71
651	90
652	76
653	82
654	78
655	63
656	60
657	70
658	81
659	64
660	65
661	56
662	64
663	60
664	69
665	53
666	56
667	56
668	58
669	52
670	49
671	59
672	60
673	60
674	43
675	43
676	50
677	53
678	62
679	59
680	56

## Sheet: Figure S6(c)
-22.2454	0	--	--	0	0
-22.192	0	--	--	0	0
-22.1386	0	--	--	0	0
-22.0853	0	--	--	0	0
-22.0319	0	--	--	0	0
-21.9785	0	--	--	0	0
-21.9251	0	--	--	0	0
-21.8717	0	--	--	0	0
-21.8183	0	--	--	0	0
-21.7649	0	--	--	0	0
-21.7116	0	--	--	1	0
-21.6582	0	--	--	0	0
-21.6048	0	--	--	0	0
-21.5514	0	--	--	0	0
-21.498	0	--	--	0	0
-21.4446	0	--	--	0	0
-21.3912	0	--	--	0	0
-21.3378	0	--	--	0	0
-21.2845	0	--	--	0	0
-21.2311	0	--	--	0	0
-21.1777	0	--	--	0	0
-21.1243	0	--	--	0	0
-21.0709	0	--	--	0	0
-21.0175	0	--	--	0	0
-20.9641	0	--	--	0	0
-20.9108	0	--	--	0	0
-20.8574	0	--	--	0	0
-20.804	0	--	--	0	0
-20.7506	0	--	--	0	0
-20.6972	0	--	--	0	0
-20.6438	0	--	--	0	0
-20.5904	0	--	--	0	0
-20.5371	0	--	--	0	0
-20.4837	0	--	--	0	0
-20.4303	0	--	--	0	0
-20.3769	0	--	--	0	0
-20.3235	0	--	--	0	0
-20.2701	0	--	--	0	0
-20.2167	0	--	--	1	0
-20.1633	0	--	--	0	0
-20.11	0	--	--	0	0
-20.0566	0	--	--	0	0
-20.0032	0	--	--	0	0
-19.9498	0	--	--	0	0
-19.8964	0	--	--	0	0
-19.843	0	--	--	0	0
-19.7896	0	--	--	0	0
-19.7362	0	--	--	0	0
-19.6829	0	--	--	0	0
-19.6295	0	--	--	0	0
-19.5761	0	--	--	0	0
-19.5227	0	--	--	0	0
-19.4693	0	--	--	0	0
-19.4159	0	0.98064	--	0	0
-19.3625	0	--	--	0	0
-19.3091	0	--	--	1	0
-19.2558	0	--	--	0	0
-19.2024	0	--	--	0	0
-19.149	0	--	--	0	0
-19.0956	0	--	--	0	0
-19.0422	0	--	--	0	0
-18.9888	0	--	--	0	0
-18.9354	0	--	--	1	0
-18.8821	0	--	--	0	0
-18.8287	0	--	--	0	0
-18.7753	0	--	--	0	0
-18.7219	0	--	--	0	0
-18.6685	0	--	--	0	0
-18.6151	0	--	--	0	0
-18.5617	0	--	--	0	0
-18.5084	0	--	--	0	0
-18.455	0	--	--	0	0
-18.4016	0	--	--	0	0
-18.3482	0	--	--	0	0
-18.2948	0	--	--	0	0
-18.2414	0	--	--	0	0
-18.188	0	--	--	0	0
-18.1347	0	--	--	0	0
-18.0813	0	--	--	0	0
-18.0279	0	--	--	0	0
-17.9745	0	--	--	3	0
-17.9211	0	--	--	0	0
-17.8677	0	--	--	0	0
-17.8143	0	--	--	1	0
-17.7609	0	--	--	0	0
-17.7076	0	--	--	0	0
-17.6542	0	--	--	0	0
-17.6008	0	--	--	0	0
-17.5474	0	--	--	0	0
-17.494	0	--	--	0	0
-17.4406	0	--	--	0	0
-17.3872	0	--	--	2	0
-17.3338	0	--	--	0	0
-17.2805	0	--	--	0	0
-17.2271	0	--	--	0	0
-17.1737	0	--	--	0	0
-17.1203	0	--	--	0	0
-17.0669	0	--	--	0	0
-17.0135	0	--	--	0	0
-16.9601	0	--	--	0	0
-16.9067	0	--	--	0	0
-16.8534	0	--	--	0	0
-16.8	0	--	--	1	0
-16.7466	0	--	--	0	0
-16.6932	0	--	--	0	0
-16.6398	0	--	--	0	0
-16.5864	0	--	--	0	0
-16.533	0	--	--	0	0
-16.4797	0	--	--	0	0
-16.4263	0	--	--	0	0
-16.3729	0	--	--	0	0
-16.3195	0	--	--	0	0
-16.2661	0	--	--	1	0
-16.2127	0	--	--	0	0
-16.1593	0	0.98064	--	1	0
-16.1059	0	--	--	1	0
-16.0526	0	--	--	0	0
-15.9992	0	--	--	0	0
-15.9458	0	--	--	0	0
-15.8924	0	--	--	0	0
-15.839	0	--	--	0	0
-15.7856	0	--	--	0	0
-15.7322	0	--	--	1	0
-15.6789	0	--	--	0	0
-15.6255	0	--	--	1	0
-15.5721	0	--	--	0	0
-15.5187	0	--	--	0	0
-15.4653	0	--	--	0	0
-15.4119	0	--	--	0	0
-15.3585	0	--	--	0	0
-15.3051	0	--	--	0	0
-15.2518	0	--	--	0	0
-15.1984	0	--	--	0	0
-15.145	0	--	--	0	0
-15.0916	0	--	--	0	0
-15.0382	0	--	--	0	0
-14.9848	0	--	--	0	0
-14.9314	0	--	--	0	0
-14.8781	0	--	--	0	0
-14.8247	0	--	--	0	0
-14.7713	0	--	--	0	0
-14.7179	0	--	--	0	0
-14.6645	0	--	--	0	0
-14.6111	0	--	--	0	0
-14.5577	0	--	--	0	0
-14.5044	0	--	--	0	0
-14.451	0	--	--	0	0
-14.3976	0	1.96129	--	1	0
-14.3442	0	--	--	1	0
-14.2908	0	--	--	0	0
-14.2374	0	--	--	2	0
-14.184	0	--	--	0	0
-14.1306	0	--	--	0	0
-14.0772	0	--	--	0	0
-14.0239	0	--	--	0	0
-13.9705	0	--	--	1	0
-13.9171	0	--	--	1	0
-13.8637	0	--	--	1	0
-13.8103	0	--	--	0	0
-13.7569	0	--	--	0	0
-13.7035	0	--	--	0	0
-13.6502	0	--	--	1	0
-13.5968	0	--	--	0	0
-13.5434	0	--	--	0	0
-13.49	0	--	--	0	0
-13.4366	0	--	--	0	0
-13.3832	0	--	--	1	0
-13.3298	0	--	--	0	0
-13.2765	0	--	--	0	0
-13.2231	0	--	--	0	0
-13.1697	0	--	--	0	0
-13.1163	0	--	--	0	0
-13.0629	0	--	--	0	0
-13.0095	0	--	--	0	0
-12.9561	0	--	--	0	0
-12.9027	0	--	--	0	0
-12.8494	0	--	--	0	0
-12.796	0	--	--	0	0
-12.7426	0	--	--	0	0
-12.6892	0	--	--	1	0
-12.6358	0	--	--	0	0
-12.5824	0	--	--	0	0
-12.529	0	--	--	0	0
-12.4756	0	--	--	0	0
-12.4223	0	--	--	0	0
-12.3689	0	0.98064	--	0	0
-12.3155	0	--	--	0	0
-12.2621	0	--	--	0	0
-12.2087	0	--	--	0	0
-12.1553	0	--	--	0	0
-12.102	0	--	--	0	0
-12.0486	0	--	--	0	0
-11.9952	0	--	--	0	0
-11.9418	0	--	--	1	0
-11.8884	0	--	--	0	0
-11.835	0	--	--	1	0
-11.7816	0	--	--	0	0
-11.7282	0	--	--	0	0
-11.6748	0	--	--	0	0
-11.6215	0	--	--	0	0
-11.5681	0	--	--	0	0
-11.5147	0	--	--	0	0
-11.4613	0	--	--	1	0
-11.4079	0	--	--	1	0
-11.3545	0	--	--	0	0
-11.3011	0	--	--	0	0
-11.2478	0	--	--	1	0
-11.1944	0	--	--	0	0
-11.141	0	--	--	0	0
-11.0876	0	--	--	0	0
-11.0342	0	--	--	0	0
-10.9808	0	--	--	0	0
-10.9274	0	--	--	0	0
-10.8741	0	--	--	0	0
-10.8207	0	--	--	0	0
-10.7673	0	--	--	0	0
-10.7139	0	--	--	0	0
-10.6605	0	--	--	0	0
-10.6071	0	--	--	0	0
-10.5537	0	--	--	0	0
-10.5003	0	--	--	0	0
-10.447	0	--	--	0	0
-10.3936	0	--	--	0	0
-10.3402	0	--	--	0	0
-10.2868	0	--	--	0	0
-10.2334	0	--	--	1	0
-10.18	0	--	--	0	0
-10.1266	0	--	--	0	0
-10.0732	0	--	--	0	0
-10.0199	0	--	--	0	0
-9.96648	0	--	--	0	0
-9.91309	0	--	--	0	0
-9.8597	0	--	--	0	0
-9.80632	0	--	--	0	0
-9.75293	0	--	--	0	0
-9.69954	0	--	--	1	0
-9.64616	0	--	--	0	0
-9.59277	0	--	--	0	0
-9.53938	0	--	--	0	0
-9.486	0	--	--	0	0
-9.43261	0	--	--	1	0
-9.37922	0	--	--	0	0
-9.32584	0	--	--	0	0
-9.27245	0	--	--	0	0
-9.21906	0	--	--	0	0
-9.16568	0	--	--	0	0
-9.11229	0	--	--	1	0
-9.0589	0	0.98064	--	0	0
-9.00552	0	--	--	0	0
-8.95213	0	--	--	0	0
-8.89874	0	--	--	0	0
-8.84536	0	--	--	0	0
-8.79197	0	--	--	0	0
-8.73858	0	--	--	1	0
-8.6852	0	--	--	1	0
-8.63181	0	--	--	0	0
-8.57842	0	--	--	0	0
-8.52504	0	--	--	0	0
-8.47165	0	--	--	0	0
-8.41826	0	--	--	0	0
-8.36488	0	--	--	0	0
-8.31149	0	--	--	1	0
-8.2581	0	--	--	1	0
-8.20472	0	--	--	0	0
-8.15133	0	--	--	0	0
-8.09794	0	--	--	0	0
-8.04456	0	--	--	0	0
-7.99117	0	--	--	0	0
-7.93778	0	--	--	1	0
-7.88439	0	--	--	0	0
-7.83101	0	--	--	0	0
-7.77762	0	--	--	0	0
-7.72423	0	--	--	1	0
-7.67085	0	--	--	1	0
-7.61746	0	--	--	1	0
-7.56407	0	--	--	0	0
-7.51069	0	--	--	0	0
-7.4573	0	--	--	0	0
-7.40391	0	--	--	0	0
-7.35053	0	--	--	0	0
-7.29714	0	--	--	0	0
-7.24375	0	--	--	0	0
-7.19037	0	--	--	0	0
-7.13698	0	--	--	0	0
-7.08359	0	--	--	0	0
-7.03021	0	--	--	2	0
-6.97682	0	--	--	1	0
-6.92343	0	--	--	0	0
-6.87005	0	--	--	0	0
-6.81666	0	--	--	1	0
-6.76327	0	--	--	0	0
-6.70989	0	--	--	0	0
-6.6565	0	--	--	0	0
-6.60311	0	--	--	1	0
-6.54973	0	--	--	0	0
-6.49634	0	--	--	1	0
-6.44295	0	--	--	0	0
-6.38957	0	--	--	0	0
-6.33618	0	--	--	0	0
-6.28279	0	--	--	0	0
-6.22941	0	--	--	0	0
-6.17602	0	--	--	0	0
-6.12263	0	--	--	0	0
-6.06925	0	--	--	1	0
-6.01586	0	--	--	0	0
-5.96247	0	--	--	0	0
-5.90909	0	--	--	0	0
-5.8557	0	--	--	0	0
-5.80231	0	--	--	1	0
-5.74893	0	--	--	0	0
-5.69554	0	--	--	0	0
-5.64215	0	--	--	0	0
-5.58877	0	--	--	1	0
-5.53538	0	--	--	0	0
-5.48199	0	--	--	0	0
-5.42861	0	--	--	0	0
-5.37522	0	--	--	0	0
-5.32183	0	--	--	0	0
-5.26845	0	--	--	1	0
-5.21506	0	--	--	1	0
-5.16167	0	--	--	0	0
-5.10829	0	--	--	0	0
-5.0549	0	--	--	0	0
-5.00151	0	--	--	0	0
-4.94813	0	--	--	0	0
-4.89474	0	--	--	0	0
-4.84135	0	--	--	2	0
-4.78796	0	--	--	0	0
-4.73458	0	--	--	0	0
-4.68119	0	--	--	0	0
-4.6278	0	--	--	1	0
-4.57442	0	--	--	0	0
-4.52103	0	--	--	0	0
-4.46764	0	--	--	1	0
-4.41426	0	--	--	0	0
-4.36087	0	--	--	0	0
-4.30748	0	--	--	0	0
-4.2541	0	--	--	0	0
-4.20071	0	--	--	0	0
-4.14732	0	--	--	1	0
-4.09394	0	--	--	0	0
-4.04055	0	--	--	0	0
-3.98716	0	--	--	1	0
-3.93378	0	--	--	1	0
-3.88039	0	--	--	0	0
-3.827	0	--	--	0	0
-3.77362	0	--	--	0	0
-3.72023	0	--	--	0	0
-3.66684	0	--	--	0	0
-3.61346	0	--	--	0	0
-3.56007	0	--	--	0	0
-3.50668	0	--	--	0	0
-3.4533	0	--	--	0	0
-3.39991	0	--	--	0	0
-3.34652	0	--	--	0	0
-3.29314	0	0.98064	--	0	0
-3.23975	0	--	--	0	0
-3.18636	0	--	--	0	0
-3.13298	0	--	--	1	0
-3.07959	0	--	--	0	0
-3.0262	0	--	--	1	0
-2.97282	0	0.98064	--	1	0
-2.91943	0	--	--	0	0
-2.86604	0	--	--	0	0
-2.81266	0	--	--	0	0
-2.75927	0	--	--	1	0
-2.70588	0	--	--	0	0
-2.6525	0	--	--	2	0
-2.59911	0	--	--	0	0
-2.54572	0	--	--	0	0
-2.49234	0	--	--	0	0
-2.43895	0	--	--	0	0
-2.38556	0	--	--	0	0
-2.33218	0	--	--	0	0
-2.27879	0	--	--	0	0
-2.2254	0	--	--	2	0
-2.17202	1	--	--	0	0
-2.11863	0	--	--	0	0
-2.06524	0	--	--	0	0
-2.01186	0	--	--	1	0
-1.95847	0	--	--	0	0
-1.90508	0	--	--	0	0
-1.8517	0	--	--	0	0
-1.79831	0	--	--	1	0
-1.74492	0	--	--	1	0
-1.69154	0	--	--	0	0
-1.63815	0	--	--	1	0
-1.58476	0	--	--	1	0
-1.53137	0	--	--	1	0
-1.47799	0	--	--	0	0
-1.4246	0	--	--	0	0
-1.37121	0	--	--	0	0
-1.31783	0	--	--	0	0
-1.26444	0	--	--	0	0
-1.21105	0	--	--	0	0
-1.15767	0	--	--	0	0
-1.10428	0	--	--	1	1.31337
-1.05089	0	--	--	0	1.31337
-0.99751	0	--	--	0	1.31337
-0.94412	0	--	--	0	1.31337
-0.89073	0	--	--	2	1.31337
-0.83735	0	--	--	0	1.31337
-0.78396	0	--	--	1	1.31337
-0.73057	0	--	--	0	1.31337
-0.67719	0	--	--	0	1.31337
-0.6238	0	--	--	0	1.31337
-0.57041	0	0.98064	--	2	1.31337
-0.51703	0	--	--	0	1.31337
-0.46364	1	--	--	0	1.31337
-0.41025	1	--	--	0	1.31337
-0.35687	0	--	--	1	1.31337
-0.30348	3	--	--	1	1.31337
-0.25009	5	2.94193	0.06081	2	1.31337
-0.19671	25	0.98064	1.56526	2	3.57724
-0.14332	38	2.94193	4.00573	10	8.97009
-0.08993	87	6.8645	9.35499	12	19.9675
-0.03655	159	17.6516	19.1918	31	41.7886
0.01684	306	32.3612	37.4667	71	82.7325
0.07023	485	67.6644	66.1483	112	149.974
0.12361	748	104.929	109.549	213	249.956
0.177	1048	148.077	169.346	378	388.133
0.23039	1365	252.025	247.297	559	561.159
0.28377	1882	353.032	353.715	820	785.264
0.33716	2465	455.018	491.1	1094	1078.06
0.39055	3004	659.973	657.309	1482	1425.26
0.44393	3667	838.45	858.793	1939	1823.36
0.49732	4433	1015.95	1100.24	2306	2286.65
0.55071	5214	1361.13	1380.56	2858	2813.58
0.60409	5819	1709.26	1689.98	3329	3371.81
0.65748	6425	2042.68	2028.82	4020	3936.37
0.71087	7145	2297.65	2401.93	4642	4521.7
0.76425	7768	2728.15	2802.87	5042	5127.21
0.81764	8246	3217.49	3224.63	5864	5723.27
0.87103	8852	3746.06	3673.05	6353	6313.58
0.92441	9362	4063.79	4141.98	6978	6906.07
0.9778	9727	4542.34	4622	7405	7475.66
1.03119	9800	5022.85	5098.79	7958	7981.62
1.08457	9968	5443.55	5576.27	8299	8420.93
1.13796	9912	6025.07	6044.14	8873	8798.37
1.19135	10000	6490.88	6508.99	9051	9122.64
1.24473	9872	6877.25	6959.87	9220	9400.41
1.29812	9712	7214.59	7394.45	9523	9616.42
1.35151	9347	7726.49	7802.77	9757	9760.29
1.40489	8977	7903.98	8184.06	9797	9827.09
1.45828	8392	8415.88	8529.45	10000	9811.48
1.51167	8029	8788.52	8848.52	9804	9734.85
1.56505	7215	8880.71	9119.24	9422	9585.51
1.61844	6478	9144.5	9346.73	9274	9338.42
1.67183	5737	9313.17	9531.5	8944	9025.1
1.72522	4949	9290.61	9672.74	8648	8654.18
1.7786	4270	9634.82	9777.07	8228	8244.52
1.83199	3608	9529.89	9846.54	7905	7816.91
1.88538	3023	9759.36	9885.76	7349	7382.97
1.93876	2443	9585.79	9895.34	7001	6949.89
1.99215	1847	9806.43	9876.17	6425	6512.58
2.04554	1456	9716.21	9838.97	6038	6090.09
2.09892	1030	9485.76	9783.01	5592	5694.31
2.15231	757	9514.2	9717.04	5413	5328.43
2.2057	607	9439.67	9647.44	5018	5012.93
2.25908	479	9308.27	9575.48	4682	4748.37
2.31247	412	9326.9	9504.2	4543	4528.63
2.36586	368	9275.9	9434.28	4462	4349.73
2.41924	294	9091.54	9364.42	4218	4198.83
2.47263	305	9303.36	9298.26	4253	4073.84
2.52602	240	9010.15	9231.95	4024	3968.17
2.5794	234	9134.69	9168.39	3946	3874.34
2.63279	239	8924.83	9107.56	3997	3796.76
2.68618	192	8939.54	9046.92	3893	3726.21
2.73956	204	8875.8	8989.08	3725	3661.52
2.79295	175	8791.47	8931.72	3774	3603.05
2.84634	145	8820.89	8874.81	3629	3544.37
2.89972	140	8585.53	8819.52	3457	3488.24
2.95311	141	8770.87	8765.86	3463	3437.47
3.0065	114	8577.69	8712.33	3482	3388.17
3.05988	102	8613.97	8659.62	3402	3338.53
3.11327	93	8420.78	8607.77	3381	3290.71
3.16666	79	8420.78	8556.4	3281	3244.05
3.22004	62	8336.45	8505.36	3252	3197.4
3.27343	61	8199.16	8455.35	3201	3152.28
3.32682	49	8382.54	8405.83	3150	3108.91
3.3802	54	8069.71	8357.59	3148	3067.57
3.43359	59	8033.43	8310.38	3046	3029.71
3.48698	34	8134.44	8262.7	2931	2991.1
3.54036	28	8277.61	8215.54	2835	2950.8
3.59375	28	7960.86	8169.05	2913	2912.19
3.64714	11	7902.02	8122.53	2887	2873.63
3.70052	28	7998.13	8077.54	2673	2837.14
3.75391	21	7889.27	8032.76	2726	2803.37
3.8073	11	7973.61	7988.09	2793	2768.63
3.86068	13	7895.16	7944.13	2701	2734.32
3.91407	15	7790.23	7900.81	2742	2701.77
3.96746	15	7783.37	7857.97	2593	2670.37
4.02084	9	7707.86	7815.32	2479	2639.03
4.07423	12	7589.2	7773.3	2550	2608.16
4.12762	11	7605.87	7731.66	2574	2578.32
4.181	10	7741.2	7690.36	2436	2548.87
4.23439	5	7649.02	7649.22	2482	2519.36
4.28778	7	7517.61	7608.55	2402	2490.24
4.34116	3	7330.31	7568.08	2466	2461.84
4.39455	8	7271.47	7528.22	2396	2434.19
4.44794	6	7433.28	7488.64	2366	2407.17
4.50132	12	7203.81	7449.65	2360	2381.05
4.55471	4	7334.23	7410.59	2369	2355.12
4.6081	10	7061.61	7372.11	2238	2329.32
4.66148	2	7074.36	7333.53	2242	2303.93
4.71487	4	7162.62	7295.36	2299	2278.37
4.76826	6	7078.28	7257.56	2243	2253.45
4.82164	3	7054.75	7219.9	2112	2228.98
4.87503	6	7149.87	7182.67	2162	2204.91
4.92842	7	6911.57	7145.73	2135	2181.45
4.98181	4	6934.13	7108.92	2114	2158.19
5.03519	8	6989.04	7072.54	2054	2135.39
5.08858	4	6750.75	7036.19	2134	2112.88
5.14197	2	7043.96	7000	2063	2090.34
5.19535	7	6819.39	6964.3	2032	2068.41
5.24874	5	6666.41	6928.71	1990	2046.79
5.30213	1	6810.57	6893.14	2067	2025.24
5.35551	3	6729.17	6857.91	1970	2004.04
5.4089	2	6738.98	6822.87	1878	1983.18
5.46229	6	6821.35	6788.24	1841	1962.75
5.51567	4	6790.95	6753.75	1942	1942.6
5.56906	8	6603.65	6719.65	1955	1922.94
5.62245	4	6497.74	6685.56	1927	1903.49
5.67583	6	6414.39	6651.78	1863	1884.04
5.72922	6	6434.98	6618.19	1953	1865
5.78261	4	6478.13	6584.7	1786	1846.09
5.83599	4	6644.84	6551.39	1825	1827.35
5.88938	2	6449.69	6518.2	1820	1808.91
5.94277	4	6301.61	6485.31	1741	1790.75
5.99615	5	6347.7	6452.66	1694	1772.86
6.04954	5	6224.14	6420.24	1705	1755.22
6.10293	10	6329.07	6388.22	1711	1738.4
6.15631	4	6215.32	6356.09	1791	1721.67
6.2097	6	6166.28	6324.25	1670	1704.61
6.26309	6	6097.64	6292.58	1693	1687.95
6.31647	3	6086.85	6260.93	1678	1671.39
6.36986	3	6180.99	6229.44	1654	1654.98
6.42325	0	6101.56	6198.01	1708	1638.83
6.47663	3	5996.63	6166.92	1647	1622.93
6.53002	4	5941.72	6136.04	1541	1607.27
6.58341	1	6017.23	6105.18	1614	1591.83
6.63679	1	6134.9	6074.5	1502	1576.6
6.69018	1	5930.93	6044.02	1562	1561.59
6.74357	5	6017.23	6013.92	1552	1546.77
6.79695	3	5825.02	5983.9	1505	1532.15
6.85034	7	5904.45	5954.24	1469	1517.95
6.90373	5	5847.58	5924.63	1468	1503.88
6.95711	2	5771.09	5895.02	1453	1489.73
7.0105	1	5756.38	5865.53	1513	1475.78
7.06389	0	5757.36	5836.17	1496	1462.04
7.11727	3	5625.95	5807.14	1461	1448.49
7.17066	5	5673.02	5778.35	1382	1435.11
7.22405	1	5644.58	5749.53	1376	1421.92
7.27743	3	5711.27	5720.97	1422	1408.9
7.33082	1	5512.2	5692.47	1397	1396.04
7.38421	2	5613.2	5664.19	1326	1383.35
7.43759	4	5477.87	5636.15	1361	1370.82
7.49098	1	5503.37	5608.13	1341	1358.45
7.54437	3	5538.67	5580.36	1318	1346.23
7.59775	1	5512.2	5552.64	1396	1334.16
7.65114	2	5344.51	5525.14	1295	1322.25
7.70453	3	5366.08	5497.84	1281	1310.48
7.75791	2	5471.01	5470.64	1320	1298.86
7.8113	4	5303.32	5443.68	1359	1287.38
7.86469	1	5269.98	5416.71	1234	1276.04
7.91807	0	5315.09	5389.85	1330	1264.83
7.97146	1	5274.88	5363.22	1274	1253.77
8.02485	6	5168.97	5336.96	1195	1242.95
8.07823	1	5167.01	5310.59	1293	1232.23
8.13162	2	5139.55	5284.41	1213	1221.51
8.18501	1	5117.98	5258.33	1271	1210.93
8.2384	1	4959.11	5232.4	1213	1200.48
8.29178	2	5094.44	5206.67	1160	1190.17
8.34517	3	5050.31	5181.12	1141	1179.99
8.39856	1	5026.78	5155.61	1174	1169.93
8.45194	2	5057.18	5130.31	1065	1159.99
8.50533	4	4970.88	5105.24	1163	1150.17
8.55872	3	5047.37	5080.25	1142	1140.46
8.6121	2	4919.89	5055.37	1123	1130.87
8.66549	7	4852.22	5030.85	1100	1121.62
8.71888	1	4862.03	5006.16	1184	1112.42
8.77226	2	4888.51	4981.67	1154	1103.06
8.82565	4	4833.59	4957.4	1116	1093.83
8.87904	3	4860.07	4933.22	1091	1084.73
8.93242	3	4802.21	4909.16	1081	1075.75
8.98581	2	4899.29	4885.19	1131	1066.88
9.0392	3	4760.04	4861.4	1020	1058.12
9.09258	3	4689.44	4837.72	1057	1049.46
9.14597	0	4770.83	4814.03	1074	1040.91
9.19936	3	4711.01	4790.63	1072	1032.45
9.25274	4	4616.87	4767.4	1021	1024.09
9.30613	2	4625.69	4744.19	1093	1015.83
9.35952	2	4730.62	4721.1	1015	1007.66
9.4129	1	4523.71	4698.09	1034	999.574
9.46629	2	4608.04	4675.26	1012	991.582
9.51968	2	4568.82	4652.54	1002	983.679
9.57306	1	4632.56	4629.9	989	975.863
9.62645	1	4450.16	4607.37	951	968.132
9.67984	0	4545.28	4584.94	1001	960.486
9.73322	3	4567.84	4562.77	1027	952.922
9.78661	2	4417.8	4540.66	966	945.441
9.84	1	4466.83	4518.63	1021	938.04
9.89338	2	4392.3	4496.77	962	930.718
9.94677	2	4328.56	4475.03	988	923.475
10.0002	3	4382.49	4453.45	933	916.309
10.0535	1	4283.45	4431.87	925	909.22
10.1069	0	4351.11	4410.37	1011	902.205
10.1603	1	4248.15	4389.03	908	895.264
10.2137	1	4315.81	4367.82	836	888.397
10.2671	2	4242.26	4346.76	917	881.601
10.3205	1	4260.89	4325.78	892	874.876
10.3739	3	4229.51	4305	887	868.221
10.4273	2	4265.8	4284.29	848	861.635
10.4806	2	4211.86	4263.69	860	855.117
10.534	3	4205.98	4243.23	873	848.667
10.5874	1	4141.26	4222.79	918	842.282
10.6408	2	4044.17	4202.52	820	835.962
10.6942	3	4028.48	4182.38	811	829.707
10.7476	0	4123.6	4162.21	837	823.516
10.801	1	4093.2	4142.2	804	817.387
10.8543	3	4059.86	4122.4	774	811.319
10.9077	2	4025.54	4102.64	848	805.313
10.9611	0	4020.64	4082.89	842	799.366
11.0145	1	4026.52	4063.3	830	793.479
11.0679	1	3921.59	4043.81	778	787.65
11.1213	2	4039.27	4024.49	778	781.879
11.1747	3	3842.16	4005.3	774	776.165
11.228	0	3895.11	3986.06	788	770.507
11.2814	1	3886.29	3966.98	747	764.904
11.3348	1	3810.78	3947.99	738	759.356
11.3882	0	3940.22	3929.06	770	753.862
11.4416	0	3846.08	3910.23	819	748.421
11.495	2	3852.95	3891.62	775	743.033
11.5484	3	3849.02	3873.14	748	737.697
11.6018	1	3816.66	3854.66	738	732.411
11.6552	2	3824.51	3836.32	755	727.176
11.7085	2	3714.68	3818.09	788	721.991
11.7619	2	3813.72	3799.94	730	716.855
11.8153	1	3727.42	3781.83	747	711.767
11.8687	0	3689.18	3763.77	727	706.728
11.9221	1	3688.2	3745.85	721	701.735
11.9755	1	3579.35	3728.03	717	696.79
12.0289	1	3691.14	3710.31	724	691.89
12.0822	1	3605.83	3692.67	713	687.036
12.1356	0	3631.32	3675.08	704	682.227
12.189	2	3581.31	3657.68	711	677.462
12.2424	0	3623.48	3640.27	663	672.741
12.2958	1	3625.44	3623.01	684	668.063
12.3492	2	3463.63	3605.88	681	663.427
12.4026	0	3434.21	3588.74	677	658.834
12.4559	1	3530.32	3571.74	678	654.283
12.5093	2	3508.74	3554.89	664	649.772
12.5627	2	3452.84	3538.12	654	645.302
12.6161	1	3357.72	3521.39	659	640.873
12.6695	2	3568.56	3504.8	644	636.482
12.7229	3	3426.37	3488.33	643	632.131
12.7763	0	3397.93	3471.8	662	627.819
12.8297	1	3276.33	3455.41	660	623.544
12.883	2	3386.16	3439.14	620	619.308
12.9364	0	3385.18	3422.88	627	615.108
12.9898	4	3276.33	3406.89	615	610.945
13.0432	1	3326.34	3390.83	613	606.819
13.0966	0	3313.59	3374.8	577	602.729
13.15	1	3189.05	3358.9	667	598.673
13.2034	1	3356.74	3343.08	589	594.653
13.2568	0	3215.53	3327.3	619	590.668
13.3101	1	3343.01	3311.66	649	586.717
13.3635	2	3179.25	3296.13	593	582.799
13.4169	0	3263.58	3280.59	571	578.915
13.4703	1	3162.57	3265.18	612	575.064
13.5237	0	3194.94	3249.79	598	571.245
13.5771	0	3218.47	3234.48	543	567.459
13.6304	0	3200.82	3219.25	570	563.705
13.6838	0	3060.59	3204.11	576	559.982
13.7372	1	3092.95	3189.09	565	556.29
13.7906	0	3159.63	3174.11	536	552.629
13.844	2	3095.89	3159.3	569	548.998
13.8974	0	3125.31	3144.46	514	545.398
13.9508	0	3061.57	3129.69	574	541.827
14.0042	0	2997.83	3115.01	498	538.285
14.0576	2	3022.34	3100.5	523	534.773
14.1109	0	3063.53	3085.96	532	531.289
14.1643	0	3084.12	3071.5	519	527.834
14.2177	2	3018.42	3057.21	509	524.407
14.2711	0	3065.49	3042.89	566	521.007
14.3245	0	2998.81	3028.64	509	517.635
14.3779	0	2947.81	3014.47	512	514.29
14.4313	0	2867.4	3000.37	535	510.972
14.4846	1	2842.88	2986.41	517	507.681
14.538	2	2959.58	2972.55	527	504.415
14.5914	0	2881.13	2958.66	546	501.176
14.6448	1	2820.33	2944.91	503	497.962
14.6982	2	2944.87	2931.26	484	494.774
14.7516	0	2854.65	2917.57	486	491.611
14.805	0	2989	2903.97	504	488.473
14.8583	1	2817.39	2890.48	449	485.359
14.9117	1	2695.79	2877.06	467	482.27
14.9651	1	2771.3	2863.71	479	479.204
15.0185	1	2854.65	2850.42	444	476.163
15.0719	1	2804.64	2837.2	403	473.145
15.1253	0	2863.48	2824	461	470.15
15.1787	2	2761.49	2810.96	481	467.179
15.2321	0	2770.32	2797.88	457	464.23
15.2854	0	2732.07	2784.88	469	461.304
15.3388	2	2638.91	2772.05	442	458.4
15.3922	2	2755.61	2759.28	449	455.519
15.4456	1	2717.36	2746.51	477	452.659
15.499	0	2646.76	2733.75	477	449.821
15.5524	0	2634.99	2721.07	445	447.004
15.6058	1	2694.81	2708.5	444	444.208
15.6592	1	2653.62	2695.98	456	441.434
15.7125	0	2703.63	2683.49	452	438.68
15.7659	1	2606.55	2671.11	420	435.947
15.8193	2	2672.25	2658.84	441	433.234
15.8727	0	2572.23	2646.53	418	430.542
15.9261	1	2519.27	2634.32	418	427.869
15.9795	0	2635.97	2622.15	433	425.216
16.0329	3	2538.89	2610.17	408	422.583
16.0862	0	2633.03	2598.1	407	419.969
16.1396	1	2650.68	2586.14	444	417.374
16.193	0	2576.15	2574.19	411	414.798
16.2464	1	2573.21	2562.35	396	412.241
16.2998	1	2511.43	2550.56	421	409.703
16.3532	0	2497.7	2538.79	423	407.183
16.4066	0	2501.62	2527.07	398	404.681
16.4599	0	2388.85	2515.41	393	402.197
16.5133	0	2446.7	2503.81	406	399.732
16.5667	0	2510.45	2492.27	386	397.284
16.6201	1	2424.15	2480.85	399	394.853
16.6735	2	2514.37	2469.52	372	392.44
16.7269	0	2386.89	2458.15	405	390.044
16.7803	1	2432.98	2446.89	389	387.666
16.8337	0	2424.15	2435.64	397	385.304
16.887	2	2330.01	2424.54	373	382.959
16.9404	0	2407.48	2413.39	385	380.63
16.9938	1	2324.12	2402.34	341	378.318
17.0472	0	2316.28	2391.3	427	376.022
17.1006	0	2400.61	2380.32	345	373.743
17.154	1	2229	2369.44	369	371.479
17.2074	1	2281.96	2358.61	388	369.231
17.2608	0	2370.21	2347.8	337	366.999
17.3141	2	2338.83	2337.13	363	364.783
17.3675	1	2253.52	2326.46	378	362.581
17.4209	0	2161.34	2315.79	383	360.395
17.4743	0	2240.77	2305.18	349	358.225
17.5277	0	2177.03	2294.61	372	356.069
17.5811	0	2181.93	2284.11	353	353.928
17.6345	2	2213.31	2273.76	328	351.802
17.6878	1	2252.54	2263.4	393	349.69
17.7412	0	2180.95	2253.05	300	347.593
17.7946	2	2183.89	2242.85	379	345.51
17.848	0	2175.07	2232.59	345	343.441
17.9014	1	2207.43	2222.44	350	341.387
17.9548	1	2229	2212.33	365	339.346
18.0082	0	2164.28	2202.23	315	337.319
18.0616	1	2189.78	2192.22	340	335.306
18.1149	0	2221.16	2182.21	351	333.307
18.1683	1	2160.36	2172.3	358	331.321
18.2217	0	2152.51	2162.38	349	329.348
18.2751	0	2173.11	2152.52	319	327.389
18.3285	1	2108.38	2142.76	325	325.443
18.3819	0	2092.69	2132.99	348	323.509
18.4353	1	2001.49	2123.32	309	321.589
18.4886	0	2072.1	2113.65	323	319.682
18.542	1	1987.76	2104.07	324	317.787
18.5954	0	2082.89	2094.5	328	315.905
18.6488	1	2018.16	2085.01	316	314.035
18.7022	0	2015.22	2075.53	306	312.177
18.7556	1	1985.8	2066.14	318	310.332
18.809	0	1990.71	2056.75	304	308.499
18.8623	1	1983.84	2047.44	303	306.679
18.9157	0	1999.53	2038.14	297	304.87
18.9691	0	1941.67	2028.89	279	303.073
19.0225	2	1933.83	2019.78	280	301.287
19.0759	1	1899.51	2010.66	271	299.514
19.1293	0	1946.58	2001.53	296	297.752
19.1827	1	1969.13	1992.5	265	296.001
19.2361	0	2005.42	1983.45	281	294.262
19.2894	0	1976	1974.45	254	292.534
19.3428	0	1957.36	1965.51	290	290.818
19.3962	1	1960.31	1956.65	279	289.112
19.4496	0	1947.56	1947.78	284	287.418
19.503	0	1922.06	1938.95	266	285.734
19.5564	0	1898.53	1930.18	292	284.061
19.6098	1	1871.07	1921.49	264	282.399
19.6632	1	1851.45	1912.85	258	280.748
19.7165	1	1872.05	1904.26	255	279.107
19.7699	2	1819.09	1895.74	270	277.477
19.8233	0	1893.62	1887.16	274	275.858
19.8767	0	1824.98	1878.63	259	274.248
19.9301	0	1903.43	1870.13	244	272.649
19.9835	0	1963.25	1861.69	264	271.06
20.0369	1	1810.27	1853.33	265	269.482
20.0903	0	1824.98	1844.95	304	267.913
20.1436	0	1722.01	1836.62	250	266.354
20.197	0	1825.96	1828.33	262	264.805
20.2504	0	1814.19	1820.08	256	263.266
20.3038	1	1770.06	1811.92	236	261.737
20.3572	0	1770.06	1803.75	259	260.217
20.4106	0	1775.94	1795.62	246	258.707
20.464	1	1755.35	1787.58	256	257.206
20.5173	0	1770.06	1779.53	229	255.715
20.5707	1	1665.13	1771.56	260	254.233
20.6241	0	1669.05	1763.58	226	252.76
20.6775	0	1719.07	1755.64	246	251.297
20.7309	0	1784.77	1747.73	244	249.843
20.7843	0	1764.18	1739.88	283	248.398
20.8377	1	1692.59	1732.1	224	246.962
20.891	0	1698.47	1724.31	216	245.535
20.9444	0	1765.16	1716.55	268	244.116
20.9978	0	1669.05	1708.83	234	242.707
21.0512	0	1677.88	1701.15	254	241.306
21.1046	0	1635.71	1693.51	185	239.914
21.158	0	1637.67	1685.9	212	238.531
21.2114	0	1680.82	1678.33	240	237.156
21.2648	0	1659.25	1670.8	233	235.79
21.3181	0	1668.07	1663.3	265	234.432
21.3715	0	1637.67	1655.84	226	233.082
21.4249	1	1673.96	1648.46	230	231.741
21.4783	0	1606.29	1641.07	223	230.408
21.5317	0	1657.29	1633.71	220	229.084
21.5851	0	1662.19	1626.4	221	227.767
21.6385	1	1649.44	1619.16	218	226.459
21.6918	1	1576.87	1611.97	232	225.158
21.7452	1	1543.53	1604.81	206	223.866
21.7986	3	1564.13	1597.78	180	222.581
21.852	0	1619.04	1590.63	225	221.304
21.9054	1	1557.26	1583.55	217	220.035
21.9588	0	1487.64	1576.46	227	218.774
22.0122	0	1539.61	1569.41	210	217.521
22.0656	1	1479.79	1562.44	204	216.275
22.1189	0	1562.16	1555.44	232	215.036
22.1723	0	1506.27	1548.49	231	213.806
22.2257	1	1541.57	1541.62	193	212.582
22.2791	0	1528.82	1534.73	201	211.366
22.3325	0	1530.78	1527.87	227	210.158
22.3859	0	1522.94	1521.04	209	208.957
22.4393	0	1536.67	1514.25	204	207.763
22.4927	1	1478.81	1507.54	224	206.576
22.546	0	1468.02	1500.81	187	205.396
22.5994	1	1523.92	1494.16	185	204.224
22.6528	0	1353.29	1487.5	192	203.059
22.7062	1	1484.69	1480.92	198	201.9
22.7596	1	1471.95	1474.37	196	200.749
22.813	0	1433.7	1467.79	184	199.604
22.8664	0	1446.45	1461.25	186	198.467
22.9197	2	1392.51	1454.84	213	197.336
22.9731	0	1418.01	1448.35	215	196.212
23.0265	0	1381.73	1441.9	213	195.095
23.0799	0	1445.47	1435.48	198	193.984
23.1333	1	1432.72	1429.14	198	192.881
23.1867	0	1348.38	1422.77	196	191.783
23.2401	0	1358.19	1416.44	174	190.693
23.2934	0	1362.11	1410.13	180	189.608
23.3468	0	1429.78	1403.86	157	188.531
23.4002	0	1388.59	1397.61	189	187.459
23.4536	0	1396.44	1391.39	199	186.394
23.507	0	1369.96	1385.21	206	185.336
23.5604	1	1332.69	1379.11	171	184.283
23.6138	0	1354.27	1372.98	161	183.237
23.6672	0	1326.81	1366.87	185	182.198
23.7205	0	1341.52	1360.81	180	181.164
23.7739	1	1349.37	1354.81	187	180.137
23.8273	0	1284.64	1348.8	178	179.115
23.8807	0	1369.96	1342.81	200	178.1
23.9341	0	1314.06	1336.85	166	177.09
23.9875	1	1347.4	1330.97	155	176.087
24.0409	0	1307.2	1325.07	184	175.09
24.0942	0	1312.1	1319.19	159	174.098
24.1476	0	1218.94	1313.34	159	173.112
24.201	1	1337.6	1307.58	161	172.133
24.2544	1	1325.83	1301.83	166	171.158
24.3078	0	1330.73	1296.07	190	170.19
24.3612	2	1275.82	1290.43	164	169.228
24.4146	0	1303.27	1284.71	167	168.271
24.468	0	1296.41	1279.01	185	167.319
24.5214	0	1240.51	1273.35	171	166.374
24.5747	1	1213.06	1267.77	175	165.433
24.6281	1	1274.84	1262.21	141	164.499
24.6815	0	1146.37	1256.62	170	163.57
24.7349	0	1204.23	1251.05	160	162.646
24.7883	0	1275.82	1245.52	181	161.728
24.8417	0	1268.95	1240	157	160.815
24.8951	0	1250.32	1234.52	150	159.907
24.9484	0	1234.63	1229.06	148	159.005
25.0018	1	1146.37	1223.68	131	158.108
25.0552	0	1193.44	1218.27	155	157.216
25.1086	0	1198.35	1212.89	144	156.33
25.162	1	1151.28	1207.58	146	155.449
25.2154	0	1180.69	1202.25	136	154.573
25.2688	0	1128.72	1196.94	160	153.702
25.3222	0	1203.25	1191.65	158	152.836
25.3755	0	1193.44	1186.39	147	151.975
25.4289	0	1157.16	1181.15	142	151.119
25.4823	0	1141.47	1175.94	140	150.268
25.5357	0	1080.67	1170.75	167	149.422
25.5891	0	1127.74	1165.58	133	148.581
25.6425	0	1202.27	1160.44	153	147.745
25.6959	0	1139.51	1155.32	145	146.914
25.7492	0	1165.98	1150.23	132	146.087
25.8026	0	1089.49	1145.17	148	145.266
25.856	1	1138.53	1140.17	155	144.449
25.9094	0	1099.3	1135.15	128	143.637
25.9628	0	1088.51	1130.15	127	142.83
26.0162	1	1121.86	1125.22	152	142.027
26.0696	0	1097.34	1120.27	159	141.229
26.1229	0	1106.17	1115.33	158	140.436
26.1763	0	1060.08	1110.43	145	139.647
26.2297	1	1072.82	1105.59	140	138.863
26.2831	0	1128.72	1100.73	140	138.083
26.3365	1	1047.33	1095.94	130	137.308
26.3899	0	1055.17	1091.12	157	136.537
26.4433	1	1078.71	1086.37	130	135.771
26.4966	0	1061.06	1081.59	139	135.009
26.55	0	1050.27	1076.83	129	134.252
26.6034	0	1107.15	1072.1	130	133.499
26.6568	0	1022.81	1067.38	128	132.75
26.7102	0	1032.62	1062.69	151	132.006
26.7636	0	1065.96	1058.02	118	131.266
26.817	0	1071.84	1053.37	172	130.53
26.8704	0	1002.22	1048.74	119	129.799
26.9237	0	1003.2	1044.14	141	129.071
26.9771	0	1034.58	1039.55	127	128.348
27.0305	0	1027.71	1034.99	118	127.629
27.0839	0	981.624	1030.44	131	126.915
27.1373	0	1027.71	1025.92	124	126.204
27.1907	0	1044.39	1021.42	136	125.497
27.2441	0	978.682	1016.94	137	124.795
27.2975	0	998.295	1012.48	131	124.096
27.3508	0	999.275	1008.04	116	123.402
27.4042	0	1027.71	1003.62	124	122.711
27.4576	0	1006.14	999.217	130	122.025
27.511	0	996.334	994.838	124	121.342
27.5644	0	947.301	990.478	142	120.664
27.6178	0	951.224	986.144	129	119.989
27.6712	1	978.682	981.875	116	119.318
27.7246	0	929.65	977.573	117	118.651
27.7779	0	944.359	973.291	135	117.988
27.8313	0	934.553	969.028	116	117.329
27.8847	0	886.501	964.791	115	116.673
27.9381	1	995.353	960.619	105	116.021
27.9915	0	974.759	956.413	122	115.373
28.0449	0	978.682	952.226	102	114.729
28.0983	0	907.095	948.058	107	114.088
28.1516	0	922.785	943.922	101	113.451
28.205	2	892.385	939.895	103	112.818
28.2584	0	957.108	935.781	112	112.188
28.3118	0	957.108	931.686	95	111.562
28.3652	0	917.882	927.61	99	110.94
28.4186	0	937.495	923.559	128	110.321
28.472	1	920.824	919.571	114	109.705
28.5253	0	945.34	915.55	111	109.093
28.5787	0	889.443	911.547	105	108.485
28.6321	0	935.534	907.562	103	107.88
28.6855	0	900.23	903.595	116	107.279
28.7389	0	865.908	899.665	104	106.681
28.7923	3	891.405	895.889	104	106.086
28.8457	0	912.979	891.978	115	105.495
28.8991	1	880.618	888.131	110	104.907
28.9524	0	886.501	884.249	107	104.322
29.0058	0	835.508	880.385	106	103.741
29.0592	0	855.121	876.539	98	103.163
29.1126	0	815.895	872.717	85	102.589
29.166	1	865.908	868.957	82	102.018
29.2194	0	867.869	865.169	109	101.45
29.2728	1	810.992	861.443	94	100.885
29.3261	0	833.547	857.682	93	100.323
29.3795	0	829.624	853.938	101	99.7649
29.4329	0	857.082	850.217	113	99.2098
29.4863	1	823.74	846.559	90	98.6578
29.5397	0	846.295	842.865	93	98.1089
29.5931	0	756.076	839.188	95	97.5632
29.6465	0	860.024	835.528	80	97.0206
29.6999	0	814.915	831.885	92	96.481
29.7532	0	807.069	828.259	91	95.9446
29.8066	0	794.321	824.649	101	95.4112
29.86	0	812.953	821.055	99	94.8808
29.9134	0	751.173	817.478	102	94.3534
29.9668	0	784.515	813.917	89	93.8291
30.0202	0	760.979	810.372	90	93.3077
30.0736	0	792.36	806.844	99	92.7893
30.127	0	790.398	803.331	76	92.2738
30.1803	0	805.108	799.834	103	91.7613
30.2337	0	748.231	796.353	104	91.2517
30.2871	0	764.902	792.888	89	90.745
30.3405	0	784.515	789.438	88	90.2412
30.3939	0	782.553	786.004	88	89.7402
30.4473	0	762.94	782.585	86	89.2421
30.5007	0	793.34	779.182	85	88.7467
30.554	0	771.766	775.794	96	88.2543
30.6074	0	750.192	772.421	104	87.7646
30.6608	0	770.786	769.064	87	87.2776
30.7142	0	697.237	765.721	81	86.7935
30.7676	0	774.708	762.394	87	86.3121
30.821	0	753.134	759.081	86	85.8334
30.8744	0	735.482	755.783	73	85.3575
30.9277	0	724.695	752.519	78	84.8842
30.9811	3	692.334	749.404	71	84.4137
31.0345	0	705.082	746.146	81	83.9458
31.0879	0	772.747	742.903	96	83.4805
31.1413	0	696.257	739.675	80	83.0179
31.1947	0	675.663	736.467	92	82.5579
31.2481	1	715.87	733.319	91	82.1005
31.3015	0	763.921	730.133	92	81.6458
31.3548	0	682.528	726.968	82	81.1936
31.4082	1	725.676	723.862	82	80.7439
31.4616	0	688.412	720.718	80	80.2968
31.515	0	714.889	717.588	72	79.8522
31.5684	0	669.779	714.473	81	79.4102
31.6218	0	694.295	711.371	89	78.9707
31.6752	0	713.908	708.29	56	78.5336
31.7285	1	723.715	705.268	73	78.099
31.7819	0	687.431	702.207	77	77.6669
31.8353	0	661.934	699.167	87	77.2372
31.8887	1	738.424	696.185	73	76.81
31.9421	0	702.141	693.164	86	76.3852
31.9955	0	698.218	690.157	82	75.9628
32.0489	0	691.353	687.17	79	75.5427
32.1023	1	668.799	684.247	93	75.1251
32.1557	1	685.47	681.331	72	74.7098
32.209	0	662.915	678.375	72	74.2969
32.2624	0	658.992	675.433	81	73.8863
32.3158	0	654.089	672.504	68	73.478
32.3692	0	688.412	669.589	84	73.072
32.4226	0	657.031	666.687	80	72.6684
32.476	0	671.741	663.798	66	72.267
32.5294	0	599.173	660.928	82	71.8678
32.5827	1	660.954	658.117	68	71.471
32.6361	0	694.295	655.265	73	71.0764
32.6895	0	651.147	652.427	75	70.684
32.7429	0	614.863	649.601	70	70.2938
32.7963	0	663.895	646.788	75	69.9058
32.8497	0	631.534	643.988	76	69.5201
32.9031	0	604.076	641.2	71	69.1365
32.9564	0	635.457	638.425	65	68.755
33.0098	0	633.496	635.662	68	68.3758
33.0632	0	625.65	632.912	72	67.9986
33.1166	0	584.463	630.174	74	67.6236
33.17	0	603.096	627.449	70	67.2507
33.2234	0	596.231	624.735	56	66.88
33.2768	0	619.767	622.034	59	66.5113
33.3302	0	640.36	619.344	80	66.1447
33.3835	0	597.212	616.667	72	65.7802
33.4369	0	616.825	614.001	67	65.4177
33.4903	0	587.405	611.348	72	65.0573
33.5437	0	644.283	608.706	65	64.6989
33.5971	0	607.999	606.076	77	64.3425
33.6505	0	585.444	603.457	72	63.9881
33.7039	0	584.463	600.856	65	63.6358
33.7572	1	565.831	598.312	74	63.2854
33.8106	0	582.502	595.727	51	62.937
33.864	0	590.347	593.153	40	62.5906
33.9174	0	582.502	590.591	58	62.2462
33.9708	0	560.928	588.041	55	61.9036
34.0242	0	540.334	585.501	67	61.563
34.0776	0	558.967	582.973	59	61.2244
34.131	0	581.521	580.456	45	60.8876
34.1843	0	555.044	577.95	40	60.5527
34.2377	0	587.405	575.456	55	60.2198
34.2911	0	582.502	572.972	60	59.8887
34.3445	0	547.199	570.5	61	59.5594
34.3979	0	587.405	568.038	48	59.2321
34.4513	0	555.044	565.588	49	58.9065
34.5047	0	544.257	563.148	68	58.5829
34.5581	0	517.78	560.719	66	58.261
34.6114	0	548.18	558.3	54	57.9409
34.6648	0	561.909	555.893	51	57.6227
34.7182	0	527.586	553.502	72	57.3062
34.7716	1	504.051	551.173	40	56.9916
34.825	1	552.102	548.847	51	56.6787
34.8784	0	545.238	546.479	61	56.3675
34.9318	0	530.528	544.121	62	56.0582
34.9851	0	543.276	541.774	61	55.7505
35.0385	0	501.109	539.444	54	55.4446
35.0919	1	492.283	537.169	47	55.1405
35.1453	0	521.702	534.852	66	54.838
35.1987	0	480.515	532.546	65	54.5372
35.2521	0	491.302	530.255	55	54.2382
35.3055	1	503.07	528.027	56	53.9408
35.3588	1	531.509	525.801	59	53.6451
35.4122	0	493.264	523.533	51	53.351
35.4656	0	512.876	521.281	48	53.0587
35.519	1	494.244	519.084	62	52.7679
35.5724	0	504.051	516.845	48	52.4788
35.6258	0	474.631	514.616	46	52.1914
35.6792	0	543.276	512.397	52	51.9055
35.7326	0	506.993	510.189	60	51.6213
35.7859	0	508.954	507.99	65	51.3386
35.8393	0	516.799	505.801	50	51.0576
35.8927	0	489.341	503.622	53	50.7781
35.9461	0	514.838	501.453	59	50.5002
35.9995	0	482.476	499.293	37	50.2239
36.0529	0	466.786	497.149	58	49.9491
36.1063	1	477.573	495.06	52	49.6759
36.1596	0	487.38	492.928	49	49.4042
36.213	0	496.205	490.805	51	49.1341
36.2664	0	475.612	488.698	56	48.8654
36.3198	1	447.173	486.646	51	48.5983
36.3732	0	465.806	484.556	56	48.3327
36.4266	1	482.476	482.521	46	48.0686
36.48	0	470.709	480.442	54	47.8059
36.5334	0	513.857	478.373	36	47.5448
36.5867	0	481.496	476.314	37	47.2851
36.6401	0	465.806	474.263	58	47.0269
36.6935	0	479.535	472.222	55	46.7701
36.7469	0	420.696	470.196	38	46.5148
36.8003	1	450.115	468.225	53	46.2609
36.8537	0	462.864	466.209	47	46.0084
36.9071	0	502.089	464.203	47	45.7574
36.9605	0	469.728	462.206	34	45.5077
37.0138	0	476.593	460.224	48	45.2595
37.0672	1	445.212	458.295	39	45.0127
37.1206	0	456.98	456.323	38	44.7672
37.174	0	472.67	454.36	48	44.5232
37.2274	0	430.502	452.406	56	44.2805
37.2808	0	437.367	450.46	48	44.0392
37.3342	0	447.173	448.524	31	43.7992
37.3875	0	453.057	446.595	50	43.5606
37.4409	0	453.057	444.676	49	43.3233
37.4943	0	446.193	442.765	51	43.0874
37.5477	0	445.212	440.862	37	42.8528
37.6011	0	440.309	438.974	55	42.6195
37.6545	1	441.289	437.139	58	42.3875
37.7079	0	424.619	435.26	43	42.1568
37.7612	0	398.141	433.402	37	41.9275
37.8146	2	427.56	431.643	43	41.6994
37.868	0	396.18	429.786	45	41.4726
37.9214	0	423.638	427.938	28	41.2471
37.9748	0	439.328	426.098	45	41.0228
38.0282	0	400.102	424.272	54	40.7998
38.0816	1	394.219	422.506	55	40.5781
38.135	1	424.619	420.741	30	40.3576
38.1883	0	402.064	418.938	49	40.1383
38.2417	1	400.102	417.187	39	39.9203
38.2951	0	405.006	415.393	42	39.7035
38.3485	0	401.083	413.606	47	39.4879
38.4019	0	406.967	411.828	33	39.2735
38.4553	0	431.483	410.058	40	39.0604
38.5087	0	415.793	408.296	32	38.8484
38.562	0	431.483	406.542	44	38.6377
38.6154	0	376.567	404.795	38	38.4281
38.6688	0	402.064	403.057	38	38.2197
38.7222	0	361.857	401.326	43	38.0124
38.7756	0	348.128	399.603	34	37.8064
38.829	0	398.141	397.888	51	37.6014
38.8824	0	362.838	396.187	34	37.3977
38.9358	1	415.793	394.538	41	37.1951
38.9892	0	380.49	392.844	39	36.9936
39.0425	0	389.315	391.158	46	36.7933
39.0959	0	374.606	389.479	39	36.594
39.1493	0	348.128	387.808	35	36.3959
39.2027	0	376.567	386.144	26	36.199
39.2561	0	365.78	384.487	33	36.0031
39.3095	0	373.625	382.838	39	35.8083
39.3629	0	387.354	381.203	24	35.6146
39.4162	1	384.412	379.619	37	35.422
39.4696	0	384.412	377.99	42	35.2305
39.523	0	359.896	376.369	33	35.0401
39.5764	0	367.741	374.754	45	34.8507
39.6298	0	369.702	373.147	34	34.6624
39.6832	0	348.128	371.547	28	34.4752
39.7366	0	375.586	369.954	33	34.289
39.7899	0	344.206	368.368	36	34.1039
39.8433	0	347.148	366.79	30	33.9197
39.8967	0	324.593	365.218	45	33.7367
39.9501	0	352.051	363.653	34	33.5546
40.0035	0	333.419	362.094	39	33.3736
40.0569	0	367.741	360.543	35	33.1936
40.1103	0	327.535	358.999	35	33.0146
40.1636	0	359.896	357.467	47	32.8367
40.217	1	337.341	355.987	33	32.6597
40.2704	0	338.322	354.468	35	32.4837
40.3238	1	377.548	353	30	32.3087
40.3772	0	320.67	351.486	34	32.1347
40.4306	0	358.915	349.979	32	31.9616
40.484	0	369.702	348.479	31	31.7896
40.5374	0	333.419	346.986	37	31.6185
40.5907	0	364.799	345.499	35	31.4483
40.6441	0	361.857	344.025	37	31.2792
40.6975	1	309.883	342.608	30	31.1109
40.7509	1	342.244	341.191	31	30.9437
40.8043	0	344.206	339.728	37	30.7773
40.8577	0	307.922	338.271	27	30.6119
40.9111	0	361.857	336.827	30	30.4474
40.9645	1	372.644	335.434	25	30.2839
41.0178	0	323.612	333.996	39	30.1212
41.0712	0	329.496	332.564	29	29.9595
41.1246	0	298.116	331.138	34	29.7987
41.178	0	296.154	329.719	35	29.6388
41.2314	0	301.057	328.306	24	29.4797
41.2848	0	279.483	326.9	28	29.3216
41.3382	0	324.593	325.499	29	29.1644
41.3916	0	300.077	324.105	28	29.0081
41.4449	0	331.457	322.718	37	28.8526
41.4983	0	332.438	321.342	39	28.698
41.5517	1	304.98	320.018	24	28.5443
41.6051	0	310.864	318.647	15	28.3914
41.6585	0	337.341	317.282	28	28.2394
41.7119	0	303.019	315.924	27	28.0882
41.7653	0	342.244	314.571	32	27.9379
41.8186	0	301.057	313.224	39	27.7885
41.872	0	304.98	311.884	34	27.6398
41.9254	0	311.845	310.549	40	27.492
41.9788	0	319.69	309.22	27	27.3451
42.0322	0	301.057	307.897	25	27.199
42.0856	0	299.096	306.58	26	27.0537
42.139	0	294.193	305.269	28	26.9092
42.1923	0	310.864	303.963	31	26.7655
42.2457	0	278.503	302.669	33	26.6226
42.2991	1	278.503	301.426	20	26.4805
42.3525	0	268.696	300.143	34	26.3392
42.4059	1	280.464	298.91	27	26.1988
42.4593	0	264.774	297.63	33	26.0591
42.5127	0	262.812	296.355	24	25.9202
42.5661	0	291.251	295.087	34	25.782
42.6194	0	303.019	293.824	18	25.6447
42.6728	0	257.909	292.567	27	25.5081
42.7262	0	271.638	291.315	28	25.3723
42.7796	0	292.232	290.069	25	25.2372
42.833	0	269.677	288.828	22	25.1029
42.8864	0	288.309	287.593	24	24.9694
42.9398	0	253.987	286.363	28	24.8366
42.9931	0	291.251	285.139	33	24.7046
43.0465	0	291.251	283.92	34	24.5733
43.0999	0	278.503	282.707	34	24.4427
43.1533	0	253.987	281.498	22	24.3129
43.2067	0	296.154	280.295	26	24.1838
43.2601	0	293.212	279.104	24	24.0554
43.3135	1	268.696	277.962	25	23.9278
43.3669	0	257.909	276.774	25	23.8008
43.4202	0	285.367	275.596	23	23.6746
43.4736	1	285.367	274.469	34	23.5491
43.527	0	283.406	273.295	27	23.4243
43.5804	0	268.696	272.126	25	23.3001
43.6338	0	292.232	270.962	21	23.1767
43.6872	0	279.483	269.803	39	23.054
43.7406	0	282.425	268.649	32	22.932
43.794	0	238.296	267.501	18	22.8106
43.8473	0	245.161	266.357	21	22.69
43.9007	0	278.503	265.219	23	22.57
43.9541	0	258.89	264.086	32	22.4507
44.0075	0	225.548	262.957	30	22.332
44.0609	0	265.754	261.84	30	22.214
44.1143	1	253.006	260.773	19	22.0967
44.1677	0	245.161	259.658	20	21.9801
44.221	0	250.064	258.548	27	21.8641
44.2744	0	270.658	257.442	19	21.7487
44.3278	0	226.529	256.342	24	21.634
44.3812	0	274.58	255.247	21	21.52
44.4346	0	261.832	254.156	23	21.4065
44.488	0	262.812	253.077	25	21.2937
44.5414	1	257.909	252.047	18	21.1816
44.5947	0	229.471	250.969	25	21.0701
44.6481	0	221.625	249.896	28	20.9592
44.7015	0	258.89	248.828	20	20.8489
44.7549	0	285.367	247.771	21	20.7393
44.8083	1	236.335	246.764	22	20.6302
44.8617	0	252.025	245.708	28	20.5218
44.9151	0	263.793	244.658	12	20.414
44.9685	0	229.471	243.618	20	20.3068
45.0219	1	223.587	242.628	16	20.2002
45.0752	0	229.471	241.59	19	20.0942
45.1286	0	231.432	240.563	30	19.9888
45.182	1	234.374	239.586	20	19.8839
45.2354	0	218.683	238.56	24	19.7797
45.2888	0	247.122	237.54	23	19.6761
45.3422	0	238.296	236.524	12	19.573
45.3956	0	276.541	235.512	18	19.4705
45.4489	0	232.412	234.505	17	19.3686
45.5023	0	238.296	233.503	17	19.2673
45.5557	0	231.432	232.511	19	19.1665
45.6091	1	229.471	231.569	11	19.0663
45.6625	0	209.858	230.585	19	18.9666
45.7159	1	226.529	229.65	25	18.8676
45.7693	0	205.935	228.667	14	18.769
45.8227	0	224.567	227.689	32	18.671
45.876	0	224.567	226.715	29	18.5736
45.9294	0	204.954	225.746	18	18.4767
45.9828	0	217.703	224.781	27	18.3804
46.0362	0	185.342	223.826	21	18.2846
46.0896	1	213.78	222.921	29	18.1894
46.143	0	227.509	221.967	22	18.0946
46.1964	0	198.09	221.018	16	18.0005
46.2497	0	202.013	220.073	20	17.9068
46.3031	0	232.412	219.133	19	17.8137
46.3565	0	218.683	218.202	24	17.7211
46.4099	1	212.8	217.328	33	17.629
46.4633	1	227.509	216.45	21	17.5374
46.5167	0	228.49	215.535	17	17.4463
46.5701	2	194.167	214.715	6	17.3558
46.6234	0	198.09	213.795	23	17.2657
46.6768	0	189.264	212.878	17	17.1762
46.7302	0	211.819	211.966	17	17.0872
46.7836	0	219.664	211.058	17	16.9986
46.837	0	229.471	210.155	30	16.9106
46.8904	0	199.071	209.255	15	16.8231
46.9438	0	221.625	208.36	14	16.736
46.9972	0	177.496	207.475	15	16.6495
47.0505	1	220.645	206.639	20	16.5634
47.1039	0	196.129	205.755	22	16.4778
47.1573	0	221.625	204.875	27	16.3927
47.2107	0	200.051	203.998	9	16.308
47.2641	0	214.761	203.126	22	16.2239
47.3175	0	193.187	202.264	20	16.1402
47.3709	1	175.535	201.451	15	16.057
47.4243	0	189.264	200.589	11	15.9742
47.4776	0	191.225	199.731	17	15.8919
47.531	0	140.232	198.877	18	15.8101
47.5844	0	178.477	198.027	19	15.7287
47.6378	0	192.206	197.181	26	15.6479
47.6912	0	187.303	196.338	18	15.5674
47.7446	0	199.071	195.5	19	15.4874
47.798	0	177.496	194.665	14	15.4078
47.8513	0	182.4	193.834	17	15.3287
47.9047	0	190.245	193.012	22	15.2501
47.9581	1	195.148	192.24	18	15.1718
48.0115	0	196.129	191.418	25	15.0941
48.0649	0	185.342	190.6	13	15.0167
48.1183	0	169.651	189.786	15	14.9398
48.1717	0	171.613	188.975	12	14.8633
48.2251	0	170.632	188.168	20	14.7873
48.2784	0	200.051	187.365	18	14.7117
48.3318	0	175.535	186.565	27	14.6365
48.3852	0	191.225	185.769	24	14.5617
48.4386	0	164.748	184.976	23	14.4873
48.492	0	189.264	184.187	13	14.4134
48.5454	0	178.477	183.401	20	14.3399
48.5988	0	169.651	182.619	16	14.2668
48.6521	0	208.877	181.84	21	14.1941
48.7055	0	152	181.064	24	14.1218
48.7589	0	163.767	180.292	14	14.0499
48.8123	0	176.516	179.523	18	13.9784
48.8657	0	182.4	178.758	10	13.9073
48.9191	0	200.051	177.995	16	13.8366
48.9725	0	158.864	177.237	15	13.7663
49.0258	0	182.4	176.487	19	13.6965
49.0792	1	173.574	175.786	10	13.627
49.1326	0	165.729	175.036	11	13.5579
49.186	0	130.426	174.289	9	13.4891
49.2394	0	172.593	173.545	17	13.4208
49.2928	0	172.593	172.804	23	13.3528
49.3462	0	168.671	172.067	16	13.2853
49.3996	0	152	171.333	12	13.2181
49.4529	0	174.554	170.608	14	13.1513
49.5063	1	175.535	169.938	9	13.0848
49.5597	1	152.98	169.263	15	13.0188
49.6131	0	147.096	168.539	13	12.9531
49.6665	0	157.884	167.825	16	12.8877
49.7199	1	166.709	167.159	22	12.8228
49.7733	0	174.554	166.443	13	12.7582
49.8267	0	167.69	165.731	16	12.6939
49.88	0	147.096	165.029	16	12.6301
49.9334	1	180.438	164.374	11	12.5666
49.9868	0	158.864	163.671	11	12.5034
50.0402	0	153.961	162.97	14	12.4406
50.0936	0	146.116	162.273	11	12.3781
50.147	0	166.709	161.579	18	12.3161
50.2004	0	139.251	160.888	22	12.2543
50.2537	0	159.845	160.201	15	12.1929
50.3071	0	162.787	159.523	16	12.1318
50.3605	1	163.767	158.893	11	12.0711
50.4139	0	159.845	158.219	13	12.0107
50.4673	1	152	157.594	13	11.9507
50.5207	0	162.787	156.919	11	11.891
50.5741	0	178.477	156.247	11	11.8316
50.6275	0	156.903	155.579	10	11.7726
50.6808	0	153.961	154.926	14	11.7139
50.7342	2	142.193	154.366	11	11.6555
50.7876	0	161.806	153.704	20	11.5975
50.841	0	171.613	153.045	11	11.5398
50.8944	0	165.729	152.389	11	11.4824
50.9478	0	149.058	151.737	15	11.4253
51.0012	0	150.038	151.087	17	11.3686
51.0545	0	155.922	150.441	9	11.3121
51.1079	0	165.729	149.803	14	11.256
51.1613	1	142.193	149.214	3	11.2002
51.2147	0	164.748	148.575	18	11.1447
51.2681	0	154.942	147.939	12	11.0895
51.3215	0	154.942	147.306	16	11.0347
51.3749	0	147.096	146.682	11	10.9801
51.4282	1	131.406	146.119	13	10.9259
51.4816	2	139.251	145.596	10	10.8719
51.535	0	130.426	144.97	16	10.8183
51.5884	0	158.864	144.348	14	10.7649
51.6418	0	136.309	143.729	11	10.7119
51.6952	0	127.484	143.112	10	10.6591
51.7486	0	158.864	142.499	11	10.6067
51.802	0	118.658	141.889	11	10.5545
51.8554	0	144.155	141.281	6	10.5026
51.9087	0	139.251	140.676	6	10.4511
51.9621	0	145.135	140.075	10	10.3998
52.0155	0	152	139.476	13	10.3488
52.0689	0	128.464	138.879	10	10.2981
52.1223	0	137.29	138.286	10	10.2477
52.1757	0	149.058	137.701	17	10.1975
52.2291	1	136.309	137.17	4	10.1477
52.2824	1	136.309	136.635	12	10.0981
52.3358	0	144.155	136.049	6	10.0488
52.3892	0	130.426	135.466	15	9.99976
52.4426	0	129.445	134.886	13	9.951
52.496	0	126.503	134.309	17	9.90253
52.5494	0	157.884	133.74	11	9.85432
52.6028	1	137.29	133.219	7	9.80639
52.6561	0	129.445	132.649	10	9.75872
52.7095	0	125.522	132.08	13	9.71133
52.7629	0	120.619	131.515	5	9.66419
52.8163	0	128.464	130.952	18	9.61733
52.8697	0	139.251	130.392	11	9.57072
52.9231	0	126.503	129.841	12	9.52438
52.9765	1	119.638	129.337	16	9.4783
53.0299	0	125.522	128.783	14	9.43247
53.0832	0	119.638	128.232	15	9.38691
53.1366	0	109.832	127.683	10	9.3416
53.19	0	130.426	127.137	14	9.29654
53.2434	0	152	126.599	6	9.25173
53.2968	1	110.813	126.109	16	9.20718
53.3502	0	121.6	125.569	13	9.16288
53.4036	0	98.0643	125.032	6	9.11883
53.4569	0	122.58	124.503	7	9.07502
53.5103	1	125.522	124.021	11	9.03146
53.5637	0	116.697	123.49	10	8.98814
53.6171	0	110.813	122.961	10	8.94507
53.6705	0	110.813	122.434	11	8.90224
53.7239	0	96.103	121.91	8	8.85965
53.7773	0	129.445	121.389	4	8.8173
53.8307	0	99.045	120.869	5	8.77518
53.884	0	123.561	120.352	6	8.73331
53.9374	0	104.929	119.838	13	8.69166
53.9908	0	136.309	119.326	10	8.65025
54.0442	0	116.697	118.816	9	8.60908
54.0976	0	106.89	118.308	10	8.56813
54.151	0	120.619	117.803	11	8.52742
54.2044	0	110.813	117.3	9	8.48693
54.2578	0	105.909	116.799	11	8.44667
54.3111	0	132.387	116.307	14	8.40664
54.3645	1	117.677	115.862	15	8.36683
54.4179	0	110.813	115.366	11	8.32724
54.4713	0	112.774	114.873	10	8.28788
54.5247	0	91.1998	114.381	10	8.24873
54.5781	0	121.6	113.893	5	8.20981
54.6315	0	105.909	113.406	9	8.17111
54.6848	0	105.909	112.921	9	8.13262
54.7382	0	115.716	112.439	11	8.09435
54.7916	0	101.006	111.971	5	8.05629
54.845	2	120.619	111.596	10	8.01845
54.8984	0	113.755	111.117	12	7.98082
54.9518	0	105.909	110.64	11	7.9434
55.0052	0	96.103	110.166	5	7.90619
55.0585	0	86.2966	109.694	7	7.86919
55.1119	0	111.793	109.224	8	7.8324
55.1653	0	124.542	108.757	10	7.79581
55.2187	0	99.045	108.292	11	7.75943
55.2721	0	97.0837	107.828	9	7.72325
55.3255	0	96.103	107.367	8	7.68728
55.3789	0	115.716	106.908	11	7.65151
55.4323	0	104.929	106.451	14	7.61593
55.4856	0	110.813	105.996	9	7.58056
55.539	0	108.851	105.543	16	7.54539
55.5924	0	103.948	105.093	12	7.51041
55.6458	0	113.755	104.644	12	7.47563
55.6992	0	97.0837	104.197	6	7.44105
55.7526	0	118.658	103.758	10	7.40666
55.806	1	117.677	103.367	11	7.37246
55.8593	0	95.1224	102.924	10	7.33846
55.9127	0	98.0643	102.484	11	7.30464
55.9661	0	109.832	102.045	12	7.27102
56.0195	0	107.871	101.609	8	7.23758
56.0729	0	105.909	101.175	7	7.20434
56.1263	0	111.793	100.742	10	7.17127
56.1797	0	94.1418	100.312	10	7.1384
56.2331	0	93.1611	99.883	5	7.10571
56.2864	0	101.006	99.4563	9	7.0732
56.3398	0	114.735	99.0315	11	7.04087
56.3932	0	79.4321	98.6085	14	7.00873
56.4466	0	115.716	98.1875	5	6.97677
56.5	0	115.716	97.7682	11	6.94498
56.5534	0	105.909	97.3508	9	6.91338
56.6068	0	100.026	96.9353	11	6.88195
56.6602	0	88.2579	96.5215	6	6.8507
56.7135	0	95.1224	96.1096	8	6.81962
56.7669	0	95.1224	95.6994	11	6.78872
56.8203	0	95.1224	95.291	7	6.75799
56.8737	0	96.103	94.8906	6	6.72743
56.9271	1	77.4708	94.537	6	6.69705
56.9805	0	91.1998	94.1324	13	6.66683
57.0339	0	94.1418	93.7297	9	6.63679
57.0872	0	92.1805	93.3288	13	6.60691
57.1406	0	114.735	92.9297	7	6.5772
57.194	0	84.3353	92.5324	9	6.54766
57.2474	0	76.4902	92.1369	11	6.51828
57.3008	0	77.4708	91.7432	10	6.48907
57.3542	0	98.0643	91.3512	12	6.46003
57.4076	0	88.2579	90.9672	5	6.43114
57.4609	1	76.4902	90.6299	11	6.40242
57.5143	0	102.968	90.2416	13	6.37386
57.5677	0	93.1611	89.8552	13	6.34546
57.6211	0	88.2579	89.4705	7	6.31722
57.6745	0	89.2385	89.0876	7	6.28913
57.7279	0	82.374	88.7126	7	6.26121
57.7813	1	69.6257	88.3845	8	6.23344
57.8347	0	79.4321	88.0053	3	6.20583
57.888	0	95.1224	87.6404	7	6.17837
57.9414	2	89.2385	87.3674	7	6.15107
57.9948	0	90.2192	86.9907	14	6.12392
58.0482	0	88.2579	86.616	9	6.09692
58.1016	0	90.2192	86.2432	8	6.07007
58.155	0	94.1418	85.8785	12	6.04338
58.2084	1	87.2772	85.5607	16	6.01683
58.2617	0	89.2385	85.192	6	5.99043
58.3151	0	87.2772	84.8252	5	0
58.3685	0	74.5289	84.4603	7	0
58.4219	0	83.3547	84.1034	7	0
58.4753	1	71.587	83.7934	11	0
58.5287	0	91.1998	83.4324	4	0
58.5821	0	83.3547	83.0732	10	0
58.6355	0	95.1224	82.7159	7	0
58.6889	0	79.4321	82.3665	12	0
58.7422	1	102.968	82.064	12	0
58.7956	0	74.5289	81.7104	5	0
58.849	0	91.1998	81.3586	10	0
58.9024	0	90.2192	81.0087	13	0
58.9558	0	78.4515	80.6604	5	0
59.0092	0	86.2966	80.3139	4	0
59.0626	0	64.7224	79.9752	7	0
59.1159	1	85.316	79.6832	9	0
59.1693	0	80.4128	79.3402	3	0
59.2227	0	71.587	78.9989	7	0
59.2761	0	67.6644	78.6592	8	0
59.3295	0	75.5095	78.3212	11	0
59.3829	0	83.3547	77.9849	8	0
59.4363	0	79.4321	77.6563	4	0
59.4896	1	86.2966	77.3806	13	0
59.543	1	70.6063	77.0989	7	0
59.5964	0	66.6837	76.7661	4	0
59.6498	0	83.3547	76.435	5	0
59.7032	0	66.6837	76.1056	7	0
59.7566	0	79.4321	75.7779	7	0
59.81	0	78.4515	75.4518	3	0
59.8634	0	74.5289	75.1273	6	0
59.9167	0	80.4128	74.8044	8	0
59.9701	0	62.7612	74.483	11	0
60.0235	0	70.6063	74.1632	8	0
60.0769	0	86.2966	73.8511	10	0
60.1303	1	99.045	73.5855	4	0
60.1837	0	73.5482	73.2688	5	0
60.2371	0	62.7612	72.9535	8	0
60.2904	0	77.4708	72.6398	7	0
60.3438	0	53.9354	72.3277	5	0
60.3972	0	64.7224	72.017	3	0
60.4506	0	67.6644	71.7078	10	0
60.504	0	89.2385	71.4	5	0
60.5574	0	78.4515	71.0936	8	0
60.6108	0	75.5095	70.7887	11	0
60.6642	0	68.645	70.4852	11	0
60.7175	0	66.6837	70.183	10	0
60.7709	0	62.7612	69.8884	5	0
60.8243	1	69.6257	69.6403	3	0
60.8777	0	67.6644	69.3407	2	0
60.9311	0	81.3934	69.0427	8	0
60.9845	0	68.645	68.746	9	0
61.0379	0	70.6063	68.4507	6	0
61.0913	0	60.7999	68.1569	4	0
61.1446	0	83.3547	67.8643	8	0
61.198	0	74.5289	67.5732	8	0
61.2514	0	72.5676	67.2895	4	0
61.3048	1	70.6063	67.0523	4	0
61.3582	0	69.6257	66.7636	3	0
61.4116	0	85.316	66.4764	5	0
61.465	0	91.1998	66.1905	9	0
61.5183	0	72.5676	65.906	6	0
61.5717	0	74.5289	65.6229	7	0
61.6251	0	71.587	65.341	2	0
61.6785	0	59.8192	65.0605	2	0
61.7319	0	67.6644	64.7813	4	0
61.7853	0	60.7999	64.5033	6	0
61.8387	0	61.7805	64.2266	13	0
61.892	0	64.7224	63.9512	5	0
61.9454	0	62.7612	63.677	8	0
61.9988	0	76.4902	63.404	9	0
62.0522	0	77.4708	63.1322	7	0
62.1056	0	57.858	62.8617	6	0
62.159	0	65.7031	62.5923	7	0
62.2124	0	58.8386	62.3241	7	0
62.2658	0	63.7418	62.0633	2	0
62.3191	1	53.9354	61.8488	4	0
62.3725	0	62.7612	61.5827	2	0
62.4259	0	68.645	61.3178	8	0
62.4793	0	64.7224	61.0543	3	0
62.5327	0	62.7612	60.7919	6	0
62.5861	0	73.5482	60.537	3	0
62.6395	1	58.8386	60.3283	4	0
62.6928	0	63.7418	60.0681	5	0
62.7462	0	63.7418	59.8092	5	0
62.7996	0	54.916	59.5516	5	0
62.853	0	54.916	59.2953	9	0
62.9064	0	60.7999	59.0401	4	0
62.9598	0	53.9354	58.7861	6	0
63.0132	0	57.858	58.5334	5	0
63.0666	0	55.8967	58.2818	6	0
63.12	0	68.645	58.0314	6	0
63.1733	0	57.858	57.7821	8	0
63.2267	0	60.7999	57.534	4	0
63.2801	0	47.0709	57.287	8	0
63.3335	0	55.8967	57.0473	5	0
63.3869	1	58.8386	56.8538	3	0
63.4403	0	54.916	56.6086	5	0
63.4937	0	59.8192	56.3647	8	0
63.547	0	52.9547	56.1219	5	0
63.6004	0	48.0515	55.8803	5	0
63.6538	0	54.916	55.6399	3	0
63.7072	0	62.7612	55.4005	5	0
63.7606	0	62.7612	55.1623	8	0
63.814	0	64.7224	54.9252	1	0
63.8674	0	54.916	54.6953	2	0
63.9207	1	52.9547	54.5117	4	0
63.9741	0	61.7805	54.2763	4	0
64.0275	0	50.0128	54.0421	5	0
64.0809	0	54.916	53.8153	2	0
64.1343	1	51.9741	53.6347	9	0
64.1877	0	51.9741	53.4025	4	0
64.2411	0	46.0902	53.1715	4	0
64.2944	0	63.7418	52.9416	4	0
64.3478	0	55.8967	52.7129	3	0
64.4012	0	48.0515	52.4854	11	0
64.4546	0	77.4708	52.259	4	0
64.508	0	53.9354	52.0337	6	0
64.5614	0	48.0515	51.8094	7	0
64.6148	0	56.8773	51.5862	6	0
64.6682	0	52.9547	51.3641	7	0
64.7215	0	46.0902	51.1429	4	0
64.7749	0	52.9547	50.9229	4	0
64.8283	0	55.8967	50.7038	6	0
64.8817	0	45.1096	50.4857	5	0
64.9351	0	63.7418	50.2686	4	0
64.9885	0	36.2838	50.0525	2	0
65.0419	0	50.0128	49.8374	2	0
65.0952	0	51.9741	49.6232	7	0
65.1486	0	54.916	49.4099	3	0
65.202	0	54.916	49.1977	6	0
65.2554	0	47.0709	48.9863	3	0
65.3088	0	45.1096	48.7759	4	0
65.3622	0	46.0902	48.5788	3	0
65.4156	2	49.0322	48.4727	6	0
65.469	0	48.0515	48.2684	2	0
65.5224	1	41.187	48.1103	3	0
65.5757	0	40.2064	47.9006	9	0
65.6291	0	46.0902	47.6921	3	0
65.6825	0	50.9935	47.4847	4	0
65.7359	0	46.0902	47.2784	5	0
65.7893	0	55.8967	47.0795	2	0
65.8427	1	49.0322	46.9267	5	0
65.8961	0	54.916	46.7222	6	0
65.9494	0	48.0515	46.5189	4	0
66.0028	0	33.3419	46.3167	6	0
66.0562	0	50.9935	46.1156	6	0
66.1096	0	45.1096	45.9218	4	0
66.163	1	51.9741	45.774	2	0
66.2164	0	50.9935	45.5746	3	0
66.2698	0	47.0709	45.3763	1	0
66.3231	0	48.0515	45.179	4	0
66.3765	0	38.2451	44.9828	6	0
66.4299	0	40.2064	44.7877	4	0
66.4833	0	47.0709	44.5935	5	0
66.5367	0	42.1677	44.4003	3	0
66.5901	0	42.1677	44.2081	4	0
66.6435	0	47.0709	44.0168	6	0
66.6969	0	42.1677	43.8265	1	0
66.7502	0	44.129	43.6371	3	0
66.8036	0	48.0515	43.4547	6	0
66.857	1	41.187	43.3184	4	0
66.9104	0	36.2838	43.1302	2	0
66.9638	0	50.0128	42.943	5	0
67.0172	0	49.0322	42.7567	2	0
67.0706	0	48.0515	42.5714	1	0
67.1239	0	40.2064	42.3871	4	0
67.1773	0	44.129	42.2036	1	0
67.2307	0	50.9935	42.021	7	0
67.2841	0	48.0515	41.8393	1	0
67.3375	0	47.0709	41.6584	6	0
67.3909	0	45.1096	41.4847	6	0
67.4443	1	47.0709	41.3568	2	0
67.4977	0	45.1096	41.177	7	0
67.551	0	37.2644	40.9982	1	0
67.6044	0	41.187	40.8203	2	0
67.6578	0	34.3225	40.6433	3	0
67.7112	0	45.1096	40.4671	1	0
67.7646	0	40.2064	40.2918	1	0
67.818	0	32.3612	40.1174	2	0
67.8714	0	38.2451	39.9438	6	0
67.9248	0	36.2838	39.7711	4	0
67.9781	0	47.0709	39.6053	2	0
68.0315	1	36.2838	39.4854	6	0
68.0849	0	41.187	39.3198	1	0
68.1383	1	34.3225	39.2002	4	0
68.1917	0	43.1483	39.0288	1	0
68.2451	0	40.2064	38.8583	5	0
68.2985	0	39.2257	38.6887	4	0
68.3518	0	37.2644	38.5201	1	0
68.4052	0	31.3806	38.3524	1	0
68.4586	0	34.3225	38.1856	4	0
68.512	0	40.2064	38.0196	4	0
68.5654	0	44.129	37.8607	5	0
68.6188	1	32.3612	37.7538	4	0
68.6722	1	37.2644	37.6401	6	0
68.7255	0	41.187	37.4747	4	0
68.7789	0	33.3419	37.3102	3	0
68.8323	0	42.1677	37.1467	1	0
68.8857	0	36.2838	36.9904	3	0
68.9391	1	49.0322	36.88	0	0
68.9925	0	44.129	36.7178	6	0
69.0459	0	40.2064	36.5628	3	0
69.0993	1	32.3612	36.4539	3	0
69.1526	0	46.0902	36.2931	2	0
69.206	0	35.3032	36.1333	2	0
69.2594	0	38.2451	35.9745	5	0
69.3128	0	36.2838	35.8167	4	0
69.3662	0	37.2644	35.6597	3	0
69.4196	0	36.2838	35.5037	7	0
69.473	0	35.3032	35.3485	4	0
69.5263	0	38.2451	35.1941	4	0
69.5797	0	30.3999	35.0406	8	0
69.6331	0	36.2838	34.8878	5	0
69.6865	0	43.1483	34.7359	5	0
69.7399	0	42.1677	34.5847	6	0
69.7933	0	41.187	34.4404	2	0
69.8467	1	39.2257	34.342	4	0
69.9001	0	44.129	34.1916	4	0
69.9535	0	25.4967	34.042	1	0
70.0068	0	41.187	33.8933	2	0
70.0602	0	40.2064	33.7515	2	0
70.1136	1	41.187	33.6556	3	0
70.167	0	30.3999	33.5077	7	0
70.2204	0	29.4193	33.3607	4	0
70.2738	0	38.2451	33.2145	1	0
70.3272	0	28.4386	33.0691	4	0
70.3805	0	38.2451	32.9245	4	0
70.4339	0	36.2838	32.7806	6	0
70.4873	0	31.3806	32.6437	6	0
70.5407	1	30.3999	32.5526	4	0
70.5941	0	37.2644	32.4096	5	0
70.6475	0	32.3612	32.2673	2	0
70.7009	0	31.3806	32.1259	3	0
70.7542	0	28.4386	31.9852	2	0
70.8076	0	29.4193	31.8452	0	0
70.861	0	29.4193	31.7123	8	0
70.9144	1	29.4193	31.6251	2	0
70.9678	0	30.3999	31.4859	2	0
71.0212	0	37.2644	31.3475	3	0
71.0746	0	19.6129	31.2099	4	0
71.1279	0	28.4386	31.0792	3	0
71.1813	1	28.4386	30.9944	1	0
71.2347	0	32.3612	30.8762	2	0
71.2881	3	24.5161	30.894	1	0
71.3415	0	33.3419	30.7545	2	0
71.3949	0	35.3032	30.6224	3	0
71.4483	1	39.2257	30.5363	1	0
71.5017	0	35.3032	30.3986	5	0
71.555	0	26.4774	30.262	1	0
71.6084	0	22.5548	30.1325	1	0
71.6618	1	30.3999	30.0492	3	0
71.7152	0	23.5354	29.914	2	0
71.7686	0	34.3225	29.7799	5	0
71.822	0	26.4774	29.6468	1	0
71.8754	0	34.3225	29.5145	3	0
71.9287	0	20.5935	29.3832	1	0
71.9821	0	42.1677	29.2527	9	0
72.0355	0	33.3419	29.1231	3	0
72.0889	0	33.3419	28.9942	1	0
72.1423	0	31.3806	28.8661	4	0
72.1957	0	31.3806	28.745	3	0
72.2491	1	24.5161	28.6697	3	0
72.3025	0	32.3612	28.5547	3	0
72.3559	2	28.4386	28.5307	2	0
72.4092	0	32.3612	28.4021	1	0
72.4626	0	26.4774	28.2745	0	0
72.516	0	37.2644	28.1477	1	0
72.5694	0	28.4386	28.0219	4	0
72.6228	0	28.4386	27.897	3	0
72.6762	0	20.5935	27.7728	3	0
72.7296	0	28.4386	27.6494	1	0
72.7829	0	23.5354	27.5268	2	0
72.8363	0	28.4386	27.405	2	0
72.8897	0	30.3999	27.2838	3	0
72.9431	0	33.3419	27.1633	0	0
72.9965	0	31.3806	27.0436	3	0
73.0499	0	22.5548	26.9244	5	0
73.1033	0	23.5354	26.8059	0	0
73.1566	0	29.4193	26.6881	0	0
73.21	0	30.3999	26.5708	1	0
73.2634	0	18.6322	26.4604	2	0
73.3168	1	21.5741	26.3956	1	0
73.3702	0	20.5935	26.2787	1	0
73.4236	0	26.4774	26.1624	1	0
73.477	0	32.3612	26.0468	3	0
73.5304	0	19.6129	25.9319	1	0
73.5837	0	23.5354	25.8176	3	0
73.6371	0	20.5935	25.7039	0	0
73.6905	0	26.4774	25.5908	4	0
73.7439	0	21.5741	25.4783	0	0
73.7973	0	26.4774	25.3663	4	0
73.8507	0	29.4193	25.255	3	0
73.9041	0	25.4967	25.1441	4	0
73.9574	0	17.6516	25.04	1	0
74.0108	1	20.5935	24.9815	2	0
74.0642	0	22.5548	24.8709	4	0
74.1176	0	30.3999	24.7608	1	0
74.171	0	30.3999	24.6514	4	0
74.2244	0	21.5741	24.5426	3	0
74.2778	0	23.5354	24.4343	1	0
74.3312	0	24.5161	24.3267	2	0
74.3845	0	29.4193	24.2258	1	0
74.4379	1	33.3419	24.1705	2	0
74.4913	0	18.6322	24.063	4	0
74.5447	0	21.5741	23.9562	1	0
74.5981	0	21.5741	23.85	1	0
74.6515	0	21.5741	23.7444	4	0
74.7049	0	27.458	23.6394	4	0
74.7583	0	26.4774	23.5349	0	0
74.8116	0	17.6516	23.431	1	0
74.865	0	18.6322	23.3277	3	0
74.9184	0	22.5548	23.2249	3	0
74.9718	0	20.5935	23.1226	1	0
75.0252	0	24.5161	23.0208	1	0
75.0786	0	21.5741	22.9258	2	0
75.132	1	32.3612	22.8762	2	0
75.1853	0	16.6709	22.7745	0	0
75.2387	0	19.6129	22.6734	3	0
75.2921	0	23.5354	22.5728	0	0
75.3455	0	12.7484	22.4728	1	0
75.3989	0	30.3999	22.3734	0	0
75.4523	0	25.4967	22.2745	4	0
75.5057	0	15.6903	22.1823	2	0
75.559	1	34.3225	22.1419	2	0
75.6124	1	26.4774	22.0943	3	0
75.6658	0	16.6709	21.9947	1	0
75.7192	0	24.5161	21.8957	5	0
75.7726	0	15.6903	21.8036	1	0
75.826	1	19.6129	21.7572	1	0
75.8794	0	19.6129	21.6588	3	0
75.9328	0	13.729	21.5611	2	0
75.9861	0	22.5548	21.464	1	0
76.0395	0	25.4967	21.3676	3	0
76.0929	0	14.7096	21.2718	3	0
76.1463	0	19.6129	21.1766	2	0
76.1997	0	21.5741	21.082	1	0
76.2531	0	17.6516	20.9942	2	0
76.3065	1	22.5548	20.9644	6	0
76.3598	2	20.5935	20.985	3	0
76.4132	2	17.6516	20.9909	5	0
76.4666	0	20.5935	20.8923	1	0
76.52	0	21.5741	20.7947	5	0
76.5734	0	22.5548	20.7042	4	0
76.6268	1	19.6129	20.666	2	0
76.6802	1	18.6322	20.6209	3	0
76.7336	0	24.5161	20.5241	2	0
76.787	0	19.6129	20.4282	1	0
76.8403	0	23.5354	20.3395	2	0
76.8937	1	15.6903	20.2967	1	0
76.9471	0	22.5548	20.2021	3	0
77.0005	0	29.4193	20.1083	1	0
77.0539	0	15.6903	20.0154	6	0
77.1073	0	16.6709	19.9233	2	0
77.1607	0	20.5935	19.8319	2	0
77.214	0	31.3806	19.7413	2	0
77.2674	0	30.3999	19.6513	1	0
77.3208	0	23.5354	19.5621	5	0
77.3742	0	21.5741	19.4734	5	0
77.4276	0	24.5161	19.3853	4	0
77.481	0	22.5548	19.3041	2	0
77.5344	1	15.6903	19.2684	6	0
77.5877	0	14.7096	19.1806	6	0
77.6411	0	14.7096	19.0935	3	0
77.6945	0	22.5548	19.0069	1	0
77.7479	0	18.6322	18.9209	3	0
77.8013	0	25.4967	18.8355	2	0
77.8547	0	19.6129	18.7507	2	0
77.9081	0	23.5354	18.6663	3	0
77.9614	0	19.6129	18.5825	5	0
78.0148	0	25.4967	18.4991	0	0
78.0682	0	22.5548	18.4163	0	0
78.1216	0	32.3612	18.3338	4	0
78.175	0	16.6709	18.2519	2	0
78.2284	0	9.80643	18.1704	1	0
78.2818	0	18.6322	18.0893	3	0
78.3352	0	13.729	18.0148	2	0
78.3885	1	14.7096	17.9858	3	0
78.4419	0	22.5548	17.9046	2	0
78.4953	0	18.6322	17.8238	0	0
78.5487	0	17.6516	17.7435	2	0
78.6021	0	10.7871	17.6637	3	0
78.6555	0	14.7096	17.5844	1	0
78.7089	0	17.6516	17.5055	2	0
78.7622	0	16.6709	17.4271	0	0
78.8156	0	13.729	17.349	3	0
78.869	0	23.5354	17.2715	2	0
78.9224	0	20.5935	17.1943	5	0
78.9758	0	21.5741	17.1175	1	0
79.0292	0	21.5741	17.0411	1	0
79.0826	0	21.5741	16.9651	1	0
79.136	0	13.729	16.8894	0	0
79.1894	0	18.6322	16.8141	0	0
79.2427	0	19.6129	16.7392	3	0
79.2961	0	26.4774	16.6647	4	0
79.3495	0	22.5548	16.5905	1	0
79.4029	0	9.80643	16.5167	3	0
79.4563	0	11.7677	16.4432	4	0
79.5097	0	13.729	16.37	0	0
79.5631	0	15.6903	16.2972	5	0
79.6164	0	19.6129	16.2247	1	0
79.6698	0	18.6322	16.1526	3	0
79.7232	0	16.6709	16.0808	4	0
79.7766	0	19.6129	16.0217	3	0
79.83	2	13.729	16.053	4	0
79.8834	0	10.7871	15.9793	1	0
79.9368	0	17.6516	15.9062	2	0
79.9901	0	21.5741	15.8335	4	0
80.0435	0	18.6322	15.7614	2	0
80.0969	0	19.6129	15.6897	0	0
80.1503	0	13.729	15.6185	2	0
80.2037	0	18.6322	15.5477	0	0
80.2571	0	14.7096	15.4774	2	0
80.3105	0	17.6516	15.4075	3	0
80.3639	0	23.5354	15.338	3	0
80.4172	0	13.729	15.2689	1	0
80.4706	0	15.6903	15.2001	3	0
80.524	0	20.5935	15.1317	2	0
80.5774	0	19.6129	15.0637	1	0
80.6308	0	20.5935	14.9961	0	0
80.6842	0	18.6322	14.9288	3	0
80.7376	0	17.6516	14.8618	2	0
80.7909	0	13.729	14.7952	1	0
80.8443	0	15.6903	14.7289	0	0
80.8977	0	14.7096	14.6629	3	0
80.9511	0	20.5935	14.5973	2	0
81.0045	0	18.6322	14.532	1	0
81.0579	0	12.7484	14.4669	3	0
81.1113	0	12.7484	14.4022	0	0
81.1647	0	11.7677	14.3378	0	0
81.218	0	22.5548	14.2737	0	0
81.2714	0	16.6709	14.2098	1	0
81.3248	0	19.6129	14.1463	6	0
81.3782	0	18.6322	14.0893	1	0
81.4316	1	9.80643	14.0776	1	0
81.485	0	21.5741	14.0135	2	0
81.5384	0	10.7871	13.9498	1	0
81.5918	0	11.7677	13.8927	5	0
81.6451	1	12.7484	13.881	1	0
81.6985	0	13.729	13.817	2	0
81.7519	0	19.6129	13.7535	5	0
81.8053	0	13.729	13.6904	5	0
81.8587	0	15.6903	13.6277	2	0
81.9121	0	7.84515	13.5654	1	0
81.9655	0	11.7677	13.5035	1	0
82.0188	0	16.6709	13.442	3	0
82.0722	0	22.5548	13.3809	1	0
82.1256	0	19.6129	13.3201	1	0
82.179	0	13.729	13.2659	3	0
82.2324	1	11.7677	13.257	2	0
82.2858	0	10.7871	13.1959	0	0
82.3392	0	14.7096	13.1413	3	0
82.3925	1	10.7871	13.1323	2	0
82.4459	0	11.7677	13.0771	2	0
82.4993	1	14.7096	13.0737	2	0
82.5527	1	25.4967	13.0632	3	0
82.6061	0	14.7096	13.0005	1	0
82.6595	0	13.729	12.9384	1	0
82.7129	0	22.5548	12.8832	2	0
82.7663	1	15.6903	12.8736	1	0
82.8196	0	10.7871	12.8119	1	0
82.873	0	18.6322	12.7508	0	0
82.9264	0	17.6516	12.6903	4	0
82.9798	0	11.7677	12.6303	3	0
83.0332	0	18.6322	12.5771	0	0
83.0866	1	12.7484	12.5694	1	0
83.14	0	11.7677	12.5096	2	0
83.1933	0	10.7871	12.4502	2	0
83.2467	0	12.7484	12.3915	3	0
83.3001	0	18.6322	12.3332	0	0
83.3535	0	9.80643	12.2754	1	0
83.4069	0	14.7096	12.218	1	0
83.4603	0	15.6903	12.1611	4	0
83.5137	0	16.6709	12.1108	1	0
83.5671	1	6.8645	12.106	4	0
83.6205	0	11.7677	12.0489	3	0
83.6738	0	9.80643	11.9985	1	0
83.7272	1	11.7677	11.9997	1	0
83.7806	1	10.7871	12	2	0
83.834	1	12.7484	11.9932	3	0
83.8874	0	4.90322	11.9405	2	0
83.9408	1	13.729	11.9336	1	0
83.9942	0	16.6709	11.8746	4	0
84.0475	0	12.7484	11.8163	2	0
84.1009	0	10.7871	11.7587	2	0
84.1543	0	10.7871	11.7017	3	0
84.2077	0	10.7871	11.6516	2	0
84.2611	1	15.6903	11.647	0	0
84.3145	0	12.7484	11.5903	1	0
84.3679	0	13.729	11.5342	1	0
84.4213	0	11.7677	11.4786	2	0
84.4746	0	17.6516	11.4236	0	0
[truncated: 2,096 more rows]
