# Supplementary material for: In-depth chiral sensing capability of C-dots in a biomimetic protein-based hydrogel: a probe for chiral recognition applications
Source: Royal Society of Chemistry journal article supplement (doi:10.1039/d5bm01508a), 2026-01-01
Supplement: d5bm01508a1.zip [file Figure S7.xlsx]

## Sheet: Figure S7 (a)
200	2.398
201	2.466
202	2.525
203	2.583
204	2.636
205	2.675
206	2.733
207	2.791
208	2.842
209	2.897
210	2.955
211	3.011
212	3.052
213	3.103
214	3.153
215	3.202
216	3.224
217	3.255
218	3.265
219	3.25
220	3.223
221	3.159
222	3.057
223	2.932
224	2.776
225	2.605
226	2.427
227	2.24
228	2.05
229	1.854
230	1.658
231	1.462
232	1.273
233	1.103
234	0.936
235	0.79
236	0.663
237	0.547
238	0.451
239	0.375
240	0.312
241	0.26
242	0.219
243	0.185
244	0.159
245	0.14
246	0.126
247	0.116
248	0.108
249	0.102
250	0.099
251	0.099
252	0.1
253	0.101
254	0.101
255	0.103
256	0.106
257	0.112
258	0.117
259	0.122
260	0.125
261	0.128
262	0.132
263	0.137
264	0.144
265	0.15
266	0.154
267	0.159
268	0.165
269	0.17
270	0.173
271	0.177
272	0.182
273	0.186
274	0.19
275	0.194
276	0.196
277	0.196
278	0.195
279	0.191
280	0.188
281	0.184
282	0.18
283	0.175
284	0.167
285	0.155
286	0.141
287	0.125
288	0.11
289	0.096
290	0.084
291	0.072
292	0.061
293	0.051
294	0.042
295	0.035
296	0.029
297	0.024
298	0.02
299	0.017
300	0.014
301	0.011
302	0.009
303	0.008
304	0.006
305	0.005
306	0.004
307	0.003
308	0.003
309	0.002
310	0.001
311	0.001
312	0.001
313	0.001
314	0.001
315	0
316	0
317	0
318	0
319	-0.001
320	-0.001
321	-0.001
322	-0.001
323	-0.001
324	-0.001
325	-0.001
326	-0.001
327	-0.002
328	-0.002
329	-0.002
330	-0.002
331	-0.002
332	-0.002
333	-0.002
334	-0.002
335	-0.002
336	-0.002
337	-0.002
338	-0.003
339	-0.002
340	-0.002
341	-0.003
342	-0.002
343	-0.002
344	-0.003
345	-0.002
346	-0.002
347	-0.003
348	-0.003
349	-0.003
350	-0.003
351	-0.003
352	-0.003
353	-0.003
354	-0.003
355	-0.003
356	-0.003
357	-0.003
358	-0.003
359	-0.003
360	-0.003
361	-0.003
362	-0.003
363	-0.003
364	-0.003
365	-0.003
366	-0.003
367	-0.003
368	-0.004
369	-0.003
370	-0.004
371	-0.003
372	-0.004
373	-0.003
374	-0.003
375	-0.003
376	-0.003
377	-0.003
378	-0.003
379	-0.003
380	-0.003
381	-0.003
382	-0.003
383	-0.003
384	-0.003
385	-0.003
386	-0.003
387	-0.003
388	-0.003
389	-0.003
390	-0.003
391	-0.003
392	-0.003
393	-0.003
394	-0.003
395	-0.003
396	-0.003
397	-0.003
398	-0.003
399	-0.003
400	-0.003
401	-0.003
402	-0.003
403	-0.003
404	-0.003
405	-0.003
406	-0.003
407	-0.003
408	-0.003
409	-0.003
410	-0.003
411	-0.003
412	-0.003
413	-0.003
414	-0.003
415	-0.003
416	-0.003
417	-0.003
418	-0.003
419	-0.003
420	-0.003
421	-0.003
422	-0.003
423	-0.003
424	-0.004
425	-0.003
426	-0.003
427	-0.003
428	-0.004
429	-0.003
430	-0.003
431	-0.003
432	-0.003
433	-0.003
434	-0.003
435	-0.003
436	-0.003
437	-0.003
438	-0.003
439	-0.003
440	-0.003
441	-0.003
442	-0.003
443	-0.003
444	-0.003
445	-0.003
446	-0.003
447	-0.003
448	-0.003
449	-0.003
450	-0.003
451	-0.003
452	-0.003
453	-0.003
454	-0.003
455	-0.003
456	-0.003
457	-0.003
458	-0.003
459	-0.003
460	-0.003
461	-0.003
462	-0.003
463	-0.003
464	-0.003
465	-0.003
466	-0.003
467	-0.003
468	-0.003
469	-0.003
470	-0.003
471	-0.003
472	-0.003
473	-0.003
474	-0.003
475	-0.003
476	-0.003
477	-0.003
478	-0.003
479	-0.003
480	-0.003
481	-0.003
482	-0.003
483	-0.003
484	-0.003
485	-0.003
486	-0.003
487	-0.003
488	-0.003
489	-0.003
490	-0.003
491	-0.003
492	-0.003
493	-0.003
494	-0.003
495	-0.003
496	-0.003
497	-0.003
498	-0.003
499	-0.003
500	-0.003
501	-0.003
502	-0.003
503	-0.003
504	-0.003
505	-0.003
506	-0.003
507	-0.003
508	-0.003
509	-0.003
510	-0.003
511	-0.003
512	-0.003
513	-0.003
514	-0.003
515	-0.003
516	-0.003
517	-0.003
518	-0.003
519	-0.003
520	-0.003
521	-0.003
522	-0.002
523	-0.002
524	-0.002
525	-0.003
526	-0.002
527	-0.002
528	-0.002
529	-0.002
530	-0.002
531	-0.002
532	-0.002
533	-0.002
534	-0.002
535	-0.002
536	-0.003
537	-0.002
538	-0.002
539	-0.002
540	-0.002
541	-0.002
542	-0.002
543	-0.002
544	-0.002
545	-0.002
546	-0.002
547	-0.002
548	-0.002
549	-0.002
550	-0.002
551	-0.002
552	-0.002
553	-0.002
554	-0.002
555	-0.002
556	-0.002
557	-0.002
558	-0.002
559	-0.002
560	-0.002
561	-0.002
562	-0.002
563	-0.002
564	-0.002
565	-0.002
566	-0.002
567	-0.002
568	-0.002
569	-0.002
570	-0.002
571	-0.002
572	-0.002
573	-0.002
574	-0.002
575	-0.002
576	-0.002
577	-0.002
578	-0.002
579	-0.002
580	-0.002
581	-0.002
582	-0.002
583	-0.002
584	-0.002
585	-0.002
586	-0.002
587	-0.002
588	-0.002
589	-0.002
590	-0.002
591	-0.002
592	-0.002
593	-0.002
594	-0.002
595	-0.002
596	-0.002
597	-0.002
598	-0.002
599	-0.002
600	-0.002
601	-0.002
602	-0.002
603	-0.002
604	-0.002
605	-0.002
606	-0.002
607	-0.002
608	-0.002
609	-0.002
610	-0.002
611	-0.002
612	-0.002
613	-0.001
614	-0.001
615	-0.001
616	-0.001
617	-0.001
618	-0.001
619	-0.001
620	-0.001
621	-0.001
622	-0.001
623	-0.001
624	-0.001
625	-0.001
626	-0.001
627	-0.001
628	-0.001
629	-0.001
630	-0.001
631	-0.001
632	-0.001
633	-0.001
634	-0.001
635	-0.001
636	-0.001
637	-0.001
638	-0.001
639	-0.001
640	-0.001
641	-0.001
642	-0.001
643	-0.001
644	-0.001
645	-0.001
646	-0.001
647	-0.001
648	-0.001
649	-0.001
650	-0.001
651	-0.001
652	-0.001
653	-0.001
654	-0.001
655	-0.001
656	-0.001
657	-0.001
658	-0.001
659	-0.001
660	-0.001
661	-0.001
662	-0.001
663	-0.001
664	-0.001
665	-0.001
666	-0.001
667	-0.001
668	-0.001
669	-0.001
670	-0.001
671	-0.001
672	-0.001
673	-0.001
674	-0.001
675	-0.001
676	-0.001
677	-0.001
678	-0.001
679	-0.001
680	-0.001
681	-0.001
682	-0.001
683	-0.001
684	-0.001
685	-0.001
686	-0.001
687	-0.001
688	-0.001
689	-0.001
690	-0.001
691	-0.001
692	-0.001
693	-0.001
694	-0.001
695	-0.001
696	-0.001
697	-0.001
698	-0.001
699	-0.001
700	-0.001
701	-0.001
702	-0.001
703	-0.001
704	-0.001
705	-0.001
706	-0.001
707	-0.001
708	-0.001
709	-0.001
710	-0.001
711	-0.001
712	-0.001
713	-0.001
714	-0.001
715	-0.001
716	-0.001
717	-0.001
718	-0.001
719	-0.001
720	-0.001
721	-0.001
722	-0.001
723	-0.001
724	-0.001
725	-0.001
726	-0.001
727	-0.001
728	-0.001
729	-0.001
730	-0.001
731	-0.001
732	-0.001
733	-0.001
734	-0.001
735	-0.001
736	-0.001
737	-0.001
738	-0.001
739	-0.001
740	-0.001
741	-0.001
742	-0.001
743	-0.001
744	-0.001
745	-0.001
746	-0.001
747	-0.001
748	-0.001
749	-0.001
750	-0.001
751	-0.001
752	-0.001
753	-0.001
754	-0.001
755	-0.001
756	-0.001
757	-0.001
758	-0.001
759	-0.001
760	-0.001
761	-0.001
762	-0.001
763	-0.001
764	-0.001
765	-0.001
766	-0.001
767	-0.001
768	-0.001
769	-0.001
770	-0.001
771	-0.001
772	-0.001
773	-0.001
774	-0.001
775	-0.001
776	-0.001
777	-0.001
778	-0.001
779	-0.001
780	-0.001
781	-0.001
782	-0.001
783	-0.001
784	-0.001
785	-0.001
786	-0.001
787	-0.001
788	-0.001
789	-0.001
790	-0.001
791	-0.001
792	-0.001
793	-0.001
794	-0.001
795	-0.001
796	-0.001
797	-0.001
798	-0.001
799	-0.001
800	-0.001

## Sheet: Figure S7 (b)
Column1	Column2
'BSA_280'
'Wavelength	'Intensity'
300	100.5
301	174
302	252.9
303	406.1
304	629.3
305	850
306	1071.3
307	1390.6
308	1721.6
309	2066.4
310	2355.4
311	2562.7
312	2915.3
313	3197.8
314	3484.4
315	3740.2
316	4014.8
317	4309.9
318	4320.2
319	4623.9
320	4782.6
321	4864.1
322	4996.9
323	4986.1
324	5188.7
325	5162.8
326	5291.7
327	5150.2
328	5188.6
329	5119.2
330	5209.6
331	5145.5
332	5199.5
333	5095.1
334	5062.1
335	5106.1
336	5041.6
337	4871.3
338	4841
339	4807.1
340	4635.8
341	4508.2
342	4391.6
343	4311.8
344	4168.5
345	4075.4
346	3979
347	3872.3
348	3793.3
349	3657.4
350	3572.3
351	3526.5
352	3465.5
353	3338.7
354	3207.6
355	3075.5
356	3043.8
357	2928.4
358	2910.5
359	2787.1
360	2727.5
361	2656.3
362	2587.3
363	2551.6
364	2501.8
365	2449.4
366	2444.6
367	2428.7
368	2407.7
369	2384.5
370	2381.5
371	2366.1
372	2354.4
373	2371.8
374	2371.3
375	2362
376	2337.3
377	2267.6
378	2242.9
379	2246.2
380	2156.5
381	2128.6
382	2078.2
383	2014.2
384	1957.2
385	1904.6
386	1874.6
387	1850.4
388	1783.6
389	1730.5
390	1716.9
391	1671.9
392	1632.6
393	1603.6
394	1583.8
395	1489.4
396	1492.7
397	1484.1
398	1464.4
399	1411.8
400	1356.5
401	1349.4
402	1346.5
403	1271.6
404	1298.1
405	1218.5
406	1223.5
407	1173.3
408	1131.2
409	1150.7
410	1083.1
411	1048
412	1019
413	1025.5
414	988.1
415	988.6
416	966.8
417	906.2
418	924.6
419	906.5
420	877.2
421	851.5
422	828.8
423	823.8
424	803.5
425	795.2
426	777.6
427	737.2
428	746.4
429	720.6
430	722.6
431	689.2
432	696.2
433	671.5
434	660.9
435	662.3
436	644.5
437	616.7
438	649.4
439	594.4
440	624.5
441	615.2
442	604.8
443	590.1
444	589.7
445	594.1
446	601.5
447	575.9
448	591.8
449	584
450	566
451	596.7
452	576
453	580.7
454	558.2
455	564.4
456	551.7
457	566
458	542.6
459	522.8
460	523.6
461	541.9
462	544.2
463	541.8
464	554.9
465	542.5
466	554.7
467	544.2
468	549.3
469	535.3
470	520.5
471	522
472	492.6
473	491.8
474	482.8
475	461.7
476	465.8
477	457.9
478	438.5
479	429.3
480	429
481	420.8
482	421.7
483	419.6
484	410.8
485	395.1
486	378.5
487	370.5
488	366.9
489	367.2
490	358
491	365.9
492	344.9
493	329.1
494	337.2
495	317.8
496	315.2
497	296.4
498	313.8
499	290.8
500	292.6
501	290.8
502	281.5
503	270.9
504	262.2
505	263.8
506	271.6
507	246.4
508	242.5
509	259.3
510	260.6
511	245.9
512	243.7
513	228.6
514	234.5
515	231.4
516	250.3
517	225.6
518	228.1
519	226.1
520	227.4
521	210.4
522	217.5
523	193.3
524	214.3
525	201.3
526	199.7
527	202.7
528	194.2
529	184.2
530	194.7
531	203.1
532	172.8
533	188.1
534	190.3
535	180.9
536	177
537	182.6
538	170.1
539	166.3
540	168.5

## Sheet: Figure S7(c)
200	-2.617
201	-2.686
202	-2.738
203	-2.804
204	-2.847
205	-2.895
206	-2.957
207	-3.011
208	-3.061
209	-3.125
210	-3.192
211	-3.248
212	-3.291
213	-3.332
214	-3.399
215	-3.439
216	-3.489
217	-3.521
218	-3.548
219	-3.57
220	-3.594
221	-3.626
222	-3.642
223	-3.655
224	-3.657
225	-3.676
226	-3.683
227	-3.691
228	-3.679
229	-3.646
230	-3.534
231	-3.339
232	-3.055
233	-2.74
234	-2.402
235	-2.094
236	-1.821
237	-1.569
238	-1.357
239	-1.185
240	-1.044
241	-0.928
242	-0.835
243	-0.759
244	-0.698
245	-0.652
246	-0.617
247	-0.59
248	-0.569
249	-0.553
250	-0.543
251	-0.538
252	-0.536
253	-0.534
254	-0.532
255	-0.532
256	-0.536
257	-0.544
258	-0.553
259	-0.559
260	-0.562
261	-0.565
262	-0.571
263	-0.581
264	-0.593
265	-0.602
266	-0.609
267	-0.618
268	-0.628
269	-0.637
270	-0.644
271	-0.652
272	-0.663
273	-0.673
274	-0.683
275	-0.692
276	-0.697
277	-0.698
278	-0.695
279	-0.688
280	-0.68
281	-0.672
282	-0.664
283	-0.652
284	-0.634
285	-0.607
286	-0.574
287	-0.538
288	-0.501
289	-0.47
290	-0.441
291	-0.413
292	-0.388
293	-0.366
294	-0.345
295	-0.327
296	-0.313
297	-0.299
298	-0.287
299	-0.276
300	-0.265
301	-0.255
302	-0.245
303	-0.236
304	-0.226
305	-0.218
306	-0.21
307	-0.202
308	-0.194
309	-0.186
310	-0.179
311	-0.172
312	-0.165
313	-0.158
314	-0.152
315	-0.145
316	-0.139
317	-0.134
318	-0.128
319	-0.123
320	-0.118
321	-0.113
322	-0.109
323	-0.105
324	-0.1
325	-0.097
326	-0.093
327	-0.089
328	-0.086
329	-0.083
330	-0.08
331	-0.077
332	-0.074
333	-0.072
334	-0.069
335	-0.067
336	-0.065
337	-0.062
338	-0.06
339	-0.058
340	-0.056
341	-0.055
342	-0.053
343	-0.052
344	-0.05
345	-0.049
346	-0.048
347	-0.047
348	-0.045
349	-0.044
350	-0.043
351	-0.042
352	-0.041
353	-0.04
354	-0.039
355	-0.039
356	-0.038
357	-0.037
358	-0.036
359	-0.036
360	-0.035
361	-0.034
362	-0.034
363	-0.033
364	-0.032
365	-0.032
366	-0.031
367	-0.031
368	-0.03
369	-0.029
370	-0.029
371	-0.028
372	-0.028
373	-0.028
374	-0.028
375	-0.027
376	-0.027
377	-0.026
378	-0.026
379	-0.025
380	-0.025
381	-0.024
382	-0.024
383	-0.024
384	-0.023
385	-0.023
386	-0.022
387	-0.022
388	-0.022
389	-0.021
390	-0.021
391	-0.021
392	-0.02
393	-0.02
394	-0.02
395	-0.019
396	-0.019
397	-0.019
398	-0.019
399	-0.018
400	-0.018
401	-0.018
402	-0.018
403	-0.017
404	-0.017
405	-0.017
406	-0.017
407	-0.016
408	-0.016
409	-0.016
410	-0.016
411	-0.015
412	-0.015
413	-0.015
414	-0.015
415	-0.015
416	-0.014
417	-0.014
418	-0.013
419	-0.013
420	-0.013
421	-0.013
422	-0.013
423	-0.013
424	-0.012
425	-0.012
426	-0.012
427	-0.012
428	-0.012
429	-0.012
430	-0.012
431	-0.011
432	-0.011
433	-0.011
434	-0.011
435	-0.011
436	-0.011
437	-0.011
438	-0.011
439	-0.011
440	-0.01
441	-0.01
442	-0.01
443	-0.01
444	-0.01
445	-0.01
446	-0.01
447	-0.01
448	-0.01
449	-0.01
450	-0.009
451	-0.009
452	-0.009
453	-0.009
454	-0.009
455	-0.009
456	-0.009
457	-0.009
458	-0.009
459	-0.009
460	-0.009
461	-0.009
462	-0.009
463	-0.009
464	-0.009
465	-0.009
466	-0.009
467	-0.009
468	-0.008
469	-0.008
470	-0.008
471	-0.008
472	-0.008
473	-0.008
474	-0.008
475	-0.008
476	-0.008
477	-0.008
478	-0.008
479	-0.008
480	-0.008
481	-0.008
482	-0.008
483	-0.008
484	-0.008
485	-0.008
486	-0.008
487	-0.008
488	-0.008
489	-0.008
490	-0.007
491	-0.007
492	-0.007
493	-0.008
494	-0.008
495	-0.007
496	-0.007
497	-0.007
498	-0.007
499	-0.007
500	-0.007

## Sheet: Figure S7(d)
-2.82878	0
57.3463	6
117.521	9
177.696	10
237.872	9
298.047	26
358.222	32
418.397	46
478.572	46
538.747	45
598.922	22
659.097	40
719.272	48
779.447	93
839.622	260
899.797	765
959.972	1009
1020.15	718
1080.32	404
1140.5	266
1200.67	206
1260.85	159
1321.02	206
1381.2	190
1441.37	240
1501.55	357
1561.72	578
1621.9	862
1682.07	1123
1742.25	1355
1802.42	1525
1862.6	1508
1922.77	1401
1982.95	1293
2043.12	1160
2103.3	1007
2163.47	763
2223.65	693
2283.82	551
2344	447
2404.17	370
2464.35	308
2524.52	286
2584.7	239
2644.87	203
2705.05	164
2765.22	151
2825.4	123
2885.58	113
2945.75	133
3005.93	84
3066.1	97
3126.28	86
3186.45	75
3246.63	67
3306.8	59
3366.98	39
3427.15	34
3487.33	39
3547.5	43
3607.68	39
3667.85	30
3728.03	37
3788.2	28
3848.38	23
3908.55	31
3968.73	24
4028.9	16
4089.08	13
4149.25	8
4209.43	17
4269.6	15
4329.78	16
4389.95	11
4450.13	5
4510.3	13
4570.48	12
4630.65	9
4690.83	8
4751	8
4811.18	6
4871.35	9
4931.53	4
4991.7	6
5051.88	8
5112.05	6
5172.23	4
5232.4	5
5292.58	2
5352.75	8
5412.93	3
5473.1	5
5533.28	1
5593.45	3
5653.63	0
5713.8	6
5773.98	5
5834.15	2
5894.33	3
5954.5	1
6014.68	1
