# Supplementary material for: In-depth chiral sensing capability of C-dots in a biomimetic protein-based hydrogel: a probe for chiral recognition applications
Source: Royal Society of Chemistry journal article supplement (doi:10.1039/d5bm01508a), 2026-01-01
Supplement: d5bm01508a1.zip [file Figure S8.xlsx]

## Sheet: Figure S8(a)
-1.4975	-4.90417e-05	-1.4975	-8.02704e-05	-1.4975	-9.99969e-05
-1.49506	-3.92334e-05	-1.49506	-6.92139e-05	-1.49506	-9.57031e-05
-1.49261	-3.43475e-05	-1.49261	-6.21643e-05	-1.49261	-8.73413e-05
-1.49017	-3.13171e-05	-1.49017	-5.71289e-05	-1.49017	-8.13293e-05
-1.48773	-2.91687e-05	-1.48773	-5.32227e-05	-1.48773	-7.65991e-05
-1.48529	-2.7533e-05	-1.48529	-5.00488e-05	-1.48529	-7.27234e-05
-1.48285	-2.61871e-05	-1.48285	-4.74609e-05	-1.48285	-6.94885e-05
-1.48041	-2.50793e-05	-1.48041	-4.51935e-05	-1.48041	-6.67114e-05
-1.47797	-2.4115e-05	-1.47797	-4.32129e-05	-1.47797	-6.42395e-05
-1.47552	-2.32513e-05	-1.47552	-4.14612e-05	-1.47552	-6.20728e-05
-1.47308	-2.24823e-05	-1.47308	-3.98834e-05	-1.47308	-6.00891e-05
-1.47064	-2.17987e-05	-1.47064	-3.82904e-05	-1.47064	-5.82886e-05
-1.4682	-2.11823e-05	-1.4682	-3.69965e-05	-1.4682	-5.66406e-05
-1.46576	-2.06055e-05	-1.46576	-3.58246e-05	-1.46576	-5.51453e-05
-1.46332	-2.00623e-05	-1.46332	-3.4729e-05	-1.46332	-5.37415e-05
-1.46088	-1.95618e-05	-1.46088	-3.3725e-05	-1.46088	-5.24292e-05
-1.45844	-1.90918e-05	-1.45844	-3.2785e-05	-1.45844	-5.12085e-05
-1.45599	-1.86646e-05	-1.45599	-3.19092e-05	-1.45599	-5.00488e-05
-1.45355	-1.82404e-05	-1.45355	-3.1076e-05	-1.45355	-4.90082e-05
-1.45111	-1.78467e-05	-1.45111	-3.0304e-05	-1.45111	-4.79828e-05
-1.44867	-1.74835e-05	-1.44867	-2.95624e-05	-1.44867	-4.6991e-05
-1.44623	-1.71326e-05	-1.44623	-2.88696e-05	-1.44623	-4.60602e-05
-1.44379	-1.67908e-05	-1.44379	-2.82043e-05	-1.44379	-4.51721e-05
-1.44135	-1.64764e-05	-1.44135	-2.75757e-05	-1.44135	-4.41284e-05
-1.4389	-1.61652e-05	-1.4389	-2.69714e-05	-1.4389	-4.33136e-05
-1.43646	-1.58722e-05	-1.43646	-2.63947e-05	-1.43646	-4.25293e-05
-1.43402	-1.55853e-05	-1.43402	-2.58423e-05	-1.43402	-4.17664e-05
-1.43158	-1.53168e-05	-1.43158	-2.53174e-05	-1.43158	-4.10492e-05
-1.42914	-1.50513e-05	-1.42914	-2.48047e-05	-1.42914	-4.03351e-05
-1.4267	-1.4801e-05	-1.4267	-2.43225e-05	-1.4267	-3.96637e-05
-1.42426	-1.45538e-05	-1.42426	-2.38495e-05	-1.42426	-3.90015e-05
-1.42181	-1.43188e-05	-1.42181	-2.34009e-05	-1.42181	-3.8385e-05
-1.41937	-1.409e-05	-1.41937	-2.29614e-05	-1.41937	-3.77777e-05
-1.41693	-1.38702e-05	-1.41693	-2.25433e-05	-1.41693	-3.71857e-05
-1.41449	-1.36597e-05	-1.41449	-2.21313e-05	-1.41449	-3.66089e-05
-1.41205	-1.34552e-05	-1.41205	-2.17407e-05	-1.41205	-3.60535e-05
-1.40961	-1.32507e-05	-1.40961	-2.13531e-05	-1.40961	-3.5498e-05
-1.40717	-1.30615e-05	-1.40717	-2.099e-05	-1.40717	-3.49731e-05
-1.40472	-1.28632e-05	-1.40472	-2.06268e-05	-1.40472	-3.44513e-05
-1.40228	-1.26862e-05	-1.40228	-2.0285e-05	-1.40228	-3.39447e-05
-1.39984	-1.25061e-05	-1.39984	-1.99463e-05	-1.39984	-3.34564e-05
-1.3974	-1.23291e-05	-1.3974	-1.96167e-05	-1.3974	-3.29803e-05
-1.39496	-1.2149e-05	-1.39496	-1.92963e-05	-1.39496	-3.25073e-05
-1.39252	-1.19934e-05	-1.39252	-1.8988e-05	-1.39252	-3.20618e-05
-1.39008	-1.18317e-05	-1.39008	-1.86829e-05	-1.39008	-3.16071e-05
-1.38763	-1.1673e-05	-1.38763	-1.83899e-05	-1.38763	-3.11798e-05
-1.38519	-1.15112e-05	-1.38519	-1.81e-05	-1.38519	-3.07526e-05
-1.38275	-1.13739e-05	-1.38275	-1.78253e-05	-1.38275	-3.03436e-05
-1.38031	-1.12183e-05	-1.38031	-1.75537e-05	-1.38031	-2.99316e-05
-1.37787	-1.10748e-05	-1.37787	-1.72882e-05	-1.37787	-2.9541e-05
-1.37543	-1.09283e-05	-1.37543	-1.70227e-05	-1.37543	-2.91443e-05
-1.37299	-1.0791e-05	-1.37299	-1.67725e-05	-1.37299	-2.8775e-05
-1.37054	-1.06537e-05	-1.37054	-1.65222e-05	-1.37054	-2.83936e-05
-1.3681	-1.05286e-05	-1.3681	-1.62842e-05	-1.3681	-2.80304e-05
-1.36566	-1.03943e-05	-1.36566	-1.60461e-05	-1.36566	-2.76672e-05
-1.36322	-1.02722e-05	-1.36322	-1.58142e-05	-1.36322	-2.73163e-05
-1.36078	-1.01532e-05	-1.36078	-1.55884e-05	-1.36078	-2.69714e-05
-1.35834	-1.0025e-05	-1.35834	-1.53656e-05	-1.35834	-2.66296e-05
-1.3559	-9.90601e-06	-1.3559	-1.51489e-05	-1.3559	-2.62878e-05
-1.35345	-9.79919e-06	-1.35345	-1.49414e-05	-1.35345	-2.59674e-05
-1.35101	-9.68018e-06	-1.35101	-1.47308e-05	-1.35101	-2.56409e-05
-1.34857	-9.57642e-06	-1.34857	-1.45325e-05	-1.34857	-2.53296e-05
-1.34613	-9.4635e-06	-1.34613	-1.43311e-05	-1.34613	-2.50122e-05
-1.34369	-9.35364e-06	-1.34369	-1.41388e-05	-1.34369	-2.4707e-05
-1.34125	-9.24683e-06	-1.34125	-1.39465e-05	-1.34125	-2.4408e-05
-1.33881	-9.14917e-06	-1.33881	-1.37573e-05	-1.33881	-2.4118e-05
-1.33636	-9.04236e-06	-1.33636	-1.35742e-05	-1.33636	-2.38281e-05
-1.33392	-8.94775e-06	-1.33392	-1.33972e-05	-1.33392	-2.35443e-05
-1.33148	-8.84399e-06	-1.33148	-1.32202e-05	-1.33148	-2.32666e-05
-1.32904	-8.75244e-06	-1.32904	-1.30493e-05	-1.32904	-2.29889e-05
-1.3266	-8.66089e-06	-1.3266	-1.28784e-05	-1.3266	-2.27203e-05
-1.32416	-8.56628e-06	-1.32416	-1.27106e-05	-1.32416	-2.24609e-05
-1.32172	-8.47778e-06	-1.32172	-1.25488e-05	-1.32172	-2.21954e-05
-1.31927	-8.38928e-06	-1.31927	-1.23871e-05	-1.31927	-2.1933e-05
-1.31683	-8.30078e-06	-1.31683	-1.22284e-05	-1.31683	-2.16797e-05
-1.31439	-8.21533e-06	-1.31439	-1.20758e-05	-1.31439	-2.14325e-05
-1.31195	-8.12988e-06	-1.31195	-1.19202e-05	-1.31195	-2.11853e-05
-1.30951	-8.05054e-06	-1.30951	-1.17737e-05	-1.30951	-2.09442e-05
-1.30707	-7.96814e-06	-1.30707	-1.16241e-05	-1.30707	-2.07031e-05
-1.30463	-7.88879e-06	-1.30463	-1.14838e-05	-1.30463	-2.04712e-05
-1.30219	-7.8125e-06	-1.30219	-1.13403e-05	-1.30219	-2.02332e-05
-1.29974	-7.73315e-06	-1.29974	-1.1203e-05	-1.29974	-2.00073e-05
-1.2973	-7.65381e-06	-1.2973	-1.10657e-05	-1.2973	-1.97723e-05
-1.29486	-7.58667e-06	-1.29486	-1.09314e-05	-1.29486	-1.95465e-05
-1.29242	-7.51038e-06	-1.29242	-1.07971e-05	-1.29242	-1.93268e-05
-1.28998	-7.43713e-06	-1.28998	-1.06689e-05	-1.28998	-1.91101e-05
-1.28754	-7.36694e-06	-1.28754	-1.05377e-05	-1.28754	-1.88843e-05
-1.2851	-7.2937e-06	-1.2851	-1.04156e-05	-1.2851	-1.86768e-05
-1.28265	-7.22961e-06	-1.28265	-1.02936e-05	-1.28265	-1.84631e-05
-1.28021	-7.15942e-06	-1.28021	-1.01746e-05	-1.28021	-1.82465e-05
-1.27777	-7.09229e-06	-1.27777	-1.00464e-05	-1.27777	-1.8042e-05
-1.27533	-7.0282e-06	-1.27533	-9.93652e-06	-1.27533	-1.78375e-05
-1.27289	-6.96106e-06	-1.27289	-9.8175e-06	-1.27289	-1.7627e-05
-1.27045	-6.90002e-06	-1.27045	-9.70459e-06	-1.27045	-1.74286e-05
-1.26801	-6.83594e-06	-1.26801	-9.59167e-06	-1.26801	-1.72211e-05
-1.26556	-6.7749e-06	-1.26556	-9.48181e-06	-1.26556	-1.70227e-05
-1.26312	-6.71082e-06	-1.26312	-9.37195e-06	-1.26312	-1.68304e-05
-1.26068	-6.65283e-06	-1.26068	-9.26819e-06	-1.26068	-1.66351e-05
-1.25824	-6.5918e-06	-1.25824	-9.15833e-06	-1.25824	-1.64398e-05
-1.2558	-6.53687e-06	-1.2558	-9.05762e-06	-1.2558	-1.62476e-05
-1.25336	-6.47888e-06	-1.25336	-8.95386e-06	-1.25336	-1.60583e-05
-1.25092	-6.41785e-06	-1.25092	-8.8562e-06	-1.25092	-1.58783e-05
-1.24847	-6.35986e-06	-1.24847	-8.75854e-06	-1.24847	-1.56891e-05
-1.24603	-6.30798e-06	-1.24603	-8.66089e-06	-1.24603	-1.5509e-05
-1.24359	-6.25e-06	-1.24359	-8.56628e-06	-1.24359	-1.53259e-05
-1.24115	-6.19507e-06	-1.24115	-8.47168e-06	-1.24115	-1.51459e-05
-1.23871	-6.14014e-06	-1.23871	-8.37708e-06	-1.23871	-1.49689e-05
-1.23627	-6.08826e-06	-1.23627	-8.28857e-06	-1.23627	-1.4798e-05
-1.23383	-6.03638e-06	-1.23383	-8.19702e-06	-1.23383	-1.46179e-05
-1.23138	-5.98755e-06	-1.23138	-8.10852e-06	-1.23138	-1.44501e-05
-1.22894	-5.93262e-06	-1.22894	-8.02002e-06	-1.22894	-1.42761e-05
-1.2265	-5.88379e-06	-1.2265	-7.93762e-06	-1.2265	-1.41113e-05
-1.22406	-5.83496e-06	-1.22406	-7.84912e-06	-1.22406	-1.39435e-05
-1.22162	-5.78918e-06	-1.22162	-7.76978e-06	-1.22162	-1.37787e-05
-1.21918	-5.7373e-06	-1.21918	-7.68433e-06	-1.21918	-1.36078e-05
-1.21674	-5.69153e-06	-1.21674	-7.60498e-06	-1.21674	-1.34491e-05
-1.21429	-5.64575e-06	-1.21429	-7.52258e-06	-1.21429	-1.32843e-05
-1.21185	-5.59692e-06	-1.21185	-7.44324e-06	-1.21185	-1.31287e-05
-1.20941	-5.55725e-06	-1.20941	-7.36694e-06	-1.20941	-1.297e-05
-1.20697	-5.51147e-06	-1.20697	-7.29065e-06	-1.20697	-1.28143e-05
-1.20453	-5.4657e-06	-1.20453	-7.21436e-06	-1.20453	-1.26556e-05
-1.20209	-5.42603e-06	-1.20209	-7.14111e-06	-1.20209	-1.25031e-05
-1.19965	-5.3772e-06	-1.19965	-7.06482e-06	-1.19965	-1.23444e-05
-1.1972	-5.33752e-06	-1.1972	-6.99158e-06	-1.1972	-1.21979e-05
-1.19476	-5.2948e-06	-1.19476	-6.92139e-06	-1.19476	-1.20392e-05
-1.19232	-5.25513e-06	-1.19232	-6.85425e-06	-1.19232	-1.18896e-05
-1.18988	-5.2124e-06	-1.18988	-6.78101e-06	-1.18988	-1.17371e-05
-1.18744	-5.17273e-06	-1.18744	-6.71387e-06	-1.18744	-1.15906e-05
-1.185	-5.13e-06	-1.185	-6.64368e-06	-1.185	-1.14471e-05
-1.18256	-5.09338e-06	-1.18256	-6.57654e-06	-1.18256	-1.12976e-05
-1.18011	-5.05066e-06	-1.18011	-6.5094e-06	-1.18011	-1.11511e-05
-1.17767	-5.01404e-06	-1.17767	-6.44836e-06	-1.17767	-1.10107e-05
-1.17523	-4.97437e-06	-1.17523	-6.38123e-06	-1.17523	-1.08643e-05
-1.17279	-4.93774e-06	-1.17279	-6.32019e-06	-1.17279	-1.07208e-05
-1.17035	-4.90417e-06	-1.17035	-6.2561e-06	-1.17035	-1.05774e-05
-1.16791	-4.8645e-06	-1.16791	-6.19507e-06	-1.16791	-1.0437e-05
-1.16547	-4.83093e-06	-1.16547	-6.13403e-06	-1.16547	-1.02936e-05
-1.16302	-4.79248e-06	-1.16302	-6.073e-06	-1.16302	-1.01532e-05
-1.16058	-4.75708e-06	-1.16058	-6.01196e-06	-1.16058	-1.00189e-05
-1.15814	-4.72443e-06	-1.15814	-5.95703e-06	-1.15814	-9.87854e-06
-1.1557	-4.69025e-06	-1.1557	-5.896e-06	-1.1557	-9.74121e-06
-1.15326	-4.65515e-06	-1.15326	-5.84106e-06	-1.15326	-9.60388e-06
-1.15082	-4.62494e-06	-1.15082	-5.78003e-06	-1.15082	-9.4696e-06
-1.14838	-4.58954e-06	-1.14838	-5.7251e-06	-1.14838	-9.33838e-06
-1.14594	-4.55933e-06	-1.14594	-5.67017e-06	-1.14594	-9.20715e-06
-1.14349	-4.52606e-06	-1.14349	-5.61829e-06	-1.14349	-9.07593e-06
-1.14105	-4.48975e-06	-1.14105	-5.5603e-06	-1.14105	-8.94165e-06
-1.13861	-4.46045e-06	-1.13861	-5.51147e-06	-1.13861	-8.81348e-06
-1.13617	-4.42657e-06	-1.13617	-5.45654e-06	-1.13617	-8.68225e-06
-1.13373	-4.3988e-06	-1.13373	-5.40466e-06	-1.13373	-8.55713e-06
-1.13129	-4.3692e-06	-1.13129	-5.35278e-06	-1.13129	-8.42896e-06
-1.12885	-4.33655e-06	-1.12885	-5.30396e-06	-1.12885	-8.30688e-06
-1.1264	-4.31244e-06	-1.1264	-5.25513e-06	-1.1264	-8.18176e-06
-1.12396	-4.27795e-06	-1.12396	-5.2063e-06	-1.12396	-8.05969e-06
-1.12152	-4.2511e-06	-1.12152	-5.15442e-06	-1.12152	-7.93762e-06
-1.11908	-4.2215e-06	-1.11908	-5.10864e-06	-1.11908	-7.81555e-06
-1.11664	-4.19281e-06	-1.11664	-5.05676e-06	-1.11664	-7.69348e-06
-1.1142	-4.1684e-06	-1.1142	-5.01404e-06	-1.1142	-7.57751e-06
-1.11176	-4.13849e-06	-1.11176	-4.96521e-06	-1.11176	-7.4585e-06
-1.10931	-4.11163e-06	-1.10931	-4.91943e-06	-1.10931	-7.34863e-06
-1.10687	-4.08508e-06	-1.10687	-4.87366e-06	-1.10687	-7.22961e-06
-1.10443	-4.06006e-06	-1.10443	-4.83093e-06	-1.10443	-7.1167e-06
-1.10199	-4.02924e-06	-1.10199	-4.78516e-06	-1.10199	-7.00378e-06
-1.09955	-4.00757e-06	-1.09955	-4.74426e-06	-1.09955	-6.89392e-06
-1.09711	-3.97949e-06	-1.09711	-4.70154e-06	-1.09711	-6.78406e-06
-1.09467	-3.95508e-06	-1.09467	-4.65637e-06	-1.09467	-6.67725e-06
-1.09222	-3.92914e-06	-1.09222	-4.61517e-06	-1.09222	-6.57043e-06
-1.08978	-3.90564e-06	-1.08978	-4.5752e-06	-1.08978	-6.46362e-06
-1.08734	-3.87878e-06	-1.08734	-4.53339e-06	-1.08734	-6.35986e-06
-1.0849	-3.85712e-06	-1.0849	-4.49158e-06	-1.0849	-6.25916e-06
-1.08246	-3.83301e-06	-1.08246	-4.45129e-06	-1.08246	-6.1554e-06
-1.08002	-3.80707e-06	-1.08002	-4.41101e-06	-1.08002	-6.05774e-06
-1.07758	-3.78387e-06	-1.07758	-4.37134e-06	-1.07758	-5.95703e-06
-1.07513	-3.76343e-06	-1.07513	-4.3335e-06	-1.07513	-5.85938e-06
-1.07269	-3.7384e-06	-1.07269	-4.29291e-06	-1.07269	-5.76477e-06
-1.07025	-3.71552e-06	-1.07025	-4.2569e-06	-1.07025	-5.67017e-06
-1.06781	-3.69415e-06	-1.06781	-4.22058e-06	-1.06781	-5.57556e-06
-1.06537	-3.67065e-06	-1.06537	-4.18213e-06	-1.06537	-5.48401e-06
-1.06293	-3.64655e-06	-1.06293	-4.1449e-06	-1.06293	-5.39551e-06
-1.06049	-3.62823e-06	-1.06049	-4.10889e-06	-1.06049	-5.30701e-06
-1.05804	-3.60382e-06	-1.05804	-4.07318e-06	-1.05804	-5.21851e-06
-1.0556	-3.58307e-06	-1.0556	-4.0387e-06	-1.0556	-5.13e-06
-1.05316	-3.56323e-06	-1.05316	-4.00269e-06	-1.05316	-5.04456e-06
-1.05072	-3.54218e-06	-1.05072	-3.96942e-06	-1.05072	-4.96216e-06
-1.04828	-3.5199e-06	-1.04828	-3.93646e-06	-1.04828	-4.87976e-06
-1.04584	-3.49792e-06	-1.04584	-3.90228e-06	-1.04584	-4.79736e-06
-1.0434	-3.47626e-06	-1.0434	-3.86871e-06	-1.0434	-4.71497e-06
-1.04095	-3.45947e-06	-1.04095	-3.83514e-06	-1.04095	-4.63562e-06
-1.03851	-3.43719e-06	-1.03851	-3.80249e-06	-1.03851	-4.55811e-06
-1.03607	-3.41919e-06	-1.03607	-3.77014e-06	-1.03607	-4.48578e-06
-1.03363	-3.39752e-06	-1.03363	-3.73688e-06	-1.03363	-4.40979e-06
-1.03119	-3.37921e-06	-1.03119	-3.70789e-06	-1.03119	-4.33655e-06
-1.02875	-3.36212e-06	-1.02875	-3.67676e-06	-1.02875	-4.26544e-06
-1.02631	-3.33862e-06	-1.02631	-3.64716e-06	-1.02631	-4.19403e-06
-1.02386	-3.32123e-06	-1.02386	-3.61237e-06	-1.02386	-4.12323e-06
-1.02142	-3.302e-06	-1.02142	-3.58551e-06	-1.02142	-4.0567e-06
-1.01898	-3.28461e-06	-1.01898	-3.55499e-06	-1.01898	-3.98682e-06
-1.01654	-3.26599e-06	-1.01654	-3.52539e-06	-1.01654	-3.92609e-06
-1.0141	-3.24554e-06	-1.0141	-3.4964e-06	-1.0141	-3.86292e-06
-1.01166	-3.22845e-06	-1.01166	-3.47015e-06	-1.01166	-3.79913e-06
-1.00922	-3.21014e-06	-1.00922	-3.43964e-06	-1.00922	-3.74115e-06
-1.00677	-3.19275e-06	-1.00677	-3.41248e-06	-1.00677	-3.68134e-06
-1.00433	-3.17261e-06	-1.00433	-3.38257e-06	-1.00433	-3.62152e-06
-1.00189	-3.15643e-06	-1.00189	-3.35602e-06	-1.00189	-3.56964e-06
-0.99945	-3.13782e-06	-0.99945	-3.32703e-06	-0.99945	-3.51501e-06
-0.99701	-3.12164e-06	-0.99701	-3.30292e-06	-0.99701	-3.46039e-06
-0.99457	-3.10455e-06	-0.99457	-3.27484e-06	-0.99457	-3.40576e-06
-0.99213	-3.08685e-06	-0.99213	-3.24982e-06	-0.99213	-3.35632e-06
-0.98969	-3.07098e-06	-0.98969	-3.22693e-06	-0.98969	-3.30688e-06
-0.98724	-3.05389e-06	-0.98724	-3.19946e-06	-0.98724	-3.25836e-06
-0.9848	-3.03589e-06	-0.9848	-3.17261e-06	-0.9848	-3.21014e-06
-0.98236	-3.02155e-06	-0.98236	-3.15063e-06	-0.98236	-3.1665e-06
-0.97992	-3.00323e-06	-0.97992	-3.12378e-06	-0.97992	-3.12012e-06
-0.97748	-2.98859e-06	-0.97748	-3.10059e-06	-0.97748	-3.07465e-06
-0.97504	-2.97058e-06	-0.97504	-3.07556e-06	-0.97504	-3.03467e-06
-0.9726	-2.95685e-06	-0.9726	-3.05267e-06	-0.9726	-2.99255e-06
-0.97015	-2.93762e-06	-0.97015	-3.02948e-06	-0.97015	-2.95105e-06
-0.96771	-2.92297e-06	-0.96771	-3.00659e-06	-0.96771	-2.9071e-06
-0.96527	-2.90466e-06	-0.96527	-2.98401e-06	-0.96527	-2.86957e-06
-0.96283	-2.89185e-06	-0.96283	-2.96143e-06	-0.96283	-2.83051e-06
-0.96039	-2.87354e-06	-0.96039	-2.9364e-06	-0.96039	-2.79144e-06
-0.95795	-2.85919e-06	-0.95795	-2.91748e-06	-0.95795	-2.75452e-06
-0.95551	-2.84302e-06	-0.95551	-2.89612e-06	-0.95551	-2.71606e-06
-0.95306	-2.82623e-06	-0.95306	-2.87384e-06	-0.95306	-2.68127e-06
-0.95062	-2.81342e-06	-0.95062	-2.85278e-06	-0.95062	-2.64648e-06
-0.94818	-2.79663e-06	-0.94818	-2.83264e-06	-0.94818	-2.60773e-06
-0.94574	-2.77924e-06	-0.94574	-2.80914e-06	-0.94574	-2.57385e-06
-0.9433	-2.76703e-06	-0.9433	-2.79144e-06	-0.9433	-2.54333e-06
-0.94086	-2.75146e-06	-0.94086	-2.77039e-06	-0.94086	-2.50671e-06
-0.93842	-2.7356e-06	-0.93842	-2.75146e-06	-0.93842	-2.47589e-06
-0.93597	-2.72125e-06	-0.93597	-2.73102e-06	-0.93597	-2.44141e-06
-0.93353	-2.7066e-06	-0.93353	-2.71301e-06	-0.93353	-2.41394e-06
-0.93109	-2.69073e-06	-0.93109	-2.69531e-06	-0.93109	-2.37885e-06
-0.92865	-2.677e-06	-0.92865	-2.67609e-06	-0.92865	-2.34863e-06
-0.92621	-2.66357e-06	-0.92621	-2.65808e-06	-0.92621	-2.32025e-06
-0.92377	-2.64954e-06	-0.92377	-2.63855e-06	-0.92377	-2.29248e-06
-0.92133	-2.63306e-06	-0.92133	-2.61932e-06	-0.92133	-2.26379e-06
-0.91888	-2.62177e-06	-0.91888	-2.60315e-06	-0.91888	-2.23602e-06
-0.91644	-2.6062e-06	-0.91644	-2.58636e-06	-0.91644	-2.20825e-06
-0.914	-2.59369e-06	-0.914	-2.56989e-06	-0.914	-2.18658e-06
-0.91156	-2.57904e-06	-0.91156	-2.55035e-06	-0.91156	-2.15851e-06
-0.90912	-2.56622e-06	-0.90912	-2.53662e-06	-0.90912	-2.13257e-06
-0.90668	-2.55035e-06	-0.90668	-2.51862e-06	-0.90668	-2.10724e-06
-0.90424	-2.53632e-06	-0.90424	-2.50183e-06	-0.90424	-2.08557e-06
-0.90179	-2.52289e-06	-0.90179	-2.48444e-06	-0.90179	-2.05841e-06
-0.89935	-2.51007e-06	-0.89935	-2.47009e-06	-0.89935	-2.03491e-06
-0.89691	-2.49481e-06	-0.89691	-2.45392e-06	-0.89691	-2.01019e-06
-0.89447	-2.48322e-06	-0.89447	-2.44019e-06	-0.89447	-1.98883e-06
-0.89203	-2.46948e-06	-0.89203	-2.42249e-06	-0.89203	-1.96655e-06
-0.88959	-2.45728e-06	-0.88959	-2.40662e-06	-0.88959	-1.94275e-06
-0.88715	-2.44324e-06	-0.88715	-2.39044e-06	-0.88715	-1.92139e-06
-0.8847	-2.43103e-06	-0.8847	-2.37762e-06	-0.8847	-1.90521e-06
-0.88226	-2.41455e-06	-0.88226	-2.36053e-06	-0.88226	-1.87836e-06
-0.87982	-2.40448e-06	-0.87982	-2.34924e-06	-0.87982	-1.86249e-06
-0.87738	-2.39136e-06	-0.87738	-2.33276e-06	-0.87738	-1.84204e-06
-0.87494	-2.37854e-06	-0.87494	-2.31964e-06	-0.87494	-1.8222e-06
-0.8725	-2.36755e-06	-0.8725	-2.30591e-06	-0.8725	-1.80298e-06
-0.87006	-2.35474e-06	-0.87006	-2.28943e-06	-0.87006	-1.78223e-06
-0.86761	-2.33887e-06	-0.86761	-2.276e-06	-0.86761	-1.76575e-06
-0.86517	-2.32666e-06	-0.86517	-2.26318e-06	-0.86517	-1.74713e-06
-0.86273	-2.31537e-06	-0.86273	-2.24792e-06	-0.86273	-1.72821e-06
-0.86029	-2.30347e-06	-0.86029	-2.23572e-06	-0.86029	-1.71173e-06
-0.85785	-2.29126e-06	-0.85785	-2.2229e-06	-0.85785	-1.69342e-06
-0.85541	-2.27753e-06	-0.85541	-2.21161e-06	-0.85541	-1.67969e-06
-0.85297	-2.26746e-06	-0.85297	-2.19757e-06	-0.85297	-1.65985e-06
-0.85052	-2.25525e-06	-0.85052	-2.1814e-06	-0.85052	-1.64368e-06
-0.84808	-2.2403e-06	-0.84808	-2.16766e-06	-0.84808	-1.62628e-06
-0.84564	-2.23145e-06	-0.84564	-2.15851e-06	-0.84564	-1.6095e-06
-0.8432	-2.2171e-06	-0.8432	-2.14172e-06	-0.8432	-1.59637e-06
-0.84076	-2.20642e-06	-0.84076	-2.13135e-06	-0.84076	-1.58142e-06
-0.83832	-2.19299e-06	-0.83832	-2.11853e-06	-0.83832	-1.56677e-06
-0.83588	-2.18231e-06	-0.83588	-2.10663e-06	-0.83588	-1.55243e-06
-0.83344	-2.17072e-06	-0.83344	-2.09442e-06	-0.83344	-1.53748e-06
-0.83099	-2.1579e-06	-0.83099	-2.08313e-06	-0.83099	-1.52466e-06
-0.82855	-2.1463e-06	-0.82855	-2.06818e-06	-0.82855	-1.50848e-06
-0.82611	-2.13379e-06	-0.82611	-2.05933e-06	-0.82611	-1.4975e-06
-0.82367	-2.12494e-06	-0.82367	-2.04498e-06	-0.82367	-1.48315e-06
-0.82123	-2.11273e-06	-0.82123	-2.0343e-06	-0.82123	-1.47064e-06
-0.81879	-2.09839e-06	-0.81879	-2.02148e-06	-0.81879	-1.45813e-06
-0.81635	-2.08771e-06	-0.81635	-2.01019e-06	-0.81635	-1.44653e-06
-0.8139	-2.07916e-06	-0.8139	-1.99707e-06	-0.8139	-1.43219e-06
-0.81146	-2.06879e-06	-0.81146	-1.98608e-06	-0.81146	-1.41968e-06
-0.80902	-2.05353e-06	-0.80902	-1.97357e-06	-0.80902	-1.40686e-06
-0.80658	-2.04224e-06	-0.80658	-1.96503e-06	-0.80658	-1.39374e-06
-0.80414	-2.03003e-06	-0.80414	-1.95038e-06	-0.80414	-1.38336e-06
-0.8017	-2.01965e-06	-0.8017	-1.94122e-06	-0.8017	-1.37238e-06
-0.79926	-2.00806e-06	-0.79926	-1.92688e-06	-0.79926	-1.36078e-06
-0.79681	-1.99799e-06	-0.79681	-1.91681e-06	-0.79681	-1.3501e-06
-0.79437	-1.98395e-06	-0.79437	-1.90491e-06	-0.79437	-1.33942e-06
-0.79193	-1.97388e-06	-0.79193	-1.89606e-06	-0.79193	-1.32843e-06
-0.78949	-1.96259e-06	-0.78949	-1.88385e-06	-0.78949	-1.31744e-06
-0.78705	-1.95099e-06	-0.78705	-1.87256e-06	-0.78705	-1.30829e-06
-0.78461	-1.9397e-06	-0.78461	-1.85974e-06	-0.78461	-1.29791e-06
-0.78217	-1.92963e-06	-0.78217	-1.85059e-06	-0.78217	-1.28784e-06
-0.77972	-1.91742e-06	-0.77972	-1.83807e-06	-0.77972	-1.27808e-06
-0.77728	-1.90735e-06	-0.77728	-1.82922e-06	-0.77728	-1.27045e-06
-0.77484	-1.89545e-06	-0.77484	-1.81641e-06	-0.77484	-1.25824e-06
-0.7724	-1.88293e-06	-0.7724	-1.8045e-06	-0.7724	-1.25427e-06
-0.76996	-1.87286e-06	-0.76996	-1.79382e-06	-0.76996	-1.24023e-06
-0.76752	-1.85944e-06	-0.76752	-1.78497e-06	-0.76752	-1.23352e-06
-0.76508	-1.84937e-06	-0.76508	-1.77246e-06	-0.76508	-1.22131e-06
-0.76263	-1.83777e-06	-0.76263	-1.76208e-06	-0.76263	-1.21552e-06
-0.76019	-1.82587e-06	-0.76019	-1.75171e-06	-0.76019	-1.20575e-06
-0.75775	-1.81854e-06	-0.75775	-1.74316e-06	-0.75775	-1.1969e-06
-0.75531	-1.8045e-06	-0.75531	-1.72943e-06	-0.75531	-1.19049e-06
-0.75287	-1.79291e-06	-0.75287	-1.72058e-06	-0.75287	-1.18011e-06
-0.75043	-1.78284e-06	-0.75043	-1.70746e-06	-0.75043	-1.1734e-06
-0.74799	-1.77307e-06	-0.74799	-1.69861e-06	-0.74799	-1.16364e-06
-0.74554	-1.76208e-06	-0.74554	-1.68762e-06	-0.74554	-1.15631e-06
-0.7431	-1.75018e-06	-0.7431	-1.67694e-06	-0.7431	-1.14807e-06
-0.74066	-1.73859e-06	-0.74066	-1.66595e-06	-0.74066	-1.14014e-06
-0.73822	-1.72943e-06	-0.73822	-1.65588e-06	-0.73822	-1.13373e-06
-0.73578	-1.71753e-06	-0.73578	-1.6452e-06	-0.73578	-1.12488e-06
-0.73334	-1.70685e-06	-0.73334	-1.63269e-06	-0.73334	-1.11633e-06
-0.7309	-1.69556e-06	-0.7309	-1.62354e-06	-0.7309	-1.11145e-06
-0.72845	-1.68427e-06	-0.72845	-1.61438e-06	-0.72845	-1.10687e-06
-0.72601	-1.67175e-06	-0.72601	-1.60339e-06	-0.72601	-1.09833e-06
-0.72357	-1.6629e-06	-0.72357	-1.59332e-06	-0.72357	-1.091e-06
-0.72113	-1.651e-06	-0.72113	-1.58173e-06	-0.72113	-1.08337e-06
-0.71869	-1.6394e-06	-0.71869	-1.57318e-06	-0.71869	-1.07605e-06
-0.71625	-1.62903e-06	-0.71625	-1.56158e-06	-0.71625	-1.07117e-06
-0.71381	-1.61804e-06	-0.71381	-1.55304e-06	-0.71381	-1.06476e-06
-0.71136	-1.60767e-06	-0.71136	-1.54358e-06	-0.71136	-1.05774e-06
-0.70892	-1.59698e-06	-0.70892	-1.53351e-06	-0.70892	-1.05286e-06
-0.70648	-1.5863e-06	-0.70648	-1.52191e-06	-0.70648	-1.04645e-06
-0.70404	-1.57593e-06	-0.70404	-1.51337e-06	-0.70404	-1.04126e-06
-0.7016	-1.56494e-06	-0.7016	-1.50391e-06	-0.7016	-1.03333e-06
-0.69916	-1.55518e-06	-0.69916	-1.49536e-06	-0.69916	-1.026e-06
-0.69672	-1.54358e-06	-0.69672	-1.4859e-06	-0.69672	-1.02081e-06
-0.69427	-1.5332e-06	-0.69427	-1.47614e-06	-0.69427	-1.01379e-06
-0.69183	-1.52222e-06	-0.69183	-1.46606e-06	-0.69183	-1.008e-06
-0.68939	-1.51245e-06	-0.68939	-1.4563e-06	-0.68939	-1.00433e-06
-0.68695	-1.50085e-06	-0.68695	-1.44775e-06	-0.68695	-9.95789e-07
-0.68451	-1.49048e-06	-0.68451	-1.44012e-06	-0.68451	-9.91821e-07
-0.68207	-1.48132e-06	-0.68207	-1.43036e-06	-0.68207	-9.84192e-07
-0.67963	-1.46973e-06	-0.67963	-1.4209e-06	-0.67963	-9.76868e-07
-0.67719	-1.45996e-06	-0.67719	-1.41235e-06	-0.67719	-9.71375e-07
-0.67474	-1.44928e-06	-0.67474	-1.40228e-06	-0.67474	-9.68018e-07
-0.6723	-1.43738e-06	-0.6723	-1.39313e-06	-0.6723	-9.59473e-07
-0.66986	-1.42975e-06	-0.66986	-1.38519e-06	-0.66986	-9.54285e-07
-0.66742	-1.41754e-06	-0.66742	-1.37451e-06	-0.66742	-9.48181e-07
-0.66498	-1.40594e-06	-0.66498	-1.36688e-06	-0.66498	-9.40552e-07
-0.66254	-1.39862e-06	-0.66254	-1.36017e-06	-0.66254	-9.36584e-07
-0.6601	-1.38702e-06	-0.6601	-1.35132e-06	-0.6601	-9.29565e-07
-0.65765	-1.37634e-06	-0.65765	-1.34308e-06	-0.65765	-9.25293e-07
-0.65521	-1.3678e-06	-0.65521	-1.33575e-06	-0.65521	-9.17358e-07
-0.65277	-1.35651e-06	-0.65277	-1.32355e-06	-0.65277	-9.1095e-07
-0.65033	-1.34827e-06	-0.65033	-1.31775e-06	-0.65033	-9.04846e-07
-0.64789	-1.33759e-06	-0.64789	-1.30859e-06	-0.64789	-9.00879e-07
-0.64545	-1.32813e-06	-0.64545	-1.30096e-06	-0.64545	-8.94165e-07
-0.64301	-1.31653e-06	-0.64301	-1.29181e-06	-0.64301	-8.86536e-07
-0.64056	-1.30585e-06	-0.64056	-1.28601e-06	-0.64056	-8.80432e-07
-0.63812	-1.297e-06	-0.63812	-1.27747e-06	-0.63812	-8.73718e-07
-0.63568	-1.28723e-06	-0.63568	-1.26923e-06	-0.63568	-8.6853e-07
-0.63324	-1.27777e-06	-0.63324	-1.25916e-06	-0.63324	-8.61206e-07
-0.6308	-1.26526e-06	-0.6308	-1.25275e-06	-0.6308	-8.57849e-07
-0.62836	-1.25824e-06	-0.62836	-1.24512e-06	-0.62836	-8.48389e-07
-0.62592	-1.24847e-06	-0.62592	-1.23627e-06	-0.62592	-8.44421e-07
-0.62347	-1.2381e-06	-0.62347	-1.22864e-06	-0.62347	-8.38318e-07
-0.62103	-1.22894e-06	-0.62103	-1.22192e-06	-0.62103	-8.31909e-07
-0.61859	-1.21826e-06	-0.61859	-1.21399e-06	-0.61859	-8.26111e-07
-0.61615	-1.20758e-06	-0.61615	-1.20667e-06	-0.61615	-8.20007e-07
-0.61371	-1.19812e-06	-0.61371	-1.19904e-06	-0.61371	-8.12378e-07
-0.61127	-1.18988e-06	-0.61127	-1.19263e-06	-0.61127	-8.09326e-07
-0.60883	-1.18011e-06	-0.60883	-1.18073e-06	-0.60883	-8.01697e-07
-0.60638	-1.16913e-06	-0.60638	-1.17432e-06	-0.60638	-7.9834e-07
-0.60394	-1.15967e-06	-0.60394	-1.16669e-06	-0.60394	-7.901e-07
-0.6015	-1.15021e-06	-0.6015	-1.16089e-06	-0.6015	-7.84302e-07
-0.59906	-1.14166e-06	-0.59906	-1.15326e-06	-0.59906	-7.79419e-07
-0.59662	-1.13312e-06	-0.59662	-1.1441e-06	-0.59662	-7.72705e-07
-0.59418	-1.12396e-06	-0.59418	-1.13495e-06	-0.59418	-7.67517e-07
-0.59174	-1.11542e-06	-0.59174	-1.12915e-06	-0.59174	-7.60498e-07
-0.58929	-1.10291e-06	-0.58929	-1.12122e-06	-0.58929	-7.5592e-07
-0.58685	-1.09589e-06	-0.58685	-1.1142e-06	-0.58685	-7.51953e-07
-0.58441	-1.08459e-06	-0.58441	-1.10779e-06	-0.58441	-7.44629e-07
-0.58197	-1.07666e-06	-0.58197	-1.09985e-06	-0.58197	-7.40967e-07
-0.57953	-1.06628e-06	-0.57953	-1.09314e-06	-0.57953	-7.33337e-07
-0.57709	-1.05713e-06	-0.57709	-1.08459e-06	-0.57709	-7.28149e-07
-0.57465	-1.04767e-06	-0.57465	-1.07758e-06	-0.57465	-7.20825e-07
-0.5722	-1.03851e-06	-0.5722	-1.06903e-06	-0.5722	-7.14417e-07
-0.56976	-1.02997e-06	-0.56976	-1.06293e-06	-0.56976	-7.09229e-07
-0.56732	-1.02203e-06	-0.56732	-1.05713e-06	-0.56732	-7.04346e-07
-0.56488	-1.01257e-06	-0.56488	-1.04797e-06	-0.56488	-6.96411e-07
-0.56244	-1.00342e-06	-0.56244	-1.04218e-06	-0.56244	-6.92139e-07
-0.56	-9.94263e-07	-0.56	-1.03485e-06	-0.56	-6.86646e-07
-0.55756	-9.84802e-07	-0.55756	-1.02844e-06	-0.55756	-6.79626e-07
-0.55511	-9.76257e-07	-0.55511	-1.01959e-06	-0.55511	-6.74133e-07
-0.55267	-9.67407e-07	-0.55267	-1.01257e-06	-0.55267	-6.6925e-07
-0.55023	-9.57947e-07	-0.55023	-1.00647e-06	-0.55023	-6.64063e-07
-0.54779	-9.49707e-07	-0.54779	-9.99756e-07	-0.54779	-6.5979e-07
-0.54535	-9.39941e-07	-0.54535	-9.91211e-07	-0.54535	-6.5033e-07
-0.54291	-9.31396e-07	-0.54291	-9.85718e-07	-0.54291	-6.49109e-07
-0.54047	-9.21326e-07	-0.54047	-9.79309e-07	-0.54047	-6.41785e-07
-0.53802	-9.13696e-07	-0.53802	-9.7229e-07	-0.53802	-6.37512e-07
-0.53558	-9.05762e-07	-0.53558	-9.6405e-07	-0.53558	-6.29578e-07
-0.53314	-8.97522e-07	-0.53314	-9.58862e-07	-0.53314	-6.26221e-07
-0.5307	-8.87451e-07	-0.5307	-9.50928e-07	-0.5307	-6.18591e-07
-0.52826	-8.81042e-07	-0.52826	-9.46045e-07	-0.52826	-6.14624e-07
-0.52582	-8.70667e-07	-0.52582	-9.39026e-07	-0.52582	-6.08521e-07
-0.52338	-8.62122e-07	-0.52338	-9.32312e-07	-0.52338	-6.04553e-07
-0.52094	-8.53882e-07	-0.52094	-9.24377e-07	-0.52094	-5.9906e-07
-0.51849	-8.45642e-07	-0.51849	-9.18579e-07	-0.51849	-5.91736e-07
-0.51605	-8.38318e-07	-0.51605	-9.12781e-07	-0.51605	-5.85632e-07
-0.51361	-8.31299e-07	-0.51361	-9.05457e-07	-0.51361	-5.82581e-07
-0.51117	-8.22144e-07	-0.51117	-8.99048e-07	-0.51117	-5.76172e-07
-0.50873	-8.13904e-07	-0.50873	-8.92639e-07	-0.50873	-5.70984e-07
-0.50629	-8.02917e-07	-0.50629	-8.84705e-07	-0.50629	-5.66406e-07
-0.50385	-7.94983e-07	-0.50385	-8.77075e-07	-0.50385	-5.61218e-07
-0.5014	-7.85217e-07	-0.5014	-8.72192e-07	-0.5014	-5.55725e-07
-0.49896	-7.78809e-07	-0.49896	-8.64868e-07	-0.49896	-5.48401e-07
-0.49652	-7.70264e-07	-0.49652	-8.58154e-07	-0.49652	-5.43518e-07
-0.49408	-7.62634e-07	-0.49408	-8.52661e-07	-0.49408	-5.38025e-07
-0.49164	-7.54089e-07	-0.49164	-8.44421e-07	-0.49164	-5.32227e-07
-0.4892	-7.4707e-07	-0.4892	-8.38928e-07	-0.4892	-5.27649e-07
-0.48676	-7.35779e-07	-0.48676	-8.32825e-07	-0.48676	-5.21545e-07
-0.48431	-7.30896e-07	-0.48431	-8.27026e-07	-0.48431	-5.18188e-07
-0.48187	-7.20825e-07	-0.48187	-8.21228e-07	-0.48187	-5.11169e-07
-0.47943	-7.13196e-07	-0.47943	-8.15125e-07	-0.47943	-5.06897e-07
-0.47699	-7.05566e-07	-0.47699	-8.0719e-07	-0.47699	-5.02014e-07
-0.47455	-6.97021e-07	-0.47455	-7.99866e-07	-0.47455	-4.9469e-07
-0.47211	-6.88782e-07	-0.47211	-7.94067e-07	-0.47211	-4.88586e-07
-0.46967	-6.80237e-07	-0.46967	-7.89795e-07	-0.46967	-4.82483e-07
-0.46722	-6.70776e-07	-0.46722	-7.82776e-07	-0.46722	-4.77905e-07
-0.46478	-6.65894e-07	-0.46478	-7.74841e-07	-0.46478	-4.73328e-07
-0.46234	-6.56128e-07	-0.46234	-7.67822e-07	-0.46234	-4.66858e-07
-0.4599	-6.47888e-07	-0.4599	-7.61108e-07	-0.4599	-4.61609e-07
-0.45746	-6.39343e-07	-0.45746	-7.547e-07	-0.45746	-4.55017e-07
-0.45502	-6.32019e-07	-0.45502	-7.49817e-07	-0.45502	-4.5105e-07
-0.45258	-6.2439e-07	-0.45258	-7.41882e-07	-0.45258	-4.43573e-07
-0.45013	-6.1615e-07	-0.45013	-7.36694e-07	-0.45013	-4.40094e-07
-0.44769	-6.08215e-07	-0.44769	-7.29065e-07	-0.44769	-4.34113e-07
-0.44525	-5.97534e-07	-0.44525	-7.22351e-07	-0.44525	-4.29199e-07
-0.44281	-5.91431e-07	-0.44281	-7.19299e-07	-0.44281	-4.24316e-07
-0.44037	-5.82275e-07	-0.44037	-7.1228e-07	-0.44037	-4.19769e-07
-0.43793	-5.74341e-07	-0.43793	-7.04346e-07	-0.43793	-4.14154e-07
-0.43549	-5.65796e-07	-0.43549	-6.97632e-07	-0.43549	-4.09882e-07
-0.43304	-5.58472e-07	-0.43304	-6.90308e-07	-0.43304	-4.03381e-07
-0.4306	-5.49622e-07	-0.4306	-6.84814e-07	-0.4306	-3.99567e-07
-0.42816	-5.42603e-07	-0.42816	-6.78406e-07	-0.42816	-3.93158e-07
-0.42572	-5.35278e-07	-0.42572	-6.71692e-07	-0.42572	-3.90167e-07
-0.42328	-5.23682e-07	-0.42328	-6.65588e-07	-0.42328	-3.84338e-07
-0.42084	-5.18188e-07	-0.42084	-6.5918e-07	-0.42084	-3.78265e-07
-0.4184	-5.07813e-07	-0.4184	-6.5155e-07	-0.4184	-3.73413e-07
-0.41595	-5.00793e-07	-0.41595	-6.47278e-07	-0.41595	-3.70789e-07
-0.41351	-4.91638e-07	-0.41351	-6.39954e-07	-0.41351	-3.6557e-07
-0.41107	-4.84314e-07	-0.41107	-6.34155e-07	-0.41107	-3.59619e-07
-0.40863	-4.73022e-07	-0.40863	-6.28052e-07	-0.40863	-3.5318e-07
-0.40619	-4.64783e-07	-0.40619	-6.20728e-07	-0.40619	-3.50739e-07
-0.40375	-4.58374e-07	-0.40375	-6.14929e-07	-0.40375	-3.4433e-07
-0.40131	-4.49493e-07	-0.40131	-6.06995e-07	-0.40131	-3.40454e-07
-0.39886	-4.41162e-07	-0.39886	-6.00586e-07	-0.39886	-3.34564e-07
-0.39642	-4.33685e-07	-0.39642	-5.94482e-07	-0.39642	-3.29468e-07
-0.39398	-4.25629e-07	-0.39398	-5.87769e-07	-0.39398	-3.25043e-07
-0.39154	-4.1803e-07	-0.39154	-5.82886e-07	-0.39154	-3.20679e-07
-0.3891	-4.10583e-07	-0.3891	-5.76172e-07	-0.3891	-3.15338e-07
-0.38666	-4.01489e-07	-0.38666	-5.69458e-07	-0.38666	-3.10516e-07
-0.38422	-3.93036e-07	-0.38422	-5.6427e-07	-0.38422	-3.04535e-07
-0.38177	-3.85895e-07	-0.38177	-5.5603e-07	-0.38177	-3.00507e-07
-0.37933	-3.76099e-07	-0.37933	-5.51147e-07	-0.37933	-2.95837e-07
-0.37689	-3.68835e-07	-0.37689	-5.42603e-07	-0.37689	-2.91748e-07
-0.37445	-3.60596e-07	-0.37445	-5.37415e-07	-0.37445	-2.86316e-07
-0.37201	-3.51532e-07	-0.37201	-5.31921e-07	-0.37201	-2.80304e-07
-0.36957	-3.4433e-07	-0.36957	-5.25208e-07	-0.36957	-2.76215e-07
-0.36713	-3.37555e-07	-0.36713	-5.19714e-07	-0.36713	-2.70721e-07
-0.36469	-3.29956e-07	-0.36469	-5.13e-07	-0.36469	-2.66174e-07
-0.36224	-3.20831e-07	-0.36224	-5.05676e-07	-0.36224	-2.60345e-07
-0.3598	-3.14148e-07	-0.3598	-4.97742e-07	-0.3598	-2.5415e-07
-0.35736	-3.06213e-07	-0.35736	-4.93164e-07	-0.35736	-2.51099e-07
-0.35492	-2.97882e-07	-0.35492	-4.85229e-07	-0.35492	-2.46948e-07
-0.35248	-2.90497e-07	-0.35248	-4.79431e-07	-0.35248	-2.43774e-07
-0.35004	-2.82227e-07	-0.35004	-4.71191e-07	-0.35004	-2.35352e-07
-0.3476	-2.7652e-07	-0.3476	-4.65546e-07	-0.3476	-2.31781e-07
-0.34515	-2.67975e-07	-0.34515	-4.57886e-07	-0.34515	-2.25677e-07
-0.34271	-2.59491e-07	-0.34271	-4.51782e-07	-0.34271	-2.21436e-07
-0.34027	-2.52991e-07	-0.34027	-4.45526e-07	-0.34027	-2.14417e-07
-0.33783	-2.46002e-07	-0.33783	-4.39331e-07	-0.33783	-2.09686e-07
-0.33539	-2.37061e-07	-0.33539	-4.30359e-07	-0.33539	-2.04193e-07
-0.33295	-2.31995e-07	-0.33295	-4.25232e-07	-0.33295	-1.99738e-07
-0.33051	-2.24152e-07	-0.33051	-4.19312e-07	-0.33051	-1.95587e-07
-0.32806	-2.17102e-07	-0.32806	-4.11713e-07	-0.32806	-1.8869e-07
-0.32562	-2.09656e-07	-0.32562	-4.05609e-07	-0.32562	-1.84052e-07
-0.32318	-2.03888e-07	-0.32318	-3.99506e-07	-0.32318	-1.78345e-07
-0.32074	-1.95953e-07	-0.32074	-3.90411e-07	-0.32074	-1.7215e-07
-0.3183	-1.88934e-07	-0.3183	-3.85437e-07	-0.3183	-1.66718e-07
-0.31586	-1.81305e-07	-0.31586	-3.78052e-07	-0.31586	-1.62659e-07
-0.31342	-1.75293e-07	-0.31342	-3.7204e-07	-0.31342	-1.57593e-07
-0.31097	-1.68091e-07	-0.31097	-3.63495e-07	-0.31097	-1.51733e-07
-0.30853	-1.61499e-07	-0.30853	-3.56628e-07	-0.30853	-1.4566e-07
-0.30609	-1.55487e-07	-0.30609	-3.51288e-07	-0.30609	-1.40533e-07
-0.30365	-1.48926e-07	-0.30365	-3.41583e-07	-0.30365	-1.35895e-07
-0.30121	-1.42303e-07	-0.30121	-3.349e-07	-0.30121	-1.29761e-07
-0.29877	-1.36536e-07	-0.29877	-3.2843e-07	-0.29877	-1.22894e-07
-0.29633	-1.30402e-07	-0.29633	-3.21655e-07	-0.29633	-1.17859e-07
-0.29388	-1.22711e-07	-0.29388	-3.15186e-07	-0.29388	-1.1319e-07
-0.29144	-1.17523e-07	-0.29144	-3.06549e-07	-0.29144	-1.07605e-07
-0.289	-1.11053e-07	-0.289	-3.00476e-07	-0.289	-1.01532e-07
-0.28656	-1.05347e-07	-0.28656	-2.92938e-07	-0.28656	-9.67407e-08
-0.28412	-1.00037e-07	-0.28412	-2.86804e-07	-0.28412	-8.99658e-08
-0.28168	-9.37195e-08	-0.28168	-2.79602e-07	-0.28168	-8.40454e-08
-0.27924	-8.83179e-08	-0.27924	-2.71454e-07	-0.27924	-7.82166e-08
-0.27679	-8.15735e-08	-0.27679	-2.64191e-07	-0.27679	-7.36084e-08
-0.27435	-7.63245e-08	-0.27435	-2.56653e-07	-0.27435	-6.70776e-08
-0.27191	-7.08313e-08	-0.27191	-2.49725e-07	-0.27191	-6.43005e-08
-0.26947	-6.64063e-08	-0.26947	-2.43439e-07	-0.26947	-5.77393e-08
-0.26703	-6.03333e-08	-0.26703	-2.35382e-07	-0.26703	-5.01404e-08
-0.26459	-5.51147e-08	-0.26459	-2.28973e-07	-0.26459	-4.56238e-08
-0.26215	-5.06897e-08	-0.26215	-2.21375e-07	-0.26215	-3.7384e-08
-0.2597	-4.58374e-08	-0.2597	-2.14142e-07	-0.2597	-3.26843e-08
-0.25726	-3.84521e-08	-0.25726	-2.0578e-07	-0.25726	-2.5238e-08
-0.25482	-3.48206e-08	-0.25482	-1.99585e-07	-0.25482	-1.86157e-08
-0.25238	-2.8656e-08	-0.25238	-1.90582e-07	-0.25238	-1.31531e-08
-0.24994	-2.31323e-08	-0.24994	-1.83289e-07	-0.24994	-8.5144e-09
-0.2475	-1.83105e-08	-0.2475	-1.75842e-07	-0.2475	-2.10571e-09
-0.24506	-1.37329e-08	-0.24506	-1.69098e-07	-0.24506	3.87573e-09
-0.24261	-9.24683e-09	-0.24261	-1.62506e-07	-0.24261	1.03455e-08
-0.24017	-4.3335e-09	-0.24017	-1.54846e-07	-0.24017	1.5564e-08
-0.23773	-8.23975e-10	-0.23773	-1.47797e-07	-0.23773	2.24609e-08
-0.23529	4.02832e-09	-0.23529	-1.38123e-07	-0.23529	2.771e-08
-0.23285	8.63647e-09	-0.23285	-1.32599e-07	-0.23285	3.59802e-08
-0.23041	1.26343e-08	-0.23041	-1.24725e-07	-0.23041	4.1687e-08
-0.22797	1.76697e-08	-0.22797	-1.1795e-07	-0.22797	4.74854e-08
-0.22552	2.14539e-08	-0.22552	-1.08246e-07	-0.22552	5.44434e-08
-0.22308	2.68555e-08	-0.22308	-1.02997e-07	-0.22308	6.25305e-08
-0.22064	2.98767e-08	-0.22064	-9.6283e-08	-0.22064	6.71692e-08
-0.2182	3.55225e-08	-0.2182	-8.8623e-08	-0.2182	7.39441e-08
-0.21576	3.93372e-08	-0.21576	-8.21533e-08	-0.21576	8.22449e-08
-0.21332	4.44031e-08	-0.21332	-7.40356e-08	-0.21332	8.61511e-08
-0.21088	4.84924e-08	-0.21088	-6.72607e-08	-0.21088	9.14307e-08
-0.20844	5.23376e-08	-0.20844	-5.92346e-08	-0.20844	9.9762e-08
-0.20599	5.56641e-08	-0.20599	-5.2124e-08	-0.20599	1.0437e-07
-0.20355	6.04858e-08	-0.20355	-4.45862e-08	-0.20355	1.12e-07
-0.20111	6.57654e-08	-0.20111	-3.62244e-08	-0.20111	1.17554e-07
-0.19867	6.95496e-08	-0.19867	-2.8595e-08	-0.19867	1.24969e-07
-0.19623	7.33643e-08	-0.19623	-2.09656e-08	-0.19623	1.31592e-07
-0.19379	7.56836e-08	-0.19379	-1.48621e-08	-0.19379	1.3858e-07
-0.19135	7.91626e-08	-0.19135	-8.17871e-09	-0.19135	1.46057e-07
-0.1889	8.30078e-08	-0.1889	-1.52588e-09	-0.1889	1.51794e-07
-0.18646	8.76465e-08	-0.18646	5.95093e-09	-0.18646	1.59698e-07
-0.18402	9.05457e-08	-0.18402	1.31836e-08	-0.18402	1.66809e-07
-0.18158	9.35364e-08	-0.18158	2.01111e-08	-0.18158	1.73615e-07
-0.17914	9.78088e-08	-0.17914	2.81982e-08	-0.17914	1.81274e-07
-0.1767	1.01196e-07	-0.1767	3.31116e-08	-0.1767	1.86981e-07
-0.17426	1.05072e-07	-0.17426	4.12598e-08	-0.17426	1.95282e-07
-0.17181	1.07361e-07	-0.17181	4.83398e-08	-0.17181	2.02118e-07
-0.16937	1.11572e-07	-0.16937	5.65796e-08	-0.16937	2.09808e-07
-0.16693	1.15204e-07	-0.16693	6.22559e-08	-0.16693	2.18658e-07
-0.16449	1.18134e-07	-0.16449	7.02515e-08	-0.16449	2.25983e-07
-0.16205	1.2088e-07	-0.16205	7.76978e-08	-0.16205	2.32361e-07
-0.15961	1.25092e-07	-0.15961	8.52356e-08	-0.15961	2.39532e-07
-0.15717	1.27869e-07	-0.15717	9.08203e-08	-0.15717	2.47101e-07
-0.15472	1.315e-07	-0.15472	9.78088e-08	-0.15472	2.55676e-07
-0.15228	1.34491e-07	-0.15228	1.0498e-07	-0.15228	2.63153e-07
-0.14984	1.3678e-07	-0.14984	1.1264e-07	-0.14984	2.70844e-07
-0.1474	1.40442e-07	-0.1474	1.1908e-07	-0.1474	2.78931e-07
-0.14496	1.43555e-07	-0.14496	1.25427e-07	-0.14496	2.87231e-07
-0.14252	1.46729e-07	-0.14252	1.32233e-07	-0.14252	2.95624e-07
-0.14008	1.49597e-07	-0.14008	1.40167e-07	-0.14008	3.05267e-07
-0.13763	1.52344e-07	-0.13763	1.44501e-07	-0.13763	3.12744e-07
-0.13519	1.56982e-07	-0.13519	1.53107e-07	-0.13519	3.21442e-07
-0.13275	1.58997e-07	-0.13275	1.6037e-07	-0.13275	3.30688e-07
-0.13031	1.6217e-07	-0.13031	1.67389e-07	-0.13031	3.36578e-07
-0.12787	1.6391e-07	-0.12787	1.73676e-07	-0.12787	3.46039e-07
-0.12543	1.67511e-07	-0.12543	1.78253e-07	-0.12543	3.54462e-07
-0.12299	1.71143e-07	-0.12299	1.86279e-07	-0.12299	3.64685e-07
-0.12054	1.73431e-07	-0.12054	1.94733e-07	-0.12054	3.7323e-07
-0.1181	1.76819e-07	-0.1181	2.0105e-07	-0.1181	3.83087e-07
-0.11566	1.81e-07	-0.11566	2.08832e-07	-0.11566	3.927e-07
-0.11322	1.83685e-07	-0.11322	2.13715e-07	-0.11322	3.99231e-07
-0.11078	1.86371e-07	-0.11078	2.21527e-07	-0.11078	4.10004e-07
-0.10834	1.89667e-07	-0.10834	2.26898e-07	-0.10834	4.18396e-07
-0.1059	1.91895e-07	-0.1059	2.34314e-07	-0.1059	4.29138e-07
-0.10345	1.95129e-07	-0.10345	2.41852e-07	-0.10345	4.38232e-07
-0.10101	1.9809e-07	-0.10101	2.49451e-07	-0.10101	4.4812e-07
-0.09857	2.00439e-07	-0.09857	2.54639e-07	-0.09857	4.5639e-07
-0.09613	2.03735e-07	-0.09613	2.6236e-07	-0.09613	4.67194e-07
-0.09369	2.05902e-07	-0.09369	2.68768e-07	-0.09369	4.75952e-07
-0.09125	2.0874e-07	-0.09125	2.76276e-07	-0.09125	4.86694e-07
-0.08881	2.12433e-07	-0.08881	2.82715e-07	-0.08881	4.96368e-07
-0.08636	2.1463e-07	-0.08636	2.90527e-07	-0.08636	5.06927e-07
-0.08392	2.17896e-07	-0.08392	2.97516e-07	-0.08392	5.17517e-07
-0.08148	2.2049e-07	-0.08148	3.04138e-07	-0.08148	5.29266e-07
-0.07904	2.23663e-07	-0.07904	3.10181e-07	-0.07904	5.37903e-07
-0.0766	2.26379e-07	-0.0766	3.18878e-07	-0.0766	5.48798e-07
-0.07416	2.29797e-07	-0.07416	3.23975e-07	-0.07416	5.59631e-07
-0.07172	2.323e-07	-0.07172	3.32184e-07	-0.07172	5.70251e-07
-0.06927	2.35718e-07	-0.06927	3.3905e-07	-0.06927	5.82092e-07
-0.06683	2.37457e-07	-0.06683	3.45398e-07	-0.06683	5.94971e-07
-0.06439	2.39563e-07	-0.06439	3.53088e-07	-0.06439	6.03485e-07
-0.06195	2.43713e-07	-0.06195	3.60046e-07	-0.06195	6.14624e-07
-0.05951	2.45178e-07	-0.05951	3.68164e-07	-0.05951	6.23779e-07
-0.05707	2.48444e-07	-0.05707	3.75031e-07	-0.05707	6.37207e-07
-0.05463	2.50977e-07	-0.05463	3.83087e-07	-0.05463	6.47583e-07
-0.05219	2.53326e-07	-0.05219	3.90442e-07	-0.05219	6.58875e-07
-0.04974	2.56622e-07	-0.04974	3.97705e-07	-0.04974	6.69556e-07
-0.0473	2.59033e-07	-0.0473	4.05273e-07	-0.0473	6.81152e-07
-0.04486	2.61444e-07	-0.04486	4.14124e-07	-0.04486	6.94885e-07
-0.04242	2.65747e-07	-0.04242	4.2038e-07	-0.04242	7.07397e-07
-0.03998	2.66998e-07	-0.03998	4.2749e-07	-0.03998	7.18384e-07
-0.03754	2.7124e-07	-0.03754	4.36188e-07	-0.03754	7.2998e-07
-0.0351	2.74536e-07	-0.0351	4.43939e-07	-0.0351	7.42493e-07
-0.03265	2.77008e-07	-0.03265	4.51294e-07	-0.03265	7.5592e-07
-0.03021	2.79602e-07	-0.03021	4.59106e-07	-0.03021	7.67822e-07
-0.02777	2.82776e-07	-0.02777	4.67804e-07	-0.02777	7.80334e-07
-0.02533	2.85645e-07	-0.02533	4.77173e-07	-0.02533	7.91626e-07
-0.02289	2.88269e-07	-0.02289	4.84436e-07	-0.02289	8.04749e-07
-0.02045	2.91718e-07	-0.02045	4.93011e-07	-0.02045	8.17871e-07
-0.01801	2.93518e-07	-0.01801	5.01221e-07	-0.01801	8.31604e-07
-0.01556	2.97058e-07	-0.01556	5.10437e-07	-0.01556	8.42896e-07
-0.01312	3.00049e-07	-0.01312	5.17548e-07	-0.01312	8.58765e-07
-0.01068	3.03955e-07	-0.01068	5.27191e-07	-0.01068	8.69446e-07
-0.00824	3.06946e-07	-0.00824	5.35553e-07	-0.00824	8.84705e-07
-0.0058	3.10577e-07	-0.0058	5.44098e-07	-0.0058	8.98438e-07
-0.00336	3.12988e-07	-0.00336	5.54565e-07	-0.00336	9.1217e-07
-0.000915527	3.16772e-07	-0.000915527	5.61584e-07	-0.000915527	9.26208e-07
0.00153	3.2019e-07	0.00153	5.7193e-07	0.00153	9.39636e-07
0.00397	3.22968e-07	0.00397	5.80688e-07	0.00397	9.53979e-07
0.00641	3.255e-07	0.00641	5.8905e-07	0.00641	9.67712e-07
0.00885	3.29895e-07	0.00885	5.99457e-07	0.00885	9.8175e-07
0.01129	3.33008e-07	0.01129	6.09711e-07	0.01129	9.97925e-07
0.01373	3.36395e-07	0.01373	6.18286e-07	0.01373	1.01074e-06
0.01617	3.40332e-07	0.01617	6.27136e-07	0.01617	1.02478e-06
0.01862	3.43597e-07	0.01862	6.38123e-07	0.01862	1.04156e-06
0.02106	3.4729e-07	0.02106	6.46362e-07	0.02106	1.05804e-06
0.0235	3.50403e-07	0.0235	6.58569e-07	0.0235	1.07147e-06
0.02594	3.54187e-07	0.02594	6.6925e-07	0.02594	1.08704e-06
0.02838	3.58307e-07	0.02838	6.79321e-07	0.02838	1.1026e-06
0.03082	3.61694e-07	0.03082	6.92139e-07	0.03082	1.11816e-06
0.03326	3.65265e-07	0.03326	7.00684e-07	0.03326	1.13525e-06
0.03571	3.69415e-07	0.03571	7.12891e-07	0.03571	1.15051e-06
0.03815	3.73749e-07	0.03815	7.24487e-07	0.03815	1.1676e-06
0.04059	3.76953e-07	0.04059	7.34863e-07	0.04059	1.18439e-06
0.04303	3.80859e-07	0.04303	7.4585e-07	0.04303	1.19934e-06
0.04547	3.85315e-07	0.04547	7.58362e-07	0.04547	1.21643e-06
0.04791	3.88702e-07	0.04791	7.71484e-07	0.04791	1.23383e-06
0.05035	3.93829e-07	0.05035	7.84607e-07	0.05035	1.25092e-06
0.0528	3.9856e-07	0.0528	7.94983e-07	0.0528	1.26892e-06
0.05524	4.02557e-07	0.05524	8.08716e-07	0.05524	1.28723e-06
0.05768	4.04999e-07	0.05768	8.20618e-07	0.05768	1.30402e-06
0.06012	4.10736e-07	0.06012	8.34656e-07	0.06012	1.32172e-06
0.06256	4.15436e-07	0.06256	8.46558e-07	0.06256	1.33881e-06
0.065	4.19098e-07	0.065	8.59985e-07	0.065	1.35773e-06
0.06744	4.2395e-07	0.06744	8.74023e-07	0.06744	1.37512e-06
0.06989	4.29382e-07	0.06989	8.88062e-07	0.06989	1.3974e-06
0.07233	4.33319e-07	0.07233	9.01794e-07	0.07233	1.41235e-06
0.07477	4.38446e-07	0.07477	9.18884e-07	0.07477	1.43494e-06
0.07721	4.43207e-07	0.07721	9.31396e-07	0.07721	1.45233e-06
0.07965	4.47632e-07	0.07965	9.4574e-07	0.07965	1.47339e-06
0.08209	4.51874e-07	0.08209	9.60693e-07	0.08209	1.49261e-06
0.08453	4.58069e-07	0.08453	9.77478e-07	0.08453	1.51337e-06
0.08698	4.62891e-07	0.08698	9.93042e-07	0.08698	1.5332e-06
0.08942	4.67255e-07	0.08942	1.00861e-06	0.08942	1.55579e-06
0.09186	4.7226e-07	0.09186	1.02356e-06	0.09186	1.5741e-06
0.0943	4.78607e-07	0.0943	1.04248e-06	0.0943	1.59698e-06
0.09674	4.84039e-07	0.09674	1.05835e-06	0.09674	1.61835e-06
0.09918	4.90387e-07	0.09918	1.07635e-06	0.09918	1.6391e-06
0.10162	4.94843e-07	0.10162	1.09283e-06	0.10162	1.65894e-06
0.10406	5.00519e-07	0.10406	1.10962e-06	0.10406	1.68182e-06
0.10651	5.06287e-07	0.10651	1.12762e-06	0.10651	1.70197e-06
0.10895	5.12451e-07	0.10895	1.14502e-06	0.10895	1.72729e-06
0.11139	5.18097e-07	0.11139	1.16272e-06	0.11139	1.74744e-06
0.11383	5.2478e-07	0.11383	1.18256e-06	0.11383	1.77094e-06
0.11627	5.30823e-07	0.11627	1.20026e-06	0.11627	1.79291e-06
0.11871	5.36713e-07	0.11871	1.22009e-06	0.11871	1.81671e-06
0.12115	5.42633e-07	0.12115	1.2384e-06	0.12115	1.84113e-06
0.1236	5.49683e-07	0.1236	1.25946e-06	0.1236	1.86371e-06
0.12604	5.55573e-07	0.12604	1.28021e-06	0.12604	1.88873e-06
0.12848	5.62958e-07	0.12848	1.30188e-06	0.12848	1.91437e-06
0.13092	5.70038e-07	0.13092	1.32019e-06	0.13092	1.93604e-06
0.13336	5.76996e-07	0.13336	1.34369e-06	0.13336	1.96045e-06
0.1358	5.83649e-07	0.1358	1.36292e-06	0.1358	1.98608e-06
0.13824	5.90851e-07	0.13824	1.38702e-06	0.13824	2.01202e-06
0.14069	5.97595e-07	0.14069	1.40747e-06	0.14069	2.03644e-06
0.14313	6.06079e-07	0.14313	1.42914e-06	0.14313	2.06116e-06
0.14557	6.14929e-07	0.14557	1.45355e-06	0.14557	2.08649e-06
0.14801	6.21948e-07	0.14801	1.47583e-06	0.14801	2.11395e-06
0.15045	6.28662e-07	0.15045	1.50146e-06	0.15045	2.13898e-06
0.15289	6.36902e-07	0.15289	1.52496e-06	0.15289	2.16736e-06
0.15533	6.46057e-07	0.15533	1.54846e-06	0.15533	2.19177e-06
0.15778	6.52466e-07	0.15778	1.57379e-06	0.15778	2.21802e-06
0.16022	6.62537e-07	0.16022	1.59851e-06	0.16022	2.24518e-06
0.16266	6.69861e-07	0.16266	1.62323e-06	0.16266	2.2702e-06
0.1651	6.80237e-07	0.1651	1.64642e-06	0.1651	2.29797e-06
0.16754	6.90613e-07	0.16754	1.67511e-06	0.16754	2.32758e-06
0.16998	6.98242e-07	0.16998	1.70166e-06	0.16998	2.35046e-06
0.17242	7.07703e-07	0.17242	1.72852e-06	0.17242	2.37915e-06
0.17487	7.18689e-07	0.17487	1.75537e-06	0.17487	2.4057e-06
0.17731	7.25403e-07	0.17731	1.78314e-06	0.17731	2.43561e-06
0.17975	7.36694e-07	0.17975	1.81061e-06	0.17975	2.46063e-06
0.18219	7.4707e-07	0.18219	1.83807e-06	0.18219	2.48901e-06
0.18463	7.56836e-07	0.18463	1.86798e-06	0.18463	2.51495e-06
0.18707	7.66907e-07	0.18707	1.89697e-06	0.18707	2.54547e-06
0.18951	7.76978e-07	0.18951	1.92444e-06	0.18951	2.56958e-06
0.19196	7.87354e-07	0.19196	1.95618e-06	0.19196	2.60101e-06
0.1944	8.00171e-07	0.1944	1.98517e-06	0.1944	2.62665e-06
0.19684	8.12073e-07	0.19684	2.0163e-06	0.19684	2.6535e-06
0.19928	8.22754e-07	0.19928	2.04559e-06	0.19928	2.68097e-06
0.20172	8.32825e-07	0.20172	2.07672e-06	0.20172	2.70996e-06
0.20416	8.44116e-07	0.20416	2.11029e-06	0.20416	2.73499e-06
0.2066	8.58459e-07	0.2066	2.14264e-06	0.2066	2.76337e-06
0.20905	8.69141e-07	0.20905	2.17285e-06	0.20905	2.79022e-06
0.21149	8.82263e-07	0.21149	2.2052e-06	0.21149	2.81891e-06
0.21393	8.9447e-07	0.21393	2.23999e-06	0.21393	2.84332e-06
0.21637	9.07288e-07	0.21637	2.27386e-06	0.21637	2.87079e-06
0.21881	9.21326e-07	0.21881	2.30621e-06	0.21881	2.89642e-06
0.22125	9.32922e-07	0.22125	2.34009e-06	0.22125	2.92358e-06
0.22369	9.4635e-07	0.22369	2.37274e-06	0.22369	2.94922e-06
0.22614	9.60083e-07	0.22614	2.41058e-06	0.22614	2.97363e-06
0.22858	9.729e-07	0.22858	2.44507e-06	0.22858	2.99896e-06
0.23102	9.88464e-07	0.23102	2.48077e-06	0.23102	3.02368e-06
0.23346	1.00281e-06	0.23346	2.51526e-06	0.23346	3.04932e-06
0.2359	1.01685e-06	0.2359	2.55035e-06	0.2359	3.07373e-06
0.23834	1.0318e-06	0.23834	2.58728e-06	0.23834	3.09448e-06
0.24078	1.04614e-06	0.24078	2.6236e-06	0.24078	3.1192e-06
0.24323	1.06262e-06	0.24323	2.659e-06	0.24323	3.14117e-06
0.24567	1.0791e-06	0.24567	2.69562e-06	0.24567	3.16437e-06
0.24811	1.09283e-06	0.24811	2.73285e-06	0.24811	3.18451e-06
0.25055	1.10779e-06	0.25055	2.77222e-06	0.25055	3.20618e-06
0.25299	1.12488e-06	0.25299	2.80853e-06	0.25299	3.2254e-06
0.25543	1.14258e-06	0.25543	2.84668e-06	0.25543	3.24524e-06
0.25787	1.15753e-06	0.25787	2.88605e-06	0.25787	3.26447e-06
0.26031	1.17554e-06	0.26031	2.9248e-06	0.26031	3.28217e-06
0.26276	1.19202e-06	0.26276	2.96051e-06	0.26276	3.29926e-06
0.2652	1.21155e-06	0.2652	3.0014e-06	0.2652	3.31909e-06
0.26764	1.22681e-06	0.26764	3.03925e-06	0.26764	3.33588e-06
0.27008	1.24481e-06	0.27008	3.07922e-06	0.27008	3.35205e-06
0.27252	1.2619e-06	0.27252	3.11707e-06	0.27252	3.36456e-06
0.27496	1.28052e-06	0.27496	3.15491e-06	0.27496	3.38013e-06
0.2774	1.29822e-06	0.2774	3.19641e-06	0.2774	3.39539e-06
0.27985	1.31714e-06	0.27985	3.23395e-06	0.27985	3.40637e-06
0.28229	1.33545e-06	0.28229	3.27179e-06	0.28229	3.41736e-06
0.28473	1.35468e-06	0.28473	3.31421e-06	0.28473	3.42804e-06
0.28717	1.37299e-06	0.28717	3.35083e-06	0.28717	3.43658e-06
0.28961	1.39191e-06	0.28961	3.39172e-06	0.28961	3.44757e-06
0.29205	1.41144e-06	0.29205	3.42865e-06	0.29205	3.45428e-06
0.29449	1.43188e-06	0.29449	3.47137e-06	0.29449	3.46161e-06
0.29694	1.4505e-06	0.29694	3.50861e-06	0.29694	3.46649e-06
0.29938	1.47095e-06	0.29938	3.54767e-06	0.29938	3.47321e-06
0.30182	1.49078e-06	0.30182	3.58643e-06	0.30182	3.47809e-06
0.30426	1.51062e-06	0.30426	3.6261e-06	0.30426	3.48022e-06
0.3067	1.53137e-06	0.3067	3.66058e-06	0.3067	3.48389e-06
0.30914	1.55365e-06	0.30914	3.703e-06	0.30914	3.48663e-06
0.31158	1.57471e-06	0.31158	3.74054e-06	0.31158	3.4848e-06
0.31403	1.59424e-06	0.31403	3.77838e-06	0.31403	3.48755e-06
0.31647	1.61591e-06	0.31647	3.81622e-06	0.31647	3.48663e-06
0.31891	1.63696e-06	0.31891	3.85376e-06	0.31891	3.48267e-06
0.32135	1.65741e-06	0.32135	3.88824e-06	0.32135	3.48358e-06
0.32379	1.68091e-06	0.32379	3.9267e-06	0.32379	3.48236e-06
0.32623	1.70227e-06	0.32623	3.96332e-06	0.32623	3.47534e-06
0.32867	1.72363e-06	0.32867	3.99872e-06	0.32867	3.47229e-06
0.33112	1.74774e-06	0.33112	4.03412e-06	0.33112	3.46619e-06
0.33356	1.76819e-06	0.33356	4.07104e-06	0.33356	3.46069e-06
0.336	1.78986e-06	0.336	4.10339e-06	0.336	3.45367e-06
0.33844	1.81274e-06	0.33844	4.13757e-06	0.33844	3.44757e-06
0.34088	1.83594e-06	0.34088	4.17206e-06	0.34088	3.44086e-06
0.34332	1.85791e-06	0.34332	4.20471e-06	0.34332	3.43414e-06
0.34576	1.8811e-06	0.34576	4.23767e-06	0.34576	3.4259e-06
0.34821	1.90552e-06	0.34821	4.26819e-06	0.34821	3.41675e-06
0.35065	1.92749e-06	0.35065	4.29871e-06	0.35065	3.40759e-06
0.35309	1.95038e-06	0.35309	4.32861e-06	0.35309	3.39722e-06
0.35553	1.97357e-06	0.35553	4.35638e-06	0.35553	3.38684e-06
0.35797	1.99585e-06	0.35797	4.38599e-06	0.35797	3.37677e-06
0.36041	2.01843e-06	0.36041	4.41162e-06	0.36041	3.367e-06
0.36285	2.04285e-06	0.36285	4.44122e-06	0.36285	3.35876e-06
0.3653	2.06604e-06	0.3653	4.46503e-06	0.3653	3.34534e-06
0.36774	2.08832e-06	0.36774	4.49097e-06	0.36774	3.33893e-06
0.37018	2.11212e-06	0.37018	4.51477e-06	0.37018	3.32733e-06
0.37262	2.13593e-06	0.37262	4.53949e-06	0.37262	3.31696e-06
0.37506	2.15942e-06	0.37506	4.55719e-06	0.37506	3.30566e-06
0.3775	2.1814e-06	0.3775	4.57916e-06	0.3775	3.29529e-06
0.37994	2.2052e-06	0.37994	4.59747e-06	0.37994	3.28339e-06
0.38239	2.23022e-06	0.38239	4.617e-06	0.38239	3.27484e-06
0.38483	2.25311e-06	0.38483	4.63257e-06	0.38483	3.26324e-06
0.38727	2.27661e-06	0.38727	4.64783e-06	0.38727	3.25165e-06
0.38971	2.30011e-06	0.38971	4.66217e-06	0.38971	3.24219e-06
0.39215	2.32452e-06	0.39215	4.67255e-06	0.39215	3.23059e-06
0.39459	2.3468e-06	0.39459	4.68506e-06	0.39459	3.22113e-06
0.39703	2.3703e-06	0.39703	4.69482e-06	0.39703	3.21167e-06
0.39948	2.39471e-06	0.39948	4.70215e-06	0.39948	3.19824e-06
0.40192	2.41699e-06	0.40192	4.71008e-06	0.40192	3.19183e-06
0.40436	2.44049e-06	0.40436	4.71375e-06	0.40436	3.17963e-06
0.4068	2.46674e-06	0.4068	4.72015e-06	0.4068	3.17291e-06
0.40924	2.48962e-06	0.40924	4.72137e-06	0.40924	3.16284e-06
0.41168	2.51373e-06	0.41168	4.72198e-06	0.41168	3.15125e-06
0.41412	2.53662e-06	0.41412	4.72076e-06	0.41412	3.13965e-06
0.41656	2.55951e-06	0.41656	4.7171e-06	0.41656	3.13293e-06
0.41901	2.58331e-06	0.41901	4.71283e-06	0.41901	3.12592e-06
0.42145	2.60437e-06	0.42145	4.70764e-06	0.42145	3.11554e-06
0.42389	2.63031e-06	0.42389	4.70032e-06	0.42389	3.10791e-06
0.42633	2.65381e-06	0.42633	4.69238e-06	0.42633	3.10059e-06
0.42877	2.67639e-06	0.42877	4.67957e-06	0.42877	3.09357e-06
0.43121	2.70172e-06	0.43121	4.67041e-06	0.43121	3.08411e-06
0.43365	2.72308e-06	0.43365	4.65485e-06	0.43365	3.07678e-06
0.4361	2.74933e-06	0.4361	4.63989e-06	0.4361	3.06915e-06
0.43854	2.76947e-06	0.43854	4.62524e-06	0.43854	3.06366e-06
0.44098	2.79572e-06	0.44098	4.60846e-06	0.44098	3.05634e-06
0.44342	2.81799e-06	0.44342	4.5871e-06	0.44342	3.04962e-06
0.44586	2.84119e-06	0.44586	4.5694e-06	0.44586	3.0426e-06
0.4483	2.86377e-06	0.4483	4.54742e-06	0.4483	3.03711e-06
0.45074	2.88971e-06	0.45074	4.52515e-06	0.45074	3.03253e-06
0.45319	2.9126e-06	0.45319	4.50226e-06	0.45319	3.0249e-06
0.45563	2.93549e-06	0.45563	4.47937e-06	0.45563	3.02032e-06
0.45807	2.95837e-06	0.45807	4.45587e-06	0.45807	3.01544e-06
0.46051	2.98279e-06	0.46051	4.43176e-06	0.46051	3.00995e-06
0.46295	3.00537e-06	0.46295	4.40399e-06	0.46295	3.00354e-06
0.46539	3.02979e-06	0.46539	4.3811e-06	0.46539	3.00018e-06
0.46783	3.05298e-06	0.46783	4.35181e-06	0.46783	2.99255e-06
0.47028	3.0777e-06	0.47028	4.32465e-06	0.47028	2.99011e-06
0.47272	3.09937e-06	0.47272	4.29626e-06	0.47272	2.9834e-06
0.47516	3.12317e-06	0.47516	4.26819e-06	0.47516	2.9776e-06
0.4776	3.14636e-06	0.4776	4.24225e-06	0.4776	2.97485e-06
0.48004	3.17261e-06	0.48004	4.21356e-06	0.48004	2.9715e-06
0.48248	3.19397e-06	0.48248	4.18549e-06	0.48248	2.9657e-06
0.48492	3.22083e-06	0.48492	4.15466e-06	0.48492	2.96173e-06
0.48737	3.24188e-06	0.48737	4.1275e-06	0.48737	2.95502e-06
0.48981	3.26691e-06	0.48981	4.10065e-06	0.48981	2.95319e-06
0.49225	3.29071e-06	0.49225	4.0686e-06	0.49225	2.95105e-06
0.49469	3.3139e-06	0.49469	4.04236e-06	0.49469	2.94495e-06
0.49713	3.33618e-06	0.49713	4.01215e-06	0.49713	2.94373e-06
0.49957	3.35999e-06	0.49957	3.98712e-06	0.49957	2.94281e-06
0.50201	3.38318e-06	0.50201	3.95844e-06	0.50201	2.94006e-06
0.50446	3.40668e-06	0.50446	3.93158e-06	0.50446	2.9364e-06
0.5069	3.42957e-06	0.5069	3.90381e-06	0.5069	2.93732e-06
0.50934	3.45642e-06	0.50934	3.87695e-06	0.50934	2.93304e-06
0.51178	3.47809e-06	0.51178	3.84857e-06	0.51178	2.92938e-06
0.51422	3.50159e-06	0.51422	3.82294e-06	0.51422	2.93091e-06
0.51666	3.52509e-06	0.51666	3.79944e-06	0.51666	2.92999e-06
0.5191	3.5498e-06	0.5191	3.7738e-06	0.5191	2.93335e-06
0.52155	3.57147e-06	0.52155	3.74756e-06	0.52155	2.92877e-06
0.52399	3.5965e-06	0.52399	3.72406e-06	0.52399	2.92938e-06
0.52643	3.61816e-06	0.52643	3.69965e-06	0.52643	2.92755e-06
0.52887	3.64166e-06	0.52887	3.67767e-06	0.52887	2.92908e-06
0.53131	3.66272e-06	0.53131	3.65387e-06	0.53131	2.92694e-06
0.53375	3.6853e-06	0.53375	3.6322e-06	0.53375	2.92969e-06
0.53619	3.71033e-06	0.53619	3.60992e-06	0.53619	2.92969e-06
0.53864	3.73352e-06	0.53864	3.58795e-06	0.53864	2.93152e-06
0.54108	3.75427e-06	0.54108	3.56567e-06	0.54108	2.93121e-06
0.54352	3.77899e-06	0.54352	3.54828e-06	0.54352	2.92969e-06
0.54596	3.79852e-06	0.54596	3.52661e-06	0.54596	2.9303e-06
0.5484	3.82111e-06	0.5484	3.5083e-06	0.5484	2.92938e-06
0.55084	3.84308e-06	0.55084	3.48938e-06	0.55084	2.9306e-06
0.55328	3.86261e-06	0.55328	3.47107e-06	0.55328	2.93182e-06
0.55573	3.8855e-06	0.55573	3.45337e-06	0.55573	2.93335e-06
0.55817	3.90625e-06	0.55817	3.43781e-06	0.55817	2.93335e-06
0.56061	3.92731e-06	0.56061	3.41949e-06	0.56061	2.93274e-06
0.56305	3.94897e-06	0.56305	3.40393e-06	0.56305	2.93427e-06
0.56549	3.9679e-06	0.56549	3.38715e-06	0.56549	2.93488e-06
0.56793	3.98834e-06	0.56793	3.37189e-06	0.56793	2.93549e-06
0.57037	4.00635e-06	0.57037	3.35663e-06	0.57037	2.93518e-06
0.57281	4.02649e-06	0.57281	3.34106e-06	0.57281	2.93549e-06
0.57526	4.0451e-06	0.57526	3.32672e-06	0.57526	2.93549e-06
0.5777	4.06311e-06	0.5777	3.31543e-06	0.5777	2.94037e-06
0.58014	4.0802e-06	0.58014	3.30078e-06	0.58014	2.93884e-06
0.58258	4.09851e-06	0.58258	3.29071e-06	0.58258	2.94403e-06
0.58502	4.11438e-06	0.58502	3.27759e-06	0.58502	2.9425e-06
0.58746	4.13147e-06	0.58746	3.2666e-06	0.58746	2.94678e-06
0.5899	4.14764e-06	0.5899	3.25531e-06	0.5899	2.948e-06
0.59235	4.1626e-06	0.59235	3.2431e-06	0.59235	2.95074e-06
0.59479	4.17633e-06	0.59479	3.23273e-06	0.59479	2.95074e-06
0.59723	4.19067e-06	0.59723	3.2251e-06	0.59723	2.95441e-06
0.59967	4.20441e-06	0.59967	3.21411e-06	0.59967	2.95624e-06
0.60211	4.21875e-06	0.60211	3.20587e-06	0.60211	2.95898e-06
0.60455	4.22974e-06	0.60455	3.19458e-06	0.60455	2.95868e-06
0.60699	4.24255e-06	0.60699	3.18787e-06	0.60699	2.96478e-06
0.60944	4.25232e-06	0.60944	3.18054e-06	0.60944	2.96692e-06
0.61188	4.26208e-06	0.61188	3.17139e-06	0.61188	2.97058e-06
0.61432	4.27002e-06	0.61432	3.16437e-06	0.61432	2.97455e-06
0.61676	4.28223e-06	0.61676	3.15643e-06	0.61676	2.97821e-06
0.6192	4.28955e-06	0.6192	3.14972e-06	0.6192	2.97882e-06
0.62164	4.29626e-06	0.62164	3.14331e-06	0.62164	2.9834e-06
0.62408	4.30237e-06	0.62408	3.13782e-06	0.62408	2.98706e-06
0.62653	4.30878e-06	0.62653	3.1311e-06	0.62653	2.99164e-06
0.62897	4.31122e-06	0.62897	3.12531e-06	0.62897	2.99408e-06
0.63141	4.3161e-06	0.63141	3.11981e-06	0.63141	2.99988e-06
0.63385	4.32098e-06	0.63385	3.11554e-06	0.63385	3.00446e-06
0.63629	4.32159e-06	0.63629	3.10913e-06	0.63629	3.01086e-06
0.63873	4.32404e-06	0.63873	3.10455e-06	0.63873	3.01117e-06
0.64117	4.32495e-06	0.64117	3.10089e-06	0.64117	3.02002e-06
0.64362	4.32281e-06	0.64362	3.09418e-06	0.64362	3.02399e-06
0.64606	4.32556e-06	0.64606	3.09021e-06	0.64606	3.03314e-06
0.6485	4.32281e-06	0.6485	3.08563e-06	0.6485	3.03619e-06
0.65094	4.32068e-06	0.65094	3.08167e-06	0.65094	3.04321e-06
0.65338	4.31702e-06	0.65338	3.07983e-06	0.65338	3.0481e-06
0.65582	4.31427e-06	0.65582	3.07465e-06	0.65582	3.0542e-06
0.65826	4.30878e-06	0.65826	3.07068e-06	0.65826	3.06122e-06
0.66071	4.3045e-06	0.66071	3.06824e-06	0.66071	3.06671e-06
0.66315	4.29932e-06	0.66315	3.06244e-06	0.66315	3.07434e-06
0.66559	4.29138e-06	0.66559	3.05969e-06	0.66559	3.08014e-06
0.66803	4.28375e-06	0.66803	3.05695e-06	0.66803	3.08533e-06
0.67047	4.27307e-06	0.67047	3.05481e-06	0.67047	3.0896e-06
0.67291	4.26727e-06	0.67291	3.05359e-06	0.67291	3.09967e-06
0.67535	4.26056e-06	0.67535	3.04993e-06	0.67535	3.10608e-06
0.6778	4.25018e-06	0.6778	3.04901e-06	0.6778	3.11005e-06
0.68024	4.24164e-06	0.68024	3.04626e-06	0.68024	3.11737e-06
0.68268	4.22852e-06	0.68268	3.04596e-06	0.68268	3.12408e-06
0.68512	4.21936e-06	0.68512	3.04474e-06	0.68512	3.12927e-06
0.68756	4.20837e-06	0.68756	3.04291e-06	0.68756	3.13721e-06
0.69	4.19586e-06	0.69	3.04138e-06	0.69	3.1427e-06
0.69244	4.18243e-06	0.69244	3.04016e-06	0.69244	3.15125e-06
0.69489	4.17145e-06	0.69489	3.0423e-06	0.69489	3.16071e-06
0.69733	4.15924e-06	0.69733	3.03986e-06	0.69733	3.16803e-06
0.69977	4.14703e-06	0.69977	3.04108e-06	0.69977	3.17719e-06
0.70221	4.13391e-06	0.70221	3.03986e-06	0.70221	3.18451e-06
0.70465	4.12109e-06	0.70465	3.04108e-06	0.70465	3.19489e-06
0.70709	4.10645e-06	0.70709	3.0423e-06	0.70709	3.20251e-06
0.70953	4.09424e-06	0.70953	3.04199e-06	0.70953	3.20831e-06
0.71198	4.08142e-06	0.71198	3.04474e-06	0.71198	3.21716e-06
0.71442	4.06708e-06	0.71442	3.04443e-06	0.71442	3.22815e-06
0.71686	4.05396e-06	0.71686	3.04596e-06	0.71686	3.23456e-06
0.7193	4.04022e-06	0.7193	3.05054e-06	0.7193	3.24341e-06
0.72174	4.02771e-06	0.72174	3.04962e-06	0.72174	3.25256e-06
0.72418	4.01337e-06	0.72418	3.05176e-06	0.72418	3.26294e-06
0.72662	3.99933e-06	0.72662	3.05481e-06	0.72662	3.27148e-06
0.72906	3.9856e-06	0.72906	3.05786e-06	0.72906	3.28094e-06
0.73151	3.97339e-06	0.73151	3.06e-06	0.73151	3.28827e-06
0.73395	3.96088e-06	0.73395	3.06549e-06	0.73395	3.302e-06
0.73639	3.94531e-06	0.73639	3.06671e-06	0.73639	3.30933e-06
0.73883	3.93402e-06	0.73883	3.07129e-06	0.73883	3.32367e-06
0.74127	3.92151e-06	0.74127	3.07251e-06	0.74127	3.33435e-06
0.74371	3.90778e-06	0.74371	3.0777e-06	0.74371	3.34198e-06
0.74615	3.89587e-06	0.74615	3.08258e-06	0.74615	3.35358e-06
0.7486	3.88397e-06	0.7486	3.08655e-06	0.7486	3.36548e-06
0.75104	3.87207e-06	0.75104	3.09082e-06	0.75104	3.3786e-06
0.75348	3.86078e-06	0.75348	3.09753e-06	0.75348	3.39264e-06
0.75592	3.8501e-06	0.75592	3.1015e-06	0.75592	3.40118e-06
0.75836	3.83881e-06	0.75836	3.10913e-06	0.75836	3.41797e-06
0.7608	3.82813e-06	0.7608	3.11279e-06	0.7608	3.42926e-06
0.76324	3.81744e-06	0.76324	3.12225e-06	0.76324	3.4436e-06
0.76569	3.80707e-06	0.76569	3.12347e-06	0.76569	3.45215e-06
0.76813	3.79761e-06	0.76813	3.13049e-06	0.76813	3.46802e-06
0.77057	3.78723e-06	0.77057	3.13721e-06	0.77057	3.48022e-06
0.77301	3.7796e-06	0.77301	3.14575e-06	0.77301	3.49426e-06
0.77545	3.76892e-06	0.77545	3.15094e-06	0.77545	3.50708e-06
0.77789	3.76099e-06	0.77789	3.16101e-06	0.77789	3.52264e-06
0.78033	3.75244e-06	0.78033	3.16742e-06	0.78033	3.53577e-06
0.78278	3.74268e-06	0.78278	3.17322e-06	0.78278	3.54919e-06
0.78522	3.73566e-06	0.78522	3.18268e-06	0.78522	3.56323e-06
0.78766	3.72772e-06	0.78766	3.19092e-06	0.78766	3.57788e-06
0.7901	3.72009e-06	0.7901	3.19977e-06	0.7901	3.59131e-06
0.79254	3.71277e-06	0.79254	3.20801e-06	0.79254	3.60596e-06
0.79498	3.70453e-06	0.79498	3.21533e-06	0.79498	3.61908e-06
0.79742	3.69843e-06	0.79742	3.22693e-06	0.79742	3.63403e-06
0.79987	3.69141e-06	0.79987	3.23242e-06	0.79987	3.64777e-06
0.80231	3.68713e-06	0.80231	3.24402e-06	0.80231	3.6618e-06
0.80475	3.67859e-06	0.80475	3.25317e-06	0.80475	3.67615e-06
0.80719	3.67218e-06	0.80719	3.26263e-06	0.80719	3.68988e-06
0.80963	3.6673e-06	0.80963	3.27271e-06	0.80963	3.70514e-06
0.81207	3.66211e-06	0.81207	3.28522e-06	0.81207	3.72192e-06
0.81451	3.65753e-06	0.81451	3.2962e-06	0.81451	3.7381e-06
0.81696	3.65479e-06	0.81696	3.30658e-06	0.81696	3.75519e-06
0.8194	3.65021e-06	0.8194	3.31696e-06	0.8194	3.77075e-06
0.82184	3.64471e-06	0.82184	3.32794e-06	0.82184	3.78998e-06
0.82428	3.64166e-06	0.82428	3.34015e-06	0.82428	3.80859e-06
0.82672	3.63647e-06	0.82672	3.35144e-06	0.82672	3.82599e-06
0.82916	3.63434e-06	0.82916	3.36273e-06	0.82916	3.84705e-06
0.8316	3.63068e-06	0.8316	3.37616e-06	0.8316	3.86536e-06
0.83405	3.6261e-06	0.83405	3.38989e-06	0.83405	3.88641e-06
0.83649	3.62305e-06	0.83649	3.40179e-06	0.83649	3.90839e-06
0.83893	3.61969e-06	0.83893	3.41431e-06	0.83893	3.92639e-06
0.84137	3.61633e-06	0.84137	3.43018e-06	0.84137	3.94775e-06
0.84381	3.61237e-06	0.84381	3.44208e-06	0.84381	3.96606e-06
0.84625	3.60962e-06	0.84625	3.45612e-06	0.84625	3.98712e-06
0.84869	3.60809e-06	0.84869	3.47076e-06	0.84869	4.00696e-06
0.85114	3.60535e-06	0.85114	3.48785e-06	0.85114	4.03137e-06
0.85358	3.60168e-06	0.85358	3.5022e-06	0.85358	4.0506e-06
0.85602	3.60107e-06	0.85602	3.51685e-06	0.85602	4.07471e-06
0.85846	3.59802e-06	0.85846	3.53058e-06	0.85846	4.09698e-06
0.8609	3.59497e-06	0.8609	3.54736e-06	0.8609	4.12201e-06
0.86334	3.59192e-06	0.86334	3.56323e-06	0.86334	4.14581e-06
0.86578	3.59039e-06	0.86578	3.58032e-06	0.86578	4.16992e-06
0.86823	3.58856e-06	0.86823	3.5968e-06	0.86823	4.19586e-06
0.87067	3.58795e-06	0.87067	3.61481e-06	0.87067	4.22363e-06
0.87311	3.58459e-06	0.87311	3.6319e-06	0.87311	4.24622e-06
0.87555	3.58429e-06	0.87555	3.6499e-06	0.87555	4.27612e-06
0.87799	3.58276e-06	0.87799	3.66608e-06	0.87799	4.30267e-06
0.88043	3.58307e-06	0.88043	3.68683e-06	0.88043	4.33136e-06
0.88287	3.58002e-06	0.88287	3.70392e-06	0.88287	4.35974e-06
0.88531	3.58124e-06	0.88531	3.72467e-06	0.88531	4.39056e-06
0.88776	3.57941e-06	0.88776	3.74237e-06	0.88776	4.42322e-06
0.8902	3.58032e-06	0.8902	3.76343e-06	0.8902	4.45465e-06
0.89264	3.5791e-06	0.89264	3.78326e-06	0.89264	4.48517e-06
0.89508	3.58032e-06	0.89508	3.80432e-06	0.89508	4.51569e-06
0.89752	3.57788e-06	0.89752	3.82477e-06	0.89752	4.54895e-06
0.89996	3.57697e-06	0.89996	3.84491e-06	0.89996	4.58008e-06
0.9024	3.57819e-06	0.9024	3.86658e-06	0.9024	4.61151e-06
0.90485	3.57849e-06	0.90485	3.88702e-06	0.90485	4.64661e-06
0.90729	3.57849e-06	0.90729	3.91113e-06	0.90729	4.67957e-06
0.90973	3.57941e-06	0.90973	3.93402e-06	0.90973	4.71649e-06
0.91217	3.58002e-06	0.91217	3.95416e-06	0.91217	4.74823e-06
0.91461	3.58154e-06	0.91461	3.9801e-06	0.91461	4.7876e-06
0.91705	3.58246e-06	0.91705	4.00208e-06	0.91705	4.81873e-06
0.91949	3.58276e-06	0.91949	4.02802e-06	0.91949	4.8587e-06
0.92194	3.58215e-06	0.92194	4.05121e-06	0.92194	4.89136e-06
0.92438	3.58582e-06	0.92438	4.07501e-06	0.92438	4.9295e-06
0.92682	3.58582e-06	0.92682	4.10156e-06	0.92682	4.96735e-06
0.92926	3.58887e-06	0.92926	4.1272e-06	0.92926	5.00824e-06
0.9317	3.58887e-06	0.9317	4.15375e-06	0.9317	5.047e-06
0.93414	3.59161e-06	0.93414	4.18121e-06	0.93414	5.08759e-06
0.93658	3.59314e-06	0.93658	4.20441e-06	0.93658	5.12665e-06
0.93903	3.59741e-06	0.93903	4.2337e-06	0.93903	5.16846e-06
0.94147	3.5965e-06	0.94147	4.25873e-06	0.94147	5.2124e-06
0.94391	3.59955e-06	0.94391	4.28833e-06	0.94391	5.25574e-06
0.94635	3.60168e-06	0.94635	4.31427e-06	0.94635	5.30304e-06
0.94879	3.60626e-06	0.94879	4.34479e-06	0.94879	5.34912e-06
0.95123	3.60748e-06	0.95123	4.37134e-06	0.95123	5.39124e-06
0.95367	3.61145e-06	0.95367	4.40125e-06	0.95367	5.44159e-06
0.95612	3.61359e-06	0.95612	4.42932e-06	0.95612	5.49133e-06
0.95856	3.61603e-06	0.95856	4.46198e-06	0.95856	5.5423e-06
0.961	3.61938e-06	0.961	4.48914e-06	0.961	5.58868e-06
0.96344	3.62091e-06	0.96344	4.52026e-06	0.96344	5.63843e-06
0.96588	3.62793e-06	0.96588	4.54926e-06	0.96588	5.69e-06
0.96832	3.62946e-06	0.96832	4.58466e-06	0.96832	5.7428e-06
0.97076	3.63251e-06	0.97076	4.61456e-06	0.97076	5.79315e-06
0.97321	3.63922e-06	0.97321	4.6463e-06	0.97321	5.85236e-06
0.97565	3.64319e-06	0.97565	4.67621e-06	0.97565	5.90515e-06
0.97809	3.64624e-06	0.97809	4.71039e-06	0.97809	5.95795e-06
0.98053	3.65234e-06	0.98053	4.74152e-06	0.98053	6.01959e-06
0.98297	3.65723e-06	0.98297	4.77539e-06	0.98297	6.08521e-06
0.98541	3.66089e-06	0.98541	4.80896e-06	0.98541	6.14929e-06
0.98785	3.66791e-06	0.98785	4.84558e-06	0.98785	6.22253e-06
0.9903	3.67218e-06	0.9903	4.87457e-06	0.9903	6.28662e-06
0.99274	3.67859e-06	0.99274	4.91272e-06	0.99274	6.35986e-06
0.99518	3.685e-06	0.99518	4.94629e-06	0.99518	6.42395e-06
0.99762	3.6908e-06	0.99762	4.98383e-06	0.99762	6.49719e-06
1.00006	3.69537e-06	1.00006	5.01587e-06	1.00006	6.56433e-06
1.0025	3.703e-06	1.0025	5.05219e-06	1.0025	6.63757e-06
1.00494	3.7088e-06	1.00494	5.08759e-06	1.00494	6.71082e-06
1.00739	3.71643e-06	1.00739	5.12604e-06	1.00739	6.78711e-06
1.00983	3.72406e-06	1.00983	5.15961e-06	1.00983	6.8573e-06
1.01227	3.73169e-06	1.01227	5.19958e-06	1.01227	6.93665e-06
1.01471	3.73749e-06	1.01471	5.23499e-06	1.01471	7.00989e-06
1.01715	3.74359e-06	1.01715	5.27557e-06	1.01715	7.09229e-06
1.01959	3.75336e-06	1.01959	5.30975e-06	1.01959	7.17163e-06
1.02203	3.76068e-06	1.02203	5.34821e-06	1.02203	7.25403e-06
1.02448	3.76862e-06	1.02448	5.38788e-06	1.02448	7.33643e-06
1.02692	3.77625e-06	1.02692	5.42755e-06	1.02692	7.42798e-06
1.02936	3.7851e-06	1.02936	5.4657e-06	1.02936	7.51038e-06
1.0318	3.79333e-06	1.0318	5.5069e-06	1.0318	7.60193e-06
1.03424	3.79974e-06	1.03424	5.54535e-06	1.03424	7.68738e-06
1.03668	3.80951e-06	1.03668	5.58685e-06	1.03668	7.78198e-06
1.03912	3.81866e-06	1.03912	5.62469e-06	1.03912	7.87354e-06
1.04156	3.8269e-06	1.04156	5.66528e-06	1.04156	7.96509e-06
1.04401	3.83606e-06	1.04401	5.70709e-06	1.04401	8.06274e-06
1.04645	3.84705e-06	1.04645	5.74768e-06	1.04645	8.16345e-06
1.04889	3.85376e-06	1.04889	5.78949e-06	1.04889	8.25806e-06
1.05133	3.86505e-06	1.05133	5.82886e-06	1.05133	8.36487e-06
1.05377	3.87695e-06	1.05377	5.87067e-06	1.05377	8.46252e-06
1.05621	3.8855e-06	1.05621	5.91248e-06	1.05621	8.56628e-06
1.05865	3.89587e-06	1.05865	5.95398e-06	1.05865	8.6731e-06
1.0611	3.90594e-06	1.0611	5.99701e-06	1.0611	8.78296e-06
1.06354	3.91724e-06	1.06354	6.04004e-06	1.06354	8.88977e-06
1.06598	3.92731e-06	1.06598	6.08521e-06	1.06598	9.00574e-06
1.06842	3.94012e-06	1.06842	6.12793e-06	1.06842	9.11865e-06
1.07086	3.95081e-06	1.07086	6.17371e-06	1.07086	9.23462e-06
1.0733	3.96301e-06	1.0733	6.21643e-06	1.0733	9.34753e-06
1.07574	3.97522e-06	1.07574	6.26221e-06	1.07574	9.4696e-06
1.07819	3.9859e-06	1.07819	6.30493e-06	1.07819	9.58557e-06
1.08063	4.00116e-06	1.08063	6.35071e-06	1.08063	9.70459e-06
1.08307	4.01123e-06	1.08307	6.39648e-06	1.08307	9.82971e-06
1.08551	4.02252e-06	1.08551	6.44226e-06	1.08551	9.95483e-06
1.08795	4.03778e-06	1.08795	6.48804e-06	1.08795	1.008e-05
1.09039	4.0509e-06	1.09039	6.53381e-06	1.09039	1.02081e-05
1.09283	4.06494e-06	1.09283	6.57654e-06	1.09283	1.03333e-05
1.09528	4.07776e-06	1.09528	6.62231e-06	1.09528	1.04645e-05
1.09772	4.09027e-06	1.09772	6.66809e-06	1.09772	1.05957e-05
1.10016	4.10492e-06	1.10016	6.71692e-06	1.10016	1.07269e-05
1.1026	4.11896e-06	1.1026	6.7627e-06	1.1026	1.08612e-05
1.10504	4.1333e-06	1.10504	6.81152e-06	1.10504	1.10016e-05
1.10748	4.14856e-06	1.10748	6.8573e-06	1.10748	1.11359e-05
1.10992	4.16565e-06	1.10992	6.90613e-06	1.10992	1.12762e-05
1.11237	4.1803e-06	1.11237	6.9519e-06	1.11237	1.14105e-05
1.11481	4.19586e-06	1.11481	7.00378e-06	1.11481	1.1557e-05
1.11725	4.20868e-06	1.11725	7.04956e-06	1.11725	1.16943e-05
1.11969	4.22577e-06	1.11969	7.09534e-06	1.11969	1.18378e-05
1.12213	4.24194e-06	1.12213	7.14722e-06	1.12213	1.19843e-05
1.12457	4.25995e-06	1.12457	7.19604e-06	1.12457	1.21338e-05
1.12701	4.27704e-06	1.12701	7.24487e-06	1.12701	1.22803e-05
1.12946	4.29321e-06	1.12946	7.29675e-06	1.12946	1.24268e-05
1.1319	4.31152e-06	1.1319	7.34253e-06	1.1319	1.25732e-05
1.13434	4.32861e-06	1.13434	7.39441e-06	1.13434	1.27289e-05
1.13678	4.3454e-06	1.13678	7.44629e-06	1.13678	1.28754e-05
1.13922	4.3634e-06	1.13922	7.49512e-06	1.13922	1.3031e-05
1.14166	4.38263e-06	1.14166	7.55005e-06	1.14166	1.31805e-05
1.1441	4.40308e-06	1.1441	7.59888e-06	1.1441	1.33362e-05
1.14655	4.42108e-06	1.14655	7.65076e-06	1.14655	1.34888e-05
1.14899	4.44031e-06	1.14899	7.70569e-06	1.14899	1.36444e-05
1.15143	4.45953e-06	1.15143	7.75452e-06	1.15143	1.38e-05
1.15387	4.47937e-06	1.15387	7.80945e-06	1.15387	1.39618e-05
1.15631	4.50165e-06	1.15631	7.86133e-06	1.15631	1.41144e-05
1.15875	4.5224e-06	1.15875	7.91321e-06	1.15875	1.42761e-05
1.16119	4.54193e-06	1.16119	7.96509e-06	1.16119	1.44318e-05
1.16364	4.56604e-06	1.16364	8.02307e-06	1.16364	1.45935e-05
1.16608	4.58435e-06	1.16608	8.07495e-06	1.16608	1.47491e-05
1.16852	4.6109e-06	1.16852	8.13293e-06	1.16852	1.4917e-05
1.17096	4.63104e-06	1.17096	8.18787e-06	1.17096	1.50726e-05
1.1734	4.65454e-06	1.1734	8.2428e-06	1.1734	1.52374e-05
1.17584	4.67651e-06	1.17584	8.29773e-06	1.17584	1.53992e-05
1.17828	4.70062e-06	1.17828	8.35266e-06	1.17828	1.5564e-05
1.18073	4.72565e-06	1.18073	8.40759e-06	1.18073	1.57318e-05
1.18317	4.74915e-06	1.18317	8.46863e-06	1.18317	1.59027e-05
1.18561	4.77417e-06	1.18561	8.52356e-06	1.18561	1.60645e-05
1.18805	4.79858e-06	1.18805	8.58459e-06	1.18805	1.62384e-05
1.19049	4.82391e-06	1.19049	8.63953e-06	1.19049	1.64001e-05
1.19293	4.84863e-06	1.19293	8.70056e-06	1.19293	1.6571e-05
1.19537	4.87457e-06	1.19537	8.75549e-06	1.19537	1.67358e-05
1.19781	4.90112e-06	1.19781	8.81653e-06	1.19781	1.69067e-05
1.20026	4.92767e-06	1.20026	8.87756e-06	1.20026	1.70776e-05
1.2027	4.95514e-06	1.2027	8.9386e-06	1.2027	1.72516e-05
1.20514	4.98383e-06	1.20514	8.99658e-06	1.20514	1.74194e-05
1.20758	5.01007e-06	1.20758	9.06372e-06	1.20758	1.75995e-05
1.21002	5.03967e-06	1.21002	9.1217e-06	1.21002	1.77673e-05
1.21246	5.06531e-06	1.21246	9.18274e-06	1.21246	1.79413e-05
1.2149	5.09583e-06	1.2149	9.24683e-06	1.2149	1.81152e-05
1.21735	5.12451e-06	1.21735	9.31091e-06	1.21735	1.82892e-05
1.21979	5.15228e-06	1.21979	9.37195e-06	1.21979	1.84692e-05
1.22223	5.18433e-06	1.22223	9.43909e-06	1.22223	1.86523e-05
1.22467	5.21423e-06	1.22467	9.50012e-06	1.22467	1.88263e-05
1.22711	5.24628e-06	1.22711	9.57031e-06	1.22711	1.90094e-05
1.22955	5.27649e-06	1.22955	9.6344e-06	1.22955	1.91895e-05
1.23199	5.30853e-06	1.23199	9.70459e-06	1.23199	1.93726e-05
1.23444	5.33966e-06	1.23444	9.76868e-06	1.23444	1.95526e-05
1.23688	5.36774e-06	1.23688	9.83582e-06	1.23688	1.97357e-05
1.23932	5.4007e-06	1.23932	9.90601e-06	1.23932	1.99158e-05
1.24176	5.43427e-06	1.24176	9.9762e-06	1.24176	2.0108e-05
1.2442	5.4657e-06	1.2442	1.00433e-05	1.2442	2.02911e-05
1.24664	5.5011e-06	1.24664	1.01135e-05	1.24664	2.04803e-05
1.24908	5.53314e-06	1.24908	1.01837e-05	1.24908	2.06635e-05
1.25153	5.56824e-06	1.25153	1.02539e-05	1.25153	2.08496e-05
1.25397	5.60242e-06	1.25397	1.03241e-05	1.25397	2.10358e-05
1.25641	5.63599e-06	1.25641	1.03973e-05	1.25641	2.1225e-05
1.25885	5.672e-06	1.25885	1.04706e-05	1.25885	2.14172e-05
1.26129	5.70709e-06	1.26129	1.05438e-05	1.26129	2.16156e-05
1.26373	5.74127e-06	1.26373	1.06171e-05	1.26373	2.18018e-05
1.26617	5.78033e-06	1.26617	1.06964e-05	1.26617	2.20032e-05
1.26862	5.81665e-06	1.26862	1.07666e-05	1.26862	2.21924e-05
1.27106	5.8548e-06	1.27106	1.08459e-05	1.27106	2.23907e-05
1.2735	5.89111e-06	1.2735	1.09192e-05	1.2735	2.2583e-05
1.27594	5.92926e-06	1.27594	1.09985e-05	1.27594	2.27814e-05
1.27838	5.96893e-06	1.27838	1.10748e-05	1.27838	2.29797e-05
1.28082	6.01013e-06	1.28082	1.11572e-05	1.28082	2.31873e-05
1.28326	6.04858e-06	1.28326	1.12305e-05	1.28326	2.33765e-05
1.28571	6.08826e-06	1.28571	1.13129e-05	1.28571	2.35901e-05
1.28815	6.12793e-06	1.28815	1.13922e-05	1.28815	2.37854e-05
1.29059	6.17065e-06	1.29059	1.14746e-05	1.29059	2.39899e-05
1.29303	6.21033e-06	1.29303	1.1554e-05	1.29303	2.41882e-05
1.29547	6.25305e-06	1.29547	1.16394e-05	1.29547	2.43988e-05
1.29791	6.29272e-06	1.29791	1.17218e-05	1.29791	2.46124e-05
1.30035	6.33545e-06	1.30035	1.18073e-05	1.30035	2.4826e-05
1.3028	6.38123e-06	1.3028	1.18896e-05	1.3028	2.50336e-05
1.30524	6.42395e-06	1.30524	1.19812e-05	1.30524	2.52533e-05
1.30768	6.46667e-06	1.30768	1.20605e-05	1.30768	2.54608e-05
1.31012	6.51245e-06	1.31012	1.21521e-05	1.31012	2.56836e-05
1.31256	6.56128e-06	1.31256	1.22375e-05	1.31256	2.58911e-05
1.315	6.60095e-06	1.315	1.2326e-05	1.315	2.61047e-05
1.31744	6.64978e-06	1.31744	1.24146e-05	1.31744	2.63214e-05
1.31989	6.69861e-06	1.31989	1.25061e-05	1.31989	2.65411e-05
1.32233	6.74438e-06	1.32233	1.25977e-05	1.32233	2.67517e-05
1.32477	6.79626e-06	1.32477	1.26892e-05	1.32477	2.69775e-05
1.32721	6.84204e-06	1.32721	1.27808e-05	1.32721	2.71912e-05
1.32965	6.89087e-06	1.32965	1.28784e-05	1.32965	2.742e-05
1.33209	6.9397e-06	1.33209	1.297e-05	1.33209	2.76398e-05
1.33453	6.98853e-06	1.33453	1.30676e-05	1.33453	2.78595e-05
1.33698	7.04041e-06	1.33698	1.31592e-05	1.33698	2.80853e-05
1.33942	7.09229e-06	1.33942	1.32599e-05	1.33942	2.83173e-05
1.34186	7.14111e-06	1.34186	1.33545e-05	1.34186	2.85339e-05
1.3443	7.19604e-06	1.3443	1.34521e-05	1.3443	2.87689e-05
1.34674	7.24792e-06	1.34674	1.35498e-05	1.34674	2.89886e-05
1.34918	7.30286e-06	1.34918	1.36536e-05	1.34918	2.92236e-05
1.35162	7.35168e-06	1.35162	1.37512e-05	1.35162	2.94525e-05
1.35406	7.40662e-06	1.35406	1.38519e-05	1.35406	2.96783e-05
1.35651	7.46155e-06	1.35651	1.39557e-05	1.35651	2.99133e-05
1.35895	7.51648e-06	1.35895	1.40625e-05	1.35895	3.01514e-05
1.36139	7.57141e-06	1.36139	1.41632e-05	1.36139	3.03741e-05
1.36383	7.62939e-06	1.36383	1.42731e-05	1.36383	3.06152e-05
1.36627	7.68738e-06	1.36627	1.43738e-05	1.36627	3.08411e-05
1.36871	7.74536e-06	1.36871	1.44806e-05	1.36871	3.1076e-05
1.37115	7.80334e-06	1.37115	1.45874e-05	1.37115	3.13019e-05
1.3736	7.86438e-06	1.3736	1.46973e-05	1.3736	3.15369e-05
1.37604	7.91931e-06	1.37604	1.48041e-05	1.37604	3.17719e-05
1.37848	7.98035e-06	1.37848	1.492e-05	1.37848	3.2016e-05
1.38092	8.04138e-06	1.38092	1.50238e-05	1.38092	3.22449e-05
1.38336	8.10547e-06	1.38336	1.51428e-05	1.38336	3.2489e-05
1.3858	8.16345e-06	1.3858	1.52527e-05	1.3858	3.27148e-05
1.38824	8.23059e-06	1.38824	1.53687e-05	1.38824	3.2962e-05
1.39069	8.28857e-06	1.39069	1.54816e-05	1.39069	3.3194e-05
1.39313	8.35266e-06	1.39313	1.55975e-05	1.39313	3.34351e-05
1.39557	8.4198e-06	1.39557	1.57135e-05	1.39557	3.36731e-05
1.39801	8.48389e-06	1.39801	1.58356e-05	1.39801	3.39203e-05
1.40045	8.54797e-06	1.40045	1.59546e-05	1.40045	3.41522e-05
1.40289	8.61511e-06	1.40289	1.60736e-05	1.40289	3.44055e-05
1.40533	8.6792e-06	1.40533	1.61896e-05	1.40533	3.46405e-05
1.40778	8.74939e-06	1.40778	1.63116e-05	1.40778	3.48877e-05
1.41022	8.81348e-06	1.41022	1.64307e-05	1.41022	3.51288e-05
1.41266	8.88367e-06	1.41266	1.65588e-05	1.41266	3.53699e-05
1.4151	8.95386e-06	1.4151	1.66779e-05	1.4151	3.56171e-05
1.41754	9.0271e-06	1.41754	1.68091e-05	1.41754	3.58673e-05
1.41998	9.09729e-06	1.41998	1.69312e-05	1.41998	3.61053e-05
1.42242	9.17053e-06	1.42242	1.70624e-05	1.42242	3.63586e-05
1.42487	9.24072e-06	1.42487	1.71844e-05	1.42487	3.65936e-05
1.42731	9.31396e-06	1.42731	1.73187e-05	1.42731	3.6853e-05
1.42975	9.38416e-06	1.42975	1.74469e-05	1.42975	3.70911e-05
1.43219	9.46045e-06	1.43219	1.75751e-05	1.43219	3.73383e-05
1.43463	9.53674e-06	1.43463	1.77063e-05	1.43463	3.75885e-05
1.43707	9.61609e-06	1.43707	1.78436e-05	1.43707	3.78448e-05
1.43951	9.68933e-06	1.43951	1.79718e-05	1.43951	3.80798e-05
1.44196	9.76563e-06	1.44196	1.81091e-05	1.44196	3.83392e-05
1.4444	9.84192e-06	1.4444	1.82404e-05	1.4444	3.85803e-05
1.44684	9.92432e-06	1.44684	1.83807e-05	1.44684	3.88336e-05
1.44928	1.00006e-05	1.44928	1.8515e-05	1.44928	3.90808e-05
1.45172	1.008e-05	1.45172	1.86554e-05	1.45172	3.9325e-05
1.45416	1.01624e-05	1.45416	1.87897e-05	1.45416	3.95752e-05
1.4566	1.02417e-05	1.4566	1.89362e-05	1.4566	3.98315e-05
1.45905	1.03241e-05	1.45905	1.90735e-05	1.45905	4.00726e-05
1.46149	1.04065e-05	1.46149	1.922e-05	1.46149	4.0329e-05
1.46393	1.04889e-05	1.46393	1.93604e-05	1.46393	4.05762e-05
1.46637	1.05743e-05	1.46637	1.95068e-05	1.46637	4.08325e-05
1.46881	1.06567e-05	1.46881	1.96472e-05	1.46881	4.10767e-05
1.47125	1.07391e-05	1.47125	1.97937e-05	1.47125	4.133e-05
1.47369	1.08215e-05	1.47369	1.99371e-05	1.47369	4.15833e-05
1.47614	1.091e-05	1.47614	2.00897e-05	1.47614	4.18457e-05
1.47858	1.09955e-05	1.47858	2.02332e-05	1.47858	4.20868e-05
1.48102	1.10901e-05	1.48102	2.03888e-05	1.48102	4.23523e-05
1.48346	1.11694e-05	1.48346	2.05322e-05	1.48346	4.26056e-05
1.4859	1.12579e-05	1.4859	2.06848e-05	1.4859	4.28619e-05
1.48834	1.13434e-05	1.48834	2.08344e-05	1.48834	4.31061e-05
1.49078	1.14319e-05	1.49078	2.09869e-05	1.49078	4.33655e-05
1.49323	1.15204e-05	1.49323	2.11426e-05	1.49323	4.36249e-05
1.49567	1.16119e-05	1.49567	2.12982e-05	1.49567	4.38873e-05
1.49811	1.16974e-05	1.49811	2.14478e-05	1.49811	4.41345e-05
1.50055	1.17889e-05	1.50055	2.16095e-05	1.50055	4.44061e-05

## Sheet: Figure S8(b)
-1.4975	-4.97345e-05	-1.4975	-9.50073e-05	-1.4975	-9.99969e-05
-1.49506	-3.98163e-05	-1.49506	-8.12073e-05	-1.49506	-9.57031e-05
-1.49261	-3.4848e-05	-1.49261	-7.25403e-05	-1.49261	-8.73413e-05
-1.49017	-3.17352e-05	-1.49017	-6.64063e-05	-1.49017	-8.13293e-05
-1.48773	-2.95227e-05	-1.48773	-6.17065e-05	-1.48773	-7.65991e-05
-1.48529	-2.78381e-05	-1.48529	-5.79224e-05	-1.48529	-7.27234e-05
-1.48285	-2.64771e-05	-1.48285	-5.48096e-05	-1.48285	-6.94885e-05
-1.48041	-2.53265e-05	-1.48041	-5.21545e-05	-1.48041	-6.67114e-05
-1.47797	-2.43286e-05	-1.47797	-4.98047e-05	-1.47797	-6.42395e-05
-1.47552	-2.3465e-05	-1.47552	-4.78241e-05	-1.47552	-6.20728e-05
-1.47308	-2.26746e-05	-1.47308	-4.599e-05	-1.47308	-6.00891e-05
-1.47064	-2.19757e-05	-1.47064	-4.4342e-05	-1.47064	-5.82886e-05
-1.4682	-2.13318e-05	-1.4682	-4.28314e-05	-1.4682	-5.66406e-05
-1.46576	-2.0752e-05	-1.46576	-4.1275e-05	-1.46576	-5.51453e-05
-1.46332	-2.02148e-05	-1.46332	-3.99963e-05	-1.46332	-5.37415e-05
-1.46088	-1.9696e-05	-1.46088	-3.88245e-05	-1.46088	-5.24292e-05
-1.45844	-1.92261e-05	-1.45844	-3.77289e-05	-1.45844	-5.12085e-05
-1.45599	-1.87805e-05	-1.45599	-3.67035e-05	-1.45599	-5.00488e-05
-1.45355	-1.83563e-05	-1.45355	-3.5733e-05	-1.45355	-4.90082e-05
-1.45111	-1.79657e-05	-1.45111	-3.48358e-05	-1.45111	-4.79828e-05
-1.44867	-1.75873e-05	-1.44867	-3.39722e-05	-1.44867	-4.6991e-05
-1.44623	-1.72302e-05	-1.44623	-3.31726e-05	-1.44623	-4.60602e-05
-1.44379	-1.68884e-05	-1.44379	-3.23975e-05	-1.44379	-4.51721e-05
-1.44135	-1.65649e-05	-1.44135	-3.16711e-05	-1.44135	-4.41284e-05
-1.4389	-1.62598e-05	-1.4389	-3.09692e-05	-1.4389	-4.33136e-05
-1.43646	-1.59607e-05	-1.43646	-3.0304e-05	-1.43646	-4.25293e-05
-1.43402	-1.56708e-05	-1.43402	-2.966e-05	-1.43402	-4.17664e-05
-1.43158	-1.53961e-05	-1.43158	-2.90558e-05	-1.43158	-4.10492e-05
-1.42914	-1.51245e-05	-1.42914	-2.84637e-05	-1.42914	-4.03351e-05
-1.4267	-1.48712e-05	-1.4267	-2.79053e-05	-1.4267	-3.96637e-05
-1.42426	-1.4624e-05	-1.42426	-2.73529e-05	-1.42426	-3.90015e-05
-1.42181	-1.4386e-05	-1.42181	-2.68372e-05	-1.42181	-3.8385e-05
-1.41937	-1.41541e-05	-1.41937	-2.63306e-05	-1.41937	-3.77777e-05
-1.41693	-1.39343e-05	-1.41693	-2.58453e-05	-1.41693	-3.71857e-05
-1.41449	-1.37115e-05	-1.41449	-2.53662e-05	-1.41449	-3.66089e-05
-1.41205	-1.35071e-05	-1.41205	-2.49176e-05	-1.41205	-3.60535e-05
-1.40961	-1.33026e-05	-1.40961	-2.4472e-05	-1.40961	-3.5498e-05
-1.40717	-1.31042e-05	-1.40717	-2.40479e-05	-1.40717	-3.49731e-05
-1.40472	-1.29181e-05	-1.40472	-2.36359e-05	-1.40472	-3.44513e-05
-1.40228	-1.27258e-05	-1.40228	-2.3233e-05	-1.40228	-3.39447e-05
-1.39984	-1.25427e-05	-1.39984	-2.28394e-05	-1.39984	-3.34564e-05
-1.3974	-1.23627e-05	-1.3974	-2.2464e-05	-1.3974	-3.29803e-05
-1.39496	-1.21918e-05	-1.39496	-2.20886e-05	-1.39496	-3.25073e-05
-1.39252	-1.2027e-05	-1.39252	-2.17346e-05	-1.39252	-3.20618e-05
-1.39008	-1.18622e-05	-1.39008	-2.13806e-05	-1.39008	-3.16071e-05
-1.38763	-1.17096e-05	-1.38763	-2.10449e-05	-1.38763	-3.11798e-05
-1.38519	-1.15479e-05	-1.38519	-2.07123e-05	-1.38519	-3.07526e-05
-1.38275	-1.13983e-05	-1.38275	-2.03918e-05	-1.38275	-3.03436e-05
-1.38031	-1.12518e-05	-1.38031	-2.00745e-05	-1.38031	-2.99316e-05
-1.37787	-1.11053e-05	-1.37787	-1.97723e-05	-1.37787	-2.9541e-05
-1.37543	-1.0965e-05	-1.37543	-1.94672e-05	-1.37543	-2.91443e-05
-1.37299	-1.08276e-05	-1.37299	-1.91803e-05	-1.37299	-2.8775e-05
-1.37054	-1.06903e-05	-1.37054	-1.88904e-05	-1.37054	-2.83936e-05
-1.3681	-1.05621e-05	-1.3681	-1.86157e-05	-1.3681	-2.80304e-05
-1.36566	-1.04309e-05	-1.36566	-1.8338e-05	-1.36566	-2.76672e-05
-1.36322	-1.03027e-05	-1.36322	-1.80725e-05	-1.36322	-2.73163e-05
-1.36078	-1.01807e-05	-1.36078	-1.78131e-05	-1.36078	-2.69714e-05
-1.35834	-1.00586e-05	-1.35834	-1.75568e-05	-1.35834	-2.66296e-05
-1.3559	-9.93958e-06	-1.3559	-1.73035e-05	-1.3559	-2.62878e-05
-1.35345	-9.82666e-06	-1.35345	-1.70624e-05	-1.35345	-2.59674e-05
-1.35101	-9.71069e-06	-1.35101	-1.68213e-05	-1.35101	-2.56409e-05
-1.34857	-9.60083e-06	-1.34857	-1.65924e-05	-1.34857	-2.53296e-05
-1.34613	-9.49097e-06	-1.34613	-1.63574e-05	-1.34613	-2.50122e-05
-1.34369	-9.38416e-06	-1.34369	-1.61346e-05	-1.34369	-2.4707e-05
-1.34125	-9.2804e-06	-1.34125	-1.59149e-05	-1.34125	-2.4408e-05
-1.33881	-9.17664e-06	-1.33881	-1.56952e-05	-1.33881	-2.4118e-05
-1.33636	-9.07288e-06	-1.33636	-1.54816e-05	-1.33636	-2.38281e-05
-1.33392	-8.97827e-06	-1.33392	-1.52771e-05	-1.33392	-2.35443e-05
-1.33148	-8.87756e-06	-1.33148	-1.50665e-05	-1.33148	-2.32666e-05
-1.32904	-8.78296e-06	-1.32904	-1.48743e-05	-1.32904	-2.29889e-05
-1.3266	-8.6853e-06	-1.3266	-1.46759e-05	-1.3266	-2.27203e-05
-1.32416	-8.59375e-06	-1.32416	-1.44836e-05	-1.32416	-2.24609e-05
-1.32172	-8.5022e-06	-1.32172	-1.42944e-05	-1.32172	-2.21954e-05
-1.31927	-8.4137e-06	-1.31927	-1.41083e-05	-1.31927	-2.1933e-05
-1.31683	-8.3252e-06	-1.31683	-1.39282e-05	-1.31683	-2.16797e-05
-1.31439	-8.2428e-06	-1.31439	-1.37512e-05	-1.31439	-2.14325e-05
-1.31195	-8.1543e-06	-1.31195	-1.35712e-05	-1.31195	-2.11853e-05
-1.30951	-8.07495e-06	-1.30951	-1.34033e-05	-1.30951	-2.09442e-05
-1.30707	-7.99255e-06	-1.30707	-1.32324e-05	-1.30707	-2.07031e-05
-1.30463	-7.91016e-06	-1.30463	-1.30676e-05	-1.30463	-2.04712e-05
-1.30219	-7.83081e-06	-1.30219	-1.29059e-05	-1.30219	-2.02332e-05
-1.29974	-7.75452e-06	-1.29974	-1.27411e-05	-1.29974	-2.00073e-05
-1.2973	-7.67822e-06	-1.2973	-1.25854e-05	-1.2973	-1.97723e-05
-1.29486	-7.60498e-06	-1.29486	-1.24329e-05	-1.29486	-1.95465e-05
-1.29242	-7.53174e-06	-1.29242	-1.22772e-05	-1.29242	-1.93268e-05
-1.28998	-7.46155e-06	-1.28998	-1.21277e-05	-1.28998	-1.91101e-05
-1.28754	-7.38525e-06	-1.28754	-1.19781e-05	-1.28754	-1.88843e-05
-1.2851	-7.31812e-06	-1.2851	-1.18378e-05	-1.2851	-1.86768e-05
-1.28265	-7.24792e-06	-1.28265	-1.16943e-05	-1.28265	-1.84631e-05
-1.28021	-7.17773e-06	-1.28021	-1.1554e-05	-1.28021	-1.82465e-05
-1.27777	-7.1106e-06	-1.27777	-1.14136e-05	-1.27777	-1.8042e-05
-1.27533	-7.04956e-06	-1.27533	-1.12823e-05	-1.27533	-1.78375e-05
-1.27289	-6.98242e-06	-1.27289	-1.1145e-05	-1.27289	-1.7627e-05
-1.27045	-6.92139e-06	-1.27045	-1.10168e-05	-1.27045	-1.74286e-05
-1.26801	-6.8573e-06	-1.26801	-1.08826e-05	-1.26801	-1.72211e-05
-1.26556	-6.79626e-06	-1.26556	-1.07574e-05	-1.26556	-1.70227e-05
-1.26312	-6.73523e-06	-1.26312	-1.06323e-05	-1.26312	-1.68304e-05
-1.26068	-6.67114e-06	-1.26068	-1.05103e-05	-1.26068	-1.66351e-05
-1.25824	-6.61011e-06	-1.25824	-1.03851e-05	-1.25824	-1.64398e-05
-1.2558	-6.55518e-06	-1.2558	-1.02661e-05	-1.2558	-1.62476e-05
-1.25336	-6.49719e-06	-1.25336	-1.01501e-05	-1.25336	-1.60583e-05
-1.25092	-6.43921e-06	-1.25092	-1.00342e-05	-1.25092	-1.58783e-05
-1.24847	-6.37817e-06	-1.24847	-9.92126e-06	-1.24847	-1.56891e-05
-1.24603	-6.32629e-06	-1.24603	-9.80835e-06	-1.24603	-1.5509e-05
-1.24359	-6.27136e-06	-1.24359	-9.69849e-06	-1.24359	-1.53259e-05
-1.24115	-6.21643e-06	-1.24115	-9.58862e-06	-1.24115	-1.51459e-05
-1.23871	-6.1615e-06	-1.23871	-9.47876e-06	-1.23871	-1.49689e-05
-1.23627	-6.11267e-06	-1.23627	-9.375e-06	-1.23627	-1.4798e-05
-1.23383	-6.06079e-06	-1.23383	-9.26514e-06	-1.23383	-1.46179e-05
-1.23138	-6.00891e-06	-1.23138	-9.16748e-06	-1.23138	-1.44501e-05
-1.22894	-5.95703e-06	-1.22894	-9.06372e-06	-1.22894	-1.42761e-05
-1.2265	-5.9082e-06	-1.2265	-8.96301e-06	-1.2265	-1.41113e-05
-1.22406	-5.85938e-06	-1.22406	-8.86536e-06	-1.22406	-1.39435e-05
-1.22162	-5.8075e-06	-1.22162	-8.7677e-06	-1.22162	-1.37787e-05
-1.21918	-5.76172e-06	-1.21918	-8.67004e-06	-1.21918	-1.36078e-05
-1.21674	-5.71289e-06	-1.21674	-8.57544e-06	-1.21674	-1.34491e-05
-1.21429	-5.66711e-06	-1.21429	-8.48389e-06	-1.21429	-1.32843e-05
-1.21185	-5.61829e-06	-1.21185	-8.39233e-06	-1.21185	-1.31287e-05
-1.20941	-5.57556e-06	-1.20941	-8.30078e-06	-1.20941	-1.297e-05
-1.20697	-5.52979e-06	-1.20697	-8.21228e-06	-1.20697	-1.28143e-05
-1.20453	-5.48706e-06	-1.20453	-8.12378e-06	-1.20453	-1.26556e-05
-1.20209	-5.44128e-06	-1.20209	-8.03833e-06	-1.20209	-1.25031e-05
-1.19965	-5.39551e-06	-1.19965	-7.94983e-06	-1.19965	-1.23444e-05
-1.1972	-5.35583e-06	-1.1972	-7.86743e-06	-1.1972	-1.21979e-05
-1.19476	-5.31311e-06	-1.19476	-7.78198e-06	-1.19476	-1.20392e-05
-1.19232	-5.27344e-06	-1.19232	-7.69958e-06	-1.19232	-1.18896e-05
-1.18988	-5.23071e-06	-1.18988	-7.61414e-06	-1.18988	-1.17371e-05
-1.18744	-5.19409e-06	-1.18744	-7.53479e-06	-1.18744	-1.15906e-05
-1.185	-5.15137e-06	-1.185	-7.4585e-06	-1.185	-1.14471e-05
-1.18256	-5.11169e-06	-1.18256	-7.37915e-06	-1.18256	-1.12976e-05
-1.18011	-5.07202e-06	-1.18011	-7.2998e-06	-1.18011	-1.11511e-05
-1.17767	-5.0354e-06	-1.17767	-7.22656e-06	-1.17767	-1.10107e-05
-1.17523	-4.99878e-06	-1.17523	-7.15027e-06	-1.17523	-1.08643e-05
-1.17279	-4.96216e-06	-1.17279	-7.07703e-06	-1.17279	-1.07208e-05
-1.17035	-4.92249e-06	-1.17035	-7.00073e-06	-1.17035	-1.05774e-05
-1.16791	-4.88892e-06	-1.16791	-6.92749e-06	-1.16791	-1.0437e-05
-1.16547	-4.85229e-06	-1.16547	-6.8573e-06	-1.16547	-1.02936e-05
-1.16302	-4.81567e-06	-1.16302	-6.78711e-06	-1.16302	-1.01532e-05
-1.16058	-4.7821e-06	-1.16058	-6.71387e-06	-1.16058	-1.00189e-05
-1.15814	-4.74976e-06	-1.15814	-6.64673e-06	-1.15814	-9.87854e-06
-1.1557	-4.71527e-06	-1.1557	-6.57654e-06	-1.1557	-9.74121e-06
-1.15326	-4.68353e-06	-1.15326	-6.5094e-06	-1.15326	-9.60388e-06
-1.15082	-4.64905e-06	-1.15082	-6.44226e-06	-1.15082	-9.4696e-06
-1.14838	-4.617e-06	-1.14838	-6.37512e-06	-1.14838	-9.33838e-06
-1.14594	-4.58344e-06	-1.14594	-6.31104e-06	-1.14594	-9.20715e-06
-1.14349	-4.552e-06	-1.14349	-6.24695e-06	-1.14349	-9.07593e-06
-1.14105	-4.51904e-06	-1.14105	-6.18286e-06	-1.14105	-8.94165e-06
-1.13861	-4.48975e-06	-1.13861	-6.11877e-06	-1.13861	-8.81348e-06
-1.13617	-4.45953e-06	-1.13617	-6.05774e-06	-1.13617	-8.68225e-06
-1.13373	-4.42749e-06	-1.13373	-5.9967e-06	-1.13373	-8.55713e-06
-1.13129	-4.39911e-06	-1.13129	-5.93262e-06	-1.13129	-8.42896e-06
-1.12885	-4.3692e-06	-1.12885	-5.87463e-06	-1.12885	-8.30688e-06
-1.1264	-4.33929e-06	-1.1264	-5.81665e-06	-1.1264	-8.18176e-06
-1.12396	-4.31122e-06	-1.12396	-5.76172e-06	-1.12396	-8.05969e-06
-1.12152	-4.28223e-06	-1.12152	-5.69763e-06	-1.12152	-7.93762e-06
-1.11908	-4.25507e-06	-1.11908	-5.6427e-06	-1.11908	-7.81555e-06
-1.11664	-4.22455e-06	-1.11664	-5.58472e-06	-1.11664	-7.69348e-06
-1.1142	-4.19891e-06	-1.1142	-5.52979e-06	-1.1142	-7.57751e-06
-1.11176	-4.17084e-06	-1.11176	-5.47485e-06	-1.11176	-7.4585e-06
-1.10931	-4.14398e-06	-1.10931	-5.41992e-06	-1.10931	-7.34863e-06
-1.10687	-4.11621e-06	-1.10687	-5.36804e-06	-1.10687	-7.22961e-06
-1.10443	-4.09119e-06	-1.10443	-5.31311e-06	-1.10443	-7.1167e-06
-1.10199	-4.06311e-06	-1.10199	-5.26123e-06	-1.10199	-7.00378e-06
-1.09955	-4.03717e-06	-1.09955	-5.2124e-06	-1.09955	-6.89392e-06
-1.09711	-4.01154e-06	-1.09711	-5.16052e-06	-1.09711	-6.78406e-06
-1.09467	-3.9856e-06	-1.09467	-5.10864e-06	-1.09467	-6.67725e-06
-1.09222	-3.96088e-06	-1.09222	-5.05981e-06	-1.09222	-6.57043e-06
-1.08978	-3.93433e-06	-1.08978	-5.01099e-06	-1.08978	-6.46362e-06
-1.08734	-3.91174e-06	-1.08734	-4.96216e-06	-1.08734	-6.35986e-06
-1.0849	-3.88794e-06	-1.0849	-4.91333e-06	-1.0849	-6.25916e-06
-1.08246	-3.86292e-06	-1.08246	-4.8645e-06	-1.08246	-6.1554e-06
-1.08002	-3.83789e-06	-1.08002	-4.81873e-06	-1.08002	-6.05774e-06
-1.07758	-3.81287e-06	-1.07758	-4.77295e-06	-1.07758	-5.95703e-06
-1.07513	-3.79211e-06	-1.07513	-4.72534e-06	-1.07513	-5.85938e-06
-1.07269	-3.76801e-06	-1.07269	-4.68109e-06	-1.07269	-5.76477e-06
-1.07025	-3.74573e-06	-1.07025	-4.63745e-06	-1.07025	-5.67017e-06
-1.06781	-3.72192e-06	-1.06781	-4.59442e-06	-1.06781	-5.57556e-06
-1.06537	-3.70148e-06	-1.06537	-4.54865e-06	-1.06537	-5.48401e-06
-1.06293	-3.67615e-06	-1.06293	-4.50531e-06	-1.06293	-5.39551e-06
-1.06049	-3.65448e-06	-1.06049	-4.46442e-06	-1.06049	-5.30701e-06
-1.05804	-3.63068e-06	-1.05804	-4.422e-06	-1.05804	-5.21851e-06
-1.0556	-3.61023e-06	-1.0556	-4.38049e-06	-1.0556	-5.13e-06
-1.05316	-3.58826e-06	-1.05316	-4.33899e-06	-1.05316	-5.04456e-06
-1.05072	-3.56689e-06	-1.05072	-4.2984e-06	-1.05072	-4.96216e-06
-1.04828	-3.54584e-06	-1.04828	-4.25934e-06	-1.04828	-4.87976e-06
-1.04584	-3.52448e-06	-1.04584	-4.2218e-06	-1.04584	-4.79736e-06
-1.0434	-3.50342e-06	-1.0434	-4.17877e-06	-1.0434	-4.71497e-06
-1.04095	-3.48358e-06	-1.04095	-4.14124e-06	-1.04095	-4.63562e-06
-1.03851	-3.46344e-06	-1.03851	-4.10339e-06	-1.03851	-4.55811e-06
-1.03607	-3.44513e-06	-1.03607	-4.06738e-06	-1.03607	-4.48578e-06
-1.03363	-3.42377e-06	-1.03363	-4.02771e-06	-1.03363	-4.40979e-06
-1.03119	-3.40271e-06	-1.03119	-3.99109e-06	-1.03119	-4.33655e-06
-1.02875	-3.38409e-06	-1.02875	-3.95508e-06	-1.02875	-4.26544e-06
-1.02631	-3.36517e-06	-1.02631	-3.91937e-06	-1.02631	-4.19403e-06
-1.02386	-3.34473e-06	-1.02386	-3.88367e-06	-1.02386	-4.12323e-06
-1.02142	-3.32611e-06	-1.02142	-3.84918e-06	-1.02142	-4.0567e-06
-1.01898	-3.30627e-06	-1.01898	-3.8147e-06	-1.01898	-3.98682e-06
-1.01654	-3.28827e-06	-1.01654	-3.78021e-06	-1.01654	-3.92609e-06
-1.0141	-3.26996e-06	-1.0141	-3.74664e-06	-1.0141	-3.86292e-06
-1.01166	-3.25073e-06	-1.01166	-3.71277e-06	-1.01166	-3.79913e-06
-1.00922	-3.23181e-06	-1.00922	-3.68134e-06	-1.00922	-3.74115e-06
-1.00677	-3.21411e-06	-1.00677	-3.64899e-06	-1.00677	-3.68134e-06
-1.00433	-3.1958e-06	-1.00433	-3.61664e-06	-1.00433	-3.62152e-06
-1.00189	-3.17871e-06	-1.00189	-3.58429e-06	-1.00189	-3.56964e-06
-0.99945	-3.15765e-06	-0.99945	-3.55194e-06	-0.99945	-3.51501e-06
-0.99701	-3.14148e-06	-0.99701	-3.52264e-06	-0.99701	-3.46039e-06
-0.99457	-3.12347e-06	-0.99457	-3.48907e-06	-0.99457	-3.40576e-06
-0.99213	-3.10608e-06	-0.99213	-3.46313e-06	-0.99213	-3.35632e-06
-0.98969	-3.08929e-06	-0.98969	-3.43323e-06	-0.98969	-3.30688e-06
-0.98724	-3.07281e-06	-0.98724	-3.40179e-06	-0.98724	-3.25836e-06
-0.9848	-3.05298e-06	-0.9848	-3.37128e-06	-0.9848	-3.21014e-06
-0.98236	-3.03619e-06	-0.98236	-3.34656e-06	-0.98236	-3.1665e-06
-0.97992	-3.01788e-06	-0.97992	-3.31543e-06	-0.97992	-3.12012e-06
-0.97748	-3.00079e-06	-0.97748	-3.28705e-06	-0.97748	-3.07465e-06
-0.97504	-2.98431e-06	-0.97504	-3.25928e-06	-0.97504	-3.03467e-06
-0.9726	-2.96783e-06	-0.9726	-3.23303e-06	-0.9726	-2.99255e-06
-0.97015	-2.94922e-06	-0.97015	-3.20709e-06	-0.97015	-2.95105e-06
-0.96771	-2.93243e-06	-0.96771	-3.1778e-06	-0.96771	-2.9071e-06
-0.96527	-2.91534e-06	-0.96527	-3.15155e-06	-0.96527	-2.86957e-06
-0.96283	-2.89886e-06	-0.96283	-3.12683e-06	-0.96283	-2.83051e-06
-0.96039	-2.88239e-06	-0.96039	-3.10059e-06	-0.96039	-2.79144e-06
-0.95795	-2.86774e-06	-0.95795	-3.07556e-06	-0.95795	-2.75452e-06
-0.95551	-2.8479e-06	-0.95551	-3.04932e-06	-0.95551	-2.71606e-06
-0.95306	-2.83447e-06	-0.95306	-3.02551e-06	-0.95306	-2.68127e-06
-0.95062	-2.81769e-06	-0.95062	-3.0014e-06	-0.95062	-2.64648e-06
-0.94818	-2.8009e-06	-0.94818	-2.97638e-06	-0.94818	-2.60773e-06
-0.94574	-2.78534e-06	-0.94574	-2.95319e-06	-0.94574	-2.57385e-06
-0.9433	-2.771e-06	-0.9433	-2.92938e-06	-0.9433	-2.54333e-06
-0.94086	-2.75299e-06	-0.94086	-2.90466e-06	-0.94086	-2.50671e-06
-0.93842	-2.74017e-06	-0.93842	-2.88208e-06	-0.93842	-2.47589e-06
-0.93597	-2.7243e-06	-0.93597	-2.86011e-06	-0.93597	-2.44141e-06
-0.93353	-2.70935e-06	-0.93353	-2.83905e-06	-0.93353	-2.41394e-06
-0.93109	-2.6944e-06	-0.93109	-2.81616e-06	-0.93109	-2.37885e-06
-0.92865	-2.67944e-06	-0.92865	-2.79327e-06	-0.92865	-2.34863e-06
-0.92621	-2.66418e-06	-0.92621	-2.77283e-06	-0.92621	-2.32025e-06
-0.92377	-2.64954e-06	-0.92377	-2.75177e-06	-0.92377	-2.29248e-06
-0.92133	-2.63489e-06	-0.92133	-2.72888e-06	-0.92133	-2.26379e-06
-0.91888	-2.61963e-06	-0.91888	-2.70966e-06	-0.91888	-2.23602e-06
-0.91644	-2.60681e-06	-0.91644	-2.68646e-06	-0.91644	-2.20825e-06
-0.914	-2.59155e-06	-0.914	-2.66907e-06	-0.914	-2.18658e-06
-0.91156	-2.57813e-06	-0.91156	-2.64587e-06	-0.91156	-2.15851e-06
-0.90912	-2.56439e-06	-0.90912	-2.62848e-06	-0.90912	-2.13257e-06
-0.90668	-2.54913e-06	-0.90668	-2.60803e-06	-0.90668	-2.10724e-06
-0.90424	-2.53632e-06	-0.90424	-2.59094e-06	-0.90424	-2.08557e-06
-0.90179	-2.52228e-06	-0.90179	-2.56958e-06	-0.90179	-2.05841e-06
-0.89935	-2.50916e-06	-0.89935	-2.55188e-06	-0.89935	-2.03491e-06
-0.89691	-2.4942e-06	-0.89691	-2.53082e-06	-0.89691	-2.01019e-06
-0.89447	-2.48016e-06	-0.89447	-2.51434e-06	-0.89447	-1.98883e-06
-0.89203	-2.46704e-06	-0.89203	-2.49573e-06	-0.89203	-1.96655e-06
-0.88959	-2.45331e-06	-0.88959	-2.47711e-06	-0.88959	-1.94275e-06
-0.88715	-2.43896e-06	-0.88715	-2.4588e-06	-0.88715	-1.92139e-06
-0.8847	-2.42554e-06	-0.8847	-2.44354e-06	-0.8847	-1.90521e-06
-0.88226	-2.40997e-06	-0.88226	-2.4234e-06	-0.88226	-1.87836e-06
-0.87982	-2.40021e-06	-0.87982	-2.40906e-06	-0.87982	-1.86249e-06
-0.87738	-2.38495e-06	-0.87738	-2.38922e-06	-0.87738	-1.84204e-06
-0.87494	-2.37213e-06	-0.87494	-2.3761e-06	-0.87494	-1.8222e-06
-0.8725	-2.35779e-06	-0.8725	-2.35748e-06	-0.8725	-1.80298e-06
-0.87006	-2.34558e-06	-0.87006	-2.34222e-06	-0.87006	-1.78223e-06
-0.86761	-2.33124e-06	-0.86761	-2.32666e-06	-0.86761	-1.76575e-06
-0.86517	-2.31903e-06	-0.86517	-2.31049e-06	-0.86517	-1.74713e-06
-0.86273	-2.30591e-06	-0.86273	-2.29553e-06	-0.86273	-1.72821e-06
-0.86029	-2.29309e-06	-0.86029	-2.27936e-06	-0.86029	-1.71173e-06
-0.85785	-2.27936e-06	-0.85785	-2.2641e-06	-0.85785	-1.69342e-06
-0.85541	-2.26471e-06	-0.85541	-2.24884e-06	-0.85541	-1.67969e-06
-0.85297	-2.25464e-06	-0.85297	-2.23328e-06	-0.85297	-1.65985e-06
-0.85052	-2.24121e-06	-0.85052	-2.2168e-06	-0.85052	-1.64368e-06
-0.84808	-2.22931e-06	-0.84808	-2.20215e-06	-0.84808	-1.62628e-06
-0.84564	-2.21588e-06	-0.84564	-2.19025e-06	-0.84564	-1.6095e-06
-0.8432	-2.20215e-06	-0.8432	-2.17285e-06	-0.8432	-1.59637e-06
-0.84076	-2.18964e-06	-0.84076	-2.15881e-06	-0.84076	-1.58142e-06
-0.83832	-2.1756e-06	-0.83832	-2.14508e-06	-0.83832	-1.56677e-06
-0.83588	-2.16461e-06	-0.83588	-2.13287e-06	-0.83588	-1.55243e-06
-0.83344	-2.15271e-06	-0.83344	-2.11761e-06	-0.83344	-1.53748e-06
-0.83099	-2.1405e-06	-0.83099	-2.10175e-06	-0.83099	-1.52466e-06
-0.82855	-2.12677e-06	-0.82855	-2.08771e-06	-0.82855	-1.50848e-06
-0.82611	-2.11639e-06	-0.82611	-2.07703e-06	-0.82611	-1.4975e-06
-0.82367	-2.10327e-06	-0.82367	-2.06146e-06	-0.82367	-1.48315e-06
-0.82123	-2.09106e-06	-0.82123	-2.04987e-06	-0.82123	-1.47064e-06
-0.81879	-2.07855e-06	-0.81879	-2.03522e-06	-0.81879	-1.45813e-06
-0.81635	-2.06665e-06	-0.81635	-2.02362e-06	-0.81635	-1.44653e-06
-0.8139	-2.052e-06	-0.8139	-2.00989e-06	-0.8139	-1.43219e-06
-0.81146	-2.04254e-06	-0.81146	-1.99432e-06	-0.81146	-1.41968e-06
-0.80902	-2.02881e-06	-0.80902	-1.98364e-06	-0.80902	-1.40686e-06
-0.80658	-2.0166e-06	-0.80658	-1.97113e-06	-0.80658	-1.39374e-06
-0.80414	-2.00531e-06	-0.80414	-1.95679e-06	-0.80414	-1.38336e-06
-0.8017	-1.9931e-06	-0.8017	-1.94611e-06	-0.8017	-1.37238e-06
-0.79926	-1.97876e-06	-0.79926	-1.93359e-06	-0.79926	-1.36078e-06
-0.79681	-1.9696e-06	-0.79681	-1.91986e-06	-0.79681	-1.3501e-06
-0.79437	-1.9574e-06	-0.79437	-1.90643e-06	-0.79437	-1.33942e-06
-0.79193	-1.94519e-06	-0.79193	-1.89362e-06	-0.79193	-1.32843e-06
-0.78949	-1.93268e-06	-0.78949	-1.8808e-06	-0.78949	-1.31744e-06
-0.78705	-1.92261e-06	-0.78705	-1.87103e-06	-0.78705	-1.30829e-06
-0.78461	-1.90887e-06	-0.78461	-1.85638e-06	-0.78461	-1.29791e-06
-0.78217	-1.89667e-06	-0.78217	-1.84448e-06	-0.78217	-1.28784e-06
-0.77972	-1.88446e-06	-0.77972	-1.83228e-06	-0.77972	-1.27808e-06
-0.77728	-1.87286e-06	-0.77728	-1.81976e-06	-0.77728	-1.27045e-06
-0.77484	-1.86066e-06	-0.77484	-1.80847e-06	-0.77484	-1.25824e-06
-0.7724	-1.84906e-06	-0.7724	-1.79474e-06	-0.7724	-1.25427e-06
-0.76996	-1.83624e-06	-0.76996	-1.78467e-06	-0.76996	-1.24023e-06
-0.76752	-1.82343e-06	-0.76752	-1.77307e-06	-0.76752	-1.23352e-06
-0.76508	-1.81152e-06	-0.76508	-1.75842e-06	-0.76508	-1.22131e-06
-0.76263	-1.80237e-06	-0.76263	-1.74835e-06	-0.76263	-1.21552e-06
-0.76019	-1.78833e-06	-0.76019	-1.73645e-06	-0.76019	-1.20575e-06
-0.75775	-1.77704e-06	-0.75775	-1.72516e-06	-0.75775	-1.1969e-06
-0.75531	-1.76483e-06	-0.75531	-1.71326e-06	-0.75531	-1.19049e-06
-0.75287	-1.75415e-06	-0.75287	-1.70135e-06	-0.75287	-1.18011e-06
-0.75043	-1.74164e-06	-0.75043	-1.68823e-06	-0.75043	-1.1734e-06
-0.74799	-1.72882e-06	-0.74799	-1.67725e-06	-0.74799	-1.16364e-06
-0.74554	-1.71936e-06	-0.74554	-1.66565e-06	-0.74554	-1.15631e-06
-0.7431	-1.70593e-06	-0.7431	-1.65497e-06	-0.7431	-1.14807e-06
-0.74066	-1.69464e-06	-0.74066	-1.64246e-06	-0.74066	-1.14014e-06
-0.73822	-1.68274e-06	-0.73822	-1.63239e-06	-0.73822	-1.13373e-06
-0.73578	-1.67297e-06	-0.73578	-1.6217e-06	-0.73578	-1.12488e-06
-0.73334	-1.65833e-06	-0.73334	-1.6095e-06	-0.73334	-1.11633e-06
-0.7309	-1.64429e-06	-0.7309	-1.59576e-06	-0.7309	-1.11145e-06
-0.72845	-1.63605e-06	-0.72845	-1.58752e-06	-0.72845	-1.10687e-06
-0.72601	-1.62231e-06	-0.72601	-1.57684e-06	-0.72601	-1.09833e-06
-0.72357	-1.61255e-06	-0.72357	-1.56464e-06	-0.72357	-1.091e-06
-0.72113	-1.59851e-06	-0.72113	-1.55151e-06	-0.72113	-1.08337e-06
-0.71869	-1.58966e-06	-0.71869	-1.54327e-06	-0.71869	-1.07605e-06
-0.71625	-1.57867e-06	-0.71625	-1.53137e-06	-0.71625	-1.07117e-06
-0.71381	-1.56616e-06	-0.71381	-1.52222e-06	-0.71381	-1.06476e-06
-0.71136	-1.55457e-06	-0.71136	-1.51062e-06	-0.71136	-1.05774e-06
-0.70892	-1.54266e-06	-0.70892	-1.49872e-06	-0.70892	-1.05286e-06
-0.70648	-1.53076e-06	-0.70648	-1.48865e-06	-0.70648	-1.04645e-06
-0.70404	-1.521e-06	-0.70404	-1.4801e-06	-0.70404	-1.04126e-06
-0.7016	-1.50909e-06	-0.7016	-1.46851e-06	-0.7016	-1.03333e-06
-0.69916	-1.49658e-06	-0.69916	-1.45935e-06	-0.69916	-1.026e-06
-0.69672	-1.48376e-06	-0.69672	-1.44867e-06	-0.69672	-1.02081e-06
-0.69427	-1.47369e-06	-0.69427	-1.4389e-06	-0.69427	-1.01379e-06
-0.69183	-1.4621e-06	-0.69183	-1.4267e-06	-0.69183	-1.008e-06
-0.68939	-1.44989e-06	-0.68939	-1.41846e-06	-0.68939	-1.00433e-06
-0.68695	-1.43982e-06	-0.68695	-1.40686e-06	-0.68695	-9.95789e-07
-0.68451	-1.42975e-06	-0.68451	-1.39893e-06	-0.68451	-9.91821e-07
-0.68207	-1.41571e-06	-0.68207	-1.3858e-06	-0.68207	-9.84192e-07
-0.67963	-1.40594e-06	-0.67963	-1.37726e-06	-0.67963	-9.76868e-07
-0.67719	-1.39526e-06	-0.67719	-1.36688e-06	-0.67719	-9.71375e-07
-0.67474	-1.38214e-06	-0.67474	-1.35895e-06	-0.67474	-9.68018e-07
-0.6723	-1.37115e-06	-0.6723	-1.34735e-06	-0.6723	-9.59473e-07
-0.66986	-1.36017e-06	-0.66986	-1.3382e-06	-0.66986	-9.54285e-07
-0.66742	-1.34827e-06	-0.66742	-1.32751e-06	-0.66742	-9.48181e-07
-0.66498	-1.3385e-06	-0.66498	-1.31897e-06	-0.66498	-9.40552e-07
-0.66254	-1.32629e-06	-0.66254	-1.30829e-06	-0.66254	-9.36584e-07
-0.6601	-1.31714e-06	-0.6601	-1.30005e-06	-0.6601	-9.29565e-07
-0.65765	-1.30554e-06	-0.65765	-1.28998e-06	-0.65765	-9.25293e-07
-0.65521	-1.29425e-06	-0.65521	-1.28235e-06	-0.65521	-9.17358e-07
-0.65277	-1.28265e-06	-0.65277	-1.27045e-06	-0.65277	-9.1095e-07
-0.65033	-1.2735e-06	-0.65033	-1.26343e-06	-0.65033	-9.04846e-07
-0.64789	-1.25977e-06	-0.64789	-1.25183e-06	-0.64789	-9.00879e-07
-0.64545	-1.25031e-06	-0.64545	-1.2442e-06	-0.64545	-8.94165e-07
-0.64301	-1.24023e-06	-0.64301	-1.23535e-06	-0.64301	-8.86536e-07
-0.64056	-1.22925e-06	-0.64056	-1.22467e-06	-0.64056	-8.80432e-07
-0.63812	-1.21735e-06	-0.63812	-1.21643e-06	-0.63812	-8.73718e-07
-0.63568	-1.20819e-06	-0.63568	-1.21002e-06	-0.63568	-8.6853e-07
-0.63324	-1.19629e-06	-0.63324	-1.19843e-06	-0.63324	-8.61206e-07
-0.6308	-1.18622e-06	-0.6308	-1.18896e-06	-0.6308	-8.57849e-07
-0.62836	-1.17523e-06	-0.62836	-1.18256e-06	-0.62836	-8.48389e-07
-0.62592	-1.16577e-06	-0.62592	-1.17157e-06	-0.62592	-8.44421e-07
-0.62347	-1.1557e-06	-0.62347	-1.16333e-06	-0.62347	-8.38318e-07
-0.62103	-1.14319e-06	-0.62103	-1.15601e-06	-0.62103	-8.31909e-07
-0.61859	-1.13342e-06	-0.61859	-1.14716e-06	-0.61859	-8.26111e-07
-0.61615	-1.12305e-06	-0.61615	-1.13892e-06	-0.61615	-8.20007e-07
-0.61371	-1.1145e-06	-0.61371	-1.12671e-06	-0.61371	-8.12378e-07
-0.61127	-1.10199e-06	-0.61127	-1.12183e-06	-0.61127	-8.09326e-07
-0.60883	-1.091e-06	-0.60883	-1.11084e-06	-0.60883	-8.01697e-07
-0.60638	-1.08368e-06	-0.60638	-1.10443e-06	-0.60638	-7.9834e-07
-0.60394	-1.07056e-06	-0.60394	-1.09406e-06	-0.60394	-7.901e-07
-0.6015	-1.06201e-06	-0.6015	-1.08704e-06	-0.6015	-7.84302e-07
-0.59906	-1.05286e-06	-0.59906	-1.07758e-06	-0.59906	-7.79419e-07
-0.59662	-1.04279e-06	-0.59662	-1.06842e-06	-0.59662	-7.72705e-07
-0.59418	-1.02966e-06	-0.59418	-1.06018e-06	-0.59418	-7.67517e-07
-0.59174	-1.02173e-06	-0.59174	-1.05255e-06	-0.59174	-7.60498e-07
-0.58929	-1.01257e-06	-0.58929	-1.04523e-06	-0.58929	-7.5592e-07
-0.58685	-1.00311e-06	-0.58685	-1.03607e-06	-0.58685	-7.51953e-07
-0.58441	-9.92432e-07	-0.58441	-1.02905e-06	-0.58441	-7.44629e-07
-0.58197	-9.83887e-07	-0.58197	-1.01929e-06	-0.58197	-7.40967e-07
-0.57953	-9.74426e-07	-0.57953	-1.00922e-06	-0.57953	-7.33337e-07
-0.57709	-9.64661e-07	-0.57709	-1.00281e-06	-0.57709	-7.28149e-07
-0.57465	-9.53979e-07	-0.57465	-9.93958e-07	-0.57465	-7.20825e-07
-0.5722	-9.44214e-07	-0.5722	-9.85718e-07	-0.5722	-7.14417e-07
-0.56976	-9.33838e-07	-0.56976	-9.77783e-07	-0.56976	-7.09229e-07
-0.56732	-9.24377e-07	-0.56732	-9.69849e-07	-0.56732	-7.04346e-07
-0.56488	-9.14612e-07	-0.56488	-9.61914e-07	-0.56488	-6.96411e-07
-0.56244	-9.06677e-07	-0.56244	-9.54285e-07	-0.56244	-6.92139e-07
-0.56	-8.97217e-07	-0.56	-9.4696e-07	-0.56	-6.86646e-07
-0.55756	-8.88062e-07	-0.55756	-9.39636e-07	-0.55756	-6.79626e-07
-0.55511	-8.77075e-07	-0.55511	-9.30481e-07	-0.55511	-6.74133e-07
-0.55267	-8.69141e-07	-0.55267	-9.24377e-07	-0.55267	-6.6925e-07
-0.55023	-8.60291e-07	-0.55023	-9.15833e-07	-0.55023	-6.64063e-07
-0.54779	-8.5022e-07	-0.54779	-9.09119e-07	-0.54779	-6.5979e-07
-0.54535	-8.40149e-07	-0.54535	-9.00879e-07	-0.54535	-6.5033e-07
-0.54291	-8.30383e-07	-0.54291	-8.9386e-07	-0.54291	-6.49109e-07
-0.54047	-8.23059e-07	-0.54047	-8.84399e-07	-0.54047	-6.41785e-07
-0.53802	-8.12683e-07	-0.53802	-8.78906e-07	-0.53802	-6.37512e-07
-0.53558	-8.06274e-07	-0.53558	-8.69751e-07	-0.53558	-6.29578e-07
-0.53314	-7.96204e-07	-0.53314	-8.65479e-07	-0.53314	-6.26221e-07
-0.5307	-7.88574e-07	-0.5307	-8.56628e-07	-0.5307	-6.18591e-07
-0.52826	-7.79419e-07	-0.52826	-8.48694e-07	-0.52826	-6.14624e-07
-0.52582	-7.69958e-07	-0.52582	-8.42896e-07	-0.52582	-6.08521e-07
-0.52338	-7.62024e-07	-0.52338	-8.36792e-07	-0.52338	-6.04553e-07
-0.52094	-7.52258e-07	-0.52094	-8.28857e-07	-0.52094	-5.9906e-07
-0.51849	-7.44934e-07	-0.51849	-8.22144e-07	-0.51849	-5.91736e-07
-0.51605	-7.35168e-07	-0.51605	-8.12683e-07	-0.51605	-5.85632e-07
-0.51361	-7.27844e-07	-0.51361	-8.05969e-07	-0.51361	-5.82581e-07
-0.51117	-7.18384e-07	-0.51117	-8.00171e-07	-0.51117	-5.76172e-07
-0.50873	-7.11975e-07	-0.50873	-7.95898e-07	-0.50873	-5.70984e-07
-0.50629	-7.03125e-07	-0.50629	-7.86743e-07	-0.50629	-5.66406e-07
-0.50385	-6.94275e-07	-0.50385	-7.79419e-07	-0.50385	-5.61218e-07
-0.5014	-6.8634e-07	-0.5014	-7.74536e-07	-0.5014	-5.55725e-07
-0.49896	-6.76575e-07	-0.49896	-7.67517e-07	-0.49896	-5.48401e-07
-0.49652	-6.69861e-07	-0.49652	-7.58667e-07	-0.49652	-5.43518e-07
-0.49408	-6.62231e-07	-0.49408	-7.52258e-07	-0.49408	-5.38025e-07
-0.49164	-6.53687e-07	-0.49164	-7.4585e-07	-0.49164	-5.32227e-07
-0.4892	-6.47583e-07	-0.4892	-7.39441e-07	-0.4892	-5.27649e-07
-0.48676	-6.36902e-07	-0.48676	-7.32727e-07	-0.48676	-5.21545e-07
-0.48431	-6.30188e-07	-0.48431	-7.26929e-07	-0.48431	-5.18188e-07
-0.48187	-6.20728e-07	-0.48187	-7.20215e-07	-0.48187	-5.11169e-07
-0.47943	-6.12793e-07	-0.47943	-7.12891e-07	-0.47943	-5.06897e-07
-0.47699	-6.04248e-07	-0.47699	-7.06482e-07	-0.47699	-5.02014e-07
-0.47455	-5.97534e-07	-0.47455	-6.99768e-07	-0.47455	-4.9469e-07
-0.47211	-5.89294e-07	-0.47211	-6.91833e-07	-0.47211	-4.88586e-07
-0.46967	-5.82886e-07	-0.46967	-6.86951e-07	-0.46967	-4.82483e-07
-0.46722	-5.74951e-07	-0.46722	-6.82068e-07	-0.46722	-4.77905e-07
-0.46478	-5.67932e-07	-0.46478	-6.72607e-07	-0.46478	-4.73328e-07
-0.46234	-5.58472e-07	-0.46234	-6.66199e-07	-0.46234	-4.66858e-07
-0.4599	-5.52979e-07	-0.4599	-6.5918e-07	-0.4599	-4.61609e-07
-0.45746	-5.44739e-07	-0.45746	-6.51855e-07	-0.45746	-4.55017e-07
-0.45502	-5.37109e-07	-0.45502	-6.44836e-07	-0.45502	-4.5105e-07
-0.45258	-5.28259e-07	-0.45258	-6.38428e-07	-0.45258	-4.43573e-07
-0.45013	-5.22766e-07	-0.45013	-6.32935e-07	-0.45013	-4.40094e-07
-0.44769	-5.13306e-07	-0.44769	-6.25916e-07	-0.44769	-4.34113e-07
-0.44525	-5.05066e-07	-0.44525	-6.17676e-07	-0.44525	-4.29199e-07
-0.44281	-4.99573e-07	-0.44281	-6.14319e-07	-0.44281	-4.24316e-07
-0.44037	-4.91028e-07	-0.44037	-6.07605e-07	-0.44037	-4.19769e-07
-0.43793	-4.82788e-07	-0.43793	-5.99365e-07	-0.43793	-4.14154e-07
-0.43549	-4.75464e-07	-0.43549	-5.94788e-07	-0.43549	-4.09882e-07
-0.43304	-4.67834e-07	-0.43304	-5.87158e-07	-0.43304	-4.03381e-07
-0.4306	-4.61151e-07	-0.4306	-5.79834e-07	-0.4306	-3.99567e-07
-0.42816	-4.52759e-07	-0.42816	-5.74341e-07	-0.42816	-3.93158e-07
-0.42572	-4.44641e-07	-0.42572	-5.68237e-07	-0.42572	-3.90167e-07
-0.42328	-4.39514e-07	-0.42328	-5.59998e-07	-0.42328	-3.84338e-07
-0.42084	-4.31671e-07	-0.42084	-5.55725e-07	-0.42084	-3.78265e-07
-0.4184	-4.23523e-07	-0.4184	-5.49316e-07	-0.4184	-3.73413e-07
-0.41595	-4.16656e-07	-0.41595	-5.42603e-07	-0.41595	-3.70789e-07
-0.41351	-4.08447e-07	-0.41351	-5.35278e-07	-0.41351	-3.6557e-07
-0.41107	-4.03046e-07	-0.41107	-5.3009e-07	-0.41107	-3.59619e-07
-0.40863	-3.94867e-07	-0.40863	-5.21851e-07	-0.40863	-3.5318e-07
-0.40619	-3.86993e-07	-0.40619	-5.15747e-07	-0.40619	-3.50739e-07
-0.40375	-3.78723e-07	-0.40375	-5.09033e-07	-0.40375	-3.4433e-07
-0.40131	-3.7262e-07	-0.40131	-5.04456e-07	-0.40131	-3.40454e-07
-0.39886	-3.6554e-07	-0.39886	-4.95605e-07	-0.39886	-3.34564e-07
-0.39642	-3.57666e-07	-0.39642	-4.91028e-07	-0.39642	-3.29468e-07
-0.39398	-3.50952e-07	-0.39398	-4.81567e-07	-0.39398	-3.25043e-07
-0.39154	-3.42773e-07	-0.39154	-4.75159e-07	-0.39154	-3.20679e-07
-0.3891	-3.35632e-07	-0.3891	-4.70886e-07	-0.3891	-3.15338e-07
-0.38666	-3.28888e-07	-0.38666	-4.63867e-07	-0.38666	-3.10516e-07
-0.38422	-3.22937e-07	-0.38422	-4.5697e-07	-0.38422	-3.04535e-07
-0.38177	-3.13965e-07	-0.38177	-4.50928e-07	-0.38177	-3.00507e-07
-0.37933	-3.06091e-07	-0.37933	-4.43848e-07	-0.37933	-2.95837e-07
-0.37689	-3.01392e-07	-0.37689	-4.37988e-07	-0.37689	-2.91748e-07
-0.37445	-2.92847e-07	-0.37445	-4.32343e-07	-0.37445	-2.86316e-07
-0.37201	-2.87384e-07	-0.37201	-4.24438e-07	-0.37201	-2.80304e-07
-0.36957	-2.79175e-07	-0.36957	-4.18365e-07	-0.36957	-2.76215e-07
-0.36713	-2.71423e-07	-0.36713	-4.12262e-07	-0.36713	-2.70721e-07
-0.36469	-2.65045e-07	-0.36469	-4.06891e-07	-0.36469	-2.66174e-07
-0.36224	-2.58453e-07	-0.36224	-4.00635e-07	-0.36224	-2.60345e-07
-0.3598	-2.51129e-07	-0.3598	-3.93982e-07	-0.3598	-2.5415e-07
-0.35736	-2.44965e-07	-0.35736	-3.88245e-07	-0.35736	-2.51099e-07
-0.35492	-2.3703e-07	-0.35492	-3.80615e-07	-0.35492	-2.46948e-07
-0.35248	-2.31476e-07	-0.35248	-3.7442e-07	-0.35248	-2.43774e-07
-0.35004	-2.24152e-07	-0.35004	-3.67554e-07	-0.35004	-2.35352e-07
-0.3476	-2.17224e-07	-0.3476	-3.60657e-07	-0.3476	-2.31781e-07
-0.34515	-2.10419e-07	-0.34515	-3.54767e-07	-0.34515	-2.25677e-07
-0.34271	-2.04041e-07	-0.34271	-3.48877e-07	-0.34271	-2.21436e-07
-0.34027	-1.96747e-07	-0.34027	-3.42438e-07	-0.34027	-2.14417e-07
-0.33783	-1.91467e-07	-0.33783	-3.35876e-07	-0.33783	-2.09686e-07
-0.33539	-1.83868e-07	-0.33539	-3.28644e-07	-0.33539	-2.04193e-07
-0.33295	-1.76666e-07	-0.33295	-3.23547e-07	-0.33295	-1.99738e-07
-0.33051	-1.70593e-07	-0.33051	-3.16376e-07	-0.33051	-1.95587e-07
-0.32806	-1.64001e-07	-0.32806	-3.09906e-07	-0.32806	-1.8869e-07
-0.32562	-1.58691e-07	-0.32562	-3.03711e-07	-0.32562	-1.84052e-07
-0.32318	-1.53046e-07	-0.32318	-2.9715e-07	-0.32318	-1.78345e-07
-0.32074	-1.46606e-07	-0.32074	-2.91656e-07	-0.32074	-1.7215e-07
-0.3183	-1.40228e-07	-0.3183	-2.84302e-07	-0.3183	-1.66718e-07
-0.31586	-1.32629e-07	-0.31586	-2.76703e-07	-0.31586	-1.62659e-07
-0.31342	-1.27472e-07	-0.31342	-2.72308e-07	-0.31342	-1.57593e-07
-0.31097	-1.22589e-07	-0.31097	-2.6474e-07	-0.31097	-1.51733e-07
-0.30853	-1.15143e-07	-0.30853	-2.58728e-07	-0.30853	-1.4566e-07
-0.30609	-1.10626e-07	-0.30609	-2.53296e-07	-0.30609	-1.40533e-07
-0.30365	-1.03424e-07	-0.30365	-2.46033e-07	-0.30365	-1.35895e-07
-0.30121	-9.79614e-08	-0.30121	-2.37976e-07	-0.30121	-1.29761e-07
-0.29877	-9.26514e-08	-0.29877	-2.32483e-07	-0.29877	-1.22894e-07
-0.29633	-8.64868e-08	-0.29633	-2.25922e-07	-0.29633	-1.17859e-07
-0.29388	-8.06885e-08	-0.29388	-2.18628e-07	-0.29388	-1.1319e-07
-0.29144	-7.64771e-08	-0.29144	-2.12982e-07	-0.29144	-1.07605e-07
-0.289	-7.04651e-08	-0.289	-2.05658e-07	-0.289	-1.01532e-07
-0.28656	-6.51855e-08	-0.28656	-1.98029e-07	-0.28656	-9.67407e-08
-0.28412	-5.9906e-08	-0.28412	-1.93542e-07	-0.28412	-8.99658e-08
-0.28168	-5.41992e-08	-0.28168	-1.84814e-07	-0.28168	-8.40454e-08
-0.27924	-4.91028e-08	-0.27924	-1.78955e-07	-0.27924	-7.82166e-08
-0.27679	-4.33044e-08	-0.27679	-1.73035e-07	-0.27679	-7.36084e-08
-0.27435	-3.83606e-08	-0.27435	-1.65802e-07	-0.27435	-6.70776e-08
-0.27191	-3.28064e-08	-0.27191	-1.59393e-07	-0.27191	-6.43005e-08
-0.26947	-2.78015e-08	-0.26947	-1.52252e-07	-0.26947	-5.77393e-08
-0.26703	-2.26135e-08	-0.26703	-1.44409e-07	-0.26703	-5.01404e-08
-0.26459	-1.84021e-08	-0.26459	-1.37207e-07	-0.26459	-4.56238e-08
-0.26215	-1.35193e-08	-0.26215	-1.30432e-07	-0.26215	-3.7384e-08
-0.2597	-9.06372e-09	-0.2597	-1.25549e-07	-0.2597	-3.26843e-08
-0.25726	-4.76074e-09	-0.25726	-1.17706e-07	-0.25726	-2.5238e-08
-0.25482	8.54492e-10	-0.25482	-1.10962e-07	-0.25482	-1.86157e-08
-0.25238	5.34058e-09	-0.25238	-1.04919e-07	-0.25238	-1.31531e-08
-0.24994	8.42285e-09	-0.24994	-9.7168e-08	-0.24994	-8.5144e-09
-0.2475	1.37939e-08	-0.2475	-9.06372e-08	-0.2475	-2.10571e-09
-0.24506	1.8158e-08	-0.24506	-8.48694e-08	-0.24506	3.87573e-09
-0.24261	2.2644e-08	-0.24261	-7.67212e-08	-0.24261	1.03455e-08
-0.24017	2.66724e-08	-0.24017	-7.11975e-08	-0.24017	1.5564e-08
-0.23773	3.11279e-08	-0.23773	-6.39038e-08	-0.23773	2.24609e-08
-0.23529	3.5675e-08	-0.23529	-5.73425e-08	-0.23529	2.771e-08
-0.23285	4.01917e-08	-0.23285	-5.02014e-08	-0.23285	3.59802e-08
-0.23041	4.52881e-08	-0.23041	-4.17175e-08	-0.23041	4.1687e-08
-0.22797	4.80042e-08	-0.22797	-3.65906e-08	-0.22797	4.74854e-08
-0.22552	5.33447e-08	-0.22552	-3.07922e-08	-0.22552	5.44434e-08
-0.22308	5.8197e-08	-0.22308	-2.13318e-08	-0.22308	6.25305e-08
-0.22064	6.05469e-08	-0.22064	-1.62964e-08	-0.22064	6.71692e-08
-0.2182	6.60706e-08	-0.2182	-7.17163e-09	-0.2182	7.39441e-08
-0.21576	6.87866e-08	-0.21576	-1.67847e-09	-0.21576	8.22449e-08
-0.21332	7.26013e-08	-0.21332	4.11987e-09	-0.21332	8.61511e-08
-0.21088	7.67517e-08	-0.21088	1.04065e-08	-0.21088	9.14307e-08
-0.20844	8.0658e-08	-0.20844	1.68762e-08	-0.20844	9.9762e-08
-0.20599	8.34656e-08	-0.20599	2.47192e-08	-0.20599	1.0437e-07
-0.20355	8.74329e-08	-0.20355	3.11279e-08	-0.20355	1.12e-07
-0.20111	9.00574e-08	-0.20111	3.91235e-08	-0.20111	1.17554e-07
-0.19867	9.49402e-08	-0.19867	4.55017e-08	-0.19867	1.24969e-07
-0.19623	9.92737e-08	-0.19623	5.23987e-08	-0.19623	1.31592e-07
-0.19379	1.00891e-07	-0.19379	6.01807e-08	-0.19379	1.3858e-07
-0.19135	1.05377e-07	-0.19135	6.58875e-08	-0.19135	1.46057e-07
-0.1889	1.0733e-07	-0.1889	7.27539e-08	-0.1889	1.51794e-07
-0.18646	1.11023e-07	-0.18646	7.91626e-08	-0.18646	1.59698e-07
-0.18402	1.1615e-07	-0.18402	8.53271e-08	-0.18402	1.66809e-07
-0.18158	1.17432e-07	-0.18158	9.06677e-08	-0.18158	1.73615e-07
-0.17914	1.21765e-07	-0.17914	9.66187e-08	-0.17914	1.81274e-07
-0.1767	1.24023e-07	-0.1767	1.04248e-07	-0.1767	1.86981e-07
-0.17426	1.28601e-07	-0.17426	1.11237e-07	-0.17426	1.95282e-07
-0.17181	1.31439e-07	-0.17181	1.17065e-07	-0.17181	2.02118e-07
-0.16937	1.34094e-07	-0.16937	1.21307e-07	-0.16937	2.09808e-07
-0.16693	1.37421e-07	-0.16693	1.28906e-07	-0.16693	2.18658e-07
-0.16449	1.40808e-07	-0.16449	1.37177e-07	-0.16449	2.25983e-07
-0.16205	1.42822e-07	-0.16205	1.43188e-07	-0.16205	2.32361e-07
-0.15961	1.48102e-07	-0.15961	1.4975e-07	-0.15961	2.39532e-07
-0.15717	1.50604e-07	-0.15717	1.53717e-07	-0.15717	2.47101e-07
-0.15472	1.53809e-07	-0.15472	1.60553e-07	-0.15472	2.55676e-07
-0.15228	1.56158e-07	-0.15228	1.67664e-07	-0.15228	2.63153e-07
-0.14984	1.58386e-07	-0.14984	1.745e-07	-0.14984	2.70844e-07
-0.1474	1.6156e-07	-0.1474	1.80328e-07	-0.1474	2.78931e-07
-0.14496	1.65619e-07	-0.14496	1.86737e-07	-0.14496	2.87231e-07
-0.14252	1.67297e-07	-0.14252	1.93115e-07	-0.14252	2.95624e-07
-0.14008	1.71173e-07	-0.14008	2.00287e-07	-0.14008	3.05267e-07
-0.13763	1.73798e-07	-0.13763	2.04437e-07	-0.13763	3.12744e-07
-0.13519	1.76575e-07	-0.13519	2.12494e-07	-0.13519	3.21442e-07
-0.13275	1.79321e-07	-0.13275	2.16278e-07	-0.13275	3.30688e-07
-0.13031	1.82068e-07	-0.13031	2.24823e-07	-0.13031	3.36578e-07
-0.12787	1.86005e-07	-0.12787	2.30103e-07	-0.12787	3.46039e-07
-0.12543	1.88141e-07	-0.12543	2.37274e-07	-0.12543	3.54462e-07
-0.12299	1.90216e-07	-0.12299	2.4295e-07	-0.12299	3.64685e-07
-0.12054	1.93848e-07	-0.12054	2.48657e-07	-0.12054	3.7323e-07
-0.1181	1.96655e-07	-0.1181	2.53876e-07	-0.1181	3.83087e-07
-0.11566	1.987e-07	-0.11566	2.60498e-07	-0.11566	3.927e-07
-0.11322	2.02026e-07	-0.11322	2.66815e-07	-0.11322	3.99231e-07
-0.11078	2.04376e-07	-0.11078	2.73346e-07	-0.11078	4.10004e-07
-0.10834	2.06604e-07	-0.10834	2.80365e-07	-0.10834	4.18396e-07
-0.1059	2.1048e-07	-0.1059	2.86957e-07	-0.1059	4.29138e-07
-0.10345	2.13074e-07	-0.10345	2.91931e-07	-0.10345	4.38232e-07
-0.10101	2.16156e-07	-0.10101	2.98676e-07	-0.10101	4.4812e-07
-0.09857	2.17438e-07	-0.09857	3.02795e-07	-0.09857	4.5639e-07
-0.09613	2.21283e-07	-0.09613	3.1134e-07	-0.09613	4.67194e-07
-0.09369	2.2403e-07	-0.09369	3.15674e-07	-0.09369	4.75952e-07
-0.09125	2.27112e-07	-0.09125	3.23273e-07	-0.09125	4.86694e-07
-0.08881	2.28882e-07	-0.08881	3.28369e-07	-0.08881	4.96368e-07
-0.08636	2.31354e-07	-0.08636	3.36029e-07	-0.08636	5.06927e-07
-0.08392	2.33215e-07	-0.08392	3.41705e-07	-0.08392	5.17517e-07
-0.08148	2.37335e-07	-0.08148	3.47839e-07	-0.08148	5.29266e-07
-0.07904	2.3999e-07	-0.07904	3.53851e-07	-0.07904	5.37903e-07
-0.0766	2.42645e-07	-0.0766	3.60046e-07	-0.0766	5.48798e-07
-0.07416	2.4472e-07	-0.07416	3.66852e-07	-0.07416	5.59631e-07
-0.07172	2.46887e-07	-0.07172	3.73505e-07	-0.07172	5.70251e-07
-0.06927	2.50824e-07	-0.06927	3.79425e-07	-0.06927	5.82092e-07
-0.06683	2.53021e-07	-0.06683	3.87085e-07	-0.06683	5.94971e-07
-0.06439	2.55066e-07	-0.06439	3.90961e-07	-0.06439	6.03485e-07
-0.06195	2.5827e-07	-0.06195	3.97797e-07	-0.06195	6.14624e-07
-0.05951	2.61536e-07	-0.05951	4.05914e-07	-0.05951	6.23779e-07
-0.05707	2.65015e-07	-0.05707	4.13666e-07	-0.05707	6.37207e-07
-0.05463	2.66571e-07	-0.05463	4.1803e-07	-0.05463	6.47583e-07
-0.05219	2.68677e-07	-0.05219	4.2572e-07	-0.05219	6.58875e-07
-0.04974	2.72217e-07	-0.04974	4.32648e-07	-0.04974	6.69556e-07
-0.0473	2.75238e-07	-0.0473	4.40582e-07	-0.0473	6.81152e-07
-0.04486	2.78076e-07	-0.04486	4.45343e-07	-0.04486	6.94885e-07
-0.04242	2.80334e-07	-0.04242	4.52484e-07	-0.04242	7.07397e-07
-0.03998	2.82654e-07	-0.03998	4.59045e-07	-0.03998	7.18384e-07
-0.03754	2.86133e-07	-0.03754	4.66705e-07	-0.03754	7.2998e-07
-0.0351	2.87445e-07	-0.0351	4.72473e-07	-0.0351	7.42493e-07
-0.03265	2.92084e-07	-0.03265	4.81659e-07	-0.03265	7.5592e-07
-0.03021	2.94281e-07	-0.03021	4.87061e-07	-0.03021	7.67822e-07
-0.02777	2.96387e-07	-0.02777	4.96429e-07	-0.02777	7.80334e-07
-0.02533	3.0069e-07	-0.02533	5.01465e-07	-0.02533	7.91626e-07
-0.02289	3.03375e-07	-0.02289	5.10468e-07	-0.02289	8.04749e-07
-0.02045	3.05389e-07	-0.02045	5.16785e-07	-0.02045	8.17871e-07
-0.01801	3.08228e-07	-0.01801	5.24689e-07	-0.01801	8.31604e-07
-0.01556	3.10913e-07	-0.01556	5.33051e-07	-0.01556	8.42896e-07
-0.01312	3.15063e-07	-0.01312	5.40344e-07	-0.01312	8.58765e-07
-0.01068	3.17993e-07	-0.01068	5.47974e-07	-0.01068	8.69446e-07
-0.00824	3.20221e-07	-0.00824	5.56824e-07	-0.00824	8.84705e-07
-0.0058	3.24036e-07	-0.0058	5.65399e-07	-0.0058	8.98438e-07
-0.00336	3.27057e-07	-0.00336	5.72418e-07	-0.00336	9.1217e-07
-0.000915527	3.29315e-07	-0.000915527	5.80322e-07	-0.000915527	9.26208e-07
0.00153	3.32825e-07	0.00153	5.88531e-07	0.00153	9.39636e-07
0.00397	3.3606e-07	0.00397	5.97351e-07	0.00397	9.53979e-07
0.00641	3.38226e-07	0.00641	6.05133e-07	0.00641	9.67712e-07
0.00885	3.4079e-07	0.00885	6.13403e-07	0.00885	9.8175e-07
0.01129	3.44757e-07	0.01129	6.20728e-07	0.01129	9.97925e-07
0.01373	3.48297e-07	0.01373	6.31104e-07	0.01373	1.01074e-06
0.01617	3.51624e-07	0.01617	6.41785e-07	0.01617	1.02478e-06
0.01862	3.5437e-07	0.01862	6.48499e-07	0.01862	1.04156e-06
0.02106	3.58795e-07	0.02106	6.58569e-07	0.02106	1.05804e-06
0.0235	3.62091e-07	0.0235	6.67419e-07	0.0235	1.07147e-06
0.02594	3.65967e-07	0.02594	6.77185e-07	0.02594	1.08704e-06
0.02838	3.69202e-07	0.02838	6.86646e-07	0.02838	1.1026e-06
0.03082	3.72101e-07	0.03082	6.96716e-07	0.03082	1.11816e-06
0.03326	3.76373e-07	0.03326	7.04041e-07	0.03326	1.13525e-06
0.03571	3.80035e-07	0.03571	7.15027e-07	0.03571	1.15051e-06
0.03815	3.83484e-07	0.03815	7.26318e-07	0.03815	1.1676e-06
0.04059	3.87207e-07	0.04059	7.36389e-07	0.04059	1.18439e-06
0.04303	3.91418e-07	0.04303	7.46155e-07	0.04303	1.19934e-06
0.04547	3.94165e-07	0.04547	7.58057e-07	0.04547	1.21643e-06
0.04791	3.98041e-07	0.04791	7.68433e-07	0.04791	1.23383e-06
0.05035	4.03137e-07	0.05035	7.80334e-07	0.05035	1.25092e-06
0.0528	4.0567e-07	0.0528	7.92542e-07	0.0528	1.26892e-06
0.05524	4.11041e-07	0.05524	8.03528e-07	0.05524	1.28723e-06
0.05768	4.14673e-07	0.05768	8.12988e-07	0.05768	1.30402e-06
0.06012	4.19739e-07	0.06012	8.24585e-07	0.06012	1.32172e-06
0.06256	4.23279e-07	0.06256	8.36182e-07	0.06256	1.33881e-06
0.065	4.25842e-07	0.065	8.49304e-07	0.065	1.35773e-06
0.06744	4.30664e-07	0.06744	8.61206e-07	0.06744	1.37512e-06
0.06989	4.35852e-07	0.06989	8.74023e-07	0.06989	1.3974e-06
0.07233	4.39758e-07	0.07233	8.84399e-07	0.07233	1.41235e-06
0.07477	4.45587e-07	0.07477	8.99963e-07	0.07477	1.43494e-06
0.07721	4.48456e-07	0.07721	9.13086e-07	0.07721	1.45233e-06
0.07965	4.53735e-07	0.07965	9.28345e-07	0.07965	1.47339e-06
0.08209	4.57977e-07	0.08209	9.40552e-07	0.08209	1.49261e-06
0.08453	4.62158e-07	0.08453	9.5459e-07	0.08453	1.51337e-06
0.08698	4.66766e-07	0.08698	9.68933e-07	0.08698	1.5332e-06
0.08942	4.73511e-07	0.08942	9.80835e-07	0.08942	1.55579e-06
0.09186	4.77234e-07	0.09186	9.96399e-07	0.09186	1.5741e-06
0.0943	4.83795e-07	0.0943	1.01318e-06	0.0943	1.59698e-06
0.09674	4.87549e-07	0.09674	1.02692e-06	0.09674	1.61835e-06
0.09918	4.9353e-07	0.09918	1.04218e-06	0.09918	1.6391e-06
0.10162	4.98505e-07	0.10162	1.05652e-06	0.10162	1.65894e-06
0.10406	5.03174e-07	0.10406	1.07422e-06	0.10406	1.68182e-06
0.10651	5.08484e-07	0.10651	1.09161e-06	0.10651	1.70197e-06
0.10895	5.14954e-07	0.10895	1.10718e-06	0.10895	1.72729e-06
0.11139	5.19775e-07	0.11139	1.12457e-06	0.11139	1.74744e-06
0.11383	5.26855e-07	0.11383	1.14197e-06	0.11383	1.77094e-06
0.11627	5.31403e-07	0.11627	1.15875e-06	0.11627	1.79291e-06
0.11871	5.38116e-07	0.11871	1.17798e-06	0.11871	1.81671e-06
0.12115	5.43823e-07	0.12115	1.19385e-06	0.12115	1.84113e-06
0.1236	5.49469e-07	0.1236	1.21155e-06	0.1236	1.86371e-06
0.12604	5.55786e-07	0.12604	1.23108e-06	0.12604	1.88873e-06
0.12848	5.62805e-07	0.12848	1.25122e-06	0.12848	1.91437e-06
0.13092	5.68237e-07	0.13092	1.26892e-06	0.13092	1.93604e-06
0.13336	5.76538e-07	0.13336	1.28998e-06	0.13336	1.96045e-06
0.1358	5.81085e-07	0.1358	1.30798e-06	0.1358	1.98608e-06
0.13824	5.89844e-07	0.13824	1.32813e-06	0.13824	2.01202e-06
0.14069	5.95764e-07	0.14069	1.34857e-06	0.14069	2.03644e-06
0.14313	6.02478e-07	0.14313	1.37054e-06	0.14313	2.06116e-06
0.14557	6.08826e-07	0.14557	1.39191e-06	0.14557	2.08649e-06
0.14801	6.16455e-07	0.14801	1.41357e-06	0.14801	2.11395e-06
0.15045	6.2439e-07	0.15045	1.43524e-06	0.15045	2.13898e-06
0.15289	6.31714e-07	0.15289	1.45844e-06	0.15289	2.16736e-06
0.15533	6.38428e-07	0.15533	1.47888e-06	0.15533	2.19177e-06
0.15778	6.45752e-07	0.15778	1.50269e-06	0.15778	2.21802e-06
0.16022	6.52771e-07	0.16022	1.52527e-06	0.16022	2.24518e-06
0.16266	6.60706e-07	0.16266	1.5506e-06	0.16266	2.2702e-06
0.1651	6.70471e-07	0.1651	1.57471e-06	0.1651	2.29797e-06
0.16754	6.77795e-07	0.16754	1.59851e-06	0.16754	2.32758e-06
0.16998	6.87866e-07	0.16998	1.62415e-06	0.16998	2.35046e-06
0.17242	6.94885e-07	0.17242	1.64948e-06	0.17242	2.37915e-06
0.17487	7.04346e-07	0.17487	1.67511e-06	0.17487	2.4057e-06
0.17731	7.1228e-07	0.17731	1.70166e-06	0.17731	2.43561e-06
0.17975	7.22046e-07	0.17975	1.72607e-06	0.17975	2.46063e-06
0.18219	7.33337e-07	0.18219	1.75476e-06	0.18219	2.48901e-06
0.18463	7.40967e-07	0.18463	1.77979e-06	0.18463	2.51495e-06
0.18707	7.50427e-07	0.18707	1.81061e-06	0.18707	2.54547e-06
0.18951	7.61108e-07	0.18951	1.83777e-06	0.18951	2.56958e-06
0.19196	7.71179e-07	0.19196	1.86646e-06	0.19196	2.60101e-06
0.1944	7.8064e-07	0.1944	1.89484e-06	0.1944	2.62665e-06
0.19684	7.9071e-07	0.19684	1.92505e-06	0.19684	2.6535e-06
0.19928	8.01392e-07	0.19928	1.95343e-06	0.19928	2.68097e-06
0.20172	8.11157e-07	0.20172	1.98395e-06	0.20172	2.70996e-06
0.20416	8.23059e-07	0.20416	2.01355e-06	0.20416	2.73499e-06
0.2066	8.3313e-07	0.2066	2.04712e-06	0.2066	2.76337e-06
0.20905	8.43201e-07	0.20905	2.07794e-06	0.20905	2.79022e-06
0.21149	8.55408e-07	0.21149	2.10938e-06	0.21149	2.81891e-06
0.21393	8.65784e-07	0.21393	2.1405e-06	0.21393	2.84332e-06
0.21637	8.78906e-07	0.21637	2.17407e-06	0.21637	2.87079e-06
0.21881	8.88062e-07	0.21881	2.20551e-06	0.21881	2.89642e-06
0.22125	9.00879e-07	0.22125	2.23877e-06	0.22125	2.92358e-06
0.22369	9.13391e-07	0.22369	2.27325e-06	0.22369	2.94922e-06
0.22614	9.26514e-07	0.22614	2.30713e-06	0.22614	2.97363e-06
0.22858	9.38721e-07	0.22858	2.34009e-06	0.22858	2.99896e-06
0.23102	9.50623e-07	0.23102	2.37854e-06	0.23102	3.02368e-06
0.23346	9.64661e-07	0.23346	2.4118e-06	0.23346	3.04932e-06
0.2359	9.75952e-07	0.2359	2.44659e-06	0.2359	3.07373e-06
0.23834	9.88464e-07	0.23834	2.48108e-06	0.23834	3.09448e-06
0.24078	1.0022e-06	0.24078	2.52075e-06	0.24078	3.1192e-06
0.24323	1.01715e-06	0.24323	2.55585e-06	0.24323	3.14117e-06
0.24567	1.03119e-06	0.24567	2.59521e-06	0.24567	3.16437e-06
0.24811	1.04523e-06	0.24811	2.63062e-06	0.24811	3.18451e-06
0.25055	1.05896e-06	0.25055	2.66937e-06	0.25055	3.20618e-06
0.25299	1.07147e-06	0.25299	2.7066e-06	0.25299	3.2254e-06
0.25543	1.08765e-06	0.25543	2.74414e-06	0.25543	3.24524e-06
0.25787	1.10352e-06	0.25787	2.7829e-06	0.25787	3.26447e-06
0.26031	1.11725e-06	0.26031	2.82227e-06	0.26031	3.28217e-06
0.26276	1.1319e-06	0.26276	2.86194e-06	0.26276	3.29926e-06
0.2652	1.1499e-06	0.2652	2.901e-06	0.2652	3.31909e-06
0.26764	1.16272e-06	0.26764	2.93976e-06	0.26764	3.33588e-06
0.27008	1.17981e-06	0.27008	2.98279e-06	0.27008	3.35205e-06
0.27252	1.19537e-06	0.27252	3.01971e-06	0.27252	3.36456e-06
0.27496	1.21185e-06	0.27496	3.06061e-06	0.27496	3.38013e-06
0.2774	1.22772e-06	0.2774	3.09998e-06	0.2774	3.39539e-06
0.27985	1.2439e-06	0.27985	3.14087e-06	0.27985	3.40637e-06
0.28229	1.26099e-06	0.28229	3.18298e-06	0.28229	3.41736e-06
0.28473	1.27899e-06	0.28473	3.22357e-06	0.28473	3.42804e-06
0.28717	1.29395e-06	0.28717	3.26355e-06	0.28717	3.43658e-06
0.28961	1.31287e-06	0.28961	3.30566e-06	0.28961	3.44757e-06
0.29205	1.32935e-06	0.29205	3.34564e-06	0.29205	3.45428e-06
0.29449	1.34644e-06	0.29449	3.38776e-06	0.29449	3.46161e-06
0.29694	1.36475e-06	0.29694	3.42804e-06	0.29694	3.46649e-06
0.29938	1.38275e-06	0.29938	3.46832e-06	0.29938	3.47321e-06
0.30182	1.40076e-06	0.30182	3.51074e-06	0.30182	3.47809e-06
0.30426	1.4212e-06	0.30426	3.55316e-06	0.30426	3.48022e-06
0.3067	1.43707e-06	0.3067	3.59253e-06	0.3067	3.48389e-06
0.30914	1.45782e-06	0.30914	3.63312e-06	0.30914	3.48663e-06
0.31158	1.47583e-06	0.31158	3.6734e-06	0.31158	3.4848e-06
0.31403	1.49475e-06	0.31403	3.71521e-06	0.31403	3.48755e-06
0.31647	1.51398e-06	0.31647	3.75366e-06	0.31647	3.48663e-06
0.31891	1.53229e-06	0.31891	3.79456e-06	0.31891	3.48267e-06
0.32135	1.5509e-06	0.32135	3.83331e-06	0.32135	3.48358e-06
0.32379	1.57196e-06	0.32379	3.87451e-06	0.32379	3.48236e-06
0.32623	1.59027e-06	0.32623	3.91357e-06	0.32623	3.47534e-06
0.32867	1.61102e-06	0.32867	3.95325e-06	0.32867	3.47229e-06
0.33112	1.63116e-06	0.33112	3.98956e-06	0.33112	3.46619e-06
0.33356	1.65161e-06	0.33356	4.02893e-06	0.33356	3.46069e-06
0.336	1.66992e-06	0.336	4.06555e-06	0.336	3.45367e-06
0.33844	1.69037e-06	0.33844	4.10126e-06	0.33844	3.44757e-06
0.34088	1.71204e-06	0.34088	4.1394e-06	0.34088	3.44086e-06
0.34332	1.73218e-06	0.34332	4.17755e-06	0.34332	3.43414e-06
0.34576	1.75293e-06	0.34576	4.21143e-06	0.34576	3.4259e-06
0.34821	1.77277e-06	0.34821	4.24652e-06	0.34821	3.41675e-06
0.35065	1.79382e-06	0.35065	4.2804e-06	0.35065	3.40759e-06
0.35309	1.81488e-06	0.35309	4.31366e-06	0.35309	3.39722e-06
0.35553	1.83502e-06	0.35553	4.34326e-06	0.35553	3.38684e-06
0.35797	1.85669e-06	0.35797	4.37714e-06	0.35797	3.37677e-06
0.36041	1.87653e-06	0.36041	4.40826e-06	0.36041	3.367e-06
0.36285	1.89911e-06	0.36285	4.43878e-06	0.36285	3.35876e-06
0.3653	1.91803e-06	0.3653	4.46625e-06	0.3653	3.34534e-06
0.36774	1.94092e-06	0.36774	4.49402e-06	0.36774	3.33893e-06
0.37018	1.9632e-06	0.37018	4.5224e-06	0.37018	3.32733e-06
0.37262	1.98608e-06	0.37262	4.54742e-06	0.37262	3.31696e-06
0.37506	2.00562e-06	0.37506	4.57275e-06	0.37506	3.30566e-06
0.3775	2.02576e-06	0.3775	4.59534e-06	0.3775	3.29529e-06
0.37994	2.04926e-06	0.37994	4.6167e-06	0.37994	3.28339e-06
0.38239	2.07214e-06	0.38239	4.6402e-06	0.38239	3.27484e-06
0.38483	2.09198e-06	0.38483	4.65881e-06	0.38483	3.26324e-06
0.38727	2.11426e-06	0.38727	4.67773e-06	0.38727	3.25165e-06
0.38971	2.13501e-06	0.38971	4.69269e-06	0.38971	3.24219e-06
0.39215	2.15881e-06	0.39215	4.70947e-06	0.39215	3.23059e-06
0.39459	2.17712e-06	0.39459	4.72504e-06	0.39459	3.22113e-06
0.39703	2.20001e-06	0.39703	4.73602e-06	0.39703	3.21167e-06
0.39948	2.22198e-06	0.39948	4.74518e-06	0.39948	3.19824e-06
0.40192	2.24457e-06	0.40192	4.75647e-06	0.40192	3.19183e-06
0.40436	2.26685e-06	0.40436	4.76257e-06	0.40436	3.17963e-06
0.4068	2.28973e-06	0.4068	4.7702e-06	0.4068	3.17291e-06
0.40924	2.30927e-06	0.40924	4.77325e-06	0.40924	3.16284e-06
0.41168	2.33215e-06	0.41168	4.776e-06	0.41168	3.15125e-06
0.41412	2.35321e-06	0.41412	4.7757e-06	0.41412	3.13965e-06
0.41656	2.37579e-06	0.41656	4.77509e-06	0.41656	3.13293e-06
0.41901	2.39716e-06	0.41901	4.77448e-06	0.41901	3.12592e-06
0.42145	2.42004e-06	0.42145	4.77173e-06	0.42145	3.11554e-06
0.42389	2.43988e-06	0.42389	4.76471e-06	0.42389	3.10791e-06
0.42633	2.46277e-06	0.42633	4.75739e-06	0.42633	3.10059e-06
0.42877	2.48322e-06	0.42877	4.74609e-06	0.42877	3.09357e-06
0.43121	2.50549e-06	0.43121	4.73694e-06	0.43121	3.08411e-06
0.43365	2.52747e-06	0.43365	4.72534e-06	0.43365	3.07678e-06
0.4361	2.55066e-06	0.4361	4.71039e-06	0.4361	3.06915e-06
0.43854	2.57202e-06	0.43854	4.69574e-06	0.43854	3.06366e-06
0.44098	2.59338e-06	0.44098	4.68109e-06	0.44098	3.05634e-06
0.44342	2.61475e-06	0.44342	4.66095e-06	0.44342	3.04962e-06
0.44586	2.63763e-06	0.44586	4.64417e-06	0.44586	3.0426e-06
0.4483	2.659e-06	0.4483	4.62036e-06	0.4483	3.03711e-06
0.45074	2.6825e-06	0.45074	4.59961e-06	0.45074	3.03253e-06
0.45319	2.70294e-06	0.45319	4.5755e-06	0.45319	3.0249e-06
0.45563	2.72583e-06	0.45563	4.55078e-06	0.45563	3.02032e-06
0.45807	2.74475e-06	0.45807	4.52606e-06	0.45807	3.01544e-06
0.46051	2.771e-06	0.46051	4.50043e-06	0.46051	3.00995e-06
0.46295	2.78992e-06	0.46295	4.47327e-06	0.46295	3.00354e-06
0.46539	2.81494e-06	0.46539	4.44702e-06	0.46539	3.00018e-06
0.46783	2.83447e-06	0.46783	4.41681e-06	0.46783	2.99255e-06
0.47028	2.85706e-06	0.47028	4.38873e-06	0.47028	2.99011e-06
0.47272	2.87933e-06	0.47272	4.35883e-06	0.47272	2.9834e-06
0.47516	2.90222e-06	0.47516	4.32953e-06	0.47516	2.9776e-06
0.4776	2.9248e-06	0.4776	4.29932e-06	0.4776	2.97485e-06
0.48004	2.94617e-06	0.48004	4.26788e-06	0.48004	2.9715e-06
0.48248	2.96906e-06	0.48248	4.23676e-06	0.48248	2.9657e-06
0.48492	2.99103e-06	0.48492	4.20776e-06	0.48492	2.96173e-06
0.48737	3.01178e-06	0.48737	4.17511e-06	0.48737	2.95502e-06
0.48981	3.03558e-06	0.48981	4.14368e-06	0.48981	2.95319e-06
0.49225	3.05603e-06	0.49225	4.11255e-06	0.49225	2.95105e-06
0.49469	3.08044e-06	0.49469	4.07898e-06	0.49469	2.94495e-06
0.49713	3.10211e-06	0.49713	4.05029e-06	0.49713	2.94373e-06
0.49957	3.12531e-06	0.49957	4.0213e-06	0.49957	2.94281e-06
0.50201	3.14667e-06	0.50201	3.98895e-06	0.50201	2.94006e-06
0.50446	3.16711e-06	0.50446	3.95752e-06	0.50446	2.9364e-06
0.5069	3.19061e-06	0.5069	3.92761e-06	0.5069	2.93732e-06
0.50934	3.2132e-06	0.50934	3.89771e-06	0.50934	2.93304e-06
0.51178	3.23517e-06	0.51178	3.8681e-06	0.51178	2.92938e-06
0.51422	3.25806e-06	0.51422	3.83881e-06	0.51422	2.93091e-06
0.51666	3.27911e-06	0.51666	3.80951e-06	0.51666	2.92999e-06
0.5191	3.3017e-06	0.5191	3.78143e-06	0.5191	2.93335e-06
0.52155	3.32672e-06	0.52155	3.75122e-06	0.52155	2.92877e-06
0.52399	3.34686e-06	0.52399	3.72711e-06	0.52399	2.92938e-06
0.52643	3.36731e-06	0.52643	3.69965e-06	0.52643	2.92755e-06
0.52887	3.38989e-06	0.52887	3.6734e-06	0.52887	2.92908e-06
0.53131	3.41156e-06	0.53131	3.64624e-06	0.53131	2.92694e-06
0.53375	3.43475e-06	0.53375	3.62335e-06	0.53375	2.92969e-06
0.53619	3.45673e-06	0.53619	3.59436e-06	0.53619	2.92969e-06
0.53864	3.47626e-06	0.53864	3.573e-06	0.53864	2.93152e-06
0.54108	3.49762e-06	0.54108	3.54797e-06	0.54108	2.93121e-06
0.54352	3.51898e-06	0.54352	3.52478e-06	0.54352	2.92969e-06
0.54596	3.53943e-06	0.54596	3.50006e-06	0.54596	2.9303e-06
0.5484	3.56079e-06	0.5484	3.47748e-06	0.5484	2.92938e-06
0.55084	3.58185e-06	0.55084	3.45856e-06	0.55084	2.9306e-06
0.55328	3.60229e-06	0.55328	3.43475e-06	0.55328	2.93182e-06
0.55573	3.62152e-06	0.55573	3.41431e-06	0.55573	2.93335e-06
0.55817	3.64258e-06	0.55817	3.39569e-06	0.55817	2.93335e-06
0.56061	3.6618e-06	0.56061	3.37311e-06	0.56061	2.93274e-06
0.56305	3.68256e-06	0.56305	3.3548e-06	0.56305	2.93427e-06
0.56549	3.70117e-06	0.56549	3.33649e-06	0.56549	2.93488e-06
0.56793	3.72162e-06	0.56793	3.31848e-06	0.56793	2.93549e-06
0.57037	3.7384e-06	0.57037	3.29956e-06	0.57037	2.93518e-06
0.57281	3.7558e-06	0.57281	3.28247e-06	0.57281	2.93549e-06
0.57526	3.7738e-06	0.57526	3.26447e-06	0.57526	2.93549e-06
0.5777	3.79242e-06	0.5777	3.25073e-06	0.5777	2.94037e-06
0.58014	3.80951e-06	0.58014	3.23303e-06	0.58014	2.93884e-06
0.58258	3.8266e-06	0.58258	3.21625e-06	0.58258	2.94403e-06
0.58502	3.84125e-06	0.58502	3.20038e-06	0.58502	2.9425e-06
0.58746	3.85864e-06	0.58746	3.18634e-06	0.58746	2.94678e-06
0.5899	3.87177e-06	0.5899	3.17078e-06	0.5899	2.948e-06
0.59235	3.8858e-06	0.59235	3.15826e-06	0.59235	2.95074e-06
0.59479	3.90167e-06	0.59479	3.14453e-06	0.59479	2.95074e-06
0.59723	3.91693e-06	0.59723	3.13141e-06	0.59723	2.95441e-06
0.59967	3.92731e-06	0.59967	3.11615e-06	0.59967	2.95624e-06
0.60211	3.94165e-06	0.60211	3.10669e-06	0.60211	2.95898e-06
0.60455	3.9502e-06	0.60455	3.09387e-06	0.60455	2.95868e-06
0.60699	3.96393e-06	0.60699	3.08105e-06	0.60699	2.96478e-06
0.60944	3.9743e-06	0.60944	3.06885e-06	0.60944	2.96692e-06
0.61188	3.98407e-06	0.61188	3.05756e-06	0.61188	2.97058e-06
0.61432	3.99109e-06	0.61432	3.04779e-06	0.61432	2.97455e-06
0.61676	4.00146e-06	0.61676	3.03711e-06	0.61676	2.97821e-06
0.6192	4.0094e-06	0.6192	3.02612e-06	0.6192	2.97882e-06
0.62164	4.01855e-06	0.62164	3.01697e-06	0.62164	2.9834e-06
0.62408	4.02344e-06	0.62408	3.00507e-06	0.62408	2.98706e-06
0.62653	4.02618e-06	0.62653	2.99744e-06	0.62653	2.99164e-06
0.62897	4.03198e-06	0.62897	2.98889e-06	0.62897	2.99408e-06
0.63141	4.03778e-06	0.63141	2.98065e-06	0.63141	2.99988e-06
0.63385	4.039e-06	0.63385	2.97302e-06	0.63385	3.00446e-06
0.63629	4.04449e-06	0.63629	2.96326e-06	0.63629	3.01086e-06
0.63873	4.04602e-06	0.63873	2.95349e-06	0.63873	3.01117e-06
0.64117	4.04785e-06	0.64117	2.94647e-06	0.64117	3.02002e-06
0.64362	4.04755e-06	0.64362	2.93793e-06	0.64362	3.02399e-06
0.64606	4.04968e-06	0.64606	2.93121e-06	0.64606	3.03314e-06
0.6485	4.0448e-06	0.6485	2.92297e-06	0.6485	3.03619e-06
0.65094	4.04327e-06	0.65094	2.91718e-06	0.65094	3.04321e-06
0.65338	4.04144e-06	0.65338	2.91138e-06	0.65338	3.0481e-06
0.65582	4.0387e-06	0.65582	2.90466e-06	0.65582	3.0542e-06
0.65826	4.0329e-06	0.65826	2.89764e-06	0.65826	3.06122e-06
0.66071	4.03198e-06	0.66071	2.89154e-06	0.66071	3.06671e-06
0.66315	4.02649e-06	0.66315	2.88544e-06	0.66315	3.07434e-06
0.66559	4.01947e-06	0.66559	2.87872e-06	0.66559	3.08014e-06
0.66803	4.01306e-06	0.66803	2.87476e-06	0.66803	3.08533e-06
0.67047	4.00879e-06	0.67047	2.87018e-06	0.67047	3.0896e-06
0.67291	4.00208e-06	0.67291	2.8653e-06	0.67291	3.09967e-06
0.67535	3.99414e-06	0.67535	2.86011e-06	0.67535	3.10608e-06
0.6778	3.98773e-06	0.6778	2.8537e-06	0.6778	3.11005e-06
0.68024	3.97919e-06	0.68024	2.85278e-06	0.68024	3.11737e-06
0.68268	3.96851e-06	0.68268	2.8476e-06	0.68268	3.12408e-06
0.68512	3.96057e-06	0.68512	2.84424e-06	0.68512	3.12927e-06
0.68756	3.95264e-06	0.68756	2.84149e-06	0.68756	3.13721e-06
0.69	3.94226e-06	0.69	2.83752e-06	0.69	3.1427e-06
0.69244	3.93402e-06	0.69244	2.83356e-06	0.69244	3.15125e-06
0.69489	3.92548e-06	0.69489	2.83112e-06	0.69489	3.16071e-06
0.69733	3.91235e-06	0.69733	2.82806e-06	0.69733	3.16803e-06
0.69977	3.90137e-06	0.69977	2.82867e-06	0.69977	3.17719e-06
0.70221	3.89252e-06	0.70221	2.82532e-06	0.70221	3.18451e-06
0.70465	3.88214e-06	0.70465	2.82501e-06	0.70465	3.19489e-06
0.70709	3.86963e-06	0.70709	2.8241e-06	0.70709	3.20251e-06
0.70953	3.86047e-06	0.70953	2.82471e-06	0.70953	3.20831e-06
0.71198	3.84949e-06	0.71198	2.82349e-06	0.71198	3.21716e-06
0.71442	3.8385e-06	0.71442	2.82227e-06	0.71442	3.22815e-06
0.71686	3.82538e-06	0.71686	2.82196e-06	0.71686	3.23456e-06
0.7193	3.81683e-06	0.7193	2.82379e-06	0.7193	3.24341e-06
0.72174	3.8031e-06	0.72174	2.82257e-06	0.72174	3.25256e-06
0.72418	3.79242e-06	0.72418	2.82349e-06	0.72418	3.26294e-06
0.72662	3.78326e-06	0.72662	2.82532e-06	0.72662	3.27148e-06
0.72906	3.77197e-06	0.72906	2.82928e-06	0.72906	3.28094e-06
0.73151	3.76068e-06	0.73151	2.82684e-06	0.73151	3.28827e-06
0.73395	3.75336e-06	0.73395	2.83295e-06	0.73395	3.302e-06
0.73639	3.74084e-06	0.73639	2.83356e-06	0.73639	3.30933e-06
0.73883	3.73138e-06	0.73883	2.836e-06	0.73883	3.32367e-06
0.74127	3.7204e-06	0.74127	2.83844e-06	0.74127	3.33435e-06
0.74371	3.71185e-06	0.74371	2.84149e-06	0.74371	3.34198e-06
0.74615	3.70056e-06	0.74615	2.84363e-06	0.74615	3.35358e-06
0.7486	3.69049e-06	0.7486	2.84668e-06	0.7486	3.36548e-06
0.75104	3.68317e-06	0.75104	2.85004e-06	0.75104	3.3786e-06
0.75348	3.67462e-06	0.75348	2.85614e-06	0.75348	3.39264e-06
0.75592	3.66425e-06	0.75592	2.8598e-06	0.75592	3.40118e-06
0.75836	3.65692e-06	0.75836	2.86652e-06	0.75836	3.41797e-06
0.7608	3.64777e-06	0.7608	2.87018e-06	0.7608	3.42926e-06
0.76324	3.63892e-06	0.76324	2.87567e-06	0.76324	3.4436e-06
0.76569	3.63281e-06	0.76569	2.87781e-06	0.76569	3.45215e-06
0.76813	3.62518e-06	0.76813	2.88635e-06	0.76813	3.46802e-06
0.77057	3.61694e-06	0.77057	2.89001e-06	0.77057	3.48022e-06
0.77301	3.61145e-06	0.77301	2.89825e-06	0.77301	3.49426e-06
0.77545	3.60321e-06	0.77545	2.90344e-06	0.77545	3.50708e-06
0.77789	3.5968e-06	0.77789	2.91138e-06	0.77789	3.52264e-06
0.78033	3.5907e-06	0.78033	2.91382e-06	0.78033	3.53577e-06
0.78278	3.5849e-06	0.78278	2.92297e-06	0.78278	3.54919e-06
0.78522	3.57727e-06	0.78522	2.9306e-06	0.78522	3.56323e-06
0.78766	3.57239e-06	0.78766	2.93732e-06	0.78766	3.57788e-06
0.7901	3.56934e-06	0.7901	2.94373e-06	0.7901	3.59131e-06
0.79254	3.56262e-06	0.79254	2.95288e-06	0.79254	3.60596e-06
0.79498	3.55713e-06	0.79498	2.95868e-06	0.79498	3.61908e-06
0.79742	3.55438e-06	0.79742	2.96875e-06	0.79742	3.63403e-06
0.79987	3.55011e-06	0.79987	2.97699e-06	0.79987	3.64777e-06
0.80231	3.54492e-06	0.80231	2.98523e-06	0.80231	3.6618e-06
0.80475	3.54126e-06	0.80475	2.995e-06	0.80475	3.67615e-06
0.80719	3.53851e-06	0.80719	3.00201e-06	0.80719	3.68988e-06
0.80963	3.53638e-06	0.80963	3.01392e-06	0.80963	3.70514e-06
0.81207	3.53424e-06	0.81207	3.02277e-06	0.81207	3.72192e-06
0.81451	3.52936e-06	0.81451	3.03223e-06	0.81451	3.7381e-06
0.81696	3.52814e-06	0.81696	3.04504e-06	0.81696	3.75519e-06
0.8194	3.52539e-06	0.8194	3.05115e-06	0.8194	3.77075e-06
0.82184	3.52325e-06	0.82184	3.06519e-06	0.82184	3.78998e-06
0.82428	3.52264e-06	0.82428	3.07404e-06	0.82428	3.80859e-06
0.82672	3.52234e-06	0.82672	3.08777e-06	0.82672	3.82599e-06
0.82916	3.52081e-06	0.82916	3.09601e-06	0.82916	3.84705e-06
0.8316	3.51898e-06	0.8316	3.11127e-06	0.8316	3.86536e-06
0.83405	3.51837e-06	0.83405	3.12286e-06	0.83405	3.88641e-06
0.83649	3.51715e-06	0.83649	3.13538e-06	0.83649	3.90839e-06
0.83893	3.51654e-06	0.83893	3.14789e-06	0.83893	3.92639e-06
0.84137	3.51624e-06	0.84137	3.16193e-06	0.84137	3.94775e-06
0.84381	3.51563e-06	0.84381	3.17505e-06	0.84381	3.96606e-06
0.84625	3.5141e-06	0.84625	3.18726e-06	0.84625	3.98712e-06
0.84869	3.5144e-06	0.84869	3.20251e-06	0.84869	4.00696e-06
0.85114	3.51318e-06	0.85114	3.21747e-06	0.85114	4.03137e-06
0.85358	3.51318e-06	0.85358	3.23151e-06	0.85358	4.0506e-06
0.85602	3.5141e-06	0.85602	3.24829e-06	0.85602	4.07471e-06
0.85846	3.51227e-06	0.85846	3.26233e-06	0.85846	4.09698e-06
0.8609	3.5144e-06	0.8609	3.2782e-06	0.8609	4.12201e-06
0.86334	3.51471e-06	0.86334	3.29376e-06	0.86334	4.14581e-06
0.86578	3.51349e-06	0.86578	3.31024e-06	0.86578	4.16992e-06
0.86823	3.51593e-06	0.86823	3.32733e-06	0.86823	4.19586e-06
0.87067	3.51501e-06	0.87067	3.34686e-06	0.87067	4.22363e-06
0.87311	3.51471e-06	0.87311	3.36151e-06	0.87311	4.24622e-06
0.87555	3.51624e-06	0.87555	3.38196e-06	0.87555	4.27612e-06
0.87799	3.51746e-06	0.87799	3.39966e-06	0.87799	4.30267e-06
0.88043	3.5202e-06	0.88043	3.41858e-06	0.88043	4.33136e-06
0.88287	3.51898e-06	0.88287	3.43628e-06	0.88287	4.35974e-06
0.88531	3.52081e-06	0.88531	3.45703e-06	0.88531	4.39056e-06
0.88776	3.52051e-06	0.88776	3.47565e-06	0.88776	4.42322e-06
0.8902	3.52386e-06	0.8902	3.49579e-06	0.8902	4.45465e-06
0.89264	3.52356e-06	0.89264	3.51593e-06	0.89264	4.48517e-06
0.89508	3.526e-06	0.89508	3.53882e-06	0.89508	4.51569e-06
0.89752	3.52783e-06	0.89752	3.55835e-06	0.89752	4.54895e-06
0.89996	3.52936e-06	0.89996	3.57941e-06	0.89996	4.58008e-06
0.9024	3.5318e-06	0.9024	3.60168e-06	0.9024	4.61151e-06
0.90485	3.53333e-06	0.90485	3.62427e-06	0.90485	4.64661e-06
0.90729	3.53638e-06	0.90729	3.64746e-06	0.90729	4.67957e-06
0.90973	3.53973e-06	0.90973	3.67126e-06	0.90973	4.71649e-06
0.91217	3.54187e-06	0.91217	3.69232e-06	0.91217	4.74823e-06
0.91461	3.54584e-06	0.91461	3.71979e-06	0.91461	4.7876e-06
0.91705	3.54797e-06	0.91705	3.74146e-06	0.91705	4.81873e-06
0.91949	3.55042e-06	0.91949	3.76526e-06	0.91949	4.8587e-06
0.92194	3.55133e-06	0.92194	3.78967e-06	0.92194	4.89136e-06
0.92438	3.55743e-06	0.92438	3.81622e-06	0.92438	4.9295e-06
0.92682	3.56079e-06	0.92682	3.84247e-06	0.92682	4.96735e-06
0.92926	3.56415e-06	0.92926	3.86993e-06	0.92926	5.00824e-06
0.9317	3.56781e-06	0.9317	3.89435e-06	0.9317	5.047e-06
0.93414	3.57391e-06	0.93414	3.92334e-06	0.93414	5.08759e-06
0.93658	3.57574e-06	0.93658	3.9505e-06	0.93658	5.12665e-06
0.93903	3.58154e-06	0.93903	3.97888e-06	0.93903	5.16846e-06
0.94147	3.58337e-06	0.94147	4.00787e-06	0.94147	5.2124e-06
0.94391	3.58765e-06	0.94391	4.03564e-06	0.94391	5.25574e-06
0.94635	3.59467e-06	0.94635	4.06372e-06	0.94635	5.30304e-06
0.94879	3.59833e-06	0.94879	4.09241e-06	0.94879	5.34912e-06
0.95123	3.60291e-06	0.95123	4.12201e-06	0.95123	5.39124e-06
0.95367	3.60809e-06	0.95367	4.15558e-06	0.95367	5.44159e-06
0.95612	3.61328e-06	0.95612	4.18488e-06	0.95612	5.49133e-06
0.95856	3.62e-06	0.95856	4.2157e-06	0.95856	5.5423e-06
0.961	3.62335e-06	0.961	4.24561e-06	0.961	5.58868e-06
0.96344	3.63007e-06	0.96344	4.28223e-06	0.96344	5.63843e-06
0.96588	3.63739e-06	0.96588	4.31244e-06	0.96588	5.69e-06
0.96832	3.64166e-06	0.96832	4.34692e-06	0.96832	5.7428e-06
0.97076	3.64716e-06	0.97076	4.37653e-06	0.97076	5.79315e-06
0.97321	3.65479e-06	0.97321	4.41162e-06	0.97321	5.85236e-06
0.97565	3.66089e-06	0.97565	4.44092e-06	0.97565	5.90515e-06
0.97809	3.66608e-06	0.97809	4.47906e-06	0.97809	5.95795e-06
0.98053	3.67279e-06	0.98053	4.51385e-06	0.98053	6.01959e-06
0.98297	3.68073e-06	0.98297	4.55078e-06	0.98297	6.08521e-06
0.98541	3.68774e-06	0.98541	4.5874e-06	0.98541	6.14929e-06
0.98785	3.69568e-06	0.98785	4.6225e-06	0.98785	6.22253e-06
0.9903	3.70056e-06	0.9903	4.65851e-06	0.9903	6.28662e-06
0.99274	3.7088e-06	0.99274	4.69788e-06	0.99274	6.35986e-06
0.99518	3.71521e-06	0.99518	4.73297e-06	0.99518	6.42395e-06
0.99762	3.72406e-06	0.99762	4.77295e-06	0.99762	6.49719e-06
1.00006	3.73047e-06	1.00006	4.81049e-06	1.00006	6.56433e-06
1.0025	3.73627e-06	1.0025	4.84863e-06	1.0025	6.63757e-06
1.00494	3.74603e-06	1.00494	4.8877e-06	1.00494	6.71082e-06
1.00739	3.75366e-06	1.00739	4.92798e-06	1.00739	6.78711e-06
1.00983	3.76312e-06	1.00983	4.96674e-06	1.00983	6.8573e-06
1.01227	3.77075e-06	1.01227	5.00824e-06	1.01227	6.93665e-06
1.01471	3.77899e-06	1.01471	5.05035e-06	1.01471	7.00989e-06
1.01715	3.78845e-06	1.01715	5.08972e-06	1.01715	7.09229e-06
1.01959	3.79578e-06	1.01959	5.13092e-06	1.01959	7.17163e-06
1.02203	3.80493e-06	1.02203	5.17395e-06	1.02203	7.25403e-06
1.02448	3.81348e-06	1.02448	5.21667e-06	1.02448	7.33643e-06
1.02692	3.82355e-06	1.02692	5.2597e-06	1.02692	7.42798e-06
1.02936	3.83057e-06	1.02936	5.30151e-06	1.02936	7.51038e-06
1.0318	3.84369e-06	1.0318	5.34729e-06	1.0318	7.60193e-06
1.03424	3.85223e-06	1.03424	5.38818e-06	1.03424	7.68738e-06
1.03668	3.86261e-06	1.03668	5.43518e-06	1.03668	7.78198e-06
1.03912	3.87085e-06	1.03912	5.4776e-06	1.03912	7.87354e-06
1.04156	3.88184e-06	1.04156	5.52399e-06	1.04156	7.96509e-06
1.04401	3.89282e-06	1.04401	5.56885e-06	1.04401	8.06274e-06
1.04645	3.90503e-06	1.04645	5.61676e-06	1.04645	8.16345e-06
1.04889	3.91296e-06	1.04889	5.6601e-06	1.04889	8.25806e-06
1.05133	3.92456e-06	1.05133	5.70801e-06	1.05133	8.36487e-06
1.05377	3.93463e-06	1.05377	5.75439e-06	1.05377	8.46252e-06
1.05621	3.94745e-06	1.05621	5.80109e-06	1.05621	8.56628e-06
1.05865	3.95782e-06	1.05865	5.84717e-06	1.05865	8.6731e-06
1.0611	3.96759e-06	1.0611	5.89508e-06	1.0611	8.78296e-06
1.06354	3.97949e-06	1.06354	5.94452e-06	1.06354	8.88977e-06
1.06598	3.99353e-06	1.06598	5.99152e-06	1.06598	9.00574e-06
1.06842	4.00238e-06	1.06842	6.03882e-06	1.06842	9.11865e-06
1.07086	4.0152e-06	1.07086	6.09131e-06	1.07086	9.23462e-06
1.0733	4.0271e-06	1.0733	6.14014e-06	1.0733	9.34753e-06
1.07574	4.0387e-06	1.07574	6.19202e-06	1.07574	9.4696e-06
1.07819	4.05212e-06	1.07819	6.23779e-06	1.07819	9.58557e-06
1.08063	4.06281e-06	1.08063	6.28967e-06	1.08063	9.70459e-06
1.08307	4.07684e-06	1.08307	6.3385e-06	1.08307	9.82971e-06
1.08551	4.08875e-06	1.08551	6.39343e-06	1.08551	9.95483e-06
1.08795	4.104e-06	1.08795	6.44226e-06	1.08795	1.008e-05
1.09039	4.11621e-06	1.09039	6.49719e-06	1.09039	1.02081e-05
1.09283	4.1272e-06	1.09283	6.54297e-06	1.09283	1.03333e-05
1.09528	4.14368e-06	1.09528	6.5979e-06	1.09528	1.04645e-05
1.09772	4.1568e-06	1.09772	6.64673e-06	1.09772	1.05957e-05
1.10016	4.16962e-06	1.10016	6.70166e-06	1.10016	1.07269e-05
1.1026	4.18457e-06	1.1026	6.75659e-06	1.1026	1.08612e-05
1.10504	4.19922e-06	1.10504	6.80847e-06	1.10504	1.10016e-05
1.10748	4.21173e-06	1.10748	6.8573e-06	1.10748	1.11359e-05
1.10992	4.22607e-06	1.10992	6.91528e-06	1.10992	1.12762e-05
1.11237	4.24103e-06	1.11237	6.96716e-06	1.11237	1.14105e-05
1.11481	4.25659e-06	1.11481	7.02209e-06	1.11481	1.1557e-05
1.11725	4.27063e-06	1.11725	7.07703e-06	1.11725	1.16943e-05
1.11969	4.28436e-06	1.11969	7.12891e-06	1.11969	1.18378e-05
1.12213	4.29901e-06	1.12213	7.18384e-06	1.12213	1.19843e-05
1.12457	4.31763e-06	1.12457	7.24182e-06	1.12457	1.21338e-05
1.12701	4.33228e-06	1.12701	7.29675e-06	1.12701	1.22803e-05
1.12946	4.34631e-06	1.12946	7.35474e-06	1.12946	1.24268e-05
1.1319	4.36462e-06	1.1319	7.40967e-06	1.1319	1.25732e-05
1.13434	4.3811e-06	1.13434	7.4646e-06	1.13434	1.27289e-05
1.13678	4.39606e-06	1.13678	7.52258e-06	1.13678	1.28754e-05
1.13922	4.41315e-06	1.13922	7.57751e-06	1.13922	1.3031e-05
1.14166	4.43237e-06	1.14166	7.63855e-06	1.14166	1.31805e-05
1.1441	4.44855e-06	1.1441	7.69348e-06	1.1441	1.33362e-05
1.14655	4.46747e-06	1.14655	7.75146e-06	1.14655	1.34888e-05
1.14899	4.48608e-06	1.14899	7.8125e-06	1.14899	1.36444e-05
1.15143	4.50317e-06	1.15143	7.87048e-06	1.15143	1.38e-05
1.15387	4.52454e-06	1.15387	7.93152e-06	1.15387	1.39618e-05
1.15631	4.54102e-06	1.15631	7.98645e-06	1.15631	1.41144e-05
1.15875	4.56177e-06	1.15875	8.04749e-06	1.15875	1.42761e-05
1.16119	4.58008e-06	1.16119	8.10547e-06	1.16119	1.44318e-05
1.16364	4.59961e-06	1.16364	8.16956e-06	1.16364	1.45935e-05
1.16608	4.62158e-06	1.16608	8.22754e-06	1.16608	1.47491e-05
1.16852	4.64203e-06	1.16852	8.28857e-06	1.16852	1.4917e-05
1.17096	4.66492e-06	1.17096	8.34961e-06	1.17096	1.50726e-05
1.1734	4.68384e-06	1.1734	8.4137e-06	1.1734	1.52374e-05
1.17584	4.7049e-06	1.17584	8.47473e-06	1.17584	1.53992e-05
1.17828	4.72931e-06	1.17828	8.53577e-06	1.17828	1.5564e-05
1.18073	4.75311e-06	1.18073	8.5968e-06	1.18073	1.57318e-05
1.18317	4.77661e-06	1.18317	8.66394e-06	1.18317	1.59027e-05
1.18561	4.7998e-06	1.18561	8.72498e-06	1.18561	1.60645e-05
1.18805	4.82605e-06	1.18805	8.79211e-06	1.18805	1.62384e-05
1.19049	4.84741e-06	1.19049	8.85315e-06	1.19049	1.64001e-05
1.19293	4.87366e-06	1.19293	8.92334e-06	1.19293	1.6571e-05
1.19537	4.89868e-06	1.19537	8.98743e-06	1.19537	1.67358e-05
1.19781	4.92645e-06	1.19781	9.05457e-06	1.19781	1.69067e-05
1.20026	4.95056e-06	1.20026	9.11865e-06	1.20026	1.70776e-05
1.2027	4.97711e-06	1.2027	9.18884e-06	1.2027	1.72516e-05
1.20514	5.00244e-06	1.20514	9.25598e-06	1.20514	1.74194e-05
1.20758	5.03296e-06	1.20758	9.32617e-06	1.20758	1.75995e-05
1.21002	5.05798e-06	1.21002	9.39331e-06	1.21002	1.77673e-05
1.21246	5.08453e-06	1.21246	9.46655e-06	1.21246	1.79413e-05
1.2149	5.1123e-06	1.2149	9.53674e-06	1.2149	1.81152e-05
1.21735	5.14038e-06	1.21735	9.60693e-06	1.21735	1.82892e-05
1.21979	5.16754e-06	1.21979	9.67712e-06	1.21979	1.84692e-05
1.22223	5.19806e-06	1.22223	9.75342e-06	1.22223	1.86523e-05
1.22467	5.22369e-06	1.22467	9.82056e-06	1.22467	1.88263e-05
1.22711	5.25574e-06	1.22711	9.8999e-06	1.22711	1.90094e-05
1.22955	5.2829e-06	1.22955	9.97009e-06	1.22955	1.91895e-05
1.23199	5.31433e-06	1.23199	1.00464e-05	1.23199	1.93726e-05
1.23444	5.3418e-06	1.23444	1.01196e-05	1.23444	1.95526e-05
1.23688	5.3714e-06	1.23688	1.01959e-05	1.23688	1.97357e-05
1.23932	5.40314e-06	1.23932	1.02692e-05	1.23932	1.99158e-05
1.24176	5.43396e-06	1.24176	1.03516e-05	1.24176	2.0108e-05
1.2442	5.46631e-06	1.2442	1.04248e-05	1.2442	2.02911e-05
1.24664	5.49866e-06	1.24664	1.05072e-05	1.24664	2.04803e-05
1.24908	5.52795e-06	1.24908	1.05835e-05	1.24908	2.06635e-05
1.25153	5.56152e-06	1.25153	1.06628e-05	1.25153	2.08496e-05
1.25397	5.59265e-06	1.25397	1.07422e-05	1.25397	2.10358e-05
1.25641	5.62744e-06	1.25641	1.08215e-05	1.25641	2.1225e-05
1.25885	5.66162e-06	1.25885	1.091e-05	1.25885	2.14172e-05
1.26129	5.69824e-06	1.26129	1.09924e-05	1.26129	2.16156e-05
1.26373	5.73029e-06	1.26373	1.10718e-05	1.26373	2.18018e-05
1.26617	5.76813e-06	1.26617	1.11603e-05	1.26617	2.20032e-05
1.26862	5.80078e-06	1.26862	1.12427e-05	1.26862	2.21924e-05
1.27106	5.83923e-06	1.27106	1.13312e-05	1.27106	2.23907e-05
1.2735	5.87494e-06	1.2735	1.14166e-05	1.2735	2.2583e-05
1.27594	5.91156e-06	1.27594	1.1499e-05	1.27594	2.27814e-05
1.27838	5.94879e-06	1.27838	1.15906e-05	1.27838	2.29797e-05
1.28082	5.98663e-06	1.28082	1.16821e-05	1.28082	2.31873e-05
1.28326	6.026e-06	1.28326	1.17706e-05	1.28326	2.33765e-05
1.28571	6.06995e-06	1.28571	1.18652e-05	1.28571	2.35901e-05
1.28815	6.10657e-06	1.28815	1.19507e-05	1.28815	2.37854e-05
1.29059	6.14624e-06	1.29059	1.20453e-05	1.29059	2.39899e-05
1.29303	6.18591e-06	1.29303	1.21399e-05	1.29303	2.41882e-05
1.29547	6.22864e-06	1.29547	1.22345e-05	1.29547	2.43988e-05
1.29791	6.27136e-06	1.29791	1.23291e-05	1.29791	2.46124e-05
1.30035	6.31409e-06	1.30035	1.24298e-05	1.30035	2.4826e-05
1.3028	6.35376e-06	1.3028	1.25275e-05	1.3028	2.50336e-05
1.30524	6.39954e-06	1.30524	1.26251e-05	1.30524	2.52533e-05
1.30768	6.44226e-06	1.30768	1.27228e-05	1.30768	2.54608e-05
1.31012	6.48804e-06	1.31012	1.28296e-05	1.31012	2.56836e-05
1.31256	6.53076e-06	1.31256	1.29272e-05	1.31256	2.58911e-05
1.315	6.57654e-06	1.315	1.3028e-05	1.315	2.61047e-05
1.31744	6.61926e-06	1.31744	1.31348e-05	1.31744	2.63214e-05
1.31989	6.66809e-06	1.31989	1.32416e-05	1.31989	2.65411e-05
1.32233	6.71387e-06	1.32233	1.33484e-05	1.32233	2.67517e-05
1.32477	6.7627e-06	1.32477	1.34521e-05	1.32477	2.69775e-05
1.32721	6.80847e-06	1.32721	1.3559e-05	1.32721	2.71912e-05
1.32965	6.8573e-06	1.32965	1.36719e-05	1.32965	2.742e-05
1.33209	6.90308e-06	1.33209	1.37817e-05	1.33209	2.76398e-05
1.33453	6.9519e-06	1.33453	1.38947e-05	1.33453	2.78595e-05
1.33698	7.00378e-06	1.33698	1.40076e-05	1.33698	2.80853e-05
1.33942	7.05566e-06	1.33942	1.41235e-05	1.33942	2.83173e-05
1.34186	7.10449e-06	1.34186	1.42365e-05	1.34186	2.85339e-05
1.3443	7.15637e-06	1.3443	1.43555e-05	1.3443	2.87689e-05
1.34674	7.20825e-06	1.34674	1.44684e-05	1.34674	2.89886e-05
1.34918	7.26013e-06	1.34918	1.45935e-05	1.34918	2.92236e-05
1.35162	7.31201e-06	1.35162	1.47064e-05	1.35162	2.94525e-05
1.35406	7.36694e-06	1.35406	1.48285e-05	1.35406	2.96783e-05
1.35651	7.42188e-06	1.35651	1.49475e-05	1.35651	2.99133e-05
1.35895	7.47681e-06	1.35895	1.50726e-05	1.35895	3.01514e-05
1.36139	7.52869e-06	1.36139	1.51947e-05	1.36139	3.03741e-05
1.36383	7.58972e-06	1.36383	1.53229e-05	1.36383	3.06152e-05
1.36627	7.64465e-06	1.36627	1.54449e-05	1.36627	3.08411e-05
1.36871	7.69958e-06	1.36871	1.55731e-05	1.36871	3.1076e-05
1.37115	7.75757e-06	1.37115	1.57013e-05	1.37115	3.13019e-05
1.3736	7.81555e-06	1.3736	1.58295e-05	1.3736	3.15369e-05
1.37604	7.87354e-06	1.37604	1.59576e-05	1.37604	3.17719e-05
1.37848	7.93762e-06	1.37848	1.6095e-05	1.37848	3.2016e-05
1.38092	7.99255e-06	1.38092	1.62231e-05	1.38092	3.22449e-05
1.38336	8.05969e-06	1.38336	1.63605e-05	1.38336	3.2489e-05
1.3858	8.11768e-06	1.3858	1.64886e-05	1.3858	3.27148e-05
1.38824	8.18176e-06	1.38824	1.6629e-05	1.38824	3.2962e-05
1.39069	8.24585e-06	1.39069	1.67603e-05	1.39069	3.3194e-05
1.39313	8.30688e-06	1.39313	1.68976e-05	1.39313	3.34351e-05
1.39557	8.37097e-06	1.39557	1.7038e-05	1.39557	3.36731e-05
1.39801	8.43811e-06	1.39801	1.71783e-05	1.39801	3.39203e-05
1.40045	8.5022e-06	1.40045	1.73187e-05	1.40045	3.41522e-05
1.40289	8.57239e-06	1.40289	1.74622e-05	1.40289	3.44055e-05
1.40533	8.63647e-06	1.40533	1.76025e-05	1.40533	3.46405e-05
1.40778	8.70361e-06	1.40778	1.77429e-05	1.40778	3.48877e-05
1.41022	8.77075e-06	1.41022	1.78894e-05	1.41022	3.51288e-05
1.41266	8.84094e-06	1.41266	1.80359e-05	1.41266	3.53699e-05
1.4151	8.90808e-06	1.4151	1.81793e-05	1.4151	3.56171e-05
1.41754	8.98438e-06	1.41754	1.83319e-05	1.41754	3.58673e-05
1.41998	9.05151e-06	1.41998	1.84784e-05	1.41998	3.61053e-05
1.42242	9.12781e-06	1.42242	1.8634e-05	1.42242	3.63586e-05
1.42487	9.19495e-06	1.42487	1.87775e-05	1.42487	3.65936e-05
1.42731	9.27429e-06	1.42731	1.89331e-05	1.42731	3.6853e-05
1.42975	9.34448e-06	1.42975	1.90826e-05	1.42975	3.70911e-05
1.43219	9.42078e-06	1.43219	1.92352e-05	1.43219	3.73383e-05
1.43463	9.49402e-06	1.43463	1.93909e-05	1.43463	3.75885e-05
1.43707	9.57336e-06	1.43707	1.95526e-05	1.43707	3.78448e-05
1.43951	9.64966e-06	1.43951	1.97021e-05	1.43951	3.80798e-05
1.44196	9.72595e-06	1.44196	1.98669e-05	1.44196	3.83392e-05
1.4444	9.8053e-06	1.4444	2.00165e-05	1.4444	3.85803e-05
1.44684	9.88464e-06	1.44684	2.01782e-05	1.44684	3.88336e-05
1.44928	9.96399e-06	1.44928	2.03369e-05	1.44928	3.90808e-05
1.45172	1.00433e-05	1.45172	2.04987e-05	1.45172	3.9325e-05
1.45416	1.01257e-05	1.45416	2.06604e-05	1.45416	3.95752e-05
1.4566	1.02112e-05	1.4566	2.08282e-05	1.4566	3.98315e-05
1.45905	1.02905e-05	1.45905	2.09869e-05	1.45905	4.00726e-05
1.46149	1.03729e-05	1.46149	2.11578e-05	1.46149	4.0329e-05
1.46393	1.04553e-05	1.46393	2.13135e-05	1.46393	4.05762e-05
1.46637	1.05408e-05	1.46637	2.14844e-05	1.46637	4.08325e-05
1.46881	1.06232e-05	1.46881	2.16492e-05	1.46881	4.10767e-05
1.47125	1.07117e-05	1.47125	2.1817e-05	1.47125	4.133e-05
1.47369	1.07971e-05	1.47369	2.19879e-05	1.47369	4.15833e-05
1.47614	1.08856e-05	1.47614	2.21588e-05	1.47614	4.18457e-05
1.47858	1.09711e-05	1.47858	2.23297e-05	1.47858	4.20868e-05
1.48102	1.10626e-05	1.48102	2.25037e-05	1.48102	4.23523e-05
1.48346	1.11481e-05	1.48346	2.26715e-05	1.48346	4.26056e-05
1.4859	1.12366e-05	1.4859	2.28485e-05	1.4859	4.28619e-05
1.48834	1.13251e-05	1.48834	2.30164e-05	1.48834	4.31061e-05
1.49078	1.14136e-05	1.49078	2.31964e-05	1.49078	4.33655e-05
1.49323	1.15051e-05	1.49323	2.33704e-05	1.49323	4.36249e-05
1.49567	1.15997e-05	1.49567	2.35504e-05	1.49567	4.38873e-05
1.49811	1.16852e-05	1.49811	2.37244e-05	1.49811	4.41345e-05
1.50055	1.17798e-05	1.50055	2.39075e-05	1.50055	4.44061e-05

## Sheet: Figure S8(c)
-1.4975	-9.99969e-06	-1.4975	-3.31787e-05	-1.4975	-3.56567e-05
-1.49506	-1.56219e-05	-1.49506	-2.87354e-05	-1.49506	-3.18329e-05
-1.49261	-1.38458e-05	-1.49261	-2.59491e-05	-1.49261	-2.95807e-05
-1.49017	-1.26129e-05	-1.49017	-2.39624e-05	-1.49017	-2.78961e-05
-1.48773	-1.16821e-05	-1.48773	-2.24731e-05	-1.48773	-2.66418e-05
-1.48529	-1.09467e-05	-1.48529	-2.12494e-05	-1.48529	-2.54944e-05
-1.48285	-1.03424e-05	-1.48285	-2.02301e-05	-1.48285	-2.4646e-05
-1.48041	-9.82971e-06	-1.48041	-1.93878e-05	-1.48041	-2.39594e-05
-1.47797	-9.38721e-06	-1.47797	-1.86737e-05	-1.47797	-2.33093e-05
-1.47552	-8.99658e-06	-1.47552	-1.80206e-05	-1.47552	-2.26959e-05
-1.47308	-8.64563e-06	-1.47308	-1.74164e-05	-1.47308	-2.21344e-05
-1.47064	-8.3374e-06	-1.47064	-1.68488e-05	-1.47064	-2.16919e-05
-1.4682	-8.05054e-06	-1.4682	-1.63788e-05	-1.4682	-2.12402e-05
-1.46576	-7.79114e-06	-1.46576	-1.59454e-05	-1.46576	-2.08191e-05
-1.46332	-7.55005e-06	-1.46332	-1.55334e-05	-1.46332	-2.04987e-05
-1.46088	-7.32727e-06	-1.46088	-1.51459e-05	-1.46088	-2.01569e-05
-1.45844	-7.11975e-06	-1.45844	-1.48163e-05	-1.45844	-1.98364e-05
-1.45599	-6.92749e-06	-1.45599	-1.44226e-05	-1.45599	-1.95801e-05
-1.45355	-6.74438e-06	-1.45355	-1.41174e-05	-1.45355	-1.92535e-05
-1.45111	-6.57349e-06	-1.45111	-1.3797e-05	-1.45111	-1.90369e-05
-1.44867	-6.41174e-06	-1.44867	-1.35406e-05	-1.44867	-1.87164e-05
-1.44623	-6.25916e-06	-1.44623	-1.33026e-05	-1.44623	-1.84753e-05
-1.44379	-6.11267e-06	-1.44379	-1.30554e-05	-1.44379	-1.82098e-05
-1.44135	-5.97534e-06	-1.44135	-1.2793e-05	-1.44135	-1.80359e-05
-1.4389	-5.84412e-06	-1.4389	-1.25702e-05	-1.4389	-1.7868e-05
-1.43646	-5.71594e-06	-1.43646	-1.24054e-05	-1.43646	-1.76697e-05
-1.43402	-5.59387e-06	-1.43402	-1.22345e-05	-1.43402	-1.75781e-05
-1.43158	-5.47791e-06	-1.43158	-1.20331e-05	-1.43158	-1.74133e-05
-1.42914	-5.36804e-06	-1.42914	-1.18347e-05	-1.42914	-1.72302e-05
-1.4267	-5.26123e-06	-1.4267	-1.16516e-05	-1.4267	-1.71234e-05
-1.42426	-5.15747e-06	-1.42426	-1.15265e-05	-1.42426	-1.6922e-05
-1.42181	-5.05981e-06	-1.42181	-1.13983e-05	-1.42181	-1.68335e-05
-1.41937	-4.96521e-06	-1.41937	-1.12244e-05	-1.41937	-1.6748e-05
-1.41693	-4.87061e-06	-1.41693	-1.10779e-05	-1.41693	-1.66077e-05
-1.41449	-4.7821e-06	-1.41449	-1.09436e-05	-1.41449	-1.65253e-05
-1.41205	-4.6936e-06	-1.41205	-1.08093e-05	-1.41205	-1.64215e-05
-1.40961	-4.60815e-06	-1.40961	-1.06842e-05	-1.40961	-1.63391e-05
-1.40717	-4.53125e-06	-1.40717	-1.05774e-05	-1.40717	-1.62659e-05
-1.40472	-4.4519e-06	-1.40472	-1.04645e-05	-1.40472	-1.61713e-05
-1.40228	-4.37561e-06	-1.40228	-1.03394e-05	-1.40228	-1.60187e-05
-1.39984	-4.30176e-06	-1.39984	-1.01746e-05	-1.39984	-1.59058e-05
-1.3974	-4.22852e-06	-1.3974	-1.01013e-05	-1.3974	-1.58295e-05
-1.39496	-4.15833e-06	-1.39496	-1.00342e-05	-1.39496	-1.56952e-05
-1.39252	-4.08936e-06	-1.39252	-9.95178e-06	-1.39252	-1.55884e-05
-1.39008	-4.02252e-06	-1.39008	-9.84192e-06	-1.39008	-1.54419e-05
-1.38763	-3.95966e-06	-1.38763	-9.70764e-06	-1.38763	-1.53442e-05
-1.38519	-3.89465e-06	-1.38519	-9.61609e-06	-1.38519	-1.51917e-05
-1.38275	-3.83453e-06	-1.38275	-9.53674e-06	-1.38275	-1.50757e-05
-1.38031	-3.77319e-06	-1.38031	-9.4574e-06	-1.38031	-1.49872e-05
-1.37787	-3.7149e-06	-1.37787	-9.35059e-06	-1.37787	-1.48804e-05
-1.37543	-3.65753e-06	-1.37543	-9.27734e-06	-1.37543	-1.47888e-05
-1.37299	-3.60107e-06	-1.37299	-9.17969e-06	-1.37299	-1.46515e-05
-1.37054	-3.54736e-06	-1.37054	-9.08203e-06	-1.37054	-1.4566e-05
-1.3681	-3.49426e-06	-1.3681	-9.01184e-06	-1.3681	-1.44714e-05
-1.36566	-3.44116e-06	-1.36566	-8.92944e-06	-1.36566	-1.43677e-05
-1.36322	-3.39142e-06	-1.36322	-8.84705e-06	-1.36322	-1.4328e-05
-1.36078	-3.34198e-06	-1.36078	-8.74634e-06	-1.36078	-1.42548e-05
-1.35834	-3.29285e-06	-1.35834	-8.6731e-06	-1.35834	-1.41907e-05
-1.3559	-3.24554e-06	-1.3559	-8.60596e-06	-1.3559	-1.40869e-05
-1.35345	-3.19824e-06	-1.35345	-8.56934e-06	-1.35345	-1.40533e-05
-1.35101	-3.15247e-06	-1.35101	-8.50525e-06	-1.35101	-1.39679e-05
-1.34857	-3.10852e-06	-1.34857	-8.48694e-06	-1.34857	-1.39191e-05
-1.34613	-3.06427e-06	-1.34613	-8.38928e-06	-1.34613	-1.38458e-05
-1.34369	-3.02307e-06	-1.34369	-8.32825e-06	-1.34369	-1.37756e-05
-1.34125	-2.97974e-06	-1.34125	-8.25806e-06	-1.34125	-1.37054e-05
-1.33881	-2.93945e-06	-1.33881	-8.18787e-06	-1.33881	-1.36658e-05
-1.33636	-2.89825e-06	-1.33636	-8.15735e-06	-1.33636	-1.35651e-05
-1.33392	-2.8598e-06	-1.33392	-8.08411e-06	-1.33392	-1.34552e-05
-1.33148	-2.82013e-06	-1.33148	-8.00476e-06	-1.33148	-1.33545e-05
-1.32904	-2.78503e-06	-1.32904	-7.95898e-06	-1.32904	-1.33087e-05
-1.3266	-2.74628e-06	-1.3266	-7.92542e-06	-1.3266	-1.32202e-05
-1.32416	-2.71179e-06	-1.32416	-7.89185e-06	-1.32416	-1.31653e-05
-1.32172	-2.67517e-06	-1.32172	-7.82166e-06	-1.32172	-1.30829e-05
-1.31927	-2.64008e-06	-1.31927	-7.75757e-06	-1.31927	-1.30585e-05
-1.31683	-2.6059e-06	-1.31683	-7.69958e-06	-1.31683	-1.29822e-05
-1.31439	-2.57324e-06	-1.31439	-7.66907e-06	-1.31439	-1.29303e-05
-1.31195	-2.54028e-06	-1.31195	-7.65686e-06	-1.31195	-1.28967e-05
-1.30951	-2.50854e-06	-1.30951	-7.61108e-06	-1.30951	-1.28204e-05
-1.30707	-2.47528e-06	-1.30707	-7.58057e-06	-1.30707	-1.27808e-05
-1.30463	-2.44507e-06	-1.30463	-7.52563e-06	-1.30463	-1.2674e-05
-1.30219	-2.41577e-06	-1.30219	-7.44324e-06	-1.30219	-1.26038e-05
-1.29974	-2.38495e-06	-1.29974	-7.42188e-06	-1.29974	-1.25e-05
-1.2973	-2.35535e-06	-1.2973	-7.31506e-06	-1.2973	-1.24573e-05
-1.29486	-2.32605e-06	-1.29486	-7.2876e-06	-1.29486	-1.2384e-05
-1.29242	-2.29736e-06	-1.29242	-7.25403e-06	-1.29242	-1.23444e-05
-1.28998	-2.27081e-06	-1.28998	-7.2052e-06	-1.28998	-1.22498e-05
-1.28754	-2.24304e-06	-1.28754	-7.20825e-06	-1.28754	-1.21796e-05
-1.2851	-2.21588e-06	-1.2851	-7.13806e-06	-1.2851	-1.21338e-05
-1.28265	-2.18994e-06	-1.28265	-7.09534e-06	-1.28265	-1.21277e-05
-1.28021	-2.164e-06	-1.28021	-7.05566e-06	-1.28021	-1.20758e-05
-1.27777	-2.13806e-06	-1.27777	-7.0343e-06	-1.27777	-1.20148e-05
-1.27533	-2.11365e-06	-1.27533	-7.00378e-06	-1.27533	-1.19446e-05
-1.27289	-2.08893e-06	-1.27289	-6.95496e-06	-1.27289	-1.19141e-05
-1.27045	-2.0636e-06	-1.27045	-6.94885e-06	-1.27045	-1.18591e-05
-1.26801	-2.03979e-06	-1.26801	-6.89087e-06	-1.26801	-1.17828e-05
-1.26556	-2.01782e-06	-1.26556	-6.86035e-06	-1.26556	-1.17584e-05
-1.26312	-1.9928e-06	-1.26312	-6.83289e-06	-1.26312	-1.16577e-05
-1.26068	-1.96991e-06	-1.26068	-6.79932e-06	-1.26068	-1.16333e-05
-1.25824	-1.94763e-06	-1.25824	-6.7749e-06	-1.25824	-1.15692e-05
-1.2558	-1.92535e-06	-1.2558	-6.71387e-06	-1.2558	-1.15417e-05
-1.25336	-1.9046e-06	-1.25336	-6.70166e-06	-1.25336	-1.14685e-05
-1.25092	-1.88263e-06	-1.25092	-6.67114e-06	-1.25092	-1.14288e-05
-1.24847	-1.86127e-06	-1.24847	-6.63147e-06	-1.24847	-1.13647e-05
-1.24603	-1.8396e-06	-1.24603	-6.5918e-06	-1.24603	-1.13312e-05
-1.24359	-1.82037e-06	-1.24359	-6.55518e-06	-1.24359	-1.12183e-05
-1.24115	-1.7984e-06	-1.24115	-6.55823e-06	-1.24115	-1.12152e-05
-1.23871	-1.77887e-06	-1.23871	-6.5094e-06	-1.23871	-1.11511e-05
-1.23627	-1.75964e-06	-1.23627	-6.47583e-06	-1.23627	-1.11298e-05
-1.23383	-1.73981e-06	-1.23383	-6.46362e-06	-1.23383	-1.10809e-05
-1.23138	-1.72058e-06	-1.23138	-6.44531e-06	-1.23138	-1.10107e-05
-1.22894	-1.70227e-06	-1.22894	-6.39954e-06	-1.22894	-1.09955e-05
-1.2265	-1.68488e-06	-1.2265	-6.37817e-06	-1.2265	-1.09558e-05
-1.22406	-1.66473e-06	-1.22406	-6.32019e-06	-1.22406	-1.09833e-05
-1.22162	-1.64703e-06	-1.22162	-6.31714e-06	-1.22162	-1.09192e-05
-1.21918	-1.62872e-06	-1.21918	-6.27441e-06	-1.21918	-1.08429e-05
-1.21674	-1.61133e-06	-1.21674	-6.24695e-06	-1.21674	-1.08276e-05
-1.21429	-1.59454e-06	-1.21429	-6.23169e-06	-1.21429	-1.08032e-05
-1.21185	-1.57745e-06	-1.21185	-6.19507e-06	-1.21185	-1.07391e-05
-1.20941	-1.55884e-06	-1.20941	-6.17065e-06	-1.20941	-1.06781e-05
-1.20697	-1.54358e-06	-1.20697	-6.1554e-06	-1.20697	-1.05988e-05
-1.20453	-1.5271e-06	-1.20453	-6.11877e-06	-1.20453	-1.05438e-05
-1.20209	-1.51093e-06	-1.20209	-6.08215e-06	-1.20209	-1.05164e-05
-1.19965	-1.49353e-06	-1.19965	-6.06384e-06	-1.19965	-1.0498e-05
-1.1972	-1.47827e-06	-1.1972	-6.03943e-06	-1.1972	-1.04218e-05
-1.19476	-1.4621e-06	-1.19476	-6.00586e-06	-1.19476	-1.03912e-05
-1.19232	-1.44775e-06	-1.19232	-5.97534e-06	-1.19232	-1.03394e-05
-1.18988	-1.43158e-06	-1.18988	-5.9906e-06	-1.18988	-1.03149e-05
-1.18744	-1.41541e-06	-1.18744	-5.94177e-06	-1.18744	-1.026e-05
-1.185	-1.40167e-06	-1.185	-5.93567e-06	-1.185	-1.02631e-05
-1.18256	-1.38794e-06	-1.18256	-5.88379e-06	-1.18256	-1.026e-05
-1.18011	-1.37146e-06	-1.18011	-5.86243e-06	-1.18011	-1.01868e-05
-1.17767	-1.35712e-06	-1.17767	-5.83191e-06	-1.17767	-1.01624e-05
-1.17523	-1.34308e-06	-1.17523	-5.80444e-06	-1.17523	-1.00983e-05
-1.17279	-1.33026e-06	-1.17279	-5.78613e-06	-1.17279	-1.00922e-05
-1.17035	-1.31653e-06	-1.17035	-5.76477e-06	-1.17035	-1.00372e-05
-1.16791	-1.30219e-06	-1.16791	-5.7312e-06	-1.16791	-9.95789e-06
-1.16547	-1.28906e-06	-1.16547	-5.70984e-06	-1.16547	-9.91821e-06
-1.16302	-1.27502e-06	-1.16302	-5.68848e-06	-1.16302	-9.88464e-06
-1.16058	-1.26221e-06	-1.16058	-5.66406e-06	-1.16058	-9.87244e-06
-1.15814	-1.24939e-06	-1.15814	-5.64575e-06	-1.15814	-9.83276e-06
-1.1557	-1.23718e-06	-1.1557	-5.60608e-06	-1.1557	-9.81445e-06
-1.15326	-1.22467e-06	-1.15326	-5.61829e-06	-1.15326	-9.72595e-06
-1.15082	-1.21185e-06	-1.15082	-5.56946e-06	-1.15082	-9.70459e-06
-1.14838	-1.19934e-06	-1.14838	-5.5481e-06	-1.14838	-9.6405e-06
-1.14594	-1.18713e-06	-1.14594	-5.53284e-06	-1.14594	-9.63745e-06
-1.14349	-1.17676e-06	-1.14349	-5.50842e-06	-1.14349	-9.58557e-06
-1.14105	-1.16333e-06	-1.14105	-5.48401e-06	-1.14105	-9.52759e-06
-1.13861	-1.15234e-06	-1.13861	-5.48096e-06	-1.13861	-9.50317e-06
-1.13617	-1.13983e-06	-1.13617	-5.45349e-06	-1.13617	-9.46655e-06
-1.13373	-1.12854e-06	-1.13373	-5.42603e-06	-1.13373	-9.44519e-06
-1.13129	-1.11786e-06	-1.13129	-5.39551e-06	-1.13129	-9.44519e-06
-1.12885	-1.10718e-06	-1.12885	-5.37109e-06	-1.12885	-9.42078e-06
-1.1264	-1.09589e-06	-1.1264	-5.36804e-06	-1.1264	-9.39331e-06
-1.12396	-1.0849e-06	-1.12396	-5.38025e-06	-1.12396	-9.35669e-06
-1.12152	-1.07452e-06	-1.12152	-5.35583e-06	-1.12152	-9.32617e-06
-1.11908	-1.06384e-06	-1.11908	-5.33142e-06	-1.11908	-9.29871e-06
-1.11664	-1.05316e-06	-1.11664	-5.31616e-06	-1.11664	-9.29565e-06
-1.1142	-1.04431e-06	-1.1142	-5.31006e-06	-1.1142	-9.27429e-06
-1.11176	-1.03394e-06	-1.11176	-5.31006e-06	-1.11176	-9.22852e-06
-1.10931	-1.02325e-06	-1.10931	-5.29785e-06	-1.10931	-9.22546e-06
-1.10687	-1.0141e-06	-1.10687	-5.29175e-06	-1.10687	-9.21936e-06
-1.10443	-1.00403e-06	-1.10443	-5.25208e-06	-1.10443	-9.18274e-06
-1.10199	-9.94263e-07	-1.10199	-5.24902e-06	-1.10199	-9.17053e-06
-1.09955	-9.85107e-07	-1.09955	-5.2124e-06	-1.09955	-9.14307e-06
-1.09711	-9.75037e-07	-1.09711	-5.18799e-06	-1.09711	-9.11865e-06
-1.09467	-9.66797e-07	-1.09467	-5.14526e-06	-1.09467	-9.08203e-06
-1.09222	-9.56116e-07	-1.09222	-5.12695e-06	-1.09222	-9.0332e-06
-1.08978	-9.47876e-07	-1.08978	-5.13e-06	-1.08978	-8.97827e-06
-1.08734	-9.39941e-07	-1.08734	-5.08728e-06	-1.08734	-8.94775e-06
-1.0849	-9.30786e-07	-1.0849	-5.09338e-06	-1.0849	-8.92639e-06
-1.08246	-9.21936e-07	-1.08246	-5.06287e-06	-1.08246	-8.90503e-06
-1.08002	-9.13696e-07	-1.08002	-5.04761e-06	-1.08002	-8.88062e-06
-1.07758	-9.05457e-07	-1.07758	-5.0293e-06	-1.07758	-8.83179e-06
-1.07513	-8.96606e-07	-1.07513	-5.00183e-06	-1.07513	-8.82568e-06
-1.07269	-8.89893e-07	-1.07269	-4.98657e-06	-1.07269	-8.78906e-06
-1.07025	-8.80737e-07	-1.07025	-4.97131e-06	-1.07025	-8.75549e-06
-1.06781	-8.73413e-07	-1.06781	-4.953e-06	-1.06781	-8.70667e-06
-1.06537	-8.65173e-07	-1.06537	-4.92554e-06	-1.06537	-8.74329e-06
-1.06293	-8.56934e-07	-1.06293	-4.94995e-06	-1.06293	-8.6731e-06
-1.06049	-8.48999e-07	-1.06049	-4.91852e-06	-1.06049	-8.65479e-06
-1.05804	-8.43201e-07	-1.05804	-4.8764e-06	-1.05804	-8.63342e-06
-1.0556	-8.35571e-07	-1.0556	-4.86023e-06	-1.0556	-8.60901e-06
-1.05316	-8.27637e-07	-1.05316	-4.85657e-06	-1.05316	-8.59375e-06
-1.05072	-8.20618e-07	-1.05072	-4.83582e-06	-1.05072	-8.57849e-06
-1.04828	-8.13293e-07	-1.04828	-4.81323e-06	-1.04828	-8.52966e-06
-1.04584	-8.0658e-07	-1.04584	-4.77844e-06	-1.04584	-8.55408e-06
-1.0434	-7.9895e-07	-1.0434	-4.79218e-06	-1.0434	-8.53882e-06
-1.04095	-7.91931e-07	-1.04095	-4.76257e-06	-1.04095	-8.56018e-06
-1.03851	-7.84607e-07	-1.03851	-4.7644e-06	-1.03851	-8.52661e-06
-1.03607	-7.77588e-07	-1.03607	-4.7525e-06	-1.03607	-8.48389e-06
-1.03363	-7.71484e-07	-1.03363	-4.7522e-06	-1.03363	-8.43201e-06
-1.03119	-7.6416e-07	-1.03119	-4.72351e-06	-1.03119	-8.37402e-06
-1.02875	-7.59583e-07	-1.02875	-4.72198e-06	-1.02875	-8.3374e-06
-1.02631	-7.51038e-07	-1.02631	-4.71466e-06	-1.02631	-8.3313e-06
-1.02386	-7.45239e-07	-1.02386	-4.69177e-06	-1.02386	-8.33435e-06
-1.02142	-7.39136e-07	-1.02142	-4.67407e-06	-1.02142	-8.28552e-06
-1.01898	-7.32727e-07	-1.01898	-4.67102e-06	-1.01898	-8.26416e-06
-1.01654	-7.26318e-07	-1.01654	-4.61243e-06	-1.01654	-8.21838e-06
-1.0141	-7.20215e-07	-1.0141	-4.62036e-06	-1.0141	-8.19702e-06
-1.01166	-7.14111e-07	-1.01166	-4.61975e-06	-1.01166	-8.19397e-06
-1.00922	-7.08618e-07	-1.00922	-4.59259e-06	-1.00922	-8.17261e-06
-1.00677	-7.0282e-07	-1.00677	-4.57703e-06	-1.00677	-8.14819e-06
-1.00433	-6.97021e-07	-1.00433	-4.55322e-06	-1.00433	-8.12988e-06
-1.00189	-6.90308e-07	-1.00189	-4.54376e-06	-1.00189	-8.09937e-06
-0.99945	-6.84509e-07	-0.99945	-4.53979e-06	-0.99945	-8.06885e-06
-0.99701	-6.79626e-07	-0.99701	-4.505e-06	-0.99701	-8.02002e-06
-0.99457	-6.73218e-07	-0.99457	-4.51111e-06	-0.99457	-8.01697e-06
-0.99213	-6.68335e-07	-0.99213	-4.47815e-06	-0.99213	-7.95898e-06
-0.98969	-6.62231e-07	-0.98969	-4.45892e-06	-0.98969	-7.93457e-06
-0.98724	-6.57043e-07	-0.98724	-4.44214e-06	-0.98724	-7.92847e-06
-0.9848	-6.50635e-07	-0.9848	-4.40948e-06	-0.9848	-7.94373e-06
-0.98236	-6.46667e-07	-0.98236	-4.40338e-06	-0.98236	-7.91626e-06
-0.97992	-6.40259e-07	-0.97992	-4.3866e-06	-0.97992	-7.89795e-06
-0.97748	-6.35071e-07	-0.97748	-4.37042e-06	-0.97748	-7.87048e-06
-0.97504	-6.29578e-07	-0.97504	-4.35303e-06	-0.97504	-7.82776e-06
-0.9726	-6.25305e-07	-0.9726	-4.32495e-06	-0.9726	-7.8186e-06
-0.97015	-6.19812e-07	-0.97015	-4.32892e-06	-0.97015	-7.80029e-06
-0.96771	-6.14624e-07	-0.96771	-4.32159e-06	-0.96771	-7.75757e-06
-0.96527	-6.09131e-07	-0.96527	-4.30481e-06	-0.96527	-7.724e-06
-0.96283	-6.04553e-07	-0.96283	-4.30084e-06	-0.96283	-7.71484e-06
-0.96039	-5.9906e-07	-0.96039	-4.29413e-06	-0.96039	-7.69653e-06
-0.95795	-5.94788e-07	-0.95795	-4.26453e-06	-0.95795	-7.66296e-06
-0.95551	-5.89905e-07	-0.95551	-4.24774e-06	-0.95551	-7.65076e-06
-0.95306	-5.84717e-07	-0.95306	-4.22272e-06	-0.95306	-7.62024e-06
-0.95062	-5.79529e-07	-0.95062	-4.20532e-06	-0.95062	-7.58362e-06
-0.94818	-5.74951e-07	-0.94818	-4.19891e-06	-0.94818	-7.55005e-06
-0.94574	-5.71289e-07	-0.94574	-4.198e-06	-0.94574	-7.547e-06
-0.9433	-5.65796e-07	-0.9433	-4.17847e-06	-0.9433	-7.53174e-06
-0.94086	-5.61523e-07	-0.94086	-4.16962e-06	-0.94086	-7.52869e-06
-0.93842	-5.57251e-07	-0.93842	-4.14642e-06	-0.93842	-7.50732e-06
-0.93597	-5.51147e-07	-0.93597	-4.14978e-06	-0.93597	-7.49207e-06
-0.93353	-5.48096e-07	-0.93353	-4.14337e-06	-0.93353	-7.51953e-06
-0.93109	-5.42603e-07	-0.93109	-4.12109e-06	-0.93109	-7.45239e-06
-0.92865	-5.3772e-07	-0.92865	-4.10767e-06	-0.92865	-7.43103e-06
-0.92621	-5.34058e-07	-0.92621	-4.06586e-06	-0.92621	-7.38525e-06
-0.92377	-5.2887e-07	-0.92377	-4.06311e-06	-0.92377	-7.34558e-06
-0.92133	-5.24292e-07	-0.92133	-4.06036e-06	-0.92133	-7.31506e-06
-0.91888	-5.20935e-07	-0.91888	-4.04907e-06	-0.91888	-7.2998e-06
-0.91644	-5.16052e-07	-0.91644	-4.00726e-06	-0.91644	-7.2876e-06
-0.914	-5.1178e-07	-0.914	-3.99048e-06	-0.914	-7.31201e-06
-0.91156	-5.07507e-07	-0.91156	-4.00757e-06	-0.91156	-7.29065e-06
-0.90912	-5.02625e-07	-0.90912	-3.98163e-06	-0.90912	-7.30896e-06
-0.90668	-4.98047e-07	-0.90668	-3.96637e-06	-0.90668	-7.26624e-06
-0.90424	-4.94995e-07	-0.90424	-3.94409e-06	-0.90424	-7.26013e-06
-0.90179	-4.90723e-07	-0.90179	-3.94379e-06	-0.90179	-7.23267e-06
-0.89935	-4.8645e-07	-0.89935	-3.91022e-06	-0.89935	-7.23877e-06
-0.89691	-4.81567e-07	-0.89691	-3.88702e-06	-0.89691	-7.22046e-06
-0.89447	-4.77051e-07	-0.89447	-3.87299e-06	-0.89447	-7.16553e-06
-0.89203	-4.73602e-07	-0.89203	-3.88275e-06	-0.89203	-7.12585e-06
-0.88959	-4.69116e-07	-0.88959	-3.86993e-06	-0.88959	-7.13501e-06
-0.88715	-4.65637e-07	-0.88715	-3.84796e-06	-0.88715	-7.06482e-06
-0.8847	-4.61761e-07	-0.8847	-3.8266e-06	-0.8847	-7.0282e-06
-0.88226	-4.5697e-07	-0.88226	-3.80493e-06	-0.88226	-7.02515e-06
-0.87982	-4.5401e-07	-0.87982	-3.8031e-06	-0.87982	-7.00073e-06
-0.87738	-4.49554e-07	-0.87738	-3.7851e-06	-0.87738	-6.97937e-06
-0.87494	-4.45557e-07	-0.87494	-3.80737e-06	-0.87494	-6.96106e-06
-0.8725	-4.42078e-07	-0.8725	-3.76892e-06	-0.8725	-6.96411e-06
-0.87006	-4.38507e-07	-0.87006	-3.75946e-06	-0.87006	-6.92749e-06
-0.86761	-4.3396e-07	-0.86761	-3.74817e-06	-0.86761	-6.90002e-06
-0.86517	-4.30725e-07	-0.86517	-3.71521e-06	-0.86517	-6.86646e-06
-0.86273	-4.26788e-07	-0.86273	-3.70941e-06	-0.86273	-6.83289e-06
-0.86029	-4.2334e-07	-0.86029	-3.69141e-06	-0.86029	-6.82373e-06
-0.85785	-4.19006e-07	-0.85785	-3.66974e-06	-0.85785	-6.77795e-06
-0.85541	-4.15619e-07	-0.85541	-3.65662e-06	-0.85541	-6.7688e-06
-0.85297	-4.12109e-07	-0.85297	-3.62946e-06	-0.85297	-6.73828e-06
-0.85052	-4.08722e-07	-0.85052	-3.60931e-06	-0.85052	-6.72302e-06
-0.84808	-4.0506e-07	-0.84808	-3.60687e-06	-0.84808	-6.69556e-06
-0.84564	-4.0152e-07	-0.84564	-3.59497e-06	-0.84564	-6.6803e-06
-0.8432	-3.98315e-07	-0.8432	-3.5788e-06	-0.8432	-6.65588e-06
-0.84076	-3.94714e-07	-0.84076	-3.5556e-06	-0.84076	-6.63452e-06
-0.83832	-3.91388e-07	-0.83832	-3.53088e-06	-0.83832	-6.61011e-06
-0.83588	-3.87604e-07	-0.83588	-3.53455e-06	-0.83588	-6.57959e-06
-0.83344	-3.83972e-07	-0.83344	-3.52722e-06	-0.83344	-6.54907e-06
-0.83099	-3.81165e-07	-0.83099	-3.50708e-06	-0.83099	-6.55518e-06
-0.82855	-3.77502e-07	-0.82855	-3.50922e-06	-0.82855	-6.5033e-06
-0.82611	-3.74207e-07	-0.82611	-3.46832e-06	-0.82611	-6.5155e-06
-0.82367	-3.70636e-07	-0.82367	-3.47382e-06	-0.82367	-6.48499e-06
-0.82123	-3.68256e-07	-0.82123	-3.44666e-06	-0.82123	-6.46362e-06
-0.81879	-3.64166e-07	-0.81879	-3.43781e-06	-0.81879	-6.46057e-06
-0.81635	-3.61053e-07	-0.81635	-3.43231e-06	-0.81635	-6.43616e-06
-0.8139	-3.57819e-07	-0.8139	-3.42377e-06	-0.8139	-6.41785e-06
-0.81146	-3.55377e-07	-0.81146	-3.4137e-06	-0.81146	-6.41479e-06
-0.80902	-3.52142e-07	-0.80902	-3.41187e-06	-0.80902	-6.40564e-06
-0.80658	-3.48877e-07	-0.80658	-3.39752e-06	-0.80658	-6.35986e-06
-0.80414	-3.46069e-07	-0.80414	-3.37311e-06	-0.80414	-6.34766e-06
-0.8017	-3.42987e-07	-0.8017	-3.35175e-06	-0.8017	-6.34766e-06
-0.79926	-3.3963e-07	-0.79926	-3.36182e-06	-0.79926	-6.33545e-06
-0.79681	-3.37006e-07	-0.79681	-3.33099e-06	-0.79681	-6.27747e-06
-0.79437	-3.34625e-07	-0.79437	-3.30688e-06	-0.79437	-6.25305e-06
-0.79193	-3.31207e-07	-0.79193	-3.30414e-06	-0.79193	-6.21033e-06
-0.78949	-3.28339e-07	-0.78949	-3.29102e-06	-0.78949	-6.1554e-06
-0.78705	-3.25775e-07	-0.78705	-3.302e-06	-0.78705	-6.12183e-06
-0.78461	-3.22357e-07	-0.78461	-3.27148e-06	-0.78461	-6.09131e-06
-0.78217	-3.19244e-07	-0.78217	-3.24707e-06	-0.78217	-6.05469e-06
-0.77972	-3.16742e-07	-0.77972	-3.24097e-06	-0.77972	-6.03638e-06
-0.77728	-3.13751e-07	-0.77728	-3.22571e-06	-0.77728	-5.9967e-06
-0.77484	-3.11279e-07	-0.77484	-3.20618e-06	-0.77484	-5.97534e-06
-0.7724	-3.0838e-07	-0.7724	-3.20679e-06	-0.7724	-5.93872e-06
-0.76996	-3.05298e-07	-0.76996	-3.20221e-06	-0.76996	-5.93262e-06
-0.76752	-3.02856e-07	-0.76752	-3.17841e-06	-0.76752	-5.87158e-06
-0.76508	-3.00201e-07	-0.76508	-3.16681e-06	-0.76508	-5.85938e-06
-0.76263	-2.97607e-07	-0.76263	-3.15552e-06	-0.76263	-5.82581e-06
-0.76019	-2.94464e-07	-0.76019	-3.15002e-06	-0.76019	-5.78918e-06
-0.75775	-2.92328e-07	-0.75775	-3.13507e-06	-0.75775	-5.76172e-06
-0.75531	-2.89917e-07	-0.75531	-3.11676e-06	-0.75531	-5.7312e-06
-0.75287	-2.87201e-07	-0.75287	-3.10516e-06	-0.75287	-5.70984e-06
-0.75043	-2.84393e-07	-0.75043	-3.10028e-06	-0.75043	-5.69763e-06
-0.74799	-2.81708e-07	-0.74799	-3.09021e-06	-0.74799	-5.70679e-06
-0.74554	-2.79327e-07	-0.74554	-3.06091e-06	-0.74554	-5.70679e-06
-0.7431	-2.76886e-07	-0.7431	-3.04108e-06	-0.7431	-5.69458e-06
-0.74066	-2.74719e-07	-0.74066	-3.03528e-06	-0.74066	-5.68848e-06
-0.73822	-2.72003e-07	-0.73822	-3.01849e-06	-0.73822	-5.66406e-06
-0.73578	-2.69531e-07	-0.73578	-2.9953e-06	-0.73578	-5.63965e-06
-0.73334	-2.67395e-07	-0.73334	-2.98431e-06	-0.73334	-5.66711e-06
-0.7309	-2.64191e-07	-0.7309	-2.97638e-06	-0.7309	-5.65491e-06
-0.72845	-2.61932e-07	-0.72845	-2.96692e-06	-0.72845	-5.63049e-06
-0.72601	-2.60193e-07	-0.72601	-2.95349e-06	-0.72601	-5.60913e-06
-0.72357	-2.58026e-07	-0.72357	-2.93915e-06	-0.72357	-5.59692e-06
-0.72113	-2.55615e-07	-0.72113	-2.94067e-06	-0.72113	-5.5542e-06
-0.71869	-2.5293e-07	-0.71869	-2.9184e-06	-0.71869	-5.56946e-06
-0.71625	-2.5061e-07	-0.71625	-2.90833e-06	-0.71625	-5.53589e-06
-0.71381	-2.48199e-07	-0.71381	-2.89093e-06	-0.71381	-5.50232e-06
-0.71136	-2.45972e-07	-0.71136	-2.88513e-06	-0.71136	-5.49622e-06
-0.70892	-2.43622e-07	-0.70892	-2.86896e-06	-0.70892	-5.46875e-06
-0.70648	-2.41364e-07	-0.70648	-2.86224e-06	-0.70648	-5.41077e-06
-0.70404	-2.38953e-07	-0.70404	-2.84637e-06	-0.70404	-5.38635e-06
-0.7016	-2.37152e-07	-0.7016	-2.82745e-06	-0.7016	-5.35889e-06
-0.69916	-2.34772e-07	-0.69916	-2.82288e-06	-0.69916	-5.33752e-06
-0.69672	-2.32391e-07	-0.69672	-2.81982e-06	-0.69672	-5.2887e-06
-0.69427	-2.30713e-07	-0.69427	-2.79541e-06	-0.69427	-5.2887e-06
-0.69183	-2.28149e-07	-0.69183	-2.77313e-06	-0.69183	-5.24597e-06
-0.68939	-2.26715e-07	-0.68939	-2.76764e-06	-0.68939	-5.21851e-06
-0.68695	-2.23755e-07	-0.68695	-2.75055e-06	-0.68695	-5.2063e-06
-0.68451	-2.21985e-07	-0.68451	-2.73041e-06	-0.68451	-5.18799e-06
-0.68207	-2.20245e-07	-0.68207	-2.72888e-06	-0.68207	-5.16052e-06
-0.67963	-2.17773e-07	-0.67963	-2.72125e-06	-0.67963	-5.12695e-06
-0.67719	-2.16583e-07	-0.67719	-2.70508e-06	-0.67719	-5.10559e-06
-0.67474	-2.14264e-07	-0.67474	-2.68951e-06	-0.67474	-5.09949e-06
-0.6723	-2.11945e-07	-0.6723	-2.66815e-06	-0.6723	-5.07202e-06
-0.66986	-2.09595e-07	-0.66986	-2.66968e-06	-0.66986	-5.03845e-06
-0.66742	-2.07123e-07	-0.66742	-2.64343e-06	-0.66742	-4.99268e-06
-0.66498	-2.05475e-07	-0.66498	-2.63824e-06	-0.66498	-5.00183e-06
-0.66254	-2.03735e-07	-0.66254	-2.62024e-06	-0.66254	-5.01709e-06
-0.6601	-2.01996e-07	-0.6601	-2.60864e-06	-0.6601	-4.99573e-06
-0.65765	-1.99554e-07	-0.65765	-2.59003e-06	-0.65765	-4.99268e-06
-0.65521	-1.98486e-07	-0.65521	-2.5705e-06	-0.65521	-4.96826e-06
-0.65277	-1.95862e-07	-0.65277	-2.56165e-06	-0.65277	-4.9469e-06
-0.65033	-1.93756e-07	-0.65033	-2.54669e-06	-0.65033	-4.92554e-06
-0.64789	-1.92047e-07	-0.64789	-2.5528e-06	-0.64789	-4.88617e-06
-0.64545	-1.90063e-07	-0.64545	-2.53998e-06	-0.64545	-4.87854e-06
-0.64301	-1.87622e-07	-0.64301	-2.49817e-06	-0.64301	-4.84283e-06
-0.64056	-1.86249e-07	-0.64056	-2.49664e-06	-0.64056	-4.83307e-06
-0.63812	-1.84326e-07	-0.63812	-2.48077e-06	-0.63812	-4.80591e-06
-0.63568	-1.828e-07	-0.63568	-2.47589e-06	-0.63568	-4.77966e-06
-0.63324	-1.80389e-07	-0.63324	-2.45483e-06	-0.63324	-4.78943e-06
-0.6308	-1.78589e-07	-0.6308	-2.46185e-06	-0.6308	-4.74792e-06
-0.62836	-1.763e-07	-0.62836	-2.43317e-06	-0.62836	-4.70734e-06
-0.62592	-1.74835e-07	-0.62592	-2.42981e-06	-0.62592	-4.66034e-06
-0.62347	-1.72577e-07	-0.62347	-2.41241e-06	-0.62347	-4.66278e-06
-0.62103	-1.71417e-07	-0.62103	-2.3941e-06	-0.62103	-4.60602e-06
-0.61859	-1.69403e-07	-0.61859	-2.36969e-06	-0.61859	-4.58038e-06
-0.61615	-1.67358e-07	-0.61615	-2.36481e-06	-0.61615	-4.55536e-06
-0.61371	-1.65131e-07	-0.61371	-2.34894e-06	-0.61371	-4.53735e-06
-0.61127	-1.63818e-07	-0.61127	-2.34528e-06	-0.61127	-4.52057e-06
-0.60883	-1.62567e-07	-0.60883	-2.33612e-06	-0.60883	-4.48883e-06
-0.60638	-1.60309e-07	-0.60638	-2.33032e-06	-0.60638	-4.4519e-06
-0.60394	-1.9046e-07	-0.60394	-2.31354e-06	-0.60394	-4.44489e-06
-0.6015	-1.55975e-07	-0.6015	-2.30194e-06	-0.6015	-4.41895e-06
-0.59906	-1.54388e-07	-0.59906	-2.29156e-06	-0.59906	-4.3988e-06
-0.59662	-1.52985e-07	-0.59662	-2.28485e-06	-0.59662	-4.38354e-06
-0.59418	-1.50421e-07	-0.59418	-2.26807e-06	-0.59418	-4.37988e-06
-0.59174	-1.48743e-07	-0.59174	-2.26257e-06	-0.59174	-4.34601e-06
-0.58929	-1.46912e-07	-0.58929	-2.23755e-06	-0.58929	-4.35089e-06
-0.58685	-1.45264e-07	-0.58685	-2.22168e-06	-0.58685	-4.32892e-06
-0.58441	-1.43005e-07	-0.58441	-2.21497e-06	-0.58441	-4.30267e-06
-0.58197	-1.41876e-07	-0.58197	-2.20337e-06	-0.58197	-4.27368e-06
-0.57953	-1.40015e-07	-0.57953	-2.18567e-06	-0.57953	-4.24072e-06
-0.57709	-1.38397e-07	-0.57709	-2.16522e-06	-0.57709	-4.21082e-06
-0.57465	-1.36292e-07	-0.57465	-2.15637e-06	-0.57465	-4.1806e-06
-0.5722	-1.34247e-07	-0.5722	-2.14783e-06	-0.5722	-4.16656e-06
-0.56976	-1.32019e-07	-0.56976	-2.13043e-06	-0.56976	-4.15741e-06
-0.56732	-1.30615e-07	-0.56732	-2.12311e-06	-0.56732	-4.14185e-06
-0.56488	-1.28448e-07	-0.56488	-2.1051e-06	-0.56488	-4.11804e-06
-0.56244	-1.2677e-07	-0.56244	-2.10052e-06	-0.56244	-4.10065e-06
-0.56	-1.25366e-07	-0.56	-2.08771e-06	-0.56	-4.09424e-06
-0.55756	-1.23047e-07	-0.55756	-2.08862e-06	-0.55756	-4.07104e-06
-0.55511	-1.20911e-07	-0.55511	-2.07733e-06	-0.55511	-4.06372e-06
-0.55267	-1.19995e-07	-0.55267	-2.06696e-06	-0.55267	-4.0387e-06
-0.55023	-1.17554e-07	-0.55023	-2.05109e-06	-0.55023	-4.0213e-06
-0.54779	-1.16089e-07	-0.54779	-2.04346e-06	-0.54779	-4.01001e-06
-0.54535	-1.14014e-07	-0.54535	-2.02606e-06	-0.54535	-3.97308e-06
-0.54291	-1.11908e-07	-0.54291	-2.0163e-06	-0.54291	-3.95294e-06
-0.54047	-1.10382e-07	-0.54047	-1.99921e-06	-0.54047	-3.94318e-06
-0.53802	-1.08215e-07	-0.53802	-1.9873e-06	-0.53802	-3.91022e-06
-0.53558	-1.06079e-07	-0.53558	-1.97723e-06	-0.53558	-3.89648e-06
-0.53314	-1.03729e-07	-0.53314	-1.9632e-06	-0.53314	-3.86139e-06
-0.5307	-1.03149e-07	-0.5307	-1.95374e-06	-0.5307	-3.84247e-06
-0.52826	-1.00525e-07	-0.52826	-1.94092e-06	-0.52826	-3.82446e-06
-0.52582	-9.87549e-08	-0.52582	-1.92596e-06	-0.52582	-3.79425e-06
-0.52338	-9.64661e-08	-0.52338	-1.90155e-06	-0.52338	-3.76831e-06
-0.52094	-9.4696e-08	-0.52094	-1.89758e-06	-0.52094	-3.74237e-06
-0.51849	-9.29565e-08	-0.51849	-1.87653e-06	-0.51849	-3.71124e-06
-0.51605	-9.1217e-08	-0.51605	-1.87378e-06	-0.51605	-3.68225e-06
-0.51361	-8.91418e-08	-0.51361	-1.85425e-06	-0.51361	-3.6795e-06
-0.51117	-8.65173e-08	-0.51117	-1.83838e-06	-0.51117	-3.67645e-06
-0.50873	-8.52051e-08	-0.50873	-1.83838e-06	-0.50873	-3.66516e-06
-0.50629	-8.33435e-08	-0.50629	-1.82678e-06	-0.50629	-3.62823e-06
-0.50385	-8.11157e-08	-0.50385	-1.81702e-06	-0.50385	-3.61084e-06
-0.5014	-7.98035e-08	-0.5014	-1.79321e-06	-0.5014	-3.57758e-06
-0.49896	-7.67822e-08	-0.49896	-1.78101e-06	-0.49896	-3.54828e-06
-0.49652	-7.55615e-08	-0.49652	-1.76697e-06	-0.49652	-3.53363e-06
-0.49408	-7.39136e-08	-0.49408	-1.74927e-06	-0.49408	-3.52325e-06
-0.49164	-7.18689e-08	-0.49164	-1.74347e-06	-0.49164	-3.50586e-06
-0.4892	-7.04041e-08	-0.4892	-1.72943e-06	-0.4892	-3.49274e-06
-0.48676	-6.82068e-08	-0.48676	-1.71631e-06	-0.48676	-3.48022e-06
-0.48431	-6.5918e-08	-0.48431	-1.70807e-06	-0.48431	-3.45825e-06
-0.48187	-6.39954e-08	-0.48187	-1.69037e-06	-0.48187	-3.44727e-06
-0.47943	-6.21643e-08	-0.47943	-1.67755e-06	-0.47943	-3.43414e-06
-0.47699	-6.04858e-08	-0.47699	-1.67053e-06	-0.47699	-3.43445e-06
-0.47455	-5.896e-08	-0.47455	-1.65253e-06	-0.47455	-3.41064e-06
-0.47211	-5.66711e-08	-0.47211	-1.64398e-06	-0.47211	-3.37646e-06
-0.46967	-5.48706e-08	-0.46967	-1.63452e-06	-0.46967	-3.36243e-06
-0.46722	-5.34668e-08	-0.46722	-1.61957e-06	-0.46722	-3.34503e-06
-0.46478	-5.11169e-08	-0.46478	-1.60797e-06	-0.46478	-3.30933e-06
-0.46234	-4.94385e-08	-0.46234	-1.58875e-06	-0.46234	-3.28461e-06
-0.4599	-4.72412e-08	-0.4599	-1.57135e-06	-0.4599	-3.2489e-06
-0.45746	-4.53186e-08	-0.45746	-1.56372e-06	-0.45746	-3.21747e-06
-0.45502	-4.27246e-08	-0.45502	-1.55029e-06	-0.45502	-3.20404e-06
-0.45258	-4.12292e-08	-0.45258	-1.53564e-06	-0.45258	-3.18115e-06
-0.45013	-3.98865e-08	-0.45013	-1.52893e-06	-0.45013	-3.1665e-06
-0.44769	-3.68958e-08	-0.44769	-1.52557e-06	-0.44769	-3.13965e-06
-0.44525	-3.53088e-08	-0.44525	-1.5097e-06	-0.44525	-3.12958e-06
-0.44281	-3.39966e-08	-0.44281	-1.49841e-06	-0.44281	-3.11981e-06
-0.44037	-3.29895e-08	-0.44037	-1.47919e-06	-0.44037	-3.10425e-06
-0.43793	-4.25415e-08	-0.43793	-1.47003e-06	-0.43793	-3.07739e-06
-0.43549	-4.03137e-08	-0.43549	-1.45599e-06	-0.43549	-3.05511e-06
-0.43304	-2.66724e-08	-0.43304	-1.44135e-06	-0.43304	-3.05145e-06
-0.4306	-2.43835e-08	-0.4306	-1.43707e-06	-0.4306	-3.02795e-06
-0.42816	-2.32849e-08	-0.42816	-1.42609e-06	-0.42816	-3.0072e-06
-0.42572	-2.14233e-08	-0.42572	-1.41846e-06	-0.42572	-2.99652e-06
-0.42328	-1.98364e-08	-0.42328	-1.40656e-06	-0.42328	-2.99194e-06
-0.42084	-1.84631e-08	-0.42084	-1.39221e-06	-0.42084	-2.97821e-06
-0.4184	-1.63574e-08	-0.4184	-1.37878e-06	-0.4184	-2.94312e-06
-0.41595	-1.50665e-08	-0.41595	-1.36536e-06	-0.41595	-2.91016e-06
-0.41351	-1.26617e-08	-0.41351	-1.35132e-06	-0.41351	-2.89429e-06
-0.41107	-1.19904e-08	-0.41107	-1.33911e-06	-0.41107	-2.86896e-06
-0.40863	-9.21631e-09	-0.40863	-1.32904e-06	-0.40863	-2.84027e-06
-0.40619	-8.10852e-09	-0.40619	-1.31866e-06	-0.40619	-2.81891e-06
-0.40375	-5.98145e-09	-0.40375	-1.30951e-06	-0.40375	-2.80243e-06
-0.40131	-4.63867e-09	-0.40131	-1.29211e-06	-0.40131	-2.78839e-06
-0.39886	-3.2959e-09	-0.39886	-1.28693e-06	-0.39886	-2.77649e-06
-0.39642	-1.29395e-09	-0.39642	-1.27594e-06	-0.39642	-2.73529e-06
-0.39398	2.41089e-10	-0.39398	-1.2619e-06	-0.39398	-2.71332e-06
-0.39154	1.84937e-09	-0.39154	-1.24847e-06	-0.39154	-2.68005e-06
-0.3891	3.73535e-09	-0.3891	-1.23505e-06	-0.3891	-2.66052e-06
-0.38666	4.88892e-09	-0.38666	-1.22528e-06	-0.38666	-2.6297e-06
-0.38422	6.41785e-09	-0.38422	-1.21277e-06	-0.38422	-2.6178e-06
-0.38177	8.01392e-09	-0.38177	-1.19537e-06	-0.38177	-2.59155e-06
-0.37933	9.36584e-09	-0.37933	-1.1853e-06	-0.37933	-2.56165e-06
-0.37689	1.1322e-08	-0.37689	-1.16882e-06	-0.37689	-2.53357e-06
-0.37445	1.29089e-08	-0.37445	-1.16119e-06	-0.37445	-2.51648e-06
-0.37201	1.36108e-08	-0.37201	-1.14563e-06	-0.37201	-2.48779e-06
-0.36957	1.57166e-08	-0.36957	-1.13831e-06	-0.36957	-2.47162e-06
-0.36713	1.66931e-08	-0.36713	-1.1319e-06	-0.36713	-2.4411e-06
-0.36469	1.80359e-08	-0.36469	-1.12213e-06	-0.36469	-2.43195e-06
-0.36224	1.93481e-08	-0.36224	-1.10962e-06	-0.36224	-2.41119e-06
-0.3598	2.12402e-08	-0.3598	-1.09558e-06	-0.3598	-2.38434e-06
-0.35736	2.28882e-08	-0.35736	-1.08124e-06	-0.35736	-2.36725e-06
-0.35492	2.41089e-08	-0.35492	-1.06873e-06	-0.35492	-2.341e-06
-0.35248	2.52991e-08	-0.35248	-1.05865e-06	-0.35248	-2.3172e-06
-0.35004	2.6886e-08	-0.35004	-1.04889e-06	-0.35004	-2.28729e-06
-0.3476	2.78015e-08	-0.3476	-1.04218e-06	-0.3476	-2.27295e-06
-0.34515	2.93884e-08	-0.34515	-1.02905e-06	-0.34515	-2.2583e-06
-0.34271	3.12805e-08	-0.34271	-1.01349e-06	-0.34271	-2.21954e-06
-0.34027	3.16467e-08	-0.34027	-1.00525e-06	-0.34027	-2.20886e-06
-0.33783	3.33862e-08	-0.33783	-9.9884e-07	-0.33783	-2.18323e-06
-0.33539	3.45764e-08	-0.33539	-9.93042e-07	-0.33539	-2.1582e-06
-0.33295	3.5614e-08	-0.33295	-9.80225e-07	-0.33295	-2.14386e-06
-0.33051	3.67737e-08	-0.33051	-9.68018e-07	-0.33051	-2.11243e-06
-0.32806	3.81165e-08	-0.32806	-9.58252e-07	-0.32806	-2.08771e-06
-0.32562	3.93372e-08	-0.32562	-9.44824e-07	-0.32562	-2.0639e-06
-0.32318	3.98865e-08	-0.32318	-9.28955e-07	-0.32318	-2.04132e-06
-0.32074	4.10461e-08	-0.32074	-9.21326e-07	-0.32074	-2.02545e-06
-0.3183	4.12598e-08	-0.3183	-9.06372e-07	-0.3183	-1.99951e-06
-0.31586	4.3457e-08	-0.31586	-9.021e-07	-0.31586	-1.97723e-06
-0.31342	4.51965e-08	-0.31342	-8.88977e-07	-0.31342	-1.96655e-06
-0.31097	4.599e-08	-0.31097	-8.78296e-07	-0.31097	-1.94611e-06
-0.30853	4.6875e-08	-0.30853	-8.6731e-07	-0.30853	-1.93665e-06
-0.30609	4.7821e-08	-0.30609	-8.55713e-07	-0.30609	-1.91925e-06
-0.30365	4.88892e-08	-0.30365	-8.45947e-07	-0.30365	-1.90552e-06
-0.30121	5.05981e-08	-0.30121	-8.43506e-07	-0.30121	-1.89331e-06
-0.29877	5.15442e-08	-0.29877	-8.33435e-07	-0.29877	-1.87622e-06
-0.29633	5.26428e-08	-0.29633	-8.21533e-07	-0.29633	-1.85547e-06
-0.29388	5.35583e-08	-0.29388	-8.10547e-07	-0.29388	-1.83044e-06
-0.29144	5.49011e-08	-0.29144	-7.99255e-07	-0.29144	-1.81213e-06
-0.289	5.57556e-08	-0.289	-7.87659e-07	-0.289	-1.79169e-06
-0.28656	5.69153e-08	-0.28656	-7.7179e-07	-0.28656	-1.76636e-06
-0.28412	5.75256e-08	-0.28412	-7.68433e-07	-0.28412	-1.74561e-06
-0.28168	5.84106e-08	-0.28168	-7.58667e-07	-0.28168	-1.72852e-06
-0.27924	5.95398e-08	-0.27924	-7.44629e-07	-0.27924	-1.71448e-06
-0.27679	6.11572e-08	-0.27679	-7.32727e-07	-0.27679	-1.68121e-06
-0.27435	6.10962e-08	-0.27435	-7.22961e-07	-0.27435	-1.67145e-06
-0.27191	6.26526e-08	-0.27191	-7.15637e-07	-0.27191	-1.65009e-06
-0.26947	6.32629e-08	-0.26947	-7.00684e-07	-0.26947	-1.62781e-06
-0.26703	6.46057e-08	-0.26703	-6.92444e-07	-0.26703	-1.60553e-06
-0.26459	6.50024e-08	-0.26459	-6.79932e-07	-0.26459	-1.58661e-06
-0.26215	6.62231e-08	-0.26215	-6.78711e-07	-0.26215	-1.56006e-06
-0.2597	6.66809e-08	-0.2597	-6.6864e-07	-0.2597	-1.54541e-06
-0.25726	6.83899e-08	-0.25726	-6.57959e-07	-0.25726	-1.52832e-06
-0.25482	6.86035e-08	-0.25482	-6.49109e-07	-0.25482	-1.50726e-06
-0.25238	6.98242e-08	-0.25238	-6.37512e-07	-0.25238	-1.48712e-06
-0.24994	7.00378e-08	-0.24994	-6.32019e-07	-0.24994	-1.47247e-06
-0.2475	7.12891e-08	-0.2475	-6.24695e-07	-0.2475	-1.44684e-06
-0.24506	7.20215e-08	-0.24506	-6.11877e-07	-0.24506	-1.4267e-06
-0.24261	7.34253e-08	-0.24261	-5.9967e-07	-0.24261	-1.40869e-06
-0.24017	7.39136e-08	-0.24017	-5.9082e-07	-0.24017	-1.38855e-06
-0.23773	7.4646e-08	-0.23773	-5.8197e-07	-0.23773	-1.36444e-06
-0.23529	7.56836e-08	-0.23529	-5.7312e-07	-0.23529	-1.34644e-06
-0.23285	7.64465e-08	-0.23285	-5.65186e-07	-0.23285	-1.32843e-06
-0.23041	7.73315e-08	-0.23041	-5.52673e-07	-0.23041	-1.31256e-06
-0.22797	7.85217e-08	-0.22797	-5.41382e-07	-0.22797	-1.29608e-06
-0.22552	7.93152e-08	-0.22552	-5.2887e-07	-0.22552	-1.27777e-06
-0.22308	7.95898e-08	-0.22308	-5.2124e-07	-0.22308	-1.25763e-06
-0.22064	8.02612e-08	-0.22064	-5.16052e-07	-0.22064	-1.24207e-06
-0.2182	8.15735e-08	-0.2182	-5.05066e-07	-0.2182	-1.22284e-06
-0.21576	8.25806e-08	-0.21576	-4.97131e-07	-0.21576	-1.20331e-06
-0.21332	8.29163e-08	-0.21332	-4.86145e-07	-0.21332	-1.185e-06
-0.21088	8.32825e-08	-0.21088	-4.7821e-07	-0.21088	-1.16211e-06
-0.20844	8.47778e-08	-0.20844	-4.67529e-07	-0.20844	-1.14563e-06
-0.20599	8.49304e-08	-0.20599	-4.55933e-07	-0.20599	-1.12396e-06
-0.20355	8.62732e-08	-0.20355	-4.41193e-07	-0.20355	-1.1026e-06
-0.20111	8.71277e-08	-0.20111	-4.328e-07	-0.20111	-1.08948e-06
-0.19867	8.82568e-08	-0.19867	-4.25507e-07	-0.19867	-1.06873e-06
-0.19623	8.81958e-08	-0.19623	-4.12201e-07	-0.19623	-1.04828e-06
-0.19379	8.89282e-08	-0.19379	-4.02588e-07	-0.19379	-1.02783e-06
-0.19135	8.99963e-08	-0.19135	-3.96912e-07	-0.19135	-1.00525e-06
-0.1889	9.06982e-08	-0.1889	-3.84827e-07	-0.1889	-9.95483e-07
-0.18646	9.12781e-08	-0.18646	-3.79028e-07	-0.18646	-9.76563e-07
-0.18402	9.22546e-08	-0.18402	-3.71582e-07	-0.18402	-9.61304e-07
-0.18158	9.30176e-08	-0.18158	-3.66211e-07	-0.18158	-9.4635e-07
-0.17914	9.39331e-08	-0.17914	-3.54095e-07	-0.17914	-9.27124e-07
-0.1767	9.47266e-08	-0.1767	-3.4259e-07	-0.1767	-9.16138e-07
-0.17426	9.53979e-08	-0.17426	-3.32123e-07	-0.17426	-8.96301e-07
-0.17181	9.60388e-08	-0.17181	-3.25562e-07	-0.17181	-8.81958e-07
-0.16937	9.67712e-08	-0.16937	-3.17963e-07	-0.16937	-8.61816e-07
-0.16693	9.7229e-08	-0.16693	-3.07617e-07	-0.16693	-8.43506e-07
-0.16449	9.84802e-08	-0.16449	-2.99072e-07	-0.16449	-8.26111e-07
-0.16205	9.89685e-08	-0.16205	-2.9068e-07	-0.16205	-8.12378e-07
-0.15961	9.97925e-08	-0.15961	-2.81708e-07	-0.15961	-7.94373e-07
-0.15717	1.00372e-07	-0.15717	-2.73926e-07	-0.15717	-7.724e-07
-0.15472	1.01379e-07	-0.15472	-2.63916e-07	-0.15472	-7.58972e-07
-0.15228	1.01563e-07	-0.15228	-2.56165e-07	-0.15228	-7.40967e-07
-0.14984	1.026e-07	-0.14984	-2.46796e-07	-0.14984	-7.22046e-07
-0.1474	1.03058e-07	-0.1474	-2.38708e-07	-0.1474	-7.05261e-07
-0.14496	1.04034e-07	-0.14496	-2.29218e-07	-0.14496	-6.88782e-07
-0.14252	1.04767e-07	-0.14252	-2.20978e-07	-0.14252	-6.66809e-07
-0.14008	1.05682e-07	-0.14008	-2.13867e-07	-0.14008	-6.47888e-07
-0.13763	1.05988e-07	-0.13763	-2.04559e-07	-0.13763	-6.30188e-07
-0.13519	1.06628e-07	-0.13519	-1.93695e-07	-0.13519	-6.12183e-07
-0.13275	1.07605e-07	-0.13275	-1.8634e-07	-0.13275	-5.9967e-07
-0.13031	1.08398e-07	-0.13031	-1.77856e-07	-0.13031	-5.79834e-07
-0.12787	1.08734e-07	-0.12787	-1.67419e-07	-0.12787	-5.63049e-07
-0.12543	1.09894e-07	-0.12543	-1.58081e-07	-0.12543	-5.45044e-07
-0.12299	1.10291e-07	-0.12299	-1.49872e-07	-0.12299	-5.25818e-07
-0.12054	1.11237e-07	-0.12054	-1.43738e-07	-0.12054	-5.09644e-07
-0.1181	1.12274e-07	-0.1181	-1.3739e-07	-0.1181	-4.88586e-07
-0.11566	1.12305e-07	-0.11566	-1.26862e-07	-0.11566	-4.71497e-07
-0.11322	1.12946e-07	-0.11322	-1.22009e-07	-0.11322	-4.55322e-07
-0.11078	1.14075e-07	-0.11078	-1.12213e-07	-0.11078	-4.36096e-07
-0.10834	1.14441e-07	-0.10834	-1.02753e-07	-0.10834	-4.19312e-07
-0.1059	1.14807e-07	-0.1059	-9.52148e-08	-0.1059	-4.05518e-07
-0.10345	1.15692e-07	-0.10345	-8.68225e-08	-0.10345	-3.88062e-07
-0.10101	1.16882e-07	-0.10101	-7.8949e-08	-0.10101	-3.70667e-07
-0.09857	1.16699e-07	-0.09857	-7.02515e-08	-0.09857	-3.56232e-07
-0.09613	1.17401e-07	-0.09613	-6.1615e-08	-0.09613	-3.39478e-07
-0.09369	1.18225e-07	-0.09369	-5.34668e-08	-0.09369	-3.23059e-07
-0.09125	1.18958e-07	-0.09125	-4.53186e-08	-0.09125	-3.06976e-07
-0.08881	1.19843e-07	-0.08881	-3.68042e-08	-0.08881	-2.90802e-07
-0.08636	1.20514e-07	-0.08636	-2.82593e-08	-0.08636	-2.74048e-07
-0.08392	1.21246e-07	-0.08392	-2.02942e-08	-0.08392	-2.56927e-07
-0.08148	1.21338e-07	-0.08148	-1.22986e-08	-0.08148	-2.42126e-07
-0.07904	1.22559e-07	-0.07904	-5.83496e-09	-0.07904	-2.25525e-07
-0.0766	1.23444e-07	-0.0766	2.7771e-09	-0.0766	-2.07306e-07
-0.07416	1.23657e-07	-0.07416	1.00403e-08	-0.07416	-1.93787e-07
-0.07172	1.24786e-07	-0.07172	1.7395e-08	-0.07172	-1.78162e-07
-0.06927	1.24817e-07	-0.06927	2.66724e-08	-0.06927	-1.62659e-07
-0.06683	1.25153e-07	-0.06683	3.38135e-08	-0.06683	-1.44226e-07
-0.06439	1.26404e-07	-0.06439	4.1687e-08	-0.06439	-1.27167e-07
-0.06195	1.26862e-07	-0.06195	4.85535e-08	-0.06195	-1.1203e-07
-0.05951	1.27502e-07	-0.05951	5.71899e-08	-0.05951	-9.8938e-08
-0.05707	1.27441e-07	-0.05707	6.49719e-08	-0.05707	-8.39233e-08
-0.05463	1.28815e-07	-0.05463	7.26929e-08	-0.05463	-6.9519e-08
-0.05219	1.29272e-07	-0.05219	7.88574e-08	-0.05219	-5.41382e-08
-0.04974	1.29883e-07	-0.04974	8.71887e-08	-0.04974	-3.64075e-08
-0.0473	1.30188e-07	-0.0473	9.57642e-08	-0.0473	-2.09656e-08
-0.04486	1.31226e-07	-0.04486	1.03821e-07	-0.04486	-6.80542e-09
-0.04242	1.31378e-07	-0.04242	1.12244e-07	-0.04242	9.27734e-09
-0.03998	1.31622e-07	-0.03998	1.19843e-07	-0.03998	2.35291e-08
-0.03754	1.3269e-07	-0.03754	1.27808e-07	-0.03754	4.00085e-08
-0.0351	1.33362e-07	-0.0351	1.34857e-07	-0.0351	5.51147e-08
-0.03265	1.34186e-07	-0.03265	1.42914e-07	-0.03265	6.99768e-08
-0.03021	1.34613e-07	-0.03021	1.50116e-07	-0.03021	8.39539e-08
-0.02777	1.35956e-07	-0.02777	1.58813e-07	-0.02777	9.88159e-08
-0.02533	1.36169e-07	-0.02533	1.65924e-07	-0.02533	1.138e-07
-0.02289	1.36963e-07	-0.02289	1.74438e-07	-0.02289	1.29089e-07
-0.02045	1.37695e-07	-0.02045	1.81458e-07	-0.02045	1.43921e-07
-0.01801	1.38e-07	-0.01801	1.90582e-07	-0.01801	1.59332e-07
-0.01556	1.38611e-07	-0.01556	1.97906e-07	-0.01556	1.74957e-07
-0.01312	1.39496e-07	-0.01312	2.06299e-07	-0.01312	1.89209e-07
-0.01068	1.40106e-07	-0.01068	2.13989e-07	-0.01068	2.04773e-07
-0.00824	1.40808e-07	-0.00824	2.21191e-07	-0.00824	2.20184e-07
-0.0058	1.45081e-07	-0.0058	2.29279e-07	-0.0058	2.34711e-07
-0.00336	1.41571e-07	-0.00336	2.37213e-07	-0.00336	2.50824e-07
-0.000915527	1.42517e-07	-0.000915527	2.44293e-07	-0.000915527	2.65045e-07
0.00153	1.42975e-07	0.00153	2.53387e-07	0.00153	2.80975e-07
0.00397	1.43982e-07	0.00397	2.60376e-07	0.00397	2.96234e-07
0.00641	1.44409e-07	0.00641	2.6886e-07	0.00641	3.12225e-07
0.00885	1.44806e-07	0.00885	2.76947e-07	0.00885	3.27179e-07
0.01129	1.45447e-07	0.01129	2.86194e-07	0.01129	3.42743e-07
0.01373	1.46118e-07	0.01373	2.93549e-07	0.01373	3.58643e-07
0.01617	1.46454e-07	0.01617	3.02704e-07	0.01617	3.7442e-07
0.01862	1.47095e-07	0.01862	3.10364e-07	0.01862	3.90228e-07
0.02106	1.48621e-07	0.02106	3.19489e-07	0.02106	4.06525e-07
0.0235	1.48743e-07	0.0235	3.26263e-07	0.0235	4.21814e-07
0.02594	1.49109e-07	0.02594	3.3548e-07	0.02594	4.37866e-07
0.02838	1.50024e-07	0.02838	3.44086e-07	0.02838	4.54926e-07
0.03082	1.50818e-07	0.03082	3.53882e-07	0.03082	4.70886e-07
0.03326	1.5152e-07	0.03326	3.60779e-07	0.03326	4.87793e-07
0.03571	1.52039e-07	0.03571	3.69476e-07	0.03571	5.04181e-07
0.03815	1.52222e-07	0.03815	3.7851e-07	0.03815	5.20081e-07
0.04059	1.5271e-07	0.04059	3.85986e-07	0.04059	5.36255e-07
0.04303	1.53809e-07	0.04303	3.9566e-07	0.04303	5.52856e-07
0.04547	1.54449e-07	0.04547	4.03381e-07	0.04547	5.69946e-07
0.04791	1.55212e-07	0.04791	4.11224e-07	0.04791	5.87769e-07
0.05035	1.56708e-07	0.05035	4.20197e-07	0.05035	6.03943e-07
0.0528	1.55914e-07	0.0528	4.28467e-07	0.0528	6.20117e-07
0.05524	1.56799e-07	0.05524	4.37561e-07	0.05524	6.35681e-07
0.05768	1.57227e-07	0.05768	4.46259e-07	0.05768	6.54297e-07
0.06012	1.5802e-07	0.06012	4.54987e-07	0.06012	6.73218e-07
0.06256	1.58508e-07	0.06256	4.63715e-07	0.06256	6.90613e-07
0.065	1.58691e-07	0.065	4.72992e-07	0.065	7.04956e-07
0.06744	1.59607e-07	0.06744	4.82483e-07	0.06744	7.23267e-07
0.06989	1.60583e-07	0.06989	4.91302e-07	0.06989	7.41577e-07
0.07233	1.6098e-07	0.07233	4.99542e-07	0.07233	7.56836e-07
0.07477	1.62018e-07	0.07477	5.10254e-07	0.07477	7.76062e-07
0.07721	1.62537e-07	0.07721	5.18127e-07	0.07721	7.92236e-07
0.07965	1.6333e-07	0.07965	5.28748e-07	0.07965	8.06885e-07
0.08209	1.63757e-07	0.08209	5.37659e-07	0.08209	8.25195e-07
0.08453	1.64276e-07	0.08453	5.47882e-07	0.08453	8.44727e-07
0.08698	1.65131e-07	0.08698	5.58899e-07	0.08698	8.5968e-07
0.08942	1.66901e-07	0.08942	5.67566e-07	0.08942	8.80737e-07
0.09186	1.66656e-07	0.09186	5.76477e-07	0.09186	8.92639e-07
0.0943	1.67206e-07	0.0943	5.88104e-07	0.0943	9.1095e-07
0.09674	1.67328e-07	0.09674	5.95886e-07	0.09674	9.26514e-07
0.09918	1.68579e-07	0.09918	6.07178e-07	0.09918	9.41772e-07
0.10162	1.69128e-07	0.10162	6.13708e-07	0.10162	9.60388e-07
0.10406	1.69769e-07	0.10406	6.2561e-07	0.10406	9.78394e-07
0.10651	1.70502e-07	0.10651	6.31409e-07	0.10651	9.94873e-07
0.10895	1.71173e-07	0.10895	6.45752e-07	0.10895	1.01074e-06
0.11139	1.71417e-07	0.11139	6.52466e-07	0.11139	1.02539e-06
0.11383	1.72577e-07	0.11383	6.61011e-07	0.11383	1.04248e-06
0.11627	1.73126e-07	0.11627	6.72302e-07	0.11627	1.05774e-06
0.11871	1.74072e-07	0.11871	6.81763e-07	0.11871	1.07971e-06
0.12115	1.74866e-07	0.12115	6.91528e-07	0.12115	1.09955e-06
0.1236	1.74805e-07	0.1236	7.03735e-07	0.1236	1.1203e-06
0.12604	1.75568e-07	0.12604	7.13501e-07	0.12604	1.13586e-06
0.12848	1.7627e-07	0.12848	7.1991e-07	0.12848	1.15265e-06
0.13092	1.77185e-07	0.13092	7.33643e-07	0.13092	1.17096e-06
0.13336	1.78406e-07	0.13336	7.4585e-07	0.13336	1.19202e-06
0.1358	1.78741e-07	0.1358	7.53479e-07	0.1358	1.20667e-06
0.13824	1.79199e-07	0.13824	7.65076e-07	0.13824	1.22437e-06
0.14069	1.7984e-07	0.14069	7.73926e-07	0.14069	1.24298e-06
0.14313	1.80206e-07	0.14313	7.84302e-07	0.14313	1.26373e-06
0.14557	1.81274e-07	0.14557	7.97424e-07	0.14557	1.28326e-06
0.14801	1.81885e-07	0.14801	8.078e-07	0.14801	1.3031e-06
0.15045	1.82465e-07	0.15045	8.1604e-07	0.15045	1.32019e-06
0.15289	1.83716e-07	0.15289	8.28247e-07	0.15289	1.33972e-06
0.15533	1.83838e-07	0.15533	8.43201e-07	0.15533	1.3562e-06
0.15778	1.85913e-07	0.15778	8.52356e-07	0.15778	1.37543e-06
0.16022	1.8512e-07	0.16022	8.60901e-07	0.16022	1.39374e-06
0.16266	1.85944e-07	0.16266	8.75854e-07	0.16266	1.41815e-06
0.1651	1.86829e-07	0.1651	8.88062e-07	0.1651	1.43585e-06
0.16754	1.87744e-07	0.16754	8.97827e-07	0.16754	1.45386e-06
0.16998	1.87805e-07	0.16998	9.07593e-07	0.16998	1.47156e-06
0.17242	1.8869e-07	0.17242	9.18274e-07	0.17242	1.48956e-06
0.17487	1.89331e-07	0.17487	9.31396e-07	0.17487	1.51001e-06
0.17731	1.90338e-07	0.17731	9.38721e-07	0.17731	1.5332e-06
0.17975	1.9162e-07	0.17975	9.53674e-07	0.17975	1.5506e-06
0.18219	1.92261e-07	0.18219	9.66797e-07	0.18219	1.56982e-06
0.18463	1.94183e-07	0.18463	9.78088e-07	0.18463	1.5863e-06
0.18707	1.93939e-07	0.18707	9.92432e-07	0.18707	1.60675e-06
0.18951	1.94611e-07	0.18951	9.98535e-07	0.18951	1.63025e-06
0.19196	1.95374e-07	0.19196	1.01013e-06	0.19196	1.64703e-06
0.1944	1.96289e-07	0.1944	1.02234e-06	0.1944	1.6684e-06
0.19684	1.97266e-07	0.19684	1.03607e-06	0.19684	1.68243e-06
0.19928	1.9812e-07	0.19928	1.0495e-06	0.19928	1.70837e-06
0.20172	1.98456e-07	0.20172	1.06201e-06	0.20172	1.72516e-06
0.20416	2.00043e-07	0.20416	1.07819e-06	0.20416	1.74469e-06
0.2066	2.00623e-07	0.2066	1.08826e-06	0.2066	1.76422e-06
0.20905	2.01477e-07	0.20905	1.09589e-06	0.20905	1.78589e-06
0.21149	2.02271e-07	0.21149	1.1142e-06	0.21149	1.80786e-06
0.21393	2.03461e-07	0.21393	1.11816e-06	0.21393	1.8277e-06
0.21637	2.04285e-07	0.21637	1.13342e-06	0.21637	1.85425e-06
0.21881	2.04407e-07	0.21881	1.15082e-06	0.21881	1.87286e-06
0.22125	2.05475e-07	0.22125	1.16455e-06	0.22125	1.89209e-06
0.22369	2.06696e-07	0.22369	1.17645e-06	0.22369	1.91345e-06
0.22614	2.0816e-07	0.22614	1.18774e-06	0.22614	1.93146e-06
0.22858	2.08923e-07	0.22858	1.20209e-06	0.22858	1.94885e-06
0.23102	2.09412e-07	0.23102	1.21704e-06	0.23102	1.96991e-06
0.23346	2.10693e-07	0.23346	1.22345e-06	0.23346	1.98486e-06
0.2359	2.11914e-07	0.2359	1.23962e-06	0.2359	2.00714e-06
0.23834	2.12402e-07	0.23834	1.26007e-06	0.23834	2.0285e-06
0.24078	2.13623e-07	0.24078	1.27136e-06	0.24078	2.05475e-06
0.24323	2.14874e-07	0.24323	1.28693e-06	0.24323	2.07336e-06
0.24567	2.1637e-07	0.24567	1.30157e-06	0.24567	2.09381e-06
0.24811	2.16797e-07	0.24811	1.31073e-06	0.24811	2.12006e-06
0.25055	2.17743e-07	0.25055	1.3269e-06	0.25055	2.13867e-06
0.25299	2.19055e-07	0.25299	1.34064e-06	0.25299	2.16583e-06
0.25543	2.20093e-07	0.25543	1.35193e-06	0.25543	2.18628e-06
0.25787	2.20978e-07	0.25787	1.37054e-06	0.25787	2.21191e-06
0.26031	2.22107e-07	0.26031	1.38123e-06	0.26031	2.22504e-06
0.26276	2.22992e-07	0.26276	1.39557e-06	0.26276	2.2525e-06
0.2652	2.24609e-07	0.2652	1.41083e-06	0.2652	2.27295e-06
0.26764	2.24701e-07	0.26764	1.42944e-06	0.26764	2.30225e-06
0.27008	2.26776e-07	0.27008	1.44318e-06	0.27008	2.32666e-06
0.27252	2.27448e-07	0.27252	1.45325e-06	0.27252	2.34283e-06
0.27496	2.29004e-07	0.27496	1.47369e-06	0.27496	2.36664e-06
0.2774	2.30133e-07	0.2774	1.48407e-06	0.2774	2.38861e-06
0.27985	2.31293e-07	0.27985	1.49628e-06	0.27985	2.40845e-06
0.28229	2.32239e-07	0.28229	1.51031e-06	0.28229	2.42645e-06
0.28473	2.3407e-07	0.28473	1.52039e-06	0.28473	2.45331e-06
0.28717	2.35199e-07	0.28717	1.53748e-06	0.28717	2.48474e-06
0.28961	2.36572e-07	0.28961	1.54877e-06	0.28961	2.50183e-06
0.29205	2.38007e-07	0.29205	1.56586e-06	0.29205	2.52411e-06
0.29449	2.39227e-07	0.29449	1.58051e-06	0.29449	2.55188e-06
0.29694	2.40692e-07	0.29694	1.60095e-06	0.29694	2.56866e-06
0.29938	2.42157e-07	0.29938	1.61835e-06	0.29938	2.59857e-06
0.30182	2.4353e-07	0.30182	1.62994e-06	0.30182	2.62024e-06
0.30426	2.45026e-07	0.30426	1.64612e-06	0.30426	2.64526e-06
0.3067	2.46246e-07	0.3067	1.67267e-06	0.3067	2.67426e-06
0.30914	2.48016e-07	0.30914	1.68121e-06	0.30914	2.69409e-06
0.31158	2.49542e-07	0.31158	1.69617e-06	0.31158	2.71332e-06
0.31403	2.5119e-07	0.31403	1.71021e-06	0.31403	2.73987e-06
0.31647	2.52228e-07	0.31647	1.72638e-06	0.31647	2.76123e-06
0.31891	2.54456e-07	0.31891	1.73676e-06	0.31891	2.78229e-06
0.32135	2.55829e-07	0.32135	1.75873e-06	0.32135	2.80762e-06
0.32379	2.57355e-07	0.32379	1.77063e-06	0.32379	2.83844e-06
0.32623	2.58942e-07	0.32623	1.79077e-06	0.32623	2.86407e-06
0.32867	2.6062e-07	0.32867	1.81122e-06	0.32867	2.89948e-06
0.33112	2.62329e-07	0.33112	1.82648e-06	0.33112	2.9245e-06
0.33356	2.63916e-07	0.33356	1.83533e-06	0.33356	2.95197e-06
0.336	2.65289e-07	0.336	1.85577e-06	0.336	2.97272e-06
0.33844	2.67395e-07	0.33844	1.87775e-06	0.33844	2.99316e-06
0.34088	2.69318e-07	0.34088	1.89423e-06	0.34088	3.01392e-06
0.34332	2.70569e-07	0.34332	1.91223e-06	0.34332	3.04199e-06
0.34576	2.73041e-07	0.34576	1.92688e-06	0.34576	3.06824e-06
0.34821	2.75024e-07	0.34821	1.93817e-06	0.34821	3.09631e-06
0.35065	2.7655e-07	0.35065	1.95404e-06	0.35065	3.11584e-06
0.35309	2.78839e-07	0.35309	1.96655e-06	0.35309	3.13293e-06
0.35553	2.80518e-07	0.35553	1.98639e-06	0.35553	3.16376e-06
0.35797	2.82623e-07	0.35797	1.99677e-06	0.35797	3.17841e-06
0.36041	2.83966e-07	0.36041	2.02026e-06	0.36041	3.21228e-06
0.36285	2.86377e-07	0.36285	2.03857e-06	0.36285	3.24615e-06
0.3653	2.88574e-07	0.3653	2.05627e-06	0.3653	3.27454e-06
0.36774	2.90253e-07	0.36774	2.06879e-06	0.36774	3.29895e-06
0.37018	2.92114e-07	0.37018	2.08679e-06	0.37018	3.34259e-06
0.37262	2.94952e-07	0.37262	2.10999e-06	0.37262	3.36609e-06
0.37506	2.96295e-07	0.37506	2.12219e-06	0.37506	3.38623e-06
0.3775	2.98157e-07	0.3775	2.13501e-06	0.3775	3.40424e-06
0.37994	3.00354e-07	0.37994	2.15515e-06	0.37994	3.43201e-06
0.38239	3.02795e-07	0.38239	2.16827e-06	0.38239	3.46985e-06
0.38483	3.04596e-07	0.38483	2.18719e-06	0.38483	3.47839e-06
0.38727	3.07068e-07	0.38727	2.20062e-06	0.38727	3.51776e-06
0.38971	3.09265e-07	0.38971	2.21893e-06	0.38971	3.54248e-06
0.39215	3.11401e-07	0.39215	2.22504e-06	0.39215	3.57513e-06
0.39459	3.13721e-07	0.39459	2.24915e-06	0.39459	3.60779e-06
0.39703	3.15552e-07	0.39703	2.26807e-06	0.39703	3.62518e-06
0.39948	3.17596e-07	0.39948	2.28088e-06	0.39948	3.64685e-06
0.40192	3.20648e-07	0.40192	2.30652e-06	0.40192	3.67065e-06
0.40436	3.2312e-07	0.40436	2.31934e-06	0.40436	3.70087e-06
0.4068	3.25592e-07	0.4068	2.33368e-06	0.4068	3.71582e-06
0.40924	3.27576e-07	0.40924	2.3584e-06	0.40924	3.73535e-06
0.41168	3.30139e-07	0.41168	2.37701e-06	0.41168	3.76495e-06
0.41412	3.32642e-07	0.41412	2.3819e-06	0.41412	3.79547e-06
0.41656	3.34259e-07	0.41656	2.4057e-06	0.41656	3.82172e-06
0.41901	3.3725e-07	0.41901	2.4234e-06	0.41901	3.85529e-06
0.42145	3.40118e-07	0.42145	2.43896e-06	0.42145	3.87421e-06
0.42389	3.42499e-07	0.42389	2.46002e-06	0.42389	3.89435e-06
0.42633	3.44757e-07	0.42633	2.47437e-06	0.42633	3.92914e-06
0.42877	3.46954e-07	0.42877	2.49603e-06	0.42877	3.94562e-06
0.43121	3.49854e-07	0.43121	2.51343e-06	0.43121	3.97278e-06
0.43365	3.51898e-07	0.43365	2.54547e-06	0.43365	4.00085e-06
0.4361	3.5437e-07	0.4361	2.56226e-06	0.4361	4.03442e-06
0.43854	3.57391e-07	0.43854	2.57935e-06	0.43854	4.07776e-06
0.44098	3.60077e-07	0.44098	2.59125e-06	0.44098	4.10034e-06
0.44342	3.62e-07	0.44342	2.59827e-06	0.44342	4.12354e-06
0.44586	3.65662e-07	0.44586	2.61749e-06	0.44586	4.14856e-06
0.4483	3.6795e-07	0.4483	2.63367e-06	0.4483	4.17419e-06
0.45074	3.69995e-07	0.45074	2.65259e-06	0.45074	4.20898e-06
0.45319	3.72833e-07	0.45319	2.66968e-06	0.45319	4.24133e-06
0.45563	3.75702e-07	0.45563	2.69135e-06	0.45563	4.28619e-06
0.45807	3.78479e-07	0.45807	2.70905e-06	0.45807	4.32556e-06
0.46051	3.80676e-07	0.46051	2.72644e-06	0.46051	4.36371e-06
0.46295	3.83667e-07	0.46295	2.7475e-06	0.46295	4.38477e-06
0.46539	3.86627e-07	0.46539	2.77405e-06	0.46539	4.41406e-06
0.46783	3.89069e-07	0.46783	2.78503e-06	0.46783	4.43726e-06
0.47028	3.91449e-07	0.47028	2.80121e-06	0.47028	4.46716e-06
0.47272	3.94257e-07	0.47272	2.80396e-06	0.47272	4.51172e-06
0.47516	3.97217e-07	0.47516	2.83478e-06	0.47516	4.52789e-06
0.4776	3.99506e-07	0.4776	2.84332e-06	0.4776	4.54803e-06
0.48004	4.02069e-07	0.48004	2.8656e-06	0.48004	4.56573e-06
0.48248	4.04907e-07	0.48248	2.88391e-06	0.48248	4.58923e-06
0.48492	4.07623e-07	0.48492	2.90955e-06	0.48492	4.6167e-06
0.48737	4.10095e-07	0.48737	2.9361e-06	0.48737	4.63562e-06
0.48981	4.13025e-07	0.48981	2.94586e-06	0.48981	4.67255e-06
0.49225	4.15741e-07	0.49225	2.96326e-06	0.49225	4.69635e-06
0.49469	4.18091e-07	0.49469	2.98096e-06	0.49469	4.73511e-06
0.49713	4.21173e-07	0.49713	2.99652e-06	0.49713	4.78241e-06
0.49957	4.23737e-07	0.49957	3.00629e-06	0.49957	4.82544e-06
0.50201	4.26178e-07	0.50201	3.02338e-06	0.50201	4.86877e-06
0.50446	4.29199e-07	0.50446	3.04596e-06	0.50446	4.91638e-06
0.5069	4.3222e-07	0.5069	3.06091e-06	0.5069	4.94781e-06
0.50934	4.35272e-07	0.50934	3.07983e-06	0.50934	5.00366e-06
0.51178	4.37958e-07	0.51178	3.09448e-06	0.51178	5.03326e-06
0.51422	4.40826e-07	0.51422	3.11829e-06	0.51422	5.06348e-06
0.51666	4.43451e-07	0.51666	3.14941e-06	0.51666	5.112e-06
0.5191	4.46716e-07	0.5191	3.15918e-06	0.5191	5.13123e-06
0.52155	4.49341e-07	0.52155	3.17993e-06	0.52155	5.1535e-06
0.52399	4.52667e-07	0.52399	3.18237e-06	0.52399	5.16449e-06
0.52643	4.54926e-07	0.52643	3.21136e-06	0.52643	5.17761e-06
0.52887	4.57611e-07	0.52887	3.22815e-06	0.52887	5.19836e-06
0.53131	4.60388e-07	0.53131	3.24097e-06	0.53131	5.20447e-06
0.53375	4.63348e-07	0.53375	3.26294e-06	0.53375	5.21912e-06
0.53619	4.66736e-07	0.53619	3.27789e-06	0.53619	5.24323e-06
0.53864	4.69025e-07	0.53864	3.29834e-06	0.53864	5.27679e-06
0.54108	4.72107e-07	0.54108	3.31604e-06	0.54108	5.31982e-06
0.54352	4.7525e-07	0.54352	3.32916e-06	0.54352	5.35126e-06
0.54596	4.77966e-07	0.54596	3.35663e-06	0.54596	5.39948e-06
0.5484	4.81354e-07	0.5484	3.3609e-06	0.5484	5.44922e-06
0.55084	4.84039e-07	0.55084	3.38135e-06	0.55084	5.46478e-06
0.55328	4.87e-07	0.55328	3.40546e-06	0.55328	5.47791e-06
0.55573	4.90601e-07	0.55573	3.42438e-06	0.55573	5.50995e-06
0.55817	4.93683e-07	0.55817	3.43475e-06	0.55817	5.53192e-06
0.56061	4.97009e-07	0.56061	3.46039e-06	0.56061	5.57251e-06
0.56305	5.00427e-07	0.56305	3.48053e-06	0.56305	5.60669e-06
0.56549	5.03113e-07	0.56549	3.508e-06	0.56549	5.63568e-06
0.56793	5.0647e-07	0.56793	3.51288e-06	0.56793	5.65216e-06
0.57037	5.09766e-07	0.57037	3.54919e-06	0.57037	5.67261e-06
0.57281	5.13367e-07	0.57281	3.55347e-06	0.57281	5.69794e-06
0.57526	5.15961e-07	0.57526	3.55835e-06	0.57526	5.71411e-06
0.5777	5.19714e-07	0.5777	3.59558e-06	0.5777	5.72449e-06
0.58014	5.23163e-07	0.58014	3.60901e-06	0.58014	5.74646e-06
0.58258	5.26306e-07	0.58258	3.61572e-06	0.58258	5.78217e-06
0.58502	5.29846e-07	0.58502	3.61938e-06	0.58502	5.80475e-06
0.58746	5.33661e-07	0.58746	3.65448e-06	0.58746	5.84137e-06
0.5899	5.36926e-07	0.5899	3.65723e-06	0.5899	5.88013e-06
0.59235	5.4007e-07	0.59235	3.6969e-06	0.59235	5.91461e-06
0.59479	5.44067e-07	0.59479	3.72009e-06	0.59479	5.95154e-06
0.59723	5.47882e-07	0.59723	3.71674e-06	0.59723	5.98206e-06
0.59967	5.50537e-07	0.59967	3.74786e-06	0.59967	6.008e-06
0.60211	5.54932e-07	0.60211	3.74878e-06	0.60211	6.03943e-06
0.60455	5.58563e-07	0.60455	3.78235e-06	0.60455	6.06995e-06
0.60699	5.62561e-07	0.60699	3.80585e-06	0.60699	6.07605e-06
0.60944	5.65277e-07	0.60944	3.82507e-06	0.60944	6.11572e-06
0.61188	5.69397e-07	0.61188	3.84399e-06	0.61188	6.14014e-06
0.61432	5.73578e-07	0.61432	3.86566e-06	0.61432	6.16455e-06
0.61676	5.77271e-07	0.61676	3.8913e-06	0.61676	6.20728e-06
0.6192	5.8078e-07	0.6192	3.909e-06	0.6192	6.22559e-06
0.62164	5.85022e-07	0.62164	3.92487e-06	0.62164	6.2561e-06
0.62408	5.88409e-07	0.62408	3.96057e-06	0.62408	6.27747e-06
0.62653	5.92651e-07	0.62653	3.98193e-06	0.62653	6.27747e-06
0.62897	5.96191e-07	0.62897	4.01154e-06	0.62897	6.31714e-06
0.63141	6.00525e-07	0.63141	4.01825e-06	0.63141	6.3446e-06
0.63385	6.03638e-07	0.63385	4.03503e-06	0.63385	6.36902e-06
0.63629	6.0791e-07	0.63629	4.06494e-06	0.63629	6.40259e-06
0.63873	6.11877e-07	0.63873	4.06555e-06	0.63873	6.42395e-06
0.64117	6.15234e-07	0.64117	4.09882e-06	0.64117	6.44836e-06
0.64362	6.19812e-07	0.64362	4.11377e-06	0.64362	6.49109e-06
0.64606	6.2439e-07	0.64606	4.13452e-06	0.64606	6.52466e-06
0.6485	6.27747e-07	0.6485	4.16229e-06	0.6485	6.54907e-06
0.65094	6.32629e-07	0.65094	4.18091e-06	0.65094	6.57654e-06
0.65338	6.37207e-07	0.65338	4.19495e-06	0.65338	6.61011e-06
0.65582	6.40869e-07	0.65582	4.22028e-06	0.65582	6.63147e-06
0.65826	6.45447e-07	0.65826	4.23065e-06	0.65826	6.66199e-06
0.66071	6.50024e-07	0.66071	4.24622e-06	0.66071	6.6803e-06
0.66315	6.53687e-07	0.66315	4.26819e-06	0.66315	6.71387e-06
0.66559	6.58569e-07	0.66559	4.29688e-06	0.66559	6.73218e-06
0.66803	6.63147e-07	0.66803	4.29047e-06	0.66803	6.75659e-06
0.67047	6.67419e-07	0.67047	4.31213e-06	0.67047	6.78711e-06
0.67291	6.72302e-07	0.67291	4.33441e-06	0.67291	6.80847e-06
0.67535	6.7627e-07	0.67535	4.36066e-06	0.67535	6.85425e-06
0.6778	6.81458e-07	0.6778	4.39392e-06	0.6778	6.86951e-06
0.68024	6.86035e-07	0.68024	4.40857e-06	0.68024	6.89697e-06
0.68268	6.90002e-07	0.68268	4.41284e-06	0.68268	6.93359e-06
0.68512	6.94885e-07	0.68512	4.4397e-06	0.68512	6.95496e-06
0.68756	6.98853e-07	0.68756	4.47021e-06	0.68756	7.00073e-06
0.69	7.0282e-07	0.69	4.48059e-06	0.69	7.02515e-06
0.69244	7.07703e-07	0.69244	4.50531e-06	0.69244	7.05872e-06
0.69489	7.12585e-07	0.69489	4.54956e-06	0.69489	7.07092e-06
0.69733	7.17468e-07	0.69733	4.5575e-06	0.69733	7.10144e-06
0.69977	7.21436e-07	0.69977	4.58771e-06	0.69977	7.13196e-06
0.70221	7.26624e-07	0.70221	4.59778e-06	0.70221	7.15942e-06
0.70465	7.30896e-07	0.70465	4.60541e-06	0.70465	7.19604e-06
0.70709	7.35779e-07	0.70709	4.63715e-06	0.70709	7.22046e-06
0.70953	7.40356e-07	0.70953	4.66644e-06	0.70953	7.26624e-06
0.71198	7.44629e-07	0.71198	4.67834e-06	0.71198	7.2937e-06
0.71442	7.49512e-07	0.71442	4.71985e-06	0.71442	7.33032e-06
0.71686	7.53479e-07	0.71686	4.72443e-06	0.71686	7.37e-06
0.7193	7.59277e-07	0.7193	4.74274e-06	0.7193	7.40967e-06
0.72174	7.62329e-07	0.72174	4.76837e-06	0.72174	7.45544e-06
0.72418	7.66907e-07	0.72418	4.78333e-06	0.72418	7.47681e-06
0.72662	7.71484e-07	0.72662	4.81049e-06	0.72662	7.50427e-06
0.72906	7.76978e-07	0.72906	4.82635e-06	0.72906	7.55005e-06
0.73151	7.80945e-07	0.73151	4.84436e-06	0.73151	7.58667e-06
0.73395	7.86743e-07	0.73395	4.86145e-06	0.73395	7.59888e-06
0.73639	7.901e-07	0.73639	4.8941e-06	0.73639	7.6355e-06
0.73883	7.95288e-07	0.73883	4.93195e-06	0.73883	7.65991e-06
0.74127	7.9895e-07	0.74127	4.9469e-06	0.74127	7.68738e-06
0.74371	8.03223e-07	0.74371	4.96155e-06	0.74371	7.69958e-06
0.74615	8.08411e-07	0.74615	4.98566e-06	0.74615	7.74231e-06
0.7486	8.11768e-07	0.7486	4.99939e-06	0.7486	7.77283e-06
0.75104	8.1604e-07	0.75104	5.02136e-06	0.75104	7.82776e-06
0.75348	8.21228e-07	0.75348	5.04059e-06	0.75348	7.86133e-06
0.75592	8.25195e-07	0.75592	5.0412e-06	0.75592	7.88879e-06
0.75836	8.29163e-07	0.75836	5.06653e-06	0.75836	7.92236e-06
0.7608	8.34045e-07	0.7608	5.08698e-06	0.7608	7.92847e-06
0.76324	8.38928e-07	0.76324	5.11536e-06	0.76324	7.96204e-06
0.76569	8.40759e-07	0.76569	5.12329e-06	0.76569	8.01086e-06
0.76813	8.45642e-07	0.76813	5.1593e-06	0.76813	8.05969e-06
0.77057	8.48999e-07	0.77057	5.16968e-06	0.77057	8.12073e-06
0.77301	8.54492e-07	0.77301	5.19104e-06	0.77301	8.13904e-06
0.77545	8.57544e-07	0.77545	5.21851e-06	0.77545	8.16345e-06
0.77789	8.61511e-07	0.77789	5.23682e-06	0.77789	8.19397e-06
0.78033	8.65479e-07	0.78033	5.26184e-06	0.78033	8.23364e-06
0.78278	8.69446e-07	0.78278	5.28748e-06	0.78278	8.27942e-06
0.78522	8.72498e-07	0.78522	5.30457e-06	0.78522	8.3374e-06
0.78766	8.7616e-07	0.78766	5.32104e-06	0.78766	8.3313e-06
0.7901	8.80127e-07	0.7901	5.3653e-06	0.7901	8.36792e-06
0.79254	8.83789e-07	0.79254	5.36621e-06	0.79254	8.41064e-06
0.79498	8.86536e-07	0.79498	5.38239e-06	0.79498	8.44116e-06
0.79742	8.88977e-07	0.79742	5.41321e-06	0.79742	8.50525e-06
0.79987	8.9325e-07	0.79987	5.4422e-06	0.79987	8.52051e-06
0.80231	8.97217e-07	0.80231	5.4422e-06	0.80231	8.50525e-06
0.80475	8.99963e-07	0.80475	5.47089e-06	0.80475	8.56018e-06
0.80719	9.03625e-07	0.80719	5.48676e-06	0.80719	8.61206e-06
0.80963	9.07593e-07	0.80963	5.51392e-06	0.80963	8.64258e-06
0.81207	9.10034e-07	0.81207	5.54199e-06	0.81207	8.66394e-06
0.81451	9.13696e-07	0.81451	5.5249e-06	0.81451	8.70667e-06
0.81696	9.16443e-07	0.81696	5.54932e-06	0.81696	8.71277e-06
0.8194	9.20105e-07	0.8194	5.56274e-06	0.8194	8.73718e-06
0.82184	9.22241e-07	0.82184	5.61798e-06	0.82184	8.79517e-06
0.82428	9.24988e-07	0.82428	5.64819e-06	0.82428	8.81958e-06
0.82672	9.28955e-07	0.82672	5.66132e-06	0.82672	8.85925e-06
0.82916	9.31091e-07	0.82916	5.68451e-06	0.82916	8.87146e-06
0.8316	9.35059e-07	0.8316	5.71075e-06	0.8316	8.90808e-06
0.83405	9.37805e-07	0.83405	5.71564e-06	0.83405	8.93555e-06
0.83649	9.40857e-07	0.83649	5.7312e-06	0.83649	8.95691e-06
0.83893	9.42993e-07	0.83893	5.75562e-06	0.83893	8.99353e-06
0.84137	9.4696e-07	0.84137	5.78308e-06	0.84137	9.0271e-06
0.84381	9.48181e-07	0.84381	5.78705e-06	0.84381	9.04236e-06
0.84625	9.52148e-07	0.84625	5.80841e-06	0.84625	9.06677e-06
0.84869	9.54285e-07	0.84869	5.83405e-06	0.84869	9.11255e-06
0.85114	9.57947e-07	0.85114	5.86182e-06	0.85114	9.11255e-06
0.85358	9.60999e-07	0.85358	5.87341e-06	0.85358	9.15527e-06
0.85602	9.64355e-07	0.85602	5.91187e-06	0.85602	9.198e-06
0.85846	9.66187e-07	0.85846	5.93018e-06	0.85846	9.23157e-06
0.8609	9.69543e-07	0.8609	5.94696e-06	0.8609	9.28345e-06
0.86334	9.7168e-07	0.86334	5.95947e-06	0.86334	9.31091e-06
0.86578	9.75037e-07	0.86578	5.9903e-06	0.86578	9.35669e-06
0.86823	9.78394e-07	0.86823	6.01685e-06	0.86823	9.39636e-06
0.87067	9.80835e-07	0.87067	6.03943e-06	0.87067	9.41162e-06
0.87311	9.84802e-07	0.87311	6.06079e-06	0.87311	9.41467e-06
0.87555	9.87244e-07	0.87555	6.07605e-06	0.87555	9.4574e-06
0.87799	9.8999e-07	0.87799	6.10962e-06	0.87799	9.48181e-06
0.88043	9.93652e-07	0.88043	6.10657e-06	0.88043	9.50623e-06
0.88287	9.95789e-07	0.88287	6.14014e-06	0.88287	9.56116e-06
0.88531	9.99146e-07	0.88531	6.13403e-06	0.88531	9.59778e-06
0.88776	1.00281e-06	0.88776	6.1554e-06	0.88776	9.65881e-06
0.8902	1.00647e-06	0.8902	6.16455e-06	0.8902	9.69543e-06
0.89264	1.0083e-06	0.89264	6.17371e-06	0.89264	9.74121e-06
0.89508	1.01257e-06	0.89508	6.20117e-06	0.89508	9.75342e-06
0.89752	1.01501e-06	0.89752	6.21338e-06	0.89752	9.80835e-06
0.89996	1.01898e-06	0.89996	6.22559e-06	0.89996	9.82971e-06
0.9024	1.02112e-06	0.9024	6.24695e-06	0.9024	9.87854e-06
0.90485	1.02478e-06	0.90485	6.26221e-06	0.90485	9.88464e-06
0.90729	1.02875e-06	0.90729	6.28052e-06	0.90729	9.90906e-06
0.90973	1.03333e-06	0.90973	6.26526e-06	0.90973	9.93042e-06
0.91217	1.03607e-06	0.91217	6.28052e-06	0.91217	9.94873e-06
0.91461	1.04004e-06	0.91461	6.30188e-06	0.91461	9.99451e-06
0.91705	1.0434e-06	0.91705	6.30798e-06	0.91705	1.00159e-05
0.91949	1.04706e-06	0.91949	6.3324e-06	0.91949	1.0022e-05
0.92194	1.05042e-06	0.92194	6.34766e-06	0.92194	1.00739e-05
0.92438	1.05408e-06	0.92438	6.37512e-06	0.92438	1.00891e-05
0.92682	1.05713e-06	0.92682	6.39648e-06	0.92682	1.01044e-05
0.92926	1.06293e-06	0.92926	6.39343e-06	0.92926	1.0141e-05
0.9317	1.06567e-06	0.9317	6.40259e-06	0.9317	1.01379e-05
0.93414	1.07025e-06	0.93414	6.41785e-06	0.93414	1.01471e-05
0.93658	1.07391e-06	0.93658	6.41479e-06	0.93658	1.01471e-05
0.93903	1.07849e-06	0.93903	6.43921e-06	0.93903	1.01746e-05
0.94147	1.08185e-06	0.94147	6.427e-06	0.94147	1.01868e-05
0.94391	1.08673e-06	0.94391	6.43311e-06	0.94391	1.02142e-05
0.94635	1.09009e-06	0.94635	6.44836e-06	0.94635	1.02264e-05
0.94879	1.09589e-06	0.94879	6.46362e-06	0.94879	1.02173e-05
0.95123	1.09863e-06	0.95123	6.46667e-06	0.95123	1.02631e-05
0.95367	1.10352e-06	0.95367	6.46667e-06	0.95367	1.026e-05
0.95612	1.1084e-06	0.95612	6.49719e-06	0.95612	1.02875e-05
0.95856	1.11267e-06	0.95856	6.50635e-06	0.95856	1.03271e-05
0.961	1.11633e-06	0.961	6.51855e-06	0.961	1.0318e-05
0.96344	1.12091e-06	0.96344	6.53076e-06	0.96344	1.03424e-05
0.96588	1.12518e-06	0.96588	6.5033e-06	0.96588	1.03668e-05
0.96832	1.13159e-06	0.96832	6.52771e-06	0.96832	1.03699e-05
0.97076	1.13403e-06	0.97076	6.54297e-06	0.97076	1.04004e-05
0.97321	1.13922e-06	0.97321	6.54907e-06	0.97321	1.0437e-05
0.97565	1.14471e-06	0.97565	6.57654e-06	0.97565	1.04889e-05
0.97809	1.1496e-06	0.97809	6.57349e-06	0.97809	1.05133e-05
0.98053	1.15417e-06	0.98053	6.55212e-06	0.98053	1.05377e-05
0.98297	1.15845e-06	0.98297	6.54907e-06	0.98297	1.05408e-05
0.98541	1.16302e-06	0.98541	6.55823e-06	0.98541	1.05927e-05
0.98785	1.16913e-06	0.98785	6.58875e-06	0.98785	1.06232e-05
0.9903	1.17371e-06	0.9903	6.604e-06	0.9903	1.06293e-05
0.99274	1.17828e-06	0.99274	6.63147e-06	0.99274	1.06537e-05
0.99518	1.18317e-06	0.99518	6.61621e-06	0.99518	1.07269e-05
0.99762	1.18866e-06	0.99762	6.63452e-06	0.99762	1.073e-05
1.00006	1.19354e-06	1.00006	6.64673e-06	1.00006	1.07544e-05
1.0025	1.19843e-06	1.0025	6.65588e-06	1.0025	1.07666e-05
1.00494	1.20453e-06	1.00494	6.66504e-06	1.00494	1.07849e-05
1.00739	1.21002e-06	1.00739	6.64673e-06	1.00739	1.08185e-05
1.00983	1.2146e-06	1.00983	6.64673e-06	1.00983	1.08398e-05
1.01227	1.22101e-06	1.01227	6.66809e-06	1.01227	1.08887e-05
1.01471	1.22498e-06	1.01471	6.66809e-06	1.01471	1.09039e-05
1.01715	1.23138e-06	1.01715	6.6803e-06	1.01715	1.09375e-05
1.01959	1.23535e-06	1.01959	6.67419e-06	1.01959	1.09558e-05
1.02203	1.24146e-06	1.02203	6.6864e-06	1.02203	1.09589e-05
1.02448	1.24664e-06	1.02448	6.6803e-06	1.02448	1.10138e-05
1.02692	1.25397e-06	1.02692	6.67114e-06	1.02692	1.10168e-05
1.02936	1.25732e-06	1.02936	6.6864e-06	1.02936	1.10474e-05
1.0318	1.26404e-06	1.0318	6.68945e-06	1.0318	1.1084e-05
1.03424	1.26892e-06	1.03424	6.69861e-06	1.03424	1.11023e-05
1.03668	1.27594e-06	1.03668	6.70776e-06	1.03668	1.11481e-05
1.03912	1.2793e-06	1.03912	6.70166e-06	1.03912	1.11664e-05
1.04156	1.28571e-06	1.04156	6.71387e-06	1.04156	1.11786e-05
1.04401	1.29211e-06	1.04401	6.70166e-06	1.04401	1.12427e-05
1.04645	1.29791e-06	1.04645	6.69861e-06	1.04645	1.13007e-05
1.04889	1.3031e-06	1.04889	6.69861e-06	1.04889	1.13037e-05
1.05133	1.30981e-06	1.05133	6.70471e-06	1.05133	1.1319e-05
1.05377	1.315e-06	1.05377	6.69861e-06	1.05377	1.13525e-05
1.05621	1.32111e-06	1.05621	6.72607e-06	1.05621	1.13983e-05
1.05865	1.3269e-06	1.05865	6.70471e-06	1.05865	1.14014e-05
1.0611	1.33331e-06	1.0611	6.72302e-06	1.0611	1.14227e-05
1.06354	1.33881e-06	1.06354	6.71387e-06	1.06354	1.14258e-05
1.06598	1.34491e-06	1.06598	6.72607e-06	1.06598	1.14746e-05
1.06842	1.3501e-06	1.06842	6.73218e-06	1.06842	1.15204e-05
1.07086	1.35742e-06	1.07086	6.73218e-06	1.07086	1.15082e-05
1.0733	1.36322e-06	1.0733	6.75049e-06	1.0733	1.15234e-05
1.07574	1.36902e-06	1.07574	6.7627e-06	1.07574	1.15356e-05
1.07819	1.37451e-06	1.07819	6.72913e-06	1.07819	1.15631e-05
1.08063	1.38214e-06	1.08063	6.72913e-06	1.08063	1.15509e-05
1.08307	1.38733e-06	1.08307	6.71692e-06	1.08307	1.15875e-05
1.08551	1.39435e-06	1.08551	6.71082e-06	1.08551	1.15662e-05
1.08795	1.39984e-06	1.08795	6.70776e-06	1.08795	1.15936e-05
1.09039	1.40778e-06	1.09039	6.72302e-06	1.09039	1.15936e-05
1.09283	1.41296e-06	1.09283	6.71692e-06	1.09283	1.16089e-05
1.09528	1.42029e-06	1.09528	6.72302e-06	1.09528	1.16455e-05
1.09772	1.4267e-06	1.09772	6.72607e-06	1.09772	1.16486e-05
1.10016	1.4325e-06	1.10016	6.72913e-06	1.10016	1.16638e-05
1.1026	1.44043e-06	1.1026	6.74133e-06	1.1026	1.1673e-05
1.10504	1.44714e-06	1.10504	6.75964e-06	1.10504	1.16943e-05
1.10748	1.45355e-06	1.10748	6.7627e-06	1.10748	1.17218e-05
1.10992	1.46088e-06	1.10992	6.74744e-06	1.10992	1.1731e-05
1.11237	1.46759e-06	1.11237	6.74438e-06	1.11237	1.17371e-05
1.11481	1.47614e-06	1.11481	6.75659e-06	1.11481	1.17401e-05
1.11725	1.48285e-06	1.11725	6.75354e-06	1.11725	1.17493e-05
1.11969	1.48865e-06	1.11969	6.74744e-06	1.11969	1.17737e-05
1.12213	1.49628e-06	1.12213	6.78406e-06	1.12213	1.17889e-05
1.12457	1.50482e-06	1.12457	6.7688e-06	1.12457	1.18073e-05
1.12701	1.51184e-06	1.12701	6.75354e-06	1.12701	1.18134e-05
1.12946	1.51947e-06	1.12946	6.77185e-06	1.12946	1.18469e-05
1.1319	1.5274e-06	1.1319	6.7688e-06	1.1319	1.18744e-05
1.13434	1.53564e-06	1.13434	6.7627e-06	1.13434	1.18835e-05
1.13678	1.54358e-06	1.13678	6.7749e-06	1.13678	1.18835e-05
1.13922	1.55151e-06	1.13922	6.78101e-06	1.13922	1.19263e-05
1.14166	1.56036e-06	1.14166	6.78101e-06	1.14166	1.19598e-05
1.1441	1.5686e-06	1.1441	6.78101e-06	1.1441	1.19904e-05
1.14655	1.57593e-06	1.14655	6.79626e-06	1.14655	1.19934e-05
1.14899	1.58569e-06	1.14899	6.7749e-06	1.14899	1.20361e-05
1.15143	1.59241e-06	1.15143	6.80237e-06	1.15143	1.203e-05
1.15387	1.60187e-06	1.15387	6.79626e-06	1.15387	1.20422e-05
1.15631	1.61072e-06	1.15631	6.80542e-06	1.15631	1.20728e-05
1.15875	1.62018e-06	1.15875	6.81763e-06	1.15875	1.21216e-05
1.16119	1.62842e-06	1.16119	6.82678e-06	1.16119	1.21063e-05
1.16364	1.63696e-06	1.16364	6.82068e-06	1.16364	1.21368e-05
1.16608	1.64642e-06	1.16608	6.82068e-06	1.16608	1.21582e-05
1.16852	1.65558e-06	1.16852	6.80847e-06	1.16852	1.21643e-05
1.17096	1.66565e-06	1.17096	6.82373e-06	1.17096	1.21704e-05
1.1734	1.6745e-06	1.1734	6.82373e-06	1.1734	1.2204e-05
1.17584	1.68427e-06	1.17584	6.81763e-06	1.17584	1.2207e-05
1.17828	1.69434e-06	1.17828	6.83594e-06	1.17828	1.22314e-05
1.18073	1.70441e-06	1.18073	6.82373e-06	1.18073	1.2265e-05
1.18317	1.7157e-06	1.18317	6.83899e-06	1.18317	1.22833e-05
1.18561	1.72424e-06	1.18561	6.84204e-06	1.18561	1.23108e-05
1.18805	1.73553e-06	1.18805	6.82983e-06	1.18805	1.23352e-05
1.19049	1.74561e-06	1.19049	6.83289e-06	1.19049	1.23657e-05
1.19293	1.75598e-06	1.19293	6.84509e-06	1.19293	1.23993e-05
1.19537	1.76575e-06	1.19537	6.86951e-06	1.19537	1.23871e-05
1.19781	1.77856e-06	1.19781	6.86035e-06	1.19781	1.24237e-05
1.20026	1.78925e-06	1.20026	6.8512e-06	1.20026	1.24207e-05
1.2027	1.80084e-06	1.2027	6.88171e-06	1.2027	1.24176e-05
1.20514	1.81152e-06	1.20514	6.84509e-06	1.20514	1.24207e-05
1.20758	1.82343e-06	1.20758	6.8512e-06	1.20758	1.24695e-05
1.21002	1.83502e-06	1.21002	6.84509e-06	1.21002	1.24939e-05
1.21246	1.8457e-06	1.21246	6.87866e-06	1.21246	1.25031e-05
1.2149	1.8573e-06	1.2149	6.88477e-06	1.2149	1.25122e-05
1.21735	1.86951e-06	1.21735	6.90918e-06	1.21735	1.25397e-05
1.21979	1.88171e-06	1.21979	6.90918e-06	1.21979	1.2561e-05
1.22223	1.89545e-06	1.22223	6.92749e-06	1.22223	1.25793e-05
1.22467	1.90613e-06	1.22467	6.93665e-06	1.22467	1.25885e-05
1.22711	1.91986e-06	1.22711	6.92749e-06	1.22711	1.2616e-05
1.22955	1.93146e-06	1.22955	6.94885e-06	1.22955	1.26282e-05
1.23199	1.94397e-06	1.23199	6.95801e-06	1.23199	1.26282e-05
1.23444	1.95618e-06	1.23444	6.94885e-06	1.23444	1.26404e-05
1.23688	1.97021e-06	1.23688	6.96106e-06	1.23688	1.26801e-05
1.23932	1.98303e-06	1.23932	6.96411e-06	1.23932	1.26953e-05
1.24176	1.99738e-06	1.24176	6.97327e-06	1.24176	1.27045e-05
1.2442	2.00989e-06	1.2442	6.96106e-06	1.2442	1.27472e-05
1.24664	2.02393e-06	1.24664	6.96716e-06	1.24664	1.27777e-05
1.24908	2.03735e-06	1.24908	6.99158e-06	1.24908	1.27594e-05
1.25153	2.05109e-06	1.25153	6.98242e-06	1.25153	1.27899e-05
1.25397	2.06451e-06	1.25397	6.99158e-06	1.25397	1.27869e-05
1.25641	2.07916e-06	1.25641	7.00378e-06	1.25641	1.2851e-05
1.25885	2.09259e-06	1.25885	6.99768e-06	1.25885	1.28876e-05
1.26129	2.10846e-06	1.26129	7.0282e-06	1.26129	1.29181e-05
1.26373	2.12158e-06	1.26373	7.0343e-06	1.26373	1.29669e-05
1.26617	2.13684e-06	1.26617	7.04956e-06	1.26617	1.29791e-05
1.26862	2.15118e-06	1.26862	7.04651e-06	1.26862	1.30005e-05
1.27106	2.16797e-06	1.27106	7.05261e-06	1.27106	1.30005e-05
1.2735	2.18048e-06	1.2735	7.06482e-06	1.2735	1.30524e-05
1.27594	2.19666e-06	1.27594	7.08618e-06	1.27594	1.30402e-05
1.27838	2.211e-06	1.27838	7.10449e-06	1.27838	1.30981e-05
1.28082	2.22748e-06	1.28082	7.13196e-06	1.28082	1.31042e-05
1.28326	2.24304e-06	1.28326	7.12891e-06	1.28326	1.31287e-05
1.28571	2.258e-06	1.28571	7.13501e-06	1.28571	1.31683e-05
1.28815	2.27386e-06	1.28815	7.15332e-06	1.28815	1.3205e-05
1.29059	2.29034e-06	1.29059	7.16248e-06	1.29059	1.32385e-05
1.29303	2.3056e-06	1.29303	7.16553e-06	1.29303	1.32416e-05
1.29547	2.32117e-06	1.29547	7.19299e-06	1.29547	1.32782e-05
1.29791	2.33795e-06	1.29791	7.18384e-06	1.29791	1.32233e-05
1.30035	2.35474e-06	1.30035	7.20215e-06	1.30035	1.32599e-05
1.3028	2.37061e-06	1.3028	7.23267e-06	1.3028	1.3324e-05
1.30524	2.38861e-06	1.30524	7.22656e-06	1.30524	1.33514e-05
1.30768	2.4054e-06	1.30768	7.23267e-06	1.30768	1.33362e-05
1.31012	2.42188e-06	1.31012	7.23572e-06	1.31012	1.33698e-05
1.31256	2.43805e-06	1.31256	7.26318e-06	1.31256	1.33942e-05
1.315	2.45544e-06	1.315	7.2998e-06	1.315	1.34186e-05
1.31744	2.47284e-06	1.31744	7.27539e-06	1.31744	1.34644e-05
1.31989	2.49146e-06	1.31989	7.31506e-06	1.31989	1.34705e-05
1.32233	2.50824e-06	1.32233	7.33337e-06	1.32233	1.34979e-05
1.32477	2.52655e-06	1.32477	7.32117e-06	1.32477	1.34613e-05
1.32721	2.54303e-06	1.32721	7.37e-06	1.32721	1.35223e-05
1.32965	2.56287e-06	1.32965	7.37305e-06	1.32965	1.35406e-05
1.33209	2.57996e-06	1.33209	7.37915e-06	1.33209	1.35895e-05
1.33453	2.59857e-06	1.33453	7.41882e-06	1.33453	1.36017e-05
1.33698	2.61688e-06	1.33698	7.42188e-06	1.33698	1.36139e-05
1.33942	2.6358e-06	1.33942	7.43103e-06	1.33942	1.36627e-05
1.34186	2.65442e-06	1.34186	7.44629e-06	1.34186	1.36749e-05
1.3443	2.67334e-06	1.3443	7.44019e-06	1.3443	1.36963e-05
1.34674	2.69135e-06	1.34674	7.46765e-06	1.34674	1.37695e-05
1.34918	2.71057e-06	1.34918	7.47681e-06	1.34918	1.38123e-05
1.35162	2.72858e-06	1.35162	7.49817e-06	1.35162	1.38031e-05
1.35406	2.74872e-06	1.35406	7.53784e-06	1.35406	1.38458e-05
1.35651	2.76794e-06	1.35651	7.54395e-06	1.35651	1.38458e-05
1.35895	2.78809e-06	1.35895	7.5592e-06	1.35895	1.3855e-05
1.36139	2.8064e-06	1.36139	7.547e-06	1.36139	1.39252e-05
1.36383	2.82593e-06	1.36383	7.60498e-06	1.36383	1.39404e-05
1.36627	2.84546e-06	1.36627	7.60498e-06	1.36627	1.39984e-05
1.36871	2.8653e-06	1.36871	7.61108e-06	1.36871	1.40411e-05
1.37115	2.88391e-06	1.37115	7.66602e-06	1.37115	1.40717e-05
1.3736	2.90466e-06	1.3736	7.67822e-06	1.3736	1.41327e-05
1.37604	2.9245e-06	1.37604	7.70874e-06	1.37604	1.41235e-05
1.37848	2.94373e-06	1.37848	7.72705e-06	1.37848	1.42029e-05
1.38092	2.96326e-06	1.38092	7.74536e-06	1.38092	1.42181e-05
1.38336	2.9837e-06	1.38336	7.76672e-06	1.38336	1.4267e-05
1.3858	3.00262e-06	1.3858	7.78198e-06	1.3858	1.42914e-05
1.38824	3.02399e-06	1.38824	7.80945e-06	1.38824	1.43616e-05
1.39069	3.04291e-06	1.39069	7.84302e-06	1.39069	1.43402e-05
1.39313	3.06335e-06	1.39313	7.9071e-06	1.39313	1.43463e-05
1.39557	3.0838e-06	1.39557	7.93762e-06	1.39557	1.43372e-05
1.39801	3.10455e-06	1.39801	7.93762e-06	1.39801	1.43677e-05
1.40045	3.12469e-06	1.40045	7.96814e-06	1.40045	1.44073e-05
1.40289	3.14606e-06	1.40289	8.01086e-06	1.40289	1.44196e-05
1.40533	3.1662e-06	1.40533	8.01697e-06	1.40533	1.4447e-05
1.40778	3.18573e-06	1.40778	8.04443e-06	1.40778	1.44775e-05
1.41022	3.20709e-06	1.41022	8.05969e-06	1.41022	1.44836e-05
1.41266	3.22723e-06	1.41266	8.09631e-06	1.41266	1.45294e-05
1.4151	3.2486e-06	1.4151	8.12378e-06	1.4151	1.45477e-05
1.41754	3.26904e-06	1.41754	8.12683e-06	1.41754	1.45721e-05
1.41998	3.2901e-06	1.41998	8.12988e-06	1.41998	1.45844e-05
1.42242	3.31207e-06	1.42242	8.13293e-06	1.42242	1.46088e-05
1.42487	3.33191e-06	1.42487	8.1665e-06	1.42487	1.4624e-05
1.42731	3.35358e-06	1.42731	8.1604e-06	1.42731	1.46545e-05
1.42975	3.37372e-06	1.42975	8.2428e-06	1.42975	1.46698e-05
1.43219	3.39478e-06	1.43219	8.2489e-06	1.43219	1.4682e-05
1.43463	3.41614e-06	1.43463	8.24585e-06	1.43463	1.47278e-05
1.43707	3.43811e-06	1.43707	8.27026e-06	1.43707	1.47369e-05
1.43951	3.45825e-06	1.43951	8.30383e-06	1.43951	1.47888e-05
1.44196	3.48053e-06	1.44196	8.34045e-06	1.44196	1.48468e-05
1.4444	3.50189e-06	1.4444	8.37402e-06	1.4444	1.4859e-05
1.44684	3.52386e-06	1.44684	8.40454e-06	1.44684	1.49109e-05
1.44928	3.5437e-06	1.44928	8.45947e-06	1.44928	1.49323e-05
1.45172	3.56598e-06	1.45172	8.46558e-06	1.45172	1.4978e-05
1.45416	3.58826e-06	1.45416	8.51135e-06	1.45416	1.49628e-05
1.4566	3.61115e-06	1.4566	8.55713e-06	1.4566	1.4975e-05
1.45905	3.63159e-06	1.45905	8.56628e-06	1.45905	1.49933e-05
1.46149	3.65448e-06	1.46149	8.62427e-06	1.46149	1.5036e-05
1.46393	3.67615e-06	1.46393	8.65173e-06	1.46393	1.50879e-05
1.46637	3.69995e-06	1.46637	8.64563e-06	1.46637	1.51306e-05
1.46881	3.72192e-06	1.46881	8.70667e-06	1.46881	1.5152e-05
1.47125	3.7439e-06	1.47125	8.71887e-06	1.47125	1.52191e-05
1.47369	3.76678e-06	1.47369	8.75854e-06	1.47369	1.51978e-05
1.47614	3.79089e-06	1.47614	8.76465e-06	1.47614	1.52466e-05
1.47858	3.81256e-06	1.47858	8.77686e-06	1.47858	1.52771e-05
1.48102	3.83667e-06	1.48102	8.82874e-06	1.48102	1.52924e-05
1.48346	3.85895e-06	1.48346	8.84705e-06	1.48346	1.5329e-05
1.4859	3.88214e-06	1.4859	8.84705e-06	1.4859	1.5329e-05
1.48834	3.90625e-06	1.48834	8.88062e-06	1.48834	1.53381e-05
1.49078	3.92944e-06	1.49078	8.91724e-06	1.49078	1.53595e-05
1.49323	3.95264e-06	1.49323	8.91724e-06	1.49323	1.53961e-05
1.49567	3.97675e-06	1.49567	8.94165e-06	1.49567	1.5451e-05
1.49811	4.00085e-06	1.49811	8.97522e-06	1.49811	1.54999e-05
1.50055	4.02588e-06	1.50055	9.00269e-06	1.50055	1.5509e-05

## Sheet: Figure S8(d)
-1.4975	-9.99969e-06	-1.4975	-3.38531e-05	-1.4975	-3.77899e-05
-1.49506	-1.81e-05	-1.49506	-2.97363e-05	-1.49506	-3.36243e-05
-1.49261	-1.59637e-05	-1.49261	-2.71759e-05	-1.49261	-3.09998e-05
-1.49017	-1.44836e-05	-1.49017	-2.54517e-05	-1.49017	-2.92328e-05
-1.48773	-1.33728e-05	-1.48773	-2.41516e-05	-1.48773	-2.78778e-05
-1.48529	-1.25e-05	-1.48529	-2.31323e-05	-1.48529	-2.677e-05
-1.48285	-1.17737e-05	-1.48285	-2.22626e-05	-1.48285	-2.59003e-05
-1.48041	-1.11664e-05	-1.48041	-2.15027e-05	-1.48041	-2.5177e-05
-1.47797	-1.06445e-05	-1.47797	-2.08069e-05	-1.47797	-2.44781e-05
-1.47552	-1.01868e-05	-1.47552	-2.02789e-05	-1.47552	-2.39502e-05
-1.47308	-9.77783e-06	-1.47308	-1.97418e-05	-1.47308	-2.34344e-05
-1.47064	-9.41162e-06	-1.47064	-1.92566e-05	-1.47064	-2.2937e-05
-1.4682	-9.07288e-06	-1.4682	-1.88324e-05	-1.4682	-2.24152e-05
-1.46576	-8.7738e-06	-1.46576	-1.84723e-05	-1.46576	-2.19971e-05
-1.46332	-8.49915e-06	-1.46332	-1.80725e-05	-1.46332	-2.16125e-05
-1.46088	-8.24585e-06	-1.46088	-1.77673e-05	-1.46088	-2.12097e-05
-1.45844	-8.00781e-06	-1.45844	-1.74561e-05	-1.45844	-2.07825e-05
-1.45599	-7.78809e-06	-1.45599	-1.71326e-05	-1.45599	-2.04926e-05
-1.45355	-7.58057e-06	-1.45355	-1.6864e-05	-1.45355	-2.01874e-05
-1.45111	-7.38525e-06	-1.45111	-1.65863e-05	-1.45111	-1.98975e-05
-1.44867	-7.2052e-06	-1.44867	-1.63086e-05	-1.44867	-1.94641e-05
-1.44623	-7.03125e-06	-1.44623	-1.61011e-05	-1.44623	-1.92383e-05
-1.44379	-6.86951e-06	-1.44379	-1.58905e-05	-1.44379	-1.90094e-05
-1.44135	-6.71997e-06	-1.44135	-1.56677e-05	-1.44135	-1.87592e-05
-1.4389	-6.57349e-06	-1.4389	-1.54846e-05	-1.4389	-1.8573e-05
-1.43646	-6.43311e-06	-1.43646	-1.53473e-05	-1.43646	-1.83899e-05
-1.43402	-6.29883e-06	-1.43402	-1.51825e-05	-1.43402	-1.81641e-05
-1.43158	-6.17371e-06	-1.43158	-1.50055e-05	-1.43158	-1.79871e-05
-1.42914	-6.05164e-06	-1.42914	-1.48499e-05	-1.42914	-1.78253e-05
-1.4267	-5.92651e-06	-1.4267	-1.4621e-05	-1.4267	-1.76331e-05
-1.42426	-5.8136e-06	-1.42426	-1.44806e-05	-1.42426	-1.7453e-05
-1.42181	-5.70679e-06	-1.42181	-1.43555e-05	-1.42181	-1.7392e-05
-1.41937	-5.59998e-06	-1.41937	-1.4212e-05	-1.41937	-1.72913e-05
-1.41693	-5.50232e-06	-1.41693	-1.40625e-05	-1.41693	-1.71692e-05
-1.41449	-5.40161e-06	-1.41449	-1.39343e-05	-1.41449	-1.70319e-05
-1.41205	-5.31006e-06	-1.41205	-1.37939e-05	-1.41205	-1.68732e-05
-1.40961	-5.21851e-06	-1.40961	-1.36902e-05	-1.40961	-1.66809e-05
-1.40717	-5.13e-06	-1.40717	-1.35345e-05	-1.40717	-1.65894e-05
-1.40472	-5.0415e-06	-1.40472	-1.34247e-05	-1.40472	-1.64551e-05
-1.40228	-4.95911e-06	-1.40228	-1.33118e-05	-1.40228	-1.63544e-05
-1.39984	-4.87976e-06	-1.39984	-1.31866e-05	-1.39984	-1.62109e-05
-1.3974	-4.80042e-06	-1.3974	-1.31073e-05	-1.3974	-1.61804e-05
-1.39496	-4.72412e-06	-1.39496	-1.30341e-05	-1.39496	-1.60522e-05
-1.39252	-4.65088e-06	-1.39252	-1.29395e-05	-1.39252	-1.59393e-05
-1.39008	-4.57977e-06	-1.39008	-1.27991e-05	-1.39008	-1.58173e-05
-1.38763	-4.50989e-06	-1.38763	-1.26953e-05	-1.38763	-1.56555e-05
-1.38519	-4.44183e-06	-1.38519	-1.25732e-05	-1.38519	-1.55884e-05
-1.38275	-4.37469e-06	-1.38275	-1.24695e-05	-1.38275	-1.54785e-05
-1.38031	-4.30939e-06	-1.38031	-1.23505e-05	-1.38031	-1.53687e-05
-1.37787	-4.24744e-06	-1.37787	-1.22559e-05	-1.37787	-1.52222e-05
-1.37543	-4.18488e-06	-1.37543	-1.21796e-05	-1.37543	-1.51367e-05
-1.37299	-4.12445e-06	-1.37299	-1.21002e-05	-1.37299	-1.50085e-05
-1.37054	-4.06952e-06	-1.37054	-1.20056e-05	-1.37054	-1.48895e-05
-1.3681	-4.01428e-06	-1.3681	-1.19202e-05	-1.3681	-1.4743e-05
-1.36566	-3.95691e-06	-1.36566	-1.18408e-05	-1.36566	-1.46576e-05
-1.36322	-3.90045e-06	-1.36322	-1.1792e-05	-1.36322	-1.45294e-05
-1.36078	-3.84857e-06	-1.36078	-1.17432e-05	-1.36078	-1.44165e-05
-1.35834	-3.79517e-06	-1.35834	-1.16211e-05	-1.35834	-1.43372e-05
-1.3559	-3.74207e-06	-1.3559	-1.15601e-05	-1.3559	-1.41998e-05
-1.35345	-3.69385e-06	-1.35345	-1.14929e-05	-1.35345	-1.40991e-05
-1.35101	-3.64136e-06	-1.35101	-1.14044e-05	-1.35101	-1.40656e-05
-1.34857	-3.59375e-06	-1.34857	-1.13525e-05	-1.34857	-1.39923e-05
-1.34613	-3.54645e-06	-1.34613	-1.12915e-05	-1.34613	-1.38947e-05
-1.34369	-3.50189e-06	-1.34369	-1.12335e-05	-1.34369	-1.38702e-05
-1.34125	-3.45642e-06	-1.34125	-1.11603e-05	-1.34125	-1.37543e-05
-1.33881	-3.41248e-06	-1.33881	-1.10992e-05	-1.33881	-1.36597e-05
-1.33636	-3.36884e-06	-1.33636	-1.10107e-05	-1.33636	-1.35986e-05
-1.33392	-3.32886e-06	-1.33392	-1.09314e-05	-1.33392	-1.35193e-05
-1.33148	-3.28644e-06	-1.33148	-1.08734e-05	-1.33148	-1.34796e-05
-1.32904	-3.24799e-06	-1.32904	-1.08093e-05	-1.32904	-1.33636e-05
-1.3266	-3.20709e-06	-1.3266	-1.07239e-05	-1.3266	-1.32507e-05
-1.32416	-3.16864e-06	-1.32416	-1.06598e-05	-1.32416	-1.31622e-05
-1.32172	-3.12866e-06	-1.32172	-1.0614e-05	-1.32172	-1.31073e-05
-1.31927	-3.09143e-06	-1.31927	-1.05316e-05	-1.31927	-1.30432e-05
-1.31683	-3.05237e-06	-1.31683	-1.0498e-05	-1.31683	-1.29395e-05
-1.31439	-3.01575e-06	-1.31439	-1.04187e-05	-1.31439	-1.28876e-05
-1.31195	-2.97913e-06	-1.31195	-1.03638e-05	-1.31195	-1.27716e-05
-1.30951	-2.94556e-06	-1.30951	-1.03271e-05	-1.30951	-1.27228e-05
-1.30707	-2.90985e-06	-1.30707	-1.02661e-05	-1.30707	-1.26587e-05
-1.30463	-2.8772e-06	-1.30463	-1.02234e-05	-1.30463	-1.26068e-05
-1.30219	-2.84424e-06	-1.30219	-1.01746e-05	-1.30219	-1.25366e-05
-1.29974	-2.81158e-06	-1.29974	-1.01105e-05	-1.29974	-1.24481e-05
-1.2973	-2.77771e-06	-1.2973	-1.01013e-05	-1.2973	-1.24329e-05
-1.29486	-2.74719e-06	-1.29486	-1.00189e-05	-1.29486	-1.23474e-05
-1.29242	-2.71515e-06	-1.29242	-9.9762e-06	-1.29242	-1.2265e-05
-1.28998	-2.68372e-06	-1.28998	-9.8938e-06	-1.28998	-1.22131e-05
-1.28754	-2.65381e-06	-1.28754	-9.83582e-06	-1.28754	-1.21552e-05
-1.2851	-2.62543e-06	-1.2851	-9.77783e-06	-1.2851	-1.21185e-05
-1.28265	-2.59583e-06	-1.28265	-9.729e-06	-1.28265	-1.20575e-05
-1.28021	-2.56714e-06	-1.28021	-9.66492e-06	-1.28021	-1.19507e-05
-1.27777	-2.53906e-06	-1.27777	-9.60693e-06	-1.27777	-1.19019e-05
-1.27533	-2.51251e-06	-1.27533	-9.57947e-06	-1.27533	-1.18408e-05
-1.27289	-2.48566e-06	-1.27289	-9.51538e-06	-1.27289	-1.17889e-05
-1.27045	-2.45911e-06	-1.27045	-9.48181e-06	-1.27045	-1.17096e-05
-1.26801	-2.43256e-06	-1.26801	-9.43909e-06	-1.26801	-1.16913e-05
-1.26556	-2.40692e-06	-1.26556	-9.39941e-06	-1.26556	-1.16577e-05
-1.26312	-2.3822e-06	-1.26312	-9.32922e-06	-1.26312	-1.1618e-05
-1.26068	-2.35626e-06	-1.26068	-9.30786e-06	-1.26068	-1.15601e-05
-1.25824	-2.33002e-06	-1.25824	-9.27734e-06	-1.25824	-1.15173e-05
-1.2558	-2.30621e-06	-1.2558	-9.23462e-06	-1.2558	-1.1496e-05
-1.25336	-2.28149e-06	-1.25336	-9.21021e-06	-1.25336	-1.14502e-05
-1.25092	-2.25922e-06	-1.25092	-9.17053e-06	-1.25092	-1.13739e-05
-1.24847	-2.23541e-06	-1.24847	-9.14917e-06	-1.24847	-1.13586e-05
-1.24603	-2.21252e-06	-1.24603	-9.09119e-06	-1.24603	-1.13098e-05
-1.24359	-2.18903e-06	-1.24359	-9.04846e-06	-1.24359	-1.12366e-05
-1.24115	-2.16766e-06	-1.24115	-8.99963e-06	-1.24115	-1.11847e-05
-1.23871	-2.14691e-06	-1.23871	-8.9447e-06	-1.23871	-1.11328e-05
-1.23627	-2.12646e-06	-1.23627	-8.91113e-06	-1.23627	-1.10504e-05
-1.23383	-2.10327e-06	-1.23383	-8.82568e-06	-1.23383	-1.10321e-05
-1.23138	-2.08374e-06	-1.23138	-8.78906e-06	-1.23138	-1.09558e-05
-1.22894	-2.06116e-06	-1.22894	-8.75854e-06	-1.22894	-1.09253e-05
-1.2265	-2.04163e-06	-1.2265	-8.72498e-06	-1.2265	-1.0849e-05
-1.22406	-2.02209e-06	-1.22406	-8.6731e-06	-1.22406	-1.0788e-05
-1.22162	-2.00165e-06	-1.22162	-8.64563e-06	-1.22162	-1.07758e-05
-1.21918	-1.98273e-06	-1.21918	-8.6731e-06	-1.21918	-1.07422e-05
-1.21674	-1.96381e-06	-1.21674	-8.66394e-06	-1.21674	-1.07056e-05
-1.21429	-1.94427e-06	-1.21429	-8.61511e-06	-1.21429	-1.0614e-05
-1.21185	-1.92688e-06	-1.21185	-8.57544e-06	-1.21185	-1.06018e-05
-1.20941	-1.90826e-06	-1.20941	-8.5144e-06	-1.20941	-1.05621e-05
-1.20697	-1.88995e-06	-1.20697	-8.47168e-06	-1.20697	-1.05499e-05
-1.20453	-1.87286e-06	-1.20453	-8.44421e-06	-1.20453	-1.05194e-05
-1.20209	-1.85516e-06	-1.20209	-8.41064e-06	-1.20209	-1.05042e-05
-1.19965	-1.83929e-06	-1.19965	-8.38318e-06	-1.19965	-1.04492e-05
-1.1972	-1.82098e-06	-1.1972	-8.36487e-06	-1.1972	-1.04156e-05
-1.19476	-1.8045e-06	-1.19476	-8.29773e-06	-1.19476	-1.03851e-05
-1.19232	-1.78741e-06	-1.19232	-8.28552e-06	-1.19232	-1.03088e-05
-1.18988	-1.77124e-06	-1.18988	-8.25195e-06	-1.18988	-1.026e-05
-1.18744	-1.75568e-06	-1.18744	-8.21533e-06	-1.18744	-1.02631e-05
-1.185	-1.7392e-06	-1.185	-8.18176e-06	-1.185	-1.0257e-05
-1.18256	-1.72394e-06	-1.18256	-8.16345e-06	-1.18256	-1.02386e-05
-1.18011	-1.70807e-06	-1.18011	-8.12378e-06	-1.18011	-1.01379e-05
-1.17767	-1.69312e-06	-1.17767	-8.08105e-06	-1.17767	-1.01227e-05
-1.17523	-1.67847e-06	-1.17523	-8.04138e-06	-1.17523	-1.00983e-05
-1.17279	-1.66351e-06	-1.17279	-8.02612e-06	-1.17279	-1.00525e-05
-1.17035	-1.64948e-06	-1.17035	-7.97119e-06	-1.17035	-1.0022e-05
-1.16791	-1.63513e-06	-1.16791	-7.95593e-06	-1.16791	-9.9823e-06
-1.16547	-1.6214e-06	-1.16547	-7.94983e-06	-1.16547	-9.92126e-06
-1.16302	-1.60736e-06	-1.16302	-7.90405e-06	-1.16302	-9.8938e-06
-1.16058	-1.59363e-06	-1.16058	-7.84302e-06	-1.16058	-9.86023e-06
-1.15814	-1.5799e-06	-1.15814	-7.82776e-06	-1.15814	-9.85107e-06
-1.1557	-1.56677e-06	-1.1557	-7.77588e-06	-1.1557	-9.79919e-06
-1.15326	-1.55365e-06	-1.15326	-7.724e-06	-1.15326	-9.78394e-06
-1.15082	-1.54175e-06	-1.15082	-7.68738e-06	-1.15082	-9.71375e-06
-1.14838	-1.53076e-06	-1.14838	-7.65991e-06	-1.14838	-9.71375e-06
-1.14594	-1.51733e-06	-1.14594	-7.63245e-06	-1.14594	-9.65271e-06
-1.14349	-1.50574e-06	-1.14349	-7.59583e-06	-1.14349	-9.61914e-06
-1.14105	-1.49414e-06	-1.14105	-7.56836e-06	-1.14105	-9.61609e-06
-1.13861	-1.48163e-06	-1.13861	-7.51953e-06	-1.13861	-9.56116e-06
-1.13617	-1.46942e-06	-1.13617	-7.49512e-06	-1.13617	-9.53979e-06
-1.13373	-1.45996e-06	-1.13373	-7.4707e-06	-1.13373	-9.51843e-06
-1.13129	-1.44745e-06	-1.13129	-7.43408e-06	-1.13129	-9.49097e-06
-1.12885	-1.43616e-06	-1.12885	-7.43408e-06	-1.12885	-9.46655e-06
-1.1264	-1.42578e-06	-1.1264	-7.39441e-06	-1.1264	-9.43909e-06
-1.12396	-1.41449e-06	-1.12396	-7.35168e-06	-1.12396	-9.39331e-06
-1.12152	-1.40228e-06	-1.12152	-7.31506e-06	-1.12152	-9.32617e-06
-1.11908	-1.39343e-06	-1.11908	-7.25403e-06	-1.11908	-9.32312e-06
-1.11664	-1.38306e-06	-1.11664	-7.23572e-06	-1.11664	-9.31091e-06
-1.1142	-1.3736e-06	-1.1142	-7.20215e-06	-1.1142	-9.26208e-06
-1.11176	-1.36169e-06	-1.11176	-7.16553e-06	-1.11176	-9.24683e-06
-1.10931	-1.35376e-06	-1.10931	-7.12891e-06	-1.10931	-9.20715e-06
-1.10687	-1.34399e-06	-1.10687	-7.13196e-06	-1.10687	-9.25293e-06
-1.10443	-1.33453e-06	-1.10443	-7.12891e-06	-1.10443	-9.18884e-06
-1.10199	-1.32416e-06	-1.10199	-7.11975e-06	-1.10199	-9.15833e-06
-1.09955	-1.31561e-06	-1.09955	-7.09229e-06	-1.09955	-9.10339e-06
-1.09711	-1.30463e-06	-1.09711	-7.05872e-06	-1.09711	-9.06677e-06
-1.09467	-1.29639e-06	-1.09467	-7.01599e-06	-1.09467	-9.05151e-06
-1.09222	-1.28815e-06	-1.09222	-6.99158e-06	-1.09222	-9.0332e-06
-1.08978	-1.27869e-06	-1.08978	-6.96106e-06	-1.08978	-8.98438e-06
-1.08734	-1.27014e-06	-1.08734	-6.94885e-06	-1.08734	-8.99048e-06
-1.0849	-1.26099e-06	-1.0849	-6.90002e-06	-1.0849	-8.97217e-06
-1.08246	-1.25305e-06	-1.08246	-6.86951e-06	-1.08246	-8.95081e-06
-1.08002	-1.24481e-06	-1.08002	-6.8512e-06	-1.08002	-8.93555e-06
-1.07758	-1.23566e-06	-1.07758	-6.82068e-06	-1.07758	-8.90808e-06
-1.07513	-1.22833e-06	-1.07513	-6.82068e-06	-1.07513	-8.84399e-06
-1.07269	-1.21918e-06	-1.07269	-6.78406e-06	-1.07269	-8.82263e-06
-1.07025	-1.21033e-06	-1.07025	-6.79016e-06	-1.07025	-8.80737e-06
-1.06781	-1.2027e-06	-1.06781	-6.75354e-06	-1.06781	-8.79517e-06
-1.06537	-1.19507e-06	-1.06537	-6.72913e-06	-1.06537	-8.79211e-06
-1.06293	-1.18713e-06	-1.06293	-6.70166e-06	-1.06293	-8.75549e-06
-1.06049	-1.18042e-06	-1.06049	-6.70471e-06	-1.06049	-8.79211e-06
-1.05804	-1.17157e-06	-1.05804	-6.6925e-06	-1.05804	-8.77075e-06
-1.0556	-1.16486e-06	-1.0556	-6.65588e-06	-1.0556	-8.73108e-06
-1.05316	-1.15814e-06	-1.05316	-6.66809e-06	-1.05316	-8.73108e-06
-1.05072	-1.1496e-06	-1.05072	-6.62842e-06	-1.05072	-8.70056e-06
-1.04828	-1.14319e-06	-1.04828	-6.61316e-06	-1.04828	-8.65784e-06
-1.04584	-1.13525e-06	-1.04584	-6.58569e-06	-1.04584	-8.66089e-06
-1.0434	-1.12732e-06	-1.0434	-6.53992e-06	-1.0434	-8.65784e-06
-1.04095	-1.12122e-06	-1.04095	-6.57959e-06	-1.04095	-8.61816e-06
-1.03851	-1.11511e-06	-1.03851	-6.54907e-06	-1.03851	-8.5968e-06
-1.03607	-1.1087e-06	-1.03607	-6.52161e-06	-1.03607	-8.55713e-06
-1.03363	-1.10199e-06	-1.03363	-6.5094e-06	-1.03363	-8.55103e-06
-1.03119	-1.09375e-06	-1.03119	-6.50024e-06	-1.03119	-8.55713e-06
-1.02875	-1.08734e-06	-1.02875	-6.47278e-06	-1.02875	-8.52356e-06
-1.02631	-1.07971e-06	-1.02631	-6.44836e-06	-1.02631	-8.51135e-06
-1.02386	-1.07391e-06	-1.02386	-6.44226e-06	-1.02386	-8.5022e-06
-1.02142	-1.06812e-06	-1.02142	-6.40869e-06	-1.02142	-8.48999e-06
-1.01898	-1.06049e-06	-1.01898	-6.39343e-06	-1.01898	-8.43811e-06
-1.01654	-1.05469e-06	-1.01654	-6.36902e-06	-1.01654	-8.41064e-06
-1.0141	-1.04919e-06	-1.0141	-6.32935e-06	-1.0141	-8.38013e-06
-1.01166	-1.04156e-06	-1.01166	-6.31104e-06	-1.01166	-8.36182e-06
-1.00922	-1.03607e-06	-1.00922	-6.28662e-06	-1.00922	-8.30994e-06
-1.00677	-1.02875e-06	-1.00677	-6.26831e-06	-1.00677	-8.30078e-06
-1.00433	-1.02386e-06	-1.00433	-6.25305e-06	-1.00433	-8.24585e-06
-1.00189	-1.01654e-06	-1.00189	-6.20728e-06	-1.00189	-8.26721e-06
-0.99945	-1.01074e-06	-0.99945	-6.19507e-06	-0.99945	-8.2489e-06
-0.99701	-1.00494e-06	-0.99701	-6.19202e-06	-0.99701	-8.21838e-06
-0.99457	-9.99146e-07	-0.99457	-6.14929e-06	-0.99457	-8.19397e-06
-0.99213	-9.93042e-07	-0.99213	-6.13403e-06	-0.99213	-8.18787e-06
-0.98969	-9.87549e-07	-0.98969	-6.09741e-06	-0.98969	-8.13904e-06
-0.98724	-9.81445e-07	-0.98724	-6.05469e-06	-0.98724	-8.11157e-06
-0.9848	-9.75037e-07	-0.9848	-6.03333e-06	-0.9848	-8.08411e-06
-0.98236	-9.69543e-07	-0.98236	-6.01196e-06	-0.98236	-8.02917e-06
-0.97992	-9.63745e-07	-0.97992	-5.99976e-06	-0.97992	-7.9834e-06
-0.97748	-9.57947e-07	-0.97748	-5.97839e-06	-0.97748	-7.9834e-06
-0.97504	-9.53369e-07	-0.97504	-5.95398e-06	-0.97504	-7.95593e-06
-0.9726	-9.48181e-07	-0.9726	-5.92041e-06	-0.9726	-7.91321e-06
-0.97015	-9.41772e-07	-0.97015	-5.88989e-06	-0.97015	-7.88879e-06
-0.96771	-9.35669e-07	-0.96771	-5.87158e-06	-0.96771	-7.87659e-06
-0.96527	-9.32007e-07	-0.96527	-5.83191e-06	-0.96527	-7.83386e-06
-0.96283	-9.26514e-07	-0.96283	-5.8197e-06	-0.96283	-7.85522e-06
-0.96039	-9.198e-07	-0.96039	-5.78308e-06	-0.96039	-7.84302e-06
-0.95795	-9.15833e-07	-0.95795	-5.7373e-06	-0.95795	-7.83386e-06
-0.95551	-9.09424e-07	-0.95551	-5.72205e-06	-0.95551	-7.81555e-06
-0.95306	-9.04541e-07	-0.95306	-5.71594e-06	-0.95306	-7.81555e-06
-0.95062	-8.99353e-07	-0.95062	-5.68237e-06	-0.95062	-7.80945e-06
-0.94818	-8.9325e-07	-0.94818	-5.66406e-06	-0.94818	-7.8186e-06
-0.94574	-8.89282e-07	-0.94574	-5.67322e-06	-0.94574	-7.80334e-06
-0.9433	-8.84399e-07	-0.9433	-5.66406e-06	-0.9433	-7.76062e-06
-0.94086	-8.78906e-07	-0.94086	-5.6366e-06	-0.94086	-7.76978e-06
-0.93842	-8.74329e-07	-0.93842	-5.6366e-06	-0.93842	-7.75757e-06
-0.93597	-8.69446e-07	-0.93597	-5.62744e-06	-0.93597	-7.80945e-06
-0.93353	-8.63953e-07	-0.93353	-5.57861e-06	-0.93353	-7.76978e-06
-0.93109	-8.5968e-07	-0.93109	-5.55115e-06	-0.93109	-7.76062e-06
-0.92865	-8.55408e-07	-0.92865	-5.53284e-06	-0.92865	-7.69958e-06
-0.92621	-8.49304e-07	-0.92621	-5.50842e-06	-0.92621	-7.66907e-06
-0.92377	-8.45032e-07	-0.92377	-5.49011e-06	-0.92377	-7.65686e-06
-0.92133	-8.39539e-07	-0.92133	-5.45959e-06	-0.92133	-7.61414e-06
-0.91888	-8.34656e-07	-0.91888	-5.44739e-06	-0.91888	-7.60498e-06
-0.91644	-8.30383e-07	-0.91644	-5.41382e-06	-0.91644	-7.56836e-06
-0.914	-8.255e-07	-0.914	-5.39246e-06	-0.914	-7.53174e-06
-0.91156	-8.20618e-07	-0.91156	-5.35583e-06	-0.91156	-7.50427e-06
-0.90912	-8.16345e-07	-0.90912	-5.32227e-06	-0.90912	-7.47681e-06
-0.90668	-8.10852e-07	-0.90668	-5.3009e-06	-0.90668	-7.40356e-06
-0.90424	-8.0658e-07	-0.90424	-5.29785e-06	-0.90424	-7.3761e-06
-0.90179	-8.02002e-07	-0.90179	-5.27649e-06	-0.90179	-7.33337e-06
-0.89935	-7.97424e-07	-0.89935	-5.27039e-06	-0.89935	-7.29065e-06
-0.89691	-7.93152e-07	-0.89691	-5.27039e-06	-0.89691	-7.26929e-06
-0.89447	-7.87964e-07	-0.89447	-5.24292e-06	-0.89447	-7.22656e-06
-0.89203	-7.82166e-07	-0.89203	-5.2124e-06	-0.89203	-7.2052e-06
-0.88959	-7.78809e-07	-0.88959	-5.2002e-06	-0.88959	-7.18994e-06
-0.88715	-7.74536e-07	-0.88715	-5.19104e-06	-0.88715	-7.18384e-06
-0.8847	-7.69958e-07	-0.8847	-5.16663e-06	-0.8847	-7.14722e-06
-0.88226	-7.64465e-07	-0.88226	-5.16052e-06	-0.88226	-7.12585e-06
-0.87982	-7.60193e-07	-0.87982	-5.13611e-06	-0.87982	-7.09839e-06
-0.87738	-7.54395e-07	-0.87738	-5.1178e-06	-0.87738	-7.06482e-06
-0.87494	-7.51343e-07	-0.87494	-5.1178e-06	-0.87494	-7.08313e-06
-0.8725	-7.47375e-07	-0.8725	-5.07813e-06	-0.8725	-7.02515e-06
-0.87006	-7.40662e-07	-0.87006	-5.06287e-06	-0.87006	-7.00073e-06
-0.86761	-7.36694e-07	-0.86761	-5.05676e-06	-0.86761	-6.97632e-06
-0.86517	-7.32727e-07	-0.86517	-5.02014e-06	-0.86517	-6.93665e-06
-0.86273	-7.28455e-07	-0.86273	-4.99268e-06	-0.86273	-6.95801e-06
-0.86029	-7.23877e-07	-0.86029	-4.98352e-06	-0.86029	-6.96106e-06
-0.85785	-7.19299e-07	-0.85785	-4.96216e-06	-0.85785	-6.9397e-06
-0.85541	-7.15027e-07	-0.85541	-4.93164e-06	-0.85541	-6.92749e-06
-0.85297	-7.09839e-07	-0.85297	-4.92859e-06	-0.85297	-6.88782e-06
-0.85052	-7.05261e-07	-0.85052	-4.92004e-06	-0.85052	-6.84814e-06
-0.84808	-7.01904e-07	-0.84808	-4.88312e-06	-0.84808	-6.82678e-06
-0.84564	-6.98242e-07	-0.84564	-4.86298e-06	-0.84564	-6.79932e-06
-0.8432	-6.92444e-07	-0.8432	-4.83185e-06	-0.8432	-6.77185e-06
-0.84076	-6.87561e-07	-0.84076	-4.79919e-06	-0.84076	-6.74438e-06
-0.83832	-6.82983e-07	-0.83832	-4.79584e-06	-0.83832	-6.70776e-06
-0.83588	-6.79016e-07	-0.83588	-4.78912e-06	-0.83588	-6.69861e-06
-0.83344	-6.75049e-07	-0.83344	-4.75891e-06	-0.83344	-6.67419e-06
-0.83099	-6.70776e-07	-0.83099	-4.74792e-06	-0.83099	-6.6925e-06
-0.82855	-6.66199e-07	-0.82855	-4.71924e-06	-0.82855	-6.65283e-06
-0.82611	-6.62537e-07	-0.82611	-4.69269e-06	-0.82611	-6.61926e-06
-0.82367	-6.57959e-07	-0.82367	-4.67621e-06	-0.82367	-6.60706e-06
-0.82123	-6.53076e-07	-0.82123	-4.64539e-06	-0.82123	-6.58875e-06
-0.81879	-6.5033e-07	-0.81879	-4.60388e-06	-0.81879	-6.60095e-06
-0.81635	-6.45447e-07	-0.81635	-4.60205e-06	-0.81635	-6.54602e-06
-0.8139	-6.41174e-07	-0.8139	-4.55933e-06	-0.8139	-6.52466e-06
-0.81146	-6.37207e-07	-0.81146	-4.5401e-06	-0.81146	-6.5094e-06
-0.80902	-6.32935e-07	-0.80902	-4.52667e-06	-0.80902	-6.46973e-06
-0.80658	-6.28662e-07	-0.80658	-4.48486e-06	-0.80658	-6.45752e-06
-0.80414	-6.24084e-07	-0.80414	-4.47906e-06	-0.80414	-6.41174e-06
-0.8017	-6.20728e-07	-0.8017	-4.45679e-06	-0.8017	-6.36292e-06
-0.79926	-6.16455e-07	-0.79926	-4.43634e-06	-0.79926	-6.35376e-06
-0.79681	-6.12488e-07	-0.79681	-4.41956e-06	-0.79681	-6.30798e-06
-0.79437	-6.08826e-07	-0.79437	-4.40552e-06	-0.79437	-6.30188e-06
-0.79193	-6.04248e-07	-0.79193	-4.38385e-06	-0.79193	-6.27747e-06
-0.78949	-6.00586e-07	-0.78949	-4.36096e-06	-0.78949	-6.21948e-06
-0.78705	-5.96008e-07	-0.78705	-4.33197e-06	-0.78705	-6.19507e-06
-0.78461	-5.92651e-07	-0.78461	-4.31458e-06	-0.78461	-6.18896e-06
-0.78217	-5.88684e-07	-0.78217	-4.3045e-06	-0.78217	-6.16455e-06
-0.77972	-5.83801e-07	-0.77972	-4.27979e-06	-0.77972	-6.17371e-06
-0.77728	-5.79834e-07	-0.77728	-4.27338e-06	-0.77728	-6.12183e-06
-0.77484	-5.76477e-07	-0.77484	-4.25568e-06	-0.77484	-6.11267e-06
-0.7724	-5.72205e-07	-0.7724	-4.22394e-06	-0.7724	-6.09741e-06
-0.76996	-5.67627e-07	-0.76996	-4.22058e-06	-0.76996	-6.10962e-06
-0.76752	-5.6366e-07	-0.76752	-4.18518e-06	-0.76752	-6.08215e-06
-0.76508	-5.58167e-07	-0.76508	-4.15558e-06	-0.76508	-6.06384e-06
-0.76263	-5.53589e-07	-0.76263	-4.13544e-06	-0.76263	-6.06995e-06
-0.76019	-5.49622e-07	-0.76019	-4.11621e-06	-0.76019	-6.08215e-06
-0.75775	-5.46265e-07	-0.75775	-4.08386e-06	-0.75775	-6.06079e-06
-0.75531	-5.42297e-07	-0.75531	-4.09576e-06	-0.75531	-6.05164e-06
-0.75287	-5.37109e-07	-0.75287	-4.06494e-06	-0.75287	-6.00281e-06
-0.75043	-5.33752e-07	-0.75043	-4.04724e-06	-0.75043	-6.00281e-06
-0.74799	-5.28564e-07	-0.74799	-4.02435e-06	-0.74799	-5.98145e-06
-0.74554	-5.24292e-07	-0.74554	-4.00787e-06	-0.74554	-5.94482e-06
-0.7431	-5.2002e-07	-0.7431	-4.00208e-06	-0.7431	-5.94177e-06
-0.74066	-5.16052e-07	-0.74066	-3.98102e-06	-0.74066	-5.92957e-06
-0.73822	-5.11475e-07	-0.73822	-3.96088e-06	-0.73822	-5.88379e-06
-0.73578	-5.07507e-07	-0.73578	-3.95081e-06	-0.73578	-5.85632e-06
-0.73334	-5.0354e-07	-0.73334	-3.92822e-06	-0.73334	-5.83496e-06
-0.7309	-4.98962e-07	-0.7309	-3.9212e-06	-0.7309	-5.82275e-06
-0.72845	-4.94995e-07	-0.72845	-3.88733e-06	-0.72845	-5.80444e-06
-0.72601	-4.89502e-07	-0.72601	-3.8858e-06	-0.72601	-5.78613e-06
-0.72357	-4.87366e-07	-0.72357	-3.85406e-06	-0.72357	-5.74951e-06
-0.72113	-4.81262e-07	-0.72113	-3.84949e-06	-0.72113	-5.71594e-06
-0.71869	-4.76868e-07	-0.71869	-3.8266e-06	-0.71869	-5.68848e-06
-0.71625	-4.72473e-07	-0.71625	-3.81165e-06	-0.71625	-5.6488e-06
-0.71381	-4.68231e-07	-0.71381	-3.80341e-06	-0.71381	-5.63049e-06
-0.71136	-4.64081e-07	-0.71136	-3.77899e-06	-0.71136	-5.59692e-06
-0.70892	-4.60266e-07	-0.70892	-3.75183e-06	-0.70892	-5.58777e-06
-0.70648	-4.5578e-07	-0.70648	-3.7149e-06	-0.70648	-5.55725e-06
-0.70404	-4.51355e-07	-0.70404	-3.69141e-06	-0.70404	-5.53589e-06
-0.7016	-4.47418e-07	-0.7016	-3.68744e-06	-0.7016	-5.50232e-06
-0.69916	-4.42719e-07	-0.69916	-3.67065e-06	-0.69916	-5.49927e-06
-0.69672	-4.38751e-07	-0.69672	-3.66852e-06	-0.69672	-5.45349e-06
-0.69427	-4.34906e-07	-0.69427	-3.64929e-06	-0.69427	-5.42603e-06
-0.69183	-4.30542e-07	-0.69183	-3.62091e-06	-0.69183	-5.42603e-06
-0.68939	-4.26361e-07	-0.68939	-3.60382e-06	-0.68939	-5.41382e-06
-0.68695	-4.21722e-07	-0.68695	-3.5907e-06	-0.68695	-5.3772e-06
-0.68451	-4.19434e-07	-0.68451	-3.5553e-06	-0.68451	-5.36194e-06
-0.68207	-4.14246e-07	-0.68207	-3.52661e-06	-0.68207	-5.32532e-06
-0.67963	-4.10217e-07	-0.67963	-3.52722e-06	-0.67963	-5.30701e-06
-0.67719	-4.07288e-07	-0.67719	-3.51074e-06	-0.67719	-5.28259e-06
-0.67474	-4.02588e-07	-0.67474	-3.50372e-06	-0.67474	-5.25513e-06
-0.6723	-3.98773e-07	-0.6723	-3.47809e-06	-0.6723	-5.22766e-06
-0.66986	-3.9502e-07	-0.66986	-3.44635e-06	-0.66986	-5.23682e-06
-0.66742	-3.91113e-07	-0.66742	-3.43201e-06	-0.66742	-5.18799e-06
-0.66498	-3.87604e-07	-0.66498	-3.40851e-06	-0.66498	-5.17883e-06
-0.66254	-3.82813e-07	-0.66254	-3.39325e-06	-0.66254	-5.16968e-06
-0.6601	-3.79242e-07	-0.6601	-3.37769e-06	-0.6601	-5.14526e-06
-0.65765	-3.74756e-07	-0.65765	-3.37524e-06	-0.65765	-5.12085e-06
-0.65521	-3.71338e-07	-0.65521	-3.34808e-06	-0.65521	-5.09949e-06
-0.65277	-3.67493e-07	-0.65277	-3.33588e-06	-0.65277	-5.04761e-06
-0.65033	-3.638e-07	-0.65033	-3.3136e-06	-0.65033	-5.04761e-06
-0.64789	-3.59833e-07	-0.64789	-3.30322e-06	-0.64789	-5.01099e-06
-0.64545	-3.55652e-07	-0.64545	-3.28827e-06	-0.64545	-5.00793e-06
-0.64301	-3.52448e-07	-0.64301	-3.27515e-06	-0.64301	-4.95911e-06
-0.64056	-3.48358e-07	-0.64056	-3.2486e-06	-0.64056	-4.953e-06
-0.63812	-3.44574e-07	-0.63812	-3.23273e-06	-0.63812	-4.91638e-06
-0.63568	-3.4082e-07	-0.63568	-3.22876e-06	-0.63568	-4.88281e-06
-0.63324	-3.37189e-07	-0.63324	-3.2016e-06	-0.63324	-4.8584e-06
-0.6308	-3.34137e-07	-0.6308	-3.18756e-06	-0.6308	-4.83246e-06
-0.62836	-3.30566e-07	-0.62836	-3.16681e-06	-0.62836	-4.84558e-06
-0.62592	-3.27393e-07	-0.62592	-3.16345e-06	-0.62592	-4.79401e-06
-0.62347	-3.23212e-07	-0.62347	-3.13354e-06	-0.62347	-4.76959e-06
-0.62103	-3.19824e-07	-0.62103	-3.13599e-06	-0.62103	-4.74609e-06
-0.61859	-3.1665e-07	-0.61859	-3.12103e-06	-0.61859	-4.73083e-06
-0.61615	-3.13019e-07	-0.61615	-3.0954e-06	-0.61615	-4.70184e-06
-0.61371	-3.08716e-07	-0.61371	-3.07953e-06	-0.61371	-4.67072e-06
-0.61127	-3.05695e-07	-0.61127	-3.04962e-06	-0.61127	-4.64172e-06
-0.60883	-3.02368e-07	-0.60883	-3.04291e-06	-0.60883	-4.61975e-06
-0.60638	-2.99133e-07	-0.60638	-3.00873e-06	-0.60638	-4.59778e-06
-0.60394	-2.95074e-07	-0.60394	-3.01086e-06	-0.60394	-4.58313e-06
-0.6015	-2.9187e-07	-0.6015	-2.98157e-06	-0.6015	-4.5697e-06
-0.59906	-2.88513e-07	-0.59906	-2.966e-06	-0.59906	-4.54254e-06
-0.59662	-2.84912e-07	-0.59662	-2.94952e-06	-0.59662	-4.53644e-06
-0.59418	-2.81891e-07	-0.59418	-2.95227e-06	-0.59418	-4.51935e-06
-0.59174	-2.78961e-07	-0.59174	-2.9187e-06	-0.59174	-4.48181e-06
-0.58929	-2.75177e-07	-0.58929	-2.92297e-06	-0.58929	-4.49829e-06
-0.58685	-2.72797e-07	-0.58685	-2.91687e-06	-0.58685	-4.46564e-06
-0.58441	-2.68646e-07	-0.58441	-2.901e-06	-0.58441	-4.4519e-06
-0.58197	-2.65625e-07	-0.58197	-2.86316e-06	-0.58197	-4.44794e-06
-0.57953	-2.62695e-07	-0.57953	-2.83875e-06	-0.57953	-4.41711e-06
-0.57709	-2.59613e-07	-0.57709	-2.83691e-06	-0.57709	-4.40704e-06
-0.57465	-2.56622e-07	-0.57465	-2.81219e-06	-0.57465	-4.38354e-06
-0.5722	-2.53204e-07	-0.5722	-2.80396e-06	-0.5722	-4.37866e-06
-0.56976	-2.49786e-07	-0.56976	-2.78259e-06	-0.56976	-4.34265e-06
-0.56732	-2.47192e-07	-0.56732	-2.76459e-06	-0.56732	-4.32251e-06
-0.56488	-2.43805e-07	-0.56488	-2.75208e-06	-0.56488	-4.29016e-06
-0.56244	-2.40906e-07	-0.56244	-2.73712e-06	-0.56244	-4.2807e-06
-0.56	-2.36969e-07	-0.56	-2.73499e-06	-0.56	-4.25781e-06
-0.55756	-2.34924e-07	-0.55756	-2.71271e-06	-0.55756	-4.24957e-06
-0.55511	-2.31689e-07	-0.55511	-2.69196e-06	-0.55511	-4.22333e-06
-0.55267	-2.2879e-07	-0.55267	-2.67212e-06	-0.55267	-4.21234e-06
-0.55023	-2.25311e-07	-0.55023	-2.65564e-06	-0.55023	-4.17603e-06
-0.54779	-2.22687e-07	-0.54779	-2.64832e-06	-0.54779	-4.1803e-06
-0.54535	-2.18872e-07	-0.54535	-2.63885e-06	-0.54535	-4.14154e-06
-0.54291	-2.164e-07	-0.54291	-2.6236e-06	-0.54291	-4.11896e-06
-0.54047	-2.12738e-07	-0.54047	-2.60345e-06	-0.54047	-4.08875e-06
-0.53802	-2.09564e-07	-0.53802	-2.58209e-06	-0.53802	-4.05029e-06
-0.53558	-2.0697e-07	-0.53558	-2.56897e-06	-0.53558	-4.0094e-06
-0.53314	-2.03766e-07	-0.53314	-2.5528e-06	-0.53314	-3.99139e-06
-0.5307	-2.0108e-07	-0.5307	-2.53052e-06	-0.5307	-3.96606e-06
-0.52826	-1.98212e-07	-0.52826	-2.52258e-06	-0.52826	-3.94592e-06
-0.52582	-1.94702e-07	-0.52582	-2.50183e-06	-0.52582	-3.92578e-06
-0.52338	-1.91345e-07	-0.52338	-2.48077e-06	-0.52338	-3.90472e-06
-0.52094	-1.8924e-07	-0.52094	-2.47467e-06	-0.52094	-3.87329e-06
-0.51849	-1.85944e-07	-0.51849	-2.45361e-06	-0.51849	-3.84308e-06
-0.51605	-1.83289e-07	-0.51605	-2.44934e-06	-0.51605	-3.8443e-06
-0.51361	-1.80542e-07	-0.51361	-2.43774e-06	-0.51361	-3.81012e-06
-0.51117	-1.77063e-07	-0.51117	-2.42157e-06	-0.51117	-3.81042e-06
-0.50873	-1.74164e-07	-0.50873	-2.41516e-06	-0.50873	-3.7854e-06
-0.50629	-1.71722e-07	-0.50629	-2.38739e-06	-0.50629	-3.75763e-06
-0.50385	-1.68457e-07	-0.50385	-2.36908e-06	-0.50385	-3.72803e-06
-0.5014	-1.64917e-07	-0.5014	-2.35077e-06	-0.5014	-3.70148e-06
-0.49896	-1.61987e-07	-0.49896	-2.3349e-06	-0.49896	-3.66852e-06
-0.49652	-1.59241e-07	-0.49652	-2.32239e-06	-0.49652	-3.66272e-06
-0.49408	-1.56494e-07	-0.49408	-2.31171e-06	-0.49408	-3.64502e-06
-0.49164	-1.53168e-07	-0.49164	-2.29553e-06	-0.49164	-3.61908e-06
-0.4892	-1.50543e-07	-0.4892	-2.27722e-06	-0.4892	-3.59589e-06
-0.48676	-1.47552e-07	-0.48676	-2.25616e-06	-0.48676	-3.56995e-06
-0.48431	-1.44867e-07	-0.48431	-2.24701e-06	-0.48431	-3.55469e-06
-0.48187	-1.42029e-07	-0.48187	-2.23541e-06	-0.48187	-3.52661e-06
-0.47943	-1.3913e-07	-0.47943	-2.22656e-06	-0.47943	-3.50769e-06
-0.47699	-1.36414e-07	-0.47699	-2.20764e-06	-0.47699	-3.46008e-06
-0.47455	-1.32843e-07	-0.47455	-2.17499e-06	-0.47455	-3.45459e-06
-0.47211	-1.30798e-07	-0.47211	-2.16919e-06	-0.47211	-3.41248e-06
-0.46967	-1.27594e-07	-0.46967	-2.14508e-06	-0.46967	-3.41125e-06
-0.46722	-1.25885e-07	-0.46722	-2.12433e-06	-0.46722	-3.40424e-06
-0.46478	-1.22223e-07	-0.46478	-2.10907e-06	-0.46478	-3.37036e-06
-0.46234	-1.19873e-07	-0.46234	-2.09106e-06	-0.46234	-3.35236e-06
-0.4599	-1.1673e-07	-0.4599	-2.08191e-06	-0.4599	-3.33313e-06
-0.45746	-1.13617e-07	-0.45746	-2.07336e-06	-0.45746	-3.29651e-06
-0.45502	-1.10809e-07	-0.45502	-2.05841e-06	-0.45502	-3.28217e-06
-0.45258	-1.08643e-07	-0.45258	-2.04163e-06	-0.45258	-3.26813e-06
-0.45013	-1.06262e-07	-0.45013	-2.02179e-06	-0.45013	-3.22754e-06
-0.44769	-1.02875e-07	-0.44769	-2.00867e-06	-0.44769	-3.20435e-06
-0.44525	-1.00067e-07	-0.44525	-1.98669e-06	-0.44525	-3.18695e-06
-0.44281	-9.70459e-08	-0.44281	-1.9812e-06	-0.44281	-3.15796e-06
-0.44037	-9.45435e-08	-0.44037	-1.97754e-06	-0.44037	-3.13965e-06
-0.43793	-9.24377e-08	-0.43793	-1.9574e-06	-0.43793	-3.13141e-06
-0.43549	-8.84399e-08	-0.43549	-1.93604e-06	-0.43549	-3.11493e-06
-0.43304	-8.66394e-08	-0.43304	-1.92841e-06	-0.43304	-3.07251e-06
-0.4306	-8.38928e-08	-0.4306	-1.90216e-06	-0.4306	-3.05511e-06
-0.42816	-8.17871e-08	-0.42816	-1.88324e-06	-0.42816	-3.03894e-06
-0.42572	-7.86438e-08	-0.42572	-1.86554e-06	-0.42572	-3.01636e-06
-0.42328	-7.67822e-08	-0.42328	-1.8573e-06	-0.42328	-2.97485e-06
-0.42084	-7.41577e-08	-0.42084	-1.84601e-06	-0.42084	-2.95532e-06
-0.4184	-7.15942e-08	-0.4184	-1.82404e-06	-0.4184	-2.93793e-06
-0.41595	-6.98547e-08	-0.41595	-1.8158e-06	-0.41595	-2.91077e-06
-0.41351	-6.68945e-08	-0.41351	-1.80084e-06	-0.41351	-2.89154e-06
-0.41107	-6.48193e-08	-0.41107	-1.77521e-06	-0.41107	-2.87384e-06
-0.40863	-6.18896e-08	-0.40863	-1.76666e-06	-0.40863	-2.84729e-06
-0.40619	-5.97839e-08	-0.40619	-1.75201e-06	-0.40619	-2.83264e-06
-0.40375	-5.74036e-08	-0.40375	-1.7337e-06	-0.40375	-2.80426e-06
-0.40131	-5.50232e-08	-0.40131	-1.72119e-06	-0.40131	-2.77924e-06
-0.39886	-5.26123e-08	-0.39886	-1.71326e-06	-0.39886	-2.75085e-06
-0.39642	-5.07202e-08	-0.39642	-1.69403e-06	-0.39642	-2.73987e-06
-0.39398	-4.78516e-08	-0.39398	-1.68091e-06	-0.39398	-2.71881e-06
-0.39154	-4.6051e-08	-0.39154	-1.67419e-06	-0.39154	-2.69897e-06
-0.3891	-4.27856e-08	-0.3891	-1.66016e-06	-0.3891	-2.68616e-06
-0.38666	-4.1626e-08	-0.38666	-1.65161e-06	-0.38666	-2.66022e-06
-0.38422	-3.85742e-08	-0.38422	-1.63727e-06	-0.38422	-2.6358e-06
-0.38177	-3.67126e-08	-0.38177	-1.61041e-06	-0.38177	-2.61566e-06
-0.37933	-3.3844e-08	-0.37933	-1.59668e-06	-0.37933	-2.58575e-06
-0.37689	-3.2196e-08	-0.37689	-1.58844e-06	-0.37689	-2.57843e-06
-0.37445	-3.00598e-08	-0.37445	-1.57837e-06	-0.37445	-2.55676e-06
-0.37201	-2.72827e-08	-0.37201	-1.56494e-06	-0.37201	-2.51434e-06
-0.36957	-2.51465e-08	-0.36957	-1.54846e-06	-0.36957	-2.49512e-06
-0.36713	-2.41089e-08	-0.36713	-1.53656e-06	-0.36713	-2.48749e-06
-0.36469	-2.17896e-08	-0.36469	-1.51581e-06	-0.36469	-2.45697e-06
-0.36224	-2.05383e-08	-0.36224	-1.49872e-06	-0.36224	-2.4408e-06
-0.3598	-1.77917e-08	-0.3598	-1.49292e-06	-0.3598	-2.41211e-06
-0.35736	-1.66931e-08	-0.35736	-1.47583e-06	-0.35736	-2.40021e-06
-0.35492	-1.50452e-08	-0.35492	-1.46027e-06	-0.35492	-2.38251e-06
-0.35248	-1.26038e-08	-0.35248	-1.45294e-06	-0.35248	-2.36633e-06
-0.35004	-1.05896e-08	-0.35004	-1.44196e-06	-0.35004	-2.34314e-06
-0.3476	-9.552e-09	-0.3476	-1.42822e-06	-0.3476	-2.3175e-06
-0.34515	-7.02515e-09	-0.34515	-1.41479e-06	-0.34515	-2.29248e-06
-0.34271	-5.35278e-09	-0.34271	-1.40564e-06	-0.34271	-2.2757e-06
-0.34027	-3.91541e-09	-0.34027	-1.39038e-06	-0.34027	-2.26166e-06
-0.33783	-2.25525e-09	-0.33783	-1.38641e-06	-0.33783	-2.23663e-06
-0.33539	-7.62939e-10	-0.33539	-1.36353e-06	-0.33539	-2.22107e-06
-0.33295	1.36108e-09	-0.33295	-1.35712e-06	-0.33295	-2.19421e-06
-0.33051	2.63977e-09	-0.33051	-1.34216e-06	-0.33051	-2.17102e-06
-0.32806	4.5105e-09	-0.32806	-1.32294e-06	-0.32806	-2.1582e-06
-0.32562	7.0282e-09	-0.32562	-1.3092e-06	-0.32562	-2.14722e-06
-0.32318	7.57141e-09	-0.32318	-1.29913e-06	-0.32318	-2.13165e-06
-0.32074	9.729e-09	-0.32074	-1.28265e-06	-0.32074	-2.10754e-06
-0.3183	1.13281e-08	-0.3183	-1.2674e-06	-0.3183	-2.09595e-06
-0.31586	1.28784e-08	-0.31586	-1.25977e-06	-0.31586	-2.06726e-06
-0.31342	1.35803e-08	-0.31342	-1.25305e-06	-0.31342	-2.05597e-06
-0.31097	1.53809e-08	-0.31097	-1.23535e-06	-0.31097	-2.02789e-06
-0.30853	1.71204e-08	-0.30853	-1.22223e-06	-0.30853	-2.01447e-06
-0.30609	1.83105e-08	-0.30609	-1.21124e-06	-0.30609	-1.9928e-06
-0.30365	1.9165e-08	-0.30365	-1.19598e-06	-0.30365	-1.97296e-06
-0.30121	2.10571e-08	-0.30121	-1.18378e-06	-0.30121	-1.94824e-06
-0.29877	2.19116e-08	-0.29877	-1.16943e-06	-0.29877	-1.92963e-06
-0.29633	2.40173e-08	-0.29633	-1.15326e-06	-0.29633	-1.90857e-06
-0.29388	2.51465e-08	-0.29388	-1.14319e-06	-0.29388	-1.8924e-06
-0.29144	2.63367e-08	-0.29144	-1.13403e-06	-0.29144	-1.86127e-06
-0.289	2.75574e-08	-0.289	-1.12366e-06	-0.289	-1.85242e-06
-0.28656	2.99683e-08	-0.28656	-1.1026e-06	-0.28656	-1.83014e-06
-0.28412	3.07007e-08	-0.28412	-1.09741e-06	-0.28412	-1.81e-06
-0.28168	3.2074e-08	-0.28168	-1.08063e-06	-0.28168	-1.79199e-06
-0.27924	3.42102e-08	-0.27924	-1.073e-06	-0.27924	-1.77155e-06
-0.27679	3.52783e-08	-0.27679	-1.05133e-06	-0.27679	-1.74652e-06
-0.27435	3.66821e-08	-0.27435	-1.04645e-06	-0.27435	-1.73004e-06
-0.27191	3.77808e-08	-0.27191	-1.03241e-06	-0.27191	-1.71265e-06
-0.26947	3.9032e-08	-0.26947	-1.02264e-06	-0.26947	-1.69128e-06
-0.26703	4.00085e-08	-0.26703	-1.01959e-06	-0.26703	-1.67816e-06
-0.26459	4.18396e-08	-0.26459	-9.9823e-07	-0.26459	-1.67572e-06
-0.26215	4.30603e-08	-0.26215	-9.85413e-07	-0.26215	-1.65863e-06
-0.2597	4.36096e-08	-0.2597	-9.78394e-07	-0.2597	-1.64063e-06
-0.25726	4.52576e-08	-0.25726	-9.64661e-07	-0.25726	-1.60797e-06
-0.25482	4.52881e-08	-0.25482	-9.52148e-07	-0.25482	-1.58844e-06
-0.25238	4.75769e-08	-0.25238	-9.38416e-07	-0.25238	-1.56891e-06
-0.24994	4.91638e-08	-0.24994	-9.21021e-07	-0.24994	-1.54938e-06
-0.2475	5.0415e-08	-0.2475	-9.15222e-07	-0.2475	-1.53656e-06
-0.24506	5.09033e-08	-0.24506	-9.05457e-07	-0.24506	-1.50818e-06
-0.24261	5.27344e-08	-0.24261	-8.91113e-07	-0.24261	-1.48621e-06
-0.24017	5.43213e-08	-0.24017	-8.81958e-07	-0.24017	-1.45508e-06
-0.23773	5.52063e-08	-0.23773	-8.64258e-07	-0.23773	-1.43402e-06
-0.23529	5.66711e-08	-0.23529	-8.5144e-07	-0.23529	-1.42944e-06
-0.23285	5.69763e-08	-0.23285	-8.37097e-07	-0.23285	-1.40686e-06
-0.23041	5.91736e-08	-0.23041	-8.25806e-07	-0.23041	-1.38855e-06
-0.22797	5.92651e-08	-0.22797	-8.16345e-07	-0.22797	-1.38184e-06
-0.22552	6.09131e-08	-0.22552	-8.04443e-07	-0.22552	-1.3559e-06
-0.22308	6.19507e-08	-0.22308	-7.97729e-07	-0.22308	-1.34888e-06
-0.22064	6.37817e-08	-0.22064	-7.86438e-07	-0.22064	-1.32751e-06
-0.2182	6.44226e-08	-0.2182	-7.72095e-07	-0.2182	-1.3092e-06
-0.21576	6.48499e-08	-0.21576	-7.59277e-07	-0.21576	-1.29059e-06
-0.21332	6.57654e-08	-0.21332	-7.48596e-07	-0.21332	-1.27075e-06
-0.21088	6.75049e-08	-0.21088	-7.36084e-07	-0.21088	-1.25763e-06
-0.20844	6.80847e-08	-0.20844	-7.23877e-07	-0.20844	-1.23627e-06
-0.20599	6.89087e-08	-0.20599	-7.15332e-07	-0.20599	-1.21918e-06
-0.20355	7.01904e-08	-0.20355	-7.03735e-07	-0.20355	-1.19965e-06
-0.20111	7.08618e-08	-0.20111	-6.90918e-07	-0.20111	-1.18195e-06
-0.19867	7.27844e-08	-0.19867	-6.80542e-07	-0.19867	-1.15204e-06
-0.19623	7.32422e-08	-0.19623	-6.68945e-07	-0.19623	-1.13617e-06
-0.19379	7.60498e-08	-0.19379	-6.54602e-07	-0.19379	-1.11603e-06
-0.19135	7.66602e-08	-0.19135	-6.44531e-07	-0.19135	-1.09436e-06
-0.1889	7.724e-08	-0.1889	-6.32629e-07	-0.1889	-1.0733e-06
-0.18646	7.90405e-08	-0.18646	-6.23169e-07	-0.18646	-1.05377e-06
-0.18402	7.93457e-08	-0.18402	-6.12488e-07	-0.18402	-1.03119e-06
-0.18158	8.1543e-08	-0.18158	-6.03943e-07	-0.18158	-1.01349e-06
-0.17914	8.21533e-08	-0.17914	-5.91431e-07	-0.17914	-9.95789e-07
-0.1767	8.32214e-08	-0.1767	-5.79529e-07	-0.1767	-9.74731e-07
-0.17426	8.4137e-08	-0.17426	-5.63354e-07	-0.17426	-9.63745e-07
-0.17181	8.53577e-08	-0.17181	-5.52063e-07	-0.17181	-9.45435e-07
-0.16937	8.57849e-08	-0.16937	-5.42908e-07	-0.16937	-9.26819e-07
-0.16693	8.70056e-08	-0.16693	-5.34058e-07	-0.16693	-9.1095e-07
-0.16449	8.81348e-08	-0.16449	-5.2002e-07	-0.16449	-8.89893e-07
-0.16205	8.92334e-08	-0.16205	-5.08728e-07	-0.16205	-8.73718e-07
-0.15961	9.08813e-08	-0.15961	-4.98352e-07	-0.15961	-8.53577e-07
-0.15717	9.12476e-08	-0.15717	-4.85535e-07	-0.15717	-8.34961e-07
-0.15472	9.20105e-08	-0.15472	-4.74243e-07	-0.15472	-8.12073e-07
-0.15228	9.32922e-08	-0.15228	-4.62341e-07	-0.15228	-7.97729e-07
-0.14984	9.47266e-08	-0.14984	-4.49524e-07	-0.14984	-7.74841e-07
-0.1474	9.58252e-08	-0.1474	-4.39667e-07	-0.1474	-7.47986e-07
-0.14496	9.70459e-08	-0.14496	-4.27673e-07	-0.14496	-7.31506e-07
-0.14252	9.75647e-08	-0.14252	-4.20135e-07	-0.14252	-7.1167e-07
-0.14008	9.88159e-08	-0.14008	-4.08264e-07	-0.14008	-6.97632e-07
-0.13763	9.99756e-08	-0.13763	-3.9566e-07	-0.13763	-6.79626e-07
-0.13519	1.00525e-07	-0.13519	-3.8623e-07	-0.13519	-6.55823e-07
-0.13275	1.01227e-07	-0.13275	-3.70178e-07	-0.13275	-6.39038e-07
-0.13031	1.02875e-07	-0.13031	-3.60229e-07	-0.13031	-6.21948e-07
-0.12787	1.0376e-07	-0.12787	-3.52173e-07	-0.12787	-6.01196e-07
-0.12543	1.04034e-07	-0.12543	-3.41522e-07	-0.12543	-5.80139e-07
-0.12299	1.06049e-07	-0.12299	-3.31635e-07	-0.12299	-5.62134e-07
-0.12054	1.07452e-07	-0.12054	-3.21106e-07	-0.12054	-5.48401e-07
-0.1181	1.08612e-07	-0.1181	-3.08868e-07	-0.1181	-5.31311e-07
-0.11566	1.10168e-07	-0.11566	-2.97791e-07	-0.11566	-5.10559e-07
-0.11322	1.10168e-07	-0.11322	-2.88696e-07	-0.11322	-4.97742e-07
-0.11078	1.11603e-07	-0.11078	-2.78809e-07	-0.11078	-4.74854e-07
-0.10834	1.12579e-07	-0.10834	-2.65808e-07	-0.10834	-4.57764e-07
-0.1059	1.14136e-07	-0.1059	-2.57813e-07	-0.1059	-4.37927e-07
-0.10345	1.14716e-07	-0.10345	-2.45392e-07	-0.10345	-4.18091e-07
-0.10101	1.15204e-07	-0.10101	-2.33521e-07	-0.10101	-4.01672e-07
-0.09857	1.1618e-07	-0.09857	-2.23053e-07	-0.09857	-3.79974e-07
-0.09613	1.17981e-07	-0.09613	-2.12555e-07	-0.09613	-3.64899e-07
-0.09369	1.1795e-07	-0.09369	-2.0343e-07	-0.09369	-3.49487e-07
-0.09125	1.18958e-07	-0.09125	-1.90826e-07	-0.09125	-3.26538e-07
-0.08881	1.19659e-07	-0.08881	-1.81549e-07	-0.08881	-3.10181e-07
-0.08636	1.20483e-07	-0.08636	-1.70929e-07	-0.08636	-2.9248e-07
-0.08392	1.21857e-07	-0.08392	-1.61041e-07	-0.08392	-2.74445e-07
-0.08148	1.23169e-07	-0.08148	-1.49323e-07	-0.08148	-2.56958e-07
-0.07904	1.23291e-07	-0.07904	-1.37726e-07	-0.07904	-2.39136e-07
-0.0766	1.24573e-07	-0.0766	-1.28174e-07	-0.0766	-2.20551e-07
-0.07416	1.2442e-07	-0.07416	-1.18622e-07	-0.07416	-2.03735e-07
-0.07172	1.26831e-07	-0.07172	-1.07269e-07	-0.07172	-1.88934e-07
-0.06927	1.27502e-07	-0.06927	-9.82971e-08	-0.06927	-1.71112e-07
-0.06683	1.28784e-07	-0.06683	-8.70972e-08	-0.06683	-1.5506e-07
-0.06439	1.29089e-07	-0.06439	-7.69043e-08	-0.06439	-1.4032e-07
-0.06195	1.297e-07	-0.06195	-6.68945e-08	-0.06195	-1.23047e-07
-0.05951	1.30127e-07	-0.05951	-5.62744e-08	-0.05951	-1.09772e-07
-0.05707	1.31378e-07	-0.05707	-4.58984e-08	-0.05707	-9.21326e-08
-0.05463	1.33026e-07	-0.05463	-3.54309e-08	-0.05463	-7.56226e-08
-0.05219	1.32813e-07	-0.05219	-2.55737e-08	-0.05219	-6.06995e-08
-0.04974	1.33606e-07	-0.04974	-1.40381e-08	-0.04974	-4.22974e-08
-0.0473	1.34918e-07	-0.0473	-3.50647e-09	-0.0473	-2.49023e-08
-0.04486	1.36108e-07	-0.04486	6.13403e-09	-0.04486	-9.03625e-09
-0.04242	1.37146e-07	-0.04242	1.66321e-08	-0.04242	9.46045e-09
-0.03998	1.36475e-07	-0.03998	2.70081e-08	-0.03998	2.48413e-08
-0.03754	1.37848e-07	-0.03754	3.85437e-08	-0.03754	4.21753e-08
-0.0351	1.38611e-07	-0.0351	4.85229e-08	-0.0351	5.82886e-08
-0.03265	1.39618e-07	-0.03265	5.93262e-08	-0.03265	7.44019e-08
-0.03021	1.40381e-07	-0.03021	6.90918e-08	-0.03021	9.10034e-08
-0.02777	1.41602e-07	-0.02777	7.96204e-08	-0.02777	1.08612e-07
-0.02533	1.42181e-07	-0.02533	9.01794e-08	-0.02533	1.25702e-07
-0.02289	1.42212e-07	-0.02289	1.00525e-07	-0.02289	1.43921e-07
-0.02045	1.43188e-07	-0.02045	1.10107e-07	-0.02045	1.60065e-07
-0.01801	1.44501e-07	-0.01801	1.21857e-07	-0.01801	1.77094e-07
-0.01556	1.44653e-07	-0.01556	1.31775e-07	-0.01556	1.93451e-07
-0.01312	1.45142e-07	-0.01312	1.41663e-07	-0.01312	2.08923e-07
-0.01068	1.46667e-07	-0.01068	1.52008e-07	-0.01068	2.25037e-07
-0.00824	1.47339e-07	-0.00824	1.63147e-07	-0.00824	2.42218e-07
-0.0058	1.48102e-07	-0.0058	1.72363e-07	-0.0058	2.58698e-07
-0.00336	1.48132e-07	-0.00336	1.82953e-07	-0.00336	2.76062e-07
-0.000915527	1.48987e-07	-0.000915527	1.92993e-07	-0.000915527	2.92877e-07
0.00153	1.49506e-07	0.00153	2.03308e-07	0.00153	3.10059e-07
0.00397	1.50299e-07	0.00397	2.14447e-07	0.00397	3.27454e-07
0.00641	1.50543e-07	0.00641	2.2464e-07	0.00641	3.44879e-07
0.00885	1.50757e-07	0.00885	2.35443e-07	0.00885	3.61603e-07
0.01129	1.50909e-07	0.01129	2.46307e-07	0.01129	3.79791e-07
0.01373	1.50635e-07	0.01373	2.56683e-07	0.01373	3.9679e-07
0.01617	1.51306e-07	0.01617	2.67487e-07	0.01617	4.15924e-07
0.01862	1.52344e-07	0.01862	2.78107e-07	0.01862	4.3161e-07
0.02106	1.52344e-07	0.02106	2.89459e-07	0.02106	4.50195e-07
0.0235	1.52985e-07	0.0235	3.00049e-07	0.0235	4.67194e-07
0.02594	1.54083e-07	0.02594	3.10913e-07	0.02594	4.85382e-07
0.02838	1.54388e-07	0.02838	3.22021e-07	0.02838	5.02686e-07
0.03082	1.54907e-07	0.03082	3.32001e-07	0.03082	5.21454e-07
0.03326	1.55609e-07	0.03326	3.43506e-07	0.03326	5.3894e-07
0.03571	1.5683e-07	0.03571	3.54614e-07	0.03571	5.5658e-07
0.03815	1.56769e-07	0.03815	3.65021e-07	0.03815	5.74066e-07
0.04059	1.57562e-07	0.04059	3.75427e-07	0.04059	5.91675e-07
0.04303	1.58051e-07	0.04303	3.86475e-07	0.04303	6.0965e-07
0.04547	1.59149e-07	0.04547	3.97003e-07	0.04547	6.26526e-07
0.04791	1.58661e-07	0.04791	4.07043e-07	0.04791	6.43921e-07
0.05035	1.59119e-07	0.05035	4.17542e-07	0.05035	6.62842e-07
0.0528	1.60065e-07	0.0528	4.29901e-07	0.0528	6.80847e-07
0.05524	1.59973e-07	0.05524	4.41803e-07	0.05524	6.98853e-07
0.05768	1.60797e-07	0.05768	4.50623e-07	0.05768	7.16553e-07
0.06012	1.6156e-07	0.06012	4.617e-07	0.06012	7.36389e-07
0.06256	1.61591e-07	0.06256	4.70978e-07	0.06256	7.51953e-07
0.065	1.61682e-07	0.065	4.81873e-07	0.065	7.724e-07
0.06744	1.6214e-07	0.06744	4.92065e-07	0.06744	7.89795e-07
0.06989	1.62476e-07	0.06989	5.04089e-07	0.06989	8.09326e-07
0.07233	1.62842e-07	0.07233	5.12085e-07	0.07233	8.27637e-07
0.07477	1.63086e-07	0.07477	5.24811e-07	0.07477	8.48694e-07
0.07721	1.63452e-07	0.07721	5.35126e-07	0.07721	8.66699e-07
0.07965	1.64429e-07	0.07965	5.45349e-07	0.07965	8.84705e-07
0.08209	1.65009e-07	0.08209	5.56793e-07	0.08209	9.01794e-07
0.08453	1.64398e-07	0.08453	5.67657e-07	0.08453	9.23767e-07
0.08698	1.65497e-07	0.08698	5.78033e-07	0.08698	9.41467e-07
0.08942	1.6571e-07	0.08942	5.90515e-07	0.08942	9.6344e-07
0.09186	1.66534e-07	0.09186	6.01105e-07	0.09186	9.83887e-07
0.0943	1.66687e-07	0.0943	6.11572e-07	0.0943	1.0083e-06
0.09674	1.66901e-07	0.09674	6.22864e-07	0.09674	1.0257e-06
0.09918	1.68213e-07	0.09918	6.37207e-07	0.09918	1.04675e-06
0.10162	1.68518e-07	0.10162	6.46667e-07	0.10162	1.06689e-06
0.10406	1.68518e-07	0.10406	6.57959e-07	0.10406	1.08826e-06
0.10651	1.6861e-07	0.10651	6.67419e-07	0.10651	1.11084e-06
0.10895	1.69922e-07	0.10895	6.81458e-07	0.10895	1.13037e-06
0.11139	1.70563e-07	0.11139	6.92139e-07	0.11139	1.15082e-06
0.11383	1.7041e-07	0.11383	7.0282e-07	0.11383	1.16852e-06
0.11627	1.71387e-07	0.11627	7.14111e-07	0.11627	1.18652e-06
0.11871	1.72089e-07	0.11871	7.28149e-07	0.11871	1.21124e-06
0.12115	1.73004e-07	0.12115	7.3761e-07	0.12115	1.22955e-06
0.1236	1.74255e-07	0.1236	7.50427e-07	0.1236	1.25214e-06
0.12604	1.74286e-07	0.12604	7.64465e-07	0.12604	1.26953e-06
0.12848	1.75507e-07	0.12848	7.74536e-07	0.12848	1.29211e-06
0.13092	1.76025e-07	0.13092	7.85828e-07	0.13092	1.30707e-06
0.13336	1.76483e-07	0.13336	8.01392e-07	0.13336	1.32751e-06
0.1358	1.78162e-07	0.1358	8.16956e-07	0.1358	1.34552e-06
0.13824	1.78314e-07	0.13824	8.255e-07	0.13824	1.36169e-06
0.14069	1.79657e-07	0.14069	8.39233e-07	0.14069	1.38336e-06
0.14313	1.81e-07	0.14313	8.5022e-07	0.14313	1.40381e-06
0.14557	1.81396e-07	0.14557	8.61511e-07	0.14557	1.42578e-06
0.14801	1.8222e-07	0.14801	8.73718e-07	0.14801	1.44653e-06
0.15045	1.82556e-07	0.15045	8.87756e-07	0.15045	1.46729e-06
0.15289	1.85059e-07	0.15289	8.98438e-07	0.15289	1.4859e-06
0.15533	1.84814e-07	0.15533	9.10339e-07	0.15533	1.50238e-06
0.15778	1.85608e-07	0.15778	9.24072e-07	0.15778	1.52954e-06
0.16022	1.86035e-07	0.16022	9.34753e-07	0.16022	1.54205e-06
0.16266	1.87775e-07	0.16266	9.47876e-07	0.16266	1.56616e-06
0.1651	1.89056e-07	0.1651	9.62219e-07	0.1651	1.59058e-06
0.16754	1.90826e-07	0.16754	9.72595e-07	0.16754	1.60858e-06
0.16998	1.92688e-07	0.16998	9.85413e-07	0.16998	1.63239e-06
0.17242	1.93604e-07	0.17242	1.00067e-06	0.17242	1.65558e-06
0.17487	1.95404e-07	0.17487	1.01074e-06	0.17487	1.67694e-06
0.17731	1.9632e-07	0.17731	1.02905e-06	0.17731	1.69739e-06
0.17975	1.97815e-07	0.17975	1.04126e-06	0.17975	1.71783e-06
0.18219	1.99829e-07	0.18219	1.05499e-06	0.18219	1.73676e-06
0.18463	2.02332e-07	0.18463	1.06628e-06	0.18463	1.76453e-06
0.18707	2.03888e-07	0.18707	1.07513e-06	0.18707	1.79169e-06
0.18951	2.05994e-07	0.18951	1.08826e-06	0.18951	1.80573e-06
0.19196	2.08282e-07	0.19196	1.10443e-06	0.19196	1.82648e-06
0.1944	2.10236e-07	0.1944	1.11572e-06	0.1944	1.84875e-06
0.19684	2.12463e-07	0.19684	1.12946e-06	0.19684	1.8689e-06
0.19928	2.1402e-07	0.19928	1.13861e-06	0.19928	1.89056e-06
0.20172	2.16766e-07	0.20172	1.15631e-06	0.20172	1.91345e-06
0.20416	2.18384e-07	0.20416	1.17004e-06	0.20416	1.93848e-06
0.2066	2.2052e-07	0.2066	1.18011e-06	0.2066	1.96289e-06
0.20905	2.22382e-07	0.20905	1.19568e-06	0.20905	1.9812e-06
0.21149	2.24792e-07	0.21149	1.20514e-06	0.21149	2.00348e-06
0.21393	2.27936e-07	0.21393	1.22162e-06	0.21393	2.02881e-06
0.21637	2.29736e-07	0.21637	1.23718e-06	0.21637	2.05383e-06
0.21881	2.32361e-07	0.21881	1.24878e-06	0.21881	2.07672e-06
0.22125	2.34467e-07	0.22125	1.26495e-06	0.22125	2.09778e-06
0.22369	2.36542e-07	0.22369	1.28021e-06	0.22369	2.12677e-06
0.22614	2.3938e-07	0.22614	1.29883e-06	0.22614	2.14905e-06
0.22858	2.42401e-07	0.22858	1.31317e-06	0.22858	2.17529e-06
0.23102	2.453e-07	0.23102	1.32538e-06	0.23102	2.19666e-06
0.23346	2.47925e-07	0.23346	1.33667e-06	0.23346	2.21802e-06
0.2359	2.50854e-07	0.2359	1.34796e-06	0.2359	2.24091e-06
0.23834	2.53204e-07	0.23834	1.36505e-06	0.23834	2.26257e-06
0.24078	2.565e-07	0.24078	1.37207e-06	0.24078	2.29492e-06
0.24323	2.59003e-07	0.24323	1.38641e-06	0.24323	2.31079e-06
0.24567	2.61871e-07	0.24567	1.40442e-06	0.24567	2.3291e-06
0.24811	2.64587e-07	0.24811	1.4212e-06	0.24811	2.35626e-06
0.25055	2.67609e-07	0.25055	1.44043e-06	0.25055	2.37946e-06
0.25299	2.70447e-07	0.25299	1.44867e-06	0.25299	2.40662e-06
0.25543	2.73376e-07	0.25543	1.46942e-06	0.25543	2.43103e-06
0.25787	2.76398e-07	0.25787	1.48285e-06	0.25787	2.4472e-06
0.26031	2.78442e-07	0.26031	1.49475e-06	0.26031	2.47498e-06
0.26276	2.82166e-07	0.26276	1.50757e-06	0.26276	2.49756e-06
0.2652	2.86407e-07	0.2652	1.52832e-06	0.2652	2.53021e-06
0.26764	2.89459e-07	0.26764	1.54053e-06	0.26764	2.55035e-06
0.27008	2.9248e-07	0.27008	1.55151e-06	0.27008	2.57385e-06
0.27252	2.94983e-07	0.27252	1.57013e-06	0.27252	2.59918e-06
0.27496	2.97211e-07	0.27496	1.59332e-06	0.27496	2.62634e-06
0.2774	3.0069e-07	0.2774	1.60522e-06	0.2774	2.64862e-06
0.27985	3.0365e-07	0.27985	1.61804e-06	0.27985	2.677e-06
0.28229	3.06793e-07	0.28229	1.64154e-06	0.28229	2.70294e-06
0.28473	3.10486e-07	0.28473	1.65497e-06	0.28473	2.73499e-06
0.28717	3.1311e-07	0.28717	1.67206e-06	0.28717	2.75787e-06
0.28961	3.16956e-07	0.28961	1.69098e-06	0.28961	2.78656e-06
0.29205	3.2077e-07	0.29205	1.70044e-06	0.29205	2.82104e-06
0.29449	3.23456e-07	0.29449	1.71173e-06	0.29449	2.84729e-06
0.29694	3.26904e-07	0.29694	1.73584e-06	0.29694	2.87903e-06
0.29938	3.29468e-07	0.29938	1.74194e-06	0.29938	2.9068e-06
0.30182	3.32336e-07	0.30182	1.75323e-06	0.30182	2.92755e-06
0.30426	3.36517e-07	0.30426	1.77246e-06	0.30426	2.9541e-06
0.3067	3.39233e-07	0.3067	1.79077e-06	0.3067	2.98096e-06
0.30914	3.43109e-07	0.30914	1.81e-06	0.30914	3.01422e-06
0.31158	3.45703e-07	0.31158	1.83624e-06	0.31158	3.04871e-06
0.31403	3.48663e-07	0.31403	1.84448e-06	0.31403	3.07526e-06
0.31647	3.51563e-07	0.31647	1.86615e-06	0.31647	3.09326e-06
0.31891	3.55804e-07	0.31891	1.88263e-06	0.31891	3.12592e-06
0.32135	3.59802e-07	0.32135	1.89636e-06	0.32135	3.15216e-06
0.32379	3.62335e-07	0.32379	1.91406e-06	0.32379	3.17535e-06
0.32623	3.65875e-07	0.32623	1.93329e-06	0.32623	3.20068e-06
0.32867	3.70056e-07	0.32867	1.95007e-06	0.32867	3.22418e-06
0.33112	3.7326e-07	0.33112	1.96014e-06	0.33112	3.255e-06
0.33356	3.75214e-07	0.33356	1.97418e-06	0.33356	3.29437e-06
0.336	3.7854e-07	0.336	1.99738e-06	0.336	3.32245e-06
0.33844	3.83301e-07	0.33844	2.01538e-06	0.33844	3.34442e-06
0.34088	3.87665e-07	0.34088	2.03796e-06	0.34088	3.3725e-06
0.34332	3.90442e-07	0.34332	2.04895e-06	0.34332	3.39417e-06
0.34576	3.92151e-07	0.34576	2.06604e-06	0.34576	3.42102e-06
0.34821	3.97217e-07	0.34821	2.08466e-06	0.34821	3.4433e-06
0.35065	4.00574e-07	0.35065	2.10602e-06	0.35065	3.46558e-06
0.35309	4.03351e-07	0.35309	2.12799e-06	0.35309	3.47717e-06
0.35553	4.07257e-07	0.35553	2.14264e-06	0.35553	3.50647e-06
0.35797	4.10858e-07	0.35797	2.15851e-06	0.35797	3.52631e-06
0.36041	4.13788e-07	0.36041	2.17163e-06	0.36041	3.54065e-06
0.36285	4.17847e-07	0.36285	2.19147e-06	0.36285	3.58643e-06
0.3653	4.216e-07	0.3653	2.21069e-06	0.3653	3.61267e-06
0.36774	4.25293e-07	0.36774	2.22992e-06	0.36774	3.63861e-06
0.37018	4.28925e-07	0.37018	2.24518e-06	0.37018	3.65631e-06
0.37262	4.33014e-07	0.37262	2.26227e-06	0.37262	3.69232e-06
0.37506	4.35822e-07	0.37506	2.27325e-06	0.37506	3.72009e-06
0.3775	4.40582e-07	0.3775	2.29431e-06	0.3775	3.7561e-06
0.37994	4.44611e-07	0.37994	2.30988e-06	0.37994	3.79211e-06
0.38239	4.48364e-07	0.38239	2.33276e-06	0.38239	3.81378e-06
0.38483	4.5163e-07	0.38483	2.35138e-06	0.38483	3.84003e-06
0.38727	4.55475e-07	0.38727	2.3645e-06	0.38727	3.8678e-06
0.38971	4.59381e-07	0.38971	2.3822e-06	0.38971	3.89526e-06
0.39215	4.63623e-07	0.39215	2.40021e-06	0.39215	3.92242e-06
0.39459	4.67529e-07	0.39459	2.40967e-06	0.39459	3.95691e-06
0.39703	4.70428e-07	0.39703	2.42798e-06	0.39703	3.99445e-06
0.39948	4.75037e-07	0.39948	2.44568e-06	0.39948	4.03809e-06
0.40192	4.7821e-07	0.40192	2.46552e-06	0.40192	4.0683e-06
0.40436	4.8175e-07	0.40436	2.48657e-06	0.40436	4.09698e-06
0.4068	4.86328e-07	0.4068	2.49817e-06	0.4068	4.12323e-06
0.40924	4.89532e-07	0.40924	2.51038e-06	0.40924	4.1452e-06
0.41168	4.93469e-07	0.41168	2.53693e-06	0.41168	4.15894e-06
0.41412	4.96765e-07	0.41412	2.55432e-06	0.41412	4.19769e-06
0.41656	5.01129e-07	0.41656	2.57416e-06	0.41656	4.21783e-06
0.41901	5.04669e-07	0.41901	2.5882e-06	0.41901	4.25049e-06
0.42145	5.09125e-07	0.42145	2.61292e-06	0.42145	4.26514e-06
0.42389	5.12207e-07	0.42389	2.63733e-06	0.42389	4.32373e-06
0.42633	5.16357e-07	0.42633	2.65045e-06	0.42633	4.33746e-06
0.42877	5.19806e-07	0.42877	2.65808e-06	0.42877	4.37469e-06
0.43121	5.23407e-07	0.43121	2.68188e-06	0.43121	4.41528e-06
0.43365	5.27161e-07	0.43365	2.7002e-06	0.43365	4.4281e-06
0.4361	5.30609e-07	0.4361	2.72247e-06	0.4361	4.45282e-06
0.43854	5.33264e-07	0.43854	2.73926e-06	0.43854	4.49371e-06
0.44098	5.36438e-07	0.44098	2.76947e-06	0.44098	4.52423e-06
0.44342	5.39917e-07	0.44342	2.78809e-06	0.44342	4.55444e-06
0.44586	5.43945e-07	0.44586	2.80151e-06	0.44586	4.58282e-06
0.4483	5.47089e-07	0.4483	2.82562e-06	0.4483	4.61334e-06
0.45074	5.50903e-07	0.45074	2.85339e-06	0.45074	4.64081e-06
0.45319	5.53497e-07	0.45319	2.87506e-06	0.45319	4.67224e-06
0.45563	5.56763e-07	0.45563	2.89185e-06	0.45563	4.72107e-06
0.45807	5.60333e-07	0.45807	2.91626e-06	0.45807	4.75342e-06
0.46051	5.64453e-07	0.46051	2.9303e-06	0.46051	4.7757e-06
0.46295	5.67474e-07	0.46295	2.95746e-06	0.46295	4.81445e-06
0.46539	5.70557e-07	0.46539	2.96967e-06	0.46539	4.85077e-06
0.46783	5.73151e-07	0.46783	2.98401e-06	0.46783	4.89349e-06
0.47028	5.7724e-07	0.47028	2.99591e-06	0.47028	4.92279e-06
0.47272	5.81085e-07	0.47272	3.013e-06	0.47272	4.95026e-06
0.47516	5.84351e-07	0.47516	3.0246e-06	0.47516	4.96704e-06
0.4776	5.87189e-07	0.4776	3.04504e-06	0.4776	5.00305e-06
0.48004	5.91827e-07	0.48004	3.06488e-06	0.48004	5.04242e-06
0.48248	5.94452e-07	0.48248	3.09021e-06	0.48248	5.07019e-06
0.48492	5.98236e-07	0.48492	3.1012e-06	0.48492	5.09674e-06
0.48737	6.00891e-07	0.48737	3.12378e-06	0.48737	5.13641e-06
0.48981	6.04553e-07	0.48981	3.15033e-06	0.48981	5.15625e-06
0.49225	6.06995e-07	0.49225	3.17078e-06	0.49225	5.19501e-06
0.49469	6.08826e-07	0.49469	3.18085e-06	0.49469	5.21851e-06
0.49713	6.12793e-07	0.49713	3.21472e-06	0.49713	5.25848e-06
0.49957	6.1615e-07	0.49957	3.23212e-06	0.49957	5.27771e-06
0.50201	6.19202e-07	0.50201	3.24646e-06	0.50201	5.30426e-06
0.50446	6.22864e-07	0.50446	3.26141e-06	0.50446	5.33325e-06
0.5069	6.26831e-07	0.5069	3.27667e-06	0.5069	5.36743e-06
0.50934	6.29578e-07	0.50934	3.29773e-06	0.50934	5.39734e-06
0.51178	6.32629e-07	0.51178	3.31482e-06	0.51178	5.41962e-06
0.51422	6.36292e-07	0.51422	3.34259e-06	0.51422	5.45258e-06
0.51666	6.39648e-07	0.51666	3.36365e-06	0.51666	5.4834e-06
0.5191	6.43921e-07	0.5191	3.38287e-06	0.5191	5.52734e-06
0.52155	6.46973e-07	0.52155	3.40302e-06	0.52155	5.56641e-06
0.52399	6.50024e-07	0.52399	3.41705e-06	0.52399	5.6015e-06
0.52643	6.53381e-07	0.52643	3.42896e-06	0.52643	5.6311e-06
0.52887	6.57349e-07	0.52887	3.45123e-06	0.52887	5.66345e-06
0.53131	6.61316e-07	0.53131	3.45734e-06	0.53131	5.70374e-06
0.53375	6.65588e-07	0.53375	3.47534e-06	0.53375	5.7373e-06
0.53619	6.70166e-07	0.53619	3.50464e-06	0.53619	5.75073e-06
0.53864	6.73523e-07	0.53864	3.52478e-06	0.53864	5.79926e-06
0.54108	6.75354e-07	0.54108	3.5376e-06	0.54108	5.80505e-06
0.54352	6.80237e-07	0.54352	3.56323e-06	0.54352	5.82642e-06
0.54596	6.83289e-07	0.54596	3.57971e-06	0.54596	5.84259e-06
0.5484	6.88171e-07	0.5484	3.60443e-06	0.5484	5.88989e-06
0.55084	6.92444e-07	0.55084	3.6322e-06	0.55084	5.9082e-06
0.55328	6.94885e-07	0.55328	3.64471e-06	0.55328	5.95093e-06
0.55573	7.00378e-07	0.55573	3.66913e-06	0.55573	5.98663e-06
0.55817	7.04041e-07	0.55817	3.69446e-06	0.55817	5.99731e-06
0.56061	7.08618e-07	0.56061	3.71857e-06	0.56061	6.01746e-06
0.56305	7.13196e-07	0.56305	3.7442e-06	0.56305	6.05164e-06
0.56549	7.16248e-07	0.56549	3.72406e-06	0.56549	6.05164e-06
0.56793	7.22351e-07	0.56793	3.75549e-06	0.56793	6.09436e-06
0.57037	7.26013e-07	0.57037	3.77258e-06	0.57037	6.13098e-06
0.57281	7.30286e-07	0.57281	3.80096e-06	0.57281	6.14624e-06
0.57526	7.35779e-07	0.57526	3.82507e-06	0.57526	6.16455e-06
0.5777	7.40662e-07	0.5777	3.85742e-06	0.5777	6.21338e-06
0.58014	7.44629e-07	0.58014	3.87115e-06	0.58014	6.23779e-06
0.58258	7.48596e-07	0.58258	3.88702e-06	0.58258	6.27136e-06
0.58502	7.53784e-07	0.58502	3.92029e-06	0.58502	6.29578e-06
0.58746	7.59583e-07	0.58746	3.93738e-06	0.58746	6.3446e-06
0.5899	7.64465e-07	0.5899	3.94165e-06	0.5899	6.37512e-06
0.59235	7.69958e-07	0.59235	3.9682e-06	0.59235	6.39038e-06
0.59479	7.74231e-07	0.59479	3.99658e-06	0.59479	6.43005e-06
0.59723	7.79724e-07	0.59723	4.03076e-06	0.59723	6.45752e-06
0.59967	7.85522e-07	0.59967	4.05212e-06	0.59967	6.49719e-06
0.60211	7.9071e-07	0.60211	4.0799e-06	0.60211	6.52161e-06
0.60455	7.95593e-07	0.60455	4.09302e-06	0.60455	6.55823e-06
0.60699	8.00781e-07	0.60699	4.12537e-06	0.60699	6.60706e-06
0.60944	8.05359e-07	0.60944	4.14978e-06	0.60944	6.64673e-06
0.61188	8.12988e-07	0.61188	4.1684e-06	0.61188	6.66504e-06
0.61432	8.18481e-07	0.61432	4.1983e-06	0.61432	6.68945e-06
0.61676	8.24585e-07	0.61676	4.21692e-06	0.61676	6.73218e-06
0.6192	8.29773e-07	0.6192	4.23126e-06	0.6192	6.74133e-06
0.62164	8.36792e-07	0.62164	4.26178e-06	0.62164	6.78101e-06
0.62408	8.41675e-07	0.62408	4.28833e-06	0.62408	6.82678e-06
0.62653	8.48389e-07	0.62653	4.29321e-06	0.62653	6.83594e-06
0.62897	8.54797e-07	0.62897	4.3277e-06	0.62897	6.86951e-06
0.63141	8.61206e-07	0.63141	4.33533e-06	0.63141	6.91833e-06
0.63385	8.68225e-07	0.63385	4.3512e-06	0.63385	6.96411e-06
0.63629	8.75244e-07	0.63629	4.37256e-06	0.63629	7.00073e-06
0.63873	8.80737e-07	0.63873	4.40125e-06	0.63873	7.04346e-06
0.64117	8.88977e-07	0.64117	4.42627e-06	0.64117	7.09229e-06
0.64362	8.95386e-07	0.64362	4.45313e-06	0.64362	7.14111e-06
0.64606	9.021e-07	0.64606	4.46869e-06	0.64606	7.19299e-06
0.6485	9.09729e-07	0.6485	4.48578e-06	0.6485	7.22961e-06
0.65094	9.16138e-07	0.65094	4.49982e-06	0.65094	7.28149e-06
0.65338	9.24072e-07	0.65338	4.5224e-06	0.65338	7.33337e-06
0.65582	9.32312e-07	0.65582	4.55963e-06	0.65582	7.38831e-06
0.65826	9.3811e-07	0.65826	4.57886e-06	0.65826	7.40967e-06
0.66071	9.46045e-07	0.66071	4.58954e-06	0.66071	7.42798e-06
0.66315	9.53064e-07	0.66315	4.61365e-06	0.66315	7.45239e-06
0.66559	9.60999e-07	0.66559	4.64111e-06	0.66559	7.51953e-06
0.66803	9.68018e-07	0.66803	4.664e-06	0.66803	7.547e-06
0.67047	9.76868e-07	0.67047	4.6814e-06	0.67047	7.58972e-06
0.67291	9.85107e-07	0.67291	4.71008e-06	0.67291	7.59583e-06
0.67535	9.94568e-07	0.67535	4.72198e-06	0.67535	7.64465e-06
0.6778	1.0022e-06	0.6778	4.75952e-06	0.6778	7.69958e-06
0.68024	1.01013e-06	0.68024	4.78851e-06	0.68024	7.724e-06
0.68268	1.01837e-06	0.68268	4.81232e-06	0.68268	7.80945e-06
0.68512	1.0257e-06	0.68512	4.82788e-06	0.68512	7.84302e-06
0.68756	1.03577e-06	0.68756	4.86786e-06	0.68756	7.87659e-06
0.69	1.04431e-06	0.69	4.89319e-06	0.69	7.94983e-06
0.69244	1.05316e-06	0.69244	4.91119e-06	0.69244	7.96204e-06
0.69489	1.0614e-06	0.69489	4.91882e-06	0.69489	8.00781e-06
0.69733	1.07086e-06	0.69733	4.94812e-06	0.69733	8.04443e-06
0.69977	1.07971e-06	0.69977	4.98657e-06	0.69977	8.07495e-06
0.70221	1.08887e-06	0.70221	5.01801e-06	0.70221	8.10242e-06
0.70465	1.09924e-06	0.70465	5.03113e-06	0.70465	8.14819e-06
0.70709	1.10809e-06	0.70709	5.04669e-06	0.70709	8.17566e-06
0.70953	1.11633e-06	0.70953	5.06897e-06	0.70953	8.20313e-06
0.71198	1.12549e-06	0.71198	5.0943e-06	0.71198	8.20923e-06
0.71442	1.13617e-06	0.71442	5.12177e-06	0.71442	8.23364e-06
0.71686	1.14532e-06	0.71686	5.10254e-06	0.71686	8.255e-06
0.7193	1.15601e-06	0.7193	5.13e-06	0.7193	8.255e-06
0.72174	1.16669e-06	0.72174	5.14221e-06	0.72174	8.27942e-06
0.72418	1.17584e-06	0.72418	5.19165e-06	0.72418	8.30383e-06
0.72662	1.185e-06	0.72662	5.22766e-06	0.72662	8.31604e-06
0.72906	1.19507e-06	0.72906	5.25146e-06	0.72906	8.35266e-06
0.73151	1.20544e-06	0.73151	5.27405e-06	0.73151	8.37402e-06
0.73395	1.21643e-06	0.73395	5.30396e-06	0.73395	8.40454e-06
0.73639	1.2262e-06	0.73639	5.32745e-06	0.73639	8.46252e-06
0.73883	1.23718e-06	0.73883	5.33691e-06	0.73883	8.47778e-06
0.74127	1.24878e-06	0.74127	5.35461e-06	0.74127	8.51135e-06
0.74371	1.25854e-06	0.74371	5.36041e-06	0.74371	8.53882e-06
0.74615	1.26953e-06	0.74615	5.37628e-06	0.74615	8.57544e-06
0.7486	1.27991e-06	0.7486	5.37933e-06	0.7486	8.62122e-06
0.75104	1.29181e-06	0.75104	5.41168e-06	0.75104	8.64563e-06
0.75348	1.30157e-06	0.75348	5.44556e-06	0.75348	8.6853e-06
0.75592	1.31317e-06	0.75592	5.47211e-06	0.75592	8.70667e-06
0.75836	1.32355e-06	0.75836	5.48859e-06	0.75836	8.75549e-06
0.7608	1.33362e-06	0.7608	5.5072e-06	0.7608	8.77991e-06
0.76324	1.34674e-06	0.76324	5.53741e-06	0.76324	8.80432e-06
0.76569	1.35742e-06	0.76569	5.56396e-06	0.76569	8.83789e-06
0.76813	1.36719e-06	0.76813	5.59418e-06	0.76813	8.8501e-06
0.77057	1.37939e-06	0.77057	5.63202e-06	0.77057	8.88977e-06
0.77301	1.3913e-06	0.77301	5.65002e-06	0.77301	8.9447e-06
0.77545	1.40167e-06	0.77545	5.68695e-06	0.77545	8.95691e-06
0.77789	1.41449e-06	0.77789	5.67047e-06	0.77789	9.0332e-06
0.78033	1.42548e-06	0.78033	5.70343e-06	0.78033	9.08813e-06
0.78278	1.43677e-06	0.78278	5.72235e-06	0.78278	9.11255e-06
0.78522	1.44897e-06	0.78522	5.75745e-06	0.78522	9.16138e-06
0.78766	1.46057e-06	0.78766	5.78766e-06	0.78766	9.23462e-06
0.7901	1.47278e-06	0.7901	5.82428e-06	0.7901	9.25903e-06
0.79254	1.48651e-06	0.79254	5.85144e-06	0.79254	9.30176e-06
0.79498	1.49689e-06	0.79498	5.86884e-06	0.79498	9.33838e-06
0.79742	1.5097e-06	0.79742	5.87524e-06	0.79742	9.37805e-06
0.79987	1.51947e-06	0.79987	5.89813e-06	0.79987	9.39026e-06
0.80231	1.5332e-06	0.80231	5.93292e-06	0.80231	9.44214e-06
0.80475	1.54572e-06	0.80475	5.98053e-06	0.80475	9.46655e-06
0.80719	1.55731e-06	0.80719	6.0141e-06	0.80719	9.46655e-06
0.80963	1.56891e-06	0.80963	6.04553e-06	0.80963	9.50012e-06
0.81207	1.58142e-06	0.81207	6.05469e-06	0.81207	9.52759e-06
0.81451	1.59363e-06	0.81451	6.10046e-06	0.81451	9.54285e-06
0.81696	1.60583e-06	0.81696	6.10352e-06	0.81696	9.57642e-06
0.8194	1.61835e-06	0.8194	6.13403e-06	0.8194	9.58862e-06
0.82184	1.63055e-06	0.82184	6.16455e-06	0.82184	9.60388e-06
0.82428	1.64154e-06	0.82428	6.19812e-06	0.82428	9.6283e-06
0.82672	1.65466e-06	0.82672	6.21643e-06	0.82672	9.65271e-06
0.82916	1.66626e-06	0.82916	6.24084e-06	0.82916	9.66797e-06
0.8316	1.67816e-06	0.8316	6.27136e-06	0.8316	9.7168e-06
0.83405	1.68915e-06	0.83405	6.29578e-06	0.83405	9.73816e-06
0.83649	1.70227e-06	0.83649	6.32019e-06	0.83649	9.76257e-06
0.83893	1.71326e-06	0.83893	6.3446e-06	0.83893	9.8114e-06
0.84137	1.72699e-06	0.84137	6.37512e-06	0.84137	9.82971e-06
0.84381	1.73676e-06	0.84381	6.39648e-06	0.84381	9.87549e-06
0.84625	1.74896e-06	0.84625	6.43616e-06	0.84625	9.8999e-06
0.84869	1.75934e-06	0.84869	6.45752e-06	0.84869	9.95178e-06
0.85114	1.77246e-06	0.85114	6.48804e-06	0.85114	9.97925e-06
0.85358	1.78345e-06	0.85358	6.49414e-06	0.85358	1.00098e-05
0.85602	1.79443e-06	0.85602	6.52161e-06	0.85602	1.00586e-05
0.85846	1.80481e-06	0.85846	6.55212e-06	0.85846	1.01105e-05
0.8609	1.81671e-06	0.8609	6.57959e-06	0.8609	1.01685e-05
0.86334	1.82709e-06	0.86334	6.604e-06	0.86334	1.02234e-05
0.86578	1.83716e-06	0.86578	6.63147e-06	0.86578	1.02661e-05
0.86823	1.84753e-06	0.86823	6.65283e-06	0.86823	1.03088e-05
0.87067	1.85883e-06	0.87067	6.6803e-06	0.87067	1.03394e-05
0.87311	1.86768e-06	0.87311	6.70166e-06	0.87311	1.03485e-05
0.87555	1.87927e-06	0.87555	6.72302e-06	0.87555	1.03729e-05
0.87799	1.88751e-06	0.87799	6.74133e-06	0.87799	1.03638e-05
0.88043	1.89728e-06	0.88043	6.78101e-06	0.88043	1.04065e-05
0.88287	1.90674e-06	0.88287	6.80542e-06	0.88287	1.04523e-05
0.88531	1.91467e-06	0.88531	6.84509e-06	0.88531	1.04675e-05
0.88776	1.92413e-06	0.88776	6.86646e-06	0.88776	1.05194e-05
0.8902	1.93207e-06	0.8902	6.90002e-06	0.8902	1.05255e-05
0.89264	1.93939e-06	0.89264	6.90918e-06	0.89264	1.05377e-05
0.89508	1.94855e-06	0.89508	6.92139e-06	0.89508	1.0556e-05
0.89752	1.95587e-06	0.89752	6.96411e-06	0.89752	1.06018e-05
0.89996	1.96411e-06	0.89996	6.98547e-06	0.89996	1.0614e-05
0.9024	1.97021e-06	0.9024	7.00684e-06	0.9024	1.06567e-05
0.90485	1.97693e-06	0.90485	7.01599e-06	0.90485	1.06873e-05
0.90729	1.98334e-06	0.90729	7.02515e-06	0.90729	1.07422e-05
0.90973	1.98975e-06	0.90973	7.04346e-06	0.90973	1.07605e-05
0.91217	1.99432e-06	0.91217	7.07703e-06	0.91217	1.08093e-05
0.91461	2.00073e-06	0.91461	7.08618e-06	0.91461	1.08429e-05
0.91705	2.00439e-06	0.91705	7.1167e-06	0.91705	1.08643e-05
0.91949	2.00928e-06	0.91949	7.15637e-06	0.91949	1.0907e-05
0.92194	2.01355e-06	0.92194	7.16553e-06	0.92194	1.09344e-05
0.92438	2.0166e-06	0.92438	7.2113e-06	0.92438	1.09863e-05
0.92682	2.02026e-06	0.92682	7.22961e-06	0.92682	1.10046e-05
0.92926	2.02362e-06	0.92926	7.27844e-06	0.92926	1.10565e-05
0.9317	2.02545e-06	0.9317	7.29065e-06	0.9317	1.10626e-05
0.93414	2.02698e-06	0.93414	7.32727e-06	0.93414	1.11176e-05
0.93658	2.02972e-06	0.93658	7.33032e-06	0.93658	1.11481e-05
0.93903	2.03156e-06	0.93903	7.3822e-06	0.93903	1.11511e-05
0.94147	2.03217e-06	0.94147	7.3822e-06	0.94147	1.11847e-05
0.94391	2.034e-06	0.94391	7.40967e-06	0.94391	1.11877e-05
0.94635	2.0343e-06	0.94635	7.43103e-06	0.94635	1.12183e-05
0.94879	2.03461e-06	0.94879	7.46155e-06	0.94879	1.12732e-05
0.95123	2.03461e-06	0.95123	7.50122e-06	0.95123	1.12579e-05
0.95367	2.03339e-06	0.95367	7.53479e-06	0.95367	1.12854e-05
0.95612	2.03278e-06	0.95612	7.547e-06	0.95612	1.13251e-05
0.95856	2.0343e-06	0.95856	7.56531e-06	0.95856	1.13464e-05
0.961	2.03125e-06	0.961	7.57141e-06	0.961	1.13403e-05
0.96344	2.02942e-06	0.96344	7.61108e-06	0.96344	1.13525e-05
0.96588	2.02942e-06	0.96588	7.60803e-06	0.96588	1.13739e-05
0.96832	2.02637e-06	0.96832	7.61414e-06	0.96832	1.14014e-05
0.97076	2.02393e-06	0.97076	7.65076e-06	0.97076	1.14197e-05
0.97321	2.02179e-06	0.97321	7.67822e-06	0.97321	1.14746e-05
0.97565	2.01874e-06	0.97565	7.7301e-06	0.97565	1.15021e-05
0.97809	2.01477e-06	0.97809	7.74841e-06	0.97809	1.15082e-05
0.98053	2.01263e-06	0.98053	7.74536e-06	0.98053	1.15295e-05
0.98297	2.00928e-06	0.98297	7.77893e-06	0.98297	1.15784e-05
0.98541	2.00714e-06	0.98541	7.78809e-06	0.98541	1.1557e-05
0.98785	2.00439e-06	0.98785	7.79419e-06	0.98785	1.16241e-05
0.9903	2.00073e-06	0.9903	7.8064e-06	0.9903	1.16608e-05
0.99274	1.99829e-06	0.99274	7.82471e-06	0.99274	1.1676e-05
0.99518	1.99371e-06	0.99518	7.84607e-06	0.99518	1.17279e-05
0.99762	1.99066e-06	0.99762	7.86133e-06	0.99762	1.17706e-05
1.00006	1.98639e-06	1.00006	7.88879e-06	1.00006	1.17981e-05
1.0025	1.98212e-06	1.0025	7.91626e-06	1.0025	1.18103e-05
1.00494	1.97845e-06	1.00494	7.9071e-06	1.00494	1.18469e-05
1.00739	1.97693e-06	1.00739	7.93457e-06	1.00739	1.18896e-05
1.00983	1.97266e-06	1.00983	7.94067e-06	1.00983	1.19263e-05
1.01227	1.9693e-06	1.01227	7.93762e-06	1.01227	1.19568e-05
1.01471	1.96564e-06	1.01471	7.97424e-06	1.01471	1.19965e-05
1.01715	1.96136e-06	1.01715	7.96814e-06	1.01715	1.20026e-05
1.01959	1.9574e-06	1.01959	7.99561e-06	1.01959	1.20056e-05
1.02203	1.95282e-06	1.02203	7.99866e-06	1.02203	1.20392e-05
1.02448	1.95038e-06	1.02448	8.03528e-06	1.02448	1.20728e-05
1.02692	1.94702e-06	1.02692	8.05054e-06	1.02692	1.21094e-05
1.02936	1.94244e-06	1.02936	8.05969e-06	1.02936	1.21765e-05
1.0318	1.93939e-06	1.0318	8.0658e-06	1.0318	1.22406e-05
1.03424	1.93665e-06	1.03424	8.09021e-06	1.03424	1.22681e-05
1.03668	1.93298e-06	1.03668	8.11462e-06	1.03668	1.23474e-05
1.03912	1.93024e-06	1.03912	8.12988e-06	1.03912	1.23932e-05
1.04156	1.92535e-06	1.04156	8.15735e-06	1.04156	1.24329e-05
1.04401	1.92261e-06	1.04401	8.17871e-06	1.04401	1.25e-05
1.04645	1.92108e-06	1.04645	8.16345e-06	1.04645	1.25305e-05
1.04889	1.91803e-06	1.04889	8.17261e-06	1.04889	1.25732e-05
1.05133	1.91589e-06	1.05133	8.1665e-06	1.05133	1.26251e-05
1.05377	1.91223e-06	1.05377	8.17566e-06	1.05377	1.26465e-05
1.05621	1.90918e-06	1.05621	8.22144e-06	1.05621	1.26831e-05
1.05865	1.90674e-06	1.05865	8.23364e-06	1.05865	1.27197e-05
1.0611	1.90552e-06	1.0611	8.25195e-06	1.0611	1.27777e-05
1.06354	1.90277e-06	1.06354	8.30994e-06	1.06354	1.28082e-05
1.06598	1.90094e-06	1.06598	8.3252e-06	1.06598	1.28265e-05
1.06842	1.8988e-06	1.06842	8.36792e-06	1.06842	1.28571e-05
1.07086	1.89697e-06	1.07086	8.37708e-06	1.07086	1.28693e-05
1.0733	1.89423e-06	1.0733	8.39844e-06	1.0733	1.2912e-05
1.07574	1.89362e-06	1.07574	8.40759e-06	1.07574	1.2912e-05
1.07819	1.89087e-06	1.07819	8.39233e-06	1.07819	1.29456e-05
1.08063	1.88965e-06	1.08063	8.4259e-06	1.08063	1.297e-05
1.08307	1.88721e-06	1.08307	8.42896e-06	1.08307	1.30005e-05
1.08551	1.88721e-06	1.08551	8.45032e-06	1.08551	1.29883e-05
1.08795	1.8866e-06	1.08795	8.45947e-06	1.08795	1.30493e-05
1.09039	1.88599e-06	1.09039	8.48083e-06	1.09039	1.30798e-05
1.09283	1.88263e-06	1.09283	8.48694e-06	1.09283	1.31042e-05
1.09528	1.88293e-06	1.09528	8.5083e-06	1.09528	1.31226e-05
1.09772	1.88202e-06	1.09772	8.52356e-06	1.09772	1.31287e-05
1.10016	1.8811e-06	1.10016	8.5083e-06	1.10016	1.31409e-05
1.1026	1.88049e-06	1.1026	8.53882e-06	1.1026	1.31378e-05
1.10504	1.8811e-06	1.10504	8.55103e-06	1.10504	1.31866e-05
1.10748	1.8808e-06	1.10748	8.57544e-06	1.10748	1.32385e-05
1.10992	1.88049e-06	1.10992	8.56934e-06	1.10992	1.32996e-05
1.11237	1.88019e-06	1.11237	8.57849e-06	1.11237	1.33179e-05
1.11481	1.88171e-06	1.11481	8.55713e-06	1.11481	1.33331e-05
1.11725	1.88049e-06	1.11725	8.56934e-06	1.11725	1.33453e-05
1.11969	1.88171e-06	1.11969	8.57544e-06	1.11969	1.33667e-05
1.12213	1.88202e-06	1.12213	8.58765e-06	1.12213	1.33972e-05
1.12457	1.88293e-06	1.12457	8.63342e-06	1.12457	1.34216e-05
1.12701	1.88416e-06	1.12701	8.63037e-06	1.12701	1.34399e-05
1.12946	1.88538e-06	1.12946	8.65173e-06	1.12946	1.34796e-05
1.1319	1.88629e-06	1.1319	8.68225e-06	1.1319	1.34735e-05
1.13434	1.88751e-06	1.13434	8.66699e-06	1.13434	1.35193e-05
1.13678	1.88904e-06	1.13678	8.6853e-06	1.13678	1.35376e-05
1.13922	1.89026e-06	1.13922	8.70972e-06	1.13922	1.35315e-05
1.14166	1.89148e-06	1.14166	8.6792e-06	1.14166	1.34979e-05
1.1441	1.89392e-06	1.1441	8.70972e-06	1.1441	1.35437e-05
1.14655	1.89575e-06	1.14655	8.71887e-06	1.14655	1.35773e-05
1.14899	1.89758e-06	1.14899	8.72498e-06	1.14899	1.36322e-05
1.15143	1.89941e-06	1.15143	8.72192e-06	1.15143	1.36292e-05
1.15387	1.90277e-06	1.15387	8.75549e-06	1.15387	1.36383e-05
1.15631	1.90613e-06	1.15631	8.7616e-06	1.15631	1.36597e-05
1.15875	1.90765e-06	1.15875	8.77686e-06	1.15875	1.36658e-05
1.16119	1.91132e-06	1.16119	8.77991e-06	1.16119	1.36963e-05
1.16364	1.91437e-06	1.16364	8.75854e-06	1.16364	1.37177e-05
1.16608	1.91772e-06	1.16608	8.7677e-06	1.16608	1.37512e-05
1.16852	1.92169e-06	1.16852	8.75854e-06	1.16852	1.37695e-05
1.17096	1.92596e-06	1.17096	8.7677e-06	1.17096	1.37939e-05
1.1734	1.92902e-06	1.1734	8.78296e-06	1.1734	1.38214e-05
1.17584	1.93268e-06	1.17584	8.80737e-06	1.17584	1.3855e-05
1.17828	1.93787e-06	1.17828	8.84094e-06	1.17828	1.39008e-05
1.18073	1.94214e-06	1.18073	8.8623e-06	1.18073	1.39282e-05
1.18317	1.94702e-06	1.18317	8.87451e-06	1.18317	1.39404e-05
1.18561	1.95129e-06	1.18561	8.88062e-06	1.18561	1.39618e-05
1.18805	1.95648e-06	1.18805	8.91724e-06	1.18805	1.39587e-05
1.19049	1.96075e-06	1.19049	8.91113e-06	1.19049	1.3974e-05
1.19293	1.96594e-06	1.19293	8.91724e-06	1.19293	1.40045e-05
1.19537	1.97052e-06	1.19537	8.91113e-06	1.19537	1.39954e-05
1.19781	1.97693e-06	1.19781	8.94775e-06	1.19781	1.40381e-05
1.20026	1.98242e-06	1.20026	8.94165e-06	1.20026	1.4093e-05
1.2027	1.98914e-06	1.2027	8.96912e-06	1.2027	1.4151e-05
1.20514	1.99402e-06	1.20514	8.99963e-06	1.20514	1.41907e-05
1.20758	2.00256e-06	1.20758	9.01794e-06	1.20758	1.42242e-05
1.21002	2.00928e-06	1.21002	9.01489e-06	1.21002	1.4267e-05
1.21246	2.01752e-06	1.21246	9.01489e-06	1.21246	1.42761e-05
1.2149	2.02362e-06	1.2149	9.04236e-06	1.2149	1.43341e-05
1.21735	2.03033e-06	1.21735	9.04541e-06	1.21735	1.43738e-05
1.21979	2.03888e-06	1.21979	9.05151e-06	1.21979	1.43646e-05
1.22223	2.04651e-06	1.22223	9.05457e-06	1.22223	1.44043e-05
1.22467	2.05414e-06	1.22467	9.06372e-06	1.22467	1.44348e-05
1.22711	2.06238e-06	1.22711	9.04846e-06	1.22711	1.44501e-05
1.22955	2.0697e-06	1.22955	9.05457e-06	1.22955	1.44897e-05
1.23199	2.07977e-06	1.23199	9.08508e-06	1.23199	1.44958e-05
1.23444	2.08771e-06	1.23444	9.1217e-06	1.23444	1.44958e-05
1.23688	2.09656e-06	1.23688	9.14612e-06	1.23688	1.45203e-05
1.23932	2.10571e-06	1.23932	9.17664e-06	1.23932	1.4563e-05
1.24176	2.11456e-06	1.24176	9.17969e-06	1.24176	1.45935e-05
1.2442	2.12372e-06	1.2442	9.19189e-06	1.2442	1.46149e-05
1.24664	2.1347e-06	1.24664	9.22241e-06	1.24664	1.46301e-05
1.24908	2.14386e-06	1.24908	9.24683e-06	1.24908	1.46301e-05
1.25153	2.15424e-06	1.25153	9.24377e-06	1.25153	1.46667e-05
1.25397	2.164e-06	1.25397	9.27734e-06	1.25397	1.47064e-05
1.25641	2.17621e-06	1.25641	9.29565e-06	1.25641	1.47491e-05
1.25885	2.18567e-06	1.25885	9.29871e-06	1.25885	1.47766e-05
1.26129	2.19696e-06	1.26129	9.29871e-06	1.26129	1.48224e-05
1.26373	2.20795e-06	1.26373	9.32922e-06	1.26373	1.48438e-05
1.26617	2.22107e-06	1.26617	9.37805e-06	1.26617	1.48834e-05
1.26862	2.23236e-06	1.26862	9.35974e-06	1.26862	1.48682e-05
1.27106	2.24426e-06	1.27106	9.3689e-06	1.27106	1.49139e-05
1.2735	2.25647e-06	1.2735	9.39941e-06	1.2735	1.49017e-05
1.27594	2.26929e-06	1.27594	9.40857e-06	1.27594	1.49445e-05
1.27838	2.2821e-06	1.27838	9.43604e-06	1.27838	1.49689e-05
1.28082	2.29462e-06	1.28082	9.43298e-06	1.28082	1.49719e-05
1.28326	2.30835e-06	1.28326	9.4635e-06	1.28326	1.50238e-05
1.28571	2.32117e-06	1.28571	9.50012e-06	1.28571	1.50574e-05
1.28815	2.33368e-06	1.28815	9.50317e-06	1.28815	1.51367e-05
1.29059	2.34802e-06	1.29059	9.50012e-06	1.29059	1.51947e-05
1.29303	2.36145e-06	1.29303	9.552e-06	1.29303	1.52344e-05
1.29547	2.37579e-06	1.29547	9.552e-06	1.29547	1.5274e-05
1.29791	2.38922e-06	1.29791	9.552e-06	1.29791	1.5332e-05
1.30035	2.4054e-06	1.30035	9.54895e-06	1.30035	1.52954e-05
1.3028	2.41821e-06	1.3028	9.57031e-06	1.3028	1.53198e-05
1.30524	2.43439e-06	1.30524	9.60693e-06	1.30524	1.53473e-05
1.30768	2.44873e-06	1.30768	9.60388e-06	1.30768	1.53809e-05
1.31012	2.46582e-06	1.31012	9.61304e-06	1.31012	1.53931e-05
1.31256	2.47986e-06	1.31256	9.62524e-06	1.31256	1.54022e-05
1.315	2.49664e-06	1.315	9.63135e-06	1.315	1.54236e-05
1.31744	2.51221e-06	1.31744	9.64966e-06	1.31744	1.54449e-05
1.31989	2.52869e-06	1.31989	9.66492e-06	1.31989	1.54999e-05
1.32233	2.54395e-06	1.32233	9.67102e-06	1.32233	1.55029e-05
1.32477	2.56012e-06	1.32477	9.71985e-06	1.32477	1.55304e-05
1.32721	2.57538e-06	1.32721	9.74731e-06	1.32721	1.55731e-05
1.32965	2.59399e-06	1.32965	9.77173e-06	1.32965	1.55823e-05
1.33209	2.61047e-06	1.33209	9.79919e-06	1.33209	1.56342e-05
1.33453	2.62665e-06	1.33453	9.82361e-06	1.33453	1.56525e-05
1.33698	2.64526e-06	1.33698	9.84802e-06	1.33698	1.57166e-05
1.33942	2.66418e-06	1.33942	9.85107e-06	1.33942	1.57684e-05
1.34186	2.68127e-06	1.34186	9.91821e-06	1.34186	1.58081e-05
1.3443	2.69928e-06	1.3443	9.94263e-06	1.3443	1.58569e-05
1.34674	2.71698e-06	1.34674	9.95483e-06	1.34674	1.58722e-05
1.34918	2.73346e-06	1.34918	1.00098e-05	1.34918	1.58691e-05
1.35162	2.75024e-06	1.35162	1.00555e-05	1.35162	1.59241e-05
1.35406	2.77008e-06	1.35406	1.00891e-05	1.35406	1.59485e-05
1.35651	2.78778e-06	1.35651	1.00922e-05	1.35651	1.59943e-05
1.35895	2.80701e-06	1.35895	1.01135e-05	1.35895	1.60156e-05
1.36139	2.82623e-06	1.36139	1.01013e-05	1.36139	1.60492e-05
1.36383	2.84485e-06	1.36383	1.01105e-05	1.36383	1.60797e-05
1.36627	2.86377e-06	1.36627	1.01135e-05	1.36627	1.61011e-05
1.36871	2.8833e-06	1.36871	1.01624e-05	1.36871	1.61163e-05
1.37115	2.90192e-06	1.37115	1.0141e-05	1.37115	1.61713e-05
1.3736	2.92175e-06	1.3736	1.01624e-05	1.3736	1.61987e-05
1.37604	2.94189e-06	1.37604	1.01959e-05	1.37604	1.62048e-05
1.37848	2.96204e-06	1.37848	1.02264e-05	1.37848	1.62445e-05
1.38092	2.98096e-06	1.38092	1.02325e-05	1.38092	1.62811e-05
1.38336	3.00171e-06	1.38336	1.02814e-05	1.38336	1.63177e-05
1.3858	3.02307e-06	1.3858	1.03302e-05	1.3858	1.63116e-05
1.38824	3.0426e-06	1.38824	1.0379e-05	1.38824	1.63361e-05
1.39069	3.06274e-06	1.39069	1.04034e-05	1.39069	1.63452e-05
1.39313	3.08319e-06	1.39313	1.04126e-05	1.39313	1.6391e-05
1.39557	3.10394e-06	1.39557	1.0434e-05	1.39557	1.64215e-05
1.39801	3.12592e-06	1.39801	1.04645e-05	1.39801	1.64337e-05
1.40045	3.14636e-06	1.40045	1.04858e-05	1.40045	1.64795e-05
1.40289	3.16925e-06	1.40289	1.05011e-05	1.40289	1.65375e-05
1.40533	3.19061e-06	1.40533	1.05011e-05	1.40533	1.65771e-05
1.40778	3.21228e-06	1.40778	1.05347e-05	1.40778	1.65894e-05
1.41022	3.23273e-06	1.41022	1.05591e-05	1.41022	1.66229e-05
1.41266	3.25592e-06	1.41266	1.05682e-05	1.41266	1.66565e-05
1.4151	3.2785e-06	1.4151	1.05896e-05	1.4151	1.66962e-05
1.41754	3.30109e-06	1.41754	1.06415e-05	1.41754	1.67389e-05
1.41998	3.32397e-06	1.41998	1.06659e-05	1.41998	1.67328e-05
1.42242	3.34717e-06	1.42242	1.0675e-05	1.42242	1.6803e-05
1.42487	3.37006e-06	1.42487	1.06903e-05	1.42487	1.67938e-05
1.42731	3.39325e-06	1.42731	1.07025e-05	1.42731	1.68243e-05
1.42975	3.41583e-06	1.42975	1.07178e-05	1.42975	1.68396e-05
1.43219	3.43964e-06	1.43219	1.07452e-05	1.43219	1.6861e-05
1.43463	3.46252e-06	1.43463	1.07758e-05	1.43463	1.69098e-05
1.43707	3.48877e-06	1.43707	1.08093e-05	1.43707	1.69312e-05
1.43951	3.51227e-06	1.43951	1.08154e-05	1.43951	1.69556e-05
1.44196	3.53668e-06	1.44196	1.08551e-05	1.44196	1.69861e-05
1.4444	3.55957e-06	1.4444	1.08673e-05	1.4444	1.70074e-05
1.44684	3.58521e-06	1.44684	1.0907e-05	1.44684	1.70624e-05
1.44928	3.61023e-06	1.44928	1.09375e-05	1.44928	1.70441e-05
1.45172	3.63434e-06	1.45172	1.09924e-05	1.45172	1.71082e-05
1.45416	3.66028e-06	1.45416	1.10168e-05	1.45416	1.71783e-05
1.4566	3.68591e-06	1.4566	1.10443e-05	1.4566	1.71631e-05
1.45905	3.7085e-06	1.45905	1.1084e-05	1.45905	1.72119e-05
1.46149	3.73657e-06	1.46149	1.11206e-05	1.46149	1.72729e-05
1.46393	3.76068e-06	1.46393	1.11633e-05	1.46393	1.73279e-05
1.46637	3.78815e-06	1.46637	1.11816e-05	1.46637	1.73279e-05
1.46881	3.81561e-06	1.46881	1.1203e-05	1.46881	1.74011e-05
1.47125	3.84125e-06	1.47125	1.12366e-05	1.47125	1.74072e-05
1.47369	3.86932e-06	1.47369	1.1261e-05	1.47369	1.73798e-05
1.47614	3.89679e-06	1.47614	1.12976e-05	1.47614	1.74744e-05
1.47858	3.92273e-06	1.47858	1.1322e-05	1.47858	1.74896e-05
1.48102	3.95081e-06	1.48102	1.13739e-05	1.48102	1.7514e-05
1.48346	3.97858e-06	1.48346	1.1377e-05	1.48346	1.7569e-05
1.4859	4.00665e-06	1.4859	1.13953e-05	1.4859	1.75873e-05
1.48834	4.03412e-06	1.48834	1.14441e-05	1.48834	1.76666e-05
1.49078	4.06433e-06	1.49078	1.14502e-05	1.49078	1.77002e-05
1.49323	4.08936e-06	1.49323	1.14624e-05	1.49323	1.77032e-05
1.49567	4.11987e-06	1.49567	1.15326e-05	1.49567	1.77856e-05
1.49811	4.14642e-06	1.49811	1.1554e-05	1.49811	1.7804e-05
1.50055	4.17542e-06	1.50055	1.15936e-05	1.50055	1.77551e-05
