# Supplementary material for: In-depth chiral sensing capability of C-dots in a biomimetic protein-based hydrogel: a probe for chiral recognition applications
Source: Royal Society of Chemistry journal article supplement (doi:10.1039/d5bm01508a), 2026-01-01
Supplement: d5bm01508a1.zip [file Figure S9.xlsx]

## Sheet: Figure S10(a)
-1.4975	-9.99969e-06	-1.4975	-9.99969e-06	-1.4975	-9.99969e-06
-1.49506	-3.12592e-05	-1.49506	-3.66791e-05	-1.49506	-6.20178e-05
-1.49261	-2.70599e-05	-1.49261	-3.28522e-05	-1.49261	-5.58167e-05
-1.49017	-2.42615e-05	-1.49017	-3.02673e-05	-1.49017	-5.14221e-05
-1.48773	-2.2226e-05	-1.48773	-2.83356e-05	-1.48773	-4.81415e-05
-1.48529	-2.06696e-05	-1.48529	-2.68219e-05	-1.48529	-4.55048e-05
-1.48285	-1.94214e-05	-1.48285	-2.55798e-05	-1.48285	-4.33197e-05
-1.48041	-1.84052e-05	-1.48041	-2.4527e-05	-1.48041	-4.14764e-05
-1.47797	-1.75446e-05	-1.47797	-2.36176e-05	-1.47797	-3.98804e-05
-1.47552	-1.67938e-05	-1.47552	-2.2818e-05	-1.47552	-3.82874e-05
-1.47308	-1.61377e-05	-1.47308	-2.21008e-05	-1.47308	-3.7027e-05
-1.47064	-1.55579e-05	-1.47064	-2.14539e-05	-1.47064	-3.59039e-05
-1.4682	-1.5033e-05	-1.4682	-2.08679e-05	-1.4682	-3.48663e-05
-1.46576	-1.4566e-05	-1.46576	-2.03308e-05	-1.46576	-3.39264e-05
-1.46332	-1.41266e-05	-1.46332	-1.98303e-05	-1.46332	-3.30475e-05
-1.46088	-1.37268e-05	-1.46088	-1.93726e-05	-1.46088	-3.22388e-05
-1.45844	-1.33514e-05	-1.45844	-1.89423e-05	-1.45844	-3.14819e-05
-1.45599	-1.30035e-05	-1.45599	-1.85333e-05	-1.45599	-3.07709e-05
-1.45355	-1.26801e-05	-1.45355	-1.81458e-05	-1.45355	-3.00995e-05
-1.45111	-1.2381e-05	-1.45111	-1.77917e-05	-1.45111	-2.94678e-05
-1.44867	-1.2088e-05	-1.44867	-1.74469e-05	-1.44867	-2.88605e-05
-1.44623	-1.18225e-05	-1.44623	-1.71204e-05	-1.44623	-2.8299e-05
-1.44379	-1.15601e-05	-1.44379	-1.68121e-05	-1.44379	-2.77496e-05
-1.44135	-1.1319e-05	-1.44135	-1.651e-05	-1.44135	-2.72369e-05
-1.4389	-1.1084e-05	-1.4389	-1.62262e-05	-1.4389	-2.67395e-05
-1.43646	-1.08551e-05	-1.43646	-1.59546e-05	-1.43646	-2.62665e-05
-1.43402	-1.06323e-05	-1.43402	-1.5686e-05	-1.43402	-2.58057e-05
-1.43158	-1.04248e-05	-1.43158	-1.54358e-05	-1.43158	-2.53723e-05
-1.42914	-1.02203e-05	-1.42914	-1.51917e-05	-1.42914	-2.4942e-05
-1.4267	-1.00372e-05	-1.4267	-1.49536e-05	-1.4267	-2.45392e-05
-1.42426	-9.86023e-06	-1.42426	-1.47247e-05	-1.42426	-2.41425e-05
-1.42181	-9.69543e-06	-1.42181	-1.45081e-05	-1.42181	-2.3764e-05
-1.41937	-9.52454e-06	-1.41937	-1.42944e-05	-1.41937	-2.33948e-05
-1.41693	-9.35974e-06	-1.41693	-1.40869e-05	-1.41693	-2.30377e-05
-1.41449	-9.198e-06	-1.41449	-1.38824e-05	-1.41449	-2.26837e-05
-1.41205	-9.03931e-06	-1.41205	-1.36902e-05	-1.41205	-2.23541e-05
-1.40961	-8.88977e-06	-1.40961	-1.34949e-05	-1.40961	-2.20215e-05
-1.40717	-8.75854e-06	-1.40717	-1.33087e-05	-1.40717	-2.17041e-05
-1.40472	-8.63342e-06	-1.40472	-1.31256e-05	-1.40472	-2.13959e-05
-1.40228	-8.51135e-06	-1.40228	-1.29456e-05	-1.40228	-2.10938e-05
-1.39984	-8.38318e-06	-1.39984	-1.27716e-05	-1.39984	-2.08008e-05
-1.3974	-8.26416e-06	-1.3974	-1.26007e-05	-1.3974	-2.05109e-05
-1.39496	-8.13904e-06	-1.39496	-1.24298e-05	-1.39496	-2.02271e-05
-1.39252	-8.02002e-06	-1.39252	-1.22681e-05	-1.39252	-1.99554e-05
-1.39008	-7.901e-06	-1.39008	-1.21063e-05	-1.39008	-1.96808e-05
-1.38763	-7.78503e-06	-1.38763	-1.19507e-05	-1.38763	-1.94244e-05
-1.38519	-7.67822e-06	-1.38519	-1.17981e-05	-1.38519	-1.91681e-05
-1.38275	-7.57446e-06	-1.38275	-1.16486e-05	-1.38275	-1.89178e-05
-1.38031	-7.4707e-06	-1.38031	-1.15051e-05	-1.38031	-1.86737e-05
-1.37787	-7.37305e-06	-1.37787	-1.13586e-05	-1.37787	-1.84326e-05
-1.37543	-7.27539e-06	-1.37543	-1.12152e-05	-1.37543	-1.81946e-05
-1.37299	-7.17773e-06	-1.37299	-1.10809e-05	-1.37299	-1.79657e-05
-1.37054	-7.08008e-06	-1.37054	-1.09406e-05	-1.37054	-1.77368e-05
-1.3681	-6.98242e-06	-1.3681	-1.08124e-05	-1.3681	-1.75171e-05
-1.36566	-6.88782e-06	-1.36566	-1.06781e-05	-1.36566	-1.72943e-05
-1.36322	-6.80542e-06	-1.36322	-1.0553e-05	-1.36322	-1.70837e-05
-1.36078	-6.72607e-06	-1.36078	-1.04279e-05	-1.36078	-1.68732e-05
-1.35834	-6.63757e-06	-1.35834	-1.03088e-05	-1.35834	-1.66656e-05
-1.3559	-6.55212e-06	-1.3559	-1.01868e-05	-1.3559	-1.64581e-05
-1.35345	-6.47278e-06	-1.35345	-1.00739e-05	-1.35345	-1.62628e-05
-1.35101	-6.39648e-06	-1.35101	-9.95789e-06	-1.35101	-1.60614e-05
-1.34857	-6.32324e-06	-1.34857	-9.84802e-06	-1.34857	-1.58722e-05
-1.34613	-6.24695e-06	-1.34613	-9.729e-06	-1.34613	-1.56769e-05
-1.34369	-6.17371e-06	-1.34369	-9.62524e-06	-1.34369	-1.54907e-05
-1.34125	-6.10352e-06	-1.34125	-9.51233e-06	-1.34125	-1.53076e-05
-1.33881	-6.03027e-06	-1.33881	-9.40247e-06	-1.33881	-1.51245e-05
-1.33636	-5.96008e-06	-1.33636	-9.2926e-06	-1.33636	-1.49445e-05
-1.33392	-5.896e-06	-1.33392	-9.18579e-06	-1.33392	-1.47736e-05
-1.33148	-5.82886e-06	-1.33148	-9.08203e-06	-1.33148	-1.45996e-05
-1.32904	-5.76477e-06	-1.32904	-8.98132e-06	-1.32904	-1.44318e-05
-1.3266	-5.70068e-06	-1.3266	-8.87756e-06	-1.3266	-1.42609e-05
-1.32416	-5.6366e-06	-1.32416	-8.77686e-06	-1.32416	-1.4093e-05
-1.32172	-5.57861e-06	-1.32172	-8.6792e-06	-1.32172	-1.39282e-05
-1.31927	-5.52673e-06	-1.31927	-8.58154e-06	-1.31927	-1.37665e-05
-1.31683	-5.4718e-06	-1.31683	-8.48389e-06	-1.31683	-1.36047e-05
-1.31439	-5.41382e-06	-1.31439	-8.38623e-06	-1.31439	-1.3446e-05
-1.31195	-5.34973e-06	-1.31195	-8.29163e-06	-1.31195	-1.32904e-05
-1.30951	-5.2948e-06	-1.30951	-8.20007e-06	-1.30951	-1.31439e-05
-1.30707	-5.24292e-06	-1.30707	-8.10547e-06	-1.30707	-1.29913e-05
-1.30463	-5.19409e-06	-1.30463	-8.01697e-06	-1.30463	-1.28448e-05
-1.30219	-5.14221e-06	-1.30219	-7.92542e-06	-1.30219	-1.26953e-05
-1.29974	-5.09033e-06	-1.29974	-7.83691e-06	-1.29974	-1.25549e-05
-1.2973	-5.0354e-06	-1.2973	-7.74841e-06	-1.2973	-1.24084e-05
-1.29486	-4.98352e-06	-1.29486	-7.66602e-06	-1.29486	-1.22681e-05
-1.29242	-4.93774e-06	-1.29242	-7.57751e-06	-1.29242	-1.21277e-05
-1.28998	-4.90112e-06	-1.28998	-7.49512e-06	-1.28998	-1.19904e-05
-1.28754	-4.8584e-06	-1.28754	-7.41272e-06	-1.28754	-1.18561e-05
-1.2851	-4.81567e-06	-1.2851	-7.33032e-06	-1.2851	-1.17249e-05
-1.28265	-4.77051e-06	-1.28265	-7.25098e-06	-1.28265	-1.15936e-05
-1.28021	-4.72748e-06	-1.28021	-7.16858e-06	-1.28021	-1.14624e-05
-1.27777	-4.68201e-06	-1.27777	-7.08923e-06	-1.27777	-1.13312e-05
-1.27533	-4.63806e-06	-1.27533	-7.00989e-06	-1.27533	-1.12061e-05
-1.27289	-4.59167e-06	-1.27289	-6.93054e-06	-1.27289	-1.10748e-05
-1.27045	-4.55048e-06	-1.27045	-6.8573e-06	-1.27045	-1.09528e-05
-1.26801	-4.50623e-06	-1.26801	-6.77795e-06	-1.26801	-1.08276e-05
-1.26556	-4.46472e-06	-1.26556	-6.70471e-06	-1.26556	-1.07086e-05
-1.26312	-4.42352e-06	-1.26312	-6.63147e-06	-1.26312	-1.05865e-05
-1.26068	-4.38232e-06	-1.26068	-6.55518e-06	-1.26068	-1.04675e-05
-1.25824	-4.34448e-06	-1.25824	-6.47888e-06	-1.25824	-1.03455e-05
-1.2558	-4.30878e-06	-1.2558	-6.40564e-06	-1.2558	-1.02325e-05
-1.25336	-4.27063e-06	-1.25336	-6.3324e-06	-1.25336	-1.01135e-05
-1.25092	-4.2334e-06	-1.25092	-6.26221e-06	-1.25092	-1.00006e-05
-1.24847	-4.19861e-06	-1.24847	-6.19202e-06	-1.24847	-9.8877e-06
-1.24603	-4.16199e-06	-1.24603	-6.12183e-06	-1.24603	-9.77783e-06
-1.24359	-4.12811e-06	-1.24359	-6.05164e-06	-1.24359	-9.66797e-06
-1.24115	-4.09149e-06	-1.24115	-5.9845e-06	-1.24115	-9.55505e-06
-1.23871	-4.05609e-06	-1.23871	-5.91431e-06	-1.23871	-9.44519e-06
-1.23627	-4.02191e-06	-1.23627	-5.85022e-06	-1.23627	-9.33838e-06
-1.23383	-3.98682e-06	-1.23383	-5.78308e-06	-1.23383	-9.22852e-06
-1.23138	-3.95538e-06	-1.23138	-5.71899e-06	-1.23138	-9.12476e-06
-1.22894	-3.92242e-06	-1.22894	-5.65491e-06	-1.22894	-9.01794e-06
-1.2265	-3.88702e-06	-1.2265	-5.58777e-06	-1.2265	-8.91113e-06
-1.22406	-3.85254e-06	-1.22406	-5.52979e-06	-1.22406	-8.81042e-06
-1.22162	-3.81866e-06	-1.22162	-5.4657e-06	-1.22162	-8.70667e-06
-1.21918	-3.78601e-06	-1.21918	-5.40161e-06	-1.21918	-8.60291e-06
-1.21674	-3.75305e-06	-1.21674	-5.34363e-06	-1.21674	-8.50525e-06
-1.21429	-3.72375e-06	-1.21429	-5.27954e-06	-1.21429	-8.40149e-06
-1.21185	-3.69812e-06	-1.21185	-5.22461e-06	-1.21185	-8.30383e-06
-1.20941	-3.67126e-06	-1.20941	-5.16357e-06	-1.20941	-8.20313e-06
-1.20697	-3.64502e-06	-1.20697	-5.10254e-06	-1.20697	-8.10547e-06
-1.20453	-3.61633e-06	-1.20453	-5.0415e-06	-1.20453	-8.00781e-06
-1.20209	-3.591e-06	-1.20209	-4.98657e-06	-1.20209	-7.9071e-06
-1.19965	-3.56567e-06	-1.19965	-4.92554e-06	-1.19965	-7.80945e-06
-1.1972	-3.54095e-06	-1.1972	-4.86755e-06	-1.1972	-7.7179e-06
-1.19476	-3.51257e-06	-1.19476	-4.81262e-06	-1.19476	-7.61719e-06
-1.19232	-3.48816e-06	-1.19232	-4.76013e-06	-1.19232	-7.52258e-06
-1.18988	-3.46069e-06	-1.18988	-4.69879e-06	-1.18988	-7.42493e-06
-1.18744	-3.43597e-06	-1.18744	-4.64233e-06	-1.18744	-7.33337e-06
-1.185	-3.41187e-06	-1.185	-4.5874e-06	-1.185	-7.23877e-06
-1.18256	-3.38593e-06	-1.18256	-4.53094e-06	-1.18256	-7.14417e-06
-1.18011	-3.36395e-06	-1.18011	-4.47601e-06	-1.18011	-7.05261e-06
-1.17767	-3.34045e-06	-1.17767	-4.4223e-06	-1.17767	-6.96411e-06
-1.17523	-3.31696e-06	-1.17523	-4.3689e-06	-1.17523	-6.86951e-06
-1.17279	-3.29468e-06	-1.17279	-4.3161e-06	-1.17279	-6.78101e-06
-1.17035	-3.27576e-06	-1.17035	-4.26086e-06	-1.17035	-6.68945e-06
-1.16791	-3.25317e-06	-1.16791	-4.20929e-06	-1.16791	-6.60095e-06
-1.16547	-3.23181e-06	-1.16547	-4.15619e-06	-1.16547	-6.51245e-06
-1.16302	-3.21136e-06	-1.16302	-4.10553e-06	-1.16302	-6.42395e-06
-1.16058	-3.18939e-06	-1.16058	-4.05151e-06	-1.16058	-6.3385e-06
-1.15814	-3.16711e-06	-1.15814	-4.00391e-06	-1.15814	-6.25305e-06
-1.1557	-3.14789e-06	-1.1557	-3.95142e-06	-1.1557	-6.16455e-06
-1.15326	-3.12439e-06	-1.15326	-3.90076e-06	-1.15326	-6.08215e-06
-1.15082	-3.10303e-06	-1.15082	-3.84949e-06	-1.15082	-5.99365e-06
-1.14838	-3.0835e-06	-1.14838	-3.80005e-06	-1.14838	-5.91125e-06
-1.14594	-3.06305e-06	-1.14594	-3.75031e-06	-1.14594	-5.82886e-06
-1.14349	-3.04657e-06	-1.14349	-3.70056e-06	-1.14349	-5.74341e-06
-1.14105	-3.02368e-06	-1.14105	-3.65204e-06	-1.14105	-5.65796e-06
-1.13861	-3.00476e-06	-1.13861	-3.60504e-06	-1.13861	-5.57861e-06
-1.13617	-2.98492e-06	-1.13617	-3.55652e-06	-1.13617	-5.49622e-06
-1.13373	-2.96478e-06	-1.13373	-3.51135e-06	-1.13373	-5.41687e-06
-1.13129	-2.94586e-06	-1.13129	-3.46405e-06	-1.13129	-5.33447e-06
-1.12885	-2.92694e-06	-1.12885	-3.41888e-06	-1.12885	-5.25818e-06
-1.1264	-2.90924e-06	-1.1264	-3.37128e-06	-1.1264	-5.17578e-06
-1.12396	-2.89032e-06	-1.12396	-3.32581e-06	-1.12396	-5.09949e-06
-1.12152	-2.87018e-06	-1.12152	-3.28186e-06	-1.12152	-5.01709e-06
-1.11908	-2.85126e-06	-1.11908	-3.23975e-06	-1.11908	-4.9408e-06
-1.11664	-2.83173e-06	-1.11664	-3.19489e-06	-1.11664	-4.8645e-06
-1.1142	-2.81311e-06	-1.1142	-3.15491e-06	-1.1142	-4.79126e-06
-1.11176	-2.79236e-06	-1.11176	-3.11127e-06	-1.11176	-4.72046e-06
-1.10931	-2.77374e-06	-1.10931	-3.06763e-06	-1.10931	-4.6463e-06
-1.10687	-2.76062e-06	-1.10687	-3.02704e-06	-1.10687	-4.57001e-06
-1.10443	-2.7417e-06	-1.10443	-2.98523e-06	-1.10443	-4.4986e-06
-1.10199	-2.72522e-06	-1.10199	-2.94617e-06	-1.10199	-4.42535e-06
-1.09955	-2.71057e-06	-1.09955	-2.90527e-06	-1.09955	-4.3573e-06
-1.09711	-2.69562e-06	-1.09711	-2.8656e-06	-1.09711	-4.28558e-06
-1.09467	-2.68036e-06	-1.09467	-2.82593e-06	-1.09467	-4.21722e-06
-1.09222	-2.66235e-06	-1.09222	-2.78625e-06	-1.09222	-4.14795e-06
-1.08978	-2.64893e-06	-1.08978	-2.74872e-06	-1.08978	-4.08173e-06
-1.08734	-2.63367e-06	-1.08734	-2.71088e-06	-1.08734	-4.01489e-06
-1.0849	-2.61841e-06	-1.0849	-2.67487e-06	-1.0849	-3.94867e-06
-1.08246	-2.59857e-06	-1.08246	-2.63672e-06	-1.08246	-3.88153e-06
-1.08002	-2.58545e-06	-1.08002	-2.60071e-06	-1.08002	-3.81866e-06
-1.07758	-2.57019e-06	-1.07758	-2.56287e-06	-1.07758	-3.75458e-06
-1.07513	-2.55646e-06	-1.07513	-2.52747e-06	-1.07513	-3.69293e-06
-1.07269	-2.54303e-06	-1.07269	-2.49176e-06	-1.07269	-3.62976e-06
-1.07025	-2.52686e-06	-1.07025	-2.4588e-06	-1.07025	-3.57117e-06
-1.06781	-2.51251e-06	-1.06781	-2.4234e-06	-1.06781	-3.51318e-06
-1.06537	-2.49786e-06	-1.06537	-2.38922e-06	-1.06537	-3.45551e-06
-1.06293	-2.48413e-06	-1.06293	-2.35352e-06	-1.06293	-3.3963e-06
-1.06049	-2.47131e-06	-1.06049	-2.32269e-06	-1.06049	-3.34106e-06
-1.05804	-2.4585e-06	-1.05804	-2.29065e-06	-1.05804	-3.28613e-06
-1.0556	-2.44507e-06	-1.0556	-2.25952e-06	-1.0556	-3.2312e-06
-1.05316	-2.43134e-06	-1.05316	-2.22656e-06	-1.05316	-3.17688e-06
-1.05072	-2.42035e-06	-1.05072	-2.19696e-06	-1.05072	-3.12378e-06
-1.04828	-2.40814e-06	-1.04828	-2.16766e-06	-1.04828	-3.07404e-06
-1.04584	-2.39563e-06	-1.04584	-2.13837e-06	-1.04584	-3.01971e-06
-1.0434	-2.37885e-06	-1.0434	-2.1106e-06	-1.0434	-2.96661e-06
-1.04095	-2.36542e-06	-1.04095	-2.08069e-06	-1.04095	-2.91718e-06
-1.03851	-2.35046e-06	-1.03851	-2.05048e-06	-1.03851	-2.86743e-06
-1.03607	-2.33734e-06	-1.03607	-2.02484e-06	-1.03607	-2.81738e-06
-1.03363	-2.32422e-06	-1.03363	-1.99707e-06	-1.03363	-2.76733e-06
-1.03119	-2.3114e-06	-1.03119	-1.97235e-06	-1.03119	-2.72034e-06
-1.02875	-2.29797e-06	-1.02875	-1.9458e-06	-1.02875	-2.67212e-06
-1.02631	-2.28699e-06	-1.02631	-1.91833e-06	-1.02631	-2.62482e-06
-1.02386	-2.27142e-06	-1.02386	-1.89362e-06	-1.02386	-2.57782e-06
-1.02142	-2.25922e-06	-1.02142	-1.86798e-06	-1.02142	-2.53418e-06
-1.01898	-2.2464e-06	-1.01898	-1.84113e-06	-1.01898	-2.48901e-06
-1.01654	-2.23236e-06	-1.01654	-1.81854e-06	-1.01654	-2.44476e-06
-1.0141	-2.21893e-06	-1.0141	-1.79321e-06	-1.0141	-2.3999e-06
-1.01166	-2.20459e-06	-1.01166	-1.77094e-06	-1.01166	-2.35779e-06
-1.00922	-2.19116e-06	-1.00922	-1.74683e-06	-1.00922	-2.31506e-06
-1.00677	-2.18109e-06	-1.00677	-1.72424e-06	-1.00677	-2.27295e-06
-1.00433	-2.16766e-06	-1.00433	-1.70135e-06	-1.00433	-2.23145e-06
-1.00189	-2.15607e-06	-1.00189	-1.67938e-06	-1.00189	-2.19238e-06
-0.99945	-2.14325e-06	-0.99945	-1.6568e-06	-0.99945	-2.15057e-06
-0.99701	-2.13196e-06	-0.99701	-1.63635e-06	-0.99701	-2.11212e-06
-0.99457	-2.11945e-06	-0.99457	-1.61285e-06	-0.99457	-2.07275e-06
-0.99213	-2.10785e-06	-0.99213	-1.59393e-06	-0.99213	-2.03522e-06
-0.98969	-2.09595e-06	-0.98969	-1.57166e-06	-0.98969	-1.9986e-06
-0.98724	-2.08771e-06	-0.98724	-1.55121e-06	-0.98724	-1.96259e-06
-0.9848	-2.07794e-06	-0.9848	-1.53107e-06	-0.9848	-1.92566e-06
-0.98236	-2.06665e-06	-0.98236	-1.51276e-06	-0.98236	-1.89178e-06
-0.97992	-2.05505e-06	-0.97992	-1.49261e-06	-0.97992	-1.85516e-06
-0.97748	-2.04407e-06	-0.97748	-1.47278e-06	-0.97748	-1.82281e-06
-0.97504	-2.03278e-06	-0.97504	-1.45355e-06	-0.97504	-1.78925e-06
-0.9726	-2.02332e-06	-0.9726	-1.43402e-06	-0.9726	-1.75568e-06
-0.97015	-2.01416e-06	-0.97015	-1.41449e-06	-0.97015	-1.72302e-06
-0.96771	-2.00348e-06	-0.96771	-1.39526e-06	-0.96771	-1.69312e-06
-0.96527	-1.99188e-06	-0.96527	-1.37756e-06	-0.96527	-1.66077e-06
-0.96283	-1.97968e-06	-0.96283	-1.36047e-06	-0.96283	-1.62994e-06
-0.96039	-1.96686e-06	-0.96039	-1.33942e-06	-0.96039	-1.59912e-06
-0.95795	-1.95648e-06	-0.95795	-1.32599e-06	-0.95795	-1.57074e-06
-0.95551	-1.94489e-06	-0.95551	-1.30798e-06	-0.95551	-1.54114e-06
-0.95306	-1.93512e-06	-0.95306	-1.29028e-06	-0.95306	-1.51215e-06
-0.95062	-1.92352e-06	-0.95062	-1.2738e-06	-0.95062	-1.48376e-06
-0.94818	-1.91406e-06	-0.94818	-1.25885e-06	-0.94818	-1.45569e-06
-0.94574	-1.90521e-06	-0.94574	-1.2442e-06	-0.94574	-1.42975e-06
-0.9433	-1.89453e-06	-0.9433	-1.22772e-06	-0.9433	-1.40259e-06
-0.94086	-1.88385e-06	-0.94086	-1.21155e-06	-0.94086	-1.37451e-06
-0.93842	-1.87531e-06	-0.93842	-1.19659e-06	-0.93842	-1.35101e-06
-0.93597	-1.86707e-06	-0.93597	-1.18134e-06	-0.93597	-1.32507e-06
-0.93353	-1.85455e-06	-0.93353	-1.16791e-06	-0.93353	-1.29883e-06
-0.93109	-1.84509e-06	-0.93109	-1.15173e-06	-0.93109	-1.27441e-06
-0.92865	-1.83319e-06	-0.92865	-1.1377e-06	-0.92865	-1.25e-06
-0.92621	-1.82465e-06	-0.92621	-1.12488e-06	-0.92621	-1.2262e-06
-0.92377	-1.81519e-06	-0.92377	-1.11084e-06	-0.92377	-1.20331e-06
-0.92133	-1.80359e-06	-0.92133	-1.09589e-06	-0.92133	-1.17859e-06
-0.91888	-1.79169e-06	-0.91888	-1.08368e-06	-0.91888	-1.15692e-06
-0.91644	-1.78375e-06	-0.91644	-1.06964e-06	-0.91644	-1.13525e-06
-0.914	-1.7749e-06	-0.914	-1.05652e-06	-0.914	-1.11542e-06
-0.91156	-1.76514e-06	-0.91156	-1.04279e-06	-0.91156	-1.09253e-06
-0.90912	-1.75629e-06	-0.90912	-1.02997e-06	-0.90912	-1.07147e-06
-0.90668	-1.74591e-06	-0.90668	-1.01654e-06	-0.90668	-1.05103e-06
-0.90424	-1.73553e-06	-0.90424	-1.00555e-06	-0.90424	-1.03241e-06
-0.90179	-1.72607e-06	-0.90179	-9.94873e-07	-0.90179	-1.01044e-06
-0.89935	-1.71539e-06	-0.89935	-9.8114e-07	-0.89935	-9.92737e-07
-0.89691	-1.70624e-06	-0.89691	-9.69849e-07	-0.89691	-9.72595e-07
-0.89447	-1.69617e-06	-0.89447	-9.59473e-07	-0.89447	-9.53979e-07
-0.89203	-1.68579e-06	-0.89203	-9.47266e-07	-0.89203	-9.36584e-07
-0.88959	-1.67816e-06	-0.88959	-9.35364e-07	-0.88959	-9.18579e-07
-0.88715	-1.6687e-06	-0.88715	-9.23157e-07	-0.88715	-8.99658e-07
-0.8847	-1.6568e-06	-0.8847	-9.13086e-07	-0.8847	-8.83179e-07
-0.88226	-1.64673e-06	-0.88226	-9.01489e-07	-0.88226	-8.65784e-07
-0.87982	-1.63757e-06	-0.87982	-8.91418e-07	-0.87982	-8.5022e-07
-0.87738	-1.62872e-06	-0.87738	-8.80432e-07	-0.87738	-8.34656e-07
-0.87494	-1.61926e-06	-0.87494	-8.69751e-07	-0.87494	-8.17871e-07
-0.8725	-1.60706e-06	-0.8725	-8.60291e-07	-0.8725	-8.02307e-07
-0.87006	-1.59912e-06	-0.87006	-8.48389e-07	-0.87006	-7.85828e-07
-0.86761	-1.58966e-06	-0.86761	-8.40149e-07	-0.86761	-7.69348e-07
-0.86517	-1.58142e-06	-0.86517	-8.30078e-07	-0.86517	-7.56531e-07
-0.86273	-1.57257e-06	-0.86273	-8.19397e-07	-0.86273	-7.40356e-07
-0.86029	-1.56342e-06	-0.86029	-8.11768e-07	-0.86029	-7.28455e-07
-0.85785	-1.55426e-06	-0.85785	-8.02307e-07	-0.85785	-7.13196e-07
-0.85541	-1.54297e-06	-0.85541	-7.91931e-07	-0.85541	-6.97632e-07
-0.85297	-1.53564e-06	-0.85297	-7.84607e-07	-0.85297	-6.82983e-07
-0.85052	-1.52588e-06	-0.85052	-7.74841e-07	-0.85052	-6.70776e-07
-0.84808	-1.51703e-06	-0.84808	-7.64771e-07	-0.84808	-6.5979e-07
-0.84564	-1.5094e-06	-0.84564	-7.58362e-07	-0.84564	-6.45447e-07
-0.8432	-1.49902e-06	-0.8432	-7.47375e-07	-0.8432	-6.32324e-07
-0.84076	-1.49017e-06	-0.84076	-7.40051e-07	-0.84076	-6.21643e-07
-0.83832	-1.47827e-06	-0.83832	-7.32727e-07	-0.83832	-6.07605e-07
-0.83588	-1.47125e-06	-0.83588	-7.25098e-07	-0.83588	-5.96619e-07
-0.83344	-1.46149e-06	-0.83344	-7.18384e-07	-0.83344	-5.84717e-07
-0.83099	-1.45233e-06	-0.83099	-7.09534e-07	-0.83099	-5.73425e-07
-0.82855	-1.44409e-06	-0.82855	-7.02209e-07	-0.82855	-5.62744e-07
-0.82611	-1.43524e-06	-0.82611	-6.95496e-07	-0.82611	-5.51758e-07
-0.82367	-1.42517e-06	-0.82367	-6.84814e-07	-0.82367	-5.38025e-07
-0.82123	-1.41571e-06	-0.82123	-6.82068e-07	-0.82123	-5.2887e-07
-0.81879	-1.40594e-06	-0.81879	-6.71997e-07	-0.81879	-5.17578e-07
-0.81635	-1.40015e-06	-0.81635	-6.66199e-07	-0.81635	-5.07202e-07
-0.8139	-1.39008e-06	-0.8139	-6.60095e-07	-0.8139	-4.95605e-07
-0.81146	-1.38153e-06	-0.81146	-6.53076e-07	-0.81146	-4.86755e-07
-0.80902	-1.37115e-06	-0.80902	-6.45752e-07	-0.80902	-4.76074e-07
-0.80658	-1.36292e-06	-0.80658	-6.40564e-07	-0.80658	-4.66614e-07
-0.80414	-1.35437e-06	-0.80414	-6.3385e-07	-0.80414	-4.54712e-07
-0.8017	-1.34735e-06	-0.8017	-6.28662e-07	-0.8017	-4.4574e-07
-0.79926	-1.3385e-06	-0.79926	-6.21643e-07	-0.79926	-4.35638e-07
-0.79681	-1.32965e-06	-0.79681	-6.16455e-07	-0.79681	-4.28619e-07
-0.79437	-1.32141e-06	-0.79437	-6.09436e-07	-0.79437	-4.18274e-07
-0.79193	-1.31287e-06	-0.79193	-6.03638e-07	-0.79193	-4.0918e-07
-0.78949	-1.30432e-06	-0.78949	-5.98145e-07	-0.78949	-4.00116e-07
-0.78705	-1.29669e-06	-0.78705	-5.92041e-07	-0.78705	-3.91724e-07
-0.78461	-1.28815e-06	-0.78461	-5.86243e-07	-0.78461	-3.83484e-07
-0.78217	-1.27991e-06	-0.78217	-5.81665e-07	-0.78217	-3.73962e-07
-0.77972	-1.27197e-06	-0.77972	-5.76477e-07	-0.77972	-3.64838e-07
-0.77728	-1.26251e-06	-0.77728	-5.70679e-07	-0.77728	-3.56873e-07
-0.77484	-1.25366e-06	-0.77484	-5.64575e-07	-0.77484	-3.48511e-07
-0.7724	-1.24573e-06	-0.7724	-5.57861e-07	-0.7724	-3.40424e-07
-0.76996	-1.2381e-06	-0.76996	-5.53284e-07	-0.76996	-3.3252e-07
-0.76752	-1.22986e-06	-0.76752	-5.47791e-07	-0.76752	-3.25348e-07
-0.76508	-1.2204e-06	-0.76508	-5.42297e-07	-0.76508	-3.15277e-07
-0.76263	-1.21185e-06	-0.76263	-5.39246e-07	-0.76263	-3.08777e-07
-0.76019	-1.20514e-06	-0.76019	-5.33142e-07	-0.76019	-3.00934e-07
-0.75775	-1.19751e-06	-0.75775	-5.3009e-07	-0.75775	-2.93854e-07
-0.75531	-1.18958e-06	-0.75531	-5.22461e-07	-0.75531	-2.88483e-07
-0.75287	-1.18317e-06	-0.75287	-5.19104e-07	-0.75287	-2.80457e-07
-0.75043	-1.17432e-06	-0.75043	-5.1178e-07	-0.75043	-2.72186e-07
-0.74799	-1.16669e-06	-0.74799	-5.09949e-07	-0.74799	-2.68219e-07
-0.74554	-1.15845e-06	-0.74554	-5.04761e-07	-0.74554	-2.6123e-07
-0.7431	-1.1499e-06	-0.7431	-5.00793e-07	-0.7431	-2.54791e-07
-0.74066	-1.14136e-06	-0.74066	-4.97131e-07	-0.74066	-2.48596e-07
-0.73822	-1.13312e-06	-0.73822	-4.91638e-07	-0.73822	-2.4234e-07
-0.73578	-1.12549e-06	-0.73578	-4.88892e-07	-0.73578	-2.37457e-07
-0.73334	-1.11786e-06	-0.73334	-4.83093e-07	-0.73334	-2.32178e-07
-0.7309	-1.10992e-06	-0.7309	-4.80042e-07	-0.7309	-2.26807e-07
-0.72845	-1.10199e-06	-0.72845	-4.76074e-07	-0.72845	-2.2168e-07
-0.72601	-1.09497e-06	-0.72601	-4.72595e-07	-0.72601	-2.16034e-07
-0.72357	-1.08765e-06	-0.72357	-4.68323e-07	-0.72357	-2.10419e-07
-0.72113	-1.08063e-06	-0.72113	-4.6402e-07	-0.72113	-2.06055e-07
-0.71869	-1.07361e-06	-0.71869	-4.62463e-07	-0.71869	-2.01599e-07
-0.71625	-1.06659e-06	-0.71625	-4.59625e-07	-0.71625	-1.96991e-07
-0.71381	-1.05652e-06	-0.71381	-4.55048e-07	-0.71381	-1.90918e-07
-0.71136	-1.0495e-06	-0.71136	-4.53064e-07	-0.71136	-1.85486e-07
-0.70892	-1.04126e-06	-0.70892	-4.50745e-07	-0.70892	-1.82556e-07
-0.70648	-1.03333e-06	-0.70648	-4.46228e-07	-0.70648	-1.77826e-07
-0.70404	-1.02509e-06	-0.70404	-4.43054e-07	-0.70404	-1.73615e-07
-0.7016	-1.01776e-06	-0.7016	-4.40155e-07	-0.7016	-1.67023e-07
-0.69916	-1.00922e-06	-0.69916	-4.35669e-07	-0.69916	-1.62201e-07
-0.69672	-1.00006e-06	-0.69672	-4.34113e-07	-0.69672	-1.60614e-07
-0.69427	-9.93652e-07	-0.69427	-4.3158e-07	-0.69427	-1.54114e-07
-0.69183	-9.85718e-07	-0.69183	-4.28741e-07	-0.69183	-1.5094e-07
-0.68939	-9.80225e-07	-0.68939	-4.26178e-07	-0.68939	-1.45935e-07
-0.68695	-9.72595e-07	-0.68695	-4.22485e-07	-0.68695	-1.41968e-07
-0.68451	-9.65271e-07	-0.68451	-4.21692e-07	-0.68451	-1.36902e-07
-0.68207	-9.58252e-07	-0.68207	-4.17603e-07	-0.68207	-1.34918e-07
-0.67963	-9.50317e-07	-0.67963	-4.15375e-07	-0.67963	-1.3089e-07
-0.67719	-9.44824e-07	-0.67719	-4.10858e-07	-0.67719	-1.26892e-07
-0.67474	-9.38721e-07	-0.67474	-4.08295e-07	-0.67474	-1.23932e-07
-0.6723	-9.2865e-07	-0.6723	-4.06281e-07	-0.6723	-1.21307e-07
-0.66986	-9.22546e-07	-0.66986	-4.03381e-07	-0.66986	-1.17737e-07
-0.66742	-9.15222e-07	-0.66742	-4.00452e-07	-0.66742	-1.15143e-07
-0.66498	-9.06372e-07	-0.66498	-3.97003e-07	-0.66498	-1.12457e-07
-0.66254	-8.99048e-07	-0.66254	-3.94104e-07	-0.66254	-1.0907e-07
-0.6601	-8.92944e-07	-0.6601	-3.90991e-07	-0.6601	-1.05835e-07
-0.65765	-8.86536e-07	-0.65765	-3.8797e-07	-0.65765	-1.01471e-07
-0.65521	-8.81653e-07	-0.65521	-3.84918e-07	-0.65521	-1.00525e-07
-0.65277	-8.74329e-07	-0.65277	-3.81622e-07	-0.65277	-9.63135e-08
-0.65033	-8.68225e-07	-0.65033	-3.78113e-07	-0.65033	-9.32617e-08
-0.64789	-8.60596e-07	-0.64789	-3.73566e-07	-0.64789	-8.89893e-08
-0.64545	-8.51746e-07	-0.64545	-3.71887e-07	-0.64545	-8.74023e-08
-0.64301	-8.45032e-07	-0.64301	-3.67981e-07	-0.64301	-8.44421e-08
-0.64056	-8.37097e-07	-0.64056	-3.65234e-07	-0.64056	-8.30383e-08
-0.63812	-8.30383e-07	-0.63812	-3.61145e-07	-0.63812	-7.91931e-08
-0.63568	-8.25195e-07	-0.63568	-3.58154e-07	-0.63568	-7.63855e-08
-0.63324	-8.17566e-07	-0.63324	-3.5498e-07	-0.63324	-7.34558e-08
-0.6308	-8.11157e-07	-0.6308	-3.52539e-07	-0.6308	-7.34253e-08
-0.62836	-8.02002e-07	-0.62836	-3.48785e-07	-0.62836	-6.90918e-08
-0.62592	-7.97424e-07	-0.62592	-3.45184e-07	-0.62592	-6.70471e-08
-0.62347	-7.9071e-07	-0.62347	-3.41644e-07	-0.62347	-6.49414e-08
-0.62103	-7.83691e-07	-0.62103	-3.37982e-07	-0.62103	-6.26831e-08
-0.61859	-7.76978e-07	-0.61859	-3.36334e-07	-0.61859	-5.85022e-08
-0.61615	-7.70264e-07	-0.61615	-3.32703e-07	-0.61615	-5.63049e-08
-0.61371	-7.6355e-07	-0.61371	-3.29102e-07	-0.61371	-5.3894e-08
-0.61127	-7.57446e-07	-0.61127	-3.25684e-07	-0.61127	-5.26123e-08
-0.60883	-7.49817e-07	-0.60883	-3.23486e-07	-0.60883	-4.98352e-08
-0.60638	-7.43103e-07	-0.60638	-3.19977e-07	-0.60638	-4.72717e-08
-0.60394	-7.36389e-07	-0.60394	-3.16467e-07	-0.60394	-4.44641e-08
-0.6015	-7.30896e-07	-0.6015	-3.14026e-07	-0.6015	-4.24194e-08
-0.59906	-7.22961e-07	-0.59906	-3.09998e-07	-0.59906	-4.21143e-08
-0.59662	-7.17773e-07	-0.59662	-3.06732e-07	-0.59662	-3.83301e-08
-0.59418	-7.09534e-07	-0.59418	-3.02917e-07	-0.59418	-3.6377e-08
-0.59174	-7.02515e-07	-0.59174	-3.00323e-07	-0.59174	-3.51257e-08
-0.58929	-6.9519e-07	-0.58929	-2.98004e-07	-0.58929	-3.32031e-08
-0.58685	-6.90918e-07	-0.58685	-2.93793e-07	-0.58685	-3.07007e-08
-0.58441	-6.82983e-07	-0.58441	-2.93427e-07	-0.58441	-2.85645e-08
-0.58197	-6.76575e-07	-0.58197	-2.89032e-07	-0.58197	-2.70386e-08
-0.57953	-6.69556e-07	-0.57953	-2.84698e-07	-0.57953	-2.52075e-08
-0.57709	-6.64673e-07	-0.57709	-2.81342e-07	-0.57709	-2.33765e-08
-0.57465	-6.57959e-07	-0.57465	-2.79083e-07	-0.57465	-2.28882e-08
-0.5722	-6.5094e-07	-0.5722	-2.75757e-07	-0.5722	-2.05688e-08
-0.56976	-6.43005e-07	-0.56976	-2.72736e-07	-0.56976	-1.70898e-08
-0.56732	-6.37207e-07	-0.56732	-2.69684e-07	-0.56732	-1.65405e-08
-0.56488	-6.30493e-07	-0.56488	-2.659e-07	-0.56488	-1.43433e-08
-0.56244	-6.23779e-07	-0.56244	-2.63794e-07	-0.56244	-1.20544e-08
-0.56	-6.17065e-07	-0.56	-2.6181e-07	-0.56	-1.24817e-08
-0.55756	-6.10962e-07	-0.55756	-2.58057e-07	-0.55756	-8.81958e-09
-0.55511	-6.02722e-07	-0.55511	-2.55707e-07	-0.55511	-7.65991e-09
-0.55267	-5.9845e-07	-0.55267	-2.5415e-07	-0.55267	-6.57349e-09
-0.55023	-5.896e-07	-0.55023	-2.51038e-07	-0.55023	-4.45557e-09
-0.54779	-5.84717e-07	-0.54779	-2.48505e-07	-0.54779	-3.90625e-09
-0.54535	-5.78003e-07	-0.54535	-2.45422e-07	-0.54535	-5.15747e-10
-0.54291	-5.71289e-07	-0.54291	-2.41486e-07	-0.54291	1.27258e-09
-0.54047	-5.63965e-07	-0.54047	-2.39319e-07	-0.54047	2.09961e-09
-0.53802	-5.56641e-07	-0.53802	-2.37335e-07	-0.53802	5.70679e-09
-0.53558	-5.51147e-07	-0.53558	-2.33978e-07	-0.53558	6.10352e-09
-0.53314	-5.42297e-07	-0.53314	-2.31598e-07	-0.53314	7.62939e-09
-0.5307	-5.36194e-07	-0.5307	-2.29614e-07	-0.5307	9.49097e-09
-0.52826	-5.30701e-07	-0.52826	-2.26288e-07	-0.52826	1.15051e-08
-0.52582	-5.24597e-07	-0.52582	-2.2406e-07	-0.52582	1.39618e-08
-0.52338	-5.17883e-07	-0.52338	-2.22015e-07	-0.52338	1.4801e-08
-0.52094	-5.10864e-07	-0.52094	-2.18201e-07	-0.52094	1.58997e-08
-0.51849	-5.05371e-07	-0.51849	-2.15088e-07	-0.51849	1.91956e-08
-0.51605	-4.98047e-07	-0.51605	-2.14813e-07	-0.51605	1.95618e-08
-0.51361	-4.91333e-07	-0.51361	-2.10693e-07	-0.51361	2.09961e-08
-0.51117	-4.86145e-07	-0.51117	-2.09686e-07	-0.51117	2.28271e-08
-0.50873	-4.77905e-07	-0.50873	-2.07367e-07	-0.50873	2.49939e-08
-0.50629	-4.73022e-07	-0.50629	-2.0517e-07	-0.50629	2.75269e-08
-0.50385	-4.66248e-07	-0.50385	-2.034e-07	-0.50385	2.89001e-08
-0.5014	-4.58252e-07	-0.5014	-2.00409e-07	-0.5014	3.09753e-08
-0.49896	-4.51263e-07	-0.49896	-1.9754e-07	-0.49896	3.32947e-08
-0.49652	-4.44092e-07	-0.49652	-1.95465e-07	-0.49652	3.51563e-08
-0.49408	-4.37836e-07	-0.49408	-1.93726e-07	-0.49408	3.56445e-08
-0.49164	-4.30786e-07	-0.49164	-1.92688e-07	-0.49164	3.93066e-08
-0.4892	-4.24347e-07	-0.4892	-1.89667e-07	-0.4892	3.95508e-08
-0.48676	-4.18854e-07	-0.48676	-1.87958e-07	-0.48676	4.2511e-08
-0.48431	-4.12811e-07	-0.48431	-1.84814e-07	-0.48431	4.26025e-08
-0.48187	-4.05365e-07	-0.48187	-1.83655e-07	-0.48187	4.53796e-08
-0.47943	-3.99017e-07	-0.47943	-1.7923e-07	-0.47943	4.61121e-08
-0.47699	-3.92151e-07	-0.47699	-1.77155e-07	-0.47699	4.7821e-08
-0.47455	-3.86505e-07	-0.47455	-1.74133e-07	-0.47455	4.96216e-08
-0.47211	-3.78906e-07	-0.47211	-1.71875e-07	-0.47211	5.24597e-08
-0.46967	-3.72437e-07	-0.46967	-1.68488e-07	-0.46967	5.27954e-08
-0.46722	-3.67432e-07	-0.46722	-1.65741e-07	-0.46722	5.58167e-08
-0.46478	-3.59253e-07	-0.46478	-1.63696e-07	-0.46478	5.72205e-08
-0.46234	-3.53149e-07	-0.46234	-1.60889e-07	-0.46234	5.84412e-08
-0.4599	-3.46222e-07	-0.4599	-1.57654e-07	-0.4599	5.98145e-08
-0.45746	-3.40302e-07	-0.45746	-1.55396e-07	-0.45746	6.26526e-08
-0.45502	-3.35663e-07	-0.45502	-1.52435e-07	-0.45502	6.38733e-08
-0.45258	-3.29132e-07	-0.45258	-1.50421e-07	-0.45258	6.59485e-08
-0.45013	-3.21686e-07	-0.45013	-1.45996e-07	-0.45013	6.67114e-08
-0.44769	-3.15399e-07	-0.44769	-1.44531e-07	-0.44769	6.91528e-08
-0.44525	-3.08838e-07	-0.44525	-1.41785e-07	-0.44525	6.99158e-08
-0.44281	-3.01697e-07	-0.44281	-1.38672e-07	-0.44281	7.26318e-08
-0.44037	-2.95654e-07	-0.44037	-1.36505e-07	-0.44037	7.32727e-08
-0.43793	-2.87842e-07	-0.43793	-1.33392e-07	-0.43793	7.56531e-08
-0.43549	-2.83295e-07	-0.43549	-1.31104e-07	-0.43549	7.69958e-08
-0.43304	-2.76306e-07	-0.43304	-1.28906e-07	-0.43304	7.87964e-08
-0.4306	-2.6947e-07	-0.4306	-1.25397e-07	-0.4306	7.88269e-08
-0.42816	-2.6355e-07	-0.42816	-1.2265e-07	-0.42816	8.17261e-08
-0.42572	-2.56836e-07	-0.42572	-1.18744e-07	-0.42572	8.37402e-08
-0.42328	-2.50122e-07	-0.42328	-1.17645e-07	-0.42328	8.46252e-08
-0.42084	-2.44385e-07	-0.42084	-1.14716e-07	-0.42084	8.63037e-08
-0.4184	-2.38708e-07	-0.4184	-1.13647e-07	-0.4184	8.89587e-08
-0.41595	-2.32391e-07	-0.41595	-1.10535e-07	-0.41595	8.92334e-08
-0.41351	-2.25861e-07	-0.41351	-1.06873e-07	-0.41351	9.13391e-08
-0.41107	-2.20642e-07	-0.41107	-1.03973e-07	-0.41107	9.32617e-08
-0.40863	-2.13654e-07	-0.40863	-1.0141e-07	-0.40863	9.43604e-08
-0.40619	-2.0871e-07	-0.40619	-9.94873e-08	-0.40619	9.66797e-08
-0.40375	-2.02423e-07	-0.40375	-9.63135e-08	-0.40375	9.63135e-08
-0.40131	-1.9873e-07	-0.40131	-9.31091e-08	-0.40131	9.85413e-08
-0.39886	-1.91315e-07	-0.39886	-9.12476e-08	-0.39886	9.9823e-08
-0.39642	-1.86554e-07	-0.39642	-8.74329e-08	-0.39642	1.01837e-07
-0.39398	-1.79932e-07	-0.39398	-8.57544e-08	-0.39398	1.03485e-07
-0.39154	-1.75507e-07	-0.39154	-8.28247e-08	-0.39154	1.06049e-07
-0.3891	-1.68762e-07	-0.3891	-8.06885e-08	-0.3891	1.06628e-07
-0.38666	-1.64032e-07	-0.38666	-7.79419e-08	-0.38666	1.0791e-07
-0.38422	-1.57959e-07	-0.38422	-7.50122e-08	-0.38422	1.1026e-07
-0.38177	-1.52405e-07	-0.38177	-7.4707e-08	-0.38177	1.12e-07
-0.37933	-1.47125e-07	-0.37933	-7.09839e-08	-0.37933	1.13647e-07
-0.37689	-1.42456e-07	-0.37689	-6.75659e-08	-0.37689	1.14319e-07
-0.37445	-1.36566e-07	-0.37445	-6.69861e-08	-0.37445	1.16486e-07
-0.37201	-1.32568e-07	-0.37201	-6.39038e-08	-0.37201	1.16486e-07
-0.36957	-1.24359e-07	-0.36957	-6.22253e-08	-0.36957	1.18774e-07
-0.36713	-1.21521e-07	-0.36713	-5.97534e-08	-0.36713	1.20544e-07
-0.36469	-1.15601e-07	-0.36469	-5.78918e-08	-0.36469	1.21613e-07
-0.36224	-1.11023e-07	-0.36224	-5.60608e-08	-0.36224	1.24115e-07
-0.3598	-1.06598e-07	-0.3598	-5.51147e-08	-0.3598	1.25519e-07
-0.35736	-1.0257e-07	-0.35736	-5.13611e-08	-0.35736	1.27167e-07
-0.35492	-9.73816e-08	-0.35492	-4.98047e-08	-0.35492	1.27899e-07
-0.35248	-9.15833e-08	-0.35248	-4.79431e-08	-0.35248	1.27991e-07
-0.35004	-8.79822e-08	-0.35004	-4.73328e-08	-0.35004	1.30096e-07
-0.3476	-8.39539e-08	-0.3476	-4.43115e-08	-0.3476	1.32446e-07
-0.34515	-7.8949e-08	-0.34515	-4.2511e-08	-0.34515	1.33698e-07
-0.34271	-7.4646e-08	-0.34271	-4.05884e-08	-0.34271	1.36383e-07
-0.34027	-7.04041e-08	-0.34027	-3.7384e-08	-0.34027	1.36292e-07
-0.33783	-6.66809e-08	-0.33783	-3.49121e-08	-0.33783	1.37817e-07
-0.33539	-6.28052e-08	-0.33539	-3.33252e-08	-0.33539	1.39282e-07
-0.33295	-5.82886e-08	-0.33295	-3.33252e-08	-0.33295	1.41296e-07
-0.33051	-5.3833e-08	-0.33051	-2.98157e-08	-0.33051	1.42029e-07
-0.32806	-4.97131e-08	-0.32806	-2.86255e-08	-0.32806	1.44257e-07
-0.32562	-4.44641e-08	-0.32562	-2.62146e-08	-0.32562	1.45142e-07
-0.32318	-4.23584e-08	-0.32318	-2.40479e-08	-0.32318	1.4679e-07
-0.32074	-3.79639e-08	-0.32074	-2.10571e-08	-0.32074	1.48346e-07
-0.3183	-3.3844e-08	-0.3183	-1.84631e-08	-0.3183	1.47919e-07
-0.31586	-3.03955e-08	-0.31586	-1.57166e-08	-0.31586	1.5213e-07
-0.31342	-2.63367e-08	-0.31342	-1.52161e-08	-0.31342	1.51581e-07
-0.31097	-2.2522e-08	-0.31097	-1.26038e-08	-0.31097	1.52344e-07
-0.30853	-1.95618e-08	-0.30853	-9.33533e-09	-0.30853	1.53778e-07
-0.30609	-1.57166e-08	-0.30609	-7.65991e-09	-0.30609	1.56067e-07
-0.30365	-1.23291e-08	-0.30365	-5.94482e-09	-0.30365	1.5744e-07
-0.30121	-8.57544e-09	-0.30121	-3.57056e-09	-0.30121	1.58783e-07
-0.29877	-6.46973e-09	-0.29877	-1.7395e-09	-0.29877	1.6098e-07
-0.29633	-2.31934e-09	-0.29633	1.52588e-10	-0.29633	1.61469e-07
-0.29388	1.52588e-10	-0.29388	2.15759e-09	-0.29388	1.63452e-07
-0.29144	3.63159e-09	-0.29144	4.73633e-09	-0.29144	1.64948e-07
-0.289	6.79932e-09	-0.289	6.97632e-09	-0.289	1.64703e-07
-0.28656	9.64355e-09	-0.28656	1.00006e-08	-0.28656	1.67847e-07
-0.28412	1.19629e-08	-0.28412	1.17188e-08	-0.28412	1.6806e-07
-0.28168	1.54114e-08	-0.28168	1.47095e-08	-0.28168	1.69037e-07
-0.27924	1.80969e-08	-0.27924	1.66626e-08	-0.27924	1.71082e-07
-0.27679	2.14844e-08	-0.27679	1.97449e-08	-0.27679	1.72241e-07
-0.27435	2.31018e-08	-0.27435	2.07214e-08	-0.27435	1.74225e-07
-0.27191	2.55127e-08	-0.27191	2.47192e-08	-0.27191	1.75537e-07
-0.26947	2.92053e-08	-0.26947	2.54822e-08	-0.26947	1.77155e-07
-0.26703	3.22876e-08	-0.26703	2.80762e-08	-0.26703	1.78009e-07
-0.26459	3.50647e-08	-0.26459	3.17383e-08	-0.26459	1.79688e-07
-0.26215	3.77808e-08	-0.26215	3.40881e-08	-0.26215	1.80603e-07
-0.2597	4.11377e-08	-0.2597	3.53699e-08	-0.2597	1.83105e-07
-0.25726	4.36096e-08	-0.25726	3.8147e-08	-0.25726	1.84448e-07
-0.25482	4.58984e-08	-0.25482	3.95508e-08	-0.25482	1.85547e-07
-0.25238	4.79431e-08	-0.25238	4.38538e-08	-0.25238	1.8576e-07
-0.24994	5.05981e-08	-0.24994	4.5929e-08	-0.24994	1.87042e-07
-0.2475	5.27954e-08	-0.2475	4.89807e-08	-0.2475	1.87775e-07
-0.24506	5.62439e-08	-0.24506	5.04761e-08	-0.24506	1.89514e-07
-0.24261	5.77393e-08	-0.24261	5.13611e-08	-0.24261	1.92291e-07
-0.24017	5.97229e-08	-0.24017	5.44434e-08	-0.24017	1.94061e-07
-0.23773	6.30493e-08	-0.23773	5.87463e-08	-0.23773	1.95313e-07
-0.23529	6.61011e-08	-0.23529	6.09741e-08	-0.23529	1.95709e-07
-0.23285	6.73828e-08	-0.23285	6.30188e-08	-0.23285	1.97052e-07
-0.23041	6.86646e-08	-0.23041	6.604e-08	-0.23041	1.96869e-07
-0.22797	7.10144e-08	-0.22797	6.75659e-08	-0.22797	1.99829e-07
-0.22552	7.23267e-08	-0.22552	6.97937e-08	-0.22552	2.02423e-07
-0.22308	7.5592e-08	-0.22308	7.22351e-08	-0.22308	2.02576e-07
-0.22064	7.69043e-08	-0.22064	7.58667e-08	-0.22064	2.03522e-07
-0.2182	7.91931e-08	-0.2182	7.72095e-08	-0.2182	2.04376e-07
-0.21576	8.09326e-08	-0.21576	7.8125e-08	-0.21576	2.07611e-07
-0.21332	8.38318e-08	-0.21332	8.11462e-08	-0.21332	2.09167e-07
-0.21088	8.41675e-08	-0.21088	8.25195e-08	-0.21088	2.10083e-07
-0.20844	8.69446e-08	-0.20844	8.64563e-08	-0.20844	2.10754e-07
-0.20599	8.90198e-08	-0.20599	8.78601e-08	-0.20599	2.12097e-07
-0.20355	9.09424e-08	-0.20355	9.12476e-08	-0.20355	2.13379e-07
-0.20111	9.26208e-08	-0.20111	9.40552e-08	-0.20111	2.14783e-07
-0.19867	9.41467e-08	-0.19867	9.57031e-08	-0.19867	2.14874e-07
-0.19623	9.52148e-08	-0.19623	9.75647e-08	-0.19623	2.17163e-07
-0.19379	9.69238e-08	-0.19379	1.00525e-07	-0.19379	2.17743e-07
-0.19135	9.82361e-08	-0.19135	1.01593e-07	-0.19135	2.20337e-07
-0.1889	1.00342e-07	-0.1889	1.04736e-07	-0.1889	2.21283e-07
-0.18646	1.02478e-07	-0.18646	1.0675e-07	-0.18646	2.2168e-07
-0.18402	1.03088e-07	-0.18402	1.1087e-07	-0.18402	2.23053e-07
-0.18158	1.04523e-07	-0.18158	1.12366e-07	-0.18158	2.24335e-07
-0.17914	1.05957e-07	-0.17914	1.14319e-07	-0.17914	2.26654e-07
-0.1767	1.06689e-07	-0.1767	1.17493e-07	-0.1767	2.26898e-07
-0.17426	1.08276e-07	-0.17426	1.19507e-07	-0.17426	2.28027e-07
-0.17181	1.08704e-07	-0.17181	1.23413e-07	-0.17181	2.29462e-07
-0.16937	1.10901e-07	-0.16937	1.24542e-07	-0.16937	2.3114e-07
-0.16693	1.1261e-07	-0.16693	1.26007e-07	-0.16693	2.32269e-07
-0.16449	1.14349e-07	-0.16449	1.3028e-07	-0.16449	2.33704e-07
-0.16205	1.1673e-07	-0.16205	1.32019e-07	-0.16205	2.35077e-07
-0.15961	1.18042e-07	-0.15961	1.36566e-07	-0.15961	2.36542e-07
-0.15717	1.19019e-07	-0.15717	1.37024e-07	-0.15717	2.37549e-07
-0.15472	1.20422e-07	-0.15472	1.38916e-07	-0.15472	2.38098e-07
-0.15228	1.20605e-07	-0.15228	1.40747e-07	-0.15228	2.40753e-07
-0.14984	1.23108e-07	-0.14984	1.44043e-07	-0.14984	2.41791e-07
-0.1474	1.23566e-07	-0.1474	1.47705e-07	-0.1474	2.42859e-07
-0.14496	1.2561e-07	-0.14496	1.49139e-07	-0.14496	2.44263e-07
-0.14252	1.27045e-07	-0.14252	1.53046e-07	-0.14252	2.44293e-07
-0.14008	1.27655e-07	-0.14008	1.54236e-07	-0.14008	2.47253e-07
-0.13763	1.28723e-07	-0.13763	1.55975e-07	-0.13763	2.48077e-07
-0.13519	1.30707e-07	-0.13519	1.59119e-07	-0.13519	2.48871e-07
-0.13275	1.31134e-07	-0.13275	1.61499e-07	-0.13275	2.50458e-07
-0.13031	1.32019e-07	-0.13031	1.63849e-07	-0.13031	2.51404e-07
-0.12787	1.34277e-07	-0.12787	1.66168e-07	-0.12787	2.53662e-07
-0.12543	1.35864e-07	-0.12543	1.69373e-07	-0.12543	2.54517e-07
-0.12299	1.36871e-07	-0.12299	1.71204e-07	-0.12299	2.55493e-07
-0.12054	1.37878e-07	-0.12054	1.72668e-07	-0.12054	2.57751e-07
-0.1181	1.38397e-07	-0.1181	1.7627e-07	-0.1181	2.57446e-07
-0.11566	1.4032e-07	-0.11566	1.78192e-07	-0.11566	2.58698e-07
-0.11322	1.42059e-07	-0.11322	1.80359e-07	-0.11322	2.61047e-07
-0.11078	1.43982e-07	-0.11078	1.82007e-07	-0.11078	2.60773e-07
-0.10834	1.43219e-07	-0.10834	1.86249e-07	-0.10834	2.63733e-07
-0.1059	1.45477e-07	-0.1059	1.88446e-07	-0.1059	2.63031e-07
-0.10345	1.46271e-07	-0.10345	1.91406e-07	-0.10345	2.65564e-07
-0.10101	1.48651e-07	-0.10101	1.93726e-07	-0.10101	2.65839e-07
-0.09857	1.47888e-07	-0.09857	1.97021e-07	-0.09857	2.68585e-07
-0.09613	1.4859e-07	-0.09613	1.99188e-07	-0.09613	2.70111e-07
-0.09369	1.49963e-07	-0.09369	2.02454e-07	-0.09369	2.70508e-07
-0.09125	1.50848e-07	-0.09125	2.03888e-07	-0.09125	2.72675e-07
-0.08881	1.52679e-07	-0.08881	2.05566e-07	-0.08881	2.73315e-07
-0.08636	1.54083e-07	-0.08636	2.10876e-07	-0.08636	2.75604e-07
-0.08392	1.54114e-07	-0.08392	2.13043e-07	-0.08392	2.74231e-07
-0.08148	1.54999e-07	-0.08148	2.15424e-07	-0.08148	2.76672e-07
-0.07904	1.56189e-07	-0.07904	2.16095e-07	-0.07904	2.77985e-07
-0.0766	1.57593e-07	-0.0766	2.19238e-07	-0.0766	2.79907e-07
-0.07416	1.59668e-07	-0.07416	2.21283e-07	-0.07416	2.8006e-07
-0.07172	1.60187e-07	-0.07172	2.2525e-07	-0.07172	2.81586e-07
-0.06927	1.6275e-07	-0.06927	2.27936e-07	-0.06927	2.82776e-07
-0.06683	1.62628e-07	-0.06683	2.30591e-07	-0.06683	2.84851e-07
-0.06439	1.61713e-07	-0.06439	2.3175e-07	-0.06439	2.86591e-07
-0.06195	1.63483e-07	-0.06195	2.35077e-07	-0.06195	2.87933e-07
-0.05951	1.64276e-07	-0.05951	2.37549e-07	-0.05951	2.88177e-07
-0.05707	1.65771e-07	-0.05707	2.39563e-07	-0.05707	2.89642e-07
-0.05463	1.65741e-07	-0.05463	2.43195e-07	-0.05463	2.90771e-07
-0.05219	1.66443e-07	-0.05219	2.45392e-07	-0.05219	2.91779e-07
-0.04974	1.69006e-07	-0.04974	2.47742e-07	-0.04974	2.93121e-07
-0.0473	1.71417e-07	-0.0473	2.50977e-07	-0.0473	2.95746e-07
-0.04486	1.70319e-07	-0.04486	2.5354e-07	-0.04486	2.95135e-07
-0.04242	1.70746e-07	-0.04242	2.56439e-07	-0.04242	2.97241e-07
-0.03998	1.70563e-07	-0.03998	2.58728e-07	-0.03998	2.97943e-07
-0.03754	1.70837e-07	-0.03754	2.62665e-07	-0.03754	2.99561e-07
-0.0351	1.72089e-07	-0.0351	2.64343e-07	-0.0351	3.00629e-07
-0.03265	1.74164e-07	-0.03265	2.65015e-07	-0.03265	3.01788e-07
-0.03021	1.7514e-07	-0.03021	2.69806e-07	-0.03021	3.03772e-07
-0.02777	1.76239e-07	-0.02777	2.70752e-07	-0.02777	3.0423e-07
-0.02533	1.75354e-07	-0.02533	2.72949e-07	-0.02533	3.04901e-07
-0.02289	1.78558e-07	-0.02289	2.78137e-07	-0.02289	3.06183e-07
-0.02045	1.7923e-07	-0.02045	2.80273e-07	-0.02045	3.07709e-07
-0.01801	1.80328e-07	-0.01801	2.81586e-07	-0.01801	3.09967e-07
-0.01556	1.81732e-07	-0.01556	2.85156e-07	-0.01556	3.11035e-07
-0.01312	1.82709e-07	-0.01312	2.86987e-07	-0.01312	3.10211e-07
-0.01068	1.84296e-07	-0.01068	2.89001e-07	-0.01068	3.14728e-07
-0.00824	1.85333e-07	-0.00824	2.93732e-07	-0.00824	3.14575e-07
-0.0058	1.85852e-07	-0.0058	2.94342e-07	-0.0058	3.14941e-07
-0.00336	1.88751e-07	-0.00336	2.96265e-07	-0.00336	3.172e-07
-0.000915527	1.90063e-07	-0.000915527	2.99561e-07	-0.000915527	3.17566e-07
0.00153	1.93176e-07	0.00153	3.02826e-07	0.00153	3.20038e-07
0.00397	1.93085e-07	0.00397	3.05267e-07	0.00397	3.20129e-07
0.00641	1.96472e-07	0.00641	3.07068e-07	0.00641	3.21014e-07
0.00885	1.97418e-07	0.00885	3.09326e-07	0.00885	3.23181e-07
0.01129	1.98364e-07	0.01129	3.12775e-07	0.01129	3.2486e-07
0.01373	1.99402e-07	0.01373	3.16498e-07	0.01373	3.24493e-07
0.01617	2.00531e-07	0.01617	3.16742e-07	0.01617	3.27728e-07
0.01862	2.00836e-07	0.01862	3.21106e-07	0.01862	3.28064e-07
0.02106	2.02728e-07	0.02106	3.22144e-07	0.02106	3.29346e-07
0.0235	2.03918e-07	0.0235	3.24524e-07	0.0235	3.30292e-07
0.02594	2.0462e-07	0.02594	3.28735e-07	0.02594	3.31482e-07
0.02838	2.05719e-07	0.02838	3.31207e-07	0.02838	3.31879e-07
0.03082	2.07123e-07	0.03082	3.33435e-07	0.03082	3.33984e-07
0.03326	2.08466e-07	0.03326	3.34961e-07	0.03326	3.35327e-07
0.03571	2.10022e-07	0.03571	3.39691e-07	0.03571	3.37219e-07
0.03815	2.10419e-07	0.03815	3.4137e-07	0.03815	3.37921e-07
0.04059	2.12006e-07	0.04059	3.42834e-07	0.04059	3.38318e-07
0.04303	2.13776e-07	0.04303	3.45947e-07	0.04303	3.40515e-07
0.04547	2.15668e-07	0.04547	3.4845e-07	0.04547	3.41492e-07
0.04791	2.18689e-07	0.04791	3.50891e-07	0.04791	3.42316e-07
0.05035	2.2168e-07	0.05035	3.53333e-07	0.05035	3.44452e-07
0.0528	2.23083e-07	0.0528	3.55377e-07	0.0528	3.45673e-07
0.05524	2.23541e-07	0.05524	3.59222e-07	0.05524	3.45428e-07
0.05768	2.24487e-07	0.05768	3.6084e-07	0.05768	3.47229e-07
0.06012	2.25159e-07	0.06012	3.63556e-07	0.06012	3.4848e-07
0.06256	2.26685e-07	0.06256	3.66913e-07	0.06256	3.49945e-07
0.065	2.2995e-07	0.065	3.69415e-07	0.065	3.51349e-07
0.06744	2.31689e-07	0.06744	3.73962e-07	0.06744	3.52448e-07
0.06989	2.32239e-07	0.06989	3.75e-07	0.06989	3.54401e-07
0.07233	2.35199e-07	0.07233	3.77197e-07	0.07233	3.54614e-07
0.07477	2.39166e-07	0.07477	3.8028e-07	0.07477	3.5614e-07
0.07721	2.40753e-07	0.07721	3.82233e-07	0.07721	3.57971e-07
0.07965	2.41272e-07	0.07965	3.85529e-07	0.07965	3.59222e-07
0.08209	2.435e-07	0.08209	3.87756e-07	0.08209	3.60291e-07
0.08453	2.44598e-07	0.08453	3.8974e-07	0.08453	3.61603e-07
0.08698	2.44751e-07	0.08698	3.92731e-07	0.08698	3.63678e-07
0.08942	2.45728e-07	0.08942	3.96301e-07	0.08942	3.63647e-07
0.09186	2.46399e-07	0.09186	4.00269e-07	0.09186	3.64441e-07
0.0943	2.47375e-07	0.0943	4.0213e-07	0.0943	3.66699e-07
0.09674	2.48169e-07	0.09674	4.04724e-07	0.09674	3.69476e-07
0.09918	2.50092e-07	0.09918	4.07379e-07	0.09918	3.68256e-07
0.10162	2.50824e-07	0.10162	4.10431e-07	0.10162	3.70209e-07
0.10406	2.51587e-07	0.10406	4.12781e-07	0.10406	3.72681e-07
0.10651	2.54669e-07	0.10651	4.16412e-07	0.10651	3.7381e-07
0.10895	2.57935e-07	0.10895	4.18884e-07	0.10895	3.75397e-07
0.11139	2.61108e-07	0.11139	4.21478e-07	0.11139	3.76862e-07
0.11383	2.63428e-07	0.11383	4.25262e-07	0.11383	3.78235e-07
0.11627	2.63123e-07	0.11627	4.27246e-07	0.11627	3.77899e-07
0.11871	2.65045e-07	0.11871	4.30603e-07	0.11871	3.80554e-07
0.12115	2.67029e-07	0.12115	4.33411e-07	0.12115	3.81165e-07
0.1236	2.69958e-07	0.1236	4.36554e-07	0.1236	3.82294e-07
0.12604	2.70538e-07	0.12604	4.39209e-07	0.12604	3.83667e-07
0.12848	2.72339e-07	0.12848	4.43756e-07	0.12848	3.85864e-07
0.13092	2.74536e-07	0.13092	4.45251e-07	0.13092	3.87604e-07
0.13336	2.76611e-07	0.13336	4.49249e-07	0.13336	3.88702e-07
0.1358	2.79205e-07	0.1358	4.50897e-07	0.1358	3.89343e-07
0.13824	2.81921e-07	0.13824	4.552e-07	0.13824	3.90259e-07
0.14069	2.85614e-07	0.14069	4.57977e-07	0.14069	3.91144e-07
0.14313	2.88727e-07	0.14313	4.60754e-07	0.14313	3.93372e-07
0.14557	2.9184e-07	0.14557	4.6402e-07	0.14557	3.94775e-07
0.14801	2.96722e-07	0.14801	4.68811e-07	0.14801	3.96454e-07
0.15045	2.97607e-07	0.15045	4.70154e-07	0.15045	3.9798e-07
0.15289	3.01697e-07	0.15289	4.75006e-07	0.15289	3.99078e-07
0.15533	3.03345e-07	0.15533	4.77203e-07	0.15533	3.99811e-07
0.15778	3.05176e-07	0.15778	4.80499e-07	0.15778	4.01398e-07
0.16022	3.08136e-07	0.16022	4.84009e-07	0.16022	4.04175e-07
0.16266	3.1189e-07	0.16266	4.87e-07	0.16266	4.04663e-07
0.1651	3.15521e-07	0.1651	4.90021e-07	0.1651	4.06219e-07
0.16754	3.18359e-07	0.16754	4.93591e-07	0.16754	4.06799e-07
0.16998	3.20587e-07	0.16998	4.97009e-07	0.16998	4.08569e-07
0.17242	3.24097e-07	0.17242	5.00854e-07	0.17242	4.09454e-07
0.17487	3.2785e-07	0.17487	5.05493e-07	0.17487	4.11926e-07
0.17731	3.31482e-07	0.17731	5.09247e-07	0.17731	4.13147e-07
0.17975	3.34015e-07	0.17975	5.11932e-07	0.17975	4.1449e-07
0.18219	3.37616e-07	0.18219	5.15564e-07	0.18219	4.15466e-07
0.18463	3.40576e-07	0.18463	5.20355e-07	0.18463	4.1687e-07
0.18707	3.42621e-07	0.18707	5.23804e-07	0.18707	4.18762e-07
0.18951	3.46771e-07	0.18951	5.26611e-07	0.18951	4.19586e-07
0.19196	3.49792e-07	0.19196	5.2948e-07	0.19196	4.22455e-07
0.1944	3.5202e-07	0.1944	5.34332e-07	0.1944	4.22882e-07
0.19684	3.55438e-07	0.19684	5.38727e-07	0.19684	4.25507e-07
0.19928	3.58856e-07	0.19928	5.4184e-07	0.19928	4.27612e-07
0.20172	3.6145e-07	0.20172	5.44464e-07	0.20172	4.2868e-07
0.20416	3.65875e-07	0.20416	5.49683e-07	0.20416	4.29291e-07
0.2066	3.70911e-07	0.2066	5.51971e-07	0.2066	4.31274e-07
0.20905	3.74664e-07	0.20905	5.56671e-07	0.20905	4.33014e-07
0.21149	3.79517e-07	0.21149	5.60425e-07	0.21149	4.34143e-07
0.21393	3.83606e-07	0.21393	5.65796e-07	0.21393	4.36157e-07
0.21637	3.88824e-07	0.21637	5.68359e-07	0.21637	4.38568e-07
0.21881	3.92456e-07	0.21881	5.71869e-07	0.21881	4.38873e-07
0.22125	3.96454e-07	0.22125	5.77393e-07	0.22125	4.4101e-07
0.22369	4.0152e-07	0.22369	5.81665e-07	0.22369	4.42932e-07
0.22614	4.05945e-07	0.22614	5.8548e-07	0.22614	4.45129e-07
0.22858	4.08539e-07	0.22858	5.88928e-07	0.22858	4.45221e-07
0.23102	4.10919e-07	0.23102	5.93201e-07	0.23102	4.48517e-07
0.23346	4.15161e-07	0.23346	5.97198e-07	0.23346	4.50256e-07
0.2359	4.19556e-07	0.2359	6.02051e-07	0.2359	4.51111e-07
0.23834	4.20837e-07	0.23834	6.03943e-07	0.23834	4.54407e-07
0.24078	4.25842e-07	0.24078	6.09436e-07	0.24078	4.56238e-07
0.24323	4.28131e-07	0.24323	6.13403e-07	0.24323	4.56635e-07
0.24567	4.33594e-07	0.24567	6.1676e-07	0.24567	4.57977e-07
0.24811	4.37592e-07	0.24811	6.21033e-07	0.24811	4.60266e-07
0.25055	4.43298e-07	0.25055	6.25916e-07	0.25055	4.6228e-07
0.25299	4.48334e-07	0.25299	6.30798e-07	0.25299	4.63745e-07
0.25543	4.53156e-07	0.25543	6.36292e-07	0.25543	4.65729e-07
0.25787	4.58801e-07	0.25787	6.40564e-07	0.25787	4.68048e-07
0.26031	4.63409e-07	0.26031	6.43921e-07	0.26031	4.70306e-07
0.26276	4.6759e-07	0.26276	6.47888e-07	0.26276	4.72748e-07
0.2652	4.73541e-07	0.2652	6.53381e-07	0.2652	4.74121e-07
0.26764	4.7818e-07	0.26764	6.57654e-07	0.26764	4.7583e-07
0.27008	4.82635e-07	0.27008	6.62842e-07	0.27008	4.77722e-07
0.27252	4.87762e-07	0.27252	6.67419e-07	0.27252	4.80225e-07
0.27496	4.93713e-07	0.27496	6.71692e-07	0.27496	4.82788e-07
0.2774	4.98108e-07	0.2774	6.7627e-07	0.2774	4.84528e-07
0.27985	5.04486e-07	0.27985	6.81152e-07	0.27985	4.86328e-07
0.28229	5.10651e-07	0.28229	6.86646e-07	0.28229	4.88464e-07
0.28473	5.17303e-07	0.28473	6.90918e-07	0.28473	4.91119e-07
0.28717	5.23621e-07	0.28717	6.96411e-07	0.28717	4.92706e-07
0.28961	5.30701e-07	0.28961	6.98242e-07	0.28961	4.94873e-07
0.29205	5.35278e-07	0.29205	7.04956e-07	0.29205	4.9585e-07
0.29449	5.42847e-07	0.29449	7.10144e-07	0.29449	4.99603e-07
0.29694	5.49561e-07	0.29694	7.13501e-07	0.29694	5.01892e-07
0.29938	5.56793e-07	0.29938	7.20215e-07	0.29938	5.02899e-07
0.30182	5.63721e-07	0.30182	7.23877e-07	0.30182	5.06775e-07
0.30426	5.69946e-07	0.30426	7.30591e-07	0.30426	5.07477e-07
0.3067	5.77362e-07	0.3067	7.33643e-07	0.3067	5.11261e-07
0.30914	5.82947e-07	0.30914	7.38525e-07	0.30914	5.13306e-07
0.31158	5.88745e-07	0.31158	7.44324e-07	0.31158	5.1416e-07
0.31403	5.97076e-07	0.31403	7.47986e-07	0.31403	5.16876e-07
0.31647	6.02112e-07	0.31647	7.53479e-07	0.31647	5.20721e-07
0.31891	6.08521e-07	0.31891	7.58362e-07	0.31891	5.22583e-07
0.32135	6.1554e-07	0.32135	7.62024e-07	0.32135	5.242e-07
0.32379	6.22864e-07	0.32379	7.68127e-07	0.32379	5.27252e-07
0.32623	6.31104e-07	0.32623	7.71484e-07	0.32623	5.28748e-07
0.32867	6.38428e-07	0.32867	7.77588e-07	0.32867	5.31799e-07
0.33112	6.46057e-07	0.33112	7.82471e-07	0.33112	5.34363e-07
0.33356	6.55212e-07	0.33356	7.86438e-07	0.33356	5.36133e-07
0.336	6.61621e-07	0.336	7.91626e-07	0.336	5.37903e-07
0.33844	6.68945e-07	0.33844	7.96814e-07	0.33844	5.41168e-07
0.34088	6.7627e-07	0.34088	8.01392e-07	0.34088	5.43701e-07
0.34332	6.82068e-07	0.34332	8.05969e-07	0.34332	5.46753e-07
0.34576	6.88171e-07	0.34576	8.10547e-07	0.34576	5.48553e-07
0.34821	6.96411e-07	0.34821	8.15125e-07	0.34821	5.51971e-07
0.35065	7.04041e-07	0.35065	8.18176e-07	0.35065	5.53711e-07
0.35309	7.10144e-07	0.35309	8.22754e-07	0.35309	5.56213e-07
0.35553	7.18689e-07	0.35553	8.27332e-07	0.35553	5.59479e-07
0.35797	7.25098e-07	0.35797	8.31604e-07	0.35797	5.62347e-07
0.36041	7.33948e-07	0.36041	8.38013e-07	0.36041	5.64911e-07
0.36285	7.41577e-07	0.36285	8.41675e-07	0.36285	5.65033e-07
0.3653	7.50427e-07	0.3653	8.45337e-07	0.3653	5.70557e-07
0.36774	7.59277e-07	0.36774	8.51135e-07	0.36774	5.71808e-07
0.37018	7.68738e-07	0.37018	8.54492e-07	0.37018	5.74066e-07
0.37262	7.77588e-07	0.37262	8.58459e-07	0.37262	5.76843e-07
0.37506	7.85828e-07	0.37506	8.62427e-07	0.37506	5.79376e-07
0.3775	7.96204e-07	0.3775	8.6731e-07	0.3775	5.82977e-07
0.37994	8.05359e-07	0.37994	8.71887e-07	0.37994	5.86121e-07
0.38239	8.14819e-07	0.38239	8.75244e-07	0.38239	5.90118e-07
0.38483	8.23059e-07	0.38483	8.79211e-07	0.38483	5.91827e-07
0.38727	8.31299e-07	0.38727	8.83789e-07	0.38727	5.94666e-07
0.38971	8.38318e-07	0.38971	8.87756e-07	0.38971	5.98419e-07
0.39215	8.46558e-07	0.39215	8.90808e-07	0.39215	6.00311e-07
0.39459	8.55103e-07	0.39459	8.94775e-07	0.39459	6.03027e-07
0.39703	8.62427e-07	0.39703	8.99963e-07	0.39703	6.05774e-07
0.39948	8.69141e-07	0.39948	9.03625e-07	0.39948	6.09436e-07
0.40192	8.77075e-07	0.40192	9.07898e-07	0.40192	6.11877e-07
0.40436	8.84094e-07	0.40436	9.11255e-07	0.40436	6.14319e-07
0.4068	8.92639e-07	0.4068	9.15222e-07	0.4068	6.17065e-07
0.40924	9.01794e-07	0.40924	9.18274e-07	0.40924	6.20117e-07
0.41168	9.10645e-07	0.41168	9.23462e-07	0.41168	6.24084e-07
0.41412	9.19189e-07	0.41412	9.25598e-07	0.41412	6.26831e-07
0.41656	9.30176e-07	0.41656	9.31396e-07	0.41656	6.29578e-07
0.41901	9.40552e-07	0.41901	9.32312e-07	0.41901	6.32935e-07
0.42145	9.50623e-07	0.42145	9.375e-07	0.42145	6.35376e-07
0.42389	9.60693e-07	0.42389	9.42078e-07	0.42389	6.39648e-07
0.42633	9.7168e-07	0.42633	9.45435e-07	0.42633	6.43921e-07
0.42877	9.79004e-07	0.42877	9.47876e-07	0.42877	6.46973e-07
0.43121	9.8938e-07	0.43121	9.52759e-07	0.43121	6.5033e-07
0.43365	9.96704e-07	0.43365	9.552e-07	0.43365	6.53687e-07
0.4361	1.00769e-06	0.4361	9.58557e-07	0.4361	6.57959e-07
0.43854	1.01501e-06	0.43854	9.63745e-07	0.43854	6.58569e-07
0.44098	1.02631e-06	0.44098	9.66492e-07	0.44098	6.64063e-07
0.44342	1.03333e-06	0.44342	9.70459e-07	0.44342	6.65283e-07
0.44586	1.04401e-06	0.44586	9.73511e-07	0.44586	6.69861e-07
0.4483	1.05286e-06	0.4483	9.77478e-07	0.4483	6.72913e-07
0.45074	1.0614e-06	0.45074	9.8053e-07	0.45074	6.78101e-07
0.45319	1.07117e-06	0.45319	9.83276e-07	0.45319	6.79321e-07
0.45563	1.08093e-06	0.45563	9.88464e-07	0.45563	6.83289e-07
0.45807	1.09009e-06	0.45807	9.90906e-07	0.45807	6.87256e-07
0.46051	1.10016e-06	0.46051	9.95178e-07	0.46051	6.92749e-07
0.46295	1.1087e-06	0.46295	9.9823e-07	0.46295	6.95496e-07
0.46539	1.11938e-06	0.46539	1.00159e-06	0.46539	6.99463e-07
0.46783	1.12793e-06	0.46783	1.00555e-06	0.46783	7.02515e-07
0.47028	1.13953e-06	0.47028	1.00891e-06	0.47028	7.06482e-07
0.47272	1.14807e-06	0.47272	1.01166e-06	0.47272	7.09534e-07
0.47516	1.15814e-06	0.47516	1.01288e-06	0.47516	7.14111e-07
0.4776	1.16821e-06	0.4776	1.01807e-06	0.4776	7.17163e-07
0.48004	1.1795e-06	0.48004	1.02173e-06	0.48004	7.22961e-07
0.48248	1.18988e-06	0.48248	1.02325e-06	0.48248	7.23877e-07
0.48492	1.20087e-06	0.48492	1.02936e-06	0.48492	7.2876e-07
0.48737	1.20941e-06	0.48737	1.03271e-06	0.48737	7.33948e-07
0.48981	1.22101e-06	0.48981	1.03455e-06	0.48981	7.37e-07
0.49225	1.2323e-06	0.49225	1.03882e-06	0.49225	7.40662e-07
0.49469	1.24359e-06	0.49469	1.04126e-06	0.49469	7.4707e-07
0.49713	1.25427e-06	0.49713	1.04553e-06	0.49713	7.48901e-07
0.49957	1.26465e-06	0.49957	1.0495e-06	0.49957	7.547e-07
0.50201	1.27289e-06	0.50201	1.05225e-06	0.50201	7.58362e-07
0.50446	1.28632e-06	0.50446	1.05621e-06	0.50446	7.6355e-07
0.5069	1.29761e-06	0.5069	1.05957e-06	0.5069	7.67212e-07
0.50934	1.30768e-06	0.50934	1.06415e-06	0.50934	7.724e-07
0.51178	1.31927e-06	0.51178	1.06628e-06	0.51178	7.77588e-07
0.51422	1.32935e-06	0.51422	1.06934e-06	0.51422	7.81555e-07
0.51666	1.34216e-06	0.51666	1.07422e-06	0.51666	7.86743e-07
0.5191	1.35498e-06	0.5191	1.07819e-06	0.5191	7.901e-07
0.52155	1.36627e-06	0.52155	1.08093e-06	0.52155	7.95593e-07
0.52399	1.37909e-06	0.52399	1.08551e-06	0.52399	8.00476e-07
0.52643	1.39313e-06	0.52643	1.08917e-06	0.52643	8.05664e-07
0.52887	1.40594e-06	0.52887	1.09283e-06	0.52887	8.10242e-07
0.53131	1.41663e-06	0.53131	1.0965e-06	0.53131	8.14514e-07
0.53375	1.42944e-06	0.53375	1.09924e-06	0.53375	8.20313e-07
0.53619	1.44379e-06	0.53619	1.10321e-06	0.53619	8.25806e-07
0.53864	1.45813e-06	0.53864	1.10809e-06	0.53864	8.30383e-07
0.54108	1.47186e-06	0.54108	1.11053e-06	0.54108	8.35876e-07
0.54352	1.48254e-06	0.54352	1.11481e-06	0.54352	8.41064e-07
0.54596	1.49353e-06	0.54596	1.11938e-06	0.54596	8.46252e-07
0.5484	1.50391e-06	0.5484	1.12305e-06	0.5484	8.52661e-07
0.55084	1.5152e-06	0.55084	1.12701e-06	0.55084	8.58154e-07
0.55328	1.52954e-06	0.55328	1.13068e-06	0.55328	8.63647e-07
0.55573	1.54266e-06	0.55573	1.13525e-06	0.55573	8.6853e-07
0.55817	1.55518e-06	0.55817	1.13922e-06	0.55817	8.74329e-07
0.56061	1.56799e-06	0.56061	1.14227e-06	0.56061	8.79822e-07
0.56305	1.58173e-06	0.56305	1.14655e-06	0.56305	8.8562e-07
0.56549	1.59576e-06	0.56549	1.15112e-06	0.56549	8.91724e-07
0.56793	1.61072e-06	0.56793	1.15601e-06	0.56793	8.98743e-07
0.57037	1.62506e-06	0.57037	1.15936e-06	0.57037	9.021e-07
0.57281	1.63757e-06	0.57281	1.16394e-06	0.57281	9.10339e-07
0.57526	1.651e-06	0.57526	1.16852e-06	0.57526	9.16138e-07
0.5777	1.66534e-06	0.5777	1.17218e-06	0.5777	9.23462e-07
0.58014	1.67847e-06	0.58014	1.17645e-06	0.58014	9.2804e-07
0.58258	1.69312e-06	0.58258	1.18103e-06	0.58258	9.35059e-07
0.58502	1.70471e-06	0.58502	1.18408e-06	0.58502	9.40857e-07
0.58746	1.71936e-06	0.58746	1.18866e-06	0.58746	9.47266e-07
0.5899	1.73157e-06	0.5899	1.19202e-06	0.5899	9.552e-07
0.59235	1.74591e-06	0.59235	1.19843e-06	0.59235	9.59473e-07
0.59479	1.75812e-06	0.59479	1.20178e-06	0.59479	9.67712e-07
0.59723	1.77216e-06	0.59723	1.20544e-06	0.59723	9.75342e-07
0.59967	1.7865e-06	0.59967	1.21124e-06	0.59967	9.8175e-07
0.60211	1.80145e-06	0.60211	1.21674e-06	0.60211	9.89075e-07
0.60455	1.81549e-06	0.60455	1.2207e-06	0.60455	9.94873e-07
0.60699	1.83044e-06	0.60699	1.2262e-06	0.60699	1.00281e-06
0.60944	1.84387e-06	0.60944	1.22925e-06	0.60944	1.00922e-06
0.61188	1.85913e-06	0.61188	1.23352e-06	0.61188	1.01807e-06
0.61432	1.87378e-06	0.61432	1.23901e-06	0.61432	1.02478e-06
0.61676	1.88965e-06	0.61676	1.24329e-06	0.61676	1.03271e-06
0.6192	1.90247e-06	0.6192	1.24817e-06	0.6192	1.04034e-06
0.62164	1.92017e-06	0.62164	1.25092e-06	0.62164	1.04736e-06
0.62408	1.93268e-06	0.62408	1.25671e-06	0.62408	1.0553e-06
0.62653	1.94855e-06	0.62653	1.2616e-06	0.62653	1.06323e-06
0.62897	1.96442e-06	0.62897	1.26678e-06	0.62897	1.07086e-06
0.63141	1.97876e-06	0.63141	1.27106e-06	0.63141	1.07849e-06
0.63385	1.99524e-06	0.63385	1.27563e-06	0.63385	1.08582e-06
0.63629	2.00989e-06	0.63629	1.28235e-06	0.63629	1.09528e-06
0.63873	2.02576e-06	0.63873	1.28632e-06	0.63873	1.10291e-06
0.64117	2.03918e-06	0.64117	1.29242e-06	0.64117	1.11115e-06
0.64362	2.05475e-06	0.64362	1.297e-06	0.64362	1.11908e-06
0.64606	2.0694e-06	0.64606	1.30341e-06	0.64606	1.12762e-06
0.6485	2.08496e-06	0.6485	1.30981e-06	0.6485	1.13495e-06
0.65094	2.10083e-06	0.65094	1.31409e-06	0.65094	1.14655e-06
0.65338	2.11456e-06	0.65338	1.31958e-06	0.65338	1.15509e-06
0.65582	2.13074e-06	0.65582	1.32629e-06	0.65582	1.16241e-06
0.65826	2.14783e-06	0.65826	1.33087e-06	0.65826	1.17279e-06
0.66071	2.16431e-06	0.66071	1.33667e-06	0.66071	1.18103e-06
0.66315	2.18109e-06	0.66315	1.34155e-06	0.66315	1.18744e-06
0.66559	2.19604e-06	0.66559	1.34857e-06	0.66559	1.19904e-06
0.66803	2.21069e-06	0.66803	1.35345e-06	0.66803	1.20605e-06
0.67047	2.22565e-06	0.67047	1.36078e-06	0.67047	1.21765e-06
0.67291	2.24182e-06	0.67291	1.3681e-06	0.67291	1.22742e-06
0.67535	2.25861e-06	0.67535	1.37451e-06	0.67535	1.23779e-06
0.6778	2.27356e-06	0.6778	1.37878e-06	0.6778	1.24695e-06
0.68024	2.29218e-06	0.68024	1.38428e-06	0.68024	1.25641e-06
0.68268	2.30804e-06	0.68268	1.39038e-06	0.68268	1.26495e-06
0.68512	2.32391e-06	0.68512	1.39771e-06	0.68512	1.27686e-06
0.68756	2.33887e-06	0.68756	1.40411e-06	0.68756	1.28754e-06
0.69	2.35382e-06	0.69	1.41144e-06	0.69	1.29822e-06
0.69244	2.36786e-06	0.69244	1.41785e-06	0.69244	1.30798e-06
0.69489	2.38434e-06	0.69489	1.42517e-06	0.69489	1.31897e-06
0.69733	2.40082e-06	0.69733	1.43219e-06	0.69733	1.32782e-06
0.69977	2.41669e-06	0.69977	1.43982e-06	0.69977	1.33942e-06
0.70221	2.43195e-06	0.70221	1.44531e-06	0.70221	1.3501e-06
0.70465	2.45087e-06	0.70465	1.45416e-06	0.70465	1.36108e-06
0.70709	2.46613e-06	0.70709	1.45996e-06	0.70709	1.37421e-06
0.70953	2.48291e-06	0.70953	1.46912e-06	0.70953	1.38275e-06
0.71198	2.49756e-06	0.71198	1.47736e-06	0.71198	1.39435e-06
0.71442	2.51373e-06	0.71442	1.48438e-06	0.71442	1.40564e-06
0.71686	2.5296e-06	0.71686	1.49231e-06	0.71686	1.41754e-06
0.7193	2.54608e-06	0.7193	1.50116e-06	0.7193	1.42822e-06
0.72174	2.56195e-06	0.72174	1.5094e-06	0.72174	1.44287e-06
0.72418	2.57874e-06	0.72418	1.51703e-06	0.72418	1.45294e-06
0.72662	2.59491e-06	0.72662	1.52649e-06	0.72662	1.46423e-06
0.72906	2.612e-06	0.72906	1.53473e-06	0.72906	1.47522e-06
0.73151	2.62665e-06	0.73151	1.54449e-06	0.73151	1.49048e-06
0.73395	2.64343e-06	0.73395	1.55212e-06	0.73395	1.50085e-06
0.73639	2.65686e-06	0.73639	1.56219e-06	0.73639	1.51276e-06
0.73883	2.67395e-06	0.73883	1.57166e-06	0.73883	1.5274e-06
0.74127	2.68799e-06	0.74127	1.5799e-06	0.74127	1.53961e-06
0.74371	2.70294e-06	0.74371	1.58813e-06	0.74371	1.55151e-06
0.74615	2.71729e-06	0.74615	1.59973e-06	0.74615	1.56647e-06
0.7486	2.73224e-06	0.7486	1.60767e-06	0.7486	1.5799e-06
0.75104	2.74628e-06	0.75104	1.61743e-06	0.75104	1.59363e-06
0.75348	2.76367e-06	0.75348	1.62872e-06	0.75348	1.60797e-06
0.75592	2.78015e-06	0.75592	1.63757e-06	0.75592	1.62201e-06
0.75836	2.7948e-06	0.75836	1.64764e-06	0.75836	1.63605e-06
0.7608	2.81006e-06	0.7608	1.6571e-06	0.7608	1.6507e-06
0.76324	2.82562e-06	0.76324	1.66748e-06	0.76324	1.66687e-06
0.76569	2.8418e-06	0.76569	1.67633e-06	0.76569	1.67816e-06
0.76813	2.85553e-06	0.76813	1.68701e-06	0.76813	1.69586e-06
0.77057	2.86957e-06	0.77057	1.69952e-06	0.77057	1.70929e-06
0.77301	2.88452e-06	0.77301	1.71112e-06	0.77301	1.72577e-06
0.77545	2.89795e-06	0.77545	1.72028e-06	0.77545	1.74133e-06
0.77789	2.91107e-06	0.77789	1.73187e-06	0.77789	1.7569e-06
0.78033	2.92358e-06	0.78033	1.74316e-06	0.78033	1.77185e-06
0.78278	2.93732e-06	0.78278	1.75385e-06	0.78278	1.78833e-06
0.78522	2.94952e-06	0.78522	1.76544e-06	0.78522	1.8045e-06
0.78766	2.96356e-06	0.78766	1.77704e-06	0.78766	1.8219e-06
0.7901	2.97577e-06	0.7901	1.78833e-06	0.7901	1.83899e-06
0.79254	2.9895e-06	0.79254	1.79993e-06	0.79254	1.85608e-06
0.79498	2.99835e-06	0.79498	1.81122e-06	0.79498	1.87103e-06
0.79742	3.01056e-06	0.79742	1.82281e-06	0.79742	1.88965e-06
0.79987	3.02063e-06	0.79987	1.83472e-06	0.79987	1.90674e-06
0.80231	3.03223e-06	0.80231	1.84814e-06	0.80231	1.92627e-06
0.80475	3.04138e-06	0.80475	1.85852e-06	0.80475	1.94061e-06
0.80719	3.05176e-06	0.80719	1.87195e-06	0.80719	1.95923e-06
0.80963	3.06427e-06	0.80963	1.88721e-06	0.80963	1.97662e-06
0.81207	3.07587e-06	0.81207	1.8988e-06	0.81207	1.99738e-06
0.81451	3.08533e-06	0.81451	1.9104e-06	0.81451	2.01385e-06
0.81696	3.09631e-06	0.81696	1.92566e-06	0.81696	2.03217e-06
0.8194	3.10577e-06	0.8194	1.93665e-06	0.8194	2.05139e-06
0.82184	3.11462e-06	0.82184	1.95068e-06	0.82184	2.07031e-06
0.82428	3.12317e-06	0.82428	1.9635e-06	0.82428	2.08984e-06
0.82672	3.1308e-06	0.82672	1.97754e-06	0.82672	2.10815e-06
0.82916	3.13812e-06	0.82916	1.98914e-06	0.82916	2.12646e-06
0.8316	3.14636e-06	0.8316	2.00592e-06	0.8316	2.14752e-06
0.83405	3.15186e-06	0.83405	2.01935e-06	0.83405	2.16644e-06
0.83649	3.15826e-06	0.83649	2.03339e-06	0.83649	2.18964e-06
0.83893	3.16345e-06	0.83893	2.0462e-06	0.83893	2.20642e-06
0.84137	3.17108e-06	0.84137	2.06177e-06	0.84137	2.22839e-06
0.84381	3.17505e-06	0.84381	2.0752e-06	0.84381	2.24945e-06
0.84625	3.17993e-06	0.84625	2.08984e-06	0.84625	2.26807e-06
0.84869	3.18451e-06	0.84869	2.10419e-06	0.84869	2.28973e-06
0.85114	3.18909e-06	0.85114	2.12036e-06	0.85114	2.31323e-06
0.85358	3.19458e-06	0.85358	2.13348e-06	0.85358	2.33337e-06
0.85602	3.20007e-06	0.85602	2.14966e-06	0.85602	2.35565e-06
0.85846	3.20221e-06	0.85846	2.164e-06	0.85846	2.3761e-06
0.8609	3.20404e-06	0.8609	2.17804e-06	0.8609	2.39899e-06
0.86334	3.20648e-06	0.86334	2.19299e-06	0.86334	2.41913e-06
0.86578	3.20984e-06	0.86578	2.20978e-06	0.86578	2.44202e-06
0.86823	3.21014e-06	0.86823	2.22504e-06	0.86823	2.46307e-06
0.87067	3.21228e-06	0.87067	2.24213e-06	0.87067	2.48749e-06
0.87311	3.21289e-06	0.87311	2.25586e-06	0.87311	2.50824e-06
0.87555	3.21442e-06	0.87555	2.27203e-06	0.87555	2.53296e-06
0.87799	3.21503e-06	0.87799	2.28729e-06	0.87799	2.55463e-06
0.88043	3.21533e-06	0.88043	2.30255e-06	0.88043	2.57996e-06
0.88287	3.21442e-06	0.88287	2.31903e-06	0.88287	2.60101e-06
0.88531	3.21381e-06	0.88531	2.33673e-06	0.88531	2.62421e-06
0.88776	3.21411e-06	0.88776	2.35138e-06	0.88776	2.64648e-06
0.8902	3.2132e-06	0.8902	2.36938e-06	0.8902	2.67303e-06
0.89264	3.21259e-06	0.89264	2.38525e-06	0.89264	2.69501e-06
0.89508	3.2132e-06	0.89508	2.40326e-06	0.89508	2.71973e-06
0.89752	3.2132e-06	0.89752	2.41791e-06	0.89752	2.74231e-06
0.89996	3.21228e-06	0.89996	2.43713e-06	0.89996	2.76855e-06
0.9024	3.21075e-06	0.9024	2.45239e-06	0.9024	2.79266e-06
0.90485	3.20984e-06	0.90485	2.47009e-06	0.90485	2.8183e-06
0.90729	3.20801e-06	0.90729	2.48627e-06	0.90729	2.84485e-06
0.90973	3.20587e-06	0.90973	2.50336e-06	0.90973	2.87048e-06
0.91217	3.20343e-06	0.91217	2.52045e-06	0.91217	2.89337e-06
0.91461	3.20282e-06	0.91461	2.53998e-06	0.91461	2.92145e-06
0.91705	3.20038e-06	0.91705	2.55646e-06	0.91705	2.94525e-06
0.91949	3.19763e-06	0.91949	2.5766e-06	0.91949	2.97241e-06
0.92194	3.19336e-06	0.92194	2.59186e-06	0.92194	2.99866e-06
0.92438	3.19031e-06	0.92438	2.6123e-06	0.92438	3.0249e-06
0.92682	3.18665e-06	0.92682	2.63092e-06	0.92682	3.05359e-06
0.92926	3.18512e-06	0.92926	2.65045e-06	0.92926	3.08075e-06
0.9317	3.17871e-06	0.9317	2.66815e-06	0.9317	3.10638e-06
0.93414	3.17749e-06	0.93414	2.6889e-06	0.93414	3.13599e-06
0.93658	3.17535e-06	0.93658	2.7063e-06	0.93658	3.15948e-06
0.93903	3.17413e-06	0.93903	2.72705e-06	0.93903	3.19e-06
0.94147	3.17078e-06	0.94147	2.74506e-06	0.94147	3.21625e-06
0.94391	3.16986e-06	0.94391	2.76031e-06	0.94391	3.24646e-06
0.94635	3.16742e-06	0.94635	2.77924e-06	0.94635	3.27423e-06
0.94879	3.16437e-06	0.94879	2.79938e-06	0.94879	3.30475e-06
0.95123	3.16498e-06	0.95123	2.81647e-06	0.95123	3.33282e-06
0.95367	3.16162e-06	0.95367	2.83386e-06	0.95367	3.36456e-06
0.95612	3.16071e-06	0.95612	2.85156e-06	0.95612	3.39294e-06
0.95856	3.15857e-06	0.95856	2.8714e-06	0.95856	3.42346e-06
0.961	3.15704e-06	0.961	2.88849e-06	0.961	3.45123e-06
0.96344	3.15674e-06	0.96344	2.9071e-06	0.96344	3.48114e-06
0.96588	3.1546e-06	0.96588	2.92664e-06	0.96588	3.51135e-06
0.96832	3.15216e-06	0.96832	2.94769e-06	0.96832	3.54523e-06
0.97076	3.15125e-06	0.97076	2.96448e-06	0.97076	3.57544e-06
0.97321	3.1488e-06	0.97321	2.98645e-06	0.97321	3.6084e-06
0.97565	3.14514e-06	0.97565	3.00293e-06	0.97565	3.64014e-06
0.97809	3.14514e-06	0.97809	3.02185e-06	0.97809	3.67004e-06
0.98053	3.1424e-06	0.98053	3.03955e-06	0.98053	3.703e-06
0.98297	3.14209e-06	0.98297	3.05695e-06	0.98297	3.73505e-06
0.98541	3.14178e-06	0.98541	3.07709e-06	0.98541	3.76862e-06
0.98785	3.13965e-06	0.98785	3.09723e-06	0.98785	3.80493e-06
0.9903	3.13934e-06	0.9903	3.11615e-06	0.9903	3.83484e-06
0.99274	3.13721e-06	0.99274	3.1369e-06	0.99274	3.87238e-06
0.99518	3.13538e-06	0.99518	3.15491e-06	0.99518	3.90442e-06
0.99762	3.1366e-06	0.99762	3.17444e-06	0.99762	3.94165e-06
1.00006	3.13751e-06	1.00006	3.19183e-06	1.00006	3.97522e-06
1.0025	3.13446e-06	1.0025	3.21136e-06	1.0025	4.01123e-06
1.00494	3.13416e-06	1.00494	3.23181e-06	1.00494	4.04724e-06
1.00739	3.13019e-06	1.00739	3.25287e-06	1.00739	4.08691e-06
1.00983	3.12714e-06	1.00983	3.27087e-06	1.00983	4.12048e-06
1.01227	3.12347e-06	1.01227	3.29163e-06	1.01227	4.15955e-06
1.01471	3.12012e-06	1.01471	3.30963e-06	1.01471	4.19617e-06
1.01715	3.12134e-06	1.01715	3.3313e-06	1.01715	4.2334e-06
1.01959	3.11768e-06	1.01959	3.34839e-06	1.01959	4.27155e-06
1.02203	3.11646e-06	1.02203	3.36792e-06	1.02203	4.31091e-06
1.02448	3.11737e-06	1.02448	3.38715e-06	1.02448	4.34753e-06
1.02692	3.11829e-06	1.02692	3.40942e-06	1.02692	4.38995e-06
1.02936	3.11737e-06	1.02936	3.42896e-06	1.02936	4.42993e-06
1.0318	3.12103e-06	1.0318	3.4491e-06	1.0318	4.47418e-06
1.03424	3.12225e-06	1.03424	3.46954e-06	1.03424	4.51172e-06
1.03668	3.12531e-06	1.03668	3.4906e-06	1.03668	4.55505e-06
1.03912	3.12714e-06	1.03912	3.50891e-06	1.03912	4.59717e-06
1.04156	3.12897e-06	1.04156	3.52875e-06	1.04156	4.63867e-06
1.04401	3.12897e-06	1.04401	3.54889e-06	1.04401	4.68292e-06
1.04645	3.13171e-06	1.04645	3.57117e-06	1.04645	4.73022e-06
1.04889	3.13385e-06	1.04889	3.58917e-06	1.04889	4.77173e-06
1.05133	3.13934e-06	1.05133	3.61084e-06	1.05133	4.82025e-06
1.05377	3.14087e-06	1.05377	3.62854e-06	1.05377	4.86145e-06
1.05621	3.14423e-06	1.05621	3.65082e-06	1.05621	4.91089e-06
1.05865	3.14636e-06	1.05865	3.66852e-06	1.05865	4.95667e-06
1.0611	3.14728e-06	1.0611	3.69171e-06	1.0611	5.00427e-06
1.06354	3.14911e-06	1.06354	3.71063e-06	1.06354	5.05096e-06
1.06598	3.15186e-06	1.06598	3.73474e-06	1.06598	5.10498e-06
1.06842	3.15308e-06	1.06842	3.75366e-06	1.06842	5.14954e-06
1.07086	3.15735e-06	1.07086	3.77563e-06	1.07086	5.19958e-06
1.0733	3.15887e-06	1.0733	3.79669e-06	1.0733	5.24933e-06
1.07574	3.1604e-06	1.07574	3.81989e-06	1.07574	5.30151e-06
1.07819	3.16101e-06	1.07819	3.83972e-06	1.07819	5.35156e-06
1.08063	3.16254e-06	1.08063	3.86139e-06	1.08063	5.40344e-06
1.08307	3.16467e-06	1.08307	3.88214e-06	1.08307	5.45532e-06
1.08551	3.16681e-06	1.08551	3.90625e-06	1.08551	5.50934e-06
1.08795	3.17108e-06	1.08795	3.92883e-06	1.08795	5.56244e-06
1.09039	3.1778e-06	1.09039	3.95203e-06	1.09039	5.61737e-06
1.09283	3.18237e-06	1.09283	3.974e-06	1.09283	5.66925e-06
1.09528	3.18848e-06	1.09528	3.99719e-06	1.09528	5.7254e-06
1.09772	3.19366e-06	1.09772	4.01947e-06	1.09772	5.78094e-06
1.10016	3.20129e-06	1.10016	4.04236e-06	1.10016	5.83832e-06
1.1026	3.20831e-06	1.1026	4.06769e-06	1.1026	5.89417e-06
1.10504	3.21533e-06	1.10504	4.09241e-06	1.10504	5.95245e-06
1.10748	3.2196e-06	1.10748	4.11469e-06	1.10748	6.00769e-06
1.10992	3.22693e-06	1.10992	4.1391e-06	1.10992	6.073e-06
1.11237	3.23212e-06	1.11237	4.16138e-06	1.11237	6.12793e-06
1.11481	3.2373e-06	1.11481	4.1864e-06	1.11481	6.18896e-06
1.11725	3.24371e-06	1.11725	4.20929e-06	1.11725	6.24695e-06
1.11969	3.25012e-06	1.11969	4.23401e-06	1.11969	6.30798e-06
1.12213	3.25378e-06	1.12213	4.25781e-06	1.12213	6.36597e-06
1.12457	3.26141e-06	1.12457	4.28528e-06	1.12457	6.427e-06
1.12701	3.26752e-06	1.12701	4.30847e-06	1.12701	6.48804e-06
1.12946	3.27332e-06	1.12946	4.33411e-06	1.12946	6.55212e-06
1.1319	3.27698e-06	1.1319	4.35852e-06	1.1319	6.61316e-06
1.13434	3.28094e-06	1.13434	4.38507e-06	1.13434	6.67725e-06
1.13678	3.28827e-06	1.13678	4.4104e-06	1.13678	6.74133e-06
1.13922	3.29346e-06	1.13922	4.43604e-06	1.13922	6.80237e-06
1.14166	3.30078e-06	1.14166	4.46167e-06	1.14166	6.86646e-06
1.1441	3.30994e-06	1.1441	4.49066e-06	1.1441	6.93359e-06
1.14655	3.31726e-06	1.14655	4.5163e-06	1.14655	6.99463e-06
1.14899	3.33008e-06	1.14899	4.54437e-06	1.14899	7.06177e-06
1.15143	3.33923e-06	1.15143	4.57092e-06	1.15143	7.12585e-06
1.15387	3.34961e-06	1.15387	4.60175e-06	1.15387	7.19604e-06
1.15631	3.35754e-06	1.15631	4.6286e-06	1.15631	7.25708e-06
1.15875	3.36334e-06	1.15875	4.65698e-06	1.15875	7.32422e-06
1.16119	3.3728e-06	1.16119	4.6875e-06	1.16119	7.39136e-06
1.16364	3.38348e-06	1.16364	4.7171e-06	1.16364	7.46155e-06
1.16608	3.38989e-06	1.16608	4.74396e-06	1.16608	7.52869e-06
1.16852	3.39722e-06	1.16852	4.77661e-06	1.16852	7.59888e-06
1.17096	3.40851e-06	1.17096	4.80591e-06	1.17096	7.66602e-06
1.1734	3.41827e-06	1.1734	4.83795e-06	1.1734	7.73621e-06
1.17584	3.42712e-06	1.17584	4.86816e-06	1.17584	7.80334e-06
1.17828	3.43506e-06	1.17828	4.90021e-06	1.17828	7.87354e-06
1.18073	3.44635e-06	1.18073	4.93225e-06	1.18073	7.94373e-06
1.18317	3.45673e-06	1.18317	4.96552e-06	1.18317	8.01697e-06
1.18561	3.46832e-06	1.18561	4.99939e-06	1.18561	8.08411e-06
1.18805	3.48267e-06	1.18805	5.03082e-06	1.18805	8.15735e-06
1.19049	3.49396e-06	1.19049	5.06439e-06	1.19049	8.22754e-06
1.19293	3.50861e-06	1.19293	5.09796e-06	1.19293	8.30078e-06
1.19537	3.52112e-06	1.19537	5.13245e-06	1.19537	8.37097e-06
1.19781	3.53394e-06	1.19781	5.16571e-06	1.19781	8.44421e-06
1.20026	3.54736e-06	1.20026	5.20172e-06	1.20026	8.51746e-06
1.2027	3.55957e-06	1.2027	5.23895e-06	1.2027	8.59375e-06
1.20514	3.5733e-06	1.20514	5.27374e-06	1.20514	8.66394e-06
1.20758	3.58704e-06	1.20758	5.31158e-06	1.20758	8.74023e-06
1.21002	3.59985e-06	1.21002	5.34698e-06	1.21002	8.81348e-06
1.21246	3.61359e-06	1.21246	5.38422e-06	1.21246	8.88977e-06
1.2149	3.62793e-06	1.2149	5.42023e-06	1.2149	8.96301e-06
1.21735	3.6441e-06	1.21735	5.4599e-06	1.21735	9.03931e-06
1.21979	3.65967e-06	1.21979	5.49774e-06	1.21979	9.1156e-06
1.22223	3.67584e-06	1.22223	5.5365e-06	1.22223	9.19495e-06
1.22467	3.69049e-06	1.22467	5.57526e-06	1.22467	9.27124e-06
1.22711	3.70911e-06	1.22711	5.61646e-06	1.22711	9.35059e-06
1.22955	3.72437e-06	1.22955	5.65491e-06	1.22955	9.42688e-06
1.23199	3.74329e-06	1.23199	5.69641e-06	1.23199	9.50928e-06
1.23444	3.7616e-06	1.23444	5.73608e-06	1.23444	9.58557e-06
1.23688	3.77869e-06	1.23688	5.7782e-06	1.23688	9.66797e-06
1.23932	3.79791e-06	1.23932	5.81787e-06	1.23932	9.74731e-06
1.24176	3.81683e-06	1.24176	5.86273e-06	1.24176	9.82971e-06
1.2442	3.83453e-06	1.2442	5.9024e-06	1.2442	9.90601e-06
1.24664	3.85223e-06	1.24664	5.94604e-06	1.24664	9.99146e-06
1.24908	3.86932e-06	1.24908	5.98816e-06	1.24908	1.00739e-05
1.25153	3.88763e-06	1.25153	6.03333e-06	1.25153	1.01532e-05
1.25397	3.90686e-06	1.25397	6.07605e-06	1.25397	1.02325e-05
1.25641	3.92639e-06	1.25641	6.12183e-06	1.25641	1.03149e-05
1.25885	3.94623e-06	1.25885	6.1676e-06	1.25885	1.04004e-05
1.26129	3.96698e-06	1.26129	6.21338e-06	1.26129	1.04858e-05
1.26373	3.98651e-06	1.26373	6.25916e-06	1.26373	1.05713e-05
1.26617	4.0094e-06	1.26617	6.30493e-06	1.26617	1.06598e-05
1.26862	4.02863e-06	1.26862	6.35071e-06	1.26862	1.07422e-05
1.27106	4.05273e-06	1.27106	6.39954e-06	1.27106	1.08307e-05
1.2735	4.07379e-06	1.2735	6.44836e-06	1.2735	1.09131e-05
1.27594	4.09851e-06	1.27594	6.49414e-06	1.27594	1.10016e-05
1.27838	4.12018e-06	1.27838	6.54297e-06	1.27838	1.10901e-05
1.28082	4.14581e-06	1.28082	6.5918e-06	1.28082	1.11816e-05
1.28326	4.16901e-06	1.28326	6.64063e-06	1.28326	1.12701e-05
1.28571	4.19617e-06	1.28571	6.6925e-06	1.28571	1.13586e-05
1.28815	4.22363e-06	1.28815	6.74133e-06	1.28815	1.14502e-05
1.29059	4.24713e-06	1.29059	6.79321e-06	1.29059	1.15417e-05
1.29303	4.27246e-06	1.29303	6.84204e-06	1.29303	1.16302e-05
1.29547	4.29871e-06	1.29547	6.89392e-06	1.29547	1.17188e-05
1.29791	4.32404e-06	1.29791	6.9458e-06	1.29791	1.18103e-05
1.30035	4.3515e-06	1.30035	7.00073e-06	1.30035	1.19049e-05
1.3028	4.37866e-06	1.3028	7.05261e-06	1.3028	1.19934e-05
1.30524	4.40674e-06	1.30524	7.10449e-06	1.30524	1.20911e-05
1.30768	4.43451e-06	1.30768	7.15942e-06	1.30768	1.21826e-05
1.31012	4.46381e-06	1.31012	7.21436e-06	1.31012	1.22803e-05
1.31256	4.49127e-06	1.31256	7.26624e-06	1.31256	1.23718e-05
1.315	4.51874e-06	1.315	7.32117e-06	1.315	1.24664e-05
1.31744	4.54803e-06	1.31744	7.37915e-06	1.31744	1.25641e-05
1.31989	4.57916e-06	1.31989	7.43713e-06	1.31989	1.26648e-05
1.32233	4.60602e-06	1.32233	7.49207e-06	1.32233	1.27594e-05
1.32477	4.6344e-06	1.32477	7.55005e-06	1.32477	1.28601e-05
1.32721	4.66339e-06	1.32721	7.60498e-06	1.32721	1.29578e-05
1.32965	4.69574e-06	1.32965	7.66602e-06	1.32965	1.30615e-05
1.33209	4.72504e-06	1.33209	7.724e-06	1.33209	1.31622e-05
1.33453	4.75861e-06	1.33453	7.78198e-06	1.33453	1.32629e-05
1.33698	4.78973e-06	1.33698	7.83997e-06	1.33698	1.33636e-05
1.33942	4.82574e-06	1.33942	7.901e-06	1.33942	1.34705e-05
1.34186	4.85748e-06	1.34186	7.95898e-06	1.34186	1.35742e-05
1.3443	4.89288e-06	1.3443	8.02307e-06	1.3443	1.3681e-05
1.34674	4.92401e-06	1.34674	8.08411e-06	1.34674	1.37848e-05
1.34918	4.96063e-06	1.34918	8.14819e-06	1.34918	1.38947e-05
1.35162	4.99023e-06	1.35162	8.20618e-06	1.35162	1.39954e-05
1.35406	5.02472e-06	1.35406	8.27026e-06	1.35406	1.41022e-05
1.35651	5.05798e-06	1.35651	8.33435e-06	1.35651	1.4212e-05
1.35895	5.0943e-06	1.35895	8.39844e-06	1.35895	1.43219e-05
1.36139	5.12756e-06	1.36139	8.46252e-06	1.36139	1.44257e-05
1.36383	5.1651e-06	1.36383	8.52966e-06	1.36383	1.45386e-05
1.36627	5.20111e-06	1.36627	8.59375e-06	1.36627	1.46423e-05
1.36871	5.23926e-06	1.36871	8.65784e-06	1.36871	1.47552e-05
1.37115	5.27771e-06	1.37115	8.72803e-06	1.37115	1.48621e-05
1.3736	5.31616e-06	1.3736	8.79211e-06	1.3736	1.49719e-05
1.37604	5.35614e-06	1.37604	8.8623e-06	1.37604	1.50848e-05
1.37848	5.4007e-06	1.37848	8.9325e-06	1.37848	1.51978e-05
1.38092	5.43884e-06	1.38092	8.99963e-06	1.38092	1.53076e-05
1.38336	5.48035e-06	1.38336	9.07288e-06	1.38336	1.54266e-05
1.3858	5.52063e-06	1.3858	9.14307e-06	1.3858	1.55396e-05
1.38824	5.56671e-06	1.38824	9.21631e-06	1.38824	1.56555e-05
1.39069	5.60883e-06	1.39069	9.2865e-06	1.39069	1.57684e-05
1.39313	5.65216e-06	1.39313	9.35974e-06	1.39313	1.58875e-05
1.39557	5.69672e-06	1.39557	9.43298e-06	1.39557	1.60065e-05
1.39801	5.74066e-06	1.39801	9.50928e-06	1.39801	1.61285e-05
1.40045	5.78186e-06	1.40045	9.57947e-06	1.40045	1.62445e-05
1.40289	5.83099e-06	1.40289	9.65881e-06	1.40289	1.63666e-05
1.40533	5.87463e-06	1.40533	9.73206e-06	1.40533	1.64856e-05
1.40778	5.9201e-06	1.40778	9.8114e-06	1.40778	1.66077e-05
1.41022	5.96832e-06	1.41022	9.8877e-06	1.41022	1.67297e-05
1.41266	6.01746e-06	1.41266	9.96399e-06	1.41266	1.68549e-05
1.4151	6.06995e-06	1.4151	1.00433e-05	1.4151	1.698e-05
1.41754	6.12488e-06	1.41754	1.01257e-05	1.41754	1.71082e-05
1.41998	6.17065e-06	1.41998	1.0202e-05	1.41998	1.72333e-05
1.42242	6.22253e-06	1.42242	1.02844e-05	1.42242	1.73645e-05
1.42487	6.27441e-06	1.42487	1.03638e-05	1.42487	1.74896e-05
1.42731	6.32629e-06	1.42731	1.04462e-05	1.42731	1.76239e-05
1.42975	6.37817e-06	1.42975	1.05255e-05	1.42975	1.7749e-05
1.43219	6.43311e-06	1.43219	1.0611e-05	1.43219	1.78833e-05
1.43463	6.48804e-06	1.43463	1.06934e-05	1.43463	1.80176e-05
1.43707	6.53992e-06	1.43707	1.07819e-05	1.43707	1.81549e-05
1.43951	6.5918e-06	1.43951	1.08643e-05	1.43951	1.82892e-05
1.44196	6.64978e-06	1.44196	1.09558e-05	1.44196	1.84296e-05
1.4444	6.70166e-06	1.4444	1.10413e-05	1.4444	1.85608e-05
1.44684	6.7627e-06	1.44684	1.11298e-05	1.44684	1.87042e-05
1.44928	6.82068e-06	1.44928	1.12183e-05	1.44928	1.88416e-05
1.45172	6.88171e-06	1.45172	1.13098e-05	1.45172	1.89819e-05
1.45416	6.9397e-06	1.45416	1.14014e-05	1.45416	1.91284e-05
1.4566	7.00073e-06	1.4566	1.1496e-05	1.4566	1.92749e-05
1.45905	7.05872e-06	1.45905	1.15845e-05	1.45905	1.94153e-05
1.46149	7.1228e-06	1.46149	1.16821e-05	1.46149	1.95648e-05
1.46393	7.18079e-06	1.46393	1.17737e-05	1.46393	1.97052e-05
1.46637	7.24792e-06	1.46637	1.18713e-05	1.46637	1.98608e-05
1.46881	7.30896e-06	1.46881	1.19659e-05	1.46881	2.00073e-05
1.47125	7.3761e-06	1.47125	1.20636e-05	1.47125	2.01569e-05
1.47369	7.44019e-06	1.47369	1.21613e-05	1.47369	2.03094e-05
1.47614	7.50732e-06	1.47614	1.2262e-05	1.47614	2.04681e-05
1.47858	7.57141e-06	1.47858	1.23596e-05	1.47858	2.06207e-05
1.48102	7.63855e-06	1.48102	1.24664e-05	1.48102	2.07794e-05
1.48346	7.70264e-06	1.48346	1.25641e-05	1.48346	2.09351e-05
1.4859	7.76978e-06	1.4859	1.26678e-05	1.4859	2.10938e-05
1.48834	7.83386e-06	1.48834	1.27716e-05	1.48834	2.12524e-05
1.49078	7.90405e-06	1.49078	1.28784e-05	1.49078	2.14111e-05
1.49323	7.97119e-06	1.49323	1.29852e-05	1.49323	2.15759e-05
1.49567	8.04443e-06	1.49567	1.30951e-05	1.49567	2.17438e-05
1.49811	8.11157e-06	1.49811	1.32019e-05	1.49811	2.19055e-05
1.50055	8.18481e-06	1.50055	1.33118e-05	1.50055	2.20764e-05

## Sheet: Figure S10(b)
-1.4975	-3.64532e-05	-1.4975	-1.02728e-05	-1.4975	-9.99969e-06
-1.49506	-2.95288e-05	-1.49506	-3.69522e-05	-1.49506	-6.20178e-05
-1.49261	-2.55432e-05	-1.49261	-3.31253e-05	-1.49261	-5.58167e-05
-1.49017	-2.29095e-05	-1.49017	-3.05405e-05	-1.49017	-5.14221e-05
-1.48773	-2.09991e-05	-1.48773	-2.86087e-05	-1.48773	-4.81415e-05
-1.48529	-1.95465e-05	-1.48529	-2.7095e-05	-1.48529	-4.55048e-05
-1.48285	-1.83899e-05	-1.48285	-2.5853e-05	-1.48285	-4.33197e-05
-1.48041	-1.74316e-05	-1.48041	-2.48001e-05	-1.48041	-4.14764e-05
-1.47797	-1.66199e-05	-1.47797	-2.38907e-05	-1.47797	-3.98804e-05
-1.47552	-1.5918e-05	-1.47552	-2.30911e-05	-1.47552	-3.82874e-05
-1.47308	-1.53015e-05	-1.47308	-2.2374e-05	-1.47308	-3.7027e-05
-1.47064	-1.47705e-05	-1.47064	-2.1727e-05	-1.47064	-3.59039e-05
-1.4682	-1.42792e-05	-1.4682	-2.1141e-05	-1.4682	-3.48663e-05
-1.46576	-1.38428e-05	-1.46576	-2.06039e-05	-1.46576	-3.39264e-05
-1.46332	-1.34277e-05	-1.46332	-2.01034e-05	-1.46332	-3.30475e-05
-1.46088	-1.30463e-05	-1.46088	-1.96457e-05	-1.46088	-3.22388e-05
-1.45844	-1.26953e-05	-1.45844	-1.92154e-05	-1.45844	-3.14819e-05
-1.45599	-1.2381e-05	-1.45599	-1.88064e-05	-1.45599	-3.07709e-05
-1.45355	-1.2088e-05	-1.45355	-1.84189e-05	-1.45355	-3.00995e-05
-1.45111	-1.18042e-05	-1.45111	-1.80649e-05	-1.45111	-2.94678e-05
-1.44867	-1.15295e-05	-1.44867	-1.772e-05	-1.44867	-2.88605e-05
-1.44623	-1.12701e-05	-1.44623	-1.73935e-05	-1.44623	-2.8299e-05
-1.44379	-1.10321e-05	-1.44379	-1.70853e-05	-1.44379	-2.77496e-05
-1.44135	-1.08063e-05	-1.44135	-1.67831e-05	-1.44135	-2.72369e-05
-1.4389	-1.05896e-05	-1.4389	-1.64993e-05	-1.4389	-2.67395e-05
-1.43646	-1.0379e-05	-1.43646	-1.62277e-05	-1.43646	-2.62665e-05
-1.43402	-1.01776e-05	-1.43402	-1.59592e-05	-1.43402	-2.58057e-05
-1.43158	-9.9884e-06	-1.43158	-1.57089e-05	-1.43158	-2.53723e-05
-1.42914	-9.80835e-06	-1.42914	-1.54648e-05	-1.42914	-2.4942e-05
-1.4267	-9.63135e-06	-1.4267	-1.52267e-05	-1.4267	-2.45392e-05
-1.42426	-9.46045e-06	-1.42426	-1.49979e-05	-1.42426	-2.41425e-05
-1.42181	-9.29871e-06	-1.42181	-1.47812e-05	-1.42181	-2.3764e-05
-1.41937	-9.14001e-06	-1.41937	-1.45676e-05	-1.41937	-2.33948e-05
-1.41693	-8.98438e-06	-1.41693	-1.436e-05	-1.41693	-2.30377e-05
-1.41449	-8.83484e-06	-1.41449	-1.41556e-05	-1.41449	-2.26837e-05
-1.41205	-8.69141e-06	-1.41205	-1.39633e-05	-1.41205	-2.23541e-05
-1.40961	-8.55408e-06	-1.40961	-1.3768e-05	-1.40961	-2.20215e-05
-1.40717	-8.42285e-06	-1.40717	-1.35818e-05	-1.40717	-2.17041e-05
-1.40472	-8.29468e-06	-1.40472	-1.33987e-05	-1.40472	-2.13959e-05
-1.40228	-8.17261e-06	-1.40228	-1.32187e-05	-1.40228	-2.10938e-05
-1.39984	-8.05359e-06	-1.39984	-1.30447e-05	-1.39984	-2.08008e-05
-1.3974	-7.93457e-06	-1.3974	-1.28738e-05	-1.3974	-2.05109e-05
-1.39496	-7.8186e-06	-1.39496	-1.27029e-05	-1.39496	-2.02271e-05
-1.39252	-7.70874e-06	-1.39252	-1.25412e-05	-1.39252	-1.99554e-05
-1.39008	-7.59583e-06	-1.39008	-1.23794e-05	-1.39008	-1.96808e-05
-1.38763	-7.48901e-06	-1.38763	-1.22238e-05	-1.38763	-1.94244e-05
-1.38519	-7.38525e-06	-1.38519	-1.20712e-05	-1.38519	-1.91681e-05
-1.38275	-7.28455e-06	-1.38275	-1.19217e-05	-1.38275	-1.89178e-05
-1.38031	-7.18079e-06	-1.38031	-1.17782e-05	-1.38031	-1.86737e-05
-1.37787	-7.08923e-06	-1.37787	-1.16318e-05	-1.37787	-1.84326e-05
-1.37543	-7.00073e-06	-1.37543	-1.14883e-05	-1.37543	-1.81946e-05
-1.37299	-6.91223e-06	-1.37299	-1.13541e-05	-1.37299	-1.79657e-05
-1.37054	-6.81458e-06	-1.37054	-1.12137e-05	-1.37054	-1.77368e-05
-1.3681	-6.72607e-06	-1.3681	-1.10855e-05	-1.3681	-1.75171e-05
-1.36566	-6.64063e-06	-1.36566	-1.09512e-05	-1.36566	-1.72943e-05
-1.36322	-6.56433e-06	-1.36322	-1.08261e-05	-1.36322	-1.70837e-05
-1.36078	-6.48193e-06	-1.36078	-1.0701e-05	-1.36078	-1.68732e-05
-1.35834	-6.40564e-06	-1.35834	-1.0582e-05	-1.35834	-1.66656e-05
-1.3559	-6.32324e-06	-1.3559	-1.04599e-05	-1.3559	-1.64581e-05
-1.35345	-6.25e-06	-1.35345	-1.0347e-05	-1.35345	-1.62628e-05
-1.35101	-6.17065e-06	-1.35101	-1.0231e-05	-1.35101	-1.60614e-05
-1.34857	-6.10046e-06	-1.34857	-1.01211e-05	-1.34857	-1.58722e-05
-1.34613	-6.02722e-06	-1.34613	-1.00021e-05	-1.34613	-1.56769e-05
-1.34369	-5.95703e-06	-1.34369	-9.89837e-06	-1.34369	-1.54907e-05
-1.34125	-5.88684e-06	-1.34125	-9.78545e-06	-1.34125	-1.53076e-05
-1.33881	-5.8197e-06	-1.33881	-9.67559e-06	-1.33881	-1.51245e-05
-1.33636	-5.75562e-06	-1.33636	-9.56572e-06	-1.33636	-1.49445e-05
-1.33392	-5.69153e-06	-1.33392	-9.45891e-06	-1.33392	-1.47736e-05
-1.33148	-5.62744e-06	-1.33148	-9.35515e-06	-1.33148	-1.45996e-05
-1.32904	-5.56641e-06	-1.32904	-9.25445e-06	-1.32904	-1.44318e-05
-1.3266	-5.50537e-06	-1.3266	-9.15069e-06	-1.3266	-1.42609e-05
-1.32416	-5.44434e-06	-1.32416	-9.04998e-06	-1.32416	-1.4093e-05
-1.32172	-5.38635e-06	-1.32172	-8.95232e-06	-1.32172	-1.39282e-05
-1.31927	-5.32837e-06	-1.31927	-8.85467e-06	-1.31927	-1.37665e-05
-1.31683	-5.27039e-06	-1.31683	-8.75701e-06	-1.31683	-1.36047e-05
-1.31439	-5.21545e-06	-1.31439	-8.65935e-06	-1.31439	-1.3446e-05
-1.31195	-5.15747e-06	-1.31195	-8.56475e-06	-1.31195	-1.32904e-05
-1.30951	-5.10254e-06	-1.30951	-8.4732e-06	-1.30951	-1.31439e-05
-1.30707	-5.04761e-06	-1.30707	-8.37859e-06	-1.30707	-1.29913e-05
-1.30463	-4.99268e-06	-1.30463	-8.29009e-06	-1.30463	-1.28448e-05
-1.30219	-4.9408e-06	-1.30219	-8.19854e-06	-1.30219	-1.26953e-05
-1.29974	-4.88586e-06	-1.29974	-8.11004e-06	-1.29974	-1.25549e-05
-1.2973	-4.83093e-06	-1.2973	-8.02154e-06	-1.2973	-1.24084e-05
-1.29486	-4.78516e-06	-1.29486	-7.93914e-06	-1.29486	-1.22681e-05
-1.29242	-4.73755e-06	-1.29242	-7.85064e-06	-1.29242	-1.21277e-05
-1.28998	-4.69391e-06	-1.28998	-7.76824e-06	-1.28998	-1.19904e-05
-1.28754	-4.65332e-06	-1.28754	-7.68584e-06	-1.28754	-1.18561e-05
-1.2851	-4.61853e-06	-1.2851	-7.60344e-06	-1.2851	-1.17249e-05
-1.28265	-4.58008e-06	-1.28265	-7.5241e-06	-1.28265	-1.15936e-05
-1.28021	-4.53339e-06	-1.28021	-7.4417e-06	-1.28021	-1.14624e-05
-1.27777	-4.48883e-06	-1.27777	-7.36236e-06	-1.27777	-1.13312e-05
-1.27533	-4.44366e-06	-1.27533	-7.28301e-06	-1.27533	-1.12061e-05
-1.27289	-4.40094e-06	-1.27289	-7.20366e-06	-1.27289	-1.10748e-05
-1.27045	-4.36127e-06	-1.27045	-7.13042e-06	-1.27045	-1.09528e-05
-1.26801	-4.32037e-06	-1.26801	-7.05108e-06	-1.26801	-1.08276e-05
-1.26556	-4.28284e-06	-1.26556	-6.97783e-06	-1.26556	-1.07086e-05
-1.26312	-4.24927e-06	-1.26312	-6.90459e-06	-1.26312	-1.05865e-05
-1.26068	-4.21448e-06	-1.26068	-6.8283e-06	-1.26068	-1.04675e-05
-1.25824	-4.17572e-06	-1.25824	-6.752e-06	-1.25824	-1.03455e-05
-1.2558	-4.14215e-06	-1.2558	-6.67876e-06	-1.2558	-1.02325e-05
-1.25336	-4.10645e-06	-1.25336	-6.60552e-06	-1.25336	-1.01135e-05
-1.25092	-4.07349e-06	-1.25092	-6.53533e-06	-1.25092	-1.00006e-05
-1.24847	-4.04022e-06	-1.24847	-6.46514e-06	-1.24847	-9.8877e-06
-1.24603	-4.00635e-06	-1.24603	-6.39495e-06	-1.24603	-9.77783e-06
-1.24359	-3.97186e-06	-1.24359	-6.32476e-06	-1.24359	-9.66797e-06
-1.24115	-3.94012e-06	-1.24115	-6.25762e-06	-1.24115	-9.55505e-06
-1.23871	-3.90503e-06	-1.23871	-6.18743e-06	-1.23871	-9.44519e-06
-1.23627	-3.87329e-06	-1.23627	-6.12334e-06	-1.23627	-9.33838e-06
-1.23383	-3.83911e-06	-1.23383	-6.0562e-06	-1.23383	-9.22852e-06
-1.23138	-3.80768e-06	-1.23138	-5.99212e-06	-1.23138	-9.12476e-06
-1.22894	-3.78143e-06	-1.22894	-5.92803e-06	-1.22894	-9.01794e-06
-1.2265	-3.75183e-06	-1.2265	-5.86089e-06	-1.2265	-8.91113e-06
-1.22406	-3.72406e-06	-1.22406	-5.80291e-06	-1.22406	-8.81042e-06
-1.22162	-3.69324e-06	-1.22162	-5.73882e-06	-1.22162	-8.70667e-06
-1.21918	-3.66669e-06	-1.21918	-5.67473e-06	-1.21918	-8.60291e-06
-1.21674	-3.64075e-06	-1.21674	-5.61675e-06	-1.21674	-8.50525e-06
-1.21429	-3.61267e-06	-1.21429	-5.55266e-06	-1.21429	-8.40149e-06
-1.21185	-3.59039e-06	-1.21185	-5.49773e-06	-1.21185	-8.30383e-06
-1.20941	-3.56415e-06	-1.20941	-5.4367e-06	-1.20941	-8.20313e-06
-1.20697	-3.53882e-06	-1.20697	-5.37566e-06	-1.20697	-8.10547e-06
-1.20453	-3.51318e-06	-1.20453	-5.31463e-06	-1.20453	-8.00781e-06
-1.20209	-3.48999e-06	-1.20209	-5.25969e-06	-1.20209	-7.9071e-06
-1.19965	-3.46649e-06	-1.19965	-5.19866e-06	-1.19965	-7.80945e-06
-1.1972	-3.44452e-06	-1.1972	-5.14068e-06	-1.1972	-7.7179e-06
-1.19476	-3.42072e-06	-1.19476	-5.08574e-06	-1.19476	-7.61719e-06
-1.19232	-3.39966e-06	-1.19232	-5.03325e-06	-1.19232	-7.52258e-06
-1.18988	-3.37463e-06	-1.18988	-4.97191e-06	-1.18988	-7.42493e-06
-1.18744	-3.35266e-06	-1.18744	-4.91546e-06	-1.18744	-7.33337e-06
-1.185	-3.32764e-06	-1.185	-4.86052e-06	-1.185	-7.23877e-06
-1.18256	-3.30444e-06	-1.18256	-4.80407e-06	-1.18256	-7.14417e-06
-1.18011	-3.28217e-06	-1.18011	-4.74914e-06	-1.18011	-7.05261e-06
-1.17767	-3.2608e-06	-1.17767	-4.69542e-06	-1.17767	-6.96411e-06
-1.17523	-3.23914e-06	-1.17523	-4.64202e-06	-1.17523	-6.86951e-06
-1.17279	-3.21472e-06	-1.17279	-4.58922e-06	-1.17279	-6.78101e-06
-1.17035	-3.19e-06	-1.17035	-4.53399e-06	-1.17035	-6.68945e-06
-1.16791	-3.16895e-06	-1.16791	-4.48241e-06	-1.16791	-6.60095e-06
-1.16547	-3.14575e-06	-1.16547	-4.42931e-06	-1.16547	-6.51245e-06
-1.16302	-3.12347e-06	-1.16302	-4.37865e-06	-1.16302	-6.42395e-06
-1.16058	-3.09937e-06	-1.16058	-4.32464e-06	-1.16058	-6.3385e-06
-1.15814	-3.07739e-06	-1.15814	-4.27703e-06	-1.15814	-6.25305e-06
-1.1557	-3.05359e-06	-1.1557	-4.22454e-06	-1.1557	-6.16455e-06
-1.15326	-3.03101e-06	-1.15326	-4.17388e-06	-1.15326	-6.08215e-06
-1.15082	-3.01239e-06	-1.15082	-4.12261e-06	-1.15082	-5.99365e-06
-1.14838	-2.99469e-06	-1.14838	-4.07317e-06	-1.14838	-5.91125e-06
-1.14594	-2.97638e-06	-1.14594	-4.02343e-06	-1.14594	-5.82886e-06
-1.14349	-2.96021e-06	-1.14349	-3.97368e-06	-1.14349	-5.74341e-06
-1.14105	-2.94067e-06	-1.14105	-3.92516e-06	-1.14105	-5.65796e-06
-1.13861	-2.92419e-06	-1.13861	-3.87816e-06	-1.13861	-5.57861e-06
-1.13617	-2.9068e-06	-1.13617	-3.82964e-06	-1.13617	-5.49622e-06
-1.13373	-2.88818e-06	-1.13373	-3.78447e-06	-1.13373	-5.41687e-06
-1.13129	-2.86896e-06	-1.13129	-3.73717e-06	-1.13129	-5.33447e-06
-1.12885	-2.85248e-06	-1.12885	-3.69201e-06	-1.12885	-5.25818e-06
-1.1264	-2.83173e-06	-1.1264	-3.6444e-06	-1.1264	-5.17578e-06
-1.12396	-2.81433e-06	-1.12396	-3.59893e-06	-1.12396	-5.09949e-06
-1.12152	-2.79449e-06	-1.12152	-3.55498e-06	-1.12152	-5.01709e-06
-1.11908	-2.77893e-06	-1.11908	-3.51287e-06	-1.11908	-4.9408e-06
-1.11664	-2.76245e-06	-1.11664	-3.46801e-06	-1.11664	-4.8645e-06
-1.1142	-2.74628e-06	-1.1142	-3.42803e-06	-1.1142	-4.79126e-06
-1.11176	-2.72736e-06	-1.11176	-3.38439e-06	-1.11176	-4.72046e-06
-1.10931	-2.70935e-06	-1.10931	-3.34075e-06	-1.10931	-4.6463e-06
-1.10687	-2.69165e-06	-1.10687	-3.30016e-06	-1.10687	-4.57001e-06
-1.10443	-2.67303e-06	-1.10443	-3.25835e-06	-1.10443	-4.4986e-06
-1.10199	-2.65594e-06	-1.10199	-3.21929e-06	-1.10199	-4.42535e-06
-1.09955	-2.63885e-06	-1.09955	-3.1784e-06	-1.09955	-4.3573e-06
-1.09711	-2.62421e-06	-1.09711	-3.13872e-06	-1.09711	-4.28558e-06
-1.09467	-2.60895e-06	-1.09467	-3.09905e-06	-1.09467	-4.21722e-06
-1.09222	-2.59277e-06	-1.09222	-3.05938e-06	-1.09222	-4.14795e-06
-1.08978	-2.57568e-06	-1.08978	-3.02184e-06	-1.08978	-4.08173e-06
-1.08734	-2.56012e-06	-1.08734	-2.984e-06	-1.08734	-4.01489e-06
-1.0849	-2.54486e-06	-1.0849	-2.94799e-06	-1.0849	-3.94867e-06
-1.08246	-2.52991e-06	-1.08246	-2.90984e-06	-1.08246	-3.88153e-06
-1.08002	-2.51556e-06	-1.08002	-2.87383e-06	-1.08002	-3.81866e-06
-1.07758	-2.50092e-06	-1.07758	-2.83599e-06	-1.07758	-3.75458e-06
-1.07513	-2.48627e-06	-1.07513	-2.80059e-06	-1.07513	-3.69293e-06
-1.07269	-2.47192e-06	-1.07269	-2.76488e-06	-1.07269	-3.62976e-06
-1.07025	-2.45728e-06	-1.07025	-2.73192e-06	-1.07025	-3.57117e-06
-1.06781	-2.44507e-06	-1.06781	-2.69652e-06	-1.06781	-3.51318e-06
-1.06537	-2.43317e-06	-1.06537	-2.66234e-06	-1.06537	-3.45551e-06
-1.06293	-2.41852e-06	-1.06293	-2.62664e-06	-1.06293	-3.3963e-06
-1.06049	-2.40509e-06	-1.06049	-2.59582e-06	-1.06049	-3.34106e-06
-1.05804	-2.38983e-06	-1.05804	-2.56377e-06	-1.05804	-3.28613e-06
-1.0556	-2.37946e-06	-1.0556	-2.53264e-06	-1.0556	-3.2312e-06
-1.05316	-2.36694e-06	-1.05316	-2.49968e-06	-1.05316	-3.17688e-06
-1.05072	-2.35199e-06	-1.05072	-2.47008e-06	-1.05072	-3.12378e-06
-1.04828	-2.33978e-06	-1.04828	-2.44079e-06	-1.04828	-3.07404e-06
-1.04584	-2.32574e-06	-1.04584	-2.41149e-06	-1.04584	-3.01971e-06
-1.0434	-2.31232e-06	-1.0434	-2.38372e-06	-1.0434	-2.96661e-06
-1.04095	-2.29889e-06	-1.04095	-2.35381e-06	-1.04095	-2.91718e-06
-1.03851	-2.28363e-06	-1.03851	-2.3236e-06	-1.03851	-2.86743e-06
-1.03607	-2.27142e-06	-1.03607	-2.29796e-06	-1.03607	-2.81738e-06
-1.03363	-2.25861e-06	-1.03363	-2.27019e-06	-1.03363	-2.76733e-06
-1.03119	-2.24945e-06	-1.03119	-2.24547e-06	-1.03119	-2.72034e-06
-1.02875	-2.23969e-06	-1.02875	-2.21892e-06	-1.02875	-2.67212e-06
-1.02631	-2.22717e-06	-1.02631	-2.19146e-06	-1.02631	-2.62482e-06
-1.02386	-2.21313e-06	-1.02386	-2.16674e-06	-1.02386	-2.57782e-06
-1.02142	-2.19971e-06	-1.02142	-2.1411e-06	-1.02142	-2.53418e-06
-1.01898	-2.19086e-06	-1.01898	-2.11425e-06	-1.01898	-2.48901e-06
-1.01654	-2.17926e-06	-1.01654	-2.09166e-06	-1.01654	-2.44476e-06
-1.0141	-2.16736e-06	-1.0141	-2.06634e-06	-1.0141	-2.3999e-06
-1.01166	-2.15454e-06	-1.01166	-2.04406e-06	-1.01166	-2.35779e-06
-1.00922	-2.14203e-06	-1.00922	-2.01995e-06	-1.00922	-2.31506e-06
-1.00677	-2.13013e-06	-1.00677	-1.99737e-06	-1.00677	-2.27295e-06
-1.00433	-2.11761e-06	-1.00433	-1.97448e-06	-1.00433	-2.23145e-06
-1.00189	-2.10663e-06	-1.00189	-1.9525e-06	-1.00189	-2.19238e-06
-0.99945	-2.09808e-06	-0.99945	-1.92992e-06	-0.99945	-2.15057e-06
-0.99701	-2.08832e-06	-0.99701	-1.90947e-06	-0.99701	-2.11212e-06
-0.99457	-2.07611e-06	-0.99457	-1.88598e-06	-0.99457	-2.07275e-06
-0.99213	-2.06268e-06	-0.99213	-1.86706e-06	-0.99213	-2.03522e-06
-0.98969	-2.052e-06	-0.98969	-1.84478e-06	-0.98969	-1.9986e-06
-0.98724	-2.03918e-06	-0.98724	-1.82433e-06	-0.98724	-1.96259e-06
-0.9848	-2.0282e-06	-0.9848	-1.80419e-06	-0.9848	-1.92566e-06
-0.98236	-2.0163e-06	-0.98236	-1.78588e-06	-0.98236	-1.89178e-06
-0.97992	-2.00836e-06	-0.97992	-1.76574e-06	-0.97992	-1.85516e-06
-0.97748	-1.99951e-06	-0.97748	-1.7459e-06	-0.97748	-1.82281e-06
-0.97504	-1.98883e-06	-0.97504	-1.72667e-06	-0.97504	-1.78925e-06
-0.9726	-1.97693e-06	-0.9726	-1.70714e-06	-0.9726	-1.75568e-06
-0.97015	-1.96655e-06	-0.97015	-1.68761e-06	-0.97015	-1.72302e-06
-0.96771	-1.95557e-06	-0.96771	-1.66839e-06	-0.96771	-1.69312e-06
-0.96527	-1.94519e-06	-0.96527	-1.65069e-06	-0.96527	-1.66077e-06
-0.96283	-1.9342e-06	-0.96283	-1.6336e-06	-0.96283	-1.62994e-06
-0.96039	-1.92261e-06	-0.96039	-1.61254e-06	-0.96039	-1.59912e-06
-0.95795	-1.91162e-06	-0.95795	-1.59911e-06	-0.95795	-1.57074e-06
-0.95551	-1.90002e-06	-0.95551	-1.58111e-06	-0.95551	-1.54114e-06
-0.95306	-1.89484e-06	-0.95306	-1.56341e-06	-0.95306	-1.51215e-06
-0.95062	-1.88324e-06	-0.95062	-1.54693e-06	-0.95062	-1.48376e-06
-0.94818	-1.87531e-06	-0.94818	-1.53197e-06	-0.94818	-1.45569e-06
-0.94574	-1.8631e-06	-0.94574	-1.51732e-06	-0.94574	-1.42975e-06
-0.9433	-1.85394e-06	-0.9433	-1.50084e-06	-0.9433	-1.40259e-06
-0.94086	-1.84631e-06	-0.94086	-1.48467e-06	-0.94086	-1.37451e-06
-0.93842	-1.83655e-06	-0.93842	-1.46972e-06	-0.93842	-1.35101e-06
-0.93597	-1.82556e-06	-0.93597	-1.45446e-06	-0.93597	-1.32507e-06
-0.93353	-1.81519e-06	-0.93353	-1.44103e-06	-0.93353	-1.29883e-06
-0.93109	-1.80481e-06	-0.93109	-1.42486e-06	-0.93109	-1.27441e-06
-0.92865	-1.79626e-06	-0.92865	-1.41082e-06	-0.92865	-1.25e-06
-0.92621	-1.7868e-06	-0.92621	-1.398e-06	-0.92621	-1.2262e-06
-0.92377	-1.77612e-06	-0.92377	-1.38396e-06	-0.92377	-1.20331e-06
-0.92133	-1.76758e-06	-0.92133	-1.36901e-06	-0.92133	-1.17859e-06
-0.91888	-1.75903e-06	-0.91888	-1.3568e-06	-0.91888	-1.15692e-06
-0.91644	-1.75079e-06	-0.91644	-1.34276e-06	-0.91644	-1.13525e-06
-0.914	-1.74194e-06	-0.914	-1.32964e-06	-0.914	-1.11542e-06
-0.91156	-1.73218e-06	-0.91156	-1.31591e-06	-0.91156	-1.09253e-06
-0.90912	-1.72058e-06	-0.90912	-1.30309e-06	-0.90912	-1.07147e-06
-0.90668	-1.71173e-06	-0.90668	-1.28966e-06	-0.90668	-1.05103e-06
-0.90424	-1.70349e-06	-0.90424	-1.27868e-06	-0.90424	-1.03241e-06
-0.90179	-1.69189e-06	-0.90179	-1.268e-06	-0.90179	-1.01044e-06
-0.89935	-1.68396e-06	-0.89935	-1.25426e-06	-0.89935	-9.92737e-07
-0.89691	-1.67328e-06	-0.89691	-1.24297e-06	-0.89691	-9.72595e-07
-0.89447	-1.66565e-06	-0.89447	-1.2326e-06	-0.89447	-9.53979e-07
-0.89203	-1.65741e-06	-0.89203	-1.22039e-06	-0.89203	-9.36584e-07
-0.88959	-1.64795e-06	-0.88959	-1.20849e-06	-0.88959	-9.18579e-07
-0.88715	-1.6391e-06	-0.88715	-1.19628e-06	-0.88715	-8.99658e-07
-0.8847	-1.62994e-06	-0.8847	-1.18621e-06	-0.8847	-8.83179e-07
-0.88226	-1.6217e-06	-0.88226	-1.17461e-06	-0.88226	-8.65784e-07
-0.87982	-1.61316e-06	-0.87982	-1.16454e-06	-0.87982	-8.5022e-07
-0.87738	-1.6037e-06	-0.87738	-1.15355e-06	-0.87738	-8.34656e-07
-0.87494	-1.59515e-06	-0.87494	-1.14287e-06	-0.87494	-8.17871e-07
-0.8725	-1.586e-06	-0.8725	-1.13341e-06	-0.8725	-8.02307e-07
-0.87006	-1.57745e-06	-0.87006	-1.12151e-06	-0.87006	-7.85828e-07
-0.86761	-1.56555e-06	-0.86761	-1.11327e-06	-0.86761	-7.69348e-07
-0.86517	-1.55701e-06	-0.86517	-1.1032e-06	-0.86517	-7.56531e-07
-0.86273	-1.54663e-06	-0.86273	-1.09252e-06	-0.86273	-7.40356e-07
-0.86029	-1.53748e-06	-0.86029	-1.08489e-06	-0.86029	-7.28455e-07
-0.85785	-1.52863e-06	-0.85785	-1.07543e-06	-0.85785	-7.13196e-07
-0.85541	-1.51825e-06	-0.85541	-1.06505e-06	-0.85541	-6.97632e-07
-0.85297	-1.50757e-06	-0.85297	-1.05773e-06	-0.85297	-6.82983e-07
-0.85052	-1.49902e-06	-0.85052	-1.04796e-06	-0.85052	-6.70776e-07
-0.84808	-1.48926e-06	-0.84808	-1.03789e-06	-0.84808	-6.5979e-07
-0.84564	-1.4801e-06	-0.84564	-1.03148e-06	-0.84564	-6.45447e-07
-0.8432	-1.47064e-06	-0.8432	-1.0205e-06	-0.8432	-6.32324e-07
-0.84076	-1.46057e-06	-0.84076	-1.01317e-06	-0.84076	-6.21643e-07
-0.83832	-1.45172e-06	-0.83832	-1.00585e-06	-0.83832	-6.07605e-07
-0.83588	-1.44318e-06	-0.83588	-9.9822e-07	-0.83588	-5.96619e-07
-0.83344	-1.43494e-06	-0.83344	-9.91506e-07	-0.83344	-5.84717e-07
-0.83099	-1.4267e-06	-0.83099	-9.82656e-07	-0.83099	-5.73425e-07
-0.82855	-1.41968e-06	-0.82855	-9.75332e-07	-0.82855	-5.62744e-07
-0.82611	-1.41205e-06	-0.82611	-9.68618e-07	-0.82611	-5.51758e-07
-0.82367	-1.40381e-06	-0.82367	-9.57937e-07	-0.82367	-5.38025e-07
-0.82123	-1.39709e-06	-0.82123	-9.5519e-07	-0.82123	-5.2887e-07
-0.81879	-1.38916e-06	-0.81879	-9.45119e-07	-0.81879	-5.17578e-07
-0.81635	-1.38e-06	-0.81635	-9.39321e-07	-0.81635	-5.07202e-07
-0.8139	-1.37024e-06	-0.8139	-9.33218e-07	-0.8139	-4.95605e-07
-0.81146	-1.36078e-06	-0.81146	-9.26199e-07	-0.81146	-4.86755e-07
-0.80902	-1.35071e-06	-0.80902	-9.18874e-07	-0.80902	-4.76074e-07
-0.80658	-1.34277e-06	-0.80658	-9.13686e-07	-0.80658	-4.66614e-07
-0.80414	-1.33362e-06	-0.80414	-9.06972e-07	-0.80414	-4.54712e-07
-0.8017	-1.3269e-06	-0.8017	-9.01784e-07	-0.8017	-4.4574e-07
-0.79926	-1.31897e-06	-0.79926	-8.94765e-07	-0.79926	-4.35638e-07
-0.79681	-1.31165e-06	-0.79681	-8.89577e-07	-0.79681	-4.28619e-07
-0.79437	-1.3028e-06	-0.79437	-8.82558e-07	-0.79437	-4.18274e-07
-0.79193	-1.29333e-06	-0.79193	-8.7676e-07	-0.79193	-4.0918e-07
-0.78949	-1.28632e-06	-0.78949	-8.71267e-07	-0.78949	-4.00116e-07
-0.78705	-1.27655e-06	-0.78705	-8.65163e-07	-0.78705	-3.91724e-07
-0.78461	-1.26831e-06	-0.78461	-8.59365e-07	-0.78461	-3.83484e-07
-0.78217	-1.26129e-06	-0.78217	-8.54787e-07	-0.78217	-3.73962e-07
-0.77972	-1.25153e-06	-0.77972	-8.49599e-07	-0.77972	-3.64838e-07
-0.77728	-1.24451e-06	-0.77728	-8.43801e-07	-0.77728	-3.56873e-07
-0.77484	-1.23566e-06	-0.77484	-8.37698e-07	-0.77484	-3.48511e-07
-0.7724	-1.22772e-06	-0.7724	-8.30984e-07	-0.7724	-3.40424e-07
-0.76996	-1.21979e-06	-0.76996	-8.26406e-07	-0.76996	-3.3252e-07
-0.76752	-1.21246e-06	-0.76752	-8.20913e-07	-0.76752	-3.25348e-07
-0.76508	-1.20483e-06	-0.76508	-8.1542e-07	-0.76508	-3.15277e-07
-0.76263	-1.1972e-06	-0.76263	-8.12368e-07	-0.76263	-3.08777e-07
-0.76019	-1.18958e-06	-0.76019	-8.06264e-07	-0.76019	-3.00934e-07
-0.75775	-1.18073e-06	-0.75775	-8.03213e-07	-0.75775	-2.93854e-07
-0.75531	-1.1731e-06	-0.75531	-7.95583e-07	-0.75531	-2.88483e-07
-0.75287	-1.16455e-06	-0.75287	-7.92226e-07	-0.75287	-2.80457e-07
-0.75043	-1.15692e-06	-0.75043	-7.84902e-07	-0.75043	-2.72186e-07
-0.74799	-1.14929e-06	-0.74799	-7.83071e-07	-0.74799	-2.68219e-07
-0.74554	-1.1438e-06	-0.74554	-7.77883e-07	-0.74554	-2.6123e-07
-0.7431	-1.13495e-06	-0.7431	-7.73916e-07	-0.7431	-2.54791e-07
-0.74066	-1.12823e-06	-0.74066	-7.70254e-07	-0.74066	-2.48596e-07
-0.73822	-1.12e-06	-0.73822	-7.64761e-07	-0.73822	-2.4234e-07
-0.73578	-1.11237e-06	-0.73578	-7.62014e-07	-0.73578	-2.37457e-07
-0.73334	-1.10504e-06	-0.73334	-7.56216e-07	-0.73334	-2.32178e-07
-0.7309	-1.09711e-06	-0.7309	-7.53164e-07	-0.7309	-2.26807e-07
-0.72845	-1.08948e-06	-0.72845	-7.49197e-07	-0.72845	-2.2168e-07
-0.72601	-1.08002e-06	-0.72601	-7.45718e-07	-0.72601	-2.16034e-07
-0.72357	-1.07544e-06	-0.72357	-7.41445e-07	-0.72357	-2.10419e-07
-0.72113	-1.06781e-06	-0.72113	-7.37142e-07	-0.72113	-2.06055e-07
-0.71869	-1.05896e-06	-0.71869	-7.35586e-07	-0.71869	-2.01599e-07
-0.71625	-1.05286e-06	-0.71625	-7.32748e-07	-0.71625	-1.96991e-07
-0.71381	-1.04645e-06	-0.71381	-7.2817e-07	-0.71381	-1.90918e-07
-0.71136	-1.03729e-06	-0.71136	-7.26186e-07	-0.71136	-1.85486e-07
-0.70892	-1.02997e-06	-0.70892	-7.23867e-07	-0.70892	-1.82556e-07
-0.70648	-1.02081e-06	-0.70648	-7.1935e-07	-0.70648	-1.77826e-07
-0.70404	-1.01318e-06	-0.70404	-7.16177e-07	-0.70404	-1.73615e-07
-0.7016	-1.00586e-06	-0.7016	-7.13277e-07	-0.7016	-1.67023e-07
-0.69916	-1.00006e-06	-0.69916	-7.08791e-07	-0.69916	-1.62201e-07
-0.69672	-9.93042e-07	-0.69672	-7.07235e-07	-0.69672	-1.60614e-07
-0.69427	-9.85718e-07	-0.69427	-7.04702e-07	-0.69427	-1.54114e-07
-0.69183	-9.78394e-07	-0.69183	-7.01864e-07	-0.69183	-1.5094e-07
-0.68939	-9.69849e-07	-0.68939	-6.993e-07	-0.68939	-1.45935e-07
-0.68695	-9.6283e-07	-0.68695	-6.95608e-07	-0.68695	-1.41968e-07
-0.68451	-9.55811e-07	-0.68451	-6.94814e-07	-0.68451	-1.36902e-07
-0.68207	-9.49097e-07	-0.68207	-6.90725e-07	-0.68207	-1.34918e-07
-0.67963	-9.43298e-07	-0.67963	-6.88497e-07	-0.67963	-1.3089e-07
-0.67719	-9.36279e-07	-0.67719	-6.83981e-07	-0.67719	-1.26892e-07
-0.67474	-9.2926e-07	-0.67474	-6.81417e-07	-0.67474	-1.23932e-07
-0.6723	-9.21021e-07	-0.6723	-6.79403e-07	-0.6723	-1.21307e-07
-0.66986	-9.14612e-07	-0.66986	-6.76504e-07	-0.66986	-1.17737e-07
-0.66742	-9.08203e-07	-0.66742	-6.73574e-07	-0.66742	-1.15143e-07
-0.66498	-9.02405e-07	-0.66498	-6.70126e-07	-0.66498	-1.12457e-07
-0.66254	-8.9386e-07	-0.66254	-6.67226e-07	-0.66254	-1.0907e-07
-0.6601	-8.88977e-07	-0.6601	-6.64114e-07	-0.6601	-1.05835e-07
-0.65765	-8.81958e-07	-0.65765	-6.61092e-07	-0.65765	-1.01471e-07
-0.65521	-8.75244e-07	-0.65521	-6.58041e-07	-0.65521	-1.00525e-07
-0.65277	-8.67615e-07	-0.65277	-6.54745e-07	-0.65277	-9.63135e-08
-0.65033	-8.61206e-07	-0.65033	-6.51235e-07	-0.65033	-9.32617e-08
-0.64789	-8.52966e-07	-0.64789	-6.46688e-07	-0.64789	-8.89893e-08
-0.64545	-8.46863e-07	-0.64545	-6.4501e-07	-0.64545	-8.74023e-08
-0.64301	-8.39844e-07	-0.64301	-6.41103e-07	-0.64301	-8.44421e-08
-0.64056	-8.35266e-07	-0.64056	-6.38357e-07	-0.64056	-8.30383e-08
-0.63812	-8.27942e-07	-0.63812	-6.34267e-07	-0.63812	-7.91931e-08
-0.63568	-8.20618e-07	-0.63568	-6.31277e-07	-0.63568	-7.63855e-08
-0.63324	-8.12988e-07	-0.63324	-6.28103e-07	-0.63324	-7.34558e-08
-0.6308	-8.06885e-07	-0.6308	-6.25661e-07	-0.6308	-7.34253e-08
-0.62836	-7.99866e-07	-0.62836	-6.21908e-07	-0.62836	-6.90918e-08
-0.62592	-7.93152e-07	-0.62592	-6.18307e-07	-0.62592	-6.70471e-08
-0.62347	-7.86743e-07	-0.62347	-6.14767e-07	-0.62347	-6.49414e-08
-0.62103	-7.79419e-07	-0.62103	-6.11105e-07	-0.62103	-6.26831e-08
-0.61859	-7.73621e-07	-0.61859	-6.09457e-07	-0.61859	-5.85022e-08
-0.61615	-7.65991e-07	-0.61615	-6.05825e-07	-0.61615	-5.63049e-08
-0.61371	-7.58667e-07	-0.61371	-6.02224e-07	-0.61371	-5.3894e-08
-0.61127	-7.53479e-07	-0.61127	-5.98806e-07	-0.61127	-5.26123e-08
-0.60883	-7.4585e-07	-0.60883	-5.96609e-07	-0.60883	-4.98352e-08
-0.60638	-7.39441e-07	-0.60638	-5.93099e-07	-0.60638	-4.72717e-08
-0.60394	-7.31506e-07	-0.60394	-5.8959e-07	-0.60394	-4.44641e-08
-0.6015	-7.25403e-07	-0.6015	-5.87148e-07	-0.6015	-4.24194e-08
-0.59906	-7.18689e-07	-0.59906	-5.8312e-07	-0.59906	-4.21143e-08
-0.59662	-7.11975e-07	-0.59662	-5.79855e-07	-0.59662	-3.83301e-08
-0.59418	-7.05872e-07	-0.59418	-5.7604e-07	-0.59418	-3.6377e-08
-0.59174	-6.97632e-07	-0.59174	-5.73446e-07	-0.59174	-3.51257e-08
-0.58929	-6.91833e-07	-0.58929	-5.71127e-07	-0.58929	-3.32031e-08
-0.58685	-6.8573e-07	-0.58685	-5.66915e-07	-0.58685	-3.07007e-08
-0.58441	-6.80847e-07	-0.58441	-5.66549e-07	-0.58441	-2.85645e-08
-0.58197	-6.74438e-07	-0.58197	-5.62154e-07	-0.58197	-2.70386e-08
-0.57953	-6.67419e-07	-0.57953	-5.57821e-07	-0.57953	-2.52075e-08
-0.57709	-6.61316e-07	-0.57709	-5.54464e-07	-0.57709	-2.33765e-08
-0.57465	-6.53992e-07	-0.57465	-5.52206e-07	-0.57465	-2.28882e-08
-0.5722	-6.47888e-07	-0.5722	-5.48879e-07	-0.5722	-2.05688e-08
-0.56976	-6.4209e-07	-0.56976	-5.45858e-07	-0.56976	-1.70898e-08
-0.56732	-6.35681e-07	-0.56732	-5.42806e-07	-0.56732	-1.65405e-08
-0.56488	-6.28357e-07	-0.56488	-5.39022e-07	-0.56488	-1.43433e-08
-0.56244	-6.22864e-07	-0.56244	-5.36916e-07	-0.56244	-1.20544e-08
-0.56	-6.17676e-07	-0.56	-5.34933e-07	-0.56	-1.24817e-08
-0.55756	-6.10657e-07	-0.55756	-5.31179e-07	-0.55756	-8.81958e-09
-0.55511	-6.03943e-07	-0.55511	-5.28829e-07	-0.55511	-7.65991e-09
-0.55267	-5.96619e-07	-0.55267	-5.27273e-07	-0.55267	-6.57349e-09
-0.55023	-5.896e-07	-0.55023	-5.2416e-07	-0.55023	-4.45557e-09
-0.54779	-5.83801e-07	-0.54779	-5.21627e-07	-0.54779	-3.90625e-09
-0.54535	-5.78308e-07	-0.54535	-5.18545e-07	-0.54535	-5.15747e-10
-0.54291	-5.70984e-07	-0.54291	-5.14608e-07	-0.54291	1.27258e-09
-0.54047	-5.63965e-07	-0.54047	-5.12441e-07	-0.54047	2.09961e-09
-0.53802	-5.57251e-07	-0.53802	-5.10458e-07	-0.53802	5.70679e-09
-0.53558	-5.49622e-07	-0.53558	-5.07101e-07	-0.53558	6.10352e-09
-0.53314	-5.45654e-07	-0.53314	-5.0472e-07	-0.53314	7.62939e-09
-0.5307	-5.37415e-07	-0.5307	-5.02737e-07	-0.5307	9.49097e-09
-0.52826	-5.31311e-07	-0.52826	-4.9941e-07	-0.52826	1.15051e-08
-0.52582	-5.24597e-07	-0.52582	-4.97182e-07	-0.52582	1.39618e-08
-0.52338	-5.19409e-07	-0.52338	-4.95138e-07	-0.52338	1.4801e-08
-0.52094	-5.12085e-07	-0.52094	-4.91323e-07	-0.52094	1.58997e-08
-0.51849	-5.05371e-07	-0.51849	-4.8821e-07	-0.51849	1.91956e-08
-0.51605	-4.99268e-07	-0.51605	-4.87936e-07	-0.51605	1.95618e-08
-0.51361	-4.93164e-07	-0.51361	-4.83816e-07	-0.51361	2.09961e-08
-0.51117	-4.86145e-07	-0.51117	-4.82809e-07	-0.51117	2.28271e-08
-0.50873	-4.80042e-07	-0.50873	-4.80489e-07	-0.50873	2.49939e-08
-0.50629	-4.71802e-07	-0.50629	-4.78292e-07	-0.50629	2.75269e-08
-0.50385	-4.65912e-07	-0.50385	-4.76522e-07	-0.50385	2.89001e-08
-0.5014	-4.58221e-07	-0.5014	-4.73531e-07	-0.5014	3.09753e-08
-0.49896	-4.51813e-07	-0.49896	-4.70663e-07	-0.49896	3.32947e-08
-0.49652	-4.45587e-07	-0.49652	-4.68587e-07	-0.49652	3.51563e-08
-0.49408	-4.39392e-07	-0.49408	-4.66848e-07	-0.49408	3.56445e-08
-0.49164	-4.32098e-07	-0.49164	-4.6581e-07	-0.49164	3.93066e-08
-0.4892	-4.27399e-07	-0.4892	-4.62789e-07	-0.4892	3.95508e-08
-0.48676	-4.19464e-07	-0.48676	-4.6108e-07	-0.48676	4.2511e-08
-0.48431	-4.12384e-07	-0.48431	-4.57937e-07	-0.48431	4.26025e-08
-0.48187	-4.05945e-07	-0.48187	-4.56777e-07	-0.48187	4.53796e-08
-0.47943	-3.97827e-07	-0.47943	-4.52352e-07	-0.47943	4.61121e-08
-0.47699	-3.92761e-07	-0.47699	-4.50277e-07	-0.47699	4.7821e-08
-0.47455	-3.85498e-07	-0.47455	-4.47256e-07	-0.47455	4.96216e-08
-0.47211	-3.78906e-07	-0.47211	-4.44997e-07	-0.47211	5.24597e-08
-0.46967	-3.72467e-07	-0.46967	-4.4161e-07	-0.46967	5.27954e-08
-0.46722	-3.66028e-07	-0.46722	-4.38863e-07	-0.46722	5.58167e-08
-0.46478	-3.60535e-07	-0.46478	-4.36819e-07	-0.46478	5.72205e-08
-0.46234	-3.53668e-07	-0.46234	-4.34011e-07	-0.46234	5.84412e-08
-0.4599	-3.46588e-07	-0.4599	-4.30776e-07	-0.4599	5.98145e-08
-0.45746	-3.40851e-07	-0.45746	-4.28518e-07	-0.45746	6.26526e-08
-0.45502	-3.34869e-07	-0.45502	-4.25558e-07	-0.45502	6.38733e-08
-0.45258	-3.27972e-07	-0.45258	-4.23544e-07	-0.45258	6.59485e-08
-0.45013	-3.20679e-07	-0.45013	-4.19118e-07	-0.45013	6.67114e-08
-0.44769	-3.13843e-07	-0.44769	-4.17654e-07	-0.44769	6.91528e-08
-0.44525	-3.07281e-07	-0.44525	-4.14907e-07	-0.44525	6.99158e-08
-0.44281	-3.00873e-07	-0.44281	-4.11794e-07	-0.44281	7.26318e-08
-0.44037	-2.95258e-07	-0.44037	-4.09627e-07	-0.44037	7.32727e-08
-0.43793	-2.89124e-07	-0.43793	-4.06515e-07	-0.43793	7.56531e-08
-0.43549	-2.83844e-07	-0.43549	-4.04226e-07	-0.43549	7.69958e-08
-0.43304	-2.75574e-07	-0.43304	-4.02029e-07	-0.43304	7.87964e-08
-0.4306	-2.7005e-07	-0.4306	-3.98519e-07	-0.4306	7.88269e-08
-0.42816	-2.62909e-07	-0.42816	-3.95773e-07	-0.42816	8.17261e-08
-0.42572	-2.57385e-07	-0.42572	-3.91866e-07	-0.42572	8.37402e-08
-0.42328	-2.51923e-07	-0.42328	-3.90768e-07	-0.42328	8.46252e-08
-0.42084	-2.45911e-07	-0.42084	-3.87838e-07	-0.42084	8.63037e-08
-0.4184	-2.39105e-07	-0.4184	-3.8677e-07	-0.4184	8.89587e-08
-0.41595	-2.33887e-07	-0.41595	-3.83657e-07	-0.41595	8.92334e-08
-0.41351	-2.26044e-07	-0.41351	-3.79995e-07	-0.41351	9.13391e-08
-0.41107	-2.2113e-07	-0.41107	-3.77096e-07	-0.41107	9.32617e-08
-0.40863	-2.16309e-07	-0.40863	-3.74532e-07	-0.40863	9.43604e-08
-0.40619	-2.09961e-07	-0.40619	-3.7261e-07	-0.40619	9.66797e-08
-0.40375	-2.04498e-07	-0.40375	-3.69436e-07	-0.40375	9.63135e-08
-0.40131	-1.99341e-07	-0.40131	-3.66231e-07	-0.40131	9.85413e-08
-0.39886	-1.92017e-07	-0.39886	-3.6437e-07	-0.39886	9.9823e-08
-0.39642	-1.86584e-07	-0.39642	-3.60555e-07	-0.39642	1.01837e-07
-0.39398	-1.79413e-07	-0.39398	-3.58877e-07	-0.39398	1.03485e-07
-0.39154	-1.74316e-07	-0.39154	-3.55947e-07	-0.39154	1.06049e-07
-0.3891	-1.69586e-07	-0.3891	-3.53811e-07	-0.3891	1.06628e-07
-0.38666	-1.6452e-07	-0.38666	-3.51064e-07	-0.38666	1.0791e-07
-0.38422	-1.5741e-07	-0.38422	-3.48135e-07	-0.38422	1.1026e-07
-0.38177	-1.52771e-07	-0.38177	-3.47829e-07	-0.38177	1.12e-07
-0.37933	-1.47217e-07	-0.37933	-3.44106e-07	-0.37933	1.13647e-07
-0.37689	-1.43463e-07	-0.37689	-3.40688e-07	-0.37689	1.14319e-07
-0.37445	-1.37329e-07	-0.37445	-3.40108e-07	-0.37445	1.16486e-07
-0.37201	-1.33087e-07	-0.37201	-3.37026e-07	-0.37201	1.16486e-07
-0.36957	-1.26312e-07	-0.36957	-3.35348e-07	-0.36957	1.18774e-07
-0.36713	-1.21552e-07	-0.36713	-3.32876e-07	-0.36713	1.20544e-07
-0.36469	-1.17737e-07	-0.36469	-3.31014e-07	-0.36469	1.21613e-07
-0.36224	-1.11084e-07	-0.36224	-3.29183e-07	-0.36224	1.24115e-07
-0.3598	-1.05927e-07	-0.3598	-3.28237e-07	-0.3598	1.25519e-07
-0.35736	-1.01074e-07	-0.35736	-3.24483e-07	-0.35736	1.27167e-07
-0.35492	-9.67407e-08	-0.35492	-3.22927e-07	-0.35492	1.27899e-07
-0.35248	-9.30786e-08	-0.35248	-3.21065e-07	-0.35248	1.27991e-07
-0.35004	-8.73718e-08	-0.35004	-3.20455e-07	-0.35004	1.30096e-07
-0.3476	-8.32214e-08	-0.3476	-3.17434e-07	-0.3476	1.32446e-07
-0.34515	-7.82471e-08	-0.34515	-3.15633e-07	-0.34515	1.33698e-07
-0.34271	-7.4646e-08	-0.34271	-3.13711e-07	-0.34271	1.36383e-07
-0.34027	-6.93359e-08	-0.34027	-3.10506e-07	-0.34027	1.36292e-07
-0.33783	-6.66199e-08	-0.33783	-3.08034e-07	-0.33783	1.37817e-07
-0.33539	-6.14624e-08	-0.33539	-3.06448e-07	-0.33539	1.39282e-07
-0.33295	-5.82581e-08	-0.33295	-3.06448e-07	-0.33295	1.41296e-07
-0.33051	-5.22461e-08	-0.33051	-3.02938e-07	-0.33051	1.42029e-07
-0.32806	-4.98657e-08	-0.32806	-3.01748e-07	-0.32806	1.44257e-07
-0.32562	-4.55933e-08	-0.32562	-2.99337e-07	-0.32562	1.45142e-07
-0.32318	-4.14734e-08	-0.32318	-2.9717e-07	-0.32318	1.4679e-07
-0.32074	-3.84827e-08	-0.32074	-2.94179e-07	-0.32074	1.48346e-07
-0.3183	-3.19519e-08	-0.3183	-2.91585e-07	-0.3183	1.47919e-07
-0.31586	-2.83813e-08	-0.31586	-2.88839e-07	-0.31586	1.5213e-07
-0.31342	-2.56042e-08	-0.31342	-2.88338e-07	-0.31342	1.51581e-07
-0.31097	-2.20642e-08	-0.31097	-2.85726e-07	-0.31097	1.52344e-07
-0.30853	-1.89209e-08	-0.30853	-2.82458e-07	-0.30853	1.53778e-07
-0.30609	-1.55334e-08	-0.30609	-2.80782e-07	-0.30609	1.56067e-07
-0.30365	-1.2207e-08	-0.30365	-2.79067e-07	-0.30365	1.5744e-07
-0.30121	-7.8125e-09	-0.30121	-2.76693e-07	-0.30121	1.58783e-07
-0.29877	-5.79834e-09	-0.29877	-2.74862e-07	-0.29877	1.6098e-07
-0.29633	-1.61743e-09	-0.29633	-2.7297e-07	-0.29633	1.61469e-07
-0.29388	1.46484e-09	-0.29388	-2.70965e-07	-0.29388	1.63452e-07
-0.29144	5.76172e-09	-0.29144	-2.68386e-07	-0.29144	1.64948e-07
-0.289	7.84302e-09	-0.289	-2.66146e-07	-0.289	1.64703e-07
-0.28656	1.08643e-08	-0.28656	-2.63122e-07	-0.28656	1.67847e-07
-0.28412	1.40076e-08	-0.28412	-2.61404e-07	-0.28412	1.6806e-07
-0.28168	1.72729e-08	-0.28168	-2.58413e-07	-0.28168	1.69037e-07
-0.27924	1.95313e-08	-0.27924	-2.5646e-07	-0.27924	1.71082e-07
-0.27679	2.28577e-08	-0.27679	-2.53377e-07	-0.27679	1.72241e-07
-0.27435	2.5116e-08	-0.27435	-2.52401e-07	-0.27435	1.74225e-07
-0.27191	2.6947e-08	-0.27191	-2.48403e-07	-0.27191	1.75537e-07
-0.26947	2.98767e-08	-0.26947	-2.4764e-07	-0.26947	1.77155e-07
-0.26703	3.2074e-08	-0.26703	-2.45046e-07	-0.26703	1.78009e-07
-0.26459	3.6377e-08	-0.26459	-2.41384e-07	-0.26459	1.79688e-07
-0.26215	3.87878e-08	-0.26215	-2.39034e-07	-0.26215	1.80603e-07
-0.2597	4.09851e-08	-0.2597	-2.37752e-07	-0.2597	1.83105e-07
-0.25726	4.37317e-08	-0.25726	-2.34975e-07	-0.25726	1.84448e-07
-0.25482	4.5166e-08	-0.25482	-2.33572e-07	-0.25482	1.85547e-07
-0.25238	4.84924e-08	-0.25238	-2.29269e-07	-0.25238	1.8576e-07
-0.24994	5.08423e-08	-0.24994	-2.27193e-07	-0.24994	1.87042e-07
-0.2475	5.23987e-08	-0.2475	-2.24142e-07	-0.2475	1.87775e-07
-0.24506	5.39551e-08	-0.24506	-2.22646e-07	-0.24506	1.89514e-07
-0.24261	5.74951e-08	-0.24261	-2.21761e-07	-0.24261	1.92291e-07
-0.24017	5.96619e-08	-0.24017	-2.18679e-07	-0.24017	1.94061e-07
-0.23773	6.13708e-08	-0.23773	-2.14376e-07	-0.23773	1.95313e-07
-0.23529	6.34766e-08	-0.23529	-2.12148e-07	-0.23529	1.95709e-07
-0.23285	6.56738e-08	-0.23285	-2.10104e-07	-0.23285	1.97052e-07
-0.23041	6.78711e-08	-0.23041	-2.07082e-07	-0.23041	1.96869e-07
-0.22797	6.91528e-08	-0.22797	-2.05556e-07	-0.22797	1.99829e-07
-0.22552	7.00684e-08	-0.22552	-2.03329e-07	-0.22552	2.02423e-07
-0.22308	7.30896e-08	-0.22308	-2.00887e-07	-0.22308	2.02576e-07
-0.22064	7.35779e-08	-0.22064	-1.97256e-07	-0.22064	2.03522e-07
-0.2182	7.48901e-08	-0.2182	-1.95913e-07	-0.2182	2.04376e-07
-0.21576	7.88269e-08	-0.21576	-1.94997e-07	-0.21576	2.07611e-07
-0.21332	7.97424e-08	-0.21332	-1.91976e-07	-0.21332	2.09167e-07
-0.21088	8.078e-08	-0.21088	-1.90603e-07	-0.21088	2.10083e-07
-0.20844	8.28857e-08	-0.20844	-1.86666e-07	-0.20844	2.10754e-07
-0.20599	8.5144e-08	-0.20599	-1.85262e-07	-0.20599	2.12097e-07
-0.20355	8.70667e-08	-0.20355	-1.81875e-07	-0.20355	2.13379e-07
-0.20111	8.92944e-08	-0.20111	-1.79067e-07	-0.20111	2.14783e-07
-0.19867	8.99353e-08	-0.19867	-1.77419e-07	-0.19867	2.14874e-07
-0.19623	9.20715e-08	-0.19623	-1.75558e-07	-0.19623	2.17163e-07
-0.19379	9.32312e-08	-0.19379	-1.72597e-07	-0.19379	2.17743e-07
-0.19135	9.45129e-08	-0.19135	-1.71529e-07	-0.19135	2.20337e-07
-0.1889	9.48181e-08	-0.1889	-1.68386e-07	-0.1889	2.21283e-07
-0.18646	9.67102e-08	-0.18646	-1.66372e-07	-0.18646	2.2168e-07
-0.18402	9.89685e-08	-0.18402	-1.62252e-07	-0.18402	2.23053e-07
-0.18158	9.92126e-08	-0.18158	-1.60757e-07	-0.18158	2.24335e-07
-0.17914	1.01807e-07	-0.17914	-1.58804e-07	-0.17914	2.26654e-07
-0.1767	1.03607e-07	-0.1767	-1.5563e-07	-0.1767	2.26898e-07
-0.17426	1.05438e-07	-0.17426	-1.53616e-07	-0.17426	2.28027e-07
-0.17181	1.06598e-07	-0.17181	-1.49709e-07	-0.17181	2.29462e-07
-0.16937	1.06995e-07	-0.16937	-1.4858e-07	-0.16937	2.3114e-07
-0.16693	1.09283e-07	-0.16693	-1.47115e-07	-0.16693	2.32269e-07
-0.16449	1.10657e-07	-0.16449	-1.42843e-07	-0.16449	2.33704e-07
-0.16205	1.1264e-07	-0.16205	-1.41103e-07	-0.16205	2.35077e-07
-0.15961	1.12762e-07	-0.15961	-1.36556e-07	-0.15961	2.36542e-07
-0.15717	1.12244e-07	-0.15717	-1.36098e-07	-0.15717	2.37549e-07
-0.15472	1.14563e-07	-0.15472	-1.34206e-07	-0.15472	2.38098e-07
-0.15228	1.16516e-07	-0.15228	-1.32375e-07	-0.15228	2.40753e-07
-0.14984	1.18134e-07	-0.14984	-1.29079e-07	-0.14984	2.41791e-07
-0.1474	1.20117e-07	-0.1474	-1.25417e-07	-0.1474	2.42859e-07
-0.14496	1.21918e-07	-0.14496	-1.23983e-07	-0.14496	2.44263e-07
-0.14252	1.23627e-07	-0.14252	-1.20077e-07	-0.14252	2.44293e-07
-0.14008	1.2439e-07	-0.14008	-1.18887e-07	-0.14008	2.47253e-07
-0.13763	1.25244e-07	-0.13763	-1.17147e-07	-0.13763	2.48077e-07
-0.13519	1.25641e-07	-0.13519	-1.14004e-07	-0.13519	2.48871e-07
-0.13275	1.27716e-07	-0.13275	-1.11623e-07	-0.13275	2.50458e-07
-0.13031	1.29303e-07	-0.13031	-1.09273e-07	-0.13031	2.51404e-07
-0.12787	1.3031e-07	-0.12787	-1.06954e-07	-0.12787	2.53662e-07
-0.12543	1.31592e-07	-0.12543	-1.0375e-07	-0.12543	2.54517e-07
-0.12299	1.32141e-07	-0.12299	-1.01919e-07	-0.12299	2.55493e-07
-0.12054	1.33942e-07	-0.12054	-1.00454e-07	-0.12054	2.57751e-07
-0.1181	1.34735e-07	-0.1181	-9.68528e-08	-0.1181	2.57446e-07
-0.11566	1.37177e-07	-0.11566	-9.49302e-08	-0.11566	2.58698e-07
-0.11322	1.39313e-07	-0.11322	-9.27635e-08	-0.11322	2.61047e-07
-0.11078	1.40015e-07	-0.11078	-9.11155e-08	-0.11078	2.60773e-07
-0.10834	1.40564e-07	-0.10834	-8.68736e-08	-0.10834	2.63733e-07
-0.1059	1.40808e-07	-0.1059	-8.46763e-08	-0.1059	2.63031e-07
-0.10345	1.41083e-07	-0.10345	-8.17161e-08	-0.10345	2.65564e-07
-0.10101	1.4209e-07	-0.10101	-7.93968e-08	-0.10101	2.65839e-07
-0.09857	1.42609e-07	-0.09857	-7.61009e-08	-0.09857	2.68585e-07
-0.09613	1.44318e-07	-0.09613	-7.39341e-08	-0.09613	2.70111e-07
-0.09369	1.44165e-07	-0.09369	-7.06688e-08	-0.09369	2.70508e-07
-0.09125	1.4447e-07	-0.09125	-6.92344e-08	-0.09125	2.72675e-07
-0.08881	1.45935e-07	-0.08881	-6.7556e-08	-0.08881	2.73315e-07
-0.08636	1.48041e-07	-0.08636	-6.22459e-08	-0.08636	2.75604e-07
-0.08392	1.47614e-07	-0.08392	-6.00792e-08	-0.08392	2.74231e-07
-0.08148	1.49353e-07	-0.08148	-5.76988e-08	-0.08148	2.76672e-07
-0.07904	1.49994e-07	-0.07904	-5.70274e-08	-0.07904	2.77985e-07
-0.0766	1.51825e-07	-0.0766	-5.38841e-08	-0.0766	2.79907e-07
-0.07416	1.52466e-07	-0.07416	-5.18394e-08	-0.07416	2.8006e-07
-0.07172	1.53961e-07	-0.07172	-4.78721e-08	-0.07172	2.81586e-07
-0.06927	1.54816e-07	-0.06927	-4.51866e-08	-0.06927	2.82776e-07
-0.06683	1.56219e-07	-0.06683	-4.25315e-08	-0.06683	2.84851e-07
-0.06439	1.58325e-07	-0.06439	-4.13719e-08	-0.06439	2.86591e-07
-0.06195	1.60065e-07	-0.06195	-3.80455e-08	-0.06195	2.87933e-07
-0.05951	1.6156e-07	-0.05951	-3.55735e-08	-0.05951	2.88177e-07
-0.05707	1.61469e-07	-0.05707	-3.35594e-08	-0.05707	2.89642e-07
-0.05463	1.63391e-07	-0.05463	-2.99278e-08	-0.05463	2.90771e-07
-0.05219	1.64398e-07	-0.05219	-2.77305e-08	-0.05219	2.91779e-07
-0.04974	1.65833e-07	-0.04974	-2.53807e-08	-0.04974	2.93121e-07
-0.0473	1.67389e-07	-0.0473	-2.21458e-08	-0.0473	2.95746e-07
-0.04486	1.66931e-07	-0.04486	-1.95823e-08	-0.04486	2.95135e-07
-0.04242	1.6925e-07	-0.04242	-1.66832e-08	-0.04242	2.97241e-07
-0.03998	1.69891e-07	-0.03998	-1.43943e-08	-0.03998	2.97943e-07
-0.03754	1.70258e-07	-0.03754	-1.04576e-08	-0.03754	2.99561e-07
-0.0351	1.72241e-07	-0.0351	-8.7791e-09	-0.0351	3.00629e-07
-0.03265	1.73401e-07	-0.03265	-8.10772e-09	-0.03265	3.01788e-07
-0.03021	1.74072e-07	-0.03021	-3.31646e-09	-0.03021	3.03772e-07
-0.02777	1.75323e-07	-0.02777	-2.37041e-09	-0.02777	3.0423e-07
-0.02533	1.77399e-07	-0.02533	-1.73145e-10	-0.02533	3.04901e-07
-0.02289	1.79138e-07	-0.02289	5.01484e-09	-0.02289	3.06183e-07
-0.02045	1.79199e-07	-0.02045	7.15107e-09	-0.02045	3.07709e-07
-0.01801	1.79016e-07	-0.01801	8.46333e-09	-0.01801	3.09967e-07
-0.01556	1.8045e-07	-0.01556	1.20339e-08	-0.01556	3.11035e-07
-0.01312	1.80878e-07	-0.01312	1.38649e-08	-0.01312	3.10211e-07
-0.01068	1.83411e-07	-0.01068	1.58791e-08	-0.01068	3.14728e-07
-0.00824	1.84479e-07	-0.00824	2.06093e-08	-0.00824	3.14575e-07
-0.0058	1.85303e-07	-0.0058	2.12197e-08	-0.0058	3.14941e-07
-0.00336	1.86371e-07	-0.00336	2.31423e-08	-0.00336	3.172e-07
-0.000915527	1.84784e-07	-0.000915527	2.64382e-08	-0.000915527	3.17566e-07
0.00153	1.87073e-07	0.00153	2.97036e-08	0.00153	3.20038e-07
0.00397	1.87073e-07	0.00397	3.2145e-08	0.00397	3.20129e-07
0.00641	1.86279e-07	0.00641	3.39455e-08	0.00641	3.21014e-07
0.00885	1.88538e-07	0.00885	3.62038e-08	0.00885	3.23181e-07
0.01129	1.88599e-07	0.01129	3.96523e-08	0.01129	3.2486e-07
0.01373	1.9043e-07	0.01373	4.33754e-08	0.01373	3.24493e-07
0.01617	1.92841e-07	0.01617	4.36196e-08	0.01617	3.27728e-07
0.01862	1.94397e-07	0.01862	4.79836e-08	0.01862	3.28064e-07
0.02106	1.9751e-07	0.02106	4.90212e-08	0.02106	3.29346e-07
0.0235	2.005e-07	0.0235	5.14016e-08	0.0235	3.30292e-07
0.02594	2.01874e-07	0.02594	5.5613e-08	0.02594	3.31482e-07
0.02838	2.02881e-07	0.02838	5.80849e-08	0.02838	3.31879e-07
0.03082	2.04651e-07	0.03082	6.03127e-08	0.03082	3.33984e-07
0.03326	2.0755e-07	0.03326	6.18386e-08	0.03326	3.35327e-07
0.03571	2.08618e-07	0.03571	6.65688e-08	0.03571	3.37219e-07
0.03815	2.08923e-07	0.03815	6.82473e-08	0.03815	3.37921e-07
0.04059	2.11456e-07	0.04059	6.97121e-08	0.04059	3.38318e-07
0.04303	2.11273e-07	0.04303	7.28249e-08	0.04303	3.40515e-07
0.04547	2.12463e-07	0.04547	7.53273e-08	0.04547	3.41492e-07
0.04791	2.14294e-07	0.04791	7.77687e-08	0.04791	3.42316e-07
0.05035	2.16919e-07	0.05035	8.02102e-08	0.05035	3.44452e-07
0.0528	2.17712e-07	0.0528	8.22548e-08	0.0528	3.45673e-07
0.05524	2.19482e-07	0.05524	8.61e-08	0.05524	3.45428e-07
0.05768	2.20459e-07	0.05768	8.77175e-08	0.05768	3.47229e-07
0.06012	2.21436e-07	0.06012	9.04335e-08	0.06012	3.4848e-07
0.06256	2.23083e-07	0.06256	9.37905e-08	0.06256	3.49945e-07
0.065	2.25098e-07	0.065	9.62929e-08	0.065	3.51349e-07
0.06744	2.26837e-07	0.06744	1.0084e-07	0.06744	3.52448e-07
0.06989	2.29004e-07	0.06989	1.01878e-07	0.06989	3.54401e-07
0.07233	2.29828e-07	0.07233	1.04075e-07	0.07233	3.54614e-07
0.07477	2.33002e-07	0.07477	1.07157e-07	0.07477	3.5614e-07
0.07721	2.34192e-07	0.07721	1.0911e-07	0.07721	3.57971e-07
0.07965	2.35138e-07	0.07965	1.12406e-07	0.07965	3.59222e-07
0.08209	2.37091e-07	0.08209	1.14634e-07	0.08209	3.60291e-07
0.08453	2.39288e-07	0.08453	1.16618e-07	0.08453	3.61603e-07
0.08698	2.39655e-07	0.08698	1.19608e-07	0.08698	3.63678e-07
0.08942	2.42371e-07	0.08942	1.23179e-07	0.08942	3.63647e-07
0.09186	2.44232e-07	0.09186	1.27146e-07	0.09186	3.64441e-07
0.0943	2.45239e-07	0.0943	1.29008e-07	0.0943	3.66699e-07
0.09674	2.45117e-07	0.09674	1.31602e-07	0.09674	3.69476e-07
0.09918	2.46185e-07	0.09918	1.34257e-07	0.09918	3.68256e-07
0.10162	2.47253e-07	0.10162	1.37309e-07	0.10162	3.70209e-07
0.10406	2.48779e-07	0.10406	1.39658e-07	0.10406	3.72681e-07
0.10651	2.50946e-07	0.10651	1.4329e-07	0.10651	3.7381e-07
0.10895	2.51648e-07	0.10895	1.45762e-07	0.10895	3.75397e-07
0.11139	2.53632e-07	0.11139	1.48356e-07	0.11139	3.76862e-07
0.11383	2.56226e-07	0.11383	1.5214e-07	0.11383	3.78235e-07
0.11627	2.58759e-07	0.11627	1.54124e-07	0.11627	3.77899e-07
0.11871	2.60529e-07	0.11871	1.57481e-07	0.11871	3.80554e-07
0.12115	2.63275e-07	0.12115	1.60288e-07	0.12115	3.81165e-07
0.1236	2.64526e-07	0.1236	1.63432e-07	0.1236	3.82294e-07
0.12604	2.66907e-07	0.12604	1.66087e-07	0.12604	3.83667e-07
0.12848	2.69318e-07	0.12848	1.70634e-07	0.12848	3.85864e-07
0.13092	2.72095e-07	0.13092	1.72129e-07	0.13092	3.87604e-07
0.13336	2.73956e-07	0.13336	1.76127e-07	0.13336	3.88702e-07
0.1358	2.7774e-07	0.1358	1.77775e-07	0.1358	3.89343e-07
0.13824	2.80609e-07	0.13824	1.82078e-07	0.13824	3.90259e-07
0.14069	2.82318e-07	0.14069	1.84855e-07	0.14069	3.91144e-07
0.14313	2.85278e-07	0.14313	1.87632e-07	0.14313	3.93372e-07
0.14557	2.8714e-07	0.14557	1.90897e-07	0.14557	3.94775e-07
0.14801	2.89032e-07	0.14801	1.95689e-07	0.14801	3.96454e-07
0.15045	2.91382e-07	0.15045	1.97031e-07	0.15045	3.9798e-07
0.15289	2.93884e-07	0.15289	2.01884e-07	0.15289	3.99078e-07
0.15533	2.95959e-07	0.15533	2.04081e-07	0.15533	3.99811e-07
0.15778	2.99988e-07	0.15778	2.07377e-07	0.15778	4.01398e-07
0.16022	3.02338e-07	0.16022	2.10886e-07	0.16022	4.04175e-07
0.16266	3.05115e-07	0.16266	2.13877e-07	0.16266	4.04663e-07
0.1651	3.08411e-07	0.1651	2.16898e-07	0.1651	4.06219e-07
0.16754	3.11554e-07	0.16754	2.20469e-07	0.16754	4.06799e-07
0.16998	3.13263e-07	0.16998	2.23887e-07	0.16998	4.08569e-07
0.17242	3.17444e-07	0.17242	2.27732e-07	0.17242	4.09454e-07
0.17487	3.21014e-07	0.17487	2.32371e-07	0.17487	4.11926e-07
0.17731	3.24432e-07	0.17731	2.36124e-07	0.17731	4.13147e-07
0.17975	3.27423e-07	0.17975	2.3881e-07	0.17975	4.1449e-07
0.18219	3.31055e-07	0.18219	2.42442e-07	0.18219	4.15466e-07
0.18463	3.33435e-07	0.18463	2.47233e-07	0.18463	4.1687e-07
0.18707	3.36517e-07	0.18707	2.50681e-07	0.18707	4.18762e-07
0.18951	3.37738e-07	0.18951	2.53489e-07	0.18951	4.19586e-07
0.19196	3.43292e-07	0.19196	2.56358e-07	0.19196	4.22455e-07
0.1944	3.45276e-07	0.1944	2.6121e-07	0.1944	4.22882e-07
0.19684	3.49091e-07	0.19684	2.65604e-07	0.19684	4.25507e-07
0.19928	3.52081e-07	0.19928	2.68717e-07	0.19928	4.27612e-07
0.20172	3.56567e-07	0.20172	2.71342e-07	0.20172	4.2868e-07
0.20416	3.60229e-07	0.20416	2.7656e-07	0.20416	4.29291e-07
0.2066	3.64502e-07	0.2066	2.78849e-07	0.2066	4.31274e-07
0.20905	3.67371e-07	0.20905	2.83549e-07	0.20905	4.33014e-07
0.21149	3.71002e-07	0.21149	2.87302e-07	0.21149	4.34143e-07
0.21393	3.7323e-07	0.21393	2.92674e-07	0.21393	4.36157e-07
0.21637	3.7796e-07	0.21637	2.95237e-07	0.21637	4.38568e-07
0.21881	3.80615e-07	0.21881	2.98747e-07	0.21881	4.38873e-07
0.22125	3.85223e-07	0.22125	3.0427e-07	0.22125	4.4101e-07
0.22369	3.89252e-07	0.22369	3.08543e-07	0.22369	4.42932e-07
0.22614	3.93707e-07	0.22614	3.12357e-07	0.22614	4.45129e-07
0.22858	3.97552e-07	0.22858	3.15806e-07	0.22858	4.45221e-07
0.23102	4.01703e-07	0.23102	3.20078e-07	0.23102	4.48517e-07
0.23346	4.06891e-07	0.23346	3.24076e-07	0.23346	4.50256e-07
0.2359	4.10797e-07	0.2359	3.28928e-07	0.2359	4.51111e-07
0.23834	4.16107e-07	0.23834	3.30821e-07	0.23834	4.54407e-07
0.24078	4.20044e-07	0.24078	3.36314e-07	0.24078	4.56238e-07
0.24323	4.24438e-07	0.24323	3.40281e-07	0.24323	4.56635e-07
0.24567	4.29932e-07	0.24567	3.43638e-07	0.24567	4.57977e-07
0.24811	4.34845e-07	0.24811	3.4791e-07	0.24811	4.60266e-07
0.25055	4.40857e-07	0.25055	3.52793e-07	0.25055	4.6228e-07
0.25299	4.44763e-07	0.25299	3.57676e-07	0.25299	4.63745e-07
0.25543	4.50409e-07	0.25543	3.63169e-07	0.25543	4.65729e-07
0.25787	4.55872e-07	0.25787	3.67442e-07	0.25787	4.68048e-07
0.26031	4.61639e-07	0.26031	3.70799e-07	0.26031	4.70306e-07
0.26276	4.68018e-07	0.26276	3.74766e-07	0.26276	4.72748e-07
0.2652	4.73206e-07	0.2652	3.80259e-07	0.2652	4.74121e-07
0.26764	4.78363e-07	0.26764	3.84531e-07	0.26764	4.7583e-07
0.27008	4.84375e-07	0.27008	3.89719e-07	0.27008	4.77722e-07
0.27252	4.88068e-07	0.27252	3.94297e-07	0.27252	4.80225e-07
0.27496	4.95392e-07	0.27496	3.9857e-07	0.27496	4.82788e-07
0.2774	5.00458e-07	0.2774	4.03147e-07	0.2774	4.84528e-07
0.27985	5.04974e-07	0.27985	4.0803e-07	0.27985	4.86328e-07
0.28229	5.10193e-07	0.28229	4.13523e-07	0.28229	4.88464e-07
0.28473	5.1532e-07	0.28473	4.17796e-07	0.28473	4.91119e-07
0.28717	5.20416e-07	0.28717	4.23289e-07	0.28717	4.92706e-07
0.28961	5.25513e-07	0.28961	4.2512e-07	0.28961	4.94873e-07
0.29205	5.31586e-07	0.29205	4.31834e-07	0.29205	4.9585e-07
0.29449	5.39276e-07	0.29449	4.37022e-07	0.29449	4.99603e-07
0.29694	5.44647e-07	0.29694	4.40379e-07	0.29694	5.01892e-07
0.29938	5.50476e-07	0.29938	4.47092e-07	0.29938	5.02899e-07
0.30182	5.57007e-07	0.30182	4.50755e-07	0.30182	5.06775e-07
0.30426	5.63812e-07	0.30426	4.57468e-07	0.30426	5.07477e-07
0.3067	5.70618e-07	0.3067	4.6052e-07	0.3067	5.11261e-07
0.30914	5.76385e-07	0.30914	4.65403e-07	0.30914	5.13306e-07
0.31158	5.8252e-07	0.31158	4.71201e-07	0.31158	5.1416e-07
0.31403	5.90637e-07	0.31403	4.74863e-07	0.31403	5.16876e-07
0.31647	5.97656e-07	0.31647	4.80357e-07	0.31647	5.20721e-07
0.31891	6.04675e-07	0.31891	4.85239e-07	0.31891	5.22583e-07
0.32135	6.11877e-07	0.32135	4.88902e-07	0.32135	5.242e-07
0.32379	6.18286e-07	0.32379	4.95005e-07	0.32379	5.27252e-07
0.32623	6.25305e-07	0.32623	4.98362e-07	0.32623	5.28748e-07
0.32867	6.31714e-07	0.32867	5.04466e-07	0.32867	5.31799e-07
0.33112	6.38428e-07	0.33112	5.09348e-07	0.33112	5.34363e-07
0.33356	6.44226e-07	0.33356	5.13316e-07	0.33356	5.36133e-07
0.336	6.51855e-07	0.336	5.18504e-07	0.336	5.37903e-07
0.33844	6.5979e-07	0.33844	5.23692e-07	0.33844	5.41168e-07
0.34088	6.67725e-07	0.34088	5.28269e-07	0.34088	5.43701e-07
0.34332	6.76575e-07	0.34332	5.32847e-07	0.34332	5.46753e-07
0.34576	6.82983e-07	0.34576	5.37425e-07	0.34576	5.48553e-07
0.34821	6.91223e-07	0.34821	5.42002e-07	0.34821	5.51971e-07
0.35065	6.98242e-07	0.35065	5.45054e-07	0.35065	5.53711e-07
0.35309	7.05872e-07	0.35309	5.49632e-07	0.35309	5.56213e-07
0.35553	7.14111e-07	0.35553	5.54209e-07	0.35553	5.59479e-07
0.35797	7.2113e-07	0.35797	5.58482e-07	0.35797	5.62347e-07
0.36041	7.26318e-07	0.36041	5.6489e-07	0.36041	5.64911e-07
0.36285	7.32727e-07	0.36285	5.68552e-07	0.36285	5.65033e-07
0.3653	7.40662e-07	0.3653	5.72215e-07	0.3653	5.70557e-07
0.36774	7.48291e-07	0.36774	5.78013e-07	0.36774	5.71808e-07
0.37018	7.54089e-07	0.37018	5.8137e-07	0.37018	5.74066e-07
0.37262	7.6355e-07	0.37262	5.85337e-07	0.37262	5.76843e-07
0.37506	7.69958e-07	0.37506	5.89304e-07	0.37506	5.79376e-07
0.3775	7.79114e-07	0.3775	5.94187e-07	0.3775	5.82977e-07
0.37994	7.87354e-07	0.37994	5.98765e-07	0.37994	5.86121e-07
0.38239	7.98645e-07	0.38239	6.02122e-07	0.38239	5.90118e-07
0.38483	8.05359e-07	0.38483	6.06089e-07	0.38483	5.91827e-07
0.38727	8.15125e-07	0.38727	6.10667e-07	0.38727	5.94666e-07
0.38971	8.2489e-07	0.38971	6.14634e-07	0.38971	5.98419e-07
0.39215	8.35571e-07	0.39215	6.17686e-07	0.39215	6.00311e-07
0.39459	8.43506e-07	0.39459	6.21653e-07	0.39459	6.03027e-07
0.39703	8.52356e-07	0.39703	6.26841e-07	0.39703	6.05774e-07
0.39948	8.60901e-07	0.39948	6.30503e-07	0.39948	6.09436e-07
0.40192	8.68225e-07	0.40192	6.34776e-07	0.40192	6.11877e-07
0.40436	8.77686e-07	0.40436	6.38133e-07	0.40436	6.14319e-07
0.4068	8.88367e-07	0.4068	6.421e-07	0.4068	6.17065e-07
0.40924	8.95691e-07	0.40924	6.45152e-07	0.40924	6.20117e-07
0.41168	9.05457e-07	0.41168	6.5034e-07	0.41168	6.24084e-07
0.41412	9.14307e-07	0.41412	6.52476e-07	0.41412	6.26831e-07
0.41656	9.24683e-07	0.41656	6.58274e-07	0.41656	6.29578e-07
0.41901	9.34448e-07	0.41901	6.5919e-07	0.41901	6.32935e-07
0.42145	9.43909e-07	0.42145	6.64378e-07	0.42145	6.35376e-07
0.42389	9.52759e-07	0.42389	6.68955e-07	0.42389	6.39648e-07
0.42633	9.6283e-07	0.42633	6.72312e-07	0.42633	6.43921e-07
0.42877	9.71985e-07	0.42877	6.74754e-07	0.42877	6.46973e-07
0.43121	9.8114e-07	0.43121	6.79636e-07	0.43121	6.5033e-07
0.43365	9.8938e-07	0.43365	6.82078e-07	0.43365	6.53687e-07
0.4361	9.97009e-07	0.4361	6.85435e-07	0.4361	6.57959e-07
0.43854	1.00769e-06	0.43854	6.90623e-07	0.43854	6.58569e-07
0.44098	1.01685e-06	0.44098	6.93369e-07	0.44098	6.64063e-07
0.44342	1.026e-06	0.44342	6.97337e-07	0.44342	6.65283e-07
0.44586	1.03638e-06	0.44586	7.00388e-07	0.44586	6.69861e-07
0.4483	1.04523e-06	0.4483	7.04356e-07	0.4483	6.72913e-07
0.45074	1.05621e-06	0.45074	7.07407e-07	0.45074	6.78101e-07
0.45319	1.06323e-06	0.45319	7.10154e-07	0.45319	6.79321e-07
0.45563	1.07391e-06	0.45563	7.15342e-07	0.45563	6.83289e-07
0.45807	1.08215e-06	0.45807	7.17783e-07	0.45807	6.87256e-07
0.46051	1.091e-06	0.46051	7.22056e-07	0.46051	6.92749e-07
0.46295	1.10168e-06	0.46295	7.25108e-07	0.46295	6.95496e-07
0.46539	1.11237e-06	0.46539	7.28465e-07	0.46539	6.99463e-07
0.46783	1.12244e-06	0.46783	7.32432e-07	0.46783	7.02515e-07
0.47028	1.13495e-06	0.47028	7.35789e-07	0.47028	7.06482e-07
0.47272	1.14471e-06	0.47272	7.38535e-07	0.47272	7.09534e-07
0.47516	1.1557e-06	0.47516	7.39756e-07	0.47516	7.14111e-07
0.4776	1.16394e-06	0.4776	7.44944e-07	0.4776	7.17163e-07
0.48004	1.17493e-06	0.48004	7.48606e-07	0.48004	7.22961e-07
0.48248	1.18378e-06	0.48248	7.50132e-07	0.48248	7.23877e-07
0.48492	1.19293e-06	0.48492	7.56236e-07	0.48492	7.2876e-07
0.48737	1.20087e-06	0.48737	7.59592e-07	0.48737	7.33948e-07
0.48981	1.21368e-06	0.48981	7.61424e-07	0.48981	7.37e-07
0.49225	1.22284e-06	0.49225	7.65696e-07	0.49225	7.40662e-07
0.49469	1.23535e-06	0.49469	7.68137e-07	0.49469	7.4707e-07
0.49713	1.24542e-06	0.49713	7.7241e-07	0.49713	7.48901e-07
0.49957	1.25458e-06	0.49957	7.76377e-07	0.49957	7.547e-07
0.50201	1.26465e-06	0.50201	7.79124e-07	0.50201	7.58362e-07
0.50446	1.27747e-06	0.50446	7.83091e-07	0.50446	7.6355e-07
0.5069	1.28845e-06	0.5069	7.86448e-07	0.5069	7.67212e-07
0.50934	1.29883e-06	0.50934	7.91026e-07	0.50934	7.724e-07
0.51178	1.31042e-06	0.51178	7.93162e-07	0.51178	7.77588e-07
0.51422	1.3208e-06	0.51422	7.96214e-07	0.51422	7.81555e-07
0.51666	1.33148e-06	0.51666	8.01096e-07	0.51666	7.86743e-07
0.5191	1.3446e-06	0.5191	8.05064e-07	0.5191	7.901e-07
0.52155	1.35498e-06	0.52155	8.0781e-07	0.52155	7.95593e-07
0.52399	1.36566e-06	0.52399	8.12388e-07	0.52399	8.00476e-07
0.52643	1.37726e-06	0.52643	8.1605e-07	0.52643	8.05664e-07
0.52887	1.39008e-06	0.52887	8.19712e-07	0.52887	8.10242e-07
0.53131	1.40106e-06	0.53131	8.23374e-07	0.53131	8.14514e-07
0.53375	1.41388e-06	0.53375	8.26121e-07	0.53375	8.20313e-07
0.53619	1.42609e-06	0.53619	8.30088e-07	0.53619	8.25806e-07
0.53864	1.43585e-06	0.53864	8.34971e-07	0.53864	8.30383e-07
0.54108	1.44775e-06	0.54108	8.37412e-07	0.54108	8.35876e-07
0.54352	1.45813e-06	0.54352	8.41685e-07	0.54352	8.41064e-07
0.54596	1.47247e-06	0.54596	8.46262e-07	0.54596	8.46252e-07
0.5484	1.48407e-06	0.5484	8.49925e-07	0.5484	8.52661e-07
0.55084	1.49628e-06	0.55084	8.53892e-07	0.55084	8.58154e-07
0.55328	1.50879e-06	0.55328	8.57554e-07	0.55328	8.63647e-07
0.55573	1.52222e-06	0.55573	8.62132e-07	0.55573	8.6853e-07
0.55817	1.53412e-06	0.55817	8.66099e-07	0.55817	8.74329e-07
0.56061	1.54602e-06	0.56061	8.69151e-07	0.56061	8.79822e-07
0.56305	1.56006e-06	0.56305	8.73423e-07	0.56305	8.8562e-07
0.56549	1.57257e-06	0.56549	8.78001e-07	0.56549	8.91724e-07
0.56793	1.58569e-06	0.56793	8.82883e-07	0.56793	8.98743e-07
0.57037	1.59821e-06	0.57037	8.8624e-07	0.57037	9.021e-07
0.57281	1.61102e-06	0.57281	8.90818e-07	0.57281	9.10339e-07
0.57526	1.62384e-06	0.57526	8.95396e-07	0.57526	9.16138e-07
0.5777	1.6391e-06	0.5777	8.99058e-07	0.5777	9.23462e-07
0.58014	1.65009e-06	0.58014	9.0333e-07	0.58014	9.2804e-07
0.58258	1.66565e-06	0.58258	9.07908e-07	0.58258	9.35059e-07
0.58502	1.67755e-06	0.58502	9.1096e-07	0.58502	9.40857e-07
0.58746	1.69189e-06	0.58746	9.15537e-07	0.58746	9.47266e-07
0.5899	1.70532e-06	0.5899	9.18894e-07	0.5899	9.552e-07
0.59235	1.71997e-06	0.59235	9.25303e-07	0.59235	9.59473e-07
0.59479	1.73462e-06	0.59479	9.2866e-07	0.59479	9.67712e-07
0.59723	1.74896e-06	0.59723	9.32322e-07	0.59723	9.75342e-07
0.59967	1.76392e-06	0.59967	9.3812e-07	0.59967	9.8175e-07
0.60211	1.77765e-06	0.60211	9.43613e-07	0.60211	9.89075e-07
0.60455	1.79291e-06	0.60455	9.47581e-07	0.60455	9.94873e-07
0.60699	1.80908e-06	0.60699	9.53074e-07	0.60699	1.00281e-06
0.60944	1.82343e-06	0.60944	9.56126e-07	0.60944	1.00922e-06
0.61188	1.83716e-06	0.61188	9.60398e-07	0.61188	1.01807e-06
0.61432	1.85059e-06	0.61432	9.65891e-07	0.61432	1.02478e-06
0.61676	1.86462e-06	0.61676	9.70164e-07	0.61676	1.03271e-06
0.6192	1.87958e-06	0.6192	9.75047e-07	0.6192	1.04034e-06
0.62164	1.89423e-06	0.62164	9.77793e-07	0.62164	1.04736e-06
0.62408	1.90887e-06	0.62408	9.83592e-07	0.62408	1.0553e-06
0.62653	1.92322e-06	0.62653	9.88474e-07	0.62653	1.06323e-06
0.62897	1.93695e-06	0.62897	9.93662e-07	0.62897	1.07086e-06
0.63141	1.95129e-06	0.63141	9.97935e-07	0.63141	1.07849e-06
0.63385	1.96472e-06	0.63385	1.00251e-06	0.63385	1.08582e-06
0.63629	1.97998e-06	0.63629	1.00923e-06	0.63629	1.09528e-06
0.63873	1.99493e-06	0.63873	1.01319e-06	0.63873	1.10291e-06
0.64117	2.01111e-06	0.64117	1.0193e-06	0.64117	1.11115e-06
0.64362	2.02301e-06	0.64362	1.02387e-06	0.64362	1.11908e-06
0.64606	2.04224e-06	0.64606	1.03028e-06	0.64606	1.12762e-06
0.6485	2.05536e-06	0.6485	1.03669e-06	0.6485	1.13495e-06
0.65094	2.07031e-06	0.65094	1.04096e-06	0.65094	1.14655e-06
0.65338	2.08405e-06	0.65338	1.04646e-06	0.65338	1.15509e-06
0.65582	2.10022e-06	0.65582	1.05317e-06	0.65582	1.16241e-06
0.65826	2.11395e-06	0.65826	1.05775e-06	0.65826	1.17279e-06
0.66071	2.13013e-06	0.66071	1.06355e-06	0.66071	1.18103e-06
0.66315	2.14417e-06	0.66315	1.06843e-06	0.66315	1.18744e-06
0.66559	2.15851e-06	0.66559	1.07545e-06	0.66559	1.19904e-06
0.66803	2.17224e-06	0.66803	1.08033e-06	0.66803	1.20605e-06
0.67047	2.19055e-06	0.67047	1.08766e-06	0.67047	1.21765e-06
0.67291	2.20398e-06	0.67291	1.09498e-06	0.67291	1.22742e-06
0.67535	2.21954e-06	0.67535	1.10139e-06	0.67535	1.23779e-06
0.6778	2.23663e-06	0.6778	1.10566e-06	0.6778	1.24695e-06
0.68024	2.25372e-06	0.68024	1.11115e-06	0.68024	1.25641e-06
0.68268	2.26654e-06	0.68268	1.11726e-06	0.68268	1.26495e-06
0.68512	2.28424e-06	0.68512	1.12458e-06	0.68512	1.27686e-06
0.68756	2.29767e-06	0.68756	1.13099e-06	0.68756	1.28754e-06
0.69	2.3114e-06	0.69	1.13832e-06	0.69	1.29822e-06
0.69244	2.32758e-06	0.69244	1.14472e-06	0.69244	1.30798e-06
0.69489	2.34375e-06	0.69489	1.15205e-06	0.69489	1.31897e-06
0.69733	2.35962e-06	0.69733	1.15907e-06	0.69733	1.32782e-06
0.69977	2.37671e-06	0.69977	1.1667e-06	0.69977	1.33942e-06
0.70221	2.39014e-06	0.70221	1.17219e-06	0.70221	1.3501e-06
0.70465	2.40784e-06	0.70465	1.18104e-06	0.70465	1.36108e-06
0.70709	2.42493e-06	0.70709	1.18684e-06	0.70709	1.37421e-06
0.70953	2.44293e-06	0.70953	1.19599e-06	0.70953	1.38275e-06
0.71198	2.46185e-06	0.71198	1.20423e-06	0.71198	1.39435e-06
0.71442	2.47833e-06	0.71442	1.21125e-06	0.71442	1.40564e-06
0.71686	2.4942e-06	0.71686	1.21919e-06	0.71686	1.41754e-06
0.7193	2.5119e-06	0.7193	1.22804e-06	0.7193	1.42822e-06
0.72174	2.52686e-06	0.72174	1.23628e-06	0.72174	1.44287e-06
0.72418	2.54242e-06	0.72418	1.24391e-06	0.72418	1.45294e-06
0.72662	2.55676e-06	0.72662	1.25337e-06	0.72662	1.46423e-06
0.72906	2.57416e-06	0.72906	1.26161e-06	0.72906	1.47522e-06
0.73151	2.58972e-06	0.73151	1.27137e-06	0.73151	1.49048e-06
0.73395	2.6059e-06	0.73395	1.279e-06	0.73395	1.50085e-06
0.73639	2.62054e-06	0.73639	1.28907e-06	0.73639	1.51276e-06
0.73883	2.63733e-06	0.73883	1.29853e-06	0.73883	1.5274e-06
0.74127	2.65198e-06	0.74127	1.30677e-06	0.74127	1.53961e-06
0.74371	2.66602e-06	0.74371	1.31501e-06	0.74371	1.55151e-06
0.74615	2.68127e-06	0.74615	1.32661e-06	0.74615	1.56647e-06
0.7486	2.69745e-06	0.7486	1.33454e-06	0.7486	1.5799e-06
0.75104	2.71027e-06	0.75104	1.34431e-06	0.75104	1.59363e-06
0.75348	2.72644e-06	0.75348	1.3556e-06	0.75348	1.60797e-06
0.75592	2.74048e-06	0.75592	1.36445e-06	0.75592	1.62201e-06
0.75836	2.75726e-06	0.75836	1.37452e-06	0.75836	1.63605e-06
0.7608	2.77039e-06	0.7608	1.38398e-06	0.7608	1.6507e-06
0.76324	2.78656e-06	0.76324	1.39436e-06	0.76324	1.66687e-06
0.76569	2.79846e-06	0.76569	1.40321e-06	0.76569	1.67816e-06
0.76813	2.81158e-06	0.76813	1.41389e-06	0.76813	1.69586e-06
0.77057	2.82532e-06	0.77057	1.4264e-06	0.77057	1.70929e-06
0.77301	2.83813e-06	0.77301	1.438e-06	0.77301	1.72577e-06
0.77545	2.85248e-06	0.77545	1.44715e-06	0.77545	1.74133e-06
0.77789	2.86865e-06	0.77789	1.45875e-06	0.77789	1.7569e-06
0.78033	2.88025e-06	0.78033	1.47004e-06	0.78033	1.77185e-06
0.78278	2.8949e-06	0.78278	1.48072e-06	0.78278	1.78833e-06
0.78522	2.90924e-06	0.78522	1.49232e-06	0.78522	1.8045e-06
0.78766	2.92419e-06	0.78766	1.50392e-06	0.78766	1.8219e-06
0.7901	2.93732e-06	0.7901	1.51521e-06	0.7901	1.83899e-06
0.79254	2.95105e-06	0.79254	1.5268e-06	0.79254	1.85608e-06
0.79498	2.96387e-06	0.79498	1.5381e-06	0.79498	1.87103e-06
0.79742	2.97546e-06	0.79742	1.54969e-06	0.79742	1.88965e-06
0.79987	2.98462e-06	0.79987	1.56159e-06	0.79987	1.90674e-06
0.80231	2.99683e-06	0.80231	1.57502e-06	0.80231	1.92627e-06
0.80475	3.00751e-06	0.80475	1.5854e-06	0.80475	1.94061e-06
0.80719	3.01941e-06	0.80719	1.59883e-06	0.80719	1.95923e-06
0.80963	3.02948e-06	0.80963	1.61408e-06	0.80963	1.97662e-06
0.81207	3.04199e-06	0.81207	1.62568e-06	0.81207	1.99738e-06
0.81451	3.04962e-06	0.81451	1.63728e-06	0.81451	2.01385e-06
0.81696	3.06183e-06	0.81696	1.65254e-06	0.81696	2.03217e-06
0.8194	3.06793e-06	0.8194	1.66352e-06	0.8194	2.05139e-06
0.82184	3.07831e-06	0.82184	1.67756e-06	0.82184	2.07031e-06
0.82428	3.08563e-06	0.82428	1.69038e-06	0.82428	2.08984e-06
0.82672	3.0957e-06	0.82672	1.70442e-06	0.82672	2.10815e-06
0.82916	3.1015e-06	0.82916	1.71601e-06	0.82916	2.12646e-06
0.8316	3.11066e-06	0.8316	1.7328e-06	0.8316	2.14752e-06
0.83405	3.11646e-06	0.83405	1.74623e-06	0.83405	2.16644e-06
0.83649	3.12256e-06	0.83649	1.76026e-06	0.83649	2.18964e-06
0.83893	3.12561e-06	0.83893	1.77308e-06	0.83893	2.20642e-06
0.84137	3.13202e-06	0.84137	1.78865e-06	0.84137	2.22839e-06
0.84381	3.13629e-06	0.84381	1.80207e-06	0.84381	2.24945e-06
0.84625	3.13934e-06	0.84625	1.81672e-06	0.84625	2.26807e-06
0.84869	3.14606e-06	0.84869	1.83106e-06	0.84869	2.28973e-06
0.85114	3.15033e-06	0.85114	1.84724e-06	0.85114	2.31323e-06
0.85358	3.15338e-06	0.85358	1.86036e-06	0.85358	2.33337e-06
0.85602	3.15765e-06	0.85602	1.87654e-06	0.85602	2.35565e-06
0.85846	3.1601e-06	0.85846	1.89088e-06	0.85846	2.3761e-06
0.8609	3.16254e-06	0.8609	1.90492e-06	0.8609	2.39899e-06
0.86334	3.16254e-06	0.86334	1.91987e-06	0.86334	2.41913e-06
0.86578	3.16254e-06	0.86578	1.93666e-06	0.86578	2.44202e-06
0.86823	3.16406e-06	0.86823	1.95191e-06	0.86823	2.46307e-06
0.87067	3.1662e-06	0.87067	1.969e-06	0.87067	2.48749e-06
0.87311	3.16589e-06	0.87311	1.98274e-06	0.87311	2.50824e-06
0.87555	3.16711e-06	0.87555	1.99891e-06	0.87555	2.53296e-06
0.87799	3.16772e-06	0.87799	2.01417e-06	0.87799	2.55463e-06
0.88043	3.1662e-06	0.88043	2.02943e-06	0.88043	2.57996e-06
0.88287	3.16467e-06	0.88287	2.04591e-06	0.88287	2.60101e-06
0.88531	3.16376e-06	0.88531	2.06361e-06	0.88531	2.62421e-06
0.88776	3.16345e-06	0.88776	2.07826e-06	0.88776	2.64648e-06
0.8902	3.16437e-06	0.8902	2.09626e-06	0.8902	2.67303e-06
0.89264	3.16437e-06	0.89264	2.11213e-06	0.89264	2.69501e-06
0.89508	3.16376e-06	0.89508	2.13014e-06	0.89508	2.71973e-06
0.89752	3.16162e-06	0.89752	2.14479e-06	0.89752	2.74231e-06
0.89996	3.16071e-06	0.89996	2.16401e-06	0.89996	2.76855e-06
0.9024	3.15826e-06	0.9024	2.17927e-06	0.9024	2.79266e-06
0.90485	3.15674e-06	0.90485	2.19697e-06	0.90485	2.8183e-06
0.90729	3.15613e-06	0.90729	2.21314e-06	0.90729	2.84485e-06
0.90973	3.15796e-06	0.90973	2.23023e-06	0.90973	2.87048e-06
0.91217	3.15399e-06	0.91217	2.24732e-06	0.91217	2.89337e-06
0.91461	3.15338e-06	0.91461	2.26686e-06	0.91461	2.92145e-06
0.91705	3.14941e-06	0.91705	2.28334e-06	0.91705	2.94525e-06
0.91949	3.1485e-06	0.91949	2.30348e-06	0.91949	2.97241e-06
0.92194	3.14392e-06	0.92194	2.31874e-06	0.92194	2.99866e-06
0.92438	3.1424e-06	0.92438	2.33918e-06	0.92438	3.0249e-06
0.92682	3.13934e-06	0.92682	2.3578e-06	0.92682	3.05359e-06
0.92926	3.13873e-06	0.92926	2.37733e-06	0.92926	3.08075e-06
0.9317	3.13416e-06	0.9317	2.39503e-06	0.9317	3.10638e-06
0.93414	3.12927e-06	0.93414	2.41578e-06	0.93414	3.13599e-06
0.93658	3.12378e-06	0.93658	2.43318e-06	0.93658	3.15948e-06
0.93903	3.12561e-06	0.93903	2.45393e-06	0.93903	3.19e-06
0.94147	3.12439e-06	0.94147	2.47193e-06	0.94147	3.21625e-06
0.94391	3.12347e-06	0.94391	2.48719e-06	0.94391	3.24646e-06
0.94635	3.12195e-06	0.94635	2.50611e-06	0.94635	3.27423e-06
0.94879	3.12164e-06	0.94879	2.52626e-06	0.94879	3.30475e-06
0.95123	3.11859e-06	0.95123	2.54334e-06	0.95123	3.33282e-06
0.95367	3.11707e-06	0.95367	2.56074e-06	0.95367	3.36456e-06
0.95612	3.11218e-06	0.95612	2.57844e-06	0.95612	3.39294e-06
0.95856	3.11035e-06	0.95856	2.59828e-06	0.95856	3.42346e-06
0.961	3.10577e-06	0.961	2.61537e-06	0.961	3.45123e-06
0.96344	3.10455e-06	0.96344	2.63398e-06	0.96344	3.48114e-06
0.96588	3.10059e-06	0.96588	2.65351e-06	0.96588	3.51135e-06
0.96832	3.10242e-06	0.96832	2.67457e-06	0.96832	3.54523e-06
0.97076	3.09967e-06	0.97076	2.69136e-06	0.97076	3.57544e-06
0.97321	3.10089e-06	0.97321	2.71333e-06	0.97321	3.6084e-06
0.97565	3.10089e-06	0.97565	2.72981e-06	0.97565	3.64014e-06
0.97809	3.09937e-06	0.97809	2.74873e-06	0.97809	3.67004e-06
0.98053	3.09662e-06	0.98053	2.76643e-06	0.98053	3.703e-06
0.98297	3.09326e-06	0.98297	2.78382e-06	0.98297	3.73505e-06
0.98541	3.09174e-06	0.98541	2.80397e-06	0.98541	3.76862e-06
0.98785	3.08777e-06	0.98785	2.82411e-06	0.98785	3.80493e-06
0.9903	3.08655e-06	0.9903	2.84303e-06	0.9903	3.83484e-06
0.99274	3.08716e-06	0.99274	2.86378e-06	0.99274	3.87238e-06
0.99518	3.08655e-06	0.99518	2.88178e-06	0.99518	3.90442e-06
0.99762	3.08624e-06	0.99762	2.90132e-06	0.99762	3.94165e-06
1.00006	3.08472e-06	1.00006	2.91871e-06	1.00006	3.97522e-06
1.0025	3.08197e-06	1.0025	2.93824e-06	1.0025	4.01123e-06
1.00494	3.07831e-06	1.00494	2.95869e-06	1.00494	4.04724e-06
1.00739	3.07617e-06	1.00739	2.97975e-06	1.00739	4.08691e-06
1.00983	3.07648e-06	1.00983	2.99775e-06	1.00983	4.12048e-06
1.01227	3.07648e-06	1.01227	3.0185e-06	1.01227	4.15955e-06
1.01471	3.078e-06	1.01471	3.03651e-06	1.01471	4.19617e-06
1.01715	3.07861e-06	1.01715	3.05818e-06	1.01715	4.2334e-06
1.01959	3.0777e-06	1.01959	3.07527e-06	1.01959	4.27155e-06
1.02203	3.07617e-06	1.02203	3.0948e-06	1.02203	4.31091e-06
1.02448	3.07648e-06	1.02448	3.11402e-06	1.02448	4.34753e-06
1.02692	3.07648e-06	1.02692	3.1363e-06	1.02692	4.38995e-06
1.02936	3.07831e-06	1.02936	3.15583e-06	1.02936	4.42993e-06
1.0318	3.08105e-06	1.0318	3.17597e-06	1.0318	4.47418e-06
1.03424	3.08105e-06	1.03424	3.19642e-06	1.03424	4.51172e-06
1.03668	3.08533e-06	1.03668	3.21748e-06	1.03668	4.55505e-06
1.03912	3.08655e-06	1.03912	3.23579e-06	1.03912	4.59717e-06
1.04156	3.08807e-06	1.04156	3.25563e-06	1.04156	4.63867e-06
1.04401	3.09113e-06	1.04401	3.27577e-06	1.04401	4.68292e-06
1.04645	3.09082e-06	1.04645	3.29804e-06	1.04645	4.73022e-06
1.04889	3.09174e-06	1.04889	3.31605e-06	1.04889	4.77173e-06
1.05133	3.09326e-06	1.05133	3.33772e-06	1.05133	4.82025e-06
1.05377	3.09357e-06	1.05377	3.35542e-06	1.05377	4.86145e-06
1.05621	3.09418e-06	1.05621	3.3777e-06	1.05621	4.91089e-06
1.05865	3.09479e-06	1.05865	3.3954e-06	1.05865	4.95667e-06
1.0611	3.09662e-06	1.0611	3.41859e-06	1.0611	5.00427e-06
1.06354	3.09753e-06	1.06354	3.43751e-06	1.06354	5.05096e-06
1.06598	3.09937e-06	1.06598	3.46162e-06	1.06598	5.10498e-06
1.06842	3.10242e-06	1.06842	3.48054e-06	1.06842	5.14954e-06
1.07086	3.10638e-06	1.07086	3.50251e-06	1.07086	5.19958e-06
1.0733	3.10883e-06	1.0733	3.52357e-06	1.0733	5.24933e-06
1.07574	3.1131e-06	1.07574	3.54676e-06	1.07574	5.30151e-06
1.07819	3.11554e-06	1.07819	3.5666e-06	1.07819	5.35156e-06
1.08063	3.11981e-06	1.08063	3.58827e-06	1.08063	5.40344e-06
1.08307	3.12469e-06	1.08307	3.60902e-06	1.08307	5.45532e-06
1.08551	3.12927e-06	1.08551	3.63313e-06	1.08551	5.50934e-06
1.08795	3.13202e-06	1.08795	3.65571e-06	1.08795	5.56244e-06
1.09039	3.13782e-06	1.09039	3.6789e-06	1.09039	5.61737e-06
1.09283	3.1424e-06	1.09283	3.70088e-06	1.09283	5.66925e-06
1.09528	3.14758e-06	1.09528	3.72407e-06	1.09528	5.7254e-06
1.09772	3.15399e-06	1.09772	3.74635e-06	1.09772	5.78094e-06
1.10016	3.15887e-06	1.10016	3.76924e-06	1.10016	5.83832e-06
1.1026	3.16528e-06	1.1026	3.79457e-06	1.1026	5.89417e-06
1.10504	3.16925e-06	1.10504	3.81928e-06	1.10504	5.95245e-06
1.10748	3.17383e-06	1.10748	3.84156e-06	1.10748	6.00769e-06
1.10992	3.17932e-06	1.10992	3.86598e-06	1.10992	6.073e-06
1.11237	3.18329e-06	1.11237	3.88825e-06	1.11237	6.12793e-06
1.11481	3.19153e-06	1.11481	3.91328e-06	1.11481	6.18896e-06
1.11725	3.19733e-06	1.11725	3.93617e-06	1.11725	6.24695e-06
1.11969	3.20343e-06	1.11969	3.96089e-06	1.11969	6.30798e-06
1.12213	3.21045e-06	1.12213	3.98469e-06	1.12213	6.36597e-06
1.12457	3.21564e-06	1.12457	4.01216e-06	1.12457	6.427e-06
1.12701	3.22144e-06	1.12701	4.03535e-06	1.12701	6.48804e-06
1.12946	3.22693e-06	1.12946	4.06098e-06	1.12946	6.55212e-06
1.1319	3.23273e-06	1.1319	4.0854e-06	1.1319	6.61316e-06
1.13434	3.24127e-06	1.13434	4.11195e-06	1.13434	6.67725e-06
1.13678	3.24738e-06	1.13678	4.13728e-06	1.13678	6.74133e-06
1.13922	3.25592e-06	1.13922	4.16291e-06	1.13922	6.80237e-06
1.14166	3.26385e-06	1.14166	4.18855e-06	1.14166	6.86646e-06
1.1441	3.27209e-06	1.1441	4.21754e-06	1.1441	6.93359e-06
1.14655	3.2785e-06	1.14655	4.24317e-06	1.14655	6.99463e-06
1.14899	3.28674e-06	1.14899	4.27125e-06	1.14899	7.06177e-06
1.15143	3.29407e-06	1.15143	4.2978e-06	1.15143	7.12585e-06
1.15387	3.30414e-06	1.15387	4.32862e-06	1.15387	7.19604e-06
1.15631	3.30933e-06	1.15631	4.35548e-06	1.15631	7.25708e-06
1.15875	3.32001e-06	1.15875	4.38386e-06	1.15875	7.32422e-06
1.16119	3.32916e-06	1.16119	4.41438e-06	1.16119	7.39136e-06
1.16364	3.33832e-06	1.16364	4.44398e-06	1.16364	7.46155e-06
1.16608	3.3493e-06	1.16608	4.47084e-06	1.16608	7.52869e-06
1.16852	3.3609e-06	1.16852	4.50349e-06	1.16852	7.59888e-06
1.17096	3.37097e-06	1.17096	4.53279e-06	1.17096	7.66602e-06
1.1734	3.38074e-06	1.1734	4.56483e-06	1.1734	7.73621e-06
1.17584	3.3905e-06	1.17584	4.59504e-06	1.17584	7.80334e-06
1.17828	3.40118e-06	1.17828	4.62709e-06	1.17828	7.87354e-06
1.18073	3.41339e-06	1.18073	4.65913e-06	1.18073	7.94373e-06
1.18317	3.4256e-06	1.18317	4.69239e-06	1.18317	8.01697e-06
1.18561	3.43231e-06	1.18561	4.72627e-06	1.18561	8.08411e-06
1.18805	3.44421e-06	1.18805	4.7577e-06	1.18805	8.15735e-06
1.19049	3.45459e-06	1.19049	4.79127e-06	1.19049	8.22754e-06
1.19293	3.46527e-06	1.19293	4.82484e-06	1.19293	8.30078e-06
1.19537	3.47443e-06	1.19537	4.85932e-06	1.19537	8.37097e-06
1.19781	3.48755e-06	1.19781	4.89259e-06	1.19781	8.44421e-06
1.20026	3.49854e-06	1.20026	4.9286e-06	1.20026	8.51746e-06
1.2027	3.51044e-06	1.2027	4.96583e-06	1.2027	8.59375e-06
1.20514	3.52142e-06	1.20514	5.00062e-06	1.20514	8.66394e-06
1.20758	3.53455e-06	1.20758	5.03846e-06	1.20758	8.74023e-06
1.21002	3.54462e-06	1.21002	5.07386e-06	1.21002	8.81348e-06
1.21246	3.5556e-06	1.21246	5.11109e-06	1.21246	8.88977e-06
1.2149	3.56659e-06	1.2149	5.1471e-06	1.2149	8.96301e-06
1.21735	3.57727e-06	1.21735	5.18678e-06	1.21735	9.03931e-06
1.21979	3.59192e-06	1.21979	5.22462e-06	1.21979	9.1156e-06
1.22223	3.60626e-06	1.22223	5.26338e-06	1.22223	9.19495e-06
1.22467	3.62091e-06	1.22467	5.30213e-06	1.22467	9.27124e-06
1.22711	3.638e-06	1.22711	5.34333e-06	1.22711	9.35059e-06
1.22955	3.65234e-06	1.22955	5.38178e-06	1.22955	9.42688e-06
1.23199	3.67035e-06	1.23199	5.42329e-06	1.23199	9.50928e-06
1.23444	3.68622e-06	1.23444	5.46296e-06	1.23444	9.58557e-06
1.23688	3.703e-06	1.23688	5.50508e-06	1.23688	9.66797e-06
1.23932	3.71765e-06	1.23932	5.54475e-06	1.23932	9.74731e-06
1.24176	3.7326e-06	1.24176	5.58961e-06	1.24176	9.82971e-06
1.2442	3.74847e-06	1.2442	5.62928e-06	1.2442	9.90601e-06
1.24664	3.76648e-06	1.24664	5.67292e-06	1.24664	9.99146e-06
1.24908	3.78113e-06	1.24908	5.71504e-06	1.24908	1.00739e-05
1.25153	3.79761e-06	1.25153	5.7602e-06	1.25153	1.01532e-05
1.25397	3.81622e-06	1.25397	5.80293e-06	1.25397	1.02325e-05
1.25641	3.83545e-06	1.25641	5.8487e-06	1.25641	1.03149e-05
1.25885	3.85284e-06	1.25885	5.89448e-06	1.25885	1.04004e-05
1.26129	3.87207e-06	1.26129	5.94026e-06	1.26129	1.04858e-05
1.26373	3.89008e-06	1.26373	5.98603e-06	1.26373	1.05713e-05
1.26617	3.90869e-06	1.26617	6.03181e-06	1.26617	1.06598e-05
1.26862	3.927e-06	1.26862	6.07759e-06	1.26862	1.07422e-05
1.27106	3.94928e-06	1.27106	6.12641e-06	1.27106	1.08307e-05
1.2735	3.96912e-06	1.2735	6.17524e-06	1.2735	1.09131e-05
1.27594	3.98804e-06	1.27594	6.22102e-06	1.27594	1.10016e-05
1.27838	4.01154e-06	1.27838	6.26985e-06	1.27838	1.10901e-05
1.28082	4.03351e-06	1.28082	6.31867e-06	1.28082	1.11816e-05
1.28326	4.05487e-06	1.28326	6.3675e-06	1.28326	1.12701e-05
1.28571	4.08051e-06	1.28571	6.41938e-06	1.28571	1.13586e-05
1.28815	4.10522e-06	1.28815	6.46821e-06	1.28815	1.14502e-05
1.29059	4.12933e-06	1.29059	6.52009e-06	1.29059	1.15417e-05
1.29303	4.15344e-06	1.29303	6.56892e-06	1.29303	1.16302e-05
1.29547	4.17755e-06	1.29547	6.6208e-06	1.29547	1.17188e-05
1.29791	4.20685e-06	1.29791	6.67268e-06	1.29791	1.18103e-05
1.30035	4.23523e-06	1.30035	6.72761e-06	1.30035	1.19049e-05
1.3028	4.26178e-06	1.3028	6.77949e-06	1.3028	1.19934e-05
1.30524	4.29077e-06	1.30524	6.83137e-06	1.30524	1.20911e-05
1.30768	4.31641e-06	1.30768	6.8863e-06	1.30768	1.21826e-05
1.31012	4.34601e-06	1.31012	6.94123e-06	1.31012	1.22803e-05
1.31256	4.37103e-06	1.31256	6.99311e-06	1.31256	1.23718e-05
1.315	4.40094e-06	1.315	7.04804e-06	1.315	1.24664e-05
1.31744	4.42963e-06	1.31744	7.10603e-06	1.31744	1.25641e-05
1.31989	4.46075e-06	1.31989	7.16401e-06	1.31989	1.26648e-05
1.32233	4.48975e-06	1.32233	7.21894e-06	1.32233	1.27594e-05
1.32477	4.5166e-06	1.32477	7.27693e-06	1.32477	1.28601e-05
1.32721	4.54559e-06	1.32721	7.33186e-06	1.32721	1.29578e-05
1.32965	4.57916e-06	1.32965	7.39289e-06	1.32965	1.30615e-05
1.33209	4.61151e-06	1.33209	7.45088e-06	1.33209	1.31622e-05
1.33453	4.64661e-06	1.33453	7.50886e-06	1.33453	1.32629e-05
1.33698	4.67957e-06	1.33698	7.56684e-06	1.33698	1.33636e-05
1.33942	4.71863e-06	1.33942	7.62788e-06	1.33942	1.34705e-05
1.34186	4.75311e-06	1.34186	7.68586e-06	1.34186	1.35742e-05
1.3443	4.79004e-06	1.3443	7.74995e-06	1.3443	1.3681e-05
1.34674	4.82483e-06	1.34674	7.81098e-06	1.34674	1.37848e-05
1.34918	4.86542e-06	1.34918	7.87507e-06	1.34918	1.38947e-05
1.35162	4.89807e-06	1.35162	7.93305e-06	1.35162	1.39954e-05
1.35406	4.93561e-06	1.35406	7.99714e-06	1.35406	1.41022e-05
1.35651	4.97131e-06	1.35651	8.06123e-06	1.35651	1.4212e-05
1.35895	5.00946e-06	1.35895	8.12532e-06	1.35895	1.43219e-05
1.36139	5.04333e-06	1.36139	8.1894e-06	1.36139	1.44257e-05
1.36383	5.08331e-06	1.36383	8.25654e-06	1.36383	1.45386e-05
1.36627	5.11963e-06	1.36627	8.32063e-06	1.36627	1.46423e-05
1.36871	5.16052e-06	1.36871	8.38471e-06	1.36871	1.47552e-05
1.37115	5.19958e-06	1.37115	8.4549e-06	1.37115	1.48621e-05
1.3736	5.24139e-06	1.3736	8.51899e-06	1.3736	1.49719e-05
1.37604	5.27985e-06	1.37604	8.58918e-06	1.37604	1.50848e-05
1.37848	5.32379e-06	1.37848	8.65937e-06	1.37848	1.51978e-05
1.38092	5.36469e-06	1.38092	8.72651e-06	1.38092	1.53076e-05
1.38336	5.40863e-06	1.38336	8.79975e-06	1.38336	1.54266e-05
1.3858	5.45013e-06	1.3858	8.86994e-06	1.3858	1.55396e-05
1.38824	5.49683e-06	1.38824	8.94319e-06	1.38824	1.56555e-05
1.39069	5.53955e-06	1.39069	9.01338e-06	1.39069	1.57684e-05
1.39313	5.58563e-06	1.39313	9.08662e-06	1.39313	1.58875e-05
1.39557	5.63049e-06	1.39557	9.15986e-06	1.39557	1.60065e-05
1.39801	5.67993e-06	1.39801	9.23615e-06	1.39801	1.61285e-05
1.40045	5.72632e-06	1.40045	9.30635e-06	1.40045	1.62445e-05
1.40289	5.77423e-06	1.40289	9.38569e-06	1.40289	1.63666e-05
1.40533	5.81879e-06	1.40533	9.45893e-06	1.40533	1.64856e-05
1.40778	5.86639e-06	1.40778	9.53828e-06	1.40778	1.66077e-05
1.41022	5.91797e-06	1.41022	9.61457e-06	1.41022	1.67297e-05
1.41266	5.9668e-06	1.41266	9.69087e-06	1.41266	1.68549e-05
1.4151	6.01532e-06	1.4151	9.77021e-06	1.4151	1.698e-05
1.41754	6.06995e-06	1.41754	9.85261e-06	1.41754	1.71082e-05
1.41998	6.11877e-06	1.41998	9.9289e-06	1.41998	1.72333e-05
1.42242	6.17371e-06	1.42242	1.00113e-05	1.42242	1.73645e-05
1.42487	6.22253e-06	1.42487	1.00906e-05	1.42487	1.74896e-05
1.42731	6.27747e-06	1.42731	1.0173e-05	1.42731	1.76239e-05
1.42975	6.32935e-06	1.42975	1.02524e-05	1.42975	1.7749e-05
1.43219	6.38428e-06	1.43219	1.03378e-05	1.43219	1.78833e-05
1.43463	6.43616e-06	1.43463	1.04202e-05	1.43463	1.80176e-05
1.43707	6.49109e-06	1.43707	1.05087e-05	1.43707	1.81549e-05
1.43951	6.54297e-06	1.43951	1.05911e-05	1.43951	1.82892e-05
1.44196	6.5979e-06	1.44196	1.06827e-05	1.44196	1.84296e-05
1.4444	6.64978e-06	1.4444	1.07681e-05	1.4444	1.85608e-05
1.44684	6.70776e-06	1.44684	1.08566e-05	1.44684	1.87042e-05
1.44928	6.7627e-06	1.44928	1.09451e-05	1.44928	1.88416e-05
1.45172	6.81763e-06	1.45172	1.10367e-05	1.45172	1.89819e-05
1.45416	6.87866e-06	1.45416	1.11282e-05	1.45416	1.91284e-05
1.4566	6.93665e-06	1.4566	1.12228e-05	1.4566	1.92749e-05
1.45905	6.99158e-06	1.45905	1.13114e-05	1.45905	1.94153e-05
1.46149	7.05566e-06	1.46149	1.1409e-05	1.46149	1.95648e-05
1.46393	7.1106e-06	1.46393	1.15006e-05	1.46393	1.97052e-05
1.46637	7.17468e-06	1.46637	1.15982e-05	1.46637	1.98608e-05
1.46881	7.23572e-06	1.46881	1.16928e-05	1.46881	2.00073e-05
1.47125	7.2937e-06	1.47125	1.17905e-05	1.47125	2.01569e-05
1.47369	7.35779e-06	1.47369	1.18881e-05	1.47369	2.03094e-05
1.47614	7.42188e-06	1.47614	1.19888e-05	1.47614	2.04681e-05
1.47858	7.48291e-06	1.47858	1.20865e-05	1.47858	2.06207e-05
1.48102	7.55005e-06	1.48102	1.21933e-05	1.48102	2.07794e-05
1.48346	7.61414e-06	1.48346	1.2291e-05	1.48346	2.09351e-05
1.4859	7.68127e-06	1.4859	1.23947e-05	1.4859	2.10938e-05
1.48834	7.74536e-06	1.48834	1.24985e-05	1.48834	2.12524e-05
1.49078	7.81555e-06	1.49078	1.26053e-05	1.49078	2.14111e-05
1.49323	7.88269e-06	1.49323	1.27121e-05	1.49323	2.15759e-05
1.49567	7.95593e-06	1.49567	1.2822e-05	1.49567	2.17438e-05
1.49811	8.02307e-06	1.49811	1.29288e-05	1.49811	2.19055e-05
1.50055	8.09937e-06	1.50055	1.30386e-05	1.50055	2.20764e-05

## Sheet: Figure S10(c)
-1.4975	-1.02575e-05	-1.4975	-1.03865e-05	-1.4975	-1.03435e-05
-1.49506	-3.1517e-05	-1.49506	-3.70659e-05	-1.49506	-6.23616e-05
-1.49261	-2.73178e-05	-1.49261	-3.32389e-05	-1.49261	-5.61605e-05
-1.49017	-2.45193e-05	-1.49017	-3.06541e-05	-1.49017	-5.17659e-05
-1.48773	-2.24838e-05	-1.48773	-2.87223e-05	-1.48773	-4.84853e-05
-1.48529	-2.09274e-05	-1.48529	-2.72087e-05	-1.48529	-4.58486e-05
-1.48285	-1.96792e-05	-1.48285	-2.59666e-05	-1.48285	-4.36635e-05
-1.48041	-1.8663e-05	-1.48041	-2.49138e-05	-1.48041	-4.18202e-05
-1.47797	-1.78024e-05	-1.47797	-2.40043e-05	-1.47797	-4.02242e-05
-1.47552	-1.70517e-05	-1.47552	-2.32048e-05	-1.47552	-3.86312e-05
-1.47308	-1.63955e-05	-1.47308	-2.24876e-05	-1.47308	-3.73708e-05
-1.47064	-1.58157e-05	-1.47064	-2.18406e-05	-1.47064	-3.62477e-05
-1.4682	-1.52908e-05	-1.4682	-2.12547e-05	-1.4682	-3.52101e-05
-1.46576	-1.48239e-05	-1.46576	-2.07176e-05	-1.46576	-3.42702e-05
-1.46332	-1.43844e-05	-1.46332	-2.02171e-05	-1.46332	-3.33913e-05
-1.46088	-1.39847e-05	-1.46088	-1.97593e-05	-1.46088	-3.25826e-05
-1.45844	-1.36093e-05	-1.45844	-1.9329e-05	-1.45844	-3.18257e-05
-1.45599	-1.32614e-05	-1.45599	-1.89201e-05	-1.45599	-3.11147e-05
-1.45355	-1.29379e-05	-1.45355	-1.85325e-05	-1.45355	-3.04433e-05
-1.45111	-1.26388e-05	-1.45111	-1.81785e-05	-1.45111	-2.98116e-05
-1.44867	-1.23459e-05	-1.44867	-1.78337e-05	-1.44867	-2.92043e-05
-1.44623	-1.20804e-05	-1.44623	-1.75071e-05	-1.44623	-2.86428e-05
-1.44379	-1.18179e-05	-1.44379	-1.71989e-05	-1.44379	-2.80934e-05
-1.44135	-1.15768e-05	-1.44135	-1.68968e-05	-1.44135	-2.75807e-05
-1.4389	-1.13418e-05	-1.4389	-1.6613e-05	-1.4389	-2.70833e-05
-1.43646	-1.1113e-05	-1.43646	-1.63414e-05	-1.43646	-2.66103e-05
-1.43402	-1.08902e-05	-1.43402	-1.60728e-05	-1.43402	-2.61495e-05
-1.43158	-1.06827e-05	-1.43158	-1.58226e-05	-1.43158	-2.57161e-05
-1.42914	-1.04782e-05	-1.42914	-1.55784e-05	-1.42914	-2.52858e-05
-1.4267	-1.02951e-05	-1.4267	-1.53404e-05	-1.4267	-2.4883e-05
-1.42426	-1.01181e-05	-1.42426	-1.51115e-05	-1.42426	-2.44863e-05
-1.42181	-9.95329e-06	-1.42181	-1.48948e-05	-1.42181	-2.41078e-05
-1.41937	-9.78239e-06	-1.41937	-1.46812e-05	-1.41937	-2.37386e-05
-1.41693	-9.61759e-06	-1.41693	-1.44737e-05	-1.41693	-2.33815e-05
-1.41449	-9.45585e-06	-1.41449	-1.42692e-05	-1.41449	-2.30275e-05
-1.41205	-9.29716e-06	-1.41205	-1.4077e-05	-1.41205	-2.26979e-05
-1.40961	-9.14762e-06	-1.40961	-1.38816e-05	-1.40961	-2.23653e-05
-1.40717	-9.0164e-06	-1.40717	-1.36955e-05	-1.40717	-2.20479e-05
-1.40472	-8.89127e-06	-1.40472	-1.35124e-05	-1.40472	-2.17397e-05
-1.40228	-8.7692e-06	-1.40228	-1.33323e-05	-1.40228	-2.14376e-05
-1.39984	-8.64103e-06	-1.39984	-1.31584e-05	-1.39984	-2.11446e-05
-1.3974	-8.52201e-06	-1.3974	-1.29875e-05	-1.3974	-2.08547e-05
-1.39496	-8.39689e-06	-1.39496	-1.28166e-05	-1.39496	-2.05709e-05
-1.39252	-8.27787e-06	-1.39252	-1.26548e-05	-1.39252	-2.02992e-05
-1.39008	-8.15885e-06	-1.39008	-1.24931e-05	-1.39008	-2.00246e-05
-1.38763	-8.04289e-06	-1.38763	-1.23375e-05	-1.38763	-1.97682e-05
-1.38519	-7.93607e-06	-1.38519	-1.21849e-05	-1.38519	-1.95119e-05
-1.38275	-7.83231e-06	-1.38275	-1.20353e-05	-1.38275	-1.92616e-05
-1.38031	-7.72855e-06	-1.38031	-1.18919e-05	-1.38031	-1.90175e-05
-1.37787	-7.6309e-06	-1.37787	-1.17454e-05	-1.37787	-1.87764e-05
-1.37543	-7.53324e-06	-1.37543	-1.1602e-05	-1.37543	-1.85384e-05
-1.37299	-7.43559e-06	-1.37299	-1.14677e-05	-1.37299	-1.83095e-05
-1.37054	-7.33793e-06	-1.37054	-1.13273e-05	-1.37054	-1.80806e-05
-1.3681	-7.24027e-06	-1.3681	-1.11992e-05	-1.3681	-1.78609e-05
-1.36566	-7.14567e-06	-1.36566	-1.10649e-05	-1.36566	-1.76381e-05
-1.36322	-7.06327e-06	-1.36322	-1.09398e-05	-1.36322	-1.74275e-05
-1.36078	-6.98393e-06	-1.36078	-1.08146e-05	-1.36078	-1.7217e-05
-1.35834	-6.89542e-06	-1.35834	-1.06956e-05	-1.35834	-1.70095e-05
-1.3559	-6.80998e-06	-1.3559	-1.05735e-05	-1.3559	-1.68019e-05
-1.35345	-6.73063e-06	-1.35345	-1.04606e-05	-1.35345	-1.66066e-05
-1.35101	-6.65434e-06	-1.35101	-1.03447e-05	-1.35101	-1.64052e-05
-1.34857	-6.58109e-06	-1.34857	-1.02348e-05	-1.34857	-1.6216e-05
-1.34613	-6.5048e-06	-1.34613	-1.01158e-05	-1.34613	-1.60207e-05
-1.34369	-6.43156e-06	-1.34369	-1.0012e-05	-1.34369	-1.58345e-05
-1.34125	-6.36137e-06	-1.34125	-9.89911e-06	-1.34125	-1.56514e-05
-1.33881	-6.28812e-06	-1.33881	-9.78924e-06	-1.33881	-1.54683e-05
-1.33636	-6.21793e-06	-1.33636	-9.67938e-06	-1.33636	-1.52883e-05
-1.33392	-6.15385e-06	-1.33392	-9.57257e-06	-1.33392	-1.51174e-05
-1.33148	-6.08671e-06	-1.33148	-9.46881e-06	-1.33148	-1.49434e-05
-1.32904	-6.02262e-06	-1.32904	-9.3681e-06	-1.32904	-1.47756e-05
-1.3266	-5.95853e-06	-1.3266	-9.26434e-06	-1.3266	-1.46047e-05
-1.32416	-5.89445e-06	-1.32416	-9.16363e-06	-1.32416	-1.44368e-05
-1.32172	-5.83646e-06	-1.32172	-9.06598e-06	-1.32172	-1.4272e-05
-1.31927	-5.78458e-06	-1.31927	-8.96832e-06	-1.31927	-1.41103e-05
-1.31683	-5.72965e-06	-1.31683	-8.87066e-06	-1.31683	-1.39485e-05
-1.31439	-5.67167e-06	-1.31439	-8.77301e-06	-1.31439	-1.37898e-05
-1.31195	-5.60758e-06	-1.31195	-8.6784e-06	-1.31195	-1.36342e-05
-1.30951	-5.55265e-06	-1.30951	-8.58685e-06	-1.30951	-1.34877e-05
-1.30707	-5.50077e-06	-1.30707	-8.49225e-06	-1.30707	-1.33351e-05
-1.30463	-5.45194e-06	-1.30463	-8.40374e-06	-1.30463	-1.31887e-05
-1.30219	-5.40006e-06	-1.30219	-8.31219e-06	-1.30219	-1.30391e-05
-1.29974	-5.34818e-06	-1.29974	-8.22369e-06	-1.29974	-1.28987e-05
-1.2973	-5.29325e-06	-1.2973	-8.13519e-06	-1.2973	-1.27522e-05
-1.29486	-5.24137e-06	-1.29486	-8.05279e-06	-1.29486	-1.26119e-05
-1.29242	-5.1956e-06	-1.29242	-7.96429e-06	-1.29242	-1.24715e-05
-1.28998	-5.15897e-06	-1.28998	-7.88189e-06	-1.28998	-1.23342e-05
-1.28754	-5.11625e-06	-1.28754	-7.7995e-06	-1.28754	-1.21999e-05
-1.2851	-5.07353e-06	-1.2851	-7.7171e-06	-1.2851	-1.20687e-05
-1.28265	-5.02836e-06	-1.28265	-7.63775e-06	-1.28265	-1.19374e-05
-1.28021	-4.98533e-06	-1.28021	-7.55536e-06	-1.28021	-1.18062e-05
-1.27777	-4.93986e-06	-1.27777	-7.47601e-06	-1.27777	-1.1675e-05
-1.27533	-4.89591e-06	-1.27533	-7.39666e-06	-1.27533	-1.15499e-05
-1.27289	-4.84953e-06	-1.27289	-7.31732e-06	-1.27289	-1.14186e-05
-1.27045	-4.80833e-06	-1.27045	-7.24408e-06	-1.27045	-1.12966e-05
-1.26801	-4.76408e-06	-1.26801	-7.16473e-06	-1.26801	-1.11714e-05
-1.26556	-4.72257e-06	-1.26556	-7.09149e-06	-1.26556	-1.10524e-05
-1.26312	-4.68137e-06	-1.26312	-7.01825e-06	-1.26312	-1.09303e-05
-1.26068	-4.64018e-06	-1.26068	-6.94195e-06	-1.26068	-1.08113e-05
-1.25824	-4.60233e-06	-1.25824	-6.86566e-06	-1.25824	-1.06893e-05
-1.2558	-4.56663e-06	-1.2558	-6.79242e-06	-1.2558	-1.05763e-05
-1.25336	-4.52848e-06	-1.25336	-6.71917e-06	-1.25336	-1.04573e-05
-1.25092	-4.49125e-06	-1.25092	-6.64898e-06	-1.25092	-1.03444e-05
-1.24847	-4.45646e-06	-1.24847	-6.57879e-06	-1.24847	-1.02315e-05
-1.24603	-4.41984e-06	-1.24603	-6.5086e-06	-1.24603	-1.01216e-05
-1.24359	-4.38596e-06	-1.24359	-6.43841e-06	-1.24359	-1.00118e-05
-1.24115	-4.34934e-06	-1.24115	-6.37127e-06	-1.24115	-9.89886e-06
-1.23871	-4.31394e-06	-1.23871	-6.30108e-06	-1.23871	-9.78899e-06
-1.23627	-4.27976e-06	-1.23627	-6.237e-06	-1.23627	-9.68218e-06
-1.23383	-4.24467e-06	-1.23383	-6.16986e-06	-1.23383	-9.57232e-06
-1.23138	-4.21323e-06	-1.23138	-6.10577e-06	-1.23138	-9.46856e-06
-1.22894	-4.18028e-06	-1.22894	-6.04168e-06	-1.22894	-9.36175e-06
-1.2265	-4.14488e-06	-1.2265	-5.97455e-06	-1.2265	-9.25493e-06
-1.22406	-4.11039e-06	-1.22406	-5.91656e-06	-1.22406	-9.15423e-06
-1.22162	-4.07652e-06	-1.22162	-5.85248e-06	-1.22162	-9.05047e-06
-1.21918	-4.04386e-06	-1.21918	-5.78839e-06	-1.21918	-8.94671e-06
-1.21674	-4.0109e-06	-1.21674	-5.7304e-06	-1.21674	-8.84905e-06
-1.21429	-3.98161e-06	-1.21429	-5.66632e-06	-1.21429	-8.74529e-06
-1.21185	-3.95597e-06	-1.21185	-5.61139e-06	-1.21185	-8.64763e-06
-1.20941	-3.92912e-06	-1.20941	-5.55035e-06	-1.20941	-8.54693e-06
-1.20697	-3.90287e-06	-1.20697	-5.48932e-06	-1.20697	-8.44927e-06
-1.20453	-3.87418e-06	-1.20453	-5.42828e-06	-1.20453	-8.35161e-06
-1.20209	-3.84885e-06	-1.20209	-5.37335e-06	-1.20209	-8.25091e-06
-1.19965	-3.82353e-06	-1.19965	-5.31231e-06	-1.19965	-8.15325e-06
-1.1972	-3.79881e-06	-1.1972	-5.25433e-06	-1.1972	-8.0617e-06
-1.19476	-3.77042e-06	-1.19476	-5.1994e-06	-1.19476	-7.96099e-06
-1.19232	-3.74601e-06	-1.19232	-5.14691e-06	-1.19232	-7.86638e-06
-1.18988	-3.71854e-06	-1.18988	-5.08557e-06	-1.18988	-7.76873e-06
-1.18744	-3.69383e-06	-1.18744	-5.02911e-06	-1.18744	-7.67718e-06
-1.185	-3.66972e-06	-1.185	-4.97418e-06	-1.185	-7.58257e-06
-1.18256	-3.64378e-06	-1.18256	-4.91772e-06	-1.18256	-7.48797e-06
-1.18011	-3.6218e-06	-1.18011	-4.86279e-06	-1.18011	-7.39641e-06
-1.17767	-3.59831e-06	-1.17767	-4.80908e-06	-1.17767	-7.30791e-06
-1.17523	-3.57481e-06	-1.17523	-4.75567e-06	-1.17523	-7.21331e-06
-1.17279	-3.55253e-06	-1.17279	-4.70288e-06	-1.17279	-7.12481e-06
-1.17035	-3.53361e-06	-1.17035	-4.64764e-06	-1.17035	-7.03325e-06
-1.16791	-3.51103e-06	-1.16791	-4.59607e-06	-1.16791	-6.94475e-06
-1.16547	-3.48966e-06	-1.16547	-4.54297e-06	-1.16547	-6.85625e-06
-1.16302	-3.46922e-06	-1.16302	-4.49231e-06	-1.16302	-6.76775e-06
-1.16058	-3.44724e-06	-1.16058	-4.43829e-06	-1.16058	-6.6823e-06
-1.15814	-3.42497e-06	-1.15814	-4.39068e-06	-1.15814	-6.59685e-06
-1.1557	-3.40574e-06	-1.1557	-4.33819e-06	-1.1557	-6.50835e-06
-1.15326	-3.38224e-06	-1.15326	-4.28753e-06	-1.15326	-6.42595e-06
-1.15082	-3.36088e-06	-1.15082	-4.23626e-06	-1.15082	-6.33745e-06
-1.14838	-3.34135e-06	-1.14838	-4.18683e-06	-1.14838	-6.25506e-06
-1.14594	-3.3209e-06	-1.14594	-4.13708e-06	-1.14594	-6.17266e-06
-1.14349	-3.30442e-06	-1.14349	-4.08734e-06	-1.14349	-6.08721e-06
-1.14105	-3.28153e-06	-1.14105	-4.03882e-06	-1.14105	-6.00176e-06
-1.13861	-3.26261e-06	-1.13861	-3.99182e-06	-1.13861	-5.92241e-06
-1.13617	-3.24278e-06	-1.13617	-3.9433e-06	-1.13617	-5.84002e-06
-1.13373	-3.22263e-06	-1.13373	-3.89813e-06	-1.13373	-5.76067e-06
-1.13129	-3.20371e-06	-1.13129	-3.85083e-06	-1.13129	-5.67827e-06
-1.12885	-3.18479e-06	-1.12885	-3.80566e-06	-1.12885	-5.60198e-06
-1.1264	-3.16709e-06	-1.1264	-3.75805e-06	-1.1264	-5.51958e-06
-1.12396	-3.14817e-06	-1.12396	-3.71258e-06	-1.12396	-5.44329e-06
-1.12152	-3.12803e-06	-1.12152	-3.66864e-06	-1.12152	-5.36089e-06
-1.11908	-3.10911e-06	-1.11908	-3.62652e-06	-1.11908	-5.2846e-06
-1.11664	-3.08958e-06	-1.11664	-3.58166e-06	-1.11664	-5.2083e-06
-1.1142	-3.07096e-06	-1.1142	-3.54168e-06	-1.1142	-5.13506e-06
-1.11176	-3.05021e-06	-1.11176	-3.49804e-06	-1.11176	-5.06426e-06
-1.10931	-3.03159e-06	-1.10931	-3.4544e-06	-1.10931	-4.9901e-06
-1.10687	-3.01847e-06	-1.10687	-3.41382e-06	-1.10687	-4.91381e-06
-1.10443	-2.99955e-06	-1.10443	-3.37201e-06	-1.10443	-4.8424e-06
-1.10199	-2.98307e-06	-1.10199	-3.33294e-06	-1.10199	-4.76916e-06
-1.09955	-2.96842e-06	-1.09955	-3.29205e-06	-1.09955	-4.7011e-06
-1.09711	-2.95347e-06	-1.09711	-3.25238e-06	-1.09711	-4.62939e-06
-1.09467	-2.93821e-06	-1.09467	-3.2127e-06	-1.09467	-4.56103e-06
-1.09222	-2.9202e-06	-1.09222	-3.17303e-06	-1.09222	-4.49175e-06
-1.08978	-2.90678e-06	-1.08978	-3.1355e-06	-1.08978	-4.42553e-06
-1.08734	-2.89152e-06	-1.08734	-3.09765e-06	-1.08734	-4.35869e-06
-1.0849	-2.87626e-06	-1.0849	-3.06164e-06	-1.0849	-4.29247e-06
-1.08246	-2.85642e-06	-1.08246	-3.0235e-06	-1.08246	-4.22533e-06
-1.08002	-2.8433e-06	-1.08002	-2.98748e-06	-1.08002	-4.16247e-06
-1.07758	-2.82804e-06	-1.07758	-2.94964e-06	-1.07758	-4.09838e-06
-1.07513	-2.81431e-06	-1.07513	-2.91424e-06	-1.07513	-4.03673e-06
-1.07269	-2.80088e-06	-1.07269	-2.87854e-06	-1.07269	-3.97356e-06
-1.07025	-2.78471e-06	-1.07025	-2.84558e-06	-1.07025	-3.91497e-06
-1.06781	-2.77036e-06	-1.06781	-2.81018e-06	-1.06781	-3.85699e-06
-1.06537	-2.75572e-06	-1.06537	-2.776e-06	-1.06537	-3.79931e-06
-1.06293	-2.74198e-06	-1.06293	-2.74029e-06	-1.06293	-3.7401e-06
-1.06049	-2.72916e-06	-1.06049	-2.70947e-06	-1.06049	-3.68487e-06
-1.05804	-2.71635e-06	-1.05804	-2.67743e-06	-1.05804	-3.62993e-06
-1.0556	-2.70292e-06	-1.0556	-2.6463e-06	-1.0556	-3.575e-06
-1.05316	-2.68919e-06	-1.05316	-2.61334e-06	-1.05316	-3.52068e-06
-1.05072	-2.6782e-06	-1.05072	-2.58374e-06	-1.05072	-3.46758e-06
-1.04828	-2.66599e-06	-1.04828	-2.55444e-06	-1.04828	-3.41784e-06
-1.04584	-2.65348e-06	-1.04584	-2.52514e-06	-1.04584	-3.36352e-06
-1.0434	-2.6367e-06	-1.0434	-2.49737e-06	-1.0434	-3.31042e-06
-1.04095	-2.62327e-06	-1.04095	-2.46747e-06	-1.04095	-3.26098e-06
-1.03851	-2.60832e-06	-1.03851	-2.43725e-06	-1.03851	-3.21123e-06
-1.03607	-2.59519e-06	-1.03607	-2.41162e-06	-1.03607	-3.16118e-06
-1.03363	-2.58207e-06	-1.03363	-2.38385e-06	-1.03363	-3.11114e-06
-1.03119	-2.56925e-06	-1.03119	-2.35913e-06	-1.03119	-3.06414e-06
-1.02875	-2.55582e-06	-1.02875	-2.33258e-06	-1.02875	-3.01592e-06
-1.02631	-2.54484e-06	-1.02631	-2.30511e-06	-1.02631	-2.96862e-06
-1.02386	-2.52927e-06	-1.02386	-2.28039e-06	-1.02386	-2.92162e-06
-1.02142	-2.51707e-06	-1.02142	-2.25476e-06	-1.02142	-2.87798e-06
-1.01898	-2.50425e-06	-1.01898	-2.2279e-06	-1.01898	-2.83282e-06
-1.01654	-2.49021e-06	-1.01654	-2.20532e-06	-1.01654	-2.78856e-06
-1.0141	-2.47678e-06	-1.0141	-2.17999e-06	-1.0141	-2.7437e-06
-1.01166	-2.46244e-06	-1.01166	-2.15771e-06	-1.01166	-2.70159e-06
-1.00922	-2.44901e-06	-1.00922	-2.1336e-06	-1.00922	-2.65887e-06
-1.00677	-2.43894e-06	-1.00677	-2.11102e-06	-1.00677	-2.61675e-06
-1.00433	-2.42551e-06	-1.00433	-2.08813e-06	-1.00433	-2.57525e-06
-1.00189	-2.41392e-06	-1.00189	-2.06616e-06	-1.00189	-2.53618e-06
-0.99945	-2.4011e-06	-0.99945	-2.04358e-06	-0.99945	-2.49438e-06
-0.99701	-2.38981e-06	-0.99701	-2.02313e-06	-0.99701	-2.45592e-06
-0.99457	-2.3773e-06	-0.99457	-1.99963e-06	-0.99457	-2.41656e-06
-0.99213	-2.3657e-06	-0.99213	-1.98071e-06	-0.99213	-2.37902e-06
-0.98969	-2.3538e-06	-0.98969	-1.95843e-06	-0.98969	-2.3424e-06
-0.98724	-2.34556e-06	-0.98724	-1.93799e-06	-0.98724	-2.30639e-06
-0.9848	-2.33579e-06	-0.9848	-1.91784e-06	-0.9848	-2.26946e-06
-0.98236	-2.3245e-06	-0.98236	-1.89953e-06	-0.98236	-2.23559e-06
-0.97992	-2.3129e-06	-0.97992	-1.87939e-06	-0.97992	-2.19897e-06
-0.97748	-2.30192e-06	-0.97748	-1.85956e-06	-0.97748	-2.16662e-06
-0.97504	-2.29063e-06	-0.97504	-1.84033e-06	-0.97504	-2.13305e-06
-0.9726	-2.28117e-06	-0.9726	-1.8208e-06	-0.9726	-2.09948e-06
-0.97015	-2.27201e-06	-0.97015	-1.80127e-06	-0.97015	-2.06682e-06
-0.96771	-2.26133e-06	-0.96771	-1.78204e-06	-0.96771	-2.03692e-06
-0.96527	-2.24973e-06	-0.96527	-1.76434e-06	-0.96527	-2.00457e-06
-0.96283	-2.23753e-06	-0.96283	-1.74725e-06	-0.96283	-1.97375e-06
-0.96039	-2.22471e-06	-0.96039	-1.72619e-06	-0.96039	-1.94292e-06
-0.95795	-2.21433e-06	-0.95795	-1.71277e-06	-0.95795	-1.91454e-06
-0.95551	-2.20274e-06	-0.95551	-1.69476e-06	-0.95551	-1.88494e-06
-0.95306	-2.19297e-06	-0.95306	-1.67706e-06	-0.95306	-1.85595e-06
-0.95062	-2.18137e-06	-0.95062	-1.66058e-06	-0.95062	-1.82757e-06
-0.94818	-2.17191e-06	-0.94818	-1.64563e-06	-0.94818	-1.79949e-06
-0.94574	-2.16306e-06	-0.94574	-1.63098e-06	-0.94574	-1.77355e-06
-0.9433	-2.15238e-06	-0.9433	-1.6145e-06	-0.9433	-1.74639e-06
-0.94086	-2.1417e-06	-0.94086	-1.59832e-06	-0.94086	-1.71831e-06
-0.93842	-2.13316e-06	-0.93842	-1.58337e-06	-0.93842	-1.69481e-06
-0.93597	-2.12492e-06	-0.93597	-1.56811e-06	-0.93597	-1.66887e-06
-0.93353	-2.1124e-06	-0.93353	-1.55468e-06	-0.93353	-1.64263e-06
-0.93109	-2.10294e-06	-0.93109	-1.53851e-06	-0.93109	-1.61822e-06
-0.92865	-2.09104e-06	-0.92865	-1.52447e-06	-0.92865	-1.5938e-06
-0.92621	-2.0825e-06	-0.92621	-1.51165e-06	-0.92621	-1.57e-06
-0.92377	-2.07304e-06	-0.92377	-1.49762e-06	-0.92377	-1.54711e-06
-0.92133	-2.06144e-06	-0.92133	-1.48266e-06	-0.92133	-1.52239e-06
-0.91888	-2.04954e-06	-0.91888	-1.47046e-06	-0.91888	-1.50072e-06
-0.91644	-2.0416e-06	-0.91644	-1.45642e-06	-0.91644	-1.47906e-06
-0.914	-2.03275e-06	-0.914	-1.4433e-06	-0.914	-1.45922e-06
-0.91156	-2.02299e-06	-0.91156	-1.42956e-06	-0.91156	-1.43633e-06
-0.90912	-2.01414e-06	-0.90912	-1.41675e-06	-0.90912	-1.41527e-06
-0.90668	-2.00376e-06	-0.90668	-1.40332e-06	-0.90668	-1.39483e-06
-0.90424	-1.99339e-06	-0.90424	-1.39233e-06	-0.90424	-1.37621e-06
-0.90179	-1.98393e-06	-0.90179	-1.38165e-06	-0.90179	-1.35424e-06
-0.89935	-1.97324e-06	-0.89935	-1.36792e-06	-0.89935	-1.33654e-06
-0.89691	-1.96409e-06	-0.89691	-1.35663e-06	-0.89691	-1.3164e-06
-0.89447	-1.95402e-06	-0.89447	-1.34625e-06	-0.89447	-1.29778e-06
-0.89203	-1.94364e-06	-0.89203	-1.33404e-06	-0.89203	-1.28039e-06
-0.88959	-1.93601e-06	-0.88959	-1.32214e-06	-0.88959	-1.26238e-06
-0.88715	-1.92655e-06	-0.88715	-1.30993e-06	-0.88715	-1.24346e-06
-0.8847	-1.91465e-06	-0.8847	-1.29986e-06	-0.8847	-1.22698e-06
-0.88226	-1.90458e-06	-0.88226	-1.28827e-06	-0.88226	-1.20959e-06
-0.87982	-1.89542e-06	-0.87982	-1.2782e-06	-0.87982	-1.19402e-06
-0.87738	-1.88657e-06	-0.87738	-1.26721e-06	-0.87738	-1.17846e-06
-0.87494	-1.87711e-06	-0.87494	-1.25653e-06	-0.87494	-1.16167e-06
-0.8725	-1.86491e-06	-0.8725	-1.24707e-06	-0.8725	-1.14611e-06
-0.87006	-1.85697e-06	-0.87006	-1.23517e-06	-0.87006	-1.12963e-06
-0.86761	-1.84751e-06	-0.86761	-1.22693e-06	-0.86761	-1.11315e-06
-0.86517	-1.83927e-06	-0.86517	-1.21685e-06	-0.86517	-1.10033e-06
-0.86273	-1.83042e-06	-0.86273	-1.20617e-06	-0.86273	-1.08416e-06
-0.86029	-1.82127e-06	-0.86029	-1.19854e-06	-0.86029	-1.07226e-06
-0.85785	-1.81211e-06	-0.85785	-1.18908e-06	-0.85785	-1.057e-06
-0.85541	-1.80082e-06	-0.85541	-1.17871e-06	-0.85541	-1.04143e-06
-0.85297	-1.7935e-06	-0.85297	-1.17138e-06	-0.85297	-1.02679e-06
-0.85052	-1.78373e-06	-0.85052	-1.16162e-06	-0.85052	-1.01458e-06
-0.84808	-1.77488e-06	-0.84808	-1.15155e-06	-0.84808	-1.00359e-06
-0.84564	-1.76725e-06	-0.84564	-1.14514e-06	-0.84564	-9.89248e-07
-0.8432	-1.75687e-06	-0.8432	-1.13415e-06	-0.8432	-9.76126e-07
-0.84076	-1.74802e-06	-0.84076	-1.12683e-06	-0.84076	-9.65445e-07
-0.83832	-1.73612e-06	-0.83832	-1.1195e-06	-0.83832	-9.51407e-07
-0.83588	-1.7291e-06	-0.83588	-1.11187e-06	-0.83588	-9.4042e-07
-0.83344	-1.71934e-06	-0.83344	-1.10516e-06	-0.83344	-9.28518e-07
-0.83099	-1.71018e-06	-0.83099	-1.09631e-06	-0.83099	-9.17227e-07
-0.82855	-1.70194e-06	-0.82855	-1.08899e-06	-0.82855	-9.06546e-07
-0.82611	-1.69309e-06	-0.82611	-1.08227e-06	-0.82611	-8.95559e-07
-0.82367	-1.68302e-06	-0.82367	-1.07159e-06	-0.82367	-8.81827e-07
-0.82123	-1.67356e-06	-0.82123	-1.06884e-06	-0.82123	-8.72671e-07
-0.81879	-1.6638e-06	-0.81879	-1.05877e-06	-0.81879	-8.6138e-07
-0.81635	-1.658e-06	-0.81635	-1.05298e-06	-0.81635	-8.51004e-07
-0.8139	-1.64793e-06	-0.8139	-1.04687e-06	-0.8139	-8.39407e-07
-0.81146	-1.63938e-06	-0.81146	-1.03985e-06	-0.81146	-8.30557e-07
-0.80902	-1.62901e-06	-0.80902	-1.03253e-06	-0.80902	-8.19876e-07
-0.80658	-1.62077e-06	-0.80658	-1.02734e-06	-0.80658	-8.10415e-07
-0.80414	-1.61222e-06	-0.80414	-1.02063e-06	-0.80414	-7.98514e-07
-0.8017	-1.6052e-06	-0.8017	-1.01544e-06	-0.8017	-7.89541e-07
-0.79926	-1.59635e-06	-0.79926	-1.00842e-06	-0.79926	-7.7944e-07
-0.79681	-1.5875e-06	-0.79681	-1.00323e-06	-0.79681	-7.72421e-07
-0.79437	-1.57926e-06	-0.79437	-9.96213e-07	-0.79437	-7.62076e-07
-0.79193	-1.57072e-06	-0.79193	-9.90415e-07	-0.79193	-7.52981e-07
-0.78949	-1.56217e-06	-0.78949	-9.84921e-07	-0.78949	-7.43918e-07
-0.78705	-1.55454e-06	-0.78705	-9.78818e-07	-0.78705	-7.35525e-07
-0.78461	-1.546e-06	-0.78461	-9.7302e-07	-0.78461	-7.27286e-07
-0.78217	-1.53776e-06	-0.78217	-9.68442e-07	-0.78217	-7.17764e-07
-0.77972	-1.52982e-06	-0.77972	-9.63254e-07	-0.77972	-7.08639e-07
-0.77728	-1.52036e-06	-0.77728	-9.57456e-07	-0.77728	-7.00674e-07
-0.77484	-1.51151e-06	-0.77484	-9.51352e-07	-0.77484	-6.92312e-07
-0.7724	-1.50358e-06	-0.7724	-9.44638e-07	-0.7724	-6.84225e-07
-0.76996	-1.49595e-06	-0.76996	-9.40061e-07	-0.76996	-6.76321e-07
-0.76752	-1.48771e-06	-0.76752	-9.34567e-07	-0.76752	-6.6915e-07
-0.76508	-1.47825e-06	-0.76508	-9.29074e-07	-0.76508	-6.59079e-07
-0.76263	-1.4697e-06	-0.76263	-9.26022e-07	-0.76263	-6.52579e-07
-0.76019	-1.46299e-06	-0.76019	-9.19919e-07	-0.76019	-6.44735e-07
-0.75775	-1.45536e-06	-0.75775	-9.16867e-07	-0.75775	-6.37655e-07
-0.75531	-1.44743e-06	-0.75531	-9.09238e-07	-0.75531	-6.32284e-07
-0.75287	-1.44102e-06	-0.75287	-9.05881e-07	-0.75287	-6.24258e-07
-0.75043	-1.43217e-06	-0.75043	-8.98557e-07	-0.75043	-6.15988e-07
-0.74799	-1.42454e-06	-0.74799	-8.96726e-07	-0.74799	-6.12021e-07
-0.74554	-1.4163e-06	-0.74554	-8.91538e-07	-0.74554	-6.05032e-07
-0.7431	-1.40775e-06	-0.7431	-8.8757e-07	-0.7431	-5.98593e-07
-0.74066	-1.39921e-06	-0.74066	-8.83908e-07	-0.74066	-5.92398e-07
-0.73822	-1.39097e-06	-0.73822	-8.78415e-07	-0.73822	-5.86142e-07
-0.73578	-1.38334e-06	-0.73578	-8.75668e-07	-0.73578	-5.81259e-07
-0.73334	-1.37571e-06	-0.73334	-8.6987e-07	-0.73334	-5.75979e-07
-0.7309	-1.36778e-06	-0.7309	-8.66818e-07	-0.7309	-5.70608e-07
-0.72845	-1.35984e-06	-0.72845	-8.62851e-07	-0.72845	-5.65481e-07
-0.72601	-1.35282e-06	-0.72601	-8.59372e-07	-0.72601	-5.59836e-07
-0.72357	-1.3455e-06	-0.72357	-8.551e-07	-0.72357	-5.5422e-07
-0.72113	-1.33848e-06	-0.72113	-8.50797e-07	-0.72113	-5.49856e-07
-0.71869	-1.33146e-06	-0.71869	-8.4924e-07	-0.71869	-5.45401e-07
-0.71625	-1.32444e-06	-0.71625	-8.46402e-07	-0.71625	-5.40793e-07
-0.71381	-1.31437e-06	-0.71381	-8.41824e-07	-0.71381	-5.3472e-07
-0.71136	-1.30735e-06	-0.71136	-8.39841e-07	-0.71136	-5.29287e-07
-0.70892	-1.29911e-06	-0.70892	-8.37521e-07	-0.70892	-5.26358e-07
-0.70648	-1.29118e-06	-0.70648	-8.33005e-07	-0.70648	-5.21628e-07
-0.70404	-1.28294e-06	-0.70404	-8.29831e-07	-0.70404	-5.17416e-07
-0.7016	-1.27561e-06	-0.7016	-8.26932e-07	-0.7016	-5.10824e-07
-0.69916	-1.26707e-06	-0.69916	-8.22446e-07	-0.69916	-5.06003e-07
-0.69672	-1.25791e-06	-0.69672	-8.20889e-07	-0.69672	-5.04416e-07
-0.69427	-1.2515e-06	-0.69427	-8.18356e-07	-0.69427	-4.97915e-07
-0.69183	-1.24357e-06	-0.69183	-8.15518e-07	-0.69183	-4.94742e-07
-0.68939	-1.23808e-06	-0.68939	-8.12955e-07	-0.68939	-4.89737e-07
-0.68695	-1.23045e-06	-0.68695	-8.09262e-07	-0.68695	-4.85769e-07
-0.68451	-1.22312e-06	-0.68451	-8.08469e-07	-0.68451	-4.80704e-07
-0.68207	-1.2161e-06	-0.68207	-8.04379e-07	-0.68207	-4.7872e-07
-0.67963	-1.20817e-06	-0.67963	-8.02152e-07	-0.67963	-4.74692e-07
-0.67719	-1.20268e-06	-0.67719	-7.97635e-07	-0.67719	-4.70694e-07
-0.67474	-1.19657e-06	-0.67474	-7.95072e-07	-0.67474	-4.67734e-07
-0.6723	-1.1865e-06	-0.6723	-7.93057e-07	-0.6723	-4.65109e-07
-0.66986	-1.1804e-06	-0.66986	-7.90158e-07	-0.66986	-4.61538e-07
-0.66742	-1.17307e-06	-0.66742	-7.87229e-07	-0.66742	-4.58944e-07
-0.66498	-1.16422e-06	-0.66498	-7.8378e-07	-0.66498	-4.56259e-07
-0.66254	-1.1569e-06	-0.66254	-7.80881e-07	-0.66254	-4.52871e-07
-0.6601	-1.1508e-06	-0.6601	-7.77768e-07	-0.6601	-4.49637e-07
-0.65765	-1.14439e-06	-0.65765	-7.74747e-07	-0.65765	-4.45273e-07
-0.65521	-1.1395e-06	-0.65521	-7.71695e-07	-0.65521	-4.44327e-07
-0.65277	-1.13218e-06	-0.65277	-7.68399e-07	-0.65277	-4.40115e-07
-0.65033	-1.12608e-06	-0.65033	-7.6489e-07	-0.65033	-4.37063e-07
-0.64789	-1.11845e-06	-0.64789	-7.60343e-07	-0.64789	-4.32791e-07
-0.64545	-1.1096e-06	-0.64545	-7.58664e-07	-0.64545	-4.31204e-07
-0.64301	-1.10288e-06	-0.64301	-7.54758e-07	-0.64301	-4.28244e-07
-0.64056	-1.09495e-06	-0.64056	-7.52011e-07	-0.64056	-4.2684e-07
-0.63812	-1.08823e-06	-0.63812	-7.47922e-07	-0.63812	-4.22995e-07
-0.63568	-1.08305e-06	-0.63568	-7.44931e-07	-0.63568	-4.20187e-07
-0.63324	-1.07542e-06	-0.63324	-7.41757e-07	-0.63324	-4.17257e-07
-0.6308	-1.06901e-06	-0.6308	-7.39316e-07	-0.6308	-4.17227e-07
-0.62836	-1.05985e-06	-0.62836	-7.35562e-07	-0.62836	-4.12893e-07
-0.62592	-1.05528e-06	-0.62592	-7.31961e-07	-0.62592	-4.10849e-07
-0.62347	-1.04856e-06	-0.62347	-7.28421e-07	-0.62347	-4.08743e-07
-0.62103	-1.04154e-06	-0.62103	-7.24759e-07	-0.62103	-4.06485e-07
-0.61859	-1.03483e-06	-0.61859	-7.23111e-07	-0.61859	-4.02304e-07
-0.61615	-1.02811e-06	-0.61615	-7.19479e-07	-0.61615	-4.00107e-07
-0.61371	-1.0214e-06	-0.61371	-7.15878e-07	-0.61371	-3.97696e-07
-0.61127	-1.0153e-06	-0.61127	-7.1246e-07	-0.61127	-3.96414e-07
-0.60883	-1.00767e-06	-0.60883	-7.10263e-07	-0.60883	-3.93637e-07
-0.60638	-1.00095e-06	-0.60638	-7.06754e-07	-0.60638	-3.91073e-07
-0.60394	-9.9424e-07	-0.60394	-7.03244e-07	-0.60394	-3.88266e-07
-0.6015	-9.88747e-07	-0.6015	-7.00803e-07	-0.6015	-3.86221e-07
-0.59906	-9.80813e-07	-0.59906	-6.96774e-07	-0.59906	-3.85916e-07
-0.59662	-9.75625e-07	-0.59662	-6.93509e-07	-0.59662	-3.82132e-07
-0.59418	-9.67385e-07	-0.59418	-6.89694e-07	-0.59418	-3.80179e-07
-0.59174	-9.60366e-07	-0.59174	-6.871e-07	-0.59174	-3.78927e-07
-0.58929	-9.53042e-07	-0.58929	-6.84781e-07	-0.58929	-3.77005e-07
-0.58685	-9.48769e-07	-0.58685	-6.8057e-07	-0.58685	-3.74502e-07
-0.58441	-9.40835e-07	-0.58441	-6.80203e-07	-0.58441	-3.72366e-07
-0.58197	-9.34426e-07	-0.58197	-6.75809e-07	-0.58197	-3.7084e-07
-0.57953	-9.27407e-07	-0.57953	-6.71475e-07	-0.57953	-3.69009e-07
-0.57709	-9.22524e-07	-0.57709	-6.68118e-07	-0.57709	-3.67178e-07
-0.57465	-9.1581e-07	-0.57465	-6.6586e-07	-0.57465	-3.6669e-07
-0.5722	-9.08791e-07	-0.5722	-6.62534e-07	-0.5722	-3.64371e-07
-0.56976	-9.00857e-07	-0.56976	-6.59512e-07	-0.56976	-3.60891e-07
-0.56732	-8.95058e-07	-0.56732	-6.56461e-07	-0.56732	-3.60342e-07
-0.56488	-8.88344e-07	-0.56488	-6.52677e-07	-0.56488	-3.58145e-07
-0.56244	-8.81631e-07	-0.56244	-6.50571e-07	-0.56244	-3.55856e-07
-0.56	-8.74917e-07	-0.56	-6.48587e-07	-0.56	-3.56283e-07
-0.55756	-8.68813e-07	-0.55756	-6.44834e-07	-0.55756	-3.52621e-07
-0.55511	-8.60573e-07	-0.55511	-6.42484e-07	-0.55511	-3.51462e-07
-0.55267	-8.56301e-07	-0.55267	-6.40927e-07	-0.55267	-3.50375e-07
-0.55023	-8.47451e-07	-0.55023	-6.37814e-07	-0.55023	-3.48257e-07
-0.54779	-8.42568e-07	-0.54779	-6.35281e-07	-0.54779	-3.47708e-07
-0.54535	-8.35854e-07	-0.54535	-6.32199e-07	-0.54535	-3.44317e-07
-0.54291	-8.2914e-07	-0.54291	-6.28262e-07	-0.54291	-3.42529e-07
-0.54047	-8.21816e-07	-0.54047	-6.26096e-07	-0.54047	-3.41702e-07
-0.53802	-8.14492e-07	-0.53802	-6.24112e-07	-0.53802	-3.38095e-07
-0.53558	-8.08999e-07	-0.53558	-6.20755e-07	-0.53558	-3.37698e-07
-0.53314	-8.00149e-07	-0.53314	-6.18375e-07	-0.53314	-3.36172e-07
-0.5307	-7.94045e-07	-0.5307	-6.16391e-07	-0.5307	-3.34311e-07
-0.52826	-7.88552e-07	-0.52826	-6.13065e-07	-0.52826	-3.32297e-07
-0.52582	-7.82448e-07	-0.52582	-6.10837e-07	-0.52582	-3.2984e-07
-0.52338	-7.75735e-07	-0.52338	-6.08792e-07	-0.52338	-3.29001e-07
-0.52094	-7.68715e-07	-0.52094	-6.04978e-07	-0.52094	-3.27902e-07
-0.51849	-7.63222e-07	-0.51849	-6.01865e-07	-0.51849	-3.24606e-07
-0.51605	-7.55898e-07	-0.51605	-6.0159e-07	-0.51605	-3.2424e-07
-0.51361	-7.49184e-07	-0.51361	-5.9747e-07	-0.51361	-3.22806e-07
-0.51117	-7.43996e-07	-0.51117	-5.96463e-07	-0.51117	-3.20975e-07
-0.50873	-7.35757e-07	-0.50873	-5.94144e-07	-0.50873	-3.18808e-07
-0.50629	-7.30874e-07	-0.50629	-5.91947e-07	-0.50629	-3.16275e-07
-0.50385	-7.24099e-07	-0.50385	-5.90177e-07	-0.50385	-3.14902e-07
-0.5014	-7.16103e-07	-0.5014	-5.87186e-07	-0.5014	-3.12826e-07
-0.49896	-7.09115e-07	-0.49896	-5.84317e-07	-0.49896	-3.10507e-07
-0.49652	-7.01943e-07	-0.49652	-5.82242e-07	-0.49652	-3.08645e-07
-0.49408	-6.95687e-07	-0.49408	-5.80502e-07	-0.49408	-3.08157e-07
-0.49164	-6.88637e-07	-0.49164	-5.79465e-07	-0.49164	-3.04495e-07
-0.4892	-6.82198e-07	-0.4892	-5.76444e-07	-0.4892	-3.04251e-07
-0.48676	-6.76705e-07	-0.48676	-5.74735e-07	-0.48676	-3.01291e-07
-0.48431	-6.70663e-07	-0.48431	-5.71591e-07	-0.48431	-3.01199e-07
-0.48187	-6.63216e-07	-0.48187	-5.70432e-07	-0.48187	-2.98422e-07
-0.47943	-6.56869e-07	-0.47943	-5.66007e-07	-0.47943	-2.9769e-07
-0.47699	-6.50002e-07	-0.47699	-5.63931e-07	-0.47699	-2.95981e-07
-0.47455	-6.44356e-07	-0.47455	-5.6091e-07	-0.47455	-2.9418e-07
-0.47211	-6.36757e-07	-0.47211	-5.58652e-07	-0.47211	-2.91342e-07
-0.46967	-6.30288e-07	-0.46967	-5.55264e-07	-0.46967	-2.91006e-07
-0.46722	-6.25283e-07	-0.46722	-5.52518e-07	-0.46722	-2.87985e-07
-0.46478	-6.17104e-07	-0.46478	-5.50473e-07	-0.46478	-2.86581e-07
-0.46234	-6.11001e-07	-0.46234	-5.47666e-07	-0.46234	-2.8536e-07
-0.4599	-6.04073e-07	-0.4599	-5.44431e-07	-0.4599	-2.83987e-07
-0.45746	-5.98153e-07	-0.45746	-5.42172e-07	-0.45746	-2.81149e-07
-0.45502	-5.93514e-07	-0.45502	-5.39212e-07	-0.45502	-2.79928e-07
-0.45258	-5.86983e-07	-0.45258	-5.37198e-07	-0.45258	-2.77853e-07
-0.45013	-5.79537e-07	-0.45013	-5.32773e-07	-0.45013	-2.7709e-07
-0.44769	-5.7325e-07	-0.44769	-5.31308e-07	-0.44769	-2.74649e-07
-0.44525	-5.66689e-07	-0.44525	-5.28562e-07	-0.44525	-2.73886e-07
-0.44281	-5.59548e-07	-0.44281	-5.25449e-07	-0.44281	-2.7117e-07
-0.44037	-5.53506e-07	-0.44037	-5.23282e-07	-0.44037	-2.70529e-07
-0.43793	-5.45693e-07	-0.43793	-5.20169e-07	-0.43793	-2.68149e-07
-0.43549	-5.41146e-07	-0.43549	-5.1788e-07	-0.43549	-2.66806e-07
-0.43304	-5.34157e-07	-0.43304	-5.15683e-07	-0.43304	-2.65005e-07
-0.4306	-5.27321e-07	-0.4306	-5.12174e-07	-0.4306	-2.64975e-07
-0.42816	-5.21401e-07	-0.42816	-5.09427e-07	-0.42816	-2.62076e-07
-0.42572	-5.14687e-07	-0.42572	-5.05521e-07	-0.42572	-2.60061e-07
-0.42328	-5.07973e-07	-0.42328	-5.04422e-07	-0.42328	-2.59176e-07
-0.42084	-5.02236e-07	-0.42084	-5.01492e-07	-0.42084	-2.57498e-07
-0.4184	-4.9656e-07	-0.4184	-5.00424e-07	-0.4184	-2.54843e-07
-0.41595	-4.90243e-07	-0.41595	-4.97312e-07	-0.41595	-2.54568e-07
-0.41351	-4.83712e-07	-0.41351	-4.93649e-07	-0.41351	-2.52463e-07
-0.41107	-4.78493e-07	-0.41107	-4.9075e-07	-0.41107	-2.5054e-07
-0.40863	-4.71505e-07	-0.40863	-4.88187e-07	-0.40863	-2.49441e-07
-0.40619	-4.66561e-07	-0.40619	-4.86264e-07	-0.40619	-2.47122e-07
-0.40375	-4.60274e-07	-0.40375	-4.8309e-07	-0.40375	-2.47488e-07
-0.40131	-4.56582e-07	-0.40131	-4.79886e-07	-0.40131	-2.4526e-07
-0.39886	-4.49166e-07	-0.39886	-4.78024e-07	-0.39886	-2.43979e-07
-0.39642	-4.44405e-07	-0.39642	-4.7421e-07	-0.39642	-2.41964e-07
-0.39398	-4.37783e-07	-0.39398	-4.72531e-07	-0.39398	-2.40317e-07
-0.39154	-4.33358e-07	-0.39154	-4.69602e-07	-0.39154	-2.37753e-07
-0.3891	-4.26613e-07	-0.3891	-4.67465e-07	-0.3891	-2.37173e-07
-0.38666	-4.21883e-07	-0.38666	-4.64719e-07	-0.38666	-2.35891e-07
-0.38422	-4.1581e-07	-0.38422	-4.61789e-07	-0.38422	-2.33542e-07
-0.38177	-4.10256e-07	-0.38177	-4.61484e-07	-0.38177	-2.31802e-07
-0.37933	-4.04976e-07	-0.37933	-4.57761e-07	-0.37933	-2.30154e-07
-0.37689	-4.00307e-07	-0.37689	-4.54343e-07	-0.37689	-2.29483e-07
-0.37445	-3.94417e-07	-0.37445	-4.53763e-07	-0.37445	-2.27316e-07
-0.37201	-3.9042e-07	-0.37201	-4.50681e-07	-0.37201	-2.27316e-07
-0.36957	-3.8221e-07	-0.36957	-4.49002e-07	-0.36957	-2.25027e-07
-0.36713	-3.79372e-07	-0.36713	-4.4653e-07	-0.36713	-2.23257e-07
-0.36469	-3.73452e-07	-0.36469	-4.44669e-07	-0.36469	-2.22189e-07
-0.36224	-3.68874e-07	-0.36224	-4.42838e-07	-0.36224	-2.19687e-07
-0.3598	-3.64449e-07	-0.3598	-4.41892e-07	-0.3598	-2.18283e-07
-0.35736	-3.60421e-07	-0.35736	-4.38138e-07	-0.35736	-2.16635e-07
-0.35492	-3.55233e-07	-0.35492	-4.36582e-07	-0.35492	-2.15902e-07
-0.35248	-3.49434e-07	-0.35248	-4.3472e-07	-0.35248	-2.15811e-07
-0.35004	-3.45833e-07	-0.35004	-4.3411e-07	-0.35004	-2.13705e-07
-0.3476	-3.41805e-07	-0.3476	-4.31088e-07	-0.3476	-2.11355e-07
-0.34515	-3.368e-07	-0.34515	-4.29288e-07	-0.34515	-2.10104e-07
-0.34271	-3.32497e-07	-0.34271	-4.27365e-07	-0.34271	-2.07419e-07
-0.34027	-3.28255e-07	-0.34027	-4.24161e-07	-0.34027	-2.0751e-07
-0.33783	-3.24532e-07	-0.33783	-4.21689e-07	-0.33783	-2.05984e-07
-0.33539	-3.20656e-07	-0.33539	-4.20102e-07	-0.33539	-2.04519e-07
-0.33295	-3.1614e-07	-0.33295	-4.20102e-07	-0.33295	-2.02505e-07
-0.33051	-3.11684e-07	-0.33051	-4.16593e-07	-0.33051	-2.01773e-07
-0.32806	-3.07564e-07	-0.32806	-4.15402e-07	-0.32806	-1.99545e-07
-0.32562	-3.02315e-07	-0.32562	-4.12991e-07	-0.32562	-1.9866e-07
-0.32318	-3.0021e-07	-0.32318	-4.10825e-07	-0.32318	-1.97012e-07
-0.32074	-2.95815e-07	-0.32074	-4.07834e-07	-0.32074	-1.95456e-07
-0.3183	-2.91695e-07	-0.3183	-4.0524e-07	-0.3183	-1.95883e-07
-0.31586	-2.88247e-07	-0.31586	-4.02493e-07	-0.31586	-1.91672e-07
-0.31342	-2.84188e-07	-0.31342	-4.01993e-07	-0.31342	-1.92221e-07
-0.31097	-2.80373e-07	-0.31097	-3.99381e-07	-0.31097	-1.91458e-07
-0.30853	-2.77413e-07	-0.30853	-3.96112e-07	-0.30853	-1.90024e-07
-0.30609	-2.73568e-07	-0.30609	-3.94437e-07	-0.30609	-1.87735e-07
-0.30365	-2.7018e-07	-0.30365	-3.92722e-07	-0.30365	-1.86361e-07
-0.30121	-2.66427e-07	-0.30121	-3.90347e-07	-0.30121	-1.85019e-07
-0.29877	-2.64321e-07	-0.29877	-3.88516e-07	-0.29877	-1.82821e-07
-0.29633	-2.60171e-07	-0.29633	-3.86624e-07	-0.29633	-1.82333e-07
-0.29388	-2.57699e-07	-0.29388	-3.84619e-07	-0.29388	-1.8035e-07
-0.29144	-2.5422e-07	-0.29144	-3.82041e-07	-0.29144	-1.78854e-07
-0.289	-2.51052e-07	-0.289	-3.79801e-07	-0.289	-1.79098e-07
-0.28656	-2.48208e-07	-0.28656	-3.76776e-07	-0.28656	-1.75955e-07
-0.28412	-2.45888e-07	-0.28412	-3.75058e-07	-0.28412	-1.75741e-07
-0.28168	-2.4244e-07	-0.28168	-3.72067e-07	-0.28168	-1.74765e-07
-0.27924	-2.39754e-07	-0.27924	-3.70114e-07	-0.27924	-1.7272e-07
-0.27679	-2.36367e-07	-0.27679	-3.67032e-07	-0.27679	-1.7156e-07
-0.27435	-2.34749e-07	-0.27435	-3.66055e-07	-0.27435	-1.69577e-07
-0.27191	-2.32339e-07	-0.27191	-3.62058e-07	-0.27191	-1.68265e-07
-0.26947	-2.28646e-07	-0.26947	-3.61295e-07	-0.26947	-1.66647e-07
-0.26703	-2.25564e-07	-0.26703	-3.58701e-07	-0.26703	-1.65793e-07
-0.26459	-2.22787e-07	-0.26459	-3.55039e-07	-0.26459	-1.64114e-07
-0.26215	-2.2007e-07	-0.26215	-3.52689e-07	-0.26215	-1.63199e-07
-0.2597	-2.16714e-07	-0.2597	-3.51407e-07	-0.2597	-1.60696e-07
-0.25726	-2.14242e-07	-0.25726	-3.4863e-07	-0.25726	-1.59353e-07
-0.25482	-2.11953e-07	-0.25482	-3.47226e-07	-0.25482	-1.58255e-07
-0.25238	-2.09908e-07	-0.25238	-3.42923e-07	-0.25238	-1.58041e-07
-0.24994	-2.07253e-07	-0.24994	-3.40848e-07	-0.24994	-1.56759e-07
-0.2475	-2.05056e-07	-0.2475	-3.37796e-07	-0.2475	-1.56027e-07
-0.24506	-2.01607e-07	-0.24506	-3.36301e-07	-0.24506	-1.54287e-07
-0.24261	-2.00112e-07	-0.24261	-3.35416e-07	-0.24261	-1.5151e-07
-0.24017	-1.98128e-07	-0.24017	-3.32334e-07	-0.24017	-1.4974e-07
-0.23773	-1.94802e-07	-0.23773	-3.28031e-07	-0.23773	-1.48489e-07
-0.23529	-1.9175e-07	-0.23529	-3.25803e-07	-0.23529	-1.48092e-07
-0.23285	-1.90468e-07	-0.23285	-3.23758e-07	-0.23285	-1.4675e-07
-0.23041	-1.89187e-07	-0.23041	-3.20737e-07	-0.23041	-1.46933e-07
-0.22797	-1.86837e-07	-0.22797	-3.19211e-07	-0.22797	-1.43973e-07
-0.22552	-1.85525e-07	-0.22552	-3.16983e-07	-0.22552	-1.41379e-07
-0.22308	-1.82259e-07	-0.22308	-3.14542e-07	-0.22308	-1.41226e-07
-0.22064	-1.80947e-07	-0.22064	-3.1091e-07	-0.22064	-1.4028e-07
-0.2182	-1.78658e-07	-0.2182	-3.09567e-07	-0.2182	-1.39425e-07
-0.21576	-1.76919e-07	-0.21576	-3.08652e-07	-0.21576	-1.36191e-07
-0.21332	-1.74019e-07	-0.21332	-3.05631e-07	-0.21332	-1.34634e-07
-0.21088	-1.73684e-07	-0.21088	-3.04257e-07	-0.21088	-1.33719e-07
-0.20844	-1.70907e-07	-0.20844	-3.00321e-07	-0.20844	-1.33047e-07
-0.20599	-1.68831e-07	-0.20599	-2.98917e-07	-0.20599	-1.31704e-07
-0.20355	-1.66909e-07	-0.20355	-2.95529e-07	-0.20355	-1.30423e-07
-0.20111	-1.6523e-07	-0.20111	-2.92722e-07	-0.20111	-1.29019e-07
-0.19867	-1.63705e-07	-0.19867	-2.91074e-07	-0.19867	-1.28927e-07
-0.19623	-1.62636e-07	-0.19623	-2.89212e-07	-0.19623	-1.26639e-07
-0.19379	-1.60927e-07	-0.19379	-2.86252e-07	-0.19379	-1.26059e-07
-0.19135	-1.59615e-07	-0.19135	-2.85184e-07	-0.19135	-1.23465e-07
-0.1889	-1.57509e-07	-0.1889	-2.82041e-07	-0.1889	-1.22519e-07
-0.18646	-1.55373e-07	-0.18646	-2.80026e-07	-0.18646	-1.22122e-07
-0.18402	-1.54763e-07	-0.18402	-2.75906e-07	-0.18402	-1.20749e-07
-0.18158	-1.53329e-07	-0.18158	-2.74411e-07	-0.18158	-1.19467e-07
-0.17914	-1.51894e-07	-0.17914	-2.72458e-07	-0.17914	-1.17148e-07
-0.1767	-1.51162e-07	-0.1767	-2.69284e-07	-0.1767	-1.16903e-07
-0.17426	-1.49575e-07	-0.17426	-2.6727e-07	-0.17426	-1.15774e-07
-0.17181	-1.49148e-07	-0.17181	-2.63364e-07	-0.17181	-1.1434e-07
-0.16937	-1.4695e-07	-0.16937	-2.62235e-07	-0.16937	-1.12662e-07
-0.16693	-1.45241e-07	-0.16693	-2.6077e-07	-0.16693	-1.11532e-07
-0.16449	-1.43502e-07	-0.16449	-2.56497e-07	-0.16449	-1.10098e-07
-0.16205	-1.41122e-07	-0.16205	-2.54758e-07	-0.16205	-1.08725e-07
-0.15961	-1.39809e-07	-0.15961	-2.50211e-07	-0.15961	-1.0726e-07
-0.15717	-1.38833e-07	-0.15717	-2.49753e-07	-0.15717	-1.06253e-07
-0.15472	-1.37429e-07	-0.15472	-2.47861e-07	-0.15472	-1.05704e-07
-0.15228	-1.37246e-07	-0.15228	-2.4603e-07	-0.15228	-1.03048e-07
-0.14984	-1.34743e-07	-0.14984	-2.42734e-07	-0.14984	-1.02011e-07
-0.1474	-1.34286e-07	-0.1474	-2.39072e-07	-0.1474	-1.00943e-07
-0.14496	-1.32241e-07	-0.14496	-2.37637e-07	-0.14496	-9.9539e-08
-0.14252	-1.30807e-07	-0.14252	-2.33731e-07	-0.14252	-9.95084e-08
-0.14008	-1.30196e-07	-0.14008	-2.32541e-07	-0.14008	-9.65482e-08
-0.13763	-1.29128e-07	-0.13763	-2.30802e-07	-0.13763	-9.57243e-08
-0.13519	-1.27144e-07	-0.13519	-2.27658e-07	-0.13519	-9.49308e-08
-0.13275	-1.26717e-07	-0.13275	-2.25278e-07	-0.13275	-9.33439e-08
-0.13031	-1.25832e-07	-0.13031	-2.22928e-07	-0.13031	-9.23978e-08
-0.12787	-1.23574e-07	-0.12787	-2.20609e-07	-0.12787	-9.01395e-08
-0.12543	-1.21987e-07	-0.12543	-2.17404e-07	-0.12543	-8.92851e-08
-0.12299	-1.2098e-07	-0.12299	-2.15573e-07	-0.12299	-8.83085e-08
-0.12054	-1.19973e-07	-0.12054	-2.14108e-07	-0.12054	-8.60502e-08
-0.1181	-1.19454e-07	-0.1181	-2.10507e-07	-0.1181	-8.63554e-08
-0.11566	-1.17531e-07	-0.11566	-2.08585e-07	-0.11566	-8.51041e-08
-0.11322	-1.15792e-07	-0.11322	-2.06418e-07	-0.11322	-8.27543e-08
-0.11078	-1.13869e-07	-0.11078	-2.0477e-07	-0.11078	-8.30289e-08
-0.10834	-1.14632e-07	-0.10834	-2.00528e-07	-0.10834	-8.00687e-08
-0.1059	-1.12374e-07	-0.1059	-1.98331e-07	-0.1059	-8.07706e-08
-0.10345	-1.1158e-07	-0.10345	-1.95371e-07	-0.10345	-7.82377e-08
-0.10101	-1.092e-07	-0.10101	-1.93051e-07	-0.10101	-7.7963e-08
-0.09857	-1.09963e-07	-0.09857	-1.89755e-07	-0.09857	-7.52164e-08
-0.09613	-1.09261e-07	-0.09613	-1.87589e-07	-0.09613	-7.36906e-08
-0.09369	-1.07888e-07	-0.09369	-1.84323e-07	-0.09369	-7.32938e-08
-0.09125	-1.07003e-07	-0.09125	-1.82889e-07	-0.09125	-7.11271e-08
-0.08881	-1.05172e-07	-0.08881	-1.8121e-07	-0.08881	-7.04862e-08
-0.08636	-1.03768e-07	-0.08636	-1.759e-07	-0.08636	-6.81974e-08
-0.08392	-1.03737e-07	-0.08392	-1.73734e-07	-0.08392	-6.95707e-08
-0.08148	-1.02852e-07	-0.08148	-1.71353e-07	-0.08148	-6.71293e-08
-0.07904	-1.01662e-07	-0.07904	-1.70682e-07	-0.07904	-6.5817e-08
-0.0766	-1.00258e-07	-0.0766	-1.67539e-07	-0.0766	-6.38944e-08
-0.07416	-9.81833e-08	-0.07416	-1.65494e-07	-0.07416	-6.37418e-08
-0.07172	-9.76645e-08	-0.07172	-1.61527e-07	-0.07172	-6.2216e-08
-0.06927	-9.5101e-08	-0.06927	-1.58841e-07	-0.06927	-6.10258e-08
-0.06683	-9.52231e-08	-0.06683	-1.56186e-07	-0.06683	-5.89506e-08
-0.06439	-9.61386e-08	-0.06439	-1.55026e-07	-0.06439	-5.72111e-08
-0.06195	-9.43686e-08	-0.06195	-1.517e-07	-0.06195	-5.58683e-08
-0.05951	-9.35751e-08	-0.05951	-1.49228e-07	-0.05951	-5.56242e-08
-0.05707	-9.20798e-08	-0.05707	-1.47214e-07	-0.05707	-5.41593e-08
-0.05463	-9.21103e-08	-0.05463	-1.43582e-07	-0.05463	-5.30302e-08
-0.05219	-9.14084e-08	-0.05219	-1.41385e-07	-0.05219	-5.20231e-08
-0.04974	-8.88449e-08	-0.04974	-1.39035e-07	-0.04974	-5.06803e-08
-0.0473	-8.6434e-08	-0.0473	-1.358e-07	-0.0473	-4.80558e-08
-0.04486	-8.75326e-08	-0.04486	-1.33237e-07	-0.04486	-4.86662e-08
-0.04242	-8.71054e-08	-0.04242	-1.30338e-07	-0.04242	-4.65604e-08
-0.03998	-8.72885e-08	-0.03998	-1.28049e-07	-0.03998	-4.58585e-08
-0.03754	-8.70138e-08	-0.03754	-1.24112e-07	-0.03754	-4.42411e-08
-0.0351	-8.57626e-08	-0.0351	-1.22434e-07	-0.0351	-4.3173e-08
-0.03265	-8.36874e-08	-0.03265	-1.21762e-07	-0.03265	-4.20133e-08
-0.03021	-8.27109e-08	-0.03021	-1.16971e-07	-0.03021	-4.00297e-08
-0.02777	-8.16122e-08	-0.02777	-1.16025e-07	-0.02777	-3.95719e-08
-0.02533	-8.24972e-08	-0.02533	-1.13828e-07	-0.02533	-3.89005e-08
-0.02289	-7.92929e-08	-0.02289	-1.0864e-07	-0.02289	-3.76188e-08
-0.02045	-7.86215e-08	-0.02045	-1.06503e-07	-0.02045	-3.60929e-08
-0.01801	-7.75229e-08	-0.01801	-1.05191e-07	-0.01801	-3.38346e-08
-0.01556	-7.61191e-08	-0.01556	-1.01621e-07	-0.01556	-3.27665e-08
-0.01312	-7.51425e-08	-0.01312	-9.97896e-08	-0.01312	-3.35905e-08
-0.01068	-7.35556e-08	-0.01068	-9.77754e-08	-0.01068	-2.90739e-08
-0.00824	-7.2518e-08	-0.00824	-9.30452e-08	-0.00824	-2.92265e-08
-0.0058	-7.19992e-08	-0.0058	-9.24348e-08	-0.0058	-2.88602e-08
-0.00336	-6.91e-08	-0.00336	-9.05122e-08	-0.00336	-2.66019e-08
-0.000915527	-6.77878e-08	-0.000915527	-8.72163e-08	-0.000915527	-2.62357e-08
0.00153	-6.4675e-08	0.00153	-8.39509e-08	0.00153	-2.37638e-08
0.00397	-6.47665e-08	0.00397	-8.15095e-08	0.00397	-2.36723e-08
0.00641	-6.13791e-08	0.00641	-7.9709e-08	0.00641	-2.27872e-08
0.00885	-6.0433e-08	0.00885	-7.74507e-08	0.00885	-2.06205e-08
0.01129	-5.9487e-08	0.01129	-7.40022e-08	0.01129	-1.8942e-08
0.01373	-5.84494e-08	0.01373	-7.02791e-08	0.01373	-1.93082e-08
0.01617	-5.73202e-08	0.01617	-7.00349e-08	0.01617	-1.60734e-08
0.01862	-5.70151e-08	0.01862	-6.56709e-08	0.01862	-1.57377e-08
0.02106	-5.5123e-08	0.02106	-6.46333e-08	0.02106	-1.44559e-08
0.0235	-5.39328e-08	0.0235	-6.22529e-08	0.0235	-1.35099e-08
0.02594	-5.32309e-08	0.02594	-5.80415e-08	0.02594	-1.23197e-08
0.02838	-5.21322e-08	0.02838	-5.55696e-08	0.02838	-1.1923e-08
0.03082	-5.07284e-08	0.03082	-5.33418e-08	0.03082	-9.81728e-09
0.03326	-4.93857e-08	0.03326	-5.18159e-08	0.03326	-8.4745e-09
0.03571	-4.78293e-08	0.03571	-4.70857e-08	0.03571	-6.58241e-09
0.03815	-4.74325e-08	0.03815	-4.54072e-08	0.03815	-5.88051e-09
0.04059	-4.58456e-08	0.04059	-4.39424e-08	0.04059	-5.48378e-09
0.04303	-4.40756e-08	0.04303	-4.08296e-08	0.04303	-3.28652e-09
0.04547	-4.21835e-08	0.04547	-3.83272e-08	0.04547	-2.30995e-09
0.04791	-3.91623e-08	0.04791	-3.58857e-08	0.04791	-1.48598e-09
0.05035	-3.61716e-08	0.05035	-3.34443e-08	0.05035	6.50251e-10
0.0528	-3.47677e-08	0.0528	-3.13997e-08	0.0528	1.87095e-09
0.05524	-3.431e-08	0.05524	-2.75544e-08	0.05524	1.62681e-09
0.05768	-3.33639e-08	0.05768	-2.5937e-08	0.05768	3.42735e-09
0.06012	-3.26925e-08	0.06012	-2.3221e-08	0.06012	4.67857e-09
0.06256	-3.11667e-08	0.06256	-1.9864e-08	0.06256	6.14342e-09
0.065	-2.79013e-08	0.065	-1.73616e-08	0.065	7.54722e-09
0.06744	-2.61618e-08	0.06744	-1.28145e-08	0.06744	8.64586e-09
0.06989	-2.56125e-08	0.06989	-1.17769e-08	0.06989	1.0599e-08
0.07233	-2.26523e-08	0.07233	-9.57959e-09	0.07233	1.08126e-08
0.07477	-1.8685e-08	0.07477	-6.49732e-09	0.07477	1.23385e-08
0.07721	-1.70981e-08	0.07721	-4.54419e-09	0.07721	1.41695e-08
0.07965	-1.65793e-08	0.07965	-1.2483e-09	0.07965	1.54208e-08
0.08209	-1.43515e-08	0.08209	9.79488e-10	0.08209	1.64889e-08
0.08453	-1.32529e-08	0.08453	2.96313e-09	0.08453	1.78011e-08
0.08698	-1.31003e-08	0.08698	5.95385e-09	0.08698	1.98763e-08
0.08942	-1.21237e-08	0.08942	9.52441e-09	0.08942	1.98458e-08
0.09186	-1.14523e-08	0.09186	1.34917e-08	0.09186	2.06393e-08
0.0943	-1.04758e-08	0.0943	1.53533e-08	0.0943	2.28976e-08
0.09674	-9.68229e-09	0.09674	1.79473e-08	0.09674	2.56747e-08
0.09918	-7.75969e-09	0.09918	2.06023e-08	0.09918	2.4454e-08
0.10162	-7.02727e-09	0.10162	2.3654e-08	0.10162	2.64071e-08
0.10406	-6.26433e-09	0.10406	2.60039e-08	0.10406	2.8879e-08
0.10651	-3.18205e-09	0.10651	2.96355e-08	0.10651	3.00082e-08
0.10895	8.33306e-11	0.10895	3.21074e-08	0.10895	3.15951e-08
0.11139	3.25716e-09	0.11139	3.47014e-08	0.11139	3.30599e-08
0.11383	5.57649e-09	0.11383	3.84856e-08	0.11383	3.44332e-08
0.11627	5.27132e-09	0.11627	4.04692e-08	0.11627	3.40975e-08
0.11871	7.19393e-09	0.11871	4.38262e-08	0.11871	3.67525e-08
0.12115	9.17757e-09	0.12115	4.66338e-08	0.12115	3.73629e-08
0.1236	1.21073e-08	0.1236	4.97771e-08	0.1236	3.8492e-08
0.12604	1.26871e-08	0.12604	5.24321e-08	0.12604	3.98653e-08
0.12848	1.44876e-08	0.12848	5.69792e-08	0.12848	4.20626e-08
0.13092	1.66849e-08	0.13092	5.84746e-08	0.13092	4.38021e-08
0.13336	1.87601e-08	0.13336	6.24724e-08	0.13336	4.49007e-08
0.1358	2.13541e-08	0.1358	6.41204e-08	0.1358	4.55416e-08
0.13824	2.40701e-08	0.13824	6.84233e-08	0.13824	4.64571e-08
0.14069	2.77628e-08	0.14069	7.12004e-08	0.14069	4.73421e-08
0.14313	3.08756e-08	0.14313	7.39775e-08	0.14313	4.95699e-08
0.14557	3.39884e-08	0.14557	7.72429e-08	0.14557	5.09737e-08
0.14801	3.88712e-08	0.14801	8.20342e-08	0.14801	5.26522e-08
0.15045	3.97562e-08	0.15045	8.33769e-08	0.15045	5.41781e-08
0.15289	4.38455e-08	0.15289	8.82292e-08	0.15289	5.52767e-08
0.15533	4.54935e-08	0.15533	9.04265e-08	0.15533	5.60091e-08
0.15778	4.73245e-08	0.15778	9.37224e-08	0.15778	5.75961e-08
0.16022	5.02847e-08	0.16022	9.72319e-08	0.16022	6.03732e-08
0.16266	5.40384e-08	0.16266	1.00223e-07	0.16266	6.08614e-08
0.1651	5.767e-08	0.1651	1.03244e-07	0.1651	6.24178e-08
0.16754	6.05081e-08	0.16754	1.06814e-07	0.16754	6.29977e-08
0.16998	6.27359e-08	0.16998	1.10232e-07	0.16998	6.47677e-08
0.17242	6.62454e-08	0.17242	1.14078e-07	0.17242	6.56527e-08
0.17487	6.99991e-08	0.17487	1.18716e-07	0.17487	6.81246e-08
0.17731	7.36307e-08	0.17731	1.2247e-07	0.17731	6.93453e-08
0.17975	7.61637e-08	0.17975	1.25156e-07	0.17975	7.06881e-08
0.18219	7.97647e-08	0.18219	1.28787e-07	0.18219	7.16647e-08
0.18463	8.27249e-08	0.18463	1.33578e-07	0.18463	7.30685e-08
0.18707	8.47696e-08	0.18707	1.37027e-07	0.18707	7.49606e-08
0.18951	8.892e-08	0.18951	1.39834e-07	0.18951	7.57845e-08
0.19196	9.19412e-08	0.19196	1.42703e-07	0.19196	7.86532e-08
0.1944	9.4169e-08	0.1944	1.47555e-07	0.1944	7.90804e-08
0.19684	9.7587e-08	0.19684	1.5195e-07	0.19684	8.17049e-08
0.19928	1.01005e-07	0.19928	1.55063e-07	0.19928	8.38107e-08
0.20172	1.03599e-07	0.20172	1.57687e-07	0.20172	8.48788e-08
0.20416	1.08024e-07	0.20416	1.62906e-07	0.20416	8.54891e-08
0.2066	1.13059e-07	0.2066	1.65195e-07	0.2066	8.74728e-08
0.20905	1.16813e-07	0.20905	1.69894e-07	0.20905	8.92123e-08
0.21149	1.21665e-07	0.21149	1.73648e-07	0.21149	9.03414e-08
0.21393	1.25755e-07	0.21393	1.79019e-07	0.21393	9.23556e-08
0.21637	1.30973e-07	0.21637	1.81583e-07	0.21637	9.47665e-08
0.21881	1.34605e-07	0.21881	1.85092e-07	0.21881	9.50716e-08
0.22125	1.38603e-07	0.22125	1.90616e-07	0.22125	9.72079e-08
0.22369	1.43669e-07	0.22369	1.94888e-07	0.22369	9.91305e-08
0.22614	1.48094e-07	0.22614	1.98703e-07	0.22614	1.01328e-07
0.22858	1.50688e-07	0.22858	2.02151e-07	0.22858	1.01419e-07
0.23102	1.53068e-07	0.23102	2.06424e-07	0.23102	1.04715e-07
0.23346	1.5731e-07	0.23346	2.10422e-07	0.23346	1.06455e-07
0.2359	1.61704e-07	0.2359	2.15274e-07	0.2359	1.07309e-07
0.23834	1.62986e-07	0.23834	2.17166e-07	0.23834	1.10605e-07
0.24078	1.67991e-07	0.24078	2.22659e-07	0.24078	1.12436e-07
0.24323	1.7028e-07	0.24323	2.26626e-07	0.24323	1.12833e-07
0.24567	1.75743e-07	0.24567	2.29983e-07	0.24567	1.14176e-07
0.24811	1.7974e-07	0.24811	2.34256e-07	0.24811	1.16464e-07
0.25055	1.85447e-07	0.25055	2.39139e-07	0.25055	1.18479e-07
0.25299	1.90483e-07	0.25299	2.44021e-07	0.25299	1.19943e-07
0.25543	1.95304e-07	0.25543	2.49515e-07	0.25543	1.21927e-07
0.25787	2.0095e-07	0.25787	2.53787e-07	0.25787	1.24246e-07
0.26031	2.05558e-07	0.26031	2.57144e-07	0.26031	1.26505e-07
0.26276	2.09739e-07	0.26276	2.61111e-07	0.26276	1.28946e-07
0.2652	2.1569e-07	0.2652	2.66604e-07	0.2652	1.30319e-07
0.26764	2.20329e-07	0.26764	2.70877e-07	0.26764	1.32028e-07
0.27008	2.24784e-07	0.27008	2.76065e-07	0.27008	1.33921e-07
0.27252	2.29911e-07	0.27252	2.80643e-07	0.27252	1.36423e-07
0.27496	2.35862e-07	0.27496	2.84915e-07	0.27496	1.38986e-07
0.2774	2.40257e-07	0.2774	2.89493e-07	0.2774	1.40726e-07
0.27985	2.46635e-07	0.27985	2.94375e-07	0.27985	1.42526e-07
0.28229	2.52799e-07	0.28229	2.99869e-07	0.28229	1.44663e-07
0.28473	2.59452e-07	0.28473	3.04141e-07	0.28473	1.47318e-07
0.28717	2.65769e-07	0.28717	3.09634e-07	0.28717	1.48905e-07
0.28961	2.72849e-07	0.28961	3.11465e-07	0.28961	1.51071e-07
0.29205	2.77427e-07	0.29205	3.18179e-07	0.29205	1.52048e-07
0.29449	2.84995e-07	0.29449	3.23367e-07	0.29449	1.55802e-07
0.29694	2.91709e-07	0.29694	3.26724e-07	0.29694	1.5809e-07
0.29938	2.98942e-07	0.29938	3.33438e-07	0.29938	1.59098e-07
0.30182	3.05869e-07	0.30182	3.371e-07	0.30182	1.62973e-07
0.30426	3.12095e-07	0.30426	3.43814e-07	0.30426	1.63675e-07
0.3067	3.19511e-07	0.3067	3.46866e-07	0.3067	1.67459e-07
0.30914	3.25096e-07	0.30914	3.51749e-07	0.30914	1.69504e-07
0.31158	3.30894e-07	0.31158	3.57547e-07	0.31158	1.70359e-07
0.31403	3.39225e-07	0.31403	3.61209e-07	0.31403	1.73075e-07
0.31647	3.44261e-07	0.31647	3.66702e-07	0.31647	1.7692e-07
0.31891	3.50669e-07	0.31891	3.71585e-07	0.31891	1.78781e-07
0.32135	3.57688e-07	0.32135	3.75247e-07	0.32135	1.80399e-07
0.32379	3.65013e-07	0.32379	3.81351e-07	0.32379	1.83451e-07
0.32623	3.73252e-07	0.32623	3.84708e-07	0.32623	1.84946e-07
0.32867	3.80576e-07	0.32867	3.90811e-07	0.32867	1.87998e-07
0.33112	3.88206e-07	0.33112	3.95694e-07	0.33112	1.90561e-07
0.33356	3.97361e-07	0.33356	3.99661e-07	0.33356	1.92331e-07
0.336	4.0377e-07	0.336	4.04849e-07	0.336	1.94101e-07
0.33844	4.11094e-07	0.33844	4.10037e-07	0.33844	1.97367e-07
0.34088	4.18418e-07	0.34088	4.14615e-07	0.34088	1.999e-07
0.34332	4.24217e-07	0.34332	4.19192e-07	0.34332	2.02951e-07
0.34576	4.3032e-07	0.34576	4.2377e-07	0.34576	2.04752e-07
0.34821	4.3856e-07	0.34821	4.28348e-07	0.34821	2.0817e-07
0.35065	4.46189e-07	0.35065	4.31399e-07	0.35065	2.09909e-07
0.35309	4.52293e-07	0.35309	4.35977e-07	0.35309	2.12412e-07
0.35553	4.60838e-07	0.35553	4.40555e-07	0.35553	2.15677e-07
0.35797	4.67246e-07	0.35797	4.44827e-07	0.35797	2.18546e-07
0.36041	4.76097e-07	0.36041	4.51236e-07	0.36041	2.21109e-07
0.36285	4.83726e-07	0.36285	4.54898e-07	0.36285	2.21231e-07
0.3653	4.92576e-07	0.3653	4.5856e-07	0.3653	2.26755e-07
0.36774	5.01426e-07	0.36774	4.64358e-07	0.36774	2.28006e-07
0.37018	5.10887e-07	0.37018	4.67715e-07	0.37018	2.30265e-07
0.37262	5.19737e-07	0.37262	4.71683e-07	0.37262	2.33042e-07
0.37506	5.27976e-07	0.37506	4.7565e-07	0.37506	2.35575e-07
0.3775	5.38352e-07	0.3775	4.80533e-07	0.3775	2.39176e-07
0.37994	5.47508e-07	0.37994	4.8511e-07	0.37994	2.42319e-07
0.38239	5.56968e-07	0.38239	4.88467e-07	0.38239	2.46317e-07
0.38483	5.65208e-07	0.38483	4.92435e-07	0.38483	2.48026e-07
0.38727	5.73448e-07	0.38727	4.97012e-07	0.38727	2.50864e-07
0.38971	5.80467e-07	0.38971	5.00979e-07	0.38971	2.54618e-07
0.39215	5.88706e-07	0.39215	5.04031e-07	0.39215	2.5651e-07
0.39459	5.97251e-07	0.39459	5.07999e-07	0.39459	2.59226e-07
0.39703	6.04576e-07	0.39703	5.13187e-07	0.39703	2.61972e-07
0.39948	6.11289e-07	0.39948	5.16849e-07	0.39948	2.65634e-07
0.40192	6.19224e-07	0.40192	5.21121e-07	0.40192	2.68076e-07
0.40436	6.26243e-07	0.40436	5.24478e-07	0.40436	2.70517e-07
0.4068	6.34788e-07	0.4068	5.28445e-07	0.4068	2.73264e-07
0.40924	6.43943e-07	0.40924	5.31497e-07	0.40924	2.76316e-07
0.41168	6.52793e-07	0.41168	5.36685e-07	0.41168	2.80283e-07
0.41412	6.61338e-07	0.41412	5.38821e-07	0.41412	2.83029e-07
0.41656	6.72325e-07	0.41656	5.4462e-07	0.41656	2.85776e-07
0.41901	6.82701e-07	0.41901	5.45535e-07	0.41901	2.89133e-07
0.42145	6.92771e-07	0.42145	5.50723e-07	0.42145	2.91574e-07
0.42389	7.02842e-07	0.42389	5.55301e-07	0.42389	2.95847e-07
0.42633	7.13828e-07	0.42633	5.58658e-07	0.42633	3.00119e-07
0.42877	7.21153e-07	0.42877	5.61099e-07	0.42877	3.03171e-07
0.43121	7.31529e-07	0.43121	5.65982e-07	0.43121	3.06528e-07
0.43365	7.38853e-07	0.43365	5.68423e-07	0.43365	3.09885e-07
0.4361	7.49839e-07	0.4361	5.7178e-07	0.4361	3.14157e-07
0.43854	7.57163e-07	0.43854	5.76968e-07	0.43854	3.14768e-07
0.44098	7.68455e-07	0.44098	5.79715e-07	0.44098	3.20261e-07
0.44342	7.75474e-07	0.44342	5.83682e-07	0.44342	3.21482e-07
0.44586	7.86155e-07	0.44586	5.86734e-07	0.44586	3.26059e-07
0.4483	7.95005e-07	0.4483	5.90701e-07	0.4483	3.29111e-07
0.45074	8.0355e-07	0.45074	5.93753e-07	0.45074	3.34299e-07
0.45319	8.13316e-07	0.45319	5.965e-07	0.45319	3.3552e-07
0.45563	8.23081e-07	0.45563	6.01687e-07	0.45563	3.39487e-07
0.45807	8.32237e-07	0.45807	6.04129e-07	0.45807	3.43454e-07
0.46051	8.42307e-07	0.46051	6.08401e-07	0.46051	3.48947e-07
0.46295	8.50852e-07	0.46295	6.11453e-07	0.46295	3.51694e-07
0.46539	8.61534e-07	0.46539	6.1481e-07	0.46539	3.55661e-07
0.46783	8.70078e-07	0.46783	6.18777e-07	0.46783	3.58713e-07
0.47028	8.81675e-07	0.47028	6.22134e-07	0.47028	3.6268e-07
0.47272	8.9022e-07	0.47272	6.24881e-07	0.47272	3.65732e-07
0.47516	9.00291e-07	0.47516	6.26102e-07	0.47516	3.7031e-07
0.4776	9.10362e-07	0.4776	6.3129e-07	0.4776	3.73361e-07
0.48004	9.21653e-07	0.48004	6.34952e-07	0.48004	3.7916e-07
0.48248	9.32029e-07	0.48248	6.36478e-07	0.48248	3.80075e-07
0.48492	9.43015e-07	0.48492	6.42581e-07	0.48492	3.84958e-07
0.48737	9.5156e-07	0.48737	6.45938e-07	0.48737	3.90146e-07
0.48981	9.63157e-07	0.48981	6.47769e-07	0.48981	3.93198e-07
0.49225	9.74449e-07	0.49225	6.52041e-07	0.49225	3.9686e-07
0.49469	9.8574e-07	0.49469	6.54483e-07	0.49469	4.03269e-07
0.49713	9.96421e-07	0.49713	6.58755e-07	0.49713	4.051e-07
0.49957	1.0068e-06	0.49957	6.62723e-07	0.49957	4.10898e-07
0.50201	1.01504e-06	0.50201	6.65469e-07	0.50201	4.1456e-07
0.50446	1.02846e-06	0.50446	6.69437e-07	0.50446	4.19748e-07
0.5069	1.03976e-06	0.5069	6.72793e-07	0.5069	4.2341e-07
0.50934	1.04983e-06	0.50934	6.77371e-07	0.50934	4.28598e-07
0.51178	1.06142e-06	0.51178	6.79507e-07	0.51178	4.33786e-07
0.51422	1.07149e-06	0.51422	6.82559e-07	0.51422	4.37754e-07
0.51666	1.08431e-06	0.51666	6.87442e-07	0.51666	4.42942e-07
0.5191	1.09713e-06	0.5191	6.91409e-07	0.5191	4.46298e-07
0.52155	1.10842e-06	0.52155	6.94156e-07	0.52155	4.51792e-07
0.52399	1.12124e-06	0.52399	6.98733e-07	0.52399	4.56674e-07
0.52643	1.13528e-06	0.52643	7.02396e-07	0.52643	4.61862e-07
0.52887	1.14809e-06	0.52887	7.06058e-07	0.52887	4.6644e-07
0.53131	1.15877e-06	0.53131	7.0972e-07	0.53131	4.70713e-07
0.53375	1.17159e-06	0.53375	7.12466e-07	0.53375	4.76511e-07
0.53619	1.18594e-06	0.53619	7.16434e-07	0.53619	4.82004e-07
0.53864	1.20028e-06	0.53864	7.21316e-07	0.53864	4.86582e-07
0.54108	1.21401e-06	0.54108	7.23758e-07	0.54108	4.92075e-07
0.54352	1.22469e-06	0.54352	7.2803e-07	0.54352	4.97263e-07
0.54596	1.23568e-06	0.54596	7.32608e-07	0.54596	5.02451e-07
0.5484	1.24606e-06	0.5484	7.3627e-07	0.5484	5.08859e-07
0.55084	1.25735e-06	0.55084	7.40237e-07	0.55084	5.14353e-07
0.55328	1.27169e-06	0.55328	7.43899e-07	0.55328	5.19846e-07
0.55573	1.28481e-06	0.55573	7.48477e-07	0.55573	5.24729e-07
0.55817	1.29732e-06	0.55817	7.52444e-07	0.55817	5.30527e-07
0.56061	1.31014e-06	0.56061	7.55496e-07	0.56061	5.3602e-07
0.56305	1.32387e-06	0.56305	7.59769e-07	0.56305	5.41818e-07
0.56549	1.33791e-06	0.56549	7.64346e-07	0.56549	5.47922e-07
0.56793	1.35287e-06	0.56793	7.69229e-07	0.56793	5.54941e-07
0.57037	1.36721e-06	0.57037	7.72586e-07	0.57037	5.58298e-07
0.57281	1.37972e-06	0.57281	7.77164e-07	0.57281	5.66538e-07
0.57526	1.39315e-06	0.57526	7.81741e-07	0.57526	5.72336e-07
0.5777	1.40749e-06	0.5777	7.85403e-07	0.5777	5.7966e-07
0.58014	1.42062e-06	0.58014	7.89676e-07	0.58014	5.84238e-07
0.58258	1.43526e-06	0.58258	7.94253e-07	0.58258	5.91257e-07
0.58502	1.44686e-06	0.58502	7.97305e-07	0.58502	5.97055e-07
0.58746	1.46151e-06	0.58746	8.01883e-07	0.58746	6.03464e-07
0.5899	1.47372e-06	0.5899	8.0524e-07	0.5899	6.11399e-07
0.59235	1.48806e-06	0.59235	8.11648e-07	0.59235	6.15671e-07
0.59479	1.50027e-06	0.59479	8.15005e-07	0.59479	6.23911e-07
0.59723	1.5143e-06	0.59723	8.18667e-07	0.59723	6.3154e-07
0.59967	1.52865e-06	0.59967	8.24466e-07	0.59967	6.37949e-07
0.60211	1.5436e-06	0.60211	8.29959e-07	0.60211	6.45273e-07
0.60455	1.55764e-06	0.60455	8.33926e-07	0.60455	6.51071e-07
0.60699	1.57259e-06	0.60699	8.39419e-07	0.60699	6.59006e-07
0.60944	1.58602e-06	0.60944	8.42471e-07	0.60944	6.65415e-07
0.61188	1.60128e-06	0.61188	8.46744e-07	0.61188	6.74265e-07
0.61432	1.61593e-06	0.61432	8.52237e-07	0.61432	6.80979e-07
0.61676	1.6318e-06	0.61676	8.56509e-07	0.61676	6.88913e-07
0.6192	1.64461e-06	0.6192	8.61392e-07	0.6192	6.96543e-07
0.62164	1.66231e-06	0.62164	8.64139e-07	0.62164	7.03562e-07
0.62408	1.67483e-06	0.62408	8.69937e-07	0.62408	7.11496e-07
0.62653	1.6907e-06	0.62653	8.7482e-07	0.62653	7.19431e-07
0.62897	1.70657e-06	0.62897	8.80008e-07	0.62897	7.2706e-07
0.63141	1.72091e-06	0.63141	8.8428e-07	0.63141	7.3469e-07
0.63385	1.73739e-06	0.63385	8.88858e-07	0.63385	7.42014e-07
0.63629	1.75204e-06	0.63629	8.95572e-07	0.63629	7.51474e-07
0.63873	1.76791e-06	0.63873	8.99539e-07	0.63873	7.59104e-07
0.64117	1.78133e-06	0.64117	9.05643e-07	0.64117	7.67343e-07
0.64362	1.7969e-06	0.64362	9.1022e-07	0.64362	7.75278e-07
0.64606	1.81155e-06	0.64606	9.16629e-07	0.64606	7.83823e-07
0.6485	1.82711e-06	0.6485	9.23038e-07	0.6485	7.91147e-07
0.65094	1.84298e-06	0.65094	9.2731e-07	0.65094	8.02744e-07
0.65338	1.85671e-06	0.65338	9.32803e-07	0.65338	8.11289e-07
0.65582	1.87289e-06	0.65582	9.39517e-07	0.65582	8.18613e-07
0.65826	1.88998e-06	0.65826	9.44095e-07	0.65826	8.28989e-07
0.66071	1.90646e-06	0.66071	9.49893e-07	0.66071	8.37229e-07
0.66315	1.92324e-06	0.66315	9.54776e-07	0.66315	8.43637e-07
0.66559	1.93819e-06	0.66559	9.61795e-07	0.66559	8.55234e-07
0.66803	1.95284e-06	0.66803	9.66678e-07	0.66803	8.62253e-07
0.67047	1.9678e-06	0.67047	9.74002e-07	0.67047	8.7385e-07
0.67291	1.98397e-06	0.67291	9.81326e-07	0.67291	8.83615e-07
0.67535	2.00075e-06	0.67535	9.87735e-07	0.67535	8.93991e-07
0.6778	2.01571e-06	0.6778	9.92007e-07	0.6778	9.03147e-07
0.68024	2.03432e-06	0.68024	9.975e-07	0.68024	9.12607e-07
0.68268	2.05019e-06	0.68268	1.0036e-06	0.68268	9.21152e-07
0.68512	2.06606e-06	0.68512	1.01093e-06	0.68512	9.33054e-07
0.68756	2.08102e-06	0.68756	1.01734e-06	0.68756	9.43735e-07
0.69	2.09597e-06	0.69	1.02466e-06	0.69	9.54416e-07
0.69244	2.11001e-06	0.69244	1.03107e-06	0.69244	9.64182e-07
0.69489	2.12649e-06	0.69489	1.03839e-06	0.69489	9.75168e-07
0.69733	2.14297e-06	0.69733	1.04541e-06	0.69733	9.84018e-07
0.69977	2.15884e-06	0.69977	1.05304e-06	0.69977	9.95615e-07
0.70221	2.17409e-06	0.70221	1.05854e-06	0.70221	1.0063e-06
0.70465	2.19302e-06	0.70465	1.06739e-06	0.70465	1.01728e-06
0.70709	2.20827e-06	0.70709	1.07318e-06	0.70709	1.0304e-06
0.70953	2.22506e-06	0.70953	1.08234e-06	0.70953	1.03895e-06
0.71198	2.23971e-06	0.71198	1.09058e-06	0.71198	1.05055e-06
0.71442	2.25588e-06	0.71442	1.0976e-06	0.71442	1.06184e-06
0.71686	2.27175e-06	0.71686	1.10553e-06	0.71686	1.07374e-06
0.7193	2.28823e-06	0.7193	1.11438e-06	0.7193	1.08442e-06
0.72174	2.3041e-06	0.72174	1.12262e-06	0.72174	1.09907e-06
0.72418	2.32088e-06	0.72418	1.13025e-06	0.72418	1.10914e-06
0.72662	2.33706e-06	0.72662	1.13971e-06	0.72662	1.12043e-06
0.72906	2.35415e-06	0.72906	1.14795e-06	0.72906	1.13142e-06
0.73151	2.3688e-06	0.73151	1.15772e-06	0.73151	1.14668e-06
0.73395	2.38558e-06	0.73395	1.16535e-06	0.73395	1.15705e-06
0.73639	2.39901e-06	0.73639	1.17542e-06	0.73639	1.16895e-06
0.73883	2.4161e-06	0.73883	1.18488e-06	0.73883	1.1836e-06
0.74127	2.43014e-06	0.74127	1.19312e-06	0.74127	1.19581e-06
0.74371	2.44509e-06	0.74371	1.20136e-06	0.74371	1.20771e-06
0.74615	2.45943e-06	0.74615	1.21295e-06	0.74615	1.22267e-06
0.7486	2.47439e-06	0.7486	1.22089e-06	0.7486	1.23609e-06
0.75104	2.48843e-06	0.75104	1.23065e-06	0.75104	1.24983e-06
0.75348	2.50582e-06	0.75348	1.24195e-06	0.75348	1.26417e-06
0.75592	2.5223e-06	0.75592	1.2508e-06	0.75592	1.27821e-06
0.75836	2.53695e-06	0.75836	1.26087e-06	0.75836	1.29225e-06
0.7608	2.55221e-06	0.7608	1.27033e-06	0.7608	1.30689e-06
0.76324	2.56777e-06	0.76324	1.2807e-06	0.76324	1.32307e-06
0.76569	2.58395e-06	0.76569	1.28955e-06	0.76569	1.33436e-06
0.76813	2.59768e-06	0.76813	1.30023e-06	0.76813	1.35206e-06
0.77057	2.61172e-06	0.77057	1.31275e-06	0.77057	1.36549e-06
0.77301	2.62667e-06	0.77301	1.32434e-06	0.77301	1.38197e-06
0.77545	2.6401e-06	0.77545	1.3335e-06	0.77545	1.39753e-06
0.77789	2.65322e-06	0.77789	1.3451e-06	0.77789	1.4131e-06
0.78033	2.66573e-06	0.78033	1.35639e-06	0.78033	1.42805e-06
0.78278	2.67947e-06	0.78278	1.36707e-06	0.78278	1.44453e-06
0.78522	2.69167e-06	0.78522	1.37867e-06	0.78522	1.4607e-06
0.78766	2.70571e-06	0.78766	1.39026e-06	0.78766	1.4781e-06
0.7901	2.71792e-06	0.7901	1.40155e-06	0.7901	1.49519e-06
0.79254	2.73165e-06	0.79254	1.41315e-06	0.79254	1.51228e-06
0.79498	2.7405e-06	0.79498	1.42444e-06	0.79498	1.52723e-06
0.79742	2.75271e-06	0.79742	1.43604e-06	0.79742	1.54585e-06
0.79987	2.76278e-06	0.79987	1.44794e-06	0.79987	1.56294e-06
0.80231	2.77438e-06	0.80231	1.46137e-06	0.80231	1.58247e-06
0.80475	2.78353e-06	0.80475	1.47174e-06	0.80475	1.59681e-06
0.80719	2.79391e-06	0.80719	1.48517e-06	0.80719	1.61543e-06
0.80963	2.80642e-06	0.80963	1.50043e-06	0.80963	1.63282e-06
0.81207	2.81802e-06	0.81207	1.51203e-06	0.81207	1.65357e-06
0.81451	2.82748e-06	0.81451	1.52362e-06	0.81451	1.67005e-06
0.81696	2.83846e-06	0.81696	1.53888e-06	0.81696	1.68836e-06
0.8194	2.84792e-06	0.8194	1.54987e-06	0.8194	1.70759e-06
0.82184	2.85677e-06	0.82184	1.56391e-06	0.82184	1.72651e-06
0.82428	2.86532e-06	0.82428	1.57672e-06	0.82428	1.74604e-06
0.82672	2.87295e-06	0.82672	1.59076e-06	0.82672	1.76435e-06
0.82916	2.88027e-06	0.82916	1.60236e-06	0.82916	1.78266e-06
0.8316	2.88851e-06	0.8316	1.61914e-06	0.8316	1.80372e-06
0.83405	2.894e-06	0.83405	1.63257e-06	0.83405	1.82264e-06
0.83649	2.90041e-06	0.83649	1.64661e-06	0.83649	1.84583e-06
0.83893	2.9056e-06	0.83893	1.65943e-06	0.83893	1.86262e-06
0.84137	2.91323e-06	0.84137	1.67499e-06	0.84137	1.88459e-06
0.84381	2.9172e-06	0.84381	1.68842e-06	0.84381	1.90565e-06
0.84625	2.92208e-06	0.84625	1.70307e-06	0.84625	1.92426e-06
0.84869	2.92666e-06	0.84869	1.71741e-06	0.84869	1.94593e-06
0.85114	2.93124e-06	0.85114	1.73358e-06	0.85114	1.96943e-06
0.85358	2.93673e-06	0.85358	1.74671e-06	0.85358	1.98957e-06
0.85602	2.94222e-06	0.85602	1.76288e-06	0.85602	2.01185e-06
0.85846	2.94436e-06	0.85846	1.77722e-06	0.85846	2.0323e-06
0.8609	2.94619e-06	0.8609	1.79126e-06	0.8609	2.05519e-06
0.86334	2.94863e-06	0.86334	1.80622e-06	0.86334	2.07533e-06
0.86578	2.95199e-06	0.86578	1.823e-06	0.86578	2.09821e-06
0.86823	2.95229e-06	0.86823	1.83826e-06	0.86823	2.11927e-06
0.87067	2.95443e-06	0.87067	1.85535e-06	0.87067	2.14369e-06
0.87311	2.95504e-06	0.87311	1.86908e-06	0.87311	2.16444e-06
0.87555	2.95657e-06	0.87555	1.88526e-06	0.87555	2.18916e-06
0.87799	2.95718e-06	0.87799	1.90052e-06	0.87799	2.21082e-06
0.88043	2.95748e-06	0.88043	1.91577e-06	0.88043	2.23615e-06
0.88287	2.95657e-06	0.88287	1.93225e-06	0.88287	2.25721e-06
0.88531	2.95595e-06	0.88531	1.94995e-06	0.88531	2.2804e-06
0.88776	2.95626e-06	0.88776	1.9646e-06	0.88776	2.30268e-06
0.8902	2.95534e-06	0.8902	1.98261e-06	0.8902	2.32923e-06
0.89264	2.95473e-06	0.89264	1.99848e-06	0.89264	2.35121e-06
0.89508	2.95534e-06	0.89508	2.01648e-06	0.89508	2.37592e-06
0.89752	2.95534e-06	0.89752	2.03113e-06	0.89752	2.39851e-06
0.89996	2.95443e-06	0.89996	2.05036e-06	0.89996	2.42475e-06
0.9024	2.9529e-06	0.9024	2.06562e-06	0.9024	2.44886e-06
0.90485	2.95199e-06	0.90485	2.08332e-06	0.90485	2.4745e-06
0.90729	2.95016e-06	0.90729	2.09949e-06	0.90729	2.50105e-06
0.90973	2.94802e-06	0.90973	2.11658e-06	0.90973	2.52668e-06
0.91217	2.94558e-06	0.91217	2.13367e-06	0.91217	2.54957e-06
0.91461	2.94497e-06	0.91461	2.1532e-06	0.91461	2.57765e-06
0.91705	2.94253e-06	0.91705	2.16968e-06	0.91705	2.60145e-06
0.91949	2.93978e-06	0.91949	2.18982e-06	0.91949	2.62861e-06
0.92194	2.93551e-06	0.92194	2.20508e-06	0.92194	2.65486e-06
0.92438	2.93246e-06	0.92438	2.22553e-06	0.92438	2.6811e-06
0.92682	2.92879e-06	0.92682	2.24414e-06	0.92682	2.70979e-06
0.92926	2.92727e-06	0.92926	2.26367e-06	0.92926	2.73695e-06
0.9317	2.92086e-06	0.9317	2.28137e-06	0.9317	2.76258e-06
0.93414	2.91964e-06	0.93414	2.30213e-06	0.93414	2.79218e-06
0.93658	2.9175e-06	0.93658	2.31952e-06	0.93658	2.81568e-06
0.93903	2.91628e-06	0.93903	2.34027e-06	0.93903	2.8462e-06
0.94147	2.91293e-06	0.94147	2.35828e-06	0.94147	2.87245e-06
0.94391	2.91201e-06	0.94391	2.37354e-06	0.94391	2.90266e-06
0.94635	2.90957e-06	0.94635	2.39246e-06	0.94635	2.93043e-06
0.94879	2.90652e-06	0.94879	2.4126e-06	0.94879	2.96095e-06
0.95123	2.90713e-06	0.95123	2.42969e-06	0.95123	2.98902e-06
0.95367	2.90377e-06	0.95367	2.44709e-06	0.95367	3.02076e-06
0.95612	2.90285e-06	0.95612	2.46479e-06	0.95612	3.04914e-06
0.95856	2.90072e-06	0.95856	2.48462e-06	0.95856	3.07966e-06
0.961	2.89919e-06	0.961	2.50171e-06	0.961	3.10743e-06
0.96344	2.89889e-06	0.96344	2.52033e-06	0.96344	3.13734e-06
0.96588	2.89675e-06	0.96588	2.53986e-06	0.96588	3.16755e-06
0.96832	2.89431e-06	0.96832	2.56092e-06	0.96832	3.20143e-06
0.97076	2.89339e-06	0.97076	2.5777e-06	0.97076	3.23164e-06
0.97321	2.89095e-06	0.97321	2.59967e-06	0.97321	3.2646e-06
0.97565	2.88729e-06	0.97565	2.61615e-06	0.97565	3.29634e-06
0.97809	2.88729e-06	0.97809	2.63507e-06	0.97809	3.32624e-06
0.98053	2.88454e-06	0.98053	2.65277e-06	0.98053	3.3592e-06
0.98297	2.88424e-06	0.98297	2.67017e-06	0.98297	3.39124e-06
0.98541	2.88393e-06	0.98541	2.69031e-06	0.98541	3.42481e-06
0.98785	2.8818e-06	0.98785	2.71045e-06	0.98785	3.46113e-06
0.9903	2.88149e-06	0.9903	2.72937e-06	0.9903	3.49104e-06
0.99274	2.87936e-06	0.99274	2.75012e-06	0.99274	3.52857e-06
0.99518	2.87752e-06	0.99518	2.76813e-06	0.99518	3.56062e-06
0.99762	2.87875e-06	0.99762	2.78766e-06	0.99762	3.59785e-06
1.00006	2.87966e-06	1.00006	2.80506e-06	1.00006	3.63142e-06
1.0025	2.87661e-06	1.0025	2.82459e-06	1.0025	3.66743e-06
1.00494	2.8763e-06	1.00494	2.84503e-06	1.00494	3.70344e-06
1.00739	2.87234e-06	1.00739	2.86609e-06	1.00739	3.74311e-06
1.00983	2.86928e-06	1.00983	2.8841e-06	1.00983	3.77668e-06
1.01227	2.86562e-06	1.01227	2.90485e-06	1.01227	3.81574e-06
1.01471	2.86227e-06	1.01471	2.92285e-06	1.01471	3.85237e-06
1.01715	2.86349e-06	1.01715	2.94452e-06	1.01715	3.8896e-06
1.01959	2.85982e-06	1.01959	2.96161e-06	1.01959	3.92774e-06
1.02203	2.8586e-06	1.02203	2.98114e-06	1.02203	3.96711e-06
1.02448	2.85952e-06	1.02448	3.00037e-06	1.02448	4.00373e-06
1.02692	2.86043e-06	1.02692	3.02265e-06	1.02692	4.04615e-06
1.02936	2.85952e-06	1.02936	3.04218e-06	1.02936	4.08613e-06
1.0318	2.86318e-06	1.0318	3.06232e-06	1.0318	4.13038e-06
1.03424	2.8644e-06	1.03424	3.08277e-06	1.03424	4.16792e-06
1.03668	2.86745e-06	1.03668	3.10382e-06	1.03668	4.21125e-06
1.03912	2.86928e-06	1.03912	3.12213e-06	1.03912	4.25337e-06
1.04156	2.87112e-06	1.04156	3.14197e-06	1.04156	4.29487e-06
1.04401	2.87112e-06	1.04401	3.16211e-06	1.04401	4.33912e-06
1.04645	2.87386e-06	1.04645	3.18439e-06	1.04645	4.38642e-06
1.04889	2.876e-06	1.04889	3.2024e-06	1.04889	4.42793e-06
1.05133	2.88149e-06	1.05133	3.22406e-06	1.05133	4.47645e-06
1.05377	2.88302e-06	1.05377	3.24176e-06	1.05377	4.51765e-06
1.05621	2.88637e-06	1.05621	3.26404e-06	1.05621	4.56709e-06
1.05865	2.88851e-06	1.05865	3.28174e-06	1.05865	4.61286e-06
1.0611	2.88943e-06	1.0611	3.30493e-06	1.0611	4.66047e-06
1.06354	2.89126e-06	1.06354	3.32386e-06	1.06354	4.70716e-06
1.06598	2.894e-06	1.06598	3.34796e-06	1.06598	4.76118e-06
1.06842	2.89522e-06	1.06842	3.36689e-06	1.06842	4.80573e-06
1.07086	2.8995e-06	1.07086	3.38886e-06	1.07086	4.85578e-06
1.0733	2.90102e-06	1.0733	3.40992e-06	1.0733	4.90553e-06
1.07574	2.90255e-06	1.07574	3.43311e-06	1.07574	4.95771e-06
1.07819	2.90316e-06	1.07819	3.45294e-06	1.07819	5.00776e-06
1.08063	2.90469e-06	1.08063	3.47461e-06	1.08063	5.05964e-06
1.08307	2.90682e-06	1.08307	3.49536e-06	1.08307	5.11152e-06
1.08551	2.90896e-06	1.08551	3.51947e-06	1.08551	5.16554e-06
1.08795	2.91323e-06	1.08795	3.54206e-06	1.08795	5.21864e-06
1.09039	2.91994e-06	1.09039	3.56525e-06	1.09039	5.27357e-06
1.09283	2.92452e-06	1.09283	3.58722e-06	1.09283	5.32545e-06
1.09528	2.93063e-06	1.09528	3.61042e-06	1.09528	5.3816e-06
1.09772	2.93581e-06	1.09772	3.63269e-06	1.09772	5.43714e-06
1.10016	2.94344e-06	1.10016	3.65558e-06	1.10016	5.49452e-06
1.1026	2.95046e-06	1.1026	3.68091e-06	1.1026	5.55036e-06
1.10504	2.95748e-06	1.10504	3.70563e-06	1.10504	5.60865e-06
1.10748	2.96175e-06	1.10748	3.72791e-06	1.10748	5.66389e-06
1.10992	2.96908e-06	1.10992	3.75232e-06	1.10992	5.7292e-06
1.11237	2.97427e-06	1.11237	3.7746e-06	1.11237	5.78413e-06
1.11481	2.97945e-06	1.11481	3.79962e-06	1.11481	5.84516e-06
1.11725	2.98586e-06	1.11725	3.82251e-06	1.11725	5.90315e-06
1.11969	2.99227e-06	1.11969	3.84723e-06	1.11969	5.96418e-06
1.12213	2.99593e-06	1.12213	3.87104e-06	1.12213	6.02217e-06
1.12457	3.00356e-06	1.12457	3.8985e-06	1.12457	6.0832e-06
1.12701	3.00967e-06	1.12701	3.92169e-06	1.12701	6.14424e-06
1.12946	3.01546e-06	1.12946	3.94733e-06	1.12946	6.20832e-06
1.1319	3.01913e-06	1.1319	3.97174e-06	1.1319	6.26936e-06
1.13434	3.02309e-06	1.13434	3.99829e-06	1.13434	6.33344e-06
1.13678	3.03042e-06	1.13678	4.02362e-06	1.13678	6.39753e-06
1.13922	3.03561e-06	1.13922	4.04926e-06	1.13922	6.45857e-06
1.14166	3.04293e-06	1.14166	4.07489e-06	1.14166	6.52265e-06
1.1441	3.05209e-06	1.1441	4.10388e-06	1.1441	6.58979e-06
1.14655	3.05941e-06	1.14655	4.12952e-06	1.14655	6.65083e-06
1.14899	3.07223e-06	1.14899	4.1576e-06	1.14899	6.71797e-06
1.15143	3.08138e-06	1.15143	4.18415e-06	1.15143	6.78205e-06
1.15387	3.09176e-06	1.15387	4.21497e-06	1.15387	6.85224e-06
1.15631	3.09969e-06	1.15631	4.24182e-06	1.15631	6.91328e-06
1.15875	3.10549e-06	1.15875	4.27021e-06	1.15875	6.98042e-06
1.16119	3.11495e-06	1.16119	4.30072e-06	1.16119	7.04756e-06
1.16364	3.12563e-06	1.16364	4.33033e-06	1.16364	7.11775e-06
1.16608	3.13204e-06	1.16608	4.35718e-06	1.16608	7.18488e-06
1.16852	3.13937e-06	1.16852	4.38983e-06	1.16852	7.25508e-06
1.17096	3.15066e-06	1.17096	4.41913e-06	1.17096	7.32221e-06
1.1734	3.16042e-06	1.1734	4.45117e-06	1.1734	7.3924e-06
1.17584	3.16927e-06	1.17584	4.48139e-06	1.17584	7.45954e-06
1.17828	3.17721e-06	1.17828	4.51343e-06	1.17828	7.52973e-06
1.18073	3.1885e-06	1.18073	4.54547e-06	1.18073	7.59992e-06
1.18317	3.19887e-06	1.18317	4.57874e-06	1.18317	7.67317e-06
1.18561	3.21047e-06	1.18561	4.61261e-06	1.18561	7.7403e-06
1.18805	3.22481e-06	1.18805	4.64405e-06	1.18805	7.81355e-06
1.19049	3.23611e-06	1.19049	4.67762e-06	1.19049	7.88374e-06
1.19293	3.25075e-06	1.19293	4.71118e-06	1.19293	7.95698e-06
1.19537	3.26327e-06	1.19537	4.74567e-06	1.19537	8.02717e-06
1.19781	3.27608e-06	1.19781	4.77893e-06	1.19781	8.10041e-06
1.20026	3.28951e-06	1.20026	4.81494e-06	1.20026	8.17365e-06
1.2027	3.30172e-06	1.2027	4.85218e-06	1.2027	8.24995e-06
1.20514	3.31545e-06	1.20514	4.88697e-06	1.20514	8.32014e-06
1.20758	3.32918e-06	1.20758	4.92481e-06	1.20758	8.39643e-06
1.21002	3.342e-06	1.21002	4.96021e-06	1.21002	8.46967e-06
1.21246	3.35574e-06	1.21246	4.99744e-06	1.21246	8.54597e-06
1.2149	3.37008e-06	1.2149	5.03345e-06	1.2149	8.61921e-06
1.21735	3.38625e-06	1.21735	5.07312e-06	1.21735	8.6955e-06
1.21979	3.40182e-06	1.21979	5.11096e-06	1.21979	8.7718e-06
1.22223	3.41799e-06	1.22223	5.14972e-06	1.22223	8.85114e-06
1.22467	3.43264e-06	1.22467	5.18848e-06	1.22467	8.92744e-06
1.22711	3.45126e-06	1.22711	5.22968e-06	1.22711	9.00678e-06
1.22955	3.46651e-06	1.22955	5.26813e-06	1.22955	9.08308e-06
1.23199	3.48543e-06	1.23199	5.30963e-06	1.23199	9.16548e-06
1.23444	3.50375e-06	1.23444	5.34931e-06	1.23444	9.24177e-06
1.23688	3.52084e-06	1.23688	5.39142e-06	1.23688	9.32417e-06
1.23932	3.54006e-06	1.23932	5.43109e-06	1.23932	9.40351e-06
1.24176	3.55898e-06	1.24176	5.47596e-06	1.24176	9.48591e-06
1.2442	3.57668e-06	1.2442	5.51563e-06	1.2442	9.5622e-06
1.24664	3.59438e-06	1.24664	5.55927e-06	1.24664	9.64765e-06
1.24908	3.61147e-06	1.24908	5.60138e-06	1.24908	9.73005e-06
1.25153	3.62978e-06	1.25153	5.64655e-06	1.25153	9.8094e-06
1.25397	3.64901e-06	1.25397	5.68927e-06	1.25397	9.88874e-06
1.25641	3.66854e-06	1.25641	5.73505e-06	1.25641	9.97114e-06
1.25885	3.68838e-06	1.25885	5.78083e-06	1.25885	1.00566e-05
1.26129	3.70913e-06	1.26129	5.8266e-06	1.26129	1.0142e-05
1.26373	3.72866e-06	1.26373	5.87238e-06	1.26373	1.02275e-05
1.26617	3.75155e-06	1.26617	5.91815e-06	1.26617	1.0316e-05
1.26862	3.77077e-06	1.26862	5.96393e-06	1.26862	1.03984e-05
1.27106	3.79488e-06	1.27106	6.01276e-06	1.27106	1.04869e-05
1.2735	3.81594e-06	1.2735	6.06159e-06	1.2735	1.05693e-05
1.27594	3.84066e-06	1.27594	6.10736e-06	1.27594	1.06578e-05
1.27838	3.86233e-06	1.27838	6.15619e-06	1.27838	1.07463e-05
1.28082	3.88796e-06	1.28082	6.20502e-06	1.28082	1.08378e-05
1.28326	3.91116e-06	1.28326	6.25385e-06	1.28326	1.09263e-05
1.28571	3.93832e-06	1.28571	6.30573e-06	1.28571	1.10148e-05
1.28815	3.96578e-06	1.28815	6.35456e-06	1.28815	1.11064e-05
1.29059	3.98928e-06	1.29059	6.40644e-06	1.29059	1.11979e-05
1.29303	4.01461e-06	1.29303	6.45526e-06	1.29303	1.12864e-05
1.29547	4.04085e-06	1.29547	6.50714e-06	1.29547	1.13749e-05
1.29791	4.06618e-06	1.29791	6.55902e-06	1.29791	1.14665e-05
1.30035	4.09365e-06	1.30035	6.61396e-06	1.30035	1.15611e-05
1.3028	4.12081e-06	1.3028	6.66584e-06	1.3028	1.16496e-05
1.30524	4.14889e-06	1.30524	6.71772e-06	1.30524	1.17473e-05
1.30768	4.17666e-06	1.30768	6.77265e-06	1.30768	1.18388e-05
1.31012	4.20595e-06	1.31012	6.82758e-06	1.31012	1.19365e-05
1.31256	4.23342e-06	1.31256	6.87946e-06	1.31256	1.2028e-05
1.315	4.26089e-06	1.315	6.93439e-06	1.315	1.21226e-05
1.31744	4.29018e-06	1.31744	6.99237e-06	1.31744	1.22203e-05
1.31989	4.32131e-06	1.31989	7.05036e-06	1.31989	1.2321e-05
1.32233	4.34817e-06	1.32233	7.10529e-06	1.32233	1.24156e-05
1.32477	4.37655e-06	1.32477	7.16327e-06	1.32477	1.25163e-05
1.32721	4.40554e-06	1.32721	7.2182e-06	1.32721	1.2614e-05
1.32965	4.43789e-06	1.32965	7.27924e-06	1.32965	1.27177e-05
1.33209	4.46719e-06	1.33209	7.33722e-06	1.33209	1.28184e-05
1.33453	4.50075e-06	1.33453	7.39521e-06	1.33453	1.29191e-05
1.33698	4.53188e-06	1.33698	7.45319e-06	1.33698	1.30198e-05
1.33942	4.56789e-06	1.33942	7.51422e-06	1.33942	1.31267e-05
1.34186	4.59963e-06	1.34186	7.57221e-06	1.34186	1.32304e-05
1.3443	4.63503e-06	1.3443	7.63629e-06	1.3443	1.33372e-05
1.34674	4.66616e-06	1.34674	7.69733e-06	1.34674	1.3441e-05
1.34918	4.70278e-06	1.34918	7.76142e-06	1.34918	1.35509e-05
1.35162	4.73238e-06	1.35162	7.8194e-06	1.35162	1.36516e-05
1.35406	4.76687e-06	1.35406	7.88349e-06	1.35406	1.37584e-05
1.35651	4.80013e-06	1.35651	7.94757e-06	1.35651	1.38682e-05
1.35895	4.83645e-06	1.35895	8.01166e-06	1.35895	1.39781e-05
1.36139	4.86971e-06	1.36139	8.07575e-06	1.36139	1.40819e-05
1.36383	4.90725e-06	1.36383	8.14289e-06	1.36383	1.41948e-05
1.36627	4.94326e-06	1.36627	8.20697e-06	1.36627	1.42985e-05
1.36871	4.98141e-06	1.36871	8.27106e-06	1.36871	1.44114e-05
1.37115	5.01986e-06	1.37115	8.34125e-06	1.37115	1.45183e-05
1.3736	5.05831e-06	1.3736	8.40534e-06	1.3736	1.46281e-05
1.37604	5.09829e-06	1.37604	8.47553e-06	1.37604	1.4741e-05
1.37848	5.14284e-06	1.37848	8.54572e-06	1.37848	1.4854e-05
1.38092	5.18099e-06	1.38092	8.61286e-06	1.38092	1.49638e-05
1.38336	5.2225e-06	1.38336	8.6861e-06	1.38336	1.50828e-05
1.3858	5.26278e-06	1.3858	8.75629e-06	1.3858	1.51957e-05
1.38824	5.30886e-06	1.38824	8.82953e-06	1.38824	1.53117e-05
1.39069	5.35097e-06	1.39069	8.89972e-06	1.39069	1.54246e-05
1.39313	5.39431e-06	1.39313	8.97296e-06	1.39313	1.55436e-05
1.39557	5.43887e-06	1.39557	9.04621e-06	1.39557	1.56627e-05
1.39801	5.48281e-06	1.39801	9.1225e-06	1.39801	1.57847e-05
1.40045	5.52401e-06	1.40045	9.19269e-06	1.40045	1.59007e-05
1.40289	5.57314e-06	1.40289	9.27204e-06	1.40289	1.60228e-05
1.40533	5.61678e-06	1.40533	9.34528e-06	1.40533	1.61418e-05
1.40778	5.66225e-06	1.40778	9.42462e-06	1.40778	1.62639e-05
1.41022	5.71047e-06	1.41022	9.50092e-06	1.41022	1.63859e-05
1.41266	5.7596e-06	1.41266	9.57721e-06	1.41266	1.65111e-05
1.4151	5.8121e-06	1.4151	9.65656e-06	1.4151	1.66362e-05
1.41754	5.86703e-06	1.41754	9.73896e-06	1.41754	1.67644e-05
1.41998	5.9128e-06	1.41998	9.81525e-06	1.41998	1.68895e-05
1.42242	5.96468e-06	1.42242	9.89765e-06	1.42242	1.70207e-05
1.42487	6.01656e-06	1.42487	9.97699e-06	1.42487	1.71458e-05
1.42731	6.06844e-06	1.42731	1.00594e-05	1.42731	1.72801e-05
1.42975	6.12032e-06	1.42975	1.01387e-05	1.42975	1.74052e-05
1.43219	6.17525e-06	1.43219	1.02242e-05	1.43219	1.75395e-05
1.43463	6.23019e-06	1.43463	1.03066e-05	1.43463	1.76738e-05
1.43707	6.28207e-06	1.43707	1.03951e-05	1.43707	1.78111e-05
1.43951	6.33395e-06	1.43951	1.04775e-05	1.43951	1.79454e-05
1.44196	6.39193e-06	1.44196	1.0569e-05	1.44196	1.80858e-05
1.4444	6.44381e-06	1.4444	1.06545e-05	1.4444	1.8217e-05
1.44684	6.50484e-06	1.44684	1.0743e-05	1.44684	1.83604e-05
1.44928	6.56283e-06	1.44928	1.08315e-05	1.44928	1.84978e-05
1.45172	6.62386e-06	1.45172	1.0923e-05	1.45172	1.86381e-05
1.45416	6.68185e-06	1.45416	1.10146e-05	1.45416	1.87846e-05
1.4566	6.74288e-06	1.4566	1.11092e-05	1.4566	1.89311e-05
1.45905	6.80086e-06	1.45905	1.11977e-05	1.45905	1.90715e-05
1.46149	6.86495e-06	1.46149	1.12954e-05	1.46149	1.9221e-05
1.46393	6.92293e-06	1.46393	1.13869e-05	1.46393	1.93614e-05
1.46637	6.99007e-06	1.46637	1.14846e-05	1.46637	1.9517e-05
1.46881	7.05111e-06	1.46881	1.15792e-05	1.46881	1.96635e-05
1.47125	7.11825e-06	1.47125	1.16768e-05	1.47125	1.98131e-05
1.47369	7.18233e-06	1.47369	1.17745e-05	1.47369	1.99656e-05
1.47614	7.24947e-06	1.47614	1.18752e-05	1.47614	2.01243e-05
1.47858	7.31356e-06	1.47858	1.19728e-05	1.47858	2.02769e-05
1.48102	7.3807e-06	1.48102	1.20797e-05	1.48102	2.04356e-05
1.48346	7.44479e-06	1.48346	1.21773e-05	1.48346	2.05913e-05
1.4859	7.51192e-06	1.4859	1.22811e-05	1.4859	2.07499e-05
1.48834	7.57601e-06	1.48834	1.23848e-05	1.48834	2.09086e-05
1.49078	7.6462e-06	1.49078	1.24916e-05	1.49078	2.10673e-05
1.49323	7.71334e-06	1.49323	1.25985e-05	1.49323	2.12321e-05
1.49567	7.78658e-06	1.49567	1.27083e-05	1.49567	2.14e-05
1.49811	7.85372e-06	1.49811	1.28151e-05	1.49811	2.15617e-05
1.50055	7.92696e-06	1.50055	1.2925e-05	1.50055	2.17326e-05

## Sheet: Figure S10(d)
-1.4975	-3.65557e-05	-1.4975	-1.03753e-05	-1.4975	-1.01022e-05
-1.49506	-2.96313e-05	-1.49506	-3.70547e-05	-1.49506	-6.21203e-05
-1.49261	-2.56457e-05	-1.49261	-3.32278e-05	-1.49261	-5.59191e-05
-1.49017	-2.3012e-05	-1.49017	-3.06429e-05	-1.49017	-5.15246e-05
-1.48773	-2.11016e-05	-1.48773	-2.87112e-05	-1.48773	-4.8244e-05
-1.48529	-1.9649e-05	-1.48529	-2.71975e-05	-1.48529	-4.56072e-05
-1.48285	-1.84924e-05	-1.48285	-2.59554e-05	-1.48285	-4.34222e-05
-1.48041	-1.75341e-05	-1.48041	-2.49026e-05	-1.48041	-4.15789e-05
-1.47797	-1.67224e-05	-1.47797	-2.39932e-05	-1.47797	-3.99829e-05
-1.47552	-1.60204e-05	-1.47552	-2.31936e-05	-1.47552	-3.83898e-05
-1.47308	-1.5404e-05	-1.47308	-2.24764e-05	-1.47308	-3.71295e-05
-1.47064	-1.4873e-05	-1.47064	-2.18295e-05	-1.47064	-3.60064e-05
-1.4682	-1.43817e-05	-1.4682	-2.12435e-05	-1.4682	-3.49688e-05
-1.46576	-1.39453e-05	-1.46576	-2.07064e-05	-1.46576	-3.40289e-05
-1.46332	-1.35302e-05	-1.46332	-2.02059e-05	-1.46332	-3.315e-05
-1.46088	-1.31487e-05	-1.46088	-1.97482e-05	-1.46088	-3.23412e-05
-1.45844	-1.27978e-05	-1.45844	-1.93179e-05	-1.45844	-3.15844e-05
-1.45599	-1.24835e-05	-1.45599	-1.89089e-05	-1.45599	-3.08734e-05
-1.45355	-1.21905e-05	-1.45355	-1.85214e-05	-1.45355	-3.0202e-05
-1.45111	-1.19067e-05	-1.45111	-1.81673e-05	-1.45111	-2.95703e-05
-1.44867	-1.1632e-05	-1.44867	-1.78225e-05	-1.44867	-2.8963e-05
-1.44623	-1.13726e-05	-1.44623	-1.7496e-05	-1.44623	-2.84014e-05
-1.44379	-1.11346e-05	-1.44379	-1.71877e-05	-1.44379	-2.78521e-05
-1.44135	-1.09088e-05	-1.44135	-1.68856e-05	-1.44135	-2.73394e-05
-1.4389	-1.06921e-05	-1.4389	-1.66018e-05	-1.4389	-2.6842e-05
-1.43646	-1.04815e-05	-1.43646	-1.63302e-05	-1.43646	-2.6369e-05
-1.43402	-1.02801e-05	-1.43402	-1.60616e-05	-1.43402	-2.59081e-05
-1.43158	-1.00909e-05	-1.43158	-1.58114e-05	-1.43158	-2.54748e-05
-1.42914	-9.91083e-06	-1.42914	-1.55673e-05	-1.42914	-2.50445e-05
-1.4267	-9.73383e-06	-1.4267	-1.53292e-05	-1.4267	-2.46417e-05
-1.42426	-9.56293e-06	-1.42426	-1.51003e-05	-1.42426	-2.42449e-05
-1.42181	-9.40119e-06	-1.42181	-1.48837e-05	-1.42181	-2.38665e-05
-1.41937	-9.24249e-06	-1.41937	-1.467e-05	-1.41937	-2.34973e-05
-1.41693	-9.08685e-06	-1.41693	-1.44625e-05	-1.41693	-2.31402e-05
-1.41449	-8.93732e-06	-1.41449	-1.4258e-05	-1.41449	-2.27862e-05
-1.41205	-8.79389e-06	-1.41205	-1.40658e-05	-1.41205	-2.24566e-05
-1.40961	-8.65656e-06	-1.40961	-1.38705e-05	-1.40961	-2.2124e-05
-1.40717	-8.52533e-06	-1.40717	-1.36843e-05	-1.40717	-2.18066e-05
-1.40472	-8.39716e-06	-1.40472	-1.35012e-05	-1.40472	-2.14984e-05
-1.40228	-8.27509e-06	-1.40228	-1.33212e-05	-1.40228	-2.11962e-05
-1.39984	-8.15607e-06	-1.39984	-1.31472e-05	-1.39984	-2.09033e-05
-1.3974	-8.03705e-06	-1.3974	-1.29763e-05	-1.3974	-2.06133e-05
-1.39496	-7.92108e-06	-1.39496	-1.28054e-05	-1.39496	-2.03295e-05
-1.39252	-7.81122e-06	-1.39252	-1.26437e-05	-1.39252	-2.00579e-05
-1.39008	-7.6983e-06	-1.39008	-1.24819e-05	-1.39008	-1.97833e-05
-1.38763	-7.59149e-06	-1.38763	-1.23263e-05	-1.38763	-1.95269e-05
-1.38519	-7.48773e-06	-1.38519	-1.21737e-05	-1.38519	-1.92706e-05
-1.38275	-7.38703e-06	-1.38275	-1.20242e-05	-1.38275	-1.90203e-05
-1.38031	-7.28327e-06	-1.38031	-1.18807e-05	-1.38031	-1.87762e-05
-1.37787	-7.19171e-06	-1.37787	-1.17342e-05	-1.37787	-1.85351e-05
-1.37543	-7.10321e-06	-1.37543	-1.15908e-05	-1.37543	-1.82971e-05
-1.37299	-7.01471e-06	-1.37299	-1.14565e-05	-1.37299	-1.80682e-05
-1.37054	-6.91705e-06	-1.37054	-1.13162e-05	-1.37054	-1.78393e-05
-1.3681	-6.82855e-06	-1.3681	-1.1188e-05	-1.3681	-1.76196e-05
-1.36566	-6.7431e-06	-1.36566	-1.10537e-05	-1.36566	-1.73968e-05
-1.36322	-6.66681e-06	-1.36322	-1.09286e-05	-1.36322	-1.71862e-05
-1.36078	-6.58441e-06	-1.36078	-1.08035e-05	-1.36078	-1.69756e-05
-1.35834	-6.50812e-06	-1.35834	-1.06844e-05	-1.35834	-1.67681e-05
-1.3559	-6.42572e-06	-1.3559	-1.05624e-05	-1.3559	-1.65606e-05
-1.35345	-6.35248e-06	-1.35345	-1.04495e-05	-1.35345	-1.63653e-05
-1.35101	-6.27313e-06	-1.35101	-1.03335e-05	-1.35101	-1.61639e-05
-1.34857	-6.20294e-06	-1.34857	-1.02236e-05	-1.34857	-1.59747e-05
-1.34613	-6.1297e-06	-1.34613	-1.01046e-05	-1.34613	-1.57794e-05
-1.34369	-6.05951e-06	-1.34369	-1.00008e-05	-1.34369	-1.55932e-05
-1.34125	-5.98932e-06	-1.34125	-9.88793e-06	-1.34125	-1.54101e-05
-1.33881	-5.92218e-06	-1.33881	-9.77807e-06	-1.33881	-1.5227e-05
-1.33636	-5.85809e-06	-1.33636	-9.6682e-06	-1.33636	-1.50469e-05
-1.33392	-5.79401e-06	-1.33392	-9.56139e-06	-1.33392	-1.4876e-05
-1.33148	-5.72992e-06	-1.33148	-9.45763e-06	-1.33148	-1.47021e-05
-1.32904	-5.66889e-06	-1.32904	-9.35692e-06	-1.32904	-1.45342e-05
-1.3266	-5.60785e-06	-1.3266	-9.25317e-06	-1.3266	-1.43633e-05
-1.32416	-5.54682e-06	-1.32416	-9.15246e-06	-1.32416	-1.41955e-05
-1.32172	-5.48883e-06	-1.32172	-9.0548e-06	-1.32172	-1.40307e-05
-1.31927	-5.43085e-06	-1.31927	-8.95714e-06	-1.31927	-1.3869e-05
-1.31683	-5.37287e-06	-1.31683	-8.85949e-06	-1.31683	-1.37072e-05
-1.31439	-5.31793e-06	-1.31439	-8.76183e-06	-1.31439	-1.35485e-05
-1.31195	-5.25995e-06	-1.31195	-8.66723e-06	-1.31195	-1.33929e-05
-1.30951	-5.20502e-06	-1.30951	-8.57567e-06	-1.30951	-1.32464e-05
-1.30707	-5.15009e-06	-1.30707	-8.48107e-06	-1.30707	-1.30938e-05
-1.30463	-5.09516e-06	-1.30463	-8.39257e-06	-1.30463	-1.29473e-05
-1.30219	-5.04328e-06	-1.30219	-8.30102e-06	-1.30219	-1.27978e-05
-1.29974	-4.98834e-06	-1.29974	-8.21252e-06	-1.29974	-1.26574e-05
-1.2973	-4.93341e-06	-1.2973	-8.12401e-06	-1.2973	-1.25109e-05
-1.29486	-4.88764e-06	-1.29486	-8.04162e-06	-1.29486	-1.23705e-05
-1.29242	-4.84003e-06	-1.29242	-7.95312e-06	-1.29242	-1.22302e-05
-1.28998	-4.79639e-06	-1.28998	-7.87072e-06	-1.28998	-1.20928e-05
-1.28754	-4.7558e-06	-1.28754	-7.78832e-06	-1.28754	-1.19586e-05
-1.2851	-4.72101e-06	-1.2851	-7.70592e-06	-1.2851	-1.18273e-05
-1.28265	-4.68256e-06	-1.28265	-7.62658e-06	-1.28265	-1.16961e-05
-1.28021	-4.63587e-06	-1.28021	-7.54418e-06	-1.28021	-1.15649e-05
-1.27777	-4.59131e-06	-1.27777	-7.46484e-06	-1.27777	-1.14337e-05
-1.27533	-4.54614e-06	-1.27533	-7.38549e-06	-1.27533	-1.13085e-05
-1.27289	-4.50342e-06	-1.27289	-7.30614e-06	-1.27289	-1.11773e-05
-1.27045	-4.46375e-06	-1.27045	-7.2329e-06	-1.27045	-1.10552e-05
-1.26801	-4.42285e-06	-1.26801	-7.15356e-06	-1.26801	-1.09301e-05
-1.26556	-4.38532e-06	-1.26556	-7.08031e-06	-1.26556	-1.08111e-05
-1.26312	-4.35175e-06	-1.26312	-7.00707e-06	-1.26312	-1.0689e-05
-1.26068	-4.31696e-06	-1.26068	-6.93078e-06	-1.26068	-1.057e-05
-1.25824	-4.2782e-06	-1.25824	-6.85448e-06	-1.25824	-1.04479e-05
-1.2558	-4.24463e-06	-1.2558	-6.78124e-06	-1.2558	-1.0335e-05
-1.25336	-4.20892e-06	-1.25336	-6.708e-06	-1.25336	-1.0216e-05
-1.25092	-4.17597e-06	-1.25092	-6.63781e-06	-1.25092	-1.01031e-05
-1.24847	-4.1427e-06	-1.24847	-6.56762e-06	-1.24847	-9.99017e-06
-1.24603	-4.10883e-06	-1.24603	-6.49743e-06	-1.24603	-9.88031e-06
-1.24359	-4.07434e-06	-1.24359	-6.42724e-06	-1.24359	-9.77045e-06
-1.24115	-4.0426e-06	-1.24115	-6.3601e-06	-1.24115	-9.65753e-06
-1.23871	-4.00751e-06	-1.23871	-6.28991e-06	-1.23871	-9.54767e-06
-1.23627	-3.97577e-06	-1.23627	-6.22582e-06	-1.23627	-9.44086e-06
-1.23383	-3.94159e-06	-1.23383	-6.15868e-06	-1.23383	-9.33099e-06
-1.23138	-3.91016e-06	-1.23138	-6.0946e-06	-1.23138	-9.22724e-06
-1.22894	-3.88391e-06	-1.22894	-6.03051e-06	-1.22894	-9.12042e-06
-1.2265	-3.85431e-06	-1.2265	-5.96337e-06	-1.2265	-9.01361e-06
-1.22406	-3.82654e-06	-1.22406	-5.90539e-06	-1.22406	-8.9129e-06
-1.22162	-3.79572e-06	-1.22162	-5.8413e-06	-1.22162	-8.80914e-06
-1.21918	-3.76917e-06	-1.21918	-5.77721e-06	-1.21918	-8.70538e-06
-1.21674	-3.74323e-06	-1.21674	-5.71923e-06	-1.21674	-8.60773e-06
-1.21429	-3.71515e-06	-1.21429	-5.65514e-06	-1.21429	-8.50397e-06
-1.21185	-3.69287e-06	-1.21185	-5.60021e-06	-1.21185	-8.40631e-06
-1.20941	-3.66663e-06	-1.20941	-5.53918e-06	-1.20941	-8.3056e-06
-1.20697	-3.6413e-06	-1.20697	-5.47814e-06	-1.20697	-8.20795e-06
-1.20453	-3.61566e-06	-1.20453	-5.41711e-06	-1.20453	-8.11029e-06
-1.20209	-3.59247e-06	-1.20209	-5.36217e-06	-1.20209	-8.00958e-06
-1.19965	-3.56897e-06	-1.19965	-5.30114e-06	-1.19965	-7.91193e-06
-1.1972	-3.547e-06	-1.1972	-5.24316e-06	-1.1972	-7.82037e-06
-1.19476	-3.52319e-06	-1.19476	-5.18822e-06	-1.19476	-7.71967e-06
-1.19232	-3.50214e-06	-1.19232	-5.13573e-06	-1.19232	-7.62506e-06
-1.18988	-3.47711e-06	-1.18988	-5.07439e-06	-1.18988	-7.52741e-06
-1.18744	-3.45514e-06	-1.18744	-5.01794e-06	-1.18744	-7.43585e-06
-1.185	-3.43012e-06	-1.185	-4.963e-06	-1.185	-7.34125e-06
-1.18256	-3.40692e-06	-1.18256	-4.90655e-06	-1.18256	-7.24664e-06
-1.18011	-3.38464e-06	-1.18011	-4.85161e-06	-1.18011	-7.15509e-06
-1.17767	-3.36328e-06	-1.17767	-4.7979e-06	-1.17767	-7.06659e-06
-1.17523	-3.34162e-06	-1.17523	-4.7445e-06	-1.17523	-6.97199e-06
-1.17279	-3.3172e-06	-1.17279	-4.6917e-06	-1.17279	-6.88349e-06
-1.17035	-3.29248e-06	-1.17035	-4.63647e-06	-1.17035	-6.79193e-06
-1.16791	-3.27142e-06	-1.16791	-4.58489e-06	-1.16791	-6.70343e-06
-1.16547	-3.24823e-06	-1.16547	-4.53179e-06	-1.16547	-6.61493e-06
-1.16302	-3.22595e-06	-1.16302	-4.48113e-06	-1.16302	-6.52643e-06
-1.16058	-3.20184e-06	-1.16058	-4.42712e-06	-1.16058	-6.44098e-06
-1.15814	-3.17987e-06	-1.15814	-4.37951e-06	-1.15814	-6.35553e-06
-1.1557	-3.15607e-06	-1.1557	-4.32702e-06	-1.1557	-6.26703e-06
-1.15326	-3.13349e-06	-1.15326	-4.27636e-06	-1.15326	-6.18463e-06
-1.15082	-3.11487e-06	-1.15082	-4.22509e-06	-1.15082	-6.09613e-06
-1.14838	-3.09717e-06	-1.14838	-4.17565e-06	-1.14838	-6.01373e-06
-1.14594	-3.07886e-06	-1.14594	-4.12591e-06	-1.14594	-5.93134e-06
-1.14349	-3.06268e-06	-1.14349	-4.07616e-06	-1.14349	-5.84589e-06
-1.14105	-3.04315e-06	-1.14105	-4.02764e-06	-1.14105	-5.76044e-06
-1.13861	-3.02667e-06	-1.13861	-3.98064e-06	-1.13861	-5.68109e-06
-1.13617	-3.00928e-06	-1.13617	-3.93212e-06	-1.13617	-5.5987e-06
-1.13373	-2.99066e-06	-1.13373	-3.88695e-06	-1.13373	-5.51935e-06
-1.13129	-2.97144e-06	-1.13129	-3.83965e-06	-1.13129	-5.43695e-06
-1.12885	-2.95496e-06	-1.12885	-3.79449e-06	-1.12885	-5.36066e-06
-1.1264	-2.93421e-06	-1.1264	-3.74688e-06	-1.1264	-5.27826e-06
-1.12396	-2.91681e-06	-1.12396	-3.70141e-06	-1.12396	-5.20197e-06
-1.12152	-2.89697e-06	-1.12152	-3.65746e-06	-1.12152	-5.11957e-06
-1.11908	-2.88141e-06	-1.11908	-3.61535e-06	-1.11908	-5.04328e-06
-1.11664	-2.86493e-06	-1.11664	-3.57049e-06	-1.11664	-4.96698e-06
-1.1142	-2.84876e-06	-1.1142	-3.53051e-06	-1.1142	-4.89374e-06
-1.11176	-2.82984e-06	-1.11176	-3.48687e-06	-1.11176	-4.82294e-06
-1.10931	-2.81183e-06	-1.10931	-3.44323e-06	-1.10931	-4.74878e-06
-1.10687	-2.79413e-06	-1.10687	-3.40264e-06	-1.10687	-4.67249e-06
-1.10443	-2.77551e-06	-1.10443	-3.36083e-06	-1.10443	-4.60108e-06
-1.10199	-2.75842e-06	-1.10199	-3.32177e-06	-1.10199	-4.52783e-06
-1.09955	-2.74133e-06	-1.09955	-3.28088e-06	-1.09955	-4.45978e-06
-1.09711	-2.72669e-06	-1.09711	-3.2412e-06	-1.09711	-4.38806e-06
-1.09467	-2.71143e-06	-1.09467	-3.20153e-06	-1.09467	-4.3197e-06
-1.09222	-2.69525e-06	-1.09222	-3.16186e-06	-1.09222	-4.25043e-06
-1.08978	-2.67816e-06	-1.08978	-3.12432e-06	-1.08978	-4.18421e-06
-1.08734	-2.6626e-06	-1.08734	-3.08648e-06	-1.08734	-4.11737e-06
-1.0849	-2.64734e-06	-1.0849	-3.05047e-06	-1.0849	-4.05115e-06
-1.08246	-2.63239e-06	-1.08246	-3.01232e-06	-1.08246	-3.98401e-06
-1.08002	-2.61804e-06	-1.08002	-2.97631e-06	-1.08002	-3.92114e-06
-1.07758	-2.60339e-06	-1.07758	-2.93847e-06	-1.07758	-3.85706e-06
-1.07513	-2.58875e-06	-1.07513	-2.90307e-06	-1.07513	-3.79541e-06
-1.07269	-2.5744e-06	-1.07269	-2.86736e-06	-1.07269	-3.73224e-06
-1.07025	-2.55975e-06	-1.07025	-2.8344e-06	-1.07025	-3.67365e-06
-1.06781	-2.54755e-06	-1.06781	-2.799e-06	-1.06781	-3.61566e-06
-1.06537	-2.53565e-06	-1.06537	-2.76482e-06	-1.06537	-3.55798e-06
-1.06293	-2.521e-06	-1.06293	-2.72912e-06	-1.06293	-3.49878e-06
-1.06049	-2.50757e-06	-1.06049	-2.69829e-06	-1.06049	-3.44354e-06
-1.05804	-2.49231e-06	-1.05804	-2.66625e-06	-1.05804	-3.38861e-06
-1.0556	-2.48193e-06	-1.0556	-2.63512e-06	-1.0556	-3.33368e-06
-1.05316	-2.46942e-06	-1.05316	-2.60216e-06	-1.05316	-3.27936e-06
-1.05072	-2.45447e-06	-1.05072	-2.57256e-06	-1.05072	-3.22626e-06
-1.04828	-2.44226e-06	-1.04828	-2.54327e-06	-1.04828	-3.17651e-06
-1.04584	-2.42822e-06	-1.04584	-2.51397e-06	-1.04584	-3.12219e-06
-1.0434	-2.4148e-06	-1.0434	-2.4862e-06	-1.0434	-3.06909e-06
-1.04095	-2.40137e-06	-1.04095	-2.45629e-06	-1.04095	-3.01965e-06
-1.03851	-2.38611e-06	-1.03851	-2.42608e-06	-1.03851	-2.96991e-06
-1.03607	-2.3739e-06	-1.03607	-2.40044e-06	-1.03607	-2.91986e-06
-1.03363	-2.36109e-06	-1.03363	-2.37267e-06	-1.03363	-2.86981e-06
-1.03119	-2.35193e-06	-1.03119	-2.34795e-06	-1.03119	-2.82282e-06
-1.02875	-2.34216e-06	-1.02875	-2.3214e-06	-1.02875	-2.7746e-06
-1.02631	-2.32965e-06	-1.02631	-2.29394e-06	-1.02631	-2.7273e-06
-1.02386	-2.31561e-06	-1.02386	-2.26922e-06	-1.02386	-2.6803e-06
-1.02142	-2.30219e-06	-1.02142	-2.24358e-06	-1.02142	-2.63666e-06
-1.01898	-2.29334e-06	-1.01898	-2.21673e-06	-1.01898	-2.59149e-06
-1.01654	-2.28174e-06	-1.01654	-2.19414e-06	-1.01654	-2.54724e-06
-1.0141	-2.26984e-06	-1.0141	-2.16881e-06	-1.0141	-2.50238e-06
-1.01166	-2.25702e-06	-1.01166	-2.14654e-06	-1.01166	-2.46027e-06
-1.00922	-2.24451e-06	-1.00922	-2.12243e-06	-1.00922	-2.41754e-06
-1.00677	-2.23261e-06	-1.00677	-2.09984e-06	-1.00677	-2.37543e-06
-1.00433	-2.22009e-06	-1.00433	-2.07696e-06	-1.00433	-2.33392e-06
-1.00189	-2.20911e-06	-1.00189	-2.05498e-06	-1.00189	-2.29486e-06
-0.99945	-2.20056e-06	-0.99945	-2.0324e-06	-0.99945	-2.25305e-06
-0.99701	-2.1908e-06	-0.99701	-2.01195e-06	-0.99701	-2.2146e-06
-0.99457	-2.17859e-06	-0.99457	-1.98846e-06	-0.99457	-2.17523e-06
-0.99213	-2.16516e-06	-0.99213	-1.96953e-06	-0.99213	-2.1377e-06
-0.98969	-2.15448e-06	-0.98969	-1.94726e-06	-0.98969	-2.10108e-06
-0.98724	-2.14166e-06	-0.98724	-1.92681e-06	-0.98724	-2.06506e-06
-0.9848	-2.13068e-06	-0.9848	-1.90667e-06	-0.9848	-2.02814e-06
-0.98236	-2.11878e-06	-0.98236	-1.88836e-06	-0.98236	-1.99426e-06
-0.97992	-2.11084e-06	-0.97992	-1.86822e-06	-0.97992	-1.95764e-06
-0.97748	-2.10199e-06	-0.97748	-1.84838e-06	-0.97748	-1.92529e-06
-0.97504	-2.09131e-06	-0.97504	-1.82915e-06	-0.97504	-1.89172e-06
-0.9726	-2.07941e-06	-0.9726	-1.80962e-06	-0.9726	-1.85816e-06
-0.97015	-2.06903e-06	-0.97015	-1.79009e-06	-0.97015	-1.8255e-06
-0.96771	-2.05805e-06	-0.96771	-1.77087e-06	-0.96771	-1.79559e-06
-0.96527	-2.04767e-06	-0.96527	-1.75317e-06	-0.96527	-1.76325e-06
-0.96283	-2.03668e-06	-0.96283	-1.73608e-06	-0.96283	-1.73242e-06
-0.96039	-2.02509e-06	-0.96039	-1.71502e-06	-0.96039	-1.7016e-06
-0.95795	-2.0141e-06	-0.95795	-1.70159e-06	-0.95795	-1.67322e-06
-0.95551	-2.0025e-06	-0.95551	-1.68359e-06	-0.95551	-1.64362e-06
-0.95306	-1.99732e-06	-0.95306	-1.66588e-06	-0.95306	-1.61463e-06
-0.95062	-1.98572e-06	-0.95062	-1.64941e-06	-0.95062	-1.58624e-06
-0.94818	-1.97778e-06	-0.94818	-1.63445e-06	-0.94818	-1.55817e-06
-0.94574	-1.96558e-06	-0.94574	-1.6198e-06	-0.94574	-1.53223e-06
-0.9433	-1.95642e-06	-0.9433	-1.60332e-06	-0.9433	-1.50507e-06
-0.94086	-1.94879e-06	-0.94086	-1.58715e-06	-0.94086	-1.47699e-06
-0.93842	-1.93903e-06	-0.93842	-1.5722e-06	-0.93842	-1.45349e-06
-0.93597	-1.92804e-06	-0.93597	-1.55694e-06	-0.93597	-1.42755e-06
-0.93353	-1.91766e-06	-0.93353	-1.54351e-06	-0.93353	-1.40131e-06
-0.93109	-1.90729e-06	-0.93109	-1.52734e-06	-0.93109	-1.37689e-06
-0.92865	-1.89874e-06	-0.92865	-1.5133e-06	-0.92865	-1.35248e-06
-0.92621	-1.88928e-06	-0.92621	-1.50048e-06	-0.92621	-1.32868e-06
-0.92377	-1.8786e-06	-0.92377	-1.48644e-06	-0.92377	-1.30579e-06
-0.92133	-1.87006e-06	-0.92133	-1.47149e-06	-0.92133	-1.28107e-06
-0.91888	-1.86151e-06	-0.91888	-1.45928e-06	-0.91888	-1.2594e-06
-0.91644	-1.85327e-06	-0.91644	-1.44524e-06	-0.91644	-1.23773e-06
-0.914	-1.84442e-06	-0.914	-1.43212e-06	-0.914	-1.2179e-06
-0.91156	-1.83466e-06	-0.91156	-1.41839e-06	-0.91156	-1.19501e-06
-0.90912	-1.82306e-06	-0.90912	-1.40557e-06	-0.90912	-1.17395e-06
-0.90668	-1.81421e-06	-0.90668	-1.39214e-06	-0.90668	-1.1535e-06
-0.90424	-1.80597e-06	-0.90424	-1.38116e-06	-0.90424	-1.13489e-06
-0.90179	-1.79437e-06	-0.90179	-1.37047e-06	-0.90179	-1.11292e-06
-0.89935	-1.78644e-06	-0.89935	-1.35674e-06	-0.89935	-1.09522e-06
-0.89691	-1.77576e-06	-0.89691	-1.34545e-06	-0.89691	-1.07507e-06
-0.89447	-1.76813e-06	-0.89447	-1.33507e-06	-0.89447	-1.05646e-06
-0.89203	-1.75989e-06	-0.89203	-1.32287e-06	-0.89203	-1.03906e-06
-0.88959	-1.75043e-06	-0.88959	-1.31097e-06	-0.88959	-1.02106e-06
-0.88715	-1.74158e-06	-0.88715	-1.29876e-06	-0.88715	-1.00214e-06
-0.8847	-1.73242e-06	-0.8847	-1.28869e-06	-0.8847	-9.85658e-07
-0.88226	-1.72418e-06	-0.88226	-1.27709e-06	-0.88226	-9.68263e-07
-0.87982	-1.71564e-06	-0.87982	-1.26702e-06	-0.87982	-9.52699e-07
-0.87738	-1.70618e-06	-0.87738	-1.25603e-06	-0.87738	-9.37135e-07
-0.87494	-1.69763e-06	-0.87494	-1.24535e-06	-0.87494	-9.2035e-07
-0.8725	-1.68848e-06	-0.8725	-1.23589e-06	-0.8725	-9.04786e-07
-0.87006	-1.67993e-06	-0.87006	-1.22399e-06	-0.87006	-8.88307e-07
-0.86761	-1.66803e-06	-0.86761	-1.21575e-06	-0.86761	-8.71827e-07
-0.86517	-1.65949e-06	-0.86517	-1.20568e-06	-0.86517	-8.5901e-07
-0.86273	-1.64911e-06	-0.86273	-1.195e-06	-0.86273	-8.42836e-07
-0.86029	-1.63995e-06	-0.86029	-1.18737e-06	-0.86029	-8.30934e-07
-0.85785	-1.6311e-06	-0.85785	-1.17791e-06	-0.85785	-8.15675e-07
-0.85541	-1.62073e-06	-0.85541	-1.16753e-06	-0.85541	-8.00111e-07
-0.85297	-1.61005e-06	-0.85297	-1.16021e-06	-0.85297	-7.85463e-07
-0.85052	-1.6015e-06	-0.85052	-1.15044e-06	-0.85052	-7.73256e-07
-0.84808	-1.59174e-06	-0.84808	-1.14037e-06	-0.84808	-7.62269e-07
-0.84564	-1.58258e-06	-0.84564	-1.13396e-06	-0.84564	-7.47926e-07
-0.8432	-1.57312e-06	-0.8432	-1.12298e-06	-0.8432	-7.34804e-07
-0.84076	-1.56305e-06	-0.84076	-1.11565e-06	-0.84076	-7.24122e-07
-0.83832	-1.5542e-06	-0.83832	-1.10833e-06	-0.83832	-7.10084e-07
-0.83588	-1.54566e-06	-0.83588	-1.1007e-06	-0.83588	-6.99098e-07
-0.83344	-1.53742e-06	-0.83344	-1.09399e-06	-0.83344	-6.87196e-07
-0.83099	-1.52918e-06	-0.83099	-1.08514e-06	-0.83099	-6.75905e-07
-0.82855	-1.52216e-06	-0.82855	-1.07781e-06	-0.82855	-6.65223e-07
-0.82611	-1.51453e-06	-0.82611	-1.0711e-06	-0.82611	-6.54237e-07
-0.82367	-1.50629e-06	-0.82367	-1.06042e-06	-0.82367	-6.40504e-07
-0.82123	-1.49957e-06	-0.82123	-1.05767e-06	-0.82123	-6.31349e-07
-0.81879	-1.49164e-06	-0.81879	-1.0476e-06	-0.81879	-6.20057e-07
-0.81635	-1.48248e-06	-0.81635	-1.0418e-06	-0.81635	-6.09681e-07
-0.8139	-1.47272e-06	-0.8139	-1.0357e-06	-0.8139	-5.98085e-07
-0.81146	-1.46326e-06	-0.81146	-1.02868e-06	-0.81146	-5.89235e-07
-0.80902	-1.45319e-06	-0.80902	-1.02135e-06	-0.80902	-5.78554e-07
-0.80658	-1.44525e-06	-0.80658	-1.01617e-06	-0.80658	-5.69093e-07
-0.80414	-1.4361e-06	-0.80414	-1.00945e-06	-0.80414	-5.57191e-07
-0.8017	-1.42938e-06	-0.8017	-1.00426e-06	-0.8017	-5.48219e-07
-0.79926	-1.42145e-06	-0.79926	-9.97245e-07	-0.79926	-5.38118e-07
-0.79681	-1.41412e-06	-0.79681	-9.92057e-07	-0.79681	-5.31099e-07
-0.79437	-1.40527e-06	-0.79437	-9.85038e-07	-0.79437	-5.20753e-07
-0.79193	-1.39581e-06	-0.79193	-9.79239e-07	-0.79193	-5.11659e-07
-0.78949	-1.3888e-06	-0.78949	-9.73746e-07	-0.78949	-5.02595e-07
-0.78705	-1.37903e-06	-0.78705	-9.67643e-07	-0.78705	-4.94203e-07
-0.78461	-1.37079e-06	-0.78461	-9.61844e-07	-0.78461	-4.85963e-07
-0.78217	-1.36377e-06	-0.78217	-9.57267e-07	-0.78217	-4.76442e-07
-0.77972	-1.35401e-06	-0.77972	-9.52079e-07	-0.77972	-4.67317e-07
-0.77728	-1.34699e-06	-0.77728	-9.4628e-07	-0.77728	-4.59352e-07
-0.77484	-1.33814e-06	-0.77484	-9.40177e-07	-0.77484	-4.5099e-07
-0.7724	-1.3302e-06	-0.7724	-9.33463e-07	-0.7724	-4.42903e-07
-0.76996	-1.32227e-06	-0.76996	-9.28885e-07	-0.76996	-4.34999e-07
-0.76752	-1.31494e-06	-0.76752	-9.23392e-07	-0.76752	-4.27827e-07
-0.76508	-1.30731e-06	-0.76508	-9.17899e-07	-0.76508	-4.17756e-07
-0.76263	-1.29968e-06	-0.76263	-9.14847e-07	-0.76263	-4.11256e-07
-0.76019	-1.29205e-06	-0.76019	-9.08744e-07	-0.76019	-4.03413e-07
-0.75775	-1.2832e-06	-0.75775	-9.05692e-07	-0.75775	-3.96333e-07
-0.75531	-1.27558e-06	-0.75531	-8.98063e-07	-0.75531	-3.90962e-07
-0.75287	-1.26703e-06	-0.75287	-8.94706e-07	-0.75287	-3.82936e-07
-0.75043	-1.2594e-06	-0.75043	-8.87381e-07	-0.75043	-3.74666e-07
-0.74799	-1.25177e-06	-0.74799	-8.8555e-07	-0.74799	-3.70698e-07
-0.74554	-1.24628e-06	-0.74554	-8.80362e-07	-0.74554	-3.6371e-07
-0.7431	-1.23743e-06	-0.7431	-8.76395e-07	-0.7431	-3.57271e-07
-0.74066	-1.23071e-06	-0.74066	-8.72733e-07	-0.74066	-3.51076e-07
-0.73822	-1.22247e-06	-0.73822	-8.6724e-07	-0.73822	-3.44819e-07
-0.73578	-1.21485e-06	-0.73578	-8.64493e-07	-0.73578	-3.39937e-07
-0.73334	-1.20752e-06	-0.73334	-8.58695e-07	-0.73334	-3.34657e-07
-0.7309	-1.19959e-06	-0.7309	-8.55643e-07	-0.7309	-3.29286e-07
-0.72845	-1.19196e-06	-0.72845	-8.51676e-07	-0.72845	-3.24159e-07
-0.72601	-1.1825e-06	-0.72601	-8.48197e-07	-0.72601	-3.18513e-07
-0.72357	-1.17792e-06	-0.72357	-8.43924e-07	-0.72357	-3.12898e-07
-0.72113	-1.17029e-06	-0.72113	-8.39621e-07	-0.72113	-3.08534e-07
-0.71869	-1.16144e-06	-0.71869	-8.38065e-07	-0.71869	-3.04078e-07
-0.71625	-1.15534e-06	-0.71625	-8.35227e-07	-0.71625	-2.9947e-07
-0.71381	-1.14893e-06	-0.71381	-8.30649e-07	-0.71381	-2.93397e-07
-0.71136	-1.13977e-06	-0.71136	-8.28666e-07	-0.71136	-2.87965e-07
-0.70892	-1.13245e-06	-0.70892	-8.26346e-07	-0.70892	-2.85035e-07
-0.70648	-1.12329e-06	-0.70648	-8.2183e-07	-0.70648	-2.80305e-07
-0.70404	-1.11566e-06	-0.70404	-8.18656e-07	-0.70404	-2.76094e-07
-0.7016	-1.10834e-06	-0.7016	-8.15757e-07	-0.7016	-2.69502e-07
-0.69916	-1.10254e-06	-0.69916	-8.11271e-07	-0.69916	-2.6468e-07
-0.69672	-1.09552e-06	-0.69672	-8.09714e-07	-0.69672	-2.63093e-07
-0.69427	-1.0882e-06	-0.69427	-8.07181e-07	-0.69427	-2.56593e-07
-0.69183	-1.08087e-06	-0.69183	-8.04343e-07	-0.69183	-2.53419e-07
-0.68939	-1.07233e-06	-0.68939	-8.0178e-07	-0.68939	-2.48414e-07
-0.68695	-1.06531e-06	-0.68695	-7.98087e-07	-0.68695	-2.44447e-07
-0.68451	-1.05829e-06	-0.68451	-7.97294e-07	-0.68451	-2.39381e-07
-0.68207	-1.05158e-06	-0.68207	-7.93204e-07	-0.68207	-2.37398e-07
-0.67963	-1.04578e-06	-0.67963	-7.90976e-07	-0.67963	-2.33369e-07
-0.67719	-1.03876e-06	-0.67719	-7.8646e-07	-0.67719	-2.29371e-07
-0.67474	-1.03174e-06	-0.67474	-7.83896e-07	-0.67474	-2.26411e-07
-0.6723	-1.0235e-06	-0.6723	-7.81882e-07	-0.6723	-2.23787e-07
-0.66986	-1.01709e-06	-0.66986	-7.78983e-07	-0.66986	-2.20216e-07
-0.66742	-1.01068e-06	-0.66742	-7.76053e-07	-0.66742	-2.17622e-07
-0.66498	-1.00488e-06	-0.66498	-7.72605e-07	-0.66498	-2.14937e-07
-0.66254	-9.96339e-07	-0.66254	-7.69706e-07	-0.66254	-2.11549e-07
-0.6601	-9.91456e-07	-0.6601	-7.66593e-07	-0.6601	-2.08314e-07
-0.65765	-9.84437e-07	-0.65765	-7.63572e-07	-0.65765	-2.0395e-07
-0.65521	-9.77723e-07	-0.65521	-7.6052e-07	-0.65521	-2.03004e-07
-0.65277	-9.70094e-07	-0.65277	-7.57224e-07	-0.65277	-1.98793e-07
-0.65033	-9.63685e-07	-0.65033	-7.53714e-07	-0.65033	-1.95741e-07
-0.64789	-9.55446e-07	-0.64789	-7.49167e-07	-0.64789	-1.91469e-07
-0.64545	-9.49342e-07	-0.64545	-7.47489e-07	-0.64545	-1.89882e-07
-0.64301	-9.42323e-07	-0.64301	-7.43583e-07	-0.64301	-1.86921e-07
-0.64056	-9.37745e-07	-0.64056	-7.40836e-07	-0.64056	-1.85518e-07
-0.63812	-9.30421e-07	-0.63812	-7.36747e-07	-0.63812	-1.81672e-07
-0.63568	-9.23097e-07	-0.63568	-7.33756e-07	-0.63568	-1.78865e-07
-0.63324	-9.15468e-07	-0.63324	-7.30582e-07	-0.63324	-1.75935e-07
-0.6308	-9.09364e-07	-0.6308	-7.28141e-07	-0.6308	-1.75905e-07
-0.62836	-9.02345e-07	-0.62836	-7.24387e-07	-0.62836	-1.71571e-07
-0.62592	-8.95631e-07	-0.62592	-7.20786e-07	-0.62592	-1.69526e-07
-0.62347	-8.89223e-07	-0.62347	-7.17246e-07	-0.62347	-1.67421e-07
-0.62103	-8.81898e-07	-0.62103	-7.13584e-07	-0.62103	-1.65162e-07
-0.61859	-8.761e-07	-0.61859	-7.11936e-07	-0.61859	-1.60982e-07
-0.61615	-8.68471e-07	-0.61615	-7.08304e-07	-0.61615	-1.58784e-07
-0.61371	-8.61146e-07	-0.61371	-7.04703e-07	-0.61371	-1.56373e-07
-0.61127	-8.55958e-07	-0.61127	-7.01285e-07	-0.61127	-1.55092e-07
-0.60883	-8.48329e-07	-0.60883	-6.99088e-07	-0.60883	-1.52315e-07
-0.60638	-8.4192e-07	-0.60638	-6.95579e-07	-0.60638	-1.49751e-07
-0.60394	-8.33986e-07	-0.60394	-6.92069e-07	-0.60394	-1.46943e-07
-0.6015	-8.27882e-07	-0.6015	-6.89628e-07	-0.6015	-1.44899e-07
-0.59906	-8.21168e-07	-0.59906	-6.85599e-07	-0.59906	-1.44594e-07
-0.59662	-8.14454e-07	-0.59662	-6.82334e-07	-0.59662	-1.40809e-07
-0.59418	-8.08351e-07	-0.59418	-6.78519e-07	-0.59418	-1.38856e-07
-0.59174	-8.00111e-07	-0.59174	-6.75925e-07	-0.59174	-1.37605e-07
-0.58929	-7.94313e-07	-0.58929	-6.73606e-07	-0.58929	-1.35682e-07
-0.58685	-7.88209e-07	-0.58685	-6.69394e-07	-0.58685	-1.3318e-07
-0.58441	-7.83327e-07	-0.58441	-6.69028e-07	-0.58441	-1.31044e-07
-0.58197	-7.76918e-07	-0.58197	-6.64634e-07	-0.58197	-1.29518e-07
-0.57953	-7.69899e-07	-0.57953	-6.603e-07	-0.57953	-1.27687e-07
-0.57709	-7.63795e-07	-0.57709	-6.56943e-07	-0.57709	-1.25856e-07
-0.57465	-7.56471e-07	-0.57465	-6.54685e-07	-0.57465	-1.25368e-07
-0.5722	-7.50368e-07	-0.5722	-6.51359e-07	-0.5722	-1.23048e-07
-0.56976	-7.44569e-07	-0.56976	-6.48337e-07	-0.56976	-1.19569e-07
-0.56732	-7.3816e-07	-0.56732	-6.45286e-07	-0.56732	-1.1902e-07
-0.56488	-7.30836e-07	-0.56488	-6.41501e-07	-0.56488	-1.16823e-07
-0.56244	-7.25343e-07	-0.56244	-6.39396e-07	-0.56244	-1.14534e-07
-0.56	-7.20155e-07	-0.56	-6.37412e-07	-0.56	-1.14961e-07
-0.55756	-7.13136e-07	-0.55756	-6.33658e-07	-0.55756	-1.11299e-07
-0.55511	-7.06422e-07	-0.55511	-6.31308e-07	-0.55511	-1.10139e-07
-0.55267	-6.99098e-07	-0.55267	-6.29752e-07	-0.55267	-1.09053e-07
-0.55023	-6.92079e-07	-0.55023	-6.26639e-07	-0.55023	-1.06935e-07
-0.54779	-6.86281e-07	-0.54779	-6.24106e-07	-0.54779	-1.06386e-07
-0.54535	-6.80787e-07	-0.54535	-6.21024e-07	-0.54535	-1.02995e-07
-0.54291	-6.73463e-07	-0.54291	-6.17087e-07	-0.54291	-1.01207e-07
-0.54047	-6.66444e-07	-0.54047	-6.14921e-07	-0.54047	-1.0038e-07
-0.53802	-6.5973e-07	-0.53802	-6.12937e-07	-0.53802	-9.67726e-08
-0.53558	-6.52101e-07	-0.53558	-6.0958e-07	-0.53558	-9.63758e-08
-0.53314	-6.48134e-07	-0.53314	-6.072e-07	-0.53314	-9.48499e-08
-0.5307	-6.39894e-07	-0.5307	-6.05216e-07	-0.5307	-9.29884e-08
-0.52826	-6.3379e-07	-0.52826	-6.0189e-07	-0.52826	-9.09742e-08
-0.52582	-6.27077e-07	-0.52582	-5.99662e-07	-0.52582	-8.85175e-08
-0.52338	-6.21889e-07	-0.52338	-5.97617e-07	-0.52338	-8.76783e-08
-0.52094	-6.14564e-07	-0.52094	-5.93802e-07	-0.52094	-8.65797e-08
-0.51849	-6.0785e-07	-0.51849	-5.9069e-07	-0.51849	-8.32838e-08
-0.51605	-6.01747e-07	-0.51605	-5.90415e-07	-0.51605	-8.29176e-08
-0.51361	-5.95643e-07	-0.51361	-5.86295e-07	-0.51361	-8.14832e-08
-0.51117	-5.88624e-07	-0.51117	-5.85288e-07	-0.51117	-7.96522e-08
-0.50873	-5.82521e-07	-0.50873	-5.82969e-07	-0.50873	-7.74854e-08
-0.50629	-5.74281e-07	-0.50629	-5.80771e-07	-0.50629	-7.49525e-08
-0.50385	-5.68391e-07	-0.50385	-5.79001e-07	-0.50385	-7.35792e-08
-0.5014	-5.60701e-07	-0.5014	-5.76011e-07	-0.5014	-7.1504e-08
-0.49896	-5.54292e-07	-0.49896	-5.73142e-07	-0.49896	-6.91847e-08
-0.49652	-5.48066e-07	-0.49652	-5.71067e-07	-0.49652	-6.73231e-08
-0.49408	-5.41871e-07	-0.49408	-5.69327e-07	-0.49408	-6.68348e-08
-0.49164	-5.34578e-07	-0.49164	-5.6829e-07	-0.49164	-6.31727e-08
-0.4892	-5.29878e-07	-0.4892	-5.65268e-07	-0.4892	-6.29286e-08
-0.48676	-5.21943e-07	-0.48676	-5.63559e-07	-0.48676	-5.99684e-08
-0.48431	-5.14863e-07	-0.48431	-5.60416e-07	-0.48431	-5.98768e-08
-0.48187	-5.08424e-07	-0.48187	-5.59256e-07	-0.48187	-5.70997e-08
-0.47943	-5.00306e-07	-0.47943	-5.54831e-07	-0.47943	-5.63673e-08
-0.47699	-4.95241e-07	-0.47699	-5.52756e-07	-0.47699	-5.46583e-08
-0.47455	-4.87977e-07	-0.47455	-5.49735e-07	-0.47455	-5.28578e-08
-0.47211	-4.81386e-07	-0.47211	-5.47477e-07	-0.47211	-5.00196e-08
-0.46967	-4.74946e-07	-0.46967	-5.44089e-07	-0.46967	-4.96839e-08
-0.46722	-4.68507e-07	-0.46722	-5.41343e-07	-0.46722	-4.66627e-08
-0.46478	-4.63014e-07	-0.46478	-5.39298e-07	-0.46478	-4.52589e-08
-0.46234	-4.56148e-07	-0.46234	-5.3649e-07	-0.46234	-4.40382e-08
-0.4599	-4.49067e-07	-0.4599	-5.33256e-07	-0.4599	-4.26649e-08
-0.45746	-4.4333e-07	-0.45746	-5.30997e-07	-0.45746	-3.98268e-08
-0.45502	-4.37349e-07	-0.45502	-5.28037e-07	-0.45502	-3.8606e-08
-0.45258	-4.30452e-07	-0.45258	-5.26023e-07	-0.45258	-3.65309e-08
-0.45013	-4.23158e-07	-0.45013	-5.21598e-07	-0.45013	-3.57679e-08
-0.44769	-4.16322e-07	-0.44769	-5.20133e-07	-0.44769	-3.33265e-08
-0.44525	-4.09761e-07	-0.44525	-5.17386e-07	-0.44525	-3.25636e-08
-0.44281	-4.03352e-07	-0.44281	-5.14274e-07	-0.44281	-2.98475e-08
-0.44037	-3.97737e-07	-0.44037	-5.12107e-07	-0.44037	-2.92066e-08
-0.43793	-3.91603e-07	-0.43793	-5.08994e-07	-0.43793	-2.68263e-08
-0.43549	-3.86323e-07	-0.43549	-5.06705e-07	-0.43549	-2.54835e-08
-0.43304	-3.78053e-07	-0.43304	-5.04508e-07	-0.43304	-2.3683e-08
-0.4306	-3.72529e-07	-0.4306	-5.00998e-07	-0.4306	-2.36524e-08
-0.42816	-3.65388e-07	-0.42816	-4.98252e-07	-0.42816	-2.07533e-08
-0.42572	-3.59865e-07	-0.42572	-4.94346e-07	-0.42572	-1.87391e-08
-0.42328	-3.54402e-07	-0.42328	-4.93247e-07	-0.42328	-1.78541e-08
-0.42084	-3.4839e-07	-0.42084	-4.90317e-07	-0.42084	-1.61756e-08
-0.4184	-3.41585e-07	-0.4184	-4.89249e-07	-0.4184	-1.35206e-08
-0.41595	-3.36366e-07	-0.41595	-4.86136e-07	-0.41595	-1.32459e-08
-0.41351	-3.28523e-07	-0.41351	-4.82474e-07	-0.41351	-1.11402e-08
-0.41107	-3.2361e-07	-0.41107	-4.79575e-07	-0.41107	-9.21762e-09
-0.40863	-3.18788e-07	-0.40863	-4.77012e-07	-0.40863	-8.11899e-09
-0.40619	-3.1244e-07	-0.40619	-4.75089e-07	-0.40619	-5.79965e-09
-0.40375	-3.06978e-07	-0.40375	-4.71915e-07	-0.40375	-6.16586e-09
-0.40131	-3.0182e-07	-0.40131	-4.68711e-07	-0.40131	-3.93808e-09
-0.39886	-2.94496e-07	-0.39886	-4.66849e-07	-0.39886	-2.65634e-09
-0.39642	-2.89064e-07	-0.39642	-4.63035e-07	-0.39642	-6.42181e-10
-0.39398	-2.81892e-07	-0.39398	-4.61356e-07	-0.39398	1.00577e-09
-0.39154	-2.76796e-07	-0.39154	-4.58426e-07	-0.39154	3.56925e-09
-0.3891	-2.72066e-07	-0.3891	-4.5629e-07	-0.3891	4.14908e-09
-0.38666	-2.67e-07	-0.38666	-4.53544e-07	-0.38666	5.43082e-09
-0.38422	-2.59889e-07	-0.38422	-4.50614e-07	-0.38422	7.78067e-09
-0.38177	-2.5525e-07	-0.38177	-4.50309e-07	-0.38177	9.52017e-09
-0.37933	-2.49696e-07	-0.37933	-4.46586e-07	-0.37933	1.11681e-08
-0.37689	-2.45942e-07	-0.37689	-4.43168e-07	-0.37689	1.18395e-08
-0.37445	-2.39808e-07	-0.37445	-4.42588e-07	-0.37445	1.40063e-08
-0.37201	-2.35566e-07	-0.37201	-4.39506e-07	-0.37201	1.40063e-08
-0.36957	-2.28792e-07	-0.36957	-4.37827e-07	-0.36957	1.62951e-08
-0.36713	-2.24031e-07	-0.36713	-4.35355e-07	-0.36713	1.80651e-08
-0.36469	-2.20216e-07	-0.36469	-4.33494e-07	-0.36469	1.91332e-08
-0.36224	-2.13563e-07	-0.36224	-4.31662e-07	-0.36224	2.16357e-08
-0.3598	-2.08406e-07	-0.3598	-4.30716e-07	-0.3598	2.30395e-08
-0.35736	-2.03554e-07	-0.35736	-4.26963e-07	-0.35736	2.46874e-08
-0.35492	-1.9922e-07	-0.35492	-4.25406e-07	-0.35492	2.54198e-08
-0.35248	-1.95558e-07	-0.35248	-4.23545e-07	-0.35248	2.55114e-08
-0.35004	-1.89851e-07	-0.35004	-4.22934e-07	-0.35004	2.76171e-08
-0.3476	-1.85701e-07	-0.3476	-4.19913e-07	-0.3476	2.9967e-08
-0.34515	-1.80726e-07	-0.34515	-4.18113e-07	-0.34515	3.12182e-08
-0.34271	-1.77125e-07	-0.34271	-4.1619e-07	-0.34271	3.39037e-08
-0.34027	-1.71815e-07	-0.34027	-4.12986e-07	-0.34027	3.38122e-08
-0.33783	-1.69099e-07	-0.33783	-4.10514e-07	-0.33783	3.5338e-08
-0.33539	-1.63942e-07	-0.33539	-4.08927e-07	-0.33539	3.68029e-08
-0.33295	-1.60737e-07	-0.33295	-4.08927e-07	-0.33295	3.8817e-08
-0.33051	-1.54725e-07	-0.33051	-4.05417e-07	-0.33051	3.95495e-08
-0.32806	-1.52345e-07	-0.32806	-4.04227e-07	-0.32806	4.17773e-08
-0.32562	-1.48073e-07	-0.32562	-4.01816e-07	-0.32562	4.26623e-08
-0.32318	-1.43953e-07	-0.32318	-3.9965e-07	-0.32318	4.43102e-08
-0.32074	-1.40962e-07	-0.32074	-3.96659e-07	-0.32074	4.58666e-08
-0.3183	-1.34431e-07	-0.3183	-3.94065e-07	-0.3183	4.54394e-08
-0.31586	-1.30861e-07	-0.31586	-3.91318e-07	-0.31586	4.96508e-08
-0.31342	-1.28084e-07	-0.31342	-3.90818e-07	-0.31342	4.91015e-08
-0.31097	-1.24544e-07	-0.31097	-3.88205e-07	-0.31097	4.98644e-08
-0.30853	-1.214e-07	-0.30853	-3.84937e-07	-0.30853	5.12987e-08
-0.30609	-1.18013e-07	-0.30609	-3.83262e-07	-0.30609	5.35876e-08
-0.30365	-1.14686e-07	-0.30365	-3.81547e-07	-0.30365	5.49608e-08
-0.30121	-1.10292e-07	-0.30121	-3.79172e-07	-0.30121	5.63036e-08
-0.29877	-1.08278e-07	-0.29877	-3.77341e-07	-0.29877	5.85009e-08
-0.29633	-1.04097e-07	-0.29633	-3.75449e-07	-0.29633	5.89892e-08
-0.29388	-1.01014e-07	-0.29388	-3.73444e-07	-0.29388	6.09728e-08
-0.29144	-9.67176e-08	-0.29144	-3.70865e-07	-0.29144	6.24682e-08
-0.289	-9.46363e-08	-0.289	-3.68625e-07	-0.289	6.2224e-08
-0.28656	-9.16151e-08	-0.28656	-3.65601e-07	-0.28656	6.53673e-08
-0.28412	-8.84718e-08	-0.28412	-3.63883e-07	-0.28412	6.5581e-08
-0.28168	-8.52064e-08	-0.28168	-3.60892e-07	-0.28168	6.65575e-08
-0.27924	-8.29481e-08	-0.27924	-3.58939e-07	-0.27924	6.86022e-08
-0.27679	-7.96217e-08	-0.27679	-3.55857e-07	-0.27679	6.97619e-08
-0.27435	-7.73634e-08	-0.27435	-3.5488e-07	-0.27435	7.17455e-08
-0.27191	-7.55323e-08	-0.27191	-3.50882e-07	-0.27191	7.30578e-08
-0.26947	-7.26026e-08	-0.26947	-3.5012e-07	-0.26947	7.46752e-08
-0.26703	-7.04054e-08	-0.26703	-3.47526e-07	-0.26703	7.55297e-08
-0.26459	-6.61024e-08	-0.26459	-3.43863e-07	-0.26459	7.72082e-08
-0.26215	-6.36915e-08	-0.26215	-3.41514e-07	-0.26215	7.81237e-08
-0.2597	-6.14942e-08	-0.2597	-3.40232e-07	-0.2597	8.06261e-08
-0.25726	-5.87476e-08	-0.25726	-3.37455e-07	-0.25726	8.19689e-08
-0.25482	-5.73133e-08	-0.25482	-3.36051e-07	-0.25482	8.30675e-08
-0.25238	-5.39869e-08	-0.25238	-3.31748e-07	-0.25238	8.32812e-08
-0.24994	-5.16371e-08	-0.24994	-3.29673e-07	-0.24994	8.45629e-08
-0.2475	-5.00807e-08	-0.2475	-3.26621e-07	-0.2475	8.52953e-08
-0.24506	-4.85243e-08	-0.24506	-3.25126e-07	-0.24506	8.70348e-08
-0.24261	-4.49842e-08	-0.24261	-3.24241e-07	-0.24261	8.98119e-08
-0.24017	-4.28175e-08	-0.24017	-3.21158e-07	-0.24017	9.15819e-08
-0.23773	-4.11085e-08	-0.23773	-3.16855e-07	-0.23773	9.28332e-08
-0.23529	-3.90028e-08	-0.23529	-3.14628e-07	-0.23529	9.32299e-08
-0.23285	-3.68055e-08	-0.23285	-3.12583e-07	-0.23285	9.45727e-08
-0.23041	-3.46082e-08	-0.23041	-3.09562e-07	-0.23041	9.43896e-08
-0.22797	-3.33265e-08	-0.22797	-3.08036e-07	-0.22797	9.73498e-08
-0.22552	-3.2411e-08	-0.22552	-3.05808e-07	-0.22552	9.99438e-08
-0.22308	-2.93897e-08	-0.22308	-3.03367e-07	-0.22308	1.00096e-07
-0.22064	-2.89015e-08	-0.22064	-2.99735e-07	-0.22064	1.01042e-07
-0.2182	-2.75892e-08	-0.2182	-2.98392e-07	-0.2182	1.01897e-07
-0.21576	-2.36524e-08	-0.21576	-2.97477e-07	-0.21576	1.05132e-07
-0.21332	-2.27369e-08	-0.21332	-2.94455e-07	-0.21332	1.06688e-07
-0.21088	-2.16993e-08	-0.21088	-2.93082e-07	-0.21088	1.07604e-07
-0.20844	-1.95936e-08	-0.20844	-2.89145e-07	-0.20844	1.08275e-07
-0.20599	-1.73353e-08	-0.20599	-2.87742e-07	-0.20599	1.09618e-07
-0.20355	-1.54127e-08	-0.20355	-2.84354e-07	-0.20355	1.109e-07
-0.20111	-1.31849e-08	-0.20111	-2.81547e-07	-0.20111	1.12303e-07
-0.19867	-1.2544e-08	-0.19867	-2.79899e-07	-0.19867	1.12395e-07
-0.19623	-1.04078e-08	-0.19623	-2.78037e-07	-0.19623	1.14684e-07
-0.19379	-9.24814e-09	-0.19379	-2.75077e-07	-0.19379	1.15264e-07
-0.19135	-7.9664e-09	-0.19135	-2.74009e-07	-0.19135	1.17858e-07
-0.1889	-7.66122e-09	-0.1889	-2.70865e-07	-0.1889	1.18804e-07
-0.18646	-5.76913e-09	-0.18646	-2.68851e-07	-0.18646	1.192e-07
-0.18402	-3.51083e-09	-0.18402	-2.64731e-07	-0.18402	1.20574e-07
-0.18158	-3.26669e-09	-0.18158	-2.63236e-07	-0.18158	1.21855e-07
-0.17914	-6.72698e-10	-0.17914	-2.61283e-07	-0.17914	1.24175e-07
-0.1767	1.12784e-09	-0.1767	-2.58109e-07	-0.1767	1.24419e-07
-0.17426	2.95889e-09	-0.17426	-2.56095e-07	-0.17426	1.25548e-07
-0.17181	4.11856e-09	-0.17181	-2.52189e-07	-0.17181	1.26982e-07
-0.16937	4.51529e-09	-0.16937	-2.51059e-07	-0.16937	1.28661e-07
-0.16693	6.80411e-09	-0.16693	-2.49595e-07	-0.16693	1.2979e-07
-0.16449	8.1774e-09	-0.16449	-2.45322e-07	-0.16449	1.31224e-07
-0.16205	1.0161e-08	-0.16205	-2.43583e-07	-0.16205	1.32598e-07
-0.15961	1.02831e-08	-0.15961	-2.39036e-07	-0.15961	1.34062e-07
-0.15717	9.76431e-09	-0.15717	-2.38578e-07	-0.15717	1.35069e-07
-0.15472	1.20836e-08	-0.15472	-2.36686e-07	-0.15472	1.35619e-07
-0.15228	1.40368e-08	-0.15228	-2.34855e-07	-0.15228	1.38274e-07
-0.14984	1.56542e-08	-0.14984	-2.31559e-07	-0.14984	1.39311e-07
-0.1474	1.76378e-08	-0.1474	-2.27897e-07	-0.1474	1.4038e-07
-0.14496	1.94384e-08	-0.14496	-2.26462e-07	-0.14496	1.41783e-07
-0.14252	2.11474e-08	-0.14252	-2.22556e-07	-0.14252	1.41814e-07
-0.14008	2.19103e-08	-0.14008	-2.21366e-07	-0.14008	1.44774e-07
-0.13763	2.27648e-08	-0.13763	-2.19626e-07	-0.13763	1.45598e-07
-0.13519	2.31615e-08	-0.13519	-2.16483e-07	-0.13519	1.46392e-07
-0.13275	2.52367e-08	-0.13275	-2.14103e-07	-0.13275	1.47978e-07
-0.13031	2.68236e-08	-0.13031	-2.11753e-07	-0.13031	1.48924e-07
-0.12787	2.78307e-08	-0.12787	-2.09433e-07	-0.12787	1.51183e-07
-0.12543	2.91125e-08	-0.12543	-2.06229e-07	-0.12543	1.52037e-07
-0.12299	2.96618e-08	-0.12299	-2.04398e-07	-0.12299	1.53014e-07
-0.12054	3.14623e-08	-0.12054	-2.02933e-07	-0.12054	1.55272e-07
-0.1181	3.22558e-08	-0.1181	-1.99332e-07	-0.1181	1.54967e-07
-0.11566	3.46972e-08	-0.11566	-1.9741e-07	-0.11566	1.56218e-07
-0.11322	3.68334e-08	-0.11322	-1.95243e-07	-0.11322	1.58568e-07
-0.11078	3.75353e-08	-0.11078	-1.93595e-07	-0.11078	1.58293e-07
-0.10834	3.80846e-08	-0.10834	-1.89353e-07	-0.10834	1.61254e-07
-0.1059	3.83288e-08	-0.1059	-1.87156e-07	-0.1059	1.60552e-07
-0.10345	3.86034e-08	-0.10345	-1.84195e-07	-0.10345	1.63085e-07
-0.10101	3.96105e-08	-0.10101	-1.81876e-07	-0.10101	1.63359e-07
-0.09857	4.01293e-08	-0.09857	-1.7858e-07	-0.09857	1.66106e-07
-0.09613	4.18383e-08	-0.09613	-1.76413e-07	-0.09613	1.67632e-07
-0.09369	4.16857e-08	-0.09369	-1.73148e-07	-0.09369	1.68028e-07
-0.09125	4.19909e-08	-0.09125	-1.71714e-07	-0.09125	1.70195e-07
-0.08881	4.34557e-08	-0.08881	-1.70035e-07	-0.08881	1.70836e-07
-0.08636	4.55614e-08	-0.08636	-1.64725e-07	-0.08636	1.73125e-07
-0.08392	4.51342e-08	-0.08392	-1.62558e-07	-0.08392	1.71752e-07
-0.08148	4.68737e-08	-0.08148	-1.60178e-07	-0.08148	1.74193e-07
-0.07904	4.75146e-08	-0.07904	-1.59507e-07	-0.07904	1.75505e-07
-0.0766	4.93456e-08	-0.0766	-1.56363e-07	-0.0766	1.77428e-07
-0.07416	4.99865e-08	-0.07416	-1.54319e-07	-0.07416	1.7758e-07
-0.07172	5.14818e-08	-0.07172	-1.50351e-07	-0.07172	1.79106e-07
-0.06927	5.23363e-08	-0.06927	-1.47666e-07	-0.06927	1.80297e-07
-0.06683	5.37401e-08	-0.06683	-1.45011e-07	-0.06683	1.82372e-07
-0.06439	5.58459e-08	-0.06439	-1.43851e-07	-0.06439	1.84111e-07
-0.06195	5.75854e-08	-0.06195	-1.40525e-07	-0.06195	1.85454e-07
-0.05951	5.90807e-08	-0.05951	-1.38053e-07	-0.05951	1.85698e-07
-0.05707	5.89892e-08	-0.05707	-1.36039e-07	-0.05707	1.87163e-07
-0.05463	6.09118e-08	-0.05463	-1.32407e-07	-0.05463	1.88292e-07
-0.05219	6.19189e-08	-0.05219	-1.3021e-07	-0.05219	1.89299e-07
-0.04974	6.33532e-08	-0.04974	-1.2786e-07	-0.04974	1.90642e-07
-0.0473	6.49096e-08	-0.0473	-1.24625e-07	-0.0473	1.93267e-07
-0.04486	6.44518e-08	-0.04486	-1.22062e-07	-0.04486	1.92656e-07
-0.04242	6.67711e-08	-0.04242	-1.19162e-07	-0.04242	1.94762e-07
-0.03998	6.7412e-08	-0.03998	-1.16874e-07	-0.03998	1.95464e-07
-0.03754	6.77782e-08	-0.03754	-1.12937e-07	-0.03754	1.97081e-07
-0.0351	6.97619e-08	-0.0351	-1.11258e-07	-0.0351	1.98149e-07
-0.03265	7.09215e-08	-0.03265	-1.10587e-07	-0.03265	1.99309e-07
-0.03021	7.15929e-08	-0.03021	-1.05796e-07	-0.03021	2.01293e-07
-0.02777	7.28441e-08	-0.02777	-1.0485e-07	-0.02777	2.0175e-07
-0.02533	7.49193e-08	-0.02533	-1.02652e-07	-0.02533	2.02422e-07
-0.02289	7.66588e-08	-0.02289	-9.74645e-08	-0.02289	2.03704e-07
-0.02045	7.67199e-08	-0.02045	-9.53283e-08	-0.02045	2.05229e-07
-0.01801	7.65368e-08	-0.01801	-9.4016e-08	-0.01801	2.07488e-07
-0.01556	7.79711e-08	-0.01556	-9.04455e-08	-0.01556	2.08556e-07
-0.01312	7.83983e-08	-0.01312	-8.86144e-08	-0.01312	2.07732e-07
-0.01068	8.09313e-08	-0.01068	-8.66002e-08	-0.01068	2.12248e-07
-0.00824	8.19994e-08	-0.00824	-8.187e-08	-0.00824	2.12096e-07
-0.0058	8.28234e-08	-0.0058	-8.12597e-08	-0.0058	2.12462e-07
-0.00336	8.38915e-08	-0.00336	-7.93371e-08	-0.00336	2.1472e-07
-0.000915527	8.23046e-08	-0.000915527	-7.60412e-08	-0.000915527	2.15087e-07
0.00153	8.45934e-08	0.00153	-7.27758e-08	0.00153	2.17559e-07
0.00397	8.45934e-08	0.00397	-7.03344e-08	0.00397	2.1765e-07
0.00641	8.38e-08	0.00641	-6.85338e-08	0.00641	2.18535e-07
0.00885	8.60583e-08	0.00885	-6.62755e-08	0.00885	2.20702e-07
0.01129	8.61193e-08	0.01129	-6.2827e-08	0.01129	2.2238e-07
0.01373	8.79503e-08	0.01373	-5.91039e-08	0.01373	2.22014e-07
0.01617	9.03612e-08	0.01617	-5.88598e-08	0.01617	2.25249e-07
0.01862	9.19176e-08	0.01862	-5.44957e-08	0.01862	2.25585e-07
0.02106	9.50304e-08	0.02106	-5.34581e-08	0.02106	2.26866e-07
0.0235	9.80211e-08	0.0235	-5.10778e-08	0.0235	2.27812e-07
0.02594	9.93944e-08	0.02594	-4.68664e-08	0.02594	2.29003e-07
0.02838	1.00402e-07	0.02838	-4.43944e-08	0.02838	2.29399e-07
0.03082	1.02172e-07	0.03082	-4.21666e-08	0.03082	2.31505e-07
0.03326	1.05071e-07	0.03326	-4.06408e-08	0.03326	2.32848e-07
0.03571	1.06139e-07	0.03571	-3.59105e-08	0.03571	2.3474e-07
0.03815	1.06444e-07	0.03815	-3.42321e-08	0.03815	2.35442e-07
0.04059	1.08977e-07	0.04059	-3.27672e-08	0.04059	2.35839e-07
0.04303	1.08794e-07	0.04303	-2.96544e-08	0.04303	2.38036e-07
0.04547	1.09984e-07	0.04547	-2.7152e-08	0.04547	2.39012e-07
0.04791	1.11815e-07	0.04791	-2.47106e-08	0.04791	2.39836e-07
0.05035	1.1444e-07	0.05035	-2.22692e-08	0.05035	2.41973e-07
0.0528	1.15233e-07	0.0528	-2.02245e-08	0.0528	2.43193e-07
0.05524	1.17003e-07	0.05524	-1.63793e-08	0.05524	2.42949e-07
0.05768	1.1798e-07	0.05768	-1.47619e-08	0.05768	2.4475e-07
0.06012	1.18956e-07	0.06012	-1.20458e-08	0.06012	2.46001e-07
0.06256	1.20604e-07	0.06256	-8.68886e-09	0.06256	2.47466e-07
0.065	1.22618e-07	0.065	-6.18642e-09	0.065	2.4887e-07
0.06744	1.24358e-07	0.06744	-1.6393e-09	0.06744	2.49968e-07
0.06989	1.26525e-07	0.06989	-6.01703e-10	0.06989	2.51921e-07
0.07233	1.27349e-07	0.07233	1.59556e-09	0.07233	2.52135e-07
0.07477	1.30522e-07	0.07477	4.67784e-09	0.07477	2.53661e-07
0.07721	1.31713e-07	0.07721	6.63096e-09	0.07721	2.55492e-07
0.07965	1.32659e-07	0.07965	9.92686e-09	0.07965	2.56743e-07
0.08209	1.34612e-07	0.08209	1.21546e-08	0.08209	2.57811e-07
0.08453	1.36809e-07	0.08453	1.41383e-08	0.08453	2.59123e-07
0.08698	1.37175e-07	0.08698	1.7129e-08	0.08698	2.61199e-07
0.08942	1.39891e-07	0.08942	2.06996e-08	0.08942	2.61168e-07
0.09186	1.41753e-07	0.09186	2.46669e-08	0.09186	2.61962e-07
0.0943	1.4276e-07	0.0943	2.65284e-08	0.0943	2.6422e-07
0.09674	1.42638e-07	0.09674	2.91224e-08	0.09674	2.66997e-07
0.09918	1.43706e-07	0.09918	3.17774e-08	0.09918	2.65776e-07
0.10162	1.44774e-07	0.10162	3.48292e-08	0.10162	2.67729e-07
0.10406	1.463e-07	0.10406	3.71791e-08	0.10406	2.70201e-07
0.10651	1.48467e-07	0.10651	4.08107e-08	0.10651	2.7133e-07
0.10895	1.49169e-07	0.10895	4.32826e-08	0.10895	2.72917e-07
0.11139	1.51152e-07	0.11139	4.58766e-08	0.11139	2.74382e-07
0.11383	1.53746e-07	0.11383	4.96607e-08	0.11383	2.75756e-07
0.11627	1.56279e-07	0.11627	5.16444e-08	0.11627	2.7542e-07
0.11871	1.58049e-07	0.11871	5.50013e-08	0.11871	2.78075e-07
0.12115	1.60796e-07	0.12115	5.78089e-08	0.12115	2.78685e-07
0.1236	1.62047e-07	0.1236	6.09523e-08	0.1236	2.79814e-07
0.12604	1.64427e-07	0.12604	6.36073e-08	0.12604	2.81188e-07
0.12848	1.66838e-07	0.12848	6.81544e-08	0.12848	2.83385e-07
0.13092	1.69615e-07	0.13092	6.96498e-08	0.13092	2.85124e-07
0.13336	1.71477e-07	0.13336	7.36476e-08	0.13336	2.86223e-07
0.1358	1.75261e-07	0.1358	7.52955e-08	0.1358	2.86864e-07
0.13824	1.7813e-07	0.13824	7.95985e-08	0.13824	2.87779e-07
0.14069	1.79839e-07	0.14069	8.23756e-08	0.14069	2.88664e-07
0.14313	1.82799e-07	0.14313	8.51527e-08	0.14313	2.90892e-07
0.14557	1.84661e-07	0.14557	8.84181e-08	0.14557	2.92296e-07
0.14801	1.86553e-07	0.14801	9.32093e-08	0.14801	2.93975e-07
0.15045	1.88902e-07	0.15045	9.45521e-08	0.15045	2.955e-07
0.15289	1.91405e-07	0.15289	9.94044e-08	0.15289	2.96599e-07
0.15533	1.9348e-07	0.15533	1.01602e-07	0.15533	2.97331e-07
0.15778	1.97508e-07	0.15778	1.04898e-07	0.15778	2.98918e-07
0.16022	1.99858e-07	0.16022	1.08407e-07	0.16022	3.01695e-07
0.16266	2.02635e-07	0.16266	1.11398e-07	0.16266	3.02184e-07
0.1651	2.05931e-07	0.1651	1.14419e-07	0.1651	3.0374e-07
0.16754	2.09075e-07	0.16754	1.1799e-07	0.16754	3.0432e-07
0.16998	2.10784e-07	0.16998	1.21408e-07	0.16998	3.0609e-07
0.17242	2.14965e-07	0.17242	1.25253e-07	0.17242	3.06975e-07
0.17487	2.18535e-07	0.17487	1.29891e-07	0.17487	3.09447e-07
0.17731	2.21953e-07	0.17731	1.33645e-07	0.17731	3.10668e-07
0.17975	2.24944e-07	0.17975	1.36331e-07	0.17975	3.1201e-07
0.18219	2.28575e-07	0.18219	1.39962e-07	0.18219	3.12987e-07
0.18463	2.30956e-07	0.18463	1.44754e-07	0.18463	3.14391e-07
0.18707	2.34038e-07	0.18707	1.48202e-07	0.18707	3.16283e-07
0.18951	2.35259e-07	0.18951	1.5101e-07	0.18951	3.17107e-07
0.19196	2.40813e-07	0.19196	1.53878e-07	0.19196	3.19975e-07
0.1944	2.42797e-07	0.1944	1.58731e-07	0.1944	3.20403e-07
0.19684	2.46611e-07	0.19684	1.63125e-07	0.19684	3.23027e-07
0.19928	2.49602e-07	0.19928	1.66238e-07	0.19928	3.25133e-07
0.20172	2.54088e-07	0.20172	1.68862e-07	0.20172	3.26201e-07
0.20416	2.5775e-07	0.20416	1.74081e-07	0.20416	3.26811e-07
0.2066	2.62023e-07	0.2066	1.7637e-07	0.2066	3.28795e-07
0.20905	2.64891e-07	0.20905	1.81069e-07	0.20905	3.30535e-07
0.21149	2.68523e-07	0.21149	1.84823e-07	0.21149	3.31664e-07
0.21393	2.70751e-07	0.21393	1.90194e-07	0.21393	3.33678e-07
0.21637	2.75481e-07	0.21637	1.92758e-07	0.21637	3.36089e-07
0.21881	2.78136e-07	0.21881	1.96267e-07	0.21881	3.36394e-07
0.22125	2.82744e-07	0.22125	2.01791e-07	0.22125	3.3853e-07
0.22369	2.86772e-07	0.22369	2.06063e-07	0.22369	3.40453e-07
0.22614	2.91228e-07	0.22614	2.09878e-07	0.22614	3.4265e-07
0.22858	2.95073e-07	0.22858	2.13327e-07	0.22858	3.42742e-07
0.23102	2.99224e-07	0.23102	2.17599e-07	0.23102	3.46038e-07
0.23346	3.04412e-07	0.23346	2.21597e-07	0.23346	3.47777e-07
0.2359	3.08318e-07	0.2359	2.26449e-07	0.2359	3.48632e-07
0.23834	3.13628e-07	0.23834	2.28341e-07	0.23834	3.51927e-07
0.24078	3.17565e-07	0.24078	2.33834e-07	0.24078	3.53758e-07
0.24323	3.21959e-07	0.24323	2.37802e-07	0.24323	3.54155e-07
0.24567	3.27452e-07	0.24567	2.41159e-07	0.24567	3.55498e-07
0.24811	3.32366e-07	0.24811	2.45431e-07	0.24811	3.57787e-07
0.25055	3.38378e-07	0.25055	2.50314e-07	0.25055	3.59801e-07
0.25299	3.42284e-07	0.25299	2.55197e-07	0.25299	3.61266e-07
0.25543	3.4793e-07	0.25543	2.6069e-07	0.25543	3.63249e-07
0.25787	3.53392e-07	0.25787	2.64962e-07	0.25787	3.65569e-07
0.26031	3.5916e-07	0.26031	2.68319e-07	0.26031	3.67827e-07
0.26276	3.65538e-07	0.26276	2.72286e-07	0.26276	3.70268e-07
0.2652	3.70726e-07	0.2652	2.7778e-07	0.2652	3.71642e-07
0.26764	3.75884e-07	0.26764	2.82052e-07	0.26764	3.73351e-07
0.27008	3.81896e-07	0.27008	2.8724e-07	0.27008	3.75243e-07
0.27252	3.85588e-07	0.27252	2.91818e-07	0.27252	3.77745e-07
0.27496	3.92913e-07	0.27496	2.9609e-07	0.27496	3.80309e-07
0.2774	3.97978e-07	0.2774	3.00668e-07	0.2774	3.82048e-07
0.27985	4.02495e-07	0.27985	3.05551e-07	0.27985	3.83849e-07
0.28229	4.07714e-07	0.28229	3.11044e-07	0.28229	3.85985e-07
0.28473	4.1284e-07	0.28473	3.15316e-07	0.28473	3.8864e-07
0.28717	4.17937e-07	0.28717	3.20809e-07	0.28717	3.90227e-07
0.28961	4.23033e-07	0.28961	3.2264e-07	0.28961	3.92394e-07
0.29205	4.29106e-07	0.29205	3.29354e-07	0.29205	3.9337e-07
0.29449	4.36797e-07	0.29449	3.34542e-07	0.29449	3.97124e-07
0.29694	4.42168e-07	0.29694	3.37899e-07	0.29694	3.99413e-07
0.29938	4.47997e-07	0.29938	3.44613e-07	0.29938	4.0042e-07
0.30182	4.54527e-07	0.30182	3.48275e-07	0.30182	4.04296e-07
0.30426	4.61333e-07	0.30426	3.54989e-07	0.30426	4.04997e-07
0.3067	4.68138e-07	0.3067	3.58041e-07	0.3067	4.08782e-07
0.30914	4.73906e-07	0.30914	3.62924e-07	0.30914	4.10826e-07
0.31158	4.8004e-07	0.31158	3.68722e-07	0.31158	4.11681e-07
0.31403	4.88158e-07	0.31403	3.72384e-07	0.31403	4.14397e-07
0.31647	4.95177e-07	0.31647	3.77877e-07	0.31647	4.18242e-07
0.31891	5.02196e-07	0.31891	3.8276e-07	0.31891	4.20104e-07
0.32135	5.09398e-07	0.32135	3.86422e-07	0.32135	4.21721e-07
0.32379	5.15807e-07	0.32379	3.92526e-07	0.32379	4.24773e-07
0.32623	5.22826e-07	0.32623	3.95883e-07	0.32623	4.26268e-07
0.32867	5.29235e-07	0.32867	4.01986e-07	0.32867	4.2932e-07
0.33112	5.35948e-07	0.33112	4.06869e-07	0.33112	4.31883e-07
0.33356	5.41747e-07	0.33356	4.10836e-07	0.33356	4.33653e-07
0.336	5.49376e-07	0.336	4.16024e-07	0.336	4.35423e-07
0.33844	5.57311e-07	0.33844	4.21212e-07	0.33844	4.38689e-07
0.34088	5.65245e-07	0.34088	4.2579e-07	0.34088	4.41222e-07
0.34332	5.74095e-07	0.34332	4.30368e-07	0.34332	4.44274e-07
0.34576	5.80504e-07	0.34576	4.34945e-07	0.34576	4.46074e-07
0.34821	5.88744e-07	0.34821	4.39523e-07	0.34821	4.49492e-07
0.35065	5.95763e-07	0.35065	4.42575e-07	0.35065	4.51232e-07
0.35309	6.03392e-07	0.35309	4.47152e-07	0.35309	4.53734e-07
0.35553	6.11632e-07	0.35553	4.5173e-07	0.35553	4.56999e-07
0.35797	6.18651e-07	0.35797	4.56002e-07	0.35797	4.59868e-07
0.36041	6.23839e-07	0.36041	4.62411e-07	0.36041	4.62432e-07
0.36285	6.30248e-07	0.36285	4.66073e-07	0.36285	4.62554e-07
0.3653	6.38182e-07	0.3653	4.69735e-07	0.3653	4.68077e-07
0.36774	6.45812e-07	0.36774	4.75534e-07	0.36774	4.69329e-07
0.37018	6.5161e-07	0.37018	4.7889e-07	0.37018	4.71587e-07
0.37262	6.6107e-07	0.37262	4.82858e-07	0.37262	4.74364e-07
0.37506	6.67479e-07	0.37506	4.86825e-07	0.37506	4.76897e-07
0.3775	6.76634e-07	0.3775	4.91708e-07	0.3775	4.80498e-07
0.37994	6.84874e-07	0.37994	4.96286e-07	0.37994	4.83641e-07
0.38239	6.96166e-07	0.38239	4.99642e-07	0.38239	4.87639e-07
0.38483	7.0288e-07	0.38483	5.0361e-07	0.38483	4.89348e-07
0.38727	7.12645e-07	0.38727	5.08187e-07	0.38727	4.92186e-07
0.38971	7.22411e-07	0.38971	5.12155e-07	0.38971	4.9594e-07
0.39215	7.33092e-07	0.39215	5.15206e-07	0.39215	4.97832e-07
0.39459	7.41027e-07	0.39459	5.19174e-07	0.39459	5.00548e-07
0.39703	7.49877e-07	0.39703	5.24362e-07	0.39703	5.03295e-07
0.39948	7.58422e-07	0.39948	5.28024e-07	0.39948	5.06957e-07
0.40192	7.65746e-07	0.40192	5.32296e-07	0.40192	5.09398e-07
0.40436	7.75206e-07	0.40436	5.35653e-07	0.40436	5.1184e-07
0.4068	7.85887e-07	0.4068	5.3962e-07	0.4068	5.14586e-07
0.40924	7.93212e-07	0.40924	5.42672e-07	0.40924	5.17638e-07
0.41168	8.02977e-07	0.41168	5.4786e-07	0.41168	5.21605e-07
0.41412	8.11827e-07	0.41412	5.49996e-07	0.41412	5.24352e-07
0.41656	8.22203e-07	0.41656	5.55795e-07	0.41656	5.27098e-07
0.41901	8.31969e-07	0.41901	5.5671e-07	0.41901	5.30455e-07
0.42145	8.41429e-07	0.42145	5.61898e-07	0.42145	5.32897e-07
0.42389	8.50279e-07	0.42389	5.66476e-07	0.42389	5.37169e-07
0.42633	8.6035e-07	0.42633	5.69833e-07	0.42633	5.41442e-07
0.42877	8.69506e-07	0.42877	5.72274e-07	0.42877	5.44493e-07
0.43121	8.78661e-07	0.43121	5.77157e-07	0.43121	5.4785e-07
0.43365	8.86901e-07	0.43365	5.79598e-07	0.43365	5.51207e-07
0.4361	8.9453e-07	0.4361	5.82955e-07	0.4361	5.5548e-07
0.43854	9.05211e-07	0.43854	5.88143e-07	0.43854	5.5609e-07
0.44098	9.14366e-07	0.44098	5.9089e-07	0.44098	5.61583e-07
0.44342	9.23522e-07	0.44342	5.94857e-07	0.44342	5.62804e-07
0.44586	9.33898e-07	0.44586	5.97909e-07	0.44586	5.67382e-07
0.4483	9.42748e-07	0.4483	6.01876e-07	0.4483	5.70433e-07
0.45074	9.53734e-07	0.45074	6.04928e-07	0.45074	5.75621e-07
0.45319	9.60753e-07	0.45319	6.07675e-07	0.45319	5.76842e-07
0.45563	9.71434e-07	0.45563	6.12863e-07	0.45563	5.80809e-07
0.45807	9.79674e-07	0.45807	6.15304e-07	0.45807	5.84777e-07
0.46051	9.88524e-07	0.46051	6.19577e-07	0.46051	5.9027e-07
0.46295	9.99205e-07	0.46295	6.22628e-07	0.46295	5.93016e-07
0.46539	1.00989e-06	0.46539	6.25985e-07	0.46539	5.96984e-07
0.46783	1.01996e-06	0.46783	6.29952e-07	0.46783	6.00035e-07
0.47028	1.03247e-06	0.47028	6.33309e-07	0.47028	6.04003e-07
0.47272	1.04224e-06	0.47272	6.36056e-07	0.47272	6.07054e-07
0.47516	1.05322e-06	0.47516	6.37277e-07	0.47516	6.11632e-07
0.4776	1.06146e-06	0.4776	6.42465e-07	0.4776	6.14684e-07
0.48004	1.07245e-06	0.48004	6.46127e-07	0.48004	6.20482e-07
0.48248	1.0813e-06	0.48248	6.47653e-07	0.48248	6.21398e-07
0.48492	1.09045e-06	0.48492	6.53756e-07	0.48492	6.2628e-07
0.48737	1.09839e-06	0.48737	6.57113e-07	0.48737	6.31468e-07
0.48981	1.1112e-06	0.48981	6.58944e-07	0.48981	6.3452e-07
0.49225	1.12036e-06	0.49225	6.63217e-07	0.49225	6.38182e-07
0.49469	1.13287e-06	0.49469	6.65658e-07	0.49469	6.44591e-07
0.49713	1.14294e-06	0.49713	6.69931e-07	0.49713	6.46422e-07
0.49957	1.1521e-06	0.49957	6.73898e-07	0.49957	6.5222e-07
0.50201	1.16217e-06	0.50201	6.76644e-07	0.50201	6.55882e-07
0.50446	1.17499e-06	0.50446	6.80612e-07	0.50446	6.6107e-07
0.5069	1.18597e-06	0.5069	6.83969e-07	0.5069	6.64733e-07
0.50934	1.19635e-06	0.50934	6.88546e-07	0.50934	6.69921e-07
0.51178	1.20795e-06	0.51178	6.90682e-07	0.51178	6.75109e-07
0.51422	1.21832e-06	0.51422	6.93734e-07	0.51422	6.79076e-07
0.51666	1.229e-06	0.51666	6.98617e-07	0.51666	6.84264e-07
0.5191	1.24213e-06	0.5191	7.02584e-07	0.5191	6.87621e-07
0.52155	1.2525e-06	0.52155	7.05331e-07	0.52155	6.93114e-07
0.52399	1.26318e-06	0.52399	7.09909e-07	0.52399	6.97997e-07
0.52643	1.27478e-06	0.52643	7.13571e-07	0.52643	7.03185e-07
0.52887	1.2876e-06	0.52887	7.17233e-07	0.52887	7.07762e-07
0.53131	1.29858e-06	0.53131	7.20895e-07	0.53131	7.12035e-07
0.53375	1.3114e-06	0.53375	7.23641e-07	0.53375	7.17833e-07
0.53619	1.32361e-06	0.53619	7.27609e-07	0.53619	7.23326e-07
0.53864	1.33337e-06	0.53864	7.32492e-07	0.53864	7.27904e-07
0.54108	1.34527e-06	0.54108	7.34933e-07	0.54108	7.33397e-07
0.54352	1.35565e-06	0.54352	7.39205e-07	0.54352	7.38585e-07
0.54596	1.36999e-06	0.54596	7.43783e-07	0.54596	7.43773e-07
0.5484	1.38159e-06	0.5484	7.47445e-07	0.5484	7.50182e-07
0.55084	1.3938e-06	0.55084	7.51412e-07	0.55084	7.55675e-07
0.55328	1.40631e-06	0.55328	7.55075e-07	0.55328	7.61168e-07
0.55573	1.41974e-06	0.55573	7.59652e-07	0.55573	7.66051e-07
0.55817	1.43164e-06	0.55817	7.63619e-07	0.55817	7.71849e-07
0.56061	1.44354e-06	0.56061	7.66671e-07	0.56061	7.77342e-07
0.56305	1.45758e-06	0.56305	7.70944e-07	0.56305	7.83141e-07
0.56549	1.47009e-06	0.56549	7.75521e-07	0.56549	7.89244e-07
0.56793	1.48321e-06	0.56793	7.80404e-07	0.56793	7.96263e-07
0.57037	1.49573e-06	0.57037	7.83761e-07	0.57037	7.9962e-07
0.57281	1.50854e-06	0.57281	7.88339e-07	0.57281	8.0786e-07
0.57526	1.52136e-06	0.57526	7.92916e-07	0.57526	8.13658e-07
0.5777	1.53662e-06	0.5777	7.96578e-07	0.5777	8.20983e-07
0.58014	1.54761e-06	0.58014	8.00851e-07	0.58014	8.2556e-07
0.58258	1.56317e-06	0.58258	8.05429e-07	0.58258	8.32579e-07
0.58502	1.57507e-06	0.58502	8.0848e-07	0.58502	8.38378e-07
0.58746	1.58942e-06	0.58746	8.13058e-07	0.58746	8.44786e-07
0.5899	1.60284e-06	0.5899	8.16415e-07	0.5899	8.52721e-07
0.59235	1.61749e-06	0.59235	8.22824e-07	0.59235	8.56993e-07
0.59479	1.63214e-06	0.59479	8.26181e-07	0.59479	8.65233e-07
0.59723	1.64648e-06	0.59723	8.29843e-07	0.59723	8.72862e-07
0.59967	1.66144e-06	0.59967	8.35641e-07	0.59967	8.79271e-07
0.60211	1.67517e-06	0.60211	8.41134e-07	0.60211	8.86595e-07
0.60455	1.69043e-06	0.60455	8.45101e-07	0.60455	8.92394e-07
0.60699	1.7066e-06	0.60699	8.50595e-07	0.60699	9.00328e-07
0.60944	1.72095e-06	0.60944	8.53646e-07	0.60944	9.06737e-07
0.61188	1.73468e-06	0.61188	8.57919e-07	0.61188	9.15587e-07
0.61432	1.74811e-06	0.61432	8.63412e-07	0.61432	9.22301e-07
0.61676	1.76214e-06	0.61676	8.67684e-07	0.61676	9.30236e-07
0.6192	1.7771e-06	0.6192	8.72567e-07	0.6192	9.37865e-07
0.62164	1.79175e-06	0.62164	8.75314e-07	0.62164	9.44884e-07
0.62408	1.8064e-06	0.62408	8.81112e-07	0.62408	9.52819e-07
0.62653	1.82074e-06	0.62653	8.85995e-07	0.62653	9.60753e-07
0.62897	1.83447e-06	0.62897	8.91183e-07	0.62897	9.68382e-07
0.63141	1.84881e-06	0.63141	8.95455e-07	0.63141	9.76012e-07
0.63385	1.86224e-06	0.63385	9.00033e-07	0.63385	9.83336e-07
0.63629	1.8775e-06	0.63629	9.06747e-07	0.63629	9.92797e-07
0.63873	1.89245e-06	0.63873	9.10714e-07	0.63873	1.00043e-06
0.64117	1.90863e-06	0.64117	9.16818e-07	0.64117	1.00867e-06
0.64362	1.92053e-06	0.64362	9.21395e-07	0.64362	1.0166e-06
0.64606	1.93976e-06	0.64606	9.27804e-07	0.64606	1.02515e-06
0.6485	1.95288e-06	0.6485	9.34213e-07	0.6485	1.03247e-06
0.65094	1.96783e-06	0.65094	9.38485e-07	0.65094	1.04407e-06
0.65338	1.98157e-06	0.65338	9.43978e-07	0.65338	1.05261e-06
0.65582	1.99774e-06	0.65582	9.50692e-07	0.65582	1.05994e-06
0.65826	2.01147e-06	0.65826	9.5527e-07	0.65826	1.07031e-06
0.66071	2.02765e-06	0.66071	9.61068e-07	0.66071	1.07855e-06
0.66315	2.04169e-06	0.66315	9.65951e-07	0.66315	1.08496e-06
0.66559	2.05603e-06	0.66559	9.7297e-07	0.66559	1.09656e-06
0.66803	2.06976e-06	0.66803	9.77853e-07	0.66803	1.10358e-06
0.67047	2.08807e-06	0.67047	9.85177e-07	0.67047	1.11517e-06
0.67291	2.1015e-06	0.67291	9.92501e-07	0.67291	1.12494e-06
0.67535	2.11706e-06	0.67535	9.9891e-07	0.67535	1.13531e-06
0.6778	2.13415e-06	0.6778	1.00318e-06	0.6778	1.14447e-06
0.68024	2.15124e-06	0.68024	1.00868e-06	0.68024	1.15393e-06
0.68268	2.16406e-06	0.68268	1.01478e-06	0.68268	1.16247e-06
0.68512	2.18176e-06	0.68512	1.0221e-06	0.68512	1.17438e-06
0.68756	2.19519e-06	0.68756	1.02851e-06	0.68756	1.18506e-06
0.69	2.20892e-06	0.69	1.03584e-06	0.69	1.19574e-06
0.69244	2.2251e-06	0.69244	1.04224e-06	0.69244	1.2055e-06
0.69489	2.24127e-06	0.69489	1.04957e-06	0.69489	1.21649e-06
0.69733	2.25714e-06	0.69733	1.05659e-06	0.69733	1.22534e-06
0.69977	2.27423e-06	0.69977	1.06422e-06	0.69977	1.23694e-06
0.70221	2.28766e-06	0.70221	1.06971e-06	0.70221	1.24762e-06
0.70465	2.30536e-06	0.70465	1.07856e-06	0.70465	1.2586e-06
0.70709	2.32245e-06	0.70709	1.08436e-06	0.70709	1.27173e-06
0.70953	2.34045e-06	0.70953	1.09351e-06	0.70953	1.28027e-06
0.71198	2.35937e-06	0.71198	1.10175e-06	0.71198	1.29187e-06
0.71442	2.37585e-06	0.71442	1.10877e-06	0.71442	1.30316e-06
0.71686	2.39172e-06	0.71686	1.11671e-06	0.71686	1.31506e-06
0.7193	2.40942e-06	0.7193	1.12556e-06	0.7193	1.32574e-06
0.72174	2.42438e-06	0.72174	1.1338e-06	0.72174	1.34039e-06
0.72418	2.43994e-06	0.72418	1.14143e-06	0.72418	1.35046e-06
0.72662	2.45428e-06	0.72662	1.15089e-06	0.72662	1.36175e-06
0.72906	2.47168e-06	0.72906	1.15913e-06	0.72906	1.37274e-06
0.73151	2.48724e-06	0.73151	1.16889e-06	0.73151	1.388e-06
0.73395	2.50342e-06	0.73395	1.17652e-06	0.73395	1.39838e-06
0.73639	2.51807e-06	0.73639	1.18659e-06	0.73639	1.41028e-06
0.73883	2.53485e-06	0.73883	1.19605e-06	0.73883	1.42493e-06
0.74127	2.5495e-06	0.74127	1.20429e-06	0.74127	1.43713e-06
0.74371	2.56354e-06	0.74371	1.21253e-06	0.74371	1.44903e-06
0.74615	2.5788e-06	0.74615	1.22413e-06	0.74615	1.46399e-06
0.7486	2.59497e-06	0.7486	1.23206e-06	0.7486	1.47742e-06
0.75104	2.60779e-06	0.75104	1.24183e-06	0.75104	1.49115e-06
0.75348	2.62396e-06	0.75348	1.25312e-06	0.75348	1.50549e-06
0.75592	2.638e-06	0.75592	1.26197e-06	0.75592	1.51953e-06
0.75836	2.65478e-06	0.75836	1.27204e-06	0.75836	1.53357e-06
0.7608	2.66791e-06	0.7608	1.2815e-06	0.7608	1.54822e-06
0.76324	2.68408e-06	0.76324	1.29188e-06	0.76324	1.56439e-06
0.76569	2.69598e-06	0.76569	1.30073e-06	0.76569	1.57568e-06
0.76813	2.70911e-06	0.76813	1.31141e-06	0.76813	1.59338e-06
0.77057	2.72284e-06	0.77057	1.32392e-06	0.77057	1.60681e-06
0.77301	2.73566e-06	0.77301	1.33552e-06	0.77301	1.62329e-06
0.77545	2.75e-06	0.77545	1.34467e-06	0.77545	1.63885e-06
0.77789	2.76617e-06	0.77789	1.35627e-06	0.77789	1.65442e-06
0.78033	2.77777e-06	0.78033	1.36756e-06	0.78033	1.66937e-06
0.78278	2.79242e-06	0.78278	1.37824e-06	0.78278	1.68585e-06
0.78522	2.80676e-06	0.78522	1.38984e-06	0.78522	1.70203e-06
0.78766	2.82171e-06	0.78766	1.40144e-06	0.78766	1.71942e-06
0.7901	2.83484e-06	0.7901	1.41273e-06	0.7901	1.73651e-06
0.79254	2.84857e-06	0.79254	1.42433e-06	0.79254	1.7536e-06
0.79498	2.86139e-06	0.79498	1.43562e-06	0.79498	1.76855e-06
0.79742	2.87298e-06	0.79742	1.44721e-06	0.79742	1.78717e-06
0.79987	2.88214e-06	0.79987	1.45912e-06	0.79987	1.80426e-06
0.80231	2.89435e-06	0.80231	1.47254e-06	0.80231	1.82379e-06
0.80475	2.90503e-06	0.80475	1.48292e-06	0.80475	1.83813e-06
0.80719	2.91693e-06	0.80719	1.49635e-06	0.80719	1.85675e-06
0.80963	2.927e-06	0.80963	1.51161e-06	0.80963	1.87414e-06
0.81207	2.93951e-06	0.81207	1.5232e-06	0.81207	1.8949e-06
0.81451	2.94714e-06	0.81451	1.5348e-06	0.81451	1.91138e-06
0.81696	2.95935e-06	0.81696	1.55006e-06	0.81696	1.92969e-06
0.8194	2.96545e-06	0.8194	1.56104e-06	0.8194	1.94891e-06
0.82184	2.97583e-06	0.82184	1.57508e-06	0.82184	1.96783e-06
0.82428	2.98315e-06	0.82428	1.5879e-06	0.82428	1.98736e-06
0.82672	2.99322e-06	0.82672	1.60194e-06	0.82672	2.00567e-06
0.82916	2.99902e-06	0.82916	1.61353e-06	0.82916	2.02399e-06
0.8316	3.00818e-06	0.8316	1.63032e-06	0.8316	2.04504e-06
0.83405	3.01398e-06	0.83405	1.64375e-06	0.83405	2.06396e-06
0.83649	3.02008e-06	0.83649	1.65778e-06	0.83649	2.08716e-06
0.83893	3.02313e-06	0.83893	1.6706e-06	0.83893	2.10394e-06
0.84137	3.02954e-06	0.84137	1.68617e-06	0.84137	2.12591e-06
0.84381	3.03381e-06	0.84381	1.69959e-06	0.84381	2.14697e-06
0.84625	3.03686e-06	0.84625	1.71424e-06	0.84625	2.16559e-06
0.84869	3.04358e-06	0.84869	1.72859e-06	0.84869	2.18725e-06
0.85114	3.04785e-06	0.85114	1.74476e-06	0.85114	2.21075e-06
0.85358	3.0509e-06	0.85358	1.75788e-06	0.85358	2.23089e-06
0.85602	3.05517e-06	0.85602	1.77406e-06	0.85602	2.25317e-06
0.85846	3.05762e-06	0.85846	1.7884e-06	0.85846	2.27362e-06
0.8609	3.06006e-06	0.8609	1.80244e-06	0.8609	2.29651e-06
0.86334	3.06006e-06	0.86334	1.81739e-06	0.86334	2.31665e-06
0.86578	3.06006e-06	0.86578	1.83418e-06	0.86578	2.33954e-06
0.86823	3.06158e-06	0.86823	1.84943e-06	0.86823	2.36059e-06
0.87067	3.06372e-06	0.87067	1.86652e-06	0.87067	2.38501e-06
0.87311	3.06341e-06	0.87311	1.88026e-06	0.87311	2.40576e-06
0.87555	3.06463e-06	0.87555	1.89643e-06	0.87555	2.43048e-06
0.87799	3.06525e-06	0.87799	1.91169e-06	0.87799	2.45215e-06
0.88043	3.06372e-06	0.88043	1.92695e-06	0.88043	2.47748e-06
0.88287	3.06219e-06	0.88287	1.94343e-06	0.88287	2.49853e-06
0.88531	3.06128e-06	0.88531	1.96113e-06	0.88531	2.52173e-06
0.88776	3.06097e-06	0.88776	1.97578e-06	0.88776	2.54401e-06
0.8902	3.06189e-06	0.8902	1.99378e-06	0.8902	2.57056e-06
0.89264	3.06189e-06	0.89264	2.00965e-06	0.89264	2.59253e-06
0.89508	3.06128e-06	0.89508	2.02766e-06	0.89508	2.61725e-06
0.89752	3.05914e-06	0.89752	2.04231e-06	0.89752	2.63983e-06
0.89996	3.05823e-06	0.89996	2.06153e-06	0.89996	2.66608e-06
0.9024	3.05578e-06	0.9024	2.07679e-06	0.9024	2.69018e-06
0.90485	3.05426e-06	0.90485	2.09449e-06	0.90485	2.71582e-06
0.90729	3.05365e-06	0.90729	2.11067e-06	0.90729	2.74237e-06
0.90973	3.05548e-06	0.90973	2.12776e-06	0.90973	2.768e-06
0.91217	3.05151e-06	0.91217	2.14485e-06	0.91217	2.79089e-06
0.91461	3.0509e-06	0.91461	2.16438e-06	0.91461	2.81897e-06
0.91705	3.04693e-06	0.91705	2.18086e-06	0.91705	2.84277e-06
0.91949	3.04602e-06	0.91949	2.201e-06	0.91949	2.86993e-06
0.92194	3.04144e-06	0.92194	2.21626e-06	0.92194	2.89618e-06
0.92438	3.03992e-06	0.92438	2.2367e-06	0.92438	2.92242e-06
0.92682	3.03686e-06	0.92682	2.25532e-06	0.92682	2.95111e-06
0.92926	3.03625e-06	0.92926	2.27485e-06	0.92926	2.97827e-06
0.9317	3.03168e-06	0.9317	2.29255e-06	0.9317	3.0039e-06
0.93414	3.02679e-06	0.93414	2.3133e-06	0.93414	3.03351e-06
0.93658	3.0213e-06	0.93658	2.3307e-06	0.93658	3.05701e-06
0.93903	3.02313e-06	0.93903	2.35145e-06	0.93903	3.08752e-06
0.94147	3.02191e-06	0.94147	2.36945e-06	0.94147	3.11377e-06
0.94391	3.02099e-06	0.94391	2.38471e-06	0.94391	3.14398e-06
0.94635	3.01947e-06	0.94635	2.40363e-06	0.94635	3.17175e-06
0.94879	3.01916e-06	0.94879	2.42378e-06	0.94879	3.20227e-06
0.95123	3.01611e-06	0.95123	2.44087e-06	0.95123	3.23035e-06
0.95367	3.01459e-06	0.95367	2.45826e-06	0.95367	3.26208e-06
0.95612	3.0097e-06	0.95612	2.47596e-06	0.95612	3.29046e-06
0.95856	3.00787e-06	0.95856	2.4958e-06	0.95856	3.32098e-06
0.961	3.00329e-06	0.961	2.51289e-06	0.961	3.34875e-06
0.96344	3.00207e-06	0.96344	2.5315e-06	0.96344	3.37866e-06
0.96588	2.99811e-06	0.96588	2.55103e-06	0.96588	3.40887e-06
0.96832	2.99994e-06	0.96832	2.57209e-06	0.96832	3.44275e-06
0.97076	2.99719e-06	0.97076	2.58888e-06	0.97076	3.47296e-06
0.97321	2.99841e-06	0.97321	2.61085e-06	0.97321	3.50592e-06
0.97565	2.99841e-06	0.97565	2.62733e-06	0.97565	3.53766e-06
0.97809	2.99689e-06	0.97809	2.64625e-06	0.97809	3.56756e-06
0.98053	2.99414e-06	0.98053	2.66395e-06	0.98053	3.60052e-06
0.98297	2.99078e-06	0.98297	2.68134e-06	0.98297	3.63257e-06
0.98541	2.98926e-06	0.98541	2.70149e-06	0.98541	3.66614e-06
0.98785	2.98529e-06	0.98785	2.72163e-06	0.98785	3.70245e-06
0.9903	2.98407e-06	0.9903	2.74055e-06	0.9903	3.73236e-06
0.99274	2.98468e-06	0.99274	2.7613e-06	0.99274	3.7699e-06
0.99518	2.98407e-06	0.99518	2.77931e-06	0.99518	3.80194e-06
0.99762	2.98376e-06	0.99762	2.79884e-06	0.99762	3.83917e-06
1.00006	2.98224e-06	1.00006	2.81623e-06	1.00006	3.87274e-06
1.0025	2.97949e-06	1.0025	2.83576e-06	1.0025	3.90875e-06
1.00494	2.97583e-06	1.00494	2.85621e-06	1.00494	3.94476e-06
1.00739	2.97369e-06	1.00739	2.87727e-06	1.00739	3.98443e-06
1.00983	2.974e-06	1.00983	2.89527e-06	1.00983	4.018e-06
1.01227	2.974e-06	1.01227	2.91602e-06	1.01227	4.05707e-06
1.01471	2.97552e-06	1.01471	2.93403e-06	1.01471	4.09369e-06
1.01715	2.97613e-06	1.01715	2.9557e-06	1.01715	4.13092e-06
1.01959	2.97522e-06	1.01959	2.97279e-06	1.01959	4.16907e-06
1.02203	2.97369e-06	1.02203	2.99232e-06	1.02203	4.20843e-06
1.02448	2.974e-06	1.02448	3.01154e-06	1.02448	4.24505e-06
1.02692	2.974e-06	1.02692	3.03382e-06	1.02692	4.28747e-06
1.02936	2.97583e-06	1.02936	3.05335e-06	1.02936	4.32745e-06
1.0318	2.97858e-06	1.0318	3.07349e-06	1.0318	4.3717e-06
1.03424	2.97858e-06	1.03424	3.09394e-06	1.03424	4.40924e-06
1.03668	2.98285e-06	1.03668	3.115e-06	1.03668	4.45257e-06
1.03912	2.98407e-06	1.03912	3.13331e-06	1.03912	4.49469e-06
1.04156	2.98559e-06	1.04156	3.15315e-06	1.04156	4.53619e-06
1.04401	2.98865e-06	1.04401	3.17329e-06	1.04401	4.58044e-06
1.04645	2.98834e-06	1.04645	3.19557e-06	1.04645	4.62775e-06
1.04889	2.98926e-06	1.04889	3.21357e-06	1.04889	4.66925e-06
1.05133	2.99078e-06	1.05133	3.23524e-06	1.05133	4.71777e-06
1.05377	2.99109e-06	1.05377	3.25294e-06	1.05377	4.75897e-06
1.05621	2.9917e-06	1.05621	3.27522e-06	1.05621	4.80841e-06
1.05865	2.99231e-06	1.05865	3.29292e-06	1.05865	4.85419e-06
1.0611	2.99414e-06	1.0611	3.31611e-06	1.0611	4.90179e-06
1.06354	2.99505e-06	1.06354	3.33503e-06	1.06354	4.94849e-06
1.06598	2.99689e-06	1.06598	3.35914e-06	1.06598	5.0025e-06
1.06842	2.99994e-06	1.06842	3.37806e-06	1.06842	5.04706e-06
1.07086	3.0039e-06	1.07086	3.40003e-06	1.07086	5.09711e-06
1.0733	3.00635e-06	1.0733	3.42109e-06	1.0733	5.14685e-06
1.07574	3.01062e-06	1.07574	3.44428e-06	1.07574	5.19903e-06
1.07819	3.01306e-06	1.07819	3.46412e-06	1.07819	5.24908e-06
1.08063	3.01733e-06	1.08063	3.48579e-06	1.08063	5.30096e-06
1.08307	3.02222e-06	1.08307	3.50654e-06	1.08307	5.35284e-06
1.08551	3.02679e-06	1.08551	3.53065e-06	1.08551	5.40686e-06
1.08795	3.02954e-06	1.08795	3.55323e-06	1.08795	5.45996e-06
1.09039	3.03534e-06	1.09039	3.57642e-06	1.09039	5.51489e-06
1.09283	3.03992e-06	1.09283	3.5984e-06	1.09283	5.56677e-06
1.09528	3.0451e-06	1.09528	3.62159e-06	1.09528	5.62292e-06
1.09772	3.05151e-06	1.09772	3.64387e-06	1.09772	5.67847e-06
1.10016	3.0564e-06	1.10016	3.66676e-06	1.10016	5.73584e-06
1.1026	3.0628e-06	1.1026	3.69209e-06	1.1026	5.79169e-06
1.10504	3.06677e-06	1.10504	3.71681e-06	1.10504	5.84997e-06
1.10748	3.07135e-06	1.10748	3.73908e-06	1.10748	5.90521e-06
1.10992	3.07684e-06	1.10992	3.7635e-06	1.10992	5.97052e-06
1.11237	3.08081e-06	1.11237	3.78578e-06	1.11237	6.02545e-06
1.11481	3.08905e-06	1.11481	3.8108e-06	1.11481	6.08649e-06
1.11725	3.09485e-06	1.11725	3.83369e-06	1.11725	6.14447e-06
1.11969	3.10095e-06	1.11969	3.85841e-06	1.11969	6.2055e-06
1.12213	3.10797e-06	1.12213	3.88221e-06	1.12213	6.26349e-06
1.12457	3.11316e-06	1.12457	3.90968e-06	1.12457	6.32452e-06
1.12701	3.11896e-06	1.12701	3.93287e-06	1.12701	6.38556e-06
1.12946	3.12445e-06	1.12946	3.9585e-06	1.12946	6.44964e-06
1.1319	3.13025e-06	1.1319	3.98292e-06	1.1319	6.51068e-06
1.13434	3.13879e-06	1.13434	4.00947e-06	1.13434	6.57477e-06
1.13678	3.1449e-06	1.13678	4.0348e-06	1.13678	6.63885e-06
1.13922	3.15344e-06	1.13922	4.06043e-06	1.13922	6.69989e-06
1.14166	3.16138e-06	1.14166	4.08607e-06	1.14166	6.76398e-06
1.1441	3.16962e-06	1.1441	4.11506e-06	1.1441	6.83111e-06
1.14655	3.17602e-06	1.14655	4.14069e-06	1.14655	6.89215e-06
1.14899	3.18426e-06	1.14899	4.16877e-06	1.14899	6.95929e-06
1.15143	3.19159e-06	1.15143	4.19532e-06	1.15143	7.02338e-06
1.15387	3.20166e-06	1.15387	4.22614e-06	1.15387	7.09357e-06
1.15631	3.20685e-06	1.15631	4.253e-06	1.15631	7.1546e-06
1.15875	3.21753e-06	1.15875	4.28138e-06	1.15875	7.22174e-06
1.16119	3.22668e-06	1.16119	4.3119e-06	1.16119	7.28888e-06
1.16364	3.23584e-06	1.16364	4.3415e-06	1.16364	7.35907e-06
1.16608	3.24682e-06	1.16608	4.36836e-06	1.16608	7.42621e-06
1.16852	3.25842e-06	1.16852	4.40101e-06	1.16852	7.4964e-06
1.17096	3.26849e-06	1.17096	4.43031e-06	1.17096	7.56354e-06
1.1734	3.27826e-06	1.1734	4.46235e-06	1.1734	7.63373e-06
1.17584	3.28802e-06	1.17584	4.49256e-06	1.17584	7.70087e-06
1.17828	3.2987e-06	1.17828	4.52461e-06	1.17828	7.77106e-06
1.18073	3.31091e-06	1.18073	4.55665e-06	1.18073	7.84125e-06
1.18317	3.32312e-06	1.18317	4.58991e-06	1.18317	7.91449e-06
1.18561	3.32983e-06	1.18561	4.62379e-06	1.18561	7.98163e-06
1.18805	3.34173e-06	1.18805	4.65522e-06	1.18805	8.05487e-06
1.19049	3.35211e-06	1.19049	4.68879e-06	1.19049	8.12506e-06
1.19293	3.36279e-06	1.19293	4.72236e-06	1.19293	8.1983e-06
1.19537	3.37195e-06	1.19537	4.75684e-06	1.19537	8.26849e-06
1.19781	3.38507e-06	1.19781	4.79011e-06	1.19781	8.34173e-06
1.20026	3.39606e-06	1.20026	4.82612e-06	1.20026	8.41498e-06
1.2027	3.40796e-06	1.2027	4.86335e-06	1.2027	8.49127e-06
1.20514	3.41894e-06	1.20514	4.89814e-06	1.20514	8.56146e-06
1.20758	3.43207e-06	1.20758	4.93598e-06	1.20758	8.63776e-06
1.21002	3.44214e-06	1.21002	4.97138e-06	1.21002	8.711e-06
1.21246	3.45312e-06	1.21246	5.00861e-06	1.21246	8.78729e-06
1.2149	3.46411e-06	1.2149	5.04463e-06	1.2149	8.86053e-06
1.21735	3.47479e-06	1.21735	5.0843e-06	1.21735	8.93683e-06
1.21979	3.48944e-06	1.21979	5.12214e-06	1.21979	9.01312e-06
1.22223	3.50378e-06	1.22223	5.1609e-06	1.22223	9.09247e-06
1.22467	3.51843e-06	1.22467	5.19965e-06	1.22467	9.16876e-06
1.22711	3.53552e-06	1.22711	5.24085e-06	1.22711	9.24811e-06
1.22955	3.54986e-06	1.22955	5.27931e-06	1.22955	9.3244e-06
1.23199	3.56787e-06	1.23199	5.32081e-06	1.23199	9.4068e-06
1.23444	3.58374e-06	1.23444	5.36048e-06	1.23444	9.48309e-06
1.23688	3.60052e-06	1.23688	5.4026e-06	1.23688	9.56549e-06
1.23932	3.61517e-06	1.23932	5.44227e-06	1.23932	9.64484e-06
1.24176	3.63013e-06	1.24176	5.48713e-06	1.24176	9.72723e-06
1.2442	3.64599e-06	1.2442	5.5268e-06	1.2442	9.80353e-06
1.24664	3.664e-06	1.24664	5.57044e-06	1.24664	9.88898e-06
1.24908	3.67865e-06	1.24908	5.61256e-06	1.24908	9.97137e-06
1.25153	3.69513e-06	1.25153	5.65772e-06	1.25153	1.00507e-05
1.25397	3.71374e-06	1.25397	5.70045e-06	1.25397	1.01301e-05
1.25641	3.73297e-06	1.25641	5.74622e-06	1.25641	1.02125e-05
1.25885	3.75036e-06	1.25885	5.792e-06	1.25885	1.02979e-05
1.26129	3.76959e-06	1.26129	5.83778e-06	1.26129	1.03834e-05
1.26373	3.7876e-06	1.26373	5.88355e-06	1.26373	1.04688e-05
1.26617	3.80621e-06	1.26617	5.92933e-06	1.26617	1.05573e-05
1.26862	3.82452e-06	1.26862	5.97511e-06	1.26862	1.06397e-05
1.27106	3.8468e-06	1.27106	6.02393e-06	1.27106	1.07282e-05
1.2735	3.86664e-06	1.2735	6.07276e-06	1.2735	1.08106e-05
1.27594	3.88556e-06	1.27594	6.11854e-06	1.27594	1.08991e-05
1.27838	3.90906e-06	1.27838	6.16737e-06	1.27838	1.09876e-05
1.28082	3.93103e-06	1.28082	6.2162e-06	1.28082	1.10792e-05
1.28326	3.95239e-06	1.28326	6.26502e-06	1.28326	1.11677e-05
1.28571	3.97803e-06	1.28571	6.3169e-06	1.28571	1.12562e-05
1.28815	4.00275e-06	1.28815	6.36573e-06	1.28815	1.13477e-05
1.29059	4.02685e-06	1.29059	6.41761e-06	1.29059	1.14393e-05
1.29303	4.05096e-06	1.29303	6.46644e-06	1.29303	1.15278e-05
1.29547	4.07507e-06	1.29547	6.51832e-06	1.29547	1.16163e-05
1.29791	4.10437e-06	1.29791	6.5702e-06	1.29791	1.17078e-05
1.30035	4.13275e-06	1.30035	6.62513e-06	1.30035	1.18024e-05
1.3028	4.1593e-06	1.3028	6.67701e-06	1.3028	1.18909e-05
1.30524	4.18829e-06	1.30524	6.72889e-06	1.30524	1.19886e-05
1.30768	4.21393e-06	1.30768	6.78382e-06	1.30768	1.20801e-05
1.31012	4.24353e-06	1.31012	6.83875e-06	1.31012	1.21778e-05
1.31256	4.26855e-06	1.31256	6.89063e-06	1.31256	1.22693e-05
1.315	4.29846e-06	1.315	6.94557e-06	1.315	1.2364e-05
1.31744	4.32715e-06	1.31744	7.00355e-06	1.31744	1.24616e-05
1.31989	4.35828e-06	1.31989	7.06153e-06	1.31989	1.25623e-05
1.32233	4.38727e-06	1.32233	7.11646e-06	1.32233	1.26569e-05
1.32477	4.41412e-06	1.32477	7.17445e-06	1.32477	1.27576e-05
1.32721	4.44311e-06	1.32721	7.22938e-06	1.32721	1.28553e-05
1.32965	4.47668e-06	1.32965	7.29041e-06	1.32965	1.2959e-05
1.33209	4.50903e-06	1.33209	7.3484e-06	1.33209	1.30598e-05
1.33453	4.54413e-06	1.33453	7.40638e-06	1.33453	1.31605e-05
1.33698	4.57709e-06	1.33698	7.46436e-06	1.33698	1.32612e-05
1.33942	4.61615e-06	1.33942	7.5254e-06	1.33942	1.3368e-05
1.34186	4.65063e-06	1.34186	7.58338e-06	1.34186	1.34717e-05
1.3443	4.68756e-06	1.3443	7.64747e-06	1.3443	1.35786e-05
1.34674	4.72235e-06	1.34674	7.7085e-06	1.34674	1.36823e-05
1.34918	4.76294e-06	1.34918	7.77259e-06	1.34918	1.37922e-05
1.35162	4.79559e-06	1.35162	7.83058e-06	1.35162	1.38929e-05
1.35406	4.83313e-06	1.35406	7.89466e-06	1.35406	1.39997e-05
1.35651	4.86883e-06	1.35651	7.95875e-06	1.35651	1.41096e-05
1.35895	4.90698e-06	1.35895	8.02284e-06	1.35895	1.42194e-05
1.36139	4.94086e-06	1.36139	8.08692e-06	1.36139	1.43232e-05
1.36383	4.98083e-06	1.36383	8.15406e-06	1.36383	1.44361e-05
1.36627	5.01715e-06	1.36627	8.21815e-06	1.36627	1.45399e-05
1.36871	5.05804e-06	1.36871	8.28224e-06	1.36871	1.46528e-05
1.37115	5.09711e-06	1.37115	8.35243e-06	1.37115	1.47596e-05
1.3736	5.13891e-06	1.3736	8.41651e-06	1.3736	1.48694e-05
1.37604	5.17737e-06	1.37604	8.4867e-06	1.37604	1.49824e-05
1.37848	5.22131e-06	1.37848	8.55689e-06	1.37848	1.50953e-05
1.38092	5.26221e-06	1.38092	8.62403e-06	1.38092	1.52051e-05
1.38336	5.30615e-06	1.38336	8.69727e-06	1.38336	1.53242e-05
1.3858	5.34765e-06	1.3858	8.76746e-06	1.3858	1.54371e-05
1.38824	5.39435e-06	1.38824	8.84071e-06	1.38824	1.5553e-05
1.39069	5.43707e-06	1.39069	8.9109e-06	1.39069	1.5666e-05
1.39313	5.48315e-06	1.39313	8.98414e-06	1.39313	1.5785e-05
1.39557	5.52801e-06	1.39557	9.05738e-06	1.39557	1.5904e-05
1.39801	5.57745e-06	1.39801	9.13368e-06	1.39801	1.60261e-05
1.40045	5.62384e-06	1.40045	9.20387e-06	1.40045	1.6142e-05
1.40289	5.67175e-06	1.40289	9.28321e-06	1.40289	1.62641e-05
1.40533	5.71631e-06	1.40533	9.35645e-06	1.40533	1.63831e-05
1.40778	5.76391e-06	1.40778	9.4358e-06	1.40778	1.65052e-05
1.41022	5.81549e-06	1.41022	9.51209e-06	1.41022	1.66273e-05
1.41266	5.86432e-06	1.41266	9.58839e-06	1.41266	1.67524e-05
1.4151	5.91284e-06	1.4151	9.66773e-06	1.4151	1.68775e-05
1.41754	5.96747e-06	1.41754	9.75013e-06	1.41754	1.70057e-05
1.41998	6.0163e-06	1.41998	9.82642e-06	1.41998	1.71308e-05
1.42242	6.07123e-06	1.42242	9.90882e-06	1.42242	1.7262e-05
1.42487	6.12005e-06	1.42487	9.98817e-06	1.42487	1.73871e-05
1.42731	6.17499e-06	1.42731	1.00706e-05	1.42731	1.75214e-05
1.42975	6.22687e-06	1.42975	1.01499e-05	1.42975	1.76465e-05
1.43219	6.2818e-06	1.43219	1.02354e-05	1.43219	1.77808e-05
1.43463	6.33368e-06	1.43463	1.03178e-05	1.43463	1.79151e-05
1.43707	6.38861e-06	1.43707	1.04063e-05	1.43707	1.80524e-05
1.43951	6.44049e-06	1.43951	1.04887e-05	1.43951	1.81867e-05
1.44196	6.49542e-06	1.44196	1.05802e-05	1.44196	1.83271e-05
1.4444	6.5473e-06	1.4444	1.06657e-05	1.4444	1.84583e-05
1.44684	6.60528e-06	1.44684	1.07542e-05	1.44684	1.86017e-05
1.44928	6.66022e-06	1.44928	1.08427e-05	1.44928	1.87391e-05
1.45172	6.71515e-06	1.45172	1.09342e-05	1.45172	1.88795e-05
1.45416	6.77618e-06	1.45416	1.10258e-05	1.45416	1.90259e-05
1.4566	6.83417e-06	1.4566	1.11204e-05	1.4566	1.91724e-05
1.45905	6.8891e-06	1.45905	1.12089e-05	1.45905	1.93128e-05
1.46149	6.95318e-06	1.46149	1.13065e-05	1.46149	1.94623e-05
1.46393	7.00812e-06	1.46393	1.13981e-05	1.46393	1.96027e-05
1.46637	7.0722e-06	1.46637	1.14957e-05	1.46637	1.97584e-05
1.46881	7.13324e-06	1.46881	1.15903e-05	1.46881	1.99048e-05
1.47125	7.19122e-06	1.47125	1.1688e-05	1.47125	2.00544e-05
1.47369	7.25531e-06	1.47369	1.17857e-05	1.47369	2.0207e-05
1.47614	7.3194e-06	1.47614	1.18864e-05	1.47614	2.03657e-05
1.47858	7.38043e-06	1.47858	1.1984e-05	1.47858	2.05182e-05
1.48102	7.44757e-06	1.48102	1.20908e-05	1.48102	2.06769e-05
1.48346	7.51166e-06	1.48346	1.21885e-05	1.48346	2.08326e-05
1.4859	7.5788e-06	1.4859	1.22922e-05	1.4859	2.09913e-05
1.48834	7.64288e-06	1.48834	1.2396e-05	1.48834	2.115e-05
1.49078	7.71307e-06	1.49078	1.25028e-05	1.49078	2.13087e-05
1.49323	7.78021e-06	1.49323	1.26096e-05	1.49323	2.14734e-05
1.49567	7.85345e-06	1.49567	1.27195e-05	1.49567	2.16413e-05
1.49811	7.92059e-06	1.49811	1.28263e-05	1.49811	2.1803e-05
1.50055	7.99689e-06	1.50055	1.29362e-05	1.50055	2.19739e-05

## Sheet: Figure S10(e)
-1.4975	-2.83386e-05	-1.4975	-4.55353e-05	-1.4975	-4.64539e-05
-1.49506	-2.33765e-05	-1.49506	-3.93707e-05	-1.49506	-3.94012e-05
-1.49261	-2.03674e-05	-1.49261	-3.55072e-05	-1.49261	-3.51807e-05
-1.49017	-1.83441e-05	-1.49017	-3.27606e-05	-1.49017	-3.22632e-05
-1.48773	-1.68427e-05	-1.48773	-3.06458e-05	-1.48773	-3.00598e-05
-1.48529	-1.56677e-05	-1.48529	-2.8949e-05	-1.48529	-2.83203e-05
-1.48285	-1.47064e-05	-1.48285	-2.75299e-05	-1.48285	-2.68799e-05
-1.48041	-1.38977e-05	-1.48041	-2.63275e-05	-1.48041	-2.56653e-05
-1.47797	-1.3205e-05	-1.47797	-2.52716e-05	-1.47797	-2.46124e-05
-1.47552	-1.25946e-05	-1.47552	-2.43408e-05	-1.47552	-2.36877e-05
-1.47308	-1.20636e-05	-1.47308	-2.35046e-05	-1.47308	-2.28638e-05
-1.47064	-1.15936e-05	-1.47064	-2.27539e-05	-1.47064	-2.21252e-05
-1.4682	-1.11633e-05	-1.4682	-2.20612e-05	-1.4682	-2.14478e-05
-1.46576	-1.07788e-05	-1.46576	-2.14325e-05	-1.46576	-2.08344e-05
-1.46332	-1.04279e-05	-1.46332	-2.08527e-05	-1.46332	-2.02637e-05
-1.46088	-1.01105e-05	-1.46088	-2.03064e-05	-1.46088	-1.97357e-05
-1.45844	-9.8114e-06	-1.45844	-1.97968e-05	-1.45844	-1.92474e-05
-1.45599	-9.53064e-06	-1.45599	-1.93237e-05	-1.45599	-1.87836e-05
-1.45355	-9.27124e-06	-1.45355	-1.8869e-05	-1.45355	-1.83472e-05
-1.45111	-9.01794e-06	-1.45111	-1.84479e-05	-1.45111	-1.79443e-05
-1.44867	-8.77991e-06	-1.44867	-1.8042e-05	-1.44867	-1.75537e-05
-1.44623	-8.56018e-06	-1.44623	-1.76666e-05	-1.44623	-1.71936e-05
-1.44379	-8.35266e-06	-1.44379	-1.73004e-05	-1.44379	-1.68396e-05
-1.44135	-8.15735e-06	-1.44135	-1.69525e-05	-1.44135	-1.651e-05
-1.4389	-7.96814e-06	-1.4389	-1.66168e-05	-1.4389	-1.61926e-05
-1.43646	-7.78809e-06	-1.43646	-1.63025e-05	-1.43646	-1.58875e-05
-1.43402	-7.61414e-06	-1.43402	-1.59912e-05	-1.43402	-1.55914e-05
-1.43158	-7.45239e-06	-1.43158	-1.56982e-05	-1.43158	-1.53137e-05
-1.42914	-7.29675e-06	-1.42914	-1.54144e-05	-1.42914	-1.50421e-05
-1.4267	-7.15027e-06	-1.4267	-1.51428e-05	-1.4267	-1.47858e-05
-1.42426	-7.00684e-06	-1.42426	-1.48773e-05	-1.42426	-1.45325e-05
-1.42181	-6.87256e-06	-1.42181	-1.46271e-05	-1.42181	-1.42944e-05
-1.41937	-6.74133e-06	-1.41937	-1.43829e-05	-1.41937	-1.40594e-05
-1.41693	-6.61621e-06	-1.41693	-1.41449e-05	-1.41693	-1.38336e-05
-1.41449	-6.49719e-06	-1.41449	-1.39099e-05	-1.41449	-1.36139e-05
-1.41205	-6.38123e-06	-1.41205	-1.36902e-05	-1.41205	-1.34003e-05
-1.40961	-6.26831e-06	-1.40961	-1.34674e-05	-1.40961	-1.31958e-05
-1.40717	-6.16455e-06	-1.40717	-1.32568e-05	-1.40717	-1.29944e-05
-1.40472	-6.06079e-06	-1.40472	-1.30524e-05	-1.40472	-1.27991e-05
-1.40228	-5.96008e-06	-1.40228	-1.2854e-05	-1.40228	-1.26099e-05
-1.39984	-5.86243e-06	-1.39984	-1.26587e-05	-1.39984	-1.24268e-05
-1.3974	-5.77087e-06	-1.3974	-1.24664e-05	-1.3974	-1.22467e-05
-1.39496	-5.68237e-06	-1.39496	-1.22803e-05	-1.39496	-1.20697e-05
-1.39252	-5.59387e-06	-1.39252	-1.21033e-05	-1.39252	-1.19019e-05
-1.39008	-5.51147e-06	-1.39008	-1.19263e-05	-1.39008	-1.1731e-05
-1.38763	-5.43213e-06	-1.38763	-1.17554e-05	-1.38763	-1.15753e-05
-1.38519	-5.35278e-06	-1.38519	-1.15845e-05	-1.38519	-1.14136e-05
-1.38275	-5.27344e-06	-1.38275	-1.14258e-05	-1.38275	-1.12579e-05
-1.38031	-5.2002e-06	-1.38031	-1.12671e-05	-1.38031	-1.11053e-05
-1.37787	-5.12695e-06	-1.37787	-1.11115e-05	-1.37787	-1.09589e-05
-1.37543	-5.05371e-06	-1.37543	-1.09558e-05	-1.37543	-1.08124e-05
-1.37299	-4.98657e-06	-1.37299	-1.08093e-05	-1.37299	-1.0672e-05
-1.37054	-4.91638e-06	-1.37054	-1.06598e-05	-1.37054	-1.05316e-05
-1.3681	-4.84924e-06	-1.3681	-1.05194e-05	-1.3681	-1.03973e-05
-1.36566	-4.7821e-06	-1.36566	-1.0376e-05	-1.36566	-1.02631e-05
-1.36322	-4.71802e-06	-1.36322	-1.02417e-05	-1.36322	-1.01349e-05
-1.36078	-4.65607e-06	-1.36078	-1.01074e-05	-1.36078	-1.00098e-05
-1.35834	-4.59381e-06	-1.35834	-9.9762e-06	-1.35834	-9.88464e-06
-1.3559	-4.53064e-06	-1.3559	-9.84192e-06	-1.3559	-9.76257e-06
-1.35345	-4.47205e-06	-1.35345	-9.7168e-06	-1.35345	-9.64355e-06
-1.35101	-4.41101e-06	-1.35101	-9.58862e-06	-1.35101	-9.52454e-06
-1.34857	-4.35516e-06	-1.34857	-9.46655e-06	-1.34857	-9.41162e-06
-1.34613	-4.29596e-06	-1.34613	-9.34448e-06	-1.34613	-9.29565e-06
-1.34369	-4.24377e-06	-1.34369	-9.22546e-06	-1.34369	-9.18884e-06
-1.34125	-4.18915e-06	-1.34125	-9.1095e-06	-1.34125	-9.07898e-06
-1.33881	-4.13605e-06	-1.33881	-8.99353e-06	-1.33881	-8.97217e-06
-1.33636	-4.08325e-06	-1.33636	-8.88062e-06	-1.33636	-8.86841e-06
-1.33392	-4.03168e-06	-1.33392	-8.77075e-06	-1.33392	-8.7677e-06
-1.33148	-3.98163e-06	-1.33148	-8.66394e-06	-1.33148	-8.66699e-06
-1.32904	-3.93372e-06	-1.32904	-8.56018e-06	-1.32904	-8.56934e-06
-1.3266	-3.8855e-06	-1.3266	-8.45337e-06	-1.3266	-8.47168e-06
-1.32416	-3.83972e-06	-1.32416	-8.34961e-06	-1.32416	-8.37708e-06
-1.32172	-3.79547e-06	-1.32172	-8.2489e-06	-1.32172	-8.28552e-06
-1.31927	-3.75122e-06	-1.31927	-8.14819e-06	-1.31927	-8.19092e-06
-1.31683	-3.7085e-06	-1.31683	-8.05054e-06	-1.31683	-8.09937e-06
-1.31439	-3.66516e-06	-1.31439	-7.95593e-06	-1.31439	-8.01086e-06
-1.31195	-3.62305e-06	-1.31195	-7.85828e-06	-1.31195	-7.92236e-06
-1.30951	-3.58154e-06	-1.30951	-7.76672e-06	-1.30951	-7.83691e-06
-1.30707	-3.53943e-06	-1.30707	-7.67212e-06	-1.30707	-7.75146e-06
-1.30463	-3.49854e-06	-1.30463	-7.58362e-06	-1.30463	-7.66907e-06
-1.30219	-3.45551e-06	-1.30219	-7.49512e-06	-1.30219	-7.58667e-06
-1.29974	-3.41705e-06	-1.29974	-7.40662e-06	-1.29974	-7.50427e-06
-1.2973	-3.37738e-06	-1.2973	-7.31812e-06	-1.2973	-7.42188e-06
-1.29486	-3.3371e-06	-1.29486	-7.23572e-06	-1.29486	-7.34558e-06
-1.29242	-3.29926e-06	-1.29242	-7.15027e-06	-1.29242	-7.26624e-06
-1.28998	-3.26111e-06	-1.28998	-7.06787e-06	-1.28998	-7.18994e-06
-1.28754	-3.22235e-06	-1.28754	-6.98547e-06	-1.28754	-7.11365e-06
-1.2851	-3.18695e-06	-1.2851	-6.90613e-06	-1.2851	-7.04041e-06
-1.28265	-3.15002e-06	-1.28265	-6.82678e-06	-1.28265	-6.96716e-06
-1.28021	-3.1134e-06	-1.28021	-6.74744e-06	-1.28021	-6.89392e-06
-1.27777	-3.08105e-06	-1.27777	-6.67114e-06	-1.27777	-6.82068e-06
-1.27533	-3.04382e-06	-1.27533	-6.59485e-06	-1.27533	-6.75354e-06
-1.27289	-3.01239e-06	-1.27289	-6.51855e-06	-1.27289	-6.68335e-06
-1.27045	-2.97974e-06	-1.27045	-6.44836e-06	-1.27045	-6.61316e-06
-1.26801	-2.94922e-06	-1.26801	-6.37512e-06	-1.26801	-6.54602e-06
-1.26556	-2.91626e-06	-1.26556	-6.30493e-06	-1.26556	-6.48193e-06
-1.26312	-2.88727e-06	-1.26312	-6.23474e-06	-1.26312	-6.41479e-06
-1.26068	-2.85614e-06	-1.26068	-6.16455e-06	-1.26068	-6.35071e-06
-1.25824	-2.8244e-06	-1.25824	-6.09436e-06	-1.25824	-6.28662e-06
-1.2558	-2.79633e-06	-1.2558	-6.02722e-06	-1.2558	-6.22559e-06
-1.25336	-2.76886e-06	-1.25336	-5.96008e-06	-1.25336	-6.15845e-06
-1.25092	-2.74323e-06	-1.25092	-5.896e-06	-1.25092	-6.10046e-06
-1.24847	-2.7179e-06	-1.24847	-5.82886e-06	-1.24847	-6.03943e-06
-1.24603	-2.68982e-06	-1.24603	-5.76782e-06	-1.24603	-5.98145e-06
-1.24359	-2.66449e-06	-1.24359	-5.70068e-06	-1.24359	-5.92041e-06
-1.24115	-2.63977e-06	-1.24115	-5.63965e-06	-1.24115	-5.86243e-06
-1.23871	-2.61322e-06	-1.23871	-5.57556e-06	-1.23871	-5.8075e-06
-1.23627	-2.58789e-06	-1.23627	-5.51758e-06	-1.23627	-5.74951e-06
-1.23383	-2.56073e-06	-1.23383	-5.45349e-06	-1.23383	-5.69153e-06
-1.23138	-2.53632e-06	-1.23138	-5.39856e-06	-1.23138	-5.63965e-06
-1.22894	-2.51007e-06	-1.22894	-5.33752e-06	-1.22894	-5.58472e-06
-1.2265	-2.48596e-06	-1.2265	-5.28259e-06	-1.2265	-5.52979e-06
-1.22406	-2.46033e-06	-1.22406	-5.22461e-06	-1.22406	-5.47791e-06
-1.22162	-2.435e-06	-1.22162	-5.16663e-06	-1.22162	-5.42603e-06
-1.21918	-2.41028e-06	-1.21918	-5.10864e-06	-1.21918	-5.37109e-06
-1.21674	-2.38861e-06	-1.21674	-5.05676e-06	-1.21674	-5.32227e-06
-1.21429	-2.36389e-06	-1.21429	-4.99878e-06	-1.21429	-5.27039e-06
-1.21185	-2.34192e-06	-1.21185	-4.9469e-06	-1.21185	-5.22156e-06
-1.20941	-2.32056e-06	-1.20941	-4.89197e-06	-1.20941	-5.17273e-06
-1.20697	-2.29919e-06	-1.20697	-4.84314e-06	-1.20697	-5.1239e-06
-1.20453	-2.27783e-06	-1.20453	-4.79126e-06	-1.20453	-5.07507e-06
-1.20209	-2.2583e-06	-1.20209	-4.74152e-06	-1.20209	-5.02625e-06
-1.19965	-2.23877e-06	-1.19965	-4.68903e-06	-1.19965	-4.97742e-06
-1.1972	-2.21985e-06	-1.1972	-4.6402e-06	-1.1972	-4.93469e-06
-1.19476	-2.20001e-06	-1.19476	-4.58954e-06	-1.19476	-4.88586e-06
-1.19232	-2.18079e-06	-1.19232	-4.54254e-06	-1.19232	-4.84314e-06
-1.18988	-2.16034e-06	-1.18988	-4.49249e-06	-1.18988	-4.79736e-06
-1.18744	-2.14294e-06	-1.18744	-4.4458e-06	-1.18744	-4.75342e-06
-1.185	-2.12433e-06	-1.185	-4.39941e-06	-1.185	-4.711e-06
-1.18256	-2.10724e-06	-1.18256	-4.35303e-06	-1.18256	-4.66736e-06
-1.18011	-2.08801e-06	-1.18011	-4.30603e-06	-1.18011	-4.62372e-06
-1.17767	-2.0697e-06	-1.17767	-4.26117e-06	-1.17767	-4.5816e-06
-1.17523	-2.04987e-06	-1.17523	-4.21661e-06	-1.17523	-4.54163e-06
-1.17279	-2.03217e-06	-1.17279	-4.17358e-06	-1.17279	-4.50012e-06
-1.17035	-2.01324e-06	-1.17035	-4.12872e-06	-1.17035	-4.45862e-06
-1.16791	-1.99646e-06	-1.16791	-4.086e-06	-1.16791	-4.41864e-06
-1.16547	-1.97601e-06	-1.16547	-4.04297e-06	-1.16547	-4.3811e-06
-1.16302	-1.95801e-06	-1.16302	-4.00177e-06	-1.16302	-4.34204e-06
-1.16058	-1.94366e-06	-1.16058	-3.95844e-06	-1.16058	-4.30237e-06
-1.15814	-1.92627e-06	-1.15814	-3.91998e-06	-1.15814	-4.26453e-06
-1.1557	-1.9104e-06	-1.1557	-3.87817e-06	-1.1557	-4.22729e-06
-1.15326	-1.89545e-06	-1.15326	-3.83881e-06	-1.15326	-4.19159e-06
-1.15082	-1.88019e-06	-1.15082	-3.79974e-06	-1.15082	-4.15466e-06
-1.14838	-1.86554e-06	-1.14838	-3.76038e-06	-1.14838	-4.11743e-06
-1.14594	-1.84937e-06	-1.14594	-3.72009e-06	-1.14594	-4.08112e-06
-1.14349	-1.83441e-06	-1.14349	-3.68347e-06	-1.14349	-4.04755e-06
-1.14105	-1.82068e-06	-1.14105	-3.64471e-06	-1.14105	-4.01123e-06
-1.13861	-1.80511e-06	-1.13861	-3.6087e-06	-1.13861	-3.97797e-06
-1.13617	-1.79138e-06	-1.13617	-3.56995e-06	-1.13617	-3.94318e-06
-1.13373	-1.77734e-06	-1.13373	-3.53424e-06	-1.13373	-3.91083e-06
-1.13129	-1.7627e-06	-1.13129	-3.49945e-06	-1.13129	-3.87756e-06
-1.12885	-1.74835e-06	-1.12885	-3.46252e-06	-1.12885	-3.84521e-06
-1.1264	-1.73401e-06	-1.1264	-3.42682e-06	-1.1264	-3.81317e-06
-1.12396	-1.72089e-06	-1.12396	-3.39203e-06	-1.12396	-3.78052e-06
-1.12152	-1.70746e-06	-1.12152	-3.35632e-06	-1.12152	-3.74786e-06
-1.11908	-1.69373e-06	-1.11908	-3.32275e-06	-1.11908	-3.71887e-06
-1.11664	-1.67938e-06	-1.11664	-3.28796e-06	-1.11664	-3.68774e-06
-1.1142	-1.66626e-06	-1.1142	-3.25531e-06	-1.1142	-3.65814e-06
-1.11176	-1.65497e-06	-1.11176	-3.21991e-06	-1.11176	-3.62793e-06
-1.10931	-1.64124e-06	-1.10931	-3.18848e-06	-1.10931	-3.59619e-06
-1.10687	-1.62872e-06	-1.10687	-3.15582e-06	-1.10687	-3.56903e-06
-1.10443	-1.61499e-06	-1.10443	-3.12378e-06	-1.10443	-3.53973e-06
-1.10199	-1.6037e-06	-1.10199	-3.09082e-06	-1.10199	-3.51013e-06
-1.09955	-1.58966e-06	-1.09955	-3.06091e-06	-1.09955	-3.48236e-06
-1.09711	-1.57867e-06	-1.09711	-3.03009e-06	-1.09711	-3.45337e-06
-1.09467	-1.56647e-06	-1.09467	-2.99957e-06	-1.09467	-3.4259e-06
-1.09222	-1.55579e-06	-1.09222	-2.96997e-06	-1.09222	-3.39844e-06
-1.08978	-1.54236e-06	-1.08978	-2.94006e-06	-1.08978	-3.37036e-06
-1.08734	-1.52893e-06	-1.08734	-2.91046e-06	-1.08734	-3.34442e-06
-1.0849	-1.51733e-06	-1.0849	-2.87933e-06	-1.0849	-3.31818e-06
-1.08246	-1.50665e-06	-1.08246	-2.84882e-06	-1.08246	-3.29132e-06
-1.08002	-1.49597e-06	-1.08002	-2.82135e-06	-1.08002	-3.2666e-06
-1.07758	-1.48407e-06	-1.07758	-2.79236e-06	-1.07758	-3.23853e-06
-1.07513	-1.4743e-06	-1.07513	-2.76459e-06	-1.07513	-3.21503e-06
-1.07269	-1.4624e-06	-1.07269	-2.73621e-06	-1.07269	-3.18756e-06
-1.07025	-1.45294e-06	-1.07025	-2.70935e-06	-1.07025	-3.16406e-06
-1.06781	-1.44165e-06	-1.06781	-2.68311e-06	-1.06781	-3.14056e-06
-1.06537	-1.43097e-06	-1.06537	-2.65564e-06	-1.06537	-3.11707e-06
-1.06293	-1.42151e-06	-1.06293	-2.62848e-06	-1.06293	-3.09113e-06
-1.06049	-1.409e-06	-1.06049	-2.60406e-06	-1.06049	-3.06854e-06
-1.05804	-1.40045e-06	-1.05804	-2.57751e-06	-1.05804	-3.04535e-06
-1.0556	-1.38977e-06	-1.0556	-2.55249e-06	-1.0556	-3.02277e-06
-1.05316	-1.37848e-06	-1.05316	-2.52655e-06	-1.05316	-3.00018e-06
-1.05072	-1.36841e-06	-1.05072	-2.50183e-06	-1.05072	-2.97638e-06
-1.04828	-1.35925e-06	-1.04828	-2.47772e-06	-1.04828	-2.9541e-06
-1.04584	-1.34888e-06	-1.04584	-2.45239e-06	-1.04584	-2.93182e-06
-1.0434	-1.33942e-06	-1.0434	-2.42737e-06	-1.0434	-2.91016e-06
-1.04095	-1.32935e-06	-1.04095	-2.4054e-06	-1.04095	-2.88849e-06
-1.03851	-1.31958e-06	-1.03851	-2.38098e-06	-1.03851	-2.8653e-06
-1.03607	-1.3092e-06	-1.03607	-2.35901e-06	-1.03607	-2.84607e-06
-1.03363	-1.30005e-06	-1.03363	-2.33368e-06	-1.03363	-2.82501e-06
-1.03119	-1.28967e-06	-1.03119	-2.31201e-06	-1.03119	-2.80518e-06
-1.02875	-1.28174e-06	-1.02875	-2.29065e-06	-1.02875	-2.7832e-06
-1.02631	-1.27075e-06	-1.02631	-2.26807e-06	-1.02631	-2.76367e-06
-1.02386	-1.25977e-06	-1.02386	-2.24548e-06	-1.02386	-2.74414e-06
-1.02142	-1.25122e-06	-1.02142	-2.22443e-06	-1.02142	-2.72461e-06
-1.01898	-1.24054e-06	-1.01898	-2.20337e-06	-1.01898	-2.70508e-06
-1.01654	-1.2326e-06	-1.01654	-2.18201e-06	-1.01654	-2.68585e-06
-1.0141	-1.22284e-06	-1.0141	-2.16034e-06	-1.0141	-2.66449e-06
-1.01166	-1.2149e-06	-1.01166	-2.14081e-06	-1.01166	-2.64618e-06
-1.00922	-1.20697e-06	-1.00922	-2.11914e-06	-1.00922	-2.62543e-06
-1.00677	-1.19965e-06	-1.00677	-2.09991e-06	-1.00677	-2.60773e-06
-1.00433	-1.19202e-06	-1.00433	-2.07733e-06	-1.00433	-2.58881e-06
-1.00189	-1.1853e-06	-1.00189	-2.05994e-06	-1.00189	-2.57141e-06
-0.99945	-1.17584e-06	-0.99945	-2.03949e-06	-0.99945	-2.55157e-06
-0.99701	-1.17157e-06	-0.99701	-2.01935e-06	-0.99701	-2.53357e-06
-0.99457	-1.16394e-06	-0.99457	-2.00104e-06	-0.99457	-2.51526e-06
-0.99213	-1.15753e-06	-0.99213	-1.9809e-06	-0.99213	-2.49664e-06
-0.98969	-1.1499e-06	-0.98969	-1.96289e-06	-0.98969	-2.47986e-06
-0.98724	-1.14319e-06	-0.98724	-1.94366e-06	-0.98724	-2.46155e-06
-0.9848	-1.13678e-06	-0.9848	-1.92596e-06	-0.9848	-2.44385e-06
-0.98236	-1.13037e-06	-0.98236	-1.90857e-06	-0.98236	-2.42767e-06
-0.97992	-1.12427e-06	-0.97992	-1.89026e-06	-0.97992	-2.41058e-06
-0.97748	-1.11603e-06	-0.97748	-1.87073e-06	-0.97748	-2.3941e-06
-0.97504	-1.10596e-06	-0.97504	-1.85303e-06	-0.97504	-2.37915e-06
-0.9726	-1.10016e-06	-0.9726	-1.83655e-06	-0.9726	-2.36145e-06
-0.97015	-1.09192e-06	-0.97015	-1.81824e-06	-0.97015	-2.34467e-06
-0.96771	-1.08429e-06	-0.96771	-1.80054e-06	-0.96771	-2.33002e-06
-0.96527	-1.07758e-06	-0.96527	-1.78314e-06	-0.96527	-2.31354e-06
-0.96283	-1.07025e-06	-0.96283	-1.76666e-06	-0.96283	-2.30042e-06
-0.96039	-1.06384e-06	-0.96039	-1.7511e-06	-0.96039	-2.28394e-06
-0.95795	-1.05927e-06	-0.95795	-1.7337e-06	-0.95795	-2.27051e-06
-0.95551	-1.05255e-06	-0.95551	-1.71753e-06	-0.95551	-2.25494e-06
-0.95306	-1.04706e-06	-0.95306	-1.70288e-06	-0.95306	-2.24091e-06
-0.95062	-1.04156e-06	-0.95062	-1.68671e-06	-0.95062	-2.22626e-06
-0.94818	-1.03729e-06	-0.94818	-1.67023e-06	-0.94818	-2.21252e-06
-0.94574	-1.03027e-06	-0.94574	-1.65527e-06	-0.94574	-2.19727e-06
-0.9433	-1.02509e-06	-0.9433	-1.64063e-06	-0.9433	-2.18384e-06
-0.94086	-1.01929e-06	-0.94086	-1.62384e-06	-0.94086	-2.1698e-06
-0.93842	-1.01471e-06	-0.93842	-1.61102e-06	-0.93842	-2.15576e-06
-0.93597	-1.00891e-06	-0.93597	-1.59637e-06	-0.93597	-2.14142e-06
-0.93353	-1.00342e-06	-0.93353	-1.58203e-06	-0.93353	-2.12769e-06
-0.93109	-9.97925e-07	-0.93109	-1.56708e-06	-0.93109	-2.11517e-06
-0.92865	-9.93042e-07	-0.92865	-1.55334e-06	-0.92865	-2.10297e-06
-0.92621	-9.87549e-07	-0.92621	-1.53748e-06	-0.92621	-2.08832e-06
-0.92377	-9.82361e-07	-0.92377	-1.52466e-06	-0.92377	-2.07458e-06
-0.92133	-9.77173e-07	-0.92133	-1.51123e-06	-0.92133	-2.06177e-06
-0.91888	-9.71985e-07	-0.91888	-1.49658e-06	-0.91888	-2.04834e-06
-0.91644	-9.66492e-07	-0.91644	-1.48376e-06	-0.91644	-2.03491e-06
-0.914	-9.62524e-07	-0.914	-1.47064e-06	-0.914	-2.02393e-06
-0.91156	-9.57642e-07	-0.91156	-1.45721e-06	-0.91156	-2.00989e-06
-0.90912	-9.53979e-07	-0.90912	-1.44348e-06	-0.90912	-1.99829e-06
-0.90668	-9.49402e-07	-0.90668	-1.43158e-06	-0.90668	-1.98517e-06
-0.90424	-9.44519e-07	-0.90424	-1.4212e-06	-0.90424	-1.97388e-06
-0.90179	-9.38416e-07	-0.90179	-1.40594e-06	-0.90179	-1.96045e-06
-0.89935	-9.32922e-07	-0.89935	-1.39374e-06	-0.89935	-1.94824e-06
-0.89691	-9.2804e-07	-0.89691	-1.38153e-06	-0.89691	-1.93787e-06
-0.89447	-9.21936e-07	-0.89447	-1.36902e-06	-0.89447	-1.92474e-06
-0.89203	-9.17664e-07	-0.89203	-1.35651e-06	-0.89203	-1.91254e-06
-0.88959	-9.11865e-07	-0.88959	-1.34583e-06	-0.88959	-1.90155e-06
-0.88715	-9.07593e-07	-0.88715	-1.33331e-06	-0.88715	-1.88782e-06
-0.8847	-9.021e-07	-0.8847	-1.32172e-06	-0.8847	-1.87592e-06
-0.88226	-8.96912e-07	-0.88226	-1.31073e-06	-0.88226	-1.86493e-06
-0.87982	-8.91724e-07	-0.87982	-1.29791e-06	-0.87982	-1.85547e-06
-0.87738	-8.8562e-07	-0.87738	-1.28571e-06	-0.87738	-1.84204e-06
-0.87494	-8.81348e-07	-0.87494	-1.27625e-06	-0.87494	-1.83258e-06
-0.8725	-8.75549e-07	-0.8725	-1.26465e-06	-0.8725	-1.82129e-06
-0.87006	-8.71277e-07	-0.87006	-1.25366e-06	-0.87006	-1.80847e-06
-0.86761	-8.64868e-07	-0.86761	-1.24176e-06	-0.86761	-1.7984e-06
-0.86517	-8.58765e-07	-0.86517	-1.23169e-06	-0.86517	-1.7865e-06
-0.86273	-8.52356e-07	-0.86273	-1.21948e-06	-0.86273	-1.77551e-06
-0.86029	-8.46863e-07	-0.86029	-1.20758e-06	-0.86029	-1.76544e-06
-0.85785	-8.40759e-07	-0.85785	-1.19904e-06	-0.85785	-1.75262e-06
-0.85541	-8.35876e-07	-0.85541	-1.18774e-06	-0.85541	-1.74225e-06
-0.85297	-8.31604e-07	-0.85297	-1.17645e-06	-0.85297	-1.73218e-06
-0.85052	-8.26721e-07	-0.85052	-1.16486e-06	-0.85052	-1.72211e-06
-0.84808	-8.20007e-07	-0.84808	-1.15509e-06	-0.84808	-1.71112e-06
-0.84564	-8.16345e-07	-0.84564	-1.14349e-06	-0.84564	-1.70074e-06
-0.8432	-8.10852e-07	-0.8432	-1.13342e-06	-0.8432	-1.69067e-06
-0.84076	-8.078e-07	-0.84076	-1.12427e-06	-0.84076	-1.6806e-06
-0.83832	-8.01392e-07	-0.83832	-1.11328e-06	-0.83832	-1.67023e-06
-0.83588	-7.97119e-07	-0.83588	-1.10382e-06	-0.83588	-1.66077e-06
-0.83344	-7.91931e-07	-0.83344	-1.09406e-06	-0.83344	-1.64978e-06
-0.83099	-7.86438e-07	-0.83099	-1.08215e-06	-0.83099	-1.64032e-06
-0.82855	-7.82166e-07	-0.82855	-1.07117e-06	-0.82855	-1.63208e-06
-0.82611	-7.77588e-07	-0.82611	-1.06415e-06	-0.82611	-1.62079e-06
-0.82367	-7.724e-07	-0.82367	-1.05377e-06	-0.82367	-1.61255e-06
-0.82123	-7.66907e-07	-0.82123	-1.04675e-06	-0.82123	-1.60278e-06
-0.81879	-7.62634e-07	-0.81879	-1.03668e-06	-0.81879	-1.59149e-06
-0.81635	-7.56531e-07	-0.81635	-1.02722e-06	-0.81635	-1.58356e-06
-0.8139	-7.51953e-07	-0.8139	-1.01807e-06	-0.8139	-1.57532e-06
-0.81146	-7.4707e-07	-0.81146	-1.008e-06	-0.81146	-1.56525e-06
-0.80902	-7.41882e-07	-0.80902	-9.98535e-07	-0.80902	-1.55548e-06
-0.80658	-7.36389e-07	-0.80658	-9.90295e-07	-0.80658	-1.54755e-06
-0.80414	-7.31201e-07	-0.80414	-9.8114e-07	-0.80414	-1.53778e-06
-0.8017	-7.27234e-07	-0.8017	-9.73511e-07	-0.8017	-1.52985e-06
-0.79926	-7.22046e-07	-0.79926	-9.66187e-07	-0.79926	-1.52039e-06
-0.79681	-7.17163e-07	-0.79681	-9.57642e-07	-0.79681	-1.51245e-06
-0.79437	-7.12585e-07	-0.79437	-9.48486e-07	-0.79437	-1.50299e-06
-0.79193	-7.07703e-07	-0.79193	-9.42078e-07	-0.79193	-1.49445e-06
-0.78949	-7.01904e-07	-0.78949	-9.32007e-07	-0.78949	-1.48285e-06
-0.78705	-6.97937e-07	-0.78705	-9.26514e-07	-0.78705	-1.47552e-06
-0.78461	-6.92749e-07	-0.78461	-9.18274e-07	-0.78461	-1.46729e-06
-0.78217	-6.88782e-07	-0.78217	-9.11865e-07	-0.78217	-1.45966e-06
-0.77972	-6.83594e-07	-0.77972	-9.04541e-07	-0.77972	-1.44958e-06
-0.77728	-6.79321e-07	-0.77728	-8.96301e-07	-0.77728	-1.44287e-06
-0.77484	-6.74744e-07	-0.77484	-8.90198e-07	-0.77484	-1.43402e-06
-0.7724	-6.70166e-07	-0.7724	-8.84094e-07	-0.7724	-1.42548e-06
-0.76996	-6.66504e-07	-0.76996	-8.74634e-07	-0.76996	-1.4151e-06
-0.76752	-6.604e-07	-0.76752	-8.64563e-07	-0.76752	-1.4093e-06
-0.76508	-6.55823e-07	-0.76508	-8.55103e-07	-0.76508	-1.40015e-06
-0.76263	-6.51855e-07	-0.76263	-8.49304e-07	-0.76263	-1.3913e-06
-0.76019	-6.46667e-07	-0.76019	-8.41675e-07	-0.76019	-1.38306e-06
-0.75775	-6.43005e-07	-0.75775	-8.32825e-07	-0.75775	-1.37482e-06
-0.75531	-6.38123e-07	-0.75531	-8.26416e-07	-0.75531	-1.36566e-06
-0.75287	-6.34766e-07	-0.75287	-8.19702e-07	-0.75287	-1.35712e-06
-0.75043	-6.28662e-07	-0.75043	-8.12378e-07	-0.75043	-1.34918e-06
-0.74799	-6.24084e-07	-0.74799	-8.06274e-07	-0.74799	-1.34003e-06
-0.74554	-6.21338e-07	-0.74554	-7.99255e-07	-0.74554	-1.33392e-06
-0.7431	-6.1615e-07	-0.7431	-7.93762e-07	-0.7431	-1.32477e-06
-0.74066	-6.11877e-07	-0.74066	-7.86133e-07	-0.74066	-1.31561e-06
-0.73822	-6.0791e-07	-0.73822	-7.77893e-07	-0.73822	-1.30707e-06
-0.73578	-6.02112e-07	-0.73578	-7.724e-07	-0.73578	-1.29944e-06
-0.73334	-5.97839e-07	-0.73334	-7.66296e-07	-0.73334	-1.29028e-06
-0.7309	-5.94482e-07	-0.7309	-7.59583e-07	-0.7309	-1.28174e-06
-0.72845	-5.9082e-07	-0.72845	-7.55005e-07	-0.72845	-1.2738e-06
-0.72601	-5.85632e-07	-0.72601	-7.47681e-07	-0.72601	-1.26312e-06
-0.72357	-5.79529e-07	-0.72357	-7.40356e-07	-0.72357	-1.2558e-06
-0.72113	-5.77698e-07	-0.72113	-7.34863e-07	-0.72113	-1.24847e-06
-0.71869	-5.72205e-07	-0.71869	-7.29675e-07	-0.71869	-1.23932e-06
-0.71625	-5.67322e-07	-0.71625	-7.23267e-07	-0.71625	-1.23169e-06
-0.71381	-5.6427e-07	-0.71381	-7.19299e-07	-0.71381	-1.22284e-06
-0.71136	-5.59387e-07	-0.71136	-7.11365e-07	-0.71136	-1.21338e-06
-0.70892	-5.54504e-07	-0.70892	-7.06482e-07	-0.70892	-1.20575e-06
-0.70648	-5.51147e-07	-0.70648	-6.99463e-07	-0.70648	-1.1972e-06
-0.70404	-5.45959e-07	-0.70404	-6.9519e-07	-0.70404	-1.1911e-06
-0.7016	-5.41382e-07	-0.7016	-6.89392e-07	-0.7016	-1.18164e-06
-0.69916	-5.3772e-07	-0.69916	-6.82983e-07	-0.69916	-1.17462e-06
-0.69672	-5.33142e-07	-0.69672	-6.76575e-07	-0.69672	-1.16547e-06
-0.69427	-5.2948e-07	-0.69427	-6.71997e-07	-0.69427	-1.15692e-06
-0.69183	-5.25208e-07	-0.69183	-6.67725e-07	-0.69183	-1.14746e-06
-0.68939	-5.2063e-07	-0.68939	-6.62231e-07	-0.68939	-1.14044e-06
-0.68695	-5.15747e-07	-0.68695	-6.55212e-07	-0.68695	-1.1319e-06
-0.68451	-5.12695e-07	-0.68451	-6.49414e-07	-0.68451	-1.12335e-06
-0.68207	-5.07507e-07	-0.68207	-6.43005e-07	-0.68207	-1.11481e-06
-0.67963	-5.03235e-07	-0.67963	-6.39648e-07	-0.67963	-1.10657e-06
-0.67719	-4.98657e-07	-0.67719	-6.33545e-07	-0.67719	-1.09863e-06
-0.67474	-4.95911e-07	-0.67474	-6.27441e-07	-0.67474	-1.09161e-06
-0.6723	-4.89807e-07	-0.6723	-6.23474e-07	-0.6723	-1.08276e-06
-0.66986	-4.8645e-07	-0.66986	-6.20117e-07	-0.66986	-1.07666e-06
-0.66742	-4.82788e-07	-0.66742	-6.14319e-07	-0.66742	-1.06567e-06
-0.66498	-4.77356e-07	-0.66498	-6.09436e-07	-0.66498	-1.05988e-06
-0.66254	-4.73633e-07	-0.66254	-6.03333e-07	-0.66254	-1.05042e-06
-0.6601	-4.68781e-07	-0.6601	-5.97839e-07	-0.6601	-1.04431e-06
-0.65765	-4.64996e-07	-0.65765	-5.91431e-07	-0.65765	-1.03485e-06
-0.65521	-4.61823e-07	-0.65521	-5.86853e-07	-0.65521	-1.02692e-06
-0.65277	-4.57703e-07	-0.65277	-5.8075e-07	-0.65277	-1.01959e-06
-0.65033	-4.53857e-07	-0.65033	-5.75562e-07	-0.65033	-1.01135e-06
-0.64789	-4.50012e-07	-0.64789	-5.70068e-07	-0.64789	-1.00342e-06
-0.64545	-4.46686e-07	-0.64545	-5.66406e-07	-0.64545	-9.97009e-07
-0.64301	-4.42047e-07	-0.64301	-5.59082e-07	-0.64301	-9.87549e-07
-0.64056	-4.38629e-07	-0.64056	-5.5481e-07	-0.64056	-9.8114e-07
-0.63812	-4.34509e-07	-0.63812	-5.49927e-07	-0.63812	-9.73816e-07
-0.63568	-4.29504e-07	-0.63568	-5.41992e-07	-0.63568	-9.65576e-07
-0.63324	-4.2691e-07	-0.63324	-5.3772e-07	-0.63324	-9.57031e-07
-0.6308	-4.22607e-07	-0.6308	-5.31616e-07	-0.6308	-9.50012e-07
-0.62836	-4.18518e-07	-0.62836	-5.25513e-07	-0.62836	-9.40552e-07
-0.62592	-4.14215e-07	-0.62592	-5.2124e-07	-0.62592	-9.33228e-07
-0.62347	-4.10522e-07	-0.62347	-5.15442e-07	-0.62347	-9.26514e-07
-0.62103	-4.08203e-07	-0.62103	-5.10559e-07	-0.62103	-9.17053e-07
-0.61859	-4.0387e-07	-0.61859	-5.04456e-07	-0.61859	-9.10339e-07
-0.61615	-4.00879e-07	-0.61615	-4.96216e-07	-0.61615	-9.01489e-07
-0.61371	-3.97003e-07	-0.61371	-4.91638e-07	-0.61371	-8.92029e-07
-0.61127	-3.91785e-07	-0.61127	-4.85229e-07	-0.61127	-8.84705e-07
-0.60883	-3.88092e-07	-0.60883	-4.79431e-07	-0.60883	-8.7616e-07
-0.60638	-3.83087e-07	-0.60638	-4.74854e-07	-0.60638	-8.68835e-07
-0.60394	-3.79822e-07	-0.60394	-4.68018e-07	-0.60394	-8.60291e-07
-0.6015	-3.76007e-07	-0.6015	-4.61761e-07	-0.6015	-8.52051e-07
-0.59906	-3.72101e-07	-0.59906	-4.56451e-07	-0.59906	-8.45032e-07
-0.59662	-3.66638e-07	-0.59662	-4.5047e-07	-0.59662	-8.36487e-07
-0.59418	-3.63098e-07	-0.59418	-4.43848e-07	-0.59418	-8.28247e-07
-0.59174	-3.5968e-07	-0.59174	-4.37714e-07	-0.59174	-8.20923e-07
-0.58929	-3.54828e-07	-0.58929	-4.31152e-07	-0.58929	-8.13904e-07
-0.58685	-3.51654e-07	-0.58685	-4.27002e-07	-0.58685	-8.05359e-07
-0.58441	-3.47931e-07	-0.58441	-4.20929e-07	-0.58441	-7.9834e-07
-0.58197	-3.44299e-07	-0.58197	-4.15741e-07	-0.58197	-7.91016e-07
-0.57953	-3.4024e-07	-0.57953	-4.10645e-07	-0.57953	-7.83691e-07
-0.57709	-3.36761e-07	-0.57709	-4.0448e-07	-0.57709	-7.74536e-07
-0.57465	-3.32825e-07	-0.57465	-3.98926e-07	-0.57465	-7.68127e-07
-0.5722	-3.29926e-07	-0.5722	-3.94287e-07	-0.5722	-7.58972e-07
-0.56976	-3.24677e-07	-0.56976	-3.88367e-07	-0.56976	-7.52869e-07
-0.56732	-3.22266e-07	-0.56732	-3.82843e-07	-0.56732	-7.43408e-07
-0.56488	-3.18085e-07	-0.56488	-3.76617e-07	-0.56488	-7.37305e-07
-0.56244	-3.1546e-07	-0.56244	-3.70514e-07	-0.56244	-7.2937e-07
-0.56	-3.11371e-07	-0.56	-3.65234e-07	-0.56	-7.21741e-07
-0.55756	-3.07831e-07	-0.55756	-3.58856e-07	-0.55756	-7.13501e-07
-0.55511	-3.03925e-07	-0.55511	-3.53424e-07	-0.55511	-7.04956e-07
-0.55267	-3.00018e-07	-0.55267	-3.48114e-07	-0.55267	-6.99463e-07
-0.55023	-2.966e-07	-0.55023	-3.43689e-07	-0.55023	-6.88477e-07
-0.54779	-2.92816e-07	-0.54779	-3.36639e-07	-0.54779	-6.83594e-07
-0.54535	-2.89154e-07	-0.54535	-3.29987e-07	-0.54535	-6.74438e-07
-0.54291	-2.8537e-07	-0.54291	-3.2489e-07	-0.54291	-6.6864e-07
-0.54047	-2.8183e-07	-0.54047	-3.20068e-07	-0.54047	-6.60706e-07
-0.53802	-2.77863e-07	-0.53802	-3.14789e-07	-0.53802	-6.54297e-07
-0.53558	-2.73682e-07	-0.53558	-3.08167e-07	-0.53558	-6.44531e-07
-0.53314	-2.69775e-07	-0.53314	-3.03589e-07	-0.53314	-6.39648e-07
-0.5307	-2.66876e-07	-0.5307	-2.97607e-07	-0.5307	-6.30798e-07
-0.52826	-2.63977e-07	-0.52826	-2.92084e-07	-0.52826	-6.2439e-07
-0.52582	-2.59308e-07	-0.52582	-2.86499e-07	-0.52582	-6.15845e-07
-0.52338	-2.56866e-07	-0.52338	-2.82135e-07	-0.52338	-6.09436e-07
-0.52094	-2.5174e-07	-0.52094	-2.74506e-07	-0.52094	-6.02112e-07
-0.51849	-2.48047e-07	-0.51849	-2.69775e-07	-0.51849	-5.93872e-07
-0.51605	-2.45239e-07	-0.51605	-2.63733e-07	-0.51605	-5.86853e-07
-0.51361	-2.41882e-07	-0.51361	-2.59888e-07	-0.51361	-5.79834e-07
-0.51117	-2.3761e-07	-0.51117	-2.53174e-07	-0.51117	-5.71594e-07
-0.50873	-2.34833e-07	-0.50873	-2.48505e-07	-0.50873	-5.66406e-07
-0.50629	-2.31354e-07	-0.50629	-2.43073e-07	-0.50629	-5.59387e-07
-0.50385	-2.27997e-07	-0.50385	-2.37274e-07	-0.50385	-5.51147e-07
-0.5014	-2.23816e-07	-0.5014	-2.31354e-07	-0.5014	-5.45654e-07
-0.49896	-2.20184e-07	-0.49896	-2.26196e-07	-0.49896	-5.39551e-07
-0.49652	-2.16858e-07	-0.49652	-2.21252e-07	-0.49652	-5.31006e-07
-0.49408	-2.13348e-07	-0.49408	-2.16248e-07	-0.49408	-5.25208e-07
-0.49164	-2.09442e-07	-0.49164	-2.10846e-07	-0.49164	-5.17273e-07
-0.4892	-2.05902e-07	-0.4892	-2.05353e-07	-0.4892	-5.11169e-07
-0.48676	-2.01935e-07	-0.48676	-1.99432e-07	-0.48676	-5.01709e-07
-0.48431	-1.99036e-07	-0.48431	-1.94916e-07	-0.48431	-4.94995e-07
-0.48187	-1.94397e-07	-0.48187	-1.88995e-07	-0.48187	-4.89807e-07
-0.47943	-1.91498e-07	-0.47943	-1.84235e-07	-0.47943	-4.83398e-07
-0.47699	-1.87195e-07	-0.47699	-1.78741e-07	-0.47699	-4.73328e-07
-0.47455	-1.84906e-07	-0.47455	-1.73859e-07	-0.47455	-4.68445e-07
-0.47211	-1.79199e-07	-0.47211	-1.67664e-07	-0.47211	-4.60266e-07
-0.46967	-1.76941e-07	-0.46967	-1.63269e-07	-0.46967	-4.54163e-07
-0.46722	-1.7337e-07	-0.46722	-1.58356e-07	-0.46722	-4.48212e-07
-0.46478	-1.68884e-07	-0.46478	-1.53473e-07	-0.46478	-4.40552e-07
-0.46234	-1.6507e-07	-0.46234	-1.48438e-07	-0.46234	-4.33655e-07
-0.4599	-1.6275e-07	-0.4599	-1.42853e-07	-0.4599	-4.28009e-07
-0.45746	-1.57593e-07	-0.45746	-1.36658e-07	-0.45746	-4.20898e-07
-0.45502	-1.55273e-07	-0.45502	-1.32721e-07	-0.45502	-4.14398e-07
-0.45258	-1.51031e-07	-0.45258	-1.26648e-07	-0.45258	-4.08417e-07
-0.45013	-1.4798e-07	-0.45013	-1.21643e-07	-0.45013	-4.01825e-07
-0.44769	-1.45111e-07	-0.44769	-1.16394e-07	-0.44769	-3.95111e-07
-0.44525	-1.41541e-07	-0.44525	-1.13159e-07	-0.44525	-3.88489e-07
-0.44281	-1.38275e-07	-0.44281	-1.07361e-07	-0.44281	-3.82996e-07
-0.44037	-1.35437e-07	-0.44037	-1.03058e-07	-0.44037	-3.7677e-07
-0.43793	-1.3205e-07	-0.43793	-9.73206e-08	-0.43793	-3.70728e-07
-0.43549	-1.28876e-07	-0.43549	-9.35059e-08	-0.43549	-3.64288e-07
-0.43304	-1.24542e-07	-0.43304	-8.71582e-08	-0.43304	-3.58002e-07
-0.4306	-1.22101e-07	-0.4306	-8.3252e-08	-0.4306	-3.51501e-07
-0.42816	-1.17401e-07	-0.42816	-7.82166e-08	-0.42816	-3.4552e-07
-0.42572	-1.14197e-07	-0.42572	-7.41272e-08	-0.42572	-3.40851e-07
-0.42328	-1.10626e-07	-0.42328	-6.86035e-08	-0.42328	-3.33618e-07
-0.42084	-1.06934e-07	-0.42084	-6.43616e-08	-0.42084	-3.28705e-07
-0.4184	-1.03973e-07	-0.4184	-5.88989e-08	-0.4184	-3.21503e-07
-0.41595	-1.01593e-07	-0.41595	-5.53589e-08	-0.41595	-3.16498e-07
-0.41351	-9.70459e-08	-0.41351	-4.93164e-08	-0.41351	-3.0957e-07
-0.41107	-9.50623e-08	-0.41107	-4.59595e-08	-0.41107	-3.04932e-07
-0.40863	-9.06677e-08	-0.40863	-3.9978e-08	-0.40863	-2.98706e-07
-0.40619	-8.81653e-08	-0.40619	-3.61633e-08	-0.40619	-2.92786e-07
-0.40375	-8.53271e-08	-0.40375	-3.14331e-08	-0.40375	-2.87476e-07
-0.40131	-8.11157e-08	-0.40131	-2.63977e-08	-0.40131	-2.8299e-07
-0.39886	-7.80029e-08	-0.39886	-2.22168e-08	-0.39886	-2.75757e-07
-0.39642	-7.51648e-08	-0.39642	-1.87683e-08	-0.39642	-2.7124e-07
-0.39398	-7.11975e-08	-0.39398	-1.28784e-08	-0.39398	-2.66388e-07
-0.39154	-6.74438e-08	-0.39154	-8.57544e-09	-0.39154	-2.60864e-07
-0.3891	-6.27747e-08	-0.3891	-4.57764e-09	-0.3891	-2.55768e-07
-0.38666	-5.83496e-08	-0.38666	-1.83105e-09	-0.38666	-2.49573e-07
-0.38422	-5.50842e-08	-0.38422	2.80762e-09	-0.38422	-2.43866e-07
-0.38177	-5.14526e-08	-0.38177	7.26318e-09	-0.38177	-2.37915e-07
-0.37933	-4.62952e-08	-0.37933	1.06201e-08	-0.37933	-2.33459e-07
-0.37689	-4.41284e-08	-0.37689	1.52893e-08	-0.37689	-2.27051e-07
-0.37445	-4.02527e-08	-0.37445	1.99585e-08	-0.37445	-2.21558e-07
-0.37201	-3.85437e-08	-0.37201	2.27051e-08	-0.37201	-2.1933e-07
-0.36957	-3.48511e-08	-0.36957	2.76184e-08	-0.36957	-2.11395e-07
-0.36713	-3.23181e-08	-0.36713	3.00598e-08	-0.36713	-2.07764e-07
-0.36469	-2.93884e-08	-0.36469	3.49426e-08	-0.36469	-2.01935e-07
-0.36224	-2.70386e-08	-0.36224	3.99475e-08	-0.36224	-1.96381e-07
-0.3598	-2.36511e-08	-0.3598	4.50439e-08	-0.3598	-1.92047e-07
-0.35736	-2.07825e-08	-0.35736	4.75464e-08	-0.35736	-1.87286e-07
-0.35492	-1.76392e-08	-0.35492	5.0354e-08	-0.35492	-1.81122e-07
-0.35248	-1.48621e-08	-0.35248	5.52979e-08	-0.35248	-1.77124e-07
-0.35004	-1.18713e-08	-0.35004	5.95398e-08	-0.35004	-1.71783e-07
-0.3476	-9.3689e-09	-0.3476	6.27747e-08	-0.3476	-1.66809e-07
-0.34515	-6.53076e-09	-0.34515	6.67114e-08	-0.34515	-1.61713e-07
-0.34271	-3.44849e-09	-0.34271	6.94275e-08	-0.34271	-1.56799e-07
-0.34027	-3.66211e-10	-0.34027	7.34863e-08	-0.34027	-1.51215e-07
-0.33783	3.05176e-09	-0.33783	7.58667e-08	-0.33783	-1.47522e-07
-0.33539	6.62231e-09	-0.33539	8.13904e-08	-0.33539	-1.41998e-07
-0.33295	8.94165e-09	-0.33295	8.34656e-08	-0.33295	-1.38733e-07
-0.33051	1.22986e-08	-0.33051	8.82263e-08	-0.33051	-1.31927e-07
-0.32806	1.45569e-08	-0.32806	9.06677e-08	-0.32806	-1.28113e-07
-0.32562	1.8158e-08	-0.32562	9.42078e-08	-0.32562	-1.23077e-07
-0.32318	2.19727e-08	-0.32318	9.78699e-08	-0.32318	-1.19568e-07
-0.32074	2.41089e-08	-0.32074	1.01196e-07	-0.32074	-1.12823e-07
-0.3183	2.74353e-08	-0.3183	1.04797e-07	-0.3183	-1.091e-07
-0.31586	3.00598e-08	-0.31586	1.07178e-07	-0.31586	-1.04065e-07
-0.31342	3.34473e-08	-0.31342	1.11359e-07	-0.31342	-1.00708e-07
-0.31097	3.65601e-08	-0.31097	1.15112e-07	-0.31097	-9.4635e-08
-0.30853	4.03137e-08	-0.30853	1.16974e-07	-0.30853	-9.08203e-08
-0.30609	4.3396e-08	-0.30609	1.20514e-07	-0.30609	-8.67004e-08
-0.30365	4.61121e-08	-0.30365	1.23199e-07	-0.30365	-8.21533e-08
-0.30121	5.01099e-08	-0.30121	1.27563e-07	-0.30121	-7.724e-08
-0.29877	5.31006e-08	-0.29877	1.29395e-07	-0.29877	-7.39136e-08
-0.29633	5.68237e-08	-0.29633	1.33453e-07	-0.29633	-6.87561e-08
-0.29388	5.96924e-08	-0.29388	1.34888e-07	-0.29388	-6.5094e-08
-0.29144	6.35071e-08	-0.29144	1.38184e-07	-0.29144	-5.92346e-08
-0.289	6.60095e-08	-0.289	1.41174e-07	-0.289	-5.57556e-08
-0.28656	6.93359e-08	-0.28656	1.44775e-07	-0.28656	-5.19104e-08
-0.28412	7.23572e-08	-0.28412	1.47491e-07	-0.28412	-4.67529e-08
-0.28168	7.66296e-08	-0.28168	1.51367e-07	-0.28168	-4.11072e-08
-0.27924	7.96509e-08	-0.27924	1.53351e-07	-0.27924	-3.75061e-08
-0.27679	8.25806e-08	-0.27679	1.56006e-07	-0.27679	-3.2074e-08
-0.27435	8.59985e-08	-0.27435	1.60126e-07	-0.27435	-2.89917e-08
-0.27191	8.99353e-08	-0.27191	1.61194e-07	-0.27191	-2.45972e-08
-0.26947	9.29871e-08	-0.26947	1.65497e-07	-0.26947	-1.99585e-08
-0.26703	9.50012e-08	-0.26703	1.66534e-07	-0.26703	-1.66931e-08
-0.26459	9.85107e-08	-0.26459	1.698e-07	-0.26459	-1.14746e-08
-0.26215	1.03333e-07	-0.26215	1.73615e-07	-0.26215	-7.1106e-09
-0.2597	1.05927e-07	-0.2597	1.75903e-07	-0.2597	-3.69263e-09
-0.25726	1.08856e-07	-0.25726	1.79535e-07	-0.25726	-4.88281e-10
-0.25482	1.12305e-07	-0.25482	1.80359e-07	-0.25482	2.56348e-09
-0.25238	1.16425e-07	-0.25238	1.8573e-07	-0.25238	7.53784e-09
-0.24994	1.19415e-07	-0.24994	1.87164e-07	-0.24994	1.06201e-08
-0.2475	1.22192e-07	-0.2475	1.88843e-07	-0.2475	1.3031e-08
-0.24506	1.25427e-07	-0.24506	1.92322e-07	-0.24506	1.74561e-08
-0.24261	1.28113e-07	-0.24261	1.95709e-07	-0.24261	2.1637e-08
-0.24017	1.3266e-07	-0.24017	1.97113e-07	-0.24017	2.44141e-08
-0.23773	1.34186e-07	-0.23773	2.00226e-07	-0.23773	2.78625e-08
-0.23529	1.3797e-07	-0.23529	2.02454e-07	-0.23529	3.17993e-08
-0.23285	1.40411e-07	-0.23285	2.04132e-07	-0.23285	3.60413e-08
-0.23041	1.4325e-07	-0.23041	2.06635e-07	-0.23041	3.9978e-08
-0.22797	1.4624e-07	-0.22797	2.09656e-07	-0.22797	4.42505e-08
-0.22552	1.49109e-07	-0.22552	2.11334e-07	-0.22552	4.75159e-08
-0.22308	1.521e-07	-0.22308	2.15363e-07	-0.22308	5.19409e-08
-0.22064	1.56097e-07	-0.22064	2.16644e-07	-0.22064	5.47485e-08
-0.2182	1.58295e-07	-0.2182	2.20428e-07	-0.2182	5.95093e-08
-0.21576	1.6214e-07	-0.21576	2.21497e-07	-0.21576	6.32019e-08
-0.21332	1.64337e-07	-0.21332	2.25403e-07	-0.21332	6.6864e-08
-0.21088	1.67908e-07	-0.21088	2.26746e-07	-0.21088	6.99463e-08
-0.20844	1.70807e-07	-0.20844	2.28485e-07	-0.20844	7.2998e-08
-0.20599	1.73553e-07	-0.20599	2.31598e-07	-0.20599	7.7179e-08
-0.20355	1.78497e-07	-0.20355	2.34344e-07	-0.20355	7.98645e-08
-0.20111	1.79749e-07	-0.20111	2.36572e-07	-0.20111	8.36792e-08
-0.19867	1.83105e-07	-0.19867	2.39502e-07	-0.19867	8.79211e-08
-0.19623	1.85181e-07	-0.19623	2.40784e-07	-0.19623	9.0271e-08
-0.19379	1.88538e-07	-0.19379	2.43378e-07	-0.19379	9.43604e-08
-0.19135	1.92261e-07	-0.19135	2.46307e-07	-0.19135	9.73511e-08
-0.1889	1.94122e-07	-0.1889	2.47864e-07	-0.1889	1.01318e-07
-0.18646	1.97357e-07	-0.18646	2.50153e-07	-0.18646	1.04462e-07
-0.18402	2.00562e-07	-0.18402	2.5415e-07	-0.18402	1.08032e-07
-0.18158	2.03217e-07	-0.18158	2.55859e-07	-0.18158	1.10992e-07
-0.17914	2.0694e-07	-0.17914	2.58392e-07	-0.17914	1.15631e-07
-0.1767	2.09106e-07	-0.1767	2.60956e-07	-0.1767	1.18622e-07
-0.17426	2.13196e-07	-0.17426	2.62573e-07	-0.17426	1.23352e-07
-0.17181	2.16064e-07	-0.17181	2.64893e-07	-0.17181	1.2558e-07
-0.16937	2.1875e-07	-0.16937	2.66815e-07	-0.16937	1.29456e-07
-0.16693	2.21069e-07	-0.16693	2.69653e-07	-0.16693	1.33392e-07
-0.16449	2.25403e-07	-0.16449	2.72308e-07	-0.16449	1.36444e-07
-0.16205	2.27112e-07	-0.16205	2.74048e-07	-0.16205	1.39465e-07
-0.15961	2.30957e-07	-0.15961	2.76825e-07	-0.15961	1.44928e-07
-0.15717	2.33582e-07	-0.15717	2.78595e-07	-0.15717	1.474e-07
-0.15472	2.36694e-07	-0.15472	2.80334e-07	-0.15472	1.50116e-07
-0.15228	2.40356e-07	-0.15228	2.82288e-07	-0.15228	1.54114e-07
-0.14984	2.43347e-07	-0.14984	2.85706e-07	-0.14984	1.58386e-07
-0.1474	2.4588e-07	-0.1474	2.87628e-07	-0.1474	1.6217e-07
-0.14496	2.49359e-07	-0.14496	2.90253e-07	-0.14496	1.65894e-07
-0.14252	2.5235e-07	-0.14252	2.93396e-07	-0.14252	1.69037e-07
-0.14008	2.55981e-07	-0.14008	2.95441e-07	-0.14008	1.74438e-07
-0.13763	2.5885e-07	-0.13763	2.97607e-07	-0.13763	1.75354e-07
-0.13519	2.62024e-07	-0.13519	3.00568e-07	-0.13519	1.79718e-07
-0.13275	2.65869e-07	-0.13275	3.0249e-07	-0.13275	1.82861e-07
-0.13031	2.68066e-07	-0.13031	3.02856e-07	-0.13031	1.86157e-07
-0.12787	2.7063e-07	-0.12787	3.06549e-07	-0.12787	1.90613e-07
-0.12543	2.73773e-07	-0.12543	3.09021e-07	-0.12543	1.9458e-07
-0.12299	2.76611e-07	-0.12299	3.10577e-07	-0.12299	1.97266e-07
-0.12054	2.80487e-07	-0.12054	3.14087e-07	-0.12054	2.00714e-07
-0.1181	2.83386e-07	-0.1181	3.16345e-07	-0.1181	2.04865e-07
-0.11566	2.86133e-07	-0.11566	3.19916e-07	-0.11566	2.08191e-07
-0.11322	2.89978e-07	-0.11322	3.21045e-07	-0.11322	2.11151e-07
-0.11078	2.92206e-07	-0.11078	3.25256e-07	-0.11078	2.15363e-07
-0.10834	2.95319e-07	-0.10834	3.26782e-07	-0.10834	2.20398e-07
-0.1059	2.99194e-07	-0.1059	3.29987e-07	-0.1059	2.24182e-07
-0.10345	3.02216e-07	-0.10345	3.3194e-07	-0.10345	2.26196e-07
-0.10101	3.05603e-07	-0.10101	3.35358e-07	-0.10101	2.3111e-07
-0.09857	3.08441e-07	-0.09857	3.38501e-07	-0.09857	2.34589e-07
-0.09613	3.12134e-07	-0.09613	3.42102e-07	-0.09613	2.38434e-07
-0.09369	3.14362e-07	-0.09369	3.42896e-07	-0.09369	2.42126e-07
-0.09125	3.1781e-07	-0.09125	3.4726e-07	-0.09125	2.44995e-07
-0.08881	3.2132e-07	-0.08881	3.49274e-07	-0.08881	2.49207e-07
-0.08636	3.25134e-07	-0.08636	3.52539e-07	-0.08636	2.52716e-07
-0.08392	3.27301e-07	-0.08392	3.55194e-07	-0.08392	2.5647e-07
-0.08148	3.30536e-07	-0.08148	3.59039e-07	-0.08148	2.60925e-07
-0.07904	3.3313e-07	-0.07904	3.61969e-07	-0.07904	2.64648e-07
-0.0766	3.37097e-07	-0.0766	3.64838e-07	-0.0766	2.67578e-07
-0.07416	3.40363e-07	-0.07416	3.67737e-07	-0.07416	2.71637e-07
-0.07172	3.42621e-07	-0.07172	3.71155e-07	-0.07172	2.75299e-07
-0.06927	3.46283e-07	-0.06927	3.73657e-07	-0.06927	2.78687e-07
-0.06683	3.49701e-07	-0.06683	3.76495e-07	-0.06683	2.83325e-07
-0.06439	3.52081e-07	-0.06439	3.79364e-07	-0.06439	2.86346e-07
-0.06195	3.54462e-07	-0.06195	3.83606e-07	-0.06195	2.91473e-07
-0.05951	3.57147e-07	-0.05951	3.86078e-07	-0.05951	2.93549e-07
-0.05707	3.60443e-07	-0.05707	3.89465e-07	-0.05707	2.98431e-07
-0.05463	3.63098e-07	-0.05463	3.92548e-07	-0.05463	3.00995e-07
-0.05219	3.65662e-07	-0.05219	3.96362e-07	-0.05219	3.04718e-07
-0.04974	3.68866e-07	-0.04974	3.99719e-07	-0.04974	3.08899e-07
-0.0473	3.71552e-07	-0.0473	4.039e-07	-0.0473	3.125e-07
-0.04486	3.74573e-07	-0.04486	4.06708e-07	-0.04486	3.15704e-07
-0.04242	3.77136e-07	-0.04242	4.09851e-07	-0.04242	3.19489e-07
-0.03998	3.79791e-07	-0.03998	4.14124e-07	-0.03998	3.23608e-07
-0.03754	3.83087e-07	-0.03754	4.18945e-07	-0.03754	3.27515e-07
-0.0351	3.86566e-07	-0.0351	4.21417e-07	-0.0351	3.32092e-07
-0.03265	3.90564e-07	-0.03265	4.24683e-07	-0.03265	3.35327e-07
-0.03021	3.94135e-07	-0.03021	4.28467e-07	-0.03021	3.39417e-07
-0.02777	3.98071e-07	-0.02777	4.33105e-07	-0.02777	3.44238e-07
-0.02533	4.01794e-07	-0.02533	4.36005e-07	-0.02533	3.47565e-07
-0.02289	4.07898e-07	-0.02289	4.4043e-07	-0.02289	3.51044e-07
-0.02045	4.11011e-07	-0.02045	4.43573e-07	-0.02045	3.56415e-07
-0.01801	4.15192e-07	-0.01801	4.4809e-07	-0.01801	3.60535e-07
-0.01556	4.19037e-07	-0.01556	4.51752e-07	-0.01556	3.64929e-07
-0.01312	4.24194e-07	-0.01312	4.55322e-07	-0.01312	3.67859e-07
-0.01068	4.27948e-07	-0.01068	4.59778e-07	-0.01068	3.7262e-07
-0.00824	4.31915e-07	-0.00824	4.65485e-07	-0.00824	3.77747e-07
-0.0058	4.36066e-07	-0.0058	4.68811e-07	-0.0058	3.8092e-07
-0.00336	4.40765e-07	-0.00336	4.73602e-07	-0.00336	3.86749e-07
-0.000915527	4.4397e-07	-0.000915527	4.7821e-07	-0.000915527	3.89618e-07
0.00153	4.48608e-07	0.00153	4.82361e-07	0.00153	3.95477e-07
0.00397	4.52515e-07	0.00397	4.87579e-07	0.00397	3.99231e-07
0.00641	4.57825e-07	0.00641	4.93042e-07	0.00641	4.03381e-07
0.00885	4.63135e-07	0.00885	4.96155e-07	0.00885	4.08661e-07
0.01129	4.67407e-07	0.01129	5.01892e-07	0.01129	4.14032e-07
0.01373	4.71405e-07	0.01373	5.05402e-07	0.01373	4.16656e-07
0.01617	4.77051e-07	0.01617	5.10406e-07	0.01617	4.22424e-07
0.01862	4.81354e-07	0.01862	5.14801e-07	0.01862	4.28009e-07
0.02106	4.87061e-07	0.02106	5.20172e-07	0.02106	4.3219e-07
0.0235	4.91302e-07	0.0235	5.24384e-07	0.0235	4.36157e-07
0.02594	4.96338e-07	0.02594	5.30334e-07	0.02594	4.41345e-07
0.02838	5.01099e-07	0.02838	5.35156e-07	0.02838	4.45892e-07
0.03082	5.05981e-07	0.03082	5.41046e-07	0.03082	4.51599e-07
0.03326	5.09918e-07	0.03326	5.44128e-07	0.03326	4.56238e-07
0.03571	5.15289e-07	0.03571	5.51056e-07	0.03571	4.62128e-07
0.03815	5.18738e-07	0.03815	5.56091e-07	0.03815	4.67865e-07
0.04059	5.22522e-07	0.04059	5.61829e-07	0.04059	4.72534e-07
0.04303	5.26642e-07	0.04303	5.67291e-07	0.04303	4.77814e-07
0.04547	5.30457e-07	0.04547	5.7196e-07	0.04547	4.8233e-07
0.04791	5.34058e-07	0.04791	5.78156e-07	0.04791	4.89136e-07
0.05035	5.37903e-07	0.05035	5.8548e-07	0.05035	4.94171e-07
0.0528	5.42084e-07	0.0528	5.91431e-07	0.0528	4.9942e-07
0.05524	5.46112e-07	0.05524	5.96588e-07	0.05524	5.0592e-07
0.05768	5.49591e-07	0.05768	6.02356e-07	0.05768	5.0946e-07
0.06012	5.53467e-07	0.06012	6.0791e-07	0.06012	5.16907e-07
0.06256	5.57983e-07	0.06256	6.13403e-07	0.06256	5.21118e-07
0.065	5.62775e-07	0.065	6.19507e-07	0.065	5.29114e-07
0.06744	5.66681e-07	0.06744	6.27747e-07	0.06744	5.33234e-07
0.06989	5.71167e-07	0.06989	6.33545e-07	0.06989	5.40192e-07
0.07233	5.76019e-07	0.07233	6.40259e-07	0.07233	5.45776e-07
0.07477	5.81268e-07	0.07477	6.47888e-07	0.07477	5.52063e-07
0.07721	5.85632e-07	0.07721	6.53381e-07	0.07721	5.57739e-07
0.07965	5.90851e-07	0.07965	6.60706e-07	0.07965	5.64423e-07
0.08209	5.96863e-07	0.08209	6.67725e-07	0.08209	5.70862e-07
0.08453	6.01654e-07	0.08453	6.75659e-07	0.08453	5.76294e-07
0.08698	6.06384e-07	0.08698	6.82068e-07	0.08698	5.83008e-07
0.08942	6.12793e-07	0.08942	6.90613e-07	0.08942	5.90332e-07
0.09186	6.18286e-07	0.09186	6.97021e-07	0.09186	5.96161e-07
0.0943	6.24695e-07	0.0943	7.06787e-07	0.0943	6.03027e-07
0.09674	6.28967e-07	0.09674	7.13196e-07	0.09674	6.08215e-07
0.09918	6.35681e-07	0.09918	7.22046e-07	0.09918	6.15845e-07
0.10162	6.41479e-07	0.10162	7.2876e-07	0.10162	6.22559e-07
0.10406	6.48193e-07	0.10406	7.37e-07	0.10406	6.30188e-07
0.10651	6.53687e-07	0.10651	7.44324e-07	0.10651	6.36902e-07
0.10895	6.5918e-07	0.10895	7.547e-07	0.10895	6.44531e-07
0.11139	6.65588e-07	0.11139	7.62329e-07	0.11139	6.52466e-07
0.11383	6.71387e-07	0.11383	7.71179e-07	0.11383	6.5979e-07
0.11627	6.78406e-07	0.11627	7.79724e-07	0.11627	6.66809e-07
0.11871	6.84509e-07	0.11871	7.88574e-07	0.11871	6.75659e-07
0.12115	6.89087e-07	0.12115	7.97119e-07	0.12115	6.84204e-07
0.1236	6.94885e-07	0.1236	8.06274e-07	0.1236	6.91833e-07
0.12604	7.00989e-07	0.12604	8.15125e-07	0.12604	6.97632e-07
0.12848	7.08008e-07	0.12848	8.255e-07	0.12848	7.08618e-07
0.13092	7.12585e-07	0.13092	8.34961e-07	0.13092	7.13501e-07
0.13336	7.18994e-07	0.13336	8.44421e-07	0.13336	7.23572e-07
0.1358	7.25098e-07	0.1358	8.53271e-07	0.1358	7.30896e-07
0.13824	7.32117e-07	0.13824	8.64258e-07	0.13824	7.41577e-07
0.14069	7.39136e-07	0.14069	8.73718e-07	0.14069	7.48901e-07
0.14313	7.4585e-07	0.14313	8.83789e-07	0.14313	7.57141e-07
0.14557	7.50427e-07	0.14557	8.94165e-07	0.14557	7.65686e-07
0.14801	7.58057e-07	0.14801	9.04846e-07	0.14801	7.76978e-07
0.15045	7.6416e-07	0.15045	9.14001e-07	0.15045	7.84607e-07
0.15289	7.71484e-07	0.15289	9.24988e-07	0.15289	7.92847e-07
0.15533	7.78198e-07	0.15533	9.35364e-07	0.15533	8.03528e-07
0.15778	7.85522e-07	0.15778	9.47266e-07	0.15778	8.11157e-07
0.16022	7.91626e-07	0.16022	9.57031e-07	0.16022	8.21838e-07
0.16266	7.98645e-07	0.16266	9.68628e-07	0.16266	8.3252e-07
0.1651	8.06274e-07	0.1651	9.8114e-07	0.1651	8.41064e-07
0.16754	8.11768e-07	0.16754	9.91516e-07	0.16754	8.52661e-07
0.16998	8.19397e-07	0.16998	1.00311e-06	0.16998	8.62732e-07
0.17242	8.26416e-07	0.17242	1.01624e-06	0.17242	8.7616e-07
0.17487	8.32214e-07	0.17487	1.02783e-06	0.17487	8.83789e-07
0.17731	8.39844e-07	0.17731	1.03943e-06	0.17731	8.95081e-07
0.17975	8.45947e-07	0.17975	1.05255e-06	0.17975	9.06677e-07
0.18219	8.5144e-07	0.18219	1.06445e-06	0.18219	9.17358e-07
0.18463	8.58765e-07	0.18463	1.07635e-06	0.18463	9.2926e-07
0.18707	8.66699e-07	0.18707	1.08887e-06	0.18707	9.40552e-07
0.18951	8.74329e-07	0.18951	1.1026e-06	0.18951	9.52454e-07
0.19196	8.80432e-07	0.19196	1.11572e-06	0.19196	9.6405e-07
0.1944	8.87756e-07	0.1944	1.12823e-06	0.1944	9.75037e-07
0.19684	8.96606e-07	0.19684	1.14136e-06	0.19684	9.88464e-07
0.19928	9.0271e-07	0.19928	1.15417e-06	0.19928	1.00067e-06
0.20172	9.11255e-07	0.20172	1.16943e-06	0.20172	1.01288e-06
0.20416	9.18884e-07	0.20416	1.18317e-06	0.20416	1.0257e-06
0.2066	9.26514e-07	0.2066	1.19873e-06	0.2066	1.03943e-06
0.20905	9.34143e-07	0.20905	1.21246e-06	0.20905	1.0498e-06
0.21149	9.42993e-07	0.21149	1.22559e-06	0.21149	1.06506e-06
0.21393	9.50317e-07	0.21393	1.24023e-06	0.21393	1.07849e-06
0.21637	9.58252e-07	0.21637	1.2558e-06	0.21637	1.09283e-06
0.21881	9.65576e-07	0.21881	1.26984e-06	0.21881	1.10565e-06
0.22125	9.74426e-07	0.22125	1.2851e-06	0.22125	1.11786e-06
0.22369	9.82971e-07	0.22369	1.30005e-06	0.22369	1.13403e-06
0.22614	9.90295e-07	0.22614	1.31622e-06	0.22614	1.14868e-06
0.22858	9.97925e-07	0.22858	1.32996e-06	0.22858	1.16211e-06
0.23102	1.00677e-06	0.23102	1.34735e-06	0.23102	1.17706e-06
0.23346	1.01349e-06	0.23346	1.36414e-06	0.23346	1.19141e-06
0.2359	1.02203e-06	0.2359	1.37939e-06	0.2359	1.20667e-06
0.23834	1.03027e-06	0.23834	1.39648e-06	0.23834	1.21887e-06
0.24078	1.03729e-06	0.24078	1.41205e-06	0.24078	1.23505e-06
0.24323	1.04492e-06	0.24323	1.43005e-06	0.24323	1.24878e-06
0.24567	1.05286e-06	0.24567	1.44501e-06	0.24567	1.2674e-06
0.24811	1.05835e-06	0.24811	1.46301e-06	0.24811	1.28204e-06
0.25055	1.0672e-06	0.25055	1.47949e-06	0.25055	1.29822e-06
0.25299	1.0733e-06	0.25299	1.49628e-06	0.25299	1.31195e-06
0.25543	1.08154e-06	0.25543	1.5155e-06	0.25543	1.33057e-06
0.25787	1.08887e-06	0.25787	1.53107e-06	0.25787	1.34552e-06
0.26031	1.09772e-06	0.26031	1.54999e-06	0.26031	1.36139e-06
0.26276	1.10596e-06	0.26276	1.5686e-06	0.26276	1.37817e-06
0.2652	1.1142e-06	0.2652	1.586e-06	0.2652	1.39679e-06
0.26764	1.12305e-06	0.26764	1.60461e-06	0.26764	1.41174e-06
0.27008	1.13312e-06	0.27008	1.62323e-06	0.27008	1.43036e-06
0.27252	1.14288e-06	0.27252	1.64154e-06	0.27252	1.44531e-06
0.27496	1.15112e-06	0.27496	1.66138e-06	0.27496	1.46332e-06
0.2774	1.1618e-06	0.2774	1.67938e-06	0.2774	1.48102e-06
0.27985	1.16882e-06	0.27985	1.69739e-06	0.27985	1.49841e-06
0.28229	1.17706e-06	0.28229	1.71722e-06	0.28229	1.51489e-06
0.28473	1.18347e-06	0.28473	1.73859e-06	0.28473	1.53473e-06
0.28717	1.19049e-06	0.28717	1.75537e-06	0.28717	1.55182e-06
0.28961	1.19751e-06	0.28961	1.77673e-06	0.28961	1.57074e-06
0.29205	1.20514e-06	0.29205	1.79535e-06	0.29205	1.58844e-06
0.29449	1.21246e-06	0.29449	1.81641e-06	0.29449	1.60706e-06
0.29694	1.21826e-06	0.29694	1.83533e-06	0.29694	1.62445e-06
0.29938	1.22833e-06	0.29938	1.85608e-06	0.29938	1.64307e-06
0.30182	1.23657e-06	0.30182	1.87592e-06	0.30182	1.6626e-06
0.30426	1.24695e-06	0.30426	1.89667e-06	0.30426	1.6806e-06
0.3067	1.25549e-06	0.3067	1.9165e-06	0.3067	1.69861e-06
0.30914	1.26648e-06	0.30914	1.93726e-06	0.30914	1.71936e-06
0.31158	1.27655e-06	0.31158	1.9574e-06	0.31158	1.73676e-06
0.31403	1.28571e-06	0.31403	1.97998e-06	0.31403	1.75598e-06
0.31647	1.2973e-06	0.31647	2.00104e-06	0.31647	1.77338e-06
0.31891	1.30524e-06	0.31891	2.02057e-06	0.31891	1.79413e-06
0.32135	1.31531e-06	0.32135	2.0401e-06	0.32135	1.81549e-06
0.32379	1.32599e-06	0.32379	2.06238e-06	0.32379	1.83533e-06
0.32623	1.33545e-06	0.32623	2.08374e-06	0.32623	1.85364e-06
0.32867	1.34613e-06	0.32867	2.10571e-06	0.32867	1.87317e-06
0.33112	1.35437e-06	0.33112	2.12524e-06	0.33112	1.89087e-06
0.33356	1.36536e-06	0.33356	2.1463e-06	0.33356	1.91193e-06
0.336	1.37451e-06	0.336	2.16858e-06	0.336	1.93268e-06
0.33844	1.38306e-06	0.33844	2.18842e-06	0.33844	1.95129e-06
0.34088	1.39374e-06	0.34088	2.20978e-06	0.34088	1.97388e-06
0.34332	1.40442e-06	0.34332	2.23267e-06	0.34332	1.99219e-06
0.34576	1.41266e-06	0.34576	2.25189e-06	0.34576	2.01202e-06
0.34821	1.42365e-06	0.34821	2.27539e-06	0.34821	2.03247e-06
0.35065	1.43097e-06	0.35065	2.29492e-06	0.35065	2.05109e-06
0.35309	1.44073e-06	0.35309	2.31415e-06	0.35309	2.07092e-06
0.35553	1.44928e-06	0.35553	2.33551e-06	0.35553	2.08954e-06
0.35797	1.45905e-06	0.35797	2.35535e-06	0.35797	2.1109e-06
0.36041	1.46667e-06	0.36041	2.37732e-06	0.36041	2.13074e-06
0.36285	1.47675e-06	0.36285	2.39899e-06	0.36285	2.1524e-06
0.3653	1.48712e-06	0.3653	2.41943e-06	0.3653	2.17224e-06
0.36774	1.49689e-06	0.36774	2.44141e-06	0.36774	2.19086e-06
0.37018	1.50696e-06	0.37018	2.46002e-06	0.37018	2.21069e-06
0.37262	1.51733e-06	0.37262	2.47955e-06	0.37262	2.23236e-06
0.37506	1.52649e-06	0.37506	2.49969e-06	0.37506	2.25037e-06
0.3775	1.53778e-06	0.3775	2.51862e-06	0.3775	2.27173e-06
0.37994	1.54816e-06	0.37994	2.53876e-06	0.37994	2.29065e-06
0.38239	1.55792e-06	0.38239	2.5592e-06	0.38239	2.31354e-06
0.38483	1.56891e-06	0.38483	2.57629e-06	0.38483	2.33063e-06
0.38727	1.57745e-06	0.38727	2.59888e-06	0.38727	2.35291e-06
0.38971	1.58875e-06	0.38971	2.61566e-06	0.38971	2.3703e-06
0.39215	1.59637e-06	0.39215	2.63489e-06	0.39215	2.39227e-06
0.39459	1.60706e-06	0.39459	2.65289e-06	0.39459	2.41058e-06
0.39703	1.61682e-06	0.39703	2.6709e-06	0.39703	2.43011e-06
0.39948	1.62567e-06	0.39948	2.6889e-06	0.39948	2.44995e-06
0.40192	1.63666e-06	0.40192	2.70721e-06	0.40192	2.46918e-06
0.40436	1.6449e-06	0.40436	2.72369e-06	0.40436	2.48901e-06
0.4068	1.65466e-06	0.4068	2.74078e-06	0.4068	2.51007e-06
0.40924	1.6626e-06	0.40924	2.75604e-06	0.40924	2.52747e-06
0.41168	1.67084e-06	0.41168	2.77374e-06	0.41168	2.54913e-06
0.41412	1.67786e-06	0.41412	2.78809e-06	0.41412	2.56561e-06
0.41656	1.6864e-06	0.41656	2.80243e-06	0.41656	2.58575e-06
0.41901	1.69434e-06	0.41901	2.8183e-06	0.41901	2.60406e-06
0.42145	1.7038e-06	0.42145	2.83386e-06	0.42145	2.62421e-06
0.42389	1.71112e-06	0.42389	2.84607e-06	0.42389	2.64008e-06
0.42633	1.72058e-06	0.42633	2.8598e-06	0.42633	2.66113e-06
0.42877	1.72791e-06	0.42877	2.87109e-06	0.42877	2.67792e-06
0.43121	1.73553e-06	0.43121	2.88422e-06	0.43121	2.69806e-06
0.43365	1.74469e-06	0.43365	2.89612e-06	0.43365	2.71484e-06
0.4361	1.75262e-06	0.4361	2.90649e-06	0.4361	2.73254e-06
0.43854	1.763e-06	0.43854	2.91962e-06	0.43854	2.75055e-06
0.44098	1.77155e-06	0.44098	2.92969e-06	0.44098	2.76947e-06
0.44342	1.77795e-06	0.44342	2.9364e-06	0.44342	2.78564e-06
0.44586	1.78772e-06	0.44586	2.94861e-06	0.44586	2.80304e-06
0.4483	1.79535e-06	0.4483	2.95563e-06	0.4483	2.81952e-06
0.45074	1.80389e-06	0.45074	2.96661e-06	0.45074	2.83813e-06
0.45319	1.80908e-06	0.45319	2.9718e-06	0.45319	2.85248e-06
0.45563	1.81885e-06	0.45563	2.97821e-06	0.45563	2.86804e-06
0.45807	1.82556e-06	0.45807	2.98523e-06	0.45807	2.88605e-06
0.46051	1.8335e-06	0.46051	2.99316e-06	0.46051	2.90375e-06
0.46295	1.8396e-06	0.46295	2.99866e-06	0.46295	2.91687e-06
0.46539	1.84692e-06	0.46539	3.00537e-06	0.46539	2.93365e-06
0.46783	1.85272e-06	0.46783	3.0072e-06	0.46783	2.9483e-06
0.47028	1.86096e-06	0.47028	3.01239e-06	0.47028	2.96204e-06
0.47272	1.86798e-06	0.47272	3.01575e-06	0.47272	2.97516e-06
0.47516	1.87561e-06	0.47516	3.02002e-06	0.47516	2.99103e-06
0.4776	1.88232e-06	0.4776	3.02124e-06	0.4776	3.00446e-06
0.48004	1.88782e-06	0.48004	3.02521e-06	0.48004	3.01788e-06
0.48248	1.89514e-06	0.48248	3.02704e-06	0.48248	3.02979e-06
0.48492	1.90247e-06	0.48492	3.02673e-06	0.48492	3.04291e-06
0.48737	1.90735e-06	0.48737	3.02765e-06	0.48737	3.05481e-06
0.48981	1.91467e-06	0.48981	3.0304e-06	0.48981	3.06824e-06
0.49225	1.91833e-06	0.49225	3.02765e-06	0.49225	3.07983e-06
0.49469	1.92505e-06	0.49469	3.02551e-06	0.49469	3.0899e-06
0.49713	1.93085e-06	0.49713	3.0249e-06	0.49713	3.10028e-06
0.49957	1.93573e-06	0.49957	3.0246e-06	0.49957	3.11432e-06
0.50201	1.94092e-06	0.50201	3.02094e-06	0.50201	3.12256e-06
0.50446	1.94763e-06	0.50446	3.01971e-06	0.50446	3.1308e-06
0.5069	1.95313e-06	0.5069	3.01544e-06	0.5069	3.13873e-06
0.50934	1.95831e-06	0.50934	3.01331e-06	0.50934	3.14972e-06
0.51178	1.9632e-06	0.51178	3.00751e-06	0.51178	3.15582e-06
0.51422	1.96777e-06	0.51422	3.00507e-06	0.51422	3.16315e-06
0.51666	1.97479e-06	0.51666	2.99835e-06	0.51666	3.17047e-06
0.5191	1.97906e-06	0.5191	2.9953e-06	0.5191	3.17688e-06
0.52155	1.98303e-06	0.52155	2.98859e-06	0.52155	3.18207e-06
0.52399	1.98822e-06	0.52399	2.98279e-06	0.52399	3.18909e-06
0.52643	1.99158e-06	0.52643	2.97546e-06	0.52643	3.19244e-06
0.52887	1.99524e-06	0.52887	2.96936e-06	0.52887	3.19733e-06
0.53131	1.99768e-06	0.53131	2.96204e-06	0.53131	3.20007e-06
0.53375	2.00195e-06	0.53375	2.9538e-06	0.53375	3.20313e-06
0.53619	2.00531e-06	0.53619	2.94586e-06	0.53619	3.20648e-06
0.53864	2.00928e-06	0.53864	2.93793e-06	0.53864	3.21014e-06
0.54108	2.01202e-06	0.54108	2.92938e-06	0.54108	3.21045e-06
0.54352	2.0166e-06	0.54352	2.92236e-06	0.54352	3.21289e-06
0.54596	2.01965e-06	0.54596	2.91077e-06	0.54596	3.21228e-06
0.5484	2.02271e-06	0.5484	2.90222e-06	0.5484	3.21259e-06
0.55084	2.02454e-06	0.55084	2.89307e-06	0.55084	3.21228e-06
0.55328	2.02545e-06	0.55328	2.88391e-06	0.55328	3.21075e-06
0.55573	2.02728e-06	0.55573	2.87292e-06	0.55573	3.20892e-06
0.55817	2.03003e-06	0.55817	2.86346e-06	0.55817	3.20831e-06
0.56061	2.02972e-06	0.56061	2.85217e-06	0.56061	3.20648e-06
0.56305	2.03217e-06	0.56305	2.84363e-06	0.56305	3.20343e-06
0.56549	2.034e-06	0.56549	2.83356e-06	0.56549	3.19855e-06
0.56793	2.03461e-06	0.56793	2.82257e-06	0.56793	3.19672e-06
0.57037	2.03522e-06	0.57037	2.81281e-06	0.57037	3.1897e-06
0.57281	2.03552e-06	0.57281	2.80304e-06	0.57281	3.18634e-06
0.57526	2.03705e-06	0.57526	2.79236e-06	0.57526	3.18207e-06
0.5777	2.03766e-06	0.5777	2.78168e-06	0.5777	3.17719e-06
0.58014	2.03705e-06	0.58014	2.77252e-06	0.58014	3.16895e-06
0.58258	2.03827e-06	0.58258	2.76276e-06	0.58258	3.16467e-06
0.58502	2.03796e-06	0.58502	2.75238e-06	0.58502	3.15704e-06
0.58746	2.03705e-06	0.58746	2.74475e-06	0.58746	3.15033e-06
0.5899	2.03735e-06	0.5899	2.73407e-06	0.5899	3.14301e-06
0.59235	2.03674e-06	0.59235	2.72552e-06	0.59235	3.13477e-06
0.59479	2.03583e-06	0.59479	2.71729e-06	0.59479	3.12805e-06
0.59723	2.03461e-06	0.59723	2.70905e-06	0.59723	3.12012e-06
0.59967	2.03217e-06	0.59967	2.70081e-06	0.59967	3.11096e-06
0.60211	2.03003e-06	0.60211	2.69257e-06	0.60211	3.10303e-06
0.60455	2.03003e-06	0.60455	2.68463e-06	0.60455	3.09418e-06
0.60699	2.0285e-06	0.60699	2.67853e-06	0.60699	3.08502e-06
0.60944	2.02484e-06	0.60944	2.66846e-06	0.60944	3.07343e-06
0.61188	2.0224e-06	0.61188	2.66327e-06	0.61188	3.06244e-06
0.61432	2.02057e-06	0.61432	2.65686e-06	0.61432	3.05267e-06
0.61676	2.0166e-06	0.61676	2.65259e-06	0.61676	3.0426e-06
0.6192	2.01385e-06	0.6192	2.64526e-06	0.6192	3.03162e-06
0.62164	2.01019e-06	0.62164	2.64099e-06	0.62164	3.02124e-06
0.62408	2.00714e-06	0.62408	2.63489e-06	0.62408	3.00903e-06
0.62653	2.00226e-06	0.62653	2.63062e-06	0.62653	2.99591e-06
0.62897	1.9989e-06	0.62897	2.62421e-06	0.62897	2.98431e-06
0.63141	1.99768e-06	0.63141	2.61932e-06	0.63141	2.97333e-06
0.63385	1.99341e-06	0.63385	2.61383e-06	0.63385	2.96143e-06
0.63629	1.98944e-06	0.63629	2.61047e-06	0.63629	2.9483e-06
0.63873	1.987e-06	0.63873	2.6059e-06	0.63873	2.93549e-06
0.64117	1.98273e-06	0.64117	2.60132e-06	0.64117	2.92236e-06
0.64362	1.97968e-06	0.64362	2.59552e-06	0.64362	2.90833e-06
0.64606	1.9754e-06	0.64606	2.59308e-06	0.64606	2.89551e-06
0.6485	1.97205e-06	0.6485	2.58636e-06	0.6485	2.88361e-06
0.65094	1.96655e-06	0.65094	2.58301e-06	0.65094	2.87109e-06
0.65338	1.96228e-06	0.65338	2.57843e-06	0.65338	2.85736e-06
0.65582	1.95862e-06	0.65582	2.57568e-06	0.65582	2.84546e-06
0.65826	1.95251e-06	0.65826	2.57202e-06	0.65826	2.83142e-06
0.66071	1.94794e-06	0.66071	2.56836e-06	0.66071	2.82043e-06
0.66315	1.94214e-06	0.66315	2.56287e-06	0.66315	2.80731e-06
0.66559	1.93848e-06	0.66559	2.56195e-06	0.66559	2.79419e-06
0.66803	1.93268e-06	0.66803	2.55737e-06	0.66803	2.78229e-06
0.67047	1.92963e-06	0.67047	2.55493e-06	0.67047	2.77069e-06
0.67291	1.92291e-06	0.67291	2.55219e-06	0.67291	2.75757e-06
0.67535	1.91956e-06	0.67535	2.54913e-06	0.67535	2.74841e-06
0.6778	1.91406e-06	0.6778	2.547e-06	0.6778	2.73529e-06
0.68024	1.90918e-06	0.68024	2.54395e-06	0.68024	2.72522e-06
0.68268	1.90582e-06	0.68268	2.53998e-06	0.68268	2.71332e-06
0.68512	1.90094e-06	0.68512	2.53815e-06	0.68512	2.70294e-06
0.68756	1.89575e-06	0.68756	2.5351e-06	0.68756	2.69165e-06
0.69	1.89331e-06	0.69	2.53357e-06	0.69	2.68158e-06
0.69244	1.88873e-06	0.69244	2.53052e-06	0.69244	2.67212e-06
0.69489	1.88568e-06	0.69489	2.52838e-06	0.69489	2.66296e-06
0.69733	1.88202e-06	0.69733	2.52533e-06	0.69733	2.65137e-06
0.69977	1.87866e-06	0.69977	2.52167e-06	0.69977	2.64313e-06
0.70221	1.875e-06	0.70221	2.52014e-06	0.70221	2.63458e-06
0.70465	1.87225e-06	0.70465	2.51862e-06	0.70465	2.62573e-06
0.70709	1.86737e-06	0.70709	2.51526e-06	0.70709	2.61719e-06
0.70953	1.86432e-06	0.70953	2.51282e-06	0.70953	2.60925e-06
0.71198	1.86188e-06	0.71198	2.51068e-06	0.71198	2.60101e-06
0.71442	1.86035e-06	0.71442	2.50793e-06	0.71442	2.59491e-06
0.71686	1.85913e-06	0.71686	2.50397e-06	0.71686	2.58636e-06
0.7193	1.85822e-06	0.7193	2.50549e-06	0.7193	2.58057e-06
0.72174	1.85516e-06	0.72174	2.50092e-06	0.72174	2.57141e-06
0.72418	1.85364e-06	0.72418	2.5e-06	0.72418	2.56348e-06
0.72662	1.85059e-06	0.72662	2.49695e-06	0.72662	2.55737e-06
0.72906	1.84875e-06	0.72906	2.49664e-06	0.72906	2.55066e-06
0.73151	1.84601e-06	0.73151	2.4939e-06	0.73151	2.54486e-06
0.73395	1.84387e-06	0.73395	2.49451e-06	0.73395	2.53906e-06
0.73639	1.84143e-06	0.73639	2.49268e-06	0.73639	2.53021e-06
0.73883	1.84052e-06	0.73883	2.49084e-06	0.73883	2.52594e-06
0.74127	1.83746e-06	0.74127	2.4884e-06	0.74127	2.51953e-06
0.74371	1.83655e-06	0.74371	2.48596e-06	0.74371	2.51312e-06
0.74615	1.83533e-06	0.74615	2.4826e-06	0.74615	2.50763e-06
0.7486	1.83411e-06	0.7486	2.48016e-06	0.7486	2.50031e-06
0.75104	1.83167e-06	0.75104	2.48108e-06	0.75104	2.49481e-06
0.75348	1.83075e-06	0.75348	2.47894e-06	0.75348	2.49023e-06
0.75592	1.828e-06	0.75592	2.47894e-06	0.75592	2.48566e-06
0.75836	1.82709e-06	0.75836	2.47742e-06	0.75836	2.47986e-06
0.7608	1.82587e-06	0.7608	2.47498e-06	0.7608	2.47406e-06
0.76324	1.82434e-06	0.76324	2.4762e-06	0.76324	2.46918e-06
0.76569	1.8219e-06	0.76569	2.47223e-06	0.76569	2.4646e-06
0.76813	1.82129e-06	0.76813	2.47253e-06	0.76813	2.45819e-06
0.77057	1.81915e-06	0.77057	2.47101e-06	0.77057	2.45636e-06
0.77301	1.81793e-06	0.77301	2.47314e-06	0.77301	2.45087e-06
0.77545	1.81824e-06	0.77545	2.4707e-06	0.77545	2.44598e-06
0.77789	1.8158e-06	0.77789	2.47101e-06	0.77789	2.44171e-06
0.78033	1.81519e-06	0.78033	2.4704e-06	0.78033	2.43774e-06
0.78278	1.81549e-06	0.78278	2.46979e-06	0.78278	2.43317e-06
0.78522	1.81549e-06	0.78522	2.46979e-06	0.78522	2.4295e-06
0.78766	1.81519e-06	0.78766	2.46948e-06	0.78766	2.42554e-06
0.7901	1.81396e-06	0.7901	2.47009e-06	0.7901	2.42157e-06
0.79254	1.81488e-06	0.79254	2.47101e-06	0.79254	2.42004e-06
0.79498	1.81488e-06	0.79498	2.47009e-06	0.79498	2.41486e-06
0.79742	1.81458e-06	0.79742	2.4707e-06	0.79742	2.41333e-06
0.79987	1.81305e-06	0.79987	2.47162e-06	0.79987	2.40936e-06
0.80231	1.81152e-06	0.80231	2.47223e-06	0.80231	2.4057e-06
0.80475	1.80908e-06	0.80475	2.47131e-06	0.80475	2.40326e-06
0.80719	1.80847e-06	0.80719	2.47314e-06	0.80719	2.40021e-06
0.80963	1.80756e-06	0.80963	2.47345e-06	0.80963	2.39868e-06
0.81207	1.80664e-06	0.81207	2.47406e-06	0.81207	2.39594e-06
0.81451	1.80603e-06	0.81451	2.47314e-06	0.81451	2.39471e-06
0.81696	1.80511e-06	0.81696	2.47589e-06	0.81696	2.39227e-06
0.8194	1.80389e-06	0.8194	2.47681e-06	0.8194	2.38983e-06
0.82184	1.8045e-06	0.82184	2.47803e-06	0.82184	2.38861e-06
0.82428	1.80573e-06	0.82428	2.47894e-06	0.82428	2.38678e-06
0.82672	1.80664e-06	0.82672	2.48108e-06	0.82672	2.38586e-06
0.82916	1.80603e-06	0.82916	2.48291e-06	0.82916	2.38434e-06
0.8316	1.80908e-06	0.8316	2.48505e-06	0.8316	2.38434e-06
0.83405	1.80939e-06	0.83405	2.48596e-06	0.83405	2.38403e-06
0.83649	1.81091e-06	0.83649	2.4881e-06	0.83649	2.38251e-06
0.83893	1.80969e-06	0.83893	2.48962e-06	0.83893	2.3819e-06
0.84137	1.81335e-06	0.84137	2.49207e-06	0.84137	2.38129e-06
0.84381	1.81519e-06	0.84381	2.49237e-06	0.84381	2.38068e-06
0.84625	1.81641e-06	0.84625	2.49542e-06	0.84625	2.38068e-06
0.84869	1.82098e-06	0.84869	2.49847e-06	0.84869	2.38098e-06
0.85114	1.82312e-06	0.85114	2.50153e-06	0.85114	2.38129e-06
0.85358	1.8277e-06	0.85358	2.50549e-06	0.85358	2.37976e-06
0.85602	1.82892e-06	0.85602	2.50946e-06	0.85602	2.37885e-06
0.85846	1.83014e-06	0.85846	2.51221e-06	0.85846	2.37885e-06
0.8609	1.83167e-06	0.8609	2.51648e-06	0.8609	2.37701e-06
0.86334	1.83411e-06	0.86334	2.51984e-06	0.86334	2.37854e-06
0.86578	1.83533e-06	0.86578	2.52441e-06	0.86578	2.37854e-06
0.86823	1.83685e-06	0.86823	2.5293e-06	0.86823	2.37976e-06
0.87067	1.83777e-06	0.87067	2.53479e-06	0.87067	2.37946e-06
0.87311	1.83807e-06	0.87311	2.53937e-06	0.87311	2.37946e-06
0.87555	1.8399e-06	0.87555	2.54608e-06	0.87555	2.37885e-06
0.87799	1.84052e-06	0.87799	2.5528e-06	0.87799	2.37946e-06
0.88043	1.8399e-06	0.88043	2.55829e-06	0.88043	2.38007e-06
0.88287	1.84174e-06	0.88287	2.56622e-06	0.88287	2.37976e-06
0.88531	1.84296e-06	0.88531	2.57202e-06	0.88531	2.38037e-06
0.88776	1.84601e-06	0.88776	2.57904e-06	0.88776	2.38037e-06
0.8902	1.84723e-06	0.8902	2.58759e-06	0.8902	2.38007e-06
0.89264	1.84967e-06	0.89264	2.59399e-06	0.89264	2.3822e-06
0.89508	1.85028e-06	0.89508	2.60254e-06	0.89508	2.38373e-06
0.89752	1.84967e-06	0.89752	2.612e-06	0.89752	2.38373e-06
0.89996	1.85272e-06	0.89996	2.61993e-06	0.89996	2.38556e-06
0.9024	1.85364e-06	0.9024	2.62909e-06	0.9024	2.38708e-06
0.90485	1.85455e-06	0.90485	2.64008e-06	0.90485	2.3877e-06
0.90729	1.85699e-06	0.90729	2.64893e-06	0.90729	2.3877e-06
0.90973	1.85852e-06	0.90973	2.65961e-06	0.90973	2.39044e-06
0.91217	1.86279e-06	0.91217	2.6709e-06	0.91217	2.39166e-06
0.91461	1.86737e-06	0.91461	2.6825e-06	0.91461	2.39105e-06
0.91705	1.87073e-06	0.91705	2.69257e-06	0.91705	2.3938e-06
0.91949	1.87439e-06	0.91949	2.70538e-06	0.91949	2.39807e-06
0.92194	1.87592e-06	0.92194	2.71637e-06	0.92194	2.40051e-06
0.92438	1.87836e-06	0.92438	2.72888e-06	0.92438	2.4054e-06
0.92682	1.8811e-06	0.92682	2.74292e-06	0.92682	2.41028e-06
0.92926	1.88416e-06	0.92926	2.75696e-06	0.92926	2.41364e-06
0.9317	1.88934e-06	0.9317	2.77008e-06	0.9317	2.41791e-06
0.93414	1.89423e-06	0.93414	2.78503e-06	0.93414	2.4231e-06
0.93658	1.89789e-06	0.93658	2.79938e-06	0.93658	2.42645e-06
0.93903	1.90186e-06	0.93903	2.81433e-06	0.93903	2.43317e-06
0.94147	1.90582e-06	0.94147	2.82898e-06	0.94147	2.43652e-06
0.94391	1.90826e-06	0.94391	2.84454e-06	0.94391	2.44354e-06
0.94635	1.91284e-06	0.94635	2.86041e-06	0.94635	2.44934e-06
0.94879	1.91589e-06	0.94879	2.87872e-06	0.94879	2.45392e-06
0.95123	1.91833e-06	0.95123	2.89398e-06	0.95123	2.46124e-06
0.95367	1.92535e-06	0.95367	2.91138e-06	0.95367	2.46704e-06
0.95612	1.92932e-06	0.95612	2.93121e-06	0.95612	2.47437e-06
0.95856	1.93237e-06	0.95856	2.94769e-06	0.95856	2.48138e-06
0.961	1.93787e-06	0.961	2.96539e-06	0.961	2.48962e-06
0.96344	1.94244e-06	0.96344	2.98492e-06	0.96344	2.49725e-06
0.96588	1.94702e-06	0.96588	3.00385e-06	0.96588	2.50305e-06
0.96832	1.95282e-06	0.96832	3.02368e-06	0.96832	2.51434e-06
0.97076	1.95679e-06	0.97076	3.04443e-06	0.97076	2.52106e-06
0.97321	1.96045e-06	0.97321	3.0658e-06	0.97321	2.53143e-06
0.97565	1.96442e-06	0.97565	3.08594e-06	0.97565	2.53998e-06
0.97809	1.96991e-06	0.97809	3.10883e-06	0.97809	2.55005e-06
0.98053	1.97601e-06	0.98053	3.12958e-06	0.98053	2.56012e-06
0.98297	1.98212e-06	0.98297	3.15338e-06	0.98297	2.56927e-06
0.98541	1.98883e-06	0.98541	3.17657e-06	0.98541	2.57965e-06
0.98785	1.99677e-06	0.98785	3.20313e-06	0.98785	2.59155e-06
0.9903	2.00287e-06	0.9903	3.2251e-06	0.9903	2.59918e-06
0.99274	2.00867e-06	0.99274	3.25073e-06	0.99274	2.612e-06
0.99518	2.01691e-06	0.99518	3.27637e-06	0.99518	2.6239e-06
0.99762	2.02393e-06	0.99762	3.30292e-06	0.99762	2.63611e-06
1.00006	2.03217e-06	1.00006	3.32703e-06	1.00006	2.64862e-06
1.0025	2.03888e-06	1.0025	3.35388e-06	1.0025	2.66144e-06
1.00494	2.04742e-06	1.00494	3.38043e-06	1.00494	2.67365e-06
1.00739	2.05566e-06	1.00739	3.40729e-06	1.00739	2.68799e-06
1.00983	2.06238e-06	1.00983	3.43292e-06	1.00983	2.70081e-06
1.01227	2.07092e-06	1.01227	3.46344e-06	1.01227	2.71606e-06
1.01471	2.07947e-06	1.01471	3.48938e-06	1.01471	2.72919e-06
1.01715	2.08801e-06	1.01715	3.52051e-06	1.01715	2.74292e-06
1.01959	2.09625e-06	1.01959	3.54797e-06	1.01959	2.75909e-06
1.02203	2.10632e-06	1.02203	3.57819e-06	1.02203	2.77344e-06
1.02448	2.11548e-06	1.02448	3.60962e-06	1.02448	2.789e-06
1.02692	2.12341e-06	1.02692	3.64075e-06	1.02692	2.80579e-06
1.02936	2.13287e-06	1.02936	3.67035e-06	1.02936	2.82104e-06
1.0318	2.14417e-06	1.0318	3.70361e-06	1.0318	2.83844e-06
1.03424	2.15393e-06	1.03424	3.73596e-06	1.03424	2.8537e-06
1.03668	2.16461e-06	1.03668	3.77014e-06	1.03668	2.87231e-06
1.03912	2.1756e-06	1.03912	3.80219e-06	1.03912	2.88879e-06
1.04156	2.18719e-06	1.04156	3.83545e-06	1.04156	2.90741e-06
1.04401	2.1994e-06	1.04401	3.87115e-06	1.04401	2.92603e-06
1.04645	2.20947e-06	1.04645	3.90625e-06	1.04645	2.94525e-06
1.04889	2.21893e-06	1.04889	3.94104e-06	1.04889	2.96356e-06
1.05133	2.22961e-06	1.05133	3.97675e-06	1.05133	2.98492e-06
1.05377	2.2348e-06	1.05377	4.01276e-06	1.05377	3.00232e-06
1.05621	2.24091e-06	1.05621	4.04877e-06	1.05621	3.02216e-06
1.05865	2.24487e-06	1.05865	4.08661e-06	1.05865	3.0423e-06
1.0611	2.24792e-06	1.0611	4.12354e-06	1.0611	3.06305e-06
1.06354	2.2522e-06	1.06354	4.16077e-06	1.06354	3.08502e-06
1.06598	2.26013e-06	1.06598	4.20074e-06	1.06598	3.1073e-06
1.06842	2.26715e-06	1.06842	4.23828e-06	1.06842	3.12805e-06
1.07086	2.27661e-06	1.07086	4.27826e-06	1.07086	3.15247e-06
1.0733	2.2876e-06	1.0733	4.3158e-06	1.0733	3.17261e-06
1.07574	2.2995e-06	1.07574	4.3576e-06	1.07574	3.19641e-06
1.07819	2.30957e-06	1.07819	4.39667e-06	1.07819	3.22021e-06
1.08063	2.31934e-06	1.08063	4.43726e-06	1.08063	3.24402e-06
1.08307	2.32605e-06	1.08307	4.47906e-06	1.08307	3.26996e-06
1.08551	2.33398e-06	1.08551	4.52393e-06	1.08551	3.29437e-06
1.08795	2.34283e-06	1.08795	4.5639e-06	1.08795	3.31909e-06
1.09039	2.35504e-06	1.09039	4.60907e-06	1.09039	3.34473e-06
1.09283	2.36755e-06	1.09283	4.65057e-06	1.09283	3.37006e-06
1.09528	2.3822e-06	1.09528	4.69421e-06	1.09528	3.39844e-06
1.09772	2.39502e-06	1.09772	4.73846e-06	1.09772	3.42468e-06
1.10016	2.40723e-06	1.10016	4.78363e-06	1.10016	3.44971e-06
1.1026	2.41974e-06	1.1026	4.8288e-06	1.1026	3.47778e-06
1.10504	2.43195e-06	1.10504	4.87549e-06	1.10504	3.50586e-06
1.10748	2.44415e-06	1.10748	4.92096e-06	1.10748	3.53302e-06
1.10992	2.45667e-06	1.10992	4.96765e-06	1.10992	3.56354e-06
1.11237	2.46796e-06	1.11237	5.01221e-06	1.11237	3.5907e-06
1.11481	2.48108e-06	1.11481	5.06104e-06	1.11481	3.62091e-06
1.11725	2.49359e-06	1.11725	5.10651e-06	1.11725	3.64899e-06
1.11969	2.50824e-06	1.11969	5.15381e-06	1.11969	3.68042e-06
1.12213	2.52228e-06	1.12213	5.20264e-06	1.12213	3.70758e-06
1.12457	2.53784e-06	1.12457	5.25208e-06	1.12457	3.74176e-06
1.12701	2.55066e-06	1.12701	5.3009e-06	1.12701	3.77167e-06
1.12946	2.56683e-06	1.12946	5.35065e-06	1.12946	3.8028e-06
1.1319	2.58148e-06	1.1319	5.40009e-06	1.1319	3.83667e-06
1.13434	2.59827e-06	1.13434	5.45135e-06	1.13434	3.86719e-06
1.13678	2.61047e-06	1.13678	5.50079e-06	1.13678	3.89771e-06
1.13922	2.62756e-06	1.13922	5.55176e-06	1.13922	3.9325e-06
1.14166	2.6416e-06	1.14166	5.60486e-06	1.14166	3.96759e-06
1.1441	2.65717e-06	1.1441	5.65765e-06	1.1441	4.00024e-06
1.14655	2.67212e-06	1.14655	5.70892e-06	1.14655	4.03381e-06
1.14899	2.68799e-06	1.14899	5.76233e-06	1.14899	4.06921e-06
1.15143	2.70233e-06	1.15143	5.81512e-06	1.15143	4.10156e-06
1.15387	2.71881e-06	1.15387	5.87006e-06	1.15387	4.13727e-06
1.15631	2.73438e-06	1.15631	5.92285e-06	1.15631	4.17358e-06
1.15875	2.75055e-06	1.15875	5.97839e-06	1.15875	4.20929e-06
1.16119	2.76642e-06	1.16119	6.03363e-06	1.16119	4.24622e-06
1.16364	2.78229e-06	1.16364	6.09131e-06	1.16364	4.28314e-06
1.16608	2.79755e-06	1.16608	6.14624e-06	1.16608	4.31976e-06
1.16852	2.81403e-06	1.16852	6.20422e-06	1.16852	4.35669e-06
1.17096	2.83081e-06	1.17096	6.25916e-06	1.17096	4.39362e-06
1.1734	2.8479e-06	1.1734	6.31714e-06	1.1734	4.43268e-06
1.17584	2.86407e-06	1.17584	6.37207e-06	1.17584	4.47021e-06
1.17828	2.87964e-06	1.17828	6.43005e-06	1.17828	4.50897e-06
1.18073	2.89612e-06	1.18073	6.48804e-06	1.18073	4.54773e-06
1.18317	2.91565e-06	1.18317	6.55212e-06	1.18317	4.58832e-06
1.18561	2.92908e-06	1.18561	6.60706e-06	1.18561	4.62494e-06
1.18805	2.94647e-06	1.18805	6.66809e-06	1.18805	4.66705e-06
1.19049	2.96295e-06	1.19049	6.72913e-06	1.19049	4.7052e-06
1.19293	2.98035e-06	1.19293	6.79016e-06	1.19293	4.7467e-06
1.19537	2.99744e-06	1.19537	6.84814e-06	1.19537	4.78638e-06
1.19781	3.01361e-06	1.19781	6.91223e-06	1.19781	4.8288e-06
1.20026	3.03162e-06	1.20026	6.97021e-06	1.20026	4.86877e-06
1.2027	3.0545e-06	1.2027	7.0343e-06	1.2027	4.91089e-06
1.20514	3.07129e-06	1.20514	7.09534e-06	1.20514	4.953e-06
1.20758	3.0896e-06	1.20758	7.15942e-06	1.20758	4.99481e-06
1.21002	3.1076e-06	1.21002	7.22046e-06	1.21002	5.03937e-06
1.21246	3.12683e-06	1.21246	7.28455e-06	1.21246	5.08057e-06
1.2149	3.14667e-06	1.2149	7.35168e-06	1.2149	5.12451e-06
1.21735	3.16559e-06	1.21735	7.41272e-06	1.21735	5.16724e-06
1.21979	3.18604e-06	1.21979	7.47681e-06	1.21979	5.21149e-06
1.22223	3.2077e-06	1.22223	7.547e-06	1.22223	5.25879e-06
1.22467	3.22632e-06	1.22467	7.60803e-06	1.22467	5.3009e-06
1.22711	3.24921e-06	1.22711	7.67517e-06	1.22711	5.34729e-06
1.22955	3.26996e-06	1.22955	7.74231e-06	1.22955	5.39154e-06
1.23199	3.29376e-06	1.23199	7.80945e-06	1.23199	5.43793e-06
1.23444	3.31268e-06	1.23444	7.87354e-06	1.23444	5.48187e-06
1.23688	3.33679e-06	1.23688	7.94067e-06	1.23688	5.52795e-06
1.23932	3.3606e-06	1.23932	8.00781e-06	1.23932	5.57312e-06
1.24176	3.38226e-06	1.24176	8.078e-06	1.24176	5.62378e-06
1.2442	3.40424e-06	1.2442	8.14819e-06	1.2442	5.67078e-06
1.24664	3.42651e-06	1.24664	8.21533e-06	1.24664	5.71869e-06
1.24908	3.44879e-06	1.24908	8.28247e-06	1.24908	5.76447e-06
1.25153	3.47107e-06	1.25153	8.35266e-06	1.25153	5.8136e-06
1.25397	3.49365e-06	1.25397	8.4198e-06	1.25397	5.85999e-06
1.25641	3.51715e-06	1.25641	8.48999e-06	1.25641	5.90851e-06
1.25885	3.54065e-06	1.25885	8.56018e-06	1.25885	5.95734e-06
1.26129	3.56567e-06	1.26129	8.63037e-06	1.26129	6.00891e-06
1.26373	3.58978e-06	1.26373	8.69751e-06	1.26373	6.05774e-06
1.26617	3.61481e-06	1.26617	8.77075e-06	1.26617	6.10962e-06
1.26862	3.64044e-06	1.26862	8.84094e-06	1.26862	6.15845e-06
1.27106	3.66608e-06	1.27106	8.91418e-06	1.27106	6.21033e-06
1.2735	3.69141e-06	1.2735	8.98438e-06	1.2735	6.25916e-06
1.27594	3.72192e-06	1.27594	9.05762e-06	1.27594	6.31104e-06
1.27838	3.74725e-06	1.27838	9.13086e-06	1.27838	6.36292e-06
1.28082	3.77502e-06	1.28082	9.20715e-06	1.28082	6.41785e-06
1.28326	3.79913e-06	1.28326	9.27734e-06	1.28326	6.46667e-06
1.28571	3.82751e-06	1.28571	9.35364e-06	1.28571	6.51855e-06
1.28815	3.85406e-06	1.28815	9.42383e-06	1.28815	6.57349e-06
1.29059	3.88031e-06	1.29059	9.49707e-06	1.29059	6.62537e-06
1.29303	3.90839e-06	1.29303	9.57031e-06	1.29303	6.67725e-06
1.29547	3.93372e-06	1.29547	9.64661e-06	1.29547	6.73218e-06
1.29791	3.95996e-06	1.29791	9.71985e-06	1.29791	6.78711e-06
1.30035	3.99017e-06	1.30035	9.79614e-06	1.30035	6.84204e-06
1.3028	4.01642e-06	1.3028	9.86938e-06	1.3028	6.89697e-06
1.30524	4.04724e-06	1.30524	9.94568e-06	1.30524	6.9519e-06
1.30768	4.0741e-06	1.30768	1.00189e-05	1.30768	7.00684e-06
1.31012	4.10217e-06	1.31012	1.00983e-05	1.31012	7.06177e-06
1.31256	4.13116e-06	1.31256	1.01685e-05	1.31256	7.1167e-06
1.315	4.15894e-06	1.315	1.02448e-05	1.315	7.17163e-06
1.31744	4.18579e-06	1.31744	1.0318e-05	1.31744	7.22961e-06
1.31989	4.21692e-06	1.31989	1.03973e-05	1.31989	7.2876e-06
1.32233	4.24744e-06	1.32233	1.04706e-05	1.32233	7.34253e-06
1.32477	4.27856e-06	1.32477	1.05469e-05	1.32477	7.40051e-06
1.32721	4.30969e-06	1.32721	1.06201e-05	1.32721	7.45544e-06
1.32965	4.34174e-06	1.32965	1.06995e-05	1.32965	7.51343e-06
1.33209	4.37347e-06	1.33209	1.07727e-05	1.33209	7.57141e-06
1.33453	4.40491e-06	1.33453	1.08459e-05	1.33453	7.62634e-06
1.33698	4.43848e-06	1.33698	1.09222e-05	1.33698	7.68738e-06
1.33942	4.47479e-06	1.33942	1.10016e-05	1.33942	7.74841e-06
1.34186	4.50592e-06	1.34186	1.10748e-05	1.34186	7.8064e-06
1.3443	4.53857e-06	1.3443	1.11511e-05	1.3443	7.86743e-06
1.34674	4.5697e-06	1.34674	1.12244e-05	1.34674	7.92236e-06
1.34918	4.60236e-06	1.34918	1.12976e-05	1.34918	7.98645e-06
1.35162	4.63501e-06	1.35162	1.13708e-05	1.35162	8.04138e-06
1.35406	4.66888e-06	1.35406	1.14441e-05	1.35406	8.10242e-06
1.35651	4.70184e-06	1.35651	1.15173e-05	1.35651	8.1604e-06
1.35895	4.73663e-06	1.35895	1.15936e-05	1.35895	8.22144e-06
1.36139	4.76929e-06	1.36139	1.16638e-05	1.36139	8.27942e-06
1.36383	4.80774e-06	1.36383	1.17371e-05	1.36383	8.34351e-06
1.36627	4.84131e-06	1.36627	1.18042e-05	1.36627	8.40149e-06
1.36871	4.87854e-06	1.36871	1.18774e-05	1.36871	8.46252e-06
1.37115	4.91425e-06	1.37115	1.19476e-05	1.37115	8.51746e-06
1.3736	4.95026e-06	1.3736	1.20178e-05	1.3736	8.57849e-06
1.37604	4.98749e-06	1.37604	1.2088e-05	1.37604	8.63953e-06
1.37848	5.02472e-06	1.37848	1.21582e-05	1.37848	8.70056e-06
1.38092	5.05737e-06	1.38092	1.22253e-05	1.38092	8.75854e-06
1.38336	5.09583e-06	1.38336	1.22986e-05	1.38336	8.81653e-06
1.3858	5.1297e-06	1.3858	1.23627e-05	1.3858	8.87451e-06
1.38824	5.16785e-06	1.38824	1.24329e-05	1.38824	8.93555e-06
1.39069	5.20264e-06	1.39069	1.24969e-05	1.39069	8.99353e-06
1.39313	5.23834e-06	1.39313	1.25641e-05	1.39313	9.05151e-06
1.39557	5.27618e-06	1.39557	1.26282e-05	1.39557	9.11255e-06
1.39801	5.31464e-06	1.39801	1.26984e-05	1.39801	9.17053e-06
1.40045	5.3537e-06	1.40045	1.27594e-05	1.40045	9.22546e-06
1.40289	5.39246e-06	1.40289	1.28265e-05	1.40289	9.2865e-06
1.40533	5.43182e-06	1.40533	1.28876e-05	1.40533	9.34143e-06
1.40778	5.47119e-06	1.40778	1.29517e-05	1.40778	9.39941e-06
1.41022	5.51178e-06	1.41022	1.30157e-05	1.41022	9.4574e-06
1.41266	5.55054e-06	1.41266	1.30798e-05	1.41266	9.51233e-06
1.4151	5.59174e-06	1.4151	1.31409e-05	1.4151	9.56726e-06
1.41754	5.63385e-06	1.41754	1.3208e-05	1.41754	9.62524e-06
1.41998	5.67444e-06	1.41998	1.3266e-05	1.41998	9.67712e-06
1.42242	5.71747e-06	1.42242	1.33331e-05	1.42242	9.73511e-06
1.42487	5.75867e-06	1.42487	1.33942e-05	1.42487	9.78699e-06
1.42731	5.80475e-06	1.42731	1.34583e-05	1.42731	9.84192e-06
1.42975	5.84595e-06	1.42975	1.35162e-05	1.42975	9.8938e-06
1.43219	5.89325e-06	1.43219	1.35803e-05	1.43219	9.94568e-06
1.43463	5.93567e-06	1.43463	1.36414e-05	1.43463	9.99756e-06
1.43707	5.98114e-06	1.43707	1.37085e-05	1.43707	1.00494e-05
1.43951	6.02356e-06	1.43951	1.37695e-05	1.43951	1.01044e-05
1.44196	6.073e-06	1.44196	1.38336e-05	1.44196	1.01624e-05
1.4444	6.11572e-06	1.4444	1.38947e-05	1.4444	1.02173e-05
1.44684	6.16455e-06	1.44684	1.39587e-05	1.44684	1.02631e-05
1.44928	6.20728e-06	1.44928	1.40198e-05	1.44928	1.03088e-05
1.45172	6.25305e-06	1.45172	1.40839e-05	1.45172	1.03516e-05
1.45416	6.29883e-06	1.45416	1.41479e-05	1.45416	1.04034e-05
1.4566	6.34155e-06	1.4566	1.42181e-05	1.4566	1.04553e-05
1.45905	6.38733e-06	1.45905	1.42792e-05	1.45905	1.0498e-05
1.46149	6.43311e-06	1.46149	1.43494e-05	1.46149	1.0556e-05
1.46393	6.47888e-06	1.46393	1.44135e-05	1.46393	1.05988e-05
1.46637	6.52771e-06	1.46637	1.44836e-05	1.46637	1.06445e-05
1.46881	6.57043e-06	1.46881	1.45477e-05	1.46881	1.06873e-05
1.47125	6.61926e-06	1.47125	1.46179e-05	1.47125	1.0733e-05
1.47369	6.66809e-06	1.47369	1.46881e-05	1.47369	1.07819e-05
1.47614	6.71997e-06	1.47614	1.47614e-05	1.47614	1.08307e-05
1.47858	6.7688e-06	1.47858	1.48285e-05	1.47858	1.08765e-05
1.48102	6.82068e-06	1.48102	1.49048e-05	1.48102	1.09253e-05
1.48346	6.86951e-06	1.48346	1.4975e-05	1.48346	1.09711e-05
1.4859	6.92139e-06	1.4859	1.50513e-05	1.4859	1.10199e-05
1.48834	6.97021e-06	1.48834	1.51276e-05	1.48834	1.10687e-05
1.49078	7.02209e-06	1.49078	1.52069e-05	1.49078	1.11176e-05
1.49323	7.07397e-06	1.49323	1.52863e-05	1.49323	1.11694e-05
1.49567	7.12891e-06	1.49567	1.53687e-05	1.49567	1.12213e-05
1.49811	7.18384e-06	1.49811	1.5451e-05	1.49811	1.12701e-05
1.50055	7.23877e-06	1.50055	1.55365e-05	1.50055	1.13251e-05

## Sheet: Figure S10(f)
-1.4975	-3.04474e-05	-1.4975	-5.23581e-05	-1.4975	-4.17139e-05
-1.49506	-2.46704e-05	-1.49506	-4.42069e-05	-1.49506	-3.56379e-05
-1.49261	-2.13959e-05	-1.49261	-3.93058e-05	-1.49261	-3.19483e-05
-1.49017	-1.92291e-05	-1.49017	-3.59061e-05	-1.49017	-2.93757e-05
-1.48773	-1.76483e-05	-1.48773	-3.33335e-05	-1.48773	-2.74134e-05
-1.48529	-1.64337e-05	-1.48529	-3.1298e-05	-1.48529	-2.5857e-05
-1.48285	-1.54449e-05	-1.48285	-2.96134e-05	-1.48285	-2.45661e-05
-1.48041	-1.46301e-05	-1.48041	-2.81913e-05	-1.48041	-2.34705e-05
-1.47797	-1.39313e-05	-1.47797	-2.69584e-05	-1.47797	-2.25153e-05
-1.47552	-1.3327e-05	-1.47552	-2.5875e-05	-1.47552	-2.16791e-05
-1.47308	-1.2793e-05	-1.47308	-2.49106e-05	-1.47308	-2.09223e-05
-1.47064	-1.23199e-05	-1.47064	-2.40439e-05	-1.47064	-2.02479e-05
-1.4682	-1.18896e-05	-1.4682	-2.32535e-05	-1.4682	-1.96253e-05
-1.46576	-1.15021e-05	-1.46576	-2.25394e-05	-1.46576	-1.90638e-05
-1.46332	-1.11481e-05	-1.46332	-2.18711e-05	-1.46332	-1.85358e-05
-1.46088	-1.08215e-05	-1.46088	-2.12607e-05	-1.46088	-1.80536e-05
-1.45844	-1.05164e-05	-1.45844	-2.0687e-05	-1.45844	-1.75989e-05
-1.45599	-1.02356e-05	-1.45599	-2.01499e-05	-1.45599	-1.71747e-05
-1.45355	-9.97314e-06	-1.45355	-1.96463e-05	-1.45355	-1.67689e-05
-1.45111	-9.729e-06	-1.45111	-1.91764e-05	-1.45111	-1.63935e-05
-1.44867	-9.49707e-06	-1.44867	-1.87247e-05	-1.44867	-1.60334e-05
-1.44623	-9.28345e-06	-1.44623	-1.83036e-05	-1.44623	-1.56946e-05
-1.44379	-9.07593e-06	-1.44379	-1.78977e-05	-1.44379	-1.53711e-05
-1.44135	-8.88672e-06	-1.44135	-1.75162e-05	-1.44135	-1.50599e-05
-1.4389	-8.70056e-06	-1.4389	-1.715e-05	-1.4389	-1.47638e-05
-1.43646	-8.52661e-06	-1.43646	-1.67991e-05	-1.43646	-1.448e-05
-1.43402	-8.35876e-06	-1.43402	-1.64573e-05	-1.43402	-1.42054e-05
-1.43158	-8.20007e-06	-1.43158	-1.61399e-05	-1.43158	-1.3946e-05
-1.42914	-8.04443e-06	-1.42914	-1.58255e-05	-1.42914	-1.36957e-05
-1.4267	-7.901e-06	-1.4267	-1.55326e-05	-1.4267	-1.34516e-05
-1.42426	-7.76367e-06	-1.42426	-1.52427e-05	-1.42426	-1.32166e-05
-1.42181	-7.62939e-06	-1.42181	-1.4968e-05	-1.42181	-1.29908e-05
-1.41937	-7.50122e-06	-1.41937	-1.46994e-05	-1.41937	-1.27741e-05
-1.41693	-7.37915e-06	-1.41693	-1.444e-05	-1.41693	-1.25635e-05
-1.41449	-7.26013e-06	-1.41449	-1.41867e-05	-1.41449	-1.2353e-05
-1.41205	-7.14722e-06	-1.41205	-1.39457e-05	-1.41205	-1.21576e-05
-1.40961	-7.0343e-06	-1.40961	-1.37107e-05	-1.40961	-1.19623e-05
-1.40717	-6.92749e-06	-1.40717	-1.34848e-05	-1.40717	-1.17762e-05
-1.40472	-6.82373e-06	-1.40472	-1.32621e-05	-1.40472	-1.15931e-05
-1.40228	-6.72302e-06	-1.40228	-1.30484e-05	-1.40228	-1.14161e-05
-1.39984	-6.62231e-06	-1.39984	-1.28379e-05	-1.39984	-1.12421e-05
-1.3974	-6.52466e-06	-1.3974	-1.26334e-05	-1.3974	-1.10712e-05
-1.39496	-6.43005e-06	-1.39496	-1.2435e-05	-1.39496	-1.09034e-05
-1.39252	-6.34155e-06	-1.39252	-1.22428e-05	-1.39252	-1.07416e-05
-1.39008	-6.25e-06	-1.39008	-1.20505e-05	-1.39008	-1.05829e-05
-1.38763	-6.16455e-06	-1.38763	-1.18705e-05	-1.38763	-1.04273e-05
-1.38519	-6.0791e-06	-1.38519	-1.16874e-05	-1.38519	-1.02747e-05
-1.38275	-5.99976e-06	-1.38275	-1.15165e-05	-1.38275	-1.01252e-05
-1.38031	-5.91736e-06	-1.38031	-1.13425e-05	-1.38031	-9.98174e-06
-1.37787	-5.84106e-06	-1.37787	-1.11777e-05	-1.37787	-9.84136e-06
-1.37543	-5.76477e-06	-1.37543	-1.10129e-05	-1.37543	-9.70098e-06
-1.37299	-5.68848e-06	-1.37299	-1.08542e-05	-1.37299	-9.56975e-06
-1.37054	-5.61829e-06	-1.37054	-1.06986e-05	-1.37054	-9.43548e-06
-1.3681	-5.5481e-06	-1.3681	-1.05429e-05	-1.3681	-9.3073e-06
-1.36566	-5.47791e-06	-1.36566	-1.03934e-05	-1.36566	-9.17913e-06
-1.36322	-5.41077e-06	-1.36322	-1.02469e-05	-1.36322	-9.05706e-06
-1.36078	-5.34668e-06	-1.36078	-1.01035e-05	-1.36078	-8.93499e-06
-1.35834	-5.28259e-06	-1.35834	-9.96311e-06	-1.35834	-8.81292e-06
-1.3559	-5.21851e-06	-1.3559	-9.82273e-06	-1.3559	-8.6939e-06
-1.35345	-5.16052e-06	-1.35345	-9.69151e-06	-1.35345	-8.58099e-06
-1.35101	-5.09949e-06	-1.35101	-9.55418e-06	-1.35101	-8.46807e-06
-1.34857	-5.04456e-06	-1.34857	-9.426e-06	-1.34857	-8.35821e-06
-1.34613	-4.98657e-06	-1.34613	-9.29783e-06	-1.34613	-8.24529e-06
-1.34369	-4.93164e-06	-1.34369	-9.17576e-06	-1.34369	-8.14153e-06
-1.34125	-4.87976e-06	-1.34125	-9.05064e-06	-1.34125	-8.03777e-06
-1.33881	-4.82788e-06	-1.33881	-8.92857e-06	-1.33881	-7.93096e-06
-1.33636	-4.776e-06	-1.33636	-8.8065e-06	-1.33636	-7.83025e-06
-1.33392	-4.72656e-06	-1.33392	-8.69358e-06	-1.33392	-7.7326e-06
-1.33148	-4.67529e-06	-1.33148	-8.57762e-06	-1.33148	-7.63189e-06
-1.32904	-4.62433e-06	-1.32904	-8.4647e-06	-1.32904	-7.54034e-06
-1.3266	-4.5694e-06	-1.3266	-8.35179e-06	-1.3266	-7.44268e-06
-1.32416	-4.51813e-06	-1.32416	-8.24497e-06	-1.32416	-7.35113e-06
-1.32172	-4.46686e-06	-1.32172	-8.13816e-06	-1.32172	-7.25957e-06
-1.31927	-4.41803e-06	-1.31927	-8.03135e-06	-1.31927	-7.17107e-06
-1.31683	-4.37195e-06	-1.31683	-7.92759e-06	-1.31683	-7.07952e-06
-1.31439	-4.32831e-06	-1.31439	-7.82688e-06	-1.31439	-6.99407e-06
-1.31195	-4.28406e-06	-1.31195	-7.72617e-06	-1.31195	-6.90862e-06
-1.30951	-4.24225e-06	-1.30951	-7.62852e-06	-1.30951	-6.82317e-06
-1.30707	-4.20197e-06	-1.30707	-7.53086e-06	-1.30707	-6.73772e-06
-1.30463	-4.1626e-06	-1.30463	-7.43931e-06	-1.30463	-6.65838e-06
-1.30219	-4.12384e-06	-1.30219	-7.3447e-06	-1.30219	-6.57903e-06
-1.29974	-4.08478e-06	-1.29974	-7.25315e-06	-1.29974	-6.49969e-06
-1.2973	-4.04663e-06	-1.2973	-7.1616e-06	-1.2973	-6.42034e-06
-1.29486	-4.01001e-06	-1.29486	-7.0731e-06	-1.29486	-6.34405e-06
-1.29242	-3.97308e-06	-1.29242	-6.9846e-06	-1.29242	-6.26775e-06
-1.28998	-3.93799e-06	-1.28998	-6.89915e-06	-1.28998	-6.19756e-06
-1.28754	-3.90137e-06	-1.28754	-6.8137e-06	-1.28754	-6.12127e-06
-1.2851	-3.86749e-06	-1.2851	-6.7313e-06	-1.2851	-6.05108e-06
-1.28265	-3.83301e-06	-1.28265	-6.6489e-06	-1.28265	-5.98089e-06
-1.28021	-3.79883e-06	-1.28021	-6.56651e-06	-1.28021	-5.9107e-06
-1.27777	-3.76434e-06	-1.27777	-6.48716e-06	-1.27777	-5.83746e-06
-1.27533	-3.7326e-06	-1.27533	-6.40782e-06	-1.27533	-5.77032e-06
-1.27289	-3.70026e-06	-1.27289	-6.32847e-06	-1.27289	-5.70318e-06
-1.27045	-3.66943e-06	-1.27045	-6.25523e-06	-1.27045	-5.63909e-06
-1.26801	-3.63708e-06	-1.26801	-6.17588e-06	-1.26801	-5.57195e-06
-1.26556	-3.60718e-06	-1.26556	-6.10569e-06	-1.26556	-5.50787e-06
-1.26312	-3.57666e-06	-1.26312	-6.03245e-06	-1.26312	-5.44683e-06
-1.26068	-3.54767e-06	-1.26068	-5.95921e-06	-1.26068	-5.38274e-06
-1.25824	-3.51837e-06	-1.25824	-5.88902e-06	-1.25824	-5.31866e-06
-1.2558	-3.4903e-06	-1.2558	-5.81883e-06	-1.2558	-5.26067e-06
-1.25336	-3.46069e-06	-1.25336	-5.74558e-06	-1.25336	-5.19964e-06
-1.25092	-3.43231e-06	-1.25092	-5.6815e-06	-1.25092	-5.1386e-06
-1.24847	-3.40698e-06	-1.24847	-5.61131e-06	-1.24847	-5.08367e-06
-1.24603	-3.38165e-06	-1.24603	-5.54417e-06	-1.24603	-5.02569e-06
-1.24359	-3.35388e-06	-1.24359	-5.47703e-06	-1.24359	-4.9677e-06
-1.24115	-3.32855e-06	-1.24115	-5.41294e-06	-1.24115	-4.91277e-06
-1.23871	-3.3017e-06	-1.23871	-5.34886e-06	-1.23871	-4.85479e-06
-1.23627	-3.2782e-06	-1.23627	-5.28477e-06	-1.23627	-4.79986e-06
-1.23383	-3.25348e-06	-1.23383	-5.22068e-06	-1.23383	-4.74493e-06
-1.23138	-3.22937e-06	-1.23138	-5.15965e-06	-1.23138	-4.69305e-06
-1.22894	-3.20465e-06	-1.22894	-5.10166e-06	-1.22894	-4.63811e-06
-1.2265	-3.18115e-06	-1.2265	-5.04063e-06	-1.2265	-4.58929e-06
-1.22406	-3.15796e-06	-1.22406	-4.97959e-06	-1.22406	-4.54046e-06
-1.22162	-3.13568e-06	-1.22162	-4.92161e-06	-1.22162	-4.48858e-06
-1.21918	-3.11127e-06	-1.21918	-4.86363e-06	-1.21918	-4.4367e-06
-1.21674	-3.09021e-06	-1.21674	-4.80869e-06	-1.21674	-4.38787e-06
-1.21429	-3.06854e-06	-1.21429	-4.75071e-06	-1.21429	-4.33904e-06
-1.21185	-3.04626e-06	-1.21185	-4.69578e-06	-1.21185	-4.29327e-06
-1.20941	-3.02612e-06	-1.20941	-4.64085e-06	-1.20941	-4.24444e-06
-1.20697	-3.00537e-06	-1.20697	-4.58897e-06	-1.20697	-4.19866e-06
-1.20453	-2.98645e-06	-1.20453	-4.53404e-06	-1.20453	-4.1535e-06
-1.20209	-2.96844e-06	-1.20209	-4.48216e-06	-1.20209	-4.10955e-06
-1.19965	-2.94983e-06	-1.19965	-4.43028e-06	-1.19965	-4.06347e-06
-1.1972	-2.93213e-06	-1.1972	-4.38145e-06	-1.1972	-4.01922e-06
-1.19476	-2.91382e-06	-1.19476	-4.32957e-06	-1.19476	-3.97405e-06
-1.19232	-2.89581e-06	-1.19232	-4.28074e-06	-1.19232	-3.93224e-06
-1.18988	-2.87567e-06	-1.18988	-4.23191e-06	-1.18988	-3.88799e-06
-1.18744	-2.85889e-06	-1.18744	-4.18308e-06	-1.18744	-3.84801e-06
-1.185	-2.83997e-06	-1.185	-4.13731e-06	-1.185	-3.80804e-06
-1.18256	-2.82257e-06	-1.18256	-4.08848e-06	-1.18256	-3.76623e-06
-1.18011	-2.80273e-06	-1.18011	-4.0427e-06	-1.18011	-3.72564e-06
-1.17767	-2.78656e-06	-1.17767	-3.99693e-06	-1.17767	-3.68566e-06
-1.17523	-2.76733e-06	-1.17523	-3.95115e-06	-1.17523	-3.64599e-06
-1.17279	-2.74872e-06	-1.17279	-3.90537e-06	-1.17279	-3.60876e-06
-1.17035	-2.73132e-06	-1.17035	-3.8596e-06	-1.17035	-3.56969e-06
-1.16791	-2.71423e-06	-1.16791	-3.81931e-06	-1.16791	-3.53124e-06
-1.16547	-2.69714e-06	-1.16547	-3.77598e-06	-1.16547	-3.4934e-06
-1.16302	-2.67944e-06	-1.16302	-3.73295e-06	-1.16302	-3.45617e-06
-1.16058	-2.66235e-06	-1.16058	-3.69236e-06	-1.16058	-3.41924e-06
-1.15814	-2.64709e-06	-1.15814	-3.65269e-06	-1.15814	-3.38445e-06
-1.1557	-2.6297e-06	-1.1557	-3.60874e-06	-1.1557	-3.346e-06
-1.15326	-2.61292e-06	-1.15326	-3.56968e-06	-1.15326	-3.31182e-06
-1.15082	-2.59552e-06	-1.15082	-3.53001e-06	-1.15082	-3.2755e-06
-1.14838	-2.57904e-06	-1.14838	-3.49247e-06	-1.14838	-3.24316e-06
-1.14594	-2.56226e-06	-1.14594	-3.45188e-06	-1.14594	-3.20623e-06
-1.14349	-2.5473e-06	-1.14349	-3.41435e-06	-1.14349	-3.17327e-06
-1.14105	-2.53082e-06	-1.14105	-3.37681e-06	-1.14105	-3.13909e-06
-1.13861	-2.51526e-06	-1.13861	-3.33866e-06	-1.13861	-3.10583e-06
-1.13617	-2.49939e-06	-1.13617	-3.30204e-06	-1.13617	-3.07287e-06
-1.13373	-2.48566e-06	-1.13373	-3.26512e-06	-1.13373	-3.04021e-06
-1.13129	-2.4707e-06	-1.13129	-3.22941e-06	-1.13129	-3.00695e-06
-1.12885	-2.45483e-06	-1.12885	-3.1934e-06	-1.12885	-2.97643e-06
-1.1264	-2.44049e-06	-1.1264	-3.158e-06	-1.1264	-2.94652e-06
-1.12396	-2.42615e-06	-1.12396	-3.12351e-06	-1.12396	-2.91326e-06
-1.12152	-2.41089e-06	-1.12152	-3.08903e-06	-1.12152	-2.88396e-06
-1.11908	-2.39838e-06	-1.11908	-3.05607e-06	-1.11908	-2.85436e-06
-1.11664	-2.38251e-06	-1.11664	-3.02097e-06	-1.11664	-2.82323e-06
-1.1142	-2.36908e-06	-1.1142	-2.98893e-06	-1.1142	-2.79455e-06
-1.11176	-2.35382e-06	-1.11176	-2.95506e-06	-1.11176	-2.76556e-06
-1.10931	-2.34222e-06	-1.10931	-2.92271e-06	-1.10931	-2.73595e-06
-1.10687	-2.3288e-06	-1.10687	-2.89005e-06	-1.10687	-2.70879e-06
-1.10443	-2.3172e-06	-1.10443	-2.8574e-06	-1.10443	-2.68072e-06
-1.10199	-2.3056e-06	-1.10199	-2.82444e-06	-1.10199	-2.65173e-06
-1.09955	-2.2934e-06	-1.09955	-2.79392e-06	-1.09955	-2.62548e-06
-1.09711	-2.27997e-06	-1.09711	-2.7628e-06	-1.09711	-2.59771e-06
-1.09467	-2.26929e-06	-1.09467	-2.73289e-06	-1.09467	-2.57177e-06
-1.09222	-2.25739e-06	-1.09222	-2.70176e-06	-1.09222	-2.5443e-06
-1.08978	-2.2464e-06	-1.08978	-2.67124e-06	-1.08978	-2.51806e-06
-1.08734	-2.23328e-06	-1.08734	-2.64073e-06	-1.08734	-2.49303e-06
-1.0849	-2.22198e-06	-1.0849	-2.61082e-06	-1.0849	-2.46801e-06
-1.08246	-2.20978e-06	-1.08246	-2.58122e-06	-1.08246	-2.44298e-06
-1.08002	-2.19971e-06	-1.08002	-2.55253e-06	-1.08002	-2.41796e-06
-1.07758	-2.18933e-06	-1.07758	-2.52445e-06	-1.07758	-2.39294e-06
-1.07513	-2.17773e-06	-1.07513	-2.49699e-06	-1.07513	-2.37005e-06
-1.07269	-2.16644e-06	-1.07269	-2.46983e-06	-1.07269	-2.34472e-06
-1.07025	-2.15729e-06	-1.07025	-2.44297e-06	-1.07025	-2.32336e-06
-1.06781	-2.14661e-06	-1.06781	-2.41703e-06	-1.06781	-2.29864e-06
-1.06537	-2.13531e-06	-1.06537	-2.39018e-06	-1.06537	-2.27636e-06
-1.06293	-2.12372e-06	-1.06293	-2.36515e-06	-1.06293	-2.25164e-06
-1.06049	-2.11243e-06	-1.06049	-2.33982e-06	-1.06049	-2.22875e-06
-1.05804	-2.10114e-06	-1.05804	-2.31327e-06	-1.05804	-2.20586e-06
-1.0556	-2.09167e-06	-1.0556	-2.29069e-06	-1.0556	-2.18298e-06
-1.05316	-2.07977e-06	-1.05316	-2.26658e-06	-1.05316	-2.161e-06
-1.05072	-2.06879e-06	-1.05072	-2.24156e-06	-1.05072	-2.13842e-06
-1.04828	-2.05841e-06	-1.04828	-2.21867e-06	-1.04828	-2.11492e-06
-1.04584	-2.04895e-06	-1.04584	-2.19456e-06	-1.04584	-2.09295e-06
-1.0434	-2.03827e-06	-1.0434	-2.17167e-06	-1.0434	-2.0722e-06
-1.04095	-2.02789e-06	-1.04095	-2.14909e-06	-1.04095	-2.05144e-06
-1.03851	-2.01721e-06	-1.03851	-2.12589e-06	-1.03851	-2.02886e-06
-1.03607	-2.00775e-06	-1.03607	-2.10301e-06	-1.03607	-2.0078e-06
-1.03363	-1.99829e-06	-1.03363	-2.07981e-06	-1.03363	-1.98614e-06
-1.03119	-1.98883e-06	-1.03119	-2.05814e-06	-1.03119	-1.9663e-06
-1.02875	-1.97906e-06	-1.02875	-2.03495e-06	-1.02875	-1.94585e-06
-1.02631	-1.97021e-06	-1.02631	-2.01145e-06	-1.02631	-1.92632e-06
-1.02386	-1.95923e-06	-1.02386	-1.98918e-06	-1.02386	-1.90527e-06
-1.02142	-1.9516e-06	-1.02142	-1.96842e-06	-1.02142	-1.88726e-06
-1.01898	-1.94397e-06	-1.01898	-1.94645e-06	-1.01898	-1.86895e-06
-1.01654	-1.93481e-06	-1.01654	-1.92539e-06	-1.01654	-1.84911e-06
-1.0141	-1.92566e-06	-1.0141	-1.90464e-06	-1.0141	-1.82958e-06
-1.01166	-1.91833e-06	-1.01166	-1.88542e-06	-1.01166	-1.8128e-06
-1.00922	-1.90948e-06	-1.00922	-1.86497e-06	-1.00922	-1.79205e-06
-1.00677	-1.90186e-06	-1.00677	-1.84391e-06	-1.00677	-1.77465e-06
-1.00433	-1.89301e-06	-1.00433	-1.82285e-06	-1.00433	-1.75573e-06
-1.00189	-1.88324e-06	-1.00189	-1.80271e-06	-1.00189	-1.73864e-06
-0.99945	-1.87561e-06	-0.99945	-1.7841e-06	-0.99945	-1.72063e-06
-0.99701	-1.86707e-06	-0.99701	-1.76365e-06	-0.99701	-1.70446e-06
-0.99457	-1.8576e-06	-0.99457	-1.74503e-06	-0.99457	-1.68462e-06
-0.99213	-1.84937e-06	-0.99213	-1.72642e-06	-0.99213	-1.66967e-06
-0.98969	-1.84052e-06	-0.98969	-1.70689e-06	-0.98969	-1.65288e-06
-0.98724	-1.83167e-06	-0.98724	-1.6898e-06	-0.98724	-1.63702e-06
-0.9848	-1.8219e-06	-0.9848	-1.66966e-06	-0.9848	-1.62023e-06
-0.98236	-1.81305e-06	-0.98236	-1.65135e-06	-0.98236	-1.60284e-06
-0.97992	-1.80359e-06	-0.97992	-1.63365e-06	-0.97992	-1.58666e-06
-0.97748	-1.79413e-06	-0.97748	-1.61656e-06	-0.97748	-1.57049e-06
-0.97504	-1.78528e-06	-0.97504	-1.59855e-06	-0.97504	-1.55614e-06
[truncated: 1,014 more rows]
