# Supplementary material for: In-depth chiral sensing capability of C-dots in a biomimetic protein-based hydrogel: a probe for chiral recognition applications
Source: Royal Society of Chemistry journal article supplement (doi:10.1039/d5bm01508a), 2026-01-01
Supplement: d5bm01508a1.zip [file Figure S10.xlsx]

## Sheet: Figure S10(a)
-1.4975	-9.99969e-06	-1.4975	-9.39362e-06	-1.4975	-9.0686e-06
-1.49506	-1.27319e-05	-1.49506	-7.13806e-06	-1.49506	-6.64063e-06
-1.49261	-1.073e-05	-1.49261	-5.85632e-06	-1.49261	-5.32532e-06
-1.49017	-9.39636e-06	-1.49017	-5.06287e-06	-1.49017	-4.52545e-06
-1.48773	-8.45032e-06	-1.48773	-4.48761e-06	-1.48773	-3.97827e-06
-1.48529	-7.71484e-06	-1.48529	-4.07196e-06	-1.48529	-3.56689e-06
-1.48285	-7.13501e-06	-1.48285	-3.73383e-06	-1.48285	-3.25256e-06
-1.48041	-6.66199e-06	-1.48041	-3.46375e-06	-1.48041	-3.00995e-06
-1.47797	-6.26831e-06	-1.47797	-3.24768e-06	-1.47797	-2.80701e-06
-1.47552	-5.93567e-06	-1.47552	-3.05511e-06	-1.47552	-2.63977e-06
-1.47308	-5.65186e-06	-1.47308	-2.89337e-06	-1.47308	-2.49329e-06
-1.47064	-5.41077e-06	-1.47064	-2.75635e-06	-1.47064	-2.36938e-06
-1.4682	-5.17578e-06	-1.4682	-2.63702e-06	-1.4682	-2.26044e-06
-1.46576	-4.98352e-06	-1.46576	-2.5293e-06	-1.46576	-2.17072e-06
-1.46332	-4.80042e-06	-1.46332	-2.43835e-06	-1.46332	-2.08893e-06
-1.46088	-4.64264e-06	-1.46088	-2.35565e-06	-1.46088	-2.01141e-06
-1.45844	-4.49615e-06	-1.45844	-2.27783e-06	-1.45844	-1.94336e-06
-1.45599	-4.36035e-06	-1.45599	-2.21039e-06	-1.45599	-1.8811e-06
-1.45355	-4.22913e-06	-1.45355	-2.15118e-06	-1.45355	-1.82343e-06
-1.45111	-4.11102e-06	-1.45111	-2.099e-06	-1.45111	-1.77307e-06
-1.44867	-3.99872e-06	-1.44867	-2.04102e-06	-1.44867	-1.72516e-06
-1.44623	-3.9032e-06	-1.44623	-1.99036e-06	-1.44623	-1.67938e-06
-1.44379	-3.80219e-06	-1.44379	-1.94672e-06	-1.44379	-1.63727e-06
-1.44135	-3.71338e-06	-1.44135	-1.90399e-06	-1.44135	-1.60126e-06
-1.4389	-3.62579e-06	-1.4389	-1.86798e-06	-1.4389	-1.56311e-06
-1.43646	-3.54675e-06	-1.43646	-1.828e-06	-1.43646	-1.5332e-06
-1.43402	-3.4668e-06	-1.43402	-1.78802e-06	-1.43402	-1.50116e-06
-1.43158	-3.39264e-06	-1.43158	-1.75476e-06	-1.43158	-1.46942e-06
-1.42914	-3.32092e-06	-1.42914	-1.72241e-06	-1.42914	-1.44196e-06
-1.4267	-3.25287e-06	-1.4267	-1.69189e-06	-1.4267	-1.41754e-06
-1.42426	-3.18634e-06	-1.42426	-1.6629e-06	-1.42426	-1.3913e-06
-1.42181	-3.12592e-06	-1.42181	-1.63391e-06	-1.42181	-1.36353e-06
-1.41937	-3.06854e-06	-1.41937	-1.60767e-06	-1.41937	-1.33881e-06
-1.41693	-3.01331e-06	-1.41693	-1.58447e-06	-1.41693	-1.31622e-06
-1.41449	-2.96143e-06	-1.41449	-1.56006e-06	-1.41449	-1.29364e-06
-1.41205	-2.91107e-06	-1.41205	-1.53809e-06	-1.41205	-1.27075e-06
-1.40961	-2.85828e-06	-1.40961	-1.51825e-06	-1.40961	-1.25e-06
-1.40717	-2.80945e-06	-1.40717	-1.49628e-06	-1.40717	-1.22925e-06
-1.40472	-2.76154e-06	-1.40472	-1.47644e-06	-1.40472	-1.21094e-06
-1.40228	-2.71667e-06	-1.40228	-1.46027e-06	-1.40228	-1.19263e-06
-1.39984	-2.67395e-06	-1.39984	-1.44043e-06	-1.39984	-1.17676e-06
-1.3974	-2.63062e-06	-1.3974	-1.4209e-06	-1.3974	-1.15936e-06
-1.39496	-2.58911e-06	-1.39496	-1.40137e-06	-1.39496	-1.14441e-06
-1.39252	-2.55127e-06	-1.39252	-1.39008e-06	-1.39252	-1.13129e-06
-1.39008	-2.51099e-06	-1.39008	-1.36749e-06	-1.39008	-1.11328e-06
-1.38763	-2.4762e-06	-1.38763	-1.35193e-06	-1.38763	-1.10229e-06
-1.38519	-2.43713e-06	-1.38519	-1.33331e-06	-1.38519	-1.08917e-06
-1.38275	-2.40479e-06	-1.38275	-1.31775e-06	-1.38275	-1.07513e-06
-1.38031	-2.37274e-06	-1.38031	-1.30188e-06	-1.38031	-1.05835e-06
-1.37787	-2.33643e-06	-1.37787	-1.29028e-06	-1.37787	-1.0434e-06
-1.37543	-2.29797e-06	-1.37543	-1.27686e-06	-1.37543	-1.03149e-06
-1.37299	-2.26624e-06	-1.37299	-1.26373e-06	-1.37299	-1.0199e-06
-1.37054	-2.23358e-06	-1.37054	-1.25122e-06	-1.37054	-1.00586e-06
-1.3681	-2.20825e-06	-1.3681	-1.23901e-06	-1.3681	-9.95483e-07
-1.36566	-2.17773e-06	-1.36566	-1.22742e-06	-1.36566	-9.85718e-07
-1.36322	-2.14935e-06	-1.36322	-1.21552e-06	-1.36322	-9.74426e-07
-1.36078	-2.12341e-06	-1.36078	-1.20361e-06	-1.36078	-9.6344e-07
-1.35834	-2.09503e-06	-1.35834	-1.19293e-06	-1.35834	-9.54285e-07
-1.3559	-2.0639e-06	-1.3559	-1.18469e-06	-1.3559	-9.4635e-07
-1.35345	-2.03888e-06	-1.35345	-1.17554e-06	-1.35345	-9.3811e-07
-1.35101	-2.01447e-06	-1.35101	-1.16486e-06	-1.35101	-9.2865e-07
-1.34857	-1.9928e-06	-1.34857	-1.1554e-06	-1.34857	-9.19189e-07
-1.34613	-1.96472e-06	-1.34613	-1.1441e-06	-1.34613	-9.05151e-07
-1.34369	-1.94275e-06	-1.34369	-1.13373e-06	-1.34369	-8.96912e-07
-1.34125	-1.91803e-06	-1.34125	-1.12518e-06	-1.34125	-8.87451e-07
-1.33881	-1.89636e-06	-1.33881	-1.11694e-06	-1.33881	-8.77991e-07
-1.33636	-1.87073e-06	-1.33636	-1.10352e-06	-1.33636	-8.70972e-07
-1.33392	-1.8512e-06	-1.33392	-1.09436e-06	-1.33392	-8.63037e-07
-1.33148	-1.82617e-06	-1.33148	-1.08521e-06	-1.33148	-8.54797e-07
-1.32904	-1.80206e-06	-1.32904	-1.07849e-06	-1.32904	-8.49915e-07
-1.3266	-1.78131e-06	-1.3266	-1.06873e-06	-1.3266	-8.40759e-07
-1.32416	-1.75751e-06	-1.32416	-1.05865e-06	-1.32416	-8.34045e-07
-1.32172	-1.73889e-06	-1.32172	-1.05042e-06	-1.32172	-8.28857e-07
-1.31927	-1.71875e-06	-1.31927	-1.03973e-06	-1.31927	-8.23059e-07
-1.31683	-1.70044e-06	-1.31683	-1.03271e-06	-1.31683	-8.1543e-07
-1.31439	-1.68365e-06	-1.31439	-1.02478e-06	-1.31439	-8.08716e-07
-1.31195	-1.66138e-06	-1.31195	-1.01837e-06	-1.31195	-8.01086e-07
-1.30951	-1.64703e-06	-1.30951	-1.01501e-06	-1.30951	-7.95288e-07
-1.30707	-1.62598e-06	-1.30707	-1.00922e-06	-1.30707	-7.87659e-07
-1.30463	-1.61072e-06	-1.30463	-1.00159e-06	-1.30463	-7.8186e-07
-1.30219	-1.59363e-06	-1.30219	-9.91821e-07	-1.30219	-7.76978e-07
-1.29974	-1.5741e-06	-1.29974	-9.84802e-07	-1.29974	-7.71484e-07
-1.2973	-1.5564e-06	-1.2973	-9.75647e-07	-1.2973	-7.65381e-07
-1.29486	-1.54114e-06	-1.29486	-9.68323e-07	-1.29486	-7.58362e-07
-1.29242	-1.52313e-06	-1.29242	-9.6283e-07	-1.29242	-7.52563e-07
-1.28998	-1.51062e-06	-1.28998	-9.56421e-07	-1.28998	-7.47986e-07
-1.28754	-1.49475e-06	-1.28754	-9.48792e-07	-1.28754	-7.40662e-07
-1.2851	-1.48132e-06	-1.2851	-9.42383e-07	-1.2851	-7.37e-07
-1.28265	-1.46515e-06	-1.28265	-9.3689e-07	-1.28265	-7.32422e-07
-1.28021	-1.45264e-06	-1.28021	-9.32617e-07	-1.28021	-7.2937e-07
-1.27777	-1.43433e-06	-1.27777	-9.24377e-07	-1.27777	-7.26013e-07
-1.27533	-1.42242e-06	-1.27533	-9.18274e-07	-1.27533	-7.19604e-07
-1.27289	-1.40717e-06	-1.27289	-9.1156e-07	-1.27289	-7.14111e-07
-1.27045	-1.39496e-06	-1.27045	-9.07288e-07	-1.27045	-7.09229e-07
-1.26801	-1.37878e-06	-1.26801	-9.01794e-07	-1.26801	-7.02209e-07
-1.26556	-1.3678e-06	-1.26556	-8.97522e-07	-1.26556	-6.97021e-07
-1.26312	-1.35559e-06	-1.26312	-8.92029e-07	-1.26312	-6.91833e-07
-1.26068	-1.34125e-06	-1.26068	-8.87146e-07	-1.26068	-6.89697e-07
-1.25824	-1.32935e-06	-1.25824	-8.80127e-07	-1.25824	-6.86035e-07
-1.2558	-1.31439e-06	-1.2558	-8.74023e-07	-1.2558	-6.80847e-07
-1.25336	-1.30188e-06	-1.25336	-8.65784e-07	-1.25336	-6.79321e-07
-1.25092	-1.28632e-06	-1.25092	-8.59985e-07	-1.25092	-6.75049e-07
-1.24847	-1.27563e-06	-1.24847	-8.56323e-07	-1.24847	-6.67419e-07
-1.24603	-1.26526e-06	-1.24603	-8.53271e-07	-1.24603	-6.61011e-07
-1.24359	-1.25336e-06	-1.24359	-8.48389e-07	-1.24359	-6.57043e-07
-1.24115	-1.24268e-06	-1.24115	-8.4259e-07	-1.24115	-6.5094e-07
-1.23871	-1.22925e-06	-1.23871	-8.36487e-07	-1.23871	-6.49109e-07
-1.23627	-1.21674e-06	-1.23627	-8.31909e-07	-1.23627	-6.43005e-07
-1.23383	-1.20514e-06	-1.23383	-8.26721e-07	-1.23383	-6.39038e-07
-1.23138	-1.19568e-06	-1.23138	-8.22754e-07	-1.23138	-6.37207e-07
-1.22894	-1.18256e-06	-1.22894	-8.17261e-07	-1.22894	-6.32629e-07
-1.2265	-1.17218e-06	-1.2265	-8.13599e-07	-1.2265	-6.28967e-07
-1.22406	-1.16211e-06	-1.22406	-8.09326e-07	-1.22406	-6.25305e-07
-1.22162	-1.15234e-06	-1.22162	-8.03833e-07	-1.22162	-6.22253e-07
-1.21918	-1.14044e-06	-1.21918	-7.96509e-07	-1.21918	-6.18591e-07
-1.21674	-1.13037e-06	-1.21674	-7.93457e-07	-1.21674	-6.1676e-07
-1.21429	-1.11969e-06	-1.21429	-7.89795e-07	-1.21429	-6.11572e-07
-1.21185	-1.10992e-06	-1.21185	-7.87354e-07	-1.21185	-6.06689e-07
-1.20941	-1.09833e-06	-1.20941	-7.84607e-07	-1.20941	-6.02722e-07
-1.20697	-1.08948e-06	-1.20697	-7.8125e-07	-1.20697	-5.99365e-07
-1.20453	-1.08002e-06	-1.20453	-7.76672e-07	-1.20453	-5.96008e-07
-1.20209	-1.07147e-06	-1.20209	-7.71484e-07	-1.20209	-5.92041e-07
-1.19965	-1.06049e-06	-1.19965	-7.66907e-07	-1.19965	-5.9021e-07
-1.1972	-1.05194e-06	-1.1972	-7.6355e-07	-1.1972	-5.88074e-07
-1.19476	-1.04218e-06	-1.19476	-7.59277e-07	-1.19476	-5.8197e-07
-1.19232	-1.0321e-06	-1.19232	-7.5592e-07	-1.19232	-5.80139e-07
-1.18988	-1.02203e-06	-1.18988	-7.52258e-07	-1.18988	-5.74646e-07
-1.18744	-1.01227e-06	-1.18744	-7.48291e-07	-1.18744	-5.7312e-07
-1.185	-1.00372e-06	-1.185	-7.44934e-07	-1.185	-5.66711e-07
-1.18256	-9.93652e-07	-1.18256	-7.39746e-07	-1.18256	-5.66101e-07
-1.18011	-9.84497e-07	-1.18011	-7.37915e-07	-1.18011	-5.63965e-07
-1.17767	-9.75342e-07	-1.17767	-7.34253e-07	-1.17767	-5.58472e-07
-1.17523	-9.66492e-07	-1.17523	-7.30896e-07	-1.17523	-5.5603e-07
-1.17279	-9.58862e-07	-1.17279	-7.26013e-07	-1.17279	-5.51147e-07
-1.17035	-9.47571e-07	-1.17035	-7.19604e-07	-1.17035	-5.47485e-07
-1.16791	-9.39636e-07	-1.16791	-7.17163e-07	-1.16791	-5.45349e-07
-1.16547	-9.29565e-07	-1.16547	-7.11975e-07	-1.16547	-5.42908e-07
-1.16302	-9.198e-07	-1.16302	-7.08313e-07	-1.16302	-5.38635e-07
-1.16058	-9.1156e-07	-1.16058	-7.04651e-07	-1.16058	-5.36499e-07
-1.15814	-9.0271e-07	-1.15814	-7.02515e-07	-1.15814	-5.34668e-07
-1.1557	-8.95386e-07	-1.1557	-6.99158e-07	-1.1557	-5.29785e-07
-1.15326	-8.87756e-07	-1.15326	-6.97327e-07	-1.15326	-5.27039e-07
-1.15082	-8.79211e-07	-1.15082	-6.93665e-07	-1.15082	-5.25208e-07
-1.14838	-8.74023e-07	-1.14838	-6.88477e-07	-1.14838	-5.22461e-07
-1.14594	-8.64868e-07	-1.14594	-6.86646e-07	-1.14594	-5.22156e-07
-1.14349	-8.56628e-07	-1.14349	-6.82373e-07	-1.14349	-5.18494e-07
-1.14105	-8.48999e-07	-1.14105	-6.78711e-07	-1.14105	-5.14221e-07
-1.13861	-8.41064e-07	-1.13861	-6.75354e-07	-1.13861	-5.10864e-07
-1.13617	-8.31909e-07	-1.13617	-6.70166e-07	-1.13617	-5.08423e-07
-1.13373	-8.24585e-07	-1.13373	-6.67114e-07	-1.13373	-5.04761e-07
-1.13129	-8.17871e-07	-1.13129	-6.65588e-07	-1.13129	-5.02625e-07
-1.12885	-8.11462e-07	-1.12885	-6.61621e-07	-1.12885	-4.99573e-07
-1.1264	-8.02612e-07	-1.1264	-6.57043e-07	-1.1264	-4.96216e-07
-1.12396	-7.97119e-07	-1.12396	-6.53992e-07	-1.12396	-4.953e-07
-1.12152	-7.9071e-07	-1.12152	-6.51855e-07	-1.12152	-4.93774e-07
-1.11908	-7.8186e-07	-1.11908	-6.48804e-07	-1.11908	-4.91333e-07
-1.11664	-7.73315e-07	-1.11664	-6.44531e-07	-1.11664	-4.86572e-07
-1.1142	-7.68738e-07	-1.1142	-6.43005e-07	-1.1142	-4.83856e-07
-1.11176	-7.61108e-07	-1.11176	-6.39648e-07	-1.11176	-4.82361e-07
-1.10931	-7.53784e-07	-1.10931	-6.36902e-07	-1.10931	-4.80133e-07
-1.10687	-7.45544e-07	-1.10687	-6.33545e-07	-1.10687	-4.776e-07
-1.10443	-7.39441e-07	-1.10443	-6.29578e-07	-1.10443	-4.7345e-07
-1.10199	-7.32727e-07	-1.10199	-6.24084e-07	-1.10199	-4.71588e-07
-1.09955	-7.26013e-07	-1.09955	-6.23779e-07	-1.09955	-4.68689e-07
-1.09711	-7.19299e-07	-1.09711	-6.20728e-07	-1.09711	-4.66919e-07
-1.09467	-7.14417e-07	-1.09467	-6.17371e-07	-1.09467	-4.63989e-07
-1.09222	-7.06787e-07	-1.09222	-6.12793e-07	-1.09222	-4.62463e-07
-1.08978	-7.01599e-07	-1.08978	-6.09131e-07	-1.08978	-4.59473e-07
-1.08734	-6.94885e-07	-1.08734	-6.08215e-07	-1.08734	-4.56604e-07
-1.0849	-6.88477e-07	-1.0849	-6.03943e-07	-1.0849	-4.53247e-07
-1.08246	-6.82068e-07	-1.08246	-6.03027e-07	-1.08246	-4.52393e-07
-1.08002	-6.75354e-07	-1.08002	-5.9906e-07	-1.08002	-4.50348e-07
-1.07758	-6.68335e-07	-1.07758	-5.95703e-07	-1.07758	-4.47205e-07
-1.07513	-6.62842e-07	-1.07513	-5.94177e-07	-1.07513	-4.45129e-07
-1.07269	-6.56738e-07	-1.07269	-5.91736e-07	-1.07269	-4.41681e-07
-1.07025	-6.5155e-07	-1.07025	-5.87463e-07	-1.07025	-4.39972e-07
-1.06781	-6.44836e-07	-1.06781	-5.84106e-07	-1.06781	-4.37012e-07
-1.06537	-6.39648e-07	-1.06537	-5.8136e-07	-1.06537	-4.35303e-07
-1.06293	-6.34155e-07	-1.06293	-5.78613e-07	-1.06293	-4.31519e-07
-1.06049	-6.27747e-07	-1.06049	-5.76172e-07	-1.06049	-4.29626e-07
-1.05804	-6.23779e-07	-1.05804	-5.7312e-07	-1.05804	-4.27216e-07
-1.0556	-6.17065e-07	-1.0556	-5.69763e-07	-1.0556	-4.25629e-07
-1.05316	-6.11267e-07	-1.05316	-5.66101e-07	-1.05316	-4.23584e-07
-1.05072	-6.05774e-07	-1.05072	-5.63354e-07	-1.05072	-4.21783e-07
-1.04828	-6.00891e-07	-1.04828	-5.59692e-07	-1.04828	-4.18762e-07
-1.04584	-5.96313e-07	-1.04584	-5.56946e-07	-1.04584	-4.16168e-07
-1.0434	-5.896e-07	-1.0434	-5.56946e-07	-1.0434	-4.14978e-07
-1.04095	-5.84106e-07	-1.04095	-5.53589e-07	-1.04095	-4.12201e-07
-1.03851	-5.77698e-07	-1.03851	-5.51147e-07	-1.03851	-4.09607e-07
-1.03607	-5.7312e-07	-1.03607	-5.48096e-07	-1.03607	-4.0799e-07
-1.03363	-5.67017e-07	-1.03363	-5.44739e-07	-1.03363	-4.05792e-07
-1.03119	-5.62744e-07	-1.03119	-5.42603e-07	-1.03119	-4.03748e-07
-1.02875	-5.56946e-07	-1.02875	-5.40771e-07	-1.02875	-4.01581e-07
-1.02631	-5.51758e-07	-1.02631	-5.3772e-07	-1.02631	-3.99597e-07
-1.02386	-5.45959e-07	-1.02386	-5.34973e-07	-1.02386	-3.96027e-07
-1.02142	-5.41382e-07	-1.02142	-5.32532e-07	-1.02142	-3.9447e-07
-1.01898	-5.36194e-07	-1.01898	-5.2887e-07	-1.01898	-3.93066e-07
-1.01654	-5.3009e-07	-1.01654	-5.27649e-07	-1.01654	-3.91083e-07
-1.0141	-5.25208e-07	-1.0141	-5.26428e-07	-1.0141	-3.88397e-07
-1.01166	-5.2124e-07	-1.01166	-5.23682e-07	-1.01166	-3.86902e-07
-1.00922	-5.14832e-07	-1.00922	-5.21851e-07	-1.00922	-3.83759e-07
-1.00677	-5.10559e-07	-1.00677	-5.19104e-07	-1.00677	-3.82446e-07
-1.00433	-5.04761e-07	-1.00433	-5.16357e-07	-1.00433	-3.8031e-07
-1.00189	-5.00793e-07	-1.00189	-5.14221e-07	-1.00189	-3.78265e-07
-0.99945	-4.953e-07	-0.99945	-5.11475e-07	-0.99945	-3.76404e-07
-0.99701	-4.89197e-07	-0.99701	-5.09338e-07	-0.99701	-3.73566e-07
-0.99457	-4.84924e-07	-0.99457	-5.05371e-07	-0.99457	-3.70697e-07
-0.99213	-4.80347e-07	-0.99213	-5.00488e-07	-0.99213	-3.69354e-07
-0.98969	-4.74854e-07	-0.98969	-4.97437e-07	-0.98969	-3.66608e-07
-0.98724	-4.70276e-07	-0.98724	-4.9469e-07	-0.98724	-3.64136e-07
-0.9848	-4.65363e-07	-0.9848	-4.92249e-07	-0.9848	-3.61145e-07
-0.98236	-4.59686e-07	-0.98236	-4.91028e-07	-0.98236	-3.59863e-07
-0.97992	-4.55261e-07	-0.97992	-4.87976e-07	-0.97992	-3.57819e-07
-0.97748	-4.51202e-07	-0.97748	-4.83643e-07	-0.97748	-3.56537e-07
-0.97504	-4.46228e-07	-0.97504	-4.82269e-07	-0.97504	-3.54431e-07
-0.9726	-4.42322e-07	-0.9726	-4.79858e-07	-0.9726	-3.5144e-07
-0.97015	-4.38507e-07	-0.97015	-4.7818e-07	-0.97015	-3.50006e-07
-0.96771	-4.3457e-07	-0.96771	-4.74945e-07	-0.96771	-3.48114e-07
-0.96527	-4.30145e-07	-0.96527	-4.71863e-07	-0.96527	-3.4552e-07
-0.96283	-4.2691e-07	-0.96283	-4.68201e-07	-0.96283	-3.43994e-07
-0.96039	-4.22211e-07	-0.96039	-4.67499e-07	-0.96039	-3.41522e-07
-0.95795	-4.19098e-07	-0.95795	-4.64783e-07	-0.95795	-3.39722e-07
-0.95551	-4.14398e-07	-0.95551	-4.62524e-07	-0.95551	-3.36945e-07
-0.95306	-4.10034e-07	-0.95306	-4.60052e-07	-0.95306	-3.35541e-07
-0.95062	-4.05487e-07	-0.95062	-4.58435e-07	-0.95062	-3.33893e-07
-0.94818	-4.01917e-07	-0.94818	-4.56451e-07	-0.94818	-3.32245e-07
-0.94574	-3.97797e-07	-0.94574	-4.52728e-07	-0.94574	-3.29193e-07
-0.9433	-3.93188e-07	-0.9433	-4.50958e-07	-0.9433	-3.27179e-07
-0.94086	-3.88824e-07	-0.94086	-4.48181e-07	-0.94086	-3.25378e-07
-0.93842	-3.85315e-07	-0.93842	-4.4635e-07	-0.93842	-3.23822e-07
-0.93597	-3.81073e-07	-0.93597	-4.43207e-07	-0.93597	-3.22296e-07
-0.93353	-3.7674e-07	-0.93353	-4.42291e-07	-0.93353	-3.2135e-07
-0.93109	-3.72894e-07	-0.93109	-4.40216e-07	-0.93109	-3.18878e-07
-0.92865	-3.68835e-07	-0.92865	-4.37866e-07	-0.92865	-3.15857e-07
-0.92621	-3.6496e-07	-0.92621	-4.3515e-07	-0.92621	-3.15094e-07
-0.92377	-3.60779e-07	-0.92377	-4.33044e-07	-0.92377	-3.12988e-07
-0.92133	-3.5672e-07	-0.92133	-4.30634e-07	-0.92133	-3.11249e-07
-0.91888	-3.52295e-07	-0.91888	-4.28314e-07	-0.91888	-3.0899e-07
-0.91644	-3.48175e-07	-0.91644	-4.26819e-07	-0.91644	-3.06488e-07
-0.914	-3.44391e-07	-0.914	-4.24927e-07	-0.914	-3.06152e-07
-0.91156	-3.41156e-07	-0.91156	-4.22668e-07	-0.91156	-3.04016e-07
-0.90912	-3.37555e-07	-0.90912	-4.20074e-07	-0.90912	-3.02368e-07
-0.90668	-3.34595e-07	-0.90668	-4.18121e-07	-0.90668	-3.00385e-07
-0.90424	-3.3078e-07	-0.90424	-4.15955e-07	-0.90424	-2.98889e-07
-0.90179	-3.27026e-07	-0.90179	-4.14825e-07	-0.90179	-2.97913e-07
-0.89935	-3.23608e-07	-0.89935	-4.12994e-07	-0.89935	-2.95929e-07
-0.89691	-3.20007e-07	-0.89691	-4.11743e-07	-0.89691	-2.94098e-07
-0.89447	-3.16528e-07	-0.89447	-4.09912e-07	-0.89447	-2.92786e-07
-0.89203	-3.12866e-07	-0.89203	-4.07806e-07	-0.89203	-2.91199e-07
-0.88959	-3.08838e-07	-0.88959	-4.05731e-07	-0.88959	-2.88788e-07
-0.88715	-3.05603e-07	-0.88715	-4.03534e-07	-0.88715	-2.87628e-07
-0.8847	-3.01849e-07	-0.8847	-4.01825e-07	-0.8847	-2.86224e-07
-0.88226	-2.98309e-07	-0.88226	-3.99231e-07	-0.88226	-2.84119e-07
-0.87982	-2.94586e-07	-0.87982	-3.98438e-07	-0.87982	-2.82501e-07
-0.87738	-2.91046e-07	-0.87738	-3.96637e-07	-0.87738	-2.80457e-07
-0.87494	-2.88055e-07	-0.87494	-3.9505e-07	-0.87494	-2.79236e-07
-0.8725	-2.83844e-07	-0.8725	-3.92059e-07	-0.8725	-2.7774e-07
-0.87006	-2.80609e-07	-0.87006	-3.88672e-07	-0.87006	-2.76154e-07
-0.86761	-2.76764e-07	-0.86761	-3.86047e-07	-0.86761	-2.73804e-07
-0.86517	-2.73987e-07	-0.86517	-3.8385e-07	-0.86517	-2.72675e-07
-0.86273	-2.70538e-07	-0.86273	-3.81653e-07	-0.86273	-2.71118e-07
-0.86029	-2.67365e-07	-0.86029	-3.79669e-07	-0.86029	-2.69623e-07
-0.85785	-2.63916e-07	-0.85785	-3.76862e-07	-0.85785	-2.68127e-07
-0.85541	-2.61597e-07	-0.85541	-3.75092e-07	-0.85541	-2.6709e-07
-0.85297	-2.58026e-07	-0.85297	-3.73108e-07	-0.85297	-2.65289e-07
-0.85052	-2.54883e-07	-0.85052	-3.71033e-07	-0.85052	-2.63336e-07
-0.84808	-2.51495e-07	-0.84808	-3.68927e-07	-0.84808	-2.61841e-07
-0.84564	-2.48138e-07	-0.84564	-3.6731e-07	-0.84564	-2.60406e-07
-0.8432	-2.45117e-07	-0.8432	-3.65295e-07	-0.8432	-2.58881e-07
-0.84076	-2.41669e-07	-0.84076	-3.62885e-07	-0.84076	-2.5769e-07
-0.83832	-2.38281e-07	-0.83832	-3.61511e-07	-0.83832	-2.55554e-07
-0.83588	-2.35199e-07	-0.83588	-3.59131e-07	-0.83588	-2.54242e-07
-0.83344	-2.31659e-07	-0.83344	-3.57086e-07	-0.83344	-2.51282e-07
-0.83099	-2.29279e-07	-0.83099	-3.56415e-07	-0.83099	-2.51404e-07
-0.82855	-2.26257e-07	-0.82855	-3.55347e-07	-0.82855	-2.4939e-07
-0.82611	-2.23175e-07	-0.82611	-3.53271e-07	-0.82611	-2.4826e-07
-0.82367	-2.20215e-07	-0.82367	-3.51013e-07	-0.82367	-2.46887e-07
-0.82123	-2.17804e-07	-0.82123	-3.48907e-07	-0.82123	-2.45117e-07
-0.81879	-2.15118e-07	-0.81879	-3.46954e-07	-0.81879	-2.43927e-07
-0.81635	-2.12097e-07	-0.81635	-3.45093e-07	-0.81635	-2.4231e-07
-0.8139	-2.09595e-07	-0.8139	-3.44574e-07	-0.8139	-2.40601e-07
-0.81146	-2.07306e-07	-0.81146	-3.40759e-07	-0.81146	-2.39166e-07
-0.80902	-2.04895e-07	-0.80902	-3.39203e-07	-0.80902	-2.3822e-07
-0.80658	-2.02515e-07	-0.80658	-3.38165e-07	-0.80658	-2.36816e-07
-0.80414	-1.9928e-07	-0.80414	-3.35938e-07	-0.80414	-2.35382e-07
-0.8017	-1.97235e-07	-0.8017	-3.34534e-07	-0.8017	-2.33429e-07
-0.79926	-1.94489e-07	-0.79926	-3.3316e-07	-0.79926	-2.32697e-07
-0.79681	-1.92108e-07	-0.79681	-3.31421e-07	-0.79681	-2.31232e-07
-0.79437	-1.90308e-07	-0.79437	-3.29376e-07	-0.79437	-2.30072e-07
-0.79193	-1.88232e-07	-0.79193	-3.28308e-07	-0.79193	-2.28638e-07
-0.78949	-1.85822e-07	-0.78949	-3.27179e-07	-0.78949	-2.27386e-07
-0.78705	-1.83289e-07	-0.78705	-3.25714e-07	-0.78705	-2.25861e-07
-0.78461	-1.80939e-07	-0.78461	-3.23334e-07	-0.78461	-2.24731e-07
-0.78217	-1.79169e-07	-0.78217	-3.21289e-07	-0.78217	-2.22351e-07
-0.77972	-1.77216e-07	-0.77972	-3.20068e-07	-0.77972	-2.20825e-07
-0.77728	-1.74652e-07	-0.77728	-3.18146e-07	-0.77728	-2.2052e-07
-0.77484	-1.72546e-07	-0.77484	-3.1662e-07	-0.77484	-2.18811e-07
-0.7724	-1.70685e-07	-0.7724	-3.15735e-07	-0.7724	-2.17346e-07
-0.76996	-1.68671e-07	-0.76996	-3.14056e-07	-0.76996	-2.16492e-07
-0.76752	-1.67053e-07	-0.76752	-3.12317e-07	-0.76752	-2.15454e-07
-0.76508	-1.65009e-07	-0.76508	-3.10364e-07	-0.76508	-2.13898e-07
-0.76263	-1.63208e-07	-0.76263	-3.08563e-07	-0.76263	-2.11975e-07
-0.76019	-1.61133e-07	-0.76019	-3.07312e-07	-0.76019	-2.11609e-07
-0.75775	-1.59515e-07	-0.75775	-3.06152e-07	-0.75775	-2.09961e-07
-0.75531	-1.57745e-07	-0.75531	-3.0426e-07	-0.75531	-2.08862e-07
-0.75287	-1.56067e-07	-0.75287	-3.0304e-07	-0.75287	-2.07672e-07
-0.75043	-1.54449e-07	-0.75043	-3.01086e-07	-0.75043	-2.06146e-07
-0.74799	-1.52679e-07	-0.74799	-2.99774e-07	-0.74799	-2.05353e-07
-0.74554	-1.50848e-07	-0.74554	-2.9776e-07	-0.74554	-2.03766e-07
-0.7431	-1.49414e-07	-0.7431	-2.95685e-07	-0.7431	-2.02301e-07
-0.74066	-1.47949e-07	-0.74066	-2.94128e-07	-0.74066	-2.00958e-07
-0.73822	-1.46149e-07	-0.73822	-2.92847e-07	-0.73822	-1.99829e-07
-0.73578	-1.44562e-07	-0.73578	-2.90558e-07	-0.73578	-1.99097e-07
-0.73334	-1.427e-07	-0.73334	-2.89001e-07	-0.73334	-1.97479e-07
-0.7309	-1.40564e-07	-0.7309	-2.87354e-07	-0.7309	-1.95953e-07
-0.72845	-1.39008e-07	-0.72845	-2.86713e-07	-0.72845	-1.94824e-07
-0.72601	-1.37726e-07	-0.72601	-2.84851e-07	-0.72601	-1.93207e-07
-0.72357	-1.36383e-07	-0.72357	-2.83569e-07	-0.72357	-1.92566e-07
-0.72113	-1.3504e-07	-0.72113	-2.83386e-07	-0.72113	-1.91071e-07
-0.71869	-1.33881e-07	-0.71869	-2.82135e-07	-0.71869	-1.90033e-07
-0.71625	-1.32355e-07	-0.71625	-2.80914e-07	-0.71625	-1.8869e-07
-0.71381	-1.3092e-07	-0.71381	-2.79602e-07	-0.71381	-1.87714e-07
-0.71136	-1.29364e-07	-0.71136	-2.77496e-07	-0.71136	-1.86035e-07
-0.70892	-1.28387e-07	-0.70892	-2.75024e-07	-0.70892	-1.84906e-07
-0.70648	-1.2677e-07	-0.70648	-2.742e-07	-0.70648	-1.83655e-07
-0.70404	-1.25305e-07	-0.70404	-2.72888e-07	-0.70404	-1.82465e-07
-0.7016	-1.23627e-07	-0.7016	-2.72156e-07	-0.7016	-1.81183e-07
-0.69916	-1.22437e-07	-0.69916	-2.70996e-07	-0.69916	-1.79871e-07
-0.69672	-1.21094e-07	-0.69672	-2.69653e-07	-0.69672	-1.7868e-07
-0.69427	-1.19965e-07	-0.69427	-2.67365e-07	-0.69427	-1.78009e-07
-0.69183	-1.18622e-07	-0.69183	-2.65228e-07	-0.69183	-1.77094e-07
-0.68939	-1.17493e-07	-0.68939	-2.63245e-07	-0.68939	-1.75598e-07
-0.68695	-1.16272e-07	-0.68695	-2.61932e-07	-0.68695	-1.74561e-07
-0.68451	-1.14929e-07	-0.68451	-2.60193e-07	-0.68451	-1.73401e-07
-0.68207	-1.13831e-07	-0.68207	-2.59033e-07	-0.68207	-1.72272e-07
-0.67963	-1.12701e-07	-0.67963	-2.5766e-07	-0.67963	-1.70624e-07
-0.67719	-1.11755e-07	-0.67719	-2.56104e-07	-0.67719	-1.69464e-07
-0.67474	-1.1084e-07	-0.67474	-2.54517e-07	-0.67474	-1.68182e-07
-0.6723	-1.09772e-07	-0.6723	-2.52777e-07	-0.6723	-1.67145e-07
-0.66986	-1.0907e-07	-0.66986	-2.5174e-07	-0.66986	-1.66229e-07
-0.66742	-1.07544e-07	-0.66742	-2.50275e-07	-0.66742	-1.6449e-07
-0.66498	-1.06659e-07	-0.66498	-2.49115e-07	-0.66498	-1.6391e-07
-0.66254	-1.05408e-07	-0.66254	-2.48322e-07	-0.66254	-1.62689e-07
-0.6601	-1.04401e-07	-0.6601	-2.46216e-07	-0.6601	-1.61682e-07
-0.65765	-1.03241e-07	-0.65765	-2.45911e-07	-0.65765	-1.60461e-07
-0.65521	-1.02112e-07	-0.65521	-2.44232e-07	-0.65521	-1.59271e-07
-0.65277	-1.01196e-07	-0.65277	-2.42004e-07	-0.65277	-1.58661e-07
-0.65033	-1.00433e-07	-0.65033	-2.41058e-07	-0.65033	-1.57257e-07
-0.64789	-9.96399e-08	-0.64789	-2.39014e-07	-0.64789	-1.55762e-07
-0.64545	-9.88159e-08	-0.64545	-2.37976e-07	-0.64545	-1.55182e-07
-0.64301	-9.78699e-08	-0.64301	-2.3642e-07	-0.64301	-1.53931e-07
-0.64056	-9.68018e-08	-0.64056	-2.34497e-07	-0.64056	-1.53107e-07
-0.63812	-9.59473e-08	-0.63812	-2.32666e-07	-0.63812	-1.5213e-07
-0.63568	-9.48486e-08	-0.63568	-2.31018e-07	-0.63568	-1.50482e-07
-0.63324	-9.39636e-08	-0.63324	-2.29553e-07	-0.63324	-1.49048e-07
-0.6308	-9.29565e-08	-0.6308	-2.28241e-07	-0.6308	-1.47919e-07
-0.62836	-9.18274e-08	-0.62836	-2.26715e-07	-0.62836	-1.46729e-07
-0.62592	-9.10034e-08	-0.62592	-2.25739e-07	-0.62592	-1.4563e-07
-0.62347	-9.00269e-08	-0.62347	-2.24152e-07	-0.62347	-1.44775e-07
-0.62103	-8.92029e-08	-0.62103	-2.22778e-07	-0.62103	-1.43372e-07
-0.61859	-8.83789e-08	-0.61859	-2.21558e-07	-0.61859	-1.42365e-07
-0.61615	-8.75549e-08	-0.61615	-2.20184e-07	-0.61615	-1.41571e-07
-0.61371	-8.64868e-08	-0.61371	-2.18414e-07	-0.61371	-1.40411e-07
-0.61127	-8.56628e-08	-0.61127	-2.16064e-07	-0.61127	-1.39862e-07
-0.60883	-8.47778e-08	-0.60883	-2.15057e-07	-0.60883	-1.38428e-07
-0.60638	-8.40454e-08	-0.60638	-2.13684e-07	-0.60638	-1.37756e-07
-0.60394	-8.3313e-08	-0.60394	-2.12738e-07	-0.60394	-1.36353e-07
-0.6015	-8.25806e-08	-0.6015	-2.11029e-07	-0.6015	-1.35559e-07
-0.59906	-8.13904e-08	-0.59906	-2.09778e-07	-0.59906	-1.34613e-07
-0.59662	-8.05664e-08	-0.59662	-2.08557e-07	-0.59662	-1.33514e-07
-0.59418	-7.98035e-08	-0.59418	-2.07123e-07	-0.59418	-1.32385e-07
-0.59174	-7.90405e-08	-0.59174	-2.05841e-07	-0.59174	-1.31622e-07
-0.58929	-7.80945e-08	-0.58929	-2.04376e-07	-0.58929	-1.30646e-07
-0.58685	-7.7301e-08	-0.58685	-2.03064e-07	-0.58685	-1.28845e-07
-0.58441	-7.64771e-08	-0.58441	-2.01752e-07	-0.58441	-1.28326e-07
-0.58197	-7.5592e-08	-0.58197	-2.00226e-07	-0.58197	-1.27014e-07
-0.57953	-7.4646e-08	-0.57953	-1.98395e-07	-0.57953	-1.26099e-07
-0.57709	-7.39746e-08	-0.57709	-1.97205e-07	-0.57709	-1.25214e-07
-0.57465	-7.32422e-08	-0.57465	-1.95831e-07	-0.57465	-1.24481e-07
-0.5722	-7.24792e-08	-0.5722	-1.94427e-07	-0.5722	-1.23962e-07
-0.56976	-7.17468e-08	-0.56976	-1.93054e-07	-0.56976	-1.22803e-07
-0.56732	-7.11365e-08	-0.56732	-1.92413e-07	-0.56732	-1.21552e-07
-0.56488	-7.05566e-08	-0.56488	-1.91132e-07	-0.56488	-1.20514e-07
-0.56244	-6.98547e-08	-0.56244	-1.89758e-07	-0.56244	-1.19202e-07
-0.56	-6.91833e-08	-0.56	-1.8811e-07	-0.56	-1.17798e-07
-0.55756	-6.84204e-08	-0.55756	-1.86951e-07	-0.55756	-1.16821e-07
-0.55511	-6.75659e-08	-0.55511	-1.85791e-07	-0.55511	-1.16302e-07
-0.55267	-6.67419e-08	-0.55267	-1.84418e-07	-0.55267	-1.15662e-07
-0.55023	-6.604e-08	-0.55023	-1.83014e-07	-0.55023	-1.14197e-07
-0.54779	-6.52771e-08	-0.54779	-1.81702e-07	-0.54779	-1.13129e-07
-0.54535	-6.46057e-08	-0.54535	-1.80176e-07	-0.54535	-1.1203e-07
-0.54291	-6.38733e-08	-0.54291	-1.78772e-07	-0.54291	-1.10626e-07
-0.54047	-6.32019e-08	-0.54047	-1.7807e-07	-0.54047	-1.09436e-07
-0.53802	-6.27136e-08	-0.53802	-1.76239e-07	-0.53802	-1.08826e-07
-0.53558	-6.20728e-08	-0.53558	-1.75476e-07	-0.53558	-1.0791e-07
-0.53314	-6.14014e-08	-0.53314	-1.73859e-07	-0.53314	-1.07605e-07
-0.5307	-6.073e-08	-0.5307	-1.72913e-07	-0.5307	-1.06384e-07
-0.52826	-5.9845e-08	-0.52826	-1.71021e-07	-0.52826	-1.05774e-07
-0.52582	-5.91431e-08	-0.52582	-1.70074e-07	-0.52582	-1.0437e-07
-0.52338	-5.85632e-08	-0.52338	-1.69403e-07	-0.52338	-1.03668e-07
-0.52094	-5.8075e-08	-0.52094	-1.67328e-07	-0.52094	-1.02325e-07
-0.51849	-5.7312e-08	-0.51849	-1.66351e-07	-0.51849	-1.01898e-07
-0.51605	-5.64575e-08	-0.51605	-1.64948e-07	-0.51605	-1.00708e-07
-0.51361	-5.58167e-08	-0.51361	-1.63086e-07	-0.51361	-9.99756e-08
-0.51117	-5.53894e-08	-0.51117	-1.62354e-07	-0.51117	-9.90601e-08
-0.50873	-5.4657e-08	-0.50873	-1.60553e-07	-0.50873	-9.77173e-08
-0.50629	-5.39551e-08	-0.50629	-1.59607e-07	-0.50629	-9.67102e-08
-0.50385	-5.31311e-08	-0.50385	-1.58325e-07	-0.50385	-9.59778e-08
-0.5014	-5.25208e-08	-0.5014	-1.57074e-07	-0.5014	-9.49402e-08
-0.49896	-5.2002e-08	-0.49896	-1.55518e-07	-0.49896	-9.39941e-08
-0.49652	-5.13e-08	-0.49652	-1.54175e-07	-0.49652	-9.2926e-08
-0.49408	-5.05981e-08	-0.49408	-1.52863e-07	-0.49408	-9.18579e-08
-0.49164	-5.00488e-08	-0.49164	-1.5155e-07	-0.49164	-9.07593e-08
-0.4892	-4.92859e-08	-0.4892	-1.50421e-07	-0.4892	-8.97217e-08
-0.48676	-4.88892e-08	-0.48676	-1.49231e-07	-0.48676	-8.85925e-08
-0.48431	-4.81567e-08	-0.48431	-1.4798e-07	-0.48431	-8.75854e-08
-0.48187	-4.76074e-08	-0.48187	-1.46454e-07	-0.48187	-8.6731e-08
-0.47943	-4.6875e-08	-0.47943	-1.44684e-07	-0.47943	-8.5907e-08
-0.47699	-4.62646e-08	-0.47699	-1.43524e-07	-0.47699	-8.5083e-08
-0.47455	-4.55627e-08	-0.47455	-1.4209e-07	-0.47455	-8.40759e-08
-0.47211	-4.47388e-08	-0.47211	-1.40747e-07	-0.47211	-8.29163e-08
-0.46967	-4.41589e-08	-0.46967	-1.39709e-07	-0.46967	-8.1543e-08
-0.46722	-4.34875e-08	-0.46722	-1.38824e-07	-0.46722	-8.0658e-08
-0.46478	-4.26941e-08	-0.46478	-1.37604e-07	-0.46478	-7.95288e-08
-0.46234	-4.21448e-08	-0.46234	-1.36353e-07	-0.46234	-7.85217e-08
-0.4599	-4.15649e-08	-0.4599	-1.3501e-07	-0.4599	-7.8186e-08
-0.45746	-4.10461e-08	-0.45746	-1.33759e-07	-0.45746	-7.68738e-08
-0.45502	-4.05884e-08	-0.45502	-1.32721e-07	-0.45502	-7.62634e-08
-0.45258	-3.9917e-08	-0.45258	-1.30768e-07	-0.45258	-7.52563e-08
-0.45013	-3.92761e-08	-0.45013	-1.29578e-07	-0.45013	-7.42798e-08
-0.44769	-3.88184e-08	-0.44769	-1.27899e-07	-0.44769	-7.31812e-08
-0.44525	-3.8147e-08	-0.44525	-1.26892e-07	-0.44525	-7.2052e-08
-0.44281	-3.72925e-08	-0.44281	-1.25214e-07	-0.44281	-7.14417e-08
-0.44037	-3.66821e-08	-0.44037	-1.24207e-07	-0.44037	-7.04346e-08
-0.43793	-3.60718e-08	-0.43793	-1.23077e-07	-0.43793	-6.91223e-08
-0.43549	-3.53088e-08	-0.43549	-1.21857e-07	-0.43549	-6.79321e-08
-0.43304	-3.45459e-08	-0.43304	-1.20453e-07	-0.43304	-6.6803e-08
-0.4306	-3.3905e-08	-0.4306	-1.19141e-07	-0.4306	-6.56433e-08
-0.42816	-3.32336e-08	-0.42816	-1.17798e-07	-0.42816	-6.45447e-08
-0.42572	-3.26233e-08	-0.42572	-1.16425e-07	-0.42572	-6.37512e-08
-0.42328	-3.2074e-08	-0.42328	-1.1557e-07	-0.42328	-6.31104e-08
-0.42084	-3.15247e-08	-0.42084	-1.14197e-07	-0.42084	-6.21338e-08
-0.4184	-3.08533e-08	-0.4184	-1.12854e-07	-0.4184	-6.1676e-08
-0.41595	-3.05481e-08	-0.41595	-1.11816e-07	-0.41595	-6.12488e-08
-0.41351	-2.99072e-08	-0.41351	-1.10229e-07	-0.41351	-6.00891e-08
-0.41107	-2.93884e-08	-0.41107	-1.09283e-07	-0.41107	-5.88989e-08
-0.40863	-2.85339e-08	-0.40863	-1.08093e-07	-0.40863	-5.78918e-08
-0.40619	-2.78931e-08	-0.40619	-1.06781e-07	-0.40619	-5.69153e-08
-0.40375	-2.73438e-08	-0.40375	-1.05621e-07	-0.40375	-5.60608e-08
-0.40131	-2.66418e-08	-0.40131	-1.04218e-07	-0.40131	-5.52979e-08
-0.39886	-2.6001e-08	-0.39886	-1.02875e-07	-0.39886	-5.42908e-08
-0.39642	-2.55737e-08	-0.39642	-1.0141e-07	-0.39642	-5.34668e-08
-0.39398	-2.49908e-08	-0.39398	-1.00433e-07	-0.39398	-5.21851e-08
-0.39154	-2.43683e-08	-0.39154	-9.95178e-08	-0.39154	-5.13e-08
-0.3891	-2.37946e-08	-0.3891	-9.79919e-08	-0.3891	-5.05676e-08
-0.38666	-2.31934e-08	-0.38666	-9.65881e-08	-0.38666	-5.02014e-08
-0.38422	-2.25952e-08	-0.38422	-9.57336e-08	-0.38422	-4.87671e-08
-0.38177	-2.20337e-08	-0.38177	-9.44214e-08	-0.38177	-4.79431e-08
-0.37933	-2.14294e-08	-0.37933	-9.2926e-08	-0.37933	-4.70886e-08
-0.37689	-2.09808e-08	-0.37689	-9.19189e-08	-0.37689	-4.62952e-08
-0.37445	-2.02576e-08	-0.37445	-9.10339e-08	-0.37445	-4.54102e-08
-0.37201	-1.95404e-08	-0.37201	-9.01184e-08	-0.37201	-4.41589e-08
-0.36957	-1.88019e-08	-0.36957	-8.87451e-08	-0.36957	-4.3396e-08
-0.36713	-1.82159e-08	-0.36713	-8.73108e-08	-0.36713	-4.27856e-08
-0.36469	-1.75995e-08	-0.36469	-8.60901e-08	-0.36469	-4.17786e-08
-0.36224	-1.69189e-08	-0.36224	-8.43811e-08	-0.36224	-4.11682e-08
-0.3598	-1.62659e-08	-0.3598	-8.30383e-08	-0.3598	-4.00696e-08
-0.35736	-1.55304e-08	-0.35736	-8.18481e-08	-0.35736	-3.91846e-08
-0.35492	-1.47247e-08	-0.35492	-8.05359e-08	-0.35492	-3.83911e-08
-0.35248	-1.42151e-08	-0.35248	-7.95593e-08	-0.35248	-3.78418e-08
-0.35004	-1.34491e-08	-0.35004	-7.79724e-08	-0.35004	-3.70789e-08
-0.3476	-1.28387e-08	-0.3476	-7.69348e-08	-0.3476	-3.61633e-08
-0.34515	-1.21338e-08	-0.34515	-7.58057e-08	-0.34515	-3.54614e-08
-0.34271	-1.16364e-08	-0.34271	-7.46155e-08	-0.34271	-3.47595e-08
-0.34027	-1.09619e-08	-0.34027	-7.34863e-08	-0.34027	-3.35999e-08
-0.33783	-1.03943e-08	-0.33783	-7.21741e-08	-0.33783	-3.2959e-08
-0.33539	-9.57642e-09	-0.33539	-7.07397e-08	-0.33539	-3.22571e-08
-0.33295	-8.95081e-09	-0.33295	-6.9519e-08	-0.33295	-3.16162e-08
-0.33051	-8.27942e-09	-0.33051	-6.82678e-08	-0.33051	-3.07159e-08
-0.32806	-7.41882e-09	-0.32806	-6.71387e-08	-0.32806	-2.97852e-08
-0.32562	-6.65588e-09	-0.32562	-6.55518e-08	-0.32562	-2.87903e-08
-0.32318	-6.06384e-09	-0.32318	-6.42395e-08	-0.32318	-2.77588e-08
-0.32074	-5.18799e-09	-0.32074	-6.28052e-08	-0.32074	-2.72766e-08
-0.3183	-4.44641e-09	-0.3183	-6.19812e-08	-0.3183	-2.68036e-08
-0.31586	-3.50342e-09	-0.31586	-6.10657e-08	-0.31586	-2.61444e-08
-0.31342	-2.78625e-09	-0.31342	-5.99365e-08	-0.31342	-2.55737e-08
-0.31097	-2.11792e-09	-0.31097	-5.89294e-08	-0.31097	-2.46521e-08
-0.30853	-1.57776e-09	-0.30853	-5.78918e-08	-0.30853	-2.36725e-08
-0.30609	-8.27026e-10	-0.30609	-5.70374e-08	-0.30609	-2.30469e-08
-0.30365	-1.06812e-10	-0.30365	-5.58167e-08	-0.30365	-2.26685e-08
-0.30121	5.21851e-10	-0.30121	-5.48096e-08	-0.30121	-2.18506e-08
-0.29877	1.14746e-09	-0.29877	-5.38025e-08	-0.29877	-2.14661e-08
-0.29633	2.01721e-09	-0.29633	-5.24292e-08	-0.29633	-2.08069e-08
-0.29388	2.49634e-09	-0.29388	-5.19104e-08	-0.29388	-2.0224e-08
-0.29144	3.125e-09	-0.29144	-5.06592e-08	-0.29144	-1.89209e-08
-0.289	3.51563e-09	-0.289	-4.9469e-08	-0.289	-1.79962e-08
-0.28656	4.08936e-09	-0.28656	-4.85535e-08	-0.28656	-1.75903e-08
-0.28412	4.44336e-09	-0.28412	-4.74548e-08	-0.28412	-1.75507e-08
-0.28168	5.27954e-09	-0.28168	-4.63257e-08	-0.28168	-1.69495e-08
-0.27924	5.95398e-09	-0.27924	-4.54407e-08	-0.27924	-1.60767e-08
-0.27679	6.56433e-09	-0.27679	-4.44031e-08	-0.27679	-1.49719e-08
-0.27435	7.14111e-09	-0.27435	-4.37012e-08	-0.27435	-1.41479e-08
-0.27191	7.724e-09	-0.27191	-4.27551e-08	-0.27191	-1.39038e-08
-0.26947	8.19702e-09	-0.26947	-4.17175e-08	-0.26947	-1.35986e-08
-0.26703	9.2041e-09	-0.26703	-4.06799e-08	-0.26703	-1.30554e-08
-0.26459	9.75952e-09	-0.26459	-3.97644e-08	-0.26459	-1.23688e-08
-0.26215	9.90906e-09	-0.26215	-3.86963e-08	-0.26215	-1.15723e-08
-0.2597	1.06598e-08	-0.2597	-3.77502e-08	-0.2597	-1.06812e-08
-0.25726	1.13739e-08	-0.25726	-3.67432e-08	-0.25726	-9.80835e-09
-0.25482	1.17188e-08	-0.25482	-3.56445e-08	-0.25482	-9.17664e-09
-0.25238	1.23535e-08	-0.25238	-3.45154e-08	-0.25238	-8.14514e-09
-0.24994	1.27289e-08	-0.24994	-3.36304e-08	-0.24994	-7.1167e-09
-0.2475	1.33667e-08	-0.2475	-3.26843e-08	-0.2475	-6.20728e-09
-0.24506	1.40045e-08	-0.24506	-3.18024e-08	-0.24506	-5.52979e-09
-0.24261	1.4566e-08	-0.24261	-3.07068e-08	-0.24261	-4.95911e-09
-0.24017	1.50452e-08	-0.24017	-3.01056e-08	-0.24017	-4.65393e-09
-0.23773	1.55884e-08	-0.23773	-2.91077e-08	-0.23773	-4.01001e-09
-0.23529	1.61957e-08	-0.23529	-2.82654e-08	-0.23529	-3.31726e-09
-0.23285	1.69617e-08	-0.23285	-2.73254e-08	-0.23285	-2.66113e-09
-0.23041	1.78284e-08	-0.23041	-2.63031e-08	-0.23041	-2.26135e-09
-0.22797	1.84662e-08	-0.22797	-2.53876e-08	-0.22797	-1.62048e-09
-0.22552	1.89667e-08	-0.22552	-2.44812e-08	-0.22552	-1.08643e-09
-0.22308	1.95313e-08	-0.22308	-2.3407e-08	-0.22308	-3.479e-10
-0.22064	2.02057e-08	-0.22064	-2.24274e-08	-0.22064	2.44141e-10
-0.2182	2.08832e-08	-0.2182	-2.13837e-08	-0.2182	9.09424e-10
-0.21576	2.14661e-08	-0.21576	-2.06787e-08	-0.21576	1.5564e-09
-0.21332	2.2168e-08	-0.21332	-1.96106e-08	-0.21332	2.30103e-09
-0.21088	2.24609e-08	-0.21088	-1.87714e-08	-0.21088	2.6947e-09
-0.20844	2.28668e-08	-0.20844	-1.78589e-08	-0.20844	3.24097e-09
-0.20599	2.35901e-08	-0.20599	-1.69312e-08	-0.20599	4.51965e-09
-0.20355	2.39258e-08	-0.20355	-1.61285e-08	-0.20355	4.58984e-09
-0.20111	2.41882e-08	-0.20111	-1.53687e-08	-0.20111	4.61121e-09
-0.19867	2.4292e-08	-0.19867	-1.44562e-08	-0.19867	5.22461e-09
-0.19623	2.48108e-08	-0.19623	-1.37665e-08	-0.19623	6.06384e-09
-0.19379	2.52686e-08	-0.19379	-1.28021e-08	-0.19379	6.84814e-09
-0.19135	2.59094e-08	-0.19135	-1.19812e-08	-0.19135	7.33948e-09
-0.1889	2.65808e-08	-0.1889	-1.10504e-08	-0.1889	7.65381e-09
-0.18646	2.70081e-08	-0.18646	-1.01135e-08	-0.18646	8.03833e-09
-0.18402	2.73743e-08	-0.18402	-9.21631e-09	-0.18402	8.54187e-09
-0.18158	2.80151e-08	-0.18158	-8.45642e-09	-0.18158	8.98438e-09
-0.17914	2.85034e-08	-0.17914	-7.66602e-09	-0.17914	9.69238e-09
-0.1767	2.87781e-08	-0.1767	-6.70776e-09	-0.1767	1.02539e-08
-0.17426	2.92664e-08	-0.17426	-5.81055e-09	-0.17426	1.06903e-08
-0.17181	2.99072e-08	-0.17181	-5.39551e-09	-0.17181	1.12213e-08
-0.16937	3.01514e-08	-0.16937	-4.28772e-09	-0.16937	1.17462e-08
-0.16693	3.04565e-08	-0.16693	-3.50647e-09	-0.16693	1.22498e-08
-0.16449	3.08533e-08	-0.16449	-2.5177e-09	-0.16449	1.29791e-08
-0.16205	3.10059e-08	-0.16205	-1.8158e-09	-0.16205	1.34308e-08
-0.15961	3.14331e-08	-0.15961	-1.02844e-09	-0.15961	1.39862e-08
-0.15717	3.14941e-08	-0.15717	-2.56348e-10	-0.15717	1.44623e-08
-0.15472	3.21655e-08	-0.15472	5.09644e-10	-0.15472	1.52466e-08
-0.15228	3.25928e-08	-0.15228	1.37634e-09	-0.15228	1.60736e-08
-0.14984	3.27454e-08	-0.14984	2.32849e-09	-0.14984	1.68884e-08
-0.1474	3.32642e-08	-0.1474	3.25317e-09	-0.1474	1.75629e-08
-0.14496	3.3783e-08	-0.14496	4.11682e-09	-0.14496	1.81305e-08
-0.14252	3.39966e-08	-0.14252	4.89502e-09	-0.14252	1.90399e-08
-0.14008	3.46985e-08	-0.14008	5.86548e-09	-0.14008	1.98608e-08
-0.13763	3.51563e-08	-0.13763	6.59485e-09	-0.13763	2.02728e-08
-0.13519	3.56445e-08	-0.13519	7.33643e-09	-0.13519	2.00165e-08
-0.13275	3.61328e-08	-0.13275	8.14514e-09	-0.13275	1.99829e-08
-0.13031	3.60107e-08	-0.13031	8.94165e-09	-0.13031	2.04559e-08
-0.12787	3.64075e-08	-0.12787	9.73206e-09	-0.12787	2.12402e-08
-0.12543	3.68652e-08	-0.12543	1.04919e-08	-0.12543	2.18475e-08
-0.12299	3.73535e-08	-0.12299	1.09863e-08	-0.12299	2.21802e-08
-0.12054	3.78418e-08	-0.12054	1.17554e-08	-0.12054	2.28882e-08
-0.1181	3.81165e-08	-0.1181	1.22833e-08	-0.1181	2.33643e-08
-0.11566	3.81775e-08	-0.11566	1.30951e-08	-0.11566	2.3703e-08
-0.11322	3.85132e-08	-0.11322	1.36688e-08	-0.11322	2.41089e-08
-0.11078	3.90015e-08	-0.11078	1.45905e-08	-0.11078	2.4646e-08
-0.10834	3.94897e-08	-0.10834	1.49994e-08	-0.10834	2.51587e-08
-0.1059	3.97339e-08	-0.1059	1.56952e-08	-0.1059	2.57416e-08
-0.10345	4.03748e-08	-0.10345	1.61652e-08	-0.10345	2.64435e-08
-0.10101	4.06494e-08	-0.10101	1.69403e-08	-0.10101	2.70782e-08
-0.09857	4.12292e-08	-0.09857	1.79138e-08	-0.09857	2.73621e-08
-0.09613	4.17175e-08	-0.09613	1.88843e-08	-0.09613	2.7774e-08
-0.09369	4.23279e-08	-0.09369	1.96869e-08	-0.09369	2.81616e-08
-0.09125	4.23889e-08	-0.09125	2.02759e-08	-0.09125	2.88635e-08
-0.08881	4.27551e-08	-0.08881	2.09351e-08	-0.08881	2.92389e-08
-0.08636	4.28467e-08	-0.08636	2.1637e-08	-0.08636	2.966e-08
-0.08392	4.30603e-08	-0.08392	2.22168e-08	-0.08392	3.0365e-08
-0.08148	4.36707e-08	-0.08148	2.31262e-08	-0.08148	3.09448e-08
-0.07904	4.41284e-08	-0.07904	2.37488e-08	-0.07904	3.1131e-08
-0.0766	4.44946e-08	-0.0766	2.43256e-08	-0.0766	3.18481e-08
-0.07416	4.47998e-08	-0.07416	2.51526e-08	-0.07416	3.23853e-08
-0.07172	4.53491e-08	-0.07172	2.5827e-08	-0.07172	3.28369e-08
-0.06927	4.57764e-08	-0.06927	2.66357e-08	-0.06927	3.302e-08
-0.06683	4.63562e-08	-0.06683	2.74353e-08	-0.06683	3.34473e-08
-0.06439	4.65088e-08	-0.06439	2.80029e-08	-0.06439	3.43323e-08
-0.06195	4.6875e-08	-0.06195	2.88391e-08	-0.06195	3.51563e-08
-0.05951	4.72717e-08	-0.05951	2.98157e-08	-0.05951	3.54919e-08
-0.05707	4.7699e-08	-0.05707	3.07007e-08	-0.05707	3.59192e-08
-0.05463	4.80347e-08	-0.05463	3.125e-08	-0.05463	3.63159e-08
-0.05219	4.84619e-08	-0.05219	3.20435e-08	-0.05219	3.65601e-08
-0.04974	4.90417e-08	-0.04974	3.26233e-08	-0.04974	3.68042e-08
-0.0473	4.96216e-08	-0.0473	3.34473e-08	-0.0473	3.71094e-08
-0.04486	5.00793e-08	-0.04486	3.40881e-08	-0.04486	3.80249e-08
-0.04242	5.04761e-08	-0.04242	3.50952e-08	-0.04242	3.85132e-08
-0.03998	5.07202e-08	-0.03998	3.55835e-08	-0.03998	3.93982e-08
-0.03754	5.13306e-08	-0.03754	3.61938e-08	-0.03754	3.97034e-08
-0.0351	5.18188e-08	-0.0351	3.7384e-08	-0.0351	3.98865e-08
-0.03265	5.19104e-08	-0.03265	3.8147e-08	-0.03265	4.07104e-08
-0.03021	5.27039e-08	-0.03021	3.87878e-08	-0.03021	4.13818e-08
-0.02777	5.31311e-08	-0.02777	3.93372e-08	-0.02777	4.1748e-08
-0.02533	5.35583e-08	-0.02533	4.01306e-08	-0.02533	4.19922e-08
-0.02289	5.40466e-08	-0.02289	4.09546e-08	-0.02289	4.28162e-08
-0.02045	5.42908e-08	-0.02045	4.16565e-08	-0.02045	4.30603e-08
-0.01801	5.47485e-08	-0.01801	4.26331e-08	-0.01801	4.3396e-08
-0.01556	5.48401e-08	-0.01556	4.31519e-08	-0.01556	4.40979e-08
-0.01312	5.53284e-08	-0.01312	4.39453e-08	-0.01312	4.47388e-08
-0.01068	5.5603e-08	-0.01068	4.47693e-08	-0.01068	4.49219e-08
-0.00824	5.60913e-08	-0.00824	4.57458e-08	-0.00824	4.55627e-08
-0.0058	5.63354e-08	-0.0058	4.62952e-08	-0.0058	4.5929e-08
-0.00336	5.67932e-08	-0.00336	4.71497e-08	-0.00336	4.66919e-08
-0.000915527	5.69458e-08	-0.000915527	4.80957e-08	-0.000915527	4.7699e-08
0.00153	5.78918e-08	0.00153	4.89197e-08	0.00153	4.83704e-08
0.00397	5.79834e-08	0.00397	4.9408e-08	0.00397	4.91638e-08
0.00641	5.82886e-08	0.00641	4.99878e-08	0.00641	4.96521e-08
0.00885	5.85022e-08	0.00885	5.05981e-08	0.00885	5.00183e-08
0.01129	5.92651e-08	0.01129	5.15747e-08	0.01129	5.05981e-08
0.01373	5.95703e-08	0.01373	5.23682e-08	0.01373	5.10254e-08
0.01617	6.02112e-08	0.01617	5.26123e-08	0.01617	5.16052e-08
0.01862	6.03027e-08	0.01862	5.31311e-08	0.01862	5.2063e-08
0.02106	6.073e-08	0.02106	5.3833e-08	0.02106	5.27344e-08
0.0235	6.11877e-08	0.0235	5.43518e-08	0.0235	5.32532e-08
0.02594	6.1676e-08	0.02594	5.54199e-08	0.02594	5.3772e-08
0.02838	6.22864e-08	0.02838	5.59387e-08	0.02838	5.41077e-08
0.03082	6.28662e-08	0.03082	5.70679e-08	0.03082	5.45654e-08
0.03326	6.28052e-08	0.03326	5.7251e-08	0.03326	5.46265e-08
0.03571	6.3446e-08	0.03571	5.74341e-08	0.03571	5.52673e-08
0.03815	6.40564e-08	0.03815	5.80444e-08	0.03815	5.59387e-08
0.04059	6.48193e-08	0.04059	5.89294e-08	0.04059	5.62744e-08
0.04303	6.54907e-08	0.04303	5.99365e-08	0.04303	5.71899e-08
0.04547	6.63757e-08	0.04547	6.06079e-08	0.04547	5.78613e-08
0.04791	6.6925e-08	0.04791	6.11877e-08	0.04791	5.82581e-08
0.05035	6.78406e-08	0.05035	6.19507e-08	0.05035	5.86853e-08
0.0528	6.83289e-08	0.0528	6.22253e-08	0.0528	5.94482e-08
0.05524	6.88477e-08	0.05524	6.35071e-08	0.05524	5.97839e-08
0.05768	6.90918e-08	0.05768	6.50024e-08	0.05768	6.04248e-08
0.06012	6.93665e-08	0.06012	6.46362e-08	0.06012	6.14014e-08
0.06256	7.02515e-08	0.06256	6.52466e-08	0.06256	6.22253e-08
0.065	7.07397e-08	0.065	6.52466e-08	0.065	6.26526e-08
0.06744	7.14722e-08	0.06744	6.6864e-08	0.06744	6.32324e-08
0.06989	7.23877e-08	0.06989	6.79626e-08	0.06989	6.35986e-08
0.07233	7.27844e-08	0.07233	6.84204e-08	0.07233	6.39648e-08
0.07477	7.34558e-08	0.07477	6.91833e-08	0.07477	6.45752e-08
0.07721	7.3822e-08	0.07721	7.00073e-08	0.07721	6.53381e-08
0.07965	7.4585e-08	0.07965	7.08923e-08	0.07965	6.5979e-08
0.08209	7.53174e-08	0.08209	7.18994e-08	0.08209	6.66809e-08
0.08453	7.59277e-08	0.08453	7.29675e-08	0.08453	6.73523e-08
0.08698	7.63245e-08	0.08698	7.35168e-08	0.08698	6.81152e-08
0.08942	7.69348e-08	0.08942	7.40356e-08	0.08942	6.88782e-08
0.09186	7.73621e-08	0.09186	7.51343e-08	0.09186	6.9397e-08
0.0943	7.8064e-08	0.0943	7.61719e-08	0.0943	7.01294e-08
0.09674	7.86133e-08	0.09674	7.68433e-08	0.09674	7.09839e-08
0.09918	7.95898e-08	0.09918	7.73315e-08	0.09918	7.17773e-08
0.10162	8.05664e-08	0.10162	7.8186e-08	0.10162	7.22046e-08
0.10406	8.14209e-08	0.10406	7.91016e-08	0.10406	7.25708e-08
0.10651	8.21838e-08	0.10651	8.00476e-08	0.10651	7.2937e-08
0.10895	8.3313e-08	0.10895	8.10852e-08	0.10895	7.3761e-08
0.11139	8.38623e-08	0.11139	8.18787e-08	0.11139	7.43408e-08
0.11383	8.42285e-08	0.11383	8.25806e-08	0.11383	7.52869e-08
0.11627	8.49915e-08	0.11627	8.34656e-08	0.11627	7.5592e-08
0.11871	8.60901e-08	0.11871	8.4198e-08	0.11871	7.64771e-08
0.12115	8.68835e-08	0.12115	8.51135e-08	0.12115	7.69958e-08
0.1236	8.76465e-08	0.1236	8.5968e-08	0.1236	7.80334e-08
0.12604	8.87756e-08	0.12604	8.68835e-08	0.12604	7.87354e-08
0.12848	8.96606e-08	0.12848	8.78601e-08	0.12848	7.91626e-08
0.13092	9.0332e-08	0.13092	8.81653e-08	0.13092	7.99866e-08
0.13336	9.13391e-08	0.13336	8.9325e-08	0.13336	8.0719e-08
0.1358	9.15833e-08	0.1358	9.04846e-08	0.1358	8.16345e-08
0.13824	9.23157e-08	0.13824	9.17969e-08	0.13824	8.23059e-08
0.14069	9.27124e-08	0.14069	9.198e-08	0.14069	8.30078e-08
0.14313	9.36279e-08	0.14313	9.2804e-08	0.14313	8.36487e-08
0.14557	9.46045e-08	0.14557	9.31396e-08	0.14557	8.44421e-08
0.14801	9.58557e-08	0.14801	9.4574e-08	0.14801	8.53882e-08
0.15045	9.64661e-08	0.15045	9.57336e-08	0.15045	8.55408e-08
0.15289	9.75342e-08	0.15289	9.6405e-08	0.15289	8.65479e-08
0.15533	9.89685e-08	0.15533	9.79614e-08	0.15533	8.69141e-08
0.15778	9.96704e-08	0.15778	9.86023e-08	0.15778	8.7677e-08
0.16022	1.01013e-07	0.16022	9.97925e-08	0.16022	8.81653e-08
0.16266	1.01959e-07	0.16266	1.00647e-07	0.16266	8.87146e-08
0.1651	1.03088e-07	0.1651	1.01593e-07	0.1651	8.94165e-08
0.16754	1.04553e-07	0.16754	1.02539e-07	0.16754	8.99048e-08
0.16998	1.05164e-07	0.16998	1.03485e-07	0.16998	9.08203e-08
0.17242	1.06293e-07	0.17242	1.04462e-07	0.17242	9.15833e-08
0.17487	1.07086e-07	0.17487	1.05194e-07	0.17487	9.20715e-08
0.17731	1.08368e-07	0.17731	1.05957e-07	0.17731	9.24072e-08
0.17975	1.09314e-07	0.17975	1.06598e-07	0.17975	9.32007e-08
0.18219	1.10321e-07	0.18219	1.07574e-07	0.18219	9.42688e-08
0.18463	1.11511e-07	0.18463	1.08307e-07	0.18463	9.51538e-08
0.18707	1.12823e-07	0.18707	1.09772e-07	0.18707	9.60388e-08
0.18951	1.13892e-07	0.18951	1.10626e-07	0.18951	9.63745e-08
0.19196	1.14899e-07	0.19196	1.11328e-07	0.19196	9.64661e-08
0.1944	1.15845e-07	0.1944	1.11755e-07	0.1944	9.66492e-08
0.19684	1.16577e-07	0.19684	1.12518e-07	0.19684	9.69238e-08
0.19928	1.18164e-07	0.19928	1.13983e-07	0.19928	9.75647e-08
0.20172	1.1911e-07	0.20172	1.14838e-07	0.20172	9.78394e-08
0.20416	1.20483e-07	0.20416	1.1615e-07	0.20416	9.83887e-08
0.2066	1.21918e-07	0.2066	1.16943e-07	0.2066	9.90295e-08
0.20905	1.22894e-07	0.20905	1.18103e-07	0.20905	9.94873e-08
0.21149	1.24298e-07	0.21149	1.19385e-07	0.21149	1.00128e-07
0.21393	1.2558e-07	0.21393	1.20544e-07	0.21393	1.00861e-07
0.21637	1.27045e-07	0.21637	1.21277e-07	0.21637	1.01379e-07
0.21881	1.28052e-07	0.21881	1.21918e-07	0.21881	1.01898e-07
0.22125	1.29364e-07	0.22125	1.22437e-07	0.22125	1.02386e-07
0.22369	1.31104e-07	0.22369	1.23077e-07	0.22369	1.02631e-07
0.22614	1.32294e-07	0.22614	1.24084e-07	0.22614	1.03119e-07
0.22858	1.33514e-07	0.22858	1.24756e-07	0.22858	1.03668e-07
0.23102	1.3501e-07	0.23102	1.25824e-07	0.23102	1.04889e-07
0.23346	1.36322e-07	0.23346	1.26831e-07	0.23346	1.05133e-07
0.2359	1.37604e-07	0.2359	1.27869e-07	0.2359	1.05743e-07
0.23834	1.38885e-07	0.23834	1.28967e-07	0.23834	1.06171e-07
0.24078	1.39832e-07	0.24078	1.29852e-07	0.24078	1.0672e-07
0.24323	1.41388e-07	0.24323	1.30493e-07	0.24323	1.07544e-07
0.24567	1.42792e-07	0.24567	1.31348e-07	0.24567	1.0788e-07
0.24811	1.4386e-07	0.24811	1.32141e-07	0.24811	1.08307e-07
0.25055	1.45111e-07	0.25055	1.32904e-07	0.25055	1.08765e-07
0.25299	1.46576e-07	0.25299	1.33118e-07	0.25299	1.08887e-07
0.25543	1.48224e-07	0.25543	1.34186e-07	0.25543	1.09711e-07
0.25787	1.49384e-07	0.25787	1.34918e-07	0.25787	1.10016e-07
0.26031	1.50879e-07	0.26031	1.35864e-07	0.26031	1.10046e-07
0.26276	1.52863e-07	0.26276	1.37238e-07	0.26276	1.10474e-07
0.2652	1.54419e-07	0.2652	1.38062e-07	0.2652	1.11603e-07
0.26764	1.56036e-07	0.26764	1.38916e-07	0.26764	1.12152e-07
0.27008	1.57715e-07	0.27008	1.40045e-07	0.27008	1.12244e-07
0.27252	1.59363e-07	0.27252	1.41083e-07	0.27252	1.12274e-07
0.27496	1.61011e-07	0.27496	1.41907e-07	0.27496	1.12915e-07
0.2774	1.6272e-07	0.2774	1.43097e-07	0.2774	1.13983e-07
0.27985	1.64734e-07	0.27985	1.43738e-07	0.27985	1.1438e-07
0.28229	1.66138e-07	0.28229	1.44684e-07	0.28229	1.15356e-07
0.28473	1.67542e-07	0.28473	1.45325e-07	0.28473	1.15417e-07
0.28717	1.69678e-07	0.28717	1.45782e-07	0.28717	1.1615e-07
0.28961	1.71448e-07	0.28961	1.46484e-07	0.28961	1.16455e-07
0.29205	1.73462e-07	0.29205	1.47369e-07	0.29205	1.17188e-07
0.29449	1.75873e-07	0.29449	1.47766e-07	0.29449	1.18164e-07
0.29694	1.77185e-07	0.29694	1.48407e-07	0.29694	1.18469e-07
0.29938	1.79657e-07	0.29938	1.49536e-07	0.29938	1.19324e-07
0.30182	1.81305e-07	0.30182	1.50909e-07	0.30182	1.19812e-07
0.30426	1.83502e-07	0.30426	1.51978e-07	0.30426	1.20483e-07
0.3067	1.85577e-07	0.3067	1.52435e-07	0.3067	1.21552e-07
0.30914	1.88019e-07	0.30914	1.53595e-07	0.30914	1.22101e-07
0.31158	1.89911e-07	0.31158	1.54205e-07	0.31158	1.22223e-07
0.31403	1.92169e-07	0.31403	1.54968e-07	0.31403	1.21979e-07
0.31647	1.94397e-07	0.31647	1.55548e-07	0.31647	1.22986e-07
0.31891	1.96259e-07	0.31891	1.5625e-07	0.31891	1.23779e-07
0.32135	1.98517e-07	0.32135	1.57166e-07	0.32135	1.24542e-07
0.32379	2.00806e-07	0.32379	1.5802e-07	0.32379	1.24969e-07
0.32623	2.03003e-07	0.32623	1.58844e-07	0.32623	1.25458e-07
0.32867	2.05109e-07	0.32867	1.59882e-07	0.32867	1.26038e-07
0.33112	2.07092e-07	0.33112	1.60736e-07	0.33112	1.2619e-07
0.33356	2.099e-07	0.33356	1.61652e-07	0.33356	1.27106e-07
0.336	2.11456e-07	0.336	1.62109e-07	0.336	1.27716e-07
0.33844	2.13684e-07	0.33844	1.62994e-07	0.33844	1.28235e-07
0.34088	2.15729e-07	0.34088	1.64734e-07	0.34088	1.29456e-07
0.34332	2.1814e-07	0.34332	1.65497e-07	0.34332	1.30249e-07
0.34576	2.20093e-07	0.34576	1.6687e-07	0.34576	1.3031e-07
0.34821	2.22717e-07	0.34821	1.67694e-07	0.34821	1.30737e-07
0.35065	2.25281e-07	0.35065	1.68213e-07	0.35065	1.30829e-07
0.35309	2.27264e-07	0.35309	1.69006e-07	0.35309	1.30798e-07
0.35553	2.2934e-07	0.35553	1.69586e-07	0.35553	1.30859e-07
0.35797	2.31079e-07	0.35797	1.70013e-07	0.35797	1.31256e-07
0.36041	2.33063e-07	0.36041	1.70685e-07	0.36041	1.32141e-07
0.36285	2.35809e-07	0.36285	1.71417e-07	0.36285	1.32233e-07
0.3653	2.38159e-07	0.3653	1.72211e-07	0.3653	1.33026e-07
0.36774	2.40479e-07	0.36774	1.73645e-07	0.36774	1.33972e-07
0.37018	2.42279e-07	0.37018	1.74011e-07	0.37018	1.34338e-07
0.37262	2.44873e-07	0.37262	1.75049e-07	0.37262	1.35712e-07
0.37506	2.46613e-07	0.37506	1.75751e-07	0.37506	1.35101e-07
0.3775	2.4881e-07	0.3775	1.76178e-07	0.3775	1.35803e-07
0.37994	2.50519e-07	0.37994	1.7688e-07	0.37994	1.36505e-07
0.38239	2.53021e-07	0.38239	1.78162e-07	0.38239	1.37695e-07
0.38483	2.54852e-07	0.38483	1.78528e-07	0.38483	1.38184e-07
0.38727	2.56958e-07	0.38727	1.80328e-07	0.38727	1.39465e-07
0.38971	2.58392e-07	0.38971	1.81213e-07	0.38971	1.39587e-07
0.39215	2.60376e-07	0.39215	1.81549e-07	0.39215	1.40808e-07
0.39459	2.62024e-07	0.39459	1.82648e-07	0.39459	1.41022e-07
0.39703	2.63916e-07	0.39703	1.83685e-07	0.39703	1.42273e-07
0.39948	2.66052e-07	0.39948	1.85272e-07	0.39948	1.43066e-07
0.40192	2.6825e-07	0.40192	1.86798e-07	0.40192	1.43372e-07
0.40436	2.69684e-07	0.40436	1.87622e-07	0.40436	1.43555e-07
0.4068	2.71606e-07	0.4068	1.89117e-07	0.4068	1.44348e-07
0.40924	2.73407e-07	0.40924	1.90582e-07	0.40924	1.44623e-07
0.41168	2.75879e-07	0.41168	1.90796e-07	0.41168	1.44989e-07
0.41412	2.7713e-07	0.41412	1.91895e-07	0.41412	1.46484e-07
0.41656	2.7951e-07	0.41656	1.9281e-07	0.41656	1.4682e-07
0.41901	2.81067e-07	0.41901	1.93298e-07	0.41901	1.47186e-07
0.42145	2.82959e-07	0.42145	1.95404e-07	0.42145	1.48407e-07
0.42389	2.84241e-07	0.42389	1.96564e-07	0.42389	1.48315e-07
0.42633	2.85797e-07	0.42633	1.97601e-07	0.42633	1.492e-07
0.42877	2.86987e-07	0.42877	1.98517e-07	0.42877	1.49689e-07
0.43121	2.88635e-07	0.43121	1.99799e-07	0.43121	1.50696e-07
0.43365	2.89124e-07	0.43365	2.00928e-07	0.43365	1.50909e-07
0.4361	2.9071e-07	0.4361	2.02332e-07	0.4361	1.51733e-07
0.43854	2.91687e-07	0.43854	2.03705e-07	0.43854	1.521e-07
0.44098	2.92297e-07	0.44098	2.04529e-07	0.44098	1.52588e-07
0.44342	2.93335e-07	0.44342	2.06177e-07	0.44342	1.52985e-07
0.44586	2.94312e-07	0.44586	2.06909e-07	0.44586	1.54083e-07
0.4483	2.95105e-07	0.4483	2.07336e-07	0.4483	1.54572e-07
0.45074	2.95593e-07	0.45074	2.07764e-07	0.45074	1.5564e-07
0.45319	2.9657e-07	0.45319	2.0816e-07	0.45319	1.56036e-07
0.45563	2.97455e-07	0.45563	2.09595e-07	0.45563	1.57349e-07
0.45807	2.98492e-07	0.45807	2.10785e-07	0.45807	1.57867e-07
0.46051	2.99103e-07	0.46051	2.10541e-07	0.46051	1.58447e-07
0.46295	2.99835e-07	0.46295	2.11792e-07	0.46295	1.58905e-07
0.46539	2.99713e-07	0.46539	2.13654e-07	0.46539	1.59729e-07
0.46783	2.99469e-07	0.46783	2.14661e-07	0.46783	1.60492e-07
0.47028	2.99835e-07	0.47028	2.14813e-07	0.47028	1.61377e-07
0.47272	2.99438e-07	0.47272	2.15973e-07	0.47272	1.62262e-07
0.47516	2.99652e-07	0.47516	2.16827e-07	0.47516	1.62842e-07
0.4776	3.0011e-07	0.4776	2.17682e-07	0.4776	1.63452e-07
0.48004	3.00537e-07	0.48004	2.1814e-07	0.48004	1.64368e-07
0.48248	3.00415e-07	0.48248	2.18964e-07	0.48248	1.64459e-07
0.48492	3.00507e-07	0.48492	2.20032e-07	0.48492	1.65833e-07
0.48737	3.00598e-07	0.48737	2.21313e-07	0.48737	1.66443e-07
0.48981	3.01178e-07	0.48981	2.21771e-07	0.48981	1.67084e-07
0.49225	3.01422e-07	0.49225	2.23175e-07	0.49225	1.67542e-07
0.49469	3.01544e-07	0.49469	2.23969e-07	0.49469	1.68549e-07
0.49713	3.01849e-07	0.49713	2.24487e-07	0.49713	1.69067e-07
0.49957	3.02216e-07	0.49957	2.25342e-07	0.49957	1.70441e-07
0.50201	3.01697e-07	0.50201	2.26898e-07	0.50201	1.71051e-07
0.50446	3.02429e-07	0.50446	2.27997e-07	0.50446	1.71295e-07
0.5069	3.01727e-07	0.5069	2.28699e-07	0.5069	1.72729e-07
0.50934	3.01086e-07	0.50934	2.29553e-07	0.50934	1.7334e-07
0.51178	3.0072e-07	0.51178	2.30865e-07	0.51178	1.74469e-07
0.51422	3.00842e-07	0.51422	2.32178e-07	0.51422	1.74835e-07
0.51666	3.01331e-07	0.51666	2.33124e-07	0.51666	1.76117e-07
0.5191	3.01941e-07	0.5191	2.34833e-07	0.5191	1.77277e-07
0.52155	3.013e-07	0.52155	2.3645e-07	0.52155	1.78772e-07
0.52399	3.01575e-07	0.52399	2.37061e-07	0.52399	1.79626e-07
0.52643	3.02032e-07	0.52643	2.38434e-07	0.52643	1.80145e-07
0.52887	3.02673e-07	0.52887	2.38342e-07	0.52887	1.80573e-07
0.53131	3.03253e-07	0.53131	2.39319e-07	0.53131	1.81183e-07
0.53375	3.03223e-07	0.53375	2.40631e-07	0.53375	1.81915e-07
0.53619	3.03131e-07	0.53619	2.41699e-07	0.53619	1.83411e-07
0.53864	3.02917e-07	0.53864	2.42523e-07	0.53864	1.83868e-07
0.54108	3.02216e-07	0.54108	2.43469e-07	0.54108	1.84662e-07
0.54352	3.02795e-07	0.54352	2.44232e-07	0.54352	1.85394e-07
0.54596	3.02612e-07	0.54596	2.44415e-07	0.54596	1.86157e-07
0.5484	3.02826e-07	0.5484	2.46094e-07	0.5484	1.86676e-07
0.55084	3.0365e-07	0.55084	2.46887e-07	0.55084	1.87836e-07
0.55328	3.03406e-07	0.55328	2.47803e-07	0.55328	1.88782e-07
0.55573	3.04169e-07	0.55573	2.49207e-07	0.55573	1.90033e-07
0.55817	3.04688e-07	0.55817	2.50671e-07	0.55817	1.91193e-07
0.56061	3.05603e-07	0.56061	2.5235e-07	0.56061	1.92078e-07
0.56305	3.06274e-07	0.56305	2.53113e-07	0.56305	1.92627e-07
0.56549	3.06122e-07	0.56549	2.54791e-07	0.56549	1.93451e-07
0.56793	3.06305e-07	0.56793	2.55829e-07	0.56793	1.94672e-07
0.57037	3.06854e-07	0.57037	2.56866e-07	0.57037	1.95099e-07
0.57281	3.08075e-07	0.57281	2.57874e-07	0.57281	1.95831e-07
0.57526	3.08899e-07	0.57526	2.58087e-07	0.57526	1.96594e-07
0.5777	3.08716e-07	0.5777	2.59735e-07	0.5777	1.97357e-07
0.58014	3.08899e-07	0.58014	2.6123e-07	0.58014	1.98181e-07
0.58258	3.08929e-07	0.58258	2.61536e-07	0.58258	1.99127e-07
0.58502	3.09387e-07	0.58502	2.63031e-07	0.58502	1.99768e-07
0.58746	3.09509e-07	0.58746	2.64526e-07	0.58746	2.00958e-07
0.5899	3.09875e-07	0.5899	2.65839e-07	0.5899	2.01172e-07
0.59235	3.10822e-07	0.59235	2.6651e-07	0.59235	2.02515e-07
0.59479	3.11707e-07	0.59479	2.67303e-07	0.59479	2.03369e-07
0.59723	3.12775e-07	0.59723	2.68372e-07	0.59723	2.03949e-07
0.59967	3.13904e-07	0.59967	2.69012e-07	0.59967	2.04468e-07
0.60211	3.15704e-07	0.60211	2.7005e-07	0.60211	2.05292e-07
0.60455	3.1723e-07	0.60455	2.71362e-07	0.60455	2.0575e-07
0.60699	3.18329e-07	0.60699	2.72339e-07	0.60699	2.07825e-07
0.60944	3.1897e-07	0.60944	2.72827e-07	0.60944	2.08038e-07
0.61188	3.19824e-07	0.61188	2.73315e-07	0.61188	2.09015e-07
0.61432	3.2077e-07	0.61432	2.73315e-07	0.61432	2.09106e-07
0.61676	3.21655e-07	0.61676	2.742e-07	0.61676	2.10083e-07
0.6192	3.22449e-07	0.6192	2.75635e-07	0.6192	2.10968e-07
0.62164	3.22815e-07	0.62164	2.75848e-07	0.62164	2.1109e-07
0.62408	3.23303e-07	0.62408	2.7536e-07	0.62408	2.11792e-07
0.62653	3.23914e-07	0.62653	2.76245e-07	0.62653	2.13562e-07
0.62897	3.24829e-07	0.62897	2.771e-07	0.62897	2.14111e-07
0.63141	3.2605e-07	0.63141	2.78961e-07	0.63141	2.15668e-07
0.63385	3.27026e-07	0.63385	2.80029e-07	0.63385	2.16309e-07
0.63629	3.28918e-07	0.63629	2.80609e-07	0.63629	2.16553e-07
0.63873	3.30109e-07	0.63873	2.82806e-07	0.63873	2.18262e-07
0.64117	3.30963e-07	0.64117	2.8363e-07	0.64117	2.19543e-07
0.64362	3.31665e-07	0.64362	2.83417e-07	0.64362	2.20337e-07
0.64606	3.3313e-07	0.64606	2.8476e-07	0.64606	2.211e-07
0.6485	3.33344e-07	0.6485	2.85675e-07	0.6485	2.21283e-07
0.65094	3.35052e-07	0.65094	2.86621e-07	0.65094	2.22626e-07
0.65338	3.35602e-07	0.65338	2.89001e-07	0.65338	2.23358e-07
0.65582	3.36304e-07	0.65582	2.90314e-07	0.65582	2.23663e-07
0.65826	3.36975e-07	0.65826	2.9126e-07	0.65826	2.24854e-07
0.66071	3.39264e-07	0.66071	2.92175e-07	0.66071	2.26746e-07
0.66315	3.41064e-07	0.66315	2.93701e-07	0.66315	2.2699e-07
0.66559	3.42896e-07	0.66559	2.94708e-07	0.66559	2.28943e-07
0.66803	3.44757e-07	0.66803	2.96112e-07	0.66803	2.29309e-07
0.67047	3.45703e-07	0.67047	2.96021e-07	0.67047	2.30377e-07
0.67291	3.47229e-07	0.67291	2.98218e-07	0.67291	2.31384e-07
0.67535	3.4848e-07	0.67535	2.99805e-07	0.67535	2.31934e-07
0.6778	3.49762e-07	0.6778	2.99286e-07	0.6778	2.33307e-07
0.68024	3.50342e-07	0.68024	3.00751e-07	0.68024	2.34833e-07
0.68268	3.51227e-07	0.68268	3.01971e-07	0.68268	2.35809e-07
0.68512	3.52417e-07	0.68512	3.03528e-07	0.68512	2.36816e-07
0.68756	3.53485e-07	0.68756	3.03741e-07	0.68756	2.37488e-07
0.69	3.54706e-07	0.69	3.04504e-07	0.69	2.38647e-07
0.69244	3.55835e-07	0.69244	3.05603e-07	0.69244	2.39471e-07
0.69489	3.573e-07	0.69489	3.07037e-07	0.69489	2.40692e-07
0.69733	3.58704e-07	0.69733	3.07892e-07	0.69733	2.42462e-07
0.69977	3.59863e-07	0.69977	3.09296e-07	0.69977	2.43347e-07
0.70221	3.60504e-07	0.70221	3.10699e-07	0.70221	2.44385e-07
0.70465	3.62061e-07	0.70465	3.13019e-07	0.70465	2.45758e-07
0.70709	3.63892e-07	0.70709	3.14117e-07	0.70709	2.47498e-07
0.70953	3.65356e-07	0.70953	3.15704e-07	0.70953	2.47925e-07
0.71198	3.66394e-07	0.71198	3.17139e-07	0.71198	2.49298e-07
0.71442	3.68408e-07	0.71442	3.18237e-07	0.71442	2.50031e-07
0.71686	3.6972e-07	0.71686	3.19977e-07	0.71686	2.51923e-07
0.7193	3.71521e-07	0.7193	3.20831e-07	0.7193	2.52686e-07
0.72174	3.72467e-07	0.72174	3.21808e-07	0.72174	2.5351e-07
0.72418	3.74023e-07	0.72418	3.2309e-07	0.72418	2.54517e-07
0.72662	3.75153e-07	0.72662	3.25226e-07	0.72662	2.54578e-07
0.72906	3.77014e-07	0.72906	3.25623e-07	0.72906	2.55676e-07
0.73151	3.78448e-07	0.73151	3.27118e-07	0.73151	2.57172e-07
0.73395	3.79913e-07	0.73395	3.27423e-07	0.73395	2.58667e-07
0.73639	3.81714e-07	0.73639	3.29437e-07	0.73639	2.59918e-07
0.73883	3.83453e-07	0.73883	3.3078e-07	0.73883	2.61414e-07
0.74127	3.84369e-07	0.74127	3.3194e-07	0.74127	2.63e-07
0.74371	3.86017e-07	0.74371	3.33984e-07	0.74371	2.64954e-07
0.74615	3.87543e-07	0.74615	3.36334e-07	0.74615	2.66144e-07
0.7486	3.89099e-07	0.7486	3.37555e-07	0.7486	2.67487e-07
0.75104	3.909e-07	0.75104	3.40088e-07	0.75104	2.6947e-07
0.75348	3.92365e-07	0.75348	3.41583e-07	0.75348	2.70599e-07
0.75592	3.94287e-07	0.75592	3.44208e-07	0.75592	2.73041e-07
0.75836	3.96027e-07	0.75836	3.46619e-07	0.75836	2.74017e-07
0.7608	3.97217e-07	0.7608	3.47656e-07	0.7608	2.75818e-07
0.76324	3.98926e-07	0.76324	3.50525e-07	0.76324	2.77283e-07
0.76569	4.00421e-07	0.76569	3.51868e-07	0.76569	2.78168e-07
0.76813	4.02618e-07	0.76813	3.53699e-07	0.76813	2.7948e-07
0.77057	4.04602e-07	0.77057	3.55438e-07	0.77057	2.81921e-07
0.77301	4.06769e-07	0.77301	3.56537e-07	0.77301	2.82806e-07
0.77545	4.0921e-07	0.77545	3.59314e-07	0.77545	2.84424e-07
0.77789	4.10248e-07	0.77789	3.61694e-07	0.77789	2.86652e-07
0.78033	4.12659e-07	0.78033	3.6319e-07	0.78033	2.87842e-07
0.78278	4.14551e-07	0.78278	3.66547e-07	0.78278	2.89215e-07
0.78522	4.16168e-07	0.78522	3.67828e-07	0.78522	2.90375e-07
0.78766	4.18488e-07	0.78766	3.71216e-07	0.78766	2.91595e-07
0.7901	4.20502e-07	0.7901	3.7381e-07	0.7901	2.93549e-07
0.79254	4.23096e-07	0.79254	3.76434e-07	0.79254	2.94922e-07
0.79498	4.245e-07	0.79498	3.77045e-07	0.79498	2.96509e-07
0.79742	4.26727e-07	0.79742	3.78906e-07	0.79742	2.98828e-07
0.79987	4.27948e-07	0.79987	3.79852e-07	0.79987	3.0014e-07
0.80231	4.30084e-07	0.80231	3.81348e-07	0.80231	3.03589e-07
0.80475	4.31824e-07	0.80475	3.83759e-07	0.80475	3.04321e-07
0.80719	4.3396e-07	0.80719	3.86597e-07	0.80719	3.06946e-07
0.80963	4.36066e-07	0.80963	3.87207e-07	0.80963	3.09296e-07
0.81207	4.37927e-07	0.81207	3.89587e-07	0.81207	3.10974e-07
0.81451	4.38965e-07	0.81451	3.91449e-07	0.81451	3.1311e-07
0.81696	4.41101e-07	0.81696	3.94226e-07	0.81696	3.14453e-07
0.8194	4.42352e-07	0.8194	3.95691e-07	0.8194	3.16742e-07
0.82184	4.44092e-07	0.82184	3.97186e-07	0.82184	3.18359e-07
0.82428	4.45282e-07	0.82428	3.9917e-07	0.82428	3.19946e-07
0.82672	4.46838e-07	0.82672	4.0152e-07	0.82672	3.22266e-07
0.82916	4.48456e-07	0.82916	4.04633e-07	0.82916	3.2431e-07
0.8316	4.50867e-07	0.8316	4.05243e-07	0.8316	3.27148e-07
0.83405	4.5282e-07	0.83405	4.06586e-07	0.83405	3.28522e-07
0.83649	4.54956e-07	0.83649	4.09912e-07	0.83649	3.30139e-07
0.83893	4.57031e-07	0.83893	4.11743e-07	0.83893	3.30963e-07
0.84137	4.59869e-07	0.84137	4.14825e-07	0.84137	3.32825e-07
0.84381	4.61761e-07	0.84381	4.17236e-07	0.84381	3.36395e-07
0.84625	4.64355e-07	0.84625	4.19281e-07	0.84625	3.38013e-07
0.84869	4.6637e-07	0.84869	4.21234e-07	0.84869	3.39996e-07
0.85114	4.69299e-07	0.85114	4.23035e-07	0.85114	3.42804e-07
0.85358	4.72137e-07	0.85358	4.2392e-07	0.85358	3.44818e-07
0.85602	4.7467e-07	0.85602	4.27673e-07	0.85602	3.47351e-07
0.85846	4.77264e-07	0.85846	4.29321e-07	0.85846	3.4964e-07
0.8609	4.7937e-07	0.8609	4.31763e-07	0.8609	3.5257e-07
0.86334	4.81079e-07	0.86334	4.35211e-07	0.86334	3.55225e-07
0.86578	4.82635e-07	0.86578	4.37927e-07	0.86578	3.58795e-07
0.86823	4.83521e-07	0.86823	4.41101e-07	0.86823	3.61267e-07
0.87067	4.8526e-07	0.87067	4.4278e-07	0.87067	3.64563e-07
0.87311	4.87152e-07	0.87311	4.46045e-07	0.87311	3.68225e-07
0.87555	4.89136e-07	0.87555	4.48975e-07	0.87555	3.6969e-07
0.87799	4.90875e-07	0.87799	4.52667e-07	0.87799	3.72986e-07
0.88043	4.93317e-07	0.88043	4.54193e-07	0.88043	3.74908e-07
0.88287	4.95392e-07	0.88287	4.57672e-07	0.88287	3.76678e-07
0.88531	4.98199e-07	0.88531	4.60175e-07	0.88531	3.79181e-07
0.88776	5.00397e-07	0.88776	4.62524e-07	0.88776	3.81714e-07
0.8902	5.03235e-07	0.8902	4.66339e-07	0.8902	3.85223e-07
0.89264	5.05737e-07	0.89264	4.69208e-07	0.89264	3.86597e-07
0.89508	5.0882e-07	0.89508	4.73053e-07	0.89508	3.88367e-07
0.89752	5.10986e-07	0.89752	4.75555e-07	0.89752	3.92914e-07
0.89996	5.13214e-07	0.89996	4.78607e-07	0.89996	3.95782e-07
0.9024	5.159e-07	0.9024	4.81781e-07	0.9024	3.9801e-07
0.90485	5.18951e-07	0.90485	4.84467e-07	0.90485	3.99475e-07
0.90729	5.20233e-07	0.90729	4.88007e-07	0.90729	4.00146e-07
0.90973	5.224e-07	0.90973	4.92828e-07	0.90973	4.04053e-07
0.91217	5.24841e-07	0.91217	4.94568e-07	0.91217	4.07532e-07
0.91461	5.28137e-07	0.91461	4.96429e-07	0.91461	4.09973e-07
0.91705	5.30579e-07	0.91705	4.99817e-07	0.91705	4.11316e-07
0.91949	5.33173e-07	0.91949	5.03357e-07	0.91949	4.13666e-07
0.92194	5.35431e-07	0.92194	5.06317e-07	0.92194	4.16595e-07
0.92438	5.37659e-07	0.92438	5.10254e-07	0.92438	4.198e-07
0.92682	5.40405e-07	0.92682	5.14099e-07	0.92682	4.2453e-07
0.92926	5.43213e-07	0.92926	5.17517e-07	0.92926	4.27002e-07
0.9317	5.46509e-07	0.9317	5.2005e-07	0.9317	4.29871e-07
0.93414	5.49713e-07	0.93414	5.23956e-07	0.93414	4.32281e-07
0.93658	5.52277e-07	0.93658	5.27008e-07	0.93658	4.35333e-07
0.93903	5.55023e-07	0.93903	5.31342e-07	0.93903	4.38385e-07
0.94147	5.58075e-07	0.94147	5.354e-07	0.94147	4.40918e-07
0.94391	5.60638e-07	0.94391	5.39032e-07	0.94391	4.44641e-07
0.94635	5.63232e-07	0.94635	5.43518e-07	0.94635	4.47968e-07
0.94879	5.66467e-07	0.94879	5.47668e-07	0.94879	4.51935e-07
0.95123	5.68573e-07	0.95123	5.50812e-07	0.95123	4.54681e-07
0.95367	5.72205e-07	0.95367	5.54352e-07	0.95367	4.58282e-07
0.95612	5.75256e-07	0.95612	5.57251e-07	0.95612	4.61731e-07
0.95856	5.77759e-07	0.95856	5.6189e-07	0.95856	4.64661e-07
0.961	5.81268e-07	0.961	5.62714e-07	0.961	4.68964e-07
0.96344	5.8432e-07	0.96344	5.66345e-07	0.96344	4.71924e-07
0.96588	5.88257e-07	0.96588	5.69916e-07	0.96588	4.76349e-07
0.96832	5.91583e-07	0.96832	5.72662e-07	0.96832	4.80469e-07
0.97076	5.94147e-07	0.97076	5.76019e-07	0.97076	4.84131e-07
0.97321	5.97229e-07	0.97321	5.78644e-07	0.97321	4.88495e-07
0.97565	6.00342e-07	0.97565	5.81421e-07	0.97565	4.91455e-07
0.97809	6.02112e-07	0.97809	5.84991e-07	0.97809	4.95483e-07
0.98053	6.04553e-07	0.98053	5.88806e-07	0.98053	4.99084e-07
0.98297	6.06995e-07	0.98297	5.93231e-07	0.98297	5.0174e-07
0.98541	6.10046e-07	0.98541	5.96375e-07	0.98541	5.05707e-07
0.98785	6.13708e-07	0.98785	5.9903e-07	0.98785	5.09247e-07
0.9903	6.16455e-07	0.9903	6.00922e-07	0.9903	5.12177e-07
0.99274	6.19507e-07	0.99274	6.04553e-07	0.99274	5.18097e-07
0.99518	6.22864e-07	0.99518	6.06689e-07	0.99518	5.23346e-07
0.99762	6.26526e-07	0.99762	6.11267e-07	0.99762	5.26031e-07
1.00006	6.29578e-07	1.00006	6.14929e-07	1.00006	5.30487e-07
1.0025	6.3324e-07	1.0025	6.20117e-07	1.0025	5.33936e-07
1.00494	6.36597e-07	1.00494	6.23474e-07	1.00494	5.35797e-07
1.00739	6.40564e-07	1.00739	6.28967e-07	1.00739	5.40344e-07
1.00983	6.44226e-07	1.00983	6.3324e-07	1.00983	5.44617e-07
1.01227	6.47888e-07	1.01227	6.38428e-07	1.01227	5.49011e-07
1.01471	6.5033e-07	1.01471	6.44531e-07	1.01471	5.51025e-07
1.01715	6.54602e-07	1.01715	6.49719e-07	1.01715	5.55145e-07
1.01959	6.56433e-07	1.01959	6.54907e-07	1.01959	5.58807e-07
1.02203	6.5979e-07	1.02203	6.604e-07	1.02203	5.64758e-07
1.02448	6.61621e-07	1.02448	6.65894e-07	1.02448	5.69397e-07
1.02692	6.64978e-07	1.02692	6.71997e-07	1.02692	5.74493e-07
1.02936	6.66504e-07	1.02936	6.75659e-07	1.02936	5.79529e-07
1.0318	6.70776e-07	1.0318	6.81152e-07	1.0318	5.85358e-07
1.03424	6.73828e-07	1.03424	6.8573e-07	1.03424	5.89752e-07
1.03668	6.77795e-07	1.03668	6.91833e-07	1.03668	5.96008e-07
1.03912	6.81152e-07	1.03912	6.96106e-07	1.03912	5.99548e-07
1.04156	6.8512e-07	1.04156	7.02209e-07	1.04156	6.0434e-07
1.04401	6.88171e-07	1.04401	7.07397e-07	1.04401	6.0791e-07
1.04645	6.92749e-07	1.04645	7.12585e-07	1.04645	6.13708e-07
1.04889	6.94885e-07	1.04889	7.17468e-07	1.04889	6.19812e-07
1.05133	6.97937e-07	1.05133	7.23877e-07	1.05133	6.25305e-07
1.05377	7.01599e-07	1.05377	7.2998e-07	1.05377	6.28662e-07
1.05621	7.05261e-07	1.05621	7.35474e-07	1.05621	6.34766e-07
1.05865	7.08313e-07	1.05865	7.41577e-07	1.05865	6.38733e-07
1.0611	7.13501e-07	1.0611	7.48291e-07	1.0611	6.45142e-07
1.06354	7.17468e-07	1.06354	7.53479e-07	1.06354	6.49109e-07
1.06598	7.2113e-07	1.06598	7.59888e-07	1.06598	6.55212e-07
1.06842	7.23877e-07	1.06842	7.66907e-07	1.06842	6.60706e-07
1.07086	7.28455e-07	1.07086	7.75452e-07	1.07086	6.65894e-07
1.0733	7.30591e-07	1.0733	7.8125e-07	1.0733	6.71997e-07
1.07574	7.34558e-07	1.07574	7.87659e-07	1.07574	6.75964e-07
1.07819	7.39136e-07	1.07819	7.95898e-07	1.07819	6.80542e-07
1.08063	7.42798e-07	1.08063	8.05359e-07	1.08063	6.83594e-07
1.08307	7.48291e-07	1.08307	8.14209e-07	1.08307	6.89087e-07
1.08551	7.52869e-07	1.08551	8.23364e-07	1.08551	6.94885e-07
1.08795	7.57751e-07	1.08795	8.3313e-07	1.08795	6.99463e-07
1.09039	7.62939e-07	1.09039	8.4198e-07	1.09039	7.05261e-07
1.09283	7.68127e-07	1.09283	8.52356e-07	1.09283	7.10144e-07
1.09528	7.7179e-07	1.09528	8.62122e-07	1.09528	7.15942e-07
1.09772	7.76062e-07	1.09772	8.70056e-07	1.09772	7.23877e-07
1.10016	7.79419e-07	1.10016	8.78296e-07	1.10016	7.30591e-07
1.1026	7.84302e-07	1.1026	8.87756e-07	1.1026	7.36694e-07
1.10504	7.88269e-07	1.10504	8.96606e-07	1.10504	7.44934e-07
1.10748	7.92847e-07	1.10748	9.06677e-07	1.10748	7.51953e-07
1.10992	7.96814e-07	1.10992	9.16138e-07	1.10992	7.59583e-07
1.11237	8.02002e-07	1.11237	9.24377e-07	1.11237	7.68127e-07
1.11481	8.0658e-07	1.11481	9.35059e-07	1.11481	7.75757e-07
1.11725	8.09631e-07	1.11725	9.45435e-07	1.11725	7.83081e-07
1.11969	8.13904e-07	1.11969	9.552e-07	1.11969	7.91931e-07
1.12213	8.19397e-07	1.12213	9.68933e-07	1.12213	7.99255e-07
1.12457	8.2428e-07	1.12457	9.8175e-07	1.12457	8.078e-07
1.12701	8.28552e-07	1.12701	9.92737e-07	1.12701	8.17871e-07
1.12946	8.3313e-07	1.12946	1.00555e-06	1.12946	8.27026e-07
1.1319	8.37402e-07	1.1319	1.01196e-06	1.1319	8.34961e-07
1.13434	8.42285e-07	1.13434	1.02539e-06	1.13434	8.42896e-07
1.13678	8.47168e-07	1.13678	1.0379e-06	1.13678	8.52051e-07
1.13922	8.52051e-07	1.13922	1.05011e-06	1.13922	8.62122e-07
1.14166	8.56934e-07	1.14166	1.06171e-06	1.14166	8.71277e-07
1.1441	8.61816e-07	1.1441	1.07422e-06	1.1441	8.80127e-07
1.14655	8.65784e-07	1.14655	1.08734e-06	1.14655	8.91724e-07
1.14899	8.70972e-07	1.14899	1.09833e-06	1.14899	9.03015e-07
1.15143	8.73108e-07	1.15143	1.11176e-06	1.15143	9.1217e-07
1.15387	8.76465e-07	1.15387	1.12427e-06	1.15387	9.23462e-07
1.15631	8.81042e-07	1.15631	1.13708e-06	1.15631	9.33533e-07
1.15875	8.8623e-07	1.15875	1.1496e-06	1.15875	9.46045e-07
1.16119	8.89893e-07	1.16119	1.16089e-06	1.16119	9.57336e-07
1.16364	8.94775e-07	1.16364	1.17432e-06	1.16364	9.69543e-07
1.16608	8.99353e-07	1.16608	1.1853e-06	1.16608	9.79614e-07
1.16852	9.04541e-07	1.16852	1.19873e-06	1.16852	9.93042e-07
1.17096	9.09119e-07	1.17096	1.21216e-06	1.17096	1.00647e-06
1.1734	9.14917e-07	1.1734	1.22498e-06	1.1734	1.01837e-06
1.17584	9.20105e-07	1.17584	1.23779e-06	1.17584	1.03149e-06
1.17828	9.25598e-07	1.17828	1.25061e-06	1.17828	1.04065e-06
1.18073	9.30481e-07	1.18073	1.26587e-06	1.18073	1.05072e-06
1.18317	9.35059e-07	1.18317	1.28235e-06	1.18317	1.06384e-06
1.18561	9.40857e-07	1.18561	1.29669e-06	1.18561	1.07391e-06
1.18805	9.46045e-07	1.18805	1.31378e-06	1.18805	1.08673e-06
1.19049	9.50623e-07	1.19049	1.33118e-06	1.19049	1.09802e-06
1.19293	9.56726e-07	1.19293	1.34766e-06	1.19293	1.10901e-06
1.19537	9.62524e-07	1.19537	1.36169e-06	1.19537	1.12152e-06
1.19781	9.68018e-07	1.19781	1.37817e-06	1.19781	1.13586e-06
1.20026	9.73206e-07	1.20026	1.39313e-06	1.20026	1.14929e-06
1.2027	9.79004e-07	1.2027	1.40961e-06	1.2027	1.16455e-06
1.20514	9.83582e-07	1.20514	1.42578e-06	1.20514	1.17767e-06
1.20758	9.90295e-07	1.20758	1.44073e-06	1.20758	1.19476e-06
1.21002	9.95178e-07	1.21002	1.45752e-06	1.21002	1.20514e-06
1.21246	1.00281e-06	1.21246	1.47552e-06	1.21246	1.22009e-06
1.2149	1.0083e-06	1.2149	1.49506e-06	1.2149	1.23413e-06
1.21735	1.01501e-06	1.21735	1.51337e-06	1.21735	1.24756e-06
1.21979	1.02081e-06	1.21979	1.53198e-06	1.21979	1.26282e-06
1.22223	1.02478e-06	1.22223	1.54968e-06	1.22223	1.27716e-06
1.22467	1.03088e-06	1.22467	1.57043e-06	1.22467	1.29059e-06
1.22711	1.03699e-06	1.22711	1.59027e-06	1.22711	1.30585e-06
1.22955	1.04401e-06	1.22955	1.60645e-06	1.22955	1.31927e-06
1.23199	1.05011e-06	1.23199	1.62506e-06	1.23199	1.33575e-06
1.23444	1.05469e-06	1.23444	1.64703e-06	1.23444	1.35193e-06
1.23688	1.05988e-06	1.23688	1.66504e-06	1.23688	1.36688e-06
1.23932	1.06659e-06	1.23932	1.68274e-06	1.23932	1.38519e-06
1.24176	1.073e-06	1.24176	1.70258e-06	1.24176	1.40381e-06
1.2442	1.07941e-06	1.2442	1.72119e-06	1.2442	1.41846e-06
1.24664	1.08582e-06	1.24664	1.74347e-06	1.24664	1.43341e-06
1.24908	1.09283e-06	1.24908	1.763e-06	1.24908	1.44867e-06
1.25153	1.09955e-06	1.25153	1.78436e-06	1.25153	1.46454e-06
1.25397	1.10565e-06	1.25397	1.80359e-06	1.25397	1.47766e-06
1.25641	1.11267e-06	1.25641	1.8222e-06	1.25641	1.4917e-06
1.25885	1.12e-06	1.25885	1.84021e-06	1.25885	1.50787e-06
1.26129	1.1264e-06	1.26129	1.86218e-06	1.26129	1.52557e-06
1.26373	1.13159e-06	1.26373	1.88202e-06	1.26373	1.54022e-06
1.26617	1.13892e-06	1.26617	1.90491e-06	1.26617	1.55792e-06
1.26862	1.14655e-06	1.26862	1.92078e-06	1.26862	1.57715e-06
1.27106	1.15417e-06	1.27106	1.94397e-06	1.27106	1.59576e-06
1.2735	1.16089e-06	1.2735	1.97113e-06	1.2735	1.61041e-06
1.27594	1.16669e-06	1.27594	1.99371e-06	1.27594	1.62689e-06
1.27838	1.17401e-06	1.27838	2.01569e-06	1.27838	1.6449e-06
1.28082	1.18103e-06	1.28082	2.0343e-06	1.28082	1.66321e-06
1.28326	1.18683e-06	1.28326	2.05261e-06	1.28326	1.68182e-06
1.28571	1.19293e-06	1.28571	2.06573e-06	1.28571	1.70135e-06
1.28815	1.19904e-06	1.28815	2.08313e-06	1.28815	1.71722e-06
1.29059	1.20605e-06	1.29059	2.10419e-06	1.29059	1.73492e-06
1.29303	1.21338e-06	1.29303	2.12219e-06	1.29303	1.75354e-06
1.29547	1.22101e-06	1.29547	2.14508e-06	1.29547	1.77124e-06
1.29791	1.22955e-06	1.29791	2.16431e-06	1.29791	1.78986e-06
1.30035	1.23749e-06	1.30035	2.1817e-06	1.30035	1.80878e-06
1.3028	1.24451e-06	1.3028	2.20093e-06	1.3028	1.82434e-06
1.30524	1.25153e-06	1.30524	2.22168e-06	1.30524	1.84204e-06
1.30768	1.25793e-06	1.30768	2.24152e-06	1.30768	1.85822e-06
1.31012	1.26556e-06	1.31012	2.26227e-06	1.31012	1.87622e-06
1.31256	1.27167e-06	1.31256	2.2818e-06	1.31256	1.89575e-06
1.315	1.2793e-06	1.315	2.30438e-06	1.315	1.91101e-06
1.31744	1.28662e-06	1.31744	2.32574e-06	1.31744	1.93115e-06
1.31989	1.29303e-06	1.31989	2.35168e-06	1.31989	1.94885e-06
1.32233	1.30066e-06	1.32233	2.38037e-06	1.32233	1.96625e-06
1.32477	1.30798e-06	1.32477	2.40509e-06	1.32477	1.98547e-06
1.32721	1.31531e-06	1.32721	2.42493e-06	1.32721	2.00104e-06
1.32965	1.32599e-06	1.32965	2.44659e-06	1.32965	2.01935e-06
1.33209	1.33453e-06	1.33209	2.46887e-06	1.33209	2.03888e-06
1.33453	1.34247e-06	1.33453	2.49054e-06	1.33453	2.05597e-06
1.33698	1.34979e-06	1.33698	2.51434e-06	1.33698	2.07611e-06
1.33942	1.35925e-06	1.33942	2.53815e-06	1.33942	2.09198e-06
1.34186	1.36749e-06	1.34186	2.56195e-06	1.34186	2.1109e-06
1.3443	1.37634e-06	1.3443	2.58942e-06	1.3443	2.13104e-06
1.34674	1.38367e-06	1.34674	2.61444e-06	1.34674	2.14813e-06
1.34918	1.39008e-06	1.34918	2.64313e-06	1.34918	2.16858e-06
1.35162	1.39832e-06	1.35162	2.66937e-06	1.35162	2.18689e-06
1.35406	1.40747e-06	1.35406	2.6947e-06	1.35406	2.20642e-06
1.35651	1.41602e-06	1.35651	2.72278e-06	1.35651	2.22687e-06
1.35895	1.42426e-06	1.35895	2.74567e-06	1.35895	2.24823e-06
1.36139	1.43341e-06	1.36139	2.77039e-06	1.36139	2.26624e-06
1.36383	1.44257e-06	1.36383	2.79785e-06	1.36383	2.28027e-06
1.36627	1.45111e-06	1.36627	2.81921e-06	1.36627	2.29614e-06
1.36871	1.45935e-06	1.36871	2.84363e-06	1.36871	2.31628e-06
1.37115	1.4679e-06	1.37115	2.86774e-06	1.37115	2.33795e-06
1.3736	1.47797e-06	1.3736	2.89368e-06	1.3736	2.36084e-06
1.37604	1.48682e-06	1.37604	2.92236e-06	1.37604	2.37976e-06
1.37848	1.49719e-06	1.37848	2.95227e-06	1.37848	2.40021e-06
1.38092	1.50604e-06	1.38092	2.97791e-06	1.38092	2.4173e-06
1.38336	1.5155e-06	1.38336	3.00568e-06	1.38336	2.43896e-06
1.3858	1.52374e-06	1.3858	3.02734e-06	1.3858	2.46094e-06
1.38824	1.53442e-06	1.38824	3.04871e-06	1.38824	2.48566e-06
1.39069	1.54449e-06	1.39069	3.07312e-06	1.39069	2.50732e-06
1.39313	1.55518e-06	1.39313	3.10059e-06	1.39313	2.53265e-06
1.39557	1.56494e-06	1.39557	3.12561e-06	1.39557	2.55157e-06
1.39801	1.57532e-06	1.39801	3.15674e-06	1.39801	2.57385e-06
1.40045	1.58325e-06	1.40045	3.18787e-06	1.40045	2.59735e-06
1.40289	1.59454e-06	1.40289	3.22632e-06	1.40289	2.6181e-06
1.40533	1.60522e-06	1.40533	3.25348e-06	1.40533	2.63763e-06
1.40778	1.61499e-06	1.40778	3.28156e-06	1.40778	2.66144e-06
1.41022	1.62659e-06	1.41022	3.30872e-06	1.41022	2.68524e-06
1.41266	1.63574e-06	1.41266	3.33893e-06	1.41266	2.70752e-06
1.4151	1.64734e-06	1.4151	3.37097e-06	1.4151	2.73193e-06
1.41754	1.65771e-06	1.41754	3.39844e-06	1.41754	2.75848e-06
1.41998	1.66473e-06	1.41998	3.42224e-06	1.41998	2.77985e-06
1.42242	1.67725e-06	1.42242	3.4491e-06	1.42242	2.80853e-06
1.42487	1.6864e-06	1.42487	3.48053e-06	1.42487	2.83203e-06
1.42731	1.698e-06	1.42731	3.51349e-06	1.42731	2.85828e-06
1.42975	1.70593e-06	1.42975	3.54584e-06	1.42975	2.88116e-06
1.43219	1.71661e-06	1.43219	3.57971e-06	1.43219	2.91077e-06
1.43463	1.72821e-06	1.43463	3.61084e-06	1.43463	2.94037e-06
1.43707	1.7395e-06	1.43707	3.64655e-06	1.43707	2.96967e-06
1.43951	1.75049e-06	1.43951	3.68195e-06	1.43951	2.99957e-06
1.44196	1.76178e-06	1.44196	3.72467e-06	1.44196	3.02979e-06
1.4444	1.77307e-06	1.4444	3.76984e-06	1.4444	3.05908e-06
1.44684	1.7865e-06	1.44684	3.81042e-06	1.44684	3.08411e-06
1.44928	1.79718e-06	1.44928	3.84949e-06	1.44928	3.11401e-06
1.45172	1.81e-06	1.45172	3.89496e-06	1.45172	3.14423e-06
1.45416	1.82281e-06	1.45416	3.92639e-06	1.45416	3.17963e-06
1.4566	1.83563e-06	1.4566	3.96393e-06	1.4566	3.21381e-06
1.45905	1.84692e-06	1.45905	4.00208e-06	1.45905	3.25104e-06
1.46149	1.85852e-06	1.46149	4.04236e-06	1.46149	3.28247e-06
1.46393	1.86829e-06	1.46393	4.086e-06	1.46393	3.3194e-06
1.46637	1.88141e-06	1.46637	4.12689e-06	1.46637	3.35297e-06
1.46881	1.8927e-06	1.46881	4.16962e-06	1.46881	3.38837e-06
1.47125	1.90582e-06	1.47125	4.21387e-06	1.47125	3.42499e-06
1.47369	1.91833e-06	1.47369	4.25995e-06	1.47369	3.46344e-06
1.47614	1.93237e-06	1.47614	4.30359e-06	1.47614	3.49884e-06
1.47858	1.94672e-06	1.47858	4.36127e-06	1.47858	3.54065e-06
1.48102	1.96106e-06	1.48102	4.39758e-06	1.48102	3.58093e-06
1.48346	1.9751e-06	1.48346	4.44794e-06	1.48346	3.61572e-06
1.4859	1.98761e-06	1.4859	4.47937e-06	1.4859	3.65295e-06
1.48834	2.00134e-06	1.48834	4.51538e-06	1.48834	3.6972e-06
1.49078	2.01294e-06	1.49078	4.56055e-06	1.49078	3.74054e-06
1.49323	2.02545e-06	1.49323	4.60754e-06	1.49323	3.77991e-06
1.49567	2.03979e-06	1.49567	4.64233e-06	1.49567	3.82538e-06
1.49811	2.05292e-06	1.49811	4.68414e-06	1.49811	3.86658e-06
1.50055	2.06696e-06	1.50055	4.73724e-06	1.50055	3.90808e-06

## Sheet: Figure S10(b)
-1.4975	-9.99969e-06	-1.4975	-9.99969e-06	-1.4975	-9.99969e-06
-1.49506	-9.47266e-06	-1.49506	-8.46863e-06	-1.49506	-9.56726e-06
-1.49261	-7.83691e-06	-1.49261	-6.97632e-06	-1.49261	-8.08716e-06
-1.49017	-6.79321e-06	-1.49017	-6.01807e-06	-1.49017	-7.11365e-06
-1.48773	-6.07605e-06	-1.48773	-5.34058e-06	-1.48773	-6.40869e-06
-1.48529	-5.52979e-06	-1.48529	-4.83093e-06	-1.48529	-5.87463e-06
-1.48285	-5.12695e-06	-1.48285	-4.44458e-06	-1.48285	-5.45654e-06
-1.48041	-4.80957e-06	-1.48041	-4.12781e-06	-1.48041	-5.12085e-06
-1.47797	-4.54742e-06	-1.47797	-3.86841e-06	-1.47797	-4.83093e-06
-1.47552	-4.32068e-06	-1.47552	-3.64563e-06	-1.47552	-4.5874e-06
-1.47308	-4.12384e-06	-1.47308	-3.45551e-06	-1.47308	-4.37378e-06
-1.47064	-3.95172e-06	-1.47064	-3.29285e-06	-1.47064	-4.1864e-06
-1.4682	-3.79364e-06	-1.4682	-3.14087e-06	-1.4682	-4.02069e-06
-1.46576	-3.65051e-06	-1.46576	-3.01147e-06	-1.46576	-3.87451e-06
-1.46332	-3.5202e-06	-1.46332	-2.89642e-06	-1.46332	-3.7384e-06
-1.46088	-3.4021e-06	-1.46088	-2.78625e-06	-1.46088	-3.62549e-06
-1.45844	-3.30292e-06	-1.45844	-2.6886e-06	-1.45844	-3.51288e-06
-1.45599	-3.21533e-06	-1.45599	-2.60071e-06	-1.45599	-3.41125e-06
-1.45355	-3.12866e-06	-1.45355	-2.52045e-06	-1.45355	-3.3136e-06
-1.45111	-3.03619e-06	-1.45111	-2.44507e-06	-1.45111	-3.22601e-06
-1.44867	-2.95502e-06	-1.44867	-2.37488e-06	-1.44867	-3.14667e-06
-1.44623	-2.88727e-06	-1.44623	-2.30835e-06	-1.44623	-3.07587e-06
-1.44379	-2.82013e-06	-1.44379	-2.25281e-06	-1.44379	-3.00751e-06
-1.44135	-2.75635e-06	-1.44135	-2.19482e-06	-1.44135	-2.94037e-06
-1.4389	-2.69623e-06	-1.4389	-2.13531e-06	-1.4389	-2.87689e-06
-1.43646	-2.63916e-06	-1.43646	-2.08557e-06	-1.43646	-2.81372e-06
-1.43402	-2.58301e-06	-1.43402	-2.03827e-06	-1.43402	-2.75757e-06
-1.43158	-2.53265e-06	-1.43158	-1.99982e-06	-1.43158	-2.70233e-06
-1.42914	-2.48657e-06	-1.42914	-1.95679e-06	-1.42914	-2.64557e-06
-1.4267	-2.43988e-06	-1.4267	-1.91742e-06	-1.4267	-2.60742e-06
-1.42426	-2.39014e-06	-1.42426	-1.87836e-06	-1.42426	-2.55707e-06
-1.42181	-2.3465e-06	-1.42181	-1.84174e-06	-1.42181	-2.51129e-06
-1.41937	-2.30469e-06	-1.41937	-1.80878e-06	-1.41937	-2.4704e-06
-1.41693	-2.26471e-06	-1.41693	-1.77979e-06	-1.41693	-2.43073e-06
-1.41449	-2.22412e-06	-1.41449	-1.74683e-06	-1.41449	-2.388e-06
-1.41205	-2.1875e-06	-1.41205	-1.71539e-06	-1.41205	-2.34894e-06
-1.40961	-2.15393e-06	-1.40961	-1.68732e-06	-1.40961	-2.31445e-06
-1.40717	-2.11578e-06	-1.40717	-1.65222e-06	-1.40717	-2.27875e-06
-1.40472	-2.08099e-06	-1.40472	-1.6272e-06	-1.40472	-2.24335e-06
-1.40228	-2.05353e-06	-1.40228	-1.61438e-06	-1.40228	-2.21252e-06
-1.39984	-2.02393e-06	-1.39984	-1.58325e-06	-1.39984	-2.1817e-06
-1.3974	-1.98822e-06	-1.3974	-1.56281e-06	-1.3974	-2.15302e-06
-1.39496	-1.95984e-06	-1.39496	-1.53687e-06	-1.39496	-2.1228e-06
-1.39252	-1.94031e-06	-1.39252	-1.51093e-06	-1.39252	-2.09167e-06
-1.39008	-1.91132e-06	-1.39008	-1.4856e-06	-1.39008	-2.06085e-06
-1.38763	-1.88293e-06	-1.38763	-1.46423e-06	-1.38763	-2.03705e-06
-1.38519	-1.85394e-06	-1.38519	-1.44257e-06	-1.38519	-2.01233e-06
-1.38275	-1.82892e-06	-1.38275	-1.42029e-06	-1.38275	-1.98608e-06
-1.38031	-1.79962e-06	-1.38031	-1.40137e-06	-1.38031	-1.96228e-06
-1.37787	-1.77338e-06	-1.37787	-1.38153e-06	-1.37787	-1.93939e-06
-1.37543	-1.74805e-06	-1.37543	-1.36597e-06	-1.37543	-1.91681e-06
-1.37299	-1.72882e-06	-1.37299	-1.34705e-06	-1.37299	-1.88995e-06
-1.37054	-1.70654e-06	-1.37054	-1.32782e-06	-1.37054	-1.87073e-06
-1.3681	-1.67786e-06	-1.3681	-1.31042e-06	-1.3681	-1.84998e-06
-1.36566	-1.65588e-06	-1.36566	-1.29791e-06	-1.36566	-1.82831e-06
-1.36322	-1.63452e-06	-1.36322	-1.28326e-06	-1.36322	-1.80847e-06
-1.36078	-1.61713e-06	-1.36078	-1.26831e-06	-1.36078	-1.79016e-06
-1.35834	-1.59668e-06	-1.35834	-1.25458e-06	-1.35834	-1.77032e-06
-1.3559	-1.5802e-06	-1.3559	-1.23749e-06	-1.3559	-1.7514e-06
-1.35345	-1.55823e-06	-1.35345	-1.22437e-06	-1.35345	-1.73157e-06
-1.35101	-1.53687e-06	-1.35101	-1.21033e-06	-1.35101	-1.71265e-06
-1.34857	-1.51489e-06	-1.34857	-1.1969e-06	-1.34857	-1.6925e-06
-1.34613	-1.49719e-06	-1.34613	-1.18195e-06	-1.34613	-1.67358e-06
-1.34369	-1.48132e-06	-1.34369	-1.16821e-06	-1.34369	-1.65405e-06
-1.34125	-1.46942e-06	-1.34125	-1.1557e-06	-1.34125	-1.63788e-06
-1.33881	-1.45294e-06	-1.33881	-1.14258e-06	-1.33881	-1.62201e-06
-1.33636	-1.43066e-06	-1.33636	-1.12762e-06	-1.33636	-1.60553e-06
-1.33392	-1.41602e-06	-1.33392	-1.11542e-06	-1.33392	-1.59241e-06
-1.33148	-1.39465e-06	-1.33148	-1.10504e-06	-1.33148	-1.58051e-06
-1.32904	-1.37756e-06	-1.32904	-1.09467e-06	-1.32904	-1.56494e-06
-1.3266	-1.36108e-06	-1.3266	-1.0849e-06	-1.3266	-1.54846e-06
-1.32416	-1.34186e-06	-1.32416	-1.0733e-06	-1.32416	-1.53015e-06
-1.32172	-1.32965e-06	-1.32172	-1.06445e-06	-1.32172	-1.51672e-06
-1.31927	-1.31317e-06	-1.31927	-1.05225e-06	-1.31927	-1.50146e-06
-1.31683	-1.29761e-06	-1.31683	-1.04187e-06	-1.31683	-1.48865e-06
-1.31439	-1.28723e-06	-1.31439	-1.02936e-06	-1.31439	-1.47675e-06
-1.31195	-1.27258e-06	-1.31195	-1.01715e-06	-1.31195	-1.45996e-06
-1.30951	-1.26495e-06	-1.30951	-1.00677e-06	-1.30951	-1.44714e-06
-1.30707	-1.24969e-06	-1.30707	-1.00006e-06	-1.30707	-1.43982e-06
-1.30463	-1.23474e-06	-1.30463	-9.8999e-07	-1.30463	-1.42792e-06
-1.30219	-1.2204e-06	-1.30219	-9.8114e-07	-1.30219	-1.41693e-06
-1.29974	-1.2085e-06	-1.29974	-9.73206e-07	-1.29974	-1.4032e-06
-1.2973	-1.19568e-06	-1.2973	-9.63745e-07	-1.2973	-1.38763e-06
-1.29486	-1.18286e-06	-1.29486	-9.56116e-07	-1.29486	-1.3739e-06
-1.29242	-1.16913e-06	-1.29242	-9.47266e-07	-1.29242	-1.36017e-06
-1.28998	-1.15784e-06	-1.28998	-9.39026e-07	-1.28998	-1.34796e-06
-1.28754	-1.14716e-06	-1.28754	-9.31091e-07	-1.28754	-1.33911e-06
-1.2851	-1.13434e-06	-1.2851	-9.22241e-07	-1.2851	-1.33087e-06
-1.28265	-1.12579e-06	-1.28265	-9.15222e-07	-1.28265	-1.3205e-06
-1.28021	-1.1145e-06	-1.28021	-9.05762e-07	-1.28021	-1.31165e-06
-1.27777	-1.10291e-06	-1.27777	-8.97522e-07	-1.27777	-1.29913e-06
-1.27533	-1.09222e-06	-1.27533	-8.90503e-07	-1.27533	-1.28754e-06
-1.27289	-1.08276e-06	-1.27289	-8.82568e-07	-1.27289	-1.27655e-06
-1.27045	-1.07178e-06	-1.27045	-8.74023e-07	-1.27045	-1.26801e-06
-1.26801	-1.06628e-06	-1.26801	-8.66699e-07	-1.26801	-1.25824e-06
-1.26556	-1.05865e-06	-1.26556	-8.5968e-07	-1.26556	-1.24878e-06
-1.26312	-1.04675e-06	-1.26312	-8.5144e-07	-1.26312	-1.23932e-06
-1.26068	-1.03485e-06	-1.26068	-8.45947e-07	-1.26068	-1.23077e-06
-1.25824	-1.02234e-06	-1.25824	-8.39539e-07	-1.25824	-1.22192e-06
-1.2558	-1.01105e-06	-1.2558	-8.32825e-07	-1.2558	-1.21155e-06
-1.25336	-1.00098e-06	-1.25336	-8.26111e-07	-1.25336	-1.20026e-06
-1.25092	-9.90906e-07	-1.25092	-8.20618e-07	-1.25092	-1.18958e-06
-1.24847	-9.80835e-07	-1.24847	-8.13293e-07	-1.24847	-1.17981e-06
-1.24603	-9.7168e-07	-1.24603	-8.10547e-07	-1.24603	-1.17401e-06
-1.24359	-9.6405e-07	-1.24359	-8.05054e-07	-1.24359	-1.16608e-06
-1.24115	-9.55811e-07	-1.24115	-7.96509e-07	-1.24115	-1.15509e-06
-1.23871	-9.46045e-07	-1.23871	-7.91016e-07	-1.23871	-1.1438e-06
-1.23627	-9.39026e-07	-1.23627	-7.87354e-07	-1.23627	-1.13556e-06
-1.23383	-9.32922e-07	-1.23383	-7.79419e-07	-1.23383	-1.13129e-06
-1.23138	-9.26208e-07	-1.23138	-7.74841e-07	-1.23138	-1.1264e-06
-1.22894	-9.18579e-07	-1.22894	-7.68127e-07	-1.22894	-1.11664e-06
-1.2265	-9.11865e-07	-1.2265	-7.6355e-07	-1.2265	-1.10718e-06
-1.22406	-9.06372e-07	-1.22406	-7.58057e-07	-1.22406	-1.09894e-06
-1.22162	-8.98132e-07	-1.22162	-7.53479e-07	-1.22162	-1.091e-06
-1.21918	-8.89587e-07	-1.21918	-7.50122e-07	-1.21918	-1.08093e-06
-1.21674	-8.80127e-07	-1.21674	-7.44324e-07	-1.21674	-1.07422e-06
-1.21429	-8.71277e-07	-1.21429	-7.40662e-07	-1.21429	-1.06781e-06
-1.21185	-8.60901e-07	-1.21185	-7.33948e-07	-1.21185	-1.05988e-06
-1.20941	-8.53271e-07	-1.20941	-7.2937e-07	-1.20941	-1.05347e-06
-1.20697	-8.44421e-07	-1.20697	-7.26013e-07	-1.20697	-1.04553e-06
-1.20453	-8.38623e-07	-1.20453	-7.19299e-07	-1.20453	-1.0376e-06
-1.20209	-8.32214e-07	-1.20209	-7.14417e-07	-1.20209	-1.03241e-06
-1.19965	-8.25195e-07	-1.19965	-7.08008e-07	-1.19965	-1.02478e-06
-1.1972	-8.17566e-07	-1.1972	-7.03125e-07	-1.1972	-1.01776e-06
-1.19476	-8.12378e-07	-1.19476	-6.97937e-07	-1.19476	-1.01074e-06
-1.19232	-8.06885e-07	-1.19232	-6.9458e-07	-1.19232	-1.00311e-06
-1.18988	-7.97424e-07	-1.18988	-6.89697e-07	-1.18988	-9.96399e-07
-1.18744	-7.91626e-07	-1.18744	-6.8512e-07	-1.18744	-9.92737e-07
-1.185	-7.83997e-07	-1.185	-6.77795e-07	-1.185	-9.86938e-07
-1.18256	-7.76978e-07	-1.18256	-6.73218e-07	-1.18256	-9.8053e-07
-1.18011	-7.69043e-07	-1.18011	-6.70471e-07	-1.18011	-9.73206e-07
-1.17767	-7.6355e-07	-1.17767	-6.65894e-07	-1.17767	-9.65271e-07
-1.17523	-7.56836e-07	-1.17523	-6.62537e-07	-1.17523	-9.59167e-07
-1.17279	-7.52258e-07	-1.17279	-6.57959e-07	-1.17279	-9.54285e-07
-1.17035	-7.4646e-07	-1.17035	-6.56433e-07	-1.17035	-9.46655e-07
-1.16791	-7.40967e-07	-1.16791	-6.51855e-07	-1.16791	-9.39636e-07
-1.16547	-7.36084e-07	-1.16547	-6.47278e-07	-1.16547	-9.32617e-07
-1.16302	-7.31506e-07	-1.16302	-6.43311e-07	-1.16302	-9.27429e-07
-1.16058	-7.27844e-07	-1.16058	-6.39648e-07	-1.16058	-9.21936e-07
-1.15814	-7.22961e-07	-1.15814	-6.36902e-07	-1.15814	-9.18274e-07
-1.1557	-7.16553e-07	-1.1557	-6.33545e-07	-1.1557	-9.12781e-07
-1.15326	-7.10449e-07	-1.15326	-6.28357e-07	-1.15326	-9.08203e-07
-1.15082	-7.04956e-07	-1.15082	-6.22864e-07	-1.15082	-9.02405e-07
-1.14838	-7.01904e-07	-1.14838	-6.18591e-07	-1.14838	-8.98743e-07
-1.14594	-6.97327e-07	-1.14594	-6.16455e-07	-1.14594	-8.92334e-07
-1.14349	-6.90002e-07	-1.14349	-6.13708e-07	-1.14349	-8.88672e-07
-1.14105	-6.85425e-07	-1.14105	-6.09131e-07	-1.14105	-8.84094e-07
-1.13861	-6.81458e-07	-1.13861	-6.05164e-07	-1.13861	-8.77991e-07
-1.13617	-6.74133e-07	-1.13617	-6.02112e-07	-1.13617	-8.73413e-07
-1.13373	-6.67114e-07	-1.13373	-5.9906e-07	-1.13373	-8.6853e-07
-1.13129	-6.60706e-07	-1.13129	-5.95093e-07	-1.13129	-8.63037e-07
-1.12885	-6.56128e-07	-1.12885	-5.93262e-07	-1.12885	-8.54492e-07
-1.1264	-6.51245e-07	-1.1264	-5.88989e-07	-1.1264	-8.49915e-07
-1.12396	-6.46973e-07	-1.12396	-5.85938e-07	-1.12396	-8.47778e-07
-1.12152	-6.43005e-07	-1.12152	-5.83191e-07	-1.12152	-8.4259e-07
-1.11908	-6.37207e-07	-1.11908	-5.79834e-07	-1.11908	-8.37708e-07
-1.11664	-6.32935e-07	-1.11664	-5.77087e-07	-1.11664	-8.31299e-07
-1.1142	-6.28357e-07	-1.1142	-5.74341e-07	-1.1142	-8.27332e-07
-1.11176	-6.22864e-07	-1.11176	-5.70374e-07	-1.11176	-8.20923e-07
-1.10931	-6.17981e-07	-1.10931	-5.66406e-07	-1.10931	-8.17871e-07
-1.10687	-6.11877e-07	-1.10687	-5.63354e-07	-1.10687	-8.12988e-07
-1.10443	-6.07605e-07	-1.10443	-5.60913e-07	-1.10443	-8.08716e-07
-1.10199	-6.03638e-07	-1.10199	-5.57251e-07	-1.10199	-8.03528e-07
-1.09955	-5.99976e-07	-1.09955	-5.5481e-07	-1.09955	-7.99866e-07
-1.09711	-5.96008e-07	-1.09711	-5.51147e-07	-1.09711	-7.95593e-07
-1.09467	-5.92651e-07	-1.09467	-5.4718e-07	-1.09467	-7.90405e-07
-1.09222	-5.87463e-07	-1.09222	-5.45959e-07	-1.09222	-7.901e-07
-1.08978	-5.82886e-07	-1.08978	-5.41992e-07	-1.08978	-7.85828e-07
-1.08734	-5.75562e-07	-1.08734	-5.38635e-07	-1.08734	-7.82166e-07
-1.0849	-5.71594e-07	-1.0849	-5.36499e-07	-1.0849	-7.76062e-07
-1.08246	-5.67627e-07	-1.08246	-5.33752e-07	-1.08246	-7.72095e-07
-1.08002	-5.61829e-07	-1.08002	-5.30701e-07	-1.08002	-7.67212e-07
-1.07758	-5.57251e-07	-1.07758	-5.27954e-07	-1.07758	-7.63245e-07
-1.07513	-5.54504e-07	-1.07513	-5.24902e-07	-1.07513	-7.57446e-07
-1.07269	-5.50232e-07	-1.07269	-5.22766e-07	-1.07269	-7.52563e-07
-1.07025	-5.4657e-07	-1.07025	-5.19104e-07	-1.07025	-7.50122e-07
-1.06781	-5.43518e-07	-1.06781	-5.16357e-07	-1.06781	-7.48596e-07
-1.06537	-5.39856e-07	-1.06537	-5.13611e-07	-1.06537	-7.42798e-07
-1.06293	-5.36499e-07	-1.06293	-5.11475e-07	-1.06293	-7.39441e-07
-1.06049	-5.31921e-07	-1.06049	-5.08118e-07	-1.06049	-7.35779e-07
-1.05804	-5.27649e-07	-1.05804	-5.0354e-07	-1.05804	-7.31812e-07
-1.0556	-5.24292e-07	-1.0556	-5.00793e-07	-1.0556	-7.26013e-07
-1.05316	-5.19104e-07	-1.05316	-4.99268e-07	-1.05316	-7.21741e-07
-1.05072	-5.15442e-07	-1.05072	-4.953e-07	-1.05072	-7.19604e-07
-1.04828	-5.12085e-07	-1.04828	-4.91028e-07	-1.04828	-7.17468e-07
-1.04584	-5.06592e-07	-1.04584	-4.89197e-07	-1.04584	-7.12891e-07
-1.0434	-5.01709e-07	-1.0434	-4.87976e-07	-1.0434	-7.08313e-07
-1.04095	-4.97742e-07	-1.04095	-4.84497e-07	-1.04095	-7.04651e-07
-1.03851	-4.93774e-07	-1.03851	-4.82483e-07	-1.03851	-7.01294e-07
-1.03607	-4.91333e-07	-1.03607	-4.80316e-07	-1.03607	-6.97021e-07
-1.03363	-4.87671e-07	-1.03363	-4.7644e-07	-1.03363	-6.93359e-07
-1.03119	-4.83704e-07	-1.03119	-4.73297e-07	-1.03119	-6.90613e-07
-1.02875	-4.7934e-07	-1.02875	-4.7113e-07	-1.02875	-6.88782e-07
-1.02631	-4.74731e-07	-1.02631	-4.68811e-07	-1.02631	-6.86035e-07
-1.02386	-4.71436e-07	-1.02386	-4.65698e-07	-1.02386	-6.81763e-07
-1.02142	-4.68414e-07	-1.02142	-4.64111e-07	-1.02142	-6.78101e-07
-1.01898	-4.6521e-07	-1.01898	-4.61761e-07	-1.01898	-6.75659e-07
-1.01654	-4.62189e-07	-1.01654	-4.59595e-07	-1.01654	-6.71387e-07
-1.0141	-4.5813e-07	-1.0141	-4.56665e-07	-1.0141	-6.67725e-07
-1.01166	-4.53979e-07	-1.01166	-4.53918e-07	-1.01166	-6.63757e-07
-1.00922	-4.48975e-07	-1.00922	-4.51477e-07	-1.00922	-6.5979e-07
-1.00677	-4.44489e-07	-1.00677	-4.48486e-07	-1.00677	-6.54907e-07
-1.00433	-4.40796e-07	-1.00433	-4.4693e-07	-1.00433	-6.53381e-07
-1.00189	-4.38171e-07	-1.00189	-4.44458e-07	-1.00189	-6.49414e-07
-0.99945	-4.34143e-07	-0.99945	-4.40765e-07	-0.99945	-6.46362e-07
-0.99701	-4.31091e-07	-0.99701	-4.38843e-07	-0.99701	-6.42395e-07
-0.99457	-4.27155e-07	-0.99457	-4.36249e-07	-0.99457	-6.38123e-07
-0.99213	-4.23889e-07	-0.99213	-4.3338e-07	-0.99213	-6.36902e-07
-0.98969	-4.20898e-07	-0.98969	-4.31946e-07	-0.98969	-6.36292e-07
-0.98724	-4.16351e-07	-0.98724	-4.28711e-07	-0.98724	-6.32629e-07
-0.9848	-4.13239e-07	-0.9848	-4.26849e-07	-0.9848	-6.28967e-07
-0.98236	-4.09637e-07	-0.98236	-4.24133e-07	-0.98236	-6.26526e-07
-0.97992	-4.0625e-07	-0.97992	-4.22394e-07	-0.97992	-6.22559e-07
-0.97748	-4.03137e-07	-0.97748	-4.19495e-07	-0.97748	-6.18591e-07
-0.97504	-4.01306e-07	-0.97504	-4.16779e-07	-0.97504	-6.16455e-07
-0.9726	-3.97827e-07	-0.9726	-4.15466e-07	-0.9726	-6.13708e-07
-0.97015	-3.94897e-07	-0.97015	-4.1272e-07	-0.97015	-6.10046e-07
-0.96771	-3.9209e-07	-0.96771	-4.09821e-07	-0.96771	-6.08521e-07
-0.96527	-3.88336e-07	-0.96527	-4.08173e-07	-0.96527	-6.04858e-07
-0.96283	-3.8562e-07	-0.96283	-4.06067e-07	-0.96283	-6.02417e-07
-0.96039	-3.81866e-07	-0.96039	-4.04144e-07	-0.96039	-5.9967e-07
-0.95795	-3.78571e-07	-0.95795	-4.021e-07	-0.95795	-5.97229e-07
-0.95551	-3.75732e-07	-0.95551	-3.99445e-07	-0.95551	-5.94177e-07
-0.95306	-3.73657e-07	-0.95306	-3.97095e-07	-0.95306	-5.90515e-07
-0.95062	-3.70667e-07	-0.95062	-3.94623e-07	-0.95062	-5.88379e-07
-0.94818	-3.67706e-07	-0.94818	-3.92365e-07	-0.94818	-5.86243e-07
-0.94574	-3.64136e-07	-0.94574	-3.89771e-07	-0.94574	-5.82886e-07
-0.9433	-3.61389e-07	-0.9433	-3.87848e-07	-0.9433	-5.79834e-07
-0.94086	-3.57666e-07	-0.94086	-3.85315e-07	-0.94086	-5.76172e-07
-0.93842	-3.54309e-07	-0.93842	-3.82477e-07	-0.93842	-5.74646e-07
-0.93597	-3.50159e-07	-0.93597	-3.80951e-07	-0.93597	-5.7251e-07
-0.93353	-3.47321e-07	-0.93353	-3.79486e-07	-0.93353	-5.71289e-07
-0.93109	-3.4314e-07	-0.93109	-3.76343e-07	-0.93109	-5.66711e-07
-0.92865	-3.3844e-07	-0.92865	-3.73962e-07	-0.92865	-5.64575e-07
-0.92621	-3.35632e-07	-0.92621	-3.71704e-07	-0.92621	-5.59692e-07
-0.92377	-3.32428e-07	-0.92377	-3.69598e-07	-0.92377	-5.59387e-07
-0.92133	-3.29041e-07	-0.92133	-3.68103e-07	-0.92133	-5.5542e-07
-0.91888	-3.26172e-07	-0.91888	-3.65753e-07	-0.91888	-5.52673e-07
-0.91644	-3.22601e-07	-0.91644	-3.63922e-07	-0.91644	-5.50842e-07
-0.914	-3.20343e-07	-0.914	-3.61969e-07	-0.914	-5.4718e-07
-0.91156	-3.17566e-07	-0.91156	-3.591e-07	-0.91156	-5.44739e-07
-0.90912	-3.14178e-07	-0.90912	-3.5672e-07	-0.90912	-5.40771e-07
-0.90668	-3.11523e-07	-0.90668	-3.55194e-07	-0.90668	-5.36804e-07
-0.90424	-3.08807e-07	-0.90424	-3.5379e-07	-0.90424	-5.34058e-07
-0.90179	-3.05573e-07	-0.90179	-3.51624e-07	-0.90179	-5.32532e-07
-0.89935	-3.02551e-07	-0.89935	-3.49823e-07	-0.89935	-5.29785e-07
-0.89691	-2.99408e-07	-0.89691	-3.47382e-07	-0.89691	-5.29785e-07
-0.89447	-2.96661e-07	-0.89447	-3.45367e-07	-0.89447	-5.26733e-07
-0.89203	-2.93732e-07	-0.89203	-3.43018e-07	-0.89203	-5.23682e-07
-0.88959	-2.901e-07	-0.88959	-3.41156e-07	-0.88959	-5.21851e-07
-0.88715	-2.87781e-07	-0.88715	-3.39203e-07	-0.88715	-5.17578e-07
-0.8847	-2.84027e-07	-0.8847	-3.36578e-07	-0.8847	-5.14221e-07
-0.88226	-2.82135e-07	-0.88226	-3.35205e-07	-0.88226	-5.12085e-07
-0.87982	-2.80121e-07	-0.87982	-3.33801e-07	-0.87982	-5.10559e-07
-0.87738	-2.76917e-07	-0.87738	-3.31909e-07	-0.87738	-5.07202e-07
-0.87494	-2.7475e-07	-0.87494	-3.29529e-07	-0.87494	-5.03845e-07
-0.8725	-2.72278e-07	-0.8725	-3.27393e-07	-0.8725	-5.01404e-07
-0.87006	-2.70233e-07	-0.87006	-3.25378e-07	-0.87006	-4.98352e-07
-0.86761	-2.66998e-07	-0.86761	-3.22845e-07	-0.86761	-4.94995e-07
-0.86517	-2.63794e-07	-0.86517	-3.21411e-07	-0.86517	-4.92249e-07
-0.86273	-2.6178e-07	-0.86273	-3.19702e-07	-0.86273	-4.90723e-07
-0.86029	-2.58057e-07	-0.86029	-3.18024e-07	-0.86029	-4.88892e-07
-0.85785	-2.55463e-07	-0.85785	-3.16345e-07	-0.85785	-4.84955e-07
-0.85541	-2.52502e-07	-0.85541	-3.14941e-07	-0.85541	-4.81842e-07
-0.85297	-2.50336e-07	-0.85297	-3.12988e-07	-0.85297	-4.80743e-07
-0.85052	-2.47528e-07	-0.85052	-3.11066e-07	-0.85052	-4.77783e-07
-0.84808	-2.45453e-07	-0.84808	-3.09174e-07	-0.84808	-4.74182e-07
-0.84564	-2.43805e-07	-0.84564	-3.06671e-07	-0.84564	-4.71619e-07
-0.8432	-2.4118e-07	-0.8432	-3.04352e-07	-0.8432	-4.69727e-07
-0.84076	-2.39197e-07	-0.84076	-3.03253e-07	-0.84076	-4.67468e-07
-0.83832	-2.3642e-07	-0.83832	-3.01117e-07	-0.83832	-4.6405e-07
-0.83588	-2.33917e-07	-0.83588	-3.00415e-07	-0.83588	-4.6225e-07
-0.83344	-2.31171e-07	-0.83344	-2.98492e-07	-0.83344	-4.59717e-07
-0.83099	-2.27295e-07	-0.83099	-2.96967e-07	-0.83099	-4.5694e-07
-0.82855	-2.24854e-07	-0.82855	-2.9483e-07	-0.82855	-4.53705e-07
-0.82611	-2.2226e-07	-0.82611	-2.94037e-07	-0.82611	-4.50378e-07
-0.82367	-2.19635e-07	-0.82367	-2.92145e-07	-0.82367	-4.48273e-07
-0.82123	-2.17957e-07	-0.82123	-2.89703e-07	-0.82123	-4.45251e-07
-0.81879	-2.14874e-07	-0.81879	-2.88483e-07	-0.81879	-4.42932e-07
-0.81635	-2.13165e-07	-0.81635	-2.86957e-07	-0.81635	-4.40613e-07
-0.8139	-2.10632e-07	-0.8139	-2.85034e-07	-0.8139	-4.38232e-07
-0.81146	-2.07916e-07	-0.81146	-2.83234e-07	-0.81146	-4.3573e-07
-0.80902	-2.06451e-07	-0.80902	-2.81036e-07	-0.80902	-4.33167e-07
-0.80658	-2.04041e-07	-0.80658	-2.80243e-07	-0.80658	-4.32251e-07
-0.80414	-2.02423e-07	-0.80414	-2.78595e-07	-0.80414	-4.28986e-07
-0.8017	-2.00562e-07	-0.8017	-2.77161e-07	-0.8017	-4.2746e-07
-0.79926	-1.98181e-07	-0.79926	-2.75269e-07	-0.79926	-4.25354e-07
-0.79681	-1.9635e-07	-0.79681	-2.73804e-07	-0.79681	-4.24225e-07
-0.79437	-1.94e-07	-0.79437	-2.72949e-07	-0.79437	-4.21692e-07
-0.79193	-1.92047e-07	-0.79193	-2.71118e-07	-0.79193	-4.20349e-07
-0.78949	-1.89819e-07	-0.78949	-2.69348e-07	-0.78949	-4.16412e-07
-0.78705	-1.8808e-07	-0.78705	-2.67792e-07	-0.78705	-4.14459e-07
-0.78461	-1.85455e-07	-0.78461	-2.66418e-07	-0.78461	-4.12354e-07
-0.78217	-1.83441e-07	-0.78217	-2.65472e-07	-0.78217	-4.09058e-07
-0.77972	-1.81732e-07	-0.77972	-2.63947e-07	-0.77972	-4.07104e-07
-0.77728	-1.80084e-07	-0.77728	-2.62726e-07	-0.77728	-4.04816e-07
-0.77484	-1.77795e-07	-0.77484	-2.60803e-07	-0.77484	-4.02161e-07
-0.7724	-1.75995e-07	-0.7724	-2.59064e-07	-0.7724	-3.98712e-07
-0.76996	-1.74103e-07	-0.76996	-2.57172e-07	-0.76996	-3.96912e-07
-0.76752	-1.72791e-07	-0.76752	-2.55493e-07	-0.76752	-3.94775e-07
-0.76508	-1.7038e-07	-0.76508	-2.54181e-07	-0.76508	-3.93127e-07
-0.76263	-1.68762e-07	-0.76263	-2.52533e-07	-0.76263	-3.90839e-07
-0.76019	-1.67145e-07	-0.76019	-2.51099e-07	-0.76019	-3.88855e-07
-0.75775	-1.65497e-07	-0.75775	-2.49603e-07	-0.75775	-3.86383e-07
-0.75531	-1.6394e-07	-0.75531	-2.47864e-07	-0.75531	-3.83301e-07
-0.75287	-1.62476e-07	-0.75287	-2.46948e-07	-0.75287	-3.81989e-07
-0.75043	-1.60889e-07	-0.75043	-2.45514e-07	-0.75043	-3.80219e-07
-0.74799	-1.59241e-07	-0.74799	-2.44629e-07	-0.74799	-3.77899e-07
-0.74554	-1.5744e-07	-0.74554	-2.42828e-07	-0.74554	-3.76068e-07
-0.7431	-1.56036e-07	-0.7431	-2.41882e-07	-0.7431	-3.72833e-07
-0.74066	-1.54114e-07	-0.74066	-2.40112e-07	-0.74066	-3.71094e-07
-0.73822	-1.52832e-07	-0.73822	-2.38373e-07	-0.73822	-3.68652e-07
-0.73578	-1.51093e-07	-0.73578	-2.36694e-07	-0.73578	-3.67767e-07
-0.73334	-1.49933e-07	-0.73334	-2.3584e-07	-0.73334	-3.66394e-07
-0.7309	-1.49048e-07	-0.7309	-2.34222e-07	-0.7309	-3.638e-07
-0.72845	-1.47675e-07	-0.72845	-2.33124e-07	-0.72845	-3.61206e-07
-0.72601	-1.46515e-07	-0.72601	-2.31079e-07	-0.72601	-3.59283e-07
-0.72357	-1.46149e-07	-0.72357	-2.30103e-07	-0.72357	-3.57666e-07
-0.72113	-1.44531e-07	-0.72113	-2.28668e-07	-0.72113	-3.54492e-07
-0.71869	-1.4386e-07	-0.71869	-2.27417e-07	-0.71869	-3.52112e-07
-0.71625	-1.42883e-07	-0.71625	-2.25708e-07	-0.71625	-3.49548e-07
-0.71381	-1.41418e-07	-0.71381	-2.25067e-07	-0.71381	-3.48724e-07
-0.71136	-1.4035e-07	-0.71136	-2.24304e-07	-0.71136	-3.46405e-07
-0.70892	-1.38916e-07	-0.70892	-2.22321e-07	-0.70892	-3.44513e-07
-0.70648	-1.3678e-07	-0.70648	-2.20642e-07	-0.70648	-3.43475e-07
-0.70404	-1.34735e-07	-0.70404	-2.18689e-07	-0.70404	-3.41278e-07
-0.7016	-1.33209e-07	-0.7016	-2.17041e-07	-0.7016	-3.38898e-07
-0.69916	-1.31592e-07	-0.69916	-2.16156e-07	-0.69916	-3.37616e-07
-0.69672	-1.29944e-07	-0.69672	-2.15149e-07	-0.69672	-3.35602e-07
-0.69427	-1.28967e-07	-0.69427	-2.13562e-07	-0.69427	-3.3429e-07
-0.69183	-1.28052e-07	-0.69183	-2.12158e-07	-0.69183	-3.32245e-07
-0.68939	-1.26862e-07	-0.68939	-2.10938e-07	-0.68939	-3.29346e-07
-0.68695	-1.25977e-07	-0.68695	-2.099e-07	-0.68695	-3.27667e-07
-0.68451	-1.25641e-07	-0.68451	-2.0871e-07	-0.68451	-3.26202e-07
-0.68207	-1.24451e-07	-0.68207	-2.0694e-07	-0.68207	-3.2431e-07
-0.67963	-1.23505e-07	-0.67963	-2.06146e-07	-0.67963	-3.22662e-07
-0.67719	-1.22467e-07	-0.67719	-2.05383e-07	-0.67719	-3.20587e-07
-0.67474	-1.21918e-07	-0.67474	-2.03949e-07	-0.67474	-3.19244e-07
-0.6723	-1.20789e-07	-0.6723	-2.02423e-07	-0.6723	-3.1781e-07
-0.66986	-1.19446e-07	-0.66986	-2.00989e-07	-0.66986	-3.15491e-07
-0.66742	-1.18073e-07	-0.66742	-1.99432e-07	-0.66742	-3.13049e-07
-0.66498	-1.17218e-07	-0.66498	-1.97937e-07	-0.66498	-3.11768e-07
-0.66254	-1.15753e-07	-0.66254	-1.96899e-07	-0.66254	-3.10181e-07
-0.6601	-1.14594e-07	-0.6601	-1.95953e-07	-0.6601	-3.08868e-07
-0.65765	-1.13342e-07	-0.65765	-1.94855e-07	-0.65765	-3.07526e-07
-0.65521	-1.12457e-07	-0.65521	-1.93146e-07	-0.65521	-3.05847e-07
-0.65277	-1.11359e-07	-0.65277	-1.91986e-07	-0.65277	-3.02887e-07
-0.65033	-1.10779e-07	-0.65033	-1.90826e-07	-0.65033	-3.00751e-07
-0.64789	-1.0968e-07	-0.64789	-1.89514e-07	-0.64789	-2.98859e-07
-0.64545	-1.091e-07	-0.64545	-1.88385e-07	-0.64545	-2.97668e-07
-0.64301	-1.08093e-07	-0.64301	-1.86859e-07	-0.64301	-2.9599e-07
-0.64056	-1.0733e-07	-0.64056	-1.85303e-07	-0.64056	-2.94037e-07
-0.63812	-1.06415e-07	-0.63812	-1.84174e-07	-0.63812	-2.92572e-07
-0.63568	-1.05133e-07	-0.63568	-1.83411e-07	-0.63568	-2.90466e-07
-0.63324	-1.04279e-07	-0.63324	-1.82251e-07	-0.63324	-2.89001e-07
-0.6308	-1.03607e-07	-0.6308	-1.80939e-07	-0.6308	-2.87537e-07
-0.62836	-1.02661e-07	-0.62836	-1.79565e-07	-0.62836	-2.86407e-07
-0.62592	-1.01868e-07	-0.62592	-1.78375e-07	-0.62592	-2.84729e-07
-0.62347	-1.01288e-07	-0.62347	-1.77002e-07	-0.62347	-2.8302e-07
-0.62103	-1.00586e-07	-0.62103	-1.76758e-07	-0.62103	-2.8067e-07
-0.61859	-9.97925e-08	-0.61859	-1.7453e-07	-0.61859	-2.79297e-07
-0.61615	-9.92432e-08	-0.61615	-1.73462e-07	-0.61615	-2.78198e-07
-0.61371	-9.85107e-08	-0.61371	-1.72485e-07	-0.61371	-2.76764e-07
-0.61127	-9.77173e-08	-0.61127	-1.71417e-07	-0.61127	-2.74445e-07
-0.60883	-9.67712e-08	-0.60883	-1.70319e-07	-0.60883	-2.72858e-07
-0.60638	-9.61304e-08	-0.60638	-1.68915e-07	-0.60638	-2.71576e-07
-0.60394	-9.51233e-08	-0.60394	-1.67542e-07	-0.60394	-2.70111e-07
-0.6015	-9.42688e-08	-0.6015	-1.66107e-07	-0.6015	-2.68616e-07
-0.59906	-9.33228e-08	-0.59906	-1.65344e-07	-0.59906	-2.66846e-07
-0.59662	-9.24377e-08	-0.59662	-1.6394e-07	-0.59662	-2.65778e-07
-0.59418	-9.19189e-08	-0.59418	-1.62445e-07	-0.59418	-2.64038e-07
-0.59174	-9.12476e-08	-0.59174	-1.61407e-07	-0.59174	-2.63245e-07
-0.58929	-9.04541e-08	-0.58929	-1.60309e-07	-0.58929	-2.60834e-07
-0.58685	-8.99048e-08	-0.58685	-1.58844e-07	-0.58685	-2.59644e-07
-0.58441	-8.90503e-08	-0.58441	-1.57654e-07	-0.58441	-2.57782e-07
-0.58197	-8.80737e-08	-0.58197	-1.56403e-07	-0.58197	-2.56683e-07
-0.57953	-8.77075e-08	-0.57953	-1.55182e-07	-0.57953	-2.55493e-07
-0.57709	-8.70667e-08	-0.57709	-1.54449e-07	-0.57709	-2.5351e-07
-0.57465	-8.64563e-08	-0.57465	-1.5332e-07	-0.57465	-2.51038e-07
-0.5722	-8.57544e-08	-0.5722	-1.52161e-07	-0.5722	-2.50305e-07
-0.56976	-8.50525e-08	-0.56976	-1.51001e-07	-0.56976	-2.48108e-07
-0.56732	-8.44116e-08	-0.56732	-1.49384e-07	-0.56732	-2.46735e-07
-0.56488	-8.37097e-08	-0.56488	-1.48499e-07	-0.56488	-2.45056e-07
-0.56244	-8.28857e-08	-0.56244	-1.47766e-07	-0.56244	-2.43591e-07
-0.56	-8.21228e-08	-0.56	-1.46576e-07	-0.56	-2.42279e-07
-0.55756	-8.11768e-08	-0.55756	-1.45172e-07	-0.55756	-2.40509e-07
-0.55511	-8.06274e-08	-0.55511	-1.43768e-07	-0.55511	-2.388e-07
-0.55267	-7.94678e-08	-0.55267	-1.42792e-07	-0.55267	-2.36786e-07
-0.55023	-7.86133e-08	-0.55023	-1.41724e-07	-0.55023	-2.35443e-07
-0.54779	-7.78503e-08	-0.54779	-1.40717e-07	-0.54779	-2.33795e-07
-0.54535	-7.72095e-08	-0.54535	-1.3916e-07	-0.54535	-2.32635e-07
-0.54291	-7.66907e-08	-0.54291	-1.38458e-07	-0.54291	-2.30469e-07
-0.54047	-7.58667e-08	-0.54047	-1.37299e-07	-0.54047	-2.28973e-07
-0.53802	-7.52869e-08	-0.53802	-1.35986e-07	-0.53802	-2.27234e-07
-0.53558	-7.44019e-08	-0.53558	-1.35162e-07	-0.53558	-2.25677e-07
-0.53314	-7.37915e-08	-0.53314	-1.34125e-07	-0.53314	-2.24121e-07
-0.5307	-7.25708e-08	-0.5307	-1.32263e-07	-0.5307	-2.22778e-07
-0.52826	-7.1991e-08	-0.52826	-1.3092e-07	-0.52826	-2.22168e-07
-0.52582	-7.1106e-08	-0.52582	-1.29791e-07	-0.52582	-2.21161e-07
-0.52338	-7.04956e-08	-0.52338	-1.29425e-07	-0.52338	-2.19727e-07
-0.52094	-6.97327e-08	-0.52094	-1.28113e-07	-0.52094	-2.18384e-07
-0.51849	-6.88477e-08	-0.51849	-1.27319e-07	-0.51849	-2.16705e-07
-0.51605	-6.81763e-08	-0.51605	-1.25519e-07	-0.51605	-2.14752e-07
-0.51361	-6.76575e-08	-0.51361	-1.24237e-07	-0.51361	-2.1283e-07
-0.51117	-6.69556e-08	-0.51117	-1.23627e-07	-0.51117	-2.11487e-07
-0.50873	-6.64368e-08	-0.50873	-1.22955e-07	-0.50873	-2.0993e-07
-0.50629	-6.58264e-08	-0.50629	-1.21613e-07	-0.50629	-2.08191e-07
-0.50385	-6.52161e-08	-0.50385	-1.20636e-07	-0.50385	-2.06879e-07
-0.5014	-6.46057e-08	-0.5014	-1.19415e-07	-0.5014	-2.05414e-07
-0.49896	-6.36902e-08	-0.49896	-1.1792e-07	-0.49896	-2.04041e-07
-0.49652	-6.35986e-08	-0.49652	-1.17188e-07	-0.49652	-2.0285e-07
-0.49408	-6.28967e-08	-0.49408	-1.16119e-07	-0.49408	-2.01324e-07
-0.49164	-6.2561e-08	-0.49164	-1.14563e-07	-0.49164	-1.99463e-07
-0.4892	-6.17371e-08	-0.4892	-1.138e-07	-0.4892	-1.97906e-07
-0.48676	-6.11267e-08	-0.48676	-1.12366e-07	-0.48676	-1.97021e-07
-0.48431	-6.04858e-08	-0.48431	-1.11542e-07	-0.48431	-1.9577e-07
-0.48187	-5.98755e-08	-0.48187	-1.10229e-07	-0.48187	-1.9458e-07
-0.47943	-5.9021e-08	-0.47943	-1.09222e-07	-0.47943	-1.92688e-07
-0.47699	-5.84717e-08	-0.47699	-1.08002e-07	-0.47699	-1.90582e-07
-0.47455	-5.79834e-08	-0.47455	-1.07147e-07	-0.47455	-1.89789e-07
-0.47211	-5.7373e-08	-0.47211	-1.05957e-07	-0.47211	-1.88354e-07
-0.46967	-5.69763e-08	-0.46967	-1.05072e-07	-0.46967	-1.86951e-07
-0.46722	-5.63354e-08	-0.46722	-1.04034e-07	-0.46722	-1.8515e-07
-0.46478	-5.56335e-08	-0.46478	-1.02936e-07	-0.46478	-1.83868e-07
-0.46234	-5.53284e-08	-0.46234	-1.02142e-07	-0.46234	-1.82617e-07
-0.4599	-5.4718e-08	-0.4599	-1.00922e-07	-0.4599	-1.81305e-07
-0.45746	-5.39551e-08	-0.45746	-1.00098e-07	-0.45746	-1.80084e-07
-0.45502	-5.32227e-08	-0.45502	-9.92432e-08	-0.45502	-1.78741e-07
-0.45258	-5.23682e-08	-0.45258	-9.79309e-08	-0.45258	-1.77032e-07
-0.45013	-5.16357e-08	-0.45013	-9.68628e-08	-0.45013	-1.75659e-07
-0.44769	-5.09949e-08	-0.44769	-9.55505e-08	-0.44769	-1.74194e-07
-0.44525	-5.02014e-08	-0.44525	-9.39331e-08	-0.44525	-1.7276e-07
-0.44281	-4.98657e-08	-0.44281	-9.27124e-08	-0.44281	-1.71234e-07
-0.44037	-4.92249e-08	-0.44037	-9.21631e-08	-0.44037	-1.70013e-07
-0.43793	-4.8645e-08	-0.43793	-9.06982e-08	-0.43793	-1.6806e-07
-0.43549	-4.80347e-08	-0.43549	-8.99353e-08	-0.43549	-1.66992e-07
-0.43304	-4.75464e-08	-0.43304	-8.88062e-08	-0.43304	-1.65192e-07
-0.4306	-4.66919e-08	-0.4306	-8.80432e-08	-0.4306	-1.63849e-07
-0.42816	-4.62341e-08	-0.42816	-8.72803e-08	-0.42816	-1.62933e-07
-0.42572	-4.55627e-08	-0.42572	-8.66089e-08	-0.42572	-1.61438e-07
-0.42328	-4.51355e-08	-0.42328	-8.53577e-08	-0.42328	-1.60614e-07
-0.42084	-4.45557e-08	-0.42084	-8.4137e-08	-0.42084	-1.59241e-07
-0.4184	-4.37317e-08	-0.4184	-8.34351e-08	-0.4184	-1.5744e-07
-0.41595	-4.31824e-08	-0.41595	-8.22754e-08	-0.41595	-1.56158e-07
-0.41351	-4.25415e-08	-0.41351	-8.13904e-08	-0.41351	-1.54938e-07
-0.41107	-4.18701e-08	-0.41107	-8.02917e-08	-0.41107	-1.53778e-07
-0.40863	-4.10767e-08	-0.40863	-7.87354e-08	-0.40863	-1.52313e-07
-0.40619	-4.01917e-08	-0.40619	-7.75452e-08	-0.40619	-1.51001e-07
-0.40375	-3.95508e-08	-0.40375	-7.6355e-08	-0.40375	-1.49902e-07
-0.40131	-3.87268e-08	-0.40131	-7.54089e-08	-0.40131	-1.48163e-07
-0.39886	-3.8208e-08	-0.39886	-7.42798e-08	-0.39886	-1.46942e-07
-0.39642	-3.7384e-08	-0.39642	-7.2998e-08	-0.39642	-1.45386e-07
-0.39398	-3.66211e-08	-0.39398	-7.19604e-08	-0.39398	-1.43646e-07
-0.39154	-3.60107e-08	-0.39154	-7.12585e-08	-0.39154	-1.42181e-07
-0.3891	-3.51257e-08	-0.3891	-7.0343e-08	-0.3891	-1.41235e-07
-0.38666	-3.44543e-08	-0.38666	-6.92749e-08	-0.38666	-1.39771e-07
-0.38422	-3.38135e-08	-0.38422	-6.84204e-08	-0.38422	-1.38336e-07
-0.38177	-3.30811e-08	-0.38177	-6.75354e-08	-0.38177	-1.37054e-07
-0.37933	-3.23792e-08	-0.37933	-6.64368e-08	-0.37933	-1.35925e-07
-0.37689	-3.16772e-08	-0.37689	-6.5094e-08	-0.37689	-1.34613e-07
-0.37445	-3.08228e-08	-0.37445	-6.40869e-08	-0.37445	-1.33087e-07
-0.37201	-2.99683e-08	-0.37201	-6.31714e-08	-0.37201	-1.31927e-07
-0.36957	-2.93884e-08	-0.36957	-6.21338e-08	-0.36957	-1.30676e-07
-0.36713	-2.8717e-08	-0.36713	-6.14929e-08	-0.36713	-1.29181e-07
-0.36469	-2.78931e-08	-0.36469	-6.06079e-08	-0.36469	-1.27991e-07
-0.36224	-2.72522e-08	-0.36224	-5.95093e-08	-0.36224	-1.26465e-07
-0.3598	-2.63977e-08	-0.3598	-5.79834e-08	-0.3598	-1.24847e-07
-0.35736	-2.57568e-08	-0.35736	-5.70679e-08	-0.35736	-1.23627e-07
-0.35492	-2.52197e-08	-0.35492	-5.61829e-08	-0.35492	-1.22162e-07
-0.35248	-2.453e-08	-0.35248	-5.50232e-08	-0.35248	-1.20911e-07
-0.35004	-2.38129e-08	-0.35004	-5.39856e-08	-0.35004	-1.19385e-07
-0.3476	-2.31262e-08	-0.3476	-5.29175e-08	-0.3476	-1.18103e-07
-0.34515	-2.24396e-08	-0.34515	-5.17883e-08	-0.34515	-1.16608e-07
-0.34271	-2.20215e-08	-0.34271	-5.08728e-08	-0.34271	-1.15509e-07
-0.34027	-2.12585e-08	-0.34027	-5.03235e-08	-0.34027	-1.138e-07
-0.33783	-2.02301e-08	-0.33783	-4.95911e-08	-0.33783	-1.12457e-07
-0.33539	-1.93848e-08	-0.33539	-4.87366e-08	-0.33539	-1.11145e-07
-0.33295	-1.86462e-08	-0.33295	-4.7821e-08	-0.33295	-1.09955e-07
-0.33051	-1.79504e-08	-0.33051	-4.69666e-08	-0.33051	-1.08307e-07
-0.32806	-1.71021e-08	-0.32806	-4.58984e-08	-0.32806	-1.07117e-07
-0.32562	-1.63025e-08	-0.32562	-4.49524e-08	-0.32562	-1.05591e-07
-0.32318	-1.56067e-08	-0.32318	-4.40063e-08	-0.32318	-1.04492e-07
-0.32074	-1.50116e-08	-0.32074	-4.28162e-08	-0.32074	-1.03058e-07
-0.3183	-1.43951e-08	-0.3183	-4.20532e-08	-0.3183	-1.01837e-07
-0.31586	-1.38794e-08	-0.31586	-4.12292e-08	-0.31586	-1.00189e-07
-0.31342	-1.29272e-08	-0.31342	-4.02832e-08	-0.31342	-9.87854e-08
-0.31097	-1.23505e-08	-0.31097	-3.97034e-08	-0.31097	-9.7229e-08
-0.30853	-1.15753e-08	-0.30853	-3.9032e-08	-0.30853	-9.60693e-08
-0.30609	-1.08734e-08	-0.30609	-3.79944e-08	-0.30609	-9.46655e-08
-0.30365	-1.00586e-08	-0.30365	-3.67126e-08	-0.30365	-9.33533e-08
-0.30121	-9.50928e-09	-0.30121	-3.54004e-08	-0.30121	-9.198e-08
-0.29877	-8.64868e-09	-0.29877	-3.43323e-08	-0.29877	-9.06982e-08
-0.29633	-7.93762e-09	-0.29633	-3.34167e-08	-0.29633	-8.92029e-08
-0.29388	-7.35779e-09	-0.29388	-3.24707e-08	-0.29388	-8.78601e-08
-0.29144	-6.71997e-09	-0.29144	-3.15552e-08	-0.29144	-8.63037e-08
-0.289	-6.04248e-09	-0.289	-3.08533e-08	-0.289	-8.52051e-08
-0.28656	-5.35583e-09	-0.28656	-3.01331e-08	-0.28656	-8.37097e-08
-0.28412	-4.74854e-09	-0.28412	-2.93793e-08	-0.28412	-8.23975e-08
-0.28168	-4.00085e-09	-0.28168	-2.85187e-08	-0.28168	-8.09631e-08
-0.27924	-3.50647e-09	-0.27924	-2.75391e-08	-0.27924	-7.97424e-08
-0.27679	-2.77405e-09	-0.27679	-2.72583e-08	-0.27679	-7.80334e-08
-0.27435	-1.97754e-09	-0.27435	-2.6886e-08	-0.27435	-7.68738e-08
-0.27191	-1.51062e-09	-0.27191	-2.57477e-08	-0.27191	-7.5592e-08
-0.26947	-8.75854e-10	-0.26947	-2.45911e-08	-0.26947	-7.43408e-08
-0.26703	-2.53296e-10	-0.26703	-2.40814e-08	-0.26703	-7.31812e-08
-0.26459	3.17383e-10	-0.26459	-2.29889e-08	-0.26459	-7.20825e-08
-0.26215	9.552e-10	-0.26215	-2.20123e-08	-0.26215	-7.03735e-08
-0.2597	1.48315e-09	-0.2597	-2.13379e-08	-0.2597	-6.90918e-08
-0.25726	2.11487e-09	-0.25726	-2.06268e-08	-0.25726	-6.79321e-08
-0.25482	2.66113e-09	-0.25482	-1.99432e-08	-0.25482	-6.66809e-08
-0.25238	3.24707e-09	-0.25238	-1.93756e-08	-0.25238	-6.52771e-08
-0.24994	3.69568e-09	-0.24994	-1.88171e-08	-0.24994	-6.41479e-08
-0.2475	4.27856e-09	-0.2475	-1.81458e-08	-0.2475	-6.27441e-08
-0.24506	4.62952e-09	-0.24506	-1.70776e-08	-0.24506	-6.14624e-08
-0.24261	5.24292e-09	-0.24261	-1.63147e-08	-0.24261	-6.03333e-08
-0.24017	5.56335e-09	-0.24017	-1.55334e-08	-0.24017	-5.89294e-08
-0.23773	6.02417e-09	-0.23773	-1.45203e-08	-0.23773	-5.77698e-08
-0.23529	6.53992e-09	-0.23529	-1.41083e-08	-0.23529	-5.65491e-08
-0.23285	7.12585e-09	-0.23285	-1.35223e-08	-0.23285	-5.51453e-08
-0.23041	7.35779e-09	-0.23041	-1.28235e-08	-0.23041	-5.3833e-08
-0.22797	7.93762e-09	-0.22797	-1.2146e-08	-0.22797	-5.27039e-08
-0.22552	8.42896e-09	-0.22552	-1.15845e-08	-0.22552	-5.16357e-08
-0.22308	8.83789e-09	-0.22308	-1.0675e-08	-0.22308	-5.0415e-08
-0.22064	9.57947e-09	-0.22064	-9.40857e-09	-0.22064	-4.93774e-08
-0.2182	1.00372e-08	-0.2182	-8.74939e-09	-0.2182	-4.80957e-08
-0.21576	1.0376e-08	-0.21576	-8.02307e-09	-0.21576	-4.69055e-08
-0.21332	1.10168e-08	-0.21332	-7.31201e-09	-0.21332	-4.59595e-08
-0.21088	1.13922e-08	-0.21088	-6.94275e-09	-0.21088	-4.49524e-08
-0.20844	1.18622e-08	-0.20844	-6.3385e-09	-0.20844	-4.32434e-08
-0.20599	1.2088e-08	-0.20599	-5.55725e-09	-0.20599	-4.18091e-08
-0.20355	1.25183e-08	-0.20355	-4.75769e-09	-0.20355	-4.07104e-08
-0.20111	1.27686e-08	-0.20111	-4.1748e-09	-0.20111	-3.95203e-08
-0.19867	1.34491e-08	-0.19867	-3.19824e-09	-0.19867	-3.83911e-08
-0.19623	1.37482e-08	-0.19623	-2.62451e-09	-0.19623	-3.74756e-08
-0.19379	1.43433e-08	-0.19379	-2.13318e-09	-0.19379	-3.61328e-08
-0.19135	1.47858e-08	-0.19135	-1.48621e-09	-0.19135	-3.50952e-08
-0.1889	1.50665e-08	-0.1889	-7.38525e-10	-0.1889	-3.40271e-08
-0.18646	1.52802e-08	-0.18646	-1.49536e-10	-0.18646	-3.29407e-08
-0.18402	1.56281e-08	-0.18402	7.41577e-10	-0.18402	-3.18237e-08
-0.18158	1.58173e-08	-0.18158	1.37024e-09	-0.18158	-3.07739e-08
-0.17914	1.67053e-08	-0.17914	1.96228e-09	-0.17914	-2.9953e-08
-0.1767	1.71478e-08	-0.1767	2.54517e-09	-0.1767	-2.9071e-08
-0.17426	1.72485e-08	-0.17426	3.24097e-09	-0.17426	-2.79449e-08
-0.17181	1.73187e-08	-0.17181	4.01001e-09	-0.17181	-2.68829e-08
-0.16937	1.78253e-08	-0.16937	4.7699e-09	-0.16937	-2.59125e-08
-0.16693	1.82129e-08	-0.16693	5.41992e-09	-0.16693	-2.48108e-08
-0.16449	1.85242e-08	-0.16449	5.93872e-09	-0.16449	-2.36633e-08
-0.16205	1.89148e-08	-0.16205	6.57959e-09	-0.16205	-2.27417e-08
-0.15961	1.98639e-08	-0.15961	7.77283e-09	-0.15961	-2.17194e-08
-0.15717	2.03918e-08	-0.15717	8.98438e-09	-0.15717	-2.0813e-08
-0.15472	2.07825e-08	-0.15472	9.13696e-09	-0.15472	-1.98242e-08
-0.15228	2.1106e-08	-0.15228	9.50623e-09	-0.15228	-1.86676e-08
-0.14984	2.18231e-08	-0.14984	1.02448e-08	-0.14984	-1.75873e-08
-0.1474	2.23297e-08	-0.1474	1.08826e-08	-0.1474	-1.65619e-08
-0.14496	2.23877e-08	-0.14496	1.12701e-08	-0.14496	-1.54266e-08
-0.14252	2.24121e-08	-0.14252	1.19324e-08	-0.14252	-1.45111e-08
-0.14008	2.26746e-08	-0.14008	1.27411e-08	-0.14008	-1.33484e-08
-0.13763	2.29156e-08	-0.13763	1.33209e-08	-0.13763	-1.23535e-08
-0.13519	2.33978e-08	-0.13519	1.37573e-08	-0.13519	-1.13129e-08
-0.13275	2.36938e-08	-0.13275	1.41357e-08	-0.13275	-1.04065e-08
-0.13031	2.40784e-08	-0.13031	1.48041e-08	-0.13031	-9.22852e-09
-0.12787	2.46185e-08	-0.12787	1.5567e-08	-0.12787	-8.38928e-09
-0.12543	2.48779e-08	-0.12543	1.62415e-08	-0.12543	-7.51038e-09
-0.12299	2.52594e-08	-0.12299	1.67389e-08	-0.12299	-6.48499e-09
-0.12054	2.57843e-08	-0.12054	1.73676e-08	-0.12054	-5.41687e-09
-0.1181	2.60315e-08	-0.1181	1.78467e-08	-0.1181	-4.5166e-09
-0.11566	2.66113e-08	-0.11566	1.84357e-08	-0.11566	-3.60413e-09
-0.11322	2.67639e-08	-0.11322	1.87134e-08	-0.11322	-2.84424e-09
-0.11078	2.71606e-08	-0.11078	1.91315e-08	-0.11078	-1.81885e-09
-0.10834	2.78259e-08	-0.10834	1.97937e-08	-0.10834	-7.41577e-10
-0.1059	2.82501e-08	-0.1059	2.05872e-08	-0.1059	1.06812e-10
-0.10345	2.86255e-08	-0.10345	2.13165e-08	-0.10345	9.00269e-10
-0.10101	2.89001e-08	-0.10101	2.20459e-08	-0.10101	1.74561e-09
-0.09857	2.90527e-08	-0.09857	2.30316e-08	-0.09857	2.48413e-09
-0.09613	2.96631e-08	-0.09613	2.37549e-08	-0.09613	3.39355e-09
-0.09369	2.98462e-08	-0.09369	2.41058e-08	-0.09369	4.22974e-09
-0.09125	3.0304e-08	-0.09125	2.43561e-08	-0.09125	5.22156e-09
-0.08881	3.09143e-08	-0.08881	2.45453e-08	-0.08881	6.20728e-09
-0.08636	3.13721e-08	-0.08636	2.47406e-08	-0.08636	7.01294e-09
-0.08392	3.17993e-08	-0.08392	2.5235e-08	-0.08392	7.6416e-09
-0.08148	3.19519e-08	-0.08148	2.60071e-08	-0.08148	8.36487e-09
-0.07904	3.2074e-08	-0.07904	2.66205e-08	-0.07904	8.97217e-09
-0.0766	3.23486e-08	-0.0766	2.76367e-08	-0.0766	9.84802e-09
-0.07416	3.25928e-08	-0.07416	2.82745e-08	-0.07416	1.06476e-08
-0.07172	3.28979e-08	-0.07172	2.87109e-08	-0.07172	1.15631e-08
-0.06927	3.29285e-08	-0.06927	2.91351e-08	-0.06927	1.24115e-08
-0.06683	3.31726e-08	-0.06683	2.94739e-08	-0.06683	1.34216e-08
-0.06439	3.31116e-08	-0.06439	3.01819e-08	-0.06439	1.43036e-08
-0.06195	3.34167e-08	-0.06195	3.1601e-08	-0.06195	1.52039e-08
-0.05951	3.33252e-08	-0.05951	3.24707e-08	-0.05951	1.58569e-08
-0.05707	3.36304e-08	-0.05707	3.2959e-08	-0.05707	1.69586e-08
-0.05463	3.3905e-08	-0.05463	3.34167e-08	-0.05463	1.75964e-08
-0.05219	3.41797e-08	-0.05219	3.42407e-08	-0.05219	1.84753e-08
-0.04974	3.49121e-08	-0.04974	3.48206e-08	-0.04974	1.92047e-08
-0.0473	3.50342e-08	-0.0473	3.54919e-08	-0.0473	2.01752e-08
-0.04486	3.61328e-08	-0.04486	3.59192e-08	-0.04486	2.0871e-08
-0.04242	3.67432e-08	-0.04242	3.66516e-08	-0.04242	2.18811e-08
-0.03998	3.7262e-08	-0.03998	3.72925e-08	-0.03998	2.25677e-08
-0.03754	3.78113e-08	-0.03754	3.79639e-08	-0.03754	2.35291e-08
-0.0351	3.8269e-08	-0.0351	3.85437e-08	-0.0351	2.43469e-08
-0.03265	3.86658e-08	-0.03265	3.83606e-08	-0.03265	2.51556e-08
-0.03021	3.92151e-08	-0.03021	3.84521e-08	-0.03021	2.59796e-08
-0.02777	3.91846e-08	-0.02777	3.89099e-08	-0.02777	2.68127e-08
-0.02533	3.97949e-08	-0.02533	3.92151e-08	-0.02533	2.75208e-08
-0.02289	4.01306e-08	-0.02289	4.00391e-08	-0.02289	2.84607e-08
-0.02045	4.04053e-08	-0.02045	4.04053e-08	-0.02045	2.91046e-08
-0.01801	4.07104e-08	-0.01801	4.09241e-08	-0.01801	2.99255e-08
-0.01556	4.09546e-08	-0.01556	4.12292e-08	-0.01556	3.07526e-08
-0.01312	4.15039e-08	-0.01312	4.16565e-08	-0.01312	3.15857e-08
-0.01068	4.18701e-08	-0.01068	4.23584e-08	-0.01068	3.23792e-08
-0.00824	4.21143e-08	-0.00824	4.29382e-08	-0.00824	3.30505e-08
-0.0058	4.22058e-08	-0.0058	4.36096e-08	-0.0058	3.39355e-08
-0.00336	4.24194e-08	-0.00336	4.44031e-08	-0.00336	3.479e-08
-0.000915527	4.28772e-08	-0.000915527	4.52881e-08	-0.000915527	3.54919e-08
0.00153	4.32739e-08	0.00153	4.59595e-08	0.00153	3.62854e-08
0.00397	4.37622e-08	0.00397	4.65088e-08	0.00397	3.71704e-08
0.00641	4.41284e-08	0.00641	4.67224e-08	0.00641	3.79333e-08
0.00885	4.48303e-08	0.00885	4.72412e-08	0.00885	3.86047e-08
0.01129	4.52881e-08	0.01129	4.75464e-08	0.01129	3.92456e-08
0.01373	4.57458e-08	0.01373	4.85535e-08	0.01373	3.98254e-08
0.01617	4.60205e-08	0.01617	4.9469e-08	0.01617	4.10767e-08
0.01862	4.63562e-08	0.01862	4.97131e-08	0.01862	4.11377e-08
0.02106	4.69055e-08	0.02106	5.00793e-08	0.02106	4.18701e-08
0.0235	4.75769e-08	0.0235	5.07202e-08	0.0235	4.23584e-08
0.02594	4.78516e-08	0.02594	5.15442e-08	0.02594	4.29382e-08
0.02838	4.80042e-08	0.02838	5.24597e-08	0.02838	4.38843e-08
0.03082	4.81873e-08	0.03082	5.2948e-08	0.03082	4.47998e-08
0.03326	4.81567e-08	0.03326	5.31921e-08	0.03326	4.51355e-08
0.03571	4.83704e-08	0.03571	5.41687e-08	0.03571	4.62341e-08
0.03815	4.85535e-08	0.03815	5.46265e-08	0.03815	4.71802e-08
0.04059	4.87671e-08	0.04059	5.5481e-08	0.04059	4.7821e-08
0.04303	4.91333e-08	0.04303	5.6488e-08	0.04303	4.84619e-08
0.04547	4.93164e-08	0.04547	5.69763e-08	0.04547	4.96216e-08
0.04791	5.00183e-08	0.04791	5.75256e-08	0.04791	5.07813e-08
0.05035	5.07813e-08	0.05035	5.78003e-08	0.05035	5.17578e-08
0.0528	5.16357e-08	0.0528	5.80139e-08	0.0528	5.23376e-08
0.05524	5.22766e-08	0.05524	5.88379e-08	0.05524	5.31006e-08
0.05768	5.27039e-08	0.05768	5.89294e-08	0.05768	5.35583e-08
0.06012	5.33447e-08	0.06012	5.97839e-08	0.06012	5.45044e-08
0.06256	5.36804e-08	0.06256	6.00281e-08	0.06256	5.52368e-08
0.065	5.3894e-08	0.065	6.08215e-08	0.065	5.56946e-08
0.06744	5.44434e-08	0.06744	6.13403e-08	0.06744	5.65491e-08
0.06989	5.45349e-08	0.06989	6.22864e-08	0.06989	5.77087e-08
0.07233	5.49622e-08	0.07233	6.25916e-08	0.07233	5.83191e-08
0.07477	5.5542e-08	0.07477	6.31104e-08	0.07477	5.86853e-08
0.07721	5.59082e-08	0.07721	6.38733e-08	0.07721	5.91125e-08
0.07965	5.62744e-08	0.07965	6.53992e-08	0.07965	5.99976e-08
0.08209	5.6366e-08	0.08209	6.58875e-08	0.08209	6.04858e-08
0.08453	5.63354e-08	0.08453	6.61621e-08	0.08453	6.10962e-08
0.08698	5.61829e-08	0.08698	6.67419e-08	0.08698	6.17676e-08
0.08942	5.68542e-08	0.08942	6.71387e-08	0.08942	6.25305e-08
0.09186	5.68542e-08	0.09186	6.7749e-08	0.09186	6.35681e-08
0.0943	5.74036e-08	0.0943	6.8512e-08	0.0943	6.43616e-08
0.09674	5.82581e-08	0.09674	6.91223e-08	0.09674	6.49414e-08
0.09918	5.90515e-08	0.09918	7.06177e-08	0.09918	6.60706e-08
0.10162	6.00891e-08	0.10162	7.13501e-08	0.10162	6.64368e-08
0.10406	6.13403e-08	0.10406	7.21741e-08	0.10406	6.75049e-08
0.10651	6.23779e-08	0.10651	7.28455e-08	0.10651	6.82068e-08
0.10895	6.33545e-08	0.10895	7.36084e-08	0.10895	6.92139e-08
0.11139	6.43616e-08	0.11139	7.43408e-08	0.11139	6.98853e-08
0.11383	6.48193e-08	0.11383	7.48291e-08	0.11383	7.08313e-08
0.11627	6.53076e-08	0.11627	7.5592e-08	0.11627	7.17163e-08
0.11871	6.604e-08	0.11871	7.66296e-08	0.11871	7.25098e-08
0.12115	6.67725e-08	0.12115	7.74536e-08	0.12115	7.32117e-08
0.1236	6.74744e-08	0.1236	7.8186e-08	0.1236	7.43408e-08
0.12604	6.81152e-08	0.12604	7.88574e-08	0.12604	7.53479e-08
0.12848	6.88782e-08	0.12848	7.97424e-08	0.12848	7.62024e-08
0.13092	6.96106e-08	0.13092	8.04138e-08	0.13092	7.69348e-08
0.13336	7.03735e-08	0.13336	8.10242e-08	0.13336	7.83386e-08
0.1358	7.08313e-08	0.1358	8.12073e-08	0.1358	7.92847e-08
0.13824	7.22656e-08	0.13824	8.21838e-08	0.13824	8.02307e-08
0.14069	7.30591e-08	0.14069	8.3252e-08	0.14069	8.10852e-08
0.14313	7.36084e-08	0.14313	8.39233e-08	0.14313	8.18176e-08
0.14557	7.44324e-08	0.14557	8.46863e-08	0.14557	8.28857e-08
0.14801	7.48291e-08	0.14801	8.58765e-08	0.14801	8.34045e-08
0.15045	7.47986e-08	0.15045	8.66089e-08	0.15045	8.36792e-08
0.15289	7.51648e-08	0.15289	8.7738e-08	0.15289	8.46863e-08
0.15533	7.547e-08	0.15533	8.8501e-08	0.15533	8.54492e-08
0.15778	7.65686e-08	0.15778	8.92029e-08	0.15778	8.60596e-08
0.16022	7.74231e-08	0.16022	9.0271e-08	0.16022	8.70361e-08
0.16266	7.82166e-08	0.16266	9.1095e-08	0.16266	8.7677e-08
0.1651	7.84607e-08	0.1651	9.17664e-08	0.1651	8.88062e-08
0.16754	7.9071e-08	0.16754	9.28955e-08	0.16754	8.99963e-08
0.16998	7.99255e-08	0.16998	9.38721e-08	0.16998	9.1156e-08
0.17242	8.10852e-08	0.17242	9.50012e-08	0.17242	9.18579e-08
0.17487	8.23669e-08	0.17487	9.60388e-08	0.17487	9.25903e-08
0.17731	8.41064e-08	0.17731	9.68323e-08	0.17731	9.36584e-08
0.17975	8.51135e-08	0.17975	9.72595e-08	0.17975	9.44824e-08
0.18219	8.60291e-08	0.18219	9.85107e-08	0.18219	9.50928e-08
0.18463	8.68835e-08	0.18463	9.96704e-08	0.18463	9.58862e-08
0.18707	8.83484e-08	0.18707	1.0022e-07	0.18707	9.71069e-08
0.18951	8.9447e-08	0.18951	1.00616e-07	0.18951	9.83887e-08
0.19196	9.08203e-08	0.19196	1.01776e-07	0.19196	9.93347e-08
0.1944	9.25293e-08	0.1944	1.02661e-07	0.1944	1.00128e-07
0.19684	9.34753e-08	0.19684	1.03821e-07	0.19684	1.01471e-07
0.19928	9.42688e-08	0.19928	1.04889e-07	0.19928	1.026e-07
0.20172	9.61609e-08	0.20172	1.05133e-07	0.20172	1.04065e-07
0.20416	9.73206e-08	0.20416	1.05865e-07	0.20416	1.05103e-07
0.2066	9.89075e-08	0.2066	1.06628e-07	0.2066	1.06049e-07
0.20905	9.96399e-08	0.20905	1.07605e-07	0.20905	1.07422e-07
0.21149	1.00281e-07	0.21149	1.08368e-07	0.21149	1.08978e-07
0.21393	1.01227e-07	0.21393	1.0849e-07	0.21393	1.0968e-07
0.21637	1.02753e-07	0.21637	1.09222e-07	0.21637	1.11298e-07
0.21881	1.04218e-07	0.21881	1.09467e-07	0.21881	1.12244e-07
0.22125	1.0611e-07	0.22125	1.10352e-07	0.22125	1.12885e-07
0.22369	1.08032e-07	0.22369	1.11267e-07	0.22369	1.13953e-07
0.22614	1.10046e-07	0.22614	1.12396e-07	0.22614	1.15112e-07
0.22858	1.11633e-07	0.22858	1.12915e-07	0.22858	1.16272e-07
0.23102	1.13464e-07	0.23102	1.14166e-07	0.23102	1.18134e-07
0.23346	1.15143e-07	0.23346	1.14716e-07	0.23346	1.1972e-07
0.2359	1.16425e-07	0.2359	1.15173e-07	0.2359	1.20911e-07
0.23834	1.17737e-07	0.23834	1.14929e-07	0.23834	1.22131e-07
0.24078	1.18439e-07	0.24078	1.15753e-07	0.24078	1.23383e-07
0.24323	1.19873e-07	0.24323	1.15814e-07	0.24323	1.24939e-07
0.24567	1.2149e-07	0.24567	1.16394e-07	0.24567	1.26648e-07
0.24811	1.22375e-07	0.24811	1.17004e-07	0.24811	1.27808e-07
0.25055	1.23749e-07	0.25055	1.1734e-07	0.25055	1.29425e-07
0.25299	1.24939e-07	0.25299	1.1792e-07	0.25299	1.30402e-07
0.25543	1.2616e-07	0.25543	1.18774e-07	0.25543	1.31866e-07
0.25787	1.27838e-07	0.25787	1.19202e-07	0.25787	1.32813e-07
0.26031	1.29852e-07	0.26031	1.20087e-07	0.26031	1.33972e-07
0.26276	1.31439e-07	0.26276	1.20758e-07	0.26276	1.35925e-07
0.2652	1.3266e-07	0.2652	1.21368e-07	0.2652	1.37146e-07
0.26764	1.34644e-07	0.26764	1.21765e-07	0.26764	1.38275e-07
0.27008	1.36047e-07	0.27008	1.22223e-07	0.27008	1.39862e-07
0.27252	1.37146e-07	0.27252	1.22589e-07	0.27252	1.40961e-07
0.27496	1.38641e-07	0.27496	1.23657e-07	0.27496	1.42639e-07
0.2774	1.39984e-07	0.2774	1.2381e-07	0.2774	1.43768e-07
0.27985	1.41693e-07	0.27985	1.24237e-07	0.27985	1.4505e-07
0.28229	1.43555e-07	0.28229	1.24756e-07	0.28229	1.45935e-07
0.28473	1.45508e-07	0.28473	1.25458e-07	0.28473	1.47278e-07
0.28717	1.47278e-07	0.28717	1.25824e-07	0.28717	1.48651e-07
0.28961	1.49353e-07	0.28961	1.26282e-07	0.28961	1.50238e-07
0.29205	1.50818e-07	0.29205	1.26801e-07	0.29205	1.51764e-07
0.29449	1.52618e-07	0.29449	1.27411e-07	0.29449	1.52679e-07
0.29694	1.53717e-07	0.29694	1.27808e-07	0.29694	1.53809e-07
0.29938	1.56036e-07	0.29938	1.28754e-07	0.29938	1.55396e-07
0.30182	1.57471e-07	0.30182	1.29364e-07	0.30182	1.5683e-07
0.30426	1.59058e-07	0.30426	1.30096e-07	0.30426	1.58234e-07
0.3067	1.60431e-07	0.3067	1.30615e-07	0.3067	1.58783e-07
0.30914	1.61377e-07	0.30914	1.3147e-07	0.30914	1.60126e-07
0.31158	1.62598e-07	0.31158	1.32324e-07	0.31158	1.61346e-07
0.31403	1.6333e-07	0.31403	1.32904e-07	0.31403	1.62201e-07
0.31647	1.64001e-07	0.31647	1.33423e-07	0.31647	1.63513e-07
0.31891	1.64978e-07	0.31891	1.33972e-07	0.31891	1.64734e-07
0.32135	1.66534e-07	0.32135	1.34613e-07	0.32135	1.65894e-07
0.32379	1.67938e-07	0.32379	1.35376e-07	0.32379	1.66992e-07
0.32623	1.69342e-07	0.32623	1.35895e-07	0.32623	1.68396e-07
0.32867	1.70593e-07	0.32867	1.36719e-07	0.32867	1.69556e-07
0.33112	1.71539e-07	0.33112	1.37543e-07	0.33112	1.70197e-07
0.33356	1.72974e-07	0.33356	1.38123e-07	0.33356	1.71143e-07
0.336	1.74286e-07	0.336	1.38519e-07	0.336	1.71387e-07
0.33844	1.7572e-07	0.33844	1.39008e-07	0.33844	1.72516e-07
0.34088	1.77521e-07	0.34088	1.3974e-07	0.34088	1.73981e-07
0.34332	1.78467e-07	0.34332	1.40289e-07	0.34332	1.74896e-07
0.34576	1.79962e-07	0.34576	1.40289e-07	0.34576	1.75934e-07
0.34821	1.82037e-07	0.34821	1.40778e-07	0.34821	1.7749e-07
0.35065	1.83289e-07	0.35065	1.409e-07	0.35065	1.78436e-07
0.35309	1.8454e-07	0.35309	1.42242e-07	0.35309	1.79474e-07
0.35553	1.85303e-07	0.35553	1.4212e-07	0.35553	1.80756e-07
0.35797	1.8692e-07	0.35797	1.4267e-07	0.35797	1.8219e-07
0.36041	1.87622e-07	0.36041	1.43585e-07	0.36041	1.83319e-07
0.36285	1.88934e-07	0.36285	1.44623e-07	0.36285	1.83899e-07
0.3653	1.89453e-07	0.3653	1.44653e-07	0.3653	1.8396e-07
0.36774	1.90216e-07	0.36774	1.44928e-07	0.36774	1.84662e-07
0.37018	1.90643e-07	0.37018	1.45538e-07	0.37018	1.84998e-07
0.37262	1.91528e-07	0.37262	1.4624e-07	0.37262	1.86279e-07
0.37506	1.92627e-07	0.37506	1.47522e-07	0.37506	1.87439e-07
0.3775	1.93542e-07	0.3775	1.48193e-07	0.3775	1.88904e-07
0.37994	1.94336e-07	0.37994	1.48529e-07	0.37994	1.90491e-07
0.38239	1.9577e-07	0.38239	1.48346e-07	0.38239	1.91437e-07
0.38483	1.96442e-07	0.38483	1.48804e-07	0.38483	1.91803e-07
0.38727	1.97479e-07	0.38727	1.49048e-07	0.38727	1.92169e-07
0.38971	1.98608e-07	0.38971	1.49994e-07	0.38971	1.9342e-07
0.39215	1.99982e-07	0.39215	1.50665e-07	0.39215	1.94305e-07
0.39459	2.01294e-07	0.39459	1.5094e-07	0.39459	1.94885e-07
0.39703	2.02545e-07	0.39703	1.52252e-07	0.39703	1.95557e-07
0.39948	2.03064e-07	0.39948	1.52679e-07	0.39948	1.96869e-07
0.40192	2.04559e-07	0.40192	1.54022e-07	0.40192	1.98334e-07
0.40436	2.05688e-07	0.40436	1.54205e-07	0.40436	1.99066e-07
0.4068	2.06726e-07	0.4068	1.54999e-07	0.4068	2.00775e-07
0.40924	2.06635e-07	0.40924	1.55182e-07	0.40924	2.01691e-07
0.41168	2.07489e-07	0.41168	1.55792e-07	0.41168	2.0224e-07
0.41412	2.07489e-07	0.41412	1.56433e-07	0.41412	2.02728e-07
0.41656	2.07794e-07	0.41656	1.56891e-07	0.41656	2.02698e-07
0.41901	2.08313e-07	0.41901	1.57318e-07	0.41901	2.0401e-07
0.42145	2.08954e-07	0.42145	1.58142e-07	0.42145	2.05688e-07
0.42389	2.0816e-07	0.42389	1.58936e-07	0.42389	2.06573e-07
0.42633	2.09045e-07	0.42633	1.60065e-07	0.42633	2.07153e-07
0.42877	2.09106e-07	0.42877	1.6098e-07	0.42877	2.07794e-07
0.43121	2.09137e-07	0.43121	1.6156e-07	0.43121	2.09259e-07
0.43365	2.10022e-07	0.43365	1.62476e-07	0.43365	2.11609e-07
0.4361	2.10144e-07	0.4361	1.63452e-07	0.4361	2.11884e-07
0.43854	2.10083e-07	0.43854	1.64215e-07	0.43854	2.13379e-07
0.44098	2.09869e-07	0.44098	1.65649e-07	0.44098	2.14294e-07
0.44342	2.10632e-07	0.44342	1.65802e-07	0.44342	2.14294e-07
0.44586	2.10693e-07	0.44586	1.66443e-07	0.44586	2.15912e-07
0.4483	2.10815e-07	0.4483	1.67542e-07	0.4483	2.16614e-07
0.45074	2.11182e-07	0.45074	1.67847e-07	0.45074	2.17346e-07
0.45319	2.1167e-07	0.45319	1.68915e-07	0.45319	2.18964e-07
0.45563	2.12402e-07	0.45563	1.70258e-07	0.45563	2.19086e-07
0.45807	2.12189e-07	0.45807	1.70776e-07	0.45807	2.20306e-07
0.46051	2.13226e-07	0.46051	1.71387e-07	0.46051	2.21924e-07
0.46295	2.13043e-07	0.46295	1.72058e-07	0.46295	2.22534e-07
0.46539	2.13287e-07	0.46539	1.72638e-07	0.46539	2.229e-07
0.46783	2.13898e-07	0.46783	1.73767e-07	0.46783	2.24579e-07
0.47028	2.13867e-07	0.47028	1.74805e-07	0.47028	2.25494e-07
0.47272	2.14294e-07	0.47272	1.76086e-07	0.47272	2.26379e-07
0.47516	2.14355e-07	0.47516	1.76697e-07	0.47516	2.27448e-07
0.4776	2.14752e-07	0.4776	1.77734e-07	0.4776	2.28333e-07
0.48004	2.14661e-07	0.48004	1.78497e-07	0.48004	2.29279e-07
0.48248	2.146e-07	0.48248	1.79199e-07	0.48248	2.29645e-07
0.48492	2.14966e-07	0.48492	1.80145e-07	0.48492	2.31476e-07
0.48737	2.15118e-07	0.48737	1.80939e-07	0.48737	2.32269e-07
0.48981	2.15302e-07	0.48981	1.81671e-07	0.48981	2.33124e-07
0.49225	2.15607e-07	0.49225	1.81793e-07	0.49225	2.34192e-07
0.49469	2.15546e-07	0.49469	1.82465e-07	0.49469	2.35809e-07
0.49713	2.16217e-07	0.49713	1.82861e-07	0.49713	2.37244e-07
0.49957	2.17255e-07	0.49957	1.83929e-07	0.49957	2.38098e-07
0.50201	2.17316e-07	0.50201	1.84174e-07	0.50201	2.39227e-07
0.50446	2.18323e-07	0.50446	1.85181e-07	0.50446	2.40509e-07
0.5069	2.19147e-07	0.5069	1.85944e-07	0.5069	2.41791e-07
0.50934	2.19727e-07	0.50934	1.86768e-07	0.50934	2.4292e-07
0.51178	2.19574e-07	0.51178	1.87836e-07	0.51178	2.43805e-07
0.51422	2.19421e-07	0.51422	1.8866e-07	0.51422	2.44781e-07
0.51666	2.1933e-07	0.51666	1.89362e-07	0.51666	2.46094e-07
0.5191	2.19238e-07	0.5191	1.90521e-07	0.5191	2.4762e-07
0.52155	2.18964e-07	0.52155	1.91071e-07	0.52155	2.48962e-07
0.52399	2.19788e-07	0.52399	1.92627e-07	0.52399	2.49939e-07
0.52643	2.20154e-07	0.52643	1.93024e-07	0.52643	2.51099e-07
0.52887	2.20734e-07	0.52887	1.93726e-07	0.52887	2.52228e-07
0.53131	2.20764e-07	0.53131	1.9458e-07	0.53131	2.53357e-07
0.53375	2.21497e-07	0.53375	1.95496e-07	0.53375	2.54486e-07
0.53619	2.21497e-07	0.53619	1.96198e-07	0.53619	2.55768e-07
0.53864	2.22443e-07	0.53864	1.97296e-07	0.53864	2.55951e-07
0.54108	2.22382e-07	0.54108	1.98242e-07	0.54108	2.57416e-07
0.54352	2.22717e-07	0.54352	1.9873e-07	0.54352	2.59125e-07
0.54596	2.23206e-07	0.54596	2.00684e-07	0.54596	2.59888e-07
0.5484	2.23328e-07	0.5484	2.01202e-07	0.5484	2.61658e-07
0.55084	2.23999e-07	0.55084	2.02057e-07	0.55084	2.63092e-07
0.55328	2.2345e-07	0.55328	2.02942e-07	0.55328	2.63641e-07
0.55573	2.23724e-07	0.55573	2.04407e-07	0.55573	2.65076e-07
0.55817	2.24365e-07	0.55817	2.05688e-07	0.55817	2.66846e-07
0.56061	2.24579e-07	0.56061	2.07184e-07	0.56061	2.68616e-07
0.56305	2.24579e-07	0.56305	2.07397e-07	0.56305	2.70355e-07
0.56549	2.24701e-07	0.56549	2.08282e-07	0.56549	2.71545e-07
0.56793	2.258e-07	0.56793	2.0932e-07	0.56793	2.72949e-07
0.57037	2.26501e-07	0.57037	2.09534e-07	0.57037	2.74292e-07
0.57281	2.27905e-07	0.57281	2.09595e-07	0.57281	2.75787e-07
0.57526	2.28912e-07	0.57526	2.10388e-07	0.57526	2.77313e-07
0.5777	2.29279e-07	0.5777	2.10663e-07	0.5777	2.78687e-07
0.58014	2.29279e-07	0.58014	2.12036e-07	0.58014	2.79236e-07
0.58258	2.29492e-07	0.58258	2.13806e-07	0.58258	2.79907e-07
0.58502	2.29675e-07	0.58502	2.14905e-07	0.58502	2.81342e-07
0.58746	2.30042e-07	0.58746	2.15942e-07	0.58746	2.82471e-07
0.5899	2.30469e-07	0.5899	2.16553e-07	0.5899	2.82928e-07
0.59235	2.30133e-07	0.59235	2.17651e-07	0.59235	2.85431e-07
0.59479	2.30652e-07	0.59479	2.17987e-07	0.59479	2.86316e-07
0.59723	2.30255e-07	0.59723	2.19025e-07	0.59723	2.88635e-07
0.59967	2.31232e-07	0.59967	2.19116e-07	0.59967	2.90039e-07
0.60211	2.32239e-07	0.60211	2.19818e-07	0.60211	2.9129e-07
0.60455	2.33429e-07	0.60455	2.211e-07	0.60455	2.93152e-07
0.60699	2.33978e-07	0.60699	2.23145e-07	0.60699	2.93793e-07
0.60944	2.34711e-07	0.60944	2.23022e-07	0.60944	2.95929e-07
0.61188	2.36572e-07	0.61188	2.22961e-07	0.61188	2.97028e-07
0.61432	2.36877e-07	0.61432	2.2348e-07	0.61432	2.97577e-07
0.61676	2.38495e-07	0.61676	2.25403e-07	0.61676	2.98096e-07
0.6192	2.38739e-07	0.6192	2.2583e-07	0.6192	2.98615e-07
0.62164	2.38953e-07	0.62164	2.26746e-07	0.62164	2.99805e-07
0.62408	2.39563e-07	0.62408	2.27234e-07	0.62408	2.99805e-07
0.62653	2.41302e-07	0.62653	2.28088e-07	0.62653	3.01117e-07
0.62897	2.42676e-07	0.62897	2.29126e-07	0.62897	3.02338e-07
0.63141	2.44324e-07	0.63141	2.30621e-07	0.63141	3.03467e-07
0.63385	2.45972e-07	0.63385	2.31628e-07	0.63385	3.0481e-07
0.63629	2.45514e-07	0.63629	2.323e-07	0.63629	3.06885e-07
0.63873	2.45148e-07	0.63873	2.34192e-07	0.63873	3.07098e-07
0.64117	2.45605e-07	0.64117	2.34985e-07	0.64117	3.08899e-07
0.64362	2.45789e-07	0.64362	2.35077e-07	0.64362	3.10089e-07
0.64606	2.47101e-07	0.64606	2.36755e-07	0.64606	3.12103e-07
0.6485	2.48291e-07	0.6485	2.37946e-07	0.6485	3.12805e-07
0.65094	2.49176e-07	0.65094	2.39319e-07	0.65094	3.12744e-07
0.65338	2.49756e-07	0.65338	2.41699e-07	0.65338	3.14575e-07
0.65582	2.50458e-07	0.65582	2.43195e-07	0.65582	3.15643e-07
0.65826	2.52808e-07	0.65826	2.44324e-07	0.65826	3.18542e-07
0.66071	2.55371e-07	0.66071	2.45544e-07	0.66071	3.20435e-07
0.66315	2.57111e-07	0.66315	2.45239e-07	0.66315	3.21747e-07
0.66559	2.59064e-07	0.66559	2.46674e-07	0.66559	3.22754e-07
0.66803	2.60406e-07	0.66803	2.46948e-07	0.66803	3.23364e-07
0.67047	2.61261e-07	0.67047	2.47528e-07	0.67047	3.25989e-07
0.67291	2.6239e-07	0.67291	2.4823e-07	0.67291	3.27759e-07
0.67535	2.63e-07	0.67535	2.5058e-07	0.67535	3.29193e-07
0.6778	2.63184e-07	0.6778	2.51801e-07	0.6778	3.30536e-07
0.68024	2.63916e-07	0.68024	2.52502e-07	0.68024	3.32153e-07
0.68268	2.65015e-07	0.68268	2.52991e-07	0.68268	3.34076e-07
0.68512	2.65472e-07	0.68512	2.54791e-07	0.68512	3.35541e-07
0.68756	2.67029e-07	0.68756	2.55219e-07	0.68756	3.36517e-07
0.69	2.68616e-07	0.69	2.55524e-07	0.69	3.37463e-07
0.69244	2.68951e-07	0.69244	2.56836e-07	0.69244	3.38165e-07
0.69489	2.70111e-07	0.69489	2.58179e-07	0.69489	3.39691e-07
0.69733	2.71454e-07	0.69733	2.58972e-07	0.69733	3.4198e-07
0.69977	2.72156e-07	0.69977	2.6004e-07	0.69977	3.43506e-07
0.70221	2.72095e-07	0.70221	2.61414e-07	0.70221	3.43384e-07
0.70465	2.72705e-07	0.70465	2.63e-07	0.70465	3.45398e-07
0.70709	2.724e-07	0.70709	2.63733e-07	0.70709	3.47931e-07
0.70953	2.73407e-07	0.70953	2.65167e-07	0.70953	3.49274e-07
0.71198	2.73895e-07	0.71198	2.66052e-07	0.71198	3.50952e-07
0.71442	2.75696e-07	0.71442	2.67456e-07	0.71442	3.50861e-07
0.71686	2.76245e-07	0.71686	2.68372e-07	0.71686	3.53363e-07
0.7193	2.76825e-07	0.7193	2.70142e-07	0.7193	3.53729e-07
0.72174	2.76794e-07	0.72174	2.70569e-07	0.72174	3.55988e-07
0.72418	2.78168e-07	0.72418	2.72217e-07	0.72418	3.57574e-07
0.72662	2.78717e-07	0.72662	2.7301e-07	0.72662	3.58459e-07
0.72906	2.8006e-07	0.72906	2.74506e-07	0.72906	3.59894e-07
0.73151	2.82135e-07	0.73151	2.74994e-07	0.73151	3.6145e-07
0.73395	2.8421e-07	0.73395	2.76428e-07	0.73395	3.63342e-07
0.73639	2.86163e-07	0.73639	2.77588e-07	0.73639	3.64197e-07
0.73883	2.87659e-07	0.73883	2.78717e-07	0.73883	3.65814e-07
0.74127	2.88879e-07	0.74127	2.8006e-07	0.74127	3.66943e-07
0.74371	2.89429e-07	0.74371	2.81769e-07	0.74371	3.6792e-07
0.74615	2.89886e-07	0.74615	2.83173e-07	0.74615	3.68774e-07
0.7486	2.90955e-07	0.7486	2.8418e-07	0.7486	3.685e-07
0.75104	2.93213e-07	0.75104	2.85828e-07	0.75104	3.68866e-07
0.75348	2.94769e-07	0.75348	2.8717e-07	0.75348	3.71918e-07
0.75592	2.95807e-07	0.75592	2.88116e-07	0.75592	3.71368e-07
0.75836	2.96265e-07	0.75836	2.89825e-07	0.75836	3.72742e-07
0.7608	2.97455e-07	0.7608	2.92358e-07	0.7608	3.72162e-07
0.76324	2.9953e-07	0.76324	2.94708e-07	0.76324	3.73962e-07
0.76569	3.01392e-07	0.76569	2.95593e-07	0.76569	3.74756e-07
0.76813	3.02948e-07	0.76813	2.96631e-07	0.76813	3.75e-07
0.77057	3.03558e-07	0.77057	2.97638e-07	0.77057	3.75977e-07
0.77301	3.04199e-07	0.77301	2.98798e-07	0.77301	3.77869e-07
0.77545	3.05756e-07	0.77545	3.00568e-07	0.77545	3.80005e-07
0.77789	3.08105e-07	0.77789	3.02002e-07	0.77789	3.80768e-07
0.78033	3.08594e-07	0.78033	3.03192e-07	0.78033	3.8208e-07
0.78278	3.09082e-07	0.78278	3.0481e-07	0.78278	3.83087e-07
0.78522	3.09814e-07	0.78522	3.06213e-07	0.78522	3.84918e-07
0.78766	3.11646e-07	0.78766	3.08228e-07	0.78766	3.84766e-07
0.7901	3.13202e-07	0.7901	3.09967e-07	0.7901	3.87909e-07
0.79254	3.15643e-07	0.79254	3.1131e-07	0.79254	3.90167e-07
0.79498	3.16437e-07	0.79498	3.12836e-07	0.79498	3.91937e-07
0.79742	3.18665e-07	0.79742	3.14209e-07	0.79742	3.93158e-07
0.79987	3.20404e-07	0.79987	3.15399e-07	0.79987	3.94104e-07
0.80231	3.22784e-07	0.80231	3.16864e-07	0.80231	3.94562e-07
0.80475	3.23395e-07	0.80475	3.18207e-07	0.80475	3.95142e-07
0.80719	3.23151e-07	0.80719	3.2074e-07	0.80719	3.97125e-07
0.80963	3.24036e-07	0.80963	3.237e-07	0.80963	3.99841e-07
0.81207	3.24951e-07	0.81207	3.25043e-07	0.81207	4.02771e-07
0.81451	3.26385e-07	0.81451	3.26294e-07	0.81451	4.06036e-07
0.81696	3.26447e-07	0.81696	3.2843e-07	0.81696	4.08295e-07
0.8194	3.28003e-07	0.8194	3.30963e-07	0.8194	4.0918e-07
0.82184	3.30139e-07	0.82184	3.33191e-07	0.82184	4.11926e-07
0.82428	3.32916e-07	0.82428	3.34106e-07	0.82428	4.14581e-07
0.82672	3.35419e-07	0.82672	3.35999e-07	0.82672	4.1452e-07
0.82916	3.38135e-07	0.82916	3.38654e-07	0.82916	4.16504e-07
0.8316	3.40271e-07	0.8316	3.40759e-07	0.8316	4.18884e-07
0.83405	3.41644e-07	0.83405	3.42621e-07	0.83405	4.20502e-07
0.83649	3.44055e-07	0.83649	3.43994e-07	0.83649	4.22089e-07
0.83893	3.45581e-07	0.83893	3.46497e-07	0.83893	4.24713e-07
0.84137	3.45917e-07	0.84137	3.48755e-07	0.84137	4.26331e-07
0.84381	3.44849e-07	0.84381	3.51288e-07	0.84381	4.26514e-07
0.84625	3.44604e-07	0.84625	3.54004e-07	0.84625	4.28101e-07
0.84869	3.44666e-07	0.84869	3.55652e-07	0.84869	4.30115e-07
0.85114	3.46527e-07	0.85114	3.573e-07	0.85114	4.32648e-07
0.85358	3.4845e-07	0.85358	3.58856e-07	0.85358	4.34387e-07
0.85602	3.4964e-07	0.85602	3.61969e-07	0.85602	4.36035e-07
0.85846	3.50708e-07	0.85846	3.64685e-07	0.85846	4.3808e-07
0.8609	3.52417e-07	0.8609	3.67462e-07	0.8609	4.40308e-07
0.86334	3.53516e-07	0.86334	3.69843e-07	0.86334	4.41315e-07
0.86578	3.55194e-07	0.86578	3.7207e-07	0.86578	4.4223e-07
0.86823	3.55865e-07	0.86823	3.76221e-07	0.86823	4.43817e-07
0.87067	3.56659e-07	0.87067	3.78296e-07	0.87067	4.47144e-07
0.87311	3.5788e-07	0.87311	3.80829e-07	0.87311	4.48273e-07
0.87555	3.60107e-07	0.87555	3.8327e-07	0.87555	4.48151e-07
0.87799	3.63342e-07	0.87799	3.85742e-07	0.87799	4.51538e-07
0.88043	3.66669e-07	0.88043	3.8855e-07	0.88043	4.54865e-07
0.88287	3.69354e-07	0.88287	3.91327e-07	0.88287	4.56451e-07
0.88531	3.72528e-07	0.88531	3.94348e-07	0.88531	4.57336e-07
0.88776	3.75732e-07	0.88776	3.95935e-07	0.88776	4.59503e-07
0.8902	3.79059e-07	0.8902	3.99323e-07	0.8902	4.61151e-07
0.89264	3.80981e-07	0.89264	4.00818e-07	0.89264	4.63318e-07
0.89508	3.8269e-07	0.89508	4.02954e-07	0.89508	4.65088e-07
0.89752	3.83667e-07	0.89752	4.04877e-07	0.89752	4.65973e-07
0.89996	3.84308e-07	0.89996	4.07928e-07	0.89996	4.68658e-07
0.9024	3.85132e-07	0.9024	4.11957e-07	0.9024	4.71375e-07
0.90485	3.88885e-07	0.90485	4.15497e-07	0.90485	4.74579e-07
0.90729	3.91052e-07	0.90729	4.17328e-07	0.90729	4.76837e-07
0.90973	3.92761e-07	0.90973	4.20166e-07	0.90973	4.77966e-07
0.91217	3.94623e-07	0.91217	4.22485e-07	0.91217	4.82086e-07
0.91461	3.96332e-07	0.91461	4.24866e-07	0.91461	4.84802e-07
0.91705	3.98376e-07	0.91705	4.28345e-07	0.91705	4.87335e-07
0.91949	4.01489e-07	0.91949	4.31305e-07	0.91949	4.90204e-07
0.92194	4.02771e-07	0.92194	4.3457e-07	0.92194	4.93469e-07
0.92438	4.02649e-07	0.92438	4.3631e-07	0.92438	4.95148e-07
0.92682	4.0506e-07	0.92682	4.39117e-07	0.92682	4.9826e-07
0.92926	4.09454e-07	0.92926	4.42169e-07	0.92926	5.01678e-07
0.9317	4.12811e-07	0.9317	4.46045e-07	0.9317	5.03906e-07
0.93414	4.16931e-07	0.93414	4.47998e-07	0.93414	5.0705e-07
0.93658	4.19342e-07	0.93658	4.51263e-07	0.93658	5.10498e-07
0.93903	4.23187e-07	0.93903	4.54254e-07	0.93903	5.12634e-07
0.94147	4.25415e-07	0.94147	4.56482e-07	0.94147	5.14984e-07
0.94391	4.26758e-07	0.94391	4.60175e-07	0.94391	5.18402e-07
0.94635	4.27368e-07	0.94635	4.63226e-07	0.94635	5.20538e-07
0.94879	4.29901e-07	0.94879	4.67896e-07	0.94879	5.23865e-07
0.95123	4.32434e-07	0.95123	4.70642e-07	0.95123	5.25879e-07
0.95367	4.35486e-07	0.95367	4.75067e-07	0.95367	5.28961e-07
0.95612	4.37897e-07	0.95612	4.77203e-07	0.95612	5.3302e-07
0.95856	4.40186e-07	0.95856	4.80988e-07	0.95856	5.35736e-07
0.961	4.41162e-07	0.961	4.84131e-07	0.961	5.37262e-07
0.96344	4.4397e-07	0.96344	4.87946e-07	0.96344	5.40588e-07
0.96588	4.46777e-07	0.96588	4.9173e-07	0.96588	5.43152e-07
0.96832	4.5047e-07	0.96832	4.95483e-07	0.96832	5.46204e-07
0.97076	4.52728e-07	0.97076	4.97101e-07	0.97076	5.49927e-07
0.97321	4.54285e-07	0.97321	5.01465e-07	0.97321	5.52216e-07
0.97565	4.56879e-07	0.97565	5.04211e-07	0.97565	5.5484e-07
0.97809	4.58618e-07	0.97809	5.07507e-07	0.97809	5.58777e-07
0.98053	4.59198e-07	0.98053	5.10284e-07	0.98053	5.62378e-07
0.98297	4.60693e-07	0.98297	5.13367e-07	0.98297	5.67352e-07
0.98541	4.62463e-07	0.98541	5.18188e-07	0.98541	5.68542e-07
0.98785	4.65607e-07	0.98785	5.22156e-07	0.98785	5.72784e-07
0.9903	4.69025e-07	0.9903	5.25299e-07	0.9903	5.755e-07
0.99274	4.73236e-07	0.99274	5.29388e-07	0.99274	5.79559e-07
0.99518	4.76624e-07	0.99518	5.32318e-07	0.99518	5.81848e-07
0.99762	4.79584e-07	0.99762	5.36896e-07	0.99762	5.8728e-07
1.00006	4.82574e-07	1.00006	5.40283e-07	1.00006	5.9079e-07
1.0025	4.86115e-07	1.0025	5.4364e-07	1.0025	5.93384e-07
1.00494	4.90265e-07	1.00494	5.47546e-07	1.00494	5.95123e-07
1.00739	4.94659e-07	1.00739	5.51208e-07	1.00739	6.0025e-07
1.00983	4.96887e-07	1.00983	5.54901e-07	1.00983	6.01196e-07
1.01227	4.98444e-07	1.01227	5.6015e-07	1.01227	6.04248e-07
1.01471	5.01282e-07	1.01471	5.63263e-07	1.01471	6.073e-07
1.01715	5.05127e-07	1.01715	5.65796e-07	1.01715	6.11877e-07
1.01959	5.08698e-07	1.01959	5.69244e-07	1.01959	6.14319e-07
1.02203	5.12024e-07	1.02203	5.72632e-07	1.02203	6.17676e-07
1.02448	5.14862e-07	1.02448	5.75745e-07	1.02448	6.20117e-07
1.02692	5.18463e-07	1.02692	5.80414e-07	1.02692	6.26221e-07
1.02936	5.21057e-07	1.02936	5.83649e-07	1.02936	6.28662e-07
1.0318	5.24902e-07	1.0318	5.87646e-07	1.0318	6.33545e-07
1.03424	5.27679e-07	1.03424	5.91888e-07	1.03424	6.37817e-07
1.03668	5.30609e-07	1.03668	5.95947e-07	1.03668	6.41479e-07
1.03912	5.35034e-07	1.03912	6.00464e-07	1.03912	6.43616e-07
1.04156	5.39337e-07	1.04156	6.03027e-07	1.04156	6.50024e-07
1.04401	5.44464e-07	1.04401	6.06689e-07	1.04401	6.53076e-07
1.04645	5.47943e-07	1.04645	6.11267e-07	1.04645	6.56738e-07
1.04889	5.51788e-07	1.04889	6.1615e-07	1.04889	6.60706e-07
1.05133	5.55786e-07	1.05133	6.21338e-07	1.05133	6.64673e-07
1.05377	5.59509e-07	1.05377	6.26221e-07	1.05377	6.6803e-07
1.05621	5.63995e-07	1.05621	6.30188e-07	1.05621	6.71692e-07
1.05865	5.67749e-07	1.05865	6.35376e-07	1.05865	6.75354e-07
1.0611	5.70618e-07	1.0611	6.39648e-07	1.0611	6.80542e-07
1.06354	5.72876e-07	1.06354	6.43921e-07	1.06354	6.86646e-07
1.06598	5.75562e-07	1.06598	6.51245e-07	1.06598	6.91528e-07
1.06842	5.78613e-07	1.06842	6.54297e-07	1.06842	6.95801e-07
1.07086	5.83618e-07	1.07086	6.58569e-07	1.07086	7.01599e-07
1.0733	5.86914e-07	1.0733	6.62842e-07	1.0733	7.06177e-07
1.07574	5.90332e-07	1.07574	6.6803e-07	1.07574	7.10449e-07
1.07819	5.94513e-07	1.07819	6.72913e-07	1.07819	7.13501e-07
1.08063	5.9845e-07	1.08063	6.79321e-07	1.08063	7.21741e-07
1.08307	6.01318e-07	1.08307	6.84509e-07	1.08307	7.27234e-07
1.08551	6.04858e-07	1.08551	6.89697e-07	1.08551	7.30896e-07
1.08795	6.073e-07	1.08795	6.94275e-07	1.08795	7.35168e-07
1.09039	6.10352e-07	1.09039	7.00073e-07	1.09039	7.39746e-07
1.09283	6.14319e-07	1.09283	7.06482e-07	1.09283	7.44019e-07
1.09528	6.18896e-07	1.09528	7.13196e-07	1.09528	7.47986e-07
1.09772	6.24695e-07	1.09772	7.19604e-07	1.09772	7.52258e-07
1.10016	6.30188e-07	1.10016	7.26624e-07	1.10016	7.56836e-07
1.1026	6.3385e-07	1.1026	7.33948e-07	1.1026	7.62329e-07
1.10504	6.37207e-07	1.10504	7.40356e-07	1.10504	7.69958e-07
1.10748	6.39648e-07	1.10748	7.46765e-07	1.10748	7.76367e-07
1.10992	6.43616e-07	1.10992	7.53784e-07	1.10992	7.83691e-07
1.11237	6.46057e-07	1.11237	7.60498e-07	1.11237	7.88574e-07
1.11481	6.51245e-07	1.11481	7.68127e-07	1.11481	7.93152e-07
1.11725	6.54907e-07	1.11725	7.75757e-07	1.11725	7.9895e-07
1.11969	6.58569e-07	1.11969	7.82471e-07	1.11969	8.05969e-07
1.12213	6.61621e-07	1.12213	7.91016e-07	1.12213	8.13293e-07
1.12457	6.66504e-07	1.12457	7.96509e-07	1.12457	8.20618e-07
1.12701	6.70471e-07	1.12701	8.04749e-07	1.12701	8.27942e-07
1.12946	6.77185e-07	1.12946	8.12378e-07	1.12946	8.36792e-07
1.1319	6.83289e-07	1.1319	8.20313e-07	1.1319	8.42896e-07
1.13434	6.87256e-07	1.13434	8.30078e-07	1.13434	8.49915e-07
1.13678	6.90308e-07	1.13678	8.39844e-07	1.13678	8.57544e-07
1.13922	6.92749e-07	1.13922	8.48083e-07	1.13922	8.65784e-07
1.14166	6.97632e-07	1.14166	8.56018e-07	1.14166	8.73718e-07
1.1441	7.0282e-07	1.1441	8.65784e-07	1.1441	8.81958e-07
1.14655	7.09839e-07	1.14655	8.73108e-07	1.14655	8.88672e-07
1.14899	7.13806e-07	1.14899	8.80737e-07	1.14899	8.97217e-07
1.15143	7.18994e-07	1.15143	8.89587e-07	1.15143	9.04236e-07
1.15387	7.23572e-07	1.15387	8.99048e-07	1.15387	9.12476e-07
1.15631	7.28455e-07	1.15631	9.08203e-07	1.15631	9.21326e-07
1.15875	7.34863e-07	1.15875	9.18274e-07	1.15875	9.30786e-07
1.16119	7.40356e-07	1.16119	9.28345e-07	1.16119	9.39636e-07
1.16364	7.44324e-07	1.16364	9.375e-07	1.16364	9.47571e-07
1.16608	7.50122e-07	1.16608	9.48792e-07	1.16608	9.53979e-07
1.16852	7.5592e-07	1.16852	9.59473e-07	1.16852	9.63135e-07
1.17096	7.59888e-07	1.17096	9.70764e-07	1.17096	9.69543e-07
1.1734	7.61414e-07	1.1734	9.81445e-07	1.1734	9.79919e-07
1.17584	7.65686e-07	1.17584	9.90601e-07	1.17584	9.88159e-07
1.17828	7.70264e-07	1.17828	1.00159e-06	1.17828	9.9762e-07
1.18073	7.76978e-07	1.18073	1.01135e-06	1.18073	1.00861e-06
1.18317	7.83997e-07	1.18317	1.02142e-06	1.18317	1.01929e-06
1.18561	7.89185e-07	1.18561	1.0321e-06	1.18561	1.02844e-06
1.18805	7.93457e-07	1.18805	1.0437e-06	1.18805	1.03638e-06
1.19049	7.96509e-07	1.19049	1.0553e-06	1.19049	1.04553e-06
1.19293	8.01697e-07	1.19293	1.06659e-06	1.19293	1.05469e-06
1.19537	8.06885e-07	1.19537	1.07788e-06	1.19537	1.06384e-06
1.19781	8.12073e-07	1.19781	1.09039e-06	1.19781	1.07239e-06
1.20026	8.17261e-07	1.20026	1.10321e-06	1.20026	1.08246e-06
1.2027	8.22144e-07	1.2027	1.11481e-06	1.2027	1.09467e-06
1.20514	8.26721e-07	1.20514	1.12518e-06	1.20514	1.10321e-06
1.20758	8.32214e-07	1.20758	1.138e-06	1.20758	1.11389e-06
1.21002	8.38318e-07	1.21002	1.14929e-06	1.21002	1.12244e-06
1.21246	8.4259e-07	1.21246	1.16333e-06	1.21246	1.13373e-06
1.2149	8.48999e-07	1.2149	1.17523e-06	1.2149	1.1441e-06
1.21735	8.55408e-07	1.21735	1.18835e-06	1.21735	1.15479e-06
1.21979	8.61816e-07	1.21979	1.20331e-06	1.21979	1.16486e-06
1.22223	8.67615e-07	1.22223	1.21796e-06	1.22223	1.17676e-06
1.22467	8.72192e-07	1.22467	1.23047e-06	1.22467	1.18561e-06
1.22711	8.77991e-07	1.22711	1.24481e-06	1.22711	1.1969e-06
1.22955	8.80737e-07	1.22955	1.25885e-06	1.22955	1.20728e-06
1.23199	8.87451e-07	1.23199	1.2738e-06	1.23199	1.21948e-06
1.23444	8.9386e-07	1.23444	1.28906e-06	1.23444	1.22986e-06
1.23688	8.99048e-07	1.23688	1.3028e-06	1.23688	1.24207e-06
1.23932	9.05151e-07	1.23932	1.31683e-06	1.23932	1.25122e-06
1.24176	9.11255e-07	1.24176	1.33209e-06	1.24176	1.26343e-06
1.2442	9.16443e-07	1.2442	1.34552e-06	1.2442	1.27441e-06
1.24664	9.22852e-07	1.24664	1.36017e-06	1.24664	1.2854e-06
1.24908	9.27124e-07	1.24908	1.37512e-06	1.24908	1.29639e-06
1.25153	9.31702e-07	1.25153	1.38855e-06	1.25153	1.30829e-06
1.25397	9.38416e-07	1.25397	1.40198e-06	1.25397	1.31866e-06
1.25641	9.43298e-07	1.25641	1.4151e-06	1.25641	1.33087e-06
1.25885	9.49402e-07	1.25885	1.42944e-06	1.25885	1.34125e-06
1.26129	9.56421e-07	1.26129	1.44348e-06	1.26129	1.35101e-06
1.26373	9.61609e-07	1.26373	1.4566e-06	1.26373	1.36566e-06
1.26617	9.67102e-07	1.26617	1.47217e-06	1.26617	1.37634e-06
1.26862	9.7229e-07	1.26862	1.48499e-06	1.26862	1.38702e-06
1.27106	9.77173e-07	1.27106	1.50055e-06	1.27106	1.39862e-06
1.2735	9.81445e-07	1.2735	1.51306e-06	1.2735	1.40869e-06
1.27594	9.88159e-07	1.27594	1.5274e-06	1.27594	1.42242e-06
1.27838	9.94263e-07	1.27838	1.54449e-06	1.27838	1.43677e-06
1.28082	9.99756e-07	1.28082	1.56067e-06	1.28082	1.44928e-06
1.28326	1.00555e-06	1.28326	1.57379e-06	1.28326	1.46118e-06
1.28571	1.0141e-06	1.28571	1.59241e-06	1.28571	1.47156e-06
1.28815	1.01898e-06	1.28815	1.60767e-06	1.28815	1.48407e-06
1.29059	1.02478e-06	1.29059	1.62354e-06	1.29059	1.49536e-06
1.29303	1.02875e-06	1.29303	1.6394e-06	1.29303	1.50787e-06
1.29547	1.03302e-06	1.29547	1.65405e-06	1.29547	1.51978e-06
1.29791	1.03821e-06	1.29791	1.67084e-06	1.29791	1.53076e-06
1.30035	1.0434e-06	1.30035	1.68671e-06	1.30035	1.54266e-06
1.3028	1.04767e-06	1.3028	1.70135e-06	1.3028	1.5567e-06
1.30524	1.05347e-06	1.30524	1.71844e-06	1.30524	1.57135e-06
1.30768	1.05865e-06	1.30768	1.73309e-06	1.30768	1.58173e-06
1.31012	1.06628e-06	1.31012	1.75049e-06	1.31012	1.59485e-06
1.31256	1.07178e-06	1.31256	1.76483e-06	1.31256	1.60583e-06
1.315	1.0791e-06	1.315	1.78162e-06	1.315	1.61957e-06
1.31744	1.08612e-06	1.31744	1.79871e-06	1.31744	1.62994e-06
1.31989	1.09161e-06	1.31989	1.81488e-06	1.31989	1.64398e-06
1.32233	1.0968e-06	1.32233	1.83044e-06	1.32233	1.65527e-06
1.32477	1.1026e-06	1.32477	1.84723e-06	1.32477	1.66748e-06
1.32721	1.1087e-06	1.32721	1.86005e-06	1.32721	1.67664e-06
1.32965	1.1145e-06	1.32965	1.87469e-06	1.32965	1.69067e-06
1.33209	1.11969e-06	1.33209	1.88751e-06	1.33209	1.70166e-06
1.33453	1.12671e-06	1.33453	1.90399e-06	1.33453	1.716e-06
1.33698	1.13403e-06	1.33698	1.92139e-06	1.33698	1.72699e-06
1.33942	1.14075e-06	1.33942	1.94031e-06	1.33942	1.74133e-06
1.34186	1.14685e-06	1.34186	1.95587e-06	1.34186	1.75323e-06
1.3443	1.15204e-06	1.3443	1.97083e-06	1.3443	1.76697e-06
1.34674	1.15814e-06	1.34674	1.98853e-06	1.34674	1.77917e-06
1.34918	1.16577e-06	1.34918	2.00439e-06	1.34918	1.79291e-06
1.35162	1.17279e-06	1.35162	2.02148e-06	1.35162	1.80542e-06
1.35406	1.18011e-06	1.35406	2.04041e-06	1.35406	1.82129e-06
1.35651	1.18713e-06	1.35651	2.05933e-06	1.35651	1.83197e-06
1.35895	1.19507e-06	1.35895	2.07672e-06	1.35895	1.84692e-06
1.36139	1.20056e-06	1.36139	2.09076e-06	1.36139	1.86035e-06
1.36383	1.2085e-06	1.36383	2.10754e-06	1.36383	1.87439e-06
1.36627	1.21521e-06	1.36627	2.12616e-06	1.36627	1.8869e-06
1.36871	1.22192e-06	1.36871	2.14539e-06	1.36871	1.90186e-06
1.37115	1.22925e-06	1.37115	2.16156e-06	1.37115	1.91315e-06
1.3736	1.23627e-06	1.3736	2.17804e-06	1.3736	1.92902e-06
1.37604	1.24298e-06	1.37604	2.1933e-06	1.37604	1.94366e-06
1.37848	1.25e-06	1.37848	2.21191e-06	1.37848	1.95618e-06
1.38092	1.25671e-06	1.38092	2.23053e-06	1.38092	1.96899e-06
1.38336	1.26556e-06	1.38336	2.25098e-06	1.38336	1.98425e-06
1.3858	1.27197e-06	1.3858	2.26868e-06	1.3858	1.9986e-06
1.38824	1.28021e-06	1.38824	2.29034e-06	1.38824	2.01569e-06
1.39069	1.28876e-06	1.39069	2.30835e-06	1.39069	2.02667e-06
1.39313	1.29669e-06	1.39313	2.33063e-06	1.39313	2.04712e-06
1.39557	1.30524e-06	1.39557	2.34985e-06	1.39557	2.06177e-06
1.39801	1.31348e-06	1.39801	2.37091e-06	1.39801	2.07825e-06
1.40045	1.3208e-06	1.40045	2.38983e-06	1.40045	2.09137e-06
1.40289	1.32782e-06	1.40289	2.4115e-06	1.40289	2.10052e-06
1.40533	1.33484e-06	1.40533	2.43103e-06	1.40533	2.11731e-06
1.40778	1.34247e-06	1.40778	2.45148e-06	1.40778	2.13257e-06
1.41022	1.34918e-06	1.41022	2.47101e-06	1.41022	2.14905e-06
1.41266	1.35498e-06	1.41266	2.49176e-06	1.41266	2.1637e-06
1.4151	1.36353e-06	1.4151	2.51282e-06	1.4151	2.1817e-06
1.41754	1.37115e-06	1.41754	2.53448e-06	1.41754	2.19604e-06
1.41998	1.38031e-06	1.41998	2.55859e-06	1.41998	2.211e-06
1.42242	1.38977e-06	1.42242	2.5824e-06	1.42242	2.22992e-06
1.42487	1.39648e-06	1.42487	2.6059e-06	1.42487	2.24335e-06
1.42731	1.40625e-06	1.42731	2.62787e-06	1.42731	2.26013e-06
1.42975	1.41174e-06	1.42975	2.64954e-06	1.42975	2.27875e-06
1.43219	1.41968e-06	1.43219	2.6712e-06	1.43219	2.2995e-06
1.43463	1.42731e-06	1.43463	2.69501e-06	1.43463	2.31812e-06
1.43707	1.43616e-06	1.43707	2.7182e-06	1.43707	2.33643e-06
1.43951	1.44409e-06	1.43951	2.7475e-06	1.43951	2.35077e-06
1.44196	1.45233e-06	1.44196	2.77893e-06	1.44196	2.36847e-06
1.4444	1.45996e-06	1.4444	2.81281e-06	1.4444	2.38556e-06
1.44684	1.46973e-06	1.44684	2.83325e-06	1.44684	2.40875e-06
1.44928	1.4798e-06	1.44928	2.85614e-06	1.44928	2.42798e-06
1.45172	1.48834e-06	1.45172	2.88361e-06	1.45172	2.44568e-06
1.45416	1.49811e-06	1.45416	2.91107e-06	1.45416	2.46765e-06
1.4566	1.50696e-06	1.4566	2.94098e-06	1.4566	2.48779e-06
1.45905	1.51459e-06	1.45905	2.96692e-06	1.45905	2.50671e-06
1.46149	1.52222e-06	1.46149	2.99713e-06	1.46149	2.52777e-06
1.46393	1.52924e-06	1.46393	3.02338e-06	1.46393	2.547e-06
1.46637	1.53778e-06	1.46637	3.05359e-06	1.46637	2.5705e-06
1.46881	1.54602e-06	1.46881	3.08197e-06	1.46881	2.58636e-06
1.47125	1.55457e-06	1.47125	3.11218e-06	1.47125	2.60498e-06
1.47369	1.56464e-06	1.47369	3.14636e-06	1.47369	2.62268e-06
1.47614	1.57379e-06	1.47614	3.1781e-06	1.47614	2.64709e-06
1.47858	1.58234e-06	1.47858	3.20984e-06	1.47858	2.66937e-06
1.48102	1.59424e-06	1.48102	3.24371e-06	1.48102	2.69165e-06
1.48346	1.60339e-06	1.48346	3.2785e-06	1.48346	2.71027e-06
1.4859	1.61346e-06	1.4859	3.31177e-06	1.4859	2.73346e-06
1.48834	1.62415e-06	1.48834	3.34534e-06	1.48834	2.75513e-06
1.49078	1.63269e-06	1.49078	3.38257e-06	1.49078	2.77771e-06
1.49323	1.64154e-06	1.49323	3.41888e-06	1.49323	2.79877e-06
1.49567	1.6507e-06	1.49567	3.45703e-06	1.49567	2.82562e-06
1.49811	1.65833e-06	1.49811	3.4903e-06	1.49811	2.84851e-06
1.50055	1.67053e-06	1.50055	3.52631e-06	1.50055	2.87201e-06
