# Supplementary material for: In-depth chiral sensing capability of C-dots in a biomimetic protein-based hydrogel: a probe for chiral recognition applications
Source: Royal Society of Chemistry journal article supplement (doi:10.1039/d5bm01508a), 2026-01-01
Supplement: d5bm01508a1.zip [file Figure S11.xlsx]

## Sheet: Figure S11 (a)
-1.4975	-2.4469e-05	-1.4975	-3.11951e-05	-1.4975	-3.54553e-05	-1.4975	-3.69476e-05	-1.4975	-5.44128e-05
-1.49506	-2.06238e-05	-1.49506	-2.6001e-05	-1.49506	-2.95166e-05	-1.49506	-3.07983e-05	-1.49506	-4.48517e-05
-1.49261	-1.83105e-05	-1.49261	-2.29187e-05	-1.49261	-2.59949e-05	-1.49261	-2.71667e-05	-1.49261	-3.92242e-05
-1.49017	-1.67114e-05	-1.49017	-2.08069e-05	-1.49017	-2.35992e-05	-1.49017	-2.47009e-05	-1.49017	-3.54095e-05
-1.48773	-1.55029e-05	-1.48773	-1.92291e-05	-1.48773	-2.18109e-05	-1.48773	-2.28638e-05	-1.48773	-3.25928e-05
-1.48529	-1.45538e-05	-1.48529	-1.79901e-05	-1.48529	-2.04102e-05	-1.48529	-2.14294e-05	-1.48529	-3.03925e-05
-1.48285	-1.37726e-05	-1.48285	-1.69769e-05	-1.48285	-1.92657e-05	-1.48285	-2.02576e-05	-1.48285	-2.86041e-05
-1.48041	-1.31104e-05	-1.48041	-1.61285e-05	-1.48041	-1.83044e-05	-1.48041	-1.92749e-05	-1.48041	-2.71088e-05
-1.47797	-1.25397e-05	-1.47797	-1.53961e-05	-1.47797	-1.74805e-05	-1.47797	-1.84326e-05	-1.47797	-2.58301e-05
-1.47552	-1.20392e-05	-1.47552	-1.47583e-05	-1.47552	-1.67603e-05	-1.47552	-1.76971e-05	-1.47552	-2.47223e-05
-1.47308	-1.15936e-05	-1.47308	-1.41907e-05	-1.47308	-1.61224e-05	-1.47308	-1.70441e-05	-1.47308	-2.37427e-05
-1.47064	-1.11938e-05	-1.47064	-1.36902e-05	-1.47064	-1.55579e-05	-1.47064	-1.64642e-05	-1.47064	-2.28729e-05
-1.4682	-1.08276e-05	-1.4682	-1.32294e-05	-1.4682	-1.50421e-05	-1.4682	-1.59363e-05	-1.4682	-2.20917e-05
-1.46576	-1.0495e-05	-1.46576	-1.28174e-05	-1.46576	-1.45782e-05	-1.46576	-1.54572e-05	-1.46576	-2.13867e-05
-1.46332	-1.01868e-05	-1.46332	-1.24329e-05	-1.46332	-1.41479e-05	-1.46332	-1.50146e-05	-1.46332	-2.07428e-05
-1.46088	-9.90601e-06	-1.46088	-1.2085e-05	-1.46088	-1.37543e-05	-1.46088	-1.46088e-05	-1.46088	-2.01538e-05
-1.45844	-9.6405e-06	-1.45844	-1.17584e-05	-1.45844	-1.33911e-05	-1.45844	-1.42334e-05	-1.45844	-1.96106e-05
-1.45599	-9.39026e-06	-1.45599	-1.14532e-05	-1.45599	-1.30493e-05	-1.45599	-1.38794e-05	-1.45599	-1.9104e-05
-1.45355	-9.15833e-06	-1.45355	-1.11664e-05	-1.45355	-1.27258e-05	-1.45355	-1.35468e-05	-1.45355	-1.8631e-05
-1.45111	-8.9386e-06	-1.45111	-1.09009e-05	-1.45111	-1.24268e-05	-1.45111	-1.32416e-05	-1.45111	-1.81946e-05
-1.44867	-8.73108e-06	-1.44867	-1.06476e-05	-1.44867	-1.21399e-05	-1.44867	-1.29456e-05	-1.44867	-1.77765e-05
-1.44623	-8.53577e-06	-1.44623	-1.04126e-05	-1.44623	-1.18744e-05	-1.44623	-1.26709e-05	-1.44623	-1.73889e-05
-1.44379	-8.35266e-06	-1.44379	-1.01868e-05	-1.44379	-1.16211e-05	-1.44379	-1.24084e-05	-1.44379	-1.70197e-05
-1.44135	-8.17566e-06	-1.44135	-9.97009e-06	-1.44135	-1.138e-05	-1.44135	-1.21582e-05	-1.44135	-1.66687e-05
-1.4389	-8.00781e-06	-1.4389	-9.76563e-06	-1.4389	-1.11481e-05	-1.4389	-1.19232e-05	-1.4389	-1.63361e-05
-1.43646	-7.84607e-06	-1.43646	-9.57031e-06	-1.43646	-1.09314e-05	-1.43646	-1.16974e-05	-1.43646	-1.60217e-05
-1.43402	-7.69043e-06	-1.43402	-9.38416e-06	-1.43402	-1.07178e-05	-1.43402	-1.14777e-05	-1.43402	-1.57166e-05
-1.43158	-7.54395e-06	-1.43158	-9.20715e-06	-1.43158	-1.05194e-05	-1.43158	-1.12701e-05	-1.43158	-1.54297e-05
-1.42914	-7.40051e-06	-1.42914	-9.0332e-06	-1.42914	-1.03241e-05	-1.42914	-1.10718e-05	-1.42914	-1.51489e-05
-1.4267	-7.26624e-06	-1.4267	-8.87146e-06	-1.4267	-1.0144e-05	-1.4267	-1.08795e-05	-1.4267	-1.48895e-05
-1.42426	-7.13501e-06	-1.42426	-8.70972e-06	-1.42426	-9.96399e-06	-1.42426	-1.06964e-05	-1.42426	-1.46332e-05
-1.42181	-7.00989e-06	-1.42181	-8.56018e-06	-1.42181	-9.79614e-06	-1.42181	-1.05194e-05	-1.42181	-1.43921e-05
-1.41937	-6.89087e-06	-1.41937	-8.4137e-06	-1.41937	-9.63135e-06	-1.41937	-1.03485e-05	-1.41937	-1.41571e-05
-1.41693	-6.77185e-06	-1.41693	-8.27332e-06	-1.41693	-9.47266e-06	-1.41693	-1.01837e-05	-1.41693	-1.39313e-05
-1.41449	-6.65894e-06	-1.41449	-8.13293e-06	-1.41449	-9.31702e-06	-1.41449	-1.0022e-05	-1.41449	-1.37115e-05
-1.41205	-6.54907e-06	-1.41205	-8.00171e-06	-1.41205	-9.17053e-06	-1.41205	-9.86938e-06	-1.41205	-1.3501e-05
-1.40961	-6.44226e-06	-1.40961	-7.87048e-06	-1.40961	-9.02405e-06	-1.40961	-9.71985e-06	-1.40961	-1.32965e-05
-1.40717	-6.34155e-06	-1.40717	-7.75146e-06	-1.40717	-8.88672e-06	-1.40717	-9.57642e-06	-1.40717	-1.31042e-05
-1.40472	-6.24084e-06	-1.40472	-7.62939e-06	-1.40472	-8.75244e-06	-1.40472	-9.43298e-06	-1.40472	-1.2912e-05
-1.40228	-6.14319e-06	-1.40228	-7.51343e-06	-1.40228	-8.62427e-06	-1.40228	-9.29565e-06	-1.40228	-1.27289e-05
-1.39984	-6.05164e-06	-1.39984	-7.40051e-06	-1.39984	-8.49609e-06	-1.39984	-9.16443e-06	-1.39984	-1.25488e-05
-1.3974	-5.96008e-06	-1.3974	-7.29065e-06	-1.3974	-8.37402e-06	-1.3974	-9.0332e-06	-1.3974	-1.23749e-05
-1.39496	-5.86853e-06	-1.39496	-7.18079e-06	-1.39496	-8.255e-06	-1.39496	-8.90808e-06	-1.39496	-1.2204e-05
-1.39252	-5.78308e-06	-1.39252	-7.08008e-06	-1.39252	-8.13904e-06	-1.39252	-8.78601e-06	-1.39252	-1.20422e-05
-1.39008	-5.69763e-06	-1.39008	-6.97632e-06	-1.39008	-8.02612e-06	-1.39008	-8.66699e-06	-1.39008	-1.18835e-05
-1.38763	-5.61829e-06	-1.38763	-6.88171e-06	-1.38763	-7.91626e-06	-1.38763	-8.55408e-06	-1.38763	-1.1731e-05
-1.38519	-5.53894e-06	-1.38519	-6.78406e-06	-1.38519	-7.80945e-06	-1.38519	-8.43811e-06	-1.38519	-1.15753e-05
-1.38275	-5.45959e-06	-1.38275	-6.6925e-06	-1.38275	-7.70569e-06	-1.38275	-8.3313e-06	-1.38275	-1.14319e-05
-1.38031	-5.38635e-06	-1.38031	-6.604e-06	-1.38031	-7.60498e-06	-1.38031	-8.22449e-06	-1.38031	-1.12915e-05
-1.37787	-5.31006e-06	-1.37787	-6.5155e-06	-1.37787	-7.50732e-06	-1.37787	-8.12073e-06	-1.37787	-1.11511e-05
-1.37543	-5.23987e-06	-1.37543	-6.427e-06	-1.37543	-7.41272e-06	-1.37543	-8.01697e-06	-1.37543	-1.10138e-05
-1.37299	-5.16663e-06	-1.37299	-6.3446e-06	-1.37299	-7.31812e-06	-1.37299	-7.91931e-06	-1.37299	-1.08856e-05
-1.37054	-5.09949e-06	-1.37054	-6.25916e-06	-1.37054	-7.22351e-06	-1.37054	-7.82166e-06	-1.37054	-1.07544e-05
-1.3681	-5.03235e-06	-1.3681	-6.18286e-06	-1.3681	-7.13806e-06	-1.3681	-7.72705e-06	-1.3681	-1.06293e-05
-1.36566	-4.96521e-06	-1.36566	-6.10352e-06	-1.36566	-7.04956e-06	-1.36566	-7.63245e-06	-1.36566	-1.05072e-05
-1.36322	-4.90112e-06	-1.36322	-6.02722e-06	-1.36322	-6.96411e-06	-1.36322	-7.54395e-06	-1.36322	-1.03851e-05
-1.36078	-4.84009e-06	-1.36078	-5.95398e-06	-1.36078	-6.88171e-06	-1.36078	-7.45544e-06	-1.36078	-1.02692e-05
-1.35834	-4.77905e-06	-1.35834	-5.87769e-06	-1.35834	-6.79932e-06	-1.35834	-7.36694e-06	-1.35834	-1.01563e-05
-1.3559	-4.71802e-06	-1.3559	-5.8075e-06	-1.3559	-6.71997e-06	-1.3559	-7.28455e-06	-1.3559	-1.00433e-05
-1.35345	-4.65942e-06	-1.35345	-5.7373e-06	-1.35345	-6.64368e-06	-1.35345	-7.20215e-06	-1.35345	-9.93652e-06
-1.35101	-4.60266e-06	-1.35101	-5.66711e-06	-1.35101	-6.56433e-06	-1.35101	-7.11975e-06	-1.35101	-9.82666e-06
-1.34857	-4.5459e-06	-1.34857	-5.60303e-06	-1.34857	-6.49109e-06	-1.34857	-7.04041e-06	-1.34857	-9.72595e-06
-1.34613	-4.49005e-06	-1.34613	-5.53589e-06	-1.34613	-6.41785e-06	-1.34613	-6.96106e-06	-1.34613	-9.62219e-06
-1.34369	-4.43695e-06	-1.34369	-5.4718e-06	-1.34369	-6.34766e-06	-1.34369	-6.88782e-06	-1.34369	-9.52148e-06
-1.34125	-4.38446e-06	-1.34125	-5.41077e-06	-1.34125	-6.27747e-06	-1.34125	-6.81458e-06	-1.34125	-9.42383e-06
-1.33881	-4.33136e-06	-1.33881	-5.34973e-06	-1.33881	-6.20728e-06	-1.33881	-6.74133e-06	-1.33881	-9.32922e-06
-1.33636	-4.28101e-06	-1.33636	-5.2887e-06	-1.33636	-6.14014e-06	-1.33636	-6.66809e-06	-1.33636	-9.23157e-06
-1.33392	-4.23126e-06	-1.33392	-5.23071e-06	-1.33392	-6.07605e-06	-1.33392	-6.60095e-06	-1.33392	-9.14001e-06
-1.33148	-4.18243e-06	-1.33148	-5.17273e-06	-1.33148	-6.00891e-06	-1.33148	-6.53076e-06	-1.33148	-9.04846e-06
-1.32904	-4.13422e-06	-1.32904	-5.1178e-06	-1.32904	-5.94788e-06	-1.32904	-6.46667e-06	-1.32904	-8.96301e-06
-1.3266	-4.08661e-06	-1.3266	-5.05981e-06	-1.3266	-5.88379e-06	-1.3266	-6.39954e-06	-1.3266	-8.87451e-06
-1.32416	-4.04205e-06	-1.32416	-5.00488e-06	-1.32416	-5.82581e-06	-1.32416	-6.33545e-06	-1.32416	-8.79211e-06
-1.32172	-3.99658e-06	-1.32172	-4.953e-06	-1.32172	-5.76477e-06	-1.32172	-6.27136e-06	-1.32172	-8.70667e-06
-1.31927	-3.95264e-06	-1.31927	-4.90112e-06	-1.31927	-5.70679e-06	-1.31927	-6.20728e-06	-1.31927	-8.62732e-06
-1.31683	-3.90808e-06	-1.31683	-4.84924e-06	-1.31683	-5.6488e-06	-1.31683	-6.14624e-06	-1.31683	-8.54492e-06
-1.31439	-3.86505e-06	-1.31439	-4.79736e-06	-1.31439	-5.59387e-06	-1.31439	-6.08826e-06	-1.31439	-8.46863e-06
-1.31195	-3.82233e-06	-1.31195	-4.74854e-06	-1.31195	-5.53589e-06	-1.31195	-6.02722e-06	-1.31195	-8.39233e-06
-1.30951	-3.78357e-06	-1.30951	-4.70367e-06	-1.30951	-5.48401e-06	-1.30951	-5.97229e-06	-1.30951	-8.31604e-06
-1.30707	-3.74084e-06	-1.30707	-4.65485e-06	-1.30707	-5.42908e-06	-1.30707	-5.91431e-06	-1.30707	-8.2428e-06
-1.30463	-3.70331e-06	-1.30463	-4.60938e-06	-1.30463	-5.38025e-06	-1.30463	-5.86243e-06	-1.30463	-8.16956e-06
-1.30219	-3.66272e-06	-1.30219	-4.56421e-06	-1.30219	-5.32837e-06	-1.30219	-5.80444e-06	-1.30219	-8.09937e-06
-1.29974	-3.62549e-06	-1.29974	-4.51935e-06	-1.29974	-5.27954e-06	-1.29974	-5.75256e-06	-1.29974	-8.02917e-06
-1.2973	-3.58673e-06	-1.2973	-4.47449e-06	-1.2973	-5.22766e-06	-1.2973	-5.69763e-06	-1.2973	-7.95898e-06
-1.29486	-3.55011e-06	-1.29486	-4.43237e-06	-1.29486	-5.17883e-06	-1.29486	-5.6488e-06	-1.29486	-7.89185e-06
-1.29242	-3.51349e-06	-1.29242	-4.38995e-06	-1.29242	-5.13e-06	-1.29242	-5.59692e-06	-1.29242	-7.82471e-06
-1.28998	-3.4787e-06	-1.28998	-4.34967e-06	-1.28998	-5.08728e-06	-1.28998	-5.5481e-06	-1.28998	-7.76062e-06
-1.28754	-3.44269e-06	-1.28754	-4.30786e-06	-1.28754	-5.0415e-06	-1.28754	-5.50232e-06	-1.28754	-7.69653e-06
-1.2851	-3.4079e-06	-1.2851	-4.26788e-06	-1.2851	-4.99573e-06	-1.2851	-5.45349e-06	-1.2851	-7.63245e-06
-1.28265	-3.37524e-06	-1.28265	-4.22913e-06	-1.28265	-4.94995e-06	-1.28265	-5.40771e-06	-1.28265	-7.57141e-06
-1.28021	-3.34198e-06	-1.28021	-4.18915e-06	-1.28021	-4.91028e-06	-1.28021	-5.35889e-06	-1.28021	-7.51038e-06
-1.27777	-3.30902e-06	-1.27777	-4.15192e-06	-1.27777	-4.8645e-06	-1.27777	-5.31311e-06	-1.27777	-7.44934e-06
-1.27533	-3.27606e-06	-1.27533	-4.11469e-06	-1.27533	-4.82483e-06	-1.27533	-5.27039e-06	-1.27533	-7.39441e-06
-1.27289	-3.24432e-06	-1.27289	-4.07684e-06	-1.27289	-4.78302e-06	-1.27289	-5.22766e-06	-1.27289	-7.33337e-06
-1.27045	-3.2132e-06	-1.27045	-4.04205e-06	-1.27045	-4.74365e-06	-1.27045	-5.18494e-06	-1.27045	-7.27844e-06
-1.26801	-3.18146e-06	-1.26801	-4.00543e-06	-1.26801	-4.70306e-06	-1.26801	-5.14221e-06	-1.26801	-7.22351e-06
-1.26556	-3.15369e-06	-1.26556	-3.97156e-06	-1.26556	-4.66461e-06	-1.26556	-5.10254e-06	-1.26556	-7.16858e-06
-1.26312	-3.12225e-06	-1.26312	-3.93646e-06	-1.26312	-4.62616e-06	-1.26312	-5.05981e-06	-1.26312	-7.11365e-06
-1.26068	-3.09418e-06	-1.26068	-3.90289e-06	-1.26068	-4.58832e-06	-1.26068	-5.02014e-06	-1.26068	-7.06482e-06
-1.25824	-3.06488e-06	-1.25824	-3.86993e-06	-1.25824	-4.55048e-06	-1.25824	-4.98047e-06	-1.25824	-7.00989e-06
-1.2558	-3.03711e-06	-1.2558	-3.83789e-06	-1.2558	-4.51385e-06	-1.2558	-4.9408e-06	-1.2558	-6.96106e-06
-1.25336	-3.00812e-06	-1.25336	-3.80463e-06	-1.25336	-4.47784e-06	-1.25336	-4.90417e-06	-1.25336	-6.90918e-06
-1.25092	-2.98096e-06	-1.25092	-3.77411e-06	-1.25092	-4.44427e-06	-1.25092	-4.86755e-06	-1.25092	-6.86035e-06
-1.24847	-2.95349e-06	-1.24847	-3.74268e-06	-1.24847	-4.40887e-06	-1.24847	-4.83093e-06	-1.24847	-6.81152e-06
-1.24603	-2.92725e-06	-1.24603	-3.71155e-06	-1.24603	-4.37439e-06	-1.24603	-4.79431e-06	-1.24603	-6.76575e-06
-1.24359	-2.90131e-06	-1.24359	-3.68195e-06	-1.24359	-4.34174e-06	-1.24359	-4.75983e-06	-1.24359	-6.71692e-06
-1.24115	-2.87659e-06	-1.24115	-3.65295e-06	-1.24115	-4.30847e-06	-1.24115	-4.72412e-06	-1.24115	-6.67114e-06
-1.23871	-2.85034e-06	-1.23871	-3.62305e-06	-1.23871	-4.2746e-06	-1.23871	-4.68933e-06	-1.23871	-6.62231e-06
-1.23627	-2.82684e-06	-1.23627	-3.59436e-06	-1.23627	-4.24255e-06	-1.23627	-4.65607e-06	-1.23627	-6.57959e-06
-1.23383	-2.80182e-06	-1.23383	-3.56598e-06	-1.23383	-4.21021e-06	-1.23383	-4.62219e-06	-1.23383	-6.53381e-06
-1.23138	-2.77802e-06	-1.23138	-3.5376e-06	-1.23138	-4.1806e-06	-1.23138	-4.58893e-06	-1.23138	-6.49109e-06
-1.22894	-2.75421e-06	-1.22894	-3.51227e-06	-1.22894	-4.14948e-06	-1.22894	-4.55719e-06	-1.22894	-6.44531e-06
-1.2265	-2.73102e-06	-1.2265	-3.48511e-06	-1.2265	-4.11865e-06	-1.2265	-4.52515e-06	-1.2265	-6.40564e-06
-1.22406	-2.70813e-06	-1.22406	-3.45795e-06	-1.22406	-4.08875e-06	-1.22406	-4.49402e-06	-1.22406	-6.36292e-06
-1.22162	-2.68524e-06	-1.22162	-3.4314e-06	-1.22162	-4.06036e-06	-1.22162	-4.4632e-06	-1.22162	-6.32324e-06
-1.21918	-2.66144e-06	-1.21918	-3.40607e-06	-1.21918	-4.03137e-06	-1.21918	-4.43176e-06	-1.21918	-6.28357e-06
-1.21674	-2.64069e-06	-1.21674	-3.38165e-06	-1.21674	-4.00269e-06	-1.21674	-4.40216e-06	-1.21674	-6.2439e-06
-1.21429	-2.61871e-06	-1.21429	-3.35571e-06	-1.21429	-3.97339e-06	-1.21429	-4.37134e-06	-1.21429	-6.20422e-06
-1.21185	-2.59888e-06	-1.21185	-3.33252e-06	-1.21185	-3.94714e-06	-1.21185	-4.34387e-06	-1.21185	-6.16455e-06
-1.20941	-2.57751e-06	-1.20941	-3.30719e-06	-1.20941	-3.92029e-06	-1.20941	-4.3161e-06	-1.20941	-6.12793e-06
-1.20697	-2.55676e-06	-1.20697	-3.2843e-06	-1.20697	-3.89252e-06	-1.20697	-4.28772e-06	-1.20697	-6.08826e-06
-1.20453	-2.53601e-06	-1.20453	-3.25928e-06	-1.20453	-3.86627e-06	-1.20453	-4.25934e-06	-1.20453	-6.05164e-06
-1.20209	-2.51648e-06	-1.20209	-3.23792e-06	-1.20209	-3.83972e-06	-1.20209	-4.23187e-06	-1.20209	-6.01501e-06
-1.19965	-2.49695e-06	-1.19965	-3.21564e-06	-1.19965	-3.81287e-06	-1.19965	-4.20441e-06	-1.19965	-5.97839e-06
-1.1972	-2.47772e-06	-1.1972	-3.19366e-06	-1.1972	-3.78967e-06	-1.1972	-4.17908e-06	-1.1972	-5.94482e-06
-1.19476	-2.45789e-06	-1.19476	-3.17108e-06	-1.19476	-3.76312e-06	-1.19476	-4.15222e-06	-1.19476	-5.9082e-06
-1.19232	-2.43896e-06	-1.19232	-3.15125e-06	-1.19232	-3.73932e-06	-1.19232	-4.12567e-06	-1.19232	-5.87463e-06
-1.18988	-2.42096e-06	-1.18988	-3.12866e-06	-1.18988	-3.71429e-06	-1.18988	-4.10004e-06	-1.18988	-5.83801e-06
-1.18744	-2.40356e-06	-1.18744	-3.10974e-06	-1.18744	-3.6908e-06	-1.18744	-4.07501e-06	-1.18744	-5.8075e-06
-1.185	-2.38525e-06	-1.185	-3.08807e-06	-1.185	-3.66699e-06	-1.185	-4.04968e-06	-1.185	-5.77087e-06
-1.18256	-2.36755e-06	-1.18256	-3.06885e-06	-1.18256	-3.64349e-06	-1.18256	-4.02496e-06	-1.18256	-5.74036e-06
-1.18011	-2.34985e-06	-1.18011	-3.04901e-06	-1.18011	-3.61908e-06	-1.18011	-4.00085e-06	-1.18011	-5.70679e-06
-1.17767	-2.33307e-06	-1.17767	-3.02887e-06	-1.17767	-3.59741e-06	-1.17767	-3.97736e-06	-1.17767	-5.67627e-06
-1.17523	-2.31567e-06	-1.17523	-3.00781e-06	-1.17523	-3.57483e-06	-1.17523	-3.95294e-06	-1.17523	-5.6427e-06
-1.17279	-2.2995e-06	-1.17279	-2.9895e-06	-1.17279	-3.55438e-06	-1.17279	-3.92944e-06	-1.17279	-5.61218e-06
-1.17035	-2.28302e-06	-1.17035	-2.96875e-06	-1.17035	-3.53058e-06	-1.17035	-3.90533e-06	-1.17035	-5.58167e-06
-1.16791	-2.26715e-06	-1.16791	-2.95074e-06	-1.16791	-3.50891e-06	-1.16791	-3.88336e-06	-1.16791	-5.55115e-06
-1.16547	-2.25098e-06	-1.16547	-2.93152e-06	-1.16547	-3.48755e-06	-1.16547	-3.86139e-06	-1.16547	-5.52063e-06
-1.16302	-2.23541e-06	-1.16302	-2.9129e-06	-1.16302	-3.4671e-06	-1.16302	-3.83911e-06	-1.16302	-5.49011e-06
-1.16058	-2.21954e-06	-1.16058	-2.89429e-06	-1.16058	-3.44635e-06	-1.16058	-3.81714e-06	-1.16058	-5.45959e-06
-1.15814	-2.20428e-06	-1.15814	-2.87567e-06	-1.15814	-3.42621e-06	-1.15814	-3.79578e-06	-1.15814	-5.43213e-06
-1.1557	-2.18964e-06	-1.1557	-2.85736e-06	-1.1557	-3.40515e-06	-1.1557	-3.77441e-06	-1.1557	-5.40161e-06
-1.15326	-2.17438e-06	-1.15326	-2.84058e-06	-1.15326	-3.38623e-06	-1.15326	-3.75427e-06	-1.15326	-5.37415e-06
-1.15082	-2.15973e-06	-1.15082	-2.82288e-06	-1.15082	-3.36639e-06	-1.15082	-3.73322e-06	-1.15082	-5.34668e-06
-1.14838	-2.146e-06	-1.14838	-2.80609e-06	-1.14838	-3.34625e-06	-1.14838	-3.71185e-06	-1.14838	-5.31921e-06
-1.14594	-2.13165e-06	-1.14594	-2.78992e-06	-1.14594	-3.32764e-06	-1.14594	-3.69263e-06	-1.14594	-5.29175e-06
-1.14349	-2.117e-06	-1.14349	-2.77283e-06	-1.14349	-3.30811e-06	-1.14349	-3.67249e-06	-1.14349	-5.26428e-06
-1.14105	-2.10327e-06	-1.14105	-2.75726e-06	-1.14105	-3.28857e-06	-1.14105	-3.65265e-06	-1.14105	-5.23682e-06
-1.13861	-2.09167e-06	-1.13861	-2.74017e-06	-1.13861	-3.27148e-06	-1.13861	-3.63403e-06	-1.13861	-5.20935e-06
-1.13617	-2.07581e-06	-1.13617	-2.72522e-06	-1.13617	-3.25317e-06	-1.13617	-3.61389e-06	-1.13617	-5.18494e-06
-1.13373	-2.0636e-06	-1.13373	-2.70935e-06	-1.13373	-3.23395e-06	-1.13373	-3.5965e-06	-1.13373	-5.15747e-06
-1.13129	-2.05048e-06	-1.13129	-2.69287e-06	-1.13129	-3.21777e-06	-1.13129	-3.57727e-06	-1.13129	-5.13306e-06
-1.12885	-2.03735e-06	-1.12885	-2.67792e-06	-1.12885	-3.19885e-06	-1.12885	-3.56018e-06	-1.12885	-5.10864e-06
-1.1264	-2.02576e-06	-1.1264	-2.66357e-06	-1.1264	-3.18237e-06	-1.1264	-3.54156e-06	-1.1264	-5.08423e-06
-1.12396	-2.01294e-06	-1.12396	-2.64709e-06	-1.12396	-3.16528e-06	-1.12396	-3.52295e-06	-1.12396	-5.05981e-06
-1.12152	-2.00134e-06	-1.12152	-2.63153e-06	-1.12152	-3.14789e-06	-1.12152	-3.50494e-06	-1.12152	-5.0354e-06
-1.11908	-1.98792e-06	-1.11908	-2.6178e-06	-1.11908	-3.13141e-06	-1.11908	-3.48907e-06	-1.11908	-5.01099e-06
-1.11664	-1.97632e-06	-1.11664	-2.60345e-06	-1.11664	-3.11523e-06	-1.11664	-3.47015e-06	-1.11664	-4.98657e-06
-1.1142	-1.96472e-06	-1.1142	-2.58942e-06	-1.1142	-3.1012e-06	-1.1142	-3.4549e-06	-1.1142	-4.96521e-06
-1.11176	-1.9519e-06	-1.11176	-2.57446e-06	-1.11176	-3.08319e-06	-1.11176	-3.43689e-06	-1.11176	-4.93774e-06
-1.10931	-1.94092e-06	-1.10931	-2.56134e-06	-1.10931	-3.06885e-06	-1.10931	-3.42133e-06	-1.10931	-4.91638e-06
-1.10687	-1.92932e-06	-1.10687	-2.54852e-06	-1.10687	-3.05298e-06	-1.10687	-3.40454e-06	-1.10687	-4.89197e-06
-1.10443	-1.91803e-06	-1.10443	-2.53387e-06	-1.10443	-3.03711e-06	-1.10443	-3.38745e-06	-1.10443	-4.87152e-06
-1.10199	-1.90704e-06	-1.10199	-2.52014e-06	-1.10199	-3.02155e-06	-1.10199	-3.37067e-06	-1.10199	-4.84863e-06
-1.09955	-1.89606e-06	-1.09955	-2.50732e-06	-1.09955	-3.00629e-06	-1.09955	-3.35571e-06	-1.09955	-4.82697e-06
-1.09711	-1.88507e-06	-1.09711	-2.49329e-06	-1.09711	-2.99072e-06	-1.09711	-3.33954e-06	-1.09711	-4.80469e-06
-1.09467	-1.87561e-06	-1.09467	-2.48169e-06	-1.09467	-2.97668e-06	-1.09467	-3.32428e-06	-1.09467	-4.78394e-06
-1.09222	-1.8631e-06	-1.09222	-2.46826e-06	-1.09222	-2.96265e-06	-1.09222	-3.30872e-06	-1.09222	-4.76196e-06
-1.08978	-1.85303e-06	-1.08978	-2.45575e-06	-1.08978	-2.94708e-06	-1.08978	-3.29285e-06	-1.08978	-4.73969e-06
-1.08734	-1.84357e-06	-1.08734	-2.44263e-06	-1.08734	-2.93335e-06	-1.08734	-3.27698e-06	-1.08734	-4.71863e-06
-1.0849	-1.83228e-06	-1.0849	-2.43103e-06	-1.0849	-2.91809e-06	-1.0849	-3.26294e-06	-1.0849	-4.69849e-06
-1.08246	-1.82159e-06	-1.08246	-2.4176e-06	-1.08246	-2.90466e-06	-1.08246	-3.24707e-06	-1.08246	-4.67682e-06
-1.08002	-1.81213e-06	-1.08002	-2.40601e-06	-1.08002	-2.89124e-06	-1.08002	-3.23334e-06	-1.08002	-4.65576e-06
-1.07758	-1.80237e-06	-1.07758	-2.3938e-06	-1.07758	-2.87567e-06	-1.07758	-3.21747e-06	-1.07758	-4.63562e-06
-1.07513	-1.7923e-06	-1.07513	-2.3822e-06	-1.07513	-2.86407e-06	-1.07513	-3.20404e-06	-1.07513	-4.61578e-06
-1.07269	-1.78345e-06	-1.07269	-2.37e-06	-1.07269	-2.8479e-06	-1.07269	-3.19031e-06	-1.07269	-4.59503e-06
-1.07025	-1.77307e-06	-1.07025	-2.3587e-06	-1.07025	-2.83569e-06	-1.07025	-3.17596e-06	-1.07025	-4.57489e-06
-1.06781	-1.76361e-06	-1.06781	-2.34619e-06	-1.06781	-2.82196e-06	-1.06781	-3.16223e-06	-1.06781	-4.55505e-06
-1.06537	-1.75323e-06	-1.06537	-2.33459e-06	-1.06537	-2.80853e-06	-1.06537	-3.14819e-06	-1.06537	-4.53461e-06
-1.06293	-1.74438e-06	-1.06293	-2.32239e-06	-1.06293	-2.7948e-06	-1.06293	-3.13354e-06	-1.06293	-4.51538e-06
-1.06049	-1.73462e-06	-1.06049	-2.31079e-06	-1.06049	-2.78198e-06	-1.06049	-3.12134e-06	-1.06049	-4.49615e-06
-1.05804	-1.72577e-06	-1.05804	-2.30011e-06	-1.05804	-2.76855e-06	-1.05804	-3.1073e-06	-1.05804	-4.47662e-06
-1.0556	-1.71692e-06	-1.0556	-2.28821e-06	-1.0556	-2.75574e-06	-1.0556	-3.09326e-06	-1.0556	-4.4577e-06
-1.05316	-1.70807e-06	-1.05316	-2.27661e-06	-1.05316	-2.742e-06	-1.05316	-3.07983e-06	-1.05316	-4.43756e-06
-1.05072	-1.69769e-06	-1.05072	-2.26593e-06	-1.05072	-2.73041e-06	-1.05072	-3.06763e-06	-1.05072	-4.41986e-06
-1.04828	-1.68793e-06	-1.04828	-2.25525e-06	-1.04828	-2.71851e-06	-1.04828	-3.05389e-06	-1.04828	-4.40063e-06
-1.04584	-1.6806e-06	-1.04584	-2.24487e-06	-1.04584	-2.70538e-06	-1.04584	-3.04138e-06	-1.04584	-4.38141e-06
-1.0434	-1.67053e-06	-1.0434	-2.23419e-06	-1.0434	-2.69287e-06	-1.0434	-3.02795e-06	-1.0434	-4.36462e-06
-1.04095	-1.6629e-06	-1.04095	-2.22321e-06	-1.04095	-2.68127e-06	-1.04095	-3.01727e-06	-1.04095	-4.34631e-06
-1.03851	-1.65405e-06	-1.03851	-2.21283e-06	-1.03851	-2.66937e-06	-1.03851	-3.00323e-06	-1.03851	-4.32739e-06
-1.03607	-1.64581e-06	-1.03607	-2.20215e-06	-1.03607	-2.65778e-06	-1.03607	-2.99194e-06	-1.03607	-4.31091e-06
-1.03363	-1.63605e-06	-1.03363	-2.19208e-06	-1.03363	-2.64587e-06	-1.03363	-2.97882e-06	-1.03363	-4.29169e-06
-1.03119	-1.62872e-06	-1.03119	-2.18231e-06	-1.03119	-2.63428e-06	-1.03119	-2.96753e-06	-1.03119	-4.27429e-06
-1.02875	-1.61957e-06	-1.02875	-2.17133e-06	-1.02875	-2.62177e-06	-1.02875	-2.95502e-06	-1.02875	-4.2569e-06
-1.02631	-1.61255e-06	-1.02631	-2.16217e-06	-1.02631	-2.61108e-06	-1.02631	-2.9422e-06	-1.02631	-4.24011e-06
-1.02386	-1.604e-06	-1.02386	-2.15149e-06	-1.02386	-2.59949e-06	-1.02386	-2.92999e-06	-1.02386	-4.22211e-06
-1.02142	-1.59637e-06	-1.02142	-2.14264e-06	-1.02142	-2.5882e-06	-1.02142	-2.91901e-06	-1.02142	-4.20563e-06
-1.01898	-1.58783e-06	-1.01898	-2.13196e-06	-1.01898	-2.57568e-06	-1.01898	-2.90649e-06	-1.01898	-4.18793e-06
-1.01654	-1.58112e-06	-1.01654	-2.12341e-06	-1.01654	-2.56531e-06	-1.01654	-2.8952e-06	-1.01654	-4.17236e-06
-1.0141	-1.57349e-06	-1.0141	-2.11243e-06	-1.0141	-2.55371e-06	-1.0141	-2.88513e-06	-1.0141	-4.15497e-06
-1.01166	-1.56464e-06	-1.01166	-2.10419e-06	-1.01166	-2.54395e-06	-1.01166	-2.87323e-06	-1.01166	-4.13879e-06
-1.00922	-1.5567e-06	-1.00922	-2.09381e-06	-1.00922	-2.53235e-06	-1.00922	-2.86163e-06	-1.00922	-4.12262e-06
-1.00677	-1.54846e-06	-1.00677	-2.08466e-06	-1.00677	-2.52197e-06	-1.00677	-2.84943e-06	-1.00677	-4.10553e-06
-1.00433	-1.54053e-06	-1.00433	-2.07489e-06	-1.00433	-2.5116e-06	-1.00433	-2.83905e-06	-1.00433	-4.08936e-06
-1.00189	-1.5329e-06	-1.00189	-2.06604e-06	-1.00189	-2.50092e-06	-1.00189	-2.82776e-06	-1.00189	-4.07318e-06
-0.99945	-1.52588e-06	-0.99945	-2.05658e-06	-0.99945	-2.48962e-06	-0.99945	-2.81586e-06	-0.99945	-4.05701e-06
-0.99701	-1.51855e-06	-0.99701	-2.04895e-06	-0.99701	-2.47986e-06	-0.99701	-2.80579e-06	-0.99701	-4.04266e-06
-0.99457	-1.5094e-06	-0.99457	-2.03827e-06	-0.99457	-2.46918e-06	-0.99457	-2.7951e-06	-0.99457	-4.02588e-06
-0.99213	-1.50238e-06	-0.99213	-2.02972e-06	-0.99213	-2.4588e-06	-0.99213	-2.78473e-06	-0.99213	-4.01184e-06
-0.98969	-1.49384e-06	-0.98969	-2.02087e-06	-0.98969	-2.44904e-06	-0.98969	-2.77435e-06	-0.98969	-3.99567e-06
-0.98724	-1.48743e-06	-0.98724	-2.01202e-06	-0.98724	-2.43988e-06	-0.98724	-2.76398e-06	-0.98724	-3.9798e-06
-0.9848	-1.4801e-06	-0.9848	-2.00226e-06	-0.9848	-2.42889e-06	-0.9848	-2.75299e-06	-0.9848	-3.96362e-06
-0.98236	-1.47339e-06	-0.98236	-1.99402e-06	-0.98236	-2.42004e-06	-0.98236	-2.74292e-06	-0.98236	-3.94928e-06
-0.97992	-1.46545e-06	-0.97992	-1.98547e-06	-0.97992	-2.40875e-06	-0.97992	-2.73163e-06	-0.97992	-3.93463e-06
-0.97748	-1.45935e-06	-0.97748	-1.97632e-06	-0.97748	-2.3999e-06	-0.97748	-2.72339e-06	-0.97748	-3.91937e-06
-0.97504	-1.45203e-06	-0.97504	-1.96777e-06	-0.97504	-2.39044e-06	-0.97504	-2.7121e-06	-0.97504	-3.9035e-06
-0.9726	-1.44501e-06	-0.9726	-1.96075e-06	-0.9726	-2.38159e-06	-0.9726	-2.70294e-06	-0.9726	-3.88855e-06
-0.97015	-1.43799e-06	-0.97015	-1.9516e-06	-0.97015	-2.37213e-06	-0.97015	-2.69348e-06	-0.97015	-3.87573e-06
-0.96771	-1.43066e-06	-0.96771	-1.94336e-06	-0.96771	-2.36267e-06	-0.96771	-2.68341e-06	-0.96771	-3.86047e-06
-0.96527	-1.42365e-06	-0.96527	-1.93451e-06	-0.96527	-2.35229e-06	-0.96527	-2.67273e-06	-0.96527	-3.84552e-06
-0.96283	-1.41785e-06	-0.96283	-1.92627e-06	-0.96283	-2.34314e-06	-0.96283	-2.66235e-06	-0.96283	-3.83057e-06
-0.96039	-1.41113e-06	-0.96039	-1.91864e-06	-0.96039	-2.33429e-06	-0.96039	-2.6532e-06	-0.96039	-3.81622e-06
-0.95795	-1.40411e-06	-0.95795	-1.90979e-06	-0.95795	-2.32452e-06	-0.95795	-2.64374e-06	-0.95795	-3.8031e-06
-0.95551	-1.3974e-06	-0.95551	-1.90216e-06	-0.95551	-2.31537e-06	-0.95551	-2.63489e-06	-0.95551	-3.78693e-06
-0.95306	-1.39252e-06	-0.95306	-1.89331e-06	-0.95306	-2.3056e-06	-0.95306	-2.62482e-06	-0.95306	-3.77472e-06
-0.95062	-1.3858e-06	-0.95062	-1.88568e-06	-0.95062	-2.29645e-06	-0.95062	-2.61536e-06	-0.95062	-3.76038e-06
-0.94818	-1.37817e-06	-0.94818	-1.87714e-06	-0.94818	-2.2879e-06	-0.94818	-2.60681e-06	-0.94818	-3.74573e-06
-0.94574	-1.37146e-06	-0.94574	-1.86829e-06	-0.94574	-2.27783e-06	-0.94574	-2.59674e-06	-0.94574	-3.73138e-06
-0.9433	-1.36627e-06	-0.9433	-1.86279e-06	-0.9433	-2.26929e-06	-0.9433	-2.58728e-06	-0.9433	-3.71643e-06
-0.94086	-1.35956e-06	-0.94086	-1.85333e-06	-0.94086	-2.25922e-06	-0.94086	-2.57813e-06	-0.94086	-3.70239e-06
-0.93842	-1.35376e-06	-0.93842	-1.8457e-06	-0.93842	-2.25037e-06	-0.93842	-2.56989e-06	-0.93842	-3.68774e-06
-0.93597	-1.34705e-06	-0.93597	-1.83807e-06	-0.93597	-2.24213e-06	-0.93597	-2.55981e-06	-0.93597	-3.67523e-06
-0.93353	-1.34125e-06	-0.93353	-1.83014e-06	-0.93353	-2.23419e-06	-0.93353	-2.55157e-06	-0.93353	-3.66119e-06
-0.93109	-1.33575e-06	-0.93109	-1.82312e-06	-0.93109	-2.22412e-06	-0.93109	-2.54272e-06	-0.93109	-3.64777e-06
-0.92865	-1.33057e-06	-0.92865	-1.8158e-06	-0.92865	-2.21497e-06	-0.92865	-2.53357e-06	-0.92865	-3.63403e-06
-0.92621	-1.32507e-06	-0.92621	-1.80786e-06	-0.92621	-2.20673e-06	-0.92621	-2.52502e-06	-0.92621	-3.61969e-06
-0.92377	-1.31866e-06	-0.92377	-1.80054e-06	-0.92377	-2.19727e-06	-0.92377	-2.51526e-06	-0.92377	-3.60779e-06
-0.92133	-1.31226e-06	-0.92133	-1.79199e-06	-0.92133	-2.18964e-06	-0.92133	-2.50519e-06	-0.92133	-3.59344e-06
-0.91888	-1.30646e-06	-0.91888	-1.78558e-06	-0.91888	-2.1814e-06	-0.91888	-2.49756e-06	-0.91888	-3.57971e-06
-0.91644	-1.30157e-06	-0.91644	-1.77673e-06	-0.91644	-2.17163e-06	-0.91644	-2.48871e-06	-0.91644	-3.56628e-06
-0.914	-1.29517e-06	-0.914	-1.77063e-06	-0.914	-2.16461e-06	-0.914	-2.48016e-06	-0.914	-3.55286e-06
-0.91156	-1.28998e-06	-0.91156	-1.7627e-06	-0.91156	-2.15668e-06	-0.91156	-2.4704e-06	-0.91156	-3.54065e-06
-0.90912	-1.28296e-06	-0.90912	-1.75568e-06	-0.90912	-2.14722e-06	-0.90912	-2.46185e-06	-0.90912	-3.52692e-06
-0.90668	-1.27808e-06	-0.90668	-1.74774e-06	-0.90668	-2.13898e-06	-0.90668	-2.45392e-06	-0.90668	-3.51318e-06
-0.90424	-1.27228e-06	-0.90424	-1.74103e-06	-0.90424	-2.13196e-06	-0.90424	-2.44507e-06	-0.90424	-3.50098e-06
-0.90179	-1.26556e-06	-0.90179	-1.73462e-06	-0.90179	-2.12341e-06	-0.90179	-2.43622e-06	-0.90179	-3.48816e-06
-0.89935	-1.25916e-06	-0.89935	-1.72699e-06	-0.89935	-2.11487e-06	-0.89935	-2.42737e-06	-0.89935	-3.47626e-06
-0.89691	-1.25427e-06	-0.89691	-1.71875e-06	-0.89691	-2.10693e-06	-0.89691	-2.42004e-06	-0.89691	-3.46344e-06
-0.89447	-1.24786e-06	-0.89447	-1.71295e-06	-0.89447	-2.099e-06	-0.89447	-2.4115e-06	-0.89447	-3.45093e-06
-0.89203	-1.24237e-06	-0.89203	-1.70502e-06	-0.89203	-2.09076e-06	-0.89203	-2.40295e-06	-0.89203	-3.43597e-06
-0.88959	-1.23566e-06	-0.88959	-1.69861e-06	-0.88959	-2.08252e-06	-0.88959	-2.39319e-06	-0.88959	-3.42438e-06
-0.88715	-1.22955e-06	-0.88715	-1.69098e-06	-0.88715	-2.07336e-06	-0.88715	-2.38495e-06	-0.88715	-3.41095e-06
-0.8847	-1.22406e-06	-0.8847	-1.68396e-06	-0.8847	-2.06665e-06	-0.8847	-2.37732e-06	-0.8847	-3.39996e-06
-0.88226	-1.21826e-06	-0.88226	-1.67603e-06	-0.88226	-2.05841e-06	-0.88226	-2.36786e-06	-0.88226	-3.38776e-06
-0.87982	-1.21246e-06	-0.87982	-1.66962e-06	-0.87982	-2.05078e-06	-0.87982	-2.35992e-06	-0.87982	-3.37524e-06
-0.87738	-1.20667e-06	-0.87738	-1.6626e-06	-0.87738	-2.04132e-06	-0.87738	-2.35229e-06	-0.87738	-3.36212e-06
-0.87494	-1.20148e-06	-0.87494	-1.65619e-06	-0.87494	-2.03369e-06	-0.87494	-2.34375e-06	-0.87494	-3.34961e-06
-0.8725	-1.19568e-06	-0.8725	-1.64886e-06	-0.8725	-2.02667e-06	-0.8725	-2.3349e-06	-0.8725	-3.33679e-06
-0.87006	-1.19049e-06	-0.87006	-1.64215e-06	-0.87006	-2.01874e-06	-0.87006	-2.32666e-06	-0.87006	-3.32581e-06
-0.86761	-1.185e-06	-0.86761	-1.63513e-06	-0.86761	-2.0108e-06	-0.86761	-2.31873e-06	-0.86761	-3.31238e-06
-0.86517	-1.17859e-06	-0.86517	-1.62872e-06	-0.86517	-2.00195e-06	-0.86517	-2.31018e-06	-0.86517	-3.29956e-06
-0.86273	-1.17249e-06	-0.86273	-1.62201e-06	-0.86273	-1.99554e-06	-0.86273	-2.30194e-06	-0.86273	-3.28827e-06
-0.86029	-1.1673e-06	-0.86029	-1.61652e-06	-0.86029	-1.98761e-06	-0.86029	-2.29309e-06	-0.86029	-3.27667e-06
-0.85785	-1.16211e-06	-0.85785	-1.60797e-06	-0.85785	-1.97784e-06	-0.85785	-2.28638e-06	-0.85785	-3.26324e-06
-0.85541	-1.15692e-06	-0.85541	-1.60187e-06	-0.85541	-1.97113e-06	-0.85541	-2.27692e-06	-0.85541	-3.25104e-06
-0.85297	-1.15173e-06	-0.85297	-1.59485e-06	-0.85297	-1.9635e-06	-0.85297	-2.2702e-06	-0.85297	-3.24036e-06
-0.85052	-1.14655e-06	-0.85052	-1.58844e-06	-0.85052	-1.95679e-06	-0.85052	-2.26135e-06	-0.85052	-3.22693e-06
-0.84808	-1.14105e-06	-0.84808	-1.58173e-06	-0.84808	-1.94763e-06	-0.84808	-2.2522e-06	-0.84808	-3.21564e-06
-0.84564	-1.13586e-06	-0.84564	-1.57532e-06	-0.84564	-1.94061e-06	-0.84564	-2.24548e-06	-0.84564	-3.20404e-06
-0.8432	-1.13068e-06	-0.8432	-1.5686e-06	-0.8432	-1.93298e-06	-0.8432	-2.23663e-06	-0.8432	-3.19122e-06
-0.84076	-1.12457e-06	-0.84076	-1.56097e-06	-0.84076	-1.92505e-06	-0.84076	-2.22931e-06	-0.84076	-3.17932e-06
-0.83832	-1.1203e-06	-0.83832	-1.55457e-06	-0.83832	-1.91833e-06	-0.83832	-2.22046e-06	-0.83832	-3.16742e-06
-0.83588	-1.11481e-06	-0.83588	-1.54755e-06	-0.83588	-1.9101e-06	-0.83588	-2.21344e-06	-0.83588	-3.15552e-06
-0.83344	-1.10962e-06	-0.83344	-1.54114e-06	-0.83344	-1.90216e-06	-0.83344	-2.20459e-06	-0.83344	-3.14392e-06
-0.83099	-1.10413e-06	-0.83099	-1.53534e-06	-0.83099	-1.89484e-06	-0.83099	-2.19727e-06	-0.83099	-3.13293e-06
-0.82855	-1.09802e-06	-0.82855	-1.52802e-06	-0.82855	-1.8866e-06	-0.82855	-2.18811e-06	-0.82855	-3.11859e-06
-0.82611	-1.09406e-06	-0.82611	-1.52222e-06	-0.82611	-1.87897e-06	-0.82611	-2.1817e-06	-0.82611	-3.10852e-06
-0.82367	-1.08765e-06	-0.82367	-1.51581e-06	-0.82367	-1.87012e-06	-0.82367	-2.17407e-06	-0.82367	-3.0957e-06
-0.82123	-1.08307e-06	-0.82123	-1.50818e-06	-0.82123	-1.86401e-06	-0.82123	-2.16522e-06	-0.82123	-3.08411e-06
-0.81879	-1.07758e-06	-0.81879	-1.50177e-06	-0.81879	-1.85577e-06	-0.81879	-2.15759e-06	-0.81879	-3.0719e-06
-0.81635	-1.07208e-06	-0.81635	-1.49536e-06	-0.81635	-1.84875e-06	-0.81635	-2.14966e-06	-0.81635	-3.05969e-06
-0.8139	-1.06689e-06	-0.8139	-1.48895e-06	-0.8139	-1.84143e-06	-0.8139	-2.1405e-06	-0.8139	-3.04932e-06
-0.81146	-1.06201e-06	-0.81146	-1.48132e-06	-0.81146	-1.8335e-06	-0.81146	-2.13318e-06	-0.81146	-3.03711e-06
-0.80902	-1.05682e-06	-0.80902	-1.47552e-06	-0.80902	-1.82556e-06	-0.80902	-2.12494e-06	-0.80902	-3.0246e-06
-0.80658	-1.05133e-06	-0.80658	-1.46912e-06	-0.80658	-1.81915e-06	-0.80658	-2.11853e-06	-0.80658	-3.01361e-06
-0.80414	-1.04584e-06	-0.80414	-1.46301e-06	-0.80414	-1.8103e-06	-0.80414	-2.10907e-06	-0.80414	-3.00079e-06
-0.8017	-1.04187e-06	-0.8017	-1.4563e-06	-0.8017	-1.80267e-06	-0.8017	-2.10114e-06	-0.8017	-2.9892e-06
-0.79926	-1.03485e-06	-0.79926	-1.44928e-06	-0.79926	-1.79474e-06	-0.79926	-2.0932e-06	-0.79926	-2.97791e-06
-0.79681	-1.03027e-06	-0.79681	-1.44379e-06	-0.79681	-1.78802e-06	-0.79681	-2.08588e-06	-0.79681	-2.96661e-06
-0.79437	-1.02539e-06	-0.79437	-1.43646e-06	-0.79437	-1.7807e-06	-0.79437	-2.07794e-06	-0.79437	-2.9541e-06
-0.79193	-1.0202e-06	-0.79193	-1.42975e-06	-0.79193	-1.77338e-06	-0.79193	-2.07092e-06	-0.79193	-2.94159e-06
-0.78949	-1.01501e-06	-0.78949	-1.42365e-06	-0.78949	-1.76544e-06	-0.78949	-2.06329e-06	-0.78949	-2.92908e-06
-0.78705	-1.00983e-06	-0.78705	-1.41846e-06	-0.78705	-1.75812e-06	-0.78705	-2.05444e-06	-0.78705	-2.91809e-06
-0.78461	-1.00555e-06	-0.78461	-1.41113e-06	-0.78461	-1.7514e-06	-0.78461	-2.04651e-06	-0.78461	-2.90649e-06
-0.78217	-9.99451e-07	-0.78217	-1.40564e-06	-0.78217	-1.74347e-06	-0.78217	-2.03857e-06	-0.78217	-2.89429e-06
-0.77972	-9.95483e-07	-0.77972	-1.39862e-06	-0.77972	-1.73615e-06	-0.77972	-2.03064e-06	-0.77972	-2.8833e-06
-0.77728	-9.8999e-07	-0.77728	-1.39221e-06	-0.77728	-1.72852e-06	-0.77728	-2.02271e-06	-0.77728	-2.87109e-06
-0.77484	-9.85107e-07	-0.77484	-1.3855e-06	-0.77484	-1.7215e-06	-0.77484	-2.01447e-06	-0.77484	-2.85858e-06
-0.7724	-9.79614e-07	-0.7724	-1.38e-06	-0.7724	-1.71387e-06	-0.7724	-2.00714e-06	-0.7724	-2.84821e-06
-0.76996	-9.75037e-07	-0.76996	-1.3736e-06	-0.76996	-1.70563e-06	-0.76996	-1.99829e-06	-0.76996	-2.83386e-06
-0.76752	-9.70154e-07	-0.76752	-1.3678e-06	-0.76752	-1.69922e-06	-0.76752	-1.99097e-06	-0.76752	-2.82379e-06
-0.76508	-9.64661e-07	-0.76508	-1.36108e-06	-0.76508	-1.69159e-06	-0.76508	-1.9812e-06	-0.76508	-2.80945e-06
-0.76263	-9.60083e-07	-0.76263	-1.35406e-06	-0.76263	-1.68457e-06	-0.76263	-1.9751e-06	-0.76263	-2.79938e-06
-0.76019	-9.552e-07	-0.76019	-1.34827e-06	-0.76019	-1.67664e-06	-0.76019	-1.96564e-06	-0.76019	-2.78656e-06
-0.75775	-9.49097e-07	-0.75775	-1.34155e-06	-0.75775	-1.66901e-06	-0.75775	-1.95862e-06	-0.75775	-2.77496e-06
-0.75531	-9.45129e-07	-0.75531	-1.33545e-06	-0.75531	-1.66321e-06	-0.75531	-1.95038e-06	-0.75531	-2.76337e-06
-0.75287	-9.40552e-07	-0.75287	-1.32874e-06	-0.75287	-1.65314e-06	-0.75287	-1.94244e-06	-0.75287	-2.75116e-06
-0.75043	-9.34753e-07	-0.75043	-1.32263e-06	-0.75043	-1.64673e-06	-0.75043	-1.93451e-06	-0.75043	-2.73865e-06
-0.74799	-9.30786e-07	-0.74799	-1.31531e-06	-0.74799	-1.63849e-06	-0.74799	-1.92627e-06	-0.74799	-2.72675e-06
-0.74554	-9.24988e-07	-0.74554	-1.31012e-06	-0.74554	-1.63177e-06	-0.74554	-1.91833e-06	-0.74554	-2.71454e-06
-0.7431	-9.21021e-07	-0.7431	-1.30463e-06	-0.7431	-1.62384e-06	-0.7431	-1.90979e-06	-0.7431	-2.70294e-06
-0.74066	-9.16138e-07	-0.74066	-1.29761e-06	-0.74066	-1.61713e-06	-0.74066	-1.90125e-06	-0.74066	-2.68951e-06
-0.73822	-9.10339e-07	-0.73822	-1.29089e-06	-0.73822	-1.60919e-06	-0.73822	-1.89362e-06	-0.73822	-2.67822e-06
-0.73578	-9.06067e-07	-0.73578	-1.28387e-06	-0.73578	-1.60217e-06	-0.73578	-1.88507e-06	-0.73578	-2.66571e-06
-0.73334	-9.00574e-07	-0.73334	-1.27838e-06	-0.73334	-1.59515e-06	-0.73334	-1.87592e-06	-0.73334	-2.65442e-06
-0.7309	-8.95081e-07	-0.7309	-1.27197e-06	-0.7309	-1.58722e-06	-0.7309	-1.86737e-06	-0.7309	-2.64099e-06
-0.72845	-8.90808e-07	-0.72845	-1.26526e-06	-0.72845	-1.57959e-06	-0.72845	-1.85974e-06	-0.72845	-2.63e-06
-0.72601	-8.8623e-07	-0.72601	-1.25793e-06	-0.72601	-1.57196e-06	-0.72601	-1.8512e-06	-0.72601	-2.61719e-06
-0.72357	-8.81348e-07	-0.72357	-1.25275e-06	-0.72357	-1.56433e-06	-0.72357	-1.84387e-06	-0.72357	-2.60529e-06
-0.72113	-8.75854e-07	-0.72113	-1.24634e-06	-0.72113	-1.55609e-06	-0.72113	-1.83563e-06	-0.72113	-2.59216e-06
-0.71869	-8.71887e-07	-0.71869	-1.24023e-06	-0.71869	-1.54877e-06	-0.71869	-1.82617e-06	-0.71869	-2.58087e-06
-0.71625	-8.66394e-07	-0.71625	-1.23383e-06	-0.71625	-1.54144e-06	-0.71625	-1.81824e-06	-0.71625	-2.56927e-06
-0.71381	-8.63037e-07	-0.71381	-1.22772e-06	-0.71381	-1.53442e-06	-0.71381	-1.80908e-06	-0.71381	-2.55676e-06
-0.71136	-8.57849e-07	-0.71136	-1.2207e-06	-0.71136	-1.52435e-06	-0.71136	-1.80054e-06	-0.71136	-2.54272e-06
-0.70892	-8.53882e-07	-0.70892	-1.21429e-06	-0.70892	-1.51825e-06	-0.70892	-1.7926e-06	-0.70892	-2.53174e-06
-0.70648	-8.47778e-07	-0.70648	-1.20789e-06	-0.70648	-1.51031e-06	-0.70648	-1.78436e-06	-0.70648	-2.51678e-06
-0.70404	-8.43506e-07	-0.70404	-1.20117e-06	-0.70404	-1.5036e-06	-0.70404	-1.77521e-06	-0.70404	-2.50671e-06
-0.7016	-8.38623e-07	-0.7016	-1.19537e-06	-0.7016	-1.49597e-06	-0.7016	-1.76727e-06	-0.7016	-2.49237e-06
-0.69916	-8.3374e-07	-0.69916	-1.18927e-06	-0.69916	-1.48804e-06	-0.69916	-1.75781e-06	-0.69916	-2.48138e-06
-0.69672	-8.28857e-07	-0.69672	-1.18195e-06	-0.69672	-1.4801e-06	-0.69672	-1.74957e-06	-0.69672	-2.46826e-06
-0.69427	-8.2428e-07	-0.69427	-1.17554e-06	-0.69427	-1.47217e-06	-0.69427	-1.74103e-06	-0.69427	-2.45697e-06
-0.69183	-8.19092e-07	-0.69183	-1.16943e-06	-0.69183	-1.46454e-06	-0.69183	-1.73126e-06	-0.69183	-2.44324e-06
-0.68939	-8.14514e-07	-0.68939	-1.16333e-06	-0.68939	-1.45599e-06	-0.68939	-1.72394e-06	-0.68939	-2.43134e-06
-0.68695	-8.09326e-07	-0.68695	-1.15631e-06	-0.68695	-1.44745e-06	-0.68695	-1.71387e-06	-0.68695	-2.41791e-06
-0.68451	-8.05359e-07	-0.68451	-1.1496e-06	-0.68451	-1.44073e-06	-0.68451	-1.70532e-06	-0.68451	-2.4054e-06
-0.68207	-8.00171e-07	-0.68207	-1.14258e-06	-0.68207	-1.4325e-06	-0.68207	-1.69678e-06	-0.68207	-2.39288e-06
-0.67963	-7.95593e-07	-0.67963	-1.13678e-06	-0.67963	-1.42487e-06	-0.67963	-1.68732e-06	-0.67963	-2.38037e-06
-0.67719	-7.91016e-07	-0.67719	-1.12976e-06	-0.67719	-1.41632e-06	-0.67719	-1.67908e-06	-0.67719	-2.36786e-06
-0.67474	-7.85522e-07	-0.67474	-1.12366e-06	-0.67474	-1.40839e-06	-0.67474	-1.66992e-06	-0.67474	-2.35413e-06
-0.6723	-7.8125e-07	-0.6723	-1.11633e-06	-0.6723	-1.40076e-06	-0.6723	-1.66016e-06	-0.6723	-2.34161e-06
-0.66986	-7.75757e-07	-0.66986	-1.11053e-06	-0.66986	-1.39313e-06	-0.66986	-1.65131e-06	-0.66986	-2.32849e-06
-0.66742	-7.7179e-07	-0.66742	-1.10474e-06	-0.66742	-1.38458e-06	-0.66742	-1.64368e-06	-0.66742	-2.31506e-06
-0.66498	-7.66602e-07	-0.66498	-1.09741e-06	-0.66498	-1.37665e-06	-0.66498	-1.63422e-06	-0.66498	-2.30164e-06
-0.66254	-7.61414e-07	-0.66254	-1.09039e-06	-0.66254	-1.36902e-06	-0.66254	-1.62476e-06	-0.66254	-2.28943e-06
-0.6601	-7.56531e-07	-0.6601	-1.08429e-06	-0.6601	-1.36078e-06	-0.6601	-1.61499e-06	-0.6601	-2.27692e-06
-0.65765	-7.51953e-07	-0.65765	-1.07758e-06	-0.65765	-1.35254e-06	-0.65765	-1.60614e-06	-0.65765	-2.26288e-06
-0.65521	-7.4707e-07	-0.65521	-1.07086e-06	-0.65521	-1.34369e-06	-0.65521	-1.59698e-06	-0.65521	-2.24976e-06
-0.65277	-7.42188e-07	-0.65277	-1.06323e-06	-0.65277	-1.33545e-06	-0.65277	-1.58813e-06	-0.65277	-2.23602e-06
-0.65033	-7.37305e-07	-0.65033	-1.05713e-06	-0.65033	-1.32813e-06	-0.65033	-1.57898e-06	-0.65033	-2.22351e-06
-0.64789	-7.32422e-07	-0.64789	-1.0495e-06	-0.64789	-1.31927e-06	-0.64789	-1.56952e-06	-0.64789	-2.20947e-06
-0.64545	-7.26929e-07	-0.64545	-1.04401e-06	-0.64545	-1.31165e-06	-0.64545	-1.56097e-06	-0.64545	-2.19604e-06
-0.64301	-7.22351e-07	-0.64301	-1.03607e-06	-0.64301	-1.30371e-06	-0.64301	-1.55029e-06	-0.64301	-2.18201e-06
-0.64056	-7.18384e-07	-0.64056	-1.03088e-06	-0.64056	-1.29547e-06	-0.64056	-1.54205e-06	-0.64056	-2.16919e-06
-0.63812	-7.12891e-07	-0.63812	-1.02325e-06	-0.63812	-1.28693e-06	-0.63812	-1.53229e-06	-0.63812	-2.15668e-06
-0.63568	-7.08313e-07	-0.63568	-1.01624e-06	-0.63568	-1.27899e-06	-0.63568	-1.52252e-06	-0.63568	-2.14325e-06
-0.63324	-7.02209e-07	-0.63324	-1.00922e-06	-0.63324	-1.27045e-06	-0.63324	-1.51215e-06	-0.63324	-2.12799e-06
-0.6308	-6.97632e-07	-0.6308	-1.00372e-06	-0.6308	-1.2619e-06	-0.6308	-1.50391e-06	-0.6308	-2.11517e-06
-0.62836	-6.93054e-07	-0.62836	-9.95789e-07	-0.62836	-1.25305e-06	-0.62836	-1.49323e-06	-0.62836	-2.10114e-06
-0.62592	-6.87866e-07	-0.62592	-9.90295e-07	-0.62592	-1.24573e-06	-0.62592	-1.48468e-06	-0.62592	-2.08923e-06
-0.62347	-6.83289e-07	-0.62347	-9.82666e-07	-0.62347	-1.23749e-06	-0.62347	-1.47522e-06	-0.62347	-2.0755e-06
-0.62103	-6.78406e-07	-0.62103	-9.76563e-07	-0.62103	-1.22864e-06	-0.62103	-1.46576e-06	-0.62103	-2.06207e-06
-0.61859	-6.73218e-07	-0.61859	-9.68933e-07	-0.61859	-1.22101e-06	-0.61859	-1.4566e-06	-0.61859	-2.04865e-06
-0.61615	-6.6864e-07	-0.61615	-9.62219e-07	-0.61615	-1.21185e-06	-0.61615	-1.44684e-06	-0.61615	-2.03522e-06
-0.61371	-6.63147e-07	-0.61371	-9.55811e-07	-0.61371	-1.20361e-06	-0.61371	-1.43585e-06	-0.61371	-2.02057e-06
-0.61127	-6.58875e-07	-0.61127	-9.48486e-07	-0.61127	-1.19476e-06	-0.61127	-1.42761e-06	-0.61127	-2.00836e-06
-0.60883	-6.53381e-07	-0.60883	-9.40857e-07	-0.60883	-1.18713e-06	-0.60883	-1.41663e-06	-0.60883	-1.99371e-06
-0.60638	-6.49109e-07	-0.60638	-9.35059e-07	-0.60638	-1.17767e-06	-0.60638	-1.40686e-06	-0.60638	-1.97998e-06
-0.60394	-6.44836e-07	-0.60394	-9.27429e-07	-0.60394	-1.17004e-06	-0.60394	-1.39771e-06	-0.60394	-1.96655e-06
-0.6015	-6.39954e-07	-0.6015	-9.20715e-07	-0.6015	-1.16119e-06	-0.6015	-1.38824e-06	-0.6015	-1.9519e-06
-0.59906	-6.35071e-07	-0.59906	-9.13391e-07	-0.59906	-1.15326e-06	-0.59906	-1.37817e-06	-0.59906	-1.93939e-06
-0.59662	-6.29578e-07	-0.59662	-9.06372e-07	-0.59662	-1.1438e-06	-0.59662	-1.36902e-06	-0.59662	-1.92505e-06
-0.59418	-6.25305e-07	-0.59418	-9.00269e-07	-0.59418	-1.13586e-06	-0.59418	-1.35773e-06	-0.59418	-1.91132e-06
-0.59174	-6.19812e-07	-0.59174	-8.92029e-07	-0.59174	-1.12732e-06	-0.59174	-1.34857e-06	-0.59174	-1.8985e-06
-0.58929	-6.14624e-07	-0.58929	-8.85315e-07	-0.58929	-1.11877e-06	-0.58929	-1.33911e-06	-0.58929	-1.88446e-06
-0.58685	-6.10962e-07	-0.58685	-8.79517e-07	-0.58685	-1.10931e-06	-0.58685	-1.32843e-06	-0.58685	-1.86981e-06
-0.58441	-6.05469e-07	-0.58441	-8.72498e-07	-0.58441	-1.10138e-06	-0.58441	-1.31897e-06	-0.58441	-1.85669e-06
-0.58197	-5.9967e-07	-0.58197	-8.65479e-07	-0.58197	-1.09253e-06	-0.58197	-1.30951e-06	-0.58197	-1.84326e-06
-0.57953	-5.96313e-07	-0.57953	-8.58154e-07	-0.57953	-1.08368e-06	-0.57953	-1.29883e-06	-0.57953	-1.82922e-06
-0.57709	-5.9082e-07	-0.57709	-8.5144e-07	-0.57709	-1.07574e-06	-0.57709	-1.28967e-06	-0.57709	-1.8158e-06
-0.57465	-5.85938e-07	-0.57465	-8.43811e-07	-0.57465	-1.06659e-06	-0.57465	-1.27899e-06	-0.57465	-1.80145e-06
-0.5722	-5.8075e-07	-0.5722	-8.38013e-07	-0.5722	-1.05804e-06	-0.5722	-1.26862e-06	-0.5722	-1.78802e-06
-0.56976	-5.75562e-07	-0.56976	-8.30383e-07	-0.56976	-1.0495e-06	-0.56976	-1.25916e-06	-0.56976	-1.77368e-06
-0.56732	-5.70679e-07	-0.56732	-8.22754e-07	-0.56732	-1.04095e-06	-0.56732	-1.24939e-06	-0.56732	-1.75964e-06
-0.56488	-5.6427e-07	-0.56488	-8.1604e-07	-0.56488	-1.03271e-06	-0.56488	-1.23932e-06	-0.56488	-1.74652e-06
-0.56244	-5.59692e-07	-0.56244	-8.09631e-07	-0.56244	-1.02417e-06	-0.56244	-1.22803e-06	-0.56244	-1.73218e-06
-0.56	-5.55115e-07	-0.56	-8.02002e-07	-0.56	-1.01501e-06	-0.56	-1.21948e-06	-0.56	-1.71906e-06
-0.55756	-5.51147e-07	-0.55756	-7.94678e-07	-0.55756	-1.00708e-06	-0.55756	-1.20911e-06	-0.55756	-1.70532e-06
-0.55511	-5.45349e-07	-0.55511	-7.87964e-07	-0.55511	-9.9823e-07	-0.55511	-1.19873e-06	-0.55511	-1.69037e-06
-0.55267	-5.41077e-07	-0.55267	-7.81555e-07	-0.55267	-9.89075e-07	-0.55267	-1.18896e-06	-0.55267	-1.67908e-06
-0.55023	-5.35278e-07	-0.55023	-7.73926e-07	-0.55023	-9.80835e-07	-0.55023	-1.17828e-06	-0.55023	-1.66321e-06
-0.54779	-5.29785e-07	-0.54779	-7.67822e-07	-0.54779	-9.71985e-07	-0.54779	-1.16974e-06	-0.54779	-1.651e-06
-0.54535	-5.24292e-07	-0.54535	-7.59888e-07	-0.54535	-9.6344e-07	-0.54535	-1.15906e-06	-0.54535	-1.63727e-06
-0.54291	-5.2002e-07	-0.54291	-7.54089e-07	-0.54291	-9.552e-07	-0.54291	-1.1496e-06	-0.54291	-1.62354e-06
-0.54047	-5.15137e-07	-0.54047	-7.45544e-07	-0.54047	-9.4574e-07	-0.54047	-1.13983e-06	-0.54047	-1.6098e-06
-0.53802	-5.08728e-07	-0.53802	-7.39441e-07	-0.53802	-9.37195e-07	-0.53802	-1.12946e-06	-0.53802	-1.59576e-06
-0.53558	-5.03235e-07	-0.53558	-7.31506e-07	-0.53558	-9.2926e-07	-0.53558	-1.11877e-06	-0.53558	-1.58173e-06
-0.53314	-5.00488e-07	-0.53314	-7.25708e-07	-0.53314	-9.2041e-07	-0.53314	-1.1087e-06	-0.53314	-1.56952e-06
-0.5307	-4.94995e-07	-0.5307	-7.17468e-07	-0.5307	-9.1095e-07	-0.5307	-1.09833e-06	-0.5307	-1.55426e-06
-0.52826	-4.90112e-07	-0.52826	-7.11365e-07	-0.52826	-9.0332e-07	-0.52826	-1.08948e-06	-0.52826	-1.54175e-06
-0.52582	-4.84619e-07	-0.52582	-7.0343e-07	-0.52582	-8.94165e-07	-0.52582	-1.07849e-06	-0.52582	-1.5274e-06
-0.52338	-4.79736e-07	-0.52338	-6.97021e-07	-0.52338	-8.8562e-07	-0.52338	-1.06903e-06	-0.52338	-1.51367e-06
-0.52094	-4.75159e-07	-0.52094	-6.90308e-07	-0.52094	-8.77075e-07	-0.52094	-1.05927e-06	-0.52094	-1.50055e-06
-0.51849	-4.68811e-07	-0.51849	-6.83289e-07	-0.51849	-8.6853e-07	-0.51849	-1.04889e-06	-0.51849	-1.48773e-06
-0.51605	-4.63165e-07	-0.51605	-6.75964e-07	-0.51605	-8.60291e-07	-0.51605	-1.03912e-06	-0.51605	-1.47308e-06
-0.51361	-4.58771e-07	-0.51361	-6.69861e-07	-0.51361	-8.52356e-07	-0.51361	-1.02936e-06	-0.51361	-1.45966e-06
-0.51117	-4.53339e-07	-0.51117	-6.62231e-07	-0.51117	-8.41675e-07	-0.51117	-1.01959e-06	-0.51117	-1.44592e-06
-0.50873	-4.48975e-07	-0.50873	-6.55518e-07	-0.50873	-8.34961e-07	-0.50873	-1.00891e-06	-0.50873	-1.4328e-06
-0.50629	-4.43512e-07	-0.50629	-6.47888e-07	-0.50629	-8.25806e-07	-0.50629	-9.99146e-07	-0.50629	-1.41998e-06
-0.50385	-4.38904e-07	-0.50385	-6.41479e-07	-0.50385	-8.16956e-07	-0.50385	-9.89075e-07	-0.50385	-1.40839e-06
-0.5014	-4.33594e-07	-0.5014	-6.3446e-07	-0.5014	-8.08411e-07	-0.5014	-9.79309e-07	-0.5014	-1.39374e-06
-0.49896	-4.28284e-07	-0.49896	-6.27136e-07	-0.49896	-8.00171e-07	-0.49896	-9.69238e-07	-0.49896	-1.38e-06
-0.49652	-4.23126e-07	-0.49652	-6.20117e-07	-0.49652	-7.91931e-07	-0.49652	-9.58862e-07	-0.49652	-1.36566e-06
-0.49408	-4.18335e-07	-0.49408	-6.12793e-07	-0.49408	-7.83386e-07	-0.49408	-9.49402e-07	-0.49408	-1.35437e-06
-0.49164	-4.12872e-07	-0.49164	-6.06079e-07	-0.49164	-7.73926e-07	-0.49164	-9.39331e-07	-0.49164	-1.34003e-06
-0.4892	-4.08417e-07	-0.4892	-6.00281e-07	-0.4892	-7.66602e-07	-0.4892	-9.29871e-07	-0.4892	-1.32751e-06
-0.48676	-4.0332e-07	-0.48676	-5.92346e-07	-0.48676	-7.58362e-07	-0.48676	-9.198e-07	-0.48676	-1.31378e-06
-0.48431	-3.98407e-07	-0.48431	-5.86243e-07	-0.48431	-7.49512e-07	-0.48431	-9.09729e-07	-0.48431	-1.30005e-06
-0.48187	-3.94531e-07	-0.48187	-5.78918e-07	-0.48187	-7.39746e-07	-0.48187	-9.00269e-07	-0.48187	-1.28815e-06
-0.47943	-3.89404e-07	-0.47943	-5.70984e-07	-0.47943	-7.32422e-07	-0.47943	-8.90808e-07	-0.47943	-1.27533e-06
-0.47699	-3.84399e-07	-0.47699	-5.6488e-07	-0.47699	-7.23877e-07	-0.47699	-8.80737e-07	-0.47699	-1.2616e-06
-0.47455	-3.80127e-07	-0.47455	-5.58777e-07	-0.47455	-7.16248e-07	-0.47455	-8.71277e-07	-0.47455	-1.25e-06
-0.47211	-3.74908e-07	-0.47211	-5.51147e-07	-0.47211	-7.07703e-07	-0.47211	-8.60901e-07	-0.47211	-1.23627e-06
-0.46967	-3.70331e-07	-0.46967	-5.44739e-07	-0.46967	-6.99158e-07	-0.46967	-8.52356e-07	-0.46967	-1.22467e-06
-0.46722	-3.65234e-07	-0.46722	-5.3772e-07	-0.46722	-6.91528e-07	-0.46722	-8.41064e-07	-0.46722	-1.21033e-06
-0.46478	-3.61237e-07	-0.46478	-5.31311e-07	-0.46478	-6.82068e-07	-0.46478	-8.31299e-07	-0.46478	-1.19843e-06
-0.46234	-3.55743e-07	-0.46234	-5.24902e-07	-0.46234	-6.74438e-07	-0.46234	-8.22449e-07	-0.46234	-1.1853e-06
-0.4599	-3.50861e-07	-0.4599	-5.17273e-07	-0.4599	-6.66504e-07	-0.4599	-8.12378e-07	-0.4599	-1.17279e-06
-0.45746	-3.46008e-07	-0.45746	-5.10864e-07	-0.45746	-6.57654e-07	-0.45746	-8.02612e-07	-0.45746	-1.15906e-06
-0.45502	-3.41431e-07	-0.45502	-5.0415e-07	-0.45502	-6.50024e-07	-0.45502	-7.93152e-07	-0.45502	-1.14655e-06
-0.45258	-3.36517e-07	-0.45258	-4.97742e-07	-0.45258	-6.41479e-07	-0.45258	-7.83997e-07	-0.45258	-1.13373e-06
-0.45013	-3.31909e-07	-0.45013	-4.91333e-07	-0.45013	-6.3324e-07	-0.45013	-7.74841e-07	-0.45013	-1.12244e-06
-0.44769	-3.26569e-07	-0.44769	-4.83398e-07	-0.44769	-6.25e-07	-0.44769	-7.65686e-07	-0.44769	-1.10992e-06
-0.44525	-3.22174e-07	-0.44525	-4.776e-07	-0.44525	-6.17981e-07	-0.44525	-7.55615e-07	-0.44525	-1.0965e-06
-0.44281	-3.17627e-07	-0.44281	-4.70886e-07	-0.44281	-6.09131e-07	-0.44281	-7.45544e-07	-0.44281	-1.08368e-06
-0.44037	-3.12836e-07	-0.44037	-4.63348e-07	-0.44037	-6.00586e-07	-0.44037	-7.37305e-07	-0.44037	-1.07208e-06
-0.43793	-3.08014e-07	-0.43793	-4.5697e-07	-0.43793	-5.92957e-07	-0.43793	-7.26929e-07	-0.43793	-1.05896e-06
-0.43549	-3.0365e-07	-0.43549	-4.5047e-07	-0.43549	-5.85022e-07	-0.43549	-7.18384e-07	-0.43549	-1.04645e-06
-0.43304	-2.98737e-07	-0.43304	-4.43573e-07	-0.43304	-5.76782e-07	-0.43304	-7.08313e-07	-0.43304	-1.03424e-06
-0.4306	-2.94373e-07	-0.4306	-4.37683e-07	-0.4306	-5.68237e-07	-0.4306	-6.99768e-07	-0.4306	-1.02264e-06
-0.42816	-2.89429e-07	-0.42816	-4.31122e-07	-0.42816	-5.60303e-07	-0.42816	-6.90002e-07	-0.42816	-1.00922e-06
-0.42572	-2.84729e-07	-0.42572	-4.24988e-07	-0.42572	-5.53284e-07	-0.42572	-6.81152e-07	-0.42572	-9.97009e-07
-0.42328	-2.80304e-07	-0.42328	-4.18518e-07	-0.42328	-5.45349e-07	-0.42328	-6.71692e-07	-0.42328	-9.83582e-07
-0.42084	-2.75269e-07	-0.42084	-4.12231e-07	-0.42084	-5.36804e-07	-0.42084	-6.62537e-07	-0.42084	-9.73206e-07
-0.4184	-2.70416e-07	-0.4184	-4.05762e-07	-0.4184	-5.29175e-07	-0.4184	-6.53992e-07	-0.4184	-9.58862e-07
-0.41595	-2.6651e-07	-0.41595	-3.99445e-07	-0.41595	-5.21545e-07	-0.41595	-6.43921e-07	-0.41595	-9.47266e-07
-0.41351	-2.6178e-07	-0.41351	-3.93005e-07	-0.41351	-5.13916e-07	-0.41351	-6.35681e-07	-0.41351	-9.34753e-07
-0.41107	-2.57507e-07	-0.41107	-3.87268e-07	-0.41107	-5.06592e-07	-0.41107	-6.26831e-07	-0.41107	-9.21631e-07
-0.40863	-2.53052e-07	-0.40863	-3.80829e-07	-0.40863	-4.98352e-07	-0.40863	-6.16455e-07	-0.40863	-9.09729e-07
-0.40619	-2.49054e-07	-0.40619	-3.74176e-07	-0.40619	-4.90723e-07	-0.40619	-6.08215e-07	-0.40619	-8.98438e-07
-0.40375	-2.44904e-07	-0.40375	-3.685e-07	-0.40375	-4.84009e-07	-0.40375	-5.9967e-07	-0.40375	-8.85925e-07
-0.40131	-2.40265e-07	-0.40131	-3.62488e-07	-0.40131	-4.76685e-07	-0.40131	-5.91125e-07	-0.40131	-8.73413e-07
-0.39886	-2.35992e-07	-0.39886	-3.56354e-07	-0.39886	-4.6814e-07	-0.39886	-5.82275e-07	-0.39886	-8.62122e-07
-0.39642	-2.31934e-07	-0.39642	-3.50403e-07	-0.39642	-4.60907e-07	-0.39642	-5.73425e-07	-0.39642	-8.50525e-07
-0.39398	-2.276e-07	-0.39398	-3.43872e-07	-0.39398	-4.53247e-07	-0.39398	-5.6427e-07	-0.39398	-8.37708e-07
-0.39154	-2.23846e-07	-0.39154	-3.3844e-07	-0.39154	-4.46442e-07	-0.39154	-5.56946e-07	-0.39154	-8.26416e-07
-0.3891	-2.19238e-07	-0.3891	-3.32703e-07	-0.3891	-4.38416e-07	-0.3891	-5.4718e-07	-0.3891	-8.14209e-07
-0.38666	-2.15179e-07	-0.38666	-3.26691e-07	-0.38666	-4.31641e-07	-0.38666	-5.39551e-07	-0.38666	-8.02917e-07
-0.38422	-2.10968e-07	-0.38422	-3.21228e-07	-0.38422	-4.24408e-07	-0.38422	-5.31616e-07	-0.38422	-7.92236e-07
-0.38177	-2.07733e-07	-0.38177	-3.15308e-07	-0.38177	-4.16687e-07	-0.38177	-5.23071e-07	-0.38177	-7.79724e-07
-0.37933	-2.02911e-07	-0.37933	-3.09784e-07	-0.37933	-4.09393e-07	-0.37933	-5.14832e-07	-0.37933	-7.68738e-07
-0.37689	-1.9989e-07	-0.37689	-3.0423e-07	-0.37689	-4.02832e-07	-0.37689	-5.06287e-07	-0.37689	-7.57751e-07
-0.37445	-1.95343e-07	-0.37445	-2.98431e-07	-0.37445	-3.95477e-07	-0.37445	-4.98657e-07	-0.37445	-7.45239e-07
-0.37201	-1.91833e-07	-0.37201	-2.92816e-07	-0.37201	-3.89008e-07	-0.37201	-4.90112e-07	-0.37201	-7.35168e-07
-0.36957	-1.87958e-07	-0.36957	-2.87109e-07	-0.36957	-3.8208e-07	-0.36957	-4.81567e-07	-0.36957	-7.22351e-07
-0.36713	-1.83929e-07	-0.36713	-2.81586e-07	-0.36713	-3.75427e-07	-0.36713	-4.72107e-07	-0.36713	-7.1228e-07
-0.36469	-1.80481e-07	-0.36469	-2.76489e-07	-0.36469	-3.68591e-07	-0.36469	-4.65698e-07	-0.36469	-7.01294e-07
-0.36224	-1.76666e-07	-0.36224	-2.70844e-07	-0.36224	-3.61542e-07	-0.36224	-4.56482e-07	-0.36224	-6.90002e-07
-0.3598	-1.72729e-07	-0.3598	-2.65137e-07	-0.3598	-3.55011e-07	-0.3598	-4.4809e-07	-0.3598	-6.78101e-07
-0.35736	-1.68823e-07	-0.35736	-2.60773e-07	-0.35736	-3.48816e-07	-0.35736	-4.40552e-07	-0.35736	-6.69861e-07
-0.35492	-1.64948e-07	-0.35492	-2.54669e-07	-0.35492	-3.42163e-07	-0.35492	-4.33044e-07	-0.35492	-6.57349e-07
-0.35248	-1.61438e-07	-0.35248	-2.49786e-07	-0.35248	-3.35938e-07	-0.35248	-4.25415e-07	-0.35248	-6.47888e-07
-0.35004	-1.57623e-07	-0.35004	-2.44873e-07	-0.35004	-3.29224e-07	-0.35004	-4.17969e-07	-0.35004	-6.36292e-07
-0.3476	-1.54022e-07	-0.3476	-2.39655e-07	-0.3476	-3.22754e-07	-0.3476	-4.10095e-07	-0.3476	-6.27136e-07
-0.34515	-1.50452e-07	-0.34515	-2.3468e-07	-0.34515	-3.16711e-07	-0.34515	-4.03473e-07	-0.34515	-6.1554e-07
-0.34271	-1.46729e-07	-0.34271	-2.29523e-07	-0.34271	-3.10547e-07	-0.34271	-3.95691e-07	-0.34271	-6.06384e-07
-0.34027	-1.43158e-07	-0.34027	-2.24518e-07	-0.34027	-3.03772e-07	-0.34027	-3.88336e-07	-0.34027	-5.95703e-07
-0.33783	-1.39587e-07	-0.33783	-2.20032e-07	-0.33783	-2.97638e-07	-0.33783	-3.80798e-07	-0.33783	-5.87158e-07
-0.33539	-1.36078e-07	-0.33539	-2.14325e-07	-0.33539	-2.91412e-07	-0.33539	-3.73566e-07	-0.33539	-5.75562e-07
-0.33295	-1.32568e-07	-0.33295	-2.09564e-07	-0.33295	-2.85583e-07	-0.33295	-3.66547e-07	-0.33295	-5.66406e-07
-0.33051	-1.28784e-07	-0.33051	-2.04834e-07	-0.33051	-2.79663e-07	-0.33051	-3.59314e-07	-0.33051	-5.56946e-07
-0.32806	-1.25458e-07	-0.32806	-2.00317e-07	-0.32806	-2.73651e-07	-0.32806	-3.52448e-07	-0.32806	-5.48401e-07
-0.32562	-1.22192e-07	-0.32562	-1.95587e-07	-0.32562	-2.68005e-07	-0.32562	-3.45398e-07	-0.32562	-5.3833e-07
-0.32318	-1.18774e-07	-0.32318	-1.9101e-07	-0.32318	-2.62177e-07	-0.32318	-3.38989e-07	-0.32318	-5.2948e-07
-0.32074	-1.14807e-07	-0.32074	-1.8631e-07	-0.32074	-2.5647e-07	-0.32074	-3.31604e-07	-0.32074	-5.18494e-07
-0.3183	-1.11938e-07	-0.3183	-1.81671e-07	-0.3183	-2.50763e-07	-0.3183	-3.25043e-07	-0.3183	-5.09949e-07
-0.31586	-1.08093e-07	-0.31586	-1.77887e-07	-0.31586	-2.45056e-07	-0.31586	-3.18268e-07	-0.31586	-5.00793e-07
-0.31342	-1.05103e-07	-0.31342	-1.73309e-07	-0.31342	-2.40021e-07	-0.31342	-3.12103e-07	-0.31342	-4.91333e-07
-0.31097	-1.01593e-07	-0.31097	-1.68793e-07	-0.31097	-2.34009e-07	-0.31097	-3.05237e-07	-0.31097	-4.83093e-07
-0.30853	-9.87854e-08	-0.30853	-1.64856e-07	-0.30853	-2.28851e-07	-0.30853	-2.99072e-07	-0.30853	-4.74243e-07
-0.30609	-9.58862e-08	-0.30609	-1.60309e-07	-0.30609	-2.23694e-07	-0.30609	-2.92633e-07	-0.30609	-4.65393e-07
-0.30365	-9.27124e-08	-0.30365	-1.55853e-07	-0.30365	-2.1817e-07	-0.30365	-2.85919e-07	-0.30365	-4.55933e-07
-0.30121	-8.93555e-08	-0.30121	-1.51398e-07	-0.30121	-2.12799e-07	-0.30121	-2.8006e-07	-0.30121	-4.46533e-07
-0.29877	-8.68225e-08	-0.29877	-1.47644e-07	-0.29877	-2.07733e-07	-0.29877	-2.73865e-07	-0.29877	-4.38141e-07
-0.29633	-8.30078e-08	-0.29633	-1.4328e-07	-0.29633	-2.02118e-07	-0.29633	-2.67853e-07	-0.29633	-4.29626e-07
-0.29388	-8.03223e-08	-0.29388	-1.39374e-07	-0.29388	-1.97601e-07	-0.29388	-2.62085e-07	-0.29388	-4.2157e-07
-0.29144	-7.71484e-08	-0.29144	-1.35162e-07	-0.29144	-1.92535e-07	-0.29144	-2.55402e-07	-0.29144	-4.12506e-07
-0.289	-7.46765e-08	-0.289	-1.31287e-07	-0.289	-1.88141e-07	-0.289	-2.50244e-07	-0.289	-4.04327e-07
-0.28656	-7.13806e-08	-0.28656	-1.27747e-07	-0.28656	-1.83105e-07	-0.28656	-2.44354e-07	-0.28656	-3.96515e-07
-0.28412	-6.83899e-08	-0.28412	-1.2381e-07	-0.28412	-1.78467e-07	-0.28412	-2.38281e-07	-0.28412	-3.88306e-07
-0.28168	-6.57959e-08	-0.28168	-1.20575e-07	-0.28168	-1.73401e-07	-0.28168	-2.32788e-07	-0.28168	-3.79578e-07
-0.27924	-6.33545e-08	-0.27924	-1.16943e-07	-0.27924	-1.69464e-07	-0.27924	-2.27448e-07	-0.27924	-3.72223e-07
-0.27679	-6.00281e-08	-0.27679	-1.12671e-07	-0.27679	-1.64673e-07	-0.27679	-2.21802e-07	-0.27679	-3.6438e-07
-0.27435	-5.74036e-08	-0.27435	-1.091e-07	-0.27435	-1.5976e-07	-0.27435	-2.1637e-07	-0.27435	-3.56262e-07
-0.27191	-5.4718e-08	-0.27191	-1.05164e-07	-0.27191	-1.55182e-07	-0.27191	-2.1106e-07	-0.27191	-3.48602e-07
-0.26947	-5.22156e-08	-0.26947	-1.02203e-07	-0.26947	-1.50574e-07	-0.26947	-2.05811e-07	-0.26947	-3.41034e-07
-0.26703	-4.94385e-08	-0.26703	-9.82361e-08	-0.26703	-1.46332e-07	-0.26703	-2.005e-07	-0.26703	-3.33466e-07
-0.26459	-4.6814e-08	-0.26459	-9.44519e-08	-0.26459	-1.42456e-07	-0.26459	-1.95251e-07	-0.26459	-3.26691e-07
-0.26215	-4.37317e-08	-0.26215	-9.12781e-08	-0.26215	-1.37695e-07	-0.26215	-1.8988e-07	-0.26215	-3.18146e-07
-0.2597	-4.15344e-08	-0.2597	-8.76465e-08	-0.2597	-1.33667e-07	-0.2597	-1.84967e-07	-0.2597	-3.11493e-07
-0.25726	-3.83911e-08	-0.25726	-8.44727e-08	-0.25726	-1.2915e-07	-0.25726	-1.79718e-07	-0.25726	-3.0365e-07
-0.25482	-3.58276e-08	-0.25482	-8.13599e-08	-0.25482	-1.25031e-07	-0.25482	-1.74957e-07	-0.25482	-2.96387e-07
-0.25238	-3.29285e-08	-0.25238	-7.80945e-08	-0.25238	-1.21429e-07	-0.25238	-1.69952e-07	-0.25238	-2.88727e-07
-0.24994	-3.06091e-08	-0.24994	-7.51038e-08	-0.24994	-1.1731e-07	-0.24994	-1.65619e-07	-0.24994	-2.81128e-07
-0.2475	-2.80762e-08	-0.2475	-7.16858e-08	-0.2475	-1.13281e-07	-0.2475	-1.60675e-07	-0.2475	-2.75177e-07
-0.24506	-2.54211e-08	-0.24506	-6.88171e-08	-0.24506	-1.09436e-07	-0.24506	-1.56036e-07	-0.24506	-2.67731e-07
-0.24261	-2.29797e-08	-0.24261	-6.60095e-08	-0.24261	-1.05316e-07	-0.24261	-1.51276e-07	-0.24261	-2.60559e-07
-0.24017	-2.12708e-08	-0.24017	-6.30798e-08	-0.24017	-1.01379e-07	-0.24017	-1.47003e-07	-0.24017	-2.53113e-07
-0.23773	-1.86768e-08	-0.23773	-5.95398e-08	-0.23773	-9.79309e-08	-0.23773	-1.42273e-07	-0.23773	-2.46521e-07
-0.23529	-1.69067e-08	-0.23529	-5.67017e-08	-0.23529	-9.47266e-08	-0.23529	-1.38214e-07	-0.23529	-2.40326e-07
-0.23285	-1.46484e-08	-0.23285	-5.38635e-08	-0.23285	-9.06677e-08	-0.23285	-1.33514e-07	-0.23285	-2.33154e-07
-0.23041	-1.25122e-08	-0.23041	-5.10864e-08	-0.23041	-8.69446e-08	-0.23041	-1.2915e-07	-0.23041	-2.26685e-07
-0.22797	-1.01318e-08	-0.22797	-4.7699e-08	-0.22797	-8.36792e-08	-0.22797	-1.25092e-07	-0.22797	-2.1991e-07
-0.22552	-8.42285e-09	-0.22552	-4.46167e-08	-0.22552	-8.06885e-08	-0.22552	-1.20819e-07	-0.22552	-2.13318e-07
-0.22308	-6.01807e-09	-0.22308	-4.21143e-08	-0.22308	-7.70874e-08	-0.22308	-1.16364e-07	-0.22308	-2.07214e-07
-0.22064	-4.05884e-09	-0.22064	-3.88489e-08	-0.22064	-7.42188e-08	-0.22064	-1.1261e-07	-0.22064	-2.00562e-07
-0.2182	-1.80054e-09	-0.2182	-3.64685e-08	-0.2182	-7.02515e-08	-0.2182	-1.08307e-07	-0.2182	-1.94305e-07
-0.21576	2.47192e-10	-0.21576	-3.36609e-08	-0.21576	-6.75964e-08	-0.21576	-1.04919e-07	-0.21576	-1.88354e-07
-0.21332	2.29797e-09	-0.21332	-3.0365e-08	-0.21332	-6.43311e-08	-0.21332	-1.00372e-07	-0.21332	-1.81366e-07
-0.21088	4.18091e-09	-0.21088	-2.83813e-08	-0.21088	-6.14014e-08	-0.21088	-9.66492e-08	-0.21088	-1.75446e-07
-0.20844	6.53076e-09	-0.20844	-2.56653e-08	-0.20844	-5.83801e-08	-0.20844	-9.2926e-08	-0.20844	-1.70044e-07
-0.20599	8.05664e-09	-0.20599	-2.28882e-08	-0.20599	-5.54504e-08	-0.20599	-8.91418e-08	-0.20599	-1.6391e-07
-0.20355	1.05286e-08	-0.20355	-2.10266e-08	-0.20355	-5.19409e-08	-0.20355	-8.55713e-08	-0.20355	-1.57806e-07
-0.20111	1.19629e-08	-0.20111	-1.8219e-08	-0.20111	-4.92249e-08	-0.20111	-8.23364e-08	-0.20111	-1.52313e-07
-0.19867	1.34277e-08	-0.19867	-1.55945e-08	-0.19867	-4.599e-08	-0.19867	-7.83386e-08	-0.19867	-1.46118e-07
-0.19623	1.55945e-08	-0.19623	-1.37634e-08	-0.19623	-4.29993e-08	-0.19623	-7.50427e-08	-0.19623	-1.40472e-07
-0.19379	1.76392e-08	-0.19379	-1.09558e-08	-0.19379	-4.00696e-08	-0.19379	-7.17773e-08	-0.19379	-1.34064e-07
-0.19135	1.91345e-08	-0.19135	-9.00269e-09	-0.19135	-3.62244e-08	-0.19135	-6.7749e-08	-0.19135	-1.28296e-07
-0.1889	2.11792e-08	-0.1889	-7.01904e-09	-0.1889	-3.39966e-08	-0.1889	-6.47278e-08	-0.1889	-1.22467e-07
-0.18646	2.24304e-08	-0.18646	-4.51965e-09	-0.18646	-3.07312e-08	-0.18646	-6.12183e-08	-0.18646	-1.16577e-07
-0.18402	2.49329e-08	-0.18402	-2.0752e-09	-0.18402	-2.80762e-08	-0.18402	-5.77698e-08	-0.18402	-1.11115e-07
-0.18158	2.63367e-08	-0.18158	-5.79834e-10	-0.18158	-2.54211e-08	-0.18158	-5.53589e-08	-0.18158	-1.05682e-07
-0.17914	2.81372e-08	-0.17914	1.89209e-09	-0.17914	-2.27051e-08	-0.17914	-5.13306e-08	-0.17914	-1.00098e-07
-0.1767	2.96021e-08	-0.1767	4.03137e-09	-0.1767	-2.04163e-08	-0.1767	-4.81873e-08	-0.1767	-9.50012e-08
-0.17426	3.15247e-08	-0.17426	6.5918e-09	-0.17426	-1.72119e-08	-0.17426	-4.44336e-08	-0.17426	-8.9447e-08
-0.17181	3.25623e-08	-0.17181	8.30078e-09	-0.17181	-1.52283e-08	-0.17181	-4.16565e-08	-0.17181	-8.46252e-08
-0.16937	3.479e-08	-0.16937	1.08032e-08	-0.16937	-1.23291e-08	-0.16937	-3.83911e-08	-0.16937	-7.96509e-08
-0.16693	3.71704e-08	-0.16693	1.19629e-08	-0.16693	-9.70459e-09	-0.16693	-3.54919e-08	-0.16693	-7.50122e-08
-0.16449	3.95508e-08	-0.16449	1.42212e-08	-0.16449	-6.95801e-09	-0.16449	-3.20129e-08	-0.16449	-6.99158e-08
-0.16205	4.08936e-08	-0.16205	1.63574e-08	-0.16205	-4.94385e-09	-0.16205	-2.95105e-08	-0.16205	-6.54297e-08
-0.15961	4.21753e-08	-0.15961	1.83105e-08	-0.15961	-2.47192e-09	-0.15961	-2.62146e-08	-0.15961	-6.073e-08
-0.15717	4.41589e-08	-0.15717	1.9989e-08	-0.15717	-3.96729e-10	-0.15717	-2.38342e-08	-0.15717	-5.58472e-08
-0.15472	4.60205e-08	-0.15472	2.18506e-08	-0.15472	2.67639e-09	-0.15472	-2.0813e-08	-0.15472	-5.09338e-08
-0.15228	4.76379e-08	-0.15228	2.3407e-08	-0.15228	4.84009e-09	-0.15228	-1.79749e-08	-0.15228	-4.66003e-08
-0.14984	4.93164e-08	-0.14984	2.53601e-08	-0.14984	7.32422e-09	-0.14984	-1.55334e-08	-0.14984	-4.11987e-08
-0.1474	5.08118e-08	-0.1474	2.74963e-08	-0.1474	9.58252e-09	-0.1474	-1.30615e-08	-0.1474	-3.71094e-08
-0.14496	5.26428e-08	-0.14496	2.93884e-08	-0.14496	1.18408e-08	-0.14496	-9.97925e-09	-0.14496	-3.25012e-08
-0.14252	5.39246e-08	-0.14252	3.10059e-08	-0.14252	1.38855e-08	-0.14252	-7.84302e-09	-0.14252	-2.84119e-08
-0.14008	5.54199e-08	-0.14008	3.31726e-08	-0.14008	1.58386e-08	-0.14008	-5.00488e-09	-0.14008	-2.35596e-08
-0.13763	5.63049e-08	-0.13763	3.46985e-08	-0.13763	1.80054e-08	-0.13763	-2.92969e-09	-0.13763	-1.96228e-08
-0.13519	5.83496e-08	-0.13519	3.68347e-08	-0.13519	2.07214e-08	-0.13519	3.05176e-10	-0.13519	-1.55945e-08
-0.13275	5.9845e-08	-0.13275	3.79639e-08	-0.13275	2.27661e-08	-0.13275	2.50244e-09	-0.13275	-1.12915e-08
-0.13031	6.14929e-08	-0.13031	4.03137e-08	-0.13031	2.49329e-08	-0.13031	5.0354e-09	-0.13031	-7.1106e-09
-0.12787	6.29272e-08	-0.12787	4.15649e-08	-0.12787	2.67029e-08	-0.12787	7.56836e-09	-0.12787	-3.479e-09
-0.12543	6.38428e-08	-0.12543	4.37927e-08	-0.12543	2.9541e-08	-0.12543	1.03149e-08	-0.12543	7.01904e-10
-0.12299	6.52161e-08	-0.12299	4.57458e-08	-0.12299	3.125e-08	-0.12299	1.27258e-08	-0.12299	4.60815e-09
-0.12054	6.65588e-08	-0.12054	4.79431e-08	-0.12054	3.36914e-08	-0.12054	1.48621e-08	-0.12054	9.33838e-09
-0.1181	6.80542e-08	-0.1181	4.88281e-08	-0.1181	3.54004e-08	-0.1181	1.71204e-08	-0.1181	1.27563e-08
-0.11566	6.93054e-08	-0.11566	5.08423e-08	-0.11566	3.75366e-08	-0.11566	1.96838e-08	-0.11566	1.7395e-08
-0.11322	7.05566e-08	-0.11322	5.20935e-08	-0.11322	3.97339e-08	-0.11322	2.19421e-08	-0.11322	2.10876e-08
-0.11078	7.19299e-08	-0.11078	5.3833e-08	-0.11078	4.14429e-08	-0.11078	2.40784e-08	-0.11078	2.50244e-08
-0.10834	7.31506e-08	-0.10834	5.59692e-08	-0.10834	4.40674e-08	-0.10834	2.62756e-08	-0.10834	3.0304e-08
-0.1059	7.42798e-08	-0.1059	5.73425e-08	-0.1059	4.57458e-08	-0.1059	2.8717e-08	-0.1059	3.43933e-08
-0.10345	7.55005e-08	-0.10345	5.88989e-08	-0.10345	4.73938e-08	-0.10345	3.07007e-08	-0.10345	3.8147e-08
-0.10101	7.68433e-08	-0.10101	6.01196e-08	-0.10101	4.98352e-08	-0.10101	3.35388e-08	-0.10101	4.26636e-08
-0.09857	7.8064e-08	-0.09857	6.14929e-08	-0.09857	5.17883e-08	-0.09857	3.56445e-08	-0.09857	4.68445e-08
-0.09613	7.92236e-08	-0.09613	6.30493e-08	-0.09613	5.32532e-08	-0.09613	3.83911e-08	-0.09613	5.14526e-08
-0.09369	8.01086e-08	-0.09369	6.44226e-08	-0.09369	5.52979e-08	-0.09369	4.08936e-08	-0.09369	5.53284e-08
-0.09125	8.12988e-08	-0.09125	6.5979e-08	-0.09125	5.69763e-08	-0.09125	4.2572e-08	-0.09125	5.94177e-08
-0.08881	8.26416e-08	-0.08881	6.81152e-08	-0.08881	5.9082e-08	-0.08881	4.52576e-08	-0.08881	6.32629e-08
-0.08636	8.4259e-08	-0.08636	6.93054e-08	-0.08636	6.08826e-08	-0.08636	4.76379e-08	-0.08636	6.77795e-08
-0.08392	8.60901e-08	-0.08392	7.01904e-08	-0.08392	6.2439e-08	-0.08392	4.97742e-08	-0.08392	7.19299e-08
-0.08148	8.70972e-08	-0.08148	7.19299e-08	-0.08148	6.45447e-08	-0.08148	5.23071e-08	-0.08148	7.56836e-08
-0.07904	8.82263e-08	-0.07904	7.34253e-08	-0.07904	6.604e-08	-0.07904	5.47791e-08	-0.07904	7.97424e-08
-0.0766	8.96606e-08	-0.0766	7.47986e-08	-0.0766	6.78406e-08	-0.0766	5.70984e-08	-0.0766	8.38013e-08
-0.07416	9.11255e-08	-0.07416	7.62634e-08	-0.07416	6.92139e-08	-0.07416	5.88989e-08	-0.07416	8.71887e-08
-0.07172	9.16443e-08	-0.07172	7.75452e-08	-0.07172	7.13196e-08	-0.07172	6.16455e-08	-0.07172	9.20715e-08
-0.06927	9.24988e-08	-0.06927	7.93152e-08	-0.06927	7.30896e-08	-0.06927	6.3324e-08	-0.06927	9.53064e-08
-0.06683	9.33838e-08	-0.06683	8.05054e-08	-0.06683	7.51038e-08	-0.06683	6.56128e-08	-0.06683	9.92126e-08
-0.06439	9.45435e-08	-0.06439	8.19397e-08	-0.06439	7.61108e-08	-0.06439	6.70471e-08	-0.06439	1.02875e-07
-0.06195	9.56421e-08	-0.06195	8.34656e-08	-0.06195	7.82776e-08	-0.06195	6.97021e-08	-0.06195	1.07544e-07
-0.05951	9.70459e-08	-0.05951	8.45642e-08	-0.05951	8.00171e-08	-0.05951	7.18994e-08	-0.05951	1.11176e-07
-0.05707	9.82361e-08	-0.05707	8.64868e-08	-0.05707	8.20618e-08	-0.05707	7.39441e-08	-0.05707	1.1499e-07
-0.05463	9.90601e-08	-0.05463	8.78601e-08	-0.05463	8.38623e-08	-0.05463	7.59888e-08	-0.05463	1.18988e-07
-0.05219	1.00739e-07	-0.05219	8.91113e-08	-0.05219	8.52356e-08	-0.05219	7.80029e-08	-0.05219	1.22742e-07
-0.04974	1.02234e-07	-0.04974	9.03015e-08	-0.04974	8.70667e-08	-0.04974	8.04443e-08	-0.04974	1.26923e-07
-0.0473	1.02997e-07	-0.0473	9.17664e-08	-0.0473	8.89893e-08	-0.0473	8.25806e-08	-0.0473	1.3089e-07
-0.04486	1.03943e-07	-0.04486	9.35059e-08	-0.04486	9.03625e-08	-0.04486	8.45642e-08	-0.04486	1.34613e-07
-0.04242	1.05347e-07	-0.04242	9.4696e-08	-0.04242	9.23767e-08	-0.04242	8.68835e-08	-0.04242	1.39313e-07
-0.03998	1.06506e-07	-0.03998	9.6283e-08	-0.03998	9.40247e-08	-0.03998	8.90808e-08	-0.03998	1.42731e-07
-0.03754	1.08276e-07	-0.03754	9.75037e-08	-0.03754	9.53979e-08	-0.03754	9.09424e-08	-0.03754	1.46759e-07
-0.0351	1.09192e-07	-0.0351	9.8877e-08	-0.0351	9.73511e-08	-0.0351	9.32007e-08	-0.0351	1.50269e-07
-0.03265	1.10382e-07	-0.03265	1.00525e-07	-0.03265	9.92432e-08	-0.03265	9.52148e-08	-0.03265	1.54388e-07
-0.03021	1.11969e-07	-0.03021	1.01837e-07	-0.03021	1.0141e-07	-0.03021	9.78088e-08	-0.03021	1.58295e-07
-0.02777	1.12396e-07	-0.02777	1.03668e-07	-0.02777	1.02966e-07	-0.02777	1.00159e-07	-0.02777	1.62445e-07
-0.02533	1.14258e-07	-0.02533	1.04675e-07	-0.02533	1.04309e-07	-0.02533	1.01685e-07	-0.02533	1.66534e-07
-0.02289	1.15417e-07	-0.02289	1.06506e-07	-0.02289	1.0672e-07	-0.02289	1.03882e-07	-0.02289	1.70044e-07
-0.02045	1.16547e-07	-0.02045	1.07758e-07	-0.02045	1.08063e-07	-0.02045	1.06354e-07	-0.02045	1.73615e-07
-0.01801	1.18225e-07	-0.01801	1.09344e-07	-0.01801	1.10046e-07	-0.01801	1.08917e-07	-0.01801	1.7807e-07
-0.01556	1.18927e-07	-0.01556	1.10931e-07	-0.01556	1.11633e-07	-0.01556	1.10809e-07	-0.01556	1.82037e-07
-0.01312	1.20178e-07	-0.01312	1.12091e-07	-0.01312	1.1319e-07	-0.01312	1.1264e-07	-0.01312	1.86523e-07
-0.01068	1.21735e-07	-0.01068	1.13525e-07	-0.01068	1.15234e-07	-0.01068	1.15204e-07	-0.01068	1.89911e-07
-0.00824	1.23138e-07	-0.00824	1.15051e-07	-0.00824	1.17096e-07	-0.00824	1.17889e-07	-0.00824	1.94824e-07
-0.0058	1.24573e-07	-0.0058	1.16913e-07	-0.0058	1.1911e-07	-0.0058	1.19141e-07	-0.0058	1.98334e-07
-0.00336	1.25885e-07	-0.00336	1.18744e-07	-0.00336	1.20697e-07	-0.00336	1.21704e-07	-0.00336	2.03217e-07
-0.000915527	1.26892e-07	-0.000915527	1.19843e-07	-0.000915527	1.22864e-07	-0.000915527	1.23718e-07	-0.000915527	2.07397e-07
0.00153	1.27838e-07	0.00153	1.21094e-07	0.00153	1.24573e-07	0.00153	1.26038e-07	0.00153	2.10999e-07
0.00397	1.2912e-07	0.00397	1.22711e-07	0.00397	1.26617e-07	0.00397	1.28448e-07	0.00397	2.1582e-07
0.00641	1.30737e-07	0.00641	1.24115e-07	0.00641	1.2854e-07	0.00641	1.30859e-07	0.00641	2.20215e-07
0.00885	1.31989e-07	0.00885	1.25671e-07	0.00885	1.30219e-07	0.00885	1.32874e-07	0.00885	2.24396e-07
0.01129	1.3327e-07	0.01129	1.27991e-07	0.01129	1.32721e-07	0.01129	1.35468e-07	0.01129	2.28882e-07
0.01373	1.34583e-07	0.01373	1.29242e-07	0.01373	1.34369e-07	0.01373	1.37756e-07	0.01373	2.31964e-07
0.01617	1.35895e-07	0.01617	1.31104e-07	0.01617	1.36749e-07	0.01617	1.40381e-07	0.01617	2.37244e-07
0.01862	1.37512e-07	0.01862	1.32111e-07	0.01862	1.37909e-07	0.01862	1.427e-07	0.01862	2.41852e-07
0.02106	1.39008e-07	0.02106	1.34552e-07	0.02106	1.40533e-07	0.02106	1.45569e-07	0.02106	2.46704e-07
0.0235	1.39954e-07	0.0235	1.35742e-07	0.0235	1.42487e-07	0.0235	1.47644e-07	0.0235	2.51007e-07
0.02594	1.41602e-07	0.02594	1.37177e-07	0.02594	1.44379e-07	0.02594	1.49811e-07	0.02594	2.55463e-07
0.02838	1.43127e-07	0.02838	1.38855e-07	0.02838	1.46149e-07	0.02838	1.52985e-07	0.02838	2.59888e-07
0.03082	1.44806e-07	0.03082	1.40717e-07	0.03082	1.48346e-07	0.03082	1.55396e-07	0.03082	2.64282e-07
0.03326	1.45844e-07	0.03326	1.42365e-07	0.03326	1.49994e-07	0.03326	1.57654e-07	0.03326	2.69501e-07
0.03571	1.47522e-07	0.03571	1.44043e-07	0.03571	1.52466e-07	0.03571	1.61011e-07	0.03571	2.73651e-07
0.03815	1.48499e-07	0.03815	1.45508e-07	0.03815	1.54541e-07	0.03815	1.63757e-07	0.03815	2.78259e-07
0.04059	1.49963e-07	0.04059	1.47339e-07	0.04059	1.56738e-07	0.04059	1.66565e-07	0.04059	2.83386e-07
0.04303	1.50848e-07	0.04303	1.49597e-07	0.04303	1.58447e-07	0.04303	1.68793e-07	0.04303	2.87476e-07
0.04547	1.52435e-07	0.04547	1.51306e-07	0.04547	1.61041e-07	0.04547	1.72028e-07	0.04547	2.92511e-07
0.04791	1.539e-07	0.04791	1.52863e-07	0.04791	1.62964e-07	0.04791	1.74652e-07	0.04791	2.97668e-07
0.05035	1.55731e-07	0.05035	1.55243e-07	0.05035	1.65588e-07	0.05035	1.77765e-07	0.05035	3.02856e-07
0.0528	1.56555e-07	0.0528	1.56891e-07	0.0528	1.67511e-07	0.0528	1.80542e-07	0.0528	3.07648e-07
0.05524	1.58997e-07	0.05524	1.58966e-07	0.05524	1.69708e-07	0.05524	1.83838e-07	0.05524	3.12714e-07
0.05768	1.60248e-07	0.05768	1.60675e-07	0.05768	1.72028e-07	0.05768	1.86493e-07	0.05768	3.1723e-07
0.06012	1.61957e-07	0.06012	1.63147e-07	0.06012	1.74835e-07	0.06012	1.89941e-07	0.06012	3.22876e-07
0.06256	1.6333e-07	0.06256	1.64429e-07	0.06256	1.77246e-07	0.06256	1.93176e-07	0.06256	3.28186e-07
0.065	1.64856e-07	0.065	1.66443e-07	0.065	1.79596e-07	0.065	1.9635e-07	0.065	3.33374e-07
0.06744	1.66901e-07	0.06744	1.68762e-07	0.06744	1.82007e-07	0.06744	1.99371e-07	0.06744	3.38654e-07
0.06989	1.68945e-07	0.06989	1.70654e-07	0.06989	1.85089e-07	0.06989	2.0285e-07	0.06989	3.43872e-07
0.07233	1.70593e-07	0.07233	1.7276e-07	0.07233	1.87103e-07	0.07233	2.06085e-07	0.07233	3.48969e-07
0.07477	1.72089e-07	0.07477	1.74774e-07	0.07477	1.89819e-07	0.07477	2.08893e-07	0.07477	3.5498e-07
0.07721	1.7392e-07	0.07721	1.77094e-07	0.07721	1.9281e-07	0.07721	2.1225e-07	0.07721	3.60291e-07
0.07965	1.75781e-07	0.07965	1.7981e-07	0.07965	1.95404e-07	0.07965	2.16675e-07	0.07965	3.66302e-07
0.08209	1.77429e-07	0.08209	1.8161e-07	0.08209	1.9812e-07	0.08209	2.20184e-07	0.08209	3.71643e-07
0.08453	1.79169e-07	0.08453	1.8396e-07	0.08453	2.00989e-07	0.08453	2.22992e-07	0.08453	3.77289e-07
0.08698	1.81458e-07	0.08698	1.85944e-07	0.08698	2.03735e-07	0.08698	2.26837e-07	0.08698	3.83087e-07
0.08942	1.83228e-07	0.08942	1.89178e-07	0.08942	2.06879e-07	0.08942	2.30957e-07	0.08942	3.89343e-07
0.09186	1.85089e-07	0.09186	1.90643e-07	0.09186	2.09412e-07	0.09186	2.34344e-07	0.09186	3.94989e-07
0.0943	1.87592e-07	0.0943	1.93451e-07	0.0943	2.12646e-07	0.0943	2.38037e-07	0.0943	4.01245e-07
0.09674	1.89636e-07	0.09674	1.95404e-07	0.09674	2.15424e-07	0.09674	2.4231e-07	0.09674	4.07379e-07
0.09918	1.91772e-07	0.09918	1.9809e-07	0.09918	2.18658e-07	0.09918	2.45941e-07	0.09918	4.13574e-07
0.10162	1.93481e-07	0.10162	2.00806e-07	0.10162	2.21863e-07	0.10162	2.50244e-07	0.10162	4.1925e-07
0.10406	1.95801e-07	0.10406	2.03156e-07	0.10406	2.24792e-07	0.10406	2.54059e-07	0.10406	4.25934e-07
0.10651	1.97906e-07	0.10651	2.05414e-07	0.10651	2.28333e-07	0.10651	2.57996e-07	0.10651	4.32343e-07
0.10895	2.00226e-07	0.10895	2.08801e-07	0.10895	2.32086e-07	0.10895	2.62665e-07	0.10895	4.38965e-07
0.11139	2.02087e-07	0.11139	2.11395e-07	0.11139	2.35199e-07	0.11139	2.66724e-07	0.11139	4.45007e-07
0.11383	2.05231e-07	0.11383	2.13715e-07	0.11383	2.39044e-07	0.11383	2.71332e-07	0.11383	4.52148e-07
0.11627	2.07031e-07	0.11627	2.16278e-07	0.11627	2.42401e-07	0.11627	2.75787e-07	0.11627	4.58496e-07
0.11871	2.09625e-07	0.11871	2.19482e-07	0.11871	2.46002e-07	0.11871	2.8067e-07	0.11871	4.65332e-07
0.12115	2.11426e-07	0.12115	2.22382e-07	0.12115	2.49573e-07	0.12115	2.84943e-07	0.12115	4.71924e-07
0.1236	2.13745e-07	0.1236	2.2522e-07	0.1236	2.53326e-07	0.1236	2.89948e-07	0.1236	4.79492e-07
0.12604	2.15912e-07	0.12604	2.2821e-07	0.12604	2.56622e-07	0.12604	2.94617e-07	0.12604	4.86877e-07
0.12848	2.18719e-07	0.12848	2.31506e-07	0.12848	2.61017e-07	0.12848	3.0011e-07	0.12848	4.94324e-07
0.13092	2.20978e-07	0.13092	2.34192e-07	0.13092	2.64526e-07	0.13092	3.04565e-07	0.13092	5.01221e-07
0.13336	2.23083e-07	0.13336	2.37488e-07	0.13336	2.68707e-07	0.13336	3.09753e-07	0.13336	5.08911e-07
0.1358	2.25464e-07	0.1358	2.40631e-07	0.1358	2.72186e-07	0.1358	3.14636e-07	0.1358	5.15717e-07
0.13824	2.27936e-07	0.13824	2.43652e-07	0.13824	2.76825e-07	0.13824	3.20374e-07	0.13824	5.24139e-07
0.14069	2.30316e-07	0.14069	2.46979e-07	0.14069	2.80701e-07	0.14069	3.25226e-07	0.14069	5.30792e-07
0.14313	2.33002e-07	0.14313	2.50275e-07	0.14313	2.85065e-07	0.14313	3.3078e-07	0.14313	5.38971e-07
0.14557	2.35413e-07	0.14557	2.53815e-07	0.14557	2.89032e-07	0.14557	3.36212e-07	0.14557	5.47394e-07
0.14801	2.38403e-07	0.14801	2.5769e-07	0.14801	2.9361e-07	0.14801	3.42102e-07	0.14801	5.55206e-07
0.15045	2.40631e-07	0.15045	2.60834e-07	0.15045	2.97974e-07	0.15045	3.47626e-07	0.15045	5.63354e-07
0.15289	2.43774e-07	0.15289	2.64618e-07	0.15289	3.02734e-07	0.15289	3.53668e-07	0.15289	5.7193e-07
0.15533	2.46521e-07	0.15533	2.67853e-07	0.15533	3.07068e-07	0.15533	3.59344e-07	0.15533	5.79834e-07
0.15778	2.49237e-07	0.15778	2.71393e-07	0.15778	3.11859e-07	0.15778	3.65692e-07	0.15778	5.88409e-07
0.16022	2.52014e-07	0.16022	2.75269e-07	0.16022	3.16223e-07	0.16022	3.71429e-07	0.16022	5.96619e-07
0.16266	2.54486e-07	0.16266	2.79297e-07	0.16266	3.20923e-07	0.16266	3.77686e-07	0.16266	6.05103e-07
0.1651	2.57477e-07	0.1651	2.83203e-07	0.1651	3.2605e-07	0.1651	3.84064e-07	0.1651	6.13098e-07
0.16754	2.60376e-07	0.16754	2.87109e-07	0.16754	3.30994e-07	0.16754	3.90472e-07	0.16754	6.22864e-07
0.16998	2.62817e-07	0.16998	2.90955e-07	0.16998	3.36029e-07	0.16998	3.96851e-07	0.16998	6.30798e-07
0.17242	2.66083e-07	0.17242	2.95349e-07	0.17242	3.41583e-07	0.17242	4.03564e-07	0.17242	6.41479e-07
0.17487	2.69043e-07	0.17487	2.99103e-07	0.17487	3.46558e-07	0.17487	4.09546e-07	0.17487	6.51245e-07
0.17731	2.72888e-07	0.17731	3.03589e-07	0.17731	3.52448e-07	0.17731	4.16382e-07	0.17731	6.5979e-07
0.17975	2.75574e-07	0.17975	3.07983e-07	0.17975	3.57666e-07	0.17975	4.23737e-07	0.17975	6.71082e-07
0.18219	2.7948e-07	0.18219	3.11981e-07	0.18219	3.63251e-07	0.18219	4.30939e-07	0.18219	6.79626e-07
0.18463	2.82227e-07	0.18463	3.16772e-07	0.18463	3.6908e-07	0.18463	4.37469e-07	0.18463	6.91528e-07
0.18707	2.8653e-07	0.18707	3.21411e-07	0.18707	3.75092e-07	0.18707	4.45465e-07	0.18707	7.01599e-07
0.18951	2.89459e-07	0.18951	3.25684e-07	0.18951	3.80219e-07	0.18951	4.52576e-07	0.18951	7.1106e-07
0.19196	2.93335e-07	0.19196	3.30963e-07	0.19196	3.86536e-07	0.19196	4.60602e-07	0.19196	7.22351e-07
0.1944	2.96844e-07	0.1944	3.35266e-07	0.1944	3.92578e-07	0.1944	4.67926e-07	0.1944	7.33032e-07
0.19684	3.00751e-07	0.19684	3.40546e-07	0.19684	3.98529e-07	0.19684	4.75922e-07	0.19684	7.44019e-07
0.19928	3.04352e-07	0.19928	3.45032e-07	0.19928	4.04968e-07	0.19928	4.83612e-07	0.19928	7.547e-07
0.20172	3.08105e-07	0.20172	3.49884e-07	0.20172	4.10889e-07	0.20172	4.91394e-07	0.20172	7.65076e-07
0.20416	3.12195e-07	0.20416	3.55469e-07	0.20416	4.1748e-07	0.20416	4.99359e-07	0.20416	7.75757e-07
0.2066	3.15643e-07	0.2066	3.60779e-07	0.2066	4.24316e-07	0.2066	5.07751e-07	0.2066	7.87659e-07
0.20905	3.19305e-07	0.20905	3.65387e-07	0.20905	4.30878e-07	0.20905	5.159e-07	0.20905	7.98035e-07
0.21149	3.2373e-07	0.21149	3.71307e-07	0.21149	4.375e-07	0.21149	5.24811e-07	0.21149	8.10852e-07
0.21393	3.27148e-07	0.21393	3.7674e-07	0.21393	4.4455e-07	0.21393	5.33234e-07	0.21393	8.20313e-07
0.21637	3.31818e-07	0.21637	3.82416e-07	0.21637	4.51538e-07	0.21637	5.42969e-07	0.21637	8.34045e-07
0.21881	3.35358e-07	0.21881	3.87817e-07	0.21881	4.58801e-07	0.21881	5.50934e-07	0.21881	8.45642e-07
0.22125	3.39905e-07	0.22125	3.93921e-07	0.22125	4.66064e-07	0.22125	5.60272e-07	0.22125	8.57239e-07
0.22369	3.44208e-07	0.22369	3.99597e-07	0.22369	4.73236e-07	0.22369	5.69519e-07	0.22369	8.68225e-07
0.22614	3.48663e-07	0.22614	4.05914e-07	0.22614	4.81201e-07	0.22614	5.79468e-07	0.22614	8.82568e-07
0.22858	3.52905e-07	0.22858	4.11713e-07	0.22858	4.88464e-07	0.22858	5.88806e-07	0.22858	8.9447e-07
0.23102	3.58124e-07	0.23102	4.17969e-07	0.23102	4.96735e-07	0.23102	5.98419e-07	0.23102	9.07593e-07
0.23346	3.62549e-07	0.23346	4.24072e-07	0.23346	5.03601e-07	0.23346	6.07849e-07	0.23346	9.19189e-07
0.2359	3.67401e-07	0.2359	4.3045e-07	0.2359	5.12543e-07	0.2359	6.1676e-07	0.2359	9.33838e-07
0.23834	3.72284e-07	0.23834	4.36279e-07	0.23834	5.20081e-07	0.23834	6.25916e-07	0.23834	9.4635e-07
0.24078	3.76617e-07	0.24078	4.42932e-07	0.24078	5.28717e-07	0.24078	6.36597e-07	0.24078	9.60083e-07
0.24323	3.81622e-07	0.24323	4.49707e-07	0.24323	5.37231e-07	0.24323	6.47278e-07	0.24323	9.74121e-07
0.24567	3.87024e-07	0.24567	4.56604e-07	0.24567	5.46387e-07	0.24567	6.57043e-07	0.24567	9.89075e-07
0.24811	3.91693e-07	0.24811	4.6347e-07	0.24811	5.54596e-07	0.24811	6.68945e-07	0.24811	1.00128e-06
0.25055	3.97278e-07	0.25055	4.70184e-07	0.25055	5.63599e-07	0.25055	6.79321e-07	0.25055	1.01685e-06
0.25299	4.02313e-07	0.25299	4.77081e-07	0.25299	5.72113e-07	0.25299	6.89087e-07	0.25299	1.03088e-06
0.25543	4.0802e-07	0.25543	4.84833e-07	0.25543	5.81329e-07	0.25543	7.00989e-07	0.25543	1.04645e-06
0.25787	4.13361e-07	0.25787	4.91547e-07	0.25787	5.90057e-07	0.25787	7.11365e-07	0.25787	1.0611e-06
0.26031	4.18671e-07	0.26031	4.98566e-07	0.26031	5.99304e-07	0.26031	7.22961e-07	0.26031	1.07635e-06
0.26276	4.245e-07	0.26276	5.06195e-07	0.26276	6.08795e-07	0.26276	7.33948e-07	0.26276	1.09253e-06
0.2652	4.3045e-07	0.2652	5.14069e-07	0.2652	6.17371e-07	0.2652	7.4585e-07	0.2652	1.10748e-06
0.26764	4.35913e-07	0.26764	5.2121e-07	0.26764	6.26831e-07	0.26764	7.57751e-07	0.26764	1.12366e-06
0.27008	4.42047e-07	0.27008	5.29358e-07	0.27008	6.36902e-07	0.27008	7.69958e-07	0.27008	1.13892e-06
0.27252	4.47815e-07	0.27252	5.36194e-07	0.27252	6.46057e-07	0.27252	7.8064e-07	0.27252	1.15479e-06
0.27496	4.53888e-07	0.27496	5.44342e-07	0.27496	6.56128e-07	0.27496	7.93152e-07	0.27496	1.17126e-06
0.2774	4.59656e-07	0.2774	5.52063e-07	0.2774	6.65588e-07	0.2774	8.05054e-07	0.2774	1.18744e-06
0.27985	4.65576e-07	0.27985	5.59967e-07	0.27985	6.75659e-07	0.27985	8.16956e-07	0.27985	1.20453e-06
0.28229	4.72321e-07	0.28229	5.68665e-07	0.28229	6.86951e-07	0.28229	8.29163e-07	0.28229	1.22101e-06
0.28473	4.78058e-07	0.28473	5.76385e-07	0.28473	6.97021e-07	0.28473	8.4259e-07	0.28473	1.23749e-06
0.28717	4.8407e-07	0.28717	5.84961e-07	0.28717	7.07703e-07	0.28717	8.54187e-07	0.28717	1.25458e-06
0.28961	4.90967e-07	0.28961	5.9314e-07	0.28961	7.18384e-07	0.28961	8.67004e-07	0.28961	1.27258e-06
0.29205	4.97162e-07	0.29205	6.0141e-07	0.29205	7.28455e-07	0.29205	8.80432e-07	0.29205	1.28998e-06
0.29449	5.04242e-07	0.29449	6.09436e-07	0.29449	7.39441e-07	0.29449	8.92639e-07	0.29449	1.30768e-06
0.29694	5.10681e-07	0.29694	6.17065e-07	0.29694	7.49817e-07	0.29694	9.06372e-07	0.29694	1.32477e-06
0.29938	5.17517e-07	0.29938	6.24695e-07	0.29938	7.60193e-07	0.29938	9.18884e-07	0.29938	1.34186e-06
0.30182	5.23834e-07	0.30182	6.3385e-07	0.30182	7.72095e-07	0.30182	9.32617e-07	0.30182	1.36139e-06
0.30426	5.31372e-07	0.30426	6.43616e-07	0.30426	7.83691e-07	0.30426	9.4574e-07	0.30426	1.37848e-06
0.3067	5.37567e-07	0.3067	6.52466e-07	0.3067	7.93762e-07	0.3067	9.59167e-07	0.3067	1.39679e-06
0.30914	5.44861e-07	0.30914	6.61011e-07	0.30914	8.05664e-07	0.30914	9.73206e-07	0.30914	1.4151e-06
0.31158	5.51636e-07	0.31158	6.69861e-07	0.31158	8.16345e-07	0.31158	9.86023e-07	0.31158	1.43341e-06
0.31403	5.58838e-07	0.31403	6.78406e-07	0.31403	8.28247e-07	0.31403	9.99451e-07	0.31403	1.45142e-06
0.31647	5.65491e-07	0.31647	6.88477e-07	0.31647	8.39539e-07	0.31647	1.01379e-06	0.31647	1.47034e-06
0.31891	5.72723e-07	0.31891	6.97327e-07	0.31891	8.5083e-07	0.31891	1.02753e-06	0.31891	1.48895e-06
0.32135	5.79712e-07	0.32135	7.06787e-07	0.32135	8.62427e-07	0.32135	1.04095e-06	0.32135	1.50818e-06
0.32379	5.87433e-07	0.32379	7.15332e-07	0.32379	8.74329e-07	0.32379	1.0553e-06	0.32379	1.52771e-06
0.32623	5.94818e-07	0.32623	7.24182e-07	0.32623	8.86536e-07	0.32623	1.06964e-06	0.32623	1.54633e-06
0.32867	6.0202e-07	0.32867	7.34558e-07	0.32867	8.98132e-07	0.32867	1.08398e-06	0.32867	1.56616e-06
0.33112	6.0791e-07	0.33112	7.42493e-07	0.33112	9.08813e-07	0.33112	1.09833e-06	0.33112	1.58539e-06
0.33356	6.15234e-07	0.33356	7.53174e-07	0.33356	9.21631e-07	0.33356	1.11328e-06	0.33356	1.60553e-06
0.336	6.23169e-07	0.336	7.62634e-07	0.336	9.32617e-07	0.336	1.12671e-06	0.336	1.62323e-06
0.33844	6.29883e-07	0.33844	7.71484e-07	0.33844	9.45129e-07	0.33844	1.14075e-06	0.33844	1.64307e-06
0.34088	6.38123e-07	0.34088	7.82166e-07	0.34088	9.57336e-07	0.34088	1.15631e-06	0.34088	1.6629e-06
0.34332	6.45752e-07	0.34332	7.91931e-07	0.34332	9.69849e-07	0.34332	1.17096e-06	0.34332	1.68274e-06
0.34576	6.53687e-07	0.34576	8.01392e-07	0.34576	9.82056e-07	0.34576	1.18622e-06	0.34576	1.70288e-06
0.34821	6.61011e-07	0.34821	8.11157e-07	0.34821	9.94568e-07	0.34821	1.20087e-06	0.34821	1.72455e-06
0.35065	6.6864e-07	0.35065	8.21228e-07	0.35065	1.00586e-06	0.35065	1.21521e-06	0.35065	1.74225e-06
0.35309	6.7627e-07	0.35309	8.30688e-07	0.35309	1.01898e-06	0.35309	1.22894e-06	0.35309	1.76331e-06
0.35553	6.84509e-07	0.35553	8.40759e-07	0.35553	1.03088e-06	0.35553	1.2442e-06	0.35553	1.78284e-06
0.35797	6.93054e-07	0.35797	8.50525e-07	0.35797	1.0434e-06	0.35797	1.26038e-06	0.35797	1.80298e-06
0.36041	7.00378e-07	0.36041	8.61206e-07	0.36041	1.05621e-06	0.36041	1.27441e-06	0.36041	1.82251e-06
0.36285	7.09229e-07	0.36285	8.71277e-07	0.36285	1.06903e-06	0.36285	1.2912e-06	0.36285	1.84479e-06
0.3653	7.16858e-07	0.3653	8.81348e-07	0.3653	1.08093e-06	0.3653	1.30585e-06	0.3653	1.86432e-06
0.36774	7.24792e-07	0.36774	8.91724e-07	0.36774	1.09283e-06	0.36774	1.32172e-06	0.36774	1.88629e-06
0.37018	7.32727e-07	0.37018	9.01184e-07	0.37018	1.10596e-06	0.37018	1.33667e-06	0.37018	1.90582e-06
0.37262	7.41882e-07	0.37262	9.11255e-07	0.37262	1.11847e-06	0.37262	1.35284e-06	0.37262	1.92688e-06
0.37506	7.49207e-07	0.37506	9.21936e-07	0.37506	1.13068e-06	0.37506	1.36719e-06	0.37506	1.94702e-06
0.3775	7.57141e-07	0.3775	9.32007e-07	0.3775	1.14502e-06	0.3775	1.38306e-06	0.3775	1.96838e-06
0.37994	7.65381e-07	0.37994	9.42993e-07	0.37994	1.15723e-06	0.37994	1.39832e-06	0.37994	1.98975e-06
0.38239	7.73926e-07	0.38239	9.52759e-07	0.38239	1.17065e-06	0.38239	1.41479e-06	0.38239	2.01141e-06
0.38483	7.82471e-07	0.38483	9.6283e-07	0.38483	1.18347e-06	0.38483	1.42944e-06	0.38483	2.03278e-06
0.38727	7.901e-07	0.38727	9.74731e-07	0.38727	1.19659e-06	0.38727	1.44592e-06	0.38727	2.05353e-06
0.38971	7.99561e-07	0.38971	9.84802e-07	0.38971	1.2088e-06	0.38971	1.46179e-06	0.38971	2.07428e-06
0.39215	8.078e-07	0.39215	9.95178e-07	0.39215	1.22223e-06	0.39215	1.47827e-06	0.39215	2.09595e-06
0.39459	8.17261e-07	0.39459	1.00677e-06	0.39459	1.23535e-06	0.39459	1.49414e-06	0.39459	2.117e-06
0.39703	8.24585e-07	0.39703	1.01654e-06	0.39703	1.24817e-06	0.39703	1.51031e-06	0.39703	2.13867e-06
0.39948	8.3374e-07	0.39948	1.02753e-06	0.39948	1.26282e-06	0.39948	1.52618e-06	0.39948	2.16217e-06
0.40192	8.4259e-07	0.40192	1.03912e-06	0.40192	1.27594e-06	0.40192	1.54327e-06	0.40192	2.18323e-06
0.40436	8.5083e-07	0.40436	1.04919e-06	0.40436	1.28967e-06	0.40436	1.55975e-06	0.40436	2.20459e-06
0.4068	8.59985e-07	0.4068	1.06079e-06	0.4068	1.30341e-06	0.4068	1.57623e-06	0.4068	2.22839e-06
0.40924	8.68835e-07	0.40924	1.07178e-06	0.40924	1.31622e-06	0.40924	1.59332e-06	0.40924	2.24976e-06
0.41168	8.77991e-07	0.41168	1.08276e-06	0.41168	1.32996e-06	0.41168	1.61011e-06	0.41168	2.27234e-06
0.41412	8.87146e-07	0.41412	1.09375e-06	0.41412	1.3443e-06	0.41412	1.62659e-06	0.41412	2.29553e-06
0.41656	8.96301e-07	0.41656	1.10504e-06	0.41656	1.35773e-06	0.41656	1.64307e-06	0.41656	2.3172e-06
0.41901	9.04846e-07	0.41901	1.11603e-06	0.41901	1.37146e-06	0.41901	1.66046e-06	0.41901	2.34039e-06
0.42145	9.14001e-07	0.42145	1.12823e-06	0.42145	1.38519e-06	0.42145	1.67786e-06	0.42145	2.36298e-06
0.42389	9.23462e-07	0.42389	1.13861e-06	0.42389	1.40015e-06	0.42389	1.69373e-06	0.42389	2.38586e-06
0.42633	9.32617e-07	0.42633	1.15112e-06	0.42633	1.41479e-06	0.42633	1.71173e-06	0.42633	2.40936e-06
0.42877	9.42383e-07	0.42877	1.16241e-06	0.42877	1.42914e-06	0.42877	1.72852e-06	0.42877	2.43286e-06
0.43121	9.52148e-07	0.43121	1.17401e-06	0.43121	1.44379e-06	0.43121	1.74683e-06	0.43121	2.45605e-06
0.43365	9.61609e-07	0.43365	1.18591e-06	0.43365	1.45813e-06	0.43365	1.76422e-06	0.43365	2.47955e-06
0.4361	9.70764e-07	0.4361	1.19751e-06	0.4361	1.47247e-06	0.4361	1.78284e-06	0.4361	2.50397e-06
0.43854	9.79919e-07	0.43854	1.20972e-06	0.43854	1.48743e-06	0.43854	1.80054e-06	0.43854	2.52625e-06
0.44098	9.90601e-07	0.44098	1.22192e-06	0.44098	1.50299e-06	0.44098	1.81915e-06	0.44098	2.55249e-06
0.44342	1.00037e-06	0.44342	1.23383e-06	0.44342	1.51733e-06	0.44342	1.83655e-06	0.44342	2.57629e-06
0.44586	1.01044e-06	0.44586	1.24634e-06	0.44586	1.53351e-06	0.44586	1.85638e-06	0.44586	2.59979e-06
0.4483	1.0202e-06	0.4483	1.25793e-06	0.4483	1.54724e-06	0.4483	1.87317e-06	0.4483	2.62451e-06
0.45074	1.03119e-06	0.45074	1.27014e-06	0.45074	1.56433e-06	0.45074	1.89331e-06	0.45074	2.65076e-06
0.45319	1.04095e-06	0.45319	1.28387e-06	0.45319	1.5799e-06	0.45319	1.91071e-06	0.45319	2.67365e-06
0.45563	1.05225e-06	0.45563	1.29639e-06	0.45563	1.59424e-06	0.45563	1.93085e-06	0.45563	2.69897e-06
0.45807	1.0611e-06	0.45807	1.30859e-06	0.45807	1.61011e-06	0.45807	1.94946e-06	0.45807	2.72491e-06
0.46051	1.07178e-06	0.46051	1.32202e-06	0.46051	1.62659e-06	0.46051	1.9693e-06	0.46051	2.75116e-06
0.46295	1.08093e-06	0.46295	1.33484e-06	0.46295	1.64185e-06	0.46295	1.98883e-06	0.46295	2.77618e-06
0.46539	1.09344e-06	0.46539	1.34735e-06	0.46539	1.65863e-06	0.46539	2.00928e-06	0.46539	2.80243e-06
0.46783	1.10352e-06	0.46783	1.35986e-06	0.46783	1.67389e-06	0.46783	2.02759e-06	0.46783	2.82776e-06
0.47028	1.1145e-06	0.47028	1.37329e-06	0.47028	1.69037e-06	0.47028	2.04773e-06	0.47028	2.85522e-06
0.47272	1.12457e-06	0.47272	1.38702e-06	0.47272	1.70715e-06	0.47272	2.06696e-06	0.47272	2.88086e-06
0.47516	1.13586e-06	0.47516	1.39984e-06	0.47516	1.72333e-06	0.47516	2.08679e-06	0.47516	2.90741e-06
0.4776	1.14685e-06	0.4776	1.41327e-06	0.4776	1.74011e-06	0.4776	2.10754e-06	0.4776	2.93335e-06
0.48004	1.15845e-06	0.48004	1.42853e-06	0.48004	1.75751e-06	0.48004	2.1286e-06	0.48004	2.96234e-06
0.48248	1.16974e-06	0.48248	1.44135e-06	0.48248	1.77399e-06	0.48248	2.14844e-06	0.48248	2.98828e-06
0.48492	1.18073e-06	0.48492	1.45538e-06	0.48492	1.79199e-06	0.48492	2.16888e-06	0.48492	3.01544e-06
0.48737	1.19232e-06	0.48737	1.46912e-06	0.48737	1.80878e-06	0.48737	2.18933e-06	0.48737	3.0426e-06
0.48981	1.20361e-06	0.48981	1.48285e-06	0.48981	1.82587e-06	0.48981	2.21161e-06	0.48981	3.0719e-06
0.49225	1.21552e-06	0.49225	1.49719e-06	0.49225	1.84357e-06	0.49225	2.23267e-06	0.49225	3.09906e-06
0.49469	1.22772e-06	0.49469	1.51123e-06	0.49469	1.86157e-06	0.49469	2.25433e-06	0.49469	3.12653e-06
0.49713	1.2384e-06	0.49713	1.52618e-06	0.49713	1.87958e-06	0.49713	2.27539e-06	0.49713	3.1546e-06
0.49957	1.25122e-06	0.49957	1.54053e-06	0.49957	1.89697e-06	0.49957	2.29889e-06	0.49957	3.18359e-06
0.50201	1.26404e-06	0.50201	1.55609e-06	0.50201	1.91437e-06	0.50201	2.32025e-06	0.50201	3.21198e-06
0.50446	1.27533e-06	0.50446	1.57166e-06	0.50446	1.93359e-06	0.50446	2.34314e-06	0.50446	3.24249e-06
0.5069	1.28693e-06	0.5069	1.58539e-06	0.5069	1.9516e-06	0.5069	2.3645e-06	0.5069	3.27087e-06
0.50934	1.29944e-06	0.50934	1.60095e-06	0.50934	1.97083e-06	0.50934	2.38831e-06	0.50934	3.30078e-06
0.51178	1.31134e-06	0.51178	1.6156e-06	0.51178	1.98975e-06	0.51178	2.4115e-06	0.51178	3.33099e-06
0.51422	1.32416e-06	0.51422	1.63055e-06	0.51422	2.00806e-06	0.51422	2.43347e-06	0.51422	3.35968e-06
0.51666	1.33667e-06	0.51666	1.64764e-06	0.51666	2.02637e-06	0.51666	2.45728e-06	0.51666	3.38837e-06
0.5191	1.34979e-06	0.5191	1.6626e-06	0.5191	2.04712e-06	0.5191	2.48108e-06	0.5191	3.42072e-06
0.52155	1.36169e-06	0.52155	1.67786e-06	0.52155	2.06635e-06	0.52155	2.50397e-06	0.52155	3.45001e-06
0.52399	1.37451e-06	0.52399	1.69373e-06	0.52399	2.08588e-06	0.52399	2.52716e-06	0.52399	3.48114e-06
0.52643	1.38702e-06	0.52643	1.70868e-06	0.52643	2.10449e-06	0.52643	2.55157e-06	0.52643	3.51196e-06
0.52887	1.40015e-06	0.52887	1.72577e-06	0.52887	2.12524e-06	0.52887	2.57538e-06	0.52887	3.54309e-06
0.53131	1.41327e-06	0.53131	1.74133e-06	0.53131	2.14417e-06	0.53131	2.59949e-06	0.53131	3.57269e-06
0.53375	1.42639e-06	0.53375	1.75812e-06	0.53375	2.16522e-06	0.53375	2.62299e-06	0.53375	3.60535e-06
0.53619	1.43951e-06	0.53619	1.77429e-06	0.53619	2.18567e-06	0.53619	2.64771e-06	0.53619	3.63678e-06
0.53864	1.45386e-06	0.53864	1.79138e-06	0.53864	2.20612e-06	0.53864	2.67334e-06	0.53864	3.66791e-06
0.54108	1.46606e-06	0.54108	1.80786e-06	0.54108	2.22626e-06	0.54108	2.69775e-06	0.54108	3.70056e-06
0.54352	1.4801e-06	0.54352	1.82587e-06	0.54352	2.24823e-06	0.54352	2.72369e-06	0.54352	3.73352e-06
0.54596	1.49384e-06	0.54596	1.84082e-06	0.54596	2.26837e-06	0.54596	2.74872e-06	0.54596	3.76495e-06
0.5484	1.50787e-06	0.5484	1.85883e-06	0.5484	2.28912e-06	0.5484	2.77435e-06	0.5484	3.79791e-06
0.55084	1.52039e-06	0.55084	1.87592e-06	0.55084	2.31018e-06	0.55084	2.79968e-06	0.55084	3.83057e-06
0.55328	1.53503e-06	0.55328	1.89362e-06	0.55328	2.33063e-06	0.55328	2.82532e-06	0.55328	3.86292e-06
0.55573	1.54877e-06	0.55573	1.90979e-06	0.55573	2.35352e-06	0.55573	2.85095e-06	0.55573	3.89557e-06
0.55817	1.56342e-06	0.55817	1.92871e-06	0.55817	2.37518e-06	0.55817	2.87842e-06	0.55817	3.93066e-06
0.56061	1.57715e-06	0.56061	1.94733e-06	0.56061	2.39624e-06	0.56061	2.90466e-06	0.56061	3.96362e-06
0.56305	1.59149e-06	0.56305	1.96442e-06	0.56305	2.41852e-06	0.56305	2.9306e-06	0.56305	3.99719e-06
0.56549	1.60553e-06	0.56549	1.98242e-06	0.56549	2.44049e-06	0.56549	2.95776e-06	0.56549	4.03107e-06
0.56793	1.62109e-06	0.56793	2.00073e-06	0.56793	2.46246e-06	0.56793	2.98462e-06	0.56793	4.06433e-06
0.57037	1.63452e-06	0.57037	2.01904e-06	0.57037	2.48352e-06	0.57037	3.01086e-06	0.57037	4.09882e-06
0.57281	1.64978e-06	0.57281	2.03674e-06	0.57281	2.50641e-06	0.57281	3.03894e-06	0.57281	4.1333e-06
0.57526	1.66382e-06	0.57526	2.05566e-06	0.57526	2.52869e-06	0.57526	3.06702e-06	0.57526	4.1684e-06
0.5777	1.67755e-06	0.5777	2.07489e-06	0.5777	2.55219e-06	0.5777	3.0954e-06	0.5777	4.20319e-06
0.58014	1.69312e-06	0.58014	2.09259e-06	0.58014	2.57385e-06	0.58014	3.12256e-06	0.58014	4.23767e-06
0.58258	1.70898e-06	0.58258	2.11212e-06	0.58258	2.59827e-06	0.58258	3.15155e-06	0.58258	4.27368e-06
0.58502	1.72302e-06	0.58502	2.13104e-06	0.58502	2.62024e-06	0.58502	3.17841e-06	0.58502	4.30786e-06
0.58746	1.73798e-06	0.58746	2.15118e-06	0.58746	2.64313e-06	0.58746	3.2077e-06	0.58746	4.34326e-06
0.5899	1.75354e-06	0.5899	2.16919e-06	0.5899	2.66602e-06	0.5899	3.2373e-06	0.5899	4.37988e-06
0.59235	1.76819e-06	0.59235	2.18903e-06	0.59235	2.69012e-06	0.59235	3.26508e-06	0.59235	4.41498e-06
0.59479	1.78284e-06	0.59479	2.20856e-06	0.59479	2.71423e-06	0.59479	3.29468e-06	0.59479	4.4519e-06
0.59723	1.79962e-06	0.59723	2.22839e-06	0.59723	2.73865e-06	0.59723	3.32642e-06	0.59723	4.4873e-06
0.59967	1.81488e-06	0.59967	2.24792e-06	0.59967	2.76154e-06	0.59967	3.35419e-06	0.59967	4.52393e-06
0.60211	1.83105e-06	0.60211	2.26776e-06	0.60211	2.78656e-06	0.60211	3.38562e-06	0.60211	4.56055e-06
0.60455	1.8454e-06	0.60455	2.2876e-06	0.60455	2.81067e-06	0.60455	3.41553e-06	0.60455	4.59625e-06
0.60699	1.86096e-06	0.60699	2.30774e-06	0.60699	2.83569e-06	0.60699	3.44604e-06	0.60699	4.63501e-06
0.60944	1.87622e-06	0.60944	2.3291e-06	0.60944	2.85828e-06	0.60944	3.47656e-06	0.60944	4.67072e-06
0.61188	1.89209e-06	0.61188	2.34924e-06	0.61188	2.88361e-06	0.61188	3.50647e-06	0.61188	4.70734e-06
0.61432	1.90887e-06	0.61432	2.36938e-06	0.61432	2.90802e-06	0.61432	3.53699e-06	0.61432	4.74457e-06
0.61676	1.92444e-06	0.61676	2.38983e-06	0.61676	2.93427e-06	0.61676	3.56964e-06	0.61676	4.78333e-06
0.6192	1.94092e-06	0.6192	2.40906e-06	0.6192	2.95776e-06	0.6192	3.59924e-06	0.6192	4.81903e-06
0.62164	1.95587e-06	0.62164	2.43042e-06	0.62164	2.98279e-06	0.62164	3.63159e-06	0.62164	4.85657e-06
0.62408	1.97083e-06	0.62408	2.45026e-06	0.62408	3.00842e-06	0.62408	3.6615e-06	0.62408	4.8941e-06
0.62653	1.98792e-06	0.62653	2.47192e-06	0.62653	3.03375e-06	0.62653	3.69354e-06	0.62653	4.93195e-06
0.62897	2.00378e-06	0.62897	2.49298e-06	0.62897	3.05817e-06	0.62897	3.72437e-06	0.62897	4.96948e-06
0.63141	2.01935e-06	0.63141	2.51434e-06	0.63141	3.08441e-06	0.63141	3.7561e-06	0.63141	5.00671e-06
0.63385	2.03583e-06	0.63385	2.53448e-06	0.63385	3.10913e-06	0.63385	3.78754e-06	0.63385	5.04517e-06
0.63629	2.05322e-06	0.63629	2.55646e-06	0.63629	3.13477e-06	0.63629	3.81958e-06	0.63629	5.0827e-06
0.63873	2.06848e-06	0.63873	2.5766e-06	0.63873	3.15979e-06	0.63873	3.8504e-06	0.63873	5.11963e-06
0.64117	2.08466e-06	0.64117	2.59979e-06	0.64117	3.18634e-06	0.64117	3.88306e-06	0.64117	5.16022e-06
0.64362	2.10052e-06	0.64362	2.62024e-06	0.64362	3.21136e-06	0.64362	3.91449e-06	0.64362	5.19501e-06
0.64606	2.11731e-06	0.64606	2.64191e-06	0.64606	3.23822e-06	0.64606	3.94684e-06	0.64606	5.23468e-06
0.6485	2.13287e-06	0.6485	2.66144e-06	0.6485	3.26263e-06	0.6485	3.97797e-06	0.6485	5.27191e-06
0.65094	2.14783e-06	0.65094	2.68433e-06	0.65094	3.28918e-06	0.65094	4.01001e-06	0.65094	5.30975e-06
0.65338	2.16461e-06	0.65338	2.70599e-06	0.65338	3.31482e-06	0.65338	4.04175e-06	0.65338	5.3479e-06
0.65582	2.1814e-06	0.65582	2.72797e-06	0.65582	3.34137e-06	0.65582	4.07501e-06	0.65582	5.38666e-06
0.65826	2.19788e-06	0.65826	2.74811e-06	0.65826	3.36578e-06	0.65826	4.10583e-06	0.65826	5.42267e-06
0.66071	2.21405e-06	0.66071	2.77069e-06	0.66071	3.39355e-06	0.66071	4.1394e-06	0.66071	5.46265e-06
0.66315	2.229e-06	0.66315	2.79266e-06	0.66315	3.41858e-06	0.66315	4.17023e-06	0.66315	5.49835e-06
0.66559	2.24396e-06	0.66559	2.81494e-06	0.66559	3.44421e-06	0.66559	4.2038e-06	0.66559	5.5368e-06
0.66803	2.26135e-06	0.66803	2.83569e-06	0.66803	3.47046e-06	0.66803	4.23523e-06	0.66803	5.57373e-06
0.67047	2.27692e-06	0.67047	2.85736e-06	0.67047	3.49548e-06	0.67047	4.26758e-06	0.67047	5.61127e-06
0.67291	2.29309e-06	0.67291	2.87811e-06	0.67291	3.52264e-06	0.67291	4.30054e-06	0.67291	5.64728e-06
0.67535	2.30927e-06	0.67535	2.90039e-06	0.67535	3.54889e-06	0.67535	4.3335e-06	0.67535	5.68573e-06
0.6778	2.32483e-06	0.6778	2.92175e-06	0.6778	3.57391e-06	0.6778	4.36554e-06	0.6778	5.72144e-06
0.68024	2.34039e-06	0.68024	2.94373e-06	0.68024	3.60077e-06	0.68024	4.39819e-06	0.68024	5.75989e-06
0.68268	2.35504e-06	0.68268	2.96417e-06	0.68268	3.62457e-06	0.68268	4.42993e-06	0.68268	5.79651e-06
0.68512	2.37183e-06	0.68512	2.98615e-06	0.68512	3.65143e-06	0.68512	4.4635e-06	0.68512	5.83496e-06
0.68756	2.38708e-06	0.68756	3.00781e-06	0.68756	3.67615e-06	0.68756	4.49432e-06	0.68756	5.86975e-06
0.69	2.40265e-06	0.69	3.02917e-06	0.69	3.70178e-06	0.69	4.52576e-06	0.69	5.90576e-06
0.69244	2.41699e-06	0.69244	3.05023e-06	0.69244	3.7262e-06	0.69244	4.55811e-06	0.69244	5.94177e-06
0.69489	2.43286e-06	0.69489	3.07251e-06	0.69489	3.75244e-06	0.69489	4.59106e-06	0.69489	5.97809e-06
0.69733	2.44751e-06	0.69733	3.09296e-06	0.69733	3.77655e-06	0.69733	4.62189e-06	0.69733	6.01257e-06
0.69977	2.46246e-06	0.69977	3.1131e-06	0.69977	3.80127e-06	0.69977	4.65454e-06	0.69977	6.04858e-06
0.70221	2.4762e-06	0.70221	3.13416e-06	0.70221	3.82538e-06	0.70221	4.68475e-06	0.70221	6.08521e-06
0.70465	2.49207e-06	0.70465	3.15613e-06	0.70465	3.8504e-06	0.70465	4.71771e-06	0.70465	6.12183e-06
0.70709	2.50671e-06	0.70709	3.17566e-06	0.70709	3.87421e-06	0.70709	4.74884e-06	0.70709	6.15234e-06
0.70953	2.52014e-06	0.70953	3.19733e-06	0.70953	3.89771e-06	0.70953	4.78027e-06	0.70953	6.18591e-06
0.71198	2.53601e-06	0.71198	3.21716e-06	0.71198	3.92212e-06	0.71198	4.81018e-06	0.71198	6.22253e-06
0.71442	2.54883e-06	0.71442	3.23853e-06	0.71442	3.94531e-06	0.71442	4.841e-06	0.71442	6.2561e-06
0.71686	2.56256e-06	0.71686	3.25775e-06	0.71686	3.96729e-06	0.71686	4.87091e-06	0.71686	6.28662e-06
0.7193	2.57629e-06	0.7193	3.27759e-06	0.7193	3.99109e-06	0.7193	4.90295e-06	0.7193	6.32019e-06
0.72174	2.58972e-06	0.72174	3.29742e-06	0.72174	4.01306e-06	0.72174	4.93103e-06	0.72174	6.35071e-06
0.72418	2.60315e-06	0.72418	3.31696e-06	0.72418	4.03778e-06	0.72418	4.96216e-06	0.72418	6.38123e-06
0.72662	2.61597e-06	0.72662	3.33618e-06	0.72662	4.05792e-06	0.72662	4.98932e-06	0.72662	6.41174e-06
0.72906	2.62909e-06	0.72906	3.3551e-06	0.72906	4.0799e-06	0.72906	5.0177e-06	0.72906	6.44226e-06
0.73151	2.64099e-06	0.73151	3.37433e-06	0.73151	4.10065e-06	0.73151	5.04669e-06	0.73151	6.47278e-06
0.73395	2.6535e-06	0.73395	3.39325e-06	0.73395	4.12323e-06	0.73395	5.0769e-06	0.73395	6.5033e-06
0.73639	2.66602e-06	0.73639	3.41095e-06	0.73639	4.14307e-06	0.73639	5.10284e-06	0.73639	6.53076e-06
0.73883	2.67639e-06	0.73883	3.42957e-06	0.73883	4.16534e-06	0.73883	5.13214e-06	0.73883	6.55823e-06
0.74127	2.68829e-06	0.74127	3.44849e-06	0.74127	4.18427e-06	0.74127	5.15656e-06	0.74127	6.58264e-06
0.74371	2.7002e-06	0.74371	3.46497e-06	0.74371	4.2041e-06	0.74371	5.18463e-06	0.74371	6.61011e-06
0.74615	2.71027e-06	0.74615	3.48236e-06	0.74615	4.22302e-06	0.74615	5.20996e-06	0.74615	6.63757e-06
0.7486	2.72156e-06	0.7486	3.49976e-06	0.7486	4.24072e-06	0.7486	5.23651e-06	0.7486	6.66199e-06
0.75104	2.73041e-06	0.75104	3.51654e-06	0.75104	4.26025e-06	0.75104	5.26123e-06	0.75104	6.6864e-06
0.75348	2.742e-06	0.75348	3.53302e-06	0.75348	4.27917e-06	0.75348	5.28748e-06	0.75348	6.71082e-06
0.75592	2.75055e-06	0.75592	3.54797e-06	0.75592	4.29474e-06	0.75592	5.31067e-06	0.75592	6.73218e-06
0.75836	2.76062e-06	0.75836	3.56415e-06	0.75836	4.31274e-06	0.75836	5.336e-06	0.75836	6.75354e-06
0.7608	2.76886e-06	0.7608	3.57849e-06	0.7608	4.32831e-06	0.7608	5.35828e-06	0.7608	6.7749e-06
0.76324	2.77985e-06	0.76324	3.59406e-06	0.76324	4.3454e-06	0.76324	5.38147e-06	0.76324	6.79626e-06
0.76569	2.78564e-06	0.76569	3.6084e-06	0.76569	4.36157e-06	0.76569	5.40222e-06	0.76569	6.81152e-06
0.76813	2.79327e-06	0.76813	3.62213e-06	0.76813	4.37408e-06	0.76813	5.4245e-06	0.76813	6.82983e-06
0.77057	2.8009e-06	0.77057	3.63525e-06	0.77057	4.38873e-06	0.77057	5.44525e-06	0.77057	6.84814e-06
0.77301	2.80914e-06	0.77301	3.65021e-06	0.77301	4.40399e-06	0.77301	5.46692e-06	0.77301	6.86646e-06
0.77545	2.81494e-06	0.77545	3.6618e-06	0.77545	4.41528e-06	0.77545	5.4837e-06	0.77545	6.87866e-06
0.77789	2.82196e-06	0.77789	3.67493e-06	0.77789	4.42902e-06	0.77789	5.50446e-06	0.77789	6.89392e-06
0.78033	2.82623e-06	0.78033	3.68561e-06	0.78033	4.4397e-06	0.78033	5.52185e-06	0.78033	6.90613e-06
0.78278	2.83264e-06	0.78278	3.69568e-06	0.78278	4.4519e-06	0.78278	5.53864e-06	0.78278	6.91833e-06
0.78522	2.83661e-06	0.78522	3.70667e-06	0.78522	4.46136e-06	0.78522	5.5545e-06	0.78522	6.93054e-06
0.78766	2.84088e-06	0.78766	3.71765e-06	0.78766	4.46991e-06	0.78766	5.56976e-06	0.78766	6.9397e-06
0.7901	2.84576e-06	0.7901	3.7265e-06	0.7901	4.47937e-06	0.7901	5.58502e-06	0.7901	6.9458e-06
0.79254	2.84912e-06	0.79254	3.73627e-06	0.79254	4.48669e-06	0.79254	5.59967e-06	0.79254	6.95496e-06
0.79498	2.85187e-06	0.79498	3.74481e-06	0.79498	4.49402e-06	0.79498	5.61096e-06	0.79498	6.96106e-06
0.79742	2.85522e-06	0.79742	3.75275e-06	0.79742	4.50073e-06	0.79742	5.62439e-06	0.79742	6.96716e-06
0.79987	2.85645e-06	0.79987	3.75885e-06	0.79987	4.50562e-06	0.79987	5.63538e-06	0.79987	6.97021e-06
0.80231	2.85858e-06	0.80231	3.76617e-06	0.80231	4.51141e-06	0.80231	5.64636e-06	0.80231	6.97327e-06
0.80475	2.86041e-06	0.80475	3.77167e-06	0.80475	4.51477e-06	0.80475	5.65338e-06	0.80475	6.97327e-06
0.80719	2.8598e-06	0.80719	3.77777e-06	0.80719	4.51782e-06	0.80719	5.66254e-06	0.80719	6.97327e-06
0.80963	2.85919e-06	0.80963	3.78235e-06	0.80963	4.52087e-06	0.80963	5.66986e-06	0.80963	6.97327e-06
0.81207	2.86041e-06	0.81207	3.78754e-06	0.81207	4.52362e-06	0.81207	5.6778e-06	0.81207	6.97021e-06
0.81451	2.8595e-06	0.81451	3.78967e-06	0.81451	4.52301e-06	0.81451	5.68054e-06	0.81451	6.96411e-06
0.81696	2.85858e-06	0.81696	3.79333e-06	0.81696	4.52362e-06	0.81696	5.68512e-06	0.81696	6.96106e-06
0.8194	2.85583e-06	0.8194	3.79425e-06	0.8194	4.52209e-06	0.8194	5.68726e-06	0.8194	6.95496e-06
0.82184	2.85339e-06	0.82184	3.79669e-06	0.82184	4.52118e-06	0.82184	5.6897e-06	0.82184	6.9458e-06
0.82428	2.85095e-06	0.82428	3.79822e-06	0.82428	4.51782e-06	0.82428	5.68878e-06	0.82428	6.93665e-06
0.82672	2.8479e-06	0.82672	3.7973e-06	0.82672	4.51385e-06	0.82672	5.6897e-06	0.82672	6.92749e-06
0.82916	2.84424e-06	0.82916	3.797e-06	0.82916	4.50928e-06	0.82916	5.68726e-06	0.82916	6.91528e-06
0.8316	2.84027e-06	0.8316	3.79608e-06	0.8316	4.5047e-06	0.8316	5.68542e-06	0.8316	6.90308e-06
0.83405	2.83447e-06	0.83405	3.79333e-06	0.83405	4.49951e-06	0.83405	5.68085e-06	0.83405	6.88782e-06
0.83649	2.82959e-06	0.83649	3.79089e-06	0.83649	4.49249e-06	0.83649	5.67719e-06	0.83649	6.87256e-06
0.83893	2.82532e-06	0.83893	3.78784e-06	0.83893	4.48425e-06	0.83893	5.66986e-06	0.83893	6.85425e-06
0.84137	2.81891e-06	0.84137	3.78357e-06	0.84137	4.47632e-06	0.84137	5.66406e-06	0.84137	6.83899e-06
0.84381	2.81097e-06	0.84381	3.77838e-06	0.84381	4.46625e-06	0.84381	5.65399e-06	0.84381	6.81763e-06
0.84625	2.80487e-06	0.84625	3.77289e-06	0.84625	4.45648e-06	0.84625	5.64453e-06	0.84625	6.79932e-06
0.84869	2.79907e-06	0.84869	3.7677e-06	0.84869	4.4458e-06	0.84869	5.63354e-06	0.84869	6.78101e-06
0.85114	2.79114e-06	0.85114	3.76007e-06	0.85114	4.43481e-06	0.85114	5.62347e-06	0.85114	6.75964e-06
0.85358	2.78259e-06	0.85358	3.75214e-06	0.85358	4.42169e-06	0.85358	5.61096e-06	0.85358	6.73523e-06
0.85602	2.77527e-06	0.85602	3.74573e-06	0.85602	4.4101e-06	0.85602	5.59662e-06	0.85602	6.71082e-06
0.85846	2.76581e-06	0.85846	3.73596e-06	0.85846	4.39575e-06	0.85846	5.58105e-06	0.85846	6.68945e-06
0.8609	2.75818e-06	0.8609	3.72772e-06	0.8609	4.38141e-06	0.8609	5.56549e-06	0.8609	6.66504e-06
0.86334	2.74811e-06	0.86334	3.71674e-06	0.86334	4.36615e-06	0.86334	5.54901e-06	0.86334	6.63757e-06
0.86578	2.73987e-06	0.86578	3.70636e-06	0.86578	4.35089e-06	0.86578	5.53192e-06	0.86578	6.61316e-06
0.86823	2.73163e-06	0.86823	3.69568e-06	0.86823	4.33563e-06	0.86823	5.51331e-06	0.86823	6.58569e-06
0.87067	2.72278e-06	0.87067	3.68591e-06	0.87067	4.32129e-06	0.87067	5.495e-06	0.87067	6.55823e-06
0.87311	2.71149e-06	0.87311	3.67218e-06	0.87311	4.30359e-06	0.87311	5.47424e-06	0.87311	6.53076e-06
0.87555	2.70386e-06	0.87555	3.65997e-06	0.87555	4.28802e-06	0.87555	5.4541e-06	0.87555	6.5033e-06
0.87799	2.69287e-06	0.87799	3.64777e-06	0.87799	4.27063e-06	0.87799	5.43274e-06	0.87799	6.47888e-06
0.88043	2.68463e-06	0.88043	3.63525e-06	0.88043	4.25262e-06	0.88043	5.41107e-06	0.88043	6.44836e-06
0.88287	2.67426e-06	0.88287	3.62122e-06	0.88287	4.23492e-06	0.88287	5.38788e-06	0.88287	6.4209e-06
0.88531	2.66479e-06	0.88531	3.6084e-06	0.88531	4.21783e-06	0.88531	5.36469e-06	0.88531	6.39038e-06
0.88776	2.65594e-06	0.88776	3.59406e-06	0.88776	4.20044e-06	0.88776	5.34149e-06	0.88776	6.36292e-06
0.8902	2.64648e-06	0.8902	3.58002e-06	0.8902	4.18365e-06	0.8902	5.31891e-06	0.8902	6.33545e-06
0.89264	2.63641e-06	0.89264	3.56506e-06	0.89264	4.16412e-06	0.89264	5.29419e-06	0.89264	6.30493e-06
0.89508	2.62787e-06	0.89508	3.55164e-06	0.89508	4.14764e-06	0.89508	5.271e-06	0.89508	6.27747e-06
0.89752	2.61749e-06	0.89752	3.53699e-06	0.89752	4.12872e-06	0.89752	5.24628e-06	0.89752	6.24695e-06
0.89996	2.60742e-06	0.89996	3.52325e-06	0.89996	4.11072e-06	0.89996	5.22217e-06	0.89996	6.21948e-06
0.9024	2.59857e-06	0.9024	3.5083e-06	0.9024	4.09393e-06	0.9024	5.19653e-06	0.9024	6.19202e-06
0.90485	2.58942e-06	0.90485	3.49304e-06	0.90485	4.07623e-06	0.90485	5.17334e-06	0.90485	6.1615e-06
0.90729	2.58087e-06	0.90729	3.47778e-06	0.90729	4.05792e-06	0.90729	5.14801e-06	0.90729	6.13403e-06
0.90973	2.57233e-06	0.90973	3.46497e-06	0.90973	4.04022e-06	0.90973	5.1236e-06	0.90973	6.10657e-06
0.91217	2.56378e-06	0.91217	3.4491e-06	0.91217	4.02283e-06	0.91217	5.09979e-06	0.91217	6.0791e-06
0.91461	2.55493e-06	0.91461	3.43536e-06	0.91461	4.00513e-06	0.91461	5.07477e-06	0.91461	6.05164e-06
0.91705	2.54578e-06	0.91705	3.4201e-06	0.91705	3.98743e-06	0.91705	5.05035e-06	0.91705	6.02417e-06
0.91949	2.53845e-06	0.91949	3.40515e-06	0.91949	3.97064e-06	0.91949	5.02563e-06	0.91949	5.99976e-06
0.92194	2.53052e-06	0.92194	3.39081e-06	0.92194	3.95294e-06	0.92194	5.00275e-06	0.92194	5.97229e-06
0.92438	2.52136e-06	0.92438	3.37738e-06	0.92438	3.93616e-06	0.92438	4.97864e-06	0.92438	5.94482e-06
0.92682	2.51312e-06	0.92682	3.36304e-06	0.92682	3.91846e-06	0.92682	4.95453e-06	0.92682	5.91736e-06
0.92926	2.5058e-06	0.92926	3.34991e-06	0.92926	3.90228e-06	0.92926	4.93256e-06	0.92926	5.89294e-06
0.9317	2.49817e-06	0.9317	3.33588e-06	0.9317	3.88611e-06	0.9317	4.90753e-06	0.9317	5.86548e-06
0.93414	2.49023e-06	0.93414	3.32306e-06	0.93414	3.86963e-06	0.93414	4.88647e-06	0.93414	5.84106e-06
0.93658	2.48199e-06	0.93658	3.30933e-06	0.93658	3.85284e-06	0.93658	4.86267e-06	0.93658	5.81665e-06
0.93903	2.47528e-06	0.93903	3.29681e-06	0.93903	3.83545e-06	0.93903	4.84161e-06	0.93903	5.79224e-06
0.94147	2.46857e-06	0.94147	3.28491e-06	0.94147	3.8205e-06	0.94147	4.81812e-06	0.94147	5.76782e-06
0.94391	2.46124e-06	0.94391	3.27118e-06	0.94391	3.80524e-06	0.94391	4.79706e-06	0.94391	5.74341e-06
0.94635	2.45422e-06	0.94635	3.25867e-06	0.94635	3.79059e-06	0.94635	4.77478e-06	0.94635	5.72205e-06
0.94879	2.44843e-06	0.94879	3.24554e-06	0.94879	3.77563e-06	0.94879	4.75372e-06	0.94879	5.69763e-06
0.95123	2.4411e-06	0.95123	3.23273e-06	0.95123	3.75977e-06	0.95123	4.73297e-06	0.95123	5.67322e-06
0.95367	2.4353e-06	0.95367	3.22174e-06	0.95367	3.74603e-06	0.95367	4.71313e-06	0.95367	5.65186e-06
0.95612	2.42798e-06	0.95612	3.20892e-06	0.95612	3.73077e-06	0.95612	4.69269e-06	0.95612	5.63049e-06
0.95856	2.42279e-06	0.95856	3.19733e-06	0.95856	3.71552e-06	0.95856	4.67285e-06	0.95856	5.60913e-06
0.961	2.41516e-06	0.961	3.18695e-06	0.961	3.70239e-06	0.961	4.6524e-06	0.961	5.58472e-06
0.96344	2.40936e-06	0.96344	3.17444e-06	0.96344	3.68744e-06	0.96344	4.63318e-06	0.96344	5.56641e-06
0.96588	2.40356e-06	0.96588	3.16284e-06	0.96588	3.67493e-06	0.96588	4.61365e-06	0.96588	5.54199e-06
0.96832	2.39777e-06	0.96832	3.15216e-06	0.96832	3.66058e-06	0.96832	4.59534e-06	0.96832	5.52368e-06
0.97076	2.39105e-06	0.97076	3.14209e-06	0.97076	3.64685e-06	0.97076	4.57611e-06	0.97076	5.50232e-06
0.97321	2.38647e-06	0.97321	3.12988e-06	0.97321	3.63464e-06	0.97321	4.55841e-06	0.97321	5.48401e-06
0.97565	2.38068e-06	0.97565	3.12073e-06	0.97565	3.62122e-06	0.97565	4.54041e-06	0.97565	5.46265e-06
0.97809	2.37396e-06	0.97809	3.10913e-06	0.97809	3.60718e-06	0.97809	4.52148e-06	0.97809	5.44434e-06
0.98053	2.36877e-06	0.98053	3.09937e-06	0.98053	3.59589e-06	0.98053	4.50439e-06	0.98053	5.42297e-06
0.98297	2.36328e-06	0.98297	3.08899e-06	0.98297	3.58398e-06	0.98297	4.48669e-06	0.98297	5.40466e-06
0.98541	2.3587e-06	0.98541	3.07983e-06	0.98541	3.57147e-06	0.98541	4.47083e-06	0.98541	5.38635e-06
0.98785	2.35413e-06	0.98785	3.07098e-06	0.98785	3.55896e-06	0.98785	4.45465e-06	0.98785	5.37109e-06
0.9903	2.34894e-06	0.9903	3.06e-06	0.9903	3.54645e-06	0.9903	4.43695e-06	0.9903	5.34973e-06
0.99274	2.34375e-06	0.99274	3.05206e-06	0.99274	3.53455e-06	0.99274	4.42108e-06	0.99274	5.33447e-06
0.99518	2.34009e-06	0.99518	3.04169e-06	0.99518	3.52295e-06	0.99518	4.40521e-06	0.99518	5.31616e-06
0.99762	2.33459e-06	0.99762	3.03375e-06	0.99762	3.51257e-06	0.99762	4.38873e-06	0.99762	5.29785e-06
1.00006	2.32971e-06	1.00006	3.02338e-06	1.00006	3.50067e-06	1.00006	4.37347e-06	1.00006	5.28259e-06
1.0025	2.32422e-06	1.0025	3.01483e-06	1.0025	3.48907e-06	1.0025	4.3576e-06	1.0025	5.26428e-06
1.00494	2.31934e-06	1.00494	3.00598e-06	1.00494	3.479e-06	1.00494	4.34296e-06	1.00494	5.24902e-06
1.00739	2.31598e-06	1.00739	2.99713e-06	1.00739	3.46741e-06	1.00739	4.32739e-06	1.00739	5.23376e-06
1.00983	2.3111e-06	1.00983	2.98859e-06	1.00983	3.45703e-06	1.00983	4.31305e-06	1.00983	5.21545e-06
1.01227	2.30743e-06	1.01227	2.97913e-06	1.01227	3.44574e-06	1.01227	4.29932e-06	1.01227	5.2002e-06
1.01471	2.30225e-06	1.01471	2.97058e-06	1.01471	3.43597e-06	1.01471	4.28406e-06	1.01471	5.18494e-06
1.01715	2.29919e-06	1.01715	2.96112e-06	1.01715	3.4256e-06	1.01715	4.27032e-06	1.01715	5.16968e-06
1.01959	2.29462e-06	1.01959	2.95288e-06	1.01959	3.41614e-06	1.01959	4.25568e-06	1.01959	5.15442e-06
1.02203	2.29095e-06	1.02203	2.94434e-06	1.02203	3.40515e-06	1.02203	4.24225e-06	1.02203	5.13611e-06
1.02448	2.28668e-06	1.02448	2.93732e-06	1.02448	3.39478e-06	1.02448	4.22791e-06	1.02448	5.1239e-06
1.02692	2.28302e-06	1.02692	2.92999e-06	1.02692	3.38531e-06	1.02692	4.21722e-06	1.02692	5.11169e-06
1.02936	2.27844e-06	1.02936	2.92175e-06	1.02936	3.37585e-06	1.02936	4.20258e-06	1.02936	5.09644e-06
1.0318	2.27539e-06	1.0318	2.91412e-06	1.0318	3.36639e-06	1.0318	4.18976e-06	1.0318	5.08118e-06
1.03424	2.27112e-06	1.03424	2.9068e-06	1.03424	3.35602e-06	1.03424	4.17603e-06	1.03424	5.06592e-06
1.03668	2.26837e-06	1.03668	2.90039e-06	1.03668	3.34778e-06	1.03668	4.16321e-06	1.03668	5.05371e-06
1.03912	2.26379e-06	1.03912	2.89185e-06	1.03912	3.33862e-06	1.03912	4.15039e-06	1.03912	5.03845e-06
1.04156	2.26074e-06	1.04156	2.88544e-06	1.04156	3.32916e-06	1.04156	4.13818e-06	1.04156	5.02625e-06
1.04401	2.25739e-06	1.04401	2.87903e-06	1.04401	3.3194e-06	1.04401	4.12628e-06	1.04401	5.01404e-06
1.04645	2.25555e-06	1.04645	2.87201e-06	1.04645	3.31116e-06	1.04645	4.11377e-06	1.04645	5.00183e-06
1.04889	2.25098e-06	1.04889	2.86591e-06	1.04889	3.30139e-06	1.04889	4.10187e-06	1.04889	4.98962e-06
1.05133	2.24945e-06	1.05133	2.85919e-06	1.05133	3.29346e-06	1.05133	4.09119e-06	1.05133	4.97742e-06
1.05377	2.24518e-06	1.05377	2.85309e-06	1.05377	3.28461e-06	1.05377	4.07837e-06	1.05377	4.96216e-06
1.05621	2.24274e-06	1.05621	2.84607e-06	1.05621	3.27698e-06	1.05621	4.06769e-06	1.05621	4.94995e-06
1.05865	2.2403e-06	1.05865	2.83966e-06	1.05865	3.26691e-06	1.05865	4.05579e-06	1.05865	4.93774e-06
1.0611	2.23816e-06	1.0611	2.83386e-06	1.0611	3.25958e-06	1.0611	4.0451e-06	1.0611	4.92493e-06
1.06354	2.23572e-06	1.06354	2.82776e-06	1.06354	3.25195e-06	1.06354	4.03442e-06	1.06354	4.91302e-06
1.06598	2.23267e-06	1.06598	2.82135e-06	1.06598	3.24341e-06	1.06598	4.02344e-06	1.06598	4.90204e-06
1.06842	2.22961e-06	1.06842	2.81586e-06	1.06842	3.23578e-06	1.06842	4.01184e-06	1.06842	4.89075e-06
1.07086	2.22809e-06	1.07086	2.81067e-06	1.07086	3.22845e-06	1.07086	4.00208e-06	1.07086	4.88037e-06
1.0733	2.22534e-06	1.0733	2.80457e-06	1.0733	3.22052e-06	1.0733	3.99078e-06	1.0733	4.86786e-06
1.07574	2.2229e-06	1.07574	2.79968e-06	1.07574	3.21289e-06	1.07574	3.98102e-06	1.07574	4.85809e-06
1.07819	2.22046e-06	1.07819	2.79297e-06	1.07819	3.20618e-06	1.07819	3.97034e-06	1.07819	4.8468e-06
1.08063	2.21924e-06	1.08063	2.78778e-06	1.08063	3.20007e-06	1.08063	3.96057e-06	1.08063	4.83673e-06
1.08307	2.21741e-06	1.08307	2.78198e-06	1.08307	3.19305e-06	1.08307	3.94928e-06	1.08307	4.82849e-06
1.08551	2.21619e-06	1.08551	2.7771e-06	1.08551	3.18726e-06	1.08551	3.94043e-06	1.08551	4.81873e-06
1.08795	2.21405e-06	1.08795	2.77039e-06	1.08795	3.17871e-06	1.08795	3.93158e-06	1.08795	4.80804e-06
1.09039	2.21313e-06	1.09039	2.76611e-06	1.09039	3.17352e-06	1.09039	3.92151e-06	1.09039	4.7995e-06
1.09283	2.21039e-06	1.09283	2.76184e-06	1.09283	3.1662e-06	1.09283	3.91235e-06	1.09283	4.79156e-06
1.09528	2.20917e-06	1.09528	2.75635e-06	1.09528	3.16162e-06	1.09528	3.9035e-06	1.09528	4.78271e-06
1.09772	2.20764e-06	1.09772	2.75116e-06	1.09772	3.15521e-06	1.09772	3.89404e-06	1.09772	4.77478e-06
1.10016	2.20703e-06	1.10016	2.74567e-06	1.10016	3.1488e-06	1.10016	3.88428e-06	1.10016	4.76746e-06
1.1026	2.20581e-06	1.1026	2.7417e-06	1.1026	3.14331e-06	1.1026	3.87756e-06	1.1026	4.76074e-06
1.10504	2.2052e-06	1.10504	2.73773e-06	1.10504	3.13812e-06	1.10504	3.86963e-06	1.10504	4.75342e-06
1.10748	2.20337e-06	1.10748	2.73254e-06	1.10748	3.13293e-06	1.10748	3.86139e-06	1.10748	4.74579e-06
1.10992	2.20337e-06	1.10992	2.73163e-06	1.10992	3.12805e-06	1.10992	3.85376e-06	1.10992	4.73969e-06
1.11237	2.20093e-06	1.11237	2.72552e-06	1.11237	3.12225e-06	1.11237	3.84644e-06	1.11237	4.73267e-06
1.11481	2.20154e-06	1.11481	2.72278e-06	1.11481	3.11951e-06	1.11481	3.83942e-06	1.11481	4.72748e-06
1.11725	2.20032e-06	1.11725	2.71729e-06	1.11725	3.11371e-06	1.11725	3.8327e-06	1.11725	4.72107e-06
1.11969	2.20093e-06	1.11969	2.71301e-06	1.11969	3.10974e-06	1.11969	3.82751e-06	1.11969	4.71558e-06
1.12213	2.20062e-06	1.12213	2.7121e-06	1.12213	3.10425e-06	1.12213	3.8208e-06	1.12213	4.71039e-06
1.12457	2.20062e-06	1.12457	2.70782e-06	1.12457	3.10089e-06	1.12457	3.81531e-06	1.12457	4.70551e-06
1.12701	2.20032e-06	1.12701	2.70325e-06	1.12701	3.09784e-06	1.12701	3.8089e-06	1.12701	4.70154e-06
1.12946	2.20032e-06	1.12946	2.70142e-06	1.12946	3.09357e-06	1.12946	3.80432e-06	1.12946	4.69666e-06
1.1319	2.20093e-06	1.1319	2.69867e-06	1.1319	3.0899e-06	1.1319	3.79822e-06	1.1319	4.69269e-06
1.13434	2.20184e-06	1.13434	2.69745e-06	1.13434	3.08655e-06	1.13434	3.79456e-06	1.13434	4.68994e-06
1.13678	2.20154e-06	1.13678	2.69318e-06	1.13678	3.0835e-06	1.13678	3.78876e-06	1.13678	4.68628e-06
1.13922	2.20306e-06	1.13922	2.69073e-06	1.13922	3.08105e-06	1.13922	3.7854e-06	1.13922	4.68292e-06
1.14166	2.20428e-06	1.14166	2.6886e-06	1.14166	3.07953e-06	1.14166	3.78082e-06	1.14166	4.68079e-06
1.1441	2.20581e-06	1.1441	2.6886e-06	1.1441	3.07892e-06	1.1441	3.77686e-06	1.1441	4.67896e-06
1.14655	2.20612e-06	1.14655	2.68555e-06	1.14655	3.07709e-06	1.14655	3.77319e-06	1.14655	4.6756e-06
1.14899	2.20764e-06	1.14899	2.68494e-06	1.14899	3.07526e-06	1.14899	3.76923e-06	1.14899	4.67377e-06
1.15143	2.20795e-06	1.15143	2.68311e-06	1.15143	3.07434e-06	1.15143	3.76587e-06	1.15143	4.67285e-06
1.15387	2.211e-06	1.15387	2.68311e-06	1.15387	3.07465e-06	1.15387	3.76312e-06	1.15387	4.67133e-06
1.15631	2.21252e-06	1.15631	2.68097e-06	1.15631	3.07343e-06	1.15631	3.75946e-06	1.15631	4.67133e-06
1.15875	2.21436e-06	1.15875	2.68127e-06	1.15875	3.07343e-06	1.15875	3.75671e-06	1.15875	4.67041e-06
1.16119	2.21649e-06	1.16119	2.68097e-06	1.16119	3.0722e-06	1.16119	3.75519e-06	1.16119	4.67041e-06
1.16364	2.21924e-06	1.16364	2.68036e-06	1.16364	3.07251e-06	1.16364	3.75305e-06	1.16364	4.67255e-06
1.16608	2.2226e-06	1.16608	2.67883e-06	1.16608	3.07312e-06	1.16608	3.75061e-06	1.16608	4.67285e-06
1.16852	2.22504e-06	1.16852	2.68066e-06	1.16852	3.07404e-06	1.16852	3.75e-06	1.16852	4.67407e-06
1.17096	2.22717e-06	1.17096	2.67944e-06	1.17096	3.07373e-06	1.17096	3.74817e-06	1.17096	4.6756e-06
1.1734	2.22992e-06	1.1734	2.68036e-06	1.1734	3.07434e-06	1.1734	3.74756e-06	1.1734	4.67712e-06
1.17584	2.23389e-06	1.17584	2.68158e-06	1.17584	3.07587e-06	1.17584	3.74542e-06	1.17584	4.67834e-06
1.17828	2.23694e-06	1.17828	2.6825e-06	1.17828	3.07709e-06	1.17828	3.74603e-06	1.17828	4.68231e-06
1.18073	2.2403e-06	1.18073	2.68341e-06	1.18073	3.07983e-06	1.18073	3.74603e-06	1.18073	4.68628e-06
1.18317	2.24426e-06	1.18317	2.68646e-06	1.18317	3.08136e-06	1.18317	3.74603e-06	1.18317	4.69025e-06
1.18561	2.24945e-06	1.18561	2.68707e-06	1.18561	3.08197e-06	1.18561	3.74634e-06	1.18561	4.69208e-06
1.18805	2.25281e-06	1.18805	2.68829e-06	1.18805	3.08563e-06	1.18805	3.74786e-06	1.18805	4.69696e-06
1.19049	2.25677e-06	1.19049	2.69043e-06	1.19049	3.08746e-06	1.19049	3.74786e-06	1.19049	4.70215e-06
1.19293	2.26135e-06	1.19293	2.69318e-06	1.19293	3.0899e-06	1.19293	3.75061e-06	1.19293	4.70795e-06
1.19537	2.26593e-06	1.19537	2.6947e-06	1.19537	3.09326e-06	1.19537	3.75183e-06	1.19537	4.71222e-06
1.19781	2.27142e-06	1.19781	2.69806e-06	1.19781	3.0957e-06	1.19781	3.75458e-06	1.19781	4.71771e-06
1.20026	2.276e-06	1.20026	2.70111e-06	1.20026	3.10059e-06	1.20026	3.75702e-06	1.20026	4.72473e-06
1.2027	2.28058e-06	1.2027	2.70325e-06	1.2027	3.10516e-06	1.2027	3.76007e-06	1.2027	4.73267e-06
1.20514	2.28607e-06	1.20514	2.7066e-06	1.20514	3.10852e-06	1.20514	3.76282e-06	1.20514	4.73755e-06
1.20758	2.29279e-06	1.20758	2.71118e-06	1.20758	3.11371e-06	1.20758	3.76526e-06	1.20758	4.74792e-06
1.21002	2.29767e-06	1.21002	2.71423e-06	1.21002	3.11829e-06	1.21002	3.76923e-06	1.21002	4.75403e-06
1.21246	2.30377e-06	1.21246	2.71851e-06	1.21246	3.12347e-06	1.21246	3.77258e-06	1.21246	4.76257e-06
1.2149	2.31079e-06	1.2149	2.72308e-06	1.2149	3.12775e-06	1.2149	3.77716e-06	1.2149	4.7702e-06
1.21735	2.31598e-06	1.21735	2.72705e-06	1.21735	3.13354e-06	1.21735	3.78204e-06	1.21735	4.77997e-06
1.21979	2.32239e-06	1.21979	2.73102e-06	1.21979	3.13812e-06	1.21979	3.78662e-06	1.21979	4.79004e-06
1.22223	2.32971e-06	1.22223	2.73743e-06	1.22223	3.14575e-06	1.22223	3.79211e-06	1.22223	4.80194e-06
1.22467	2.33704e-06	1.22467	2.74261e-06	1.22467	3.15094e-06	1.22467	3.79791e-06	1.22467	4.81049e-06
1.22711	2.34375e-06	1.22711	2.74841e-06	1.22711	3.15796e-06	1.22711	3.80463e-06	1.22711	4.82269e-06
1.22955	2.35199e-06	1.22955	2.7533e-06	1.22955	3.16437e-06	1.22955	3.80981e-06	1.22955	4.83459e-06
1.23199	2.35962e-06	1.23199	2.7594e-06	1.23199	3.16986e-06	1.23199	3.81836e-06	1.23199	4.84741e-06
1.23444	2.36755e-06	1.23444	2.7655e-06	1.23444	3.17902e-06	1.23444	3.82446e-06	1.23444	4.8587e-06
1.23688	2.37579e-06	1.23688	2.77283e-06	1.23688	3.18573e-06	1.23688	3.83148e-06	1.23688	4.87091e-06
1.23932	2.38373e-06	1.23932	2.77954e-06	1.23932	3.1958e-06	1.23932	3.84033e-06	1.23932	4.88647e-06
1.24176	2.39258e-06	1.24176	2.78748e-06	1.24176	3.20404e-06	1.24176	3.84918e-06	1.24176	4.90204e-06
1.2442	2.40204e-06	1.2442	2.79449e-06	1.2442	3.21106e-06	1.2442	3.85651e-06	1.2442	4.91547e-06
1.24664	2.4118e-06	1.24664	2.80334e-06	1.24664	3.22205e-06	1.24664	3.86658e-06	1.24664	4.93225e-06
1.24908	2.42096e-06	1.24908	2.80884e-06	1.24908	3.23059e-06	1.24908	3.87482e-06	1.24908	4.94751e-06
1.25153	2.43164e-06	1.25153	2.8186e-06	1.25153	3.24005e-06	1.25153	3.88519e-06	1.25153	4.96429e-06
1.25397	2.43927e-06	1.25397	2.82684e-06	1.25397	3.24921e-06	1.25397	3.89435e-06	1.25397	4.98077e-06
1.25641	2.45087e-06	1.25641	2.83661e-06	1.25641	3.25989e-06	1.25641	3.90564e-06	1.25641	4.99786e-06
1.25885	2.46063e-06	1.25885	2.84515e-06	1.25885	3.27026e-06	1.25885	3.91571e-06	1.25885	5.01617e-06
1.26129	2.47162e-06	1.26129	2.85461e-06	1.26129	3.28217e-06	1.26129	3.927e-06	1.26129	5.0351e-06
1.26373	2.48169e-06	1.26373	2.86285e-06	1.26373	3.29285e-06	1.26373	3.9389e-06	1.26373	5.05432e-06
1.26617	2.49359e-06	1.26617	2.87445e-06	1.26617	3.30383e-06	1.26617	3.95142e-06	1.26617	5.07477e-06
1.26862	2.50214e-06	1.26862	2.88422e-06	1.26862	3.31665e-06	1.26862	3.96393e-06	1.26862	5.0946e-06
1.27106	2.51556e-06	1.27106	2.89612e-06	1.27106	3.32916e-06	1.27106	3.97705e-06	1.27106	5.11597e-06
1.2735	2.52563e-06	1.2735	2.90588e-06	1.2735	3.34137e-06	1.2735	3.99017e-06	1.2735	5.13702e-06
1.27594	2.53723e-06	1.27594	2.91626e-06	1.27594	3.35419e-06	1.27594	4.00391e-06	1.27594	5.15991e-06
1.27838	2.54944e-06	1.27838	2.92877e-06	1.27838	3.36884e-06	1.27838	4.01855e-06	1.27838	5.18219e-06
1.28082	2.56256e-06	1.28082	2.9422e-06	1.28082	3.38318e-06	1.28082	4.03503e-06	1.28082	5.20599e-06
1.28326	2.57416e-06	1.28326	2.95319e-06	1.28326	3.39844e-06	1.28326	4.04816e-06	1.28326	5.22919e-06
1.28571	2.58881e-06	1.28571	2.96692e-06	1.28571	3.41461e-06	1.28571	4.06616e-06	1.28571	5.25269e-06
1.28815	2.60193e-06	1.28815	2.97882e-06	1.28815	3.42957e-06	1.28815	4.08142e-06	1.28815	5.27802e-06
1.29059	2.61444e-06	1.29059	2.99194e-06	1.29059	3.44543e-06	1.29059	4.09607e-06	1.29059	5.30334e-06
1.29303	2.6297e-06	1.29303	3.00598e-06	1.29303	3.461e-06	1.29303	4.1156e-06	1.29303	5.32776e-06
1.29547	2.64465e-06	1.29547	3.02063e-06	1.29547	3.47778e-06	1.29547	4.1333e-06	1.29547	5.354e-06
1.29791	2.65869e-06	1.29791	3.03467e-06	1.29791	3.49518e-06	1.29791	4.15192e-06	1.29791	5.38116e-06
1.30035	2.67548e-06	1.30035	3.05023e-06	1.30035	3.51288e-06	1.30035	4.17175e-06	1.30035	5.40955e-06
1.3028	2.68921e-06	1.3028	3.06335e-06	1.3028	3.53088e-06	1.3028	4.18884e-06	1.3028	5.43793e-06
1.30524	2.70447e-06	1.30524	3.07983e-06	1.30524	3.5495e-06	1.30524	4.20929e-06	1.30524	5.46753e-06
1.30768	2.72278e-06	1.30768	3.09479e-06	1.30768	3.56628e-06	1.30768	4.22882e-06	1.30768	5.49561e-06
1.31012	2.73834e-06	1.31012	3.11066e-06	1.31012	3.58673e-06	1.31012	4.25171e-06	1.31012	5.52734e-06
1.31256	2.75482e-06	1.31256	3.12714e-06	1.31256	3.60626e-06	1.31256	4.27155e-06	1.31256	5.55847e-06
1.315	2.7713e-06	1.315	3.14423e-06	1.315	3.62701e-06	1.315	4.29382e-06	1.315	5.58899e-06
1.31744	2.7887e-06	1.31744	3.16162e-06	1.31744	3.64807e-06	1.31744	4.31488e-06	1.31744	5.62164e-06
1.31989	2.80731e-06	1.31989	3.17993e-06	1.31989	3.66852e-06	1.31989	4.33838e-06	1.31989	5.65704e-06
1.32233	2.82593e-06	1.32233	3.19733e-06	1.32233	3.68805e-06	1.32233	4.36127e-06	1.32233	5.69061e-06
1.32477	2.84393e-06	1.32477	3.21594e-06	1.32477	3.71124e-06	1.32477	4.38599e-06	1.32477	5.7254e-06
1.32721	2.86194e-06	1.32721	3.23395e-06	1.32721	3.7326e-06	1.32721	4.4101e-06	1.32721	5.76111e-06
1.32965	2.88147e-06	1.32965	3.25409e-06	1.32965	3.75549e-06	1.32965	4.43451e-06	1.32965	5.79742e-06
1.33209	2.9007e-06	1.33209	3.27301e-06	1.33209	3.77716e-06	1.33209	4.45984e-06	1.33209	5.83221e-06
1.33453	2.91931e-06	1.33453	3.29163e-06	1.33453	3.80157e-06	1.33453	4.48669e-06	1.33453	5.86975e-06
1.33698	2.93854e-06	1.33698	3.31329e-06	1.33698	3.82538e-06	1.33698	4.51355e-06	1.33698	5.90759e-06
1.33942	2.96112e-06	1.33942	3.33435e-06	1.33942	3.8504e-06	1.33942	4.53979e-06	1.33942	5.94604e-06
1.34186	2.98004e-06	1.34186	3.3548e-06	1.34186	3.87604e-06	1.34186	4.56726e-06	1.34186	5.98389e-06
1.3443	3.0014e-06	1.3443	3.37585e-06	1.3443	3.90045e-06	1.3443	4.59686e-06	1.3443	6.02386e-06
1.34674	3.02185e-06	1.34674	3.39813e-06	1.34674	3.92731e-06	1.34674	4.62372e-06	1.34674	6.06384e-06
1.34918	3.04474e-06	1.34918	3.42041e-06	1.34918	3.95477e-06	1.34918	4.65363e-06	1.34918	6.10657e-06
1.35162	3.06519e-06	1.35162	3.4433e-06	1.35162	3.98071e-06	1.35162	4.68201e-06	1.35162	6.14624e-06
1.35406	3.08807e-06	1.35406	3.46588e-06	1.35406	4.00879e-06	1.35406	4.71313e-06	1.35406	6.18591e-06
1.35651	3.10944e-06	1.35651	3.48938e-06	1.35651	4.03625e-06	1.35651	4.74396e-06	1.35651	6.22864e-06
1.35895	3.13263e-06	1.35895	3.51288e-06	1.35895	4.06494e-06	1.35895	4.77448e-06	1.35895	6.27136e-06
1.36139	3.15491e-06	1.36139	3.53729e-06	1.36139	4.09302e-06	1.36139	4.80621e-06	1.36139	6.31714e-06
1.36383	3.17932e-06	1.36383	3.56201e-06	1.36383	4.12262e-06	1.36383	4.84009e-06	1.36383	6.35986e-06
1.36627	3.2016e-06	1.36627	3.58643e-06	1.36627	4.15192e-06	1.36627	4.87e-06	1.36627	6.40259e-06
1.36871	3.22693e-06	1.36871	3.61206e-06	1.36871	4.18152e-06	1.36871	4.90509e-06	1.36871	6.44836e-06
1.37115	3.24982e-06	1.37115	3.6377e-06	1.37115	4.21295e-06	1.37115	4.93896e-06	1.37115	6.49414e-06
1.3736	3.27637e-06	1.3736	3.66333e-06	1.3736	4.24316e-06	1.3736	4.97253e-06	1.3736	6.53992e-06
1.37604	3.30048e-06	1.37604	3.69141e-06	1.37604	4.27429e-06	1.37604	5.00793e-06	1.37604	6.58569e-06
1.37848	3.32642e-06	1.37848	3.71796e-06	1.37848	4.30634e-06	1.37848	5.04272e-06	1.37848	6.63452e-06
1.38092	3.35236e-06	1.38092	3.74451e-06	1.38092	4.33838e-06	1.38092	5.07935e-06	1.38092	6.68335e-06
1.38336	3.37921e-06	1.38336	3.77502e-06	1.38336	4.37317e-06	1.38336	5.11505e-06	1.38336	6.73218e-06
1.3858	3.40454e-06	1.3858	3.80035e-06	1.3858	4.40491e-06	1.3858	5.15289e-06	1.3858	6.78101e-06
1.38824	3.43109e-06	1.38824	3.83026e-06	1.38824	4.4397e-06	1.38824	5.1886e-06	1.38824	6.82983e-06
1.39069	3.45734e-06	1.39069	3.85895e-06	1.39069	4.47357e-06	1.39069	5.22583e-06	1.39069	6.87866e-06
1.39313	3.48602e-06	1.39313	3.88794e-06	1.39313	4.50745e-06	1.39313	5.26398e-06	1.39313	6.93054e-06
1.39557	3.51318e-06	1.39557	3.91724e-06	1.39557	4.54163e-06	1.39557	5.30273e-06	1.39557	6.98242e-06
1.39801	3.54126e-06	1.39801	3.94897e-06	1.39801	4.57764e-06	1.39801	5.3421e-06	1.39801	7.0343e-06
1.40045	3.56964e-06	1.40045	3.9798e-06	1.40045	4.61365e-06	1.40045	5.38147e-06	1.40045	7.08618e-06
1.40289	3.59863e-06	1.40289	4.01093e-06	1.40289	4.65027e-06	1.40289	5.42206e-06	1.40289	7.14111e-06
1.40533	3.62823e-06	1.40533	4.04144e-06	1.40533	4.68628e-06	1.40533	5.46173e-06	1.40533	7.19299e-06
1.40778	3.65601e-06	1.40778	4.07196e-06	1.40778	4.72321e-06	1.40778	5.50232e-06	1.40778	7.24792e-06
1.41022	3.68561e-06	1.41022	4.10461e-06	1.41022	4.75922e-06	1.41022	5.54382e-06	1.41022	7.2998e-06
1.41266	3.71704e-06	1.41266	4.13757e-06	1.41266	4.79706e-06	1.41266	5.58533e-06	1.41266	7.35779e-06
1.4151	3.74664e-06	1.4151	4.16962e-06	1.4151	4.83643e-06	1.4151	5.62775e-06	1.4151	7.41272e-06
1.41754	3.77747e-06	1.41754	4.20471e-06	1.41754	4.87671e-06	1.41754	5.67139e-06	1.41754	7.4707e-06
1.41998	3.8089e-06	1.41998	4.23706e-06	1.41998	4.91425e-06	1.41998	5.7135e-06	1.41998	7.52563e-06
1.42242	3.84003e-06	1.42242	4.27277e-06	1.42242	4.95422e-06	1.42242	5.75867e-06	1.42242	7.58362e-06
1.42487	3.87115e-06	1.42487	4.30573e-06	1.42487	4.99329e-06	1.42487	5.79987e-06	1.42487	7.6416e-06
1.42731	3.90411e-06	1.42731	4.34113e-06	1.42731	5.03265e-06	1.42731	5.84717e-06	1.42731	7.69958e-06
1.42975	3.93524e-06	1.42975	4.37561e-06	1.42975	5.07385e-06	1.42975	5.89111e-06	1.42975	7.76062e-06
1.43219	3.96759e-06	1.43219	4.41284e-06	1.43219	5.11505e-06	1.43219	5.93536e-06	1.43219	7.8186e-06
1.43463	4.00146e-06	1.43463	4.44733e-06	1.43463	5.15472e-06	1.43463	5.98236e-06	1.43463	7.87964e-06
1.43707	4.03534e-06	1.43707	4.48517e-06	1.43707	5.19745e-06	1.43707	6.02936e-06	1.43707	7.94067e-06
1.43951	4.0683e-06	1.43951	4.51996e-06	1.43951	5.23895e-06	1.43951	6.07605e-06	1.43951	7.99866e-06
1.44196	4.10217e-06	1.44196	4.55811e-06	1.44196	5.28229e-06	1.44196	6.12488e-06	1.44196	8.0658e-06
1.4444	4.13666e-06	1.4444	4.59503e-06	1.4444	5.32471e-06	1.4444	6.17065e-06	1.4444	8.12378e-06
1.44684	4.17114e-06	1.44684	4.63257e-06	1.44684	5.37018e-06	1.44684	6.21948e-06	1.44684	8.18787e-06
1.44928	4.20532e-06	1.44928	4.67102e-06	1.44928	5.4126e-06	1.44928	6.26526e-06	1.44928	8.2489e-06
1.45172	4.24133e-06	1.45172	4.70978e-06	1.45172	5.45685e-06	1.45172	6.31409e-06	1.45172	8.31299e-06
1.45416	4.27643e-06	1.45416	4.74945e-06	1.45416	5.5014e-06	1.45416	6.36597e-06	1.45416	8.37708e-06
1.4566	4.31396e-06	1.4566	4.78943e-06	1.4566	5.54718e-06	1.4566	6.41479e-06	1.4566	8.44421e-06
1.45905	4.34906e-06	1.45905	4.82758e-06	1.45905	5.59326e-06	1.45905	6.46362e-06	1.45905	8.50525e-06
1.46149	4.38568e-06	1.46149	4.86938e-06	1.46149	5.64056e-06	1.46149	6.5155e-06	1.46149	8.57544e-06
1.46393	4.42261e-06	1.46393	4.90692e-06	1.46393	5.68481e-06	1.46393	6.56433e-06	1.46393	8.63647e-06
1.46637	4.46014e-06	1.46637	4.95087e-06	1.46637	5.73303e-06	1.46637	6.61926e-06	1.46637	8.70667e-06
1.46881	4.49707e-06	1.46881	4.98993e-06	1.46881	5.77942e-06	1.46881	6.66809e-06	1.46881	8.77075e-06
1.47125	4.53522e-06	1.47125	5.03143e-06	1.47125	5.8255e-06	1.47125	6.72302e-06	1.47125	8.83789e-06
1.47369	4.57336e-06	1.47369	5.07355e-06	1.47369	5.87463e-06	1.47369	6.7749e-06	1.47369	8.90503e-06
1.47614	4.61304e-06	1.47614	5.11688e-06	1.47614	5.92499e-06	1.47614	6.82678e-06	1.47614	8.97522e-06
1.47858	4.64996e-06	1.47858	5.15839e-06	1.47858	5.9729e-06	1.47858	6.87866e-06	1.47858	9.04236e-06
1.48102	4.68933e-06	1.48102	5.20111e-06	1.48102	6.02325e-06	1.48102	6.93359e-06	1.48102	9.1095e-06
1.48346	4.72931e-06	1.48346	5.24384e-06	1.48346	6.073e-06	1.48346	6.98853e-06	1.48346	9.17969e-06
1.4859	4.76929e-06	1.4859	5.28687e-06	1.4859	6.12488e-06	1.4859	7.04041e-06	1.4859	9.24988e-06
1.48834	4.80835e-06	1.48834	5.33264e-06	1.48834	6.17371e-06	1.48834	7.09534e-06	1.48834	9.31702e-06
1.49078	4.84833e-06	1.49078	5.37537e-06	1.49078	6.22559e-06	1.49078	7.15027e-06	1.49078	9.38721e-06
1.49323	4.88892e-06	1.49323	5.42023e-06	1.49323	6.27441e-06	1.49323	7.2052e-06	1.49323	9.46045e-06
1.49567	4.93286e-06	1.49567	5.46722e-06	1.49567	6.32629e-06	1.49567	7.26318e-06	1.49567	9.53064e-06
1.49811	4.97192e-06	1.49811	5.50995e-06	1.49811	6.37817e-06	1.49811	7.31506e-06	1.49811	9.60083e-06
1.50055	5.01343e-06	1.50055	5.55664e-06	1.50055	6.43005e-06	1.50055	7.37305e-06	1.50055	9.67407e-06

## Sheet: Figure S11(b)
-1.4975	-2.40326e-05	-1.4975	-3.06427e-05	-1.4975	-3.49823e-05	-1.4975	-4.31824e-05	-1.4975	-5.60699e-05
-1.49506	-2.03003e-05	-1.49506	-2.55707e-05	-1.49506	-2.91504e-05	-1.49506	-3.56232e-05	-1.49506	-4.57428e-05
-1.49261	-1.80573e-05	-1.49261	-2.25647e-05	-1.49261	-2.57019e-05	-1.49261	-3.11676e-05	-1.49261	-3.96332e-05
-1.49017	-1.65039e-05	-1.49017	-2.05078e-05	-1.49017	-2.3349e-05	-1.49017	-2.81464e-05	-1.49017	-3.54553e-05
-1.48773	-1.5332e-05	-1.48773	-1.89728e-05	-1.48773	-2.15942e-05	-1.48773	-2.59155e-05	-1.48773	-3.23853e-05
-1.48529	-1.44073e-05	-1.48529	-1.77673e-05	-1.48529	-2.0224e-05	-1.48529	-2.41791e-05	-1.48529	-3.00446e-05
-1.48285	-1.36475e-05	-1.48285	-1.67816e-05	-1.48285	-1.9101e-05	-1.48285	-2.27722e-05	-1.48285	-2.81799e-05
-1.48041	-1.30066e-05	-1.48041	-1.59546e-05	-1.48041	-1.8161e-05	-1.48041	-2.15942e-05	-1.48041	-2.66479e-05
-1.47797	-1.24512e-05	-1.47797	-1.52405e-05	-1.47797	-1.73523e-05	-1.47797	-2.05933e-05	-1.47797	-2.53479e-05
-1.47552	-1.19598e-05	-1.47552	-1.4621e-05	-1.47552	-1.66473e-05	-1.47552	-1.97266e-05	-1.47552	-2.42279e-05
-1.47308	-1.15265e-05	-1.47308	-1.40686e-05	-1.47308	-1.60217e-05	-1.47308	-1.89575e-05	-1.47308	-2.32483e-05
-1.47064	-1.11359e-05	-1.47064	-1.35773e-05	-1.47064	-1.54663e-05	-1.47064	-1.828e-05	-1.47064	-2.23816e-05
-1.4682	-1.07758e-05	-1.4682	-1.31287e-05	-1.4682	-1.49597e-05	-1.4682	-1.76666e-05	-1.4682	-2.16003e-05
-1.46576	-1.04492e-05	-1.46576	-1.27258e-05	-1.46576	-1.4505e-05	-1.46576	-1.71112e-05	-1.46576	-2.08984e-05
-1.46332	-1.0144e-05	-1.46332	-1.23505e-05	-1.46332	-1.40808e-05	-1.46332	-1.65985e-05	-1.46332	-2.02545e-05
-1.46088	-9.86328e-06	-1.46088	-1.20087e-05	-1.46088	-1.36932e-05	-1.46088	-1.61377e-05	-1.46088	-1.96686e-05
-1.45844	-9.60083e-06	-1.45844	-1.16882e-05	-1.45844	-1.33331e-05	-1.45844	-1.57013e-05	-1.45844	-1.91284e-05
-1.45599	-9.35364e-06	-1.45599	-1.13922e-05	-1.45599	-1.29974e-05	-1.45599	-1.52985e-05	-1.45599	-1.86249e-05
-1.45355	-9.1217e-06	-1.45355	-1.11084e-05	-1.45355	-1.26801e-05	-1.45355	-1.49231e-05	-1.45355	-1.81549e-05
-1.45111	-8.90808e-06	-1.45111	-1.0849e-05	-1.45111	-1.23871e-05	-1.45111	-1.45721e-05	-1.45111	-1.77216e-05
-1.44867	-8.70056e-06	-1.44867	-1.06018e-05	-1.44867	-1.21063e-05	-1.44867	-1.42395e-05	-1.44867	-1.73065e-05
-1.44623	-8.51135e-06	-1.44623	-1.03668e-05	-1.44623	-1.18439e-05	-1.44623	-1.39282e-05	-1.44623	-1.6922e-05
-1.44379	-8.32825e-06	-1.44379	-1.0144e-05	-1.44379	-1.15936e-05	-1.44379	-1.36322e-05	-1.44379	-1.65588e-05
-1.44135	-8.1543e-06	-1.44135	-9.93652e-06	-1.44135	-1.13556e-05	-1.44135	-1.33545e-05	-1.44135	-1.6214e-05
-1.4389	-7.9895e-06	-1.4389	-9.73511e-06	-1.4389	-1.11298e-05	-1.4389	-1.3089e-05	-1.4389	-1.58875e-05
-1.43646	-7.83081e-06	-1.43646	-9.54285e-06	-1.43646	-1.09161e-05	-1.43646	-1.28387e-05	-1.43646	-1.55731e-05
-1.43402	-7.67822e-06	-1.43402	-9.35669e-06	-1.43402	-1.07086e-05	-1.43402	-1.25946e-05	-1.43402	-1.5274e-05
-1.43158	-7.53174e-06	-1.43158	-9.18274e-06	-1.43158	-1.05103e-05	-1.43158	-1.23657e-05	-1.43158	-1.49933e-05
-1.42914	-7.39136e-06	-1.42914	-9.01184e-06	-1.42914	-1.0321e-05	-1.42914	-1.21399e-05	-1.42914	-1.47217e-05
-1.4267	-7.26013e-06	-1.4267	-8.8501e-06	-1.4267	-1.0141e-05	-1.4267	-1.19324e-05	-1.4267	-1.44653e-05
-1.42426	-7.12891e-06	-1.42426	-8.69141e-06	-1.42426	-9.96399e-06	-1.42426	-1.17279e-05	-1.42426	-1.42151e-05
-1.42181	-7.00684e-06	-1.42181	-8.54187e-06	-1.42181	-9.79919e-06	-1.42181	-1.15326e-05	-1.42181	-1.39801e-05
-1.41937	-6.88477e-06	-1.41937	-8.39844e-06	-1.41937	-9.6344e-06	-1.41937	-1.13434e-05	-1.41937	-1.37512e-05
-1.41693	-6.7688e-06	-1.41693	-8.255e-06	-1.41693	-9.47571e-06	-1.41693	-1.11633e-05	-1.41693	-1.35315e-05
-1.41449	-6.65588e-06	-1.41449	-8.11768e-06	-1.41449	-9.32617e-06	-1.41449	-1.09863e-05	-1.41449	-1.33179e-05
-1.41205	-6.54907e-06	-1.41205	-7.9895e-06	-1.41205	-9.17969e-06	-1.41205	-1.08185e-05	-1.41205	-1.31165e-05
-1.40961	-6.44226e-06	-1.40961	-7.86133e-06	-1.40961	-9.03625e-06	-1.40961	-1.06537e-05	-1.40961	-1.29181e-05
-1.40717	-6.3385e-06	-1.40717	-7.73926e-06	-1.40717	-8.89893e-06	-1.40717	-1.0498e-05	-1.40717	-1.27289e-05
-1.40472	-6.24084e-06	-1.40472	-7.62024e-06	-1.40472	-8.7677e-06	-1.40472	-1.03424e-05	-1.40472	-1.25458e-05
-1.40228	-6.14624e-06	-1.40228	-7.50732e-06	-1.40228	-8.63953e-06	-1.40228	-1.01959e-05	-1.40228	-1.23688e-05
-1.39984	-6.05164e-06	-1.39984	-7.39441e-06	-1.39984	-8.5144e-06	-1.39984	-1.00525e-05	-1.39984	-1.21918e-05
-1.3974	-5.96008e-06	-1.3974	-7.2876e-06	-1.3974	-8.39233e-06	-1.3974	-9.91211e-06	-1.3974	-1.20239e-05
-1.39496	-5.86853e-06	-1.39496	-7.18384e-06	-1.39496	-8.27332e-06	-1.39496	-9.77783e-06	-1.39496	-1.18591e-05
-1.39252	-5.78308e-06	-1.39252	-7.08618e-06	-1.39252	-8.1604e-06	-1.39252	-9.64661e-06	-1.39252	-1.17035e-05
-1.39008	-5.69763e-06	-1.39008	-6.98547e-06	-1.39008	-8.04749e-06	-1.39008	-9.51843e-06	-1.39008	-1.15479e-05
-1.38763	-5.61829e-06	-1.38763	-6.89087e-06	-1.38763	-7.93762e-06	-1.38763	-9.39331e-06	-1.38763	-1.14014e-05
-1.38519	-5.53589e-06	-1.38519	-6.79321e-06	-1.38519	-7.83081e-06	-1.38519	-9.27124e-06	-1.38519	-1.12549e-05
-1.38275	-5.45959e-06	-1.38275	-6.70471e-06	-1.38275	-7.7301e-06	-1.38275	-9.15527e-06	-1.38275	-1.11145e-05
-1.38031	-5.3833e-06	-1.38031	-6.61316e-06	-1.38031	-7.62939e-06	-1.38031	-9.03931e-06	-1.38031	-1.09772e-05
-1.37787	-5.31006e-06	-1.37787	-6.52771e-06	-1.37787	-7.52869e-06	-1.37787	-8.92944e-06	-1.37787	-1.08429e-05
-1.37543	-5.23682e-06	-1.37543	-6.43921e-06	-1.37543	-7.43103e-06	-1.37543	-8.81653e-06	-1.37543	-1.07117e-05
-1.37299	-5.16357e-06	-1.37299	-6.35681e-06	-1.37299	-7.33948e-06	-1.37299	-8.71277e-06	-1.37299	-1.05865e-05
-1.37054	-5.09644e-06	-1.37054	-6.27441e-06	-1.37054	-7.24487e-06	-1.37054	-8.60596e-06	-1.37054	-1.04614e-05
-1.3681	-5.02625e-06	-1.3681	-6.19507e-06	-1.3681	-7.15637e-06	-1.3681	-8.5083e-06	-1.3681	-1.03424e-05
-1.36566	-4.96216e-06	-1.36566	-6.11877e-06	-1.36566	-7.07092e-06	-1.36566	-8.40759e-06	-1.36566	-1.02203e-05
-1.36322	-4.89807e-06	-1.36322	-6.04248e-06	-1.36322	-6.98547e-06	-1.36322	-8.31299e-06	-1.36322	-1.01044e-05
-1.36078	-4.83398e-06	-1.36078	-5.96924e-06	-1.36078	-6.90308e-06	-1.36078	-8.21838e-06	-1.36078	-9.99146e-06
-1.35834	-4.7699e-06	-1.35834	-5.896e-06	-1.35834	-6.82068e-06	-1.35834	-8.12378e-06	-1.35834	-9.87854e-06
-1.3559	-4.71191e-06	-1.3559	-5.82275e-06	-1.3559	-6.74133e-06	-1.3559	-8.03528e-06	-1.3559	-9.76868e-06
-1.35345	-4.65332e-06	-1.35345	-5.75867e-06	-1.35345	-6.66504e-06	-1.35345	-7.94678e-06	-1.35345	-9.66187e-06
-1.35101	-4.59473e-06	-1.35101	-5.68848e-06	-1.35101	-6.58569e-06	-1.35101	-7.86133e-06	-1.35101	-9.55505e-06
-1.34857	-4.53857e-06	-1.34857	-5.62439e-06	-1.34857	-6.51245e-06	-1.34857	-7.77588e-06	-1.34857	-9.45435e-06
-1.34613	-4.48273e-06	-1.34613	-5.55725e-06	-1.34613	-6.43921e-06	-1.34613	-7.69348e-06	-1.34613	-9.34753e-06
-1.34369	-4.42963e-06	-1.34369	-5.49622e-06	-1.34369	-6.36902e-06	-1.34369	-7.61414e-06	-1.34369	-9.25293e-06
-1.34125	-4.37622e-06	-1.34125	-5.43213e-06	-1.34125	-6.29883e-06	-1.34125	-7.53479e-06	-1.34125	-9.15222e-06
-1.33881	-4.32404e-06	-1.33881	-5.37109e-06	-1.33881	-6.22864e-06	-1.33881	-7.4585e-06	-1.33881	-9.06067e-06
-1.33636	-4.27155e-06	-1.33636	-5.31311e-06	-1.33636	-6.1615e-06	-1.33636	-7.3822e-06	-1.33636	-8.96606e-06
-1.33392	-4.22211e-06	-1.33392	-5.25513e-06	-1.33392	-6.09741e-06	-1.33392	-7.30896e-06	-1.33392	-8.87756e-06
-1.33148	-4.17236e-06	-1.33148	-5.19714e-06	-1.33148	-6.03333e-06	-1.33148	-7.23572e-06	-1.33148	-8.78906e-06
-1.32904	-4.12476e-06	-1.32904	-5.14221e-06	-1.32904	-5.96924e-06	-1.32904	-7.16553e-06	-1.32904	-8.70056e-06
-1.3266	-4.07898e-06	-1.3266	-5.08728e-06	-1.3266	-5.9082e-06	-1.3266	-7.09534e-06	-1.3266	-8.61816e-06
-1.32416	-4.03259e-06	-1.32416	-5.03235e-06	-1.32416	-5.84412e-06	-1.32416	-7.0282e-06	-1.32416	-8.53577e-06
-1.32172	-3.98804e-06	-1.32172	-4.98047e-06	-1.32172	-5.78613e-06	-1.32172	-6.96106e-06	-1.32172	-8.45337e-06
-1.31927	-3.94318e-06	-1.31927	-4.92859e-06	-1.31927	-5.72815e-06	-1.31927	-6.89697e-06	-1.31927	-8.37402e-06
-1.31683	-3.89923e-06	-1.31683	-4.87671e-06	-1.31683	-5.67017e-06	-1.31683	-6.83289e-06	-1.31683	-8.29773e-06
-1.31439	-3.85742e-06	-1.31439	-4.83093e-06	-1.31439	-5.61523e-06	-1.31439	-6.7688e-06	-1.31439	-8.21838e-06
-1.31195	-3.81439e-06	-1.31195	-4.77905e-06	-1.31195	-5.5603e-06	-1.31195	-6.70776e-06	-1.31195	-8.14514e-06
-1.30951	-3.7738e-06	-1.30951	-4.73419e-06	-1.30951	-5.50537e-06	-1.30951	-6.64673e-06	-1.30951	-8.0719e-06
-1.30707	-3.73352e-06	-1.30707	-4.68597e-06	-1.30707	-5.45044e-06	-1.30707	-6.58569e-06	-1.30707	-7.99866e-06
-1.30463	-3.69415e-06	-1.30463	-4.64203e-06	-1.30463	-5.40161e-06	-1.30463	-6.52771e-06	-1.30463	-7.92847e-06
-1.30219	-3.65662e-06	-1.30219	-4.59595e-06	-1.30219	-5.34668e-06	-1.30219	-6.46973e-06	-1.30219	-7.85828e-06
-1.29974	-3.61755e-06	-1.29974	-4.552e-06	-1.29974	-5.29785e-06	-1.29974	-6.41479e-06	-1.29974	-7.79114e-06
-1.2973	-3.57941e-06	-1.2973	-4.50836e-06	-1.2973	-5.24902e-06	-1.2973	-6.35681e-06	-1.2973	-7.724e-06
-1.29486	-3.54279e-06	-1.29486	-4.46503e-06	-1.29486	-5.2002e-06	-1.29486	-6.30493e-06	-1.29486	-7.65991e-06
-1.29242	-3.50616e-06	-1.29242	-4.42261e-06	-1.29242	-5.15137e-06	-1.29242	-6.25305e-06	-1.29242	-7.59277e-06
-1.28998	-3.47137e-06	-1.28998	-4.38141e-06	-1.28998	-5.10559e-06	-1.28998	-6.19812e-06	-1.28998	-7.53174e-06
-1.28754	-3.43567e-06	-1.28754	-4.34113e-06	-1.28754	-5.05981e-06	-1.28754	-6.14624e-06	-1.28754	-7.4707e-06
-1.2851	-3.4024e-06	-1.2851	-4.30145e-06	-1.2851	-5.01404e-06	-1.2851	-6.09741e-06	-1.2851	-7.40967e-06
-1.28265	-3.36761e-06	-1.28265	-4.26331e-06	-1.28265	-4.97131e-06	-1.28265	-6.04858e-06	-1.28265	-7.35168e-06
-1.28021	-3.33527e-06	-1.28021	-4.22394e-06	-1.28021	-4.92859e-06	-1.28021	-5.99976e-06	-1.28021	-7.2937e-06
-1.27777	-3.30017e-06	-1.27777	-4.18488e-06	-1.27777	-4.88586e-06	-1.27777	-5.95093e-06	-1.27777	-7.23572e-06
-1.27533	-3.26935e-06	-1.27533	-4.14978e-06	-1.27533	-4.84314e-06	-1.27533	-5.90515e-06	-1.27533	-7.18079e-06
-1.27289	-3.23792e-06	-1.27289	-4.11255e-06	-1.27289	-4.80042e-06	-1.27289	-5.85632e-06	-1.27289	-7.12585e-06
-1.27045	-3.2077e-06	-1.27045	-4.07654e-06	-1.27045	-4.7641e-06	-1.27045	-5.81055e-06	-1.27045	-7.07397e-06
-1.26801	-3.17596e-06	-1.26801	-4.04083e-06	-1.26801	-4.72443e-06	-1.26801	-5.76477e-06	-1.26801	-7.01904e-06
-1.26556	-3.14697e-06	-1.26556	-4.00726e-06	-1.26556	-4.68536e-06	-1.26556	-5.72205e-06	-1.26556	-6.96716e-06
-1.26312	-3.11798e-06	-1.26312	-3.97278e-06	-1.26312	-4.64691e-06	-1.26312	-5.67932e-06	-1.26312	-6.91833e-06
-1.26068	-3.08929e-06	-1.26068	-3.93921e-06	-1.26068	-4.6109e-06	-1.26068	-5.6366e-06	-1.26068	-6.86646e-06
-1.25824	-3.05908e-06	-1.25824	-3.90686e-06	-1.25824	-4.57306e-06	-1.25824	-5.59387e-06	-1.25824	-6.81763e-06
-1.2558	-3.03192e-06	-1.2558	-3.8739e-06	-1.2558	-4.53796e-06	-1.2558	-5.5542e-06	-1.2558	-6.7688e-06
-1.25336	-3.00537e-06	-1.25336	-3.84186e-06	-1.25336	-4.50073e-06	-1.25336	-5.51147e-06	-1.25336	-6.71997e-06
-1.25092	-2.97913e-06	-1.25092	-3.81134e-06	-1.25092	-4.46625e-06	-1.25092	-5.4718e-06	-1.25092	-6.67419e-06
-1.24847	-2.9538e-06	-1.24847	-3.78113e-06	-1.24847	-4.43176e-06	-1.24847	-5.43213e-06	-1.24847	-6.62537e-06
-1.24603	-2.92725e-06	-1.24603	-3.75092e-06	-1.24603	-4.39758e-06	-1.24603	-5.39551e-06	-1.24603	-6.58264e-06
-1.24359	-2.90161e-06	-1.24359	-3.72101e-06	-1.24359	-4.36401e-06	-1.24359	-5.35889e-06	-1.24359	-6.53687e-06
-1.24115	-2.8775e-06	-1.24115	-3.69263e-06	-1.24115	-4.33044e-06	-1.24115	-5.31921e-06	-1.24115	-6.49109e-06
-1.23871	-2.85217e-06	-1.23871	-3.66333e-06	-1.23871	-4.29993e-06	-1.23871	-5.28259e-06	-1.23871	-6.44836e-06
-1.23627	-2.82837e-06	-1.23627	-3.63495e-06	-1.23627	-4.26666e-06	-1.23627	-5.24902e-06	-1.23627	-6.40564e-06
-1.23383	-2.80304e-06	-1.23383	-3.60596e-06	-1.23383	-4.23523e-06	-1.23383	-5.2124e-06	-1.23383	-6.36292e-06
-1.23138	-2.77954e-06	-1.23138	-3.58093e-06	-1.23138	-4.20532e-06	-1.23138	-5.17578e-06	-1.23138	-6.32324e-06
-1.22894	-2.75665e-06	-1.22894	-3.55194e-06	-1.22894	-4.17206e-06	-1.22894	-5.14221e-06	-1.22894	-6.28357e-06
-1.2265	-2.73315e-06	-1.2265	-3.52692e-06	-1.2265	-4.14307e-06	-1.2265	-5.10864e-06	-1.2265	-6.2439e-06
-1.22406	-2.71179e-06	-1.22406	-3.50067e-06	-1.22406	-4.11224e-06	-1.22406	-5.07507e-06	-1.22406	-6.20422e-06
-1.22162	-2.6886e-06	-1.22162	-3.47504e-06	-1.22162	-4.08356e-06	-1.22162	-5.0415e-06	-1.22162	-6.16455e-06
-1.21918	-2.66754e-06	-1.21918	-3.44879e-06	-1.21918	-4.05426e-06	-1.21918	-5.00793e-06	-1.21918	-6.12488e-06
-1.21674	-2.64618e-06	-1.21674	-3.42529e-06	-1.21674	-4.02618e-06	-1.21674	-4.97742e-06	-1.21674	-6.08826e-06
-1.21429	-2.62482e-06	-1.21429	-3.39996e-06	-1.21429	-3.99689e-06	-1.21429	-4.9469e-06	-1.21429	-6.04858e-06
-1.21185	-2.60406e-06	-1.21185	-3.37677e-06	-1.21185	-3.96973e-06	-1.21185	-4.91638e-06	-1.21185	-6.01196e-06
-1.20941	-2.58575e-06	-1.20941	-3.35297e-06	-1.20941	-3.94257e-06	-1.20941	-4.88586e-06	-1.20941	-5.97534e-06
-1.20697	-2.5647e-06	-1.20697	-3.32916e-06	-1.20697	-3.91571e-06	-1.20697	-4.85535e-06	-1.20697	-5.94177e-06
-1.20453	-2.54456e-06	-1.20453	-3.30627e-06	-1.20453	-3.88885e-06	-1.20453	-4.82605e-06	-1.20453	-5.90515e-06
-1.20209	-2.52594e-06	-1.20209	-3.28461e-06	-1.20209	-3.86261e-06	-1.20209	-4.79553e-06	-1.20209	-5.86853e-06
-1.19965	-2.50671e-06	-1.19965	-3.25989e-06	-1.19965	-3.83636e-06	-1.19965	-4.76624e-06	-1.19965	-5.83191e-06
-1.1972	-2.48749e-06	-1.1972	-3.24005e-06	-1.1972	-3.81165e-06	-1.1972	-4.73938e-06	-1.1972	-5.79834e-06
-1.19476	-2.46826e-06	-1.19476	-3.21716e-06	-1.19476	-3.78601e-06	-1.19476	-4.70978e-06	-1.19476	-5.76172e-06
-1.19232	-2.44995e-06	-1.19232	-3.19519e-06	-1.19232	-3.7619e-06	-1.19232	-4.68262e-06	-1.19232	-5.72815e-06
-1.18988	-2.43164e-06	-1.18988	-3.17444e-06	-1.18988	-3.73749e-06	-1.18988	-4.65485e-06	-1.18988	-5.69458e-06
-1.18744	-2.41486e-06	-1.18744	-3.15399e-06	-1.18744	-3.71307e-06	-1.18744	-4.6283e-06	-1.18744	-5.65796e-06
-1.185	-2.39746e-06	-1.185	-3.13324e-06	-1.185	-3.68896e-06	-1.185	-4.60114e-06	-1.185	-5.62439e-06
-1.18256	-2.37946e-06	-1.18256	-3.1134e-06	-1.18256	-3.66638e-06	-1.18256	-4.57428e-06	-1.18256	-5.59082e-06
-1.18011	-2.36206e-06	-1.18011	-3.09296e-06	-1.18011	-3.6441e-06	-1.18011	-4.54712e-06	-1.18011	-5.55725e-06
-1.17767	-2.34619e-06	-1.17767	-3.07404e-06	-1.17767	-3.62122e-06	-1.17767	-4.52209e-06	-1.17767	-5.52673e-06
-1.17523	-2.32849e-06	-1.17523	-3.05389e-06	-1.17523	-3.59955e-06	-1.17523	-4.49554e-06	-1.17523	-5.49316e-06
-1.17279	-2.31262e-06	-1.17279	-3.03528e-06	-1.17279	-3.57788e-06	-1.17279	-4.47113e-06	-1.17279	-5.46265e-06
-1.17035	-2.29645e-06	-1.17035	-3.01666e-06	-1.17035	-3.5553e-06	-1.17035	-4.44489e-06	-1.17035	-5.43213e-06
-1.16791	-2.2818e-06	-1.16791	-2.99713e-06	-1.16791	-3.53424e-06	-1.16791	-4.42139e-06	-1.16791	-5.39856e-06
-1.16547	-2.26471e-06	-1.16547	-2.97882e-06	-1.16547	-3.51349e-06	-1.16547	-4.39728e-06	-1.16547	-5.37109e-06
-1.16302	-2.24884e-06	-1.16302	-2.96112e-06	-1.16302	-3.49243e-06	-1.16302	-4.37317e-06	-1.16302	-5.34058e-06
-1.16058	-2.23389e-06	-1.16058	-2.94312e-06	-1.16058	-3.4729e-06	-1.16058	-4.34967e-06	-1.16058	-5.31311e-06
-1.15814	-2.21985e-06	-1.15814	-2.92511e-06	-1.15814	-3.45306e-06	-1.15814	-4.32678e-06	-1.15814	-5.28259e-06
-1.1557	-2.2049e-06	-1.1557	-2.90649e-06	-1.1557	-3.43292e-06	-1.1557	-4.30298e-06	-1.1557	-5.25513e-06
-1.15326	-2.18933e-06	-1.15326	-2.89032e-06	-1.15326	-3.41248e-06	-1.15326	-4.2804e-06	-1.15326	-5.22766e-06
-1.15082	-2.17499e-06	-1.15082	-2.8717e-06	-1.15082	-3.39294e-06	-1.15082	-4.25751e-06	-1.15082	-5.2002e-06
-1.14838	-2.16064e-06	-1.14838	-2.85614e-06	-1.14838	-3.37524e-06	-1.14838	-4.23584e-06	-1.14838	-5.17578e-06
-1.14594	-2.14874e-06	-1.14594	-2.83844e-06	-1.14594	-3.35754e-06	-1.14594	-4.21448e-06	-1.14594	-5.14526e-06
-1.14349	-2.13348e-06	-1.14349	-2.82196e-06	-1.14349	-3.33771e-06	-1.14349	-4.1922e-06	-1.14349	-5.12085e-06
-1.14105	-2.11945e-06	-1.14105	-2.8067e-06	-1.14105	-3.31909e-06	-1.14105	-4.17023e-06	-1.14105	-5.09338e-06
-1.13861	-2.10632e-06	-1.13861	-2.79022e-06	-1.13861	-3.30139e-06	-1.13861	-4.15039e-06	-1.13861	-5.06897e-06
-1.13617	-2.0932e-06	-1.13617	-2.77435e-06	-1.13617	-3.28369e-06	-1.13617	-4.12811e-06	-1.13617	-5.04456e-06
-1.13373	-2.08069e-06	-1.13373	-2.75909e-06	-1.13373	-3.26599e-06	-1.13373	-4.10858e-06	-1.13373	-5.02014e-06
-1.13129	-2.06848e-06	-1.13129	-2.74353e-06	-1.13129	-3.2486e-06	-1.13129	-4.08813e-06	-1.13129	-4.99573e-06
-1.12885	-2.05505e-06	-1.12885	-2.72919e-06	-1.12885	-3.2309e-06	-1.12885	-4.06799e-06	-1.12885	-4.96826e-06
-1.1264	-2.04193e-06	-1.1264	-2.71149e-06	-1.1264	-3.21442e-06	-1.1264	-4.04663e-06	-1.1264	-4.9469e-06
-1.12396	-2.03003e-06	-1.12396	-2.69745e-06	-1.12396	-3.19702e-06	-1.12396	-4.02863e-06	-1.12396	-4.92249e-06
-1.12152	-2.01874e-06	-1.12152	-2.68311e-06	-1.12152	-3.18085e-06	-1.12152	-4.00787e-06	-1.12152	-4.89807e-06
-1.11908	-2.00623e-06	-1.11908	-2.66907e-06	-1.11908	-3.16467e-06	-1.11908	-3.98834e-06	-1.11908	-4.87701e-06
-1.11664	-1.99524e-06	-1.11664	-2.6532e-06	-1.11664	-3.1485e-06	-1.11664	-3.96942e-06	-1.11664	-4.85565e-06
-1.1142	-1.98273e-06	-1.1142	-2.63947e-06	-1.1142	-3.13416e-06	-1.1142	-3.9505e-06	-1.1142	-4.83307e-06
-1.11176	-1.97174e-06	-1.11176	-2.62573e-06	-1.11176	-3.11646e-06	-1.11176	-3.93097e-06	-1.11176	-4.8111e-06
-1.10931	-1.96075e-06	-1.10931	-2.612e-06	-1.10931	-3.10181e-06	-1.10931	-3.91235e-06	-1.10931	-4.7879e-06
-1.10687	-1.94977e-06	-1.10687	-2.59766e-06	-1.10687	-3.08594e-06	-1.10687	-3.89374e-06	-1.10687	-4.76715e-06
-1.10443	-1.93756e-06	-1.10443	-2.58392e-06	-1.10443	-3.07098e-06	-1.10443	-3.87604e-06	-1.10443	-4.74518e-06
-1.10199	-1.92688e-06	-1.10199	-2.57141e-06	-1.10199	-3.05573e-06	-1.10199	-3.85773e-06	-1.10199	-4.72382e-06
-1.09955	-1.9165e-06	-1.09955	-2.55859e-06	-1.09955	-3.04108e-06	-1.09955	-3.84094e-06	-1.09955	-4.70398e-06
-1.09711	-1.90491e-06	-1.09711	-2.54578e-06	-1.09711	-3.02643e-06	-1.09711	-3.82202e-06	-1.09711	-4.68231e-06
-1.09467	-1.89392e-06	-1.09467	-2.53235e-06	-1.09467	-3.01147e-06	-1.09467	-3.80432e-06	-1.09467	-4.66125e-06
-1.09222	-1.88354e-06	-1.09222	-2.51923e-06	-1.09222	-2.99683e-06	-1.09222	-3.78754e-06	-1.09222	-4.64172e-06
-1.08978	-1.87378e-06	-1.08978	-2.50702e-06	-1.08978	-2.98279e-06	-1.08978	-3.77014e-06	-1.08978	-4.62067e-06
-1.08734	-1.8634e-06	-1.08734	-2.4939e-06	-1.08734	-2.96936e-06	-1.08734	-3.75305e-06	-1.08734	-4.60175e-06
-1.0849	-1.85333e-06	-1.0849	-2.4826e-06	-1.0849	-2.95532e-06	-1.0849	-3.73596e-06	-1.0849	-4.58038e-06
-1.08246	-1.84326e-06	-1.08246	-2.46887e-06	-1.08246	-2.94067e-06	-1.08246	-3.71948e-06	-1.08246	-4.55963e-06
-1.08002	-1.83411e-06	-1.08002	-2.45758e-06	-1.08002	-2.92725e-06	-1.08002	-3.70544e-06	-1.08002	-4.54132e-06
-1.07758	-1.82404e-06	-1.07758	-2.44385e-06	-1.07758	-2.91412e-06	-1.07758	-3.68713e-06	-1.07758	-4.52026e-06
-1.07513	-1.81458e-06	-1.07513	-2.43378e-06	-1.07513	-2.90222e-06	-1.07513	-3.67157e-06	-1.07513	-4.50073e-06
-1.07269	-1.80481e-06	-1.07269	-2.42065e-06	-1.07269	-2.88818e-06	-1.07269	-3.65479e-06	-1.07269	-4.48181e-06
-1.07025	-1.79565e-06	-1.07025	-2.41058e-06	-1.07025	-2.87415e-06	-1.07025	-3.63953e-06	-1.07025	-4.4632e-06
-1.06781	-1.78711e-06	-1.06781	-2.39868e-06	-1.06781	-2.86163e-06	-1.06781	-3.62305e-06	-1.06781	-4.44427e-06
-1.06537	-1.77643e-06	-1.06537	-2.38708e-06	-1.06537	-2.84973e-06	-1.06537	-3.60931e-06	-1.06537	-4.42657e-06
-1.06293	-1.76788e-06	-1.06293	-2.37427e-06	-1.06293	-2.83569e-06	-1.06293	-3.59283e-06	-1.06293	-4.40582e-06
-1.06049	-1.75964e-06	-1.06049	-2.3642e-06	-1.06049	-2.8241e-06	-1.06049	-3.57758e-06	-1.06049	-4.38904e-06
-1.05804	-1.75079e-06	-1.05804	-2.35382e-06	-1.05804	-2.81067e-06	-1.05804	-3.56171e-06	-1.05804	-4.37073e-06
-1.0556	-1.74255e-06	-1.0556	-2.34161e-06	-1.0556	-2.79755e-06	-1.0556	-3.54675e-06	-1.0556	-4.35364e-06
-1.05316	-1.73248e-06	-1.05316	-2.33093e-06	-1.05316	-2.78595e-06	-1.05316	-3.53271e-06	-1.05316	-4.33533e-06
-1.05072	-1.72455e-06	-1.05072	-2.31934e-06	-1.05072	-2.77344e-06	-1.05072	-3.51868e-06	-1.05072	-4.31702e-06
-1.04828	-1.7157e-06	-1.04828	-2.31018e-06	-1.04828	-2.76001e-06	-1.04828	-3.50311e-06	-1.04828	-4.30084e-06
-1.04584	-1.70624e-06	-1.04584	-2.29828e-06	-1.04584	-2.74902e-06	-1.04584	-3.48816e-06	-1.04584	-4.28131e-06
-1.0434	-1.69739e-06	-1.0434	-2.28821e-06	-1.0434	-2.73621e-06	-1.0434	-3.4729e-06	-1.0434	-4.26422e-06
-1.04095	-1.69006e-06	-1.04095	-2.27814e-06	-1.04095	-2.7243e-06	-1.04095	-3.45856e-06	-1.04095	-4.24774e-06
-1.03851	-1.68152e-06	-1.03851	-2.26746e-06	-1.03851	-2.7124e-06	-1.03851	-3.44391e-06	-1.03851	-4.23126e-06
-1.03607	-1.67267e-06	-1.03607	-2.2583e-06	-1.03607	-2.7002e-06	-1.03607	-3.43109e-06	-1.03607	-4.21417e-06
-1.03363	-1.66504e-06	-1.03363	-2.24762e-06	-1.03363	-2.68921e-06	-1.03363	-3.41736e-06	-1.03363	-4.19769e-06
-1.03119	-1.65649e-06	-1.03119	-2.23785e-06	-1.03119	-2.67853e-06	-1.03119	-3.40271e-06	-1.03119	-4.18152e-06
-1.02875	-1.64856e-06	-1.02875	-2.22839e-06	-1.02875	-2.66602e-06	-1.02875	-3.38806e-06	-1.02875	-4.16504e-06
-1.02631	-1.64093e-06	-1.02631	-2.2171e-06	-1.02631	-2.65442e-06	-1.02631	-3.37555e-06	-1.02631	-4.14886e-06
-1.02386	-1.63269e-06	-1.02386	-2.20673e-06	-1.02386	-2.64404e-06	-1.02386	-3.36121e-06	-1.02386	-4.13177e-06
-1.02142	-1.62476e-06	-1.02142	-2.19727e-06	-1.02142	-2.63275e-06	-1.02142	-3.34808e-06	-1.02142	-4.11682e-06
-1.01898	-1.61713e-06	-1.01898	-2.18719e-06	-1.01898	-2.62054e-06	-1.01898	-3.33466e-06	-1.01898	-4.10004e-06
-1.01654	-1.6098e-06	-1.01654	-2.17926e-06	-1.01654	-2.60986e-06	-1.01654	-3.32123e-06	-1.01654	-4.08539e-06
-1.0141	-1.60248e-06	-1.0141	-2.16858e-06	-1.0141	-2.6004e-06	-1.0141	-3.3078e-06	-1.0141	-4.06799e-06
-1.01166	-1.59668e-06	-1.01166	-2.15942e-06	-1.01166	-2.58942e-06	-1.01166	-3.29437e-06	-1.01166	-4.05273e-06
-1.00922	-1.58813e-06	-1.00922	-2.15057e-06	-1.00922	-2.57965e-06	-1.00922	-3.28125e-06	-1.00922	-4.03595e-06
-1.00677	-1.58081e-06	-1.00677	-2.14264e-06	-1.00677	-2.56836e-06	-1.00677	-3.26813e-06	-1.00677	-4.02283e-06
-1.00433	-1.57318e-06	-1.00433	-2.13135e-06	-1.00433	-2.55798e-06	-1.00433	-3.2547e-06	-1.00433	-4.00513e-06
-1.00189	-1.56616e-06	-1.00189	-2.1228e-06	-1.00189	-2.54822e-06	-1.00189	-3.24188e-06	-1.00189	-3.98987e-06
-0.99945	-1.55884e-06	-0.99945	-2.11273e-06	-0.99945	-2.53693e-06	-0.99945	-3.22876e-06	-0.99945	-3.97522e-06
-0.99701	-1.55212e-06	-0.99701	-2.10419e-06	-0.99701	-2.52716e-06	-0.99701	-3.21747e-06	-0.99701	-3.96118e-06
-0.99457	-1.54419e-06	-0.99457	-2.09473e-06	-0.99457	-2.51709e-06	-0.99457	-3.20374e-06	-0.99457	-3.9447e-06
-0.99213	-1.53809e-06	-0.99213	-2.08649e-06	-0.99213	-2.50732e-06	-0.99213	-3.19275e-06	-0.99213	-3.92944e-06
-0.98969	-1.53168e-06	-0.98969	-2.07703e-06	-0.98969	-2.49634e-06	-0.98969	-3.17993e-06	-0.98969	-3.91541e-06
-0.98724	-1.52374e-06	-0.98724	-2.06818e-06	-0.98724	-2.48749e-06	-0.98724	-3.16895e-06	-0.98724	-3.90045e-06
-0.9848	-1.51703e-06	-0.9848	-2.06024e-06	-0.9848	-2.4762e-06	-0.9848	-3.15491e-06	-0.9848	-3.88489e-06
-0.98236	-1.5094e-06	-0.98236	-2.0517e-06	-0.98236	-2.46552e-06	-0.98236	-3.14392e-06	-0.98236	-3.87177e-06
-0.97992	-1.5033e-06	-0.97992	-2.04193e-06	-0.97992	-2.45575e-06	-0.97992	-3.13232e-06	-0.97992	-3.85712e-06
-0.97748	-1.49658e-06	-0.97748	-2.03369e-06	-0.97748	-2.4472e-06	-0.97748	-3.12012e-06	-0.97748	-3.84277e-06
-0.97504	-1.48987e-06	-0.97504	-2.02637e-06	-0.97504	-2.43622e-06	-0.97504	-3.1073e-06	-0.97504	-3.82843e-06
-0.9726	-1.48315e-06	-0.9726	-2.01782e-06	-0.9726	-2.42737e-06	-0.9726	-3.09692e-06	-0.9726	-3.8147e-06
-0.97015	-1.47614e-06	-0.97015	-2.00958e-06	-0.97015	-2.41669e-06	-0.97015	-3.08441e-06	-0.97015	-3.80035e-06
-0.96771	-1.46973e-06	-0.96771	-2.00073e-06	-0.96771	-2.40662e-06	-0.96771	-3.07281e-06	-0.96771	-3.78571e-06
-0.96527	-1.4624e-06	-0.96527	-1.99249e-06	-0.96527	-2.39777e-06	-0.96527	-3.0603e-06	-0.96527	-3.77228e-06
-0.96283	-1.4566e-06	-0.96283	-1.98486e-06	-0.96283	-2.38861e-06	-0.96283	-3.04962e-06	-0.96283	-3.75885e-06
-0.96039	-1.44958e-06	-0.96039	-1.97632e-06	-0.96039	-2.37854e-06	-0.96039	-3.03802e-06	-0.96039	-3.7439e-06
-0.95795	-1.44379e-06	-0.95795	-1.96869e-06	-0.95795	-2.36847e-06	-0.95795	-3.02704e-06	-0.95795	-3.73169e-06
-0.95551	-1.43707e-06	-0.95551	-1.95984e-06	-0.95551	-2.35962e-06	-0.95551	-3.01483e-06	-0.95551	-3.71613e-06
-0.95306	-1.43188e-06	-0.95306	-1.95282e-06	-0.95306	-2.35199e-06	-0.95306	-3.00446e-06	-0.95306	-3.70331e-06
-0.95062	-1.42487e-06	-0.95062	-1.94366e-06	-0.95062	-2.34222e-06	-0.95062	-2.99286e-06	-0.95062	-3.69019e-06
-0.94818	-1.41876e-06	-0.94818	-1.93634e-06	-0.94818	-2.33276e-06	-0.94818	-2.98279e-06	-0.94818	-3.67737e-06
-0.94574	-1.41235e-06	-0.94574	-1.92841e-06	-0.94574	-2.32422e-06	-0.94574	-2.97058e-06	-0.94574	-3.6615e-06
-0.9433	-1.40656e-06	-0.9433	-1.922e-06	-0.9433	-2.31506e-06	-0.9433	-2.96051e-06	-0.9433	-3.65021e-06
-0.94086	-1.40015e-06	-0.94086	-1.91315e-06	-0.94086	-2.3053e-06	-0.94086	-2.94861e-06	-0.94086	-3.63525e-06
-0.93842	-1.39404e-06	-0.93842	-1.90582e-06	-0.93842	-2.29675e-06	-0.93842	-2.93823e-06	-0.93842	-3.62335e-06
-0.93597	-1.38824e-06	-0.93597	-1.89819e-06	-0.93597	-2.2879e-06	-0.93597	-2.92694e-06	-0.93597	-3.61023e-06
-0.93353	-1.38123e-06	-0.93353	-1.89087e-06	-0.93353	-2.27905e-06	-0.93353	-2.91595e-06	-0.93353	-3.5968e-06
-0.93109	-1.37543e-06	-0.93109	-1.88354e-06	-0.93109	-2.27142e-06	-0.93109	-2.90649e-06	-0.93109	-3.58307e-06
-0.92865	-1.36871e-06	-0.92865	-1.87592e-06	-0.92865	-2.26227e-06	-0.92865	-2.89612e-06	-0.92865	-3.56995e-06
-0.92621	-1.3623e-06	-0.92621	-1.8692e-06	-0.92621	-2.2522e-06	-0.92621	-2.88483e-06	-0.92621	-3.55774e-06
-0.92377	-1.35742e-06	-0.92377	-1.86066e-06	-0.92377	-2.24487e-06	-0.92377	-2.87476e-06	-0.92377	-3.54584e-06
-0.92133	-1.3501e-06	-0.92133	-1.85333e-06	-0.92133	-2.2348e-06	-0.92133	-2.86316e-06	-0.92133	-3.53119e-06
-0.91888	-1.34521e-06	-0.91888	-1.84692e-06	-0.91888	-2.22656e-06	-0.91888	-2.85339e-06	-0.91888	-3.51898e-06
-0.91644	-1.33942e-06	-0.91644	-1.83777e-06	-0.91644	-2.21863e-06	-0.91644	-2.84363e-06	-0.91644	-3.50616e-06
-0.914	-1.33392e-06	-0.914	-1.83075e-06	-0.914	-2.21069e-06	-0.914	-2.83264e-06	-0.914	-3.49274e-06
-0.91156	-1.32813e-06	-0.91156	-1.82404e-06	-0.91156	-2.20123e-06	-0.91156	-2.82227e-06	-0.91156	-3.48114e-06
-0.90912	-1.32355e-06	-0.90912	-1.81732e-06	-0.90912	-2.19299e-06	-0.90912	-2.81219e-06	-0.90912	-3.46802e-06
-0.90668	-1.31805e-06	-0.90668	-1.80939e-06	-0.90668	-2.18384e-06	-0.90668	-2.80151e-06	-0.90668	-3.45551e-06
-0.90424	-1.31195e-06	-0.90424	-1.80237e-06	-0.90424	-2.17712e-06	-0.90424	-2.79236e-06	-0.90424	-3.44269e-06
-0.90179	-1.30615e-06	-0.90179	-1.79565e-06	-0.90179	-2.16705e-06	-0.90179	-2.78076e-06	-0.90179	-3.42926e-06
-0.89935	-1.29944e-06	-0.89935	-1.78802e-06	-0.89935	-2.15881e-06	-0.89935	-2.77069e-06	-0.89935	-3.41766e-06
-0.89691	-1.29517e-06	-0.89691	-1.78101e-06	-0.89691	-2.14996e-06	-0.89691	-2.76062e-06	-0.89691	-3.40485e-06
-0.89447	-1.28998e-06	-0.89447	-1.77399e-06	-0.89447	-2.14233e-06	-0.89447	-2.74933e-06	-0.89447	-3.39142e-06
-0.89203	-1.28387e-06	-0.89203	-1.76697e-06	-0.89203	-2.13501e-06	-0.89203	-2.74017e-06	-0.89203	-3.37921e-06
-0.88959	-1.27808e-06	-0.88959	-1.75995e-06	-0.88959	-2.12585e-06	-0.88959	-2.7298e-06	-0.88959	-3.367e-06
-0.88715	-1.27319e-06	-0.88715	-1.75262e-06	-0.88715	-2.11823e-06	-0.88715	-2.71851e-06	-0.88715	-3.35419e-06
-0.8847	-1.26801e-06	-0.8847	-1.745e-06	-0.8847	-2.10968e-06	-0.8847	-2.70905e-06	-0.8847	-3.34137e-06
-0.88226	-1.26221e-06	-0.88226	-1.73859e-06	-0.88226	-2.10114e-06	-0.88226	-2.69928e-06	-0.88226	-3.32977e-06
-0.87982	-1.25702e-06	-0.87982	-1.73157e-06	-0.87982	-2.09473e-06	-0.87982	-2.6889e-06	-0.87982	-3.31787e-06
-0.87738	-1.25122e-06	-0.87738	-1.72485e-06	-0.87738	-2.08466e-06	-0.87738	-2.67944e-06	-0.87738	-3.30444e-06
-0.87494	-1.24664e-06	-0.87494	-1.71753e-06	-0.87494	-2.07825e-06	-0.87494	-2.66937e-06	-0.87494	-3.29315e-06
-0.8725	-1.24176e-06	-0.8725	-1.71112e-06	-0.8725	-2.06909e-06	-0.8725	-2.65869e-06	-0.8725	-3.28003e-06
-0.87006	-1.23505e-06	-0.87006	-1.70502e-06	-0.87006	-2.06055e-06	-0.87006	-2.64862e-06	-0.87006	-3.26782e-06
-0.86761	-1.22986e-06	-0.86761	-1.69739e-06	-0.86761	-2.05261e-06	-0.86761	-2.63855e-06	-0.86761	-3.2547e-06
-0.86517	-1.22437e-06	-0.86517	-1.68976e-06	-0.86517	-2.04468e-06	-0.86517	-2.62878e-06	-0.86517	-3.24219e-06
-0.86273	-1.21948e-06	-0.86273	-1.68427e-06	-0.86273	-2.03796e-06	-0.86273	-2.61841e-06	-0.86273	-3.23151e-06
-0.86029	-1.21368e-06	-0.86029	-1.67664e-06	-0.86029	-2.02942e-06	-0.86029	-2.60834e-06	-0.86029	-3.21899e-06
-0.85785	-1.2088e-06	-0.85785	-1.66992e-06	-0.85785	-2.02148e-06	-0.85785	-2.59857e-06	-0.85785	-3.20618e-06
-0.85541	-1.20331e-06	-0.85541	-1.66351e-06	-0.85541	-2.01355e-06	-0.85541	-2.5882e-06	-0.85541	-3.19489e-06
-0.85297	-1.19751e-06	-0.85297	-1.65619e-06	-0.85297	-2.00684e-06	-0.85297	-2.57904e-06	-0.85297	-3.18237e-06
-0.85052	-1.19232e-06	-0.85052	-1.64917e-06	-0.85052	-1.99768e-06	-0.85052	-2.56958e-06	-0.85052	-3.17108e-06
-0.84808	-1.18683e-06	-0.84808	-1.64246e-06	-0.84808	-1.98975e-06	-0.84808	-2.5589e-06	-0.84808	-3.15765e-06
-0.84564	-1.18317e-06	-0.84564	-1.63544e-06	-0.84564	-1.98273e-06	-0.84564	-2.54944e-06	-0.84564	-3.14667e-06
-0.8432	-1.17645e-06	-0.8432	-1.62964e-06	-0.8432	-1.97418e-06	-0.8432	-2.53937e-06	-0.8432	-3.13416e-06
-0.84076	-1.17157e-06	-0.84076	-1.62323e-06	-0.84076	-1.96716e-06	-0.84076	-2.53021e-06	-0.84076	-3.12286e-06
-0.83832	-1.16608e-06	-0.83832	-1.61591e-06	-0.83832	-1.95923e-06	-0.83832	-2.51953e-06	-0.83832	-3.10944e-06
-0.83588	-1.16119e-06	-0.83588	-1.60889e-06	-0.83588	-1.95129e-06	-0.83588	-2.51038e-06	-0.83588	-3.09723e-06
-0.83344	-1.15631e-06	-0.83344	-1.60187e-06	-0.83344	-1.94336e-06	-0.83344	-2.5e-06	-0.83344	-3.08563e-06
-0.83099	-1.15051e-06	-0.83099	-1.59637e-06	-0.83099	-1.93665e-06	-0.83099	-2.49146e-06	-0.83099	-3.07251e-06
-0.82855	-1.14594e-06	-0.82855	-1.58813e-06	-0.82855	-1.92871e-06	-0.82855	-2.48077e-06	-0.82855	-3.06183e-06
-0.82611	-1.14075e-06	-0.82611	-1.58295e-06	-0.82611	-1.92047e-06	-0.82611	-2.47131e-06	-0.82611	-3.04993e-06
-0.82367	-1.13525e-06	-0.82367	-1.57562e-06	-0.82367	-1.91284e-06	-0.82367	-2.46094e-06	-0.82367	-3.0365e-06
-0.82123	-1.13007e-06	-0.82123	-1.5686e-06	-0.82123	-1.9046e-06	-0.82123	-2.45209e-06	-0.82123	-3.02612e-06
-0.81879	-1.12457e-06	-0.81879	-1.56189e-06	-0.81879	-1.89819e-06	-0.81879	-2.44263e-06	-0.81879	-3.01331e-06
-0.81635	-1.11938e-06	-0.81635	-1.55609e-06	-0.81635	-1.89117e-06	-0.81635	-2.43256e-06	-0.81635	-3.00018e-06
-0.8139	-1.1145e-06	-0.8139	-1.54877e-06	-0.8139	-1.88263e-06	-0.8139	-2.42279e-06	-0.8139	-2.9892e-06
-0.81146	-1.10962e-06	-0.81146	-1.54144e-06	-0.81146	-1.87561e-06	-0.81146	-2.41302e-06	-0.81146	-2.9776e-06
-0.80902	-1.10413e-06	-0.80902	-1.53503e-06	-0.80902	-1.86798e-06	-0.80902	-2.40326e-06	-0.80902	-2.96387e-06
-0.80658	-1.09924e-06	-0.80658	-1.52893e-06	-0.80658	-1.86066e-06	-0.80658	-2.39319e-06	-0.80658	-2.95288e-06
-0.80414	-1.09375e-06	-0.80414	-1.52222e-06	-0.80414	-1.85211e-06	-0.80414	-2.38434e-06	-0.80414	-2.94098e-06
-0.8017	-1.08917e-06	-0.8017	-1.5155e-06	-0.8017	-1.84601e-06	-0.8017	-2.37488e-06	-0.8017	-2.92847e-06
-0.79926	-1.08398e-06	-0.79926	-1.5094e-06	-0.79926	-1.83807e-06	-0.79926	-2.3642e-06	-0.79926	-2.91656e-06
-0.79681	-1.07941e-06	-0.79681	-1.50299e-06	-0.79681	-1.83075e-06	-0.79681	-2.35474e-06	-0.79681	-2.90558e-06
-0.79437	-1.07483e-06	-0.79437	-1.49567e-06	-0.79437	-1.82312e-06	-0.79437	-2.34436e-06	-0.79437	-2.89246e-06
-0.79193	-1.06903e-06	-0.79193	-1.48987e-06	-0.79193	-1.81549e-06	-0.79193	-2.33582e-06	-0.79193	-2.88025e-06
-0.78949	-1.06354e-06	-0.78949	-1.48254e-06	-0.78949	-1.80817e-06	-0.78949	-2.32544e-06	-0.78949	-2.86835e-06
-0.78705	-1.05865e-06	-0.78705	-1.47614e-06	-0.78705	-1.79993e-06	-0.78705	-2.31628e-06	-0.78705	-2.85522e-06
-0.78461	-1.05377e-06	-0.78461	-1.46942e-06	-0.78461	-1.79382e-06	-0.78461	-2.3056e-06	-0.78461	-2.84332e-06
-0.78217	-1.04889e-06	-0.78217	-1.4624e-06	-0.78217	-1.78589e-06	-0.78217	-2.29675e-06	-0.78217	-2.83112e-06
-0.77972	-1.04401e-06	-0.77972	-1.4566e-06	-0.77972	-1.77856e-06	-0.77972	-2.28668e-06	-0.77972	-2.82013e-06
-0.77728	-1.03973e-06	-0.77728	-1.44928e-06	-0.77728	-1.77185e-06	-0.77728	-2.27692e-06	-0.77728	-2.80792e-06
-0.77484	-1.03424e-06	-0.77484	-1.44348e-06	-0.77484	-1.76422e-06	-0.77484	-2.26715e-06	-0.77484	-2.7951e-06
-0.7724	-1.02936e-06	-0.7724	-1.43616e-06	-0.7724	-1.7569e-06	-0.7724	-2.25739e-06	-0.7724	-2.7829e-06
-0.76996	-1.02356e-06	-0.76996	-1.43036e-06	-0.76996	-1.74805e-06	-0.76996	-2.24701e-06	-0.76996	-2.76917e-06
-0.76752	-1.01959e-06	-0.76752	-1.42426e-06	-0.76752	-1.74164e-06	-0.76752	-2.23877e-06	-0.76752	-2.75818e-06
-0.76508	-1.01471e-06	-0.76508	-1.41754e-06	-0.76508	-1.73401e-06	-0.76508	-2.22839e-06	-0.76508	-2.74628e-06
-0.76263	-1.00922e-06	-0.76263	-1.41052e-06	-0.76263	-1.72729e-06	-0.76263	-2.21832e-06	-0.76263	-2.73438e-06
-0.76019	-1.00372e-06	-0.76019	-1.4035e-06	-0.76019	-1.72058e-06	-0.76019	-2.20734e-06	-0.76019	-2.72125e-06
-0.75775	-1.00037e-06	-0.75775	-1.39771e-06	-0.75775	-1.71234e-06	-0.75775	-2.19849e-06	-0.75775	-2.70813e-06
-0.75531	-9.95178e-07	-0.75531	-1.39099e-06	-0.75531	-1.70441e-06	-0.75531	-2.18903e-06	-0.75531	-2.69653e-06
-0.75287	-9.89685e-07	-0.75287	-1.38367e-06	-0.75287	-1.698e-06	-0.75287	-2.17834e-06	-0.75287	-2.68402e-06
-0.75043	-9.85413e-07	-0.75043	-1.37726e-06	-0.75043	-1.68915e-06	-0.75043	-2.16705e-06	-0.75043	-2.67059e-06
-0.74799	-9.79614e-07	-0.74799	-1.37115e-06	-0.74799	-1.68243e-06	-0.74799	-2.15698e-06	-0.74799	-2.65991e-06
-0.74554	-9.74731e-07	-0.74554	-1.36444e-06	-0.74554	-1.67389e-06	-0.74554	-2.14722e-06	-0.74554	-2.64618e-06
-0.7431	-9.70459e-07	-0.7431	-1.35864e-06	-0.7431	-1.66687e-06	-0.7431	-2.13776e-06	-0.7431	-2.63367e-06
-0.74066	-9.64966e-07	-0.74066	-1.35132e-06	-0.74066	-1.65924e-06	-0.74066	-2.12616e-06	-0.74066	-2.62024e-06
-0.73822	-9.60388e-07	-0.73822	-1.34552e-06	-0.73822	-1.65314e-06	-0.73822	-2.11792e-06	-0.73822	-2.60925e-06
-0.73578	-9.56116e-07	-0.73578	-1.33881e-06	-0.73578	-1.64581e-06	-0.73578	-2.10724e-06	-0.73578	-2.59766e-06
-0.73334	-9.50317e-07	-0.73334	-1.33179e-06	-0.73334	-1.63757e-06	-0.73334	-2.09747e-06	-0.73334	-2.58362e-06
-0.7309	-9.43604e-07	-0.7309	-1.32568e-06	-0.7309	-1.62903e-06	-0.7309	-2.08588e-06	-0.7309	-2.57019e-06
-0.72845	-9.41162e-07	-0.72845	-1.32019e-06	-0.72845	-1.6217e-06	-0.72845	-2.07672e-06	-0.72845	-2.55798e-06
-0.72601	-9.36279e-07	-0.72601	-1.31287e-06	-0.72601	-1.61469e-06	-0.72601	-2.06482e-06	-0.72601	-2.54608e-06
-0.72357	-9.31091e-07	-0.72357	-1.30646e-06	-0.72357	-1.60645e-06	-0.72357	-2.05536e-06	-0.72357	-2.53265e-06
-0.72113	-9.26819e-07	-0.72113	-1.30096e-06	-0.72113	-1.59882e-06	-0.72113	-2.04529e-06	-0.72113	-2.51923e-06
-0.71869	-9.22241e-07	-0.71869	-1.29486e-06	-0.71869	-1.59119e-06	-0.71869	-2.03491e-06	-0.71869	-2.50732e-06
-0.71625	-9.17053e-07	-0.71625	-1.28754e-06	-0.71625	-1.58325e-06	-0.71625	-2.02484e-06	-0.71625	-2.49481e-06
-0.71381	-9.11865e-07	-0.71381	-1.28113e-06	-0.71381	-1.57501e-06	-0.71381	-2.01538e-06	-0.71381	-2.4823e-06
-0.71136	-9.06677e-07	-0.71136	-1.27441e-06	-0.71136	-1.56738e-06	-0.71136	-2.00287e-06	-0.71136	-2.46857e-06
-0.70892	-9.021e-07	-0.70892	-1.26801e-06	-0.70892	-1.56036e-06	-0.70892	-1.99371e-06	-0.70892	-2.45544e-06
-0.70648	-8.97827e-07	-0.70648	-1.26068e-06	-0.70648	-1.55151e-06	-0.70648	-1.98212e-06	-0.70648	-2.44263e-06
-0.70404	-8.92639e-07	-0.70404	-1.25427e-06	-0.70404	-1.54419e-06	-0.70404	-1.97174e-06	-0.70404	-2.43042e-06
-0.7016	-8.88062e-07	-0.7016	-1.24878e-06	-0.7016	-1.53625e-06	-0.7016	-1.96198e-06	-0.7016	-2.41577e-06
-0.69916	-8.83179e-07	-0.69916	-1.24115e-06	-0.69916	-1.52832e-06	-0.69916	-1.95129e-06	-0.69916	-2.40326e-06
-0.69672	-8.7738e-07	-0.69672	-1.23474e-06	-0.69672	-1.5213e-06	-0.69672	-1.94092e-06	-0.69672	-2.39166e-06
-0.69427	-8.72498e-07	-0.69427	-1.22864e-06	-0.69427	-1.51337e-06	-0.69427	-1.92993e-06	-0.69427	-2.37823e-06
-0.69183	-8.6792e-07	-0.69183	-1.22131e-06	-0.69183	-1.50513e-06	-0.69183	-1.91956e-06	-0.69183	-2.36389e-06
-0.68939	-8.63953e-07	-0.68939	-1.2149e-06	-0.68939	-1.4975e-06	-0.68939	-1.90857e-06	-0.68939	-2.35138e-06
-0.68695	-8.58765e-07	-0.68695	-1.20819e-06	-0.68695	-1.49017e-06	-0.68695	-1.89667e-06	-0.68695	-2.33673e-06
-0.68451	-8.53882e-07	-0.68451	-1.20209e-06	-0.68451	-1.48163e-06	-0.68451	-1.88629e-06	-0.68451	-2.32513e-06
-0.68207	-8.48694e-07	-0.68207	-1.19415e-06	-0.68207	-1.47369e-06	-0.68207	-1.87592e-06	-0.68207	-2.31079e-06
-0.67963	-8.44116e-07	-0.67963	-1.18805e-06	-0.67963	-1.46515e-06	-0.67963	-1.86523e-06	-0.67963	-2.29889e-06
-0.67719	-8.38623e-07	-0.67719	-1.18073e-06	-0.67719	-1.45752e-06	-0.67719	-1.85455e-06	-0.67719	-2.28516e-06
-0.67474	-8.34045e-07	-0.67474	-1.17462e-06	-0.67474	-1.44897e-06	-0.67474	-1.84296e-06	-0.67474	-2.27234e-06
-0.6723	-8.29773e-07	-0.6723	-1.16791e-06	-0.6723	-1.44073e-06	-0.6723	-1.83136e-06	-0.6723	-2.2583e-06
-0.66986	-8.2428e-07	-0.66986	-1.1615e-06	-0.66986	-1.43341e-06	-0.66986	-1.8222e-06	-0.66986	-2.24609e-06
-0.66742	-8.19397e-07	-0.66742	-1.15387e-06	-0.66742	-1.42426e-06	-0.66742	-1.8103e-06	-0.66742	-2.23145e-06
-0.66498	-8.14514e-07	-0.66498	-1.14746e-06	-0.66498	-1.41632e-06	-0.66498	-1.79901e-06	-0.66498	-2.21771e-06
-0.66254	-8.08716e-07	-0.66254	-1.14044e-06	-0.66254	-1.40869e-06	-0.66254	-1.78864e-06	-0.66254	-2.2049e-06
-0.6601	-8.04749e-07	-0.6601	-1.13373e-06	-0.6601	-1.40045e-06	-0.6601	-1.77673e-06	-0.6601	-2.19238e-06
-0.65765	-7.9895e-07	-0.65765	-1.12671e-06	-0.65765	-1.39282e-06	-0.65765	-1.76575e-06	-0.65765	-2.17957e-06
-0.65521	-7.95288e-07	-0.65521	-1.1203e-06	-0.65521	-1.38489e-06	-0.65521	-1.75415e-06	-0.65521	-2.16583e-06
-0.65277	-7.89795e-07	-0.65277	-1.11298e-06	-0.65277	-1.37573e-06	-0.65277	-1.74347e-06	-0.65277	-2.15149e-06
-0.65033	-7.85828e-07	-0.65033	-1.10687e-06	-0.65033	-1.3678e-06	-0.65033	-1.73218e-06	-0.65033	-2.13715e-06
-0.64789	-7.79419e-07	-0.64789	-1.09924e-06	-0.64789	-1.35956e-06	-0.64789	-1.71997e-06	-0.64789	-2.12433e-06
-0.64545	-7.74231e-07	-0.64545	-1.09131e-06	-0.64545	-1.35101e-06	-0.64545	-1.7099e-06	-0.64545	-2.1106e-06
-0.64301	-7.70264e-07	-0.64301	-1.08429e-06	-0.64301	-1.34308e-06	-0.64301	-1.698e-06	-0.64301	-2.09686e-06
-0.64056	-7.63855e-07	-0.64056	-1.07819e-06	-0.64056	-1.33423e-06	-0.64056	-1.68762e-06	-0.64056	-2.08313e-06
-0.63812	-7.59888e-07	-0.63812	-1.07086e-06	-0.63812	-1.32599e-06	-0.63812	-1.67603e-06	-0.63812	-2.0694e-06
-0.63568	-7.5531e-07	-0.63568	-1.06415e-06	-0.63568	-1.31775e-06	-0.63568	-1.66443e-06	-0.63568	-2.05627e-06
-0.63324	-7.49512e-07	-0.63324	-1.05713e-06	-0.63324	-1.30981e-06	-0.63324	-1.65344e-06	-0.63324	-2.04102e-06
-0.6308	-7.4585e-07	-0.6308	-1.0498e-06	-0.6308	-1.30005e-06	-0.6308	-1.64246e-06	-0.6308	-2.02789e-06
-0.62836	-7.40662e-07	-0.62836	-1.04279e-06	-0.62836	-1.29211e-06	-0.62836	-1.63025e-06	-0.62836	-2.01477e-06
-0.62592	-7.34863e-07	-0.62592	-1.03577e-06	-0.62592	-1.28418e-06	-0.62592	-1.61896e-06	-0.62592	-1.99982e-06
-0.62347	-7.30591e-07	-0.62347	-1.02814e-06	-0.62347	-1.27472e-06	-0.62347	-1.60767e-06	-0.62347	-1.98639e-06
-0.62103	-7.25403e-07	-0.62103	-1.02142e-06	-0.62103	-1.26709e-06	-0.62103	-1.59607e-06	-0.62103	-1.97296e-06
-0.61859	-7.1991e-07	-0.61859	-1.01471e-06	-0.61859	-1.25824e-06	-0.61859	-1.58508e-06	-0.61859	-1.95953e-06
-0.61615	-7.14417e-07	-0.61615	-1.008e-06	-0.61615	-1.24908e-06	-0.61615	-1.57379e-06	-0.61615	-1.94489e-06
-0.61371	-7.10144e-07	-0.61371	-9.99451e-07	-0.61371	-1.24176e-06	-0.61371	-1.56158e-06	-0.61371	-1.93207e-06
-0.61127	-7.04041e-07	-0.61127	-9.92737e-07	-0.61127	-1.2326e-06	-0.61127	-1.55029e-06	-0.61127	-1.91742e-06
-0.60883	-6.99158e-07	-0.60883	-9.86328e-07	-0.60883	-1.22375e-06	-0.60883	-1.53961e-06	-0.60883	-1.90399e-06
-0.60638	-6.94275e-07	-0.60638	-9.8053e-07	-0.60638	-1.21582e-06	-0.60638	-1.5274e-06	-0.60638	-1.89026e-06
-0.60394	-6.90002e-07	-0.60394	-9.729e-07	-0.60394	-1.20636e-06	-0.60394	-1.5155e-06	-0.60394	-1.87592e-06
-0.6015	-6.84509e-07	-0.6015	-9.65576e-07	-0.6015	-1.19843e-06	-0.6015	-1.50513e-06	-0.6015	-1.86218e-06
-0.59906	-6.79016e-07	-0.59906	-9.57947e-07	-0.59906	-1.18835e-06	-0.59906	-1.49323e-06	-0.59906	-1.84875e-06
-0.59662	-6.73523e-07	-0.59662	-9.50928e-07	-0.59662	-1.18073e-06	-0.59662	-1.48254e-06	-0.59662	-1.83533e-06
-0.59418	-6.6864e-07	-0.59418	-9.43298e-07	-0.59418	-1.17218e-06	-0.59418	-1.47034e-06	-0.59418	-1.82007e-06
-0.59174	-6.64063e-07	-0.59174	-9.3689e-07	-0.59174	-1.16394e-06	-0.59174	-1.45996e-06	-0.59174	-1.80725e-06
-0.58929	-6.58569e-07	-0.58929	-9.2926e-07	-0.58929	-1.15387e-06	-0.58929	-1.44684e-06	-0.58929	-1.79352e-06
-0.58685	-6.53687e-07	-0.58685	-9.22852e-07	-0.58685	-1.14563e-06	-0.58685	-1.43677e-06	-0.58685	-1.78009e-06
-0.58441	-6.48499e-07	-0.58441	-9.16138e-07	-0.58441	-1.13678e-06	-0.58441	-1.42517e-06	-0.58441	-1.76575e-06
-0.58197	-6.43005e-07	-0.58197	-9.07593e-07	-0.58197	-1.12854e-06	-0.58197	-1.41388e-06	-0.58197	-1.75201e-06
-0.57953	-6.37512e-07	-0.57953	-8.99963e-07	-0.57953	-1.11938e-06	-0.57953	-1.40289e-06	-0.57953	-1.73889e-06
-0.57709	-6.3324e-07	-0.57709	-8.92639e-07	-0.57709	-1.11115e-06	-0.57709	-1.3913e-06	-0.57709	-1.72424e-06
-0.57465	-6.27747e-07	-0.57465	-8.8501e-07	-0.57465	-1.10107e-06	-0.57465	-1.3797e-06	-0.57465	-1.71112e-06
-0.5722	-6.22864e-07	-0.5722	-8.7738e-07	-0.5722	-1.09253e-06	-0.5722	-1.36871e-06	-0.5722	-1.69769e-06
-0.56976	-6.16455e-07	-0.56976	-8.70667e-07	-0.56976	-1.08398e-06	-0.56976	-1.35681e-06	-0.56976	-1.68335e-06
-0.56732	-6.12183e-07	-0.56732	-8.63647e-07	-0.56732	-1.07483e-06	-0.56732	-1.34644e-06	-0.56732	-1.67023e-06
-0.56488	-6.073e-07	-0.56488	-8.56018e-07	-0.56488	-1.06628e-06	-0.56488	-1.33423e-06	-0.56488	-1.65466e-06
-0.56244	-6.02112e-07	-0.56244	-8.48083e-07	-0.56244	-1.05774e-06	-0.56244	-1.32324e-06	-0.56244	-1.64154e-06
-0.56	-5.96924e-07	-0.56	-8.41064e-07	-0.56	-1.0495e-06	-0.56	-1.31195e-06	-0.56	-1.62842e-06
-0.55756	-5.91125e-07	-0.55756	-8.34045e-07	-0.55756	-1.04034e-06	-0.55756	-1.30066e-06	-0.55756	-1.61438e-06
-0.55511	-5.86243e-07	-0.55511	-8.26416e-07	-0.55511	-1.03119e-06	-0.55511	-1.28937e-06	-0.55511	-1.59973e-06
-0.55267	-5.81665e-07	-0.55267	-8.18787e-07	-0.55267	-1.02203e-06	-0.55267	-1.27838e-06	-0.55267	-1.5863e-06
-0.55023	-5.74646e-07	-0.55023	-8.10852e-07	-0.55023	-1.01318e-06	-0.55023	-1.26617e-06	-0.55023	-1.57257e-06
-0.54779	-5.70068e-07	-0.54779	-8.04138e-07	-0.54779	-1.00433e-06	-0.54779	-1.2558e-06	-0.54779	-1.55945e-06
-0.54535	-5.6488e-07	-0.54535	-7.96509e-07	-0.54535	-9.96399e-07	-0.54535	-1.2439e-06	-0.54535	-1.5448e-06
-0.54291	-5.59082e-07	-0.54291	-7.89795e-07	-0.54291	-9.86328e-07	-0.54291	-1.2326e-06	-0.54291	-1.53076e-06
-0.54047	-5.54199e-07	-0.54047	-7.82166e-07	-0.54047	-9.78088e-07	-0.54047	-1.22192e-06	-0.54047	-1.51794e-06
-0.53802	-5.48706e-07	-0.53802	-7.74536e-07	-0.53802	-9.68628e-07	-0.53802	-1.21002e-06	-0.53802	-1.50482e-06
-0.53558	-5.44434e-07	-0.53558	-7.67212e-07	-0.53558	-9.60083e-07	-0.53558	-1.19904e-06	-0.53558	-1.48987e-06
-0.53314	-5.3772e-07	-0.53314	-7.60498e-07	-0.53314	-9.50623e-07	-0.53314	-1.18835e-06	-0.53314	-1.47766e-06
-0.5307	-5.32837e-07	-0.5307	-7.52563e-07	-0.5307	-9.41772e-07	-0.5307	-1.17645e-06	-0.5307	-1.46362e-06
-0.52826	-5.27649e-07	-0.52826	-7.44934e-07	-0.52826	-9.33228e-07	-0.52826	-1.16577e-06	-0.52826	-1.44958e-06
-0.52582	-5.22766e-07	-0.52582	-7.37915e-07	-0.52582	-9.24377e-07	-0.52582	-1.15479e-06	-0.52582	-1.43707e-06
-0.52338	-5.18494e-07	-0.52338	-7.31812e-07	-0.52338	-9.15833e-07	-0.52338	-1.1441e-06	-0.52338	-1.42242e-06
-0.52094	-5.1239e-07	-0.52094	-7.23267e-07	-0.52094	-9.06067e-07	-0.52094	-1.13312e-06	-0.52094	-1.4093e-06
-0.51849	-5.05981e-07	-0.51849	-7.16248e-07	-0.51849	-8.97827e-07	-0.51849	-1.12183e-06	-0.51849	-1.39587e-06
-0.51605	-5.01709e-07	-0.51605	-7.08923e-07	-0.51605	-8.88672e-07	-0.51605	-1.10962e-06	-0.51605	-1.38275e-06
-0.51361	-4.96216e-07	-0.51361	-7.02209e-07	-0.51361	-8.79822e-07	-0.51361	-1.09955e-06	-0.51361	-1.36963e-06
-0.51117	-4.90417e-07	-0.51117	-6.94885e-07	-0.51117	-8.71277e-07	-0.51117	-1.08856e-06	-0.51117	-1.35681e-06
-0.50873	-4.8584e-07	-0.50873	-6.87561e-07	-0.50873	-8.62427e-07	-0.50873	-1.07849e-06	-0.50873	-1.34247e-06
-0.50629	-4.79126e-07	-0.50629	-6.80237e-07	-0.50629	-8.53577e-07	-0.50629	-1.06781e-06	-0.50629	-1.32904e-06
-0.50385	-4.75464e-07	-0.50385	-6.72607e-07	-0.50385	-8.44727e-07	-0.50385	-1.05652e-06	-0.50385	-1.31683e-06
-0.5014	-4.68719e-07	-0.5014	-6.65283e-07	-0.5014	-8.36182e-07	-0.5014	-1.04614e-06	-0.5014	-1.30371e-06
-0.49896	-4.63776e-07	-0.49896	-6.58264e-07	-0.49896	-8.27332e-07	-0.49896	-1.03577e-06	-0.49896	-1.29089e-06
-0.49652	-4.58313e-07	-0.49652	-6.5094e-07	-0.49652	-8.17871e-07	-0.49652	-1.02386e-06	-0.49652	-1.27625e-06
-0.49408	-4.53033e-07	-0.49408	-6.44531e-07	-0.49408	-8.10242e-07	-0.49408	-1.01379e-06	-0.49408	-1.26373e-06
-0.49164	-4.4751e-07	-0.49164	-6.35986e-07	-0.49164	-8.01392e-07	-0.49164	-1.00281e-06	-0.49164	-1.25031e-06
-0.4892	-4.42596e-07	-0.4892	-6.29578e-07	-0.4892	-7.91931e-07	-0.4892	-9.91516e-07	-0.4892	-1.23779e-06
-0.48676	-4.37012e-07	-0.48676	-6.21948e-07	-0.48676	-7.83997e-07	-0.48676	-9.81445e-07	-0.48676	-1.22498e-06
-0.48431	-4.31824e-07	-0.48431	-6.14624e-07	-0.48431	-7.75757e-07	-0.48431	-9.70154e-07	-0.48431	-1.21216e-06
-0.48187	-4.2691e-07	-0.48187	-6.07605e-07	-0.48187	-7.66907e-07	-0.48187	-9.59778e-07	-0.48187	-1.19904e-06
-0.47943	-4.21387e-07	-0.47943	-6.00586e-07	-0.47943	-7.58362e-07	-0.47943	-9.50012e-07	-0.47943	-1.18561e-06
-0.47699	-4.16077e-07	-0.47699	-5.92346e-07	-0.47699	-7.49207e-07	-0.47699	-9.39331e-07	-0.47699	-1.1734e-06
-0.47455	-4.10797e-07	-0.47455	-5.86243e-07	-0.47455	-7.39746e-07	-0.47455	-9.28345e-07	-0.47455	-1.15936e-06
-0.47211	-4.05426e-07	-0.47211	-5.79529e-07	-0.47211	-7.31506e-07	-0.47211	-9.18274e-07	-0.47211	-1.14746e-06
-0.46967	-4.00574e-07	-0.46967	-5.71594e-07	-0.46967	-7.23267e-07	-0.46967	-9.07898e-07	-0.46967	-1.13403e-06
-0.46722	-3.95447e-07	-0.46722	-5.6488e-07	-0.46722	-7.14417e-07	-0.46722	-8.97522e-07	-0.46722	-1.12213e-06
-0.46478	-3.9035e-07	-0.46478	-5.57556e-07	-0.46478	-7.06482e-07	-0.46478	-8.87146e-07	-0.46478	-1.10901e-06
-0.46234	-3.84949e-07	-0.46234	-5.50842e-07	-0.46234	-6.97937e-07	-0.46234	-8.7738e-07	-0.46234	-1.09619e-06
-0.4599	-3.80249e-07	-0.4599	-5.43518e-07	-0.4599	-6.89392e-07	-0.4599	-8.67004e-07	-0.4599	-1.08368e-06
-0.45746	-3.74847e-07	-0.45746	-5.36804e-07	-0.45746	-6.80847e-07	-0.45746	-8.55713e-07	-0.45746	-1.07117e-06
-0.45502	-3.70056e-07	-0.45502	-5.29785e-07	-0.45502	-6.73218e-07	-0.45502	-8.46558e-07	-0.45502	-1.05865e-06
-0.45258	-3.64258e-07	-0.45258	-5.23071e-07	-0.45258	-6.64368e-07	-0.45258	-8.36182e-07	-0.45258	-1.04584e-06
-0.45013	-3.59528e-07	-0.45013	-5.16663e-07	-0.45013	-6.55823e-07	-0.45013	-8.26416e-07	-0.45013	-1.03333e-06
-0.44769	-3.54309e-07	-0.44769	-5.09338e-07	-0.44769	-6.46362e-07	-0.44769	-8.15125e-07	-0.44769	-1.02051e-06
-0.44525	-3.49274e-07	-0.44525	-5.02014e-07	-0.44525	-6.39038e-07	-0.44525	-8.06274e-07	-0.44525	-1.00952e-06
-0.44281	-3.44574e-07	-0.44281	-4.95605e-07	-0.44281	-6.30493e-07	-0.44281	-7.95593e-07	-0.44281	-9.95178e-07
-0.44037	-3.39142e-07	-0.44037	-4.89197e-07	-0.44037	-6.22253e-07	-0.44037	-7.85217e-07	-0.44037	-9.83887e-07
-0.43793	-3.33954e-07	-0.43793	-4.82178e-07	-0.43793	-6.14014e-07	-0.43793	-7.75757e-07	-0.43793	-9.71069e-07
-0.43549	-3.28857e-07	-0.43549	-4.73328e-07	-0.43549	-6.05774e-07	-0.43549	-7.65686e-07	-0.43549	-9.58557e-07
-0.43304	-3.24188e-07	-0.43304	-4.67529e-07	-0.43304	-5.97229e-07	-0.43304	-7.5531e-07	-0.43304	-9.4635e-07
-0.4306	-3.19733e-07	-0.4306	-4.61243e-07	-0.4306	-5.88684e-07	-0.4306	-7.4646e-07	-0.4306	-9.34753e-07
-0.42816	-3.15033e-07	-0.42816	-4.54285e-07	-0.42816	-5.8075e-07	-0.42816	-7.36389e-07	-0.42816	-9.21631e-07
-0.42572	-3.09937e-07	-0.42572	-4.47449e-07	-0.42572	-5.73425e-07	-0.42572	-7.26624e-07	-0.42572	-9.11255e-07
-0.42328	-3.04474e-07	-0.42328	-4.41132e-07	-0.42328	-5.65491e-07	-0.42328	-7.16858e-07	-0.42328	-8.99048e-07
-0.42084	-2.99866e-07	-0.42084	-4.34174e-07	-0.42084	-5.57556e-07	-0.42084	-7.07397e-07	-0.42084	-8.86536e-07
-0.4184	-2.94678e-07	-0.4184	-4.27063e-07	-0.4184	-5.49011e-07	-0.4184	-6.96716e-07	-0.4184	-8.73718e-07
-0.41595	-2.89917e-07	-0.41595	-4.21173e-07	-0.41595	-5.40771e-07	-0.41595	-6.87866e-07	-0.41595	-8.61511e-07
-0.41351	-2.85187e-07	-0.41351	-4.13605e-07	-0.41351	-5.33752e-07	-0.41351	-6.78711e-07	-0.41351	-8.5022e-07
-0.41107	-2.80609e-07	-0.41107	-4.07684e-07	-0.41107	-5.26123e-07	-0.41107	-6.68335e-07	-0.41107	-8.38623e-07
-0.40863	-2.75421e-07	-0.40863	-4.01428e-07	-0.40863	-5.16968e-07	-0.40863	-6.60095e-07	-0.40863	-8.26721e-07
-0.40619	-2.70844e-07	-0.40619	-3.9444e-07	-0.40619	-5.10559e-07	-0.40619	-6.5033e-07	-0.40619	-8.14514e-07
-0.40375	-2.65778e-07	-0.40375	-3.88306e-07	-0.40375	-5.01404e-07	-0.40375	-6.40564e-07	-0.40375	-8.02612e-07
-0.40131	-2.61688e-07	-0.40131	-3.8266e-07	-0.40131	-4.94385e-07	-0.40131	-6.31409e-07	-0.40131	-7.91931e-07
-0.39886	-2.56531e-07	-0.39886	-3.75763e-07	-0.39886	-4.8584e-07	-0.39886	-6.21948e-07	-0.39886	-7.80334e-07
-0.39642	-2.52411e-07	-0.39642	-3.70392e-07	-0.39642	-4.7821e-07	-0.39642	-6.12793e-07	-0.39642	-7.67822e-07
-0.39398	-2.47467e-07	-0.39398	-3.64349e-07	-0.39398	-4.71191e-07	-0.39398	-6.03943e-07	-0.39398	-7.57446e-07
-0.39154	-2.43103e-07	-0.39154	-3.58032e-07	-0.39154	-4.62646e-07	-0.39154	-5.94482e-07	-0.39154	-7.4585e-07
-0.3891	-2.38861e-07	-0.3891	-3.51929e-07	-0.3891	-4.55353e-07	-0.3891	-5.86243e-07	-0.3891	-7.34863e-07
-0.38666	-2.33704e-07	-0.38666	-3.45978e-07	-0.38666	-4.48486e-07	-0.38666	-5.76477e-07	-0.38666	-7.23877e-07
-0.38422	-2.30011e-07	-0.38422	-3.39752e-07	-0.38422	-4.40765e-07	-0.38422	-5.67932e-07	-0.38422	-7.11975e-07
-0.38177	-2.24762e-07	-0.38177	-3.34259e-07	-0.38177	-4.33502e-07	-0.38177	-5.59387e-07	-0.38177	-7.00073e-07
-0.37933	-2.20154e-07	-0.37933	-3.28369e-07	-0.37933	-4.25934e-07	-0.37933	-5.50537e-07	-0.37933	-6.90613e-07
-0.37689	-2.16095e-07	-0.37689	-3.23151e-07	-0.37689	-4.19525e-07	-0.37689	-5.42297e-07	-0.37689	-6.79932e-07
-0.37445	-2.11731e-07	-0.37445	-3.16956e-07	-0.37445	-4.11926e-07	-0.37445	-5.33142e-07	-0.37445	-6.6925e-07
-0.37201	-2.07489e-07	-0.37201	-3.11035e-07	-0.37201	-4.05304e-07	-0.37201	-5.24902e-07	-0.37201	-6.57654e-07
-0.36957	-2.02454e-07	-0.36957	-3.04779e-07	-0.36957	-3.97644e-07	-0.36957	-5.16357e-07	-0.36957	-6.45752e-07
-0.36713	-1.98547e-07	-0.36713	-2.99866e-07	-0.36713	-3.91083e-07	-0.36713	-5.06897e-07	-0.36713	-6.36597e-07
-0.36469	-1.94641e-07	-0.36469	-2.94708e-07	-0.36469	-3.8382e-07	-0.36469	-4.98047e-07	-0.36469	-6.25916e-07
-0.36224	-1.90491e-07	-0.36224	-2.88757e-07	-0.36224	-3.7735e-07	-0.36224	-4.90723e-07	-0.36224	-6.15845e-07
-0.3598	-1.85852e-07	-0.3598	-2.83173e-07	-0.3598	-3.69751e-07	-0.3598	-4.82178e-07	-0.3598	-6.05774e-07
-0.35736	-1.82281e-07	-0.35736	-2.78015e-07	-0.35736	-3.6322e-07	-0.35736	-4.73328e-07	-0.35736	-5.94788e-07
-0.35492	-1.78101e-07	-0.35492	-2.72186e-07	-0.35492	-3.5675e-07	-0.35492	-4.66309e-07	-0.35492	-5.83496e-07
-0.35248	-1.7395e-07	-0.35248	-2.67212e-07	-0.35248	-3.50006e-07	-0.35248	-4.56696e-07	-0.35248	-5.74341e-07
-0.35004	-1.7041e-07	-0.35004	-2.6181e-07	-0.35004	-3.44025e-07	-0.35004	-4.48425e-07	-0.35004	-5.65186e-07
-0.3476	-1.65924e-07	-0.3476	-2.56226e-07	-0.3476	-3.37555e-07	-0.3476	-4.40826e-07	-0.3476	-5.53894e-07
-0.34515	-1.61896e-07	-0.34515	-2.51099e-07	-0.34515	-3.30902e-07	-0.34515	-4.32465e-07	-0.34515	-5.43518e-07
-0.34271	-1.58325e-07	-0.34271	-2.44965e-07	-0.34271	-3.24371e-07	-0.34271	-4.24805e-07	-0.34271	-5.34058e-07
-0.34027	-1.54175e-07	-0.34027	-2.40387e-07	-0.34027	-3.18085e-07	-0.34027	-4.16718e-07	-0.34027	-5.24597e-07
-0.33783	-1.50208e-07	-0.33783	-2.3587e-07	-0.33783	-3.12256e-07	-0.33783	-4.09241e-07	-0.33783	-5.14526e-07
-0.33539	-1.46545e-07	-0.33539	-2.30316e-07	-0.33539	-3.05542e-07	-0.33539	-4.01398e-07	-0.33539	-5.0415e-07
-0.33295	-1.42853e-07	-0.33295	-2.25006e-07	-0.33295	-2.99591e-07	-0.33295	-3.94318e-07	-0.33295	-4.95605e-07
-0.33051	-1.39404e-07	-0.33051	-2.19727e-07	-0.33051	-2.93304e-07	-0.33051	-3.86414e-07	-0.33051	-4.85229e-07
-0.32806	-1.35834e-07	-0.32806	-2.15271e-07	-0.32806	-2.87476e-07	-0.32806	-3.79639e-07	-0.32806	-4.77905e-07
-0.32562	-1.32172e-07	-0.32562	-2.10052e-07	-0.32562	-2.81342e-07	-0.32562	-3.71918e-07	-0.32562	-4.65698e-07
-0.32318	-1.28601e-07	-0.32318	-2.05658e-07	-0.32318	-2.75513e-07	-0.32318	-3.65021e-07	-0.32318	-4.57458e-07
-0.32074	-1.24908e-07	-0.32074	-2.00195e-07	-0.32074	-2.69318e-07	-0.32074	-3.57361e-07	-0.32074	-4.48181e-07
-0.3183	-1.21033e-07	-0.3183	-1.95923e-07	-0.3183	-2.63916e-07	-0.3183	-3.5083e-07	-0.3183	-4.39301e-07
-0.31586	-1.17584e-07	-0.31586	-1.90674e-07	-0.31586	-2.58087e-07	-0.31586	-3.43536e-07	-0.31586	-4.30206e-07
-0.31342	-1.13953e-07	-0.31342	-1.86462e-07	-0.31342	-2.52747e-07	-0.31342	-3.36853e-07	-0.31342	-4.21997e-07
-0.31097	-1.10657e-07	-0.31097	-1.81458e-07	-0.31097	-2.46613e-07	-0.31097	-3.2962e-07	-0.31097	-4.12842e-07
-0.30853	-1.07178e-07	-0.30853	-1.77063e-07	-0.30853	-2.41455e-07	-0.30853	-3.22845e-07	-0.30853	-4.04663e-07
-0.30609	-1.04156e-07	-0.30609	-1.7215e-07	-0.30609	-2.35504e-07	-0.30609	-3.16376e-07	-0.30609	-3.95477e-07
-0.30365	-1.00464e-07	-0.30365	-1.67664e-07	-0.30365	-2.30255e-07	-0.30365	-3.09875e-07	-0.30365	-3.86719e-07
-0.30121	-9.73511e-08	-0.30121	-1.63147e-07	-0.30121	-2.25159e-07	-0.30121	-3.03192e-07	-0.30121	-3.77777e-07
-0.29877	-9.39026e-08	-0.29877	-1.59088e-07	-0.29877	-2.19299e-07	-0.29877	-2.96204e-07	-0.29877	-3.6969e-07
-0.29633	-9.09119e-08	-0.29633	-1.54877e-07	-0.29633	-2.13745e-07	-0.29633	-2.89673e-07	-0.29633	-3.61389e-07
-0.29388	-8.78296e-08	-0.29388	-1.51062e-07	-0.29388	-2.09106e-07	-0.29388	-2.83722e-07	-0.29388	-3.53821e-07
-0.29144	-8.45032e-08	-0.29144	-1.46667e-07	-0.29144	-2.03705e-07	-0.29144	-2.76947e-07	-0.29144	-3.45062e-07
-0.289	-8.20313e-08	-0.289	-1.4328e-07	-0.289	-1.9873e-07	-0.289	-2.71179e-07	-0.289	-3.38165e-07
-0.28656	-7.87964e-08	-0.28656	-1.38214e-07	-0.28656	-1.93848e-07	-0.28656	-2.6532e-07	-0.28656	-3.29895e-07
-0.28412	-7.58667e-08	-0.28412	-1.35132e-07	-0.28412	-1.88965e-07	-0.28412	-2.59369e-07	-0.28412	-3.22479e-07
-0.28168	-7.24182e-08	-0.28168	-1.31165e-07	-0.28168	-1.8396e-07	-0.28168	-2.52838e-07	-0.28168	-3.14423e-07
-0.27924	-6.97632e-08	-0.27924	-1.27289e-07	-0.27924	-1.79382e-07	-0.27924	-2.47375e-07	-0.27924	-3.06885e-07
-0.27679	-6.65283e-08	-0.27679	-1.23108e-07	-0.27679	-1.74438e-07	-0.27679	-2.41058e-07	-0.27679	-2.99438e-07
-0.27435	-6.44836e-08	-0.27435	-1.19202e-07	-0.27435	-1.69525e-07	-0.27435	-2.3587e-07	-0.27435	-2.92175e-07
-0.27191	-6.12488e-08	-0.27191	-1.15387e-07	-0.27191	-1.65283e-07	-0.27191	-2.2998e-07	-0.27191	-2.84271e-07
-0.26947	-5.82886e-08	-0.26947	-1.11664e-07	-0.26947	-1.60736e-07	-0.26947	-2.24365e-07	-0.26947	-2.7771e-07
-0.26703	-5.55725e-08	-0.26703	-1.08429e-07	-0.26703	-1.56006e-07	-0.26703	-2.18689e-07	-0.26703	-2.70111e-07
-0.26459	-5.27954e-08	-0.26459	-1.04248e-07	-0.26459	-1.51611e-07	-0.26459	-2.13043e-07	-0.26459	-2.63458e-07
-0.26215	-4.95911e-08	-0.26215	-9.99756e-08	-0.26215	-1.4682e-07	-0.26215	-2.07611e-07	-0.26215	-2.55829e-07
-0.2597	-4.71497e-08	-0.2597	-9.70764e-08	-0.2597	-1.42517e-07	-0.2597	-2.0282e-07	-0.2597	-2.49451e-07
-0.25726	-4.4342e-08	-0.25726	-9.35669e-08	-0.25726	-1.3855e-07	-0.25726	-1.97021e-07	-0.25726	-2.41913e-07
-0.25482	-4.17786e-08	-0.25482	-8.97217e-08	-0.25482	-1.33911e-07	-0.25482	-1.92047e-07	-0.25482	-2.35199e-07
-0.25238	-3.86047e-08	-0.25238	-8.61511e-08	-0.25238	-1.29761e-07	-0.25238	-1.86798e-07	-0.25238	-2.28027e-07
-0.24994	-3.61328e-08	-0.24994	-8.37708e-08	-0.24994	-1.25702e-07	-0.24994	-1.81946e-07	-0.24994	-2.22168e-07
-0.2475	-3.37219e-08	-0.2475	-8.04443e-08	-0.2475	-1.21643e-07	-0.2475	-1.76727e-07	-0.2475	-2.15637e-07
-0.24506	-3.1311e-08	-0.24506	-7.69348e-08	-0.24506	-1.17889e-07	-0.24506	-1.72089e-07	-0.24506	-2.08588e-07
-0.24261	-2.84424e-08	-0.24261	-7.34863e-08	-0.24261	-1.14014e-07	-0.24261	-1.66656e-07	-0.24261	-2.01996e-07
-0.24017	-2.63062e-08	-0.24017	-7.05261e-08	-0.24017	-1.10229e-07	-0.24017	-1.62201e-07	-0.24017	-1.95251e-07
-0.23773	-2.42004e-08	-0.23773	-6.75049e-08	-0.23773	-1.06018e-07	-0.23773	-1.57349e-07	-0.23773	-1.88873e-07
-0.23529	-2.21863e-08	-0.23529	-6.5033e-08	-0.23529	-1.02356e-07	-0.23529	-1.5274e-07	-0.23529	-1.83044e-07
-0.23285	-1.92871e-08	-0.23285	-6.15845e-08	-0.23285	-9.84802e-08	-0.23285	-1.48071e-07	-0.23285	-1.76361e-07
-0.23041	-1.74561e-08	-0.23041	-5.88379e-08	-0.23041	-9.43909e-08	-0.23041	-1.43402e-07	-0.23041	-1.70898e-07
-0.22797	-1.48926e-08	-0.22797	-5.62744e-08	-0.22797	-9.08203e-08	-0.22797	-1.39282e-07	-0.22797	-1.64307e-07
-0.22552	-1.29089e-08	-0.22552	-5.29175e-08	-0.22552	-8.75549e-08	-0.22552	-1.34613e-07	-0.22552	-1.58691e-07
-0.22308	-1.06812e-08	-0.22308	-4.90417e-08	-0.22308	-8.36182e-08	-0.22308	-1.30707e-07	-0.22308	-1.52069e-07
-0.22064	-8.54492e-09	-0.22064	-4.70886e-08	-0.22064	-8.02307e-08	-0.22064	-1.26099e-07	-0.22064	-1.46973e-07
-0.2182	-6.50024e-09	-0.2182	-4.44031e-08	-0.2182	-7.66907e-08	-0.2182	-1.21399e-07	-0.2182	-1.40656e-07
-0.21576	-4.73022e-09	-0.21576	-4.22668e-08	-0.21576	-7.33643e-08	-0.21576	-1.1792e-07	-0.21576	-1.34827e-07
-0.21332	-2.20947e-09	-0.21332	-3.92456e-08	-0.21332	-7.0343e-08	-0.21332	-1.13129e-07	-0.21332	-1.29364e-07
-0.21088	-4.88281e-10	-0.21088	-3.70789e-08	-0.21088	-6.71082e-08	-0.21088	-1.09161e-07	-0.21088	-1.23993e-07
-0.20844	1.61133e-09	-0.20844	-3.43628e-08	-0.20844	-6.42395e-08	-0.20844	-1.05621e-07	-0.20844	-1.18347e-07
-0.20599	3.58887e-09	-0.20599	-3.18604e-08	-0.20599	-6.14319e-08	-0.20599	-1.01715e-07	-0.20599	-1.12854e-07
-0.20355	5.64575e-09	-0.20355	-2.83813e-08	-0.20355	-5.81055e-08	-0.20355	-9.70154e-08	-0.20355	-1.07605e-07
-0.20111	7.51343e-09	-0.20111	-2.66113e-08	-0.20111	-5.48401e-08	-0.20111	-9.35669e-08	-0.20111	-1.02264e-07
-0.19867	9.24683e-09	-0.19867	-2.41394e-08	-0.19867	-5.23071e-08	-0.19867	-8.99048e-08	-0.19867	-9.6405e-08
-0.19623	1.12e-08	-0.19623	-2.1637e-08	-0.19623	-4.88281e-08	-0.19623	-8.58765e-08	-0.19623	-9.198e-08
-0.19379	1.32446e-08	-0.19379	-1.92261e-08	-0.19379	-4.60205e-08	-0.19379	-8.26721e-08	-0.19379	-8.68225e-08
-0.19135	1.49536e-08	-0.19135	-1.6571e-08	-0.19135	-4.32129e-08	-0.19135	-7.88269e-08	-0.19135	-8.15735e-08
-0.1889	1.651e-08	-0.1889	-1.42822e-08	-0.1889	-4.02832e-08	-0.1889	-7.51343e-08	-0.1889	-7.65991e-08
-0.18646	1.81274e-08	-0.18646	-1.17188e-08	-0.18646	-3.7262e-08	-0.18646	-7.18994e-08	-0.18646	-7.18689e-08
-0.18402	2.02942e-08	-0.18402	-9.3689e-09	-0.18402	-3.40271e-08	-0.18402	-6.84509e-08	-0.18402	-6.66199e-08
-0.18158	2.1759e-08	-0.18158	-7.56836e-09	-0.18158	-3.11584e-08	-0.18158	-6.49109e-08	-0.18158	-6.21643e-08
-0.17914	2.33765e-08	-0.17914	-4.88281e-09	-0.17914	-2.82898e-08	-0.17914	-6.13403e-08	-0.17914	-5.68237e-08
-0.1767	2.49329e-08	-0.1767	-3.20129e-09	-0.1767	-2.59705e-08	-0.1767	-5.85938e-08	-0.1767	-5.20325e-08
-0.17426	2.70996e-08	-0.17426	-5.85938e-10	-0.17426	-2.27661e-08	-0.17426	-5.52368e-08	-0.17426	-4.67529e-08
-0.17181	2.82898e-08	-0.17181	8.8501e-10	-0.17181	-2.09351e-08	-0.17181	-5.14832e-08	-0.17181	-4.245e-08
-0.16937	3.02429e-08	-0.16937	2.80762e-09	-0.16937	-1.828e-08	-0.16937	-4.80347e-08	-0.16937	-3.72009e-08
-0.16693	3.21655e-08	-0.16693	5.24902e-09	-0.16693	-1.59302e-08	-0.16693	-4.48303e-08	-0.16693	-3.31726e-08
-0.16449	3.38745e-08	-0.16449	7.2937e-09	-0.16449	-1.25732e-08	-0.16449	-4.13818e-08	-0.16449	-2.78931e-08
-0.16205	3.51257e-08	-0.16205	9.0332e-09	-0.16205	-1.04675e-08	-0.16205	-3.80859e-08	-0.16205	-2.32849e-08
-0.15961	3.75977e-08	-0.15961	1.08337e-08	-0.15961	-8.69751e-09	-0.15961	-3.4668e-08	-0.15961	-1.90735e-08
-0.15717	3.89099e-08	-0.15717	1.25427e-08	-0.15717	-6.16455e-09	-0.15717	-3.18909e-08	-0.15717	-1.53503e-08
-0.15472	4.06494e-08	-0.15472	1.50146e-08	-0.15472	-3.96729e-09	-0.15472	-2.90527e-08	-0.15472	-1.10779e-08
-0.15228	4.22363e-08	-0.15228	1.58691e-08	-0.15228	-1.31226e-09	-0.15228	-2.55737e-08	-0.15228	-7.50732e-09
-0.14984	4.40979e-08	-0.14984	1.82495e-08	-0.14984	6.71387e-10	-0.14984	-2.29492e-08	-0.14984	-2.86865e-09
-0.1474	4.51355e-08	-0.1474	2.06299e-08	-0.1474	2.83813e-09	-0.1474	-2.04468e-08	-0.1474	1.0376e-09
-0.14496	4.72107e-08	-0.14496	2.31628e-08	-0.14496	5.40161e-09	-0.14496	-1.73035e-08	-0.14496	5.15747e-09
-0.14252	4.88281e-08	-0.14252	2.46887e-08	-0.14252	7.65991e-09	-0.14252	-1.45874e-08	-0.14252	8.8501e-09
-0.14008	5.05066e-08	-0.14008	2.6825e-08	-0.14008	9.8877e-09	-0.14008	-1.16272e-08	-0.14008	1.36719e-08
-0.13763	5.15747e-08	-0.13763	2.80151e-08	-0.13763	1.20239e-08	-0.13763	-9.49097e-09	-0.13763	1.79138e-08
-0.13519	5.32837e-08	-0.13519	3.01514e-08	-0.13519	1.42212e-08	-0.13519	-6.37817e-09	-0.13519	2.15759e-08
-0.13275	5.49316e-08	-0.13275	3.16467e-08	-0.13275	1.58997e-08	-0.13275	-3.57056e-09	-0.13275	2.53296e-08
-0.13031	5.6366e-08	-0.13031	3.38745e-08	-0.13031	1.81274e-08	-0.13031	-1.28174e-09	-0.13031	2.98767e-08
-0.12787	5.78308e-08	-0.12787	3.55835e-08	-0.12787	1.98669e-08	-0.12787	1.46179e-09	-0.12787	3.42407e-08
-0.12543	5.92346e-08	-0.12543	3.80859e-08	-0.12543	2.24304e-08	-0.12543	3.96729e-09	-0.12543	3.79639e-08
-0.12299	6.03333e-08	-0.12299	3.92151e-08	-0.12299	2.4353e-08	-0.12299	6.50024e-09	-0.12299	4.14124e-08
-0.12054	6.19812e-08	-0.12054	4.11072e-08	-0.12054	2.59705e-08	-0.12054	9.33838e-09	-0.12054	4.61731e-08
-0.1181	6.26221e-08	-0.1181	4.31824e-08	-0.1181	2.89307e-08	-0.1181	1.10779e-08	-0.1181	4.95911e-08
-0.11566	6.46973e-08	-0.11566	4.50745e-08	-0.11566	3.08533e-08	-0.11566	1.43738e-08	-0.11566	5.40161e-08
-0.11322	6.62231e-08	-0.11322	4.66309e-08	-0.11322	3.29285e-08	-0.11322	1.62659e-08	-0.11322	5.74646e-08
-0.11078	6.69861e-08	-0.11078	4.81262e-08	-0.11078	3.48816e-08	-0.11078	1.87378e-08	-0.11078	6.10046e-08
-0.10834	6.80237e-08	-0.10834	5.00488e-08	-0.10834	3.69873e-08	-0.10834	2.12708e-08	-0.10834	6.45447e-08
-0.1059	7.00684e-08	-0.1059	5.16663e-08	-0.1059	3.97644e-08	-0.1059	2.34375e-08	-0.1059	6.87866e-08
-0.10345	7.07703e-08	-0.10345	5.2887e-08	-0.10345	4.15344e-08	-0.10345	2.61841e-08	-0.10345	7.15942e-08
-0.10101	7.22961e-08	-0.10101	5.40771e-08	-0.10101	4.31519e-08	-0.10101	2.8595e-08	-0.10101	7.66602e-08
-0.09857	7.31506e-08	-0.09857	5.61523e-08	-0.09857	4.51355e-08	-0.09857	3.09753e-08	-0.09857	7.95898e-08
-0.09613	7.53479e-08	-0.09613	5.73425e-08	-0.09613	4.776e-08	-0.09613	3.33252e-08	-0.09613	8.37402e-08
-0.09369	7.61414e-08	-0.09369	5.86853e-08	-0.09369	4.953e-08	-0.09369	3.54919e-08	-0.09369	8.71887e-08
-0.09125	7.724e-08	-0.09125	6.06079e-08	-0.09125	5.15137e-08	-0.09125	3.80859e-08	-0.09125	9.03931e-08
-0.08881	7.85828e-08	-0.08881	6.21643e-08	-0.08881	5.35278e-08	-0.08881	4.0863e-08	-0.08881	9.43909e-08
-0.08636	7.9834e-08	-0.08636	6.33545e-08	-0.08636	5.59082e-08	-0.08636	4.31824e-08	-0.08636	9.80225e-08
-0.08392	8.11768e-08	-0.08392	6.48193e-08	-0.08392	5.7373e-08	-0.08392	4.52881e-08	-0.08392	1.01379e-07
-0.08148	8.22449e-08	-0.08148	6.60095e-08	-0.08148	5.92957e-08	-0.08148	4.7821e-08	-0.08148	1.06049e-07
-0.07904	8.30383e-08	-0.07904	6.74133e-08	-0.07904	6.06689e-08	-0.07904	5.0293e-08	-0.07904	1.08673e-07
-0.0766	8.46558e-08	-0.0766	6.89087e-08	-0.0766	6.24695e-08	-0.0766	5.22766e-08	-0.0766	1.12885e-07
-0.07416	8.56628e-08	-0.07416	7.00684e-08	-0.07416	6.47278e-08	-0.07416	5.48401e-08	-0.07416	1.16302e-07
-0.07172	8.72803e-08	-0.07172	7.16248e-08	-0.07172	6.63147e-08	-0.07172	5.70068e-08	-0.07172	1.19904e-07
-0.06927	8.81958e-08	-0.06927	7.27539e-08	-0.06927	6.75049e-08	-0.06927	5.95093e-08	-0.06927	1.2442e-07
-0.06683	9.00269e-08	-0.06683	7.48901e-08	-0.06683	6.94885e-08	-0.06683	6.17676e-08	-0.06683	1.27869e-07
-0.06439	9.08508e-08	-0.06439	7.6355e-08	-0.06439	7.09534e-08	-0.06439	6.39343e-08	-0.06439	1.31775e-07
-0.06195	9.22546e-08	-0.06195	7.79114e-08	-0.06195	7.28455e-08	-0.06195	6.61316e-08	-0.06195	1.35284e-07
-0.05951	9.33533e-08	-0.05951	7.96204e-08	-0.05951	7.4585e-08	-0.05951	6.81152e-08	-0.05951	1.39221e-07
-0.05707	9.49402e-08	-0.05707	8.09631e-08	-0.05707	7.60498e-08	-0.05707	7.05261e-08	-0.05707	1.43555e-07
-0.05463	9.57947e-08	-0.05463	8.27026e-08	-0.05463	7.74536e-08	-0.05463	7.25098e-08	-0.05463	1.47186e-07
-0.05219	9.68933e-08	-0.05219	8.41064e-08	-0.05219	7.95288e-08	-0.05219	7.48596e-08	-0.05219	1.51367e-07
-0.04974	9.83887e-08	-0.04974	8.54187e-08	-0.04974	8.08105e-08	-0.04974	7.65381e-08	-0.04974	1.54633e-07
-0.0473	9.92737e-08	-0.0473	8.70667e-08	-0.0473	8.255e-08	-0.0473	7.92236e-08	-0.0473	1.586e-07
-0.04486	1.00525e-07	-0.04486	8.84399e-08	-0.04486	8.4259e-08	-0.04486	8.13599e-08	-0.04486	1.62994e-07
-0.04242	1.01929e-07	-0.04242	8.98438e-08	-0.04242	8.58765e-08	-0.04242	8.38013e-08	-0.04242	1.66565e-07
-0.03998	1.02783e-07	-0.03998	9.10645e-08	-0.03998	8.75549e-08	-0.03998	8.56628e-08	-0.03998	1.70258e-07
-0.03754	1.04004e-07	-0.03754	9.26819e-08	-0.03754	8.95386e-08	-0.03754	8.83789e-08	-0.03754	1.74011e-07
-0.0351	1.05499e-07	-0.0351	9.34753e-08	-0.0351	9.13086e-08	-0.0351	9.04236e-08	-0.0351	1.77307e-07
-0.03265	1.06598e-07	-0.03265	9.52759e-08	-0.03265	9.30481e-08	-0.03265	9.22546e-08	-0.03265	1.81183e-07
-0.03021	1.07941e-07	-0.03021	9.64661e-08	-0.03021	9.49097e-08	-0.03021	9.47266e-08	-0.03021	1.84967e-07
-0.02777	1.09283e-07	-0.02777	9.75952e-08	-0.02777	9.67102e-08	-0.02777	9.76563e-08	-0.02777	1.89362e-07
-0.02533	1.10291e-07	-0.02533	9.90295e-08	-0.02533	9.8053e-08	-0.02533	9.9823e-08	-0.02533	1.922e-07
-0.02289	1.11572e-07	-0.02289	1.0025e-07	-0.02289	1.00037e-07	-0.02289	1.01624e-07	-0.02289	1.96045e-07
-0.02045	1.12976e-07	-0.02045	1.01929e-07	-0.02045	1.01898e-07	-0.02045	1.03973e-07	-0.02045	1.99707e-07
-0.01801	1.14197e-07	-0.01801	1.03333e-07	-0.01801	1.0437e-07	-0.01801	1.06415e-07	-0.01801	2.03003e-07
-0.01556	1.15295e-07	-0.01556	1.04736e-07	-0.01556	1.05682e-07	-0.01556	1.08795e-07	-0.01556	2.07001e-07
-0.01312	1.1676e-07	-0.01312	1.06079e-07	-0.01312	1.07635e-07	-0.01312	1.11267e-07	-0.01312	2.10083e-07
-0.01068	1.17676e-07	-0.01068	1.07819e-07	-0.01068	1.09894e-07	-0.01068	1.13129e-07	-0.01068	2.14386e-07
-0.00824	1.19446e-07	-0.00824	1.09528e-07	-0.00824	1.11725e-07	-0.00824	1.15753e-07	-0.00824	2.18536e-07
-0.0058	1.20544e-07	-0.0058	1.10504e-07	-0.0058	1.13068e-07	-0.0058	1.17767e-07	-0.0058	2.21954e-07
-0.00336	1.22162e-07	-0.00336	1.1261e-07	-0.00336	1.15448e-07	-0.00336	1.20361e-07	-0.00336	2.26898e-07
-0.000915527	1.23169e-07	-0.000915527	1.14288e-07	-0.000915527	1.16913e-07	-0.000915527	1.23291e-07	-0.000915527	2.29889e-07
0.00153	1.24359e-07	0.00153	1.15753e-07	0.00153	1.19049e-07	0.00153	1.25458e-07	0.00153	2.34833e-07
0.00397	1.25702e-07	0.00397	1.16974e-07	0.00397	1.20667e-07	0.00397	1.27777e-07	0.00397	2.38831e-07
0.00641	1.26984e-07	0.00641	1.18744e-07	0.00641	1.23108e-07	0.00641	1.30066e-07	0.00641	2.43011e-07
0.00885	1.28174e-07	0.00885	1.20117e-07	0.00885	1.24878e-07	0.00885	1.32904e-07	0.00885	2.47345e-07
0.01129	1.29822e-07	0.01129	1.21979e-07	0.01129	1.27197e-07	0.01129	1.35254e-07	0.01129	2.51587e-07
0.01373	1.31073e-07	0.01373	1.2384e-07	0.01373	1.28784e-07	0.01373	1.38092e-07	0.01373	2.56317e-07
0.01617	1.32111e-07	0.01617	1.25427e-07	0.01617	1.30859e-07	0.01617	1.40656e-07	0.01617	2.60559e-07
0.01862	1.33423e-07	0.01862	1.26984e-07	0.01862	1.3324e-07	0.01862	1.43219e-07	0.01862	2.64435e-07
0.02106	1.35132e-07	0.02106	1.28662e-07	0.02106	1.34827e-07	0.02106	1.45721e-07	0.02106	2.69043e-07
0.0235	1.36292e-07	0.0235	1.30341e-07	0.0235	1.36993e-07	0.0235	1.48132e-07	0.0235	2.73254e-07
0.02594	1.37543e-07	0.02594	1.32172e-07	0.02594	1.39252e-07	0.02594	1.5097e-07	0.02594	2.77069e-07
0.02838	1.39008e-07	0.02838	1.3327e-07	0.02838	1.41174e-07	0.02838	1.53687e-07	0.02838	2.82074e-07
0.03082	1.40625e-07	0.03082	1.35559e-07	0.03082	1.43616e-07	0.03082	1.56738e-07	0.03082	2.87109e-07
0.03326	1.42151e-07	0.03326	1.36688e-07	0.03326	1.46057e-07	0.03326	1.58966e-07	0.03326	2.91656e-07
0.03571	1.44073e-07	0.03571	1.38519e-07	0.03571	1.4859e-07	0.03571	1.62598e-07	0.03571	2.95898e-07
0.03815	1.44928e-07	0.03815	1.40381e-07	0.03815	1.50238e-07	0.03815	1.64825e-07	0.03815	3.00354e-07
0.04059	1.46729e-07	0.04059	1.42059e-07	0.04059	1.52313e-07	0.04059	1.67969e-07	0.04059	3.04688e-07
0.04303	1.48285e-07	0.04303	1.44257e-07	0.04303	1.54968e-07	0.04303	1.71204e-07	0.04303	3.09448e-07
0.04547	1.49536e-07	0.04547	1.46057e-07	0.04547	1.56891e-07	0.04547	1.74164e-07	0.04547	3.14514e-07
0.04791	1.5097e-07	0.04791	1.48285e-07	0.04791	1.59607e-07	0.04791	1.7691e-07	0.04791	3.19183e-07
0.05035	1.52924e-07	0.05035	1.50024e-07	0.05035	1.62354e-07	0.05035	1.80206e-07	0.05035	3.24829e-07
0.0528	1.53992e-07	0.0528	1.51917e-07	0.0528	1.64398e-07	0.0528	1.83014e-07	0.0528	3.29163e-07
0.05524	1.55609e-07	0.05524	1.54236e-07	0.05524	1.67206e-07	0.05524	1.86249e-07	0.05524	3.34137e-07
0.05768	1.57349e-07	0.05768	1.55853e-07	0.05768	1.69586e-07	0.05768	1.89331e-07	0.05768	3.38776e-07
0.06012	1.59637e-07	0.06012	1.57928e-07	0.06012	1.7218e-07	0.06012	1.92688e-07	0.06012	3.44391e-07
0.06256	1.60309e-07	0.06256	1.60034e-07	0.06256	1.7392e-07	0.06256	1.95892e-07	0.06256	3.48206e-07
0.065	1.62323e-07	0.065	1.61621e-07	0.065	1.76941e-07	0.065	1.99341e-07	0.065	3.54156e-07
0.06744	1.64032e-07	0.06744	1.6394e-07	0.06744	1.79535e-07	0.06744	2.02209e-07	0.06744	3.58398e-07
0.06989	1.66199e-07	0.06989	1.66199e-07	0.06989	1.82404e-07	0.06989	2.05811e-07	0.06989	3.64563e-07
0.07233	1.6748e-07	0.07233	1.68457e-07	0.07233	1.84753e-07	0.07233	2.09045e-07	0.07233	3.69507e-07
0.07477	1.69403e-07	0.07477	1.71112e-07	0.07477	1.87469e-07	0.07477	2.12952e-07	0.07477	3.75244e-07
0.07721	1.71387e-07	0.07721	1.72913e-07	0.07721	1.90613e-07	0.07721	2.164e-07	0.07721	3.80585e-07
0.07965	1.73309e-07	0.07965	1.75293e-07	0.07965	1.9339e-07	0.07965	2.19971e-07	0.07965	3.8678e-07
0.08209	1.75049e-07	0.08209	1.77704e-07	0.08209	1.96381e-07	0.08209	2.23694e-07	0.08209	3.92029e-07
0.08453	1.76819e-07	0.08453	1.79626e-07	0.08453	1.99524e-07	0.08453	2.27142e-07	0.08453	3.97034e-07
0.08698	1.78894e-07	0.08698	1.82312e-07	0.08698	2.02484e-07	0.08698	2.3111e-07	0.08698	4.02802e-07
0.08942	1.80573e-07	0.08942	1.84937e-07	0.08942	2.05627e-07	0.08942	2.34863e-07	0.08942	4.0918e-07
0.09186	1.82251e-07	0.09186	1.86981e-07	0.09186	2.09045e-07	0.09186	2.38434e-07	0.09186	4.14825e-07
0.0943	1.84296e-07	0.0943	1.90094e-07	0.0943	2.11731e-07	0.0943	2.42645e-07	0.0943	4.20959e-07
0.09674	1.86371e-07	0.09674	1.9281e-07	0.09674	2.146e-07	0.09674	2.46002e-07	0.09674	4.26758e-07
0.09918	1.88568e-07	0.09918	1.94946e-07	0.09918	2.17712e-07	0.09918	2.50153e-07	0.09918	4.33197e-07
0.10162	1.90765e-07	0.10162	1.97906e-07	0.10162	2.21313e-07	0.10162	2.54517e-07	0.10162	4.39453e-07
0.10406	1.93024e-07	0.10406	2.00806e-07	0.10406	2.24426e-07	0.10406	2.59125e-07	0.10406	4.45587e-07
0.10651	1.94977e-07	0.10651	2.03461e-07	0.10651	2.28271e-07	0.10651	2.63397e-07	0.10651	4.52148e-07
0.10895	1.97723e-07	0.10895	2.06207e-07	0.10895	2.31842e-07	0.10895	2.68036e-07	0.10895	4.59106e-07
0.11139	1.99402e-07	0.11139	2.09106e-07	0.11139	2.34955e-07	0.11139	2.72339e-07	0.11139	4.65027e-07
0.11383	2.01813e-07	0.11383	2.12097e-07	0.11383	2.38678e-07	0.11383	2.76947e-07	0.11383	4.71863e-07
0.11627	2.04193e-07	0.11627	2.15118e-07	0.11627	2.42371e-07	0.11627	2.81281e-07	0.11627	4.78577e-07
0.11871	2.06451e-07	0.11871	2.17957e-07	0.11871	2.45819e-07	0.11871	2.8653e-07	0.11871	4.85229e-07
0.12115	2.08405e-07	0.12115	2.20947e-07	0.12115	2.5e-07	0.12115	2.91046e-07	0.12115	4.91028e-07
0.1236	2.10846e-07	0.1236	2.23846e-07	0.1236	2.53418e-07	0.1236	2.95898e-07	0.1236	4.98413e-07
0.12604	2.12952e-07	0.12604	2.26166e-07	0.12604	2.57599e-07	0.12604	3.00537e-07	0.12604	5.05585e-07
0.12848	2.15912e-07	0.12848	2.29614e-07	0.12848	2.61475e-07	0.12848	3.05969e-07	0.12848	5.13062e-07
0.13092	2.18201e-07	0.13092	2.32269e-07	0.13092	2.64984e-07	0.13092	3.10547e-07	0.13092	5.2066e-07
0.13336	2.20947e-07	0.13336	2.35687e-07	0.13336	2.69226e-07	0.13336	3.16254e-07	0.13336	5.2774e-07
0.1358	2.23175e-07	0.1358	2.38831e-07	0.1358	2.73315e-07	0.1358	3.21716e-07	0.1358	5.35004e-07
0.13824	2.26196e-07	0.13824	2.42432e-07	0.13824	2.77802e-07	0.13824	3.26813e-07	0.13824	5.42725e-07
0.14069	2.28638e-07	0.14069	2.45636e-07	0.14069	2.81677e-07	0.14069	3.3252e-07	0.14069	5.51117e-07
0.14313	2.31659e-07	0.14313	2.49146e-07	0.14313	2.86224e-07	0.14313	3.37982e-07	0.14313	5.58319e-07
0.14557	2.34161e-07	0.14557	2.52716e-07	0.14557	2.90405e-07	0.14557	3.43475e-07	0.14557	5.66437e-07
0.14801	2.3703e-07	0.14801	2.56531e-07	0.14801	2.95807e-07	0.14801	3.49762e-07	0.14801	5.74402e-07
0.15045	2.39716e-07	0.15045	2.6004e-07	0.15045	2.99927e-07	0.15045	3.55377e-07	0.15045	5.82336e-07
0.15289	2.42371e-07	0.15289	2.6413e-07	0.15289	3.04901e-07	0.15289	3.61725e-07	0.15289	5.91217e-07
0.15533	2.45239e-07	0.15533	2.6767e-07	0.15533	3.09082e-07	0.15533	3.67676e-07	0.15533	5.99182e-07
0.15778	2.48291e-07	0.15778	2.71484e-07	0.15778	3.14117e-07	0.15778	3.73535e-07	0.15778	6.073e-07
0.16022	2.51068e-07	0.16022	2.75665e-07	0.16022	3.19366e-07	0.16022	3.80127e-07	0.16022	6.1554e-07
0.16266	2.54425e-07	0.16266	2.7951e-07	0.16266	3.23883e-07	0.16266	3.86414e-07	0.16266	6.23779e-07
0.1651	2.57263e-07	0.1651	2.84058e-07	0.1651	3.28796e-07	0.1651	3.92853e-07	0.1651	6.32935e-07
0.16754	2.60651e-07	0.16754	2.88239e-07	0.16754	3.34259e-07	0.16754	3.99719e-07	0.16754	6.41479e-07
0.16998	2.63489e-07	0.16998	2.92145e-07	0.16998	3.3905e-07	0.16998	4.06372e-07	0.16998	6.50635e-07
0.17242	2.67242e-07	0.17242	2.96875e-07	0.17242	3.44696e-07	0.17242	4.13361e-07	0.17242	6.59485e-07
0.17487	2.70569e-07	0.17487	3.01239e-07	0.17487	3.50159e-07	0.17487	4.20349e-07	0.17487	6.68335e-07
0.17731	2.73956e-07	0.17731	3.05603e-07	0.17731	3.55774e-07	0.17731	4.27979e-07	0.17731	6.78711e-07
0.17975	2.77313e-07	0.17975	3.10303e-07	0.17975	3.61298e-07	0.17975	4.34509e-07	0.17975	6.87866e-07
0.18219	2.80609e-07	0.18219	3.15338e-07	0.18219	3.66821e-07	0.18219	4.42261e-07	0.18219	6.97021e-07
0.18463	2.84332e-07	0.18463	3.19702e-07	0.18463	3.7323e-07	0.18463	4.49799e-07	0.18463	7.08618e-07
0.18707	2.87598e-07	0.18707	3.25104e-07	0.18707	3.79517e-07	0.18707	4.58008e-07	0.18707	7.18384e-07
0.18951	2.91565e-07	0.18951	3.29865e-07	0.18951	3.85315e-07	0.18951	4.65454e-07	0.18951	7.27234e-07
0.19196	2.95288e-07	0.19196	3.34625e-07	0.19196	3.9151e-07	0.19196	4.73114e-07	0.19196	7.39136e-07
0.1944	2.99072e-07	0.1944	3.39996e-07	0.1944	3.97919e-07	0.1944	4.80896e-07	0.1944	7.49207e-07
0.19684	3.02948e-07	0.19684	3.45367e-07	0.19684	4.04663e-07	0.19684	4.89471e-07	0.19684	7.58667e-07
0.19928	3.07159e-07	0.19928	3.50464e-07	0.19928	4.10858e-07	0.19928	4.97681e-07	0.19928	7.70569e-07
0.20172	3.10852e-07	0.20172	3.55713e-07	0.20172	4.17511e-07	0.20172	5.06012e-07	0.20172	7.81555e-07
0.20416	3.1488e-07	0.20416	3.61115e-07	0.20416	4.24347e-07	0.20416	5.14893e-07	0.20416	7.91321e-07
0.2066	3.19489e-07	0.2066	3.66882e-07	0.2066	4.3161e-07	0.2066	5.23743e-07	0.2066	8.03223e-07
0.20905	3.23517e-07	0.20905	3.72772e-07	0.20905	4.37622e-07	0.20905	5.32227e-07	0.20905	8.14514e-07
0.21149	3.27667e-07	0.21149	3.78265e-07	0.21149	4.45007e-07	0.21149	5.41779e-07	0.21149	8.26111e-07
0.21393	3.32214e-07	0.21393	3.83606e-07	0.21393	4.51904e-07	0.21393	5.50568e-07	0.21393	8.38013e-07
0.21637	3.36792e-07	0.21637	3.90137e-07	0.21637	4.59717e-07	0.21637	5.60028e-07	0.21637	8.48389e-07
0.21881	3.41278e-07	0.21881	3.95508e-07	0.21881	4.67133e-07	0.21881	5.69244e-07	0.21881	8.60596e-07
0.22125	3.45764e-07	0.22125	4.01672e-07	0.22125	4.74884e-07	0.22125	5.78979e-07	0.22125	8.73413e-07
0.22369	3.50311e-07	0.22369	4.08051e-07	0.22369	4.82605e-07	0.22369	5.88257e-07	0.22369	8.84705e-07
0.22614	3.55164e-07	0.22614	4.1452e-07	0.22614	4.90906e-07	0.22614	5.98419e-07	0.22614	8.97827e-07
0.22858	3.59497e-07	0.22858	4.20502e-07	0.22858	4.98322e-07	0.22858	6.07758e-07	0.22858	9.10034e-07
0.23102	3.64532e-07	0.23102	4.26971e-07	0.23102	5.06897e-07	0.23102	6.17371e-07	0.23102	9.23767e-07
0.23346	3.69537e-07	0.23346	4.33655e-07	0.23346	5.14771e-07	0.23346	6.26221e-07	0.23346	9.35059e-07
0.2359	3.74725e-07	0.2359	4.40186e-07	0.2359	5.22522e-07	0.2359	6.36902e-07	0.2359	9.48181e-07
0.23834	3.79761e-07	0.23834	4.46564e-07	0.23834	5.3125e-07	0.23834	6.47583e-07	0.23834	9.60083e-07
0.24078	3.84857e-07	0.24078	4.534e-07	0.24078	5.3952e-07	0.24078	6.58264e-07	0.24078	9.73816e-07
0.24323	3.90411e-07	0.24323	4.60083e-07	0.24323	5.47852e-07	0.24323	6.6864e-07	0.24323	9.86633e-07
0.24567	3.95721e-07	0.24567	4.67926e-07	0.24567	5.56885e-07	0.24567	6.79932e-07	0.24567	1.00098e-06
0.24811	4.00787e-07	0.24811	4.74762e-07	0.24811	5.65796e-07	0.24811	6.89392e-07	0.24811	1.0144e-06
0.25055	4.06586e-07	0.25055	4.82483e-07	0.25055	5.75439e-07	0.25055	7.01904e-07	0.25055	1.02753e-06
0.25299	4.11835e-07	0.25299	4.89532e-07	0.25299	5.83801e-07	0.25299	7.12891e-07	0.25299	1.04279e-06
0.25543	4.17633e-07	0.25543	4.98016e-07	0.25543	5.93414e-07	0.25543	7.24182e-07	0.25543	1.05652e-06
0.25787	4.23218e-07	0.25787	5.05066e-07	0.25787	6.02905e-07	0.25787	7.35168e-07	0.25787	1.07086e-06
0.26031	4.29077e-07	0.26031	5.12756e-07	0.26031	6.10962e-07	0.26031	7.47375e-07	0.26031	1.08429e-06
0.26276	4.35028e-07	0.26276	5.20569e-07	0.26276	6.20117e-07	0.26276	7.58362e-07	0.26276	1.09924e-06
0.2652	4.40918e-07	0.2652	5.28748e-07	0.2652	6.30493e-07	0.2652	7.70569e-07	0.2652	1.11511e-06
0.26764	4.46716e-07	0.26764	5.36652e-07	0.26764	6.40869e-07	0.26764	7.82166e-07	0.26764	1.12793e-06
0.27008	4.53064e-07	0.27008	5.45013e-07	0.27008	6.50635e-07	0.27008	7.94983e-07	0.27008	1.14258e-06
0.27252	4.58984e-07	0.27252	5.52826e-07	0.27252	6.604e-07	0.27252	8.05969e-07	0.27252	1.15692e-06
0.27496	4.65881e-07	0.27496	5.61127e-07	0.27496	6.70166e-07	0.27496	8.18481e-07	0.27496	1.17279e-06
0.2774	4.71771e-07	0.2774	5.69e-07	0.2774	6.80237e-07	0.2774	8.31604e-07	0.2774	1.18835e-06
0.27985	4.78607e-07	0.27985	5.77606e-07	0.27985	6.90918e-07	0.27985	8.43811e-07	0.27985	1.20453e-06
0.28229	4.84711e-07	0.28229	5.85907e-07	0.28229	7.01599e-07	0.28229	8.56323e-07	0.28229	1.21918e-06
0.28473	4.92096e-07	0.28473	5.94788e-07	0.28473	7.13196e-07	0.28473	8.69751e-07	0.28473	1.23535e-06
0.28717	4.97803e-07	0.28717	6.03333e-07	0.28717	7.22961e-07	0.28717	8.81958e-07	0.28717	1.25092e-06
0.28961	5.05096e-07	0.28961	6.10962e-07	0.28961	7.33948e-07	0.28961	8.94165e-07	0.28961	1.26678e-06
0.29205	5.11322e-07	0.29205	6.19202e-07	0.29205	7.44629e-07	0.29205	9.07898e-07	0.29205	1.28174e-06
0.29449	5.1886e-07	0.29449	6.29272e-07	0.29449	7.5592e-07	0.29449	9.21631e-07	0.29449	1.2973e-06
0.29694	5.24994e-07	0.29694	6.36902e-07	0.29694	7.67822e-07	0.29694	9.34143e-07	0.29694	1.31317e-06
0.29938	5.32227e-07	0.29938	6.46057e-07	0.29938	7.77893e-07	0.29938	9.47876e-07	0.29938	1.32904e-06
0.30182	5.39124e-07	0.30182	6.54907e-07	0.30182	7.90405e-07	0.30182	9.60999e-07	0.30182	1.3446e-06
0.30426	5.466e-07	0.30426	6.64368e-07	0.30426	8.02002e-07	0.30426	9.74731e-07	0.30426	1.36261e-06
0.3067	5.53589e-07	0.3067	6.72607e-07	0.3067	8.12683e-07	0.3067	9.87549e-07	0.3067	1.37817e-06
0.30914	5.61188e-07	0.30914	6.82373e-07	0.30914	8.25195e-07	0.30914	1.00189e-06	0.30914	1.39526e-06
0.31158	5.68024e-07	0.31158	6.90918e-07	0.31158	8.35876e-07	0.31158	1.01501e-06	0.31158	1.41144e-06
0.31403	5.7547e-07	0.31403	7.00684e-07	0.31403	8.47473e-07	0.31403	1.02905e-06	0.31403	1.42944e-06
0.31647	5.82886e-07	0.31647	7.10144e-07	0.31647	8.60291e-07	0.31647	1.04248e-06	0.31647	1.44684e-06
0.31891	5.90729e-07	0.31891	7.18689e-07	0.31891	8.71277e-07	0.31891	1.05713e-06	0.31891	1.46454e-06
0.32135	5.98022e-07	0.32135	7.2876e-07	0.32135	8.82568e-07	0.32135	1.07147e-06	0.32135	1.48193e-06
0.32379	6.0553e-07	0.32379	7.38831e-07	0.32379	8.95691e-07	0.32379	1.08551e-06	0.32379	1.49933e-06
0.32623	6.12183e-07	0.32623	7.48596e-07	0.32623	9.07593e-07	0.32623	1.09894e-06	0.32623	1.51581e-06
0.32867	6.19507e-07	0.32867	7.58362e-07	0.32867	9.21021e-07	0.32867	1.1142e-06	0.32867	1.53381e-06
0.33112	6.26526e-07	0.33112	7.68433e-07	0.33112	9.32922e-07	0.33112	1.12854e-06	0.33112	1.55151e-06
0.33356	6.35071e-07	0.33356	7.79114e-07	0.33356	9.45435e-07	0.33356	1.14319e-06	0.33356	1.5686e-06
0.336	6.4209e-07	0.336	7.88574e-07	0.336	9.57336e-07	0.336	1.15692e-06	0.336	1.586e-06
0.33844	6.5033e-07	0.33844	7.9834e-07	0.33844	9.69849e-07	0.33844	1.17126e-06	0.33844	1.60461e-06
0.34088	6.57654e-07	0.34088	8.08411e-07	0.34088	9.82361e-07	0.34088	1.1853e-06	0.34088	1.6214e-06
0.34332	6.66809e-07	0.34332	8.18176e-07	0.34332	9.94873e-07	0.34332	1.20026e-06	0.34332	1.6394e-06
0.34576	6.74133e-07	0.34576	8.28552e-07	0.34576	1.00739e-06	0.34576	1.2149e-06	0.34576	1.65649e-06
0.34821	6.83594e-07	0.34821	8.39539e-07	0.34821	1.0202e-06	0.34821	1.23016e-06	0.34821	1.67572e-06
0.35065	6.90918e-07	0.35065	8.49304e-07	0.35065	1.03302e-06	0.35065	1.24542e-06	0.35065	1.69373e-06
0.35309	6.99768e-07	0.35309	8.59985e-07	0.35309	1.04553e-06	0.35309	1.26007e-06	0.35309	1.71234e-06
0.35553	7.07397e-07	0.35553	8.70056e-07	0.35553	1.05865e-06	0.35553	1.27502e-06	0.35553	1.73187e-06
0.35797	7.15942e-07	0.35797	8.80432e-07	0.35797	1.07208e-06	0.35797	1.28937e-06	0.35797	1.74988e-06
0.36041	7.23877e-07	0.36041	8.90503e-07	0.36041	1.08459e-06	0.36041	1.30402e-06	0.36041	1.76849e-06
0.36285	7.32422e-07	0.36285	9.00574e-07	0.36285	1.09772e-06	0.36285	1.3205e-06	0.36285	1.78741e-06
0.3653	7.40662e-07	0.3653	9.10645e-07	0.3653	1.11084e-06	0.3653	1.33514e-06	0.3653	1.80481e-06
0.36774	7.48901e-07	0.36774	9.21021e-07	0.36774	1.12488e-06	0.36774	1.35071e-06	0.36774	1.82343e-06
0.37018	7.57446e-07	0.37018	9.31396e-07	0.37018	1.13739e-06	0.37018	1.36597e-06	0.37018	1.84357e-06
0.37262	7.65991e-07	0.37262	9.42688e-07	0.37262	1.15143e-06	0.37262	1.38153e-06	0.37262	1.8631e-06
0.37506	7.74231e-07	0.37506	9.52759e-07	0.37506	1.16394e-06	0.37506	1.39709e-06	0.37506	1.88141e-06
0.3775	7.83081e-07	0.3775	9.6405e-07	0.3775	1.17737e-06	0.3775	1.41205e-06	0.3775	1.90063e-06
0.37994	7.91016e-07	0.37994	9.74121e-07	0.37994	1.1908e-06	0.37994	1.42883e-06	0.37994	1.91956e-06
0.38239	8.00171e-07	0.38239	9.86328e-07	0.38239	1.20422e-06	0.38239	1.4444e-06	0.38239	1.94061e-06
0.38483	8.09937e-07	0.38483	9.96094e-07	0.38483	1.21643e-06	0.38483	1.46027e-06	0.38483	1.96014e-06
0.38727	8.18176e-07	0.38727	1.00708e-06	0.38727	1.23199e-06	0.38727	1.47614e-06	0.38727	1.97998e-06
0.38971	8.27332e-07	0.38971	1.01685e-06	0.38971	1.24542e-06	0.38971	1.492e-06	0.38971	1.9989e-06
0.39215	8.35571e-07	0.39215	1.02844e-06	0.39215	1.25885e-06	0.39215	1.50757e-06	0.39215	2.01904e-06
0.39459	8.45337e-07	0.39459	1.03882e-06	0.39459	1.27228e-06	0.39459	1.52435e-06	0.39459	2.03857e-06
0.39703	8.53271e-07	0.39703	1.05042e-06	0.39703	1.28632e-06	0.39703	1.54083e-06	0.39703	2.05902e-06
0.39948	8.63037e-07	0.39948	1.06171e-06	0.39948	1.30066e-06	0.39948	1.5564e-06	0.39948	2.07825e-06
0.40192	8.71582e-07	0.40192	1.07239e-06	0.40192	1.315e-06	0.40192	1.57379e-06	0.40192	2.10022e-06
0.40436	8.80127e-07	0.40436	1.08307e-06	0.40436	1.32874e-06	0.40436	1.59027e-06	0.40436	2.11884e-06
0.4068	8.90808e-07	0.4068	1.09589e-06	0.4068	1.34247e-06	0.4068	1.60645e-06	0.4068	2.14081e-06
0.40924	8.99048e-07	0.40924	1.10596e-06	0.40924	1.3562e-06	0.40924	1.62323e-06	0.40924	2.16064e-06
0.41168	9.09119e-07	0.41168	1.11847e-06	0.41168	1.37177e-06	0.41168	1.6391e-06	0.41168	2.18079e-06
0.41412	9.17664e-07	0.41412	1.12885e-06	0.41412	1.3858e-06	0.41412	1.6571e-06	0.41412	2.20123e-06
0.41656	9.27429e-07	0.41656	1.14014e-06	0.41656	1.40015e-06	0.41656	1.67358e-06	0.41656	2.2229e-06
0.41901	9.375e-07	0.41901	1.15204e-06	0.41901	1.41449e-06	0.41901	1.69128e-06	0.41901	2.24396e-06
0.42145	9.4635e-07	0.42145	1.16455e-06	0.42145	1.42944e-06	0.42145	1.70776e-06	0.42145	2.26563e-06
0.42389	9.56726e-07	0.42389	1.17584e-06	0.42389	1.4444e-06	0.42389	1.72546e-06	0.42389	2.28668e-06
0.42633	9.66187e-07	0.42633	1.18835e-06	0.42633	1.45935e-06	0.42633	1.74438e-06	0.42633	2.30896e-06
0.42877	9.75952e-07	0.42877	1.20056e-06	0.42877	1.474e-06	0.42877	1.76086e-06	0.42877	2.32788e-06
0.43121	9.86023e-07	0.43121	1.21216e-06	0.43121	1.48956e-06	0.43121	1.77917e-06	0.43121	2.35077e-06
0.43365	9.95178e-07	0.43365	1.22345e-06	0.43365	1.50482e-06	0.43365	1.79779e-06	0.43365	2.37274e-06
0.4361	1.00494e-06	0.4361	1.23627e-06	0.4361	1.51947e-06	0.4361	1.81488e-06	0.4361	2.39532e-06
0.43854	1.01563e-06	0.43854	1.24908e-06	0.43854	1.53595e-06	0.43854	1.83411e-06	0.43854	2.4176e-06
0.44098	1.026e-06	0.44098	1.2619e-06	0.44098	1.55151e-06	0.44098	1.85303e-06	0.44098	2.43958e-06
0.44342	1.03516e-06	0.44342	1.27441e-06	0.44342	1.56586e-06	0.44342	1.87042e-06	0.44342	2.46246e-06
0.44586	1.04706e-06	0.44586	1.28693e-06	0.44586	1.58264e-06	0.44586	1.88995e-06	0.44586	2.48535e-06
0.4483	1.05713e-06	0.4483	1.29883e-06	0.4483	1.59698e-06	0.4483	1.90857e-06	0.4483	2.50793e-06
0.45074	1.0675e-06	0.45074	1.31317e-06	0.45074	1.61316e-06	0.45074	1.92871e-06	0.45074	2.53143e-06
0.45319	1.07788e-06	0.45319	1.32507e-06	0.45319	1.62933e-06	0.45319	1.94702e-06	0.45319	2.55463e-06
0.45563	1.08887e-06	0.45563	1.33728e-06	0.45563	1.6449e-06	0.45563	1.96625e-06	0.45563	2.57782e-06
0.45807	1.09924e-06	0.45807	1.35193e-06	0.45807	1.66168e-06	0.45807	1.98639e-06	0.45807	2.60193e-06
0.46051	1.11023e-06	0.46051	1.36383e-06	0.46051	1.67786e-06	0.46051	2.00562e-06	0.46051	2.62604e-06
0.46295	1.12122e-06	0.46295	1.37787e-06	0.46295	1.69403e-06	0.46295	2.02454e-06	0.46295	2.64984e-06
0.46539	1.13251e-06	0.46539	1.3916e-06	0.46539	1.71021e-06	0.46539	2.04498e-06	0.46539	2.67365e-06
0.46783	1.14258e-06	0.46783	1.40472e-06	0.46783	1.72638e-06	0.46783	2.06512e-06	0.46783	2.69684e-06
0.47028	1.15417e-06	0.47028	1.41846e-06	0.47028	1.74377e-06	0.47028	2.08466e-06	0.47028	2.72278e-06
0.47272	1.16577e-06	0.47272	1.43158e-06	0.47272	1.76147e-06	0.47272	2.10541e-06	0.47272	2.7475e-06
0.47516	1.17584e-06	0.47516	1.4447e-06	0.47516	1.77734e-06	0.47516	2.12585e-06	0.47516	2.77222e-06
0.4776	1.18866e-06	0.4776	1.45966e-06	0.4776	1.79443e-06	0.4776	2.1463e-06	0.4776	2.79816e-06
0.48004	1.19873e-06	0.48004	1.47339e-06	0.48004	1.81274e-06	0.48004	2.16797e-06	0.48004	2.82349e-06
0.48248	1.21094e-06	0.48248	1.48834e-06	0.48248	1.82861e-06	0.48248	2.18872e-06	0.48248	2.84912e-06
0.48492	1.22284e-06	0.48492	1.50177e-06	0.48492	1.84662e-06	0.48492	2.20978e-06	0.48492	2.87567e-06
0.48737	1.23413e-06	0.48737	1.51581e-06	0.48737	1.86462e-06	0.48737	2.23053e-06	0.48737	2.90009e-06
0.48981	1.24695e-06	0.48981	1.53015e-06	0.48981	1.88385e-06	0.48981	2.25342e-06	0.48981	2.92786e-06
0.49225	1.25824e-06	0.49225	1.5451e-06	0.49225	1.90063e-06	0.49225	2.27448e-06	0.49225	2.9541e-06
0.49469	1.27136e-06	0.49469	1.55975e-06	0.49469	1.91925e-06	0.49469	2.29675e-06	0.49469	2.98004e-06
0.49713	1.28296e-06	0.49713	1.5744e-06	0.49713	1.93756e-06	0.49713	2.31873e-06	0.49713	3.00659e-06
0.49957	1.29486e-06	0.49957	1.58997e-06	0.49957	1.95709e-06	0.49957	2.3407e-06	0.49957	3.03528e-06
0.50201	1.30768e-06	0.50201	1.60431e-06	0.50201	1.97479e-06	0.50201	2.36389e-06	0.50201	3.0603e-06
0.50446	1.31989e-06	0.50446	1.61957e-06	0.50446	1.99463e-06	0.50446	2.38678e-06	0.50446	3.08868e-06
0.5069	1.33301e-06	0.5069	1.63574e-06	0.5069	2.01202e-06	0.5069	2.40875e-06	0.5069	3.11676e-06
0.50934	1.34583e-06	0.50934	1.65161e-06	0.50934	2.03156e-06	0.50934	2.43256e-06	0.50934	3.14392e-06
0.51178	1.35864e-06	0.51178	1.66718e-06	0.51178	2.05078e-06	0.51178	2.45575e-06	0.51178	3.17291e-06
0.51422	1.37146e-06	0.51422	1.68304e-06	0.51422	2.07031e-06	0.51422	2.47864e-06	0.51422	3.20129e-06
0.51666	1.38367e-06	0.51666	1.69891e-06	0.51666	2.09015e-06	0.51666	2.50275e-06	0.51666	3.2309e-06
0.5191	1.39832e-06	0.5191	1.71539e-06	0.5191	2.11029e-06	0.5191	2.52716e-06	0.5191	3.2605e-06
0.52155	1.41083e-06	0.52155	1.73157e-06	0.52155	2.12982e-06	0.52155	2.55005e-06	0.52155	3.28979e-06
0.52399	1.42487e-06	0.52399	1.74774e-06	0.52399	2.14966e-06	0.52399	2.57538e-06	0.52399	3.32031e-06
0.52643	1.4386e-06	0.52643	1.76392e-06	0.52643	2.1701e-06	0.52643	2.59918e-06	0.52643	3.349e-06
0.52887	1.45233e-06	0.52887	1.78162e-06	0.52887	2.19055e-06	0.52887	2.62482e-06	0.52887	3.38013e-06
0.53131	1.46484e-06	0.53131	1.79718e-06	0.53131	2.211e-06	0.53131	2.64832e-06	0.53131	3.40973e-06
0.53375	1.47797e-06	0.53375	1.81458e-06	0.53375	2.23145e-06	0.53375	2.67365e-06	0.53375	3.44116e-06
0.53619	1.4917e-06	0.53619	1.83228e-06	0.53619	2.25372e-06	0.53619	2.69897e-06	0.53619	3.47107e-06
0.53864	1.50696e-06	0.53864	1.84967e-06	0.53864	2.27417e-06	0.53864	2.72491e-06	0.53864	3.50342e-06
0.54108	1.52039e-06	0.54108	1.86646e-06	0.54108	2.29462e-06	0.54108	2.74994e-06	0.54108	3.53455e-06
0.54352	1.53564e-06	0.54352	1.88416e-06	0.54352	2.3172e-06	0.54352	2.77527e-06	0.54352	3.56628e-06
0.54596	1.54907e-06	0.54596	1.90155e-06	0.54596	2.33734e-06	0.54596	2.80182e-06	0.54596	3.59772e-06
0.5484	1.56372e-06	0.5484	1.91895e-06	0.5484	2.35992e-06	0.5484	2.82715e-06	0.5484	3.63007e-06
0.55084	1.57745e-06	0.55084	1.93695e-06	0.55084	2.38129e-06	0.55084	2.85461e-06	0.55084	3.66211e-06
0.55328	1.59241e-06	0.55328	1.95465e-06	0.55328	2.40295e-06	0.55328	2.87994e-06	0.55328	3.69415e-06
0.55573	1.60675e-06	0.55573	1.97327e-06	0.55573	2.42493e-06	0.55573	2.90741e-06	0.55573	3.72711e-06
0.55817	1.6214e-06	0.55817	1.99188e-06	0.55817	2.44812e-06	0.55817	2.93518e-06	0.55817	3.76038e-06
0.56061	1.63635e-06	0.56061	2.00989e-06	0.56061	2.46979e-06	0.56061	2.96173e-06	0.56061	3.79425e-06
0.56305	1.65161e-06	0.56305	2.02881e-06	0.56305	2.4939e-06	0.56305	2.98981e-06	0.56305	3.82843e-06
0.56549	1.66687e-06	0.56549	2.04773e-06	0.56549	2.51556e-06	0.56549	3.01666e-06	0.56549	3.86139e-06
0.56793	1.68243e-06	0.56793	2.06635e-06	0.56793	2.53906e-06	0.56793	3.04565e-06	0.56793	3.89587e-06
0.57037	1.69708e-06	0.57037	2.08466e-06	0.57037	2.56165e-06	0.57037	3.07251e-06	0.57037	3.92944e-06
0.57281	1.71234e-06	0.57281	2.10419e-06	0.57281	2.58484e-06	0.57281	3.10211e-06	0.57281	3.96332e-06
0.57526	1.7276e-06	0.57526	2.12341e-06	0.57526	2.60834e-06	0.57526	3.12988e-06	0.57526	3.9978e-06
0.5777	1.74316e-06	0.5777	2.14264e-06	0.5777	2.63214e-06	0.5777	3.15948e-06	0.5777	4.03412e-06
0.58014	1.75873e-06	0.58014	2.16187e-06	0.58014	2.65564e-06	0.58014	3.18695e-06	0.58014	4.06891e-06
0.58258	1.77521e-06	0.58258	2.1817e-06	0.58258	2.68066e-06	0.58258	3.21777e-06	0.58258	4.10492e-06
0.58502	1.79108e-06	0.58502	2.20154e-06	0.58502	2.70386e-06	0.58502	3.24585e-06	0.58502	4.14001e-06
0.58746	1.80634e-06	0.58746	2.22168e-06	0.58746	2.72858e-06	0.58746	3.27576e-06	0.58746	4.17633e-06
0.5899	1.82251e-06	0.5899	2.24121e-06	0.5899	2.75208e-06	0.5899	3.30597e-06	0.5899	4.21143e-06
0.59235	1.83868e-06	0.59235	2.26166e-06	0.59235	2.77557e-06	0.59235	3.33557e-06	0.59235	4.24927e-06
0.59479	1.85455e-06	0.59479	2.2818e-06	0.59479	2.80182e-06	0.59479	3.36487e-06	0.59479	4.28406e-06
0.59723	1.87195e-06	0.59723	2.30316e-06	0.59723	2.82654e-06	0.59723	3.396e-06	0.59723	4.32281e-06
0.59967	1.88782e-06	0.59967	2.32269e-06	0.59967	2.85065e-06	0.59967	3.42621e-06	0.59967	4.35883e-06
0.60211	1.90369e-06	0.60211	2.34497e-06	0.60211	2.8772e-06	0.60211	3.45764e-06	0.60211	4.39636e-06
0.60455	1.92078e-06	0.60455	2.36511e-06	0.60455	2.90131e-06	0.60455	3.48755e-06	0.60455	4.4339e-06
0.60699	1.93634e-06	0.60699	2.38586e-06	0.60699	2.92664e-06	0.60699	3.51868e-06	0.60699	4.47296e-06
0.60944	1.95343e-06	0.60944	2.40723e-06	0.60944	2.95258e-06	0.60944	3.55011e-06	0.60944	4.50836e-06
0.61188	1.97113e-06	0.61188	2.42889e-06	0.61188	2.97791e-06	0.61188	3.58154e-06	0.61188	4.54681e-06
0.61432	1.987e-06	0.61432	2.45056e-06	0.61432	3.00262e-06	0.61432	3.61237e-06	0.61432	4.58435e-06
0.61676	2.00439e-06	0.61676	2.47223e-06	0.61676	3.02948e-06	0.61676	3.64563e-06	0.61676	4.62402e-06
0.6192	2.02026e-06	0.6192	2.49359e-06	0.6192	3.05359e-06	0.6192	3.67584e-06	0.6192	4.66156e-06
0.62164	2.03857e-06	0.62164	2.51526e-06	0.62164	3.08075e-06	0.62164	3.70911e-06	0.62164	4.70184e-06
0.62408	2.05414e-06	0.62408	2.53754e-06	0.62408	3.10638e-06	0.62408	3.74115e-06	0.62408	4.73877e-06
0.62653	2.07214e-06	0.62653	2.55798e-06	0.62653	3.13293e-06	0.62653	3.77197e-06	0.62653	4.77844e-06
0.62897	2.08862e-06	0.62897	2.57935e-06	0.62897	3.15857e-06	0.62897	3.80524e-06	0.62897	4.8175e-06
0.63141	2.10602e-06	0.63141	2.60193e-06	0.63141	3.18512e-06	0.63141	3.83698e-06	0.63141	4.85657e-06
0.63385	2.1228e-06	0.63385	2.62268e-06	0.63385	3.21136e-06	0.63385	3.87054e-06	0.63385	4.89624e-06
0.63629	2.1405e-06	0.63629	2.64618e-06	0.63629	3.23975e-06	0.63629	3.90442e-06	0.63629	4.93561e-06
0.63873	2.15668e-06	0.63873	2.66785e-06	0.63873	3.26569e-06	0.63873	3.93677e-06	0.63873	4.97345e-06
0.64117	2.17468e-06	0.64117	2.68982e-06	0.64117	3.29315e-06	0.64117	3.96973e-06	0.64117	5.01495e-06
0.64362	2.19208e-06	0.64362	2.71149e-06	0.64362	3.31879e-06	0.64362	4.00299e-06	0.64362	5.05463e-06
0.64606	2.21039e-06	0.64606	2.73468e-06	0.64606	3.34656e-06	0.64606	4.03656e-06	0.64606	5.0943e-06
0.6485	2.22748e-06	0.6485	2.75604e-06	0.6485	3.37372e-06	0.6485	4.06799e-06	0.6485	5.13336e-06
0.65094	2.24396e-06	0.65094	2.77832e-06	0.65094	3.39935e-06	0.65094	4.10278e-06	0.65094	5.17395e-06
0.65338	2.26227e-06	0.65338	2.80029e-06	0.65338	3.42773e-06	0.65338	4.13635e-06	0.65338	5.21484e-06
0.65582	2.28027e-06	0.65582	2.82349e-06	0.65582	3.4549e-06	0.65582	4.17053e-06	0.65582	5.25543e-06
0.65826	2.29645e-06	0.65826	2.84607e-06	0.65826	3.48175e-06	0.65826	4.20319e-06	0.65826	5.29572e-06
0.66071	2.31506e-06	0.66071	2.86835e-06	0.66071	3.5083e-06	0.66071	4.23798e-06	0.66071	5.33661e-06
0.66315	2.33185e-06	0.66315	2.89124e-06	0.66315	3.53577e-06	0.66315	4.27032e-06	0.66315	5.37598e-06
0.66559	2.34894e-06	0.66559	2.9129e-06	0.66559	3.56201e-06	0.66559	4.30511e-06	0.66559	5.41626e-06
0.66803	2.36603e-06	0.66803	2.9361e-06	0.66803	3.58917e-06	0.66803	4.33777e-06	0.66803	5.45563e-06
0.67047	2.38403e-06	0.67047	2.95898e-06	0.67047	3.61511e-06	0.67047	4.37347e-06	0.67047	5.49713e-06
0.67291	2.40173e-06	0.67291	2.98157e-06	0.67291	3.64258e-06	0.67291	4.40674e-06	0.67291	5.53741e-06
0.67535	2.41882e-06	0.67535	3.00507e-06	0.67535	3.67035e-06	0.67535	4.44092e-06	0.67535	5.57922e-06
0.6778	2.435e-06	0.6778	3.02582e-06	0.6778	3.69598e-06	0.6778	4.47479e-06	0.6778	5.61737e-06
0.68024	2.453e-06	0.68024	3.05054e-06	0.68024	3.72345e-06	0.68024	4.5105e-06	0.68024	5.65948e-06
0.68268	2.46948e-06	0.68268	3.07281e-06	0.68268	3.75061e-06	0.68268	4.54193e-06	0.68268	5.69885e-06
0.68512	2.48688e-06	0.68512	3.09448e-06	0.68512	3.77747e-06	0.68512	4.57672e-06	0.68512	5.74066e-06
0.68756	2.50336e-06	0.68756	3.11676e-06	0.68756	3.8028e-06	0.68756	4.60999e-06	0.68756	5.77789e-06
0.69	2.52014e-06	0.69	3.13965e-06	0.69	3.82904e-06	0.69	4.64447e-06	0.69	5.81848e-06
0.69244	2.53754e-06	0.69244	3.16223e-06	0.69244	3.85498e-06	0.69244	4.67865e-06	0.69244	5.85907e-06
0.69489	2.55463e-06	0.69489	3.18481e-06	0.69489	3.88184e-06	0.69489	4.71283e-06	0.69489	5.90149e-06
0.69733	2.5708e-06	0.69733	3.20679e-06	0.69733	3.90747e-06	0.69733	4.74548e-06	0.69733	5.93964e-06
0.69977	2.58789e-06	0.69977	3.22968e-06	0.69977	3.93433e-06	0.69977	4.78058e-06	0.69977	5.9787e-06
0.70221	2.60437e-06	0.70221	3.25043e-06	0.70221	3.95966e-06	0.70221	4.81262e-06	0.70221	6.01746e-06
0.70465	2.62146e-06	0.70465	3.27271e-06	0.70465	3.9856e-06	0.70465	4.8465e-06	0.70465	6.06079e-06
0.70709	2.63519e-06	0.70709	3.29559e-06	0.70709	4.01062e-06	0.70709	4.88007e-06	0.70709	6.09741e-06
0.70953	2.65228e-06	0.70953	3.31665e-06	0.70953	4.03687e-06	0.70953	4.91241e-06	0.70953	6.13708e-06
0.71198	2.66724e-06	0.71198	3.33923e-06	0.71198	4.06158e-06	0.71198	4.94507e-06	0.71198	6.17676e-06
0.71442	2.68372e-06	0.71442	3.36182e-06	0.71442	4.08691e-06	0.71442	4.97955e-06	0.71442	6.21643e-06
0.71686	2.69989e-06	0.71686	3.38104e-06	0.71686	4.11011e-06	0.71686	5.00977e-06	0.71686	6.25305e-06
0.7193	2.71545e-06	0.7193	3.40302e-06	0.7193	4.13513e-06	0.7193	5.04333e-06	0.7193	6.29272e-06
0.72174	2.7298e-06	0.72174	3.42255e-06	0.72174	4.15924e-06	0.72174	5.07446e-06	0.72174	6.32629e-06
0.72418	2.74475e-06	0.72418	3.44421e-06	0.72418	4.18335e-06	0.72418	5.10742e-06	0.72418	6.36597e-06
0.72662	2.7597e-06	0.72662	3.46344e-06	0.72662	4.20685e-06	0.72662	5.13763e-06	0.72662	6.40259e-06
0.72906	2.77435e-06	0.72906	3.4845e-06	0.72906	4.22913e-06	0.72906	5.16785e-06	0.72906	6.43921e-06
0.73151	2.7887e-06	0.73151	3.50433e-06	0.73151	4.25262e-06	0.73151	5.19928e-06	0.73151	6.47583e-06
0.73395	2.80334e-06	0.73395	3.52478e-06	0.73395	4.27551e-06	0.73395	5.23041e-06	0.73395	6.51245e-06
0.73639	2.81616e-06	0.73639	3.54309e-06	0.73639	4.29749e-06	0.73639	5.2597e-06	0.73639	6.54602e-06
0.73883	2.83112e-06	0.73883	3.56354e-06	0.73883	4.31946e-06	0.73883	5.29144e-06	0.73883	6.57959e-06
0.74127	2.84393e-06	0.74127	3.58276e-06	0.74127	4.34082e-06	0.74127	5.3183e-06	0.74127	6.61621e-06
0.74371	2.85736e-06	0.74371	3.60138e-06	0.74371	4.36188e-06	0.74371	5.34943e-06	0.74371	6.64978e-06
0.74615	2.86957e-06	0.74615	3.61847e-06	0.74615	4.38293e-06	0.74615	5.37598e-06	0.74615	6.6803e-06
0.7486	2.88086e-06	0.7486	3.63831e-06	0.7486	4.40216e-06	0.7486	5.40527e-06	0.7486	6.71387e-06
0.75104	2.89398e-06	0.75104	3.6554e-06	0.75104	4.42108e-06	0.75104	5.43365e-06	0.75104	6.74744e-06
0.75348	2.90619e-06	0.75348	3.67432e-06	0.75348	4.44244e-06	0.75348	5.46143e-06	0.75348	6.77795e-06
0.75592	2.91779e-06	0.75592	3.69019e-06	0.75592	4.45953e-06	0.75592	5.48676e-06	0.75592	6.80847e-06
0.75836	2.92908e-06	0.75836	3.7085e-06	0.75836	4.47937e-06	0.75836	5.51422e-06	0.75836	6.83899e-06
0.7608	2.94006e-06	0.7608	3.72345e-06	0.7608	4.49677e-06	0.7608	5.53925e-06	0.7608	6.86951e-06
0.76324	2.95013e-06	0.76324	3.74084e-06	0.76324	4.51538e-06	0.76324	5.56519e-06	0.76324	6.89697e-06
0.76569	2.95959e-06	0.76569	3.75458e-06	0.76569	4.52911e-06	0.76569	5.58868e-06	0.76569	6.92444e-06
0.76813	2.97058e-06	0.76813	3.77045e-06	0.76813	4.5459e-06	0.76813	5.61371e-06	0.76813	6.9519e-06
0.77057	2.97882e-06	0.77057	3.78662e-06	0.77057	4.56177e-06	0.77057	5.63568e-06	0.77057	6.97937e-06
0.77301	2.98889e-06	0.77301	3.80188e-06	0.77301	4.57672e-06	0.77301	5.66071e-06	0.77301	7.00378e-06
0.77545	2.99713e-06	0.77545	3.8147e-06	0.77545	4.58984e-06	0.77545	5.68115e-06	0.77545	7.0282e-06
0.77789	3.00507e-06	0.77789	3.82874e-06	0.77789	4.6048e-06	0.77789	5.70313e-06	0.77789	7.05261e-06
0.78033	3.01239e-06	0.78033	3.84094e-06	0.78033	4.617e-06	0.78033	5.72357e-06	0.78033	7.07397e-06
0.78278	3.02002e-06	0.78278	3.85376e-06	0.78278	4.62921e-06	0.78278	5.7431e-06	0.78278	7.09839e-06
0.78522	3.02673e-06	0.78522	3.86536e-06	0.78522	4.64081e-06	0.78522	5.76202e-06	0.78522	7.1167e-06
0.78766	3.03284e-06	0.78766	3.87573e-06	0.78766	4.65118e-06	0.78766	5.78033e-06	0.78766	7.13806e-06
0.7901	3.03802e-06	0.7901	3.88702e-06	0.7901	4.66003e-06	0.7901	5.79773e-06	0.7901	7.15637e-06
0.79254	3.04382e-06	0.79254	3.89679e-06	0.79254	4.67041e-06	0.79254	5.81512e-06	0.79254	7.17773e-06
0.79498	3.0481e-06	0.79498	3.90625e-06	0.79498	4.67773e-06	0.79498	5.83038e-06	0.79498	7.19299e-06
0.79742	3.05267e-06	0.79742	3.91602e-06	0.79742	4.68658e-06	0.79742	5.84808e-06	0.79742	7.20825e-06
0.79987	3.05756e-06	0.79987	3.92334e-06	0.79987	4.69238e-06	0.79987	5.86029e-06	0.79987	7.22351e-06
0.80231	3.06091e-06	0.80231	3.93188e-06	0.80231	4.6994e-06	0.80231	5.87463e-06	0.80231	7.23877e-06
0.80475	3.06305e-06	0.80475	3.9389e-06	0.80475	4.70337e-06	0.80475	5.88562e-06	0.80475	7.24792e-06
0.80719	3.0658e-06	0.80719	3.9447e-06	0.80719	4.70764e-06	0.80719	5.89722e-06	0.80719	7.26318e-06
0.80963	3.06702e-06	0.80963	3.95111e-06	0.80963	4.71222e-06	0.80963	5.90729e-06	0.80963	7.27234e-06
0.81207	3.06915e-06	0.81207	3.95599e-06	0.81207	4.71436e-06	0.81207	5.91766e-06	0.81207	7.28455e-06
0.81451	3.06885e-06	0.81451	3.96118e-06	0.81451	4.71527e-06	0.81451	5.92499e-06	0.81451	7.2876e-06
0.81696	3.06946e-06	0.81696	3.96484e-06	0.81696	4.7168e-06	0.81696	5.93292e-06	0.81696	7.29675e-06
0.8194	3.06915e-06	0.8194	3.96759e-06	0.8194	4.71588e-06	0.8194	5.93811e-06	0.8194	7.2998e-06
0.82184	3.06854e-06	0.82184	3.96973e-06	0.82184	4.71527e-06	0.82184	5.94421e-06	0.82184	7.30591e-06
0.82428	3.06702e-06	0.82428	3.97095e-06	0.82428	4.71222e-06	0.82428	5.94635e-06	0.82428	7.30591e-06
0.82672	3.06427e-06	0.82672	3.97156e-06	0.82672	4.70917e-06	0.82672	5.95001e-06	0.82672	7.30591e-06
0.82916	3.06274e-06	0.82916	3.97125e-06	0.82916	4.70642e-06	0.82916	5.95184e-06	0.82916	7.30591e-06
0.8316	3.06061e-06	0.8316	3.97247e-06	0.8316	4.70154e-06	0.8316	5.95306e-06	0.8316	7.30591e-06
0.83405	3.05511e-06	0.83405	3.96912e-06	0.83405	4.69452e-06	0.83405	5.95245e-06	0.83405	7.30286e-06
0.83649	3.05267e-06	0.83649	3.96881e-06	0.83649	4.68964e-06	0.83649	5.95184e-06	0.83649	7.2998e-06
0.83893	3.04657e-06	0.83893	3.96454e-06	0.83893	4.68079e-06	0.83893	5.94757e-06	0.83893	7.29065e-06
0.84137	3.04077e-06	0.84137	3.96179e-06	0.84137	4.67346e-06	0.84137	5.94452e-06	0.84137	7.28455e-06
0.84381	3.03528e-06	0.84381	3.9563e-06	0.84381	4.66339e-06	0.84381	5.93872e-06	0.84381	7.27539e-06
0.84625	3.02856e-06	0.84625	3.95203e-06	0.84625	4.65332e-06	0.84625	5.93262e-06	0.84625	7.26624e-06
0.84869	3.02216e-06	0.84869	3.94562e-06	0.84869	4.64294e-06	0.84869	5.9259e-06	0.84869	7.25403e-06
0.85114	3.01575e-06	0.85114	3.93982e-06	0.85114	4.63196e-06	0.85114	5.91736e-06	0.85114	7.24182e-06
0.85358	3.00659e-06	0.85358	3.9328e-06	0.85358	4.61823e-06	0.85358	5.90698e-06	0.85358	7.22656e-06
0.85602	2.99988e-06	0.85602	3.92517e-06	0.85602	4.60663e-06	0.85602	5.89874e-06	0.85602	7.21436e-06
0.85846	2.99072e-06	0.85846	3.91541e-06	0.85846	4.59198e-06	0.85846	5.88531e-06	0.85846	7.19604e-06
0.8609	2.98218e-06	0.8609	3.90594e-06	0.8609	4.57703e-06	0.8609	5.8728e-06	0.8609	7.17773e-06
0.86334	2.97363e-06	0.86334	3.89496e-06	0.86334	4.56146e-06	0.86334	5.85785e-06	0.86334	7.15942e-06
0.86578	2.96387e-06	0.86578	3.88519e-06	0.86578	4.5462e-06	0.86578	5.8429e-06	0.86578	7.13806e-06
0.86823	2.95288e-06	0.86823	3.87604e-06	0.86823	4.52942e-06	0.86823	5.82672e-06	0.86823	7.1167e-06
0.87067	2.94464e-06	0.87067	3.86353e-06	0.87067	4.51355e-06	0.87067	5.81146e-06	0.87067	7.09534e-06
0.87311	2.93365e-06	0.87311	3.85132e-06	0.87311	4.49615e-06	0.87311	5.79285e-06	0.87311	7.07092e-06
0.87555	2.92389e-06	0.87555	3.83881e-06	0.87555	4.47876e-06	0.87555	5.77423e-06	0.87555	7.04651e-06
0.87799	2.91229e-06	0.87799	3.82446e-06	0.87799	4.45923e-06	0.87799	5.75439e-06	0.87799	7.02209e-06
0.88043	2.90131e-06	0.88043	3.81226e-06	0.88043	4.44214e-06	0.88043	5.73486e-06	0.88043	6.99463e-06
0.88287	2.89124e-06	0.88287	3.79852e-06	0.88287	4.42291e-06	0.88287	5.71259e-06	0.88287	6.96716e-06
0.88531	2.88055e-06	0.88531	3.7854e-06	0.88531	4.4046e-06	0.88531	5.69061e-06	0.88531	6.9397e-06
0.88776	2.86896e-06	0.88776	3.76984e-06	0.88776	4.38599e-06	0.88776	5.66864e-06	0.88776	6.91223e-06
0.8902	2.85889e-06	0.8902	3.7558e-06	0.8902	4.36707e-06	0.8902	5.64636e-06	0.8902	6.88477e-06
0.89264	2.84698e-06	0.89264	3.73993e-06	0.89264	4.34723e-06	0.89264	5.62195e-06	0.89264	6.8512e-06
0.89508	2.8363e-06	0.89508	3.72711e-06	0.89508	4.328e-06	0.89508	5.59937e-06	0.89508	6.82373e-06
0.89752	2.82623e-06	0.89752	3.71002e-06	0.89752	4.30878e-06	0.89752	5.57312e-06	0.89752	6.79016e-06
0.89996	2.81586e-06	0.89996	3.69537e-06	0.89996	4.28864e-06	0.89996	5.55054e-06	0.89996	6.7627e-06
0.9024	2.80457e-06	0.9024	3.6792e-06	0.9024	4.27002e-06	0.9024	5.52429e-06	0.9024	6.72913e-06
0.90485	2.79388e-06	0.90485	3.66394e-06	0.90485	4.25171e-06	0.90485	5.49988e-06	0.90485	6.69861e-06
0.90729	2.78259e-06	0.90729	3.64868e-06	0.90729	4.23218e-06	0.90729	5.47394e-06	0.90729	6.66809e-06
0.90973	2.77252e-06	0.90973	3.63342e-06	0.90973	4.21326e-06	0.90973	5.45013e-06	0.90973	6.63757e-06
0.91217	2.76154e-06	0.91217	3.61816e-06	0.91217	4.19312e-06	0.91217	5.42358e-06	0.91217	6.604e-06
0.91461	2.75269e-06	0.91461	3.6026e-06	0.91461	4.17572e-06	0.91461	5.39886e-06	0.91461	6.57654e-06
0.91705	2.74078e-06	0.91705	3.58734e-06	0.91705	4.15649e-06	0.91705	5.37262e-06	0.91705	6.54297e-06
0.91949	2.73254e-06	0.91949	3.573e-06	0.91949	4.13849e-06	0.91949	5.3476e-06	0.91949	6.51245e-06
0.92194	2.72186e-06	0.92194	3.55713e-06	0.92194	4.11926e-06	0.92194	5.32166e-06	0.92194	6.48193e-06
0.92438	2.7121e-06	0.92438	3.54156e-06	0.92438	4.10004e-06	0.92438	5.29694e-06	0.92438	6.45142e-06
0.92682	2.70203e-06	0.92682	3.52783e-06	0.92682	4.08203e-06	0.92682	5.27191e-06	0.92682	6.4209e-06
0.92926	2.69318e-06	0.92926	3.51349e-06	0.92926	4.06494e-06	0.92926	5.24689e-06	0.92926	6.39038e-06
0.9317	2.68311e-06	0.9317	3.49701e-06	0.9317	4.04633e-06	0.9317	5.22095e-06	0.9317	6.35986e-06
0.93414	2.67395e-06	0.93414	3.48297e-06	0.93414	4.02954e-06	0.93414	5.19745e-06	0.93414	6.3324e-06
0.93658	2.66571e-06	0.93658	3.46924e-06	0.93658	4.01215e-06	0.93658	5.17181e-06	0.93658	6.30188e-06
0.93903	2.65594e-06	0.93903	3.45428e-06	0.93903	3.99536e-06	0.93903	5.14954e-06	0.93903	6.27441e-06
0.94147	2.64862e-06	0.94147	3.43994e-06	0.94147	3.97827e-06	0.94147	5.12451e-06	0.94147	6.2439e-06
0.94391	2.63885e-06	0.94391	3.42651e-06	0.94391	3.9621e-06	0.94391	5.10071e-06	0.94391	6.21338e-06
0.94635	2.63092e-06	0.94635	3.41339e-06	0.94635	3.94592e-06	0.94635	5.0766e-06	0.94635	6.18591e-06
0.94879	2.6236e-06	0.94879	3.39935e-06	0.94879	3.92883e-06	0.94879	5.05371e-06	0.94879	6.15845e-06
0.95123	2.61444e-06	0.95123	3.38715e-06	0.95123	3.91357e-06	0.95123	5.03052e-06	0.95123	6.13098e-06
0.95367	2.6062e-06	0.95367	3.37372e-06	0.95367	3.89862e-06	0.95367	5.00854e-06	0.95367	6.10352e-06
0.95612	2.59796e-06	0.95612	3.35968e-06	0.95612	3.88245e-06	0.95612	4.98474e-06	0.95612	6.07605e-06
0.95856	2.59155e-06	0.95856	3.34686e-06	0.95856	3.86749e-06	0.95856	4.96307e-06	0.95856	6.05164e-06
0.961	2.58392e-06	0.961	3.33557e-06	0.961	3.85132e-06	0.961	4.94049e-06	0.961	6.02417e-06
0.96344	2.57507e-06	0.96344	3.32245e-06	0.96344	3.83728e-06	0.96344	4.91882e-06	0.96344	5.99976e-06
0.96588	2.56866e-06	0.96588	3.31177e-06	0.96588	3.82233e-06	0.96588	4.89716e-06	0.96588	5.97229e-06
0.96832	2.56256e-06	0.96832	3.29956e-06	0.96832	3.8089e-06	0.96832	4.87671e-06	0.96832	5.94788e-06
0.97076	2.55371e-06	0.97076	3.28644e-06	0.97076	3.79395e-06	0.97076	4.85596e-06	0.97076	5.92346e-06
0.97321	2.547e-06	0.97321	3.27545e-06	0.97321	3.78143e-06	0.97321	4.83673e-06	0.97321	5.89905e-06
0.97565	2.54089e-06	0.97565	3.26477e-06	0.97565	3.76831e-06	0.97565	4.81567e-06	0.97565	5.87463e-06
0.97809	2.53326e-06	0.97809	3.25348e-06	0.97809	3.75336e-06	0.97809	4.79614e-06	0.97809	5.85327e-06
0.98053	2.52686e-06	0.98053	3.24158e-06	0.98053	3.74054e-06	0.98053	4.77539e-06	0.98053	5.82886e-06
0.98297	2.52014e-06	0.98297	3.2312e-06	0.98297	3.72742e-06	0.98297	4.75708e-06	0.98297	5.80444e-06
0.98541	2.51373e-06	0.98541	3.21991e-06	0.98541	3.71521e-06	0.98541	4.73755e-06	0.98541	5.78003e-06
0.98785	2.50793e-06	0.98785	3.20984e-06	0.98785	3.703e-06	0.98785	4.71954e-06	0.98785	5.76172e-06
0.9903	2.49969e-06	0.9903	3.19885e-06	0.9903	3.6908e-06	0.9903	4.70032e-06	0.9903	5.7373e-06
0.99274	2.49542e-06	0.99274	3.18878e-06	0.99274	3.67737e-06	0.99274	4.68353e-06	0.99274	5.71594e-06
0.99518	2.48871e-06	0.99518	3.17749e-06	0.99518	3.66577e-06	0.99518	4.66522e-06	0.99518	5.69458e-06
0.99762	2.48413e-06	0.99762	3.16864e-06	0.99762	3.65326e-06	0.99762	4.64844e-06	0.99762	5.67322e-06
1.00006	2.47742e-06	1.00006	3.15826e-06	1.00006	3.64105e-06	1.00006	4.62982e-06	1.00006	5.65186e-06
1.0025	2.47162e-06	1.0025	3.1488e-06	1.0025	3.63007e-06	1.0025	4.61334e-06	1.0025	5.63354e-06
1.00494	2.46521e-06	1.00494	3.13873e-06	1.00494	3.61938e-06	1.00494	4.59778e-06	1.00494	5.61218e-06
1.00739	2.46063e-06	1.00739	3.13141e-06	1.00739	3.60748e-06	1.00739	4.57977e-06	1.00739	5.59082e-06
1.00983	2.45453e-06	1.00983	3.12134e-06	1.00983	3.59589e-06	1.00983	4.56329e-06	1.00983	5.57251e-06
1.01227	2.44995e-06	1.01227	3.11279e-06	1.01227	3.58582e-06	1.01227	4.54865e-06	1.01227	5.5542e-06
1.01471	2.44415e-06	1.01471	3.10333e-06	1.01471	3.57513e-06	1.01471	4.53125e-06	1.01471	5.53284e-06
1.01715	2.43927e-06	1.01715	3.09418e-06	1.01715	3.56415e-06	1.01715	4.5166e-06	1.01715	5.51758e-06
1.01959	2.43469e-06	1.01959	3.08563e-06	1.01959	3.55377e-06	1.01959	4.50104e-06	1.01959	5.49622e-06
1.02203	2.4295e-06	1.02203	3.07648e-06	1.02203	3.5434e-06	1.02203	4.48517e-06	1.02203	5.47791e-06
1.02448	2.42554e-06	1.02448	3.06793e-06	1.02448	3.5321e-06	1.02448	4.47083e-06	1.02448	5.46265e-06
1.02692	2.41882e-06	1.02692	3.06091e-06	1.02692	3.52356e-06	1.02692	4.45618e-06	1.02692	5.44434e-06
1.02936	2.41486e-06	1.02936	3.05176e-06	1.02936	3.51105e-06	1.02936	4.44183e-06	1.02936	5.42603e-06
1.0318	2.40967e-06	1.0318	3.04413e-06	1.0318	3.50311e-06	1.0318	4.42871e-06	1.0318	5.41077e-06
1.03424	2.40601e-06	1.03424	3.03467e-06	1.03424	3.49182e-06	1.03424	4.41223e-06	1.03424	5.3894e-06
1.03668	2.40173e-06	1.03668	3.02856e-06	1.03668	3.48267e-06	1.03668	4.39941e-06	1.03668	5.3772e-06
1.03912	2.39685e-06	1.03912	3.02032e-06	1.03912	3.4729e-06	1.03912	4.38477e-06	1.03912	5.35889e-06
1.04156	2.39288e-06	1.04156	3.01331e-06	1.04156	3.46252e-06	1.04156	4.37103e-06	1.04156	5.34363e-06
1.04401	2.38922e-06	1.04401	3.00446e-06	1.04401	3.45551e-06	1.04401	4.35852e-06	1.04401	5.32837e-06
1.04645	2.38464e-06	1.04645	2.99774e-06	1.04645	3.44482e-06	1.04645	4.34479e-06	1.04645	5.31311e-06
1.04889	2.38159e-06	1.04889	2.99042e-06	1.04889	3.43628e-06	1.04889	4.33197e-06	1.04889	5.2948e-06
1.05133	2.3764e-06	1.05133	2.9837e-06	1.05133	3.42773e-06	1.05133	4.31824e-06	1.05133	5.27954e-06
1.05377	2.37305e-06	1.05377	2.97607e-06	1.05377	3.41797e-06	1.05377	4.30511e-06	1.05377	5.26428e-06
1.05621	2.36938e-06	1.05621	2.96753e-06	1.05621	3.40912e-06	1.05621	4.29291e-06	1.05621	5.25208e-06
1.05865	2.36633e-06	1.05865	2.96112e-06	1.05865	3.40027e-06	1.05865	4.28101e-06	1.05865	5.23682e-06
1.0611	2.36176e-06	1.0611	2.95471e-06	1.0611	3.39264e-06	1.0611	4.26819e-06	1.0611	5.22156e-06
1.06354	2.35779e-06	1.06354	2.94678e-06	1.06354	3.38348e-06	1.06354	4.25629e-06	1.06354	5.2063e-06
1.06598	2.35443e-06	1.06598	2.94067e-06	1.06598	3.37555e-06	1.06598	4.24408e-06	1.06598	5.19409e-06
1.06842	2.35138e-06	1.06842	2.93396e-06	1.06842	3.36731e-06	1.06842	4.23218e-06	1.06842	5.17883e-06
1.07086	2.34894e-06	1.07086	2.92694e-06	1.07086	3.35907e-06	1.07086	4.21967e-06	1.07086	5.16663e-06
1.0733	2.34497e-06	1.0733	2.92206e-06	1.0733	3.35144e-06	1.0733	4.20868e-06	1.0733	5.15137e-06
1.07574	2.34253e-06	1.07574	2.91595e-06	1.07574	3.34473e-06	1.07574	4.19769e-06	1.07574	5.13916e-06
1.07819	2.34039e-06	1.07819	2.90833e-06	1.07819	3.33679e-06	1.07819	4.18579e-06	1.07819	5.12695e-06
1.08063	2.33704e-06	1.08063	2.90314e-06	1.08063	3.32947e-06	1.08063	4.1745e-06	1.08063	5.11475e-06
1.08307	2.33337e-06	1.08307	2.89642e-06	1.08307	3.32214e-06	1.08307	4.16382e-06	1.08307	5.10254e-06
1.08551	2.33185e-06	1.08551	2.89124e-06	1.08551	3.31512e-06	1.08551	4.15283e-06	1.08551	5.09033e-06
1.08795	2.32758e-06	1.08795	2.88483e-06	1.08795	3.30719e-06	1.08795	4.14185e-06	1.08795	5.07507e-06
1.09039	2.32605e-06	1.09039	2.88025e-06	1.09039	3.29987e-06	1.09039	4.13208e-06	1.09039	5.06592e-06
1.09283	2.323e-06	1.09283	2.87476e-06	1.09283	3.29407e-06	1.09283	4.1214e-06	1.09283	5.05066e-06
1.09528	2.32056e-06	1.09528	2.86865e-06	1.09528	3.28735e-06	1.09528	4.11072e-06	1.09528	5.0415e-06
1.09772	2.31873e-06	1.09772	2.86407e-06	1.09772	3.28125e-06	1.09772	4.09912e-06	1.09772	5.0293e-06
1.10016	2.31812e-06	1.10016	2.85797e-06	1.10016	3.27515e-06	1.10016	4.09027e-06	1.10016	5.01709e-06
1.1026	2.31506e-06	1.1026	2.854e-06	1.1026	3.26874e-06	1.1026	4.0799e-06	1.1026	5.00793e-06
1.10504	2.31384e-06	1.10504	2.85004e-06	1.10504	3.26385e-06	1.10504	4.07043e-06	1.10504	4.99878e-06
1.10748	2.31079e-06	1.10748	2.84454e-06	1.10748	3.25745e-06	1.10748	4.06281e-06	1.10748	4.98657e-06
1.10992	2.3111e-06	1.10992	2.84058e-06	1.10992	3.25256e-06	1.10992	4.05243e-06	1.10992	4.97742e-06
1.11237	2.30896e-06	1.11237	2.83478e-06	1.11237	3.24738e-06	1.11237	4.04297e-06	1.11237	4.96521e-06
1.11481	2.30865e-06	1.11481	2.83173e-06	1.11481	3.24341e-06	1.11481	4.03442e-06	1.11481	4.95605e-06
1.11725	2.30591e-06	1.11725	2.82776e-06	1.11725	3.23822e-06	1.11725	4.02618e-06	1.11725	4.94568e-06
1.11969	2.30652e-06	1.11969	2.82288e-06	1.11969	3.23242e-06	1.11969	4.01733e-06	1.11969	4.93805e-06
1.12213	2.30438e-06	1.12213	2.81982e-06	1.12213	3.22937e-06	1.12213	4.0097e-06	1.12213	4.92828e-06
1.12457	2.3053e-06	1.12457	2.81738e-06	1.12457	3.2251e-06	1.12457	4.00238e-06	1.12457	4.92004e-06
1.12701	2.30438e-06	1.12701	2.81189e-06	1.12701	3.2196e-06	1.12701	3.99536e-06	1.12701	4.9115e-06
1.12946	2.30347e-06	1.12946	2.81036e-06	1.12946	3.21655e-06	1.12946	3.9859e-06	1.12946	4.90295e-06
1.1319	2.30194e-06	1.1319	2.80579e-06	1.1319	3.2132e-06	1.1319	3.9798e-06	1.1319	4.89441e-06
1.13434	2.30316e-06	1.13434	2.80334e-06	1.13434	3.21045e-06	1.13434	3.97308e-06	1.13434	4.88831e-06
1.13678	2.30225e-06	1.13678	2.79938e-06	1.13678	3.20679e-06	1.13678	3.96606e-06	1.13678	4.88037e-06
1.13922	2.30255e-06	1.13922	2.79877e-06	1.13922	3.20282e-06	1.13922	3.95935e-06	1.13922	4.87396e-06
1.14166	2.30316e-06	1.14166	2.79541e-06	1.14166	3.2016e-06	1.14166	3.95416e-06	1.14166	4.86786e-06
1.1441	2.30438e-06	1.1441	2.79388e-06	1.1441	3.19885e-06	1.1441	3.94775e-06	1.1441	4.86115e-06
1.14655	2.30469e-06	1.14655	2.79114e-06	1.14655	3.19641e-06	1.14655	3.94165e-06	1.14655	4.85474e-06
1.14899	2.30652e-06	1.14899	2.78931e-06	1.14899	3.19458e-06	1.14899	3.93707e-06	1.14899	4.85016e-06
1.15143	2.30652e-06	1.15143	2.78625e-06	1.15143	3.19214e-06	1.15143	3.9325e-06	1.15143	4.84344e-06
1.15387	2.30682e-06	1.15387	2.78809e-06	1.15387	3.19122e-06	1.15387	3.92731e-06	1.15387	4.84009e-06
1.15631	2.30865e-06	1.15631	2.78503e-06	1.15631	3.19092e-06	1.15631	3.92181e-06	1.15631	4.83582e-06
1.15875	2.31018e-06	1.15875	2.78412e-06	1.15875	3.19e-06	1.15875	3.91785e-06	1.15875	4.83093e-06
1.16119	2.31232e-06	1.16119	2.7829e-06	1.16119	3.18756e-06	1.16119	3.91418e-06	1.16119	4.82849e-06
1.16364	2.31384e-06	1.16364	2.7829e-06	1.16364	3.18848e-06	1.16364	3.91144e-06	1.16364	4.82574e-06
1.16608	2.31628e-06	1.16608	2.78168e-06	1.16608	3.18817e-06	1.16608	3.90747e-06	1.16608	4.82178e-06
1.16852	2.31903e-06	1.16852	2.78229e-06	1.16852	3.18909e-06	1.16852	3.90442e-06	1.16852	4.81873e-06
1.17096	2.31934e-06	1.17096	2.78107e-06	1.17096	3.18817e-06	1.17096	3.90076e-06	1.17096	4.81598e-06
1.1734	2.32239e-06	1.1734	2.78168e-06	1.1734	3.18787e-06	1.1734	3.89862e-06	1.1734	4.81537e-06
1.17584	2.32483e-06	1.17584	2.78168e-06	1.17584	3.18878e-06	1.17584	3.89587e-06	1.17584	4.81415e-06
1.17828	2.32788e-06	1.17828	2.78259e-06	1.17828	3.19031e-06	1.17828	3.89465e-06	1.17828	4.81415e-06
1.18073	2.33032e-06	1.18073	2.78381e-06	1.18073	3.19031e-06	1.18073	3.89252e-06	1.18073	4.81262e-06
1.18317	2.33398e-06	1.18317	2.78625e-06	1.18317	3.19336e-06	1.18317	3.8913e-06	1.18317	4.81323e-06
1.18561	2.33643e-06	1.18561	2.78503e-06	1.18561	3.19366e-06	1.18561	3.89099e-06	1.18561	4.81445e-06
1.18805	2.3407e-06	1.18805	2.78778e-06	1.18805	3.19794e-06	1.18805	3.88977e-06	1.18805	4.81689e-06
1.19049	2.34406e-06	1.19049	2.78931e-06	1.19049	3.19855e-06	1.19049	3.88916e-06	1.19049	4.81689e-06
1.19293	2.34955e-06	1.19293	2.79266e-06	1.19293	3.20129e-06	1.19293	3.88824e-06	1.19293	4.81903e-06
1.19537	2.35229e-06	1.19537	2.79358e-06	1.19537	3.20343e-06	1.19537	3.88733e-06	1.19537	4.82086e-06
1.19781	2.35687e-06	1.19781	2.79572e-06	1.19781	3.20587e-06	1.19781	3.88855e-06	1.19781	4.82361e-06
1.20026	2.36145e-06	1.20026	2.79846e-06	1.20026	3.20984e-06	1.20026	3.88824e-06	1.20026	4.82697e-06
1.2027	2.36633e-06	1.2027	2.8009e-06	1.2027	3.2132e-06	1.2027	3.89008e-06	1.2027	4.83154e-06
1.20514	2.37213e-06	1.20514	2.80334e-06	1.20514	3.21777e-06	1.20514	3.89069e-06	1.20514	4.83429e-06
1.20758	2.37701e-06	1.20758	2.80731e-06	1.20758	3.22174e-06	1.20758	3.89282e-06	1.20758	4.84009e-06
1.21002	2.3819e-06	1.21002	2.81006e-06	1.21002	3.22418e-06	1.21002	3.89313e-06	1.21002	4.84161e-06
1.21246	2.38861e-06	1.21246	2.81403e-06	1.21246	3.23029e-06	1.21246	3.89618e-06	1.21246	4.84985e-06
1.2149	2.39532e-06	1.2149	2.8183e-06	1.2149	3.23425e-06	1.2149	3.89893e-06	1.2149	4.85352e-06
1.21735	2.40051e-06	1.21735	2.82318e-06	1.21735	3.24005e-06	1.21735	3.90167e-06	1.21735	4.85931e-06
1.21979	2.40723e-06	1.21979	2.82776e-06	1.21979	3.24402e-06	1.21979	3.90503e-06	1.21979	4.86572e-06
1.22223	2.41394e-06	1.22223	2.83325e-06	1.22223	3.25134e-06	1.22223	3.90778e-06	1.22223	4.87396e-06
1.22467	2.41974e-06	1.22467	2.83783e-06	1.22467	3.25623e-06	1.22467	3.91144e-06	1.22467	4.87885e-06
1.22711	2.42767e-06	1.22711	2.84302e-06	1.22711	3.26294e-06	1.22711	3.91541e-06	1.22711	4.88708e-06
1.22955	2.435e-06	1.22955	2.84882e-06	1.22955	3.26904e-06	1.22955	3.91937e-06	1.22955	4.8938e-06
1.23199	2.44141e-06	1.23199	2.854e-06	1.23199	3.27667e-06	1.23199	3.92548e-06	1.23199	4.90265e-06
1.23444	2.45026e-06	1.23444	2.8598e-06	1.23444	3.28308e-06	1.23444	3.93066e-06	1.23444	4.91058e-06
1.23688	2.45728e-06	1.23688	2.86652e-06	1.23688	3.29163e-06	1.23688	3.93494e-06	1.23688	4.92157e-06
1.23932	2.4646e-06	1.23932	2.87292e-06	1.23932	3.29895e-06	1.23932	3.94104e-06	1.23932	4.9295e-06
1.24176	2.47437e-06	1.24176	2.88025e-06	1.24176	3.30719e-06	1.24176	3.94867e-06	1.24176	4.93988e-06
1.2442	2.48291e-06	1.2442	2.88727e-06	1.2442	3.3136e-06	1.2442	3.95477e-06	1.2442	4.95056e-06
1.24664	2.49084e-06	1.24664	2.8952e-06	1.24664	3.32306e-06	1.24664	3.96118e-06	1.24664	4.96277e-06
1.24908	2.5e-06	1.24908	2.90222e-06	1.24908	3.33191e-06	1.24908	3.96881e-06	1.24908	4.97192e-06
1.25153	2.50977e-06	1.25153	2.91107e-06	1.25153	3.34198e-06	1.25153	3.97705e-06	1.25153	4.98474e-06
1.25397	2.51831e-06	1.25397	2.9184e-06	1.25397	3.35052e-06	1.25397	3.98499e-06	1.25397	4.99725e-06
1.25641	2.52777e-06	1.25641	2.92847e-06	1.25641	3.36151e-06	1.25641	3.99292e-06	1.25641	5.01038e-06
1.25885	2.53845e-06	1.25885	2.93762e-06	1.25885	3.37311e-06	1.25885	4.00269e-06	1.25885	5.02411e-06
1.26129	2.54913e-06	1.26129	2.948e-06	1.26129	3.3844e-06	1.26129	4.01276e-06	1.26129	5.03845e-06
1.26373	2.56012e-06	1.26373	2.95593e-06	1.26373	3.396e-06	1.26373	4.0213e-06	1.26373	5.0531e-06
1.26617	2.5708e-06	1.26617	2.966e-06	1.26617	3.4082e-06	1.26617	4.03198e-06	1.26617	5.06927e-06
1.26862	2.58209e-06	1.26862	2.97455e-06	1.26862	3.42072e-06	1.26862	4.04297e-06	1.26862	5.08514e-06
1.27106	2.59369e-06	1.27106	2.98645e-06	1.27106	3.43384e-06	1.27106	4.05457e-06	1.27106	5.10101e-06
1.2735	2.60468e-06	1.2735	2.99835e-06	1.2735	3.44696e-06	1.2735	4.06647e-06	1.2735	5.11871e-06
1.27594	2.61688e-06	1.27594	3.00873e-06	1.27594	3.45978e-06	1.27594	4.07745e-06	1.27594	5.13672e-06
1.27838	2.62939e-06	1.27838	3.02063e-06	1.27838	3.47565e-06	1.27838	4.09027e-06	1.27838	5.1535e-06
1.28082	2.64191e-06	1.28082	3.03223e-06	1.28082	3.48999e-06	1.28082	4.104e-06	1.28082	5.17578e-06
1.28326	2.65411e-06	1.28326	3.04321e-06	1.28326	3.50433e-06	1.28326	4.11713e-06	1.28326	5.19409e-06
1.28571	2.66663e-06	1.28571	3.05756e-06	1.28571	3.52081e-06	1.28571	4.13086e-06	1.28571	5.21484e-06
1.28815	2.68005e-06	1.28815	3.06854e-06	1.28815	3.53668e-06	1.28815	4.14642e-06	1.28815	5.23529e-06
1.29059	2.69257e-06	1.29059	3.0835e-06	1.29059	3.55316e-06	1.29059	4.16016e-06	1.29059	5.25818e-06
1.29303	2.70691e-06	1.29303	3.09692e-06	1.29303	3.56873e-06	1.29303	4.17572e-06	1.29303	5.27863e-06
1.29547	2.72217e-06	1.29547	3.11005e-06	1.29547	3.58582e-06	1.29547	4.19189e-06	1.29547	5.30182e-06
1.29791	2.7359e-06	1.29791	3.12286e-06	1.29791	3.60352e-06	1.29791	4.20807e-06	1.29791	5.32501e-06
1.30035	2.75116e-06	1.30035	3.13904e-06	1.30035	3.62244e-06	1.30035	4.22546e-06	1.30035	5.35065e-06
1.3028	2.7655e-06	1.3028	3.15399e-06	1.3028	3.64136e-06	1.3028	4.24194e-06	1.3028	5.37109e-06
1.30524	2.78168e-06	1.30524	3.16895e-06	1.30524	3.65875e-06	1.30524	4.26056e-06	1.30524	5.39886e-06
1.30768	2.79633e-06	1.30768	3.18359e-06	1.30768	3.67798e-06	1.30768	4.27795e-06	1.30768	5.42358e-06
1.31012	2.81311e-06	1.31012	3.19977e-06	1.31012	3.69843e-06	1.31012	4.29779e-06	1.31012	5.45135e-06
1.31256	2.82959e-06	1.31256	3.21686e-06	1.31256	3.71704e-06	1.31256	4.31702e-06	1.31256	5.47668e-06
1.315	2.84576e-06	1.315	3.23456e-06	1.315	3.7384e-06	1.315	4.33685e-06	1.315	5.50415e-06
1.31744	2.86224e-06	1.31744	3.25043e-06	1.31744	3.75702e-06	1.31744	4.35791e-06	1.31744	5.53131e-06
1.31989	2.88086e-06	1.31989	3.26874e-06	1.31989	3.77869e-06	1.31989	4.37836e-06	1.31989	5.56335e-06
1.32233	2.89795e-06	1.32233	3.28552e-06	1.32233	3.79913e-06	1.32233	4.39941e-06	1.32233	5.59052e-06
1.32477	2.91687e-06	1.32477	3.30505e-06	1.32477	3.82294e-06	1.32477	4.4223e-06	1.32477	5.62225e-06
1.32721	2.93335e-06	1.32721	3.32336e-06	1.32721	3.84491e-06	1.32721	4.44458e-06	1.32721	5.65094e-06
1.32965	2.95258e-06	1.32965	3.3429e-06	1.32965	3.86902e-06	1.32965	4.46747e-06	1.32965	5.6839e-06
1.33209	2.97241e-06	1.33209	3.36121e-06	1.33209	3.89221e-06	1.33209	4.49188e-06	1.33209	5.71442e-06
1.33453	2.99103e-06	1.33453	3.38318e-06	1.33453	3.9151e-06	1.33453	4.51538e-06	1.33453	5.7486e-06
1.33698	3.00995e-06	1.33698	3.4024e-06	1.33698	3.93951e-06	1.33698	4.53918e-06	1.33698	5.78094e-06
1.33942	3.0307e-06	1.33942	3.4259e-06	1.33942	3.96606e-06	1.33942	4.56482e-06	1.33942	5.81573e-06
1.34186	3.05023e-06	1.34186	3.44513e-06	1.34186	3.98895e-06	1.34186	4.58984e-06	1.34186	5.84961e-06
1.3443	3.07251e-06	1.3443	3.4671e-06	1.3443	4.01581e-06	1.3443	4.617e-06	1.3443	5.88654e-06
1.34674	3.09265e-06	1.34674	3.48846e-06	1.34674	4.04205e-06	1.34674	4.64355e-06	1.34674	5.92041e-06
1.34918	3.11371e-06	1.34918	3.51105e-06	1.34918	4.06952e-06	1.34918	4.67194e-06	1.34918	5.95856e-06
1.35162	3.13599e-06	1.35162	3.53302e-06	1.35162	4.09515e-06	1.35162	4.69971e-06	1.35162	5.99365e-06
1.35406	3.15613e-06	1.35406	3.55713e-06	1.35406	4.12231e-06	1.35406	4.72839e-06	1.35406	6.03271e-06
1.35651	3.17932e-06	1.35651	3.58093e-06	1.35651	4.1507e-06	1.35651	4.75647e-06	1.35651	6.073e-06
1.35895	3.20313e-06	1.35895	3.60565e-06	1.35895	4.1803e-06	1.35895	4.78668e-06	1.35895	6.11267e-06
1.36139	3.2254e-06	1.36139	3.62946e-06	1.36139	4.20776e-06	1.36139	4.8172e-06	1.36139	6.15234e-06
1.36383	3.24951e-06	1.36383	3.65479e-06	1.36383	4.23798e-06	1.36383	4.84802e-06	1.36383	6.19202e-06
1.36627	3.27209e-06	1.36627	3.67981e-06	1.36627	4.26697e-06	1.36627	4.87793e-06	1.36627	6.23169e-06
1.36871	3.29742e-06	1.36871	3.70392e-06	1.36871	4.29749e-06	1.36871	4.90936e-06	1.36871	6.27441e-06
1.37115	3.32062e-06	1.37115	3.73016e-06	1.37115	4.32953e-06	1.37115	4.94202e-06	1.37115	6.31714e-06
1.3736	3.34564e-06	1.3736	3.75671e-06	1.3736	4.35883e-06	1.3736	4.97528e-06	1.3736	6.35986e-06
1.37604	3.37158e-06	1.37604	3.78326e-06	1.37604	4.39087e-06	1.37604	5.00702e-06	1.37604	6.40259e-06
1.37848	3.39752e-06	1.37848	3.81287e-06	1.37848	4.42322e-06	1.37848	5.04059e-06	1.37848	6.44836e-06
1.38092	3.42255e-06	1.38092	3.8382e-06	1.38092	4.45679e-06	1.38092	5.07446e-06	1.38092	6.49414e-06
1.38336	3.4491e-06	1.38336	3.8678e-06	1.38336	4.48975e-06	1.38336	5.11108e-06	1.38336	6.53992e-06
1.3858	3.47504e-06	1.3858	3.89526e-06	1.3858	4.52301e-06	1.3858	5.14465e-06	1.3858	6.58264e-06
1.38824	3.50159e-06	1.38824	3.92548e-06	1.38824	4.5578e-06	1.38824	5.18188e-06	1.38824	6.63147e-06
1.39069	3.52814e-06	1.39069	3.95325e-06	1.39069	4.59076e-06	1.39069	5.21637e-06	1.39069	6.67725e-06
1.39313	3.55591e-06	1.39313	3.98285e-06	1.39313	4.62738e-06	1.39313	5.25391e-06	1.39313	6.72607e-06
1.39557	3.58368e-06	1.39557	4.01459e-06	1.39557	4.66248e-06	1.39557	5.29114e-06	1.39557	6.7749e-06
1.39801	3.61298e-06	1.39801	4.04541e-06	1.39801	4.69849e-06	1.39801	5.32928e-06	1.39801	6.82373e-06
1.40045	3.64105e-06	1.40045	4.07593e-06	1.40045	4.73389e-06	1.40045	5.36774e-06	1.40045	6.87256e-06
1.40289	3.66974e-06	1.40289	4.10797e-06	1.40289	4.77173e-06	1.40289	5.40741e-06	1.40289	6.92444e-06
1.40533	3.70056e-06	1.40533	4.13818e-06	1.40533	4.80713e-06	1.40533	5.44556e-06	1.40533	6.97327e-06
1.40778	3.72955e-06	1.40778	4.17175e-06	1.40778	4.84467e-06	1.40778	5.48584e-06	1.40778	7.02515e-06
1.41022	3.75885e-06	1.41022	4.20288e-06	1.41022	4.88251e-06	1.41022	5.5249e-06	1.41022	7.07703e-06
1.41266	3.78967e-06	1.41266	4.23553e-06	1.41266	4.92035e-06	1.41266	5.56519e-06	1.41266	7.12891e-06
1.4151	3.81958e-06	1.4151	4.2688e-06	1.4151	4.96002e-06	1.4151	5.60547e-06	1.4151	7.18079e-06
1.41754	3.85315e-06	1.41754	4.3045e-06	1.41754	5.00122e-06	1.41754	5.64972e-06	1.41754	7.23572e-06
1.41998	3.88214e-06	1.41998	4.33746e-06	1.41998	5.03845e-06	1.41998	5.69092e-06	1.41998	7.2876e-06
1.42242	3.91541e-06	1.42242	4.37073e-06	1.42242	5.07996e-06	1.42242	5.73517e-06	1.42242	7.34253e-06
1.42487	3.94653e-06	1.42487	4.40643e-06	1.42487	5.11902e-06	1.42487	5.77637e-06	1.42487	7.39746e-06
1.42731	3.9801e-06	1.42731	4.44183e-06	1.42731	5.16113e-06	1.42731	5.82092e-06	1.42731	7.45544e-06
1.42975	4.01154e-06	1.42975	4.47723e-06	1.42975	5.20264e-06	1.42975	5.86334e-06	1.42975	7.51038e-06
1.43219	4.0451e-06	1.43219	4.51324e-06	1.43219	5.24445e-06	1.43219	5.9079e-06	1.43219	7.56836e-06
1.43463	4.07837e-06	1.43463	4.54956e-06	1.43463	5.28595e-06	1.43463	5.95306e-06	1.43463	7.62634e-06
1.43707	4.11285e-06	1.43707	4.58832e-06	1.43707	5.33051e-06	1.43707	5.99884e-06	1.43707	7.68433e-06
1.43951	4.14673e-06	1.43951	4.62494e-06	1.43951	5.37323e-06	1.43951	6.0437e-06	1.43951	7.74231e-06
1.44196	4.18213e-06	1.44196	4.66187e-06	1.44196	5.41748e-06	1.44196	6.09131e-06	1.44196	7.80334e-06
1.4444	4.216e-06	1.4444	4.70123e-06	1.4444	5.45959e-06	1.4444	6.13708e-06	1.4444	7.86133e-06
1.44684	4.25079e-06	1.44684	4.73785e-06	1.44684	5.50507e-06	1.44684	6.18591e-06	1.44684	7.92236e-06
1.44928	4.28528e-06	1.44928	4.77722e-06	1.44928	5.54932e-06	1.44928	6.23169e-06	1.44928	7.9834e-06
1.45172	4.32159e-06	1.45172	4.81567e-06	1.45172	5.59387e-06	1.45172	6.28052e-06	1.45172	8.04138e-06
1.45416	4.35913e-06	1.45416	4.85504e-06	1.45416	5.64056e-06	1.45416	6.32935e-06	1.45416	8.10547e-06
1.4566	4.39697e-06	1.4566	4.89563e-06	1.4566	5.68695e-06	1.4566	6.37817e-06	1.4566	8.16956e-06
1.45905	4.43054e-06	1.45905	4.93561e-06	1.45905	5.73273e-06	1.45905	6.427e-06	1.45905	8.22754e-06
1.46149	4.4696e-06	1.46149	4.97742e-06	1.46149	5.78003e-06	1.46149	6.47888e-06	1.46149	8.29163e-06
1.46393	4.50531e-06	1.46393	5.01678e-06	1.46393	5.82703e-06	1.46393	6.52466e-06	1.46393	8.35571e-06
1.46637	4.54437e-06	1.46637	5.05859e-06	1.46637	5.87494e-06	1.46637	6.57654e-06	1.46637	8.4198e-06
1.46881	4.58099e-06	1.46881	5.1001e-06	1.46881	5.92163e-06	1.46881	6.62537e-06	1.46881	8.48389e-06
1.47125	4.61945e-06	1.47125	5.14221e-06	1.47125	5.97015e-06	1.47125	6.67725e-06	1.47125	8.54797e-06
1.47369	4.65851e-06	1.47369	5.18494e-06	1.47369	6.0202e-06	1.47369	6.72913e-06	1.47369	8.61511e-06
1.47614	4.6991e-06	1.47614	5.22858e-06	1.47614	6.06995e-06	1.47614	6.78101e-06	1.47614	8.68225e-06
1.47858	4.73602e-06	1.47858	5.27008e-06	1.47858	6.11877e-06	1.47858	6.83289e-06	1.47858	8.74634e-06
1.48102	4.77753e-06	1.48102	5.31555e-06	1.48102	6.17065e-06	1.48102	6.88477e-06	1.48102	8.81653e-06
1.48346	4.81628e-06	1.48346	5.35767e-06	1.48346	6.21948e-06	1.48346	6.93665e-06	1.48346	8.88062e-06
1.4859	4.85687e-06	1.4859	5.40222e-06	1.4859	6.27136e-06	1.4859	6.99158e-06	1.4859	8.94775e-06
1.48834	4.89655e-06	1.48834	5.44708e-06	1.48834	6.32324e-06	1.48834	7.04346e-06	1.48834	9.01794e-06
1.49078	4.93744e-06	1.49078	5.49194e-06	1.49078	6.37512e-06	1.49078	7.09534e-06	1.49078	9.08508e-06
1.49323	4.97955e-06	1.49323	5.53802e-06	1.49323	6.427e-06	1.49323	7.15027e-06	1.49323	9.15527e-06
1.49567	5.02136e-06	1.49567	5.58319e-06	1.49567	6.47888e-06	1.49567	7.2052e-06	1.49567	9.22546e-06
1.49811	5.06226e-06	1.49811	5.62714e-06	1.49811	6.53076e-06	1.49811	7.26013e-06	1.49811	9.2926e-06
1.50055	5.10468e-06	1.50055	5.67627e-06	1.50055	6.58569e-06	1.50055	7.31812e-06	1.50055	9.36584e-06
