# Supplementary material for: In-depth chiral sensing capability of C-dots in a biomimetic protein-based hydrogel: a probe for chiral recognition applications
Source: Royal Society of Chemistry journal article supplement (doi:10.1039/d5bm01508a), 2026-01-01
Supplement: d5bm01508a1.zip [file Figure S12.xlsx]

## Sheet: Figure S13(a)
0.79188	3.16314e-06	0.77788	2.71255e-06	0.77788	2.70712e-06
0.80188	2.60162e-06	0.78788	2.14492e-06	0.78788	2.13949e-06
0.81188	2.28728e-06	0.79788	1.85196e-06	0.79788	1.84652e-06
0.82188	2.10723e-06	0.80788	1.67495e-06	0.80788	1.66952e-06
0.83188	1.94549e-06	0.81788	1.53762e-06	0.81788	1.53219e-06
0.84188	1.82159e-06	0.82788	1.42715e-06	0.82788	1.42172e-06
0.85188	1.70379e-06	0.83788	1.34597e-06	0.83788	1.34054e-06
0.86188	1.63055e-06	0.84788	1.28036e-06	0.84788	1.27493e-06
0.87188	1.54357e-06	0.85788	1.20498e-06	0.85788	1.19955e-06
0.88188	1.48406e-06	0.86788	1.165e-06	0.86788	1.15957e-06
0.89188	1.54082e-06	0.87788	1.24008e-06	0.87788	1.23464e-06
0.90188	1.50085e-06	0.88788	1.20895e-06	0.88788	1.20352e-06
0.91188	1.42913e-06	0.89788	1.15951e-06	0.89788	1.15408e-06
0.92188	1.39312e-06	0.90788	1.12869e-06	0.90788	1.12326e-06
0.93188	1.33147e-06	0.91788	1.08718e-06	0.91788	1.08175e-06
0.94188	1.29852e-06	0.92788	1.06155e-06	0.92788	1.05612e-06
0.95188	1.24236e-06	0.93788	1.02157e-06	0.93788	1.01614e-06
0.96188	1.21642e-06	0.94788	1.00387e-06	0.94788	9.98439e-07
0.97188	1.16302e-06	0.95788	9.65725e-07	0.95788	9.60292e-07
0.98188	1.14501e-06	0.96788	9.51076e-07	0.96788	9.45643e-07
0.99188	1.09466e-06	0.97788	9.19338e-07	0.97788	9.13905e-07
1.00188	1.0733e-06	0.98788	9.04384e-07	0.98788	8.98951e-07
1.01188	1.02752e-06	0.99788	8.73867e-07	0.99788	8.68434e-07
1.02188	1.01104e-06	1.00788	8.64101e-07	1.00788	8.58668e-07
1.03188	9.67705e-07	1.01788	8.31142e-07	1.01788	8.25709e-07
1.04188	9.53972e-07	1.02788	8.25649e-07	1.02788	8.20216e-07
1.05188	9.08806e-07	1.03788	7.93605e-07	1.03788	7.88173e-07
1.06188	8.99651e-07	1.04788	7.85671e-07	1.04788	7.80238e-07
1.07188	8.56316e-07	1.05788	7.58815e-07	1.05788	7.53383e-07
1.08188	8.49297e-07	1.06788	7.48134e-07	1.06788	7.42701e-07
1.09188	8.10844e-07	1.07788	7.27077e-07	1.07788	7.21644e-07
1.10188	8.0291e-07	1.08788	7.20974e-07	1.08788	7.15541e-07
1.11188	7.64152e-07	1.09788	6.94729e-07	1.09788	6.89296e-07
1.12188	7.58049e-07	1.10788	6.93813e-07	1.10788	6.8838e-07
1.13188	7.19292e-07	1.11788	6.69399e-07	1.11788	6.63966e-07
1.14188	7.13798e-07	1.12788	6.62075e-07	1.12788	6.56642e-07
1.15188	6.78703e-07	1.13788	6.41628e-07	1.13788	6.36195e-07
1.16188	6.75652e-07	1.14788	6.40407e-07	1.14788	6.34974e-07
1.17188	6.3903e-07	1.15788	6.1935e-07	1.15788	6.13917e-07
1.18188	6.36284e-07	1.16788	6.12026e-07	1.16788	6.06593e-07
1.19188	6.01189e-07	1.17788	5.91884e-07	1.17788	5.86451e-07
1.20188	5.96916e-07	1.18788	5.84865e-07	1.18788	5.79432e-07
1.21188	5.65788e-07	1.19788	5.67775e-07	1.19788	5.62342e-07
1.22188	5.64568e-07	1.20788	5.68386e-07	1.20788	5.62953e-07
1.23188	5.33745e-07	1.21788	5.48855e-07	1.21788	5.43422e-07
1.24188	5.28862e-07	1.22788	5.42751e-07	1.22788	5.37318e-07
1.25188	5.00175e-07	1.23788	5.26577e-07	1.23788	5.21144e-07
1.26188	4.98039e-07	1.24788	5.24135e-07	1.24788	5.18702e-07
1.27188	4.65385e-07	1.25788	5.08266e-07	1.25788	5.02833e-07
1.28188	4.66606e-07	1.26788	5.0613e-07	1.26788	5.00697e-07
1.29188	4.36699e-07	1.27788	4.88125e-07	1.27788	4.82692e-07
1.30188	4.40666e-07	1.28788	4.87209e-07	1.28788	4.81776e-07
1.31188	4.10454e-07	1.29788	4.70424e-07	1.29788	4.64991e-07
1.32188	4.1198e-07	1.30788	4.7134e-07	1.30788	4.65907e-07
1.33188	3.82683e-07	1.31788	4.55776e-07	1.31788	4.50343e-07
1.34188	3.84209e-07	1.32788	4.5486e-07	1.32788	4.49427e-07
1.35188	3.54301e-07	1.33788	4.40212e-07	1.33788	4.34779e-07
1.36188	3.56132e-07	1.34788	4.35024e-07	1.34788	4.29591e-07
1.37188	3.28667e-07	1.35788	4.23122e-07	1.35788	4.17689e-07
1.38188	3.31108e-07	1.36788	4.2007e-07	1.36788	4.14637e-07
1.39188	3.03642e-07	1.37788	4.04201e-07	1.37788	3.98768e-07
1.40188	3.06999e-07	1.38788	4.06032e-07	1.38788	4.00599e-07
1.41188	2.78618e-07	1.39788	3.88027e-07	1.39788	3.82594e-07
1.42188	2.85942e-07	1.40788	3.90468e-07	1.40788	3.85035e-07
1.43188	2.59087e-07	1.41788	3.76125e-07	1.41788	3.70692e-07
1.44188	2.62443e-07	1.42788	3.73378e-07	1.42788	3.67945e-07
1.45188	2.36504e-07	1.43788	3.64528e-07	1.43788	3.59095e-07
1.46188	2.42302e-07	1.44788	3.64834e-07	1.44788	3.59401e-07
1.47188	2.15752e-07	1.45788	3.47744e-07	1.45788	3.42311e-07
1.48188	2.20634e-07	1.46788	3.48354e-07	1.46788	3.42921e-07
1.49188	1.92863e-07	1.47788	3.33095e-07	1.47788	3.27662e-07
1.50188	2.00798e-07	1.48788	3.37368e-07	1.48788	3.31935e-07
1.51188	1.74858e-07	1.49788	3.22719e-07	1.49788	3.17286e-07
1.52188	1.80656e-07	1.50788	3.2394e-07	1.50788	3.18507e-07
1.53188	1.54716e-07	1.51788	3.0685e-07	1.51788	3.01417e-07
1.54188	1.61735e-07	1.52788	3.09597e-07	1.52788	3.04164e-07
1.55188	1.3549e-07	1.53788	2.94948e-07	1.53788	2.89515e-07
1.56188	1.45561e-07	1.54788	2.9861e-07	1.54788	2.93177e-07
1.57188	1.19011e-07	1.55788	2.82131e-07	1.55788	2.76698e-07
1.58188	1.24504e-07	1.56788	2.86403e-07	1.56788	2.8097e-07
1.59188	9.88693e-08	1.57788	2.74807e-07	1.57788	2.69374e-07
1.60188	1.09856e-07	1.58788	2.7267e-07	1.58788	2.67237e-07
1.61188	8.20846e-08	1.59788	2.61074e-07	1.59788	2.55641e-07
1.62188	9.18502e-08	1.60788	2.6382e-07	1.60788	2.58387e-07
1.63188	6.62155e-08	1.61788	2.51613e-07	1.61788	2.4618e-07
1.64188	7.38449e-08	1.62788	2.52529e-07	1.62788	2.47096e-07
1.65188	5.12619e-08	1.63788	2.40932e-07	1.63788	2.35499e-07
1.66188	5.73654e-08	1.64788	2.40627e-07	1.64788	2.35194e-07
1.67188	3.47824e-08	1.65788	2.29641e-07	1.65788	2.24208e-07
1.68188	4.48532e-08	1.66788	2.30556e-07	1.66788	2.25123e-07
1.69188	1.92184e-08	1.67788	2.18654e-07	1.67788	2.13221e-07
1.70188	3.02047e-08	1.68788	2.21401e-07	1.68788	2.15968e-07
1.71188	5.18031e-09	1.69788	2.08889e-07	1.69788	2.03456e-07
1.72188	1.64718e-08	1.70788	2.13466e-07	1.70788	2.08033e-07
1.73188	-7.94225e-09	1.71788	1.99123e-07	1.71788	1.9369e-07
1.74188	1.5182e-09	1.72788	2.04006e-07	1.72788	1.98573e-07
1.75188	-2.25907e-08	1.73788	1.90883e-07	1.73788	1.8545e-07
1.76188	-1.16044e-08	1.74788	1.90883e-07	1.74788	1.8545e-07
1.77188	-3.69339e-08	1.75788	1.80507e-07	1.75788	1.75074e-07
1.78188	-2.47269e-08	1.76788	1.83254e-07	1.76788	1.77821e-07
1.79188	-4.79203e-08	1.77788	1.75014e-07	1.77788	1.69581e-07
1.80188	-3.81546e-08	1.78788	1.76235e-07	1.78788	1.70802e-07
1.81188	-6.34842e-08	1.79788	1.63112e-07	1.79788	1.57679e-07
1.82188	-5.18876e-08	1.80788	1.63723e-07	1.80788	1.5829e-07
1.83188	-7.53861e-08	1.81788	1.52736e-07	1.81788	1.47303e-07
1.84188	-6.04325e-08	1.82788	1.57924e-07	1.82788	1.52491e-07
1.85188	-8.42362e-08	1.83788	1.46022e-07	1.83788	1.4059e-07
1.86188	-7.63016e-08	1.84788	1.48159e-07	1.84788	1.42726e-07
1.87188	-9.27811e-08	1.85788	1.40529e-07	1.85788	1.35096e-07
1.88188	-8.54569e-08	1.86788	1.39614e-07	1.86788	1.34181e-07
1.89188	-1.07735e-07	1.87788	1.29543e-07	1.87788	1.2411e-07
1.90188	-9.70536e-08	1.88788	1.34426e-07	1.88788	1.28993e-07
1.91188	-1.22078e-07	1.89788	1.21303e-07	1.89788	1.1587e-07
1.92188	-1.0865e-07	1.90788	1.25271e-07	1.90788	1.19838e-07
1.93188	-1.31233e-07	1.91788	1.17031e-07	1.91788	1.11598e-07
1.94188	-1.17195e-07	1.92788	1.13979e-07	1.92788	1.08546e-07
1.95188	-1.39778e-07	1.93788	1.07265e-07	1.93788	1.01832e-07
1.96188	-1.26656e-07	1.94788	1.13369e-07	1.94788	1.07936e-07
1.97188	-1.49544e-07	1.95788	9.62788e-08	1.95788	9.08459e-08
1.98188	-1.37337e-07	1.96788	1.02993e-07	1.96788	9.75597e-08
1.99188	-1.6053e-07	1.97788	9.20064e-08	1.97788	8.65734e-08
2.00188	-1.48933e-07	1.98788	9.56685e-08	1.98788	9.02355e-08
2.01188	-1.6877e-07	1.99788	8.92598e-08	1.99788	8.38268e-08
2.02188	-1.55342e-07	2.00788	8.98701e-08	2.00788	8.44372e-08
2.03188	-1.7701e-07	2.01788	7.97993e-08	2.01788	7.43664e-08
2.04188	-1.67854e-07	2.02788	8.37666e-08	2.02788	7.83337e-08
2.05188	-1.88606e-07	2.03788	6.97285e-08	2.03788	6.42956e-08
2.06188	-1.76704e-07	2.04788	7.73579e-08	2.04788	7.1925e-08
2.07188	-1.94405e-07	2.05788	6.78975e-08	2.05788	6.24645e-08
2.08188	-1.84639e-07	2.06788	6.97285e-08	2.06788	6.42956e-08
2.09188	-2.0417e-07	2.07788	5.87422e-08	2.07788	5.33093e-08
2.10188	-1.91048e-07	2.08788	6.08784e-08	2.08788	5.54455e-08
2.11188	-2.1241e-07	2.09788	5.56904e-08	2.09788	5.02575e-08
2.12188	-2.00813e-07	2.10788	5.50801e-08	2.10788	4.96472e-08
2.13188	-2.20955e-07	2.11788	4.95869e-08	2.11788	4.4154e-08
2.14188	-2.07832e-07	2.12788	5.01973e-08	2.12788	4.47643e-08
2.15188	-2.2889e-07	2.13788	4.07368e-08	2.13788	3.53039e-08
2.16188	-2.13326e-07	2.14788	4.19575e-08	2.14788	3.65246e-08
2.17188	-2.34993e-07	2.15788	3.46333e-08	2.15788	2.92004e-08
2.18188	-2.25227e-07	2.16788	3.79902e-08	2.16788	3.25573e-08
2.19188	-2.43233e-07	2.17788	3.15816e-08	2.17788	2.61486e-08
2.20188	-2.31331e-07	2.18788	3.28023e-08	2.18788	2.73693e-08
2.21188	-2.52998e-07	2.19788	2.5478e-08	2.19788	2.00451e-08
2.22188	-2.3835e-07	2.20788	2.73091e-08	2.20788	2.18762e-08
2.23188	-2.57576e-07	2.21788	1.66279e-08	2.21788	1.1195e-08
2.24188	-2.45064e-07	2.22788	2.18159e-08	2.22788	1.6383e-08
2.25188	-2.66121e-07	2.23788	1.29658e-08	2.23788	7.53289e-09
2.26188	-2.51778e-07	2.24788	1.29658e-08	2.24788	7.53289e-09
2.27188	-2.73445e-07	2.25788	7.16749e-09	2.25788	1.73455e-09
2.28188	-2.59712e-07	2.26788	1.26607e-08	2.26788	7.22772e-09
2.29188	-2.79854e-07	2.27788	1.9795e-09	2.27788	-3.45343e-09
2.30188	-2.6429e-07	2.28788	6.55714e-09	2.28788	1.1242e-09
2.31188	-2.86873e-07	2.29788	-2.29296e-09	2.29788	-7.7259e-09
2.32188	-2.73445e-07	2.30788	4.53624e-10	2.30788	-4.97931e-09
2.33188	-2.89619e-07	2.31788	-7.17577e-09	2.31788	-1.26087e-08
2.34188	-2.8138e-07	2.32788	-2.90331e-09	2.32788	-8.33625e-09
2.35188	-2.9969e-07	2.33788	-1.38896e-08	2.33788	-1.93226e-08
2.36188	-2.87483e-07	2.34788	-1.02275e-08	2.34788	-1.56605e-08
2.37188	-3.05489e-07	2.35788	-1.45e-08	2.35788	-1.99329e-08
2.38188	-2.89619e-07	2.36788	-1.41948e-08	2.36788	-1.96278e-08
2.39188	-3.11592e-07	2.37788	-2.24346e-08	2.37788	-2.78675e-08
2.40188	-2.95723e-07	2.38788	-1.9688e-08	2.38788	-2.51209e-08
2.41188	-3.15254e-07	2.39788	-2.88433e-08	2.39788	-3.42762e-08
2.42188	-3.00911e-07	2.40788	-2.60967e-08	2.40788	-3.15296e-08
2.43188	-3.25325e-07	2.41788	-3.06743e-08	2.41788	-3.61072e-08
2.44188	-3.07625e-07	2.42788	-3.28105e-08	2.42788	-3.82435e-08
2.45188	-3.26851e-07	2.43788	-3.95244e-08	2.43788	-4.49573e-08
2.46188	-3.13728e-07	2.44788	-3.89141e-08	2.44788	-4.4347e-08
2.47188	-3.3448e-07	2.45788	-4.10503e-08	2.45788	-4.64832e-08
2.48188	-3.18001e-07	2.46788	-4.07451e-08	2.46788	-4.6178e-08
2.49188	-3.39668e-07	2.47788	-4.83745e-08	2.47788	-5.38074e-08
2.50188	-3.23494e-07	2.48788	-4.929e-08	2.48788	-5.4723e-08
2.51188	-3.45467e-07	2.49788	-5.35625e-08	2.49788	-5.89954e-08
2.52188	-3.26241e-07	2.50788	-5.32573e-08	2.50788	-5.86903e-08
2.53188	-3.48213e-07	2.51788	-5.81401e-08	2.51788	-6.35731e-08
2.54188	-3.36311e-07	2.52788	-5.72246e-08	2.52788	-6.26575e-08
2.55188	-3.55232e-07	2.53788	-6.02764e-08	2.53788	-6.57093e-08
2.56188	-3.39973e-07	2.54788	-6.18022e-08	2.54788	-6.72352e-08
2.57188	-3.60725e-07	2.55788	-6.69902e-08	2.55788	-7.24232e-08
2.58188	-3.4211e-07	2.56788	-6.63799e-08	2.56788	-7.18128e-08
2.59188	-3.62862e-07	2.57788	-7.09575e-08	2.57788	-7.63904e-08
2.60188	-3.48213e-07	2.58788	-6.94316e-08	2.58788	-7.48646e-08
2.61188	-3.68965e-07	2.59788	-7.7061e-08	2.59788	-8.2494e-08
2.62188	-3.53706e-07	2.60788	-7.61455e-08	2.60788	-8.15784e-08
2.63188	-3.74458e-07	2.61788	-7.88921e-08	2.61788	-8.4325e-08
2.64188	-3.56758e-07	2.62788	-8.0418e-08	2.62788	-8.58509e-08
2.65188	-3.79646e-07	2.63788	-8.65215e-08	2.63788	-9.19544e-08
2.66188	-3.61946e-07	2.64788	-8.19438e-08	2.64788	-8.73768e-08
2.67188	-3.82088e-07	2.65788	-8.7437e-08	2.65788	-9.28699e-08
2.68188	-3.66524e-07	2.66788	-8.65215e-08	2.66788	-9.19544e-08
2.69188	-3.83919e-07	2.67788	-9.07939e-08	2.67788	-9.62269e-08
2.70188	-3.70796e-07	2.68788	-9.29302e-08	2.68788	-9.83631e-08
2.71188	-3.90633e-07	2.69788	-9.59819e-08	2.69788	-1.01415e-07
2.72188	-3.73238e-07	2.70788	-9.38457e-08	2.70788	-9.92786e-08
2.73188	-3.97652e-07	2.71788	-9.84233e-08	2.71788	-1.03856e-07
2.74188	-3.79646e-07	2.72788	-9.84233e-08	2.72788	-1.03856e-07
2.75188	-3.99178e-07	2.73788	-1.05137e-07	2.73788	-1.1057e-07
2.76188	-3.82698e-07	2.74788	-1.03001e-07	2.74788	-1.08434e-07
2.77188	-4.01314e-07	2.75788	-1.05748e-07	2.75788	-1.1118e-07
2.78188	-3.8636e-07	2.76788	-1.09715e-07	2.76788	-1.15148e-07
2.79188	-4.05891e-07	2.77788	-1.11546e-07	2.77788	-1.16979e-07
2.80188	-3.89717e-07	2.78788	-1.11546e-07	2.78788	-1.16979e-07
2.81188	-4.08638e-07	2.79788	-1.17649e-07	2.79788	-1.23082e-07
2.82188	-3.946e-07	2.80788	-1.16124e-07	2.80788	-1.21556e-07
2.83188	-4.13826e-07	2.81788	-1.1887e-07	2.81788	-1.24303e-07
2.84188	-3.95515e-07	2.82788	-1.16429e-07	2.82788	-1.21862e-07
2.85188	-4.16267e-07	2.83788	-1.22837e-07	2.83788	-1.2827e-07
2.86188	-4.00093e-07	2.84788	-1.21922e-07	2.84788	-1.27355e-07
2.87188	-4.21455e-07	2.85788	-1.25279e-07	2.85788	-1.30712e-07
2.88188	-4.06807e-07	2.86788	-1.21922e-07	2.86788	-1.27355e-07
2.89188	-4.26643e-07	2.87788	-1.31077e-07	2.87788	-1.3651e-07
2.90188	-4.05281e-07	2.88788	-1.28636e-07	2.88788	-1.34069e-07
2.91188	-4.26643e-07	2.89788	-1.34434e-07	2.89788	-1.39867e-07
2.92188	-4.1169e-07	2.90788	-1.29551e-07	2.90788	-1.34984e-07
2.93188	-4.31221e-07	2.91788	-1.38401e-07	2.91788	-1.43834e-07
2.94188	-4.14436e-07	2.92788	-1.37181e-07	2.92788	-1.42614e-07
2.95188	-4.31221e-07	2.93788	-1.40232e-07	2.93788	-1.45665e-07
2.96188	-4.13826e-07	2.94788	-1.40232e-07	2.94788	-1.45665e-07
2.97188	-4.39156e-07	2.95788	-1.43589e-07	2.95788	-1.49022e-07
2.98188	-4.18404e-07	2.96788	-1.4481e-07	2.96788	-1.50243e-07
2.99188	-4.39461e-07	2.97788	-1.48777e-07	2.97788	-1.5421e-07
3.00188	-4.20235e-07	2.98788	-1.45115e-07	2.98788	-1.50548e-07
3.01188	-4.45869e-07	2.99788	-1.52134e-07	2.99788	-1.57567e-07
3.02188	-4.27254e-07	3.00788	-1.49388e-07	3.00788	-1.54821e-07
3.03188	-4.46175e-07	3.01788	-1.55796e-07	3.01788	-1.61229e-07
3.04188	-4.29085e-07	3.02788	-1.5366e-07	3.02788	-1.59093e-07
3.05188	-4.49837e-07	3.03788	-1.56712e-07	3.03788	-1.62145e-07
3.06188	-4.30306e-07	3.04788	-1.56102e-07	3.04788	-1.61534e-07
3.07188	-4.55025e-07	3.05788	-1.58238e-07	3.05788	-1.63671e-07
3.08188	-4.34273e-07	3.06788	-1.59458e-07	3.06788	-1.64891e-07
3.09188	-4.54414e-07	3.07788	-1.6129e-07	3.07788	-1.66722e-07
3.10188	-4.3763e-07	3.08788	-1.61595e-07	3.08788	-1.67028e-07
3.11188	-4.55025e-07	3.09788	-1.64952e-07	3.09788	-1.70385e-07
3.12188	-4.40376e-07	3.10788	-1.66172e-07	3.10788	-1.71605e-07
3.13188	-4.61739e-07	3.11788	-1.65867e-07	3.11788	-1.713e-07
3.14188	-4.45259e-07	3.12788	-1.7014e-07	3.12788	-1.75573e-07
3.15188	-4.63875e-07	3.13788	-1.69224e-07	3.13788	-1.74657e-07
3.16188	-4.4648e-07	3.14788	-1.70445e-07	3.14788	-1.75878e-07
3.17188	-4.65401e-07	3.15788	-1.73802e-07	3.15788	-1.79235e-07
3.18188	-4.48921e-07	3.16788	-1.74717e-07	3.16788	-1.8015e-07
3.19188	-4.66927e-07	3.17788	-1.75328e-07	3.17788	-1.80761e-07
3.20188	-4.49837e-07	3.18788	-1.78685e-07	3.18788	-1.84117e-07
3.21188	-4.70589e-07	3.19788	-1.83567e-07	3.19788	-1.89e-07
3.22188	-4.52889e-07	3.20788	-1.79295e-07	3.20788	-1.84728e-07
3.23188	-4.73946e-07	3.21788	-1.82347e-07	3.21788	-1.8778e-07
3.24188	-4.5533e-07	3.22788	-1.83567e-07	3.22788	-1.89e-07
3.25188	-4.77608e-07	3.23788	-1.8845e-07	3.23788	-1.93883e-07
3.26188	-4.56856e-07	3.24788	-1.83567e-07	3.24788	-1.89e-07
3.27188	-4.80965e-07	3.25788	-1.89976e-07	3.25788	-1.95409e-07
3.28188	-4.61128e-07	3.26788	-1.87535e-07	3.26788	-1.92968e-07
3.29188	-4.82491e-07	3.27788	-1.91197e-07	3.27788	-1.9663e-07
3.30188	-4.62044e-07	3.28788	-1.94554e-07	3.28788	-1.99987e-07
3.31188	-4.85237e-07	3.29788	-1.93028e-07	3.29788	-1.98461e-07
3.32188	-4.66316e-07	3.30788	-1.95469e-07	3.30788	-2.00902e-07
3.33188	-4.88289e-07	3.31788	-1.96995e-07	3.31788	-2.02428e-07
3.34188	-4.69673e-07	3.32788	-1.96385e-07	3.32788	-2.01818e-07
3.35188	-4.87679e-07	3.33788	-1.99742e-07	3.33788	-2.05175e-07
3.36188	-4.70894e-07	3.34788	-2.01268e-07	3.34788	-2.06701e-07
3.37188	-4.9012e-07	3.35788	-2.01268e-07	3.35788	-2.06701e-07
3.38188	-4.68147e-07	3.36788	-2.01573e-07	3.36788	-2.07006e-07
3.39188	-4.95003e-07	3.37788	-2.04625e-07	3.37788	-2.10057e-07
3.40188	-4.7303e-07	3.38788	-2.0493e-07	3.38788	-2.10363e-07
3.41188	-4.96529e-07	3.39788	-2.05235e-07	3.39788	-2.10668e-07
3.42188	-4.76692e-07	3.40788	-2.06456e-07	3.40788	-2.11888e-07
3.43188	-5.00496e-07	3.41788	-2.07066e-07	3.41788	-2.12499e-07
3.44188	-4.8066e-07	3.42788	-2.06761e-07	3.42788	-2.12194e-07
3.45188	-5.01411e-07	3.43788	-2.08897e-07	3.43788	-2.1433e-07
3.46188	-4.83101e-07	3.44788	-2.12559e-07	3.44788	-2.17992e-07
3.47188	-5.03243e-07	3.45788	-2.14695e-07	3.45788	-2.20128e-07
3.48188	-4.85237e-07	3.46788	-2.12559e-07	3.46788	-2.17992e-07
3.49188	-5.04768e-07	3.47788	-2.13169e-07	3.47788	-2.18602e-07
3.50188	-4.84016e-07	3.48788	-2.18663e-07	3.48788	-2.24096e-07
3.51188	-5.0721e-07	3.49788	-2.19273e-07	3.49788	-2.24706e-07
3.52188	-4.88899e-07	3.50788	-2.19883e-07	3.50788	-2.25316e-07
3.53188	-5.10262e-07	3.51788	-2.18968e-07	3.51788	-2.24401e-07
3.54188	-4.88594e-07	3.52788	-2.18968e-07	3.52788	-2.24401e-07
3.55188	-5.13008e-07	3.53788	-2.2324e-07	3.53788	-2.28673e-07
3.56188	-4.93172e-07	3.54788	-2.20494e-07	3.54788	-2.25927e-07
3.57188	-5.1545e-07	3.55788	-2.22935e-07	3.55788	-2.28368e-07
3.58188	-4.95613e-07	3.56788	-2.25071e-07	3.56788	-2.30504e-07
3.59188	-5.19417e-07	3.57788	-2.27208e-07	3.57788	-2.3264e-07
3.60188	-4.9836e-07	3.58788	-2.27513e-07	3.58788	-2.32946e-07
3.61188	-5.17586e-07	3.59788	-2.28428e-07	3.59788	-2.33861e-07
3.62188	-4.9958e-07	3.60788	-2.28733e-07	3.60788	-2.34166e-07
3.63188	-5.21858e-07	3.61788	-2.29954e-07	3.61788	-2.35387e-07
3.64188	-5.01717e-07	3.62788	-2.3209e-07	3.62788	-2.37523e-07
3.65188	-5.20638e-07	3.63788	-2.32395e-07	3.63788	-2.37828e-07
3.66188	-5.03548e-07	3.64788	-2.31175e-07	3.64788	-2.36608e-07
3.67188	-5.23994e-07	3.65788	-2.35752e-07	3.65788	-2.41185e-07
3.68188	-5.07515e-07	3.66788	-2.34837e-07	3.66788	-2.4027e-07
3.69188	-5.26741e-07	3.67788	-2.38499e-07	3.67788	-2.43932e-07
3.70188	-5.06905e-07	3.68788	-2.37889e-07	3.68788	-2.43322e-07
3.71188	-5.27046e-07	3.69788	-2.36363e-07	3.69788	-2.41796e-07
3.72188	-5.11177e-07	3.70788	-2.38804e-07	3.70788	-2.44237e-07
3.73188	-5.29793e-07	3.71788	-2.40025e-07	3.71788	-2.45458e-07
3.74188	-5.10872e-07	3.72788	-2.41551e-07	3.72788	-2.46984e-07
3.75188	-5.32234e-07	3.73788	-2.42466e-07	3.73788	-2.47899e-07
3.76188	-5.13313e-07	3.74788	-2.42771e-07	3.74788	-2.48204e-07
3.77188	-5.32845e-07	3.75788	-2.47044e-07	3.75788	-2.52477e-07
3.78188	-5.1545e-07	3.76788	-2.43687e-07	3.76788	-2.4912e-07
3.79188	-5.35286e-07	3.77788	-2.47044e-07	3.77788	-2.52477e-07
3.80188	-5.18196e-07	3.78788	-2.47959e-07	3.78788	-2.53392e-07
3.81188	-5.36812e-07	3.79788	-2.47349e-07	3.79788	-2.52782e-07
3.82188	-5.22469e-07	3.80788	-2.50096e-07	3.80788	-2.55529e-07
3.83188	-5.36812e-07	3.81788	-2.48265e-07	3.81788	-2.53698e-07
3.84188	-5.18501e-07	3.82788	-2.53147e-07	3.82788	-2.5858e-07
3.85188	-5.42915e-07	3.83788	-2.52842e-07	3.83788	-2.58275e-07
3.86188	-5.21248e-07	3.84788	-2.54979e-07	3.84788	-2.60411e-07
3.87188	-5.44441e-07	3.85788	-2.51927e-07	3.85788	-2.5736e-07
3.88188	-5.22774e-07	3.86788	-2.53758e-07	3.86788	-2.59191e-07
3.89188	-5.42915e-07	3.87788	-2.54673e-07	3.87788	-2.60106e-07
3.90188	-5.2552e-07	3.88788	-2.5681e-07	3.88788	-2.62242e-07
3.91188	-5.45357e-07	3.89788	-2.5803e-07	3.89788	-2.63463e-07
3.92188	-5.2552e-07	3.90788	-2.59556e-07	3.90788	-2.64989e-07
3.93188	-5.48103e-07	3.91788	-2.56504e-07	3.91788	-2.61937e-07
3.94188	-5.27046e-07	3.92788	-2.61082e-07	3.92788	-2.66515e-07
3.95188	-5.49934e-07	3.93788	-2.58946e-07	3.93788	-2.64379e-07
3.96188	-5.29488e-07	3.94788	-2.63829e-07	3.94788	-2.69262e-07
3.97188	-5.51155e-07	3.95788	-2.62303e-07	3.95788	-2.67736e-07
3.98188	-5.28877e-07	3.96788	-2.65049e-07	3.96788	-2.70482e-07
3.99188	-5.52376e-07	3.97788	-2.64439e-07	3.97788	-2.69872e-07
4.00188	-5.35286e-07	3.98788	-2.6627e-07	3.98788	-2.71703e-07
4.01188	-5.52986e-07	3.99788	-2.61998e-07	3.99788	-2.6743e-07
4.02188	-5.34676e-07	4.00788	-2.67186e-07	4.00788	-2.72618e-07
4.03188	-5.53291e-07	4.01788	-2.67796e-07	4.01788	-2.73229e-07
4.04188	-5.37117e-07	4.02788	-2.66575e-07	4.02788	-2.72008e-07
4.05188	-5.56648e-07	4.03788	-2.6627e-07	4.03788	-2.71703e-07
4.06188	-5.38643e-07	4.04788	-2.72374e-07	4.04788	-2.77806e-07
4.07188	-5.57259e-07	4.05788	-2.67491e-07	4.05788	-2.72924e-07
4.08188	-5.38948e-07	4.06788	-2.71458e-07	4.06788	-2.76891e-07
4.09188	-5.58785e-07	4.07788	-2.72068e-07	4.07788	-2.77501e-07
4.10188	-5.4139e-07	4.08788	-2.71458e-07	4.08788	-2.76891e-07
4.11188	-5.5909e-07	4.09788	-2.72679e-07	4.09788	-2.78112e-07
4.12188	-5.42915e-07	4.10788	-2.73899e-07	4.10788	-2.79332e-07
4.13188	-5.60921e-07	4.11788	-2.76951e-07	4.11788	-2.82384e-07
4.14188	-5.44441e-07	4.12788	-2.76341e-07	4.12788	-2.81774e-07
4.15188	-5.63057e-07	4.13788	-2.77562e-07	4.13788	-2.82994e-07
4.16188	-5.45662e-07	4.14788	-2.77562e-07	4.14788	-2.82994e-07
4.17188	-5.6794e-07	4.15788	-2.77867e-07	4.15788	-2.833e-07
4.18188	-5.44746e-07	4.16788	-2.80003e-07	4.16788	-2.85436e-07
4.19188	-5.66414e-07	4.17788	-2.77867e-07	4.17788	-2.833e-07
4.20188	-5.47493e-07	4.18788	-2.80308e-07	4.18788	-2.85741e-07
4.21188	-5.69161e-07	4.19788	-2.79393e-07	4.19788	-2.84826e-07
4.22188	-5.49934e-07	4.20788	-2.81224e-07	4.20788	-2.86657e-07
4.23188	-5.70686e-07	4.21788	-2.82444e-07	4.21788	-2.87877e-07
4.24188	-5.49934e-07	4.22788	-2.8275e-07	4.22788	-2.88182e-07
4.25188	-5.71907e-07	4.23788	-2.85801e-07	4.23788	-2.91234e-07
4.26188	-5.5085e-07	4.24788	-2.86106e-07	4.24788	-2.91539e-07
4.27188	-5.72517e-07	4.25788	-2.83665e-07	4.25788	-2.89098e-07
4.28188	-5.52071e-07	4.26788	-2.84886e-07	4.26788	-2.90319e-07
4.29188	-5.71297e-07	4.27788	-2.86717e-07	4.27788	-2.9215e-07
4.30188	-5.54817e-07	4.28788	-2.87327e-07	4.28788	-2.9276e-07
4.31188	-5.74654e-07	4.29788	-2.89769e-07	4.29788	-2.95201e-07
4.32188	-5.56343e-07	4.30788	-2.88548e-07	4.30788	-2.93981e-07
4.33188	-5.75874e-07	4.31788	-2.90684e-07	4.31788	-2.96117e-07
4.34188	-5.56343e-07	4.32788	-2.93431e-07	4.32788	-2.98864e-07
4.35188	-5.76485e-07	4.33788	-2.88243e-07	4.33788	-2.93676e-07
4.36188	-5.58479e-07	4.34788	-2.9221e-07	4.34788	-2.97643e-07
4.37188	-5.78621e-07	4.35788	-2.94651e-07	4.35788	-3.00084e-07
4.38188	-5.57869e-07	4.36788	-2.94957e-07	4.36788	-3.00389e-07
4.39188	-5.79536e-07	4.37788	-2.91905e-07	4.37788	-2.97338e-07
4.40188	-5.60005e-07	4.38788	-2.95872e-07	4.38788	-3.01305e-07
4.41188	-5.81062e-07	4.39788	-2.9221e-07	4.39788	-2.97643e-07
4.42188	-5.63362e-07	4.40788	-2.96788e-07	4.40788	-3.02221e-07
4.43188	-5.81368e-07	4.41788	-2.95262e-07	4.41788	-3.00695e-07
4.44188	-5.65804e-07	4.42788	-2.98619e-07	4.42788	-3.04052e-07
4.45188	-5.84114e-07	4.43788	-2.98313e-07	4.43788	-3.03746e-07
4.46188	-5.64278e-07	4.44788	-2.98008e-07	4.44788	-3.03441e-07
4.47188	-5.80757e-07	4.45788	-3.00145e-07	4.45788	-3.05577e-07
4.48188	-5.64583e-07	4.46788	-3.00755e-07	4.46788	-3.06188e-07
4.49188	-5.8625e-07	4.47788	-3.0167e-07	4.47788	-3.07103e-07
4.50188	-5.65804e-07	4.48788	-3.03196e-07	4.48788	-3.08629e-07
4.51188	-5.88387e-07	4.49788	-3.0167e-07	4.49788	-3.07103e-07
4.52188	-5.68855e-07	4.50788	-3.06858e-07	4.50788	-3.12291e-07
4.53188	-5.86556e-07	4.51788	-3.03196e-07	4.51788	-3.08629e-07
4.54188	-5.65804e-07	4.52788	-3.08689e-07	4.52788	-3.14122e-07
4.55188	-5.89302e-07	4.53788	-3.02586e-07	4.53788	-3.08019e-07
4.56188	-5.70076e-07	4.54788	-3.04417e-07	4.54788	-3.0985e-07
4.57188	-5.89607e-07	4.55788	-3.04722e-07	4.55788	-3.10155e-07
4.58188	-5.74959e-07	4.56788	-3.05943e-07	4.56788	-3.11376e-07
4.59188	-5.92659e-07	4.57788	-3.03501e-07	4.57788	-3.08934e-07
4.60188	-5.69161e-07	4.58788	-3.10826e-07	4.58788	-3.16259e-07
4.61188	-5.92659e-07	4.59788	-3.05943e-07	4.59788	-3.11376e-07
4.62188	-5.74654e-07	4.60788	-3.0991e-07	4.60788	-3.15343e-07
4.63188	-5.90523e-07	4.61788	-3.08384e-07	4.61788	-3.13817e-07
4.64188	-5.73738e-07	4.62788	-3.1052e-07	4.62788	-3.15953e-07
4.65188	-5.9449e-07	4.63788	-3.08384e-07	4.63788	-3.13817e-07
4.66188	-5.74654e-07	4.64788	-3.13572e-07	4.64788	-3.19005e-07
4.67188	-5.951e-07	4.65788	-3.1052e-07	4.65788	-3.15953e-07
4.68188	-5.75874e-07	4.66788	-3.15403e-07	4.66788	-3.20836e-07
4.69188	-5.98763e-07	4.67788	-3.1052e-07	4.67788	-3.15953e-07
4.70188	-5.75264e-07	4.68788	-3.1815e-07	4.68788	-3.23583e-07
4.71188	-5.98763e-07	4.69788	-3.14183e-07	4.69788	-3.19616e-07
4.72188	-5.78316e-07	4.70788	-3.16929e-07	4.70788	-3.22362e-07
4.73188	-5.98763e-07	4.71788	-3.15708e-07	4.71788	-3.21141e-07
4.74188	-5.77705e-07	4.72788	-3.21507e-07	4.72788	-3.2694e-07
4.75188	-5.99678e-07	4.73788	-3.16929e-07	4.73788	-3.22362e-07
4.76188	-5.78316e-07	4.74788	-3.20286e-07	4.74788	-3.25719e-07
4.77188	-5.99068e-07	4.75788	-3.19676e-07	4.75788	-3.25109e-07
4.78188	-5.82283e-07	4.76788	-3.24253e-07	4.76788	-3.29686e-07
4.79188	-6.02119e-07	4.77788	-3.14793e-07	4.77788	-3.20226e-07
4.80188	-5.81673e-07	4.78788	-3.20591e-07	4.78788	-3.26024e-07
4.81188	-6.00594e-07	4.79788	-3.1876e-07	4.79788	-3.24193e-07
4.82188	-5.82283e-07	4.80788	-3.2639e-07	4.80788	-3.31823e-07
4.83188	-6.02425e-07	4.81788	-3.22422e-07	4.81788	-3.27855e-07
4.84188	-5.85335e-07	4.82788	-3.27e-07	4.82788	-3.32433e-07
4.85188	-6.03951e-07	4.83788	-3.24253e-07	4.83788	-3.29686e-07
4.86188	-5.81978e-07	4.84788	-3.29441e-07	4.84788	-3.34874e-07
4.87188	-6.04561e-07	4.85788	-3.26695e-07	4.85788	-3.32128e-07
4.88188	-5.85335e-07	4.86788	-3.33104e-07	4.86788	-3.38536e-07
4.89188	-6.06697e-07	4.87788	-3.28221e-07	4.87788	-3.33654e-07
4.90188	-5.84419e-07	4.88788	-3.33409e-07	4.88788	-3.38842e-07
4.91188	-6.04256e-07	4.89788	-3.30357e-07	4.89788	-3.3579e-07
4.92188	-5.88081e-07	4.90788	-3.37376e-07	4.90788	-3.42809e-07
4.93188	-6.06392e-07	4.91788	-3.32188e-07	4.91788	-3.37621e-07
4.94188	-5.8625e-07	4.92788	-3.3646e-07	4.92788	-3.41893e-07
4.95188	-6.04561e-07	4.93788	-3.3585e-07	4.93788	-3.41283e-07
4.96188	-5.8625e-07	4.94788	-3.40428e-07	4.94788	-3.45861e-07
4.97188	-6.07918e-07	4.95788	-3.33104e-07	4.95788	-3.38536e-07
4.98188	-5.87166e-07	4.96788	-3.39817e-07	4.96788	-3.4525e-07
4.99188	-6.07613e-07	4.97788	-3.39207e-07	4.97788	-3.4464e-07
5.00188	-5.90218e-07	4.98788	-3.39512e-07	4.98788	-3.44945e-07
5.01188	-6.06697e-07	4.99788	-3.38291e-07	4.99788	-3.43724e-07
5.02188	-5.91438e-07	5.00788	-3.41038e-07	5.00788	-3.46471e-07
5.03188	-6.12801e-07	5.01788	-3.38902e-07	5.01788	-3.44335e-07
5.04188	-5.91744e-07	5.02788	-3.447e-07	5.02788	-3.50133e-07
5.05188	-6.11885e-07	5.03788	-3.43174e-07	5.03788	-3.48607e-07
5.06188	-5.90523e-07	5.04788	-3.45005e-07	5.04788	-3.50438e-07
5.07188	-6.10359e-07	5.05788	-3.4409e-07	5.05788	-3.49523e-07
5.08188	-5.91133e-07	5.06788	-3.47447e-07	5.06788	-3.5288e-07
5.09188	-6.12801e-07	5.07788	-3.42869e-07	5.07788	-3.48302e-07
5.10188	-5.9449e-07	5.08788	-3.48973e-07	5.08788	-3.54406e-07
5.11188	-6.15852e-07	5.09788	-3.41954e-07	5.09788	-3.47387e-07
5.12188	-5.92964e-07	5.10788	-3.49888e-07	5.10788	-3.55321e-07
5.13188	-6.14937e-07	5.11788	-3.45005e-07	5.11788	-3.50438e-07
5.14188	-5.97237e-07	5.12788	-3.50193e-07	5.12788	-3.55626e-07
5.15188	-6.15242e-07	5.13788	-3.45311e-07	5.13788	-3.50743e-07
5.16188	-5.95406e-07	5.14788	-3.52635e-07	5.14788	-3.58068e-07
5.17188	-6.15547e-07	5.15788	-3.48057e-07	5.15788	-3.5349e-07
5.18188	-5.95406e-07	5.16788	-3.5233e-07	5.16788	-3.57763e-07
5.19188	-6.1982e-07	5.17788	-3.48667e-07	5.17788	-3.541e-07
5.20188	-5.99678e-07	5.18788	-3.57212e-07	5.18788	-3.62645e-07
5.21188	-6.17378e-07	5.19788	-3.47142e-07	5.19788	-3.52575e-07
5.22188	-5.97237e-07	5.20788	-3.54161e-07	5.20788	-3.59594e-07
5.23188	-6.17073e-07	5.21788	-3.50804e-07	5.21788	-3.56237e-07
5.24188	-5.98763e-07	5.22788	-3.54466e-07	5.22788	-3.59899e-07
5.25188	-6.2104e-07	5.23788	-3.49278e-07	5.23788	-3.54711e-07
5.26188	-5.99983e-07	5.24788	-3.56602e-07	5.24788	-3.62035e-07
5.27188	-6.18904e-07	5.25788	-3.51109e-07	5.25788	-3.56542e-07
5.28188	-5.99678e-07	5.26788	-3.55381e-07	5.26788	-3.60814e-07
5.29188	-6.20125e-07	5.27788	-3.5294e-07	5.27788	-3.58373e-07
5.30188	-6.0334e-07	5.28788	-3.57212e-07	5.28788	-3.62645e-07
5.31188	-6.23482e-07	5.29788	-3.51414e-07	5.29788	-3.56847e-07
5.32188	-6.03035e-07	5.30788	-3.57823e-07	5.30788	-3.63256e-07
5.33188	-6.22261e-07	5.31788	-3.55076e-07	5.31788	-3.60509e-07
5.34188	-6.01509e-07	5.32788	-3.624e-07	5.32788	-3.67833e-07
5.35188	-6.22261e-07	5.33788	-3.55381e-07	5.33788	-3.60814e-07
5.36188	-6.05476e-07	5.34788	-3.60264e-07	5.34788	-3.65697e-07
5.37188	-6.20735e-07	5.35788	-3.53245e-07	5.35788	-3.58678e-07
5.38188	-6.05476e-07	5.36788	-3.59959e-07	5.36788	-3.65392e-07
5.39188	-6.24092e-07	5.37788	-3.59043e-07	5.37788	-3.64476e-07
5.40188	-6.06697e-07	5.38788	-3.62095e-07	5.38788	-3.67528e-07
5.41188	-6.21956e-07	5.39788	-3.58433e-07	5.39788	-3.63866e-07
5.42188	-6.04866e-07	5.40788	-3.63621e-07	5.40788	-3.69054e-07
5.43188	-6.21346e-07	5.41788	-3.60264e-07	5.41788	-3.65697e-07
5.44188	-6.06392e-07	5.42788	-3.66368e-07	5.42788	-3.71801e-07
5.45188	-6.23177e-07	5.43788	-3.6118e-07	5.43788	-3.66613e-07
5.46188	-6.04561e-07	5.44788	-3.70945e-07	5.44788	-3.76378e-07
5.47188	-6.26534e-07	5.45788	-3.63926e-07	5.45788	-3.69359e-07
5.48188	-6.07613e-07	5.46788	-3.67894e-07	5.46788	-3.73326e-07
5.49188	-6.27449e-07	5.47788	-3.64842e-07	5.47788	-3.70275e-07
5.50188	-6.09444e-07	5.48788	-3.71861e-07	5.48788	-3.77294e-07
5.51188	-6.24092e-07	5.49788	-3.63926e-07	5.49788	-3.69359e-07
5.52188	-6.09749e-07	5.50788	-3.68504e-07	5.50788	-3.73937e-07
5.53188	-6.29585e-07	5.51788	-3.62706e-07	5.51788	-3.68138e-07
5.54188	-6.12801e-07	5.52788	-3.72471e-07	5.52788	-3.77904e-07
5.55188	-6.2867e-07	5.53788	-3.66978e-07	5.53788	-3.72411e-07
5.56188	-6.11275e-07	5.54788	-3.73082e-07	5.54788	-3.78514e-07
5.57188	-6.26534e-07	5.55788	-3.68504e-07	5.55788	-3.73937e-07
5.58188	-6.12801e-07	5.56788	-3.73692e-07	5.56788	-3.79125e-07
5.59188	-6.30806e-07	5.57788	-3.7064e-07	5.57788	-3.76073e-07
5.60188	-6.13411e-07	5.58788	-3.77049e-07	5.58788	-3.82482e-07
5.61188	-6.31722e-07	5.59788	-3.69114e-07	5.59788	-3.74547e-07
5.62188	-6.1097e-07	5.60788	-3.74302e-07	5.60788	-3.79735e-07
5.63188	-6.30806e-07	5.61788	-3.73387e-07	5.61788	-3.7882e-07
5.64188	-6.14937e-07	5.62788	-3.75828e-07	5.62788	-3.81261e-07
5.65188	-6.31111e-07	5.63788	-3.7064e-07	5.63788	-3.76073e-07
5.66188	-6.14632e-07	5.64788	-3.75523e-07	5.64788	-3.80956e-07
5.67188	-6.34468e-07	5.65788	-3.70335e-07	5.65788	-3.75768e-07
5.68188	-6.17378e-07	5.66788	-3.76438e-07	5.66788	-3.81871e-07
5.69188	-6.32637e-07	5.67788	-3.74607e-07	5.67788	-3.8004e-07
5.70188	-6.16463e-07	5.68788	-3.80406e-07	5.68788	-3.85839e-07
5.71188	-6.33858e-07	5.69788	-3.76744e-07	5.69788	-3.82177e-07
5.72188	-6.17989e-07	5.70788	-3.7888e-07	5.70788	-3.84313e-07
5.73188	-6.34468e-07	5.71788	-3.7827e-07	5.71788	-3.83702e-07
5.74188	-6.16158e-07	5.72788	-3.80406e-07	5.72788	-3.85839e-07
5.75188	-6.35689e-07	5.73788	-3.76744e-07	5.73788	-3.82177e-07
5.76188	-6.17378e-07	5.74788	-3.81321e-07	5.74788	-3.86754e-07
5.77188	-6.37215e-07	5.75788	-3.75828e-07	5.75788	-3.81261e-07
5.78188	-6.18904e-07	5.76788	-3.85899e-07	5.76788	-3.91332e-07
5.8821	4.03899e-06	5.8679	4.12094e-06	5.8679	4.1155e-06
5.9821	2.77526e-06	5.9679	2.93289e-06	5.9679	2.92745e-06
6.0821	2.1405e-06	6.0679	2.31063e-06	6.0679	2.3052e-06
6.1821	1.74407e-06	6.1679	1.92092e-06	6.1679	1.91549e-06
6.2821	1.4685e-06	6.2679	1.64749e-06	6.2679	1.64205e-06
6.3821	1.26525e-06	6.3679	1.44363e-06	6.3679	1.4382e-06
6.4821	1.10717e-06	6.4679	1.29043e-06	6.4679	1.285e-06
6.5821	9.82353e-07	6.5679	1.16806e-06	6.5679	1.16262e-06
6.6821	8.82256e-07	6.6679	1.07162e-06	6.6679	1.06619e-06
6.7821	8.00774e-07	6.7679	9.89528e-07	6.7679	9.84095e-07
6.8821	7.3333e-07	6.8679	9.22695e-07	6.8679	9.17262e-07
6.9821	6.77483e-07	6.9679	8.64101e-07	6.9679	8.58668e-07
7.0821	6.26518e-07	7.0679	8.14052e-07	7.0679	8.08619e-07
7.1821	5.84404e-07	7.1679	7.68276e-07	7.1679	7.62843e-07
7.2821	5.47783e-07	7.2679	7.29519e-07	7.2679	7.24086e-07
7.3821	5.1757e-07	7.3679	6.95949e-07	7.3679	6.90516e-07
7.4821	4.92546e-07	7.4679	6.64211e-07	7.4679	6.58778e-07
7.5821	4.69963e-07	7.5679	6.37355e-07	7.5679	6.31923e-07
7.6821	4.51652e-07	7.6679	6.16604e-07	7.6679	6.11171e-07
7.7821	4.33647e-07	7.7679	5.93715e-07	7.7679	5.88282e-07
7.8821	4.19914e-07	7.8679	5.74794e-07	7.8679	5.69362e-07
7.9821	4.06181e-07	7.9679	5.55568e-07	7.9679	5.50135e-07
8.0821	3.9489e-07	8.0679	5.40615e-07	8.0679	5.35182e-07
8.1821	3.84209e-07	8.1679	5.25051e-07	8.1679	5.19618e-07
8.2821	3.73833e-07	8.2679	5.12539e-07	8.2679	5.07106e-07
8.3821	3.64372e-07	8.3679	5.00026e-07	8.3679	4.94593e-07
8.4821	3.57964e-07	8.4679	4.8965e-07	8.4679	4.84217e-07
8.5821	3.50944e-07	8.5679	4.808e-07	8.5679	4.75367e-07
8.6821	3.41789e-07	8.6679	4.71645e-07	8.6679	4.66212e-07
8.7821	3.38127e-07	8.7679	4.63405e-07	8.7679	4.57972e-07
8.8821	3.31108e-07	8.8679	4.5486e-07	8.8679	4.49427e-07
8.9821	3.22258e-07	8.9679	4.48757e-07	8.9679	4.43324e-07
9.0821	3.13713e-07	9.0679	4.40822e-07	9.0679	4.35389e-07
9.1821	3.06999e-07	9.1679	4.35024e-07	9.1679	4.29591e-07
9.2821	3.03947e-07	9.2679	4.30141e-07	9.2679	4.24708e-07
9.3821	2.98149e-07	9.3679	4.25869e-07	9.3679	4.20436e-07
9.4821	2.93266e-07	9.4679	4.23427e-07	9.4679	4.17994e-07
9.5821	2.86552e-07	9.5679	4.15798e-07	9.5679	4.10365e-07
9.6821	2.81059e-07	9.6679	4.09084e-07	9.6679	4.03651e-07
9.7821	2.77397e-07	9.7679	4.03591e-07	9.7679	3.98158e-07
9.8821	2.76787e-07	9.8679	3.95656e-07	9.8679	3.90223e-07
9.9821	2.74345e-07	9.9679	3.89858e-07	9.9679	3.84425e-07
10.0821	2.7343e-07	10.0679	3.87722e-07	10.0679	3.82289e-07
10.1821	2.70073e-07	10.1679	3.8406e-07	10.1679	3.78627e-07
10.2821	2.67326e-07	10.2679	3.80397e-07	10.2679	3.74965e-07
10.3821	2.63664e-07	10.3679	3.77041e-07	10.3679	3.71608e-07
10.4821	2.60918e-07	10.4679	3.77041e-07	10.4679	3.71608e-07
10.5821	2.5695e-07	10.5679	3.73378e-07	10.5679	3.67945e-07
10.6821	2.53288e-07	10.6679	3.70021e-07	10.6679	3.64589e-07
10.7821	2.49626e-07	10.7679	3.6697e-07	10.7679	3.61537e-07
10.8821	2.45659e-07	10.8679	3.62087e-07	10.8679	3.56654e-07
10.9821	2.44743e-07	10.9679	3.59035e-07	10.9679	3.53602e-07
11.0821	2.40471e-07	11.0679	3.53542e-07	11.0679	3.48109e-07
11.1821	2.37114e-07	11.1679	3.49575e-07	11.1679	3.44142e-07
11.2821	2.35283e-07	11.2679	3.44082e-07	11.2679	3.38649e-07
11.3821	2.33757e-07	11.3679	3.4225e-07	11.3679	3.36818e-07
11.4821	2.33147e-07	11.4679	3.37063e-07	11.4679	3.3163e-07
11.5821	2.34672e-07	11.5679	3.33706e-07	11.5679	3.28273e-07
11.6821	2.35588e-07	11.6679	3.334e-07	11.6679	3.27967e-07
11.7821	2.34978e-07	11.7679	3.30654e-07	11.7679	3.25221e-07
11.8821	2.34672e-07	11.8679	3.28212e-07	11.8679	3.22779e-07
11.9821	2.31621e-07	11.9679	3.26076e-07	11.9679	3.20643e-07
12.0821	2.30705e-07	12.0679	3.25466e-07	12.0679	3.20033e-07
12.1821	2.27959e-07	12.1679	3.22719e-07	12.1679	3.17286e-07
12.2821	2.25822e-07	12.2679	3.20583e-07	12.2679	3.1515e-07
12.3821	2.22465e-07	12.3679	3.17836e-07	12.3679	3.12403e-07
12.4821	2.19414e-07	12.4679	3.1509e-07	12.4679	3.09657e-07
12.5821	2.18803e-07	12.5679	3.12954e-07	12.5679	3.07521e-07
12.6821	2.2094e-07	12.6679	3.09902e-07	12.6679	3.04469e-07
12.7821	2.20634e-07	12.7679	3.07766e-07	12.7679	3.02333e-07
12.8821	2.16667e-07	12.8679	3.05935e-07	12.8679	3.00502e-07
12.9821	2.12395e-07	12.9679	3.03188e-07	12.9679	2.97755e-07
13.0821	2.09953e-07	13.0679	3.00747e-07	13.0679	2.95314e-07
13.1821	2.06291e-07	13.1679	2.98305e-07	13.1679	2.92872e-07
13.2821	2.05681e-07	13.2679	2.95864e-07	13.2679	2.90431e-07
13.3821	2.01408e-07	13.3679	2.94643e-07	13.3679	2.8921e-07
13.4821	2.00493e-07	13.4679	2.92202e-07	13.4679	2.86769e-07
13.5821	1.99272e-07	13.5679	2.89455e-07	13.5679	2.84022e-07
13.6821	1.99882e-07	13.6679	2.8915e-07	13.6679	2.83717e-07
13.7821	1.98662e-07	13.7679	2.85183e-07	13.7679	2.7975e-07
13.8821	1.9622e-07	13.8679	2.85793e-07	13.8679	2.8036e-07
13.9821	1.9561e-07	13.9679	2.8091e-07	13.9679	2.75477e-07
14.0821	1.94694e-07	14.0679	2.79079e-07	14.0679	2.73646e-07
14.1821	1.95915e-07	14.1679	2.77858e-07	14.1679	2.72425e-07
14.2821	1.98051e-07	14.2679	2.74501e-07	14.2679	2.69069e-07
14.3821	1.96526e-07	14.3679	2.73281e-07	14.3679	2.67848e-07
14.4821	1.9561e-07	14.4679	2.71145e-07	14.4679	2.65712e-07
14.5821	1.9561e-07	14.5679	2.7145e-07	14.5679	2.66017e-07
14.6821	1.94084e-07	14.6679	2.69313e-07	14.6679	2.63881e-07
14.7821	1.92558e-07	14.7679	2.67177e-07	14.7679	2.61744e-07
14.8821	1.92253e-07	14.8679	2.66567e-07	14.8679	2.61134e-07
14.9821	1.89812e-07	14.9679	2.65346e-07	14.9679	2.59913e-07
15.0821	1.88896e-07	15.0679	2.64431e-07	15.0679	2.58998e-07
15.1821	1.87981e-07	15.1679	2.64736e-07	15.1679	2.59303e-07
15.2821	1.88591e-07	15.2679	2.60158e-07	15.2679	2.54725e-07
15.3821	1.89201e-07	15.3679	2.59548e-07	15.3679	2.54115e-07
15.4821	1.89201e-07	15.4679	2.58938e-07	15.4679	2.53505e-07
15.5821	1.88591e-07	15.5679	2.58022e-07	15.5679	2.52589e-07
15.6821	1.87675e-07	15.6679	2.55275e-07	15.6679	2.49842e-07
15.7821	1.84318e-07	15.7679	2.57106e-07	15.7679	2.51674e-07
15.8821	1.80351e-07	15.8679	2.54665e-07	15.8679	2.49232e-07
15.9821	1.79131e-07	15.9679	2.54055e-07	15.9679	2.48622e-07
16.0821	1.7852e-07	16.0679	2.5375e-07	16.0679	2.48317e-07
16.1821	1.77605e-07	16.1679	2.50698e-07	16.1679	2.45265e-07
16.2821	1.76689e-07	16.2679	2.50393e-07	16.2679	2.4496e-07
16.3821	1.79436e-07	16.3679	2.49172e-07	16.3679	2.43739e-07
16.4821	1.7791e-07	16.4679	2.48562e-07	16.4679	2.43129e-07
16.5821	1.79436e-07	16.5679	2.45815e-07	16.5679	2.40382e-07
16.6821	1.76384e-07	16.6679	2.4551e-07	16.6679	2.40077e-07
16.7821	1.77299e-07	16.7679	2.45815e-07	16.7679	2.40382e-07
16.8821	1.76689e-07	16.8679	2.4551e-07	16.8679	2.40077e-07
16.9821	1.76079e-07	16.9679	2.45815e-07	16.9679	2.40382e-07
17.0821	1.75774e-07	17.0679	2.45815e-07	17.0679	2.40382e-07
17.1821	1.75163e-07	17.1679	2.43984e-07	17.1679	2.38551e-07
17.2821	1.75774e-07	17.2679	2.43374e-07	17.2679	2.37941e-07
17.3821	1.73637e-07	17.3679	2.40017e-07	17.3679	2.34584e-07
17.4821	1.71806e-07	17.4679	2.39406e-07	17.4679	2.33973e-07
17.5821	1.69975e-07	17.5679	2.38491e-07	17.5679	2.33058e-07
17.6821	1.68755e-07	17.6679	2.38186e-07	17.6679	2.32753e-07
17.7821	1.6967e-07	17.7679	2.33608e-07	17.7679	2.28175e-07
17.8821	1.68144e-07	17.8679	2.32082e-07	17.8679	2.26649e-07
17.9821	1.67839e-07	17.9679	2.29335e-07	17.9679	2.23903e-07
18.0821	1.67839e-07	18.0679	2.2903e-07	18.0679	2.23597e-07
18.1821	1.66923e-07	18.1679	2.28115e-07	18.1679	2.22682e-07
18.2821	1.65092e-07	18.2679	2.25368e-07	18.2679	2.19935e-07
18.3821	1.62956e-07	18.3679	2.26284e-07	18.3679	2.20851e-07
18.4821	1.59294e-07	18.4679	2.24147e-07	18.4679	2.18715e-07
18.5821	1.57768e-07	18.5679	2.25063e-07	18.5679	2.1963e-07
18.6821	1.53496e-07	18.6679	2.25063e-07	18.6679	2.1963e-07
18.7821	1.51665e-07	18.7679	2.24758e-07	18.7679	2.19325e-07
18.8821	1.51054e-07	18.8679	2.24453e-07	18.8679	2.1902e-07
18.9821	1.49528e-07	18.9679	2.22622e-07	18.9679	2.17189e-07
19.0821	1.48308e-07	19.0679	2.22316e-07	19.0679	2.16883e-07
19.1821	1.46782e-07	19.1679	2.2018e-07	19.1679	2.14747e-07
19.2821	1.46172e-07	19.2679	2.20791e-07	19.2679	2.15358e-07
19.3821	1.4373e-07	19.3679	2.18959e-07	19.3679	2.13527e-07
19.4821	1.42815e-07	19.4679	2.16213e-07	19.4679	2.1078e-07
19.5821	1.40678e-07	19.5679	2.16213e-07	19.5679	2.1078e-07
19.6821	1.39763e-07	19.6679	2.14687e-07	19.6679	2.09254e-07
19.7821	1.39763e-07	19.7679	2.15603e-07	19.7679	2.1017e-07
19.8821	1.37321e-07	19.8679	2.14382e-07	19.8679	2.08949e-07
19.9821	1.38847e-07	19.9679	2.11635e-07	19.9679	2.06202e-07
20.0821	1.35796e-07	20.0679	2.12246e-07	20.0679	2.06813e-07
20.1821	1.3488e-07	20.1679	2.12551e-07	20.1679	2.07118e-07
20.2821	1.33964e-07	20.2679	2.11025e-07	20.2679	2.05592e-07
20.3821	1.32439e-07	20.3679	2.10415e-07	20.3679	2.04982e-07
20.4821	1.32133e-07	20.4679	2.09194e-07	20.4679	2.03761e-07
20.5821	1.32439e-07	20.5679	2.10109e-07	20.5679	2.04676e-07
20.6821	1.32744e-07	20.6679	2.09194e-07	20.6679	2.03761e-07
20.7821	1.30608e-07	20.7679	2.09194e-07	20.7679	2.03761e-07
20.8821	1.31828e-07	20.8679	2.1072e-07	20.8679	2.05287e-07
20.9821	1.29997e-07	20.9679	2.1072e-07	20.9679	2.05287e-07
21.0821	1.31218e-07	21.0679	2.13161e-07	21.0679	2.07728e-07
21.1821	1.29997e-07	21.1679	2.10415e-07	21.1679	2.04982e-07
21.2821	1.28471e-07	21.2679	2.11635e-07	21.2679	2.06202e-07
21.3821	1.29387e-07	21.3679	2.11025e-07	21.3679	2.05592e-07
21.4821	1.31828e-07	21.4679	2.1194e-07	21.4679	2.06508e-07
21.5821	1.31523e-07	21.5679	2.1133e-07	21.5679	2.05897e-07
21.6821	1.32744e-07	21.6679	2.09804e-07	21.6679	2.04371e-07
21.7821	1.3427e-07	21.7679	2.08889e-07	21.7679	2.03456e-07
21.8821	1.32744e-07	21.8679	2.07668e-07	21.8679	2.02235e-07
21.9821	1.32744e-07	21.9679	2.06447e-07	21.9679	2.01014e-07
22.0821	1.32439e-07	22.0679	2.04006e-07	22.0679	1.98573e-07
22.1821	1.3427e-07	22.1679	2.02785e-07	22.1679	1.97352e-07
22.2821	1.32133e-07	22.2679	2.00954e-07	22.2679	1.95521e-07
22.3821	1.29997e-07	22.3679	1.99428e-07	22.3679	1.93995e-07
22.4821	1.29082e-07	22.4679	1.98513e-07	22.4679	1.9308e-07
22.5821	1.26945e-07	22.5679	1.96987e-07	22.5679	1.91554e-07
22.6821	1.26945e-07	22.6679	1.94851e-07	22.6679	1.89418e-07
22.7821	1.2542e-07	22.7679	1.93325e-07	22.7679	1.87892e-07
22.8821	1.27556e-07	22.8679	1.9424e-07	22.8679	1.88807e-07
22.9821	1.26335e-07	22.9679	1.93325e-07	22.9679	1.87892e-07
23.0821	1.24809e-07	23.0679	1.91799e-07	23.0679	1.86366e-07
23.1821	1.2603e-07	23.1679	1.90578e-07	23.1679	1.85145e-07
23.2821	1.24504e-07	23.2679	1.89663e-07	23.2679	1.8423e-07
23.3821	1.25114e-07	23.3679	1.89052e-07	23.3679	1.83619e-07
23.4821	1.22368e-07	23.4679	1.87832e-07	23.4679	1.82399e-07
23.5821	1.20842e-07	23.5679	1.87526e-07	23.5679	1.82093e-07
23.6821	1.19011e-07	23.6679	1.86e-07	23.6679	1.80568e-07
23.7821	1.19926e-07	23.7679	1.8539e-07	23.7679	1.79957e-07
23.8821	1.18401e-07	23.8679	1.8478e-07	23.8679	1.79347e-07
23.9821	1.18401e-07	23.9679	1.84169e-07	23.9679	1.78737e-07
24.0821	1.18401e-07	24.0679	1.82644e-07	24.0679	1.77211e-07
24.1821	1.18706e-07	24.1679	1.81728e-07	24.1679	1.76295e-07
24.2821	1.1779e-07	24.2679	1.81728e-07	24.2679	1.76295e-07
24.3821	1.16875e-07	24.3679	1.79897e-07	24.3679	1.74464e-07
24.4821	1.15654e-07	24.4679	1.78981e-07	24.4679	1.73549e-07
24.5821	1.14433e-07	24.5679	1.79287e-07	24.5679	1.73854e-07
24.6821	1.15959e-07	24.6679	1.78676e-07	24.6679	1.73243e-07
24.7821	1.15349e-07	24.7679	1.78066e-07	24.7679	1.72633e-07
24.8821	1.16569e-07	24.8679	1.78981e-07	24.8679	1.73549e-07
24.9821	1.16264e-07	24.9679	1.78981e-07	24.9679	1.73549e-07
25.0821	1.19011e-07	25.0679	1.79592e-07	25.0679	1.74159e-07
25.1821	1.18401e-07	25.1679	1.77456e-07	25.1679	1.72023e-07
25.2821	1.19011e-07	25.2679	1.74709e-07	25.2679	1.69276e-07
25.3821	1.19621e-07	25.3679	1.7654e-07	25.3679	1.71107e-07
25.4821	1.19011e-07	25.4679	1.75625e-07	25.4679	1.70192e-07
25.5821	1.1718e-07	25.5679	1.72878e-07	25.5679	1.67445e-07
25.6821	1.16264e-07	25.6679	1.73183e-07	25.6679	1.6775e-07
25.7821	1.16569e-07	25.7679	1.72878e-07	25.7679	1.67445e-07
25.8821	1.14738e-07	25.8679	1.74099e-07	25.8679	1.68666e-07
25.9821	1.14128e-07	25.9679	1.74099e-07	25.9679	1.68666e-07
26.0821	1.12297e-07	26.0679	1.72878e-07	26.0679	1.67445e-07
26.1821	1.14128e-07	26.1679	1.71657e-07	26.1679	1.66224e-07
26.2821	1.13823e-07	26.2679	1.73183e-07	26.2679	1.6775e-07
26.3821	1.11687e-07	26.3679	1.72878e-07	26.3679	1.67445e-07
26.4821	1.13823e-07	26.4679	1.70131e-07	26.4679	1.64698e-07
26.5821	1.12907e-07	26.5679	1.69521e-07	26.5679	1.64088e-07
26.6821	1.12602e-07	26.6679	1.68605e-07	26.6679	1.63173e-07
26.7821	1.11076e-07	26.7679	1.69216e-07	26.7679	1.63783e-07
26.8821	1.11381e-07	26.8679	1.68605e-07	26.8679	1.63173e-07
26.9821	1.11381e-07	26.9679	1.6708e-07	26.9679	1.61647e-07
27.0821	1.11992e-07	27.0679	1.67385e-07	27.0679	1.61952e-07
27.1821	1.11687e-07	27.1679	1.6769e-07	27.1679	1.62257e-07
27.2821	1.10771e-07	27.2679	1.68911e-07	27.2679	1.63478e-07
27.3821	1.11687e-07	27.3679	1.683e-07	27.3679	1.62867e-07
27.4821	1.09245e-07	27.4679	1.683e-07	27.4679	1.62867e-07
27.5821	1.06804e-07	27.5679	1.683e-07	27.5679	1.62867e-07
27.6821	1.04973e-07	27.6679	1.683e-07	27.6679	1.62867e-07
27.7821	1.04973e-07	27.7679	1.6769e-07	27.7679	1.62257e-07
27.8821	1.04057e-07	27.8679	1.66774e-07	27.8679	1.61341e-07
27.9821	1.02837e-07	27.9679	1.64333e-07	27.9679	1.589e-07
28.0821	1.01921e-07	28.0679	1.61892e-07	28.0679	1.56459e-07
28.1821	1.02531e-07	28.1679	1.62502e-07	28.1679	1.57069e-07
28.2821	1.007e-07	28.2679	1.61281e-07	28.2679	1.55848e-07
28.3821	1.007e-07	28.3679	1.59755e-07	28.3679	1.54322e-07
28.4821	1.02531e-07	28.4679	1.59755e-07	28.4679	1.54322e-07
28.5821	1.02226e-07	28.5679	1.57314e-07	28.5679	1.51881e-07
28.6821	1.03447e-07	28.6679	1.58535e-07	28.6679	1.53102e-07
28.7821	1.01006e-07	28.7679	1.5884e-07	28.7679	1.53407e-07
28.8821	1.03447e-07	28.8679	1.5884e-07	28.8679	1.53407e-07
28.9821	1.04973e-07	28.9679	1.57619e-07	28.9679	1.52186e-07
29.0821	1.04362e-07	29.0679	1.5884e-07	29.0679	1.53407e-07
29.1821	1.04973e-07	29.1679	1.5884e-07	29.1679	1.53407e-07
29.2821	1.02837e-07	29.2679	1.56704e-07	29.2679	1.51271e-07
29.3821	1.03447e-07	29.3679	1.57619e-07	29.3679	1.52186e-07
29.4821	1.04057e-07	29.4679	1.5823e-07	29.4679	1.52797e-07
29.5821	1.03752e-07	29.5679	1.57009e-07	29.5679	1.51576e-07
29.6821	1.03142e-07	29.6679	1.57619e-07	29.6679	1.52186e-07
29.7821	1.01006e-07	29.7679	1.56704e-07	29.7679	1.51271e-07
29.8821	9.85641e-08	29.8679	1.54873e-07	29.8679	1.4944e-07
29.9821	9.94796e-08	29.9679	1.52736e-07	29.9679	1.47303e-07
30.0821	9.82589e-08	30.0679	1.50905e-07	30.0679	1.45472e-07
30.1821	9.64279e-08	30.1679	1.49685e-07	30.1679	1.44252e-07
30.2821	9.64279e-08	30.2679	1.49074e-07	30.2679	1.43641e-07
30.3821	9.42916e-08	30.3679	1.47548e-07	30.3679	1.42115e-07
30.4821	9.42916e-08	30.4679	1.46328e-07	30.4679	1.40895e-07
30.5821	9.39865e-08	30.5679	1.44802e-07	30.5679	1.39369e-07
30.6821	9.55123e-08	30.6679	1.44497e-07	30.6679	1.39064e-07
30.7821	9.55123e-08	30.7679	1.44191e-07	30.7679	1.38758e-07
30.8821	9.55123e-08	30.8679	1.44191e-07	30.8679	1.38758e-07
30.9821	9.52072e-08	30.9679	1.42055e-07	30.9679	1.36622e-07
31.0821	9.58175e-08	31.0679	1.44497e-07	31.0679	1.39064e-07
31.1821	9.76486e-08	31.1679	1.44191e-07	31.1679	1.38758e-07
31.2821	9.76486e-08	31.2679	1.46022e-07	31.2679	1.4059e-07
31.3821	9.73434e-08	31.3679	1.43886e-07	31.3679	1.38453e-07
31.4821	9.4902e-08	31.4679	1.43276e-07	31.4679	1.37843e-07
31.5821	9.4902e-08	31.5679	1.42666e-07	31.5679	1.37233e-07
31.6821	9.4902e-08	31.6679	1.4236e-07	31.6679	1.36927e-07
31.7821	9.39865e-08	31.7679	1.42055e-07	31.7679	1.36622e-07
31.8821	9.36813e-08	31.8679	1.40834e-07	31.8679	1.35402e-07
31.9821	8.81881e-08	31.9679	1.40224e-07	31.9679	1.34791e-07
32.0821	8.78829e-08	32.0679	1.39614e-07	32.0679	1.34181e-07
32.1821	8.63571e-08	32.1679	1.4114e-07	32.1679	1.35707e-07
32.2821	8.54415e-08	32.2679	1.39003e-07	32.2679	1.3357e-07
32.3821	8.51364e-08	32.3679	1.39003e-07	32.3679	1.3357e-07
32.4821	8.4526e-08	32.4679	1.40529e-07	32.4679	1.35096e-07
32.5821	8.42208e-08	32.5679	1.39309e-07	32.5679	1.33876e-07
32.6821	8.36105e-08	32.6679	1.38393e-07	32.6679	1.3296e-07
32.7821	8.36105e-08	32.7679	1.38088e-07	32.7679	1.32655e-07
32.8821	8.4526e-08	32.8679	1.39614e-07	32.8679	1.34181e-07
32.9821	8.42208e-08	32.9679	1.37783e-07	32.9679	1.3235e-07
33.0821	8.57467e-08	33.0679	1.38393e-07	33.0679	1.3296e-07
33.1821	8.54415e-08	33.1679	1.37783e-07	33.1679	1.3235e-07
33.2821	8.66622e-08	33.2679	1.39003e-07	33.2679	1.3357e-07
33.3821	8.51364e-08	33.3679	1.39614e-07	33.3679	1.34181e-07
33.4821	8.81881e-08	33.4679	1.38088e-07	33.4679	1.32655e-07
33.5821	8.60519e-08	33.5679	1.37172e-07	33.5679	1.31739e-07
33.6821	8.69674e-08	33.6679	1.37478e-07	33.6679	1.32045e-07
33.7821	8.72726e-08	33.7679	1.37783e-07	33.7679	1.3235e-07
33.8821	8.87985e-08	33.8679	1.35952e-07	33.8679	1.30519e-07
33.9821	8.69674e-08	33.9679	1.36867e-07	33.9679	1.31434e-07
34.0821	8.87985e-08	34.0679	1.36562e-07	34.0679	1.31129e-07
34.1821	8.78829e-08	34.1679	1.37478e-07	34.1679	1.32045e-07
34.2821	8.57467e-08	34.2679	1.37783e-07	34.2679	1.3235e-07
34.3821	8.42208e-08	34.3679	1.37478e-07	34.3679	1.32045e-07
34.4821	8.2695e-08	34.4679	1.38393e-07	34.4679	1.3296e-07
34.5821	8.2695e-08	34.5679	1.37783e-07	34.5679	1.3235e-07
34.6821	8.17794e-08	34.6679	1.37783e-07	34.6679	1.3235e-07
34.7821	8.08639e-08	34.7679	1.39003e-07	34.7679	1.3357e-07
34.8821	7.96432e-08	34.8679	1.38698e-07	34.8679	1.33265e-07
34.9821	7.99484e-08	34.9679	1.38698e-07	34.9679	1.33265e-07
35.0821	7.87277e-08	35.0679	1.39614e-07	35.0679	1.34181e-07
35.1821	7.81173e-08	35.1679	1.37172e-07	35.1679	1.31739e-07
35.2821	7.59811e-08	35.2679	1.36562e-07	35.2679	1.31129e-07
35.3821	7.44552e-08	35.3679	1.37783e-07	35.3679	1.3235e-07
35.4821	7.50656e-08	35.4679	1.35646e-07	35.4679	1.30214e-07
35.5821	7.50656e-08	35.5679	1.36562e-07	35.5679	1.31129e-07
35.6821	7.50656e-08	35.6679	1.35646e-07	35.6679	1.30214e-07
35.7821	7.56759e-08	35.7679	1.35036e-07	35.7679	1.29603e-07
35.8821	7.50656e-08	35.8679	1.3351e-07	35.8679	1.28077e-07
35.9821	7.38449e-08	35.9679	1.34121e-07	35.9679	1.28688e-07
36.0821	7.32345e-08	36.0679	1.33815e-07	36.0679	1.28383e-07
36.1821	7.35397e-08	36.1679	1.33205e-07	36.1679	1.27772e-07
36.2821	7.29293e-08	36.2679	1.32595e-07	36.2679	1.27162e-07
36.3821	7.29293e-08	36.3679	1.3229e-07	36.3679	1.26857e-07
36.4821	7.50656e-08	36.4679	1.29238e-07	36.4679	1.23805e-07
36.5821	7.47604e-08	36.5679	1.30153e-07	36.5679	1.2472e-07
36.6821	7.7507e-08	36.6679	1.29543e-07	36.6679	1.2411e-07
36.7821	7.59811e-08	36.7679	1.31069e-07	36.7679	1.25636e-07
36.8821	7.56759e-08	36.8679	1.29543e-07	36.8679	1.2411e-07
36.9821	7.68966e-08	36.9679	1.31374e-07	36.9679	1.25941e-07
37.0821	7.72018e-08	37.0679	1.31374e-07	37.0679	1.25941e-07
37.1821	7.56759e-08	37.1679	1.29848e-07	37.1679	1.24415e-07
37.2821	7.47604e-08	37.2679	1.28933e-07	37.2679	1.235e-07
37.3821	7.62863e-08	37.3679	1.27407e-07	37.3679	1.21974e-07
37.4821	7.53707e-08	37.4679	1.26796e-07	37.4679	1.21363e-07
37.5821	7.56759e-08	37.5679	1.26796e-07	37.5679	1.21363e-07
37.6821	7.56759e-08	37.6679	1.2466e-07	37.6679	1.19227e-07
37.7821	7.56759e-08	37.7679	1.24965e-07	37.7679	1.19532e-07
37.8821	7.56759e-08	37.8679	1.23439e-07	37.8679	1.18007e-07
37.9821	7.53707e-08	37.9679	1.22219e-07	37.9679	1.16786e-07
38.0821	7.47604e-08	38.0679	1.22524e-07	38.0679	1.17091e-07
38.1821	7.50656e-08	38.1679	1.21303e-07	38.1679	1.1587e-07
38.2821	7.35397e-08	38.2679	1.22524e-07	38.2679	1.17091e-07
38.3821	7.29293e-08	38.3679	1.23134e-07	38.3679	1.17701e-07
38.4821	7.56759e-08	38.4679	1.19472e-07	38.4679	1.14039e-07
38.5821	7.50656e-08	38.5679	1.19167e-07	38.5679	1.13734e-07
38.6821	7.35397e-08	38.6679	1.19167e-07	38.6679	1.13734e-07
38.7821	7.2319e-08	38.7679	1.18251e-07	38.7679	1.12819e-07
38.8821	7.10983e-08	38.8679	1.17336e-07	38.8679	1.11903e-07
38.9821	7.04879e-08	38.9679	1.17031e-07	38.9679	1.11598e-07
39.0821	6.92672e-08	39.0679	1.14589e-07	39.0679	1.09156e-07
39.1821	6.74362e-08	39.1679	1.14284e-07	39.1679	1.08851e-07
39.2821	6.83517e-08	39.2679	1.13979e-07	39.2679	1.08546e-07
39.3821	6.95724e-08	39.3679	1.14895e-07	39.3679	1.09462e-07
39.4821	7.01828e-08	39.4679	1.14284e-07	39.4679	1.08851e-07
39.5821	7.07931e-08	39.5679	1.16115e-07	39.5679	1.10682e-07
39.6821	6.98776e-08	39.6679	1.152e-07	39.6679	1.09767e-07
39.7821	6.74362e-08	39.7679	1.1581e-07	39.7679	1.10377e-07
39.8821	6.62155e-08	39.8679	1.17031e-07	39.8679	1.11598e-07
39.9821	6.34689e-08	39.9679	1.16726e-07	39.9679	1.11293e-07
40.0821	6.13327e-08	40.0679	1.17336e-07	40.0679	1.11903e-07
40.1821	6.04171e-08	40.1679	1.16115e-07	40.1679	1.10682e-07
40.2821	6.0112e-08	40.2679	1.15505e-07	40.2679	1.10072e-07
40.3821	5.85861e-08	40.3679	1.14895e-07	40.3679	1.09462e-07
40.4821	5.88912e-08	40.4679	1.13979e-07	40.4679	1.08546e-07
40.5821	6.04171e-08	40.5679	1.12453e-07	40.5679	1.0702e-07
40.6821	5.98068e-08	40.6679	1.12453e-07	40.6679	1.0702e-07
40.7821	5.79757e-08	40.7679	1.11232e-07	40.7679	1.05799e-07
40.8821	5.73654e-08	40.8679	1.12453e-07	40.8679	1.0702e-07
40.9821	5.82809e-08	40.9679	1.11843e-07	40.9679	1.0641e-07
41.0821	5.73654e-08	41.0679	1.13063e-07	41.0679	1.07631e-07
41.1821	5.73654e-08	41.1679	1.12453e-07	41.1679	1.0702e-07
41.2821	5.70602e-08	41.2679	1.12148e-07	41.2679	1.06715e-07
41.3821	5.61447e-08	41.3679	1.12148e-07	41.3679	1.06715e-07
41.4821	5.55343e-08	41.4679	1.11232e-07	41.4679	1.05799e-07
41.5821	5.46188e-08	41.5679	1.11232e-07	41.5679	1.05799e-07
41.6821	5.58395e-08	41.6679	1.12453e-07	41.6679	1.0702e-07
41.7821	5.58395e-08	41.7679	1.13369e-07	41.7679	1.07936e-07
41.8821	5.55343e-08	41.8679	1.13369e-07	41.8679	1.07936e-07
41.9821	5.4924e-08	41.9679	1.14284e-07	41.9679	1.08851e-07
42.0821	5.43136e-08	42.0679	1.11843e-07	42.0679	1.0641e-07
42.1821	5.43136e-08	42.1679	1.10927e-07	42.1679	1.05494e-07
42.2821	5.37033e-08	42.2679	1.10317e-07	42.2679	1.04884e-07
42.3821	5.24826e-08	42.3679	1.09401e-07	42.3679	1.03968e-07
42.4821	5.24826e-08	42.4679	1.09707e-07	42.4679	1.04274e-07
42.5821	5.24826e-08	42.5679	1.08486e-07	42.5679	1.03053e-07
42.6821	5.43136e-08	42.6679	1.0757e-07	42.6679	1.02137e-07
42.7821	5.30929e-08	42.7679	1.0635e-07	42.7679	1.00917e-07
42.8821	5.33981e-08	42.8679	1.05739e-07	42.8679	1.00306e-07
42.9821	5.27877e-08	42.9679	1.04213e-07	42.9679	9.87805e-08
43.0821	5.27877e-08	43.0679	1.04824e-07	43.0679	9.93908e-08
43.1821	5.18722e-08	43.1679	1.02993e-07	43.1679	9.75597e-08
43.2821	5.37033e-08	43.2679	1.03298e-07	43.2679	9.78649e-08
43.3821	5.46188e-08	43.3679	1.03908e-07	43.3679	9.84753e-08
43.4821	5.24826e-08	43.4679	1.02688e-07	43.4679	9.72546e-08
43.5821	5.27877e-08	43.5679	1.01772e-07	43.5679	9.6339e-08
43.6821	5.21774e-08	43.6679	1.00856e-07	43.6679	9.54235e-08
43.7821	5.06515e-08	43.7679	1.01772e-07	43.7679	9.6339e-08
43.8821	5.09567e-08	43.8679	1.00246e-07	43.8679	9.48132e-08
43.9821	5.21774e-08	43.9679	1.01467e-07	43.9679	9.60339e-08
44.0821	5.1567e-08	44.0679	1.02382e-07	44.0679	9.69494e-08
44.1821	5.09567e-08	44.1679	1.01772e-07	44.1679	9.6339e-08
44.2821	5.00412e-08	44.2679	1.01772e-07	44.2679	9.6339e-08
44.3821	4.82101e-08	44.3679	1.02382e-07	44.3679	9.69494e-08
44.4821	4.88204e-08	44.4679	1.02382e-07	44.4679	9.69494e-08
44.5821	4.88204e-08	44.5679	1.02077e-07	44.5679	9.66442e-08
44.6821	4.82101e-08	44.6679	1.02688e-07	44.6679	9.72546e-08
44.7821	4.85153e-08	44.7679	1.01772e-07	44.7679	9.6339e-08
44.8821	4.94308e-08	44.8679	1.01467e-07	44.8679	9.60339e-08
44.9821	4.88204e-08	44.9679	1.00246e-07	44.9679	9.48132e-08
45.0821	4.79049e-08	45.0679	9.99409e-08	45.0679	9.4508e-08
45.1821	4.75997e-08	45.1679	1.00246e-07	45.1679	9.48132e-08
45.2821	4.75997e-08	45.2679	9.93306e-08	45.2679	9.38976e-08
45.3821	4.79049e-08	45.3679	9.93306e-08	45.3679	9.38976e-08
45.4821	4.75997e-08	45.4679	9.90254e-08	45.4679	9.35925e-08
45.5821	4.69894e-08	45.5679	9.93306e-08	45.5679	9.38976e-08
45.6821	4.82101e-08	45.6679	9.87202e-08	45.6679	9.32873e-08
45.7821	4.85153e-08	45.7679	9.59736e-08	45.7679	9.05407e-08
45.8821	4.91256e-08	45.8679	9.62788e-08	45.8679	9.08459e-08
45.9821	4.85153e-08	45.9679	9.59736e-08	45.9679	9.05407e-08
46.0821	4.88204e-08	46.0679	9.62788e-08	46.0679	9.08459e-08
46.1821	4.94308e-08	46.1679	9.50581e-08	46.1679	8.96252e-08
46.2821	5.00412e-08	46.2679	9.35322e-08	46.2679	8.80993e-08
46.3821	4.88204e-08	46.3679	9.32271e-08	46.3679	8.77941e-08
46.4821	4.9736e-08	46.4679	9.44478e-08	46.4679	8.90148e-08
46.5821	4.72946e-08	46.5679	9.32271e-08	46.5679	8.77941e-08
46.6821	4.75997e-08	46.6679	9.26167e-08	46.6679	8.71838e-08
46.7821	4.69894e-08	46.7679	9.35322e-08	46.7679	8.80993e-08
46.8821	4.60739e-08	46.8679	9.35322e-08	46.8679	8.80993e-08
46.9821	4.36325e-08	46.9679	9.38374e-08	46.9679	8.84045e-08
47.0821	4.39376e-08	47.0679	9.32271e-08	47.0679	8.77941e-08
47.1821	4.48532e-08	47.1679	9.23115e-08	47.1679	8.68786e-08
47.2821	4.60739e-08	47.2679	9.32271e-08	47.2679	8.77941e-08
47.3821	4.75997e-08	47.3679	9.32271e-08	47.3679	8.77941e-08
47.4821	4.75997e-08	47.4679	9.35322e-08	47.4679	8.80993e-08
47.5821	4.69894e-08	47.5679	9.23115e-08	47.5679	8.68786e-08
47.6821	4.72946e-08	47.6679	9.35322e-08	47.6679	8.80993e-08
47.7821	4.42428e-08	47.7679	9.20064e-08	47.7679	8.65734e-08
47.8821	4.33273e-08	47.8679	9.26167e-08	47.8679	8.71838e-08
47.9821	4.11911e-08	47.9679	9.20064e-08	47.9679	8.65734e-08
48.0821	4.02755e-08	48.0679	9.10908e-08	48.0679	8.56579e-08
48.1821	3.99704e-08	48.1679	9.26167e-08	48.1679	8.71838e-08
48.2821	3.96652e-08	48.2679	9.1396e-08	48.2679	8.59631e-08
48.3821	3.936e-08	48.3679	9.1396e-08	48.3679	8.59631e-08
48.4821	3.81393e-08	48.4679	9.04805e-08	48.4679	8.50475e-08
48.5821	3.78341e-08	48.5679	9.01753e-08	48.5679	8.47424e-08
48.6821	3.81393e-08	48.6679	8.89546e-08	48.6679	8.35217e-08
48.7821	3.84445e-08	48.7679	8.9565e-08	48.7679	8.4132e-08
48.8821	3.96652e-08	48.8679	8.83442e-08	48.8679	8.29113e-08
48.9821	4.02755e-08	48.9679	8.68184e-08	48.9679	8.13854e-08
49.0821	3.96652e-08	49.0679	8.77339e-08	49.0679	8.2301e-08
49.1821	3.87496e-08	49.1679	8.52925e-08	49.1679	7.98596e-08
49.2821	3.936e-08	49.2679	8.6208e-08	49.2679	8.07751e-08
49.3821	4.02755e-08	49.3679	8.6208e-08	49.3679	8.07751e-08
49.4821	4.11911e-08	49.4679	8.68184e-08	49.4679	8.13854e-08
49.5821	4.08859e-08	49.5679	8.6208e-08	49.5679	8.07751e-08
49.6821	3.96652e-08	49.6679	8.4377e-08	49.6679	7.8944e-08
49.7821	4.08859e-08	49.7679	8.28511e-08	49.7679	7.74181e-08
49.8821	4.14962e-08	49.8679	8.28511e-08	49.8679	7.74181e-08
49.9821	4.18014e-08	49.9679	8.34614e-08	49.9679	7.80285e-08
50.0821	4.27169e-08	50.0679	8.55977e-08	50.0679	8.01647e-08
50.1821	4.4548e-08	50.1679	8.31563e-08	50.1679	7.77233e-08
50.2821	4.6379e-08	50.2679	8.31563e-08	50.2679	7.77233e-08
50.3821	4.69894e-08	50.3679	8.22407e-08	50.3679	7.68078e-08
50.4821	4.82101e-08	50.4679	8.6208e-08	50.4679	8.07751e-08
50.5821	4.79049e-08	50.5679	8.40718e-08	50.5679	7.86389e-08
50.6821	4.75997e-08	50.6679	8.31563e-08	50.6679	7.77233e-08
50.7821	4.66842e-08	50.7679	8.28511e-08	50.7679	7.74181e-08
50.8821	4.57687e-08	50.8679	8.13252e-08	50.8679	7.58923e-08
50.9821	4.33273e-08	50.9679	8.19356e-08	50.9679	7.65026e-08
51.0821	4.33273e-08	51.0679	8.22407e-08	51.0679	7.68078e-08
51.1821	4.24118e-08	51.1679	8.19356e-08	51.1679	7.65026e-08
51.2821	4.27169e-08	51.2679	7.97993e-08	51.2679	7.43664e-08
51.3821	4.11911e-08	51.3679	7.85786e-08	51.3679	7.31457e-08
51.4821	4.14962e-08	51.4679	8.01045e-08	51.4679	7.46716e-08
51.5821	4.33273e-08	51.5679	7.85786e-08	51.5679	7.31457e-08
51.6821	4.30221e-08	51.6679	7.76631e-08	51.6679	7.22302e-08
51.7821	4.18014e-08	51.7679	7.9189e-08	51.7679	7.3756e-08
51.8821	4.11911e-08	51.8679	7.70527e-08	51.8679	7.16198e-08
51.9821	4.14962e-08	51.9679	7.73579e-08	51.9679	7.1925e-08
52.0821	3.99704e-08	52.0679	7.85786e-08	52.0679	7.31457e-08
52.1821	3.87496e-08	52.1679	7.82734e-08	52.1679	7.28405e-08
52.2821	3.936e-08	52.2679	7.76631e-08	52.2679	7.22302e-08
52.3821	3.84445e-08	52.3679	7.73579e-08	52.3679	7.1925e-08
52.4821	3.87496e-08	52.4679	7.61372e-08	52.4679	7.07043e-08
52.5821	3.78341e-08	52.5679	7.64424e-08	52.5679	7.10095e-08
52.6821	3.936e-08	52.6679	7.70527e-08	52.6679	7.16198e-08
52.7821	3.99704e-08	52.7679	7.61372e-08	52.7679	7.07043e-08
52.8821	4.27169e-08	52.8679	7.70527e-08	52.8679	7.16198e-08
52.9821	4.27169e-08	52.9679	7.52217e-08	52.9679	6.97888e-08
53.0821	4.27169e-08	53.0679	7.55269e-08	53.0679	7.00939e-08
53.1821	4.36325e-08	53.1679	7.36958e-08	53.1679	6.82629e-08
53.2821	4.30221e-08	53.2679	7.43062e-08	53.2679	6.88732e-08
53.3821	4.18014e-08	53.3679	7.4001e-08	53.3679	6.85681e-08
53.4821	4.14962e-08	53.4679	7.27803e-08	53.4679	6.73473e-08
53.5821	3.99704e-08	53.5679	7.06441e-08	53.5679	6.52111e-08
53.6821	4.11911e-08	53.6679	7.21699e-08	53.6679	6.6737e-08
53.7821	3.936e-08	53.7679	7.03389e-08	53.7679	6.49059e-08
53.8821	3.90548e-08	53.8679	7.12544e-08	53.8679	6.58215e-08
53.9821	3.75289e-08	53.9679	7.09492e-08	53.9679	6.55163e-08
54.0821	3.50875e-08	54.0679	7.06441e-08	54.0679	6.52111e-08
54.1821	3.38668e-08	54.1679	6.91182e-08	54.1679	6.36852e-08
54.2821	3.26461e-08	54.2679	6.97285e-08	54.2679	6.42956e-08
54.3821	3.11203e-08	54.3679	6.85078e-08	54.3679	6.30749e-08
54.4821	3.08151e-08	54.4679	6.82026e-08	54.4679	6.27697e-08
54.5821	2.86788e-08	54.5679	6.82026e-08	54.5679	6.27697e-08
54.6821	2.95944e-08	54.6679	6.69819e-08	54.6679	6.1549e-08
54.7821	2.86788e-08	54.7679	6.72871e-08	54.7679	6.18542e-08
54.8821	2.80685e-08	54.8679	6.72871e-08	54.8679	6.18542e-08
54.9821	2.80685e-08	54.9679	6.66768e-08	54.9679	6.12438e-08
55.0821	2.7153e-08	55.0679	6.82026e-08	55.0679	6.27697e-08
55.1821	2.68478e-08	55.1679	6.78975e-08	55.1679	6.24645e-08
55.2821	2.62374e-08	55.2679	6.82026e-08	55.2679	6.27697e-08
55.3821	2.56271e-08	55.3679	6.75923e-08	55.3679	6.21594e-08
55.4821	2.56271e-08	55.4679	7.00337e-08	55.4679	6.46008e-08
55.5821	2.59323e-08	55.5679	7.06441e-08	55.5679	6.52111e-08
55.6821	2.53219e-08	55.6679	6.94234e-08	55.6679	6.39904e-08
55.7821	2.47116e-08	55.7679	6.94234e-08	55.7679	6.39904e-08
55.8821	2.59323e-08	55.8679	7.12544e-08	55.8679	6.58215e-08
55.9821	2.53219e-08	55.9679	7.15596e-08	55.9679	6.61266e-08
56.0821	2.47116e-08	56.0679	7.03389e-08	56.0679	6.49059e-08
56.1821	2.50167e-08	56.1679	7.03389e-08	56.1679	6.49059e-08
56.2821	2.41012e-08	56.2679	7.09492e-08	56.2679	6.55163e-08
56.3821	2.44064e-08	56.3679	6.82026e-08	56.3679	6.27697e-08
56.4821	2.47116e-08	56.4679	6.85078e-08	56.4679	6.30749e-08
56.5821	2.62374e-08	56.5679	6.63716e-08	56.5679	6.09387e-08
56.6821	2.50167e-08	56.6679	6.51509e-08	56.6679	5.9718e-08
56.7821	2.34909e-08	56.7679	6.39302e-08	56.7679	5.84972e-08
56.8821	2.41012e-08	56.8679	6.51509e-08	56.8679	5.9718e-08
56.9821	2.62374e-08	56.9679	6.51509e-08	56.9679	5.9718e-08
57.0821	2.62374e-08	57.0679	6.57612e-08	57.0679	6.03283e-08
57.1821	2.68478e-08	57.1679	6.45405e-08	57.1679	5.91076e-08
57.2821	2.7153e-08	57.2679	6.57612e-08	57.2679	6.03283e-08
57.3821	2.80685e-08	57.3679	6.45405e-08	57.3679	5.91076e-08
57.4821	2.59323e-08	57.4679	6.42354e-08	57.4679	5.88024e-08
57.5821	2.74581e-08	57.5679	6.51509e-08	57.5679	5.9718e-08
57.6821	2.77633e-08	57.6679	6.48457e-08	57.6679	5.94128e-08
57.7821	2.68478e-08	57.7679	6.48457e-08	57.7679	5.94128e-08
57.8821	2.77633e-08	57.8679	6.30147e-08	57.8679	5.75817e-08
57.9821	2.86788e-08	57.9679	6.39302e-08	57.9679	5.84972e-08
58.0821	2.83737e-08	58.0679	6.33198e-08	58.0679	5.78869e-08
58.1821	2.83737e-08	58.1679	6.54561e-08	58.1679	6.00231e-08
58.2821	3.08151e-08	58.2679	6.60664e-08	58.2679	6.06335e-08
58.3821	3.08151e-08	58.3679	6.72871e-08	58.3679	6.18542e-08
58.4821	3.02047e-08	58.4679	6.63716e-08	58.4679	6.09387e-08
58.5821	3.17306e-08	58.5679	6.63716e-08	58.5679	6.09387e-08
58.6821	3.05099e-08	58.6679	6.51509e-08	58.6679	5.9718e-08
58.7821	2.95944e-08	58.7679	6.51509e-08	58.7679	5.9718e-08
58.8821	2.95944e-08	58.8679	6.48457e-08	58.8679	5.94128e-08
58.9821	3.02047e-08	58.9679	6.14888e-08	58.9679	5.60558e-08
59.0821	2.98996e-08	59.0679	6.1794e-08	59.0679	5.6361e-08
59.1821	3.11203e-08	59.1679	6.11836e-08	59.1679	5.57507e-08
59.2821	3.11203e-08	59.2679	5.87422e-08	59.2679	5.33093e-08
59.3821	3.05099e-08	59.3679	5.96577e-08	59.3679	5.42248e-08
59.4821	3.02047e-08	59.4679	5.96577e-08	59.4679	5.42248e-08
59.5821	2.92892e-08	59.5679	5.72163e-08	59.5679	5.17834e-08
59.6821	2.83737e-08	59.6679	5.96577e-08	59.6679	5.42248e-08
59.7821	2.92892e-08	59.7679	5.96577e-08	59.7679	5.42248e-08
59.8821	2.92892e-08	59.8679	5.81318e-08	59.8679	5.26989e-08
59.9821	2.86788e-08	59.9679	5.72163e-08	59.9679	5.17834e-08
60.0821	2.68478e-08	60.0679	5.69111e-08	60.0679	5.14782e-08
60.1821	2.74581e-08	60.1679	5.72163e-08	60.1679	5.17834e-08
60.2821	2.7153e-08	60.2679	5.59956e-08	60.2679	5.05627e-08
60.3821	2.7153e-08	60.3679	5.6606e-08	60.3679	5.1173e-08
60.4821	2.74581e-08	60.4679	5.63008e-08	60.4679	5.08679e-08
60.5821	2.74581e-08	60.5679	5.50801e-08	60.5679	4.96472e-08
60.6821	2.7153e-08	60.6679	5.63008e-08	60.6679	5.08679e-08
60.7821	2.74581e-08	60.7679	5.44697e-08	60.7679	4.90368e-08
60.8821	2.68478e-08	60.8679	5.53853e-08	60.8679	4.99523e-08
60.9821	2.7153e-08	60.9679	5.50801e-08	60.9679	4.96472e-08
61.0821	2.74581e-08	61.0679	5.35542e-08	61.0679	4.81213e-08
61.1821	2.74581e-08	61.1679	5.47749e-08	61.1679	4.9342e-08
61.2821	2.92892e-08	61.2679	5.17232e-08	61.2679	4.62902e-08
61.3821	2.8984e-08	61.3679	5.20283e-08	61.3679	4.65954e-08
61.4821	2.98996e-08	61.4679	5.26387e-08	61.4679	4.72057e-08
61.5821	2.83737e-08	61.5679	5.01973e-08	61.5679	4.47643e-08
61.6821	3.02047e-08	61.6679	4.89766e-08	61.6679	4.35436e-08
61.7821	2.83737e-08	61.7679	4.89766e-08	61.7679	4.35436e-08
61.8821	2.74581e-08	61.8679	4.92817e-08	61.8679	4.38488e-08
61.9821	2.7153e-08	61.9679	4.92817e-08	61.9679	4.38488e-08
62.0821	2.7153e-08	62.0679	4.77559e-08	62.0679	4.23229e-08
62.1821	2.65426e-08	62.1679	4.89766e-08	62.1679	4.35436e-08
62.2821	2.7153e-08	62.2679	4.83662e-08	62.2679	4.29333e-08
62.3821	2.59323e-08	62.3679	4.83662e-08	62.3679	4.29333e-08
62.4821	2.65426e-08	62.4679	4.77559e-08	62.4679	4.23229e-08
62.5821	2.47116e-08	62.5679	4.77559e-08	62.5679	4.23229e-08
62.6821	2.59323e-08	62.6679	4.74507e-08	62.6679	4.20178e-08
62.7821	2.65426e-08	62.7679	4.74507e-08	62.7679	4.20178e-08
62.8821	2.74581e-08	62.8679	4.74507e-08	62.8679	4.20178e-08
62.9821	2.77633e-08	62.9679	4.8061e-08	62.9679	4.26281e-08
63.0821	2.7153e-08	63.0679	4.68403e-08	63.0679	4.14074e-08
63.1821	2.86788e-08	63.1679	4.77559e-08	63.1679	4.23229e-08
63.2821	2.68478e-08	63.2679	4.92817e-08	63.2679	4.38488e-08
63.3821	2.65426e-08	63.3679	4.8061e-08	63.3679	4.26281e-08
63.4821	2.7153e-08	63.4679	4.92817e-08	63.4679	4.38488e-08
63.5821	2.62374e-08	63.5679	4.92817e-08	63.5679	4.38488e-08
63.6821	2.50167e-08	63.6679	4.8061e-08	63.6679	4.26281e-08
63.7821	2.50167e-08	63.7679	4.83662e-08	63.7679	4.29333e-08
63.8821	2.50167e-08	63.8679	4.92817e-08	63.8679	4.38488e-08
63.9821	2.50167e-08	63.9679	4.74507e-08	63.9679	4.20178e-08
64.0821	2.44064e-08	64.0679	4.74507e-08	64.0679	4.20178e-08
64.1821	2.31857e-08	64.1679	4.623e-08	64.1679	4.07971e-08
64.2821	2.44064e-08	64.2679	4.59248e-08	64.2679	4.04919e-08
64.3821	2.41012e-08	64.3679	4.65352e-08	64.3679	4.11022e-08
64.4821	2.31857e-08	64.4679	4.623e-08	64.4679	4.07971e-08
64.5821	2.41012e-08	64.5679	4.77559e-08	64.5679	4.23229e-08
64.6821	2.31857e-08	64.6679	4.8061e-08	64.6679	4.26281e-08
64.7821	2.31857e-08	64.7679	4.71455e-08	64.7679	4.17126e-08
64.8821	2.25753e-08	64.8679	4.74507e-08	64.8679	4.20178e-08
64.9821	2.28805e-08	64.9679	4.71455e-08	64.9679	4.17126e-08
65.0821	2.28805e-08	65.0679	4.71455e-08	65.0679	4.17126e-08
65.1821	2.28805e-08	65.1679	4.8061e-08	65.1679	4.26281e-08
65.2821	2.28805e-08	65.2679	4.59248e-08	65.2679	4.04919e-08
65.3821	2.25753e-08	65.3679	4.47041e-08	65.3679	3.92712e-08
65.4821	2.1965e-08	65.4679	4.37886e-08	65.4679	3.83556e-08
65.5821	2.1965e-08	65.5679	4.25679e-08	65.5679	3.71349e-08
65.6821	2.16598e-08	65.6679	4.28731e-08	65.6679	3.74401e-08
65.7821	2.28805e-08	65.7679	4.34834e-08	65.7679	3.80505e-08
65.8821	2.28805e-08	65.8679	4.37886e-08	65.8679	3.83556e-08
65.9821	2.31857e-08	65.9679	4.31782e-08	65.9679	3.77453e-08
66.0821	2.41012e-08	66.0679	4.25679e-08	66.0679	3.71349e-08
66.1821	2.34909e-08	66.1679	4.16524e-08	66.1679	3.62194e-08
66.2821	2.47116e-08	66.2679	4.28731e-08	66.2679	3.74401e-08
66.3821	2.53219e-08	66.3679	4.28731e-08	66.3679	3.74401e-08
66.4821	2.41012e-08	66.4679	4.40938e-08	66.4679	3.86608e-08
66.5821	2.25753e-08	66.5679	4.37886e-08	66.5679	3.83556e-08
66.6821	2.34909e-08	66.6679	4.40938e-08	66.6679	3.86608e-08
66.7821	2.28805e-08	66.7679	4.43989e-08	66.7679	3.8966e-08
66.8821	2.34909e-08	66.8679	4.53145e-08	66.8679	3.98815e-08
66.9821	2.47116e-08	66.9679	4.37886e-08	66.9679	3.83556e-08
67.0821	2.41012e-08	67.0679	4.34834e-08	67.0679	3.80505e-08
67.1821	2.3796e-08	67.1679	4.47041e-08	67.1679	3.92712e-08
67.2821	2.44064e-08	67.2679	4.37886e-08	67.2679	3.83556e-08
67.3821	2.28805e-08	67.3679	4.40938e-08	67.3679	3.86608e-08
67.4821	2.34909e-08	67.4679	4.16524e-08	67.4679	3.62194e-08
67.5821	2.31857e-08	67.5679	4.25679e-08	67.5679	3.71349e-08
67.6821	2.1965e-08	67.6679	4.25679e-08	67.6679	3.71349e-08
67.7821	2.25753e-08	67.7679	4.19575e-08	67.7679	3.65246e-08
67.8821	2.04391e-08	67.8679	3.92109e-08	67.8679	3.3778e-08
67.9821	2.01339e-08	67.9679	4.01265e-08	67.9679	3.46935e-08
68.0821	2.07443e-08	68.0679	4.04317e-08	68.0679	3.49987e-08
68.1821	2.07443e-08	68.1679	4.04317e-08	68.1679	3.49987e-08
68.2821	2.01339e-08	68.2679	3.89058e-08	68.2679	3.34728e-08
68.3821	2.01339e-08	68.3679	3.95161e-08	68.3679	3.40832e-08
68.4821	1.92184e-08	68.4679	3.82954e-08	68.4679	3.28625e-08
68.5821	2.01339e-08	68.5679	3.73799e-08	68.5679	3.1947e-08
68.6821	2.01339e-08	68.6679	3.76851e-08	68.6679	3.22521e-08
68.7821	1.92184e-08	68.7679	3.73799e-08	68.7679	3.1947e-08
68.8821	1.76925e-08	68.8679	3.64644e-08	68.8679	3.10314e-08
68.9821	1.73873e-08	68.9679	3.67695e-08	68.9679	3.13366e-08
69.0821	1.83029e-08	69.0679	3.70747e-08	69.0679	3.16418e-08
69.1821	1.89132e-08	69.1679	3.70747e-08	69.1679	3.16418e-08
69.2821	1.70822e-08	69.2679	3.61592e-08	69.2679	3.07263e-08
69.3821	1.79977e-08	69.3679	3.70747e-08	69.3679	3.16418e-08
69.4821	1.70822e-08	69.4679	3.67695e-08	69.4679	3.13366e-08
69.5821	1.6777e-08	69.5679	3.64644e-08	69.5679	3.10314e-08
69.6821	1.61666e-08	69.6679	3.55488e-08	69.6679	3.01159e-08
69.7821	1.64718e-08	69.7679	3.43281e-08	69.7679	2.88952e-08
69.8821	1.70822e-08	69.8679	3.37178e-08	69.8679	2.82848e-08
69.9821	1.79977e-08	69.9679	3.21919e-08	69.9679	2.6759e-08
70.0821	1.58615e-08	70.0679	3.18867e-08	70.0679	2.64538e-08
70.1821	1.61666e-08	70.1679	3.09712e-08	70.1679	2.55383e-08
70.2821	1.58615e-08	70.2679	3.18867e-08	70.2679	2.64538e-08
70.3821	1.49459e-08	70.3679	3.15816e-08	70.3679	2.61486e-08
70.4821	1.55563e-08	70.4679	3.12764e-08	70.4679	2.58434e-08
70.5821	1.61666e-08	70.5679	3.15816e-08	70.5679	2.61486e-08
70.6821	1.58615e-08	70.6679	2.94453e-08	70.6679	2.40124e-08
70.7821	1.55563e-08	70.7679	3.09712e-08	70.7679	2.55383e-08
70.8821	1.52511e-08	70.8679	3.09712e-08	70.8679	2.55383e-08
70.9821	1.52511e-08	70.9679	2.91401e-08	70.9679	2.37072e-08
71.0821	1.58615e-08	71.0679	2.94453e-08	71.0679	2.40124e-08
71.1821	1.43356e-08	71.1679	2.94453e-08	71.1679	2.40124e-08
71.2821	1.43356e-08	71.2679	2.85298e-08	71.2679	2.30969e-08
71.3821	1.46408e-08	71.3679	2.97505e-08	71.3679	2.43176e-08
71.4821	1.40304e-08	71.4679	3.00557e-08	71.4679	2.46227e-08
71.5821	1.31149e-08	71.5679	2.97505e-08	71.5679	2.43176e-08
71.6821	1.40304e-08	71.6679	3.12764e-08	71.6679	2.58434e-08
71.7821	1.37252e-08	71.7679	2.94453e-08	71.7679	2.40124e-08
71.8821	1.37252e-08	71.8679	2.97505e-08	71.8679	2.43176e-08
71.9821	1.46408e-08	71.9679	2.97505e-08	71.9679	2.43176e-08
72.0821	1.40304e-08	72.0679	3.00557e-08	72.0679	2.46227e-08
72.1821	1.37252e-08	72.1679	2.97505e-08	72.1679	2.43176e-08
72.2821	1.43356e-08	72.2679	2.97505e-08	72.2679	2.43176e-08
72.3821	1.37252e-08	72.3679	3.0666e-08	72.3679	2.52331e-08
72.4821	1.40304e-08	72.4679	3.15816e-08	72.4679	2.61486e-08
72.5821	1.37252e-08	72.5679	3.03609e-08	72.5679	2.49279e-08
72.6821	1.43356e-08	72.6679	3.18867e-08	72.6679	2.64538e-08
72.7821	1.28097e-08	72.7679	3.24971e-08	72.7679	2.70641e-08
72.8821	1.55563e-08	72.8679	3.15816e-08	72.8679	2.61486e-08
72.9821	1.40304e-08	72.9679	3.18867e-08	72.9679	2.64538e-08
73.0821	1.40304e-08	73.0679	3.21919e-08	73.0679	2.6759e-08
73.1821	1.28097e-08	73.1679	3.09712e-08	73.1679	2.55383e-08
73.2821	1.43356e-08	73.2679	3.00557e-08	73.2679	2.46227e-08
73.3821	1.37252e-08	73.3679	3.03609e-08	73.3679	2.49279e-08
73.4821	1.25045e-08	73.4679	2.8835e-08	73.4679	2.3402e-08
73.5821	1.25045e-08	73.5679	2.97505e-08	73.5679	2.43176e-08
73.6821	1.31149e-08	73.6679	3.00557e-08	73.6679	2.46227e-08
73.7821	1.28097e-08	73.7679	2.94453e-08	73.7679	2.40124e-08
73.8821	1.21994e-08	73.8679	3.0666e-08	73.8679	2.52331e-08
73.9821	1.1589e-08	73.9679	2.97505e-08	73.9679	2.43176e-08
74.0821	1.12838e-08	74.0679	3.09712e-08	74.0679	2.55383e-08
74.1821	1.09787e-08	74.1679	3.12764e-08	74.1679	2.58434e-08
74.2821	1.06735e-08	74.2679	3.15816e-08	74.2679	2.61486e-08
74.3821	1.21994e-08	74.3679	3.21919e-08	74.3679	2.6759e-08
74.4821	1.18942e-08	74.4679	3.37178e-08	74.4679	2.82848e-08
74.5821	1.12838e-08	74.5679	3.34126e-08	74.5679	2.79797e-08
74.6821	1.1589e-08	74.6679	3.18867e-08	74.6679	2.64538e-08
74.7821	1.1589e-08	74.7679	3.21919e-08	74.7679	2.6759e-08
74.8821	1.21994e-08	74.8679	3.4023e-08	74.8679	2.859e-08
74.9821	9.45277e-09	74.9679	3.21919e-08	74.9679	2.6759e-08
75.0821	1.06735e-08	75.0679	3.18867e-08	75.0679	2.64538e-08
75.1821	9.1476e-09	75.1679	3.24971e-08	75.1679	2.70641e-08
75.2821	1.00631e-08	75.2679	3.28023e-08	75.2679	2.73693e-08
75.3821	9.1476e-09	75.3679	3.46333e-08	75.3679	2.92004e-08
75.4821	9.1476e-09	75.4679	3.52437e-08	75.4679	2.98107e-08
75.5821	8.53725e-09	75.5679	3.5854e-08	75.5679	3.04211e-08
75.6821	8.23207e-09	75.6679	3.70747e-08	75.6679	3.16418e-08
75.7821	8.84242e-09	75.7679	3.86006e-08	75.7679	3.31677e-08
75.8821	9.1476e-09	75.8679	3.79902e-08	75.8679	3.25573e-08
75.9821	9.1476e-09	75.9679	3.89058e-08	75.9679	3.34728e-08
76.0821	7.62172e-09	76.0679	3.76851e-08	76.0679	3.22521e-08
76.1821	9.75795e-09	76.1679	3.64644e-08	76.1679	3.10314e-08
76.2821	8.84242e-09	76.2679	3.61592e-08	76.2679	3.07263e-08
76.3821	8.23207e-09	76.3679	3.43281e-08	76.3679	2.88952e-08
76.4821	7.92689e-09	76.4679	3.28023e-08	76.4679	2.73693e-08
76.5821	7.62172e-09	76.5679	3.34126e-08	76.5679	2.79797e-08
76.6821	8.84242e-09	76.6679	3.21919e-08	76.6679	2.6759e-08
76.7821	8.53725e-09	76.7679	3.12764e-08	76.7679	2.58434e-08
76.8821	8.23207e-09	76.8679	3.12764e-08	76.8679	2.58434e-08
76.9821	7.92689e-09	76.9679	3.09712e-08	76.9679	2.55383e-08
77.0821	6.70619e-09	77.0679	3.0666e-08	77.0679	2.52331e-08
77.1821	7.62172e-09	77.1679	3.0666e-08	77.1679	2.52331e-08
77.2821	6.40102e-09	77.2679	3.00557e-08	77.2679	2.46227e-08
77.3821	7.31654e-09	77.3679	3.09712e-08	77.3679	2.55383e-08
77.4821	7.92689e-09	77.4679	2.94453e-08	77.4679	2.40124e-08
77.5821	7.01137e-09	77.5679	2.85298e-08	77.5679	2.30969e-08
77.6821	5.79066e-09	77.6679	2.79194e-08	77.6679	2.24865e-08
77.7821	6.40102e-09	77.7679	2.60884e-08	77.7679	2.06555e-08
77.8821	7.01137e-09	77.8679	2.60884e-08	77.8679	2.06555e-08
77.9821	6.40102e-09	77.9679	2.73091e-08	77.9679	2.18762e-08
78.0821	6.09584e-09	78.0679	2.57832e-08	78.0679	2.03503e-08
78.1821	5.18031e-09	78.1679	2.57832e-08	78.1679	2.03503e-08
78.2821	6.40102e-09	78.2679	2.60884e-08	78.2679	2.06555e-08
78.3821	6.40102e-09	78.3679	2.60884e-08	78.3679	2.06555e-08
78.4821	6.09584e-09	78.4679	2.5478e-08	78.4679	2.00451e-08
78.5821	5.18031e-09	78.5679	2.45625e-08	78.5679	1.91296e-08
78.6821	4.87514e-09	78.6679	2.3647e-08	78.6679	1.8214e-08
78.7821	5.48549e-09	78.7679	2.39522e-08	78.7679	1.85192e-08
78.8821	5.48549e-09	78.8679	2.3647e-08	78.8679	1.8214e-08
78.9821	5.79066e-09	78.9679	2.42573e-08	78.9679	1.88244e-08
79.0821	5.18031e-09	79.0679	2.39522e-08	79.0679	1.85192e-08
79.1821	4.87514e-09	79.1679	2.45625e-08	79.1679	1.91296e-08
79.2821	4.87514e-09	79.2679	2.45625e-08	79.2679	1.91296e-08
79.3821	6.09584e-09	79.3679	2.39522e-08	79.3679	1.85192e-08
79.4821	6.40102e-09	79.4679	2.45625e-08	79.4679	1.91296e-08
79.5821	4.56996e-09	79.5679	2.39522e-08	79.5679	1.85192e-08
79.6821	6.70619e-09	79.6679	2.45625e-08	79.6679	1.91296e-08
79.7821	7.62172e-09	79.7679	2.42573e-08	79.7679	1.88244e-08
79.8821	7.62172e-09	79.8679	2.60884e-08	79.8679	2.06555e-08
79.9821	7.01137e-09	79.9679	2.60884e-08	79.9679	2.06555e-08
80.0821	7.01137e-09	80.0679	2.73091e-08	80.0679	2.18762e-08
80.1821	8.53725e-09	80.1679	2.79194e-08	80.1679	2.24865e-08
80.2821	8.84242e-09	80.2679	2.70039e-08	80.2679	2.1571e-08
80.3821	7.92689e-09	80.3679	2.70039e-08	80.3679	2.1571e-08
80.4821	8.53725e-09	80.4679	2.66987e-08	80.4679	2.12658e-08
80.5821	8.23207e-09	80.5679	2.73091e-08	80.5679	2.18762e-08
80.6821	7.01137e-09	80.6679	2.76143e-08	80.6679	2.21813e-08
80.7821	7.31654e-09	80.7679	2.82246e-08	80.7679	2.27917e-08
80.8821	6.70619e-09	80.8679	2.82246e-08	80.8679	2.27917e-08
80.9821	6.40102e-09	80.9679	2.8835e-08	80.9679	2.3402e-08
81.0821	5.18031e-09	81.0679	2.8835e-08	81.0679	2.3402e-08
81.1821	5.48549e-09	81.1679	2.79194e-08	81.1679	2.24865e-08
81.2821	5.48549e-09	81.2679	2.85298e-08	81.2679	2.30969e-08
81.3821	4.87514e-09	81.3679	2.82246e-08	81.3679	2.27917e-08
81.4821	3.65443e-09	81.4679	2.73091e-08	81.4679	2.18762e-08
81.5821	3.65443e-09	81.5679	2.8835e-08	81.5679	2.3402e-08
81.6821	4.87514e-09	81.6679	2.63936e-08	81.6679	2.09606e-08
81.7821	4.26478e-09	81.7679	2.66987e-08	81.7679	2.12658e-08
81.8821	3.65443e-09	81.8679	2.63936e-08	81.8679	2.09606e-08
81.9821	3.04408e-09	81.9679	2.57832e-08	81.9679	2.03503e-08
82.0821	3.95961e-09	82.0679	2.39522e-08	82.0679	1.85192e-08
82.1821	2.73891e-09	82.1679	2.5478e-08	82.1679	2.00451e-08
82.2821	2.73891e-09	82.2679	2.45625e-08	82.2679	1.91296e-08
82.3821	3.04408e-09	82.3679	2.42573e-08	82.3679	1.88244e-08
82.4821	3.04408e-09	82.4679	2.3647e-08	82.4679	1.8214e-08
82.5821	3.34926e-09	82.5679	2.39522e-08	82.5679	1.85192e-08
82.6821	2.73891e-09	82.6679	2.33418e-08	82.6679	1.79089e-08
82.7821	2.12855e-09	82.7679	2.24263e-08	82.7679	1.69933e-08
82.8821	2.73891e-09	82.8679	2.15108e-08	82.8679	1.60778e-08
82.9821	2.73891e-09	82.9679	2.24263e-08	82.9679	1.69933e-08
83.0821	2.43373e-09	83.0679	2.18159e-08	83.0679	1.6383e-08
83.1821	2.12855e-09	83.1679	2.05952e-08	83.1679	1.51623e-08
83.2821	9.07851e-10	83.2679	1.90693e-08	83.2679	1.36364e-08
83.3821	1.21303e-09	83.3679	1.90693e-08	83.3679	1.36364e-08
83.4821	2.43373e-09	83.4679	1.75435e-08	83.4679	1.21105e-08
83.5821	2.12855e-09	83.5679	1.90693e-08	83.5679	1.36364e-08
83.6821	1.5182e-09	83.6679	1.93745e-08	83.6679	1.39416e-08
83.7821	1.5182e-09	83.7679	1.99849e-08	83.7679	1.45519e-08
83.8821	2.12855e-09	83.8679	1.99849e-08	83.8679	1.45519e-08
83.9821	9.07851e-10	83.9679	1.87642e-08	83.9679	1.33312e-08
84.0821	1.5182e-09	84.0679	1.78486e-08	84.0679	1.24157e-08
84.1821	2.975e-10	84.1679	1.93745e-08	84.1679	1.39416e-08
84.2821	1.21303e-09	84.2679	1.99849e-08	84.2679	1.45519e-08
84.3821	-7.67628e-12	84.3679	2.05952e-08	84.3679	1.51623e-08
84.4821	2.975e-10	84.4679	1.93745e-08	84.4679	1.39416e-08
84.5821	-9.23204e-10	84.5679	1.96797e-08	84.5679	1.42468e-08
84.6821	-7.67628e-12	84.6679	2.12056e-08	84.6679	1.57726e-08
84.7821	2.975e-10	84.7679	2.12056e-08	84.7679	1.57726e-08
84.8821	6.02675e-10	84.8679	2.12056e-08	84.8679	1.57726e-08
84.9821	-9.23204e-10	84.9679	2.09004e-08	84.9679	1.54675e-08
85.0821	-6.18028e-10	85.0679	2.029e-08	85.0679	1.48571e-08
85.1821	-1.22838e-09	85.1679	1.96797e-08	85.1679	1.42468e-08
85.2821	-7.67628e-12	85.2679	2.09004e-08	85.2679	1.54675e-08
85.3821	-9.23204e-10	85.3679	2.029e-08	85.3679	1.48571e-08
85.4821	-1.22838e-09	85.4679	1.90693e-08	85.4679	1.36364e-08
85.5821	-6.18028e-10	85.5679	2.029e-08	85.5679	1.48571e-08
85.6821	-3.12852e-10	85.6679	1.99849e-08	85.6679	1.45519e-08
85.7821	-1.22838e-09	85.7679	1.90693e-08	85.7679	1.36364e-08
85.8821	-9.23204e-10	85.8679	2.09004e-08	85.8679	1.54675e-08
85.9821	-1.83873e-09	85.9679	2.05952e-08	85.9679	1.51623e-08
86.0821	-1.53356e-09	86.0679	1.99849e-08	86.0679	1.45519e-08
86.1821	-1.53356e-09	86.1679	1.75435e-08	86.1679	1.21105e-08
86.2821	-1.22838e-09	86.2679	1.69331e-08	86.2679	1.15002e-08
86.3821	-2.14391e-09	86.3679	1.57124e-08	86.3679	1.02795e-08
86.4821	-2.44908e-09	86.4679	1.60176e-08	86.4679	1.05847e-08
86.5821	-9.23204e-10	86.5679	1.54072e-08	86.5679	9.9743e-09
86.6821	-1.22838e-09	86.6679	1.38814e-08	86.6679	8.44842e-09
86.7821	-2.44908e-09	86.7679	1.38814e-08	86.7679	8.44842e-09
86.8821	-1.83873e-09	86.8679	1.23555e-08	86.8679	6.92254e-09
86.9821	-9.23204e-10	86.9679	1.144e-08	86.9679	6.00701e-09
87.0821	-3.66979e-09	87.0679	1.20503e-08	87.0679	6.61737e-09
87.1821	-9.23204e-10	87.1679	1.20503e-08	87.1679	6.61737e-09
87.2821	-1.83873e-09	87.2679	1.29658e-08	87.2679	7.53289e-09
87.3821	-1.83873e-09	87.3679	1.26607e-08	87.3679	7.22772e-09
87.4821	-1.53356e-09	87.4679	1.26607e-08	87.4679	7.22772e-09
87.5821	-2.14391e-09	87.5679	1.17451e-08	87.5679	6.31219e-09
87.6821	-1.83873e-09	87.6679	1.144e-08	87.6679	6.00701e-09
87.7821	-3.36461e-09	87.7679	1.11348e-08	87.7679	5.70184e-09
87.8821	-2.44908e-09	87.8679	1.11348e-08	87.8679	5.70184e-09
87.9821	-3.05943e-09	87.9679	1.17451e-08	87.9679	6.31219e-09
88.0821	-2.44908e-09	88.0679	1.20503e-08	88.0679	6.61737e-09
88.1821	-2.14391e-09	88.1679	1.144e-08	88.1679	6.00701e-09
88.2821	-2.44908e-09	88.2679	1.144e-08	88.2679	6.00701e-09
88.3821	-3.97496e-09	88.3679	1.20503e-08	88.3679	6.61737e-09
88.4821	-3.36461e-09	88.4679	1.17451e-08	88.4679	6.31219e-09
88.5821	-2.75426e-09	88.5679	1.17451e-08	88.5679	6.31219e-09
88.6821	-3.05943e-09	88.6679	1.17451e-08	88.6679	6.31219e-09
88.7821	-3.05943e-09	88.7679	1.26607e-08	88.7679	7.22772e-09
88.8821	-3.36461e-09	88.8679	1.17451e-08	88.8679	6.31219e-09
88.9821	-3.36461e-09	88.9679	1.3271e-08	88.9679	7.83807e-09
89.0821	-1.83873e-09	89.0679	1.26607e-08	89.0679	7.22772e-09
89.1821	-3.36461e-09	89.1679	1.23555e-08	89.1679	6.92254e-09
89.2821	-3.05943e-09	89.2679	1.144e-08	89.2679	6.00701e-09
89.3821	-3.05943e-09	89.3679	1.11348e-08	89.3679	5.70184e-09
89.4821	-2.75426e-09	89.4679	1.144e-08	89.4679	6.00701e-09
89.5821	-2.75426e-09	89.5679	1.08296e-08	89.5679	5.39666e-09
89.6821	-3.05943e-09	89.6679	9.91407e-09	89.6679	4.48114e-09
89.7821	-4.58531e-09	89.7679	8.69337e-09	89.7679	3.26043e-09
89.8821	-2.75426e-09	89.8679	9.6089e-09	89.8679	4.17596e-09
89.9821	-3.66979e-09	89.9679	8.99855e-09	89.9679	3.56561e-09
90.0821	-3.66979e-09	90.0679	9.91407e-09	90.0679	4.48114e-09
90.1821	-4.58531e-09	90.1679	9.91407e-09	90.1679	4.48114e-09
90.2821	-3.36461e-09	90.2679	9.91407e-09	90.2679	4.48114e-09
90.3821	-3.97496e-09	90.3679	1.17451e-08	90.3679	6.31219e-09
90.4821	-2.44908e-09	90.4679	1.08296e-08	90.4679	5.39666e-09
90.5821	-4.28014e-09	90.5679	8.99855e-09	90.5679	3.56561e-09
90.6821	-4.89049e-09	90.6679	8.38819e-09	90.6679	2.95526e-09
90.7821	-4.89049e-09	90.7679	6.86232e-09	90.7679	1.42938e-09
90.8821	-3.36461e-09	90.8679	5.64161e-09	90.8679	2.08675e-10
90.9821	-5.19566e-09	90.9679	5.03126e-09	90.9679	-4.01677e-10
91.0821	-3.97496e-09	91.0679	3.50538e-09	91.0679	-1.92756e-09
91.1821	-4.28014e-09	91.1679	4.42091e-09	91.1679	-1.01203e-09
91.2821	-3.66979e-09	91.2679	4.11573e-09	91.2679	-1.3172e-09
91.3821	-3.97496e-09	91.3679	5.33644e-09	91.3679	-9.65007e-11
91.4821	-4.58531e-09	91.4679	4.42091e-09	91.4679	-1.01203e-09
91.5821	-3.97496e-09	91.5679	3.20021e-09	91.5679	-2.23273e-09
91.6821	-3.97496e-09	91.6679	5.03126e-09	91.6679	-4.01677e-10
91.7821	-4.28014e-09	91.7679	3.20021e-09	91.7679	-2.23273e-09
91.8821	-5.19566e-09	91.8679	5.33644e-09	91.8679	-9.65007e-11
91.9821	-4.89049e-09	91.9679	3.81056e-09	91.9679	-1.62238e-09
92.0821	-6.41637e-09	92.0679	3.20021e-09	92.0679	-2.23273e-09
92.1821	-6.72154e-09	92.1679	3.50538e-09	92.1679	-1.92756e-09
92.2821	-5.50084e-09	92.2679	2.58985e-09	92.2679	-2.84308e-09
92.3821	-6.11119e-09	92.3679	2.58985e-09	92.3679	-2.84308e-09
92.4821	-5.80602e-09	92.4679	3.20021e-09	92.4679	-2.23273e-09
92.5821	-5.80602e-09	92.5679	2.89503e-09	92.5679	-2.53791e-09
92.6821	-6.72154e-09	92.6679	4.42091e-09	92.6679	-1.01203e-09
92.7821	-5.80602e-09	92.7679	3.50538e-09	92.7679	-1.92756e-09
92.8821	-5.50084e-09	92.8679	2.89503e-09	92.8679	-2.53791e-09
92.9821	-7.63707e-09	92.9679	1.67433e-09	92.9679	-3.75861e-09
93.0821	-6.41637e-09	93.0679	2.28468e-09	93.0679	-3.14826e-09
93.1821	-6.41637e-09	93.1679	1.48448e-10	93.1679	-5.28449e-09
93.2821	-7.3319e-09	93.2679	1.06398e-09	93.2679	-4.36896e-09
93.3821	-7.02672e-09	93.3679	2.58985e-09	93.3679	-2.84308e-09
93.4821	-7.63707e-09	93.4679	1.06398e-09	93.4679	-4.36896e-09
93.5821	-6.72154e-09	93.5679	1.36915e-09	93.5679	-4.06379e-09
93.6821	-7.63707e-09	93.6679	7.588e-10	93.6679	-4.67414e-09
93.7821	-7.02672e-09	93.7679	1.67433e-09	93.7679	-3.75861e-09
93.8821	-7.02672e-09	93.8679	1.36915e-09	93.8679	-4.06379e-09
93.9821	-7.3319e-09	93.9679	2.28468e-09	93.9679	-3.14826e-09
94.0821	-6.72154e-09	94.0679	2.28468e-09	94.0679	-3.14826e-09
94.1821	-7.94225e-09	94.1679	4.53624e-10	94.1679	-4.97931e-09
94.2821	-7.63707e-09	94.2679	1.36915e-09	94.2679	-4.06379e-09
94.3821	-7.94225e-09	94.3679	2.28468e-09	94.3679	-3.14826e-09
94.4821	-7.94225e-09	94.4679	1.06398e-09	94.4679	-4.36896e-09
94.5821	-8.24742e-09	94.5679	2.58985e-09	94.5679	-2.84308e-09
94.6821	-8.5526e-09	94.6679	1.36915e-09	94.6679	-4.06379e-09
94.7821	-7.94225e-09	94.7679	1.67433e-09	94.7679	-3.75861e-09
94.8821	-7.63707e-09	94.8679	1.36915e-09	94.8679	-4.06379e-09
94.9821	-7.3319e-09	94.9679	4.53624e-10	94.9679	-4.97931e-09
95.0821	-7.94225e-09	95.0679	2.58985e-09	95.0679	-2.84308e-09
95.1821	-6.41637e-09	95.1679	3.50538e-09	95.1679	-1.92756e-09
95.2821	-7.94225e-09	95.2679	3.81056e-09	95.2679	-1.62238e-09
95.3821	-7.63707e-09	95.3679	2.28468e-09	95.3679	-3.14826e-09
95.4821	-6.11119e-09	95.4679	1.9795e-09	95.4679	-3.45343e-09
95.5821	-6.72154e-09	95.5679	1.9795e-09	95.5679	-3.45343e-09
95.6821	-8.5526e-09	95.6679	2.58985e-09	95.6679	-2.84308e-09
95.7821	-7.94225e-09	95.7679	1.36915e-09	95.7679	-4.06379e-09
95.8821	-8.24742e-09	95.8679	4.53624e-10	95.8679	-4.97931e-09
95.9821	-7.94225e-09	95.9679	1.67433e-09	95.9679	-3.75861e-09
96.0821	-8.85777e-09	96.0679	3.20021e-09	96.0679	-2.23273e-09
96.1821	-8.24742e-09	96.1679	4.11573e-09	96.1679	-1.3172e-09
96.2821	-7.63707e-09	96.2679	2.58985e-09	96.2679	-2.84308e-09
96.3821	-8.5526e-09	96.3679	2.28468e-09	96.3679	-3.14826e-09
96.4821	-9.16295e-09	96.4679	1.06398e-09	96.4679	-4.36896e-09
96.5821	-8.24742e-09	96.5679	2.58985e-09	96.5679	-2.84308e-09
96.6821	-8.24742e-09	96.6679	2.28468e-09	96.6679	-3.14826e-09
96.7821	-8.85777e-09	96.7679	1.67433e-09	96.7679	-3.75861e-09
96.8821	-8.5526e-09	96.8679	1.36915e-09	96.8679	-4.06379e-09
96.9821	-7.02672e-09	96.9679	1.48448e-10	96.9679	-5.28449e-09
97.0821	-7.94225e-09	97.0679	-1.07225e-09	97.0679	-6.50519e-09
97.1821	-8.5526e-09	97.1679	-1.68261e-09	97.1679	-7.11554e-09
97.2821	-8.5526e-09	97.2679	-1.07225e-09	97.2679	-6.50519e-09
97.3821	-7.63707e-09	97.3679	-1.37743e-09	97.3679	-6.81037e-09
97.4821	-8.5526e-09	97.4679	-1.56728e-10	97.4679	-5.58966e-09
97.5821	-9.16295e-09	97.5679	-2.29296e-09	97.5679	-7.7259e-09
97.6821	-8.24742e-09	97.6679	-1.98778e-09	97.6679	-7.42072e-09
97.7821	-8.5526e-09	97.7679	-2.90331e-09	97.7679	-8.33625e-09
97.8821	-8.24742e-09	97.8679	-3.81884e-09	97.8679	-9.25177e-09
97.9821	-8.5526e-09	97.9679	-3.51366e-09	97.9679	-8.9466e-09
98.0821	-8.85777e-09	98.0679	-5.03954e-09	98.0679	-1.04725e-08
98.1821	-7.94225e-09	98.1679	-4.73436e-09	98.1679	-1.01673e-08
98.2821	-8.5526e-09	98.2679	-5.64989e-09	98.2679	-1.10828e-08
98.3821	-1.03837e-08	98.3679	-5.64989e-09	98.3679	-1.10828e-08
98.4821	-9.16295e-09	98.4679	-6.87059e-09	98.4679	-1.23035e-08
98.5821	-9.7733e-09	98.5679	-7.48095e-09	98.5679	-1.29139e-08
98.6821	-1.12992e-08	98.6679	-7.78612e-09	98.6679	-1.32191e-08
98.7821	-1.03837e-08	98.7679	-8.70165e-09	98.7679	-1.41346e-08
98.8821	-1.12992e-08	98.8679	-8.70165e-09	98.8679	-1.41346e-08
98.9821	-1.06888e-08	98.9679	-7.78612e-09	98.9679	-1.32191e-08
99.0821	-1.19095e-08	99.0679	-7.78612e-09	99.0679	-1.32191e-08
99.1821	-1.00785e-08	99.1679	-5.95507e-09	99.1679	-1.1388e-08
99.2821	-1.22147e-08	99.2679	-6.26024e-09	99.2679	-1.16932e-08
99.3821	-1.16044e-08	99.3679	-5.95507e-09	99.3679	-1.1388e-08
99.4821	-1.0994e-08	99.4679	-5.03954e-09	99.4679	-1.04725e-08
99.5821	-1.16044e-08	99.5679	-4.42919e-09	99.5679	-9.86213e-09
99.6821	-1.16044e-08	99.6679	-3.81884e-09	99.6679	-9.25177e-09
99.7821	-1.12992e-08	99.7679	-5.64989e-09	99.7679	-1.10828e-08
99.8821	-1.0994e-08	99.8679	-3.51366e-09	99.8679	-8.9466e-09
99.9821	-1.22147e-08	99.9679	-3.81884e-09	99.9679	-9.25177e-09
100.082	-1.16044e-08	100.068	-5.64989e-09	100.068	-1.10828e-08
100.182	6.02675e-10	100.168	-5.64989e-09	100.168	-1.10828e-08
100.282	1.46408e-08	100.268	4.53624e-10	100.268	-4.97931e-09
100.382	2.1965e-08	100.368	2.30366e-08	100.368	1.76037e-08
100.482	2.80685e-08	100.468	3.15816e-08	100.468	2.61486e-08
100.582	3.20358e-08	100.568	3.95161e-08	100.568	3.40832e-08
100.682	3.78341e-08	100.668	4.28731e-08	100.668	3.74401e-08
100.782	4.30221e-08	100.768	4.65352e-08	100.768	4.11022e-08
100.882	4.54635e-08	100.868	5.20283e-08	100.868	4.65954e-08
100.982	4.9736e-08	100.968	5.41646e-08	100.968	4.87316e-08
101.082	5.40084e-08	101.068	5.81318e-08	101.068	5.26989e-08
101.182	5.6755e-08	101.168	6.02681e-08	101.168	5.48351e-08
101.282	6.07223e-08	101.268	6.3625e-08	101.268	5.81921e-08
101.382	6.31637e-08	101.368	6.63716e-08	101.368	6.09387e-08
101.482	6.49948e-08	101.468	6.72871e-08	101.468	6.18542e-08
101.582	6.89621e-08	101.568	7.00337e-08	101.568	6.46008e-08
101.682	7.04879e-08	101.668	7.36958e-08	101.668	6.82629e-08
101.782	7.26242e-08	101.768	7.5832e-08	101.768	7.03991e-08
101.882	7.38449e-08	101.868	7.70527e-08	101.868	7.16198e-08
101.982	7.35397e-08	101.968	8.34614e-08	101.968	7.80285e-08
102.082	7.56759e-08	102.068	8.83442e-08	102.068	8.29113e-08
102.182	7.9338e-08	102.168	9.07857e-08	102.168	8.53527e-08
102.282	8.02536e-08	102.268	9.44478e-08	102.268	8.90148e-08
102.382	8.14743e-08	102.368	9.59736e-08	102.368	9.05407e-08
102.482	8.42208e-08	102.468	9.74995e-08	102.468	9.20666e-08
102.582	8.54415e-08	102.568	9.90254e-08	102.568	9.35925e-08
102.682	8.72726e-08	102.668	1.02382e-07	102.668	9.69494e-08
102.782	8.84933e-08	102.768	1.04213e-07	102.768	9.87805e-08
102.882	9.15451e-08	102.868	1.03603e-07	102.868	9.81701e-08
102.982	9.27658e-08	102.968	1.03298e-07	102.968	9.78649e-08
103.082	9.42916e-08	103.068	1.04519e-07	103.068	9.90856e-08
103.182	9.52072e-08	103.168	1.08181e-07	103.168	1.02748e-07
103.282	9.61227e-08	103.268	1.13063e-07	103.268	1.07631e-07
103.382	9.6733e-08	103.368	1.12148e-07	103.368	1.06715e-07
103.482	9.79537e-08	103.468	1.12148e-07	103.468	1.06715e-07
103.582	9.82589e-08	103.568	1.1642e-07	103.568	1.10987e-07
103.682	9.85641e-08	103.668	1.1581e-07	103.668	1.10377e-07
103.782	9.94796e-08	103.768	1.20693e-07	103.768	1.1526e-07
103.882	1.01006e-07	103.868	1.23745e-07	103.868	1.18312e-07
103.982	1.01006e-07	103.968	1.2466e-07	103.968	1.19227e-07
104.082	1.02531e-07	104.068	1.26491e-07	104.068	1.21058e-07
104.182	1.03752e-07	104.168	1.28017e-07	104.168	1.22584e-07
104.282	1.04057e-07	104.268	1.28627e-07	104.268	1.23195e-07
104.382	1.05278e-07	104.368	1.28322e-07	104.368	1.22889e-07
104.482	1.07414e-07	104.468	1.28933e-07	104.468	1.235e-07
104.582	1.07719e-07	104.568	1.27102e-07	104.568	1.21669e-07
104.682	1.0894e-07	104.668	1.30764e-07	104.668	1.25331e-07
104.782	1.11076e-07	104.768	1.31069e-07	104.768	1.25636e-07
104.882	1.11076e-07	104.868	1.33205e-07	104.868	1.27772e-07
104.982	1.12907e-07	104.968	1.34121e-07	104.968	1.28688e-07
105.082	1.14433e-07	105.068	1.329e-07	105.068	1.27467e-07
105.182	1.15349e-07	105.168	1.32595e-07	105.168	1.27162e-07
105.282	1.16264e-07	105.268	1.35341e-07	105.268	1.29908e-07
105.382	1.18706e-07	105.368	1.37172e-07	105.368	1.31739e-07
105.482	1.19011e-07	105.468	1.38088e-07	105.468	1.32655e-07
105.582	1.19621e-07	105.568	1.39614e-07	105.568	1.34181e-07
105.682	1.20537e-07	105.668	1.4114e-07	105.668	1.35707e-07
105.782	1.21757e-07	105.768	1.4236e-07	105.768	1.36927e-07
105.882	1.22063e-07	105.868	1.43581e-07	105.868	1.38148e-07
105.982	1.23283e-07	105.968	1.42971e-07	105.968	1.37538e-07
106.082	1.23589e-07	106.068	1.44802e-07	106.068	1.39369e-07
106.182	1.24809e-07	106.168	1.46328e-07	106.168	1.40895e-07
106.282	1.2664e-07	106.268	1.49379e-07	106.268	1.43946e-07
106.382	1.29082e-07	106.368	1.51821e-07	106.368	1.46388e-07
106.482	1.27861e-07	106.468	1.52431e-07	106.468	1.46998e-07
106.582	1.30608e-07	106.568	1.56093e-07	106.568	1.5066e-07
106.682	1.31828e-07	106.668	1.5945e-07	106.668	1.54017e-07
106.782	1.31828e-07	106.768	1.60061e-07	106.768	1.54628e-07
106.882	1.33659e-07	106.868	1.61892e-07	106.868	1.56459e-07
106.982	1.3427e-07	106.968	1.64333e-07	106.968	1.589e-07
107.082	1.3488e-07	107.068	1.6708e-07	107.068	1.61647e-07
107.182	1.37321e-07	107.168	1.69521e-07	107.168	1.64088e-07
107.282	1.37627e-07	107.268	1.71657e-07	107.268	1.66224e-07
107.382	1.38542e-07	107.368	1.72573e-07	107.368	1.6714e-07
107.482	1.38542e-07	107.468	1.75014e-07	107.468	1.69581e-07
107.582	1.39152e-07	107.568	1.7654e-07	107.568	1.71107e-07
107.682	1.40373e-07	107.668	1.75625e-07	107.668	1.70192e-07
107.782	1.40984e-07	107.768	1.73793e-07	107.768	1.68361e-07
107.882	1.40678e-07	107.868	1.71352e-07	107.868	1.65919e-07
107.982	1.40373e-07	107.968	1.70437e-07	107.968	1.65004e-07
108.082	1.42204e-07	108.068	1.69826e-07	108.068	1.64393e-07
108.182	1.42815e-07	108.168	1.70742e-07	108.168	1.65309e-07
108.282	1.42815e-07	108.268	1.71352e-07	108.268	1.65919e-07
108.382	1.42509e-07	108.368	1.72573e-07	108.368	1.6714e-07
108.482	1.4434e-07	108.468	1.74404e-07	108.468	1.68971e-07
108.582	1.4434e-07	108.568	1.77761e-07	108.568	1.72328e-07
108.682	1.45866e-07	108.668	1.79287e-07	108.668	1.73854e-07
108.782	1.45866e-07	108.768	1.80813e-07	108.768	1.7538e-07
108.882	1.47697e-07	108.868	1.82033e-07	108.868	1.766e-07
108.982	1.49834e-07	108.968	1.81728e-07	108.968	1.76295e-07
109.082	1.50139e-07	109.068	1.82033e-07	109.068	1.766e-07
109.182	1.52275e-07	109.168	1.8539e-07	109.168	1.79957e-07
109.282	1.53191e-07	109.268	1.83559e-07	109.268	1.78126e-07
109.382	1.55022e-07	109.368	1.82644e-07	109.368	1.77211e-07
109.482	1.54411e-07	109.468	1.79897e-07	109.468	1.74464e-07
109.582	1.56853e-07	109.568	1.78676e-07	109.568	1.73243e-07
109.682	1.56853e-07	109.668	1.80507e-07	109.668	1.75074e-07
109.782	1.58684e-07	109.768	1.81118e-07	109.768	1.75685e-07
109.882	1.59904e-07	109.868	1.84475e-07	109.868	1.79042e-07
109.982	1.40984e-07	109.968	1.86306e-07	109.968	1.80873e-07
110.082	1.31828e-07	110.068	1.88137e-07	110.068	1.82704e-07
110.182	1.2603e-07	110.168	1.76235e-07	110.168	1.70802e-07
110.282	1.24199e-07	110.268	1.62502e-07	110.268	1.57069e-07
110.382	1.19316e-07	110.368	1.57924e-07	110.368	1.52491e-07
110.482	1.18095e-07	110.468	1.54262e-07	110.468	1.48829e-07
110.582	1.15044e-07	110.568	1.46328e-07	110.568	1.40895e-07
110.682	1.12602e-07	110.668	1.45412e-07	110.668	1.39979e-07
110.782	1.0955e-07	110.768	1.4175e-07	110.768	1.36317e-07
110.882	1.07719e-07	110.868	1.40529e-07	110.868	1.35096e-07
110.982	1.04362e-07	110.968	1.36562e-07	110.968	1.31129e-07
111.082	1.01616e-07	111.068	1.30459e-07	111.068	1.25026e-07
111.182	9.79537e-08	111.168	1.28017e-07	111.168	1.22584e-07
111.282	9.6733e-08	111.268	1.22829e-07	111.268	1.17396e-07
111.382	9.39865e-08	111.368	1.19777e-07	111.368	1.14344e-07
111.482	9.15451e-08	111.468	1.18251e-07	111.468	1.12819e-07
111.582	9.03244e-08	111.568	1.17336e-07	111.568	1.11903e-07
111.682	8.84933e-08	111.668	1.15505e-07	111.668	1.10072e-07
111.782	8.75778e-08	111.768	1.12148e-07	111.768	1.06715e-07
111.882	8.33053e-08	111.868	1.11538e-07	111.868	1.06105e-07
111.982	8.20846e-08	111.968	1.12453e-07	111.968	1.0702e-07
112.082	8.11691e-08	112.068	1.12148e-07	112.068	1.06715e-07
112.182	7.87277e-08	112.168	1.09401e-07	112.168	1.03968e-07
112.282	7.99484e-08	112.268	1.11232e-07	112.268	1.05799e-07
112.382	7.7507e-08	112.368	1.09401e-07	112.368	1.03968e-07
112.482	7.59811e-08	112.468	1.05739e-07	112.468	1.00306e-07
112.582	7.65914e-08	112.568	1.00856e-07	112.568	9.54235e-08
112.682	7.29293e-08	112.668	9.8415e-08	112.668	9.29821e-08
112.782	7.29293e-08	112.768	9.62788e-08	112.768	9.08459e-08
112.882	7.07931e-08	112.868	9.53633e-08	112.868	8.99304e-08
112.982	7.04879e-08	112.968	9.23115e-08	112.968	8.68786e-08
113.082	6.89621e-08	113.068	9.10908e-08	113.068	8.56579e-08
113.182	6.74362e-08	113.168	9.10908e-08	113.168	8.56579e-08
113.282	6.65206e-08	113.268	9.1396e-08	113.268	8.59631e-08
113.382	6.56051e-08	113.368	9.04805e-08	113.368	8.50475e-08
113.482	6.56051e-08	113.468	8.9565e-08	113.468	8.4132e-08
113.582	6.37741e-08	113.568	9.1396e-08	113.568	8.59631e-08
113.682	6.28585e-08	113.668	9.1396e-08	113.668	8.59631e-08
113.782	6.16378e-08	113.768	9.04805e-08	113.768	8.50475e-08
113.882	6.22482e-08	113.868	8.92598e-08	113.868	8.38268e-08
113.982	6.07223e-08	113.968	8.83442e-08	113.968	8.29113e-08
114.082	6.07223e-08	114.068	8.86494e-08	114.068	8.32165e-08
114.182	5.88912e-08	114.168	8.68184e-08	114.168	8.13854e-08
114.282	5.85861e-08	114.268	8.49873e-08	114.268	7.95544e-08
114.382	5.70602e-08	114.368	8.34614e-08	114.368	7.80285e-08
114.482	5.70602e-08	114.468	8.46821e-08	114.468	7.92492e-08
114.582	5.58395e-08	114.568	8.4377e-08	114.568	7.8944e-08
114.682	5.55343e-08	114.668	8.28511e-08	114.668	7.74181e-08
114.782	5.52291e-08	114.768	8.13252e-08	114.768	7.58923e-08
114.882	5.40084e-08	114.868	7.97993e-08	114.868	7.43664e-08
114.982	5.37033e-08	114.968	7.88838e-08	114.968	7.34509e-08
115.082	5.24826e-08	115.068	7.73579e-08	115.068	7.1925e-08
115.182	5.12619e-08	115.168	7.67476e-08	115.168	7.13146e-08
115.282	5.27877e-08	115.268	7.49165e-08	115.268	6.94836e-08
115.382	5.21774e-08	115.368	7.24751e-08	115.368	6.70422e-08
115.482	5.09567e-08	115.468	7.24751e-08	115.468	6.70422e-08
115.582	4.9736e-08	115.568	7.09492e-08	115.568	6.55163e-08
115.682	4.94308e-08	115.668	7.18648e-08	115.668	6.64318e-08
115.782	4.75997e-08	115.768	7.09492e-08	115.768	6.55163e-08
115.882	4.82101e-08	115.868	6.94234e-08	115.868	6.39904e-08
115.982	4.85153e-08	115.968	7.06441e-08	115.968	6.52111e-08
116.082	4.75997e-08	116.068	7.00337e-08	116.068	6.46008e-08
116.182	4.69894e-08	116.168	6.8813e-08	116.168	6.33801e-08
116.282	4.69894e-08	116.268	7.06441e-08	116.268	6.52111e-08
116.382	4.60739e-08	116.368	7.00337e-08	116.368	6.46008e-08
116.482	4.4548e-08	116.468	7.09492e-08	116.468	6.55163e-08
116.582	4.39376e-08	116.568	7.09492e-08	116.568	6.55163e-08
116.682	4.4548e-08	116.668	7.21699e-08	116.668	6.6737e-08
116.782	4.4548e-08	116.768	6.94234e-08	116.768	6.39904e-08
116.882	4.30221e-08	116.868	6.94234e-08	116.868	6.39904e-08
116.982	4.24118e-08	116.968	6.82026e-08	116.968	6.27697e-08
117.082	4.18014e-08	117.068	7.09492e-08	117.068	6.55163e-08
117.182	4.27169e-08	117.168	6.75923e-08	117.168	6.21594e-08
117.282	4.21066e-08	117.268	6.69819e-08	117.268	6.1549e-08
117.382	4.08859e-08	117.368	6.97285e-08	117.368	6.42956e-08
117.482	3.99704e-08	117.468	7.09492e-08	117.468	6.55163e-08
117.582	4.02755e-08	117.568	7.12544e-08	117.568	6.58215e-08
117.682	3.90548e-08	117.668	7.4001e-08	117.668	6.85681e-08
117.782	3.99704e-08	117.768	7.36958e-08	117.768	6.82629e-08
117.882	3.99704e-08	117.868	7.52217e-08	117.868	6.97888e-08
117.982	3.84445e-08	117.968	7.33906e-08	117.968	6.79577e-08
118.082	3.90548e-08	118.068	7.33906e-08	118.068	6.79577e-08
118.182	3.75289e-08	118.168	7.36958e-08	118.168	6.82629e-08
118.282	3.75289e-08	118.268	7.49165e-08	118.268	6.94836e-08
118.382	3.60031e-08	118.368	7.55269e-08	118.368	7.00939e-08
118.482	3.66134e-08	118.468	7.21699e-08	118.468	6.6737e-08
118.582	3.63082e-08	118.568	7.00337e-08	118.568	6.46008e-08
118.682	3.63082e-08	118.668	6.66768e-08	118.668	6.12438e-08
118.782	3.66134e-08	118.768	6.45405e-08	118.768	5.91076e-08
118.882	3.53927e-08	118.868	6.33198e-08	118.868	5.78869e-08
118.982	3.4172e-08	118.968	6.30147e-08	118.968	5.75817e-08
119.082	3.4172e-08	119.068	6.1794e-08	119.068	5.6361e-08
119.182	3.50875e-08	119.168	5.99629e-08	119.168	5.453e-08
119.282	3.4172e-08	119.268	5.90474e-08	119.268	5.36144e-08
119.382	3.32565e-08	119.368	5.75215e-08	119.368	5.20886e-08
119.482	3.38668e-08	119.468	5.41646e-08	119.468	4.87316e-08
119.582	3.32565e-08	119.568	5.3249e-08	119.568	4.78161e-08
119.682	3.29513e-08	119.668	5.23335e-08	119.668	4.69006e-08
119.782	3.29513e-08	119.768	5.08076e-08	119.768	4.53747e-08
119.882	3.4172e-08	119.868	5.11128e-08	119.868	4.56799e-08
119.982	3.38668e-08	119.968	5.1418e-08	119.968	4.5985e-08
120.082	3.26461e-08	120.068	5.01973e-08	120.068	4.47643e-08
120.182	4.08859e-08	120.168	5.11128e-08	120.168	4.56799e-08
120.282	5.6755e-08	120.268	7.73579e-08	120.268	7.1925e-08
120.382	6.56051e-08	120.368	8.83442e-08	120.368	8.29113e-08
120.482	7.10983e-08	120.468	9.50581e-08	120.468	8.96252e-08
120.582	7.68966e-08	120.568	1.00856e-07	120.568	9.54235e-08
120.682	7.99484e-08	120.668	1.05739e-07	120.668	1.00306e-07
120.782	8.42208e-08	120.768	1.09707e-07	120.768	1.04274e-07
120.882	8.94088e-08	120.868	1.13674e-07	120.868	1.08241e-07
120.982	8.9714e-08	120.968	1.17031e-07	120.968	1.11598e-07
121.082	9.21554e-08	121.068	1.19167e-07	121.068	1.13734e-07
121.182	9.42916e-08	121.168	1.21303e-07	121.168	1.1587e-07
121.282	9.64279e-08	121.268	1.22829e-07	121.268	1.17396e-07
121.382	9.91745e-08	121.368	1.26186e-07	121.368	1.20753e-07
121.482	1.01311e-07	121.468	1.28933e-07	121.468	1.235e-07
121.582	1.02837e-07	121.568	1.31984e-07	121.568	1.26551e-07
121.682	1.06499e-07	121.668	1.36257e-07	121.668	1.30824e-07
121.782	1.0833e-07	121.768	1.39614e-07	121.768	1.34181e-07
121.882	1.10466e-07	121.868	1.40834e-07	121.868	1.35402e-07
121.982	1.12602e-07	121.968	1.41445e-07	121.968	1.36012e-07
122.082	1.15044e-07	122.068	1.42971e-07	122.068	1.37538e-07
122.182	1.17485e-07	122.168	1.46633e-07	122.168	1.412e-07
122.282	1.20537e-07	122.268	1.47548e-07	122.268	1.42115e-07
122.382	1.21147e-07	122.368	1.49074e-07	122.368	1.43641e-07
122.482	1.22673e-07	122.468	1.53347e-07	122.468	1.47914e-07
122.582	1.24199e-07	122.568	1.53347e-07	122.568	1.47914e-07
122.682	1.26945e-07	122.668	1.54873e-07	122.668	1.4944e-07
122.782	1.27861e-07	122.768	1.57314e-07	122.768	1.51881e-07
122.882	1.29082e-07	122.868	1.5945e-07	122.868	1.54017e-07
122.982	1.31218e-07	122.968	1.60366e-07	122.968	1.54933e-07
123.082	1.31828e-07	123.068	1.59755e-07	123.068	1.54322e-07
123.182	1.33354e-07	123.168	1.61586e-07	123.168	1.56153e-07
123.282	1.36101e-07	123.268	1.64028e-07	123.268	1.58595e-07
123.382	1.3549e-07	123.368	1.66469e-07	123.368	1.61036e-07
123.482	1.3549e-07	123.468	1.72268e-07	123.468	1.66835e-07
123.582	1.36406e-07	123.568	1.7715e-07	123.568	1.71717e-07
123.682	1.35796e-07	123.668	1.79592e-07	123.668	1.74159e-07
123.782	1.36711e-07	123.768	1.78981e-07	123.768	1.73549e-07
123.882	1.38847e-07	123.868	1.79592e-07	123.868	1.74159e-07
123.982	1.38237e-07	123.968	1.75319e-07	123.968	1.69886e-07
124.082	1.39458e-07	124.068	1.71962e-07	124.068	1.66529e-07
124.182	1.39763e-07	124.168	1.70131e-07	124.168	1.64698e-07
124.282	1.39458e-07	124.268	1.73488e-07	124.268	1.68055e-07
124.382	1.42204e-07	124.368	1.71047e-07	124.368	1.65614e-07
124.482	1.41289e-07	124.468	1.71047e-07	124.468	1.65614e-07
124.582	1.42815e-07	124.568	1.71657e-07	124.568	1.66224e-07
124.682	1.44646e-07	124.668	1.70437e-07	124.668	1.65004e-07
124.782	1.44646e-07	124.768	1.71047e-07	124.768	1.65614e-07
124.882	1.4434e-07	124.868	1.72573e-07	124.868	1.6714e-07
124.982	1.46782e-07	124.968	1.74404e-07	124.968	1.68971e-07
125.082	1.47087e-07	125.068	1.76845e-07	125.068	1.71412e-07
125.182	1.49834e-07	125.168	1.77761e-07	125.168	1.72328e-07
125.282	1.50139e-07	125.268	1.79287e-07	125.268	1.73854e-07
125.382	1.50749e-07	125.368	1.79897e-07	125.368	1.74464e-07
125.482	1.53801e-07	125.468	1.83254e-07	125.468	1.77821e-07
125.582	1.5258e-07	125.568	1.86e-07	125.568	1.80568e-07
125.682	1.54106e-07	125.668	1.91494e-07	125.668	1.86061e-07
125.782	1.55632e-07	125.768	1.9302e-07	125.768	1.87587e-07
125.882	1.56242e-07	125.868	1.92714e-07	125.868	1.87281e-07
125.982	1.56853e-07	125.968	1.90578e-07	125.968	1.85145e-07
126.082	1.57768e-07	126.068	1.87526e-07	126.068	1.82093e-07
126.182	1.59294e-07	126.168	1.88137e-07	126.168	1.82704e-07
126.282	1.6021e-07	126.268	1.86306e-07	126.268	1.80873e-07
126.382	1.62346e-07	126.368	1.89968e-07	126.368	1.84535e-07
126.482	1.62651e-07	126.468	1.89968e-07	126.468	1.84535e-07
126.582	1.64482e-07	126.568	1.87832e-07	126.568	1.82399e-07
126.682	1.67229e-07	126.668	1.88137e-07	126.668	1.82704e-07
126.782	1.67839e-07	126.768	1.91188e-07	126.768	1.85756e-07
126.882	1.6967e-07	126.868	1.91494e-07	126.868	1.86061e-07
126.982	1.6967e-07	126.968	1.92104e-07	126.968	1.86671e-07
127.082	1.7028e-07	127.068	1.91494e-07	127.068	1.86061e-07
127.182	1.70891e-07	127.168	1.92104e-07	127.168	1.86671e-07
127.282	1.71501e-07	127.268	1.9424e-07	127.268	1.88807e-07
127.382	1.72722e-07	127.368	1.96987e-07	127.368	1.91554e-07
127.482	1.75163e-07	127.468	2.00649e-07	127.468	1.95216e-07
127.582	1.73027e-07	127.568	2.03701e-07	127.568	1.98268e-07
127.682	1.75774e-07	127.668	2.04921e-07	127.668	1.99488e-07
127.782	1.73943e-07	127.768	2.06142e-07	127.768	2.00709e-07
127.882	1.75468e-07	127.868	2.07668e-07	127.868	2.02235e-07
127.982	1.74858e-07	127.968	2.09499e-07	127.968	2.04066e-07
128.082	1.76384e-07	128.068	2.10109e-07	128.068	2.04676e-07
128.182	1.76689e-07	128.168	2.1072e-07	128.168	2.05287e-07
128.282	1.76994e-07	128.268	2.08889e-07	128.268	2.03456e-07
128.382	1.77299e-07	128.368	2.08278e-07	128.368	2.02845e-07
128.482	1.79741e-07	128.468	2.05532e-07	128.468	2.00099e-07
128.582	1.7791e-07	128.568	2.08889e-07	128.568	2.03456e-07
128.682	1.77299e-07	128.668	2.10109e-07	128.668	2.04676e-07
128.782	1.75468e-07	128.768	2.1072e-07	128.768	2.05287e-07
128.882	1.76994e-07	128.868	2.12856e-07	128.868	2.07423e-07
128.982	1.7791e-07	128.968	2.1072e-07	128.968	2.05287e-07
129.082	1.76994e-07	129.068	2.1133e-07	129.068	2.05897e-07
129.182	1.80046e-07	129.168	2.13466e-07	129.168	2.08033e-07
129.282	1.80046e-07	129.268	2.15908e-07	129.268	2.10475e-07
129.382	1.81572e-07	129.368	2.18959e-07	129.368	2.13527e-07
129.482	1.82793e-07	129.468	2.21401e-07	129.468	2.15968e-07
129.582	1.83708e-07	129.568	2.21706e-07	129.568	2.16273e-07
129.682	1.82793e-07	129.668	2.17128e-07	129.668	2.11695e-07
129.782	1.80656e-07	129.768	2.15297e-07	129.768	2.09864e-07
129.882	1.74553e-07	129.868	2.11635e-07	129.868	2.06202e-07
129.982	1.5136e-07	129.968	2.09804e-07	129.968	2.04371e-07
130.082	1.39763e-07	130.068	2.11025e-07	130.068	2.05592e-07
130.182	1.31828e-07	130.168	1.89968e-07	130.168	1.84535e-07
130.282	1.27556e-07	130.268	1.81423e-07	130.268	1.7599e-07
130.382	1.23283e-07	130.368	1.71657e-07	130.368	1.66224e-07
130.482	1.19621e-07	130.468	1.64638e-07	130.468	1.59205e-07
130.582	1.16875e-07	130.568	1.60061e-07	130.568	1.54628e-07
130.682	1.14433e-07	130.668	1.57619e-07	130.668	1.52186e-07
130.782	1.11992e-07	130.768	1.54873e-07	130.768	1.4944e-07
130.882	1.0955e-07	130.868	1.50295e-07	130.868	1.44862e-07
130.982	1.10161e-07	130.968	1.50295e-07	130.968	1.44862e-07
131.082	1.08635e-07	131.068	1.47854e-07	131.068	1.42421e-07
131.182	1.07109e-07	131.168	1.44497e-07	131.168	1.39064e-07
131.282	1.06804e-07	131.268	1.4175e-07	131.268	1.36317e-07
131.382	1.04362e-07	131.368	1.4114e-07	131.368	1.35707e-07
131.482	1.02226e-07	131.468	1.37478e-07	131.468	1.32045e-07
131.582	1.00395e-07	131.568	1.36562e-07	131.568	1.31129e-07
131.682	1.0009e-07	131.668	1.34426e-07	131.668	1.28993e-07
131.782	9.91745e-08	131.768	1.3351e-07	131.768	1.28077e-07
131.882	9.85641e-08	131.868	1.31069e-07	131.868	1.25636e-07
131.982	9.79537e-08	131.968	1.28627e-07	131.968	1.23195e-07
132.082	9.55123e-08	132.068	1.28627e-07	132.068	1.23195e-07
132.182	9.58175e-08	132.168	1.26796e-07	132.168	1.21363e-07
132.282	9.64279e-08	132.268	1.2466e-07	132.268	1.19227e-07
132.382	9.39865e-08	132.368	1.2405e-07	132.368	1.18617e-07
132.482	9.21554e-08	132.468	1.22219e-07	132.468	1.16786e-07
132.582	9.21554e-08	132.568	1.22219e-07	132.568	1.16786e-07
132.682	9.15451e-08	132.668	1.20083e-07	132.668	1.1465e-07
132.782	8.94088e-08	132.768	1.19167e-07	132.768	1.13734e-07
132.882	8.91037e-08	132.868	1.1642e-07	132.868	1.10987e-07
132.982	8.81881e-08	132.968	1.16115e-07	132.968	1.10682e-07
133.082	8.81881e-08	133.068	1.13674e-07	133.068	1.08241e-07
133.182	8.63571e-08	133.168	1.13369e-07	133.168	1.07936e-07
133.282	8.51364e-08	133.268	1.12453e-07	133.268	1.0702e-07
133.382	8.42208e-08	133.368	1.12148e-07	133.368	1.06715e-07
133.482	8.39157e-08	133.468	1.09707e-07	133.468	1.04274e-07
133.582	8.23898e-08	133.568	1.07875e-07	133.568	1.02443e-07
133.682	7.9338e-08	133.668	1.0757e-07	133.668	1.02137e-07
133.782	7.99484e-08	133.768	1.0696e-07	133.768	1.01527e-07
133.882	7.87277e-08	133.868	1.0696e-07	133.868	1.01527e-07
133.982	7.78121e-08	133.968	1.0696e-07	133.968	1.01527e-07
134.082	7.7507e-08	134.068	1.04213e-07	134.068	9.87805e-08
134.182	7.53707e-08	134.168	1.04824e-07	134.168	9.93908e-08
134.282	7.50656e-08	134.268	1.04519e-07	134.268	9.90856e-08
134.382	7.35397e-08	134.368	1.05739e-07	134.368	1.00306e-07
134.482	7.29293e-08	134.468	1.05129e-07	134.468	9.9696e-08
134.582	7.29293e-08	134.568	1.04824e-07	134.568	9.93908e-08
134.682	7.20138e-08	134.668	1.04213e-07	134.668	9.87805e-08
134.782	7.20138e-08	134.768	1.03603e-07	134.768	9.81701e-08
134.882	7.35397e-08	134.868	1.02382e-07	134.868	9.69494e-08
134.982	6.98776e-08	134.968	9.99409e-08	134.968	9.4508e-08
135.082	7.10983e-08	135.068	1.00856e-07	135.068	9.54235e-08
135.182	7.07931e-08	135.168	9.74995e-08	135.168	9.20666e-08
135.282	6.95724e-08	135.268	9.87202e-08	135.268	9.32873e-08
135.382	6.83517e-08	135.368	9.74995e-08	135.368	9.20666e-08
135.482	6.68258e-08	135.468	9.59736e-08	135.468	9.05407e-08
135.582	6.7131e-08	135.568	9.44478e-08	135.568	8.90148e-08
135.682	6.62155e-08	135.668	9.38374e-08	135.668	8.84045e-08
135.782	6.65206e-08	135.768	9.38374e-08	135.768	8.84045e-08
135.882	6.68258e-08	135.868	9.32271e-08	135.868	8.77941e-08
135.982	6.68258e-08	135.968	9.26167e-08	135.968	8.71838e-08
136.082	6.62155e-08	136.068	9.10908e-08	136.068	8.56579e-08
136.182	6.7131e-08	136.168	8.92598e-08	136.168	8.38268e-08
136.282	6.59103e-08	136.268	8.83442e-08	136.268	8.29113e-08
136.382	6.37741e-08	136.368	8.83442e-08	136.368	8.29113e-08
136.482	5.88912e-08	136.468	8.83442e-08	136.468	8.29113e-08
136.582	6.0112e-08	136.568	8.71235e-08	136.568	8.16906e-08
136.682	5.79757e-08	136.668	8.68184e-08	136.668	8.13854e-08
136.782	5.79757e-08	136.768	8.6208e-08	136.768	8.07751e-08
136.882	5.73654e-08	136.868	8.46821e-08	136.868	7.92492e-08
136.982	5.73654e-08	136.968	8.49873e-08	136.968	7.95544e-08
137.082	5.6755e-08	137.068	8.34614e-08	137.068	7.80285e-08
137.182	5.73654e-08	137.168	8.4377e-08	137.168	7.8944e-08
137.282	5.55343e-08	137.268	7.94942e-08	137.268	7.40612e-08
137.382	5.4924e-08	137.368	8.25459e-08	137.368	7.7113e-08
137.482	5.30929e-08	137.468	8.07149e-08	137.468	7.52819e-08
137.582	5.18722e-08	137.568	8.01045e-08	137.568	7.46716e-08
137.682	5.09567e-08	137.668	7.97993e-08	137.668	7.43664e-08
137.782	5.1567e-08	137.768	7.9189e-08	137.768	7.3756e-08
137.882	5.03463e-08	137.868	7.88838e-08	137.868	7.34509e-08
137.982	5.12619e-08	137.968	7.88838e-08	137.968	7.34509e-08
138.082	4.88204e-08	138.068	7.9189e-08	138.068	7.3756e-08
138.182	4.69894e-08	138.168	7.9189e-08	138.168	7.3756e-08
138.282	4.4548e-08	138.268	7.79683e-08	138.268	7.25353e-08
138.382	4.24118e-08	138.368	7.64424e-08	138.368	7.10095e-08
138.482	4.18014e-08	138.468	7.70527e-08	138.468	7.16198e-08
138.582	4.24118e-08	138.568	7.64424e-08	138.568	7.10095e-08
138.682	4.18014e-08	138.668	7.64424e-08	138.668	7.10095e-08
138.782	4.21066e-08	138.768	7.46113e-08	138.768	6.91784e-08
138.882	4.02755e-08	138.868	7.67476e-08	138.868	7.13146e-08
138.982	3.96652e-08	138.968	7.55269e-08	138.968	7.00939e-08
139.082	3.99704e-08	139.068	7.4001e-08	139.068	6.85681e-08
139.182	4.08859e-08	139.168	7.43062e-08	139.168	6.88732e-08
139.282	4.21066e-08	139.268	7.24751e-08	139.268	6.70422e-08
139.382	4.11911e-08	139.368	7.36958e-08	139.368	6.82629e-08
139.482	4.14962e-08	139.468	7.21699e-08	139.468	6.6737e-08
139.582	4.21066e-08	139.568	7.21699e-08	139.568	6.6737e-08
139.682	4.08859e-08	139.668	7.15596e-08	139.668	6.61266e-08
139.782	4.14962e-08	139.768	7.30855e-08	139.768	6.76525e-08
139.882	4.02755e-08	139.868	7.24751e-08	139.868	6.70422e-08
139.982	3.81393e-08	139.968	7.36958e-08	139.968	6.82629e-08
140.082	3.81393e-08	140.068	7.4001e-08	140.068	6.85681e-08
140.182	3.66134e-08	140.168	9.90254e-08	140.168	9.35925e-08
140.282	4.39376e-08	140.268	1.10317e-07	140.268	1.04884e-07
140.382	6.22482e-08	140.368	1.17946e-07	140.368	1.12513e-07
140.482	6.98776e-08	140.468	1.2405e-07	140.468	1.18617e-07
140.582	7.2319e-08	140.568	1.28322e-07	140.568	1.22889e-07
140.682	7.53707e-08	140.668	1.29848e-07	140.668	1.24415e-07
140.782	7.84225e-08	140.768	1.31374e-07	140.768	1.25941e-07
140.882	8.11691e-08	140.868	1.329e-07	140.868	1.27467e-07
140.982	8.66622e-08	140.968	1.329e-07	140.968	1.27467e-07
141.082	8.54415e-08	141.068	1.35646e-07	141.068	1.30214e-07
141.182	8.66622e-08	141.168	1.35952e-07	141.168	1.30519e-07
141.282	8.72726e-08	141.268	1.39003e-07	141.268	1.3357e-07
141.382	8.78829e-08	141.368	1.39003e-07	141.368	1.3357e-07
141.482	8.87985e-08	141.468	1.38393e-07	141.468	1.3296e-07
141.582	9.00192e-08	141.568	1.4114e-07	141.568	1.35707e-07
141.682	9.33761e-08	141.668	1.45412e-07	141.668	1.39979e-07
141.782	9.42916e-08	141.768	1.45412e-07	141.768	1.39979e-07
141.882	9.45968e-08	141.868	1.47854e-07	141.868	1.42421e-07
141.982	9.45968e-08	141.968	1.52126e-07	141.968	1.46693e-07
142.082	9.52072e-08	142.068	1.56093e-07	142.068	1.5066e-07
142.182	9.64279e-08	142.168	1.60366e-07	142.168	1.54933e-07
142.282	9.61227e-08	142.268	1.63723e-07	142.268	1.5829e-07
142.382	9.73434e-08	142.368	1.66774e-07	142.368	1.61341e-07
142.482	9.76486e-08	142.468	1.69521e-07	142.468	1.64088e-07
142.582	9.91745e-08	142.568	1.71352e-07	142.568	1.65919e-07
142.682	1.0009e-07	142.668	1.72268e-07	142.668	1.66835e-07
142.782	1.007e-07	142.768	1.71352e-07	142.768	1.65919e-07
142.882	1.02531e-07	142.868	1.74709e-07	142.868	1.69276e-07
142.982	1.03447e-07	142.968	1.76235e-07	142.968	1.70802e-07
143.082	1.04362e-07	143.068	1.7593e-07	143.068	1.70497e-07
143.182	1.06499e-07	143.168	1.72268e-07	143.168	1.66835e-07
143.282	1.07109e-07	143.268	1.70131e-07	143.268	1.64698e-07
143.382	1.07719e-07	143.368	1.70742e-07	143.368	1.65309e-07
143.482	1.07719e-07	143.468	1.71047e-07	143.468	1.65614e-07
143.582	1.10466e-07	143.568	1.72268e-07	143.568	1.66835e-07
143.682	1.07414e-07	143.668	1.72573e-07	143.668	1.6714e-07
143.782	1.0894e-07	143.768	1.75319e-07	143.768	1.69886e-07
143.882	1.11687e-07	143.868	1.77456e-07	143.868	1.72023e-07
143.982	1.11687e-07	143.968	1.77761e-07	143.968	1.72328e-07
144.082	1.12297e-07	144.068	1.79592e-07	144.068	1.74159e-07
144.182	1.11687e-07	144.168	1.83254e-07	144.168	1.77821e-07
144.282	1.11992e-07	144.268	1.86e-07	144.268	1.80568e-07
144.382	1.13213e-07	144.368	1.89663e-07	144.368	1.8423e-07
144.482	1.11992e-07	144.468	1.90578e-07	144.468	1.85145e-07
144.582	1.12602e-07	144.568	1.91494e-07	144.568	1.86061e-07
144.682	1.14433e-07	144.668	1.94545e-07	144.668	1.89112e-07
144.782	1.16875e-07	144.768	1.9363e-07	144.768	1.88197e-07
144.882	1.16264e-07	144.868	1.96071e-07	144.868	1.90638e-07
144.982	1.16875e-07	144.968	1.95766e-07	144.968	1.90333e-07
145.082	1.19011e-07	145.068	1.97597e-07	145.068	1.92164e-07
145.182	1.18706e-07	145.168	2.00344e-07	145.168	1.94911e-07
145.282	1.1718e-07	145.268	2.03396e-07	145.268	1.97963e-07
145.382	1.19316e-07	145.368	2.03701e-07	145.368	1.98268e-07
145.482	1.20537e-07	145.468	1.96682e-07	145.468	1.91249e-07
145.582	1.20537e-07	145.568	1.96987e-07	145.568	1.91554e-07
145.682	1.22063e-07	145.668	1.96682e-07	145.668	1.91249e-07
145.782	1.23283e-07	145.768	1.96682e-07	145.768	1.91249e-07
145.882	1.25725e-07	145.868	1.99428e-07	145.868	1.93995e-07
145.982	1.28777e-07	145.968	1.99428e-07	145.968	1.93995e-07
146.082	1.31828e-07	146.068	2.01259e-07	146.068	1.95826e-07
146.182	1.3427e-07	146.168	2.01259e-07	146.168	1.95826e-07
146.282	1.32133e-07	146.268	2.00344e-07	146.268	1.94911e-07
146.382	1.32744e-07	146.368	2.0309e-07	146.368	1.97657e-07
146.482	1.30302e-07	146.468	2.05837e-07	146.468	2.00404e-07
146.582	1.30302e-07	146.568	2.11635e-07	146.568	2.06202e-07
146.682	1.34575e-07	146.668	2.07668e-07	146.668	2.02235e-07
146.782	1.35796e-07	146.768	2.05837e-07	146.768	2.00404e-07
146.882	1.36101e-07	146.868	2.05227e-07	146.868	1.99794e-07
146.982	1.36711e-07	146.968	2.0248e-07	146.968	1.97047e-07
147.082	1.38847e-07	147.068	2.0187e-07	147.068	1.96437e-07
147.182	1.36101e-07	147.168	1.98818e-07	147.168	1.93385e-07
147.282	1.34575e-07	147.268	2.03701e-07	147.268	1.98268e-07
147.382	1.35185e-07	147.368	2.01259e-07	147.368	1.95826e-07
147.482	1.36101e-07	147.468	2.01564e-07	147.468	1.96132e-07
147.582	1.37016e-07	147.568	2.00039e-07	147.568	1.94606e-07
147.682	1.36406e-07	147.668	2.00649e-07	147.668	1.95216e-07
147.782	1.37321e-07	147.768	2.01259e-07	147.768	1.95826e-07
147.882	1.38237e-07	147.868	2.03396e-07	147.868	1.97963e-07
147.982	1.40373e-07	147.968	2.0309e-07	147.968	1.97657e-07
148.082	1.40068e-07	148.068	2.04006e-07	148.068	1.98573e-07
148.182	1.40373e-07	148.168	2.08584e-07	148.168	2.03151e-07
148.282	1.41289e-07	148.268	2.09804e-07	148.268	2.04371e-07
148.382	1.43425e-07	148.368	2.10109e-07	148.368	2.04676e-07
148.482	1.42204e-07	148.468	2.1133e-07	148.468	2.05897e-07
148.582	1.42509e-07	148.568	2.14687e-07	148.568	2.09254e-07
148.682	1.4312e-07	148.668	2.13771e-07	148.668	2.08339e-07
148.782	1.4373e-07	148.768	2.14077e-07	148.768	2.08644e-07
148.882	1.4373e-07	148.868	2.16823e-07	148.868	2.1139e-07
148.982	1.42815e-07	148.968	2.15908e-07	148.968	2.10475e-07
149.082	1.43425e-07	149.068	2.16213e-07	149.068	2.1078e-07
149.182	1.46477e-07	149.168	2.18044e-07	149.168	2.12611e-07
149.282	1.46782e-07	149.268	2.21096e-07	149.268	2.15663e-07
149.382	1.47392e-07	149.368	2.2018e-07	149.368	2.14747e-07
149.482	1.46782e-07	149.468	2.21706e-07	149.468	2.16273e-07
149.582	1.47392e-07	149.568	2.23842e-07	149.568	2.18409e-07
149.682	1.47087e-07	149.668	2.27504e-07	149.668	2.22071e-07
149.782	1.44951e-07	149.768	2.26284e-07	149.768	2.20851e-07
149.882	1.28471e-07	149.868	2.25979e-07	149.868	2.20546e-07
149.982	1.23894e-07	149.968	2.26589e-07	149.968	2.21156e-07
150.082	1.20537e-07	150.068	2.26284e-07	150.068	2.20851e-07
150.182	1.18095e-07	150.168	2.05227e-07	150.168	1.99794e-07
150.282	1.15654e-07	150.268	1.93935e-07	150.268	1.88502e-07
150.382	1.09856e-07	150.368	1.88747e-07	150.368	1.83314e-07
150.482	1.04973e-07	150.468	1.79897e-07	150.468	1.74464e-07
150.582	1.01616e-07	150.568	1.74709e-07	150.568	1.69276e-07
150.682	1.007e-07	150.668	1.71657e-07	150.668	1.66224e-07
150.782	1.01311e-07	150.768	1.65859e-07	150.768	1.60426e-07
150.882	9.91745e-08	150.868	1.63112e-07	150.868	1.57679e-07
150.982	9.52072e-08	150.968	1.61892e-07	150.968	1.56459e-07
151.082	9.09347e-08	151.068	1.60061e-07	151.068	1.54628e-07
151.182	8.75778e-08	151.168	1.57314e-07	151.168	1.51881e-07
151.282	8.39157e-08	151.268	1.56093e-07	151.268	1.5066e-07
151.382	8.23898e-08	151.368	1.53347e-07	151.368	1.47914e-07
151.482	7.99484e-08	151.468	1.52126e-07	151.468	1.46693e-07
151.582	7.78121e-08	151.568	1.506e-07	151.568	1.45167e-07
151.682	7.62863e-08	151.668	1.49074e-07	151.668	1.43641e-07
151.782	7.62863e-08	151.768	1.49074e-07	151.768	1.43641e-07
151.882	7.59811e-08	151.868	1.46633e-07	151.868	1.412e-07
151.982	7.56759e-08	151.968	1.46633e-07	151.968	1.412e-07
152.082	7.68966e-08	152.068	1.44802e-07	152.068	1.39369e-07
152.182	7.53707e-08	152.168	1.43581e-07	152.168	1.38148e-07
152.282	7.56759e-08	152.268	1.44191e-07	152.268	1.38758e-07
152.382	7.50656e-08	152.368	1.42666e-07	152.368	1.37233e-07
152.482	7.50656e-08	152.468	1.4114e-07	152.468	1.35707e-07
152.582	7.44552e-08	152.568	1.38698e-07	152.568	1.33265e-07
152.682	7.29293e-08	152.668	1.38698e-07	152.668	1.33265e-07
152.782	7.415e-08	152.768	1.37478e-07	152.768	1.32045e-07
152.882	7.32345e-08	152.868	1.38088e-07	152.868	1.32655e-07
152.982	7.29293e-08	152.968	1.39919e-07	152.968	1.34486e-07
153.082	7.2319e-08	153.068	1.41445e-07	153.068	1.36012e-07
153.182	7.17086e-08	153.168	1.41445e-07	153.168	1.36012e-07
153.282	7.14035e-08	153.268	1.42666e-07	153.268	1.37233e-07
153.382	7.07931e-08	153.368	1.42971e-07	153.368	1.37538e-07
153.482	6.89621e-08	153.468	1.4175e-07	153.468	1.36317e-07
153.582	6.56051e-08	153.568	1.4236e-07	153.568	1.36927e-07
153.682	6.16378e-08	153.668	1.42971e-07	153.668	1.37538e-07
153.782	5.82809e-08	153.768	1.40529e-07	153.768	1.35096e-07
153.882	5.76705e-08	153.868	1.40529e-07	153.868	1.35096e-07
153.982	5.55343e-08	153.968	1.39003e-07	153.968	1.3357e-07
154.082	5.55343e-08	154.068	1.38698e-07	154.068	1.33265e-07
154.182	5.58395e-08	154.168	1.39309e-07	154.168	1.33876e-07
154.282	5.46188e-08	154.268	1.36867e-07	154.268	1.31434e-07
154.382	5.27877e-08	154.368	1.34731e-07	154.368	1.29298e-07
154.482	5.06515e-08	154.468	1.31679e-07	154.468	1.26246e-07
154.582	4.9736e-08	154.568	1.28627e-07	154.568	1.23195e-07
154.682	4.9736e-08	154.668	1.26796e-07	154.668	1.21363e-07
154.782	4.9736e-08	154.768	1.26186e-07	154.768	1.20753e-07
154.882	4.85153e-08	154.868	1.23134e-07	154.868	1.17701e-07
154.982	4.91256e-08	154.968	1.22524e-07	154.968	1.17091e-07
155.082	4.91256e-08	155.068	1.20693e-07	155.068	1.1526e-07
155.182	4.66842e-08	155.168	1.19777e-07	155.168	1.14344e-07
155.282	4.72946e-08	155.268	1.20998e-07	155.268	1.15565e-07
155.382	4.51583e-08	155.368	1.16726e-07	155.368	1.11293e-07
155.482	4.39376e-08	155.468	1.17336e-07	155.468	1.11903e-07
155.582	4.42428e-08	155.568	1.16726e-07	155.568	1.11293e-07
155.682	4.42428e-08	155.668	1.14589e-07	155.668	1.09156e-07
155.782	4.33273e-08	155.768	1.14895e-07	155.768	1.09462e-07
[truncated: 500 more rows]

## Sheet: Figure S13(b)
0.79588	-2.42224e-06	0.78688	-2.13446e-06	0.78688	-2.13286e-06
0.80588	-2.15368e-06	0.79688	-1.90558e-06	0.79688	-1.90398e-06
0.81588	-1.9248e-06	0.80688	-1.69501e-06	0.80688	-1.6934e-06
0.82588	-1.78747e-06	0.81688	-1.58209e-06	0.81688	-1.58049e-06
0.83588	-1.63488e-06	0.82688	-1.43866e-06	0.82688	-1.43706e-06
0.84588	-1.56042e-06	0.83688	-1.37946e-06	0.83688	-1.37785e-06
0.85588	-1.44262e-06	0.84688	-1.27143e-06	0.84688	-1.26982e-06
0.86588	-1.38647e-06	0.85688	-1.22809e-06	0.85688	-1.22649e-06
0.87588	-1.29125e-06	0.86688	-1.14203e-06	0.86688	-1.14043e-06
0.88588	-1.25555e-06	0.87688	-1.11243e-06	0.87688	-1.11082e-06
0.89588	-1.04742e-06	0.88688	-9.14064e-07	0.88688	-9.1246e-07
0.90588	-1.023e-06	0.89688	-8.985e-07	0.89688	-8.96896e-07
0.91588	-9.55256e-07	0.90688	-8.32582e-07	0.90688	-8.30978e-07
0.92588	-9.39082e-07	0.91688	-8.24648e-07	0.91688	-8.23044e-07
0.93588	-8.78046e-07	0.92688	-7.66359e-07	0.92688	-7.64755e-07
0.94588	-8.67976e-07	0.93688	-7.64223e-07	0.93688	-7.62619e-07
0.95588	-8.13654e-07	0.94688	-7.09596e-07	0.94688	-7.07992e-07
0.96588	-8.09687e-07	0.95688	-7.12953e-07	0.95688	-7.11349e-07
0.97588	-7.60859e-07	0.96688	-6.63515e-07	0.96688	-6.61911e-07
0.98588	-7.59638e-07	0.97688	-6.69924e-07	0.97688	-6.68319e-07
0.99588	-7.14777e-07	0.98688	-6.22621e-07	0.98688	-6.21017e-07
1.00588	-7.1844e-07	0.99688	-6.32692e-07	0.99688	-6.31088e-07
1.01588	-6.7541e-07	1.00688	-5.89052e-07	1.00688	-5.87448e-07
1.02588	-6.80903e-07	1.01688	-6.01564e-07	1.01688	-5.9996e-07
1.03588	-6.40925e-07	1.02688	-5.59938e-07	1.02688	-5.58334e-07
1.04588	-6.47944e-07	1.03688	-5.73641e-07	1.03688	-5.72036e-07
1.05588	-6.1236e-07	1.04688	-5.33327e-07	1.04688	-5.31723e-07
1.06588	-6.21455e-07	1.05688	-5.48677e-07	1.05688	-5.47073e-07
1.07588	-5.86756e-07	1.06688	-5.10713e-07	1.06688	-5.09109e-07
1.08588	-5.97071e-07	1.07688	-5.28078e-07	1.07688	-5.26474e-07
1.09588	-5.63014e-07	1.08688	-4.90175e-07	1.08688	-4.88571e-07
1.10588	-5.75739e-07	1.09688	-5.08211e-07	1.09688	-5.06607e-07
1.11588	-5.43025e-07	1.10688	-4.72048e-07	1.10688	-4.70443e-07
1.12588	-5.55994e-07	1.11688	-4.90846e-07	1.11688	-4.89242e-07
1.13588	-5.24836e-07	1.12688	-4.5511e-07	1.12688	-4.53506e-07
1.14588	-5.38599e-07	1.13688	-4.75557e-07	1.13688	-4.73953e-07
1.15588	-5.08326e-07	1.14688	-4.4092e-07	1.14688	-4.39315e-07
1.16588	-5.22212e-07	1.15688	-4.61855e-07	1.15688	-4.60251e-07
1.17588	-4.93159e-07	1.16688	-4.28468e-07	1.16688	-4.26864e-07
1.18588	-5.08509e-07	1.17688	-4.48885e-07	1.17688	-4.47281e-07
1.19588	-4.80006e-07	1.18688	-4.16567e-07	1.18688	-4.14962e-07
1.20588	-4.95722e-07	1.19688	-4.38173e-07	1.19688	-4.36569e-07
1.21588	-4.67646e-07	1.20688	-4.05641e-07	1.20688	-4.04037e-07
1.22588	-4.84461e-07	1.21688	-4.27553e-07	1.21688	-4.25949e-07
1.23588	-4.56568e-07	1.22688	-3.95601e-07	1.22688	-3.93997e-07
1.24588	-4.73963e-07	1.23688	-4.18428e-07	1.23688	-4.16824e-07
1.25588	-4.46833e-07	1.24688	-3.86415e-07	1.24688	-3.84811e-07
1.26588	-4.63984e-07	1.25688	-4.09242e-07	1.25688	-4.07638e-07
1.27588	-4.36976e-07	1.26688	-3.7842e-07	1.26688	-3.76815e-07
1.28588	-4.54554e-07	1.27688	-4.00942e-07	1.27688	-3.99337e-07
1.29588	-4.28828e-07	1.28688	-3.71095e-07	1.28688	-3.69491e-07
1.30588	-4.47047e-07	1.29688	-3.93526e-07	1.29688	-3.91922e-07
1.31588	-4.20985e-07	1.30688	-3.63191e-07	1.30688	-3.61587e-07
1.32588	-4.3896e-07	1.31688	-3.87239e-07	1.31688	-3.85635e-07
1.33588	-4.13752e-07	1.32688	-3.57851e-07	1.32688	-3.56247e-07
1.34588	-4.3191e-07	1.33688	-3.81166e-07	1.33688	-3.79562e-07
1.35588	-4.07282e-07	1.34688	-3.51015e-07	1.34688	-3.49411e-07
1.36588	-4.25898e-07	1.35688	-3.74574e-07	1.35688	-3.7297e-07
1.37588	-4.01087e-07	1.36688	-3.45644e-07	1.36688	-3.4404e-07
1.38588	-4.1955e-07	1.37688	-3.68837e-07	1.37688	-3.67233e-07
1.39588	-3.94892e-07	1.38688	-3.39968e-07	1.38688	-3.38363e-07
1.40588	-4.13722e-07	1.39688	-3.63741e-07	1.39688	-3.62137e-07
1.41588	-3.89521e-07	1.40688	-3.34657e-07	1.40688	-3.33053e-07
1.42588	-4.08381e-07	1.41688	-3.59285e-07	1.41688	-3.57681e-07
1.43588	-3.85188e-07	1.42688	-3.3008e-07	1.42688	-3.28476e-07
1.44588	-4.03376e-07	1.43688	-3.54646e-07	1.43688	-3.53042e-07
1.45588	-3.80335e-07	1.44688	-3.25746e-07	1.44688	-3.24142e-07
1.46588	-3.98707e-07	1.45688	-3.50557e-07	1.45688	-3.48953e-07
1.47588	-3.76215e-07	1.46688	-3.22084e-07	1.46688	-3.2048e-07
1.48588	-3.94831e-07	1.47688	-3.46468e-07	1.47688	-3.44864e-07
1.49588	-3.71607e-07	1.48688	-3.17934e-07	1.48688	-3.1633e-07
1.50588	-3.89552e-07	1.49688	-3.42165e-07	1.49688	-3.40561e-07
1.51588	-3.66511e-07	1.50688	-3.14089e-07	1.50688	-3.12484e-07
1.52588	-3.85981e-07	1.51688	-3.3893e-07	1.51688	-3.37326e-07
1.53588	-3.6294e-07	1.52688	-3.10549e-07	1.52688	-3.08944e-07
1.54588	-3.8238e-07	1.53688	-3.36305e-07	1.53688	-3.34701e-07
1.55588	-3.60468e-07	1.54688	-3.08229e-07	1.54688	-3.06625e-07
1.56588	-3.79054e-07	1.55688	-3.32308e-07	1.55688	-3.30703e-07
1.57588	-3.56379e-07	1.56688	-3.03743e-07	1.56688	-3.02139e-07
1.58588	-3.75544e-07	1.57688	-3.29164e-07	1.57688	-3.2756e-07
1.59588	-3.53388e-07	1.58688	-3.0237e-07	1.58688	-3.00766e-07
1.60588	-3.72431e-07	1.59688	-3.26662e-07	1.59688	-3.25058e-07
1.61588	-3.50947e-07	1.60688	-2.98128e-07	1.60688	-2.96524e-07
1.62588	-3.68647e-07	1.61688	-3.2358e-07	1.61688	-3.21975e-07
1.63588	-3.47437e-07	1.62688	-2.96694e-07	1.62688	-2.95089e-07
1.64588	-3.66053e-07	1.63688	-3.19856e-07	1.63688	-3.18252e-07
1.65588	-3.45057e-07	1.64688	-2.93581e-07	1.64688	-2.91977e-07
1.66588	-3.6294e-07	1.65688	-3.1827e-07	1.65688	-3.16665e-07
1.67588	-3.42829e-07	1.66688	-2.91261e-07	1.66688	-2.89657e-07
1.68588	-3.60865e-07	1.67688	-3.1595e-07	1.67688	-3.14346e-07
1.69588	-3.39503e-07	1.68688	-2.89247e-07	1.68688	-2.87643e-07
1.70588	-3.576e-07	1.69688	-3.1415e-07	1.69688	-3.12545e-07
1.71588	-3.37153e-07	1.70688	-2.8644e-07	1.70688	-2.84836e-07
1.72588	-3.55372e-07	1.71688	-3.10762e-07	1.71688	-3.09158e-07
1.73588	-3.35261e-07	1.72688	-2.84395e-07	1.72688	-2.82791e-07
1.74588	-3.52992e-07	1.73688	-3.09297e-07	1.73688	-3.07693e-07
1.75588	-3.3346e-07	1.74688	-2.8235e-07	1.74688	-2.80746e-07
1.76588	-3.50672e-07	1.75688	-3.06642e-07	1.75688	-3.05038e-07
1.77588	-3.3111e-07	1.76688	-2.81679e-07	1.76688	-2.80075e-07
1.78588	-3.48475e-07	1.77688	-3.04872e-07	1.77688	-3.03268e-07
1.79588	-3.28486e-07	1.78688	-2.79054e-07	1.78688	-2.7745e-07
1.80588	-3.46095e-07	1.79688	-3.03774e-07	1.79688	-3.02169e-07
1.81588	-3.2638e-07	1.80688	-2.76918e-07	1.80688	-2.75314e-07
1.82588	-3.44019e-07	1.81688	-3.00874e-07	1.81688	-2.9927e-07
1.83588	-3.25037e-07	1.82688	-2.75392e-07	1.82688	-2.73788e-07
1.84588	-3.42066e-07	1.83688	-2.9941e-07	1.83688	-2.97805e-07
1.85588	-3.23634e-07	1.84688	-2.7408e-07	1.84688	-2.72476e-07
1.86588	-3.399e-07	1.85688	-2.97395e-07	1.85688	-2.95791e-07
1.87588	-3.22199e-07	1.86688	-2.72188e-07	1.86688	-2.70584e-07
1.88588	-3.38191e-07	1.87688	-2.95534e-07	1.87688	-2.9393e-07
1.89588	-3.20368e-07	1.88688	-2.70723e-07	1.88688	-2.69119e-07
1.90588	-3.36512e-07	1.89688	-2.94069e-07	1.89688	-2.92465e-07
1.91588	-3.1869e-07	1.90688	-2.69716e-07	1.90688	-2.68112e-07
1.92588	-3.34895e-07	1.91688	-2.93154e-07	1.91688	-2.91549e-07
1.93588	-3.17133e-07	1.92688	-2.67763e-07	1.92688	-2.66159e-07
1.94588	-3.32362e-07	1.93688	-2.91231e-07	1.93688	-2.89627e-07
1.95588	-3.16157e-07	1.94688	-2.66298e-07	1.94688	-2.64694e-07
1.96588	-3.31049e-07	1.95688	-2.90163e-07	1.95688	-2.88559e-07
1.97588	-3.14265e-07	1.96688	-2.65718e-07	1.96688	-2.64114e-07
1.98588	-3.29768e-07	1.97688	-2.88545e-07	1.97688	-2.86941e-07
1.99588	-3.13441e-07	1.98688	-2.63643e-07	1.98688	-2.62039e-07
2.00588	-3.27845e-07	1.99688	-2.87294e-07	1.99688	-2.8569e-07
2.01588	-3.12464e-07	2.00688	-2.62666e-07	2.00688	-2.61062e-07
2.02588	-3.26777e-07	2.01688	-2.85463e-07	2.01688	-2.83859e-07
2.03588	-3.10633e-07	2.02688	-2.60835e-07	2.02688	-2.59231e-07
2.04588	-3.24732e-07	2.03688	-2.85097e-07	2.03688	-2.83493e-07
2.05588	-3.09077e-07	2.04688	-2.60042e-07	2.04688	-2.58438e-07
2.06588	-3.22382e-07	2.05688	-2.83602e-07	2.05688	-2.81997e-07
2.07588	-3.08222e-07	2.06688	-2.5876e-07	2.06688	-2.57156e-07
2.08588	-3.21284e-07	2.07688	-2.82228e-07	2.07688	-2.80624e-07
2.09588	-3.06483e-07	2.08688	-2.57723e-07	2.08688	-2.56118e-07
2.10588	-3.20551e-07	2.09688	-2.80672e-07	2.09688	-2.79068e-07
2.11588	-3.05323e-07	2.10688	-2.56838e-07	2.10688	-2.55233e-07
2.12588	-3.19331e-07	2.11688	-2.79634e-07	2.11688	-2.7803e-07
2.13588	-3.04347e-07	2.12688	-2.55098e-07	2.12688	-2.53494e-07
2.14588	-3.17957e-07	2.13688	-2.78627e-07	2.13688	-2.77023e-07
2.15588	-3.03187e-07	2.14688	-2.54396e-07	2.14688	-2.52792e-07
2.16588	-3.17133e-07	2.15688	-2.78261e-07	2.15688	-2.76657e-07
2.17588	-3.02119e-07	2.16688	-2.53694e-07	2.16688	-2.5209e-07
2.18588	-3.15455e-07	2.17688	-2.7643e-07	2.17688	-2.74826e-07
2.19588	-3.0099e-07	2.18688	-2.51924e-07	2.18688	-2.5032e-07
2.20588	-3.14021e-07	2.19688	-2.75484e-07	2.19688	-2.7388e-07
2.21588	-2.99616e-07	2.20688	-2.52199e-07	2.20688	-2.50595e-07
2.22588	-3.13471e-07	2.21688	-2.74324e-07	2.21688	-2.7272e-07
2.23588	-2.98731e-07	2.22688	-2.50459e-07	2.22688	-2.48855e-07
2.24588	-3.10999e-07	2.23688	-2.73287e-07	2.23688	-2.71682e-07
2.25588	-2.9806e-07	2.24688	-2.49849e-07	2.24688	-2.48245e-07
2.26588	-3.1106e-07	2.25688	-2.72432e-07	2.25688	-2.70828e-07
2.27588	-2.97236e-07	2.26688	-2.49178e-07	2.26688	-2.47574e-07
2.28588	-3.10297e-07	2.27688	-2.71791e-07	2.27688	-2.70187e-07
2.29588	-2.95985e-07	2.28688	-2.47957e-07	2.28688	-2.46353e-07
2.30588	-3.0865e-07	2.29688	-2.70815e-07	2.29688	-2.69211e-07
2.31588	-2.94611e-07	2.30688	-2.46919e-07	2.30688	-2.45315e-07
2.32588	-3.07765e-07	2.31688	-2.69136e-07	2.31688	-2.67532e-07
2.33588	-2.94276e-07	2.32688	-2.46553e-07	2.32688	-2.44949e-07
2.34588	-3.05445e-07	2.33688	-2.68831e-07	2.33688	-2.67227e-07
2.35588	-2.93757e-07	2.34688	-2.45241e-07	2.34688	-2.43637e-07
2.36588	-3.04804e-07	2.35688	-2.6761e-07	2.35688	-2.66006e-07
2.37588	-2.93208e-07	2.36688	-2.4518e-07	2.36688	-2.43576e-07
2.38588	-3.03858e-07	2.37688	-2.67153e-07	2.37688	-2.65548e-07
2.39588	-2.91804e-07	2.38688	-2.43959e-07	2.38688	-2.42355e-07
2.40588	-3.03309e-07	2.39688	-2.65627e-07	2.39688	-2.64023e-07
2.41588	-2.91224e-07	2.40688	-2.43044e-07	2.40688	-2.4144e-07
2.42588	-3.02088e-07	2.41688	-2.64894e-07	2.41688	-2.6329e-07
2.43588	-2.8979e-07	2.42688	-2.42769e-07	2.42688	-2.41165e-07
2.44588	-3.01692e-07	2.43688	-2.64467e-07	2.43688	-2.62863e-07
2.45588	-2.90125e-07	2.44688	-2.42189e-07	2.44688	-2.40585e-07
2.46588	-3.00837e-07	2.45688	-2.63796e-07	2.45688	-2.62191e-07
2.47588	-2.88752e-07	2.46688	-2.4164e-07	2.46688	-2.40036e-07
2.48588	-2.99464e-07	2.47688	-2.62666e-07	2.47688	-2.61062e-07
2.49588	-2.88447e-07	2.48688	-2.41304e-07	2.48688	-2.397e-07
2.50588	-2.98731e-07	2.49688	-2.61812e-07	2.49688	-2.60208e-07
2.51588	-2.87653e-07	2.50688	-2.40541e-07	2.50688	-2.38937e-07
2.52588	-2.9806e-07	2.51688	-2.61354e-07	2.51688	-2.5975e-07
2.53588	-2.87043e-07	2.52688	-2.39992e-07	2.52688	-2.38388e-07
2.54588	-2.96381e-07	2.53688	-2.6053e-07	2.53688	-2.58926e-07
2.55588	-2.85609e-07	2.54688	-2.38741e-07	2.54688	-2.37137e-07
2.56588	-2.95496e-07	2.55688	-2.59371e-07	2.55688	-2.57766e-07
2.57588	-2.85243e-07	2.56688	-2.38649e-07	2.56688	-2.37045e-07
2.58588	-2.9571e-07	2.57688	-2.58211e-07	2.57688	-2.56607e-07
2.59588	-2.84815e-07	2.58688	-2.37917e-07	2.58688	-2.36313e-07
2.60588	-2.93848e-07	2.59688	-2.58364e-07	2.59688	-2.56759e-07
2.61588	-2.84083e-07	2.60688	-2.37489e-07	2.60688	-2.35885e-07
2.62588	-2.93086e-07	2.61688	-2.57417e-07	2.61688	-2.55813e-07
2.63588	-2.83106e-07	2.62688	-2.37215e-07	2.62688	-2.35611e-07
2.64588	-2.92689e-07	2.63688	-2.56593e-07	2.63688	-2.54989e-07
2.65588	-2.82526e-07	2.64688	-2.35872e-07	2.64688	-2.34268e-07
2.66588	-2.92048e-07	2.65688	-2.56197e-07	2.65688	-2.54593e-07
2.67588	-2.81947e-07	2.66688	-2.35689e-07	2.66688	-2.34085e-07
2.68588	-2.91285e-07	2.67688	-2.54183e-07	2.67688	-2.52578e-07
2.69588	-2.8213e-07	2.68688	-2.34957e-07	2.68688	-2.33352e-07
2.70588	-2.90156e-07	2.69688	-2.54488e-07	2.69688	-2.52884e-07
2.71588	-2.81092e-07	2.70688	-2.34987e-07	2.70688	-2.33383e-07
2.72588	-2.89088e-07	2.71688	-2.53298e-07	2.71688	-2.51693e-07
2.73588	-2.80879e-07	2.72688	-2.34346e-07	2.72688	-2.32742e-07
2.74588	-2.8863e-07	2.73688	-2.52565e-07	2.73688	-2.50961e-07
2.75588	-2.79963e-07	2.74688	-2.3337e-07	2.74688	-2.31765e-07
2.76588	-2.88599e-07	2.75688	-2.51772e-07	2.75688	-2.50168e-07
2.77588	-2.78895e-07	2.76688	-2.33492e-07	2.76688	-2.31888e-07
2.78588	-2.86799e-07	2.77688	-2.50704e-07	2.77688	-2.49099e-07
2.79588	-2.78559e-07	2.78688	-2.32912e-07	2.78688	-2.31308e-07
2.80588	-2.86311e-07	2.79688	-2.50978e-07	2.79688	-2.49374e-07
2.81588	-2.77796e-07	2.80688	-2.32271e-07	2.80688	-2.30667e-07
2.82588	-2.85578e-07	2.81688	-2.50124e-07	2.81688	-2.4852e-07
2.83588	-2.77247e-07	2.82688	-2.32576e-07	2.82688	-2.30972e-07
2.84588	-2.84785e-07	2.83688	-2.49391e-07	2.83688	-2.47787e-07
2.85588	-2.76667e-07	2.84688	-2.32332e-07	2.84688	-2.30728e-07
2.86588	-2.84449e-07	2.85688	-2.48293e-07	2.85688	-2.46689e-07
2.87588	-2.75691e-07	2.86688	-2.31966e-07	2.86688	-2.30362e-07
2.88588	-2.83595e-07	2.87688	-2.48445e-07	2.87688	-2.46841e-07
2.89588	-2.75294e-07	2.88688	-2.3163e-07	2.88688	-2.30026e-07
2.90588	-2.8216e-07	2.89688	-2.48049e-07	2.89688	-2.46444e-07
2.91588	-2.74775e-07	2.90688	-2.3102e-07	2.90688	-2.29416e-07
2.92588	-2.82435e-07	2.91688	-2.47774e-07	2.91688	-2.4617e-07
2.93588	-2.74592e-07	2.92688	-2.30165e-07	2.92688	-2.28561e-07
2.94588	-2.81641e-07	2.93688	-2.46523e-07	2.93688	-2.44919e-07
2.95588	-2.74378e-07	2.94688	-2.29433e-07	2.94688	-2.27829e-07
2.96588	-2.81031e-07	2.95688	-2.45546e-07	2.95688	-2.43942e-07
2.97588	-2.74073e-07	2.96688	-2.29524e-07	2.96688	-2.2792e-07
2.98588	-2.80512e-07	2.97688	-2.44966e-07	2.97688	-2.43362e-07
2.99588	-2.73859e-07	2.98688	-2.28975e-07	2.98688	-2.27371e-07
3.00588	-2.79017e-07	2.99688	-2.43593e-07	2.99688	-2.41989e-07
3.01588	-2.73371e-07	3.00688	-2.28884e-07	3.00688	-2.27279e-07
3.02588	-2.78834e-07	3.01688	-2.44173e-07	3.01688	-2.42569e-07
3.03588	-2.72974e-07	3.02688	-2.2809e-07	3.02688	-2.26486e-07
3.04588	-2.77644e-07	3.03688	-2.43288e-07	3.03688	-2.41684e-07
3.05588	-2.72517e-07	3.04688	-2.27205e-07	3.04688	-2.25601e-07
3.06588	-2.77796e-07	3.05688	-2.42311e-07	3.05688	-2.40707e-07
3.07588	-2.72089e-07	3.06688	-2.27876e-07	3.06688	-2.26272e-07
3.08588	-2.76209e-07	3.07688	-2.42433e-07	3.07688	-2.40829e-07
3.09588	-2.71388e-07	3.08688	-2.26808e-07	3.08688	-2.25204e-07
3.10588	-2.75935e-07	3.09688	-2.41548e-07	3.09688	-2.39944e-07
3.11588	-2.7093e-07	3.10688	-2.26991e-07	3.10688	-2.25387e-07
3.12588	-2.74958e-07	3.11688	-2.40968e-07	3.11688	-2.39364e-07
3.13588	-2.70838e-07	3.12688	-2.26625e-07	3.12688	-2.25021e-07
3.14588	-2.74378e-07	3.13688	-2.39748e-07	3.13688	-2.38144e-07
3.15588	-2.70655e-07	3.14688	-2.25649e-07	3.14688	-2.24044e-07
3.16588	-2.74073e-07	3.15688	-2.39443e-07	3.15688	-2.37838e-07
3.17588	-2.70014e-07	3.16688	-2.25252e-07	3.16688	-2.23648e-07
3.18588	-2.73371e-07	3.17688	-2.39473e-07	3.17688	-2.37869e-07
3.19588	-2.69831e-07	3.18688	-2.25343e-07	3.18688	-2.23739e-07
3.20588	-2.72486e-07	3.19688	-2.38588e-07	3.19688	-2.36984e-07
3.21588	-2.69587e-07	3.20688	-2.25435e-07	3.20688	-2.23831e-07
3.22588	-2.7151e-07	3.21688	-2.38374e-07	3.21688	-2.3677e-07
3.23588	-2.69526e-07	3.22688	-2.24092e-07	3.22688	-2.22488e-07
3.24588	-2.71021e-07	3.23688	-2.37306e-07	3.23688	-2.35702e-07
3.25588	-2.68153e-07	3.24688	-2.24031e-07	3.24688	-2.22427e-07
3.26588	-2.7096e-07	3.25688	-2.36879e-07	3.25688	-2.35275e-07
3.27588	-2.68702e-07	3.26688	-2.23482e-07	3.26688	-2.21878e-07
3.28588	-2.69373e-07	3.27688	-2.36604e-07	3.27688	-2.35e-07
3.29588	-2.68366e-07	3.28688	-2.23421e-07	3.28688	-2.21817e-07
3.30588	-2.68977e-07	3.29688	-2.35262e-07	3.29688	-2.33658e-07
3.31588	-2.67848e-07	3.30688	-2.2339e-07	3.30688	-2.21786e-07
3.32588	-2.69129e-07	3.31688	-2.36299e-07	3.31688	-2.34695e-07
3.33588	-2.68641e-07	3.32688	-2.23543e-07	3.32688	-2.21939e-07
3.34588	-2.68458e-07	3.33688	-2.35414e-07	3.33688	-2.3381e-07
3.35588	-2.67451e-07	3.34688	-2.23085e-07	3.34688	-2.21481e-07
3.36588	-2.67817e-07	3.35688	-2.35262e-07	3.35688	-2.33658e-07
3.37588	-2.67115e-07	3.36688	-2.22322e-07	3.36688	-2.20718e-07
3.38588	-2.66932e-07	3.37688	-2.33583e-07	3.37688	-2.31979e-07
3.39588	-2.66444e-07	3.38688	-2.22658e-07	3.38688	-2.21054e-07
3.40588	-2.66688e-07	3.39688	-2.34133e-07	3.39688	-2.32528e-07
3.41588	-2.66016e-07	3.40688	-2.21559e-07	3.40688	-2.19955e-07
3.42588	-2.65925e-07	3.41688	-2.33187e-07	3.41688	-2.31582e-07
3.43588	-2.66383e-07	3.42688	-2.222e-07	3.42688	-2.20596e-07
3.44588	-2.65559e-07	3.43688	-2.32942e-07	3.43688	-2.31338e-07
3.45588	-2.66779e-07	3.44688	-2.21895e-07	3.44688	-2.20291e-07
3.46588	-2.64613e-07	3.45688	-2.32973e-07	3.45688	-2.31369e-07
3.47588	-2.65772e-07	3.46688	-2.21346e-07	3.46688	-2.19742e-07
3.48588	-2.64674e-07	3.47688	-2.3102e-07	3.47688	-2.29416e-07
3.49588	-2.65284e-07	3.48688	-2.21712e-07	3.48688	-2.20108e-07
3.50588	-2.6446e-07	3.49688	-2.31447e-07	3.49688	-2.29843e-07
3.51588	-2.64674e-07	3.50688	-2.21071e-07	3.50688	-2.19467e-07
3.52588	-2.63667e-07	3.51688	-2.31355e-07	3.51688	-2.29751e-07
3.53588	-2.65162e-07	3.52688	-2.20644e-07	3.52688	-2.1904e-07
3.54588	-2.62812e-07	3.53688	-2.30043e-07	3.53688	-2.28439e-07
3.55588	-2.65254e-07	3.54688	-2.19911e-07	3.54688	-2.18307e-07
3.56588	-2.62629e-07	3.55688	-2.30043e-07	3.55688	-2.28439e-07
3.57588	-2.65009e-07	3.56688	-2.20094e-07	3.56688	-2.1849e-07
3.58588	-2.61713e-07	3.57688	-2.29738e-07	3.57688	-2.28134e-07
3.59588	-2.6446e-07	3.58688	-2.20186e-07	3.58688	-2.18582e-07
3.60588	-2.61286e-07	3.59688	-2.29128e-07	3.59688	-2.27524e-07
3.61588	-2.6443e-07	3.60688	-2.20156e-07	3.60688	-2.18551e-07
3.62588	-2.61073e-07	3.61688	-2.28487e-07	3.61688	-2.26883e-07
3.63588	-2.64216e-07	3.62688	-2.18447e-07	3.62688	-2.16842e-07
3.64588	-2.59669e-07	3.63688	-2.28273e-07	3.63688	-2.26669e-07
3.65588	-2.64613e-07	3.64688	-2.18569e-07	3.64688	-2.16964e-07
3.66588	-2.59455e-07	3.65688	-2.27999e-07	3.65688	-2.26394e-07
3.67588	-2.62904e-07	3.66688	-2.18996e-07	3.66688	-2.17392e-07
3.68588	-2.59364e-07	3.67688	-2.27907e-07	3.67688	-2.26303e-07
3.69588	-2.64216e-07	3.68688	-2.19087e-07	3.68688	-2.17483e-07
3.70588	-2.58723e-07	3.69688	-2.26534e-07	3.69688	-2.2493e-07
3.71588	-2.63514e-07	3.70688	-2.17958e-07	3.70688	-2.16354e-07
3.72588	-2.57838e-07	3.71688	-2.26015e-07	3.71688	-2.24411e-07
3.73588	-2.63087e-07	3.72688	-2.18508e-07	3.72688	-2.16903e-07
3.74588	-2.58021e-07	3.73688	-2.25893e-07	3.73688	-2.24289e-07
3.75588	-2.6266e-07	3.74688	-2.1747e-07	3.74688	-2.15866e-07
3.76588	-2.57166e-07	3.75688	-2.25862e-07	3.75688	-2.24258e-07
3.77588	-2.62721e-07	3.76688	-2.17592e-07	3.76688	-2.15988e-07
3.78588	-2.568e-07	3.77688	-2.25099e-07	3.77688	-2.23495e-07
3.79588	-2.6266e-07	3.78688	-2.17378e-07	3.78688	-2.15774e-07
3.80588	-2.56464e-07	3.79688	-2.24611e-07	3.79688	-2.23007e-07
3.81588	-2.61897e-07	3.80688	-2.16799e-07	3.80688	-2.15194e-07
3.82588	-2.55793e-07	3.81688	-2.24642e-07	3.81688	-2.23037e-07
3.83588	-2.62385e-07	3.82688	-2.17195e-07	3.82688	-2.15591e-07
3.84588	-2.54878e-07	3.83688	-2.23604e-07	3.83688	-2.22e-07
3.85588	-2.61805e-07	3.84688	-2.16493e-07	3.84688	-2.14889e-07
3.86588	-2.54267e-07	3.85688	-2.23177e-07	3.85688	-2.21573e-07
3.87588	-2.615e-07	3.86688	-2.1631e-07	3.86688	-2.14706e-07
3.88588	-2.53962e-07	3.87688	-2.22414e-07	3.87688	-2.2081e-07
3.89588	-2.61836e-07	3.88688	-2.16493e-07	3.88688	-2.14889e-07
3.90588	-2.53718e-07	3.89688	-2.23024e-07	3.89688	-2.2142e-07
3.91588	-2.61713e-07	3.90688	-2.16097e-07	3.90688	-2.14492e-07
3.92588	-2.52894e-07	3.91688	-2.21468e-07	3.91688	-2.19864e-07
3.93588	-2.61134e-07	3.92688	-2.16127e-07	3.92688	-2.14523e-07
3.94588	-2.52467e-07	3.93688	-2.21437e-07	3.93688	-2.19833e-07
3.95588	-2.60737e-07	3.94688	-2.15853e-07	3.94688	-2.14248e-07
3.96588	-2.52192e-07	3.95688	-2.20979e-07	3.95688	-2.19375e-07
3.97588	-2.61317e-07	3.96688	-2.1573e-07	3.96688	-2.14126e-07
3.98588	-2.51338e-07	3.97688	-2.20461e-07	3.97688	-2.18857e-07
3.99588	-2.61134e-07	3.98688	-2.15547e-07	3.98688	-2.13943e-07
4.00588	-2.51185e-07	3.99688	-2.20369e-07	3.99688	-2.18765e-07
4.01588	-2.60096e-07	4.00688	-2.157e-07	4.00688	-2.14096e-07
4.02588	-2.50727e-07	4.01688	-2.20217e-07	4.01688	-2.18612e-07
4.03588	-2.60432e-07	4.02688	-2.15395e-07	4.02688	-2.13791e-07
4.04588	-2.50086e-07	4.03688	-2.19362e-07	4.03688	-2.17758e-07
4.05588	-2.60767e-07	4.04688	-2.15547e-07	4.04688	-2.13943e-07
4.06588	-2.50422e-07	4.05688	-2.19118e-07	4.05688	-2.17514e-07
4.07588	-2.60706e-07	4.06688	-2.15364e-07	4.06688	-2.1376e-07
4.08588	-2.48988e-07	4.07688	-2.18019e-07	4.07688	-2.16415e-07
4.09588	-2.6031e-07	4.08688	-2.15425e-07	4.08688	-2.13821e-07
4.10588	-2.49995e-07	4.09688	-2.17897e-07	4.09688	-2.16293e-07
4.11588	-2.5973e-07	4.10688	-2.14937e-07	4.10688	-2.13333e-07
4.12588	-2.48255e-07	4.11688	-2.1808e-07	4.11688	-2.16476e-07
4.13588	-2.59852e-07	4.12688	-2.14754e-07	4.12688	-2.1315e-07
4.14588	-2.48438e-07	4.13688	-2.17134e-07	4.13688	-2.1553e-07
4.15588	-2.59303e-07	4.14688	-2.1509e-07	4.14688	-2.13485e-07
4.16588	-2.4795e-07	4.15688	-2.16493e-07	4.15688	-2.14889e-07
4.17588	-2.58967e-07	4.16688	-2.14723e-07	4.16688	-2.13119e-07
4.18588	-2.47492e-07	4.17688	-2.16463e-07	4.17688	-2.14859e-07
4.19588	-2.58662e-07	4.18688	-2.14968e-07	4.18688	-2.13363e-07
4.20588	-2.47859e-07	4.19688	-2.16158e-07	4.19688	-2.14554e-07
4.21588	-2.58296e-07	4.20688	-2.14998e-07	4.20688	-2.13394e-07
4.22588	-2.46821e-07	4.21688	-2.15791e-07	4.21688	-2.14187e-07
4.23588	-2.5857e-07	4.22688	-2.14906e-07	4.22688	-2.13302e-07
4.24588	-2.45661e-07	4.23688	-2.15425e-07	4.23688	-2.13821e-07
4.25588	-2.58936e-07	4.24688	-2.14144e-07	4.24688	-2.12539e-07
4.26588	-2.456e-07	4.25688	-2.1451e-07	4.25688	-2.12906e-07
4.27588	-2.58357e-07	4.26688	-2.14235e-07	4.26688	-2.12631e-07
4.28588	-2.45478e-07	4.27688	-2.14083e-07	4.27688	-2.12478e-07
4.29588	-2.57807e-07	4.28688	-2.1454e-07	4.28688	-2.12936e-07
4.30588	-2.4557e-07	4.29688	-2.13808e-07	4.29688	-2.12204e-07
4.31588	-2.57594e-07	4.30688	-2.13899e-07	4.30688	-2.12295e-07
4.32588	-2.45539e-07	4.31688	-2.13197e-07	4.31688	-2.11593e-07
4.33588	-2.57868e-07	4.32688	-2.14174e-07	4.32688	-2.1257e-07
4.34588	-2.44288e-07	4.33688	-2.13411e-07	4.33688	-2.11807e-07
4.35588	-2.57411e-07	4.34688	-2.1451e-07	4.34688	-2.12906e-07
4.36588	-2.438e-07	4.35688	-2.13045e-07	4.35688	-2.11441e-07
4.37588	-2.57105e-07	4.36688	-2.14693e-07	4.36688	-2.13089e-07
4.38588	-2.44044e-07	4.37688	-2.12282e-07	4.37688	-2.10678e-07
4.39588	-2.57044e-07	4.38688	-2.13686e-07	4.38688	-2.12082e-07
4.40588	-2.43342e-07	4.39688	-2.12221e-07	4.39688	-2.10617e-07
4.41588	-2.56739e-07	4.40688	-2.14266e-07	4.40688	-2.12661e-07
4.42588	-2.43861e-07	4.41688	-2.11641e-07	4.41688	-2.10037e-07
4.43588	-2.56525e-07	4.42688	-2.14113e-07	4.42688	-2.12509e-07
4.44588	-2.43037e-07	4.43688	-2.11641e-07	4.43688	-2.10037e-07
4.45588	-2.56709e-07	4.44688	-2.14235e-07	4.44688	-2.12631e-07
4.46588	-2.42854e-07	4.45688	-2.10634e-07	4.45688	-2.0903e-07
4.47588	-2.55488e-07	4.46688	-2.14205e-07	4.46688	-2.126e-07
4.48588	-2.42274e-07	4.47688	-2.10573e-07	4.47688	-2.08969e-07
4.49588	-2.5619e-07	4.48688	-2.1393e-07	4.48688	-2.12326e-07
4.50588	-2.41206e-07	4.49688	-2.10237e-07	4.49688	-2.08633e-07
4.51588	-2.56342e-07	4.50688	-2.13808e-07	4.50688	-2.12204e-07
4.52588	-2.4206e-07	4.51688	-2.0981e-07	4.51688	-2.08206e-07
4.53588	-2.55305e-07	4.52688	-2.14113e-07	4.52688	-2.12509e-07
4.54588	-2.41572e-07	4.53688	-2.09596e-07	4.53688	-2.07992e-07
4.55588	-2.55396e-07	4.54688	-2.13197e-07	4.54688	-2.11593e-07
4.56588	-2.40809e-07	4.55688	-2.09322e-07	4.55688	-2.07718e-07
4.57588	-2.54908e-07	4.56688	-2.14205e-07	4.56688	-2.126e-07
4.58588	-2.4148e-07	4.57688	-2.08864e-07	4.57688	-2.0726e-07
4.59588	-2.55671e-07	4.58688	-2.13869e-07	4.58688	-2.12265e-07
4.60588	-2.40443e-07	4.59688	-2.08772e-07	4.59688	-2.07168e-07
4.61588	-2.55152e-07	4.60688	-2.1393e-07	4.60688	-2.12326e-07
4.62588	-2.40473e-07	4.61688	-2.0865e-07	4.61688	-2.07046e-07
4.63588	-2.54725e-07	4.62688	-2.13747e-07	4.62688	-2.12143e-07
4.64588	-2.39039e-07	4.63688	-2.07582e-07	4.63688	-2.05978e-07
4.65588	-2.55244e-07	4.64688	-2.13594e-07	4.64688	-2.1199e-07
4.66588	-2.39619e-07	4.65688	-2.06789e-07	4.65688	-2.05185e-07
4.67588	-2.54939e-07	4.66688	-2.13594e-07	4.66688	-2.1199e-07
4.68588	-2.38795e-07	4.67688	-2.06697e-07	4.67688	-2.05093e-07
4.69588	-2.54267e-07	4.68688	-2.13197e-07	4.68688	-2.11593e-07
4.70588	-2.38093e-07	4.69688	-2.06606e-07	4.69688	-2.05002e-07
4.71588	-2.54023e-07	4.70688	-2.13716e-07	4.70688	-2.12112e-07
4.72588	-2.38154e-07	4.71688	-2.05873e-07	4.71688	-2.04269e-07
4.73588	-2.54664e-07	4.72688	-2.14205e-07	4.72688	-2.126e-07
4.74588	-2.38551e-07	4.73688	-2.05232e-07	4.73688	-2.03628e-07
4.75588	-2.54328e-07	4.74688	-2.13014e-07	4.74688	-2.1141e-07
4.76588	-2.38154e-07	4.75688	-2.05232e-07	4.75688	-2.03628e-07
4.77588	-2.53901e-07	4.76688	-2.13045e-07	4.76688	-2.11441e-07
4.78588	-2.37147e-07	4.77688	-2.04531e-07	4.77688	-2.02926e-07
4.79588	-2.53687e-07	4.78688	-2.12648e-07	4.78688	-2.11044e-07
4.80588	-2.36872e-07	4.79688	-2.04531e-07	4.79688	-2.02926e-07
4.81588	-2.53535e-07	4.80688	-2.13625e-07	4.80688	-2.12021e-07
4.82588	-2.36903e-07	4.81688	-2.04683e-07	4.81688	-2.03079e-07
4.83588	-2.54237e-07	4.82688	-2.13411e-07	4.82688	-2.11807e-07
4.84588	-2.3614e-07	4.83688	-2.04042e-07	4.83688	-2.02438e-07
4.85588	-2.54145e-07	4.84688	-2.13289e-07	4.84688	-2.11685e-07
4.86588	-2.35621e-07	4.85688	-2.03737e-07	4.85688	-2.02133e-07
4.87588	-2.53504e-07	4.86688	-2.13228e-07	4.86688	-2.11624e-07
4.88588	-2.34919e-07	4.87688	-2.02608e-07	4.87688	-2.01004e-07
4.89588	-2.53108e-07	4.88688	-2.1335e-07	4.88688	-2.11746e-07
4.90588	-2.35438e-07	4.89688	-2.02699e-07	4.89688	-2.01095e-07
4.91588	-2.52436e-07	4.90688	-2.12984e-07	4.90688	-2.1138e-07
4.92588	-2.35072e-07	4.91688	-2.02516e-07	4.91688	-2.00912e-07
4.93588	-2.53535e-07	4.92688	-2.13716e-07	4.92688	-2.12112e-07
4.94588	-2.34309e-07	4.93688	-2.02486e-07	4.93688	-2.00882e-07
4.95588	-2.53016e-07	4.94688	-2.13228e-07	4.94688	-2.11624e-07
4.96588	-2.34766e-07	4.95688	-2.01875e-07	4.95688	-2.00271e-07
4.97588	-2.53748e-07	4.96688	-2.12831e-07	4.96688	-2.11227e-07
4.98588	-2.34278e-07	4.97688	-2.01662e-07	4.97688	-2.00058e-07
4.99588	-2.52802e-07	4.98688	-2.13014e-07	4.98688	-2.1141e-07
5.00588	-2.34065e-07	4.99688	-2.00868e-07	4.99688	-1.99264e-07
5.01588	-2.52741e-07	5.00688	-2.12618e-07	5.00688	-2.11013e-07
5.02588	-2.32783e-07	5.01688	-2.01357e-07	5.01688	-1.99753e-07
5.03588	-2.52863e-07	5.02688	-2.12709e-07	5.02688	-2.11105e-07
5.04588	-2.33302e-07	5.03688	-2.00929e-07	5.03688	-1.99325e-07
5.05588	-2.52833e-07	5.04688	-2.12953e-07	5.04688	-2.11349e-07
5.06588	-2.32508e-07	5.05688	-2.01113e-07	5.05688	-1.99508e-07
5.07588	-2.53138e-07	5.06688	-2.12831e-07	5.06688	-2.11227e-07
5.08588	-2.32203e-07	5.07688	-2.00319e-07	5.07688	-1.98715e-07
5.09588	-2.51917e-07	5.08688	-2.12801e-07	5.08688	-2.11197e-07
5.10588	-2.32172e-07	5.09688	-1.99526e-07	5.09688	-1.97921e-07
5.11588	-2.5268e-07	5.10688	-2.12587e-07	5.10688	-2.10983e-07
5.12588	-2.31959e-07	5.11688	-1.99312e-07	5.11688	-1.97708e-07
5.13588	-2.53291e-07	5.12688	-2.12312e-07	5.12688	-2.10708e-07
5.14588	-2.31196e-07	5.13688	-1.99007e-07	5.13688	-1.97403e-07
5.15588	-2.52253e-07	5.14688	-2.12435e-07	5.14688	-2.1083e-07
5.16588	-2.30799e-07	5.15688	-1.99129e-07	5.15688	-1.97525e-07
5.17588	-2.52161e-07	5.16688	-2.12587e-07	5.16688	-2.10983e-07
5.18588	-2.30708e-07	5.17688	-1.98854e-07	5.17688	-1.9725e-07
5.19588	-2.52985e-07	5.18688	-2.12282e-07	5.18688	-2.10678e-07
5.20588	-2.30189e-07	5.19688	-1.98763e-07	5.19688	-1.97159e-07
5.21588	-2.52284e-07	5.20688	-2.12404e-07	5.20688	-2.108e-07
5.22588	-2.30586e-07	5.21688	-1.98091e-07	5.21688	-1.96487e-07
5.23588	-2.52619e-07	5.22688	-2.11916e-07	5.22688	-2.10312e-07
5.24588	-2.30158e-07	5.23688	-1.98274e-07	5.23688	-1.9667e-07
5.25588	-2.51917e-07	5.24688	-2.12007e-07	5.24688	-2.10403e-07
5.26588	-2.29578e-07	5.25688	-1.97511e-07	5.25688	-1.95907e-07
5.27588	-2.52009e-07	5.26688	-2.11946e-07	5.26688	-2.10342e-07
5.28588	-2.29456e-07	5.27688	-1.97695e-07	5.27688	-1.9609e-07
5.29588	-2.52253e-07	5.28688	-2.12343e-07	5.28688	-2.10739e-07
5.30588	-2.2906e-07	5.29688	-1.97817e-07	5.29688	-1.96212e-07
5.31588	-2.52467e-07	5.30688	-2.12435e-07	5.30688	-2.1083e-07
5.32588	-2.28846e-07	5.31688	-1.97389e-07	5.31688	-1.95785e-07
5.33588	-2.51276e-07	5.32688	-2.1216e-07	5.32688	-2.10556e-07
5.34588	-2.28846e-07	5.33688	-1.96382e-07	5.33688	-1.94778e-07
5.35588	-2.51673e-07	5.34688	-2.12343e-07	5.34688	-2.10739e-07
5.36588	-2.28785e-07	5.35688	-1.9626e-07	5.35688	-1.94656e-07
5.37588	-2.50941e-07	5.36688	-2.11397e-07	5.36688	-2.09793e-07
5.38588	-2.27778e-07	5.37688	-1.96504e-07	5.37688	-1.949e-07
5.39588	-2.51765e-07	5.38688	-2.12099e-07	5.38688	-2.10495e-07
5.40588	-2.27992e-07	5.39688	-1.95802e-07	5.39688	-1.94198e-07
5.41588	-2.51704e-07	5.40688	-2.11733e-07	5.40688	-2.10128e-07
5.42588	-2.27473e-07	5.41688	-1.95894e-07	5.41688	-1.9429e-07
5.43588	-2.51399e-07	5.42688	-2.11458e-07	5.42688	-2.09854e-07
5.44588	-2.27259e-07	5.43688	-1.95101e-07	5.43688	-1.93496e-07
5.45588	-2.51399e-07	5.44688	-2.11885e-07	5.44688	-2.10281e-07
5.46588	-2.27381e-07	5.45688	-1.95192e-07	5.45688	-1.93588e-07
5.47588	-2.5146e-07	5.46688	-2.11763e-07	5.46688	-2.10159e-07
5.48588	-2.26893e-07	5.47688	-1.95314e-07	5.47688	-1.9371e-07
5.49588	-2.51399e-07	5.48688	-2.11244e-07	5.48688	-2.0964e-07
5.50588	-2.26954e-07	5.49688	-1.94795e-07	5.49688	-1.93191e-07
5.51588	-2.5091e-07	5.50688	-2.11702e-07	5.50688	-2.10098e-07
5.52588	-2.26527e-07	5.51688	-1.94795e-07	5.51688	-1.93191e-07
5.53588	-2.50636e-07	5.52688	-2.11183e-07	5.52688	-2.09579e-07
5.54588	-2.26283e-07	5.53688	-1.94338e-07	5.53688	-1.92733e-07
5.55588	-2.50971e-07	5.54688	-2.11031e-07	5.54688	-2.09427e-07
5.56588	-2.25947e-07	5.55688	-1.94704e-07	5.55688	-1.931e-07
5.57588	-2.50391e-07	5.56688	-2.11427e-07	5.56688	-2.09823e-07
5.58588	-2.25855e-07	5.57688	-1.93849e-07	5.57688	-1.92245e-07
5.59588	-2.49903e-07	5.58688	-2.11275e-07	5.58688	-2.09671e-07
5.60588	-2.25275e-07	5.59688	-1.93453e-07	5.59688	-1.91848e-07
5.61588	-2.50849e-07	5.60688	-2.1158e-07	5.60688	-2.09976e-07
5.62588	-2.25123e-07	5.61688	-1.93361e-07	5.61688	-1.91757e-07
5.63588	-2.49659e-07	5.62688	-2.11458e-07	5.62688	-2.09854e-07
5.64588	-2.25367e-07	5.63688	-1.93178e-07	5.63688	-1.91574e-07
5.65588	-2.49751e-07	5.64688	-2.11183e-07	5.64688	-2.09579e-07
5.66588	-2.25001e-07	5.65688	-1.92629e-07	5.65688	-1.91024e-07
5.67588	-2.49659e-07	5.66688	-2.11519e-07	5.66688	-2.09915e-07
5.68588	-2.24848e-07	5.67688	-1.92171e-07	5.67688	-1.90567e-07
5.69588	-2.50147e-07	5.68688	-2.11e-07	5.68688	-2.09396e-07
5.70588	-2.24543e-07	5.69688	-1.92232e-07	5.69688	-1.90628e-07
5.71588	-2.50452e-07	5.70688	-2.11458e-07	5.70688	-2.09854e-07
5.72588	-2.24635e-07	5.71688	-1.92171e-07	5.71688	-1.90567e-07
5.73588	-2.50269e-07	5.72688	-2.11366e-07	5.72688	-2.09762e-07
5.74588	-2.24177e-07	5.73688	-1.92385e-07	5.73688	-1.9078e-07
5.75588	-2.49934e-07	5.74688	-2.10756e-07	5.74688	-2.09152e-07
5.76588	-2.24055e-07	5.75688	-1.91561e-07	5.75688	-1.89956e-07
5.77588	-2.49415e-07	5.76688	-2.11061e-07	5.76688	-2.09457e-07
5.78588	-2.23994e-07	5.77688	-1.91225e-07	5.77688	-1.89621e-07
5.88617	2.45722e-06	5.87691	2.33575e-06	5.87691	2.33736e-06
5.98617	1.34089e-06	5.97691	1.26428e-06	5.97691	1.26588e-06
6.08617	9.84136e-07	6.07691	9.23399e-07	6.07691	9.25003e-07
6.18617	8.12627e-07	6.17691	7.5952e-07	6.17691	7.61124e-07
6.28617	7.09173e-07	6.27691	6.61558e-07	6.27691	6.63163e-07
6.38617	6.36236e-07	6.37691	5.9503e-07	6.37691	5.96634e-07
6.48617	5.82525e-07	6.47691	5.44676e-07	6.47691	5.4628e-07
6.58617	5.3919e-07	6.57691	5.05919e-07	6.57691	5.07523e-07
6.68617	5.044e-07	6.67691	4.73875e-07	6.67691	4.75479e-07
6.78617	4.75103e-07	6.77691	4.47325e-07	6.77691	4.48929e-07
6.88617	4.50384e-07	6.87691	4.24132e-07	6.87691	4.25736e-07
6.98617	4.27801e-07	6.97691	4.05211e-07	6.97691	4.06815e-07
7.08617	4.09185e-07	7.07691	3.88121e-07	7.07691	3.89725e-07
7.18617	3.92705e-07	7.17691	3.73472e-07	7.17691	3.75077e-07
7.28617	3.77447e-07	7.27691	3.58824e-07	7.27691	3.60428e-07
7.38617	3.64019e-07	7.37691	3.46922e-07	7.37691	3.48526e-07
7.48617	3.51812e-07	7.47691	3.35631e-07	7.47691	3.37235e-07
7.58617	3.393e-07	7.57691	3.25865e-07	7.57691	3.27469e-07
7.68617	3.28924e-07	7.67691	3.15184e-07	7.67691	3.16788e-07
7.78617	3.19158e-07	7.77691	3.06334e-07	7.77691	3.07938e-07
7.88617	3.10613e-07	7.87691	2.9901e-07	7.87691	3.00614e-07
7.98617	3.01763e-07	7.97691	2.9138e-07	7.97691	2.92984e-07
8.08617	2.94439e-07	8.07691	2.84361e-07	8.07691	2.85965e-07
8.18617	2.86504e-07	8.17691	2.77647e-07	8.17691	2.79251e-07
8.28617	2.80401e-07	8.27691	2.71849e-07	8.27691	2.73453e-07
8.38617	2.74297e-07	8.37691	2.66356e-07	8.37691	2.6796e-07
8.48617	2.67278e-07	8.47691	2.60252e-07	8.47691	2.61856e-07
8.58617	2.61785e-07	8.57691	2.5598e-07	8.57691	2.57584e-07
8.68617	2.56902e-07	8.67691	2.50487e-07	8.67691	2.52091e-07
8.78617	2.51409e-07	8.77691	2.46214e-07	8.77691	2.47818e-07
8.88617	2.46831e-07	8.87691	2.42247e-07	8.87691	2.43851e-07
8.98617	2.41033e-07	8.97691	2.37364e-07	8.97691	2.38968e-07
9.08617	2.37371e-07	9.07691	2.33397e-07	9.07691	2.35001e-07
9.18617	2.32488e-07	9.17691	2.29063e-07	9.17691	2.30667e-07
9.28617	2.28826e-07	9.27691	2.25157e-07	9.27691	2.26761e-07
9.38617	2.25164e-07	9.37691	2.2119e-07	9.37691	2.22794e-07
9.48617	2.21502e-07	9.47691	2.18931e-07	9.47691	2.20536e-07
9.58617	2.1784e-07	9.57691	2.15574e-07	9.57691	2.17179e-07
9.68617	2.14178e-07	9.67691	2.11851e-07	9.67691	2.13456e-07
9.78617	2.11431e-07	9.77691	2.09288e-07	9.77691	2.10892e-07
9.88617	2.08379e-07	9.87691	2.06236e-07	9.87691	2.0784e-07
9.98617	2.05633e-07	9.97691	2.0349e-07	9.97691	2.05094e-07
10.0862	2.02886e-07	10.0769	2.00438e-07	10.0769	2.02042e-07
10.1862	1.99834e-07	10.1769	1.98424e-07	10.1769	2.00028e-07
10.2862	1.97088e-07	10.2769	1.95585e-07	10.2769	1.9719e-07
10.3862	1.93731e-07	10.3769	1.92564e-07	10.3769	1.94168e-07
10.4862	1.91412e-07	10.4769	1.90245e-07	10.4769	1.91849e-07
10.5862	1.89153e-07	10.5769	1.86857e-07	10.5769	1.88462e-07
10.6862	1.86407e-07	10.6769	1.84813e-07	10.6769	1.86417e-07
10.7862	1.8366e-07	10.7769	1.81608e-07	10.7769	1.83213e-07
10.8862	1.81402e-07	10.8769	1.79686e-07	10.8769	1.8129e-07
10.9862	1.80212e-07	10.9769	1.78038e-07	10.9769	1.79642e-07
11.0862	1.77404e-07	11.0769	1.76359e-07	11.0769	1.77964e-07
11.1862	1.75115e-07	11.1769	1.74406e-07	11.1769	1.7601e-07
11.2862	1.72857e-07	11.2769	1.72697e-07	11.2769	1.74301e-07
11.3862	1.71239e-07	11.3769	1.70378e-07	11.3769	1.71982e-07
11.4862	1.69103e-07	11.4769	1.69035e-07	11.4769	1.70639e-07
11.5862	1.67181e-07	11.5769	1.67387e-07	11.5769	1.68991e-07
11.6862	1.66112e-07	11.6769	1.66289e-07	11.6769	1.67893e-07
11.7862	1.64892e-07	11.7769	1.64366e-07	11.7769	1.6597e-07
11.8862	1.63244e-07	11.8769	1.6284e-07	11.8769	1.64444e-07
11.9862	1.6123e-07	11.9769	1.61619e-07	11.9769	1.63224e-07
12.0862	1.59582e-07	12.0769	1.5988e-07	12.0769	1.61484e-07
12.1862	1.57995e-07	12.1769	1.58568e-07	12.1769	1.60172e-07
12.2862	1.5592e-07	12.2769	1.57255e-07	12.2769	1.5886e-07
12.3862	1.54211e-07	12.3769	1.54692e-07	12.3769	1.56296e-07
12.4862	1.52502e-07	12.4769	1.53441e-07	12.4769	1.55045e-07
12.5862	1.50762e-07	12.5769	1.52098e-07	12.5769	1.53702e-07
12.6862	1.48931e-07	12.6769	1.5106e-07	12.6769	1.52664e-07
12.7862	1.47924e-07	12.7769	1.49382e-07	12.7769	1.50986e-07
12.8862	1.46551e-07	12.8769	1.48009e-07	12.8769	1.49613e-07
12.9862	1.4533e-07	12.9769	1.46727e-07	12.9769	1.48331e-07
13.0862	1.44079e-07	13.0769	1.45231e-07	13.0769	1.46836e-07
13.1862	1.43316e-07	13.1769	1.43675e-07	13.1769	1.45279e-07
13.2862	1.42614e-07	13.2769	1.43431e-07	13.2769	1.45035e-07
13.3862	1.41576e-07	13.3769	1.43126e-07	13.3769	1.4473e-07
13.4862	1.41119e-07	13.4769	1.41661e-07	13.4769	1.43265e-07
13.5862	1.40081e-07	13.5769	1.40349e-07	13.5769	1.41953e-07
13.6862	1.39135e-07	13.6769	1.39219e-07	13.6769	1.40824e-07
13.7862	1.38921e-07	13.7769	1.37816e-07	13.7769	1.3942e-07
13.8862	1.3651e-07	13.8769	1.36992e-07	13.8769	1.38596e-07
13.9862	1.34862e-07	13.9769	1.35924e-07	13.9769	1.37528e-07
14.0862	1.341e-07	14.0769	1.34215e-07	14.0769	1.35819e-07
14.1862	1.33184e-07	14.1769	1.32872e-07	14.1769	1.34476e-07
14.2862	1.31811e-07	14.2769	1.31804e-07	14.2769	1.33408e-07
14.3862	1.31719e-07	14.3769	1.31132e-07	14.3769	1.32737e-07
14.4862	1.30712e-07	14.4769	1.30827e-07	14.4769	1.32431e-07
14.5862	1.30651e-07	14.5769	1.29942e-07	14.5769	1.31546e-07
14.6862	1.29034e-07	14.6769	1.29545e-07	14.6769	1.3115e-07
14.7862	1.27325e-07	14.7769	1.28538e-07	14.7769	1.30143e-07
14.8862	1.27233e-07	14.8769	1.26921e-07	14.8769	1.28525e-07
14.9862	1.25982e-07	14.9769	1.25944e-07	14.9769	1.27549e-07
15.0862	1.25188e-07	15.0769	1.25059e-07	15.0769	1.26664e-07
15.1862	1.24029e-07	15.1769	1.24296e-07	15.1769	1.25901e-07
15.2862	1.23357e-07	15.2769	1.23289e-07	15.2769	1.24893e-07
15.3862	1.22198e-07	15.3769	1.22252e-07	15.3769	1.23856e-07
15.4862	1.21465e-07	15.4769	1.21886e-07	15.4769	1.2349e-07
15.5862	1.20306e-07	15.5769	1.21001e-07	15.5769	1.22605e-07
15.6862	1.19695e-07	15.6769	1.20604e-07	15.6769	1.22208e-07
15.7862	1.18658e-07	15.7769	1.20543e-07	15.7769	1.22147e-07
15.8862	1.18444e-07	15.8769	1.1981e-07	15.8769	1.21414e-07
15.9862	1.17284e-07	15.9769	1.19322e-07	15.9769	1.20926e-07
16.0862	1.16766e-07	16.0769	1.18529e-07	16.0769	1.20133e-07
16.1862	1.16064e-07	16.1769	1.18498e-07	16.1769	1.20102e-07
16.2862	1.15636e-07	16.2769	1.18193e-07	16.2769	1.19797e-07
16.3862	1.1585e-07	16.3769	1.16698e-07	16.3769	1.18302e-07
16.4862	1.14172e-07	16.4769	1.16362e-07	16.4769	1.17966e-07
16.5862	1.1292e-07	16.5769	1.16026e-07	16.5769	1.1763e-07
16.6862	1.12524e-07	16.6769	1.14744e-07	16.6769	1.16349e-07
16.7862	1.12218e-07	16.7769	1.14348e-07	16.7769	1.15952e-07
16.8862	1.11333e-07	16.8769	1.14104e-07	16.8769	1.15708e-07
16.9862	1.10754e-07	16.9769	1.13371e-07	16.9769	1.14975e-07
17.0862	1.10357e-07	17.0769	1.12395e-07	17.0769	1.13999e-07
17.1862	1.10204e-07	17.1769	1.11693e-07	17.1769	1.13297e-07
17.2862	1.08892e-07	17.2769	1.10716e-07	17.2769	1.1232e-07
17.3862	1.09075e-07	17.3769	1.10686e-07	17.3769	1.1229e-07
17.4862	1.09106e-07	17.4769	1.10045e-07	17.4769	1.11649e-07
17.5862	1.07366e-07	17.5769	1.09648e-07	17.5769	1.11252e-07
17.6862	1.06603e-07	17.6769	1.08885e-07	17.6769	1.10489e-07
17.7862	1.0639e-07	17.7769	1.08549e-07	17.7769	1.10154e-07
17.8862	1.05505e-07	17.8769	1.08336e-07	17.8769	1.0994e-07
17.9862	1.04436e-07	17.9769	1.07969e-07	17.9769	1.09574e-07
18.0862	1.04192e-07	18.0769	1.07542e-07	18.0769	1.09146e-07
18.1862	1.04009e-07	18.1769	1.06444e-07	18.1769	1.08048e-07
18.2862	1.03673e-07	18.2769	1.06291e-07	18.2769	1.07895e-07
18.3862	1.02697e-07	18.3769	1.05711e-07	18.3769	1.07315e-07
18.4862	1.02911e-07	18.4769	1.05772e-07	18.4769	1.07376e-07
18.5862	1.02392e-07	18.5769	1.04155e-07	18.5769	1.05759e-07
18.6862	1.00866e-07	18.6769	1.04277e-07	18.6769	1.05881e-07
18.7862	1.00805e-07	18.7769	1.0385e-07	18.7769	1.05454e-07
18.8862	1.005e-07	18.8769	1.03392e-07	18.8769	1.04996e-07
18.9862	1.00194e-07	18.9769	1.0269e-07	18.9769	1.04294e-07
19.0862	9.99198e-08	19.0769	1.02598e-07	19.0769	1.04203e-07
19.1862	9.94926e-08	19.1769	1.02202e-07	19.1769	1.03806e-07
19.2862	9.87602e-08	19.2769	1.01835e-07	19.2769	1.0344e-07
19.3862	9.83939e-08	19.3769	1.00615e-07	19.3769	1.02219e-07
19.4862	9.83329e-08	19.4769	1.00554e-07	19.4769	1.02158e-07
19.5862	9.80277e-08	19.5769	1.00279e-07	19.5769	1.01883e-07
19.6862	9.72343e-08	19.6769	1.0031e-07	19.6769	1.01914e-07
19.7862	9.68681e-08	19.7769	9.95772e-08	19.7769	1.01181e-07
19.8862	9.61356e-08	19.8769	9.86922e-08	19.8769	1.00296e-07
19.9862	9.53422e-08	19.9769	9.83565e-08	19.9769	9.99606e-08
20.0862	9.52506e-08	20.0769	9.76546e-08	20.0769	9.92587e-08
20.1862	9.49149e-08	20.1769	9.69832e-08	20.1769	9.85873e-08
20.2862	9.43656e-08	20.2769	9.69221e-08	20.2769	9.85263e-08
20.3862	9.47929e-08	20.3769	9.61592e-08	20.3769	9.77634e-08
20.4862	9.38468e-08	20.4769	9.57319e-08	20.4769	9.73361e-08
20.5862	9.34806e-08	20.5769	9.56099e-08	20.5769	9.7214e-08
20.6862	9.28703e-08	20.6769	9.51521e-08	20.6769	9.67563e-08
20.7862	9.20158e-08	20.7769	9.4969e-08	20.7769	9.65732e-08
20.8862	9.21378e-08	20.8769	9.503e-08	20.8769	9.66342e-08
20.9862	9.0673e-08	20.9769	9.43892e-08	20.9769	9.59933e-08
21.0862	9.04594e-08	21.0769	9.39314e-08	21.0769	9.55356e-08
21.1862	9.07035e-08	21.1769	9.30464e-08	21.1769	9.46506e-08
21.2862	9.03678e-08	21.2769	9.28633e-08	21.2769	9.44675e-08
21.3862	8.96354e-08	21.3769	9.28023e-08	21.3769	9.44064e-08
21.4862	8.8964e-08	21.4769	9.19783e-08	21.4769	9.35825e-08
21.5862	8.88114e-08	21.5769	9.15205e-08	21.5769	9.31247e-08
21.6862	8.81706e-08	21.6769	9.12459e-08	21.6769	9.285e-08
21.7862	8.75602e-08	21.7769	9.09102e-08	21.7769	9.25143e-08
21.8862	8.73466e-08	21.8769	9.00862e-08	21.8769	9.16904e-08
21.9862	8.75907e-08	21.9769	8.94758e-08	21.9769	9.108e-08
22.0862	8.65226e-08	22.0769	8.98726e-08	22.0769	9.14767e-08
22.1862	8.68583e-08	22.1769	8.94453e-08	22.1769	9.10495e-08
22.2862	8.62479e-08	22.2769	8.89265e-08	22.2769	9.05307e-08
22.3862	8.60038e-08	22.3769	8.87434e-08	22.3769	9.03476e-08
22.4862	8.60648e-08	22.4769	8.81331e-08	22.4769	8.97372e-08
22.5862	8.59428e-08	22.5769	8.83162e-08	22.5769	8.99203e-08
22.6862	8.52103e-08	22.6769	8.82857e-08	22.6769	8.98898e-08
22.7862	8.48136e-08	22.7769	8.79805e-08	22.7769	8.95847e-08
22.8862	8.42643e-08	22.8769	8.73091e-08	22.8769	8.89133e-08
22.9862	8.39896e-08	22.9769	8.64851e-08	22.9769	8.80893e-08
23.0862	8.36234e-08	23.0769	8.5478e-08	23.0769	8.70822e-08
23.1862	8.27689e-08	23.1769	8.45625e-08	23.1769	8.61667e-08
23.2862	8.19755e-08	23.2769	8.43489e-08	23.2769	8.59531e-08
23.3862	8.17619e-08	23.3769	8.42268e-08	23.3769	8.5831e-08
23.4862	8.18534e-08	23.4769	8.35249e-08	23.4769	8.51291e-08
23.5862	8.20365e-08	23.5769	8.29146e-08	23.5769	8.45187e-08
23.6862	8.08463e-08	23.6769	8.33418e-08	23.6769	8.4946e-08
23.7862	8.07548e-08	23.7769	8.27925e-08	23.7769	8.43967e-08
23.8862	8.04801e-08	23.8769	8.27925e-08	23.8769	8.43967e-08
23.9862	8.04191e-08	23.9769	8.30977e-08	23.9769	8.47018e-08
24.0862	7.95951e-08	24.0769	8.27315e-08	24.0769	8.43356e-08
24.1862	7.98087e-08	24.1769	8.26704e-08	24.1769	8.42746e-08
24.2862	7.91068e-08	24.2769	8.23652e-08	24.2769	8.39694e-08
24.3862	7.83439e-08	24.3769	8.16328e-08	24.3769	8.3237e-08
24.4862	7.92594e-08	24.4769	8.10225e-08	24.4769	8.26266e-08
24.5862	7.82523e-08	24.5769	8.12361e-08	24.5769	8.28403e-08
24.6862	7.87711e-08	24.6769	8.08394e-08	24.6769	8.24435e-08
24.7862	7.86491e-08	24.7769	8.10225e-08	24.7769	8.26266e-08
24.8862	7.83744e-08	24.8769	8.03511e-08	24.8769	8.19553e-08
24.9862	7.73978e-08	24.9769	7.96492e-08	24.9769	8.12534e-08
25.0862	7.70316e-08	25.0769	8.01375e-08	25.0769	8.17416e-08
25.1862	7.58109e-08	25.1769	7.96492e-08	25.1769	8.12534e-08
25.2862	7.58109e-08	25.2769	7.89168e-08	25.2769	8.05209e-08
25.3862	7.55973e-08	25.3769	7.79402e-08	25.3769	7.95444e-08
25.4862	7.52006e-08	25.4769	7.80318e-08	25.4769	7.96359e-08
25.5862	7.44071e-08	25.5769	7.82454e-08	25.5769	7.98495e-08
25.6862	7.47123e-08	25.6769	7.79402e-08	25.6769	7.95444e-08
25.7862	7.45902e-08	25.7769	7.78792e-08	25.7769	7.94833e-08
25.8862	7.47123e-08	25.8769	7.77876e-08	25.8769	7.93918e-08
25.9862	7.37968e-08	25.9769	7.68721e-08	25.9769	7.84763e-08
26.0862	7.37968e-08	26.0769	7.71467e-08	26.0769	7.87509e-08
26.1862	7.30033e-08	26.1769	7.68721e-08	26.1769	7.84763e-08
26.2862	7.30338e-08	26.2769	7.68416e-08	26.2769	7.84457e-08
26.3862	7.30033e-08	26.3769	7.62923e-08	26.3769	7.78964e-08
26.4862	7.27897e-08	26.4769	7.62312e-08	26.4769	7.78354e-08
26.5862	7.22099e-08	26.5769	7.5865e-08	26.5769	7.74692e-08
26.6862	7.18131e-08	26.6769	7.54683e-08	26.6769	7.70724e-08
26.7862	7.12333e-08	26.7769	7.51631e-08	26.7769	7.67673e-08
26.8862	7.11723e-08	26.8769	7.57124e-08	26.8769	7.73166e-08
26.9862	7.08671e-08	26.9769	7.51326e-08	26.9769	7.67368e-08
27.0862	7.09586e-08	27.0769	7.46748e-08	27.0769	7.6279e-08
27.1862	6.986e-08	27.1769	7.45833e-08	27.1769	7.61874e-08
27.2862	7.02567e-08	27.2769	7.43696e-08	27.2769	7.59738e-08
27.3862	6.93107e-08	27.3769	7.41865e-08	27.3769	7.57907e-08
27.4862	7.01347e-08	27.4769	7.36067e-08	27.4769	7.52109e-08
27.5862	7.03483e-08	27.5769	7.33015e-08	27.5769	7.49057e-08
27.6862	6.95243e-08	27.6769	7.28743e-08	27.6769	7.44785e-08
27.7862	6.91276e-08	27.7769	7.28438e-08	27.7769	7.44479e-08
27.8862	6.94633e-08	27.8769	7.33626e-08	27.8769	7.49667e-08
27.9862	6.96159e-08	27.9769	7.30574e-08	27.9769	7.46616e-08
28.0862	7.02567e-08	28.0769	7.23555e-08	28.0769	7.39597e-08
28.1862	6.94022e-08	28.1769	7.12569e-08	28.1769	7.2861e-08
28.2862	6.94328e-08	28.2769	7.19588e-08	28.2769	7.35629e-08
28.3862	6.85477e-08	28.3769	7.14705e-08	28.3769	7.30746e-08
28.4862	6.77848e-08	28.4769	7.09517e-08	28.4769	7.25558e-08
28.5862	6.81815e-08	28.5769	7.11348e-08	28.5769	7.2739e-08
28.6862	6.85172e-08	28.6769	7.10737e-08	28.6769	7.26779e-08
28.7862	6.76322e-08	28.7769	7.0677e-08	28.7769	7.22812e-08
28.8862	6.69303e-08	28.8769	7.08296e-08	28.8769	7.24338e-08
28.9862	6.69914e-08	28.9769	7.01887e-08	28.9769	7.17929e-08
29.0862	6.7327e-08	29.0769	7.01277e-08	29.0769	7.17319e-08
29.1862	6.72965e-08	29.1769	6.92732e-08	29.1769	7.08774e-08
29.2862	6.79984e-08	29.2769	6.8846e-08	29.2769	7.04501e-08
29.3862	6.75712e-08	29.3769	6.92122e-08	29.3769	7.08163e-08
29.4862	6.632e-08	29.4769	6.88765e-08	29.4769	7.04806e-08
29.5862	6.71745e-08	29.5769	6.84187e-08	29.5769	7.00229e-08
29.6862	6.65031e-08	29.6769	6.86018e-08	29.6769	7.0206e-08
29.7862	6.632e-08	29.7769	6.82966e-08	29.7769	6.99008e-08
29.8862	6.63505e-08	29.8769	6.76253e-08	29.8769	6.92294e-08
29.9862	6.59232e-08	29.9769	6.77473e-08	29.9769	6.93515e-08
30.0862	6.54044e-08	30.0769	6.78084e-08	30.0769	6.94125e-08
30.1862	6.53434e-08	30.1769	6.77778e-08	30.1769	6.9382e-08
30.2862	6.48856e-08	30.2769	6.74116e-08	30.2769	6.90158e-08
30.3862	6.46415e-08	30.3769	6.68623e-08	30.3769	6.84665e-08
30.4862	6.41532e-08	30.4769	6.72896e-08	30.4769	6.88937e-08
30.5862	6.36955e-08	30.5769	6.57942e-08	30.5769	6.73984e-08
30.6862	6.33292e-08	30.6769	6.57942e-08	30.6769	6.73984e-08
30.7862	6.25663e-08	30.7769	6.53364e-08	30.7769	6.69406e-08
30.8862	6.25663e-08	30.8769	6.56416e-08	30.8769	6.72458e-08
30.9862	6.22306e-08	30.9769	6.53364e-08	30.9769	6.69406e-08
31.0862	6.2078e-08	31.0769	6.49092e-08	31.0769	6.65134e-08
31.1862	6.25968e-08	31.1769	6.54585e-08	31.1769	6.70627e-08
31.2862	6.21085e-08	31.2769	6.52144e-08	31.2769	6.68185e-08
31.3862	6.25053e-08	31.3769	6.46345e-08	31.3769	6.62387e-08
31.4862	6.22306e-08	31.4769	6.39021e-08	31.4769	6.55063e-08
31.5862	6.22916e-08	31.5769	6.31087e-08	31.5769	6.47128e-08
31.6862	6.21085e-08	31.6769	6.17659e-08	31.6769	6.33701e-08
31.7862	6.1254e-08	31.7769	6.22236e-08	31.7769	6.38278e-08
31.8862	6.09489e-08	31.8769	6.20405e-08	31.8769	6.36447e-08
31.9862	6.09184e-08	31.9769	6.1949e-08	31.9769	6.35532e-08
32.0862	6.05521e-08	32.0769	6.17964e-08	32.0769	6.34006e-08
32.1862	6.04911e-08	32.1769	6.19795e-08	32.1769	6.35837e-08
32.2862	5.9423e-08	32.2769	6.1888e-08	32.2769	6.34921e-08
32.3862	6.00028e-08	32.3769	6.09114e-08	32.3769	6.25156e-08
32.4862	6.00944e-08	32.4769	6.07893e-08	32.4769	6.23935e-08
32.5862	5.95145e-08	32.5769	6.06367e-08	32.5769	6.22409e-08
32.6862	6.03996e-08	32.6769	6.03316e-08	32.6769	6.19357e-08
32.7862	5.95145e-08	32.7769	6.03621e-08	32.7769	6.19662e-08
32.8862	5.91483e-08	32.8769	5.97212e-08	32.8769	6.13254e-08
32.9862	5.88737e-08	32.9769	5.95076e-08	32.9769	6.11118e-08
33.0862	5.9362e-08	33.0769	6.08504e-08	33.0769	6.24545e-08
33.1862	5.89652e-08	33.1769	6.06367e-08	33.1769	6.22409e-08
33.2862	5.85685e-08	33.2769	6.05452e-08	33.2769	6.21494e-08
33.3862	5.83549e-08	33.3769	6.00874e-08	33.3769	6.16916e-08
33.4862	5.89957e-08	33.4769	6.07893e-08	33.4769	6.23935e-08
33.5862	5.8599e-08	33.5769	5.99959e-08	33.5769	6.16e-08
33.6862	5.89347e-08	33.6769	5.98433e-08	33.6769	6.14474e-08
33.7862	5.76225e-08	33.7769	5.99653e-08	33.7769	6.15695e-08
33.8862	5.79887e-08	33.8769	6.01179e-08	33.8769	6.17221e-08
33.9862	5.77445e-08	33.9769	6.04536e-08	33.9769	6.20578e-08
34.0862	5.86906e-08	34.0769	6.1064e-08	34.0769	6.26681e-08
34.1862	5.71342e-08	34.1769	6.04536e-08	34.1769	6.20578e-08
34.2862	5.71342e-08	34.2769	6.04536e-08	34.2769	6.20578e-08
34.3862	5.70426e-08	34.3769	6.06673e-08	34.3769	6.22714e-08
34.4862	5.6829e-08	34.4769	5.99043e-08	34.4769	6.15085e-08
34.5862	5.74699e-08	34.5769	5.91414e-08	34.5769	6.07455e-08
34.6862	5.63102e-08	34.6769	5.87446e-08	34.6769	6.03488e-08
34.7862	5.68595e-08	34.7769	5.87752e-08	34.7769	6.03793e-08
34.8862	5.5944e-08	34.8769	5.81648e-08	34.8769	5.9769e-08
34.9862	5.55473e-08	34.9769	5.8531e-08	34.9769	6.01352e-08
35.0862	5.53642e-08	35.0769	5.84395e-08	35.0769	6.00436e-08
35.1862	5.57304e-08	35.1769	5.86531e-08	35.1769	6.02573e-08
35.2862	5.53642e-08	35.2769	5.847e-08	35.2769	6.00742e-08
35.3862	5.56388e-08	35.3769	5.77376e-08	35.3769	5.93417e-08
35.4862	5.56083e-08	35.4769	5.71272e-08	35.4769	5.87314e-08
35.5862	5.53642e-08	35.5769	5.70357e-08	35.5769	5.86398e-08
35.6862	5.43571e-08	35.6769	5.70051e-08	35.6769	5.86093e-08
35.7862	5.512e-08	35.7769	5.69136e-08	35.7769	5.85178e-08
35.8862	5.4235e-08	35.8769	5.62117e-08	35.8769	5.78159e-08
35.9862	5.37162e-08	35.9769	5.62117e-08	35.9769	5.78159e-08
36.0862	5.30448e-08	36.0769	5.60896e-08	36.0769	5.76938e-08
36.1862	5.48148e-08	36.1769	5.62727e-08	36.1769	5.78769e-08
36.2862	5.42655e-08	36.2769	5.65474e-08	36.2769	5.81515e-08
36.3862	5.39603e-08	36.3769	5.62422e-08	36.3769	5.78464e-08
36.4862	5.35331e-08	36.4769	5.59065e-08	36.4769	5.75107e-08
36.5862	5.26481e-08	36.5769	5.5876e-08	36.5769	5.74802e-08
36.6862	5.32279e-08	36.6769	5.61812e-08	36.6769	5.77853e-08
36.7862	5.29533e-08	36.7769	5.53877e-08	36.7769	5.69919e-08
36.8862	5.20072e-08	36.8769	5.53572e-08	36.8769	5.69614e-08
36.9862	5.25565e-08	36.9769	5.50825e-08	36.9769	5.66867e-08
37.0862	5.24039e-08	37.0769	5.46248e-08	37.0769	5.62289e-08
37.1862	5.23734e-08	37.1769	5.46553e-08	37.1769	5.62595e-08
37.2862	5.20377e-08	37.2769	5.46553e-08	37.2769	5.62595e-08
37.3862	5.24039e-08	37.3769	5.44722e-08	37.3769	5.60764e-08
37.4862	5.23734e-08	37.4769	5.4228e-08	37.4769	5.58322e-08
37.5862	5.2465e-08	37.5769	5.43501e-08	37.5769	5.59543e-08
37.6862	5.20683e-08	37.6769	5.4106e-08	37.6769	5.57101e-08
37.7862	5.23124e-08	37.7769	5.43806e-08	37.7769	5.59848e-08
37.8862	5.28312e-08	37.8769	5.43501e-08	37.8769	5.59543e-08
37.9862	5.13358e-08	37.9769	5.38923e-08	37.9769	5.54965e-08
38.0862	5.15495e-08	38.0769	5.3282e-08	38.0769	5.48862e-08
38.1862	5.14884e-08	38.1769	5.35872e-08	38.1769	5.51913e-08
38.2862	5.10001e-08	38.2769	5.27937e-08	38.2769	5.43979e-08
38.3862	5.05424e-08	38.3769	5.29158e-08	38.3769	5.452e-08
38.4862	5.04813e-08	38.4769	5.3221e-08	38.4769	5.48251e-08
38.5862	5.06644e-08	38.5769	5.31599e-08	38.5769	5.47641e-08
38.6862	5.00846e-08	38.6769	5.28242e-08	38.6769	5.44284e-08
38.7862	4.981e-08	38.7769	5.29463e-08	38.7769	5.45505e-08
38.8862	4.95048e-08	38.8769	5.21834e-08	38.8769	5.37875e-08
38.9862	4.9047e-08	38.9769	5.1634e-08	38.9769	5.32382e-08
39.0862	4.83146e-08	39.0769	5.18477e-08	39.0769	5.34518e-08
39.1862	4.79179e-08	39.1769	5.17561e-08	39.1769	5.33603e-08
39.2862	4.86503e-08	39.2769	5.14509e-08	39.2769	5.30551e-08
39.3862	4.78873e-08	39.3769	5.17256e-08	39.3769	5.33298e-08
39.4862	4.8101e-08	39.4769	5.21528e-08	39.4769	5.3757e-08
39.5862	4.88029e-08	39.5769	5.18782e-08	39.5769	5.34824e-08
39.6862	4.87724e-08	39.6769	5.18782e-08	39.6769	5.34824e-08
39.7862	4.86808e-08	39.7769	5.1573e-08	39.7769	5.31772e-08
39.8862	4.86808e-08	39.8769	5.10542e-08	39.8769	5.26584e-08
39.9862	4.88944e-08	39.9769	5.04744e-08	39.9769	5.20786e-08
40.0862	4.87418e-08	40.0769	5.00166e-08	40.0769	5.16208e-08
40.1862	4.79179e-08	40.1769	4.99251e-08	40.1769	5.15292e-08
40.2862	4.8101e-08	40.2769	5.00471e-08	40.2769	5.16513e-08
40.3862	4.84367e-08	40.3769	4.97725e-08	40.3769	5.13766e-08
40.4862	4.81925e-08	40.4769	4.96809e-08	40.4769	5.12851e-08
40.5862	4.82841e-08	40.5769	5.00471e-08	40.5769	5.16513e-08
40.6862	4.82536e-08	40.6769	4.97114e-08	40.6769	5.13156e-08
40.7862	4.79179e-08	40.7769	4.88569e-08	40.7769	5.04611e-08
40.8862	4.79789e-08	40.8769	4.83381e-08	40.8769	4.99423e-08
40.9862	4.75822e-08	40.9769	4.78804e-08	40.9769	4.94846e-08
41.0862	4.80399e-08	41.0769	4.85213e-08	41.0769	5.01254e-08
41.1862	4.77348e-08	41.1769	4.81245e-08	41.1769	4.97287e-08
41.2862	4.78568e-08	41.2769	4.83076e-08	41.2769	4.99118e-08
41.3862	4.75517e-08	41.3769	4.74226e-08	41.3769	4.90268e-08
41.4862	4.73075e-08	41.4769	4.79414e-08	41.4769	4.95456e-08
41.5862	4.78263e-08	41.5769	4.83381e-08	41.5769	4.99423e-08
41.6862	4.73075e-08	41.6769	4.77583e-08	41.6769	4.93625e-08
41.7862	4.7216e-08	41.7769	4.75142e-08	41.7769	4.91183e-08
41.8862	4.75517e-08	41.8769	4.78194e-08	41.8769	4.94235e-08
41.9862	4.67277e-08	41.9769	4.75447e-08	41.9769	4.91489e-08
42.0862	4.68803e-08	42.0769	4.73006e-08	42.0769	4.89047e-08
42.1862	4.65141e-08	42.1769	4.74531e-08	42.1769	4.90573e-08
42.2862	4.6331e-08	42.2769	4.76668e-08	42.2769	4.92709e-08
42.3862	4.58122e-08	42.3769	4.65681e-08	42.3769	4.81723e-08
42.4862	4.57511e-08	42.4769	4.65071e-08	42.4769	4.81113e-08
42.5862	4.54154e-08	42.5769	4.64766e-08	42.5769	4.80807e-08
42.6862	4.59037e-08	42.6769	4.62019e-08	42.6769	4.78061e-08
42.7862	4.50187e-08	42.7769	4.60798e-08	42.7769	4.7684e-08
42.8862	4.4622e-08	42.8769	4.62019e-08	42.8769	4.78061e-08
42.9862	4.49577e-08	42.9769	4.55916e-08	42.9769	4.71957e-08
43.0862	4.45914e-08	43.0769	4.52864e-08	43.0769	4.68906e-08
43.1862	4.48051e-08	43.1769	4.56526e-08	43.1769	4.72568e-08
43.2862	4.41642e-08	43.2769	4.47981e-08	43.2769	4.64023e-08
43.3862	4.44694e-08	43.3769	4.49202e-08	43.3769	4.65244e-08
43.4862	4.44999e-08	43.4769	4.48897e-08	43.4769	4.64938e-08
43.5862	4.39811e-08	43.5769	4.40352e-08	43.5769	4.56393e-08
43.6862	4.43778e-08	43.6769	4.38826e-08	43.6769	4.54868e-08
43.7862	4.43778e-08	43.7769	4.30891e-08	43.7769	4.46933e-08
43.8862	4.45304e-08	43.8769	4.30586e-08	43.8769	4.46628e-08
43.9862	4.41642e-08	43.9769	4.36384e-08	43.9769	4.52426e-08
44.0862	4.38895e-08	44.0769	4.35164e-08	44.0769	4.51205e-08
44.1862	4.49577e-08	44.1769	4.32722e-08	44.1769	4.48764e-08
44.2862	4.52323e-08	44.2769	4.35774e-08	44.2769	4.51816e-08
44.3862	4.48966e-08	44.3769	4.32722e-08	44.3769	4.48764e-08
44.4862	4.4622e-08	44.4769	4.32722e-08	44.4769	4.48764e-08
44.5862	4.45304e-08	44.5769	4.28755e-08	44.5769	4.44797e-08
44.6862	4.41947e-08	44.6769	4.28145e-08	44.6769	4.44186e-08
44.7862	4.39506e-08	44.7769	4.25398e-08	44.7769	4.4144e-08
44.8862	4.40116e-08	44.8769	4.23567e-08	44.8769	4.39609e-08
44.9862	4.35844e-08	44.9769	4.24483e-08	44.9769	4.40524e-08
45.0862	4.40727e-08	45.0769	4.2784e-08	45.0769	4.43881e-08
45.1862	4.34623e-08	45.1769	4.22346e-08	45.1769	4.38388e-08
45.2862	4.37675e-08	45.2769	4.18379e-08	45.2769	4.34421e-08
45.3862	4.33707e-08	45.3769	4.04951e-08	45.3769	4.20993e-08
45.4862	4.28519e-08	45.4769	4.06172e-08	45.4769	4.22214e-08
45.5862	4.23942e-08	45.5769	4.16243e-08	45.5769	4.32285e-08
45.6862	4.26078e-08	45.6769	4.16853e-08	45.6769	4.32895e-08
45.7862	4.30961e-08	45.7769	4.12276e-08	45.7769	4.28317e-08
45.8862	4.31876e-08	45.8769	4.07698e-08	45.8769	4.2374e-08
45.9862	4.17838e-08	45.9769	4.05256e-08	45.9769	4.21298e-08
46.0862	4.07462e-08	46.0769	4.06477e-08	46.0769	4.22519e-08
46.1862	4.04716e-08	46.1769	4.09224e-08	46.1769	4.25265e-08
46.2862	4.04105e-08	46.2769	4.05562e-08	46.2769	4.21603e-08
46.3862	4.04105e-08	46.3769	4.10444e-08	46.3769	4.26486e-08
46.4862	4.0319e-08	46.4769	4.04951e-08	46.4769	4.20993e-08
46.5862	4.07462e-08	46.5769	4.09224e-08	46.5769	4.25265e-08
46.6862	4.01664e-08	46.6769	4.03731e-08	46.6769	4.19772e-08
46.7862	4.00138e-08	46.7769	4.04646e-08	46.7769	4.20688e-08
46.8862	3.97086e-08	46.8769	4.04036e-08	46.8769	4.20077e-08
46.9862	3.94035e-08	46.9769	4.02815e-08	46.9769	4.18857e-08
47.0862	3.93729e-08	47.0769	4.05256e-08	47.0769	4.21298e-08
47.1862	3.9434e-08	47.1769	3.95796e-08	47.1769	4.11838e-08
47.2862	3.91593e-08	47.2769	4.00984e-08	47.2769	4.17026e-08
47.3862	3.90983e-08	47.3769	3.99763e-08	47.3769	4.15805e-08
47.4862	3.96171e-08	47.4769	4.0312e-08	47.4769	4.19162e-08
47.5862	3.94645e-08	47.5769	3.96406e-08	47.5769	4.12448e-08
47.6862	3.9434e-08	47.6769	3.88472e-08	47.6769	4.04514e-08
47.7862	3.90983e-08	47.7769	3.93965e-08	47.7769	4.10007e-08
47.8862	3.89457e-08	47.8769	3.86946e-08	47.8769	4.02988e-08
47.9862	3.88541e-08	47.9769	3.87556e-08	47.9769	4.03598e-08
48.0862	3.81828e-08	48.0769	3.86336e-08	48.0769	4.02377e-08
48.1862	3.76945e-08	48.1769	3.92439e-08	48.1769	4.08481e-08
48.2862	3.83964e-08	48.2769	3.92744e-08	48.2769	4.08786e-08
48.3862	3.87626e-08	48.3769	3.90303e-08	48.3769	4.06345e-08
48.4862	3.83048e-08	48.4769	3.87556e-08	48.4769	4.03598e-08
48.5862	3.93119e-08	48.5769	3.92134e-08	48.5769	4.08176e-08
48.6862	3.81828e-08	48.6769	3.88472e-08	48.6769	4.04514e-08
48.7862	3.82133e-08	48.7769	3.8542e-08	48.7769	4.01462e-08
48.8862	3.83048e-08	48.8769	3.90608e-08	48.8769	4.0665e-08
48.9862	3.79081e-08	48.9769	3.87861e-08	48.9769	4.03903e-08
49.0862	3.80912e-08	49.0769	3.91218e-08	49.0769	4.0726e-08
49.1862	3.78776e-08	49.1769	3.85725e-08	49.1769	4.01767e-08
49.2862	3.78165e-08	49.2769	3.88167e-08	49.2769	4.04208e-08
49.3862	3.80912e-08	49.3769	3.75044e-08	49.3769	3.91086e-08
49.4862	3.7786e-08	49.4769	3.76265e-08	49.4769	3.92306e-08
49.5862	3.75724e-08	49.5769	3.73823e-08	49.5769	3.89865e-08
49.6862	3.73893e-08	49.6769	3.74129e-08	49.6769	3.9017e-08
49.7862	3.70536e-08	49.7769	3.77486e-08	49.7769	3.93527e-08
49.8862	3.69621e-08	49.8769	3.75654e-08	49.8769	3.91696e-08
49.9862	3.67484e-08	49.9769	3.77791e-08	49.9769	3.93832e-08
50.0862	3.71146e-08	50.0769	3.78096e-08	50.0769	3.94138e-08
50.1862	3.68705e-08	50.1769	3.7657e-08	50.1769	3.92612e-08
50.2862	3.71757e-08	50.2769	3.7596e-08	50.2769	3.92001e-08
50.3862	3.61991e-08	50.3769	3.65889e-08	50.3769	3.81931e-08
50.4862	3.6016e-08	50.4769	3.71382e-08	50.4769	3.87424e-08
50.5862	3.65653e-08	50.5769	3.72298e-08	50.5769	3.88339e-08
50.6862	3.58329e-08	50.6769	3.66194e-08	50.6769	3.82236e-08
50.7862	3.507e-08	50.7769	3.63447e-08	50.7769	3.79489e-08
50.8862	3.53446e-08	50.8769	3.65889e-08	50.8769	3.81931e-08
50.9862	3.50394e-08	50.9769	3.65278e-08	50.9769	3.8132e-08
51.0862	3.57414e-08	51.0769	3.6772e-08	51.0769	3.83762e-08
51.1862	3.58024e-08	51.1769	3.64668e-08	51.1769	3.8071e-08
51.2862	3.57108e-08	51.2769	3.59785e-08	51.2769	3.75827e-08
51.3862	3.55277e-08	51.3769	3.56123e-08	51.3769	3.72165e-08
51.4862	3.58939e-08	51.4769	3.56123e-08	51.4769	3.72165e-08
51.5862	3.57108e-08	51.5769	3.5887e-08	51.5769	3.74911e-08
51.6862	3.57108e-08	51.6769	3.57039e-08	51.6769	3.7308e-08
51.7862	3.56498e-08	51.7769	3.53377e-08	51.7769	3.69418e-08
51.8862	3.5192e-08	51.8769	3.5002e-08	51.8769	3.66061e-08
51.9862	3.49174e-08	51.9769	3.44832e-08	51.9769	3.60873e-08
52.0862	3.42765e-08	52.0769	3.50325e-08	52.0769	3.66367e-08
52.1862	3.40934e-08	52.1769	3.44832e-08	52.1769	3.60873e-08
52.2862	3.38493e-08	52.2769	3.5002e-08	52.2769	3.66061e-08
52.3862	3.34525e-08	52.3769	3.50325e-08	52.3769	3.66367e-08
52.4862	3.36051e-08	52.4769	3.50325e-08	52.4769	3.66367e-08
52.5862	3.30863e-08	52.5769	3.46663e-08	52.5769	3.62704e-08
52.6862	3.4185e-08	52.6769	3.47578e-08	52.6769	3.6362e-08
52.7862	3.43681e-08	52.7769	3.48799e-08	52.7769	3.64841e-08
52.8862	3.43375e-08	52.8769	3.44832e-08	52.8769	3.60873e-08
52.9862	3.49174e-08	52.9769	3.46358e-08	52.9769	3.62399e-08
53.0862	3.42155e-08	53.0769	3.48799e-08	53.0769	3.64841e-08
53.1862	3.36662e-08	53.1769	3.47883e-08	53.1769	3.63925e-08
53.2862	3.32389e-08	53.2769	3.37813e-08	53.2769	3.53854e-08
53.3862	3.3422e-08	53.3769	3.39339e-08	53.3769	3.5538e-08
53.4862	3.36051e-08	53.4769	3.47883e-08	53.4769	3.63925e-08
53.5862	3.32084e-08	53.5769	3.42085e-08	53.5769	3.58127e-08
53.6862	3.29032e-08	53.6769	3.4239e-08	53.6769	3.58432e-08
53.7862	3.35136e-08	53.7769	3.42085e-08	53.7769	3.58127e-08
53.8862	3.35136e-08	53.8769	3.42085e-08	53.8769	3.58127e-08
53.9862	3.29643e-08	53.9769	3.38118e-08	53.9769	3.5416e-08
54.0862	3.32694e-08	54.0769	3.39644e-08	54.0769	3.55685e-08
54.1862	3.38187e-08	54.1769	3.37202e-08	54.1769	3.53244e-08
54.2862	3.37882e-08	54.2769	3.34761e-08	54.2769	3.50803e-08
54.3862	3.36967e-08	54.3769	3.36592e-08	54.3769	3.52634e-08
54.4862	3.32999e-08	54.4769	3.40254e-08	54.4769	3.56296e-08
54.5862	3.32084e-08	54.5769	3.35982e-08	54.5769	3.52023e-08
54.6862	3.31168e-08	54.6769	3.3293e-08	54.6769	3.48972e-08
54.7862	3.33915e-08	54.7769	3.28047e-08	54.7769	3.44089e-08
54.8862	3.3361e-08	54.8769	3.30183e-08	54.8769	3.46225e-08
54.9862	3.35441e-08	54.9769	3.28963e-08	54.9769	3.45004e-08
55.0862	3.30558e-08	55.0769	3.253e-08	55.0769	3.41342e-08
55.1862	3.18961e-08	55.1769	3.35066e-08	55.1769	3.51108e-08
55.2862	3.18351e-08	55.2769	3.29573e-08	55.2769	3.45615e-08
55.3862	3.18351e-08	55.3769	3.27437e-08	55.3769	3.43478e-08
55.4862	3.17435e-08	55.4769	3.23164e-08	55.4769	3.39206e-08
55.5862	3.1591e-08	55.5769	3.16756e-08	55.5769	3.32797e-08
55.6862	3.13468e-08	55.6769	3.16756e-08	55.6769	3.32797e-08
55.7862	3.08891e-08	55.7769	3.22249e-08	55.7769	3.3829e-08
55.8862	3.09806e-08	55.8769	3.19502e-08	55.8769	3.35544e-08
55.9862	3.0706e-08	55.9769	3.1523e-08	55.9769	3.31271e-08
56.0862	3.06449e-08	56.0769	3.15535e-08	56.0769	3.31577e-08
56.1862	3.11027e-08	56.1769	3.1523e-08	56.1769	3.31271e-08
56.2862	3.13773e-08	56.2769	3.0699e-08	56.2769	3.23032e-08
56.3862	3.14079e-08	56.3769	3.01497e-08	56.3769	3.17538e-08
56.4862	3.0767e-08	56.4769	3.01497e-08	56.4769	3.17538e-08
56.5862	3.0767e-08	56.5769	3.03938e-08	56.5769	3.1998e-08
56.6862	3.00651e-08	56.6769	2.9814e-08	56.6769	3.14181e-08
56.7862	2.94547e-08	56.7769	2.94173e-08	56.7769	3.10214e-08
56.8862	2.91496e-08	56.8769	3.01802e-08	56.8769	3.17844e-08
56.9862	2.91496e-08	56.9769	2.98445e-08	56.9769	3.14487e-08
57.0862	2.93021e-08	57.0769	2.94478e-08	57.0769	3.10519e-08
57.1862	2.97904e-08	57.1769	2.97835e-08	57.1769	3.13876e-08
57.2862	3.00956e-08	57.2769	2.9814e-08	57.2769	3.14181e-08
57.3862	3.05839e-08	57.3769	2.96919e-08	57.3769	3.12961e-08
57.4862	2.97904e-08	57.4769	2.92036e-08	57.4769	3.08078e-08
57.5862	2.99735e-08	57.5769	2.97529e-08	57.5769	3.13571e-08
57.6862	2.99735e-08	57.6769	2.99055e-08	57.6769	3.15097e-08
57.7862	2.95768e-08	57.7769	2.9814e-08	57.7769	3.14181e-08
57.8862	2.95158e-08	57.8769	3.01802e-08	57.8769	3.17844e-08
57.9862	2.94547e-08	57.9769	2.94478e-08	57.9769	3.10519e-08
58.0862	2.95463e-08	58.0769	2.87459e-08	58.0769	3.035e-08
58.1862	2.92106e-08	58.1769	2.94478e-08	58.1769	3.10519e-08
58.2862	2.90275e-08	58.2769	2.94783e-08	58.2769	3.10825e-08
58.3862	2.90275e-08	58.3769	2.95698e-08	58.3769	3.1174e-08
58.4862	2.87833e-08	58.4769	2.94783e-08	58.4769	3.10825e-08
58.5862	2.8234e-08	58.5769	2.95393e-08	58.5769	3.11435e-08
58.6862	2.83561e-08	58.6769	3.00581e-08	58.6769	3.16623e-08
58.7862	2.79594e-08	58.7769	2.95698e-08	58.7769	3.1174e-08
58.8862	2.7349e-08	58.8769	2.96309e-08	58.8769	3.1235e-08
58.9862	2.79289e-08	58.9769	2.97224e-08	58.9769	3.13266e-08
59.0862	2.74101e-08	59.0769	2.94478e-08	59.0769	3.10519e-08
59.1862	2.70438e-08	59.1769	2.85322e-08	59.1769	3.01364e-08
59.2862	2.76847e-08	59.2769	2.79829e-08	59.2769	2.95871e-08
59.3862	2.71964e-08	59.3769	2.77693e-08	59.3769	2.93735e-08
59.4862	2.63725e-08	59.4769	2.76777e-08	59.4769	2.92819e-08
59.5862	2.63725e-08	59.5769	2.83797e-08	59.5769	2.99838e-08
59.6862	2.59757e-08	59.6769	2.86238e-08	59.6769	3.0228e-08
59.7862	2.6403e-08	59.7769	2.86238e-08	59.7769	3.0228e-08
59.8862	2.6464e-08	59.8769	2.81965e-08	59.8769	2.98007e-08
59.9862	2.59452e-08	59.9769	2.82881e-08	59.9769	2.98923e-08
60.0862	2.57926e-08	60.0769	2.79524e-08	60.0769	2.95566e-08
60.1862	2.60673e-08	60.1769	2.76472e-08	60.1769	2.92514e-08
60.2862	2.5518e-08	60.2769	2.75862e-08	60.2769	2.91904e-08
60.3862	2.58537e-08	60.3769	2.73115e-08	60.3769	2.89157e-08
60.4862	2.56095e-08	60.4769	2.74946e-08	60.4769	2.90988e-08
60.5862	2.60673e-08	60.5769	2.71284e-08	60.5769	2.87326e-08
60.6862	2.60673e-08	60.6769	2.70979e-08	60.6769	2.87021e-08
60.7862	2.52738e-08	60.7769	2.68538e-08	60.7769	2.84579e-08
60.8862	2.58231e-08	60.8769	2.68538e-08	60.8769	2.84579e-08
60.9862	2.5579e-08	60.9769	2.74031e-08	60.9769	2.90073e-08
61.0862	2.59452e-08	61.0769	2.69453e-08	61.0769	2.85495e-08
61.1862	2.57011e-08	61.1769	2.65181e-08	61.1769	2.81223e-08
61.2862	2.53959e-08	61.2769	2.61824e-08	61.2769	2.77866e-08
61.3862	2.48161e-08	61.3769	2.68233e-08	61.3769	2.84274e-08
61.4862	2.50602e-08	61.4769	2.70674e-08	61.4769	2.86716e-08
61.5862	2.50602e-08	61.5769	2.71284e-08	61.5769	2.87326e-08
61.6862	2.50907e-08	61.6769	2.67012e-08	61.6769	2.83054e-08
61.7862	2.48466e-08	61.7769	2.66707e-08	61.7769	2.82748e-08
61.8862	2.49381e-08	61.8769	2.65181e-08	61.8769	2.81223e-08
61.9862	2.3931e-08	61.9769	2.66096e-08	61.9769	2.82138e-08
62.0862	2.39616e-08	62.0769	2.60908e-08	62.0769	2.7695e-08
62.1862	2.37785e-08	62.1769	2.63045e-08	62.1769	2.79086e-08
62.2862	2.42057e-08	62.2769	2.59077e-08	62.2769	2.75119e-08
62.3862	2.40836e-08	62.3769	2.50227e-08	62.3769	2.66269e-08
62.4862	2.37479e-08	62.4769	2.52974e-08	62.4769	2.69015e-08
62.5862	2.39616e-08	62.5769	2.49617e-08	62.5769	2.65659e-08
62.6862	2.41752e-08	62.6769	2.54194e-08	62.6769	2.70236e-08
62.7862	2.42057e-08	62.7769	2.53889e-08	62.7769	2.69931e-08
62.8862	2.39616e-08	62.8769	2.50838e-08	62.8769	2.66879e-08
62.9862	2.3809e-08	62.9769	2.54805e-08	62.9769	2.70847e-08
63.0862	2.39005e-08	63.0769	2.49922e-08	63.0769	2.65964e-08
63.1862	2.35038e-08	63.1769	2.4626e-08	63.1769	2.62302e-08
63.2862	2.35343e-08	63.2769	2.50227e-08	63.2769	2.66269e-08
63.3862	2.37785e-08	63.3769	2.48091e-08	63.3769	2.64133e-08
63.4862	2.35954e-08	63.4769	2.41682e-08	63.4769	2.57724e-08
63.5862	2.45719e-08	63.5769	2.39851e-08	63.5769	2.55893e-08
63.6862	2.3931e-08	63.6769	2.49006e-08	63.6769	2.65048e-08
63.7862	2.42057e-08	63.7769	2.41682e-08	63.7769	2.57724e-08
63.8862	2.41752e-08	63.8769	2.4626e-08	63.8769	2.62302e-08
63.9862	2.39616e-08	63.9769	2.4565e-08	63.9769	2.61691e-08
64.0862	2.28935e-08	64.0769	2.45344e-08	64.0769	2.61386e-08
64.1862	2.32597e-08	64.1769	2.45344e-08	64.1769	2.61386e-08
64.2862	2.28324e-08	64.2769	2.44429e-08	64.2769	2.60471e-08
64.3862	2.2924e-08	64.3769	2.42293e-08	64.3769	2.58334e-08
64.4862	2.24967e-08	64.4769	2.39851e-08	64.4769	2.55893e-08
64.5862	2.32597e-08	64.5769	2.41377e-08	64.5769	2.57419e-08
64.6862	2.31376e-08	64.6769	2.34968e-08	64.6769	2.5101e-08
64.7862	2.23747e-08	64.7769	2.34968e-08	64.7769	2.5101e-08
64.8862	2.26493e-08	64.8769	2.36799e-08	64.8769	2.52841e-08
64.9862	2.28629e-08	64.9769	2.35274e-08	64.9769	2.51315e-08
65.0862	2.28019e-08	65.0769	2.33137e-08	65.0769	2.49179e-08
65.1862	2.21e-08	65.1769	2.32527e-08	65.1769	2.48569e-08
65.2862	2.23441e-08	65.2769	2.2978e-08	65.2769	2.45822e-08
65.3862	2.28629e-08	65.3769	2.28255e-08	65.3769	2.44296e-08
65.4862	2.25578e-08	65.4769	2.31917e-08	65.4769	2.47958e-08
65.5862	2.16422e-08	65.5769	2.30086e-08	65.5769	2.46127e-08
65.6862	2.13981e-08	65.6769	2.31611e-08	65.6769	2.47653e-08
65.7862	2.20695e-08	65.7769	2.2978e-08	65.7769	2.45822e-08
65.8862	2.22526e-08	65.8769	2.25508e-08	65.8769	2.4155e-08
65.9862	2.17948e-08	65.9769	2.21846e-08	65.9769	2.37888e-08
66.0862	2.12455e-08	66.0769	2.21846e-08	66.0769	2.37888e-08
66.1862	2.14591e-08	66.1769	2.26118e-08	66.1769	2.4216e-08
66.2862	2.13065e-08	66.2769	2.2032e-08	66.2769	2.36362e-08
66.3862	2.11539e-08	66.3769	2.21236e-08	66.3769	2.37277e-08
66.4862	2.10929e-08	66.4769	2.19099e-08	66.4769	2.35141e-08
66.5862	2.02384e-08	66.5769	2.25508e-08	66.5769	2.4155e-08
66.6862	2.02384e-08	66.6769	2.26729e-08	66.6769	2.4277e-08
66.7862	1.98112e-08	66.7769	2.24287e-08	66.7769	2.40329e-08
66.8862	2.02384e-08	66.8769	2.26423e-08	66.8769	2.42465e-08
66.9862	1.98417e-08	66.9769	2.28865e-08	66.9769	2.44907e-08
67.0862	1.96891e-08	67.0769	2.33443e-08	67.0769	2.49484e-08
67.1862	1.91398e-08	67.1769	2.23067e-08	67.1769	2.39108e-08
67.2862	1.96891e-08	67.2769	2.14216e-08	67.2769	2.30258e-08
67.3862	1.94755e-08	67.3769	2.17268e-08	67.3769	2.3331e-08
67.4862	1.95365e-08	67.4769	2.1208e-08	67.4769	2.28122e-08
67.5862	1.91703e-08	67.5769	2.17268e-08	67.5769	2.3331e-08
67.6862	1.85905e-08	67.6769	2.19404e-08	67.6769	2.35446e-08
67.7862	1.84379e-08	67.7769	2.08113e-08	67.7769	2.24155e-08
67.8862	1.88041e-08	67.8769	2.06892e-08	67.8769	2.22934e-08
67.9862	1.88346e-08	67.9769	2.09334e-08	67.9769	2.25375e-08
68.0862	1.85294e-08	68.0769	2.0384e-08	68.0769	2.19882e-08
68.1862	1.85905e-08	68.1769	2.04756e-08	68.1769	2.20798e-08
68.2862	1.81327e-08	68.2769	2.0262e-08	68.2769	2.18661e-08
68.3862	1.7797e-08	68.3769	2.05061e-08	68.3769	2.21103e-08
68.4862	1.82853e-08	68.4769	2.0384e-08	68.4769	2.19882e-08
68.5862	1.78886e-08	68.5769	1.98652e-08	68.5769	2.14694e-08
68.6862	1.80717e-08	68.6769	1.95601e-08	68.6769	2.11642e-08
68.7862	1.79801e-08	68.7769	1.99568e-08	68.7769	2.1561e-08
68.8862	1.76749e-08	68.8769	1.99873e-08	68.8769	2.15915e-08
68.9862	1.79191e-08	68.9769	2.0384e-08	68.9769	2.19882e-08
69.0862	1.85294e-08	69.0769	2.08113e-08	69.0769	2.24155e-08
69.1862	1.89262e-08	69.1769	2.06892e-08	69.1769	2.22934e-08
69.2862	1.88041e-08	69.2769	2.01094e-08	69.2769	2.17136e-08
69.3862	1.85294e-08	69.3769	1.98042e-08	69.3769	2.14084e-08
69.4862	1.84379e-08	69.4769	1.90718e-08	69.4769	2.0676e-08
69.5862	1.81327e-08	69.5769	1.91328e-08	69.5769	2.0737e-08
69.6862	1.81632e-08	69.6769	1.95906e-08	69.6769	2.11948e-08
69.7862	1.79801e-08	69.7769	1.95601e-08	69.7769	2.11642e-08
69.8862	1.75529e-08	69.8769	1.93159e-08	69.8769	2.09201e-08
69.9862	1.72477e-08	69.9769	1.92854e-08	69.9769	2.08896e-08
70.0862	1.79191e-08	70.0769	1.95601e-08	70.0769	2.11642e-08
70.1862	1.7797e-08	70.1769	1.9377e-08	70.1769	2.09811e-08
70.2862	1.76749e-08	70.2769	1.86445e-08	70.2769	2.02487e-08
70.3862	1.74003e-08	70.3769	1.91023e-08	70.3769	2.07065e-08
70.4862	1.71561e-08	70.4769	1.87056e-08	70.4769	2.03098e-08
70.5862	1.70646e-08	70.5769	1.83089e-08	70.5769	1.9913e-08
70.6862	1.70951e-08	70.6769	1.84309e-08	70.6769	2.00351e-08
70.7862	1.73393e-08	70.7769	1.84004e-08	70.7769	2.00046e-08
70.8862	1.71867e-08	70.8769	1.78816e-08	70.8769	1.94858e-08
70.9862	1.73087e-08	70.9769	1.75154e-08	70.9769	1.91196e-08
71.0862	1.70036e-08	71.0769	1.72713e-08	71.0769	1.88754e-08
71.1862	1.72172e-08	71.1769	1.73628e-08	71.1769	1.8967e-08
71.2862	1.65458e-08	71.2769	1.73933e-08	71.2769	1.89975e-08
71.3862	1.59049e-08	71.3769	1.70271e-08	71.3769	1.86313e-08
71.4862	1.55692e-08	71.4769	1.6844e-08	71.4769	1.84482e-08
71.5862	1.58134e-08	71.5769	1.65388e-08	71.5769	1.8143e-08
71.6862	1.57523e-08	71.6769	1.71187e-08	71.6769	1.87228e-08
71.7862	1.55692e-08	71.7769	1.64778e-08	71.7769	1.8082e-08
71.8862	1.5203e-08	71.8769	1.70881e-08	71.8769	1.86923e-08
71.9862	1.51725e-08	71.9769	1.71797e-08	71.9769	1.87839e-08
72.0862	1.54777e-08	72.0769	1.69966e-08	72.0769	1.86008e-08
72.1862	1.54777e-08	72.1769	1.64778e-08	72.1769	1.8082e-08
72.2862	1.55387e-08	72.2769	1.55318e-08	72.2769	1.71359e-08
72.3862	1.51725e-08	72.3769	1.45857e-08	72.3769	1.61899e-08
72.4862	1.53556e-08	72.4769	1.5135e-08	72.4769	1.67392e-08
72.5862	1.55998e-08	72.5769	1.55623e-08	72.5769	1.71664e-08
72.6862	1.46537e-08	72.6769	1.47688e-08	72.6769	1.6373e-08
72.7862	1.41044e-08	72.7769	1.48604e-08	72.7769	1.64645e-08
72.8862	1.37382e-08	72.8769	1.49519e-08	72.8769	1.65561e-08
72.9862	1.30668e-08	72.9769	1.46773e-08	72.9769	1.62814e-08
73.0862	1.40434e-08	73.0769	1.48604e-08	73.0769	1.64645e-08
73.1862	1.46232e-08	73.1769	1.48604e-08	73.1769	1.64645e-08
73.2862	1.44706e-08	73.2769	1.45552e-08	73.2769	1.61594e-08
73.3862	1.49589e-08	73.3769	1.47078e-08	73.3769	1.63119e-08
73.4862	1.48063e-08	73.4769	1.41585e-08	73.4769	1.57626e-08
73.5862	1.44401e-08	73.5769	1.37007e-08	73.5769	1.53049e-08
73.6862	1.46842e-08	73.6769	1.37007e-08	73.6769	1.53049e-08
73.7862	1.49894e-08	73.7769	1.37007e-08	73.7769	1.53049e-08
73.8862	1.45011e-08	73.8769	1.37617e-08	73.8769	1.53659e-08
73.9862	1.31278e-08	73.9769	1.36091e-08	73.9769	1.52133e-08
74.0862	1.35551e-08	74.0769	1.37923e-08	74.0769	1.53964e-08
74.1862	1.34025e-08	74.1769	1.40059e-08	74.1769	1.561e-08
74.2862	1.31889e-08	74.2769	1.38838e-08	74.2769	1.5488e-08
74.3862	1.28837e-08	74.3769	1.43721e-08	74.3769	1.59763e-08
74.4862	1.33109e-08	74.4769	1.39143e-08	74.4769	1.55185e-08
74.5862	1.29447e-08	74.5769	1.49214e-08	74.5769	1.65256e-08
74.6862	1.32804e-08	74.6769	1.41585e-08	74.6769	1.57626e-08
74.7862	1.32499e-08	74.7769	1.44942e-08	74.7769	1.60983e-08
74.8862	1.2548e-08	74.8769	1.47993e-08	74.8769	1.64035e-08
74.9862	1.29142e-08	74.9769	1.39143e-08	74.9769	1.55185e-08
75.0862	1.24259e-08	75.0769	1.40669e-08	75.0769	1.56711e-08
75.1862	1.23344e-08	75.1769	1.48604e-08	75.1769	1.64645e-08
75.2862	1.24564e-08	75.2769	1.36397e-08	75.2769	1.52438e-08
75.3862	1.18156e-08	75.3769	1.26631e-08	75.3769	1.42673e-08
75.4862	1.23344e-08	75.4769	1.26326e-08	75.4769	1.42368e-08
75.5862	1.14799e-08	75.5769	1.47383e-08	75.5769	1.63425e-08
75.6862	1.15714e-08	75.6769	1.34871e-08	75.6769	1.50912e-08
75.7862	1.15409e-08	75.7769	1.32735e-08	75.7769	1.48776e-08
75.8862	1.16325e-08	75.8769	1.27852e-08	75.8769	1.43893e-08
75.9862	1.18461e-08	75.9769	1.27852e-08	75.9769	1.43893e-08
76.0862	1.17545e-08	76.0769	1.29683e-08	76.0769	1.45724e-08
76.1862	1.22733e-08	76.1769	1.22664e-08	76.1769	1.38705e-08
76.2862	1.20902e-08	76.2769	1.26631e-08	76.2769	1.42673e-08
76.3862	1.26701e-08	76.3769	1.30598e-08	76.3769	1.4664e-08
76.4862	1.25175e-08	76.4769	1.31514e-08	76.4769	1.47556e-08
76.5862	1.35551e-08	76.5769	1.30598e-08	76.5769	1.4664e-08
76.6862	1.33414e-08	76.6769	1.29683e-08	76.6769	1.45724e-08
76.7862	1.38908e-08	76.7769	1.2541e-08	76.7769	1.41452e-08
76.8862	1.39518e-08	76.8769	1.26326e-08	76.8769	1.42368e-08
76.9862	1.3433e-08	76.9769	1.21443e-08	76.9769	1.37485e-08
77.0862	1.35551e-08	77.0769	1.21138e-08	77.0769	1.3718e-08
77.1862	1.37077e-08	77.1769	1.21138e-08	77.1769	1.3718e-08
77.2862	1.41654e-08	77.2769	1.16255e-08	77.2769	1.32297e-08
77.3862	1.38908e-08	77.3769	1.19917e-08	77.3769	1.35959e-08
77.4862	1.37992e-08	77.4769	1.22359e-08	77.4769	1.384e-08
77.5862	1.28227e-08	77.5769	1.21748e-08	77.5769	1.3779e-08
77.6862	1.28532e-08	77.6769	1.16865e-08	77.6769	1.32907e-08
77.7862	1.28227e-08	77.7769	1.11067e-08	77.7769	1.27109e-08
77.8862	1.36161e-08	77.8769	1.11372e-08	77.8769	1.27414e-08
77.9862	1.30973e-08	77.9769	1.09846e-08	77.9769	1.25888e-08
78.0862	1.26395e-08	78.0769	1.11067e-08	78.0769	1.27109e-08
78.1862	1.28227e-08	78.1769	1.12593e-08	78.1769	1.28635e-08
78.2862	1.30363e-08	78.2769	1.12288e-08	78.2769	1.28329e-08
78.3862	1.30058e-08	78.3769	1.09541e-08	78.3769	1.25583e-08
78.4862	1.3372e-08	78.4769	1.16865e-08	78.4769	1.32907e-08
78.5862	1.37687e-08	78.5769	1.17171e-08	78.5769	1.33212e-08
78.6862	1.37077e-08	78.6769	1.0771e-08	78.6769	1.23752e-08
78.7862	1.30973e-08	78.7769	1.08015e-08	78.7769	1.24057e-08
78.8862	1.34635e-08	78.8769	1.071e-08	78.8769	1.23141e-08
78.9862	1.34025e-08	78.9769	9.91652e-09	78.9769	1.15207e-08
79.0862	1.28227e-08	79.0769	1.02217e-08	79.0769	1.18259e-08
79.1862	1.32194e-08	79.1769	9.7029e-09	79.1769	1.13071e-08
79.2862	1.25175e-08	79.2769	1.04353e-08	79.2769	1.20395e-08
79.3862	1.27311e-08	79.3769	1.00386e-08	79.3769	1.16428e-08
79.4862	1.28227e-08	79.4769	1.04658e-08	79.4769	1.207e-08
79.5862	1.23039e-08	79.5769	1.00386e-08	79.5769	1.16428e-08
79.6862	1.23954e-08	79.6769	1.00081e-08	79.6769	1.16122e-08
79.7862	1.20597e-08	79.7769	9.97755e-09	79.7769	1.15817e-08
79.8862	1.26701e-08	79.8769	9.82497e-09	79.8769	1.14291e-08
79.9862	1.27006e-08	79.9769	9.79445e-09	79.9769	1.13986e-08
80.0862	1.21207e-08	80.0769	9.61134e-09	80.0769	1.12155e-08
80.1862	1.19682e-08	80.1769	9.3672e-09	80.1769	1.09714e-08
80.2862	1.12052e-08	80.2769	9.24513e-09	80.2769	1.08493e-08
80.3862	1.09e-08	80.3769	9.45876e-09	80.3769	1.10629e-08
80.4862	1.10526e-08	80.4769	9.27565e-09	80.4769	1.08798e-08
80.5862	1.14188e-08	80.5769	8.6653e-09	80.5769	1.02695e-08
80.6862	1.12052e-08	80.6769	8.51271e-09	80.6769	1.01169e-08
80.7862	1.06559e-08	80.7769	8.90944e-09	80.7769	1.05136e-08
80.8862	1.01066e-08	80.8769	8.87892e-09	80.8769	1.04831e-08
80.9862	1.05338e-08	80.9769	9.3672e-09	80.9769	1.09714e-08
81.0862	9.77089e-09	81.0769	8.97047e-09	81.0769	1.05746e-08
81.1862	9.28261e-09	81.1769	9.09254e-09	81.1769	1.06967e-08
81.2862	9.52675e-09	81.2769	9.1841e-09	81.2769	1.07883e-08
81.3862	9.46572e-09	81.3769	8.8484e-09	81.3769	1.04526e-08
81.4862	9.4352e-09	81.4769	8.17702e-09	81.4769	9.78119e-09
81.5862	9.64882e-09	81.5769	8.26857e-09	81.5769	9.87274e-09
81.6862	9.46572e-09	81.6769	8.26857e-09	81.6769	9.87274e-09
81.7862	9.09951e-09	81.7769	7.53615e-09	81.7769	9.14032e-09
81.8862	9.22158e-09	81.8769	8.05495e-09	81.8769	9.65912e-09
81.9862	8.76381e-09	81.9769	8.20753e-09	81.9769	9.8117e-09
82.0862	8.82485e-09	82.0769	8.36012e-09	82.0769	9.96429e-09
82.1862	9.13002e-09	82.1769	7.59718e-09	82.1769	9.20135e-09
82.2862	9.06899e-09	82.2769	7.93288e-09	82.2769	9.53705e-09
82.3862	8.18398e-09	82.3769	7.84132e-09	82.3769	9.44549e-09
82.4862	8.51967e-09	82.4769	7.35304e-09	82.4769	8.95721e-09
82.5862	8.48915e-09	82.5769	7.71925e-09	82.5769	9.32342e-09
82.6862	8.55019e-09	82.6769	7.78029e-09	82.6769	9.38446e-09
82.7862	8.2145e-09	82.7769	7.74977e-09	82.7769	9.35394e-09
82.8862	8.61122e-09	82.8769	6.95631e-09	82.8769	8.56048e-09
82.9862	8.48915e-09	82.9769	7.50563e-09	82.9769	9.1098e-09
83.0862	8.79433e-09	83.0769	7.29201e-09	83.0769	8.89618e-09
83.1862	8.33657e-09	83.1769	7.50563e-09	83.1769	9.1098e-09
83.2862	8.51967e-09	83.2769	7.41408e-09	83.2769	9.01825e-09
83.3862	8.67226e-09	83.3769	7.04787e-09	83.3769	8.65204e-09
83.4862	8.9164e-09	83.4769	6.89528e-09	83.4769	8.49945e-09
83.5862	8.36708e-09	83.5769	6.74269e-09	83.5769	8.34686e-09
83.6862	8.24501e-09	83.6769	6.34596e-09	83.6769	7.95013e-09
83.7862	7.93984e-09	83.7769	7.04787e-09	83.7769	8.65204e-09
83.8862	7.97036e-09	83.8769	6.28493e-09	83.8769	7.8891e-09
83.9862	7.39052e-09	83.9769	7.29201e-09	83.9769	8.89618e-09
84.0862	7.6957e-09	84.0769	6.65114e-09	84.0769	8.25531e-09
84.1862	7.78725e-09	84.1769	6.83424e-09	84.1769	8.43841e-09
84.2862	7.29897e-09	84.2769	6.19337e-09	84.2769	7.79754e-09
84.3862	8.15346e-09	84.3769	6.43752e-09	84.3769	8.04169e-09
84.4862	8.42812e-09	84.4769	6.89528e-09	84.4769	8.49945e-09
84.5862	8.03139e-09	84.5769	6.80373e-09	84.5769	8.4079e-09
84.6862	7.54311e-09	84.6769	6.62062e-09	84.6769	8.22479e-09
84.7862	7.36e-09	84.7769	5.94923e-09	84.7769	7.5534e-09
84.8862	7.54311e-09	84.8769	7.4446e-09	84.8769	9.04877e-09
84.9862	7.63466e-09	84.9769	7.13942e-09	84.9769	8.74359e-09
85.0862	7.20742e-09	85.0769	6.10182e-09	85.0769	7.70599e-09
85.1862	7.51259e-09	85.1769	6.37648e-09	85.1769	7.98065e-09
85.2862	7.08535e-09	85.2769	6.19337e-09	85.2769	7.79754e-09
85.3862	6.62758e-09	85.3769	5.94923e-09	85.3769	7.5534e-09
85.4862	7.14638e-09	85.4769	6.10182e-09	85.4769	7.70599e-09
85.5862	7.14638e-09	85.5769	6.0713e-09	85.5769	7.67547e-09
85.6862	6.93276e-09	85.6769	5.91872e-09	85.6769	7.52289e-09
85.7862	7.23793e-09	85.7769	6.49855e-09	85.7769	8.10272e-09
85.8862	7.81777e-09	85.8769	5.76613e-09	85.8769	7.3703e-09
85.9862	7.08535e-09	85.9769	6.43752e-09	85.9769	8.04169e-09
86.0862	7.1769e-09	86.0769	6.37648e-09	86.0769	7.98065e-09
86.1862	7.57363e-09	86.1769	6.22389e-09	86.1769	7.82806e-09
86.2862	7.42104e-09	86.2769	5.55251e-09	86.2769	7.15668e-09
86.3862	7.11586e-09	86.3769	5.61354e-09	86.3769	7.21771e-09
86.4862	7.42104e-09	86.4769	5.30836e-09	86.4769	6.91253e-09
86.5862	8.00087e-09	86.5769	5.09474e-09	86.5769	6.69891e-09
86.6862	7.75673e-09	86.6769	4.63698e-09	86.6769	6.24115e-09
86.7862	7.11586e-09	86.7769	4.60646e-09	86.7769	6.21063e-09
86.8862	7.23793e-09	86.8769	4.72853e-09	86.8769	6.3327e-09
86.9862	7.36e-09	86.9769	4.27077e-09	86.9769	5.87494e-09
87.0862	6.53603e-09	87.0769	4.3318e-09	87.0769	5.93597e-09
87.1862	6.81069e-09	87.1769	4.72853e-09	87.1769	6.3327e-09
87.2862	6.90224e-09	87.2769	3.6299e-09	87.2769	5.23407e-09
87.3862	6.62758e-09	87.3769	3.99611e-09	87.3769	5.60028e-09
87.4862	6.68862e-09	87.4769	3.87404e-09	87.4769	5.47821e-09
87.5862	6.74965e-09	87.5769	4.3318e-09	87.5769	5.93597e-09
87.6862	6.32241e-09	87.6769	4.05714e-09	87.6769	5.66131e-09
87.7862	6.47499e-09	87.7769	4.48439e-09	87.7769	6.08856e-09
87.8862	5.83413e-09	87.8769	4.45387e-09	87.8769	6.05804e-09
87.9862	5.46791e-09	87.9769	4.6675e-09	87.9769	6.27167e-09
88.0862	5.37636e-09	88.0769	4.42336e-09	88.0769	6.02752e-09
88.1862	5.37636e-09	88.1769	4.27077e-09	88.1769	5.87494e-09
88.2862	4.61342e-09	88.2769	4.75905e-09	88.2769	6.36322e-09
88.3862	4.94912e-09	88.3769	4.63698e-09	88.3769	6.24115e-09
88.4862	4.76601e-09	88.4769	4.39284e-09	88.4769	5.99701e-09
88.5862	5.01015e-09	88.5769	4.36232e-09	88.5769	5.96649e-09
88.6862	5.46791e-09	88.6769	5.15578e-09	88.6769	6.75995e-09
88.7862	5.49843e-09	88.7769	4.63698e-09	88.7769	6.24115e-09
88.8862	5.31533e-09	88.8769	4.08766e-09	88.8769	5.69183e-09
88.9862	5.37636e-09	88.9769	3.59938e-09	88.9769	5.20355e-09
89.0862	5.46791e-09	89.0769	4.02663e-09	89.0769	5.6308e-09
89.1862	5.31533e-09	89.1769	3.84352e-09	89.1769	5.44769e-09
89.2862	4.82705e-09	89.2769	3.66042e-09	89.2769	5.26459e-09
89.3862	4.61342e-09	89.3769	3.78249e-09	89.3769	5.38666e-09
89.4862	4.21669e-09	89.4769	3.2942e-09	89.4769	4.89837e-09
89.5862	3.81997e-09	89.5769	3.47731e-09	89.5769	5.08148e-09
89.6862	3.60634e-09	89.6769	3.32472e-09	89.6769	4.92889e-09
89.7862	3.51479e-09	89.7769	2.83644e-09	89.7769	4.44061e-09
89.8862	3.57582e-09	89.8769	2.89748e-09	89.8769	4.50165e-09
89.9862	3.42324e-09	89.9769	2.62282e-09	89.9769	4.22699e-09
90.0862	3.60634e-09	90.0769	2.68385e-09	90.0769	4.28802e-09
90.1862	3.27065e-09	90.1769	2.74489e-09	90.1769	4.34906e-09
90.2862	2.6603e-09	90.2769	2.43971e-09	90.2769	4.04388e-09
90.3862	2.29409e-09	90.3769	2.43971e-09	90.3769	4.04388e-09
90.4862	1.95839e-09	90.4769	2.65334e-09	90.4769	4.25751e-09
90.5862	2.50771e-09	90.5769	2.83644e-09	90.5769	4.44061e-09
90.6862	2.29409e-09	90.6769	2.53127e-09	90.6769	4.13544e-09
90.7862	1.95839e-09	90.7769	2.04298e-09	90.7769	3.64715e-09
90.8862	2.01943e-09	90.8769	2.10402e-09	90.8769	3.70819e-09
90.9862	1.68373e-09	90.9769	1.82936e-09	90.9769	3.43353e-09
91.0862	1.71425e-09	91.0769	2.47023e-09	91.0769	4.0744e-09
91.1862	1.40908e-09	91.1769	1.8904e-09	91.1769	3.49457e-09
91.2862	1.40908e-09	91.2769	1.82936e-09	91.2769	3.43353e-09
91.3862	1.19545e-09	91.3769	1.67677e-09	91.3769	3.28094e-09
91.4862	1.37856e-09	91.4769	2.0735e-09	91.4769	3.67767e-09
91.5862	1.86684e-09	91.5769	2.62282e-09	91.5769	4.22699e-09
91.6862	2.1415e-09	91.6769	2.19557e-09	91.6769	3.79974e-09
91.7862	2.35512e-09	91.7769	1.79884e-09	91.7769	3.40301e-09
91.8862	2.38564e-09	91.8769	2.25661e-09	91.8769	3.86078e-09
91.9862	2.53823e-09	91.9769	1.98195e-09	91.9769	3.58612e-09
92.0862	2.29409e-09	92.0769	1.85988e-09	92.0769	3.46405e-09
92.1862	1.50063e-09	92.1769	2.80592e-09	92.1769	4.41009e-09
92.2862	1.95839e-09	92.2769	1.64626e-09	92.2769	3.25043e-09
92.3862	1.95839e-09	92.3769	1.8904e-09	92.3769	3.49457e-09
92.4862	2.04995e-09	92.4769	2.25661e-09	92.4769	3.86078e-09
92.5862	2.56874e-09	92.5769	1.92091e-09	92.5769	3.52508e-09
92.6862	1.83632e-09	92.6769	1.40211e-09	92.6769	3.00628e-09
92.7862	1.28701e-09	92.7769	1.46315e-09	92.7769	3.06732e-09
92.8862	7.98725e-10	92.8769	1.43263e-09	92.8769	3.0368e-09
92.9862	1.86684e-09	92.9769	1.18849e-09	92.9769	2.79266e-09
93.0862	1.77529e-09	93.0769	9.13834e-10	93.0769	2.518e-09
93.1862	6.46137e-10	93.1769	1.0359e-09	93.1769	2.64007e-09
93.2862	5.54584e-10	93.2769	8.22281e-10	93.2769	2.42645e-09
93.3862	1.04287e-09	93.3769	2.72964e-10	93.3769	1.87713e-09
93.4862	1.31752e-09	93.4769	2.88238e-11	93.4769	1.63299e-09
93.5862	8.29243e-10	93.5769	1.50894e-10	93.5769	1.75506e-09
93.6862	8.5976e-10	93.6769	3.34e-10	93.6769	1.93817e-09
93.7862	7.3769e-10	93.7769	2.88238e-11	93.7769	1.63299e-09
93.8862	5.85102e-10	93.8769	3.95035e-10	93.8769	1.9992e-09
93.9862	1.04287e-09	93.9769	4.86587e-10	93.9769	2.09076e-09
94.0862	5.24067e-10	94.0769	1.50894e-10	94.0769	1.75506e-09
94.1862	1.88373e-10	94.1769	-4.59457e-10	94.1769	1.14471e-09
94.2862	1.27338e-10	94.2769	-4.89975e-10	94.2769	1.11419e-09
94.3862	5.85102e-10	94.3769	-2.15317e-10	94.3769	1.38885e-09
94.4862	7.3769e-10	94.4769	-3.67905e-10	94.4769	1.23627e-09
94.5862	7.07172e-10	94.5769	-3.67905e-10	94.5769	1.23627e-09
94.6862	1.37856e-09	94.6769	-7.95151e-10	94.6769	8.09019e-10
94.7862	2.49409e-10	94.7769	-5.20493e-10	94.7769	1.08368e-09
94.8862	3.40961e-10	94.8769	-1.84799e-10	94.8769	1.41937e-09
94.9862	4.32514e-10	94.9769	3.95035e-10	94.9769	1.9992e-09
95.0862	3.71479e-10	95.0769	-3.98422e-10	95.0769	1.20575e-09
95.1862	-1.16802e-10	95.1769	-5.20493e-10	95.1769	1.08368e-09
95.2862	-1.1544e-09	95.2769	-9.78256e-10	95.2769	6.25914e-10
95.3862	-7.27154e-10	95.3769	-9.47739e-10	95.3769	6.56431e-10
95.4862	-5.74566e-10	95.4769	-9.78256e-10	95.4769	6.25914e-10
95.5862	-6.35601e-10	95.5769	-9.47739e-10	95.5769	6.56431e-10
95.6862	-4.52496e-10	95.6769	-9.78256e-10	95.6769	6.25914e-10
95.7862	-3.30425e-10	95.7769	-8.25668e-10	95.7769	7.78502e-10
95.8862	-8.79742e-10	95.8769	-7.03598e-10	95.8769	9.00572e-10
95.9862	-6.96636e-10	95.9769	-1.06981e-09	95.9769	5.34361e-10
96.0862	-5.44048e-10	96.0769	-6.42563e-10	96.0769	9.61607e-10
96.1862	-1.06285e-09	96.1769	-1.03929e-09	96.1769	5.64878e-10
96.2862	-1.97837e-09	96.2769	-1.03929e-09	96.2769	5.64878e-10
96.3862	-2.46666e-09	96.3769	-6.12045e-10	96.3769	9.92125e-10
96.4862	-2.03941e-09	96.4769	-6.42563e-10	96.4769	9.61607e-10
96.5862	-9.71295e-10	96.5769	-7.34116e-10	96.5769	8.70054e-10
96.6862	-1.1544e-09	96.6769	-1.49706e-09	96.6769	1.07115e-10
96.7862	-9.40777e-10	96.7769	-1.46654e-09	96.7769	1.37632e-10
96.8862	-1.1544e-09	96.8769	-1.43602e-09	96.8769	1.6815e-10
96.9862	-1.36802e-09	96.9769	-2.04637e-09	96.9769	-4.42202e-10
97.0862	-1.21544e-09	97.0769	-1.43602e-09	97.0769	1.6815e-10
97.1862	-1.82579e-09	97.1769	-2.19896e-09	97.1769	-5.94789e-10
97.2862	-9.71295e-10	97.2769	-1.68016e-09	97.2769	-7.59907e-11
97.3862	-9.10259e-10	97.3769	-2.41258e-09	97.3769	-8.08413e-10
97.4862	-1.21544e-09	97.4769	-2.29051e-09	97.4769	-6.86342e-10
97.5862	-1.49009e-09	97.5769	-2.22948e-09	97.5769	-6.25307e-10
97.6862	-7.88189e-10	97.6769	-2.16844e-09	97.6769	-5.64272e-10
97.7862	-1.21544e-09	97.7769	-1.58861e-09	97.7769	1.55621e-11
97.8862	-1.49009e-09	97.8769	-2.68724e-09	97.8769	-1.08307e-09
97.9862	-1.79527e-09	97.9769	-2.65672e-09	97.9769	-1.05255e-09
98.0862	-2.192e-09	98.0769	-2.56517e-09	98.0769	-9.61e-10
98.1862	-1.55113e-09	98.1769	-2.80931e-09	98.1769	-1.20514e-09
98.2862	-1.79527e-09	98.2769	-3.145e-09	98.2769	-1.54083e-09
98.3862	-1.6732e-09	98.3769	-2.59569e-09	98.3769	-9.91518e-10
98.4862	-1.6732e-09	98.4769	-2.77879e-09	98.4769	-1.17462e-09
98.5862	-2.31407e-09	98.5769	-2.99242e-09	98.5769	-1.38825e-09
98.6862	-1.64268e-09	98.6769	-2.90086e-09	98.6769	-1.29669e-09
98.7862	-1.91734e-09	98.7769	-2.47362e-09	98.7769	-8.69448e-10
98.8862	-1.73423e-09	98.8769	-2.56517e-09	98.8769	-9.61e-10
98.9862	-2.55821e-09	98.9769	-3.20604e-09	98.9769	-1.60187e-09
99.0862	-2.34459e-09	99.0769	-2.35155e-09	99.0769	-7.47377e-10
99.1862	-2.31407e-09	99.1769	-2.83983e-09	99.1769	-1.23566e-09
99.2862	-2.192e-09	99.2769	-2.87035e-09	99.2769	-1.26618e-09
99.3862	-2.22252e-09	99.3769	-3.87743e-09	99.3769	-2.27326e-09
99.4862	-2.77183e-09	99.4769	-3.02293e-09	99.4769	-1.41876e-09
99.5862	-2.58873e-09	99.5769	-3.05345e-09	99.5769	-1.44928e-09
99.6862	-2.49717e-09	99.6769	-3.11449e-09	99.6769	-1.51032e-09
99.7862	-2.8939e-09	99.7769	-3.17552e-09	99.7769	-1.57135e-09
99.8862	-3.04649e-09	99.8769	-4.06053e-09	99.8769	-2.45636e-09
99.9862	-2.83287e-09	99.9769	-4.06053e-09	99.9769	-2.45636e-09
100.086	-3.19908e-09	100.077	-3.60277e-09	100.077	-1.9986e-09
100.186	-2.8939e-09	100.177	-3.69432e-09	100.177	-2.09015e-09
100.286	-2.95494e-09	100.277	-2.22948e-09	100.277	-6.25307e-10
100.386	-2.31407e-09	100.377	-1.19188e-09	100.377	4.12291e-10
100.486	-2.34459e-09	100.477	-4.2894e-10	100.477	1.17523e-09
100.586	-2.49717e-09	100.577	5.17105e-10	100.577	2.12127e-09
100.686	-2.40562e-09	100.677	7.30728e-10	100.677	2.3349e-09
100.786	-2.86338e-09	100.777	1.21901e-09	100.777	2.82318e-09
100.886	-2.46666e-09	100.877	1.70729e-09	100.877	3.31146e-09
100.986	-3.07701e-09	100.977	1.52419e-09	100.977	3.12836e-09
101.086	-2.86338e-09	101.077	2.80592e-09	101.077	4.41009e-09
101.186	-2.16148e-09	101.177	2.53127e-09	101.177	4.13544e-09
101.286	-2.13096e-09	101.277	3.56886e-09	101.277	5.17303e-09
101.386	-1.91734e-09	101.377	4.48439e-09	101.377	6.08856e-09
101.486	-1.91734e-09	101.477	5.03371e-09	101.477	6.63788e-09
101.586	-2.40562e-09	101.577	5.06422e-09	101.577	6.66839e-09
101.686	-1.73423e-09	101.677	5.33888e-09	101.677	6.94305e-09
101.786	-2.00889e-09	101.777	6.19337e-09	101.777	7.79754e-09
101.886	-1.88682e-09	101.877	6.37648e-09	101.877	7.98065e-09
101.986	-2.46666e-09	101.977	7.16994e-09	101.977	8.77411e-09
102.086	-1.97837e-09	102.077	8.20753e-09	102.077	9.8117e-09
102.186	-1.61216e-09	102.177	8.05495e-09	102.177	9.65912e-09
102.286	-1.79527e-09	102.277	8.63478e-09	102.277	1.0239e-08
102.386	-2.25303e-09	102.377	9.30617e-09	102.377	1.09103e-08
102.486	-2.10044e-09	102.477	9.97755e-09	102.477	1.15817e-08
102.586	-1.76475e-09	102.577	1.04658e-08	102.577	1.207e-08
102.686	-2.10044e-09	102.677	1.08626e-08	102.677	1.24667e-08
102.786	-1.79527e-09	102.777	1.06184e-08	102.777	1.22226e-08
102.886	-1.30699e-09	102.877	1.08931e-08	102.877	1.24973e-08
102.986	-8.49224e-10	102.977	1.1656e-08	102.977	1.32602e-08
103.086	-8.18707e-10	103.077	1.18086e-08	103.077	1.34128e-08
103.186	-1.58165e-09	103.177	1.21443e-08	103.177	1.37485e-08
103.286	-1.88682e-09	103.277	1.28462e-08	103.277	1.44504e-08
103.386	-1.55113e-09	103.377	1.35786e-08	103.377	1.51828e-08
103.486	-1.61216e-09	103.477	1.40059e-08	103.477	1.561e-08
103.586	-1.18492e-09	103.577	1.40059e-08	103.577	1.561e-08
103.686	-9.71295e-10	103.677	1.48909e-08	103.677	1.64951e-08
103.786	-1.58165e-09	103.777	1.56233e-08	103.777	1.72275e-08
103.886	-1.58165e-09	103.877	1.59895e-08	103.877	1.75937e-08
103.986	-9.71295e-10	103.977	1.67525e-08	103.977	1.83566e-08
104.086	-1.18492e-09	104.077	1.65999e-08	104.077	1.8204e-08
104.186	-8.79742e-10	104.177	1.66914e-08	104.177	1.82956e-08
104.286	-1.09336e-09	104.277	1.70881e-08	104.277	1.86923e-08
104.386	-8.79742e-10	104.377	1.79426e-08	104.377	1.95468e-08
104.486	-6.35601e-10	104.477	1.8492e-08	104.477	2.00961e-08
104.586	-2.52496e-11	104.577	1.83089e-08	104.577	1.9913e-08
104.686	-1.4732e-10	104.677	1.86751e-08	104.677	2.02792e-08
104.786	6.63031e-11	104.777	1.9377e-08	104.777	2.09811e-08
104.886	7.98725e-10	104.877	1.9377e-08	104.877	2.09811e-08
104.986	1.22597e-09	104.977	1.99873e-08	104.977	2.15915e-08
105.086	4.93549e-10	105.077	2.05672e-08	105.077	2.21713e-08
105.186	5.26793e-12	105.177	2.05977e-08	105.177	2.22018e-08
105.286	6.46137e-10	105.277	2.15742e-08	105.277	2.31784e-08
105.386	1.56166e-09	105.377	2.10249e-08	105.377	2.26291e-08
105.486	1.22597e-09	105.477	2.13606e-08	105.477	2.29648e-08
105.586	1.53115e-09	105.577	2.19099e-08	105.577	2.35141e-08
105.686	2.41616e-09	105.677	2.24592e-08	105.677	2.40634e-08
105.786	2.29409e-09	105.777	2.27949e-08	105.777	2.43991e-08
105.886	2.17202e-09	105.877	2.27644e-08	105.877	2.43686e-08
105.986	2.75185e-09	105.977	2.36799e-08	105.977	2.52841e-08
106.086	2.53823e-09	106.077	2.36494e-08	106.077	2.52536e-08
106.186	2.72133e-09	106.177	2.40462e-08	106.177	2.56503e-08
106.286	3.14858e-09	106.277	2.38631e-08	106.277	2.54672e-08
106.386	3.91152e-09	106.377	2.47175e-08	106.377	2.63217e-08
106.486	4.03359e-09	106.477	2.51143e-08	106.477	2.67184e-08
106.586	3.60634e-09	106.577	2.53889e-08	106.577	2.69931e-08
106.686	3.42324e-09	106.677	2.5572e-08	106.677	2.71762e-08
106.786	4.52187e-09	106.777	2.62739e-08	106.777	2.78781e-08
106.886	4.70497e-09	106.877	2.7159e-08	106.877	2.87631e-08
106.986	5.49843e-09	106.977	2.66096e-08	106.977	2.82138e-08
107.086	5.49843e-09	107.077	2.69148e-08	107.077	2.8519e-08
107.186	5.19326e-09	107.177	2.70369e-08	107.177	2.86411e-08
107.286	5.22377e-09	107.277	2.76777e-08	107.277	2.92819e-08
107.386	5.6205e-09	107.377	2.76167e-08	107.377	2.92209e-08
107.486	6.41396e-09	107.477	2.83186e-08	107.477	2.99228e-08
107.586	6.71914e-09	107.577	2.80134e-08	107.577	2.96176e-08
107.686	7.60414e-09	107.677	2.74336e-08	107.677	2.90378e-08
107.786	6.53603e-09	107.777	2.74946e-08	107.777	2.90988e-08
107.886	7.23793e-09	107.877	2.74336e-08	107.877	2.90378e-08
107.986	6.71914e-09	107.977	2.78303e-08	107.977	2.94345e-08
108.086	7.57363e-09	108.077	2.76777e-08	108.077	2.92819e-08
108.186	6.96328e-09	108.177	2.76472e-08	108.177	2.92514e-08
108.286	7.66518e-09	108.277	2.78609e-08	108.277	2.9465e-08
108.386	8.2145e-09	108.377	2.82576e-08	108.377	2.98618e-08
108.486	8.18398e-09	108.477	2.8166e-08	108.477	2.97702e-08
108.586	8.67226e-09	108.577	2.85628e-08	108.577	3.01669e-08
108.686	9.83193e-09	108.677	2.88069e-08	108.677	3.04111e-08
108.786	9.80141e-09	108.777	2.94173e-08	108.777	3.10214e-08
108.886	9.77089e-09	108.877	2.9875e-08	108.877	3.14792e-08
108.986	1.0015e-08	108.977	3.00276e-08	108.977	3.16318e-08
109.086	1.04423e-08	109.077	2.99055e-08	109.077	3.15097e-08
109.186	1.10526e-08	109.177	3.09126e-08	109.177	3.25168e-08
109.286	1.07475e-08	109.277	3.14009e-08	109.277	3.30051e-08
109.386	8.82485e-09	109.377	3.08821e-08	109.377	3.24863e-08
109.486	8.7333e-09	109.477	3.05159e-08	109.477	3.21201e-08
109.586	1.05033e-08	109.577	3.07295e-08	109.577	3.23337e-08
109.686	1.07475e-08	109.677	3.08211e-08	109.677	3.24252e-08
109.786	1.11747e-08	109.777	3.14314e-08	109.777	3.30356e-08
109.886	1.09611e-08	109.877	3.13704e-08	109.877	3.29745e-08
109.986	1.15409e-08	109.977	3.1645e-08	109.977	3.32492e-08
110.086	1.18156e-08	110.077	3.21333e-08	110.077	3.37375e-08
110.186	1.19376e-08	110.177	3.22859e-08	110.177	3.38901e-08
110.286	1.19376e-08	110.277	3.2469e-08	110.277	3.40732e-08
110.386	1.18766e-08	110.377	3.28657e-08	110.377	3.44699e-08
110.486	1.10526e-08	110.477	3.16756e-08	110.477	3.32797e-08
110.586	1.05643e-08	110.577	3.02717e-08	110.577	3.18759e-08
110.686	1.04118e-08	110.677	2.93562e-08	110.677	3.09604e-08
110.786	1.01676e-08	110.777	2.84407e-08	110.777	3.00449e-08
110.886	1.0015e-08	110.877	2.85933e-08	110.877	3.01974e-08
110.986	9.40468e-09	110.977	2.75557e-08	110.977	2.91598e-08
111.086	9.40468e-09	111.077	2.66707e-08	111.077	2.82748e-08
111.186	9.55727e-09	111.177	2.59688e-08	111.177	2.75729e-08
111.286	9.40468e-09	111.277	2.50227e-08	111.277	2.66269e-08
111.386	9.22158e-09	111.377	2.51448e-08	111.377	2.6749e-08
111.486	8.79433e-09	111.477	2.50838e-08	111.477	2.66879e-08
111.586	8.9164e-09	111.577	2.41987e-08	111.577	2.58029e-08
111.686	8.06191e-09	111.677	2.41682e-08	111.677	2.57724e-08
111.786	8.30605e-09	111.777	2.3802e-08	111.777	2.54062e-08
111.886	8.24501e-09	111.877	2.36799e-08	111.877	2.52841e-08
111.986	8.48915e-09	111.977	2.34358e-08	111.977	2.504e-08
112.086	8.55019e-09	112.077	2.33137e-08	112.077	2.49179e-08
112.186	8.27553e-09	112.177	2.31306e-08	112.177	2.47348e-08
112.286	8.42812e-09	112.277	2.21846e-08	112.277	2.37888e-08
112.386	8.18398e-09	112.377	2.24898e-08	112.377	2.40939e-08
112.486	7.60414e-09	112.477	2.18794e-08	112.477	2.34836e-08
112.586	6.35292e-09	112.577	2.12691e-08	112.577	2.28732e-08
112.686	6.90224e-09	112.677	2.11775e-08	112.677	2.27817e-08
112.786	6.10878e-09	112.777	2.07808e-08	112.777	2.23849e-08
112.886	5.55947e-09	112.877	2.07197e-08	112.877	2.23239e-08
112.986	4.94912e-09	112.977	2.12385e-08	112.977	2.28427e-08
113.086	5.77309e-09	113.077	2.14216e-08	113.077	2.30258e-08
113.186	6.74965e-09	113.177	2.09944e-08	113.177	2.25986e-08
113.286	6.50551e-09	113.277	2.05977e-08	113.277	2.22018e-08
113.386	6.87172e-09	113.377	2.05977e-08	113.377	2.22018e-08
113.486	6.84121e-09	113.477	1.99873e-08	113.477	2.15915e-08
113.586	6.10878e-09	113.577	1.95601e-08	113.577	2.11642e-08
113.686	5.9562e-09	113.677	2.00789e-08	113.677	2.1683e-08
113.786	5.68154e-09	113.777	1.93465e-08	113.777	2.09506e-08
113.886	5.28481e-09	113.877	1.91023e-08	113.877	2.07065e-08
113.986	4.85756e-09	113.977	1.87361e-08	113.977	2.03403e-08
114.086	4.24721e-09	114.077	1.83394e-08	114.077	1.99435e-08
114.186	4.9186e-09	114.177	1.84309e-08	114.177	2.00351e-08
114.286	3.881e-09	114.277	1.91939e-08	114.277	2.0798e-08
114.386	3.60634e-09	114.377	1.82173e-08	114.377	1.98215e-08
114.486	3.05703e-09	114.477	1.8614e-08	114.477	2.02182e-08
114.586	3.45375e-09	114.577	1.75764e-08	114.577	1.91806e-08
114.686	4.06411e-09	114.677	1.76985e-08	114.677	1.93027e-08
114.786	3.78945e-09	114.777	1.70881e-08	114.777	1.86923e-08
114.886	3.63686e-09	114.877	1.73628e-08	114.877	1.8967e-08
114.986	3.78945e-09	114.977	1.69966e-08	114.977	1.86008e-08
115.086	3.78945e-09	115.077	1.67525e-08	115.077	1.83566e-08
115.186	3.60634e-09	115.177	1.62337e-08	115.177	1.78378e-08
115.286	2.99599e-09	115.277	1.58674e-08	115.277	1.74716e-08
115.386	3.63686e-09	115.377	1.56843e-08	115.377	1.72885e-08
115.486	3.60634e-09	115.477	1.51961e-08	115.477	1.68002e-08
115.586	2.38564e-09	115.577	1.57759e-08	115.577	1.73801e-08
115.686	2.44667e-09	115.677	1.56538e-08	115.677	1.7258e-08
115.786	2.81289e-09	115.777	1.54707e-08	115.777	1.70749e-08
115.886	2.8434e-09	115.877	1.52571e-08	115.877	1.68613e-08
115.986	2.90444e-09	115.977	1.61116e-08	115.977	1.77158e-08
116.086	2.90444e-09	116.077	1.54402e-08	116.077	1.70444e-08
116.186	2.6603e-09	116.177	1.51045e-08	116.177	1.67087e-08
116.286	2.38564e-09	116.277	1.52876e-08	116.277	1.68918e-08
116.386	2.35512e-09	116.377	1.44026e-08	116.377	1.60068e-08
116.486	1.53115e-09	116.477	1.42805e-08	116.477	1.58847e-08
116.586	5.85102e-10	116.577	1.39754e-08	116.577	1.55795e-08
116.686	-2.38873e-10	116.677	1.39448e-08	116.677	1.5549e-08
116.786	-1.77838e-10	116.777	1.36091e-08	116.777	1.52133e-08
116.886	3.57855e-11	116.877	1.35481e-08	116.877	1.51523e-08
116.986	-2.08355e-10	116.977	1.34871e-08	116.977	1.50912e-08
117.086	-4.52496e-10	117.077	1.30293e-08	117.077	1.46335e-08
117.186	8.29243e-10	117.177	1.32735e-08	117.177	1.48776e-08
117.286	1.47011e-09	117.277	1.32429e-08	117.277	1.48471e-08
117.386	6.15619e-10	117.377	1.40059e-08	117.377	1.561e-08
117.486	2.49409e-10	117.477	1.26021e-08	117.477	1.42062e-08
117.586	2.79926e-10	117.577	1.26021e-08	117.577	1.42062e-08
117.686	4.01996e-10	117.677	1.20833e-08	117.677	1.36874e-08
117.786	3.71479e-10	117.777	1.19612e-08	117.777	1.35654e-08
117.886	8.29243e-10	117.877	1.1534e-08	117.877	1.31381e-08
117.986	7.68207e-10	117.977	1.12898e-08	117.977	1.2894e-08
118.086	7.68207e-10	118.077	1.12898e-08	118.077	1.2894e-08
118.186	7.3769e-10	118.177	1.14424e-08	118.177	1.30466e-08
118.286	5.85102e-10	118.277	1.13203e-08	118.277	1.29245e-08
118.386	7.98725e-10	118.377	1.08626e-08	118.377	1.24667e-08
118.486	2.18891e-10	118.477	1.13814e-08	118.477	1.29855e-08
118.586	5.24067e-10	118.577	1.03438e-08	118.577	1.19479e-08
118.686	-4.21978e-10	118.677	1.0771e-08	118.677	1.23752e-08
118.786	9.68207e-11	118.777	9.886e-09	118.777	1.14902e-08
118.886	-2.6939e-10	118.877	1.00386e-08	118.877	1.16428e-08
118.986	-6.35601e-10	118.977	9.76393e-09	118.977	1.13681e-08
119.086	-1.27647e-09	119.077	1.02522e-08	119.077	1.18564e-08
119.186	-2.03941e-09	119.177	1.00081e-08	119.177	1.16122e-08
119.286	-8.49224e-10	119.277	9.67238e-09	119.277	1.12765e-08
119.386	-5.74566e-10	119.377	9.73341e-09	119.377	1.13376e-08
119.486	-9.40777e-10	119.477	9.45876e-09	119.477	1.10629e-08
119.586	-9.10259e-10	119.577	9.00099e-09	119.577	1.06052e-08
119.686	-1.09336e-09	119.677	8.93996e-09	119.677	1.05441e-08
119.786	-7.57672e-10	119.777	9.1841e-09	119.777	1.07883e-08
119.886	-1.18492e-09	119.877	8.97047e-09	119.877	1.05746e-08
119.986	-2.03941e-09	119.977	8.93996e-09	119.977	1.05441e-08
120.086	-3.56529e-09	120.077	8.51271e-09	120.077	1.01169e-08
120.186	-2.34459e-09	120.177	7.38356e-09	120.177	8.98773e-09
120.286	-2.06993e-09	120.277	7.78029e-09	120.277	9.38446e-09
120.386	-2.10044e-09	120.377	7.90236e-09	120.377	9.50653e-09
120.486	-1.97837e-09	120.477	7.20045e-09	120.477	8.80462e-09
120.586	-1.79527e-09	120.577	8.54323e-09	120.577	1.01474e-08
120.686	-1.00181e-09	120.677	1.02217e-08	120.677	1.18259e-08
120.786	-6.35601e-10	120.777	1.13203e-08	120.777	1.29245e-08
120.886	-1.16802e-10	120.877	1.21748e-08	120.877	1.3779e-08
120.986	-1.09336e-09	120.977	1.30903e-08	120.977	1.46945e-08
121.086	4.32514e-10	121.077	1.35481e-08	121.077	1.51523e-08
121.186	8.29243e-10	121.177	1.47383e-08	121.177	1.63425e-08
121.286	1.22597e-09	121.277	1.52571e-08	121.277	1.68613e-08
121.386	1.65322e-09	121.377	1.60506e-08	121.377	1.76547e-08
121.486	1.65322e-09	121.477	1.64778e-08	121.477	1.8082e-08
121.586	5.24067e-10	121.577	1.71187e-08	121.577	1.87228e-08
121.686	1.50063e-09	121.677	1.74238e-08	121.677	1.9028e-08
121.786	1.83632e-09	121.777	1.77901e-08	121.777	1.93942e-08
121.886	1.53115e-09	121.877	1.83089e-08	121.877	1.9913e-08
121.986	1.65322e-09	121.977	1.88887e-08	121.977	2.04929e-08
122.086	1.25649e-09	122.077	1.86751e-08	122.077	2.02792e-08
122.186	9.20795e-10	122.177	1.98652e-08	122.177	2.14694e-08
122.286	2.3246e-09	122.277	1.97432e-08	122.277	2.13473e-08
122.386	1.6227e-09	122.377	2.01704e-08	122.377	2.17746e-08
122.486	1.43959e-09	122.477	1.9438e-08	122.477	2.10422e-08
122.586	2.59926e-09	122.577	1.99873e-08	122.577	2.15915e-08
122.686	3.42324e-09	122.677	2.0384e-08	122.677	2.19882e-08
122.786	3.72841e-09	122.777	2.10249e-08	122.777	2.26291e-08
122.886	3.66738e-09	122.877	2.08113e-08	122.877	2.24155e-08
122.986	3.94204e-09	122.977	2.14827e-08	122.977	2.30869e-08
123.086	4.46083e-09	123.077	2.19404e-08	123.077	2.35446e-08
123.186	4.61342e-09	123.177	2.22151e-08	123.177	2.38193e-08
123.286	5.07119e-09	123.277	2.23677e-08	123.277	2.39719e-08
123.386	4.67446e-09	123.377	2.18184e-08	123.377	2.34225e-08
123.486	5.34584e-09	123.477	2.32527e-08	123.477	2.48569e-08
123.586	5.89516e-09	123.577	2.34663e-08	123.577	2.50705e-08
123.686	6.47499e-09	123.677	2.39851e-08	123.677	2.55893e-08
123.786	6.38344e-09	123.777	2.30391e-08	123.777	2.46432e-08
123.886	6.01723e-09	123.877	2.31001e-08	123.877	2.47043e-08
123.986	6.47499e-09	123.977	2.35579e-08	123.977	2.5162e-08
124.086	6.6581e-09	124.077	2.3741e-08	124.077	2.53452e-08
124.186	7.08535e-09	124.177	2.43208e-08	124.177	2.5925e-08
124.286	6.62758e-09	124.277	2.47481e-08	124.277	2.63522e-08
124.386	7.97036e-09	124.377	2.51448e-08	124.377	2.6749e-08
124.486	6.87172e-09	124.477	2.51753e-08	124.477	2.67795e-08
124.586	6.84121e-09	124.577	2.545e-08	124.577	2.70541e-08
124.686	6.71914e-09	124.677	2.53889e-08	124.677	2.69931e-08
124.786	7.72622e-09	124.777	2.5572e-08	124.777	2.71762e-08
124.886	8.61122e-09	124.877	2.73115e-08	124.877	2.89157e-08
124.986	8.30605e-09	124.977	2.7281e-08	124.977	2.88852e-08
125.086	8.09243e-09	125.077	2.73726e-08	125.077	2.89767e-08
125.186	8.06191e-09	125.177	2.75252e-08	125.177	2.91293e-08
125.286	9.09951e-09	125.277	2.8044e-08	125.277	2.96481e-08
125.386	9.58779e-09	125.377	2.74641e-08	125.377	2.90683e-08
125.486	1.05033e-08	125.477	2.78914e-08	125.477	2.94955e-08
125.586	1.01066e-08	125.577	2.8105e-08	125.577	2.97092e-08
125.686	1.00761e-08	125.677	2.80134e-08	125.677	2.96176e-08
125.786	1.03507e-08	125.777	2.86543e-08	125.777	3.02585e-08
125.886	1.06254e-08	125.877	2.84712e-08	125.877	3.00754e-08
125.986	1.03507e-08	125.977	2.95088e-08	125.977	3.1113e-08
126.086	1.0015e-08	126.077	2.88679e-08	126.077	3.04721e-08
126.186	9.954e-09	126.177	2.94783e-08	126.177	3.10825e-08
126.286	1.07169e-08	126.277	2.99055e-08	126.277	3.15097e-08
126.386	1.02592e-08	126.377	3.06074e-08	126.377	3.22116e-08
126.486	1.11747e-08	126.477	3.0699e-08	126.477	3.23032e-08
126.586	1.11137e-08	126.577	3.08211e-08	126.577	3.24252e-08
126.686	1.16935e-08	126.677	3.05464e-08	126.677	3.21506e-08
126.786	1.11137e-08	126.777	3.10042e-08	126.777	3.26083e-08
126.886	1.08085e-08	126.877	3.14314e-08	126.877	3.30356e-08
126.986	1.09306e-08	126.977	3.22554e-08	126.977	3.38596e-08
127.086	1.23649e-08	127.077	3.2469e-08	127.077	3.40732e-08
127.186	1.2487e-08	127.177	3.22859e-08	127.177	3.38901e-08
127.286	1.13883e-08	127.277	3.19807e-08	127.277	3.35849e-08
127.386	1.20597e-08	127.377	3.26826e-08	127.377	3.42868e-08
127.486	1.11442e-08	127.477	3.2469e-08	127.477	3.40732e-08
127.586	1.12968e-08	127.577	3.21028e-08	127.577	3.3707e-08
127.686	1.10221e-08	127.677	3.20723e-08	127.677	3.36765e-08
127.786	1.07475e-08	127.777	3.27742e-08	127.777	3.43784e-08
127.886	1.06254e-08	127.877	3.32014e-08	127.877	3.48056e-08
127.986	1.08085e-08	127.977	3.28963e-08	127.977	3.45004e-08
128.086	1.21207e-08	128.077	3.29878e-08	128.077	3.4592e-08
128.186	1.32499e-08	128.177	3.35676e-08	128.177	3.51718e-08
128.286	1.29447e-08	128.277	3.36897e-08	128.277	3.52939e-08
128.386	1.33414e-08	128.377	3.37507e-08	128.377	3.53549e-08
128.486	1.30058e-08	128.477	3.39949e-08	128.477	3.55991e-08
128.586	1.3494e-08	128.577	3.41475e-08	128.577	3.57516e-08
128.686	1.35551e-08	128.677	3.23469e-08	128.677	3.39511e-08
128.786	1.30363e-08	128.777	3.1645e-08	128.777	3.32492e-08
128.886	1.38908e-08	128.877	3.2469e-08	128.877	3.40732e-08
128.986	1.38297e-08	128.977	3.36592e-08	128.977	3.52634e-08
129.086	1.39823e-08	129.077	3.36592e-08	129.077	3.52634e-08
129.186	1.39213e-08	129.177	3.39339e-08	129.177	3.5538e-08
129.286	1.40739e-08	129.277	3.45747e-08	129.277	3.61789e-08
129.386	1.42875e-08	129.377	3.51851e-08	129.377	3.67892e-08
129.486	1.43485e-08	129.477	3.50325e-08	129.477	3.66367e-08
129.586	1.42265e-08	129.577	3.52461e-08	129.577	3.68503e-08
129.686	1.4318e-08	129.677	3.47273e-08	129.677	3.63315e-08
129.786	1.30668e-08	129.777	3.52156e-08	129.777	3.68198e-08
129.886	1.39518e-08	129.877	3.56123e-08	129.877	3.72165e-08
129.986	1.40434e-08	129.977	3.58259e-08	129.977	3.74301e-08
130.086	1.38297e-08	130.077	3.61006e-08	130.077	3.77048e-08
130.186	1.4257e-08	130.177	3.43916e-08	130.177	3.59958e-08
130.286	1.43485e-08	130.277	3.28352e-08	130.277	3.44394e-08
130.386	1.43485e-08	130.377	3.23775e-08	130.377	3.39816e-08
130.486	1.46842e-08	130.477	3.09431e-08	130.477	3.25473e-08
130.586	1.4379e-08	130.577	3.03938e-08	130.577	3.1998e-08
130.686	1.35856e-08	130.677	3.08821e-08	130.677	3.24863e-08
130.786	1.34635e-08	130.777	3.00581e-08	130.777	3.16623e-08
130.886	1.32499e-08	130.877	2.9875e-08	130.877	3.14792e-08
130.986	1.29447e-08	130.977	2.90816e-08	130.977	3.06857e-08
131.086	1.13273e-08	131.077	2.82576e-08	131.077	2.98618e-08
131.186	1.05033e-08	131.177	2.77998e-08	131.177	2.9404e-08
131.286	1.19987e-08	131.277	2.7159e-08	131.277	2.87631e-08
131.386	1.16019e-08	131.377	2.6396e-08	131.377	2.80002e-08
131.486	1.14799e-08	131.477	2.62129e-08	131.477	2.78171e-08
131.586	1.09e-08	131.577	2.56636e-08	131.577	2.72678e-08
131.686	1.06864e-08	131.677	2.54194e-08	131.677	2.70236e-08
131.786	1.11442e-08	131.777	2.54805e-08	131.777	2.70847e-08
131.886	1.06559e-08	131.877	2.59382e-08	131.877	2.75424e-08
131.986	1.03812e-08	131.977	2.58162e-08	131.977	2.74203e-08
132.086	1.05949e-08	132.077	2.49617e-08	132.077	2.65659e-08
132.186	1.01371e-08	132.177	2.49006e-08	132.177	2.65048e-08
132.286	1.00761e-08	132.277	2.41072e-08	132.277	2.57114e-08
132.386	9.4352e-09	132.377	2.34053e-08	132.377	2.50095e-08
132.486	9.74038e-09	132.477	2.38325e-08	132.477	2.54367e-08
132.586	9.09951e-09	132.577	2.27339e-08	132.577	2.43381e-08
132.686	8.42812e-09	132.677	2.26423e-08	132.677	2.42465e-08
132.786	9.61831e-09	132.777	2.34053e-08	132.777	2.50095e-08
132.886	8.64174e-09	132.877	2.30391e-08	132.877	2.46432e-08
132.986	8.61122e-09	132.977	2.25813e-08	132.977	2.41855e-08
133.086	8.33657e-09	133.077	2.30391e-08	133.077	2.46432e-08
133.186	7.72622e-09	133.177	2.31001e-08	133.177	2.47043e-08
133.286	8.30605e-09	133.277	2.27034e-08	133.277	2.43076e-08
133.386	8.45864e-09	133.377	2.18794e-08	133.377	2.34836e-08
133.486	8.85537e-09	133.477	2.13606e-08	133.477	2.29648e-08
133.586	8.51967e-09	133.577	2.02925e-08	133.577	2.18967e-08
133.686	8.61122e-09	133.677	2.02925e-08	133.677	2.18967e-08
133.786	7.93984e-09	133.777	1.98042e-08	133.777	2.14084e-08
133.886	7.39052e-09	133.877	2.06282e-08	133.877	2.22324e-08
133.986	7.29897e-09	133.977	1.96516e-08	133.977	2.12558e-08
134.086	7.32949e-09	134.077	1.90413e-08	134.077	2.06454e-08
134.186	6.87172e-09	134.177	1.88887e-08	134.177	2.04929e-08
134.286	6.84121e-09	134.277	1.86445e-08	134.277	2.02487e-08
134.386	6.32241e-09	134.377	1.89192e-08	134.377	2.05234e-08
134.486	5.4374e-09	134.477	1.88277e-08	134.477	2.04318e-08
134.586	5.86464e-09	134.577	1.85225e-08	134.577	2.01266e-08
134.686	4.3998e-09	134.677	1.8553e-08	134.677	2.01572e-08
134.786	4.12514e-09	134.777	1.8492e-08	134.777	2.00961e-08
134.886	5.49843e-09	134.877	1.78816e-08	134.877	1.94858e-08
134.986	4.67446e-09	134.977	1.79426e-08	134.977	1.95468e-08
135.086	4.21669e-09	135.077	1.73628e-08	135.077	1.8967e-08
135.186	5.07119e-09	135.177	1.75154e-08	135.177	1.91196e-08
135.286	5.52895e-09	135.277	1.81257e-08	135.277	1.97299e-08
135.386	5.22377e-09	135.377	1.76375e-08	135.377	1.92416e-08
135.486	5.28481e-09	135.477	1.73628e-08	135.477	1.8967e-08
135.586	4.85756e-09	135.577	1.69356e-08	135.577	1.85397e-08
135.686	4.79653e-09	135.677	1.67219e-08	135.677	1.83261e-08
135.786	3.85048e-09	135.777	1.69356e-08	135.777	1.85397e-08
135.886	3.20961e-09	135.877	1.65388e-08	135.877	1.8143e-08
135.986	3.48427e-09	135.977	1.62031e-08	135.977	1.78073e-08
136.086	4.03359e-09	136.077	1.57454e-08	136.077	1.73495e-08
136.186	5.46791e-09	136.177	1.58064e-08	136.177	1.74106e-08
136.286	4.82705e-09	136.277	1.61726e-08	136.277	1.77768e-08
136.386	4.24721e-09	136.377	1.58674e-08	136.377	1.74716e-08
136.486	3.81997e-09	136.477	1.62947e-08	136.477	1.78989e-08
136.586	3.27065e-09	136.577	1.5135e-08	136.577	1.67392e-08
136.686	4.00307e-09	136.677	1.46773e-08	136.677	1.62814e-08
136.786	3.60634e-09	136.777	1.47993e-08	136.777	1.64035e-08
136.886	3.20961e-09	136.877	1.45247e-08	136.877	1.61288e-08
136.986	3.08754e-09	136.977	1.44026e-08	136.977	1.60068e-08
137.086	2.90444e-09	137.077	1.40364e-08	137.077	1.56406e-08
137.186	3.24013e-09	137.177	1.425e-08	137.177	1.58542e-08
137.286	2.6603e-09	137.277	1.38838e-08	137.277	1.5488e-08
137.386	3.54531e-09	137.377	1.39754e-08	137.377	1.55795e-08
137.486	3.75893e-09	137.477	1.3426e-08	137.477	1.50302e-08
137.586	3.39272e-09	137.577	1.43721e-08	137.577	1.59763e-08
137.686	2.87392e-09	137.677	1.29988e-08	137.677	1.4603e-08
137.786	3.24013e-09	137.777	1.30293e-08	137.777	1.46335e-08
137.886	3.94204e-09	137.877	1.28767e-08	137.877	1.44809e-08
137.986	4.21669e-09	137.977	1.27547e-08	137.977	1.43588e-08
138.086	2.56874e-09	138.077	1.26326e-08	138.077	1.42368e-08
138.186	2.53823e-09	138.177	1.29072e-08	138.177	1.45114e-08
138.286	2.90444e-09	138.277	1.2419e-08	138.277	1.40231e-08
138.386	1.40908e-09	138.377	1.22053e-08	138.377	1.38095e-08
138.486	2.20253e-09	138.477	1.15645e-08	138.477	1.31686e-08
138.586	1.77529e-09	138.577	1.11067e-08	138.577	1.27109e-08
138.686	2.44667e-09	138.677	1.1534e-08	138.677	1.31381e-08
138.786	1.86684e-09	138.777	1.08931e-08	138.777	1.24973e-08
138.886	1.86684e-09	138.877	1.09846e-08	138.877	1.25888e-08
138.986	1.71425e-09	138.977	1.13814e-08	138.977	1.29855e-08
139.086	1.95839e-09	139.077	1.12898e-08	139.077	1.2894e-08
139.186	1.74477e-09	139.177	1.10762e-08	139.177	1.26804e-08
139.286	1.19545e-09	139.277	1.12593e-08	139.277	1.28635e-08
139.386	1.28701e-09	139.377	1.11677e-08	139.377	1.27719e-08
139.486	1.1039e-09	139.477	1.04658e-08	139.477	1.207e-08
139.586	6.76655e-10	139.577	1.01301e-08	139.577	1.17343e-08
139.686	1.57856e-10	139.677	9.94704e-09	139.677	1.15512e-08
139.786	9.51313e-10	139.777	1.071e-08	139.777	1.23141e-08
139.886	1.59218e-09	139.877	9.55031e-09	139.877	1.11545e-08
139.986	7.68207e-10	139.977	9.85548e-09	139.977	1.14597e-08
140.086	6.15619e-10	140.077	9.48927e-09	140.077	1.10934e-08
140.186	4.93549e-10	140.177	8.97047e-09	140.177	1.05746e-08
140.286	3.71479e-10	140.277	9.3672e-09	140.277	1.09714e-08
140.386	9.8183e-10	140.377	9.15358e-09	140.377	1.07577e-08
140.486	1.65322e-09	140.477	8.75685e-09	140.477	1.0361e-08
140.586	2.23305e-09	140.577	8.54323e-09	140.577	1.01474e-08
140.686	1.71425e-09	140.677	9.58083e-09	140.677	1.1185e-08
140.786	1.71425e-09	140.777	1.09846e-08	140.777	1.25888e-08
140.886	2.81289e-09	140.877	1.25715e-08	140.877	1.41757e-08
140.986	3.05703e-09	140.977	1.34871e-08	140.977	1.50912e-08
141.086	3.30117e-09	141.077	1.37923e-08	141.077	1.53964e-08
141.186	3.3622e-09	141.177	1.47993e-08	141.177	1.64035e-08
141.286	3.60634e-09	141.277	1.57454e-08	141.277	1.73495e-08
141.386	3.75893e-09	141.377	1.53486e-08	141.377	1.69528e-08
141.486	4.67446e-09	141.477	1.54707e-08	141.477	1.70749e-08
141.586	4.36928e-09	141.577	1.55012e-08	141.577	1.71054e-08
141.686	3.48427e-09	141.677	1.62642e-08	141.677	1.78683e-08
141.786	4.5829e-09	141.777	1.69966e-08	141.777	1.86008e-08
141.886	4.70497e-09	141.877	1.73323e-08	141.877	1.89365e-08
141.986	4.00307e-09	141.977	1.69356e-08	141.977	1.85397e-08
142.086	3.54531e-09	142.077	1.83394e-08	142.077	1.99435e-08
142.186	4.12514e-09	142.177	1.88582e-08	142.177	2.04623e-08
142.286	3.30117e-09	142.277	1.89802e-08	142.277	2.05844e-08
142.386	4.97963e-09	142.377	1.92244e-08	142.377	2.08286e-08
142.486	5.40688e-09	142.477	1.98347e-08	142.477	2.14389e-08
142.586	5.6205e-09	142.577	1.98347e-08	142.577	2.14389e-08
142.686	5.80361e-09	142.677	2.04756e-08	142.677	2.20798e-08
142.786	4.67446e-09	142.777	2.13911e-08	142.777	2.29953e-08
142.886	4.97963e-09	142.877	2.2093e-08	142.877	2.36972e-08
142.986	4.46083e-09	142.977	2.26118e-08	142.977	2.4216e-08
143.086	4.82705e-09	143.077	2.25508e-08	143.077	2.4155e-08
143.186	5.4374e-09	143.177	2.27339e-08	143.177	2.43381e-08
143.286	6.6581e-09	143.277	2.21846e-08	143.277	2.37888e-08
143.386	6.99379e-09	143.377	2.25203e-08	143.377	2.41244e-08
143.486	7.08535e-09	143.477	2.31001e-08	143.477	2.47043e-08
143.586	6.93276e-09	143.577	2.2978e-08	143.577	2.45822e-08
143.686	6.84121e-09	143.677	2.32527e-08	143.677	2.48569e-08
143.786	6.87172e-09	143.777	2.3741e-08	143.777	2.53452e-08
143.886	6.07827e-09	143.877	2.34968e-08	143.877	2.5101e-08
143.986	6.68862e-09	143.977	2.43513e-08	143.977	2.59555e-08
144.086	6.20034e-09	144.077	2.44429e-08	144.077	2.60471e-08
144.186	7.23793e-09	144.177	2.44429e-08	144.177	2.60471e-08
144.286	6.99379e-09	144.277	2.48091e-08	144.277	2.64133e-08
144.386	7.26845e-09	144.377	2.56026e-08	144.377	2.72067e-08
144.486	7.72622e-09	144.477	2.59382e-08	144.477	2.75424e-08
144.586	7.90932e-09	144.577	2.58772e-08	144.577	2.74814e-08
144.686	7.93984e-09	144.677	2.6457e-08	144.677	2.80612e-08
144.786	7.75673e-09	144.777	2.6396e-08	144.777	2.80002e-08
144.886	8.55019e-09	144.877	2.70369e-08	144.877	2.86411e-08
144.986	8.85537e-09	144.977	2.73421e-08	144.977	2.89462e-08
145.086	8.51967e-09	145.077	2.69148e-08	145.077	2.8519e-08
145.186	7.72622e-09	145.177	2.80745e-08	145.177	2.96786e-08
145.286	8.94692e-09	145.277	2.8166e-08	145.277	2.97702e-08
145.386	9.34365e-09	145.377	2.83797e-08	145.377	2.99838e-08
145.486	9.89296e-09	145.477	2.83491e-08	145.477	2.99533e-08
145.586	9.74038e-09	145.577	2.83186e-08	145.577	2.99228e-08
145.686	9.74038e-09	145.677	2.87153e-08	145.677	3.03195e-08
145.786	8.06191e-09	145.777	2.88069e-08	145.777	3.04111e-08
145.886	8.79433e-09	145.877	2.92036e-08	145.877	3.08078e-08
145.986	8.67226e-09	145.977	2.94173e-08	145.977	3.10214e-08
146.086	9.86245e-09	146.077	2.93257e-08	146.077	3.09299e-08
146.186	9.98452e-09	146.177	3.00276e-08	146.177	3.16318e-08
146.286	9.49623e-09	146.277	2.97529e-08	146.277	3.13571e-08
146.386	1.0778e-08	146.377	2.99971e-08	146.377	3.16013e-08
146.486	1.03812e-08	146.477	3.00581e-08	146.477	3.16623e-08
146.586	1.01066e-08	146.577	3.01192e-08	146.577	3.17233e-08
146.686	1.07169e-08	146.677	3.04243e-08	146.677	3.20285e-08
146.786	1.14494e-08	146.777	3.07905e-08	146.777	3.23947e-08
146.886	1.1724e-08	146.877	3.07905e-08	146.877	3.23947e-08
146.986	1.03507e-08	146.977	3.04548e-08	146.977	3.2059e-08
147.086	1.09611e-08	147.077	3.09736e-08	147.077	3.25778e-08
147.186	1.13578e-08	147.177	3.12788e-08	147.177	3.2883e-08
147.286	1.18766e-08	147.277	3.15535e-08	147.277	3.31577e-08
147.386	1.0778e-08	147.377	3.19502e-08	147.377	3.35544e-08
147.486	1.18461e-08	147.477	3.1523e-08	147.477	3.31271e-08
147.586	1.19376e-08	147.577	3.20723e-08	147.577	3.36765e-08
147.686	1.12663e-08	147.677	3.26521e-08	147.677	3.42563e-08
147.786	1.0778e-08	147.777	3.27742e-08	147.777	3.43784e-08
147.886	1.03507e-08	147.877	3.24385e-08	147.877	3.40427e-08
147.986	1.15714e-08	147.977	3.31404e-08	147.977	3.47446e-08
148.086	1.11137e-08	148.077	3.29878e-08	148.077	3.4592e-08
148.186	1.05033e-08	148.177	3.29878e-08	148.177	3.4592e-08
148.286	1.03202e-08	148.277	3.4117e-08	148.277	3.57211e-08
148.386	1.12052e-08	148.377	3.37813e-08	148.377	3.53854e-08
148.486	1.28837e-08	148.477	3.33845e-08	148.477	3.49887e-08
148.586	1.28227e-08	148.577	3.38118e-08	148.577	3.5416e-08
148.686	1.24564e-08	148.677	3.43001e-08	148.677	3.59042e-08
148.786	1.32194e-08	148.777	3.42085e-08	148.777	3.58127e-08
148.886	1.36771e-08	148.877	3.39949e-08	148.877	3.55991e-08
148.986	1.3433e-08	148.977	3.36287e-08	148.977	3.52328e-08
149.086	1.38602e-08	149.077	3.45747e-08	149.077	3.61789e-08
149.186	1.37687e-08	149.177	3.46052e-08	149.177	3.62094e-08
149.286	1.39823e-08	149.277	3.44221e-08	149.277	3.60263e-08
149.386	1.44706e-08	149.377	3.47273e-08	149.377	3.63315e-08
149.486	1.42265e-08	149.477	3.50325e-08	149.477	3.66367e-08
149.586	1.37687e-08	149.577	3.56123e-08	149.577	3.72165e-08
149.686	1.39213e-08	149.677	3.49715e-08	149.677	3.65756e-08
149.786	1.29752e-08	149.777	3.52461e-08	149.777	3.68503e-08
149.886	1.26395e-08	149.877	3.57954e-08	149.877	3.73996e-08
149.986	1.35246e-08	149.977	3.63142e-08	149.977	3.79184e-08
150.086	1.41044e-08	150.077	3.64058e-08	150.077	3.80099e-08
150.186	1.44401e-08	150.177	3.66499e-08	150.177	3.82541e-08
150.286	1.41044e-08	150.277	3.65584e-08	150.277	3.81625e-08
150.386	1.35551e-08	150.377	3.65584e-08	150.377	3.81625e-08
150.486	1.3494e-08	150.477	3.48799e-08	150.477	3.64841e-08
150.586	1.37992e-08	150.577	3.34456e-08	150.577	3.50497e-08
150.686	1.29752e-08	150.677	3.27131e-08	150.677	3.43173e-08
150.786	1.19071e-08	150.777	3.11262e-08	150.777	3.27304e-08
150.886	1.33414e-08	150.877	3.10652e-08	150.877	3.26694e-08
150.986	1.27921e-08	150.977	3.00276e-08	150.977	3.16318e-08
151.086	1.31278e-08	151.077	2.97224e-08	151.077	3.13266e-08
151.186	1.28227e-08	151.177	3.00886e-08	151.177	3.16928e-08
151.286	1.30363e-08	151.277	2.94783e-08	151.277	3.10825e-08
151.386	1.14494e-08	151.377	2.92647e-08	151.377	3.08688e-08
151.486	1.21207e-08	151.477	2.88069e-08	151.477	3.04111e-08
151.586	1.20902e-08	151.577	2.9051e-08	151.577	3.06552e-08
151.686	1.21818e-08	151.677	2.85933e-08	151.677	3.01974e-08
151.786	1.14799e-08	151.777	2.81965e-08	151.777	2.98007e-08
151.886	1.04728e-08	151.877	2.80745e-08	151.877	2.96786e-08
151.986	1.07169e-08	151.977	2.75557e-08	151.977	2.91598e-08
152.086	1.05033e-08	152.077	2.69758e-08	152.077	2.858e-08
152.186	1.10831e-08	152.177	2.67622e-08	152.177	2.83664e-08
152.286	9.74038e-09	152.277	2.59688e-08	152.277	2.75729e-08
152.386	1.02897e-08	152.377	2.57857e-08	152.377	2.73898e-08
152.486	9.22158e-09	152.477	2.56026e-08	152.477	2.72067e-08
152.586	9.22158e-09	152.577	2.43513e-08	152.577	2.59555e-08
152.686	8.55019e-09	152.677	2.41072e-08	152.677	2.57114e-08
152.786	9.67934e-09	152.777	2.36799e-08	152.777	2.52841e-08
152.886	8.03139e-09	152.877	2.31001e-08	152.877	2.47043e-08
152.986	9.09951e-09	152.977	2.36799e-08	152.977	2.52841e-08
153.086	8.64174e-09	153.077	2.38631e-08	153.077	2.54672e-08
153.186	8.24501e-09	153.177	2.38936e-08	153.177	2.54977e-08
153.286	7.78725e-09	153.277	2.34358e-08	153.277	2.504e-08
153.386	6.96328e-09	153.377	2.32222e-08	153.377	2.48264e-08
153.486	7.75673e-09	153.477	2.27034e-08	153.477	2.43076e-08
153.586	7.75673e-09	153.577	2.27949e-08	153.577	2.43991e-08
153.686	7.32949e-09	153.677	2.24898e-08	153.677	2.40939e-08
153.786	7.32949e-09	153.777	2.19099e-08	153.777	2.35141e-08
153.886	7.51259e-09	153.877	2.17573e-08	153.877	2.33615e-08
153.986	7.14638e-09	153.977	2.16048e-08	153.977	2.32089e-08
154.086	6.96328e-09	154.077	2.06892e-08	154.077	2.22934e-08
154.186	6.99379e-09	154.177	2.0323e-08	154.177	2.19272e-08
154.286	6.78017e-09	154.277	1.94075e-08	154.277	2.10117e-08
154.386	6.99379e-09	154.377	1.95906e-08	154.377	2.11948e-08
154.486	6.81069e-09	154.477	1.91023e-08	154.477	2.07065e-08
154.586	6.6581e-09	154.577	1.97127e-08	154.577	2.13168e-08
154.686	6.78017e-09	154.677	2.05672e-08	154.677	2.21713e-08
154.786	6.71914e-09	154.777	1.98958e-08	154.777	2.14999e-08
154.886	5.98671e-09	154.877	1.99568e-08	154.877	2.1561e-08
154.986	5.07119e-09	154.977	1.96821e-08	154.977	2.12863e-08
155.086	4.88808e-09	155.077	1.95601e-08	155.077	2.11642e-08
155.186	6.41396e-09	155.177	1.90718e-08	155.177	2.0676e-08
155.286	5.77309e-09	155.277	1.91939e-08	155.277	2.0798e-08
155.386	5.04067e-09	155.377	1.9377e-08	155.377	2.09811e-08
155.486	4.88808e-09	155.477	1.88582e-08	155.477	2.04623e-08
155.586	4.46083e-09	155.577	1.89802e-08	155.577	2.05844e-08
155.686	4.03359e-09	155.677	1.79732e-08	155.677	1.95773e-08
155.786	4.82705e-09	155.777	1.74849e-08	155.777	1.9089e-08
[truncated: 500 more rows]
