# Supplementary material for: In-depth chiral sensing capability of C-dots in a biomimetic protein-based hydrogel: a probe for chiral recognition applications
Source: Royal Society of Chemistry journal article supplement (doi:10.1039/d5bm01508a), 2026-01-01
Supplement: d5bm01508a1.zip [file Figure S13.xlsx]

## Sheet: Figure S13
-0.99762	-0.000984558	-0.99762	-0.000999969	-0.99762	-0.000999969
-0.99518	-0.000913696	-0.99518	-0.00104	-0.99518	-0.00121
-0.99274	-0.000860901	-0.99274	-0.001	-0.99274	-0.00115
-0.9903	-0.000818176	-0.9903	-0.000958557	-0.9903	-0.0011
-0.98785	-0.000782166	-0.98785	-0.000919495	-0.98785	-0.00106
-0.98541	-0.000751648	-0.98541	-0.000883484	-0.98541	-0.00102
-0.98297	-0.000725708	-0.98297	-0.00085144	-0.98297	-0.000978088
-0.98053	-0.000702209	-0.98053	-0.000821533	-0.98053	-0.000942688
-0.97809	-0.000681458	-0.97809	-0.000794373	-0.97809	-0.000910645
-0.97565	-0.000661926	-0.97565	-0.000768738	-0.97565	-0.000880737
-0.97321	-0.000643921	-0.97321	-0.000744629	-0.97321	-0.000853577
-0.97076	-0.000627136	-0.97076	-0.000722351	-0.97076	-0.000827637
-0.96832	-0.000610962	-0.96832	-0.000701294	-0.96832	-0.000803528
-0.96588	-0.000595398	-0.96588	-0.000681152	-0.96588	-0.00078064
-0.96344	-0.000581055	-0.96344	-0.000662537	-0.96344	-0.000759277
-0.961	-0.000566711	-0.961	-0.000644226	-0.961	-0.000738525
-0.95856	-0.000553284	-0.95856	-0.000627136	-0.95856	-0.000719299
-0.95612	-0.000540161	-0.95612	-0.000610352	-0.95612	-0.000700684
-0.95367	-0.000527344	-0.95367	-0.000594788	-0.95367	-0.000682983
-0.95123	-0.000514832	-0.95123	-0.000579224	-0.95123	-0.000665588
-0.94879	-0.000502625	-0.94879	-0.00056427	-0.94879	-0.000648804
-0.94635	-0.000491058	-0.94635	-0.000549927	-0.94635	-0.000632324
-0.94391	-0.000479645	-0.94391	-0.000536499	-0.94391	-0.000617065
-0.94147	-0.00046814	-0.94147	-0.000522766	-0.94147	-0.000601501
-0.93903	-0.000457245	-0.93903	-0.000509949	-0.93903	-0.000586853
-0.93658	-0.000446289	-0.93658	-0.000497498	-0.93658	-0.000572205
-0.93414	-0.000435333	-0.93414	-0.000485229	-0.93414	-0.000558167
-0.9317	-0.000424896	-0.9317	-0.000473236	-0.9317	-0.000544739
-0.92926	-0.000414734	-0.92926	-0.000461578	-0.92926	-0.000531311
-0.92682	-0.000404694	-0.92682	-0.000450043	-0.92682	-0.000517883
-0.92438	-0.000395111	-0.92438	-0.000438751	-0.92438	-0.000505371
-0.92194	-0.000385468	-0.92194	-0.000427795	-0.92194	-0.000493256
-0.91949	-0.000376282	-0.91949	-0.000417358	-0.91949	-0.000481201
-0.91705	-0.000367035	-0.91705	-0.000406952	-0.91705	-0.000469116
-0.91461	-0.000358215	-0.91461	-0.000397064	-0.91461	-0.000457611
-0.91217	-0.000349426	-0.91217	-0.000387268	-0.91217	-0.000446228
-0.90973	-0.00034079	-0.90973	-0.000377747	-0.90973	-0.000434723
-0.90729	-0.000332245	-0.90729	-0.000368286	-0.90729	-0.000423615
-0.90485	-0.00032431	-0.90485	-0.000359344	-0.90485	-0.000413147
-0.9024	-0.000316101	-0.9024	-0.000350311	-0.9024	-0.000402466
-0.89996	-0.000308258	-0.89996	-0.000341736	-0.89996	-0.000392365
-0.89752	-0.000300537	-0.89752	-0.000333282	-0.89752	-0.000382385
-0.89508	-0.000292969	-0.89508	-0.000325043	-0.89508	-0.00037265
-0.89264	-0.000285553	-0.89264	-0.000316986	-0.89264	-0.000363068
-0.8902	-0.000278229	-0.8902	-0.000309052	-0.8902	-0.000353668
-0.88776	-0.000271027	-0.88776	-0.000301208	-0.88776	-0.00034436
-0.88531	-0.00026416	-0.88531	-0.000293793	-0.88531	-0.00033551
-0.88287	-0.000257233	-0.88287	-0.000286316	-0.88287	-0.000326569
-0.88043	-0.000250671	-0.88043	-0.000279205	-0.88043	-0.000318115
-0.87799	-0.000244049	-0.87799	-0.000272095	-0.87799	-0.00030957
-0.87555	-0.000237793	-0.87555	-0.000265381	-0.87555	-0.000301483
-0.87311	-0.000231598	-0.87311	-0.000258667	-0.87311	-0.000293457
-0.87067	-0.000225555	-0.87067	-0.000252167	-0.87067	-0.000285675
-0.86823	-0.000219513	-0.86823	-0.000245697	-0.86823	-0.000277924
-0.86578	-0.000213776	-0.86578	-0.000239624	-0.86578	-0.000270691
-0.86334	-0.000208038	-0.86334	-0.000233429	-0.86334	-0.000263184
-0.8609	-0.000202667	-0.8609	-0.0002276	-0.8609	-0.000256104
-0.85846	-0.000197235	-0.85846	-0.000221832	-0.85846	-0.000249084
-0.85602	-0.000192017	-0.85602	-0.000216278	-0.85602	-0.000242218
-0.85358	-0.00018689	-0.85358	-0.000210785	-0.85358	-0.000235443
-0.85114	-0.000181915	-0.85114	-0.000205414	-0.85114	-0.000228851
-0.84869	-0.000176971	-0.84869	-0.000200104	-0.84869	-0.00022229
-0.84625	-0.000172302	-0.84625	-0.000195099	-0.84625	-0.000216095
-0.84381	-0.000167603	-0.84381	-0.000190063	-0.84381	-0.0002099
-0.84137	-0.000163208	-0.84137	-0.000185303	-0.84137	-0.00020401
-0.83893	-0.000158752	-0.83893	-0.000180511	-0.83893	-0.00019809
-0.83649	-0.000154572	-0.83649	-0.000176056	-0.83649	-0.000192535
-0.83405	-0.000150452	-0.83405	-0.0001716	-0.83405	-0.000187012
-0.8316	-0.000146484	-0.8316	-0.000167236	-0.8316	-0.000181671
-0.82916	-0.000142517	-0.82916	-0.000162933	-0.82916	-0.000176331
-0.82672	-0.000138794	-0.82672	-0.000158905	-0.82672	-0.000171356
-0.82428	-0.000135071	-0.82428	-0.000154846	-0.82428	-0.000166321
-0.82184	-0.000131561	-0.82184	-0.00015097	-0.82184	-0.000161621
-0.8194	-0.000128082	-0.8194	-0.000147186	-0.8194	-0.000156952
-0.81696	-0.000124756	-0.81696	-0.000143524	-0.81696	-0.000152496
-0.81451	-0.00012149	-0.81451	-0.000139954	-0.81451	-0.000148102
-0.81207	-0.000118347	-0.81207	-0.000136475	-0.81207	-0.00014386
-0.80963	-0.000115265	-0.80963	-0.000133026	-0.80963	-0.000139709
-0.80719	-0.000112366	-0.80719	-0.000129822	-0.80719	-0.000135773
-0.80475	-0.000109467	-0.80475	-0.000126556	-0.80475	-0.000131866
-0.80231	-0.00010675	-0.80231	-0.000123535	-0.80231	-0.000128204
-0.79987	-0.000104034	-0.79987	-0.000120453	-0.79987	-0.000124542
-0.79742	-0.000101532	-0.79742	-0.000117615	-0.79742	-0.000121124
-0.79498	-9.90295e-05	-0.79498	-0.000114807	-0.79498	-0.000117767
-0.79254	-9.65881e-05	-0.79254	-0.000112061	-0.79254	-0.000114532
-0.7901	-9.42078e-05	-0.7901	-0.000109344	-0.7901	-0.000111359
-0.78766	-9.198e-05	-0.78766	-0.000106842	-0.78766	-0.000108368
-0.78522	-8.97522e-05	-0.78522	-0.000104309	-0.78522	-0.000105408
-0.78278	-8.76465e-05	-0.78278	-0.000101929	-0.78278	-0.000102661
-0.78033	-8.56018e-05	-0.78033	-9.96094e-05	-0.78033	-9.99451e-05
-0.77789	-8.36487e-05	-0.77789	-9.73816e-05	-0.77789	-9.73816e-05
-0.77545	-8.17566e-05	-0.77545	-9.52148e-05	-0.77545	-9.48792e-05
-0.77301	-7.99255e-05	-0.77301	-9.31091e-05	-0.77301	-9.24683e-05
-0.77057	-7.8125e-05	-0.77057	-9.10339e-05	-0.77057	-9.00879e-05
-0.76813	-7.64771e-05	-0.76813	-8.90808e-05	-0.76813	-8.79211e-05
-0.76569	-7.48596e-05	-0.76569	-8.71277e-05	-0.76569	-8.57544e-05
-0.76324	-7.33032e-05	-0.76324	-8.53271e-05	-0.76324	-8.37097e-05
-0.7608	-7.17468e-05	-0.7608	-8.34961e-05	-0.7608	-8.16956e-05
-0.75836	-7.03125e-05	-0.75836	-8.17566e-05	-0.75836	-7.9895e-05
-0.75592	-6.88782e-05	-0.75592	-8.01086e-05	-0.75592	-7.8125e-05
-0.75348	-6.75354e-05	-0.75348	-7.84607e-05	-0.75348	-7.64465e-05
-0.75104	-6.61926e-05	-0.75104	-7.68738e-05	-0.75104	-7.47986e-05
-0.7486	-6.49414e-05	-0.7486	-7.54089e-05	-0.7486	-7.32117e-05
-0.74615	-6.37207e-05	-0.74615	-7.39136e-05	-0.74615	-7.16858e-05
-0.74371	-6.2561e-05	-0.74371	-7.25098e-05	-0.74371	-7.02515e-05
-0.74127	-6.14319e-05	-0.74127	-7.11365e-05	-0.74127	-6.88171e-05
-0.73883	-6.03943e-05	-0.73883	-6.98242e-05	-0.73883	-6.74438e-05
-0.73639	-5.93567e-05	-0.73639	-6.85425e-05	-0.73639	-6.61316e-05
-0.73395	-5.83801e-05	-0.73395	-6.72913e-05	-0.73395	-6.48804e-05
-0.73151	-5.74036e-05	-0.73151	-6.60706e-05	-0.73151	-6.36597e-05
-0.72906	-5.65186e-05	-0.72906	-6.49414e-05	-0.72906	-6.25305e-05
-0.72662	-5.56335e-05	-0.72662	-6.37817e-05	-0.72662	-6.14014e-05
-0.72418	-5.48096e-05	-0.72418	-6.27136e-05	-0.72418	-6.03333e-05
-0.72174	-5.40161e-05	-0.72174	-6.16455e-05	-0.72174	-5.92957e-05
-0.7193	-5.32532e-05	-0.7193	-6.06384e-05	-0.7193	-5.83496e-05
-0.71686	-5.25208e-05	-0.71686	-5.96619e-05	-0.71686	-5.7373e-05
-0.71442	-5.18188e-05	-0.71442	-5.86853e-05	-0.71442	-5.64575e-05
-0.71198	-5.11169e-05	-0.71198	-5.77393e-05	-0.71198	-5.55725e-05
-0.70953	-5.04761e-05	-0.70953	-5.68542e-05	-0.70953	-5.47485e-05
-0.70709	-4.98352e-05	-0.70709	-5.59692e-05	-0.70709	-5.39246e-05
-0.70465	-4.93042e-05	-0.70465	-5.51147e-05	-0.70465	-5.31311e-05
-0.70221	-4.87183e-05	-0.70221	-5.45654e-05	-0.70221	-5.23987e-05
-0.69977	-4.81689e-05	-0.69977	-5.40771e-05	-0.69977	-5.16663e-05
-0.69733	-4.7644e-05	-0.69733	-5.34058e-05	-0.69733	-5.09644e-05
-0.69489	-4.69177e-05	-0.69489	-5.26428e-05	-0.69489	-5.0293e-05
-0.69244	-4.64203e-05	-0.69244	-5.18799e-05	-0.69244	-4.96216e-05
-0.69	-4.59595e-05	-0.69	-5.11169e-05	-0.69	-4.90448e-05
-0.68756	-4.54926e-05	-0.68756	-5.0354e-05	-0.68756	-4.84161e-05
-0.68512	-4.50684e-05	-0.68512	-4.96521e-05	-0.68512	-4.78271e-05
-0.68268	-4.4632e-05	-0.68268	-4.89899e-05	-0.68268	-4.72473e-05
-0.68024	-4.42352e-05	-0.68024	-4.83246e-05	-0.68024	-4.64966e-05
-0.6778	-4.38416e-05	-0.6778	-4.76685e-05	-0.6778	-4.59625e-05
-0.67535	-4.34662e-05	-0.67535	-4.70337e-05	-0.67535	-4.54437e-05
-0.67291	-4.31e-05	-0.67291	-4.61975e-05	-0.67291	-4.49463e-05
-0.67047	-4.2749e-05	-0.67047	-4.56116e-05	-0.67047	-4.44672e-05
-0.66803	-4.24072e-05	-0.66803	-4.50226e-05	-0.66803	-4.39911e-05
-0.66559	-4.20898e-05	-0.66559	-4.44733e-05	-0.66559	-4.35455e-05
-0.66315	-4.17725e-05	-0.66315	-4.3927e-05	-0.66315	-4.31061e-05
-0.66071	-4.14673e-05	-0.66071	-4.34052e-05	-0.66071	-4.26819e-05
-0.65826	-4.11682e-05	-0.65826	-4.28986e-05	-0.65826	-4.22668e-05
-0.65582	-4.08722e-05	-0.65582	-4.24042e-05	-0.65582	-4.18793e-05
-0.65338	-4.05853e-05	-0.65338	-4.19159e-05	-0.65338	-4.14825e-05
-0.65094	-4.03198e-05	-0.65094	-4.14642e-05	-0.65094	-4.11102e-05
-0.6485	-4.00391e-05	-0.6485	-4.10034e-05	-0.6485	-4.07349e-05
-0.64606	-3.97858e-05	-0.64606	-4.05792e-05	-0.64606	-4.0387e-05
-0.64362	-3.95294e-05	-0.64362	-4.0152e-05	-0.64362	-4.0036e-05
-0.64117	-3.92944e-05	-0.64117	-3.97552e-05	-0.64117	-3.96973e-05
-0.63873	-3.90564e-05	-0.63873	-3.93616e-05	-0.63873	-3.93768e-05
-0.63629	-3.88275e-05	-0.63629	-3.8974e-05	-0.63629	-3.90564e-05
-0.63385	-3.85956e-05	-0.63385	-3.86017e-05	-0.63385	-3.8739e-05
-0.63141	-3.83728e-05	-0.63141	-3.82538e-05	-0.63141	-3.84338e-05
-0.62897	-3.815e-05	-0.62897	-3.79028e-05	-0.62897	-3.81256e-05
-0.62653	-3.79425e-05	-0.62653	-3.75793e-05	-0.62653	-3.78418e-05
-0.62408	-3.77411e-05	-0.62408	-3.7262e-05	-0.62408	-3.75641e-05
-0.62164	-3.75305e-05	-0.62164	-3.69507e-05	-0.62164	-3.72894e-05
-0.6192	-3.73291e-05	-0.6192	-3.66486e-05	-0.6192	-3.70117e-05
-0.61676	-3.71338e-05	-0.61676	-3.63586e-05	-0.61676	-3.67462e-05
-0.61432	-3.69415e-05	-0.61432	-3.60626e-05	-0.61432	-3.64899e-05
-0.61188	-3.67554e-05	-0.61188	-3.5791e-05	-0.61188	-3.62396e-05
-0.60944	-3.65631e-05	-0.60944	-3.55164e-05	-0.60944	-3.59833e-05
-0.60699	-3.63953e-05	-0.60699	-3.52631e-05	-0.60699	-3.57483e-05
-0.60455	-3.62061e-05	-0.60455	-3.50098e-05	-0.60455	-3.5495e-05
-0.60211	-3.60321e-05	-0.60211	-3.47687e-05	-0.60211	-3.52753e-05
-0.59967	-3.58582e-05	-0.59967	-3.45337e-05	-0.59967	-3.50555e-05
-0.59723	-3.56934e-05	-0.59723	-3.43018e-05	-0.59723	-3.48358e-05
-0.59479	-3.55133e-05	-0.59479	-3.40729e-05	-0.59479	-3.46161e-05
-0.59235	-3.53577e-05	-0.59235	-3.38623e-05	-0.59235	-3.44025e-05
-0.5899	-3.51837e-05	-0.5899	-3.36487e-05	-0.5899	-3.41949e-05
-0.58746	-3.50281e-05	-0.58746	-3.34534e-05	-0.58746	-3.39966e-05
-0.58502	-3.48663e-05	-0.58502	-3.3255e-05	-0.58502	-3.37921e-05
-0.58258	-3.47076e-05	-0.58258	-3.30688e-05	-0.58258	-3.35938e-05
-0.58014	-3.45428e-05	-0.58014	-3.28827e-05	-0.58014	-3.33984e-05
-0.5777	-3.43903e-05	-0.5777	-3.26965e-05	-0.5777	-3.32153e-05
-0.57526	-3.42407e-05	-0.57526	-3.25165e-05	-0.57526	-3.302e-05
-0.57281	-3.40912e-05	-0.57281	-3.23486e-05	-0.57281	-3.2843e-05
-0.57037	-3.39386e-05	-0.57037	-3.21777e-05	-0.57037	-3.26538e-05
-0.56793	-3.37982e-05	-0.56793	-3.2019e-05	-0.56793	-3.24829e-05
-0.56549	-3.36487e-05	-0.56549	-3.18542e-05	-0.56549	-3.23029e-05
-0.56305	-3.35114e-05	-0.56305	-3.17047e-05	-0.56305	-3.2132e-05
-0.56061	-3.3371e-05	-0.56061	-3.15491e-05	-0.56061	-3.1958e-05
-0.55817	-3.32336e-05	-0.55817	-3.13995e-05	-0.55817	-3.17902e-05
-0.55573	-3.30933e-05	-0.55573	-3.12439e-05	-0.55573	-3.16162e-05
-0.55328	-3.29559e-05	-0.55328	-3.11096e-05	-0.55328	-3.14484e-05
-0.55084	-3.28186e-05	-0.55084	-3.09601e-05	-0.55084	-3.12836e-05
-0.5484	-3.26874e-05	-0.5484	-3.08258e-05	-0.5484	-3.11249e-05
-0.54596	-3.2547e-05	-0.54596	-3.06854e-05	-0.54596	-3.09631e-05
-0.54352	-3.24219e-05	-0.54352	-3.05573e-05	-0.54352	-3.07983e-05
-0.54108	-3.22906e-05	-0.54108	-3.0426e-05	-0.54108	-3.06427e-05
-0.53864	-3.21655e-05	-0.53864	-3.02979e-05	-0.53864	-3.04779e-05
-0.53619	-3.20282e-05	-0.53619	-3.01727e-05	-0.53619	-3.03162e-05
-0.53375	-3.19092e-05	-0.53375	-3.00507e-05	-0.53375	-3.01666e-05
-0.53131	-3.17871e-05	-0.53131	-2.99194e-05	-0.53131	-2.99988e-05
-0.52887	-3.16895e-05	-0.52887	-2.98035e-05	-0.52887	-2.98523e-05
-0.52643	-3.15735e-05	-0.52643	-2.96753e-05	-0.52643	-2.96906e-05
-0.52399	-3.14484e-05	-0.52399	-2.95654e-05	-0.52399	-2.95471e-05
-0.52155	-3.13171e-05	-0.52155	-2.94403e-05	-0.52155	-2.93945e-05
-0.5191	-3.11951e-05	-0.5191	-2.93243e-05	-0.5191	-2.92419e-05
-0.51666	-3.10669e-05	-0.51666	-2.92053e-05	-0.51666	-2.90894e-05
-0.51422	-3.09479e-05	-0.51422	-2.90955e-05	-0.51422	-2.89459e-05
-0.51178	-3.08258e-05	-0.51178	-2.89825e-05	-0.51178	-2.87933e-05
-0.50934	-3.07068e-05	-0.50934	-2.88788e-05	-0.50934	-2.86469e-05
-0.5069	-3.05847e-05	-0.5069	-2.87659e-05	-0.5069	-2.85004e-05
-0.50446	-3.04626e-05	-0.50446	-2.86591e-05	-0.50446	-2.83539e-05
-0.50201	-3.03497e-05	-0.50201	-2.85553e-05	-0.50201	-2.82104e-05
-0.49957	-3.02277e-05	-0.49957	-2.84454e-05	-0.49957	-2.8067e-05
-0.49713	-3.01086e-05	-0.49713	-2.83386e-05	-0.49713	-2.79205e-05
-0.49469	-2.99988e-05	-0.49469	-2.82349e-05	-0.49469	-2.77771e-05
-0.49225	-2.9895e-05	-0.49225	-2.8125e-05	-0.49225	-2.76337e-05
-0.48981	-2.98157e-05	-0.48981	-2.80273e-05	-0.48981	-2.74902e-05
-0.48737	-2.9715e-05	-0.48737	-2.79236e-05	-0.48737	-2.73438e-05
-0.48492	-2.96082e-05	-0.48492	-2.78229e-05	-0.48492	-2.72095e-05
-0.48248	-2.95013e-05	-0.48248	-2.77222e-05	-0.48248	-2.7066e-05
-0.48004	-2.93884e-05	-0.48004	-2.76215e-05	-0.48004	-2.69226e-05
-0.4776	-2.92725e-05	-0.4776	-2.75208e-05	-0.4776	-2.67853e-05
-0.47516	-2.91595e-05	-0.47516	-2.74261e-05	-0.47516	-2.66541e-05
-0.47272	-2.90436e-05	-0.47272	-2.73224e-05	-0.47272	-2.65137e-05
-0.47028	-2.89307e-05	-0.47028	-2.72308e-05	-0.47028	-2.63855e-05
-0.46783	-2.88177e-05	-0.46783	-2.71301e-05	-0.46783	-2.62512e-05
-0.46539	-2.87048e-05	-0.46539	-2.70355e-05	-0.46539	-2.612e-05
-0.46295	-2.85919e-05	-0.46295	-2.69409e-05	-0.46295	-2.59796e-05
-0.46051	-2.8479e-05	-0.46051	-2.68433e-05	-0.46051	-2.58484e-05
-0.45807	-2.8363e-05	-0.45807	-2.67426e-05	-0.45807	-2.57172e-05
-0.45563	-2.82562e-05	-0.45563	-2.66541e-05	-0.45563	-2.55829e-05
-0.45319	-2.81403e-05	-0.45319	-2.65564e-05	-0.45319	-2.54425e-05
-0.45074	-2.80365e-05	-0.45074	-2.64648e-05	-0.45074	-2.53204e-05
-0.4483	-2.79266e-05	-0.4483	-2.63702e-05	-0.4483	-2.51801e-05
-0.44586	-2.78229e-05	-0.44586	-2.62756e-05	-0.44586	-2.50549e-05
-0.44342	-2.77161e-05	-0.44342	-2.61841e-05	-0.44342	-2.49176e-05
-0.44098	-2.76123e-05	-0.44098	-2.60895e-05	-0.44098	-2.47864e-05
-0.43854	-2.75055e-05	-0.43854	-2.59949e-05	-0.43854	-2.46521e-05
-0.4361	-2.74048e-05	-0.4361	-2.59064e-05	-0.4361	-2.4527e-05
-0.43365	-2.7298e-05	-0.43365	-2.58087e-05	-0.43365	-2.43896e-05
-0.43121	-2.71973e-05	-0.43121	-2.57263e-05	-0.43121	-2.42645e-05
-0.42877	-2.70905e-05	-0.42877	-2.56348e-05	-0.42877	-2.41333e-05
-0.42633	-2.69897e-05	-0.42633	-2.55493e-05	-0.42633	-2.40082e-05
-0.42389	-2.6886e-05	-0.42389	-2.54608e-05	-0.42389	-2.38739e-05
-0.42145	-2.67853e-05	-0.42145	-2.53693e-05	-0.42145	-2.37457e-05
-0.41901	-2.66785e-05	-0.41901	-2.52777e-05	-0.41901	-2.36145e-05
-0.41656	-2.65778e-05	-0.41656	-2.51953e-05	-0.41656	-2.34863e-05
-0.41412	-2.6474e-05	-0.41412	-2.51007e-05	-0.41412	-2.33521e-05
-0.41168	-2.63763e-05	-0.41168	-2.50153e-05	-0.41168	-2.32269e-05
-0.40924	-2.62695e-05	-0.40924	-2.49237e-05	-0.40924	-2.30865e-05
-0.4068	-2.61749e-05	-0.4068	-2.48383e-05	-0.4068	-2.29584e-05
-0.40436	-2.60773e-05	-0.40436	-2.47498e-05	-0.40436	-2.2821e-05
-0.40192	-2.59766e-05	-0.40192	-2.46643e-05	-0.40192	-2.26959e-05
-0.39948	-2.58759e-05	-0.39948	-2.45728e-05	-0.39948	-2.25525e-05
-0.39703	-2.57782e-05	-0.39703	-2.44873e-05	-0.39703	-2.24243e-05
-0.39459	-2.56836e-05	-0.39459	-2.43988e-05	-0.39459	-2.22809e-05
-0.39215	-2.55859e-05	-0.39215	-2.43103e-05	-0.39215	-2.21466e-05
-0.38971	-2.54913e-05	-0.38971	-2.42249e-05	-0.38971	-2.20093e-05
-0.38727	-2.53906e-05	-0.38727	-2.41394e-05	-0.38727	-2.18689e-05
-0.38483	-2.5296e-05	-0.38483	-2.4054e-05	-0.38483	-2.17255e-05
-0.38239	-2.51984e-05	-0.38239	-2.39685e-05	-0.38239	-2.1582e-05
-0.37994	-2.50977e-05	-0.37994	-2.3877e-05	-0.37994	-2.14325e-05
-0.3775	-2.50061e-05	-0.3775	-2.37946e-05	-0.3775	-2.12921e-05
-0.37506	-2.49084e-05	-0.37506	-2.37061e-05	-0.37506	-2.11365e-05
-0.37262	-2.48108e-05	-0.37262	-2.36206e-05	-0.37262	-2.0993e-05
-0.37018	-2.47131e-05	-0.37018	-2.35352e-05	-0.37018	-2.08313e-05
-0.36774	-2.46216e-05	-0.36774	-2.34558e-05	-0.36774	-2.06848e-05
-0.3653	-2.45239e-05	-0.3653	-2.33704e-05	-0.3653	-2.05261e-05
-0.36285	-2.44232e-05	-0.36285	-2.32849e-05	-0.36285	-2.03644e-05
-0.36041	-2.43286e-05	-0.36041	-2.31995e-05	-0.36041	-2.01935e-05
-0.35797	-2.42371e-05	-0.35797	-2.31171e-05	-0.35797	-2.00317e-05
-0.35553	-2.41364e-05	-0.35553	-2.30286e-05	-0.35553	-1.98517e-05
-0.35309	-2.40448e-05	-0.35309	-2.29462e-05	-0.35309	-1.96869e-05
-0.35065	-2.39502e-05	-0.35065	-2.28607e-05	-0.35065	-1.95038e-05
-0.34821	-2.38556e-05	-0.34821	-2.27753e-05	-0.34821	-1.93207e-05
-0.34576	-2.3761e-05	-0.34576	-2.26929e-05	-0.34576	-1.91315e-05
-0.34332	-2.36633e-05	-0.34332	-2.26074e-05	-0.34332	-1.89392e-05
-0.34088	-2.35687e-05	-0.34088	-2.2522e-05	-0.34088	-1.87347e-05
-0.33844	-2.34741e-05	-0.33844	-2.24365e-05	-0.33844	-1.85425e-05
-0.336	-2.33795e-05	-0.336	-2.23511e-05	-0.336	-1.83289e-05
-0.33356	-2.32849e-05	-0.33356	-2.22687e-05	-0.33356	-1.81274e-05
-0.33112	-2.31873e-05	-0.33112	-2.21802e-05	-0.33112	-1.79077e-05
-0.32867	-2.30957e-05	-0.32867	-2.21039e-05	-0.32867	-1.76941e-05
-0.32623	-2.30011e-05	-0.32623	-2.20184e-05	-0.32623	-1.74713e-05
-0.32379	-2.29065e-05	-0.32379	-2.1933e-05	-0.32379	-1.72455e-05
-0.32135	-2.28119e-05	-0.32135	-2.18445e-05	-0.32135	-1.70074e-05
-0.31891	-2.27173e-05	-0.31891	-2.17621e-05	-0.31891	-1.67816e-05
-0.31647	-2.26196e-05	-0.31647	-2.16736e-05	-0.31647	-1.65375e-05
-0.31403	-2.2525e-05	-0.31403	-2.15912e-05	-0.31403	-1.63086e-05
-0.31158	-2.24274e-05	-0.31158	-2.14996e-05	-0.31158	-1.60645e-05
-0.30914	-2.23328e-05	-0.30914	-2.14142e-05	-0.30914	-1.58295e-05
-0.3067	-2.22351e-05	-0.3067	-2.13287e-05	-0.3067	-1.55853e-05
-0.30426	-2.21405e-05	-0.30426	-2.12433e-05	-0.30426	-1.53381e-05
-0.30182	-2.20398e-05	-0.30182	-2.11517e-05	-0.30182	-1.50848e-05
-0.29938	-2.19482e-05	-0.29938	-2.10724e-05	-0.29938	-1.48468e-05
-0.29694	-2.18475e-05	-0.29694	-2.09839e-05	-0.29694	-1.45905e-05
-0.29449	-2.17529e-05	-0.29449	-2.08984e-05	-0.29449	-1.43463e-05
-0.29205	-2.16492e-05	-0.29205	-2.08069e-05	-0.29205	-1.409e-05
-0.28961	-2.15515e-05	-0.28961	-2.07214e-05	-0.28961	-1.38458e-05
-0.28717	-2.14508e-05	-0.28717	-2.06329e-05	-0.28717	-1.35925e-05
-0.28473	-2.1347e-05	-0.28473	-2.05414e-05	-0.28473	-1.33392e-05
-0.28229	-2.12433e-05	-0.28229	-2.04529e-05	-0.28229	-1.30768e-05
-0.27985	-2.11456e-05	-0.27985	-2.03644e-05	-0.27985	-1.28296e-05
-0.2774	-2.10419e-05	-0.2774	-2.02698e-05	-0.2774	-1.2561e-05
-0.27496	-2.09412e-05	-0.27496	-2.01874e-05	-0.27496	-1.23077e-05
-0.27252	-2.08344e-05	-0.27252	-2.00958e-05	-0.27252	-1.20483e-05
-0.27008	-2.07306e-05	-0.27008	-2.00073e-05	-0.27008	-1.17889e-05
-0.26764	-2.06268e-05	-0.26764	-1.99158e-05	-0.26764	-1.15234e-05
-0.2652	-2.0517e-05	-0.2652	-1.98212e-05	-0.2652	-1.12579e-05
-0.26276	-2.04071e-05	-0.26276	-1.97266e-05	-0.26276	-1.09833e-05
-0.26031	-2.03003e-05	-0.26031	-1.96411e-05	-0.26031	-1.07269e-05
-0.25787	-2.01843e-05	-0.25787	-1.95404e-05	-0.25787	-1.04492e-05
-0.25543	-2.00745e-05	-0.25543	-1.94519e-05	-0.25543	-1.01868e-05
-0.25299	-1.99554e-05	-0.25299	-1.93604e-05	-0.25299	-9.90601e-06
-0.25055	-1.98425e-05	-0.25055	-1.92963e-05	-0.25055	-9.64355e-06
-0.24811	-1.97235e-05	-0.24811	-1.92291e-05	-0.24811	-9.37195e-06
-0.24567	-1.96045e-05	-0.24567	-1.91467e-05	-0.24567	-9.09424e-06
-0.24323	-1.94733e-05	-0.24323	-1.90613e-05	-0.24323	-8.81042e-06
-0.24078	-1.93573e-05	-0.24078	-1.89789e-05	-0.24078	-8.54797e-06
-0.23834	-1.9223e-05	-0.23834	-1.88873e-05	-0.23834	-8.26721e-06
-0.2359	-1.90948e-05	-0.2359	-1.87988e-05	-0.2359	-8.00171e-06
-0.23346	-1.89575e-05	-0.23346	-1.86981e-05	-0.23346	-7.72705e-06
-0.23102	-1.88232e-05	-0.23102	-1.86035e-05	-0.23102	-7.45544e-06
-0.22858	-1.86768e-05	-0.22858	-1.84998e-05	-0.22858	-7.18689e-06
-0.22614	-1.85303e-05	-0.22614	-1.8396e-05	-0.22614	-6.91833e-06
-0.22369	-1.83777e-05	-0.22369	-1.82861e-05	-0.22369	-6.64368e-06
-0.22125	-1.82251e-05	-0.22125	-1.81854e-05	-0.22125	-6.38428e-06
-0.21881	-1.80573e-05	-0.21881	-1.80725e-05	-0.21881	-6.10962e-06
-0.21637	-1.78986e-05	-0.21637	-1.79688e-05	-0.21637	-5.85632e-06
-0.21393	-1.77216e-05	-0.21393	-1.78558e-05	-0.21393	-5.58777e-06
-0.21149	-1.75507e-05	-0.21149	-1.7749e-05	-0.21149	-5.34058e-06
-0.20905	-1.73615e-05	-0.20905	-1.76361e-05	-0.20905	-5.08423e-06
-0.2066	-1.71692e-05	-0.2066	-1.75201e-05	-0.2066	-4.83093e-06
-0.20416	-1.69586e-05	-0.20416	-1.74042e-05	-0.20416	-4.5816e-06
-0.20172	-1.67603e-05	-0.20172	-1.72913e-05	-0.20172	-4.33929e-06
-0.19928	-1.65375e-05	-0.19928	-1.71692e-05	-0.19928	-4.09393e-06
-0.19684	-1.63239e-05	-0.19684	-1.70593e-05	-0.19684	-3.86139e-06
-0.1944	-1.60858e-05	-0.1944	-1.69342e-05	-0.1944	-3.62457e-06
-0.19196	-1.58478e-05	-0.19196	-1.68152e-05	-0.19196	-3.39752e-06
-0.18951	-1.55945e-05	-0.18951	-1.6687e-05	-0.18951	-3.17078e-06
-0.18707	-1.5332e-05	-0.18707	-1.65558e-05	-0.18707	-2.94617e-06
-0.18463	-1.50513e-05	-0.18463	-1.64215e-05	-0.18463	-2.72186e-06
-0.18219	-1.47797e-05	-0.18219	-1.62994e-05	-0.18219	-2.52014e-06
-0.17975	-1.44714e-05	-0.17975	-1.6153e-05	-0.17975	-2.30591e-06
-0.17731	-1.41846e-05	-0.17731	-1.60217e-05	-0.17731	-2.1048e-06
-0.17487	-1.3855e-05	-0.17487	-1.58691e-05	-0.17487	-1.89667e-06
-0.17242	-1.35406e-05	-0.17242	-1.57288e-05	-0.17242	-1.71173e-06
-0.16998	-1.32019e-05	-0.16998	-1.55762e-05	-0.16998	-1.51794e-06
-0.16754	-1.2851e-05	-0.16754	-1.54205e-05	-0.16754	-1.33209e-06
-0.1651	-1.24756e-05	-0.1651	-1.52496e-05	-0.1651	-1.138e-06
-0.16266	-1.21185e-05	-0.16266	-1.5094e-05	-0.16266	-9.61609e-07
-0.16022	-1.17218e-05	-0.16022	-1.49139e-05	-0.16022	-7.80334e-07
-0.15778	-1.13464e-05	-0.15778	-1.47491e-05	-0.15778	-6.13098e-07
-0.15533	-1.09375e-05	-0.15533	-1.4563e-05	-0.15533	-4.28467e-07
-0.15289	-1.05316e-05	-0.15289	-1.43799e-05	-0.15289	-2.58179e-07
-0.15045	-1.01074e-05	-0.15045	-1.41876e-05	-0.15045	-7.71179e-08
-0.14801	-9.67407e-06	-0.14801	-1.39862e-05	-0.14801	1.06598e-07
-0.14557	-9.22546e-06	-0.14557	-1.37695e-05	-0.14557	2.98767e-07
-0.14313	-8.79822e-06	-0.14313	-1.35681e-05	-0.14313	4.84314e-07
-0.14069	-8.3374e-06	-0.14069	-1.33362e-05	-0.14069	6.88721e-07
-0.13824	-7.901e-06	-0.13824	-1.31226e-05	-0.13824	8.82874e-07
-0.1358	-7.42798e-06	-0.1358	-1.28754e-05	-0.1358	1.10291e-06
-0.13336	-6.98853e-06	-0.13336	-1.26434e-05	-0.13336	1.31104e-06
-0.13092	-6.53076e-06	-0.13092	-1.23901e-05	-0.13092	1.54633e-06
-0.12848	-6.07605e-06	-0.12848	-1.21246e-05	-0.12848	1.7804e-06
-0.12604	-5.61218e-06	-0.12604	-1.18439e-05	-0.12604	2.0343e-06
-0.1236	-5.17883e-06	-0.1236	-1.15784e-05	-0.1236	2.28333e-06
-0.12115	-4.72717e-06	-0.12115	-1.12762e-05	-0.12115	2.55951e-06
-0.11871	-4.31244e-06	-0.11871	-1.09894e-05	-0.11871	2.8299e-06
-0.11627	-3.87604e-06	-0.11627	-1.06659e-05	-0.11627	3.13171e-06
-0.11383	-3.47351e-06	-0.11383	-1.03577e-05	-0.11383	3.43262e-06
-0.11139	-3.0722e-06	-0.11139	-1.00281e-05	-0.11139	3.75061e-06
-0.10895	-2.68951e-06	-0.10895	-9.68933e-06	-0.10895	4.07867e-06
-0.10651	-2.30743e-06	-0.10651	-9.32617e-06	-0.10651	4.43481e-06
-0.10406	-1.96808e-06	-0.10406	-8.98132e-06	-0.10406	4.78027e-06
-0.10162	-1.62994e-06	-0.10162	-8.59375e-06	-0.10162	5.17181e-06
-0.09918	-1.32202e-06	-0.09918	-8.23364e-06	-0.09918	5.55023e-06
-0.09674	-1.01471e-06	-0.09674	-7.82471e-06	-0.09674	5.96985e-06
-0.0943	-7.41577e-07	-0.0943	-7.44019e-06	-0.0943	6.37421e-06
-0.09186	-4.73938e-07	-0.09186	-7.0282e-06	-0.09186	6.82068e-06
-0.08942	-2.20032e-07	-0.08942	-6.60706e-06	-0.08942	7.27539e-06
-0.08698	3.85437e-08	-0.08698	-6.1615e-06	-0.08698	7.76367e-06
-0.08453	2.70081e-07	-0.08453	-5.74341e-06	-0.08453	8.2489e-06
-0.08209	5.18799e-07	-0.08209	-5.27954e-06	-0.08209	8.78906e-06
-0.07965	7.50427e-07	-0.07965	-4.84314e-06	-0.07965	9.31396e-06
-0.07721	1.00189e-06	-0.07721	-4.3808e-06	-0.07721	9.89075e-06
-0.07477	1.24847e-06	-0.07477	-3.91724e-06	-0.07477	1.04675e-05
-0.07233	1.51794e-06	-0.07233	-3.44116e-06	-0.07233	1.1087e-05
-0.06989	1.80725e-06	-0.06989	-2.95563e-06	-0.06989	1.17218e-05
-0.06744	2.11914e-06	-0.06744	-2.44751e-06	-0.06744	1.24054e-05
-0.065	2.43164e-06	-0.065	-1.97083e-06	-0.065	1.30798e-05
-0.06256	2.79816e-06	-0.06256	-1.4563e-06	-0.06256	1.38245e-05
-0.06012	3.1662e-06	-0.06012	-9.68323e-07	-0.06012	1.45569e-05
-0.05768	3.59528e-06	-0.05768	-4.40369e-07	-0.05768	1.53656e-05
-0.05524	4.0329e-06	-0.05524	5.71899e-08	-0.05524	1.61743e-05
-0.0528	4.52118e-06	-0.0528	5.83191e-07	-0.0528	1.7041e-05
-0.05035	5.05737e-06	-0.05035	1.11481e-06	-0.05035	1.79443e-05
-0.04791	5.65308e-06	-0.04791	1.66595e-06	-0.04791	1.89117e-05
-0.04547	6.26465e-06	-0.04547	2.19238e-06	-0.04547	1.987e-05
-0.04303	6.96106e-06	-0.04303	2.76825e-06	-0.04303	2.0929e-05
-0.04059	7.67212e-06	-0.04059	3.31635e-06	-0.04059	2.19666e-05
-0.03815	8.45642e-06	-0.03815	3.90594e-06	-0.03815	2.31049e-05
-0.03571	9.27429e-06	-0.03571	4.49799e-06	-0.03571	2.42462e-05
-0.03326	1.01471e-05	-0.03326	5.11475e-06	-0.03326	2.54547e-05
-0.03082	1.10718e-05	-0.03082	5.75256e-06	-0.03082	2.6712e-05
-0.02838	1.20758e-05	-0.02838	6.43768e-06	-0.02838	2.80426e-05
-0.02594	1.30829e-05	-0.02594	7.09839e-06	-0.02594	2.93488e-05
-0.0235	1.41968e-05	-0.0235	7.83997e-06	-0.0235	3.0777e-05
-0.02106	1.53076e-05	-0.02106	8.55408e-06	-0.02106	3.21777e-05
-0.01862	1.65375e-05	-0.01862	9.34753e-06	-0.01862	3.36792e-05
-0.01617	1.77582e-05	-0.01617	1.01196e-05	-0.01617	3.51715e-05
-0.01373	1.90704e-05	-0.01373	1.09467e-05	-0.01373	3.6731e-05
-0.01129	2.04407e-05	-0.01129	1.18042e-05	-0.01129	3.83362e-05
-0.00885	2.18994e-05	-0.00885	1.27167e-05	-0.00885	4.00208e-05
-0.00641	2.33398e-05	-0.00641	1.35986e-05	-0.00641	4.16534e-05
-0.00397	2.49115e-05	-0.00397	1.45721e-05	-0.00397	4.34296e-05
-0.00153	2.64343e-05	-0.00153	1.5509e-05	-0.00153	4.51172e-05
0.000915527	2.80792e-05	0.000915527	1.65283e-05	0.000915527	4.6933e-05
0.00336	2.97028e-05	0.00336	1.75293e-05	0.00336	4.87152e-05
0.0058	3.13995e-05	0.0058	1.85669e-05	0.0058	5.05524e-05
0.00824	3.31177e-05	0.00824	1.96289e-05	0.00824	5.24017e-05
0.01068	3.49213e-05	0.01068	2.07458e-05	0.01068	5.43304e-05
0.01312	3.66394e-05	0.01312	2.18079e-05	0.01312	5.61584e-05
0.01556	3.84735e-05	0.01556	2.29584e-05	0.01556	5.81146e-05
0.01801	4.02161e-05	0.01801	2.40509e-05	0.01801	5.99335e-05
0.02045	4.20776e-05	0.02045	2.52228e-05	0.02045	6.18988e-05
0.02289	4.38354e-05	0.02289	2.63275e-05	0.02289	6.36292e-05
0.02533	4.56451e-05	0.02533	2.74811e-05	0.02533	6.55212e-05
0.02777	4.74487e-05	0.02777	2.86377e-05	0.02777	6.73828e-05
0.03021	4.93042e-05	0.03021	2.98523e-05	0.03021	6.93359e-05
0.03265	5.1004e-05	0.03265	3.09662e-05	0.03265	7.10754e-05
0.0351	5.28259e-05	0.0351	3.21716e-05	0.0351	7.29675e-05
0.03754	5.448e-05	0.03754	3.32764e-05	0.03754	7.46765e-05
0.03998	5.61646e-05	0.03998	3.44238e-05	0.03998	7.63855e-05
0.04242	5.7782e-05	0.04242	3.55408e-05	0.04242	7.8064e-05
0.04486	5.93781e-05	0.04486	3.66669e-05	0.04486	7.97119e-05
0.0473	6.091e-05	0.0473	3.77686e-05	0.0473	8.13293e-05
0.04974	6.23169e-05	0.04974	3.89069e-05	0.04974	8.29773e-05
0.05219	6.36292e-05	0.05219	3.99445e-05	0.05219	8.43811e-05
0.05463	6.5033e-05	0.05463	4.10736e-05	0.05463	8.58765e-05
0.05707	6.61621e-05	0.05707	4.19922e-05	0.05707	8.71277e-05
0.05951	6.73828e-05	0.05951	4.28802e-05	0.05951	8.8501e-05
0.06195	6.83594e-05	0.06195	4.36218e-05	0.06195	8.96606e-05
0.06439	6.93359e-05	0.06439	4.43939e-05	0.06439	9.08203e-05
0.06683	7.02209e-05	0.06683	4.51416e-05	0.06683	9.18884e-05
0.06927	7.1106e-05	0.06927	4.59106e-05	0.06927	9.29565e-05
0.07172	7.18079e-05	0.07172	4.65668e-05	0.07172	9.37805e-05
0.07416	7.26318e-05	0.07416	4.729e-05	0.07416	9.47266e-05
0.0766	7.32727e-05	0.0766	4.78821e-05	0.0766	9.53979e-05
0.07904	7.40356e-05	0.07904	4.85535e-05	0.07904	9.61609e-05
0.08148	7.4646e-05	0.08148	4.91028e-05	0.08148	9.67102e-05
0.08392	7.52563e-05	0.08392	4.9649e-05	0.08392	9.7229e-05
0.08636	7.58057e-05	0.08636	5.01709e-05	0.08636	9.76257e-05
0.08881	7.63855e-05	0.08881	5.07019e-05	0.08881	9.80225e-05
0.09125	7.67212e-05	0.09125	5.10956e-05	0.09125	9.8175e-05
0.09369	7.71179e-05	0.09369	5.15625e-05	0.09369	9.84192e-05
0.09613	7.72705e-05	0.09613	5.19012e-05	0.09613	9.83887e-05
0.09857	7.73926e-05	0.09857	5.23193e-05	0.09857	9.85413e-05
0.10101	7.7301e-05	0.10101	5.26184e-05	0.10101	9.85107e-05
0.10345	7.7179e-05	0.10345	5.29419e-05	0.10345	9.86023e-05
0.1059	7.69653e-05	0.1059	5.3244e-05	0.1059	9.86938e-05
0.10834	7.67517e-05	0.10834	5.35675e-05	0.10834	9.8877e-05
0.11078	7.63855e-05	0.11078	5.37781e-05	0.11078	9.89685e-05
0.11322	7.62329e-05	0.11322	5.4071e-05	0.11322	9.92432e-05
0.11566	7.61108e-05	0.11566	5.42419e-05	0.11566	9.94263e-05
0.1181	7.62634e-05	0.1181	5.44739e-05	0.1181	9.9762e-05
0.12054	7.66296e-05	0.12054	5.46448e-05	0.12054	0.000100037
0.12299	7.724e-05	0.12299	5.48218e-05	0.12299	0.000100372
0.12543	7.80945e-05	0.12543	5.49774e-05	0.12543	0.0001008
0.12787	7.91321e-05	0.12787	5.51605e-05	0.12787	0.000101318
0.13031	8.01392e-05	0.13031	5.52429e-05	0.13031	0.000101654
0.13275	8.13599e-05	0.13275	5.54077e-05	0.13275	0.000102142
0.13519	8.2428e-05	0.13519	5.5481e-05	0.13519	0.000102478
0.13763	8.35876e-05	0.13763	5.56366e-05	0.13763	0.000102966
0.14008	8.45947e-05	0.14008	5.5719e-05	0.14008	0.000103333
0.14252	8.55408e-05	0.14252	5.58624e-05	0.14252	0.000103729
0.14496	8.63953e-05	0.14496	5.60089e-05	0.14496	0.000104126
0.1474	8.71887e-05	0.1474	5.61981e-05	0.1474	0.000104492
0.14984	8.77991e-05	0.14984	5.63446e-05	0.14984	0.000104645
0.15228	8.83789e-05	0.15228	5.65796e-05	0.15228	0.000104889
0.15472	8.87146e-05	0.15472	5.67383e-05	0.15472	0.000104919
0.15717	8.90503e-05	0.15717	5.6955e-05	0.15717	0.000105011
0.15961	8.92029e-05	0.15961	5.71442e-05	0.15961	0.00010498
0.16205	8.9325e-05	0.16205	5.73456e-05	0.16205	0.00010495
0.16449	8.9325e-05	0.16449	5.75165e-05	0.16449	0.000104828
0.16693	8.92944e-05	0.16693	5.77057e-05	0.16693	0.000104736
0.16937	8.90808e-05	0.16937	5.77911e-05	0.16937	0.000104492
0.17181	8.88977e-05	0.17181	5.79376e-05	0.17181	0.000104279
0.17426	8.8562e-05	0.17426	5.79956e-05	0.17426	0.000103912
0.1767	8.82568e-05	0.1767	5.80872e-05	0.1767	0.000103668
0.17914	8.77991e-05	0.17914	5.81116e-05	0.17914	0.00010321
0.18158	8.73413e-05	0.18158	5.81421e-05	0.18158	0.000102814
0.18402	8.6853e-05	0.18402	5.81696e-05	0.18402	0.000102386
0.18646	8.63647e-05	0.18646	5.81848e-05	0.18646	0.00010199
0.1889	8.57849e-05	0.1889	5.81329e-05	0.1889	0.00010144
0.19135	8.52356e-05	0.19135	5.81207e-05	0.19135	0.000100952
0.19379	8.45947e-05	0.19379	5.80414e-05	0.19379	0.000100342
0.19623	8.39844e-05	0.19623	5.79926e-05	0.19623	9.97925e-05
0.19867	8.33435e-05	0.19867	5.79193e-05	0.19867	9.92126e-05
0.20111	8.27026e-05	0.20111	5.78705e-05	0.20111	9.85718e-05
0.20355	8.20313e-05	0.20355	5.78278e-05	0.20355	9.79309e-05
0.20599	8.13904e-05	0.20599	5.78064e-05	0.20599	9.729e-05
0.20844	8.06885e-05	0.20844	5.77393e-05	0.20844	9.65881e-05
0.21088	8.00476e-05	0.21088	5.77271e-05	0.21088	9.59167e-05
0.21332	7.93762e-05	0.21332	5.76508e-05	0.21332	9.51843e-05
0.21576	7.87354e-05	0.21576	5.76141e-05	0.21576	9.45129e-05
0.2182	7.8064e-05	0.2182	5.755e-05	0.2182	9.37805e-05
0.22064	7.74231e-05	0.22064	5.7489e-05	0.22064	9.30786e-05
0.22308	7.67517e-05	0.22308	5.74127e-05	0.22308	9.23767e-05
0.22552	7.61414e-05	0.22552	5.73639e-05	0.22552	9.17053e-05
0.22797	7.547e-05	0.22797	5.72845e-05	0.22797	9.09729e-05
0.23041	7.48291e-05	0.23041	5.72357e-05	0.23041	9.0271e-05
0.23285	7.41882e-05	0.23285	5.71411e-05	0.23285	8.95691e-05
0.23529	7.35474e-05	0.23529	5.70831e-05	0.23529	8.88672e-05
0.23773	7.2937e-05	0.23773	5.69733e-05	0.23773	8.81653e-05
0.24017	7.23267e-05	0.24017	5.68512e-05	0.24017	8.74634e-05
0.24261	7.17163e-05	0.24261	5.6723e-05	0.24261	8.6792e-05
0.24506	7.11365e-05	0.24506	5.6604e-05	0.24506	8.61206e-05
0.2475	7.05261e-05	0.2475	5.64209e-05	0.2475	8.54492e-05
0.24994	6.99463e-05	0.24994	5.625e-05	0.24994	8.48083e-05
0.25238	6.93665e-05	0.25238	5.60394e-05	0.25238	8.4137e-05
0.25482	6.88171e-05	0.25482	5.58472e-05	0.25482	8.34656e-05
0.25726	6.82068e-05	0.25726	5.56244e-05	0.25726	8.27942e-05
0.2597	6.76575e-05	0.2597	5.53833e-05	0.2597	8.21533e-05
0.26215	6.71082e-05	0.26215	5.5127e-05	0.26215	8.15125e-05
0.26459	6.65894e-05	0.26459	5.48889e-05	0.26459	8.08716e-05
0.26703	6.604e-05	0.26703	5.46173e-05	0.26703	8.01697e-05
0.26947	6.55212e-05	0.26947	5.43457e-05	0.26947	7.95593e-05
0.27191	6.50024e-05	0.27191	5.40375e-05	0.27191	7.88879e-05
0.27435	6.45142e-05	0.27435	5.37415e-05	0.27435	7.82776e-05
0.27679	6.40259e-05	0.27679	5.34424e-05	0.27679	7.76367e-05
0.27924	6.35681e-05	0.27924	5.31372e-05	0.27924	7.69958e-05
0.28168	6.30798e-05	0.28168	5.28442e-05	0.28168	7.6416e-05
0.28412	6.26526e-05	0.28412	5.25543e-05	0.28412	7.58057e-05
0.28656	6.21948e-05	0.28656	5.22308e-05	0.28656	7.51953e-05
0.289	6.17676e-05	0.289	5.1944e-05	0.289	7.4646e-05
0.29144	6.13403e-05	0.29144	5.16479e-05	0.29144	7.40662e-05
0.29388	6.09131e-05	0.29388	5.13916e-05	0.29388	7.35474e-05
0.29633	6.05164e-05	0.29633	5.1123e-05	0.29633	7.2998e-05
0.29877	6.01196e-05	0.29877	5.0885e-05	0.29877	7.24792e-05
0.30121	5.97229e-05	0.30121	5.06622e-05	0.30121	7.19604e-05
0.30365	5.93567e-05	0.30365	5.0473e-05	0.30365	7.14722e-05
0.30609	5.89905e-05	0.30609	5.02716e-05	0.30609	7.09839e-05
0.30853	5.86243e-05	0.30853	5.01251e-05	0.30853	7.05566e-05
0.31097	5.82886e-05	0.31097	4.99725e-05	0.31097	7.01599e-05
0.31342	5.79529e-05	0.31342	4.98505e-05	0.31342	6.97327e-05
0.31586	5.76172e-05	0.31586	4.97131e-05	0.31586	6.93054e-05
0.3183	5.72815e-05	0.3183	4.95911e-05	0.3183	6.89087e-05
0.32074	5.69458e-05	0.32074	4.94812e-05	0.32074	6.85425e-05
0.32318	5.66406e-05	0.32318	4.9408e-05	0.32318	6.81152e-05
0.32562	5.63049e-05	0.32562	4.93225e-05	0.32562	6.77185e-05
0.32806	5.59998e-05	0.32806	4.92859e-05	0.32806	6.73523e-05
0.33051	5.56946e-05	0.33051	4.92249e-05	0.33051	6.69861e-05
0.33295	5.53894e-05	0.33295	4.91974e-05	0.33295	6.66199e-05
0.33539	5.50842e-05	0.33539	4.91608e-05	0.33539	6.62842e-05
0.33783	5.48096e-05	0.33783	4.91516e-05	0.33783	6.5918e-05
0.34027	5.45349e-05	0.34027	4.91516e-05	0.34027	6.55823e-05
0.34271	5.42603e-05	0.34271	4.91669e-05	0.34271	6.52466e-05
0.34515	5.39856e-05	0.34515	4.9176e-05	0.34515	6.49109e-05
0.3476	5.37109e-05	0.3476	4.92065e-05	0.3476	6.46057e-05
0.35004	5.34363e-05	0.35004	4.92188e-05	0.35004	6.43005e-05
0.35248	5.31616e-05	0.35248	4.92493e-05	0.35248	6.40259e-05
0.35492	5.29175e-05	0.35492	4.92798e-05	0.35492	6.37207e-05
0.35736	5.26733e-05	0.35736	4.93134e-05	0.35736	6.34155e-05
0.3598	5.23987e-05	0.3598	4.935e-05	0.3598	6.31409e-05
0.36224	5.21545e-05	0.36224	4.9408e-05	0.36224	6.28662e-05
0.36469	5.19104e-05	0.36469	4.94476e-05	0.36469	6.25916e-05
0.36713	5.16968e-05	0.36713	4.9527e-05	0.36713	6.23474e-05
0.36957	5.14526e-05	0.36957	4.95941e-05	0.36957	6.20728e-05
0.37201	5.12085e-05	0.37201	4.96826e-05	0.37201	6.18286e-05
0.37445	5.09949e-05	0.37445	4.97437e-05	0.37445	6.15845e-05
0.37689	5.07507e-05	0.37689	4.98138e-05	0.37689	6.13708e-05
0.37933	5.05371e-05	0.37933	4.9884e-05	0.37933	6.11267e-05
0.38177	5.03235e-05	0.38177	4.99664e-05	0.38177	6.09131e-05
0.38422	5.01099e-05	0.38422	5.00336e-05	0.38422	6.06384e-05
0.38666	4.99268e-05	0.38666	5.01068e-05	0.38666	6.03943e-05
0.3891	4.97131e-05	0.3891	5.01709e-05	0.3891	6.01807e-05
0.39154	4.953e-05	0.39154	5.02472e-05	0.39154	5.99365e-05
0.39398	4.93591e-05	0.39398	5.03174e-05	0.39398	5.96924e-05
0.39642	4.91608e-05	0.39642	5.03876e-05	0.39642	5.94482e-05
0.39886	4.90509e-05	0.39886	5.04578e-05	0.39886	5.92346e-05
0.40131	4.88708e-05	0.40131	5.05341e-05	0.40131	5.9021e-05
0.40375	4.86816e-05	0.40375	5.0589e-05	0.40375	5.88074e-05
0.40619	4.85016e-05	0.40619	5.065e-05	0.40619	5.85938e-05
0.40863	4.83246e-05	0.40863	5.0705e-05	0.40863	5.83801e-05
0.41107	4.81445e-05	0.41107	5.07721e-05	0.41107	5.8197e-05
0.41351	4.79675e-05	0.41351	5.08301e-05	0.41351	5.80139e-05
0.41595	4.77966e-05	0.41595	5.08911e-05	0.41595	5.77698e-05
0.4184	4.76318e-05	0.4184	5.09521e-05	0.4184	5.75562e-05
0.42084	4.74731e-05	0.42084	5.10254e-05	0.42084	5.7373e-05
0.42328	4.73053e-05	0.42328	5.10803e-05	0.42328	5.71594e-05
0.42572	4.71497e-05	0.42572	5.11475e-05	0.42572	5.69763e-05
0.42816	4.69849e-05	0.42816	5.11963e-05	0.42816	5.67627e-05
0.4306	4.68323e-05	0.4306	5.12543e-05	0.4306	5.65796e-05
0.43304	4.66827e-05	0.43304	5.1297e-05	0.43304	5.63965e-05
0.43549	4.65302e-05	0.43549	5.13397e-05	0.43549	5.62134e-05
0.43793	4.63837e-05	0.43793	5.13855e-05	0.43793	5.60303e-05
0.44037	4.62402e-05	0.44037	5.14343e-05	0.44037	5.58472e-05
0.44281	4.60999e-05	0.44281	5.14679e-05	0.44281	5.56641e-05
0.44525	4.59686e-05	0.44525	5.15076e-05	0.44525	5.55115e-05
0.44769	4.58344e-05	0.44769	5.15381e-05	0.44769	5.53284e-05
0.45013	4.5697e-05	0.45013	5.15747e-05	0.45013	5.51453e-05
0.45258	4.55627e-05	0.45258	5.16083e-05	0.45258	5.49622e-05
0.45502	4.54315e-05	0.45502	5.16479e-05	0.45502	5.48096e-05
0.45746	4.52972e-05	0.45746	5.16937e-05	0.45746	5.4657e-05
0.4599	4.5166e-05	0.4599	5.17334e-05	0.4599	5.44739e-05
0.46234	4.50348e-05	0.46234	5.17609e-05	0.46234	5.43213e-05
0.46478	4.49097e-05	0.46478	5.17975e-05	0.46478	5.41687e-05
0.46722	4.47815e-05	0.46722	5.18219e-05	0.46722	5.39856e-05
0.46967	4.46655e-05	0.46967	5.18494e-05	0.46967	5.3833e-05
0.47211	4.45496e-05	0.47211	5.18799e-05	0.47211	5.36499e-05
0.47455	4.44336e-05	0.47455	5.19104e-05	0.47455	5.34973e-05
0.47699	4.43207e-05	0.47699	5.1944e-05	0.47699	5.33447e-05
0.47943	4.42108e-05	0.47943	5.19836e-05	0.47943	5.32227e-05
0.48187	4.4101e-05	0.48187	5.2002e-05	0.48187	5.30701e-05
0.48431	4.39911e-05	0.48431	5.20233e-05	0.48431	5.2948e-05
0.48676	4.38812e-05	0.48676	5.20416e-05	0.48676	5.27954e-05
0.4892	4.37775e-05	0.4892	5.20691e-05	0.4892	5.26733e-05
0.49164	4.36676e-05	0.49164	5.20844e-05	0.49164	5.25208e-05
0.49408	4.35608e-05	0.49408	5.21057e-05	0.49408	5.23987e-05
0.49652	4.34601e-05	0.49652	5.21301e-05	0.49652	5.23071e-05
0.49896	4.33594e-05	0.49896	5.21576e-05	0.49896	5.21851e-05
0.5014	4.32587e-05	0.5014	5.21667e-05	0.5014	5.2063e-05
0.50385	4.3161e-05	0.50385	5.21881e-05	0.50385	5.19409e-05
0.50629	4.30603e-05	0.50629	5.21973e-05	0.50629	5.18188e-05
0.50873	4.29688e-05	0.50873	5.22217e-05	0.50873	5.16968e-05
0.51117	4.28711e-05	0.51117	5.22308e-05	0.51117	5.16052e-05
0.51361	4.27795e-05	0.51361	5.22491e-05	0.51361	5.14832e-05
0.51605	4.2691e-05	0.51605	5.22614e-05	0.51605	5.13916e-05
0.51849	4.26056e-05	0.51849	5.22827e-05	0.51849	5.12695e-05
0.52094	4.25171e-05	0.52094	5.2298e-05	0.52094	5.11475e-05
0.52338	4.24377e-05	0.52338	5.23193e-05	0.52338	5.10559e-05
0.52582	4.23492e-05	0.52582	5.23315e-05	0.52582	5.09338e-05
0.52826	4.22638e-05	0.52826	5.23499e-05	0.52826	5.08423e-05
0.5307	4.21753e-05	0.5307	5.2359e-05	0.5307	5.07202e-05
0.53314	4.20898e-05	0.53314	5.23712e-05	0.53314	5.05981e-05
0.53558	4.20074e-05	0.53558	5.23865e-05	0.53558	5.05066e-05
0.53802	4.19281e-05	0.53802	5.24139e-05	0.53802	5.03845e-05
0.54047	4.18457e-05	0.54047	5.24261e-05	0.54047	5.02625e-05
0.54291	4.17633e-05	0.54291	5.24475e-05	0.54291	5.01709e-05
0.54535	4.16809e-05	0.54535	5.24567e-05	0.54535	5.00488e-05
0.54779	4.16046e-05	0.54779	5.24658e-05	0.54779	4.99268e-05
0.55023	4.15283e-05	0.55023	5.2475e-05	0.55023	4.98352e-05
0.55267	4.14551e-05	0.55267	5.24811e-05	0.55267	4.97437e-05
0.55511	4.13849e-05	0.55511	5.24841e-05	0.55511	4.96521e-05
0.55756	4.13116e-05	0.55756	5.24872e-05	0.55756	4.953e-05
0.56	4.12384e-05	0.56	5.24933e-05	0.56	4.95667e-05
0.56244	4.11713e-05	0.56244	5.25055e-05	0.56244	4.94659e-05
0.56488	4.11011e-05	0.56488	5.25085e-05	0.56488	4.93744e-05
0.56732	4.10339e-05	0.56732	5.25208e-05	0.56732	4.9295e-05
0.56976	4.09637e-05	0.56976	5.25269e-05	0.56976	4.92035e-05
0.5722	4.08966e-05	0.5722	5.25421e-05	0.5722	4.91241e-05
0.57465	4.08295e-05	0.57465	5.25574e-05	0.57465	4.9054e-05
0.57709	4.07684e-05	0.57709	5.25818e-05	0.57709	4.89685e-05
0.57953	4.07043e-05	0.57953	5.2594e-05	0.57953	4.88953e-05
0.58197	4.06433e-05	0.58197	5.26123e-05	0.58197	4.88312e-05
0.58441	4.05731e-05	0.58441	5.26215e-05	0.58441	4.8764e-05
0.58685	4.05121e-05	0.58685	5.26337e-05	0.58685	4.8703e-05
0.58929	4.04602e-05	0.58929	5.26459e-05	0.58929	4.8645e-05
0.59174	4.04022e-05	0.59174	5.26611e-05	0.59174	4.85779e-05
0.59418	4.03442e-05	0.59418	5.26764e-05	0.59418	4.85107e-05
0.59662	4.02863e-05	0.59662	5.26947e-05	0.59662	4.84406e-05
0.59906	4.02283e-05	0.59906	5.271e-05	0.59906	4.83948e-05
0.6015	4.01703e-05	0.6015	5.27344e-05	0.6015	4.83521e-05
0.60394	4.01093e-05	0.60394	5.27557e-05	0.60394	4.82971e-05
0.60638	4.00574e-05	0.60638	5.27863e-05	0.60638	4.82544e-05
0.60883	4.00024e-05	0.60883	5.28137e-05	0.60883	4.82147e-05
0.61127	3.99475e-05	0.61127	5.28473e-05	0.61127	4.81812e-05
0.61371	3.98987e-05	0.61371	5.28809e-05	0.61371	4.81598e-05
0.61615	3.9856e-05	0.61615	5.29205e-05	0.61615	4.81445e-05
0.61859	3.98102e-05	0.61859	5.29572e-05	0.61859	4.81232e-05
0.62103	3.97705e-05	0.62103	5.30029e-05	0.62103	4.81262e-05
0.62347	3.97247e-05	0.62347	5.30457e-05	0.62347	4.81293e-05
0.62592	3.96881e-05	0.62592	5.31036e-05	0.62592	4.81476e-05
0.62836	3.96515e-05	0.62836	5.31647e-05	0.62836	4.81689e-05
0.6308	3.96179e-05	0.6308	5.32318e-05	0.6308	4.81812e-05
0.63324	3.95905e-05	0.63324	5.33081e-05	0.63324	4.82086e-05
0.63568	3.9566e-05	0.63568	5.33936e-05	0.63568	4.82422e-05
0.63812	3.95416e-05	0.63812	5.3476e-05	0.63812	4.8291e-05
0.64056	3.95264e-05	0.64056	5.35767e-05	0.64056	4.83459e-05
0.64301	3.95081e-05	0.64301	5.36835e-05	0.64301	4.841e-05
0.64545	3.9505e-05	0.64545	5.38055e-05	0.64545	4.84924e-05
0.64789	3.94989e-05	0.64789	5.39246e-05	0.64789	4.85779e-05
0.65033	3.9505e-05	0.65033	5.40558e-05	0.65033	4.86816e-05
0.65277	3.95203e-05	0.65277	5.41992e-05	0.65277	4.88007e-05
0.65521	3.95477e-05	0.65521	5.4361e-05	0.65521	4.89349e-05
0.65765	3.95752e-05	0.65765	5.45166e-05	0.65765	4.90784e-05
0.6601	3.96179e-05	0.6601	5.4715e-05	0.6601	4.92767e-05
0.66254	3.96576e-05	0.66254	5.49133e-05	0.66254	4.94629e-05
0.66498	3.97156e-05	0.66498	5.51361e-05	0.66498	4.96582e-05
0.66742	3.97797e-05	0.66742	5.53802e-05	0.66742	4.98901e-05
0.66986	3.9856e-05	0.66986	5.56396e-05	0.66986	5.01465e-05
0.6723	3.99445e-05	0.6723	5.59204e-05	0.6723	5.04303e-05
0.67474	4.00482e-05	0.67474	5.62317e-05	0.67474	5.07568e-05
0.67719	4.0152e-05	0.67719	5.6546e-05	0.67719	5.10834e-05
0.67963	4.02832e-05	0.67963	5.69061e-05	0.67963	5.1474e-05
0.68207	4.04175e-05	0.68207	5.72662e-05	0.68207	5.18829e-05
0.68451	4.05823e-05	0.68451	5.76752e-05	0.68451	5.23346e-05
0.68695	4.07562e-05	0.68695	5.80963e-05	0.68695	5.28137e-05
0.68939	4.09454e-05	0.68939	5.85602e-05	0.68939	5.33417e-05
0.69183	4.1153e-05	0.69183	5.90607e-05	0.69183	5.39215e-05
0.69427	4.13757e-05	0.69427	5.96161e-05	0.69427	5.45502e-05
0.69672	4.16077e-05	0.69672	6.01898e-05	0.69672	5.51941e-05
0.69916	4.18762e-05	0.69916	6.06995e-05	0.69916	5.59265e-05
0.7016	4.21356e-05	0.7016	6.13708e-05	0.7016	5.6662e-05
0.70404	4.24408e-05	0.70404	6.20728e-05	0.70404	5.74982e-05
0.70648	4.27551e-05	0.70648	6.28357e-05	0.70648	5.83832e-05
0.70892	4.30847e-05	0.70892	6.36292e-05	0.70892	5.93201e-05
0.71136	4.34448e-05	0.71136	6.44531e-05	0.71136	6.03149e-05
0.71381	4.38324e-05	0.71381	6.53687e-05	0.71381	6.12793e-05
0.71625	4.42322e-05	0.71625	6.63147e-05	0.71625	6.23779e-05
0.71869	4.46686e-05	0.71869	6.73218e-05	0.71869	6.36292e-05
0.72113	4.51172e-05	0.72113	6.83899e-05	0.72113	6.49109e-05
0.72357	4.56085e-05	0.72357	6.95496e-05	0.72357	6.62842e-05
0.72601	4.6106e-05	0.72601	7.07092e-05	0.72601	6.77185e-05
0.72845	4.66492e-05	0.72845	7.19604e-05	0.72845	6.92749e-05
0.7309	4.7226e-05	0.7309	7.33337e-05	0.7309	7.08923e-05
0.73334	4.78485e-05	0.73334	7.47681e-05	0.73334	7.26318e-05
0.73578	4.84802e-05	0.73578	7.62329e-05	0.73578	7.44629e-05
0.73822	4.91852e-05	0.73822	7.78503e-05	0.73822	7.6416e-05
0.74066	4.98993e-05	0.74066	7.94678e-05	0.74066	7.83997e-05
0.7431	5.06683e-05	0.7431	8.12378e-05	0.7431	8.05664e-05
0.74554	5.14709e-05	0.74554	8.30688e-05	0.74554	8.27332e-05
0.74799	5.23224e-05	0.74799	8.49915e-05	0.74799	8.50525e-05
0.75043	5.32227e-05	0.75043	8.69751e-05	0.75043	8.74634e-05
0.75287	5.41901e-05	0.75287	8.91418e-05	0.75287	9.00269e-05
0.75531	5.51666e-05	0.75531	9.13086e-05	0.75531	9.26208e-05
0.75775	5.62347e-05	0.75775	9.36584e-05	0.75775	9.53674e-05
0.76019	5.73151e-05	0.76019	9.60083e-05	0.76019	9.81445e-05
0.76263	5.84839e-05	0.76263	9.85718e-05	0.76263	0.000101074
0.76508	5.9671e-05	0.76508	0.000101135	0.76508	0.000104004
0.76752	6.09314e-05	0.76752	0.000103821	0.76752	0.000107056
0.76996	6.21338e-05	0.76996	0.000106659	0.76996	0.000110229
0.7724	6.35376e-05	0.7724	0.000109619	0.7724	0.000113495
0.77484	6.49719e-05	0.77484	0.00011264	0.77484	0.00011673
0.77728	6.64978e-05	0.77728	0.000115845	0.77728	0.000120148
0.77972	6.80542e-05	0.77972	0.000119049	0.77972	0.000123535
0.78217	6.97021e-05	0.78217	0.000122437	0.78217	0.000127075
0.78461	7.13806e-05	0.78461	0.000125885	0.78461	0.000130676
0.78705	7.31812e-05	0.78705	0.000129517	0.78705	0.000134399
0.78949	7.50427e-05	0.78949	0.000133209	0.78949	0.000138184
0.79193	7.70264e-05	0.79193	0.000137115	0.79193	0.00014212
0.79437	7.89795e-05	0.79437	0.000141022	0.79437	0.000146027
0.79681	8.11157e-05	0.79681	0.000145172	0.79681	0.000150146
0.79926	8.3252e-05	0.79926	0.000149292	0.79926	0.000154205
0.8017	8.54797e-05	0.8017	0.000153687	0.8017	0.000158539
0.80414	8.7738e-05	0.80414	0.000158051	0.80414	0.00016275
0.80658	9.01489e-05	0.80658	0.000162598	0.80658	0.000167175
0.80902	9.26208e-05	0.80902	0.000167267	0.80902	0.000171692
0.81146	9.52454e-05	0.81146	0.00017218	0.81146	0.000176392
0.8139	9.78394e-05	0.8139	0.000176971	0.8139	0.000180969
0.81635	0.000100616	0.81635	0.000182098	0.81635	0.000185852
0.81879	0.000103363	0.81879	0.000187164	0.81879	0.000190643
0.82123	0.000106293	0.82123	0.000192474	0.82123	0.000195679
0.82367	0.000109253	0.82367	0.000197815	0.82367	0.000200684
0.82611	0.000112305	0.82611	0.000203339	0.82611	0.000205841
0.82855	0.000115479	0.82855	0.000208984	0.82855	0.00021109
0.83099	0.000118774	0.83099	0.000214844	0.83099	0.000216583
0.83344	0.00012207	0.83344	0.000220642	0.83344	0.000221924
0.83588	0.00012558	0.83588	0.000226776	0.83588	0.0002276
0.83832	0.000129028	0.83832	0.000232788	0.83832	0.000233154
0.84076	0.000132721	0.84076	0.000239136	0.84076	0.000239014
0.8432	0.000136353	0.8432	0.000245392	0.8432	0.00024472
0.84564	0.000140167	0.84564	0.000251862	0.84564	0.000250671
0.84808	0.000144043	0.84808	0.000258423	0.84808	0.000256714
0.85052	0.000148132	0.85052	0.000265259	0.85052	0.000262909
0.85297	0.000152161	0.85297	0.000271973	0.85297	0.000268982
0.85541	0.000156464	0.85541	0.000279022	0.85541	0.000275482
0.85785	0.000160706	0.85785	0.00028595	0.85785	0.000281738
0.86029	0.0001651	0.86029	0.000293152	0.86029	0.000288269
0.86273	0.000169586	0.86273	0.000300354	0.86273	0.0002948
0.86517	0.000174164	0.86517	0.000307739	0.86517	0.000301483
0.86761	0.000178833	0.86761	0.000315216	0.86761	0.000308289
0.87006	0.000183716	0.87006	0.000322968	0.87006	0.000315338
0.8725	0.000188507	0.8725	0.000330566	0.8725	0.000322174
0.87494	0.000193604	0.87494	0.000338531	0.87494	0.000329437
0.87738	0.000198578	0.87738	0.000346313	0.87738	0.000336487
0.87982	0.000203857	0.87982	0.000354462	0.87982	0.000343933
0.88226	0.000209076	0.88226	0.000362427	0.88226	0.000351166
0.8847	0.000214478	0.8847	0.000370636	0.8847	0.000358643
0.88715	0.000220001	0.88715	0.000378937	0.88715	0.000366211
0.88959	0.000225677	0.88959	0.000387451	0.88959	0.000373993
0.89203	0.000231262	0.89203	0.000395752	0.89203	0.000381592
0.89447	0.000237152	0.89447	0.000404419	0.89447	0.000389618
0.89691	0.00024295	0.89691	0.000412872	0.89691	0.000397369
0.89935	0.000249023	0.89935	0.0004216	0.89935	0.000405396
0.90179	0.000255066	0.90179	0.000430237	0.90179	0.000413391
0.90424	0.000261261	0.90424	0.000439087	0.90424	0.000421539
0.90668	0.000267578	0.90668	0.000447998	0.90668	0.000429718
0.90912	0.000274109	0.90912	0.000457184	0.90912	0.000438171
0.91156	0.000280487	0.91156	0.000466064	0.91156	0.000446289
0.914	0.000287231	0.914	0.000475433	0.914	0.000454834
0.91644	0.000293823	0.91644	0.000484497	0.91644	0.000463074
0.91888	0.000300781	0.91888	0.000494019	0.91888	0.000471771
0.92133	0.000307587	0.92133	0.000503265	0.92133	0.000480133
0.92377	0.000314636	0.92377	0.000512817	0.92377	0.00048877
0.92621	0.000321777	0.92621	0.000522491	0.92621	0.000497406
0.92865	0.000329132	0.92865	0.000532471	0.92865	0.000506348
0.93109	0.000336273	0.93109	0.000542236	0.93109	0.000514893
0.93353	0.000343811	0.93353	0.000552612	0.93353	0.000523926
0.93597	0.000351135	0.93597	0.000562805	0.93597	0.000532593
0.93842	0.000358826	0.93842	0.0005737	0.93842	0.000541718
0.94086	0.000366425	0.94086	0.000584686	0.94086	0.000550659
0.9433	0.000374146	0.9433	0.00059613	0.9433	0.000559631
0.94574	0.000381927	0.94574	0.000608002	0.94574	0.000568695
0.94818	0.000389954	0.94818	0.000620728	0.94818	0.000578033
0.95062	0.000397797	0.95062	0.000632629	0.95062	0.000587067
0.95306	0.000405975	0.95306	0.000645447	0.95306	0.000596619
0.95551	0.000413971	0.95551	0.000657654	0.95551	0.000605835
0.95795	0.000422333	0.95795	0.000670166	0.95795	0.000615845
0.96039	0.000430481	0.96039	0.000682373	0.96039	0.000625305
0.96283	0.000438904	0.96283	0.00069458	0.96283	0.000635071
0.96527	0.000447388	0.96527	0.000706177	0.96527	0.000645142
0.96771	0.000456146	0.96771	0.000718384	0.96771	0.000655823
0.97015	0.000464661	0.97015	0.000729675	0.97015	0.000666199
0.9726	0.000473663	0.9726	0.000741577	0.9726	0.000677185
0.97504	0.000482391	0.97504	0.000752563	0.97504	0.000688171
0.97748	0.000491394	0.97748	0.00076355	0.97748	0.000699768
0.97992	0.000500458	0.97992	0.000774231	0.97992	0.000710754
0.98236	0.000509766	0.98236	0.000784607	0.98236	0.000722351
0.9848	0.000519257	0.9848	0.000794983	0.9848	0.000733643
0.98724	0.000529083	0.98724	0.000805359	0.98724	0.000744629
0.98969	0.000538788	0.98969	0.000814819	0.98969	0.00075531
0.99213	0.000548981	0.99213	0.00082428	0.99213	0.000765991
0.99457	0.00055896	0.99457	0.00083313	0.99457	0.000776062
0.99701	0.000569672	0.99701	0.000840759	0.99701	0.000786133
0.99945	0.000579987	0.99945	0.000847778	0.99945	0.000795593
1.00189	0.000590668	1.00189	0.000855408	1.00189	0.000805054
