# Supplementary material for: In-depth chiral sensing capability of C-dots in a biomimetic protein-based hydrogel: a probe for chiral recognition applications
Source: Royal Society of Chemistry journal article supplement (doi:10.1039/d5bm01508a), 2026-01-01
Supplement: d5bm01508a1.zip [file Figure S14.xlsx]

## Sheet: Figure S14 (a)
200.745	3.325	3.885	3.744	3.637	3.682	3.592	3.93998
201.745	3.2	3.773	3.577	3.485	3.511	3.448	3.92098
202.745	3.074	3.643	3.417	3.329	3.355	3.292	3.89098
203.745	2.966	3.504	3.271	3.186	3.221	3.165	3.81598
204.745	2.861	3.413	3.158	3.073	3.102	3.061	3.78698
205.745	2.773	3.313	3.066	2.98	3.003	2.967	3.71098
206.745	2.708	3.227	2.983	2.904	2.93	2.894	3.65098
207.745	2.657	3.181	2.927	2.855	2.875	2.843	3.59898
208.745	2.631	3.143	2.896	2.82	2.842	2.814	3.58698
209.745	2.607	3.122	2.876	2.796	2.818	2.79	3.56498
210.745	2.581	3.089	2.851	2.767	2.802	2.766	3.53298
211.745	2.565	3.069	2.821	2.751	2.775	2.741	3.51398
212.745	2.555	3.061	2.81	2.741	2.766	2.733	3.48598
213.745	2.555	3.061	2.814	2.743	2.775	2.741	3.49398
214.745	2.575	3.09	2.835	2.766	2.798	2.759	3.51098
215.745	2.597	3.12	2.86	2.793	2.817	2.784	3.55698
216.745	2.603	3.129	2.87	2.802	2.826	2.795	3.55798
217.745	2.604	3.134	2.873	2.81	2.835	2.803	3.56198
218.745	2.621	3.149	2.893	2.823	2.854	2.816	3.59098
219.745	2.637	3.171	2.906	2.842	2.876	2.836	3.59598
220.745	2.667	3.22	2.944	2.878	2.914	2.876	3.62498
221.745	2.708	3.271	2.986	2.927	2.959	2.922	3.68198
222.745	2.733	3.303	3.02	2.952	2.986	2.956	3.70298
223.745	2.747	3.343	3.046	2.982	3.008	2.976	3.72098
224.745	2.787	3.387	3.087	3.026	3.055	3.015	3.76898
225.745	2.826	3.434	3.125	3.067	3.107	3.056	3.79398
226.745	2.841	3.478	3.156	3.089	3.13	3.086	3.80698
227.745	2.864	3.5	3.185	3.128	3.158	3.12	3.80198
228.745	2.895	3.559	3.23	3.154	3.198	3.146	3.84598
229.745	2.922	3.58	3.258	3.181	3.224	3.182	3.86998
230.745	2.947	3.621	3.291	3.225	3.264	3.207	3.86498
231.745	2.967	3.685	3.331	3.246	3.307	3.248	3.87498
232.745	2.978	3.681	3.353	3.276	3.328	3.27	3.87398
233.745	3	3.704	3.364	3.298	3.351	3.288	3.86598
234.745	3.003	3.717	3.387	3.306	3.356	3.29	3.89698
235.745	3.006	3.722	3.386	3.315	3.362	3.297	3.89298
236.745	2.998	3.729	3.378	3.31	3.353	3.292	3.87398
237.745	2.972	3.716	3.36	3.285	3.333	3.27	3.87498
238.745	2.965	3.691	3.342	3.256	3.308	3.251	3.84698
239.745	2.94	3.666	3.306	3.239	3.283	3.227	3.87698
240.745	2.921	3.639	3.266	3.205	3.253	3.192	3.83798
241.745	2.876	3.581	3.214	3.148	3.19	3.15	3.80798
242.745	2.822	3.54	3.149	3.088	3.124	3.083	3.78998
243.745	2.751	3.449	3.062	2.999	3.031	3.008	3.76498
244.745	2.657	3.339	2.955	2.897	2.917	2.894	3.70298
245.745	2.555	3.193	2.83	2.774	2.801	2.771	3.59598
246.745	2.441	3.03	2.699	2.642	2.668	2.642	3.45298
247.745	2.307	2.854	2.553	2.5	2.521	2.49	3.23898
248.745	2.165	2.642	2.4	2.347	2.371	2.333	3.00098
249.745	2.024	2.441	2.251	2.192	2.212	2.168	2.74498
250.745	1.878	2.243	2.097	2.036	2.055	2.005	2.47798
251.745	1.745	2.068	1.955	1.897	1.913	1.855	2.25298
252.745	1.627	1.92	1.835	1.774	1.791	1.729	2.05998
253.745	1.52	1.787	1.726	1.666	1.68	1.613	1.89198
254.745	1.429	1.672	1.627	1.568	1.581	1.514	1.74798
255.745	1.347	1.572	1.539	1.481	1.493	1.426	1.62298
256.745	1.273	1.48	1.459	1.401	1.408	1.345	1.51098
257.745	1.203	1.395	1.383	1.324	1.333	1.269	1.40998
258.745	1.139	1.318	1.313	1.256	1.261	1.2	1.31898
259.745	1.081	1.248	1.249	1.192	1.196	1.136	1.23898
260.745	1.027	1.184	1.189	1.134	1.135	1.077	1.16498
261.745	0.979	1.126	1.133	1.08	1.08	1.024	1.09898
262.745	0.924	1.079	1.076	1.024	1.021	0.981	1.04098
263.745	0.883	1.027	1.028	0.978	0.974	0.935	0.98698
264.745	0.844	0.981	0.984	0.936	0.929	0.894	0.93798
265.745	0.811	0.942	0.945	0.899	0.89	0.856	0.89398
266.745	0.778	0.902	0.906	0.861	0.852	0.821	0.85298
267.745	0.748	0.865	0.871	0.828	0.816	0.789	0.81598
268.745	0.721	0.832	0.839	0.797	0.786	0.76	0.78298
269.745	0.695	0.8	0.807	0.768	0.755	0.732	0.75198
270.745	0.67	0.771	0.778	0.741	0.727	0.706	0.72298
271.745	0.647	0.743	0.75	0.716	0.702	0.683	0.69698
272.745	0.628	0.719	0.726	0.694	0.678	0.662	0.67498
273.745	0.609	0.695	0.702	0.673	0.656	0.643	0.65398
274.745	0.59	0.673	0.68	0.653	0.636	0.626	0.63498
275.745	0.574	0.652	0.66	0.635	0.618	0.61	0.61898
276.745	0.559	0.634	0.642	0.619	0.602	0.596	0.60198
277.745	0.545	0.617	0.625	0.605	0.587	0.584	0.58898
278.745	0.533	0.602	0.609	0.591	0.574	0.573	0.57798
279.745	0.522	0.588	0.595	0.579	0.561	0.563	0.56798
280.745	0.51	0.574	0.581	0.568	0.551	0.554	0.55798
281.745	0.5	0.561	0.567	0.557	0.541	0.546	0.54898
282.745	0.49	0.55	0.557	0.548	0.531	0.539	0.54198
283.745	0.481	0.538	0.545	0.539	0.523	0.534	0.53498
284.745	0.473	0.527	0.534	0.53	0.515	0.528	0.52898
285.745	0.464	0.517	0.524	0.522	0.507	0.523	0.52398
286.745	0.456	0.508	0.513	0.515	0.501	0.518	0.51898
287.745	0.45	0.499	0.505	0.509	0.496	0.515	0.51598
288.745	0.442	0.49	0.497	0.502	0.49	0.511	0.51198
289.745	0.436	0.483	0.49	0.497	0.486	0.51	0.50898
290.745	0.43	0.476	0.483	0.493	0.482	0.508	0.50698
291.745	0.425	0.47	0.475	0.489	0.479	0.506	0.50598
292.745	0.42	0.464	0.471	0.486	0.477	0.506	0.50398
293.745	0.416	0.458	0.465	0.483	0.475	0.506	0.50498
294.745	0.41	0.454	0.46	0.48	0.473	0.506	0.50398
295.745	0.408	0.449	0.456	0.477	0.472	0.506	0.50398
296.745	0.404	0.445	0.452	0.477	0.472	0.508	0.50498
297.745	0.402	0.442	0.449	0.476	0.472	0.509	0.50698
298.745	0.398	0.438	0.447	0.475	0.473	0.512	0.50798
299.745	0.396	0.436	0.444	0.475	0.475	0.514	0.50998
300.745	0.394	0.434	0.442	0.476	0.476	0.516	0.51298
301.745	0.392	0.432	0.441	0.476	0.478	0.519	0.51498
302.745	0.39	0.43	0.439	0.476	0.478	0.522	0.51798
303.745	0.389	0.429	0.439	0.477	0.481	0.524	0.52098
304.745	0.388	0.427	0.437	0.478	0.484	0.528	0.52398
305.745	0.386	0.426	0.436	0.48	0.486	0.531	0.52698
306.745	0.385	0.426	0.437	0.482	0.488	0.534	0.53098
307.745	0.385	0.425	0.437	0.484	0.492	0.538	0.53398
308.745	0.385	0.424	0.437	0.486	0.495	0.541	0.53798
309.745	0.383	0.424	0.438	0.488	0.499	0.544	0.54098
310.745	0.382	0.424	0.439	0.491	0.503	0.548	0.54498
311.745	0.381	0.424	0.44	0.494	0.507	0.552	0.54898
312.745	0.381	0.424	0.441	0.497	0.511	0.556	0.55298
313.745	0.38	0.424	0.442	0.499	0.515	0.559	0.55798
314.745	0.379	0.425	0.444	0.503	0.52	0.563	0.56198
315.745	0.379	0.425	0.446	0.507	0.524	0.567	0.56598
316.745	0.378	0.425	0.447	0.51	0.529	0.571	0.57098
317.745	0.378	0.427	0.45	0.514	0.535	0.576	0.57698
318.745	0.377	0.427	0.452	0.518	0.54	0.58	0.58198
319.745	0.377	0.429	0.455	0.522	0.546	0.585	0.58698
320.745	0.377	0.429	0.457	0.528	0.553	0.59	0.59298
321.745	0.377	0.431	0.461	0.533	0.559	0.596	0.59998
322.745	0.377	0.432	0.464	0.538	0.565	0.602	0.60598
323.745	0.378	0.434	0.467	0.543	0.573	0.608	0.61198
324.745	0.379	0.436	0.47	0.549	0.58	0.614	0.61998
325.745	0.381	0.439	0.474	0.556	0.587	0.621	0.62798
326.745	0.382	0.441	0.478	0.562	0.595	0.628	0.63598
327.745	0.384	0.444	0.482	0.569	0.604	0.636	0.64398
328.745	0.386	0.447	0.487	0.576	0.612	0.644	0.65298
329.745	0.393	0.454	0.494	0.581	0.617	0.656	0.66398
330.745	0.395	0.457	0.498	0.589	0.626	0.664	0.67398
331.745	0.397	0.46	0.502	0.596	0.635	0.674	0.68398
332.745	0.399	0.463	0.507	0.603	0.644	0.682	0.69398
333.745	0.402	0.466	0.511	0.61	0.653	0.691	0.70398
334.745	0.404	0.469	0.516	0.618	0.662	0.701	0.71598
335.745	0.407	0.473	0.52	0.626	0.673	0.711	0.72698
336.745	0.41	0.476	0.525	0.634	0.682	0.72	0.73898
337.745	0.413	0.48	0.53	0.643	0.693	0.731	0.75098
338.745	0.416	0.484	0.535	0.651	0.703	0.742	0.76198
339.745	0.419	0.488	0.54	0.659	0.713	0.752	0.77498
340.745	0.422	0.492	0.546	0.668	0.724	0.764	0.78798
341.745	0.425	0.496	0.551	0.677	0.735	0.775	0.80198
342.745	0.429	0.5	0.557	0.686	0.746	0.786	0.81498
343.745	0.432	0.504	0.562	0.696	0.757	0.797	0.82898
344.745	0.435	0.508	0.568	0.704	0.768	0.808	0.84198
345.745	0.439	0.513	0.574	0.713	0.778	0.82	0.85498
346.745	0.442	0.517	0.579	0.722	0.789	0.83	0.86798
347.745	0.445	0.521	0.584	0.73	0.799	0.84	0.87998
348.745	0.448	0.525	0.589	0.738	0.807	0.85	0.89198
349.745	0.451	0.528	0.594	0.746	0.817	0.859	0.90298
350.745	0.454	0.532	0.598	0.753	0.826	0.868	0.91398
351.745	0.457	0.535	0.603	0.76	0.834	0.876	0.92398
352.745	0.46	0.538	0.607	0.767	0.842	0.884	0.93398
353.745	0.462	0.542	0.611	0.773	0.85	0.892	0.94398
354.745	0.465	0.545	0.615	0.779	0.857	0.899	0.95198
355.745	0.467	0.547	0.619	0.785	0.863	0.905	0.96098
356.745	0.469	0.55	0.623	0.791	0.87	0.912	0.96898
357.745	0.471	0.552	0.626	0.796	0.876	0.918	0.97698
358.745	0.473	0.555	0.629	0.801	0.881	0.923	0.98298
359.745	0.475	0.557	0.632	0.805	0.887	0.928	0.98998
360.745	0.477	0.56	0.635	0.81	0.891	0.933	0.99598
361.745	0.479	0.561	0.637	0.813	0.895	0.937	0.99998
362.745	0.48	0.563	0.64	0.817	0.9	0.94	1.00498
363.745	0.481	0.565	0.642	0.82	0.903	0.943	1.00898
364.745	0.482	0.566	0.644	0.822	0.905	0.944	1.01098
365.745	0.483	0.567	0.645	0.824	0.907	0.946	1.01298
366.745	0.483	0.568	0.645	0.824	0.907	0.946	1.01298
367.745	0.483	0.567	0.646	0.825	0.907	0.945	1.01198
368.745	0.483	0.567	0.646	0.825	0.907	0.944	1.01098
369.745	0.482	0.566	0.645	0.823	0.905	0.941	1.00798
370.745	0.481	0.565	0.644	0.822	0.903	0.938	1.00398
371.745	0.48	0.564	0.643	0.819	0.9	0.934	0.99898
372.745	0.478	0.562	0.641	0.816	0.896	0.928	0.99298
373.745	0.474	0.556	0.637	0.814	0.894	0.923	0.98398
374.745	0.471	0.553	0.634	0.81	0.888	0.916	0.97598
375.745	0.469	0.55	0.63	0.804	0.882	0.908	0.96698
376.745	0.465	0.546	0.626	0.798	0.874	0.9	0.95698
377.745	0.462	0.542	0.622	0.791	0.866	0.891	0.94598
378.745	0.458	0.538	0.616	0.784	0.857	0.881	0.93398
379.745	0.453	0.533	0.611	0.776	0.847	0.87	0.92098
380.745	0.449	0.527	0.605	0.768	0.838	0.859	0.90798
381.745	0.444	0.522	0.598	0.758	0.827	0.847	0.89298
382.745	0.439	0.516	0.592	0.749	0.815	0.835	0.87898
383.745	0.434	0.509	0.584	0.739	0.803	0.822	0.86398
384.745	0.428	0.502	0.576	0.728	0.79	0.808	0.84698
385.745	0.422	0.495	0.569	0.717	0.777	0.794	0.83098
386.745	0.416	0.488	0.559	0.704	0.763	0.779	0.81398
387.745	0.409	0.48	0.55	0.692	0.748	0.763	0.79498
388.745	0.402	0.472	0.541	0.679	0.732	0.747	0.77698
389.745	0.395	0.463	0.531	0.666	0.717	0.731	0.75798
390.745	0.387	0.454	0.521	0.652	0.7	0.714	0.73898
391.745	0.38	0.445	0.51	0.638	0.684	0.697	0.71998
392.745	0.372	0.436	0.5	0.624	0.667	0.68	0.69998
393.745	0.364	0.427	0.489	0.609	0.65	0.663	0.68098
394.745	0.356	0.417	0.478	0.594	0.633	0.645	0.66098
395.745	0.348	0.408	0.467	0.579	0.615	0.627	0.64198
396.745	0.34	0.398	0.456	0.564	0.597	0.609	0.62198
397.745	0.332	0.388	0.444	0.548	0.579	0.591	0.60298
398.745	0.324	0.378	0.432	0.533	0.561	0.574	0.58298
399.745	0.315	0.368	0.421	0.517	0.543	0.555	0.56298
400.745	0.307	0.358	0.409	0.501	0.524	0.537	0.54398
401.745	0.298	0.348	0.397	0.486	0.506	0.52	0.52498
402.745	0.29	0.337	0.385	0.469	0.487	0.501	0.50498
403.745	0.281	0.327	0.373	0.453	0.468	0.483	0.48698
404.745	0.273	0.318	0.361	0.439	0.451	0.466	0.46898
405.745	0.264	0.308	0.35	0.424	0.433	0.449	0.45098
406.745	0.256	0.298	0.338	0.408	0.415	0.432	0.43298
407.745	0.248	0.288	0.326	0.393	0.397	0.415	0.41598
408.745	0.24	0.278	0.315	0.378	0.38	0.399	0.39898
409.745	0.232	0.269	0.304	0.363	0.363	0.382	0.38298
410.745	0.224	0.259	0.293	0.348	0.346	0.366	0.36598
411.745	0.216	0.25	0.282	0.335	0.33	0.351	0.35098
412.745	0.209	0.241	0.271	0.321	0.314	0.335	0.33498
413.745	0.201	0.233	0.261	0.308	0.298	0.32	0.31998
414.745	0.195	0.224	0.251	0.295	0.283	0.306	0.30698
415.745	0.188	0.216	0.242	0.282	0.268	0.292	0.29298
416.745	0.181	0.208	0.232	0.269	0.254	0.279	0.27998
417.745	0.175	0.201	0.223	0.258	0.241	0.266	0.26698
418.745	0.169	0.193	0.215	0.246	0.228	0.253	0.25398
419.745	0.163	0.186	0.206	0.235	0.214	0.241	0.24198
420.745	0.157	0.179	0.198	0.225	0.202	0.23	0.23098
421.745	0.152	0.173	0.19	0.215	0.191	0.219	0.22098
422.745	0.146	0.166	0.183	0.205	0.18	0.209	0.20998
423.745	0.141	0.16	0.176	0.196	0.169	0.199	0.20098
424.745	0.136	0.154	0.169	0.187	0.159	0.189	0.19198
425.745	0.132	0.149	0.163	0.179	0.149	0.18	0.18298
426.745	0.127	0.144	0.156	0.171	0.14	0.171	0.17498
427.745	0.123	0.138	0.151	0.163	0.131	0.163	0.16698
428.745	0.119	0.134	0.145	0.156	0.123	0.155	0.15998
429.745	0.116	0.129	0.139	0.149	0.115	0.147	0.15298
430.745	0.112	0.124	0.134	0.142	0.107	0.141	0.14598
431.745	0.108	0.12	0.129	0.136	0.1	0.134	0.13998
432.745	0.105	0.116	0.125	0.13	0.093	0.127	0.13498
433.745	0.102	0.112	0.12	0.125	0.087	0.121	0.12898
434.745	0.099	0.109	0.116	0.12	0.081	0.116	0.12398
435.745	0.096	0.105	0.112	0.115	0.076	0.111	0.11898
436.745	0.093	0.102	0.109	0.111	0.07	0.106	0.11498
437.745	0.091	0.099	0.105	0.106	0.066	0.102	0.11098
438.745	0.089	0.097	0.102	0.103	0.061	0.097	0.10698
439.745	0.087	0.094	0.099	0.099	0.057	0.093	0.10398
440.745	0.085	0.091	0.096	0.096	0.053	0.09	0.09998
441.745	0.083	0.089	0.094	0.093	0.05	0.087	0.09698
442.745	0.081	0.087	0.091	0.09	0.047	0.083	0.09398
443.745	0.08	0.085	0.089	0.087	0.044	0.081	0.09198
444.745	0.078	0.083	0.087	0.085	0.041	0.078	0.08898
445.745	0.076	0.082	0.085	0.082	0.038	0.076	0.08698
446.745	0.075	0.08	0.083	0.08	0.036	0.074	0.08498
447.745	0.074	0.078	0.081	0.078	0.034	0.072	0.08298
448.745	0.072	0.077	0.08	0.076	0.032	0.07	0.08098
449.745	0.071	0.076	0.078	0.074	0.03	0.068	0.07998
450.745	0.07	0.074	0.077	0.073	0.028	0.067	0.07798
451.745	0.069	0.073	0.075	0.071	0.026	0.065	0.07598
452.745	0.068	0.072	0.074	0.07	0.025	0.064	0.07498
453.745	0.067	0.071	0.073	0.069	0.023	0.062	0.07398
454.745	0.066	0.069	0.071	0.067	0.022	0.061	0.07198
455.745	0.065	0.068	0.07	0.066	0.021	0.06	0.07098
456.745	0.064	0.067	0.069	0.065	0.019	0.059	0.06998
457.745	0.063	0.066	0.068	0.064	0.018	0.058	0.06898
458.745	0.062	0.065	0.067	0.063	0.017	0.056	0.06798
459.745	0.061	0.064	0.066	0.061	0.016	0.056	0.06698
460.745	0.06	0.063	0.065	0.061	0.015	0.055	0.06598
461.745	0.06	0.062	0.064	0.06	0.014	0.054	0.06498
462.745	0.059	0.061	0.063	0.059	0.013	0.053	0.06398
463.745	0.058	0.061	0.062	0.058	0.012	0.052	0.06298
464.745	0.057	0.06	0.061	0.057	0.011	0.051	0.06298
465.745	0.056	0.059	0.06	0.056	0.01	0.05	0.06198
466.745	0.056	0.058	0.06	0.055	0.01	0.05	0.06098
467.745	0.055	0.057	0.059	0.054	0.009	0.049	0.05998
468.745	0.054	0.057	0.058	0.054	0.008	0.048	0.05898
469.745	0.054	0.056	0.057	0.053	0.007	0.047	0.05898
470.745	0.053	0.055	0.056	0.052	0.006	0.047	0.05798
471.745	0.052	0.054	0.055	0.051	0.006	0.046	0.05698
472.745	0.052	0.054	0.055	0.051	0.005	0.046	0.05698
473.745	0.051	0.053	0.054	0.05	0.004	0.045	0.05598
474.745	0.05	0.052	0.053	0.049	0.004	0.044	0.05598
475.745	0.05	0.052	0.053	0.049	0.003	0.044	0.05498
476.745	0.049	0.051	0.052	0.048	0.002	0.043	0.05498
477.745	0.049	0.051	0.052	0.048	0.002	0.043	0.05398
478.745	0.048	0.05	0.051	0.047	0.001	0.042	0.05398
479.745	0.048	0.049	0.05	0.046	0.001	0.042	0.05298
480.745	0.047	0.049	0.049	0.046	0	0.041	0.05198
481.745	0.047	0.048	0.049	0.045	-0.001	0.041	0.05198
482.745	0.046	0.047	0.048	0.044	-0.001	0.04	0.05098
483.745	0.045	0.047	0.048	0.044	-0.002	0.04	0.05098
484.745	0.045	0.046	0.047	0.043	-0.002	0.039	0.04998
485.745	0.044	0.046	0.046	0.043	-0.003	0.039	0.04998
486.745	0.044	0.045	0.046	0.042	-0.003	0.038	0.04898
487.745	0.043	0.044	0.045	0.042	-0.004	0.038	0.04898
488.745	0.043	0.044	0.045	0.041	-0.005	0.037	0.04798
489.745	0.042	0.043	0.044	0.04	-0.005	0.036	0.04798
490.745	0.042	0.043	0.043	0.04	-0.006	0.036	0.04698
491.745	0.041	0.042	0.043	0.039	-0.006	0.036	0.04698
492.745	0.041	0.042	0.042	0.039	-0.007	0.035	0.04698
493.745	0.043	0.043	0.042	0.04	-0.006	0.036	0.04698
494.745	0.042	0.042	0.042	0.039	-0.006	0.036	0.04598
495.745	0.042	0.042	0.041	0.039	-0.007	0.035	0.04598
496.745	0.041	0.041	0.041	0.038	-0.008	0.035	0.04498
497.745	0.041	0.041	0.04	0.038	-0.008	0.035	0.04498
498.745	0.04	0.04	0.04	0.037	-0.008	0.034	0.04398
499.745	0.04	0.04	0.039	0.037	-0.009	0.034	0.04398
500.745	0.039	0.039	0.039	0.037	-0.009	0.033	0.04298
501.745	0.039	0.039	0.039	0.036	-0.009	0.033	0.04298
502.745	0.039	0.039	0.038	0.036	-0.01	0.033	0.04298
503.745	0.038	0.038	0.038	0.036	-0.01	0.033	0.04198
504.745	0.038	0.038	0.037	0.035	-0.01	0.033	0.04198
505.745	0.038	0.038	0.037	0.035	-0.01	0.032	0.04198
506.745	0.037	0.038	0.037	0.035	-0.011	0.032	0.04198
507.745	0.037	0.037	0.037	0.034	-0.011	0.032	0.04098
508.745	0.037	0.037	0.036	0.034	-0.011	0.031	0.04098
509.745	0.037	0.037	0.036	0.034	-0.012	0.031	0.04098
510.745	0.036	0.036	0.035	0.033	-0.012	0.031	0.04098
511.745	0.036	0.036	0.035	0.033	-0.013	0.03	0.03998
512.745	0.035	0.035	0.034	0.032	-0.013	0.03	0.03998
513.745	0.035	0.035	0.034	0.032	-0.013	0.03	0.03998
514.745	0.034	0.034	0.034	0.032	-0.014	0.029	0.03898
515.745	0.034	0.034	0.033	0.031	-0.014	0.029	0.03898
516.745	0.033	0.034	0.033	0.031	-0.015	0.028	0.03798
517.745	0.033	0.033	0.032	0.03	-0.015	0.028	0.03798
518.745	0.032	0.032	0.031	0.029	-0.016	0.027	0.03698
519.745	0.032	0.032	0.031	0.029	-0.016	0.027	0.03698
520.745	0.031	0.032	0.031	0.029	-0.016	0.027	0.03598
521.745	0.031	0.031	0.03	0.028	-0.017	0.026	0.03598
522.745	0.031	0.031	0.03	0.028	-0.017	0.026	0.03598
523.745	0.03	0.03	0.03	0.028	-0.018	0.026	0.03598
524.745	0.03	0.03	0.029	0.027	-0.018	0.025	0.03598
525.745	0.03	0.03	0.029	0.027	-0.018	0.025	0.03598
526.745	0.03	0.03	0.029	0.027	-0.018	0.025	0.03598
527.745	0.03	0.029	0.029	0.027	-0.018	0.025	0.03598
528.745	0.03	0.029	0.029	0.027	-0.018	0.025	0.03698
529.745	0.03	0.029	0.029	0.027	-0.019	0.025	0.03698
530.745	0.03	0.029	0.028	0.027	-0.019	0.024	0.03698
531.745	0.03	0.029	0.028	0.027	-0.019	0.024	0.03698
532.745	0.03	0.028	0.028	0.027	-0.019	0.024	0.03698
533.745	0.03	0.028	0.028	0.027	-0.019	0.024	0.03598
534.745	0.029	0.028	0.028	0.026	-0.019	0.024	0.03598
535.745	0.029	0.028	0.027	0.026	-0.02	0.024	0.03598
536.745	0.029	0.028	0.027	0.026	-0.02	0.023	0.03598
537.745	0.029	0.027	0.027	0.026	-0.02	0.023	0.03598
538.745	0.029	0.027	0.027	0.026	-0.02	0.023	0.03598
539.745	0.029	0.027	0.027	0.026	-0.02	0.023	0.03598
540.745	0.028	0.027	0.027	0.026	-0.02	0.023	0.03598
541.745	0.028	0.027	0.027	0.026	-0.02	0.023	0.03498
542.745	0.028	0.027	0.027	0.026	-0.02	0.023	0.03498
543.745	0.028	0.027	0.026	0.026	-0.02	0.023	0.03498
544.745	0.028	0.027	0.026	0.025	-0.02	0.023	0.03498
545.745	0.028	0.026	0.026	0.025	-0.02	0.022	0.03498
546.745	0.027	0.026	0.026	0.025	-0.02	0.022	0.03498
547.745	0.027	0.026	0.026	0.025	-0.02	0.022	0.03398
548.745	0.027	0.026	0.026	0.025	-0.02	0.022	0.03398
549.745	0.027	0.026	0.026	0.025	-0.02	0.022	0.03398
550.745	0.027	0.026	0.026	0.025	-0.021	0.022	0.03398
551.745	0.027	0.026	0.026	0.025	-0.021	0.022	0.03398
552.745	0.027	0.025	0.025	0.025	-0.021	0.022	0.03398
553.745	0.027	0.025	0.025	0.025	-0.021	0.022	0.03398
554.745	0.026	0.025	0.025	0.024	-0.021	0.022	0.03298
555.745	0.026	0.025	0.025	0.024	-0.021	0.022	0.03298
556.745	0.026	0.025	0.025	0.024	-0.021	0.021	0.03298
557.745	0.026	0.025	0.025	0.024	-0.021	0.021	0.03198
558.745	0.026	0.025	0.024	0.024	-0.021	0.021	0.03198
559.745	0.025	0.025	0.024	0.024	-0.022	0.021	0.03198
560.745	0.025	0.024	0.024	0.024	-0.022	0.021	0.03198
561.745	0.025	0.024	0.024	0.023	-0.022	0.021	0.03198
562.745	0.025	0.024	0.024	0.023	-0.022	0.021	0.03198
563.745	0.025	0.024	0.024	0.023	-0.022	0.021	0.03098
564.745	0.024	0.024	0.023	0.023	-0.022	0.02	0.03098
565.745	0.024	0.023	0.023	0.023	-0.022	0.02	0.03098
566.745	0.024	0.023	0.023	0.023	-0.022	0.02	0.03098
567.745	0.024	0.023	0.023	0.022	-0.023	0.02	0.03098
568.745	0.024	0.023	0.023	0.022	-0.023	0.02	0.03098
569.745	0.024	0.023	0.023	0.022	-0.023	0.02	0.03098
570.745	0.023	0.023	0.022	0.022	-0.023	0.02	0.03098
571.745	0.023	0.022	0.022	0.022	-0.023	0.019	0.02998
572.745	0.023	0.022	0.022	0.022	-0.023	0.019	0.02998
573.745	0.023	0.022	0.022	0.022	-0.024	0.019	0.02998
574.745	0.023	0.022	0.022	0.022	-0.024	0.019	0.02998
575.745	0.022	0.022	0.022	0.021	-0.024	0.019	0.02998
576.745	0.022	0.022	0.022	0.021	-0.024	0.019	0.02998
577.745	0.022	0.021	0.021	0.021	-0.024	0.019	0.02898
578.745	0.022	0.021	0.021	0.021	-0.024	0.018	0.02898
579.745	0.022	0.021	0.021	0.021	-0.024	0.018	0.02898
580.745	0.022	0.021	0.021	0.02	-0.025	0.018	0.02898
581.745	0.022	0.021	0.021	0.021	-0.024	0.018	0.02898
582.745	0.022	0.021	0.021	0.021	-0.024	0.018	0.02898
583.745	0.022	0.021	0.021	0.02	-0.025	0.018	0.02798
584.745	0.021	0.021	0.021	0.02	-0.025	0.018	0.02798
585.745	0.021	0.021	0.021	0.02	-0.025	0.018	0.02798
586.745	0.021	0.02	0.021	0.02	-0.025	0.018	0.02798
587.745	0.021	0.02	0.02	0.02	-0.025	0.017	0.02798
588.745	0.021	0.02	0.02	0.02	-0.025	0.017	0.02798
589.745	0.021	0.02	0.02	0.02	-0.025	0.017	0.02798
590.745	0.02	0.02	0.02	0.02	-0.025	0.017	0.02798
591.745	0.02	0.02	0.02	0.019	-0.026	0.017	0.02798
592.745	0.02	0.019	0.019	0.019	-0.026	0.017	0.02798
593.745	0.02	0.019	0.019	0.019	-0.026	0.017	0.02698
594.745	0.019	0.019	0.019	0.019	-0.026	0.016	0.02698
595.745	0.019	0.019	0.019	0.019	-0.026	0.016	0.02698
596.745	0.019	0.019	0.019	0.018	-0.026	0.016	0.02698
597.745	0.019	0.019	0.019	0.018	-0.027	0.016	0.02698
598.745	0.019	0.018	0.018	0.018	-0.027	0.016	0.02698
599.745	0.019	0.018	0.018	0.018	-0.027	0.016	0.02698
600.745	0.019	0.018	0.018	0.018	-0.027	0.016	0.02698
601.745	0.018	0.018	0.018	0.018	-0.027	0.015	0.02598
602.745	0.018	0.018	0.018	0.018	-0.027	0.015	0.02598
603.745	0.018	0.018	0.018	0.017	-0.027	0.015	0.02598
604.745	0.018	0.018	0.017	0.017	-0.027	0.015	0.02598
605.745	0.018	0.017	0.017	0.017	-0.028	0.015	0.02598
606.745	0.018	0.017	0.017	0.017	-0.028	0.015	0.02498
607.745	0.017	0.017	0.017	0.017	-0.028	0.015	0.02498
608.745	0.017	0.017	0.017	0.017	-0.028	0.015	0.02498
609.745	0.017	0.017	0.017	0.016	-0.028	0.014	0.02498
610.745	0.017	0.017	0.017	0.016	-0.028	0.014	0.02498
611.745	0.017	0.016	0.016	0.016	-0.029	0.014	0.02498
612.745	0.017	0.017	0.017	0.017	-0.028	0.014	0.02498
613.745	0.017	0.017	0.017	0.016	-0.028	0.014	0.02498
614.745	0.017	0.016	0.017	0.016	-0.029	0.014	0.02498
615.745	0.016	0.016	0.016	0.016	-0.029	0.014	0.02498
616.745	0.016	0.016	0.016	0.016	-0.029	0.014	0.02498
617.745	0.016	0.016	0.016	0.016	-0.029	0.013	0.02498
618.745	0.016	0.016	0.016	0.015	-0.029	0.013	0.02498
619.745	0.016	0.016	0.016	0.015	-0.029	0.013	0.02498
620.745	0.016	0.015	0.016	0.015	-0.029	0.013	0.02398
621.745	0.015	0.015	0.015	0.015	-0.03	0.013	0.02398
622.745	0.015	0.015	0.015	0.015	-0.03	0.013	0.02398
623.745	0.015	0.015	0.015	0.015	-0.03	0.013	0.02398
624.745	0.015	0.015	0.015	0.015	-0.03	0.012	0.02398
625.745	0.015	0.015	0.015	0.015	-0.03	0.012	0.02398
626.745	0.015	0.014	0.015	0.014	-0.03	0.012	0.02398
627.745	0.015	0.014	0.015	0.014	-0.03	0.012	0.02398
628.745	0.014	0.014	0.014	0.014	-0.03	0.012	0.02298
629.745	0.014	0.014	0.014	0.014	-0.031	0.012	0.02298
630.745	0.014	0.014	0.014	0.014	-0.031	0.012	0.02298
631.745	0.014	0.013	0.014	0.014	-0.031	0.011	0.02298
632.745	0.014	0.013	0.014	0.013	-0.031	0.011	0.02298
633.745	0.014	0.013	0.014	0.013	-0.031	0.011	0.02298
634.745	0.014	0.013	0.013	0.013	-0.031	0.011	0.02198
635.745	0.013	0.013	0.013	0.013	-0.031	0.011	0.02198
636.745	0.013	0.013	0.013	0.013	-0.032	0.011	0.02198
637.745	0.013	0.013	0.013	0.013	-0.032	0.011	0.02198
638.745	0.013	0.012	0.013	0.013	-0.032	0.011	0.02198
639.745	0.013	0.012	0.013	0.012	-0.032	0.01	0.02198
640.745	0.012	0.012	0.012	0.012	-0.032	0.01	0.02198
641.745	0.012	0.012	0.012	0.012	-0.032	0.01	0.02198
642.745	0.012	0.012	0.012	0.012	-0.032	0.01	0.02198
643.745	0.012	0.012	0.012	0.012	-0.032	0.01	0.02198
644.745	0.012	0.012	0.012	0.012	-0.033	0.01	0.02198
645.745	0.012	0.012	0.012	0.012	-0.033	0.01	0.02198
646.745	0.012	0.011	0.012	0.012	-0.033	0.01	0.02198
647.745	0.011	0.011	0.012	0.011	-0.033	0.009	0.02198
648.745	0.011	0.011	0.011	0.011	-0.033	0.009	0.02198
649.745	0.011	0.011	0.011	0.011	-0.033	0.009	0.02198
650.745	0.011	0.011	0.011	0.011	-0.033	0.009	0.02198
651.745	0.011	0.011	0.011	0.011	-0.034	0.009	0.02098
652.745	0.011	0.011	0.011	0.011	-0.034	0.009	0.02198
653.745	0.011	0.01	0.011	0.011	-0.034	0.008	0.02098
654.745	0.01	0.01	0.011	0.01	-0.034	0.008	0.02098
655.745	0.01	0.01	0.01	0.01	-0.034	0.008	0.02098
656.745	0.01	0.01	0.01	0.01	-0.034	0.008	0.02098
657.745	0.01	0.01	0.01	0.01	-0.035	0.008	0.02098
658.745	0.01	0.01	0.01	0.01	-0.035	0.008	0.02098
659.745	0.009	0.009	0.01	0.01	-0.035	0.008	0.01998
660.745	0.01	0.009	0.01	0.01	-0.035	0.007	0.01998
661.745	0.009	0.009	0.01	0.009	-0.035	0.007	0.01998
662.745	0.009	0.009	0.009	0.009	-0.035	0.007	0.01998
663.745	0.009	0.009	0.009	0.009	-0.035	0.007	0.01998
664.745	0.009	0.009	0.009	0.009	-0.035	0.007	0.01998
665.745	0.009	0.008	0.009	0.009	-0.036	0.007	0.01998
666.745	0.009	0.008	0.009	0.009	-0.036	0.007	0.01998
667.745	0.009	0.008	0.009	0.009	-0.036	0.006	0.01998
668.745	0.009	0.008	0.009	0.008	-0.036	0.006	0.01998
669.745	0.008	0.008	0.008	0.008	-0.036	0.006	0.01998
670.745	0.008	0.008	0.008	0.008	-0.036	0.006	0.01998
671.745	0.008	0.008	0.008	0.008	-0.036	0.006	0.01998
672.745	0.008	0.007	0.008	0.008	-0.037	0.006	0.01998
673.745	0.008	0.007	0.008	0.008	-0.036	0.006	0.01998
674.745	0.008	0.007	0.008	0.008	-0.037	0.006	0.01998
675.745	0.007	0.007	0.007	0.007	-0.037	0.005	0.01998
676.745	0.007	0.007	0.007	0.007	-0.037	0.005	0.01998
677.745	0.007	0.007	0.007	0.007	-0.037	0.005	0.01998
678.745	0.007	0.006	0.007	0.007	-0.037	0.005	0.01898
679.745	0.007	0.006	0.007	0.007	-0.037	0.005	0.01898
680.745	0.007	0.006	0.007	0.007	-0.037	0.005	0.01898
681.745	0.007	0.006	0.007	0.007	-0.038	0.004	0.01898
682.745	0.006	0.006	0.007	0.006	-0.038	0.004	0.01898
683.745	0.006	0.006	0.006	0.006	-0.038	0.004	0.01898
684.745	0.006	0.006	0.006	0.006	-0.038	0.004	0.01898
685.745	0.006	0.005	0.006	0.006	-0.038	0.004	0.01898
686.745	0.006	0.005	0.006	0.006	-0.038	0.004	0.01898
687.745	0.006	0.005	0.006	0.006	-0.038	0.004	0.01898
688.745	0.006	0.005	0.006	0.006	-0.039	0.004	0.01898
689.745	0.006	0.005	0.006	0.006	-0.039	0.003	0.01898
690.745	0.006	0.005	0.006	0.006	-0.039	0.003	0.01898
691.745	0.005	0.005	0.005	0.005	-0.039	0.003	0.01798
692.745	0.005	0.005	0.006	0.005	-0.039	0.003	0.01798
693.745	0.005	0.004	0.005	0.005	-0.039	0.003	0.01798
694.745	0.005	0.004	0.005	0.005	-0.039	0.003	0.01798
695.745	0.005	0.004	0.005	0.005	-0.039	0.003	0.01798
696.745	0.005	0.004	0.005	0.005	-0.04	0.002	0.01798
697.745	0.005	0.004	0.005	0.005	-0.04	0.003	0.01798
698.745	0.005	0.004	0.005	0.004	-0.04	0.002	0.01798
699.745	0.004	0.004	0.004	0.004	-0.04	0.002	0.01798
700.745	0.004	0.003	0.004	0.004	-0.04	0.002	0.01798
701.745	0.004	0.003	0.004	0.004	-0.04	0.002	0.01798
702.745	0.004	0.003	0.004	0.004	-0.04	0.002	0.01798
703.745	0.004	0.003	0.004	0.004	-0.041	0.002	0.01798
704.745	0.004	0.003	0.004	0.004	-0.04	0.002	0.01798
705.745	0.003	0.002	0.003	0.004	-0.041	0.001	0.01798
706.745	0.003	0.002	0.003	0.003	-0.041	0.001	0.01798
707.745	0.003	0.002	0.003	0.003	-0.041	0.001	0.01798
708.745	0.003	0.002	0.003	0.003	-0.041	0.001	0.01798
709.745	0.003	0.002	0.003	0.003	-0.041	0.001	0.01798
710.745	0.003	0.002	0.003	0.003	-0.041	0.001	0.01798
711.745	0.003	0.002	0.003	0.003	-0.042	0.001	0.01798
712.745	0.002	0.001	0.002	0.002	-0.042	0	0.01698
713.745	0.003	0.001	0.003	0.002	-0.042	0.001	0.01798
714.745	0.002	0.001	0.002	0.002	-0.042	0	0.01698
715.745	0.002	0.001	0.002	0.002	-0.042	0	0.01698
716.745	0.002	0.001	0.002	0.002	-0.042	0	0.01698
717.745	0.005	0.006	0.006	0.006	-0.039	0.005	0.01898
718.745	0.005	0.006	0.006	0.005	-0.039	0.005	0.01898
719.745	0.005	0.006	0.006	0.005	-0.039	0.005	0.01898
720.745	0.005	0.006	0.006	0.005	-0.04	0.005	0.01898
721.745	0.005	0.005	0.006	0.005	-0.04	0.005	0.01898
722.745	0.005	0.005	0.005	0.005	-0.04	0.005	0.01898
723.745	0.005	0.005	0.005	0.005	-0.04	0.005	0.01898
724.745	0.004	0.005	0.005	0.004	-0.04	0.005	0.01798
725.745	0.004	0.005	0.005	0.004	-0.041	0.004	0.01798
726.745	0.004	0.004	0.004	0.004	-0.041	0.004	0.01798
727.745	0.003	0.004	0.004	0.004	-0.041	0.004	0.01798
728.745	0.003	0.004	0.004	0.003	-0.041	0.003	0.01798
729.745	0.003	0.003	0.004	0.003	-0.042	0.003	0.01798
730.745	0.003	0.003	0.003	0.003	-0.042	0.003	0.01798
731.745	0.003	0.003	0.003	0.003	-0.042	0.003	0.01798
732.745	0.003	0.003	0.003	0.003	-0.042	0.003	0.01798
733.745	0.003	0.003	0.003	0.003	-0.042	0.003	0.01798
734.745	0.002	0.003	0.003	0.003	-0.042	0.002	0.01798
735.745	0.002	0.003	0.003	0.003	-0.042	0.002	0.01698
736.745	0.002	0.003	0.003	0.003	-0.042	0.002	0.01798
737.745	0.002	0.003	0.003	0.003	-0.042	0.002	0.01798
738.745	0.002	0.003	0.003	0.003	-0.042	0.003	0.01798
739.745	0.002	0.003	0.003	0.003	-0.042	0.002	0.01798
740.745	0.002	0.003	0.003	0.002	-0.042	0.002	0.01798
741.745	0.002	0.002	0.002	0.002	-0.043	0.002	0.01798
742.745	0.002	0.002	0.003	0.002	-0.043	0.002	0.01798
743.745	0.002	0.002	0.002	0.002	-0.043	0.002	0.01798
744.745	0.002	0.002	0.002	0.002	-0.043	0.002	0.01798
745.745	0.001	0.002	0.002	0.002	-0.043	0.001	0.01798
746.745	0.001	0.001	0.002	0.001	-0.043	0.002	0.01798
747.745	0.001	0.001	0.002	0.001	-0.044	0.001	0.01798
748.745	0.001	0.001	0.001	0.001	-0.044	0.001	0.01798
749.745	0.001	0.001	0.001	0.001	-0.044	0.001	0.01798
750.745	0.001	0.001	0.001	0.001	-0.044	0.001	0.01698
751.745	0.001	0.001	0.001	0.001	-0.044	0.001	0.01698
752.745	0	0.001	0.001	0.001	-0.044	0	0.01698
753.745	0	0	0.001	0.001	-0.044	0	0.01698
754.745	0	0	0.001	0	-0.044	0	0.01698
755.745	0	0	0	0	-0.044	0	0.01698
756.745	0	0	0	0	-0.045	0	0.01698

## Sheet: Figure S14(b)
200.745	3.472	3.661	3.863	3.764	3.585	3.724	3.764
201.745	3.314	3.542	3.748	3.612	3.511	3.623	3.6
202.745	3.167	3.424	3.596	3.454	3.426	3.51	3.445
203.745	3.042	3.318	3.468	3.323	3.339	3.41	3.299
204.745	2.929	3.209	3.352	3.203	3.268	3.313	3.179
205.745	2.834	3.12	3.26	3.106	3.205	3.225	3.082
206.745	2.768	3.055	3.18	3.03	3.16	3.152	3.002
207.745	2.706	3.01	3.129	2.973	3.122	3.1	2.944
208.745	2.677	2.976	3.099	2.939	3.098	3.074	2.917
209.745	2.647	2.961	3.078	2.916	3.07	3.048	2.888
210.745	2.631	2.939	3.045	2.894	3.057	3.027	2.863
211.745	2.605	2.907	3.021	2.869	3.038	3.005	2.843
212.745	2.594	2.897	3.012	2.861	3.037	2.992	2.829
213.745	2.597	2.901	3.014	2.861	3.055	2.987	2.833
214.745	2.616	2.936	3.039	2.884	3.073	3.013	2.856
215.745	2.638	2.968	3.069	2.908	3.075	3.038	2.88
216.745	2.649	2.97	3.076	2.916	3.08	3.049	2.883
217.745	2.651	2.974	3.093	2.92	3.084	3.051	2.896
218.745	2.669	2.991	3.105	2.935	3.099	3.059	2.907
219.745	2.685	3.017	3.122	2.958	3.121	3.08	2.929
220.745	2.719	3.053	3.174	2.994	3.154	3.114	2.966
221.745	2.759	3.109	3.232	3.038	3.165	3.159	3.012
222.745	2.785	3.133	3.262	3.066	3.188	3.18	3.043
223.745	2.814	3.166	3.288	3.092	3.215	3.206	3.074
224.745	2.85	3.21	3.337	3.134	3.229	3.24	3.109
225.745	2.891	3.251	3.395	3.191	3.245	3.275	3.155
226.745	2.917	3.287	3.434	3.207	3.251	3.303	3.184
227.745	2.94	3.314	3.468	3.245	3.282	3.323	3.214
228.745	2.976	3.356	3.509	3.274	3.291	3.356	3.249
229.745	3.005	3.388	3.545	3.317	3.306	3.369	3.285
230.745	3.035	3.424	3.585	3.343	3.313	3.388	3.318
231.745	3.053	3.456	3.623	3.374	3.315	3.409	3.346
232.745	3.085	3.477	3.628	3.407	3.336	3.427	3.374
233.745	3.096	3.515	3.674	3.426	3.321	3.447	3.395
234.745	3.104	3.516	3.682	3.423	3.314	3.447	3.416
235.745	3.106	3.517	3.684	3.436	3.321	3.451	3.419
236.745	3.1	3.51	3.692	3.434	3.311	3.457	3.409
237.745	3.075	3.508	3.652	3.413	3.307	3.432	3.393
238.745	3.053	3.497	3.641	3.383	3.29	3.417	3.361
239.745	3.028	3.487	3.627	3.358	3.275	3.402	3.335
240.745	3	3.445	3.575	3.317	3.245	3.381	3.293
241.745	2.955	3.404	3.536	3.262	3.23	3.344	3.242
242.745	2.895	3.344	3.48	3.19	3.186	3.301	3.171
243.745	2.814	3.269	3.394	3.105	3.121	3.236	3.083
244.745	2.717	3.177	3.286	2.999	3.046	3.164	2.975
245.745	2.602	3.039	3.151	2.873	2.943	3.048	2.851
246.745	2.479	2.888	2.976	2.741	2.815	2.916	2.713
247.745	2.337	2.712	2.792	2.592	2.662	2.772	2.569
248.745	2.193	2.514	2.597	2.438	2.49	2.601	2.415
249.745	2.051	2.33	2.399	2.285	2.304	2.421	2.258
250.745	1.902	2.136	2.202	2.128	2.136	2.239	2.103
251.745	1.765	1.968	2.022	1.986	1.987	2.073	1.962
252.745	1.648	1.824	1.872	1.864	1.854	1.926	1.84
253.745	1.542	1.698	1.743	1.754	1.739	1.798	1.731
254.745	1.45	1.587	1.632	1.653	1.637	1.686	1.633
255.745	1.369	1.49	1.533	1.563	1.546	1.589	1.546
256.745	1.294	1.404	1.444	1.479	1.458	1.499	1.464
257.745	1.224	1.322	1.361	1.402	1.379	1.414	1.387
258.745	1.159	1.251	1.286	1.331	1.306	1.339	1.317
259.745	1.099	1.185	1.218	1.264	1.237	1.268	1.252
260.745	1.043	1.123	1.154	1.202	1.176	1.203	1.19
261.745	0.994	1.068	1.097	1.145	1.13	1.145	1.136
262.745	0.941	1.015	1.048	1.083	1.076	1.105	1.076
263.745	0.899	0.97	1	1.034	1.029	1.053	1.029
264.745	0.86	0.927	0.956	0.989	0.987	1.006	0.985
265.745	0.825	0.888	0.917	0.949	0.945	0.965	0.946
266.745	0.792	0.851	0.878	0.909	0.906	0.924	0.906
267.745	0.76	0.817	0.843	0.873	0.87	0.886	0.871
268.745	0.731	0.786	0.811	0.839	0.837	0.853	0.837
269.745	0.705	0.757	0.78	0.807	0.806	0.821	0.806
270.745	0.679	0.729	0.751	0.777	0.777	0.791	0.777
271.745	0.656	0.703	0.725	0.75	0.751	0.763	0.75
272.745	0.635	0.681	0.701	0.724	0.726	0.738	0.726
273.745	0.614	0.659	0.679	0.7	0.703	0.713	0.702
274.745	0.596	0.638	0.658	0.677	0.682	0.69	0.68
275.745	0.578	0.619	0.638	0.656	0.662	0.669	0.66
276.745	0.562	0.602	0.62	0.637	0.644	0.651	0.641
277.745	0.549	0.586	0.604	0.62	0.628	0.634	0.624
278.745	0.535	0.574	0.589	0.603	0.613	0.618	0.609
279.745	0.522	0.559	0.576	0.589	0.599	0.603	0.595
280.745	0.511	0.547	0.563	0.575	0.585	0.589	0.581
281.745	0.5	0.535	0.55	0.561	0.573	0.576	0.568
282.745	0.49	0.524	0.539	0.549	0.561	0.564	0.556
283.745	0.48	0.514	0.529	0.538	0.55	0.553	0.546
284.745	0.471	0.504	0.519	0.527	0.539	0.542	0.535
285.745	0.462	0.494	0.51	0.516	0.529	0.532	0.524
286.745	0.454	0.486	0.499	0.505	0.52	0.522	0.515
287.745	0.447	0.478	0.492	0.497	0.511	0.514	0.506
288.745	0.438	0.47	0.483	0.488	0.503	0.505	0.497
289.745	0.432	0.463	0.476	0.479	0.495	0.498	0.49
290.745	0.426	0.456	0.469	0.472	0.489	0.49	0.484
291.745	0.419	0.45	0.463	0.466	0.483	0.484	0.477
292.745	0.414	0.444	0.457	0.459	0.477	0.478	0.471
293.745	0.409	0.44	0.453	0.453	0.472	0.473	0.465
294.745	0.405	0.434	0.447	0.448	0.467	0.468	0.461
295.745	0.4	0.43	0.443	0.443	0.463	0.464	0.457
296.745	0.397	0.427	0.44	0.439	0.461	0.46	0.454
297.745	0.394	0.424	0.436	0.435	0.458	0.458	0.45
298.745	0.391	0.421	0.434	0.432	0.455	0.455	0.448
299.745	0.388	0.418	0.431	0.429	0.453	0.453	0.446
300.745	0.386	0.416	0.428	0.427	0.451	0.451	0.443
301.745	0.385	0.414	0.427	0.425	0.449	0.449	0.442
302.745	0.382	0.412	0.425	0.422	0.447	0.447	0.441
303.745	0.381	0.41	0.424	0.421	0.447	0.447	0.44
304.745	0.379	0.408	0.422	0.42	0.445	0.446	0.439
305.745	0.377	0.407	0.422	0.418	0.446	0.445	0.438
306.745	0.377	0.407	0.42	0.418	0.445	0.445	0.438
307.745	0.376	0.405	0.419	0.417	0.445	0.444	0.438
308.745	0.374	0.404	0.418	0.418	0.445	0.445	0.439
309.745	0.373	0.404	0.419	0.418	0.446	0.445	0.439
310.745	0.373	0.403	0.418	0.418	0.445	0.446	0.441
311.745	0.371	0.403	0.417	0.418	0.446	0.446	0.441
312.745	0.371	0.402	0.418	0.419	0.447	0.447	0.443
313.745	0.37	0.402	0.417	0.42	0.447	0.447	0.444
314.745	0.37	0.401	0.417	0.421	0.448	0.448	0.446
315.745	0.369	0.4	0.417	0.422	0.449	0.45	0.447
316.745	0.368	0.4	0.417	0.423	0.451	0.451	0.449
317.745	0.368	0.4	0.417	0.425	0.452	0.453	0.452
318.745	0.367	0.4	0.417	0.426	0.454	0.454	0.453
319.745	0.367	0.4	0.417	0.428	0.456	0.456	0.456
320.745	0.368	0.401	0.418	0.43	0.458	0.458	0.459
321.745	0.368	0.401	0.419	0.432	0.46	0.461	0.462
322.745	0.368	0.402	0.42	0.434	0.462	0.463	0.465
323.745	0.369	0.403	0.421	0.437	0.464	0.466	0.468
324.745	0.37	0.404	0.423	0.439	0.468	0.468	0.471
325.745	0.371	0.406	0.425	0.442	0.471	0.472	0.475
326.745	0.372	0.407	0.427	0.445	0.474	0.475	0.479
327.745	0.374	0.409	0.429	0.448	0.477	0.479	0.483
328.745	0.376	0.411	0.432	0.451	0.485	0.482	0.487
329.745	0.382	0.417	0.439	0.453	0.488	0.493	0.491
330.745	0.384	0.419	0.442	0.457	0.492	0.497	0.495
331.745	0.387	0.422	0.445	0.46	0.495	0.501	0.499
332.745	0.389	0.424	0.447	0.463	0.5	0.506	0.504
333.745	0.392	0.426	0.45	0.466	0.504	0.51	0.508
334.745	0.394	0.429	0.453	0.47	0.508	0.514	0.512
335.745	0.396	0.432	0.456	0.473	0.511	0.519	0.516
336.745	0.399	0.435	0.459	0.476	0.516	0.523	0.521
337.745	0.402	0.438	0.462	0.48	0.52	0.528	0.526
338.745	0.405	0.44	0.466	0.484	0.524	0.533	0.531
339.745	0.407	0.443	0.469	0.487	0.529	0.538	0.536
340.745	0.41	0.447	0.473	0.491	0.534	0.543	0.541
341.745	0.413	0.45	0.476	0.495	0.539	0.548	0.546
342.745	0.417	0.454	0.48	0.499	0.544	0.554	0.551
343.745	0.42	0.457	0.484	0.504	0.548	0.559	0.557
344.745	0.423	0.461	0.488	0.508	0.553	0.564	0.562
345.745	0.426	0.464	0.492	0.512	0.558	0.57	0.568
346.745	0.429	0.467	0.495	0.516	0.562	0.575	0.573
347.745	0.432	0.47	0.499	0.52	0.566	0.58	0.578
348.745	0.435	0.473	0.502	0.524	0.571	0.585	0.582
349.745	0.438	0.477	0.505	0.528	0.575	0.589	0.587
350.745	0.441	0.479	0.508	0.531	0.578	0.594	0.592
351.745	0.443	0.482	0.511	0.534	0.582	0.598	0.596
352.745	0.446	0.485	0.514	0.537	0.586	0.602	0.6
353.745	0.448	0.487	0.517	0.541	0.589	0.606	0.604
354.745	0.451	0.49	0.52	0.544	0.592	0.61	0.608
355.745	0.453	0.492	0.523	0.546	0.595	0.614	0.611
356.745	0.455	0.494	0.525	0.549	0.599	0.617	0.615
357.745	0.457	0.496	0.527	0.551	0.601	0.62	0.618
358.745	0.459	0.498	0.529	0.553	0.604	0.623	0.62
359.745	0.46	0.501	0.531	0.556	0.606	0.626	0.624
360.745	0.462	0.502	0.533	0.558	0.608	0.629	0.626
361.745	0.463	0.504	0.535	0.56	0.611	0.631	0.628
362.745	0.465	0.505	0.537	0.562	0.612	0.634	0.631
363.745	0.466	0.506	0.538	0.563	0.613	0.636	0.633
364.745	0.467	0.507	0.539	0.564	0.615	0.637	0.635
365.745	0.468	0.508	0.54	0.565	0.615	0.638	0.636
366.745	0.468	0.508	0.54	0.566	0.615	0.639	0.636
367.745	0.468	0.508	0.54	0.565	0.615	0.639	0.636
368.745	0.467	0.508	0.539	0.565	0.614	0.639	0.636
369.745	0.467	0.507	0.539	0.565	0.613	0.638	0.636
370.745	0.466	0.506	0.537	0.563	0.611	0.637	0.634
371.745	0.465	0.505	0.536	0.562	0.609	0.635	0.633
372.745	0.463	0.503	0.534	0.56	0.604	0.633	0.63
373.745	0.459	0.498	0.529	0.558	0.601	0.627	0.629
374.745	0.457	0.496	0.526	0.555	0.597	0.624	0.625
375.745	0.454	0.493	0.523	0.552	0.593	0.62	0.622
376.745	0.451	0.489	0.519	0.548	0.588	0.616	0.617
377.745	0.447	0.485	0.515	0.544	0.583	0.611	0.613
378.745	0.443	0.482	0.511	0.539	0.577	0.606	0.607
379.745	0.439	0.477	0.506	0.535	0.572	0.6	0.602
380.745	0.435	0.472	0.501	0.529	0.565	0.594	0.596
381.745	0.43	0.467	0.496	0.523	0.559	0.587	0.589
382.745	0.426	0.462	0.49	0.517	0.552	0.581	0.582
383.745	0.42	0.456	0.484	0.511	0.544	0.573	0.575
384.745	0.415	0.45	0.478	0.504	0.536	0.565	0.567
385.745	0.409	0.444	0.471	0.497	0.528	0.557	0.559
386.745	0.403	0.437	0.464	0.49	0.519	0.548	0.55
387.745	0.396	0.43	0.456	0.482	0.51	0.539	0.541
388.745	0.389	0.423	0.448	0.474	0.501	0.53	0.532
389.745	0.382	0.415	0.44	0.465	0.491	0.52	0.522
390.745	0.375	0.407	0.432	0.456	0.481	0.51	0.512
391.745	0.367	0.399	0.424	0.447	0.471	0.5	0.502
392.745	0.36	0.391	0.415	0.438	0.461	0.489	0.491
393.745	0.353	0.383	0.406	0.429	0.45	0.478	0.48
394.745	0.344	0.375	0.397	0.419	0.44	0.467	0.469
395.745	0.337	0.366	0.388	0.409	0.429	0.456	0.458
396.745	0.329	0.358	0.379	0.4	0.418	0.445	0.447
397.745	0.32	0.349	0.37	0.39	0.407	0.433	0.436
398.745	0.312	0.34	0.36	0.38	0.396	0.422	0.424
399.745	0.304	0.331	0.351	0.37	0.385	0.41	0.412
400.745	0.296	0.322	0.341	0.359	0.374	0.398	0.401
401.745	0.287	0.314	0.332	0.349	0.362	0.387	0.389
402.745	0.279	0.304	0.322	0.339	0.351	0.375	0.377
403.745	0.27	0.296	0.312	0.329	0.34	0.363	0.365
404.745	0.262	0.287	0.303	0.319	0.33	0.352	0.354
405.745	0.254	0.278	0.294	0.309	0.319	0.341	0.342
406.745	0.246	0.269	0.285	0.299	0.308	0.329	0.331
407.745	0.238	0.26	0.275	0.289	0.297	0.318	0.319
408.745	0.23	0.252	0.266	0.279	0.287	0.307	0.308
409.745	0.222	0.244	0.257	0.27	0.276	0.296	0.297
410.745	0.214	0.235	0.248	0.26	0.267	0.285	0.286
411.745	0.207	0.228	0.24	0.251	0.257	0.275	0.276
412.745	0.2	0.22	0.232	0.242	0.247	0.264	0.266
413.745	0.192	0.212	0.223	0.233	0.238	0.254	0.255
414.745	0.186	0.205	0.216	0.225	0.229	0.245	0.246
415.745	0.179	0.197	0.208	0.216	0.221	0.235	0.236
416.745	0.172	0.19	0.2	0.209	0.212	0.226	0.227
417.745	0.166	0.184	0.193	0.201	0.204	0.217	0.218
418.745	0.16	0.177	0.186	0.194	0.196	0.209	0.209
419.745	0.153	0.171	0.179	0.186	0.189	0.2	0.201
420.745	0.148	0.165	0.172	0.179	0.182	0.192	0.193
421.745	0.143	0.159	0.166	0.173	0.175	0.185	0.186
422.745	0.138	0.153	0.16	0.166	0.168	0.178	0.178
423.745	0.133	0.148	0.155	0.16	0.162	0.171	0.171
424.745	0.128	0.143	0.149	0.154	0.155	0.164	0.165
425.745	0.123	0.138	0.144	0.149	0.15	0.158	0.158
426.745	0.119	0.133	0.139	0.144	0.144	0.152	0.153
427.745	0.115	0.129	0.134	0.138	0.139	0.146	0.147
428.745	0.111	0.125	0.13	0.134	0.134	0.141	0.141
429.745	0.107	0.121	0.126	0.129	0.129	0.135	0.136
430.745	0.103	0.116	0.121	0.124	0.125	0.13	0.131
431.745	0.1	0.113	0.118	0.12	0.12	0.125	0.126
432.745	0.097	0.11	0.114	0.116	0.116	0.121	0.122
433.745	0.094	0.106	0.11	0.112	0.112	0.117	0.117
434.745	0.091	0.103	0.107	0.109	0.108	0.113	0.113
435.745	0.088	0.1	0.104	0.105	0.105	0.109	0.11
436.745	0.086	0.098	0.101	0.102	0.102	0.105	0.106
437.745	0.084	0.095	0.099	0.099	0.099	0.102	0.103
438.745	0.081	0.092	0.096	0.096	0.096	0.099	0.1
439.745	0.079	0.09	0.093	0.094	0.094	0.096	0.097
440.745	0.077	0.088	0.091	0.091	0.091	0.093	0.094
441.745	0.075	0.086	0.089	0.089	0.089	0.091	0.092
442.745	0.073	0.084	0.087	0.087	0.087	0.088	0.089
443.745	0.072	0.083	0.085	0.085	0.085	0.086	0.087
444.745	0.07	0.081	0.083	0.083	0.083	0.084	0.085
445.745	0.069	0.079	0.082	0.081	0.081	0.082	0.083
446.745	0.067	0.078	0.08	0.079	0.079	0.08	0.081
447.745	0.066	0.076	0.078	0.077	0.078	0.079	0.079
448.745	0.065	0.075	0.077	0.076	0.076	0.077	0.078
449.745	0.064	0.074	0.076	0.075	0.075	0.075	0.076
450.745	0.062	0.073	0.075	0.073	0.073	0.074	0.075
451.745	0.061	0.071	0.073	0.072	0.072	0.072	0.074
452.745	0.06	0.07	0.072	0.071	0.071	0.071	0.072
453.745	0.059	0.069	0.071	0.07	0.07	0.07	0.071
454.745	0.058	0.068	0.07	0.069	0.068	0.069	0.07
455.745	0.057	0.067	0.069	0.067	0.067	0.067	0.069
456.745	0.056	0.066	0.068	0.066	0.066	0.066	0.067
457.745	0.055	0.065	0.067	0.065	0.065	0.065	0.066
458.745	0.054	0.064	0.066	0.064	0.064	0.064	0.065
459.745	0.054	0.063	0.065	0.063	0.063	0.063	0.064
460.745	0.053	0.062	0.064	0.062	0.062	0.062	0.063
461.745	0.052	0.061	0.063	0.061	0.061	0.061	0.062
462.745	0.051	0.061	0.062	0.06	0.06	0.06	0.061
463.745	0.05	0.06	0.061	0.06	0.059	0.059	0.06
464.745	0.049	0.059	0.06	0.059	0.058	0.058	0.059
465.745	0.049	0.058	0.06	0.058	0.058	0.057	0.059
466.745	0.048	0.057	0.059	0.057	0.057	0.057	0.058
467.745	0.047	0.057	0.058	0.056	0.056	0.056	0.057
468.745	0.046	0.056	0.057	0.056	0.055	0.055	0.056
469.745	0.046	0.055	0.056	0.055	0.054	0.054	0.055
470.745	0.045	0.055	0.056	0.054	0.054	0.053	0.054
471.745	0.044	0.054	0.055	0.053	0.053	0.053	0.054
472.745	0.044	0.053	0.054	0.053	0.052	0.052	0.053
473.745	0.043	0.052	0.054	0.052	0.051	0.051	0.052
474.745	0.043	0.052	0.053	0.051	0.051	0.05	0.052
475.745	0.042	0.051	0.052	0.05	0.05	0.05	0.051
476.745	0.041	0.051	0.052	0.05	0.05	0.049	0.05
477.745	0.041	0.05	0.051	0.05	0.049	0.049	0.05
478.745	0.04	0.05	0.051	0.049	0.048	0.048	0.049
479.745	0.04	0.049	0.05	0.048	0.048	0.047	0.048
480.745	0.039	0.048	0.049	0.047	0.047	0.046	0.048
481.745	0.039	0.048	0.049	0.047	0.046	0.046	0.047
482.745	0.038	0.047	0.048	0.046	0.046	0.045	0.046
483.745	0.038	0.047	0.047	0.046	0.045	0.044	0.046
484.745	0.037	0.046	0.047	0.045	0.044	0.044	0.045
485.745	0.036	0.045	0.046	0.044	0.044	0.043	0.044
486.745	0.036	0.045	0.045	0.044	0.043	0.043	0.044
487.745	0.035	0.044	0.045	0.043	0.042	0.042	0.043
488.745	0.035	0.044	0.045	0.043	0.042	0.041	0.043
489.745	0.034	0.043	0.044	0.042	0.041	0.041	0.042
490.745	0.034	0.042	0.043	0.041	0.041	0.04	0.041
491.745	0.033	0.042	0.043	0.041	0.04	0.04	0.041
492.745	0.033	0.042	0.042	0.04	0.041	0.039	0.04
493.745	0.034	0.043	0.044	0.041	0.04	0.04	0.041
494.745	0.034	0.042	0.043	0.04	0.04	0.039	0.04
495.745	0.033	0.042	0.042	0.04	0.039	0.038	0.04
496.745	0.032	0.041	0.042	0.039	0.039	0.038	0.039
497.745	0.032	0.041	0.041	0.039	0.038	0.037	0.039
498.745	0.032	0.04	0.041	0.038	0.038	0.037	0.038
499.745	0.031	0.04	0.04	0.038	0.037	0.036	0.038
500.745	0.031	0.04	0.04	0.038	0.037	0.036	0.037
501.745	0.031	0.039	0.04	0.037	0.037	0.035	0.037
502.745	0.03	0.039	0.039	0.037	0.036	0.035	0.037
503.745	0.03	0.039	0.039	0.037	0.036	0.035	0.036
504.745	0.03	0.038	0.039	0.036	0.036	0.034	0.036
505.745	0.029	0.038	0.038	0.036	0.035	0.034	0.036
506.745	0.029	0.038	0.038	0.036	0.035	0.034	0.035
507.745	0.029	0.038	0.038	0.035	0.035	0.033	0.035
508.745	0.028	0.037	0.037	0.035	0.034	0.033	0.034
509.745	0.028	0.037	0.037	0.035	0.034	0.033	0.034
510.745	0.027	0.036	0.036	0.034	0.033	0.032	0.034
511.745	0.027	0.036	0.036	0.034	0.033	0.032	0.033
512.745	0.027	0.035	0.036	0.033	0.033	0.031	0.033
513.745	0.026	0.035	0.035	0.033	0.032	0.031	0.032
514.745	0.026	0.035	0.035	0.032	0.031	0.03	0.032
515.745	0.025	0.034	0.034	0.032	0.031	0.03	0.031
516.745	0.025	0.034	0.033	0.031	0.031	0.029	0.031
517.745	0.024	0.033	0.033	0.031	0.03	0.029	0.03
518.745	0.023	0.032	0.032	0.03	0.03	0.028	0.029
519.745	0.023	0.032	0.032	0.03	0.029	0.028	0.029
520.745	0.022	0.032	0.031	0.03	0.029	0.028	0.029
521.745	0.022	0.031	0.031	0.029	0.028	0.027	0.028
522.745	0.022	0.031	0.031	0.029	0.028	0.027	0.028
523.745	0.022	0.03	0.03	0.028	0.028	0.027	0.028
524.745	0.022	0.03	0.03	0.028	0.028	0.026	0.027
525.745	0.022	0.03	0.03	0.028	0.027	0.026	0.027
526.745	0.022	0.03	0.03	0.028	0.027	0.026	0.027
527.745	0.022	0.03	0.03	0.028	0.027	0.026	0.027
528.745	0.022	0.03	0.03	0.027	0.027	0.026	0.027
529.745	0.022	0.03	0.03	0.027	0.027	0.026	0.027
530.745	0.022	0.03	0.03	0.027	0.026	0.025	0.027
531.745	0.022	0.03	0.03	0.027	0.026	0.025	0.027
532.745	0.022	0.03	0.03	0.027	0.026	0.025	0.027
533.745	0.022	0.029	0.03	0.027	0.026	0.025	0.027
534.745	0.022	0.029	0.03	0.026	0.026	0.024	0.027
535.745	0.022	0.029	0.029	0.026	0.026	0.024	0.026
536.745	0.022	0.029	0.029	0.026	0.025	0.024	0.026
537.745	0.021	0.029	0.029	0.026	0.025	0.024	0.026
538.745	0.021	0.029	0.029	0.026	0.025	0.024	0.026
539.745	0.021	0.028	0.029	0.026	0.025	0.024	0.026
540.745	0.021	0.028	0.029	0.026	0.024	0.023	0.026
541.745	0.021	0.028	0.028	0.026	0.024	0.023	0.026
542.745	0.02	0.028	0.028	0.026	0.024	0.023	0.026
543.745	0.02	0.028	0.028	0.025	0.024	0.023	0.026
544.745	0.02	0.027	0.028	0.025	0.024	0.023	0.025
545.745	0.02	0.027	0.028	0.025	0.024	0.023	0.025
546.745	0.02	0.027	0.027	0.025	0.024	0.022	0.025
547.745	0.02	0.027	0.027	0.025	0.024	0.022	0.025
548.745	0.02	0.027	0.027	0.025	0.023	0.022	0.025
549.745	0.019	0.027	0.027	0.025	0.023	0.022	0.025
550.745	0.019	0.027	0.027	0.025	0.023	0.022	0.025
551.745	0.019	0.026	0.027	0.025	0.023	0.022	0.025
552.745	0.019	0.026	0.026	0.025	0.023	0.022	0.025
553.745	0.019	0.026	0.026	0.025	0.023	0.021	0.025
554.745	0.019	0.026	0.026	0.024	0.022	0.021	0.024
555.745	0.018	0.026	0.026	0.024	0.022	0.021	0.024
556.745	0.018	0.026	0.026	0.024	0.022	0.021	0.024
557.745	0.018	0.026	0.025	0.024	0.022	0.021	0.024
558.745	0.018	0.026	0.025	0.024	0.022	0.021	0.024
559.745	0.018	0.025	0.025	0.024	0.022	0.02	0.024
560.745	0.017	0.025	0.025	0.024	0.021	0.02	0.023
561.745	0.017	0.025	0.025	0.023	0.021	0.02	0.023
562.745	0.017	0.025	0.024	0.023	0.021	0.02	0.023
563.745	0.017	0.025	0.024	0.023	0.021	0.02	0.023
564.745	0.017	0.024	0.024	0.023	0.021	0.02	0.023
565.745	0.016	0.024	0.024	0.023	0.021	0.019	0.023
566.745	0.016	0.024	0.024	0.023	0.02	0.019	0.022
567.745	0.016	0.024	0.023	0.023	0.02	0.019	0.022
568.745	0.016	0.024	0.023	0.022	0.02	0.019	0.022
569.745	0.016	0.023	0.023	0.022	0.02	0.019	0.022
570.745	0.015	0.023	0.023	0.022	0.02	0.018	0.022
571.745	0.015	0.023	0.023	0.022	0.02	0.018	0.022
572.745	0.015	0.023	0.023	0.022	0.019	0.018	0.021
573.745	0.015	0.023	0.022	0.022	0.019	0.018	0.021
574.745	0.015	0.022	0.022	0.022	0.019	0.018	0.021
575.745	0.015	0.022	0.022	0.021	0.019	0.018	0.021
576.745	0.014	0.022	0.022	0.021	0.019	0.017	0.021
577.745	0.014	0.022	0.022	0.021	0.019	0.017	0.021
578.745	0.014	0.022	0.022	0.021	0.019	0.017	0.021
579.745	0.014	0.022	0.021	0.021	0.018	0.017	0.02
580.745	0.014	0.022	0.021	0.021	0.019	0.017	0.02
581.745	0.014	0.022	0.022	0.021	0.018	0.017	0.02
582.745	0.014	0.022	0.021	0.021	0.018	0.017	0.02
583.745	0.013	0.021	0.021	0.021	0.018	0.017	0.02
584.745	0.013	0.021	0.021	0.021	0.018	0.016	0.02
585.745	0.013	0.021	0.021	0.02	0.018	0.017	0.02
586.745	0.013	0.021	0.021	0.02	0.018	0.016	0.02
587.745	0.013	0.021	0.02	0.02	0.018	0.016	0.02
588.745	0.013	0.021	0.02	0.02	0.017	0.016	0.019
589.745	0.012	0.02	0.02	0.02	0.017	0.016	0.019
590.745	0.012	0.02	0.02	0.02	0.017	0.016	0.019
591.745	0.012	0.02	0.02	0.019	0.017	0.015	0.019
592.745	0.012	0.02	0.02	0.019	0.017	0.015	0.019
593.745	0.012	0.02	0.019	0.019	0.017	0.015	0.019
594.745	0.011	0.02	0.019	0.019	0.016	0.015	0.018
595.745	0.011	0.019	0.019	0.019	0.016	0.015	0.018
596.745	0.011	0.019	0.019	0.019	0.016	0.015	0.018
597.745	0.011	0.019	0.019	0.018	0.016	0.014	0.018
598.745	0.011	0.019	0.019	0.018	0.016	0.014	0.018
599.745	0.011	0.019	0.018	0.018	0.016	0.014	0.018
600.745	0.01	0.018	0.018	0.018	0.015	0.014	0.017
601.745	0.01	0.018	0.018	0.018	0.015	0.014	0.017
602.745	0.01	0.018	0.018	0.018	0.015	0.014	0.017
603.745	0.01	0.018	0.018	0.018	0.015	0.014	0.017
604.745	0.01	0.018	0.018	0.017	0.015	0.014	0.017
605.745	0.01	0.018	0.017	0.017	0.015	0.013	0.017
606.745	0.009	0.018	0.017	0.017	0.015	0.013	0.017
607.745	0.009	0.017	0.017	0.017	0.014	0.013	0.016
608.745	0.009	0.017	0.017	0.017	0.014	0.013	0.016
609.745	0.009	0.017	0.017	0.017	0.014	0.013	0.016
610.745	0.009	0.017	0.017	0.017	0.014	0.013	0.016
611.745	0.009	0.017	0.016	0.016	0.014	0.012	0.016
612.745	0.009	0.017	0.016	0.017	0.014	0.012	0.016
613.745	0.009	0.017	0.016	0.016	0.014	0.012	0.016
614.745	0.009	0.016	0.016	0.016	0.014	0.012	0.016
615.745	0.008	0.016	0.016	0.016	0.014	0.012	0.016
616.745	0.008	0.016	0.016	0.016	0.013	0.012	0.015
617.745	0.008	0.016	0.016	0.016	0.013	0.012	0.015
618.745	0.008	0.016	0.015	0.016	0.013	0.012	0.015
619.745	0.008	0.016	0.015	0.016	0.013	0.011	0.015
620.745	0.008	0.015	0.015	0.015	0.013	0.011	0.015
621.745	0.007	0.015	0.015	0.016	0.013	0.011	0.015
622.745	0.007	0.015	0.015	0.015	0.013	0.011	0.015
623.745	0.007	0.015	0.015	0.015	0.012	0.011	0.015
624.745	0.007	0.015	0.015	0.015	0.012	0.011	0.014
625.745	0.007	0.015	0.015	0.015	0.012	0.01	0.014
626.745	0.007	0.014	0.015	0.015	0.012	0.01	0.014
627.745	0.006	0.014	0.014	0.014	0.012	0.01	0.014
628.745	0.006	0.014	0.014	0.014	0.012	0.01	0.014
629.745	0.006	0.014	0.014	0.014	0.011	0.01	0.014
630.745	0.006	0.014	0.014	0.014	0.011	0.01	0.013
631.745	0.006	0.014	0.014	0.014	0.011	0.01	0.013
632.745	0.006	0.014	0.013	0.014	0.011	0.01	0.013
633.745	0.006	0.013	0.013	0.014	0.011	0.009	0.013
634.745	0.006	0.013	0.013	0.013	0.011	0.009	0.013
635.745	0.005	0.013	0.013	0.013	0.01	0.009	0.013
636.745	0.005	0.013	0.013	0.013	0.01	0.009	0.012
637.745	0.005	0.013	0.013	0.013	0.01	0.009	0.012
638.745	0.005	0.013	0.012	0.013	0.01	0.009	0.012
639.745	0.005	0.012	0.012	0.013	0.01	0.009	0.012
640.745	0.004	0.012	0.012	0.013	0.01	0.008	0.012
641.745	0.004	0.012	0.012	0.012	0.01	0.008	0.012
642.745	0.004	0.012	0.012	0.012	0.01	0.008	0.012
643.745	0.004	0.012	0.012	0.012	0.01	0.008	0.012
644.745	0.004	0.012	0.011	0.012	0.009	0.008	0.011
645.745	0.004	0.012	0.011	0.012	0.009	0.008	0.011
646.745	0.004	0.011	0.011	0.012	0.009	0.008	0.011
647.745	0.003	0.011	0.011	0.012	0.009	0.007	0.011
648.745	0.004	0.011	0.011	0.012	0.009	0.007	0.011
649.745	0.003	0.011	0.011	0.011	0.009	0.007	0.011
650.745	0.003	0.011	0.01	0.011	0.008	0.007	0.011
651.745	0.003	0.011	0.01	0.011	0.008	0.007	0.011
652.745	0.003	0.011	0.011	0.011	0.008	0.007	0.011
653.745	0.003	0.01	0.01	0.011	0.008	0.007	0.01
654.745	0.002	0.01	0.01	0.011	0.008	0.006	0.01
655.745	0.002	0.01	0.01	0.011	0.008	0.006	0.01
656.745	0.002	0.01	0.01	0.01	0.008	0.006	0.01
657.745	0.002	0.01	0.009	0.01	0.008	0.006	0.01
658.745	0.002	0.01	0.009	0.01	0.007	0.006	0.009
659.745	0.002	0.009	0.009	0.01	0.007	0.006	0.009
660.745	0.002	0.009	0.009	0.01	0.007	0.006	0.009
661.745	0.001	0.009	0.009	0.01	0.007	0.006	0.009
662.745	0.001	0.009	0.009	0.01	0.007	0.005	0.009
663.745	0.001	0.009	0.008	0.009	0.007	0.005	0.009
664.745	0.001	0.009	0.008	0.009	0.006	0.005	0.009
665.745	0.001	0.008	0.008	0.009	0.006	0.005	0.008
666.745	0.001	0.008	0.008	0.009	0.006	0.005	0.008
667.745	0.001	0.008	0.008	0.009	0.006	0.005	0.008
668.745	0.001	0.008	0.008	0.009	0.006	0.005	0.008
669.745	0.001	0.008	0.007	0.009	0.006	0.004	0.008
670.745	0.001	0.008	0.007	0.009	0.006	0.004	0.008
671.745	0	0.008	0.007	0.008	0.006	0.004	0.008
672.745	0	0.007	0.007	0.008	0.006	0.004	0.007
673.745	0	0.007	0.007	0.008	0.005	0.004	0.007
674.745	0	0.007	0.007	0.008	0.005	0.004	0.007
675.745	0	0.007	0.006	0.008	0.005	0.004	0.007
676.745	0	0.007	0.006	0.008	0.005	0.004	0.007
677.745	0	0.007	0.006	0.008	0.005	0.003	0.007
678.745	-0.001	0.006	0.006	0.007	0.005	0.003	0.007
679.745	-0.001	0.006	0.006	0.007	0.004	0.003	0.007
680.745	-0.001	0.006	0.006	0.007	0.004	0.003	0.006
681.745	-0.001	0.006	0.006	0.007	0.004	0.003	0.006
682.745	-0.001	0.006	0.006	0.007	0.004	0.003	0.006
683.745	-0.001	0.006	0.005	0.007	0.004	0.002	0.006
684.745	-0.002	0.005	0.005	0.006	0.004	0.002	0.006
685.745	-0.002	0.005	0.005	0.006	0.003	0.002	0.006
686.745	-0.002	0.005	0.005	0.006	0.004	0.002	0.006
687.745	-0.002	0.005	0.005	0.006	0.003	0.002	0.006
688.745	-0.002	0.005	0.005	0.006	0.003	0.002	0.005
689.745	-0.002	0.005	0.004	0.006	0.003	0.002	0.005
690.745	-0.002	0.005	0.004	0.006	0.003	0.002	0.005
691.745	-0.002	0.005	0.004	0.006	0.003	0.002	0.005
692.745	-0.002	0.005	0.004	0.006	0.003	0.002	0.005
693.745	-0.002	0.004	0.004	0.006	0.003	0.001	0.005
694.745	-0.003	0.004	0.004	0.006	0.003	0.001	0.005
695.745	-0.003	0.004	0.004	0.005	0.002	0.001	0.005
696.745	-0.003	0.004	0.004	0.005	0.002	0.001	0.004
697.745	-0.003	0.004	0.003	0.005	0.002	0.001	0.004
698.745	-0.003	0.004	0.003	0.005	0.002	0.001	0.004
699.745	-0.003	0.004	0.003	0.005	0.002	0.001	0.004
700.745	-0.003	0.003	0.003	0.005	0.002	0	0.004
701.745	-0.003	0.003	0.003	0.005	0.002	0.001	0.004
702.745	-0.004	0.003	0.002	0.004	0.002	0	0.004
703.745	-0.004	0.003	0.002	0.004	0.001	0	0.004
704.745	-0.004	0.003	0.002	0.004	0.001	0	0.004
705.745	-0.004	0.003	0.002	0.004	0.001	0	0.003
706.745	-0.004	0.002	0.002	0.004	0.001	0	0.003
707.745	-0.004	0.002	0.002	0.004	0.001	0	0.003
708.745	-0.004	0.002	0.002	0.004	0.001	0	0.003
709.745	-0.005	0.002	0.002	0.004	0.001	-0.001	0.003
710.745	-0.005	0.002	0.001	0.003	0.001	-0.001	0.002
711.745	-0.005	0.002	0.001	0.003	0	-0.001	0.003
712.745	-0.005	0.002	0.001	0.003	0	-0.001	0.002
713.745	-0.005	0.001	0.001	0.003	0	-0.001	0.002
714.745	-0.006	0.001	0.001	0.003	0	-0.001	0.002
715.745	-0.006	0.001	0.001	0.003	0	-0.001	0.002
716.745	-0.006	0.001	0.001	0.002	0.005	-0.001	0.002
717.745	-0.002	0.006	0.006	0.005	0.005	0.005	0.005
718.745	-0.002	0.006	0.006	0.005	0.005	0.005	0.005
719.745	-0.002	0.006	0.006	0.005	0.005	0.005	0.005
720.745	-0.002	0.006	0.006	0.005	0.005	0.005	0.005
721.745	-0.002	0.006	0.006	0.005	0.005	0.005	0.005
722.745	-0.002	0.006	0.006	0.005	0.004	0.005	0.005
723.745	-0.003	0.005	0.005	0.004	0.004	0.004	0.004
724.745	-0.002	0.005	0.005	0.004	0.004	0.004	0.004
725.745	-0.003	0.005	0.004	0.004	0.004	0.004	0.004
726.745	-0.003	0.005	0.004	0.004	0.003	0.004	0.004
727.745	-0.004	0.004	0.004	0.004	0.003	0.003	0.003
728.745	-0.004	0.004	0.004	0.003	0.003	0.003	0.003
729.745	-0.004	0.004	0.003	0.003	0.003	0.003	0.003
730.745	-0.004	0.003	0.003	0.003	0.003	0.003	0.003
731.745	-0.004	0.004	0.003	0.003	0.003	0.003	0.003
732.745	-0.004	0.003	0.003	0.003	0.002	0.003	0.003
733.745	-0.004	0.003	0.003	0.003	0.002	0.003	0.003
734.745	-0.004	0.003	0.003	0.003	0.002	0.002	0.003
735.745	-0.004	0.003	0.003	0.003	0.002	0.002	0.003
736.745	-0.004	0.003	0.003	0.003	0.002	0.002	0.002
737.745	-0.004	0.003	0.003	0.003	0.002	0.002	0.002
738.745	-0.004	0.003	0.003	0.002	0.002	0.002	0.002
739.745	-0.004	0.003	0.002	0.002	0.002	0.002	0.002
740.745	-0.004	0.003	0.002	0.002	0.002	0.002	0.002
741.745	-0.004	0.002	0.003	0.002	0.002	0.002	0.002
742.745	-0.004	0.003	0.002	0.002	0.002	0.002	0.002
743.745	-0.004	0.002	0.002	0.002	0.002	0.002	0.002
744.745	-0.004	0.002	0.002	0.002	0.001	0.002	0.002
745.745	-0.004	0.002	0.002	0.001	0.001	0.001	0.001
746.745	-0.005	0.002	0.002	0.001	0.001	0.001	0.001
747.745	-0.004	0.002	0.002	0.001	0.001	0.001	0.001
748.745	-0.004	0.002	0.001	0.001	0.001	0.001	0.001
749.745	-0.003	0.001	0.001	0.001	0.001	0.001	0.001
750.745	0.001	0.001	0.001	0.001	0.001	0.001	0.001
751.745	0	0.001	0.001	0.001	0	0	0.001
752.745	0	0.001	0	0.001	0	0	0
753.745	0	0.001	0	0.001	0	0	0
754.745	0	0	0	0.001	0	0	0
755.745	0	0	0	0	0	0	0
756.745	0	0	0	0		0	0

## Sheet: Figure S14(c)
365	60	365	51	365	46	365	32	365	29	365	34
366	61	366	51	366	47	366	37	366	31	366	47
367	54	367	48	367	54	367	27	367	32	367	22
368	66	368	56	368	43	368	33	368	37	368	28
369	77	369	54	369	52	369	35	369	34	369	33
370	70	370	53	370	52	370	32	370	28	370	38
371	92	371	59	371	56	371	29	371	33	371	36
372	75	372	73	372	77	372	39	372	39	372	40
373	105	373	72	373	62	373	31	373	37	373	49
374	126	374	88	374	98	374	25	374	31	374	39
375	133	375	100	375	102	375	36	375	36	375	38
376	140	376	119	376	98	376	47	376	38	376	40
377	177	377	132	377	117	377	49	377	42	377	42
378	202	378	162	378	140	378	43	378	58	378	35
379	232	379	226	379	183	379	52	379	60	379	50
380	260	380	237	380	187	380	48	380	57	380	66
381	315	381	244	381	207	381	59	381	53	381	69
382	387	382	354	382	283	382	73	382	81	382	84
383	459	383	456	383	288	383	81	383	88	383	72
384	603	384	474	384	377	384	72	384	88	384	113
385	713	385	617	385	456	385	116	385	111	385	117
386	782	386	714	386	553	386	123	386	144	386	143
387	968	387	878	387	589	387	167	387	148	387	212
388	1147	388	982	388	814	388	198	388	217	388	221
389	1365	389	1256	389	892	389	250	389	224	389	282
390	1561	390	1422	390	1072	390	286	390	279	390	360
391	1840	391	1592	391	1281	391	375	391	355	391	461
392	2197	392	1948	392	1380	392	497	392	448	392	560
393	2567	393	2217	393	1757	393	569	393	614	393	670
394	2924	394	2669	394	1949	394	757	394	733	394	767
395	3385	395	2984	395	2350	395	894	395	957	395	920
396	3849	396	3419	396	2701	396	1117	396	1090	396	1088
397	4368	397	3939	397	3001	397	1372	397	1348	397	1361
398	4906	398	4461	398	3389	398	1629	398	1620	398	1634
399	5555	399	5032	399	3939	399	2004	399	1933	399	1918
400	6240	400	5380	400	4443	400	2399	400	2314	400	2218
401	6801	401	6288	401	4957	401	2783	401	2622	401	2573
402	7670	402	6885	402	5463	402	3225	402	3109	402	2967
403	8547	403	7585	403	6142	403	3779	403	3585	403	3282
404	9313	404	8326	404	6673	404	4137	404	4059	404	3770
405	10191	405	9100	405	7580	405	4781	405	4527	405	4239
406	10665	406	9769	406	8126	406	5386	406	5082	406	4720
407	11637	407	10541	407	8646	407	6047	407	5598	407	5231
408	12464	408	11440	408	9575	408	6573	408	6205	408	5800
409	13258	409	12094	409	10138	409	7200	409	6846	409	6102
410	14073	410	12833	410	10841	410	7857	410	7363	410	6765
411	15203	411	13606	411	11601	411	8557	411	7946	411	7220
412	15659	412	14428	412	12265	412	9067	412	8585	412	7514
413	16580	413	15280	413	13343	413	9791	413	9060	413	8223
414	17484	414	16155	414	13789	414	10231	414	9651	414	8589
415	18243	415	16807	415	14460	415	10841	415	10057	415	9134
416	19025	416	17438	416	15141	416	11351	416	10756	416	9490
417	19930	417	18677	417	15685	417	12269	417	11337	417	10086
418	20543	418	18875	418	16270	418	12776	418	11792	418	10444
419	21294	419	19592	419	17186	419	13176	419	12536	419	11012
420	21927	420	20643	420	17754	420	13866	420	12647	420	11427
421	23137	421	21074	421	18381	421	14545	421	13287	421	11745
422	23857	422	21555	422	19046	422	14830	422	13618	422	12049
423	23938	423	21899	423	19694	423	15361	423	14143	423	12604
424	24687	424	22676	424	20005	424	15867	424	14552	424	12868
425	25250	425	23597	425	20885	425	16160	425	14972	425	13334
426	25623	426	23870	426	21010	426	16818	426	15402	426	13605
427	26947	427	24546	427	21783	427	17290	427	15957	427	13918
428	26890	428	24652	428	22464	428	17623	428	16208	428	14259
429	27531	429	25505	429	22512	429	18112	429	16440	429	14534
430	28010	430	25835	430	22996	430	18366	430	16920	430	14750
431	28639	431	26224	431	23507	431	18447	431	17224	431	15150
432	28743	432	27124	432	23895	432	19017	432	17456	432	15420
433	29041	433	27078	433	24394	433	19324	433	18006	433	15795
434	29743	434	27711	434	24415	434	19769	434	17988	434	15688
435	29705	435	27677	435	25064	435	19786	435	18472	435	16149
436	30344	436	27663	436	25291	436	20127	436	18787	436	16325
437	30502	437	27937	437	25354	437	20238	437	18616	437	16439
438	30537	438	28677	438	25739	438	20421	438	18909	438	16494
439	30674	439	28428	439	25954	439	20931	439	19321	439	16531
440	30661	440	28402	440	25915	440	20902	440	19435	440	16728
441	30971	441	28673	441	25992	441	21079	441	19611	441	17369
442	31153	442	29383	442	26241	442	21267	442	19931	442	16837
443	31161	443	29121	443	26414	443	21329	443	19644	443	17365
444	31261	444	29199	444	26343	444	21071	444	19878	444	17239
445	31239	445	29068	445	26664	445	21483	445	20078	445	17675
446	31257	446	29266	446	26514	446	21424	446	19812	446	17405
447	31039	447	28984	447	26809	447	21744	447	20209	447	17359
448	31177	448	28686	448	26539	448	21698	448	20154	448	17346
449	31266	449	28435	449	26299	449	21513	449	20074	449	17178
450	30510	450	28792	450	26345	450	21506	450	19996	450	17556
451	30989	451	28433	451	26102	451	21586	451	19894	451	17155
452	30253	452	28484	452	26186	452	21561	452	19743	452	17379
453	30233	453	28087	453	25575	453	21497	453	19676	453	17273
454	30052	454	27812	454	25584	454	21031	454	19591	454	17186
455	29692	455	27330	455	25368	455	21126	455	19545	455	16650
456	29515	456	27383	456	25137	456	20676	456	19341	456	16825
457	29155	457	27127	457	24644	457	20559	457	19472	457	16739
458	28528	458	26843	458	24764	458	20549	458	18796	458	16427
459	28225	459	26541	459	24491	459	20388	459	18842	459	16363
460	27780	460	26229	460	24044	460	19897	460	18891	460	16017
461	27656	461	25748	461	23699	461	19703	461	18228	461	15670
462	27291	462	25283	462	23525	462	19526	462	18003	462	15811
463	27006	463	24662	463	23328	463	19481	463	17941	463	15576
464	26662	464	24670	464	22752	464	19088	464	17795	464	15328
465	26068	465	24263	465	22444	465	18839	465	17390	465	15031
466	25516	466	23927	466	22740	466	18323	466	17280	466	14986
467	25132	467	23659	467	21838	467	18262	467	16996	467	14608
468	24786	468	23329	468	21137	468	17550	468	16683	468	14402
469	24221	469	22246	469	20849	469	17567	469	16468	469	14249
470	23588	470	21984	470	20530	470	17348	470	15928	470	13856
471	23170	471	21942	471	20056	471	16699	471	15797	471	13551
472	22451	472	20832	472	19664	472	16691	472	15367	472	13423
473	22449	473	20837	473	19403	473	16477	473	15242	473	13122
474	21657	474	20458	474	18723	474	15784	474	15115	474	12919
475	21426	475	19775	475	18488	475	15871	475	14569	475	12824
476	20719	476	19545	476	18220	476	15437	476	14471	476	12258
477	20393	477	19017	477	17724	477	15035	477	13952	477	12201
478	19797	478	18567	478	17531	478	14883	478	13641	478	11792
479	19511	479	18076	479	17157	479	14651	479	13447	479	11716
480	18755	480	18076	480	16732	480	14352	480	13171	480	11496
481	18473	481	17603	481	16164	481	14134	481	12832	481	11281
482	18341	482	17020	482	15805	482	13575	482	12502	482	10932
483	17574	483	16659	483	15360	483	13231	483	11952	483	10628
484	17333	484	16291	484	15245	484	12924	484	11749	484	10569
485	16962	485	15591	485	15051	485	12892	485	11968	485	10160
486	16697	486	15417	486	14395	486	12534	486	11326	486	9871
487	16095	487	15100	487	14309	487	12195	487	11264	487	9713
488	15581	488	14397	488	13806	488	11822	488	10917	488	9501
489	15543	489	14575	489	13606	489	11409	489	10671	489	9171
490	14921	490	14051	490	12905	490	11144	490	10543	490	9026
491	14464	491	13549	491	12887	491	10996	491	10073	491	8731
492	14026	492	13325	492	12467	492	10802	492	10009	492	8618
493	13778	493	12935	493	11987	493	10408	493	10025	493	8464
494	13393	494	12391	494	11748	494	10064	494	9350	494	8028
495	13042	495	12142	495	11495	495	9910	495	9319	495	7959
496	12578	496	11738	496	11160	496	9557	496	8982	496	7577
497	12429	497	11233	497	10514	497	9236	497	8799	497	7626
498	12233	498	11074	498	10591	498	9124	498	8524	498	7238
499	11719	499	10747	499	10107	499	8827	499	8302	499	7098
500	11174	500	10559	500	9907	500	8763	500	8058	500	6901
501	10991	501	10079	501	9549	501	8525	501	7759	501	6642
502	10312	502	9905	502	9387	502	8088	502	7443	502	6646
503	10268	503	9469	503	8897	503	7962	503	7230	503	6234
504	9953	504	9218	504	8559	504	7576	504	7028	504	6150
505	9577	505	8909	505	8572	505	7466	505	6837	505	5731
506	9285	506	8757	506	7993	506	7165	506	6631	506	5854
507	9142	507	8375	507	7812	507	6872	507	6330	507	5604
508	8781	508	8030	508	7713	508	6894	508	6408	508	5526
509	8536	509	7924	509	7415	509	6418	509	6046	509	5151
510	8182	510	7655	510	7234	510	6398	510	5937	510	5099
511	7938	511	7372	511	7056	511	6283	511	5760	511	5036
512	7762	512	7221	512	6668	512	6040	512	5596	512	4936
513	7342	513	6952	513	6556	513	5784	513	5274	513	4633
514	7090	514	6815	514	6463	514	5619	514	5210	514	4523
515	7112	515	6317	515	6140	515	5468	515	5097	515	4374
516	6756	516	6189	516	6149	516	5340	516	4790	516	4331
517	6583	517	6052	517	5885	517	5130	517	4793	517	4040
518	6465	518	5824	518	5528	518	4936	518	4640	518	3974
519	6232	519	5752	519	5303	519	4819	519	4388	519	3872
520	5946	520	5577	520	5139	520	4488	520	4337	520	3801
521	5702	521	5307	521	4960	521	4461	521	4202	521	3711
522	5499	522	5234	522	4804	522	4342	522	4097	522	3602
523	5421	523	5003	523	4660	523	4280	523	3772	523	3462
524	5169	524	4896	524	4546	524	4096	524	3861	524	3403
525	4883	525	4702	525	4441	525	3786	525	3637	525	3173
526	4921	526	4570	526	4192	526	3835	526	3488	526	3145
527	4649	527	4409	527	4156	527	3690	527	3446	527	3081
528	4579	528	4224	528	4044	528	3523	528	3328	528	2902
529	4373	529	4090	529	3789	529	3299	529	3226	529	2791
530	4181	530	4013	530	3792	530	3345	530	2961	530	2715
531	4111	531	3906	531	3630	531	3232	531	2974	531	2560
532	3954	532	3731	532	3524	532	3133	532	2809	532	2434
533	3724	533	3519	533	3280	533	3016	533	2770	533	2440
534	3645	534	3538	534	3259	534	2756	534	2646	534	2404
535	3472	535	3280	535	3204	535	2794	535	2548	535	2296
536	3436	536	3181	536	3052	536	2639	536	2651	536	2303
537	3344	537	3097	537	2930	537	2591	537	2486	537	2177
538	3212	538	2984	538	2799	538	2516	538	2325	538	2074
539	3007	539	2902	539	2723	539	2477	539	2197	539	1986
540	3124	540	2848	540	2614	540	2345	540	2152	540	1880
541	2784	541	2647	541	2551	541	2207	541	2068	541	1851
542	2662	542	2610	542	2467	542	2180	542	2063	542	1728
543	2618	543	2432	543	2343	543	2184	543	1967	543	1760
544	2565	544	2351	544	2294	544	2054	544	1943	544	1689
545	2472	545	2316	545	2207	545	1885	545	1816	545	1633
546	2439	546	2250	546	2154	546	1883	546	1758	546	1600
547	2287	547	2210	547	1964	547	1872	547	1753	547	1588
548	2221	548	2067	548	2031	548	1790	548	1724	548	1524
549	2105	549	1978	549	1864	549	1707	549	1603	549	1428
550	2134	550	1903	550	1785	550	1717	550	1569	550	1314
551	1972	551	1834	551	1757	551	1610	551	1475	551	1341
552	2008	552	1830	552	1701	552	1469	552	1454	552	1312
553	1858	553	1790	553	1614	553	1511	553	1402	553	1240
554	1840	554	1681	554	1569	554	1335	554	1364	554	1194
555	1779	555	1681	555	1536	555	1433	555	1303	555	1122
556	1740	556	1619	556	1483	556	1317	556	1257	556	1122
557	1617	557	1530	557	1444	557	1337	557	1221	557	1087
558	1534	558	1467	558	1379	558	1233	558	1129	558	1021
559	1533	559	1436	559	1332	559	1143	559	1168	559	994
560	1477	560	1330	560	1237	560	1169	560	1081	560	975
561	1418	561	1324	561	1214	561	1129	561	1099	561	989
562	1409	562	1331	562	1201	562	1073	562	1030	562	887
563	1247	563	1252	563	1240	563	1005	563	988	563	859
564	1249	564	1205	564	1174	564	962	564	985	564	918
565	1290	565	1161	565	1075	565	972	565	881	565	886
566	1263	566	1155	566	1136	566	927	566	882	566	829
567	1165	567	1133	567	1053	567	868	567	843	567	781
568	1157	568	1084	568	954	568	839	568	813	568	773
569	1082	569	956	569	933	569	846	569	781	569	675
570	1012	570	984	570	884	570	783	570	816	570	723
571	1017	571	946	571	861	571	829	571	730	571	683
572	981	572	932	572	881	572	756	572	711	572	703
573	909	573	917	573	851	573	763	573	674	573	667
574	974	574	885	574	845	574	729	574	687	574	621
575	890	575	859	575	750	575	683	575	681	575	590
576	869	576	808	576	757	576	623	576	671	576	597
577	866	577	810	577	764	577	641	577	660	577	592
578	758	578	743	578	684	578	615	578	590	578	555
579	823	579	710	579	687	579	559	579	562	579	559
580	799	580	724	580	678	580	593	580	576	580	558
581	734	581	701	581	636	581	553	581	579	581	526
582	712	582	675	582	585	582	533	582	526	582	440
583	744	583	664	583	541	583	543	583	497	583	461
584	700	584	655	584	599	584	511	584	495	584	448
585	652	585	618	585	624	585	514	585	453	585	437
586	581	586	570	586	544	586	454	586	467	586	433
587	589	587	603	587	541	587	493	587	473	587	448
588	581	588	538	588	525	588	443	588	453	588	410
589	600	589	538	589	533	589	461	589	422	589	406
590	563	590	514	590	467	590	421	590	394	590	352
591	551	591	527	591	501	591	406	591	389	591	337
592	535	592	472	592	435	592	398	592	372	592	409
593	498	593	453	593	437	593	370	593	358	593	324
594	495	594	457	594	426	594	405	594	383	594	344
595	491	595	443	595	417	595	383	595	364	595	321
596	457	596	412	596	396	596	335	596	372	596	336
597	438	597	422	597	397	597	328	597	344	597	319
598	446	598	374	598	365	598	395	598	352	598	288
599	421	599	413	599	368	599	368	599	315	599	279
600	379	600	340	600	372	600	350	600	308	600	282
601	390	601	351	601	334	601	294	601	271	601	297
602	382	602	399	602	361	602	341	602	285	602	269
603	342	603	324	603	346	603	293	603	282	603	266
604	356	604	335	604	350	604	298	604	271	604	283
605	323	605	312	605	317	605	230	605	287	605	259
606	308	606	305	606	291	606	273	606	243	606	226
607	377	607	316	607	298	607	238	607	228	607	242
608	329	608	318	608	314	608	253	608	256	608	233
609	297	609	308	609	281	609	256	609	222	609	239
610	254	610	265	610	275	610	237	610	213	610	230
611	270	611	265	611	254	611	217	611	214	611	223
612	277	612	264	612	260	612	243	612	245	612	196
613	280	613	250	613	283	613	213	613	218	613	201
614	281	614	263	614	234	614	188	614	181	614	182
615	277	615	254	615	233	615	192	615	196	615	167
616	238	616	244	616	212	616	198	616	181	616	155
617	258	617	217	617	218	617	194	617	205	617	157
618	228	618	232	618	209	618	172	618	173	618	176
619	234	619	228	619	207	619	168	619	166	619	166
620	244	620	229	620	195	620	161	620	177	620	164
621	216	621	186	621	172	621	151	621	170	621	136
622	211	622	218	622	186	622	160	622	137	622	135
623	200	623	191	623	175	623	122	623	144	623	153
624	204	624	201	624	194	624	143	624	151	624	144
625	203	625	175	625	156	625	150	625	146	625	138
626	172	626	190	626	170	626	153	626	117	626	128
627	160	627	169	627	141	627	117	627	154	627	124
628	195	628	194	628	142	628	128	628	156	628	123
629	154	629	175	629	152	629	124	629	134	629	103
630	142	630	160	630	134	630	156	630	130	630	136
631	161	631	141	631	138	631	143	631	128	631	110
632	149	632	136	632	152	632	124	632	122	632	99
633	152	633	162	633	137	633	116	633	101	633	112
634	153	634	130	634	127	634	107	634	105	634	101
635	147	635	158	635	126	635	106	635	119	635	95
636	154	636	146	636	129	636	113	636	109	636	108
637	117	637	119	637	143	637	129	637	107	637	99
638	145	638	124	638	112	638	119	638	110	638	102
639	115	639	121	639	133	639	99	639	77	639	82
640	119	640	125	640	105	640	91	640	92	640	104
641	115	641	124	641	114	641	110	641	110	641	88
642	120	642	123	642	111	642	84	642	104	642	83
643	122	643	123	643	122	643	101	643	109	643	79
644	102	644	125	644	114	644	107	644	71	644	72
645	105	645	93	645	116	645	100	645	85	645	89
646	126	646	118	646	99	646	80	646	86	646	91
647	104	647	109	647	106	647	87	647	86	647	98
648	95	648	103	648	105	648	90	648	97	648	78
649	127	649	103	649	104	649	91	649	84	649	82
650	94	650	93	650	93	650	88	650	72	650	72
651	85	651	104	651	101	651	95	651	74	651	79
652	128	652	84	652	88	652	60	652	73	652	74
653	96	653	110	653	91	653	79	653	71	653	77
654	102	654	95	654	98	654	72	654	78	654	66
655	99	655	97	655	71	655	70	655	59	655	71
656	88	656	82	656	96	656	67	656	68	656	62
657	71	657	102	657	93	657	81	657	47	657	68
658	92	658	93	658	81	658	77	658	61	658	60
659	80	659	80	659	79	659	65	659	62	659	63
660	76	660	71	660	77	660	53	660	73	660	72
661	81	661	90	661	66	661	62	661	56	661	60
662	74	662	71	662	82	662	69	662	67	662	55
663	66	663	59	663	69	663	57	663	58	663	58
664	67	664	69	664	77	664	59	664	59	664	58
665	74	665	72	665	68	665	60	665	78	665	55
666	74	666	60	666	75	666	70	666	66	666	60
667	63	667	62	667	83	667	54	667	59	667	50
668	51	668	67	668	69	668	49	668	49	668	52
669	39	669	67	669	67	669	52	669	46	669	61
670	73	670	70	670	53	670	53	670	43	670	50
671	68	671	63	671	64	671	48	671	60	671	54
672	52	672	73	672	63	672	45	672	55	672	56
673	66	673	64	673	70	673	40	673	49	673	64
674	62	674	44	674	55	674	44	674	55	674	48
675	74	675	49	675	63	675	51	675	48	675	49
676	61	676	59	676	52	676	47	676	48	676	45
677	53	677	58	677	68	677	43	677	54	677	31
678	60	678	66	678	53	678	53	678	39	678	32
679	46	679	56	679	50	679	55	679	41	679	45
680	62	680	61	680	58	680	41	680	40	680	48

## Sheet: Figure S15(d)
365	42	365	50	365	72	365	49	365	40	365	46
366	54	366	39	366	43	366	52	366	52	366	59
367	40	367	52	367	67	367	52	367	41	367	52
368	54	368	62	368	57	368	50	368	53	368	50
369	59	369	62	369	60	369	70	369	53	369	66
370	70	370	61	370	59	370	45	370	54	370	44
371	66	371	52	371	64	371	63	371	71	371	42
372	66	372	61	372	65	372	65	372	60	372	64
373	68	373	73	373	65	373	62	373	81	373	69
374	101	374	84	374	66	374	99	374	80	374	90
375	114	375	95	375	85	375	110	375	79	375	92
376	136	376	117	376	125	376	119	376	106	376	105
377	143	377	144	377	122	377	137	377	128	377	120
378	141	378	141	378	170	378	156	378	165	378	120
379	213	379	209	379	183	379	181	379	160	379	150
380	240	380	219	380	183	380	185	380	210	380	188
381	308	381	274	381	263	381	253	381	271	381	217
382	361	382	328	382	308	382	311	382	323	382	248
383	415	383	380	383	356	383	363	383	329	383	295
384	506	384	438	384	420	384	448	384	451	384	397
385	608	385	550	385	543	385	504	385	537	385	464
386	781	386	690	386	632	386	659	386	625	386	491
387	861	387	808	387	698	387	737	387	729	387	654
388	1032	388	915	388	931	388	916	388	861	388	763
389	1190	389	1090	389	1034	389	1048	389	1016	389	917
390	1573	390	1299	390	1269	390	1224	390	1237	390	1025
391	1758	391	1560	391	1472	391	1427	391	1438	391	1273
392	1968	392	1745	392	1739	392	1631	392	1673	392	1423
393	2368	393	2100	393	2047	393	1912	393	2001	393	1650
394	2761	394	2439	394	2327	394	2318	394	2197	394	1901
395	3133	395	2774	395	2845	395	2650	395	2687	395	2218
396	3556	396	3196	396	3025	396	2999	396	2844	396	2529
397	3991	397	3631	397	3690	397	3531	397	3376	397	2990
398	4626	398	4249	398	4031	398	3834	398	3764	398	3314
399	5208	399	4781	399	4552	399	4397	399	4368	399	3911
400	5866	400	5202	400	5199	400	5070	400	4933	400	4418
401	6410	401	5804	401	5687	401	5530	401	5489	401	4856
402	7132	402	6494	402	6344	402	6124	402	6126	402	5351
403	7937	403	7205	403	6981	403	6838	403	6517	403	5890
404	8582	404	7799	404	7834	404	7419	404	7245	404	6687
405	9341	405	8583	405	8349	405	8008	405	7805	405	7333
406	10198	406	9217	406	8968	406	8888	406	8797	406	7846
407	10953	407	10139	407	9731	407	9493	407	9338	407	8662
408	11725	408	10952	408	10515	408	10234	408	10205	408	9215
409	12554	409	11736	409	11097	409	10965	409	10721	409	10080
410	13490	410	12295	410	11957	410	11763	410	11534	410	10651
411	13995	411	13092	411	12898	411	12720	411	12178	411	11309
412	15021	412	13752	412	13527	412	13253	412	12903	412	12241
413	15574	413	14573	413	14131	413	13908	413	13624	413	12616
414	16591	414	15315	414	15188	414	14879	414	14424	414	13563
415	17387	415	15984	415	15971	415	15731	415	15292	415	14193
416	17930	416	17157	416	16462	416	16050	416	15926	416	15010
417	18776	417	17465	417	17001	417	16784	417	16539	417	15542
418	19170	418	18243	418	17958	418	17556	418	17151	418	16236
419	20261	419	18760	419	18629	419	18223	419	17844	419	16826
420	21055	420	19561	420	19114	420	18926	420	18495	420	17556
421	21324	421	19914	421	19615	421	19407	421	19159	421	18334
422	22153	422	20481	422	20289	422	20226	422	19610	422	18632
423	22748	423	21456	423	20802	423	20867	423	20188	423	19392
424	23296	424	21971	424	21504	424	21105	424	20909	424	20003
425	24064	425	22388	425	21871	425	21764	425	21410	425	20532
426	24262	426	23194	426	22484	426	22165	426	21970	426	21142
427	24672	427	23745	427	23223	427	22484	427	22549	427	21518
428	25483	428	23901	428	23406	428	23254	428	22747	428	21905
429	25913	429	24451	429	23863	429	23914	429	23050	429	22380
430	26157	430	24850	430	24196	430	23928	430	24116	430	23113
431	26730	431	25327	431	24841	431	24943	431	23933	431	23137
432	27106	432	25600	432	25168	432	25081	432	24611	432	23839
433	27200	433	26040	433	25738	433	25212	433	24977	433	24032
434	27707	434	26395	434	25723	434	25659	434	25247	434	24289
435	27535	435	26618	435	26072	435	25841	435	25402	435	24663
436	28018	436	27067	436	26277	436	25929	436	25749	436	25193
437	28636	437	27244	437	26616	437	26317	437	25859	437	25339
438	28783	438	27518	438	26530	438	26921	438	26326	438	25395
439	29057	439	27446	439	26822	439	27100	439	26573	439	25844
440	29270	440	27811	440	27459	440	26935	440	26822	440	25958
441	28907	441	27567	441	27406	441	27385	441	26897	441	26137
442	29270	442	27838	442	27291	442	27599	442	26838	442	25768
443	29394	443	28197	443	27754	443	27181	443	27047	443	26260
444	29515	444	27820	444	27535	444	27308	444	27417	444	26320
445	29856	445	27945	445	27624	445	27587	445	27096	445	26457
446	29636	446	28110	446	27583	446	27455	446	27393	446	26398
447	29379	447	27967	447	27951	447	27634	447	26949	447	26314
448	29302	448	27978	448	27350	448	27218	448	26959	448	26309
449	29213	449	27820	449	27462	449	26866	449	26857	449	26277
450	29106	450	27577	450	27323	450	27245	450	26696	450	26438
451	28838	451	27491	451	26912	451	26834	451	26666	451	25820
452	28588	452	27399	452	26905	452	27320	452	26527	452	25393
453	28452	453	27225	453	27058	453	26798	453	26157	453	25665
454	28116	454	27061	454	26766	454	26832	454	26280	454	25634
455	28130	455	26723	455	26220	455	26210	455	25735	455	25346
456	27699	456	26230	456	25978	456	25926	456	25467	456	25312
457	27288	457	26048	457	25471	457	25887	457	25804	457	24731
458	27167	458	25749	458	25290	458	25124	458	24995	458	24478
459	26881	459	25553	459	25304	459	24920	459	24983	459	24385
460	26647	460	25221	460	25141	460	24871	460	24694	460	23930
461	25819	461	25068	461	24356	461	24440	461	23984	461	23742
462	25580	462	24755	462	24269	462	24388	462	23739	462	23375
463	25258	463	24166	463	23961	463	24128	463	23553	463	22906
464	25059	464	23900	464	23546	464	23187	464	23605	464	22951
465	24643	465	23450	465	23372	465	22923	465	22755	465	22363
466	24109	466	23070	466	22842	466	22681	466	22201	466	21830
467	23625	467	22842	467	22176	467	22108	467	22075	467	21610
468	23112	468	22089	468	21581	468	21872	468	21457	468	21208
469	22571	469	21964	469	21446	469	21321	469	20970	469	20554
470	22561	470	21293	470	20849	470	21046	470	20773	470	20456
471	21753	471	21018	471	20778	471	20598	471	20493	471	19842
472	21391	472	20701	472	19947	472	20162	472	20022	472	19494
473	20793	473	20389	473	19821	473	19957	473	19548	473	19360
474	20724	474	19755	474	19377	474	19453	474	19067	474	19082
475	20148	475	19464	475	18810	475	19069	475	18743	475	18426
476	19923	476	19074	476	18870	476	18507	476	18416	476	18238
477	19129	477	18417	477	18036	477	18365	477	18019	477	17746
478	18799	478	18010	478	17798	478	17771	478	17691	478	17457
479	18375	479	17688	479	17308	479	17480	479	17259	479	17142
480	18027	480	17002	480	17141	480	17063	480	16782	480	16599
481	17577	481	16911	481	16751	481	16645	481	16816	481	16236
482	17223	482	16563	482	16400	482	16232	482	16297	482	15727
483	16820	483	15948	483	16153	483	15956	483	15677	483	15481
484	16518	484	15568	484	15660	484	15789	484	15422	484	15269
485	16066	485	15300	485	15067	485	15190	485	14921	485	14738
486	15613	486	14950	486	14957	486	14960	486	14598	486	14250
487	15237	487	14689	487	14345	487	14368	487	14207	487	13939
488	14923	488	14428	488	13912	488	14175	488	13970	488	13527
489	14507	489	14039	489	13710	489	13772	489	13670	489	13349
490	14113	490	13596	490	13311	490	13333	490	13026	490	13045
491	13711	491	12946	491	13152	491	13186	491	12958	491	12433
492	13253	492	12927	492	12886	492	12536	492	12507	492	12275
493	12870	493	12562	493	12357	493	12352	493	12142	493	11953
494	12565	494	12161	494	12144	494	12189	494	12085	494	11645
495	12394	495	11719	495	11652	495	11467	495	11491	495	11537
496	12014	496	11543	496	11288	496	11426	496	11121	496	11026
497	11662	497	11159	497	10931	497	10949	497	10790	497	10548
498	11258	498	10705	498	10695	498	10715	498	10480	498	10372
499	10788	499	10594	499	10232	499	10294	499	10214	499	10159
500	10626	500	10267	500	10116	500	9941	500	9976	500	9590
501	10182	501	9869	501	9854	501	9939	501	9944	501	9575
502	10003	502	9551	502	9389	502	9590	502	9600	502	9201
503	9609	503	9380	503	9231	503	9068	503	9157	503	8817
504	9178	504	8829	504	8695	504	9050	504	8595	504	8637
505	8863	505	8717	505	8788	505	8622	505	8380	505	8369
506	8991	506	8472	506	8402	506	8399	506	8261	506	8016
507	8425	507	8162	507	8104	507	8227	507	7965	507	7921
508	8209	508	8032	508	7737	508	7840	508	7781	508	7552
509	7921	509	7728	509	7732	509	7525	509	7521	509	7448
510	7764	510	7464	510	7414	510	7731	510	7309	510	7122
511	7402	511	7133	511	7211	511	7014	511	7281	511	6833
512	7268	512	7101	512	6945	512	6945	512	6829	512	6700
513	6984	513	6722	513	6768	513	6758	513	6692	513	6621
514	6789	514	6643	514	6507	514	6370	514	6397	514	6335
515	6532	515	6366	515	6362	515	6471	515	6122	515	5998
516	6433	516	6174	516	6023	516	6167	516	6066	516	5964
517	6213	517	6004	517	5945	517	6059	517	5766	517	5597
518	5785	518	5847	518	5610	518	5748	518	5507	518	5573
519	5778	519	5560	519	5511	519	5552	519	5449	519	5502
520	5671	520	5520	520	5373	520	5343	520	5330	520	5236
521	5358	521	5225	521	5087	521	5144	521	5126	521	4901
522	5116	522	5034	522	5147	522	4978	522	4976	522	4889
523	5100	523	4852	523	4900	523	4826	523	4873	523	4724
524	5060	524	4850	524	4684	524	4744	524	4457	524	4526
525	4752	525	4514	525	4512	525	4475	525	4439	525	4333
526	4602	526	4433	526	4340	526	4386	526	4407	526	4343
527	4488	527	4217	527	4085	527	4256	527	4099	527	4006
528	4275	528	4157	528	4092	528	4141	528	4129	528	3948
529	4006	529	4018	529	3882	529	4021	529	3829	529	3889
530	4157	530	3940	530	3796	530	3822	530	3839	530	3723
531	3847	531	3831	531	3678	531	3596	531	3682	531	3520
532	3648	532	3495	532	3527	532	3451	532	3543	532	3501
533	3638	533	3479	533	3493	533	3396	533	3375	533	3373
534	3366	534	3366	534	3296	534	3321	534	3337	534	3203
535	3303	535	3235	535	3169	535	3245	535	3165	535	3111
536	3230	536	3130	536	3074	536	3097	536	3074	536	2929
537	3183	537	3007	537	2941	537	2978	537	2953	537	2885
538	3172	538	2913	538	2845	538	2945	538	2865	538	2770
539	2835	539	2791	539	2735	539	2832	539	2717	539	2704
540	2749	540	2708	540	2643	540	2682	540	2693	540	2499
541	2714	541	2573	541	2577	541	2573	541	2438	541	2468
542	2589	542	2576	542	2545	542	2410	542	2459	542	2413
543	2421	543	2491	543	2392	543	2352	543	2383	543	2338
544	2386	544	2382	544	2294	544	2363	544	2233	544	2141
545	2366	545	2282	545	2277	545	2211	545	2232	545	2215
546	2268	546	2220	546	2187	546	2130	546	2096	546	2182
547	2181	547	2250	547	2154	547	2144	547	2067	547	2036
548	2065	548	2086	548	1991	548	2082	548	1974	548	2023
549	2050	549	1953	549	1880	549	1961	549	1881	549	1856
550	1997	550	1874	550	1829	550	1866	550	1825	550	1853
551	1944	551	1842	551	1803	551	1828	551	1772	551	1719
552	1820	552	1788	552	1722	552	1811	552	1786	552	1664
553	1723	553	1755	553	1615	553	1675	553	1737	553	1600
554	1681	554	1730	554	1692	554	1621	554	1635	554	1617
555	1660	555	1592	555	1665	555	1565	555	1563	555	1551
556	1612	556	1580	556	1522	556	1538	556	1568	556	1491
557	1500	557	1472	557	1467	557	1436	557	1445	557	1473
558	1490	558	1445	558	1383	558	1482	558	1437	558	1414
559	1495	559	1376	559	1424	559	1369	559	1347	559	1341
560	1404	560	1369	560	1314	560	1325	560	1321	560	1314
561	1310	561	1294	561	1308	561	1298	561	1283	561	1193
562	1286	562	1233	562	1205	562	1230	562	1229	562	1195
563	1219	563	1245	563	1182	563	1258	563	1190	563	1120
564	1158	564	1173	564	1142	564	1171	564	1091	564	1183
565	1207	565	1167	565	1142	565	1078	565	1101	565	1075
566	1136	566	1095	566	1098	566	1063	566	1102	566	1021
567	1125	567	1049	567	1084	567	1000	567	1023	567	1047
568	1074	568	1091	568	1020	568	996	568	1053	568	956
569	1027	569	1016	569	958	569	954	569	1022	569	953
570	1023	570	945	570	901	570	927	570	951	570	943
571	964	571	953	571	881	571	918	571	898	571	898
572	949	572	908	572	853	572	896	572	864	572	837
573	926	573	927	573	890	573	920	573	828	573	843
574	838	574	806	574	783	574	816	574	798	574	831
575	825	575	840	575	817	575	757	575	810	575	805
576	805	576	819	576	788	576	763	576	675	576	783
577	788	577	752	577	778	577	720	577	759	577	713
578	812	578	753	578	712	578	716	578	711	578	746
579	730	579	716	579	706	579	675	579	697	579	741
580	726	580	647	580	673	580	667	580	694	580	651
581	725	581	661	581	669	581	669	581	673	581	615
582	673	582	672	582	645	582	619	582	625	582	599
583	619	583	657	583	650	583	578	583	661	583	583
584	626	584	588	584	599	584	557	584	585	584	580
585	619	585	632	585	602	585	579	585	581	585	584
586	654	586	600	586	557	586	604	586	554	586	579
587	573	587	575	587	566	587	560	587	577	587	559
588	578	588	533	588	558	588	595	588	579	588	515
589	539	589	540	589	498	589	504	589	523	589	533
590	482	590	496	590	469	590	512	590	516	590	487
591	523	591	480	591	499	591	522	591	530	591	477
592	546	592	452	592	499	592	479	592	439	592	475
593	470	593	484	593	495	593	506	593	415	593	467
594	460	594	456	594	434	594	479	594	441	594	403
595	462	595	445	595	431	595	447	595	397	595	421
596	453	596	414	596	436	596	426	596	427	596	406
597	392	597	408	597	424	597	437	597	384	597	378
598	425	598	405	598	409	598	410	598	387	598	389
599	414	599	375	599	382	599	398	599	393	599	321
600	394	600	378	600	368	600	362	600	338	600	358
601	386	601	364	601	358	601	323	601	367	601	351
602	321	602	349	602	367	602	393	602	328	602	397
603	365	603	322	603	317	603	364	603	329	603	334
604	347	604	315	604	355	604	331	604	356	604	324
605	340	605	309	605	324	605	309	605	305	605	294
606	319	606	323	606	318	606	312	606	281	606	280
607	311	607	268	607	317	607	280	607	290	607	306
608	284	608	331	608	310	608	293	608	307	608	261
609	305	609	268	609	281	609	277	609	284	609	284
610	276	610	286	610	270	610	269	610	256	610	289
611	270	611	238	611	266	611	299	611	231	611	282
612	274	612	240	612	228	612	261	612	258	612	231
613	299	613	241	613	237	613	222	613	221	613	238
614	264	614	247	614	255	614	221	614	239	614	225
615	213	615	217	615	234	615	221	615	244	615	232
616	229	616	243	616	233	616	215	616	224	616	230
617	228	617	232	617	227	617	219	617	198	617	204
618	249	618	206	618	188	618	228	618	210	618	201
619	222	619	214	619	198	619	204	619	190	619	176
620	202	620	204	620	190	620	203	620	195	620	172
621	198	621	189	621	176	621	188	621	207	621	170
622	209	622	184	622	185	622	189	622	189	622	159
623	179	623	167	623	188	623	175	623	172	623	193
624	181	624	180	624	171	624	184	624	174	624	167
625	180	625	149	625	187	625	182	625	163	625	164
626	197	626	157	626	177	626	174	626	179	626	166
627	193	627	175	627	156	627	168	627	179	627	201
628	177	628	164	628	180	628	153	628	157	628	155
629	159	629	164	629	170	629	147	629	156	629	129
630	154	630	148	630	152	630	162	630	144	630	153
631	141	631	145	631	138	631	143	631	142	631	121
632	129	632	136	632	140	632	151	632	133	632	115
633	141	633	137	633	146	633	144	633	168	633	115
634	148	634	140	634	137	634	137	634	120	634	141
635	125	635	141	635	108	635	131	635	129	635	153
636	124	636	117	636	154	636	147	636	132	636	145
637	129	637	132	637	133	637	119	637	125	637	140
638	127	638	122	638	118	638	119	638	128	638	117
639	134	639	110	639	122	639	112	639	106	639	127
640	116	640	95	640	105	640	122	640	108	640	112
641	116	641	99	641	116	641	110	641	106	641	108
642	118	642	126	642	105	642	133	642	105	642	107
643	122	643	104	643	101	643	108	643	110	643	116
644	107	644	109	644	95	644	85	644	105	644	91
645	115	645	97	645	115	645	115	645	93	645	100
646	100	646	102	646	103	646	120	646	101	646	98
647	92	647	120	647	96	647	106	647	100	647	111
648	104	648	113	648	95	648	99	648	104	648	109
649	109	649	90	649	93	649	89	649	96	649	96
650	100	650	106	650	89	650	98	650	103	650	84
651	104	651	92	651	81	651	102	651	95	651	98
652	85	652	84	652	112	652	71	652	93	652	93
653	85	653	94	653	82	653	85	653	93	653	94
654	88	654	88	654	80	654	78	654	92	654	115
655	78	655	81	655	87	655	80	655	78	655	77
656	88	656	107	656	64	656	75	656	77	656	99
657	92	657	93	657	96	657	78	657	67	657	73
658	93	658	83	658	76	658	83	658	90	658	76
659	88	659	77	659	82	659	70	659	80	659	73
660	97	660	92	660	77	660	78	660	72	660	71
661	76	661	66	661	57	661	92	661	74	661	87
662	91	662	84	662	58	662	81	662	82	662	78
663	85	663	83	663	66	663	75	663	73	663	88
664	75	664	85	664	74	664	66	664	62	664	64
665	84	665	62	665	77	665	61	665	53	665	66
666	57	666	90	666	62	666	79	666	56	666	68
667	65	667	74	667	82	667	81	667	73	667	74
668	68	668	61	668	66	668	64	668	73	668	69
669	78	669	63	669	67	669	68	669	63	669	60
670	67	670	66	670	52	670	62	670	55	670	64
671	74	671	57	671	69	671	66	671	79	671	60
672	46	672	53	672	65	672	79	672	53	672	61
673	59	673	75	673	59	673	59	673	71	673	53
674	54	674	58	674	61	674	67	674	66	674	71
675	63	675	72	675	50	675	55	675	59	675	61
676	50	676	52	676	54	676	51	676	63	676	61
677	65	677	63	677	57	677	65	677	72	677	72
678	54	678	58	678	51	678	57	678	50	678	56
679	69	679	59	679	62	679	59	679	50	679	43
680	60	680	63	680	64	680	50	680	39	680	65
