# Supplementary material for: In-depth chiral sensing capability of C-dots in a biomimetic protein-based hydrogel: a probe for chiral recognition applications
Source: Royal Society of Chemistry journal article supplement (doi:10.1039/d5bm01508a), 2026-01-01
Supplement: d5bm01508a1.zip [file Figure S15.xlsx]

## Sheet: Figure S15 (a)
365	78	365	99	365	70	365	43	365	60	365	36
366	71	366	74	366	56	366	37	366	61	366	39
367	65	367	89	367	65	367	48	367	54	367	47
368	77	368	94	368	61	368	48	368	66	368	63
369	94	369	95	369	65	369	42	369	77	369	52
370	96	370	95	370	81	370	49	370	70	370	54
371	101	371	110	371	77	371	49	371	92	371	68
372	102	372	95	372	97	372	54	372	75	372	60
373	120	373	127	373	82	373	60	373	105	373	59
374	123	374	152	374	98	374	59	374	126	374	79
375	175	375	180	375	135	375	67	375	133	375	93
376	172	376	204	376	153	376	72	376	140	376	73
377	217	377	241	377	170	377	93	377	177	377	81
378	237	378	270	378	196	378	92	378	202	378	104
379	275	379	272	379	231	379	107	379	232	379	127
380	317	380	394	380	259	380	105	380	260	380	134
381	456	381	432	381	322	381	120	381	315	381	165
382	428	382	490	382	363	382	174	382	387	382	227
383	599	383	604	383	447	383	185	383	459	383	249
384	729	384	754	384	495	384	217	384	603	384	308
385	779	385	949	385	593	385	270	385	713	385	351
386	982	386	1102	386	710	386	322	386	782	386	438
387	1136	387	1276	387	841	387	366	387	968	387	537
388	1360	388	1487	388	1039	388	465	388	1147	388	649
389	1645	389	1707	389	1170	389	535	389	1365	389	746
390	1933	390	2126	390	1408	390	639	390	1561	390	902
391	2354	391	2392	391	1640	391	772	391	1840	391	1150
392	2641	392	2955	392	1887	392	925	392	2197	392	1288
393	3292	393	3347	393	2290	393	1124	393	2567	393	1614
394	3664	394	3876	394	2708	394	1369	394	2924	394	1868
395	4281	395	4419	395	3196	395	1521	395	3385	395	2063
396	4850	396	5180	396	3740	396	1799	396	3849	396	2521
397	5685	397	5775	397	4192	397	2125	397	4368	397	2918
398	6351	398	6556	398	4932	398	2379	398	4906	398	3317
399	7173	399	7227	399	5493	399	2819	399	5555	399	4009
400	8352	400	8100	400	6027	400	3201	400	6240	400	4330
401	8975	401	8997	401	7158	401	3522	401	6801	401	5040
402	10044	402	9956	402	7643	402	4182	402	7670	402	5590
403	11005	403	10977	403	8441	403	4516	403	8547	403	6042
404	12212	404	11938	404	9352	404	5058	404	9313	404	6876
405	13181	405	12894	405	10245	405	5475	405	10191	405	7648
406	14336	406	13846	406	11044	406	6046	406	10665	406	8291
407	15573	407	15211	407	12037	407	6472	407	11637	407	8966
408	16504	408	16424	408	13220	408	7162	408	12464	408	9809
409	17992	409	17584	409	14089	409	7538	409	13258	409	10469
410	18919	410	18451	410	15030	410	8218	410	14073	410	10942
411	20220	411	19643	411	16287	411	8763	411	15203	411	11999
412	21350	412	20619	412	17024	412	9426	412	15659	412	12714
413	22450	413	21835	413	17798	413	9907	413	16580	413	13433
414	23471	414	22749	414	18735	414	10276	414	17484	414	14407
415	24774	415	23579	415	19832	415	10753	415	18243	415	14799
416	26235	416	25020	416	20832	416	11369	416	19025	416	15375
417	26924	417	25728	417	21529	417	12084	417	19930	417	16289
418	28163	418	27101	418	22647	418	12350	418	20543	418	16613
419	29486	419	27833	419	23227	419	12735	419	21294	419	17432
420	30303	420	28571	420	24089	420	13261	420	21927	420	18004
421	31503	421	29400	421	25304	421	13875	421	23137	421	18634
422	32232	422	30868	422	25736	422	14219	422	23857	422	19340
423	33098	423	31595	423	26836	423	14778	423	23938	423	19812
424	34546	424	32124	424	27455	424	15371	424	24687	424	20365
425	35397	425	33076	425	28338	425	15836	425	25250	425	21151
426	35992	426	33836	426	28864	426	16059	426	25623	426	21775
427	36998	427	34523	427	29379	427	16204	427	26947	427	22267
428	37785	428	35049	428	30040	428	16739	428	26890	428	22449
429	38673	429	35790	429	30780	429	17306	429	27531	429	23129
430	39306	430	36776	430	31587	430	17305	430	28010	430	23539
431	39853	431	36789	431	32151	431	18001	431	28639	431	23789
432	40590	432	37665	432	32744	432	17830	432	28743	432	23879
433	41585	433	38226	433	33369	433	18385	433	29041	433	24627
434	41459	434	38885	434	33714	434	18673	434	29743	434	24725
435	42452	435	38347	435	34075	435	18633	435	29705	435	24920
436	43104	436	39259	436	34259	436	19185	436	30344	436	25298
437	43416	437	39627	437	34753	437	19376	437	30502	437	25565
438	43687	438	40047	438	35122	438	19656	438	30537	438	26003
439	44397	439	40341	439	35603	439	19640	439	30674	439	26292
440	44888	440	40334	440	35967	440	20001	440	30661	440	26146
441	44567	441	40860	441	36260	441	20104	441	30971	441	26406
442	45580	442	40856	442	36034	442	20057	442	31153	442	26714
443	45892	443	40782	443	36530	443	20420	443	31161	443	27023
444	45581	444	41205	444	36549	444	20330	444	31261	444	27127
445	45913	445	41153	445	37074	445	20515	445	31239	445	26924
446	46122	446	41529	446	37284	446	21049	446	31257	446	27059
447	46226	447	41280	447	36954	447	20644	447	31039	447	26923
448	46156	448	41513	448	37151	448	20593	448	31177	448	26886
449	46070	449	41309	449	37027	449	20639	449	31266	449	26635
450	46143	450	40814	450	36850	450	20482	450	30510	450	27043
451	45843	451	41327	451	36941	451	20738	451	30989	451	26157
452	46218	452	40632	452	36867	452	20596	452	30253	452	26572
453	45583	453	40397	453	36777	453	20554	453	30233	453	26152
454	45018	454	40302	454	36371	454	20478	454	30052	454	26354
455	44779	455	39537	455	35988	455	20262	455	29692	455	25778
456	44533	456	39045	456	35780	456	19908	456	29515	456	25560
457	44648	457	39050	457	35744	457	19938	457	29155	457	25528
458	44115	458	38621	458	35177	458	19923	458	28528	458	25135
459	43498	459	38095	459	34755	459	19486	459	28225	459	24948
460	43363	460	37894	460	34135	460	19441	460	27780	460	24892
461	42703	461	37595	461	34260	461	18857	461	27656	461	24504
462	42149	462	36527	462	33738	462	18750	462	27291	462	23890
463	41612	463	36652	463	33638	463	18433	463	27006	463	23559
464	41412	464	35805	464	32524	464	18550	464	26662	464	23257
465	40717	465	35395	465	32741	465	18119	465	26068	465	22825
466	39842	466	34880	466	31996	466	17827	466	25516	466	22714
467	39431	467	34256	467	31598	467	17503	467	25132	467	22343
468	38796	468	33521	468	31092	468	17383	468	24786	468	21934
469	37975	469	32937	469	30436	469	16955	469	24221	469	21323
470	37196	470	32028	470	29764	470	16723	470	23588	470	21281
471	36816	471	31451	471	29201	471	16562	471	23170	471	20597
472	36229	472	31263	472	28639	472	16072	472	22451	472	20134
473	35311	473	30615	473	28248	473	15776	473	22449	473	19903
474	34686	474	30052	474	27929	474	15735	474	21657	474	19568
475	33817	475	29447	475	27616	475	15298	475	21426	475	19417
476	33679	476	28699	476	26742	476	14865	476	20719	476	18899
477	32707	477	28370	477	26313	477	15145	477	20393	477	18055
478	32789	478	27774	478	25895	478	14154	478	19797	478	17793
479	31359	479	26915	479	24969	479	14154	479	19511	479	17367
480	30647	480	26757	480	24857	480	13979	480	18755	480	17387
481	30450	481	25689	481	24396	481	13647	481	18473	481	17002
482	29628	482	25187	482	23796	482	13319	482	18341	482	16435
483	29209	483	24791	483	23231	483	12995	483	17574	483	16258
484	28513	484	24203	484	22887	484	12687	484	17333	484	15893
485	27987	485	23670	485	22230	485	12361	485	16962	485	15581
486	27490	486	23223	486	21852	486	12220	486	16697	486	14829
487	26839	487	22468	487	21256	487	12008	487	16095	487	14606
488	25960	488	22028	488	20679	488	11447	488	15581	488	14283
489	25556	489	21727	489	20284	489	11567	489	15543	489	13944
490	24638	490	20822	490	19881	490	11157	490	14921	490	13576
491	24385	491	20568	491	19105	491	11015	491	14464	491	13332
492	23603	492	20095	492	19006	492	10732	492	14026	492	13083
493	22811	493	19291	493	18342	493	10146	493	13778	493	12484
494	22491	494	18855	494	17929	494	10096	494	13393	494	12179
495	22016	495	18144	495	17638	495	9863	495	13042	495	11926
496	21586	496	17961	496	16930	496	9500	496	12578	496	11368
497	20994	497	17366	497	16633	497	9308	497	12429	497	11185
498	20337	498	17365	498	16303	498	9028	498	12233	498	10822
499	19521	499	16557	499	15694	499	8717	499	11719	499	10854
500	18991	500	15948	500	15457	500	8453	500	11174	500	10298
501	18622	501	15685	501	14801	501	8333	501	10991	501	9929
502	18072	502	15257	502	14294	502	8101	502	10312	502	9622
503	17489	503	14532	503	14060	503	7874	503	10268	503	9448
504	17029	504	14173	504	13553	504	7605	504	9953	504	9193
505	16549	505	13877	505	13128	505	7311	505	9577	505	8874
506	16283	506	13245	506	12641	506	7178	506	9285	506	8820
507	15410	507	12920	507	12368	507	6940	507	9142	507	8306
508	15239	508	12671	508	11986	508	6697	508	8781	508	8185
509	14556	509	12281	509	11742	509	6626	509	8536	509	7830
510	14213	510	11768	510	11378	510	6388	510	8182	510	7597
511	13920	511	11432	511	11131	511	6203	511	7938	511	7374
512	13399	512	10951	512	10764	512	6012	512	7762	512	6980
513	12909	513	10849	513	10494	513	5749	513	7342	513	6933
514	12622	514	10382	514	10116	514	5626	514	7090	514	6716
515	12302	515	10222	515	9692	515	5524	515	7112	515	6350
516	11911	516	9710	516	9358	516	5302	516	6756	516	6316
517	11564	517	9567	517	9391	517	5186	517	6583	517	6109
518	11175	518	9340	518	8891	518	4998	518	6465	518	6007
519	10765	519	8836	519	8773	519	4658	519	6232	519	5737
520	10691	520	8718	520	8202	520	4773	520	5946	520	5508
521	10114	521	8305	521	8235	521	4531	521	5702	521	5223
522	10099	522	8028	522	7742	522	4356	522	5499	522	5236
523	9632	523	7890	523	7685	523	4172	523	5421	523	5068
524	9255	524	7530	524	7306	524	4148	524	5169	524	4822
525	8893	525	7271	525	7195	525	3951	525	4883	525	4697
526	8723	526	7115	526	6882	526	3877	526	4921	526	4705
527	8513	527	6895	527	6636	527	3778	527	4649	527	4418
528	8227	528	6584	528	6495	528	3589	528	4579	528	4277
529	7915	529	6287	529	6264	529	3584	529	4373	529	4048
530	7754	530	6089	530	6006	530	3402	530	4181	530	3900
531	7454	531	6229	531	5799	531	3214	531	4111	531	3711
532	7221	532	5798	532	5610	532	3157	532	3954	532	3640
533	6807	533	5551	533	5372	533	3068	533	3724	533	3517
534	6821	534	5442	534	5318	534	2917	534	3645	534	3519
535	6686	535	5284	535	5117	535	2826	535	3472	535	3376
536	6249	536	5034	536	4914	536	2821	536	3436	536	3233
537	6114	537	4957	537	4901	537	2634	537	3344	537	3073
538	5960	538	4736	538	4548	538	2492	538	3212	538	3029
539	5845	539	4663	539	4481	539	2585	539	3007	539	2804
540	5463	540	4478	540	4330	540	2514	540	3124	540	2794
541	5333	541	4456	541	4274	541	2355	541	2784	541	2737
542	5063	542	4052	542	3909	542	2263	542	2662	542	2588
543	4995	543	3959	543	3839	543	2123	543	2618	543	2543
544	4978	544	3815	544	3734	544	2162	544	2565	544	2437
545	4838	545	3736	545	3668	545	2120	545	2472	545	2400
546	4552	546	3607	546	3460	546	2068	546	2439	546	2380
547	4270	547	3349	547	3531	547	1981	547	2287	547	2079
548	4169	548	3406	548	3257	548	1847	548	2221	548	2128
549	3969	549	3179	549	3161	549	1779	549	2105	549	2113
550	3956	550	3095	550	3070	550	1715	550	2134	550	1958
551	3870	551	2972	551	2906	551	1600	551	1972	551	1837
552	3726	552	2975	552	2976	552	1618	552	2008	552	1812
553	3542	553	2794	553	2779	553	1619	553	1858	553	1743
554	3440	554	2727	554	2682	554	1515	554	1840	554	1649
555	3493	555	2724	555	2668	555	1513	555	1779	555	1686
556	3226	556	2505	556	2531	556	1437	556	1740	556	1566
557	3091	557	2554	557	2368	557	1362	557	1617	557	1559
558	3037	558	2427	558	2402	558	1304	558	1534	558	1470
559	2915	559	2306	559	2214	559	1281	559	1533	559	1421
560	2883	560	2145	560	2168	560	1214	560	1477	560	1438
561	2818	561	2098	561	2139	561	1121	561	1418	561	1354
562	2583	562	2081	562	1971	562	1095	562	1409	562	1267
563	2631	563	2047	563	1980	563	1105	563	1247	563	1257
564	2548	564	1884	564	1943	564	1063	564	1249	564	1165
565	2404	565	1916	565	1906	565	1074	565	1290	565	1209
566	2265	566	1845	566	1818	566	1083	566	1263	566	1140
567	2258	567	1758	567	1665	567	929	567	1165	567	1093
568	2241	568	1730	568	1658	568	992	568	1157	568	1037
569	2112	569	1675	569	1691	569	904	569	1082	569	1067
570	2129	570	1549	570	1588	570	899	570	1012	570	1030
571	1958	571	1564	571	1602	571	847	571	1017	571	979
572	1966	572	1476	572	1496	572	795	572	981	572	969
573	1891	573	1422	573	1414	573	822	573	909	573	868
574	1815	574	1302	574	1416	574	792	574	974	574	888
575	1783	575	1356	575	1356	575	773	575	890	575	848
576	1630	576	1348	576	1297	576	751	576	869	576	798
577	1672	577	1292	577	1241	577	754	577	866	577	749
578	1555	578	1197	578	1217	578	692	578	758	578	800
579	1533	579	1248	579	1190	579	655	579	823	579	716
580	1482	580	1175	580	1119	580	613	580	799	580	760
581	1403	581	1122	581	1093	581	608	581	734	581	726
582	1430	582	1135	582	1042	582	649	582	712	582	656
583	1362	583	1097	583	1054	583	587	583	744	583	667
584	1336	584	1017	584	1015	584	565	584	700	584	634
585	1307	585	1054	585	1011	585	548	585	652	585	645
586	1275	586	967	586	932	586	491	586	581	586	604
587	1258	587	878	587	915	587	507	587	589	587	598
588	1230	588	885	588	878	588	490	588	581	588	549
589	1150	589	922	589	806	589	536	589	600	589	535
590	1152	590	838	590	802	590	501	590	563	590	526
591	1072	591	826	591	751	591	466	591	551	591	515
592	999	592	801	592	844	592	430	592	535	592	480
593	1074	593	730	593	755	593	485	593	498	593	480
594	1014	594	807	594	670	594	395	594	495	594	488
595	993	595	746	595	716	595	398	595	491	595	503
596	936	596	707	596	722	596	414	596	457	596	430
597	923	597	699	597	606	597	375	597	438	597	446
598	862	598	631	598	620	598	384	598	446	598	420
599	887	599	648	599	613	599	416	599	421	599	391
600	846	600	643	600	628	600	345	600	379	600	367
601	793	601	585	601	575	601	344	601	390	601	380
602	786	602	587	602	581	602	336	602	382	602	374
603	772	603	594	603	560	603	325	603	342	603	342
604	761	604	516	604	580	604	315	604	356	604	357
605	738	605	521	605	545	605	306	605	323	605	300
606	731	606	535	606	521	606	289	606	308	606	331
607	687	607	509	607	520	607	300	607	377	607	323
608	654	608	531	608	497	608	311	608	329	608	288
609	664	609	533	609	474	609	265	609	297	609	311
610	611	610	451	610	440	610	280	610	254	610	277
611	625	611	479	611	452	611	265	611	270	611	291
612	596	612	421	612	422	612	232	612	277	612	268
613	575	613	396	613	382	613	255	613	280	613	272
614	550	614	402	614	428	614	226	614	281	614	255
615	507	615	434	615	416	615	222	615	277	615	247
616	525	616	365	616	426	616	221	616	238	616	244
617	493	617	410	617	388	617	220	617	258	617	253
618	502	618	404	618	383	618	216	618	228	618	217
619	480	619	396	619	350	619	204	619	234	619	207
620	488	620	354	620	352	620	207	620	244	620	230
621	490	621	343	621	364	621	170	621	216	621	223
622	437	622	321	622	340	622	217	622	211	622	186
623	436	623	337	623	288	623	177	623	200	623	190
624	424	624	302	624	291	624	178	624	204	624	170
625	388	625	287	625	285	625	183	625	203	625	206
626	422	626	271	626	317	626	161	626	172	626	183
627	385	627	288	627	261	627	170	627	160	627	195
628	365	628	284	628	267	628	149	628	195	628	180
629	380	629	253	629	268	629	159	629	154	629	183
630	351	630	237	630	274	630	152	630	142	630	143
631	372	631	261	631	269	631	138	631	161	631	158
632	328	632	285	632	251	632	152	632	149	632	159
633	356	633	228	633	219	633	151	633	152	633	159
634	324	634	234	634	223	634	135	634	153	634	142
635	307	635	214	635	204	635	118	635	147	635	123
636	304	636	232	636	197	636	123	636	154	636	130
637	291	637	255	637	204	637	139	637	117	637	137
638	309	638	223	638	222	638	122	638	145	638	143
639	264	639	206	639	179	639	122	639	115	639	117
640	239	640	177	640	205	640	113	640	119	640	130
641	276	641	188	641	172	641	110	641	115	641	117
642	251	642	184	642	195	642	116	642	120	642	116
643	261	643	178	643	197	643	119	643	122	643	119
644	263	644	210	644	181	644	114	644	102	644	134
645	251	645	194	645	148	645	122	645	105	645	134
646	247	646	185	646	153	646	116	646	126	646	130
647	255	647	192	647	186	647	95	647	104	647	89
648	237	648	176	648	165	648	117	648	95	648	118
649	226	649	186	649	165	649	100	649	127	649	105
650	220	650	171	650	175	650	115	650	94	650	113
651	235	651	152	651	138	651	87	651	85	651	109
652	207	652	175	652	136	652	110	652	128	652	99
653	212	653	182	653	158	653	96	653	96	653	108
654	220	654	135	654	151	654	93	654	102	654	87
655	216	655	146	655	155	655	94	655	99	655	94
656	214	656	170	656	147	656	115	656	88	656	84
657	212	657	149	657	116	657	91	657	71	657	97
658	211	658	125	658	135	658	85	658	92	658	106
659	191	659	141	659	132	659	85	659	80	659	109
660	175	660	144	660	113	660	94	660	76	660	107
661	188	661	150	661	109	661	79	661	81	661	88
662	189	662	142	662	133	662	75	662	74	662	82
663	179	663	133	663	109	663	77	663	66	663	91
664	167	664	120	664	114	664	90	664	67	664	86
665	163	665	135	665	102	665	83	665	74	665	71
666	165	666	113	666	112	666	70	666	74	666	77
667	141	667	112	667	105	667	81	667	63	667	80
668	183	668	94	668	100	668	87	668	51	668	68
669	138	669	123	669	122	669	73	669	39	669	79
670	148	670	98	670	90	670	73	670	73	670	75
671	169	671	126	671	95	671	84	671	68	671	69
672	132	672	98	672	99	672	70	672	52	672	85
673	139	673	111	673	88	673	61	673	66	673	64
674	153	674	98	674	98	674	80	674	62	674	57
675	129	675	92	675	72	675	72	675	74	675	65
676	136	676	111	676	96	676	68	676	61	676	71
677	122	677	100	677	96	677	65	677	53	677	53
678	131	678	81	678	93	678	71	678	60	678	56
679	119	679	99	679	82	679	63	679	46	679	66
680	123	680	106	680	94	680	67	680	62	680	59

## Sheet: Figure S15 (b)
365	59	365	80	365	67	365	75	365	66	365	53
366	58	366	95	366	86	366	83	366	75	366	80
367	60	367	73	367	77	367	72	367	71	367	70
368	79	368	85	368	80	368	83	368	79	368	94
369	67	369	84	369	76	369	84	369	87	369	81
370	99	370	99	370	82	370	72	370	91	370	105
371	69	371	115	371	109	371	89	371	97	371	102
372	123	372	120	372	105	372	92	372	105	372	104
373	106	373	140	373	107	373	110	373	143	373	137
374	98	374	142	374	119	374	157	374	156	374	148
375	139	375	160	375	158	375	155	375	182	375	156
376	182	376	173	376	177	376	187	376	199	376	186
377	196	377	231	377	214	377	197	377	221	377	215
378	209	378	254	378	219	378	275	378	226	378	283
379	302	379	330	379	290	379	263	379	305	379	346
380	299	380	352	380	323	380	366	380	383	380	377
381	356	381	466	381	414	381	437	381	432	381	483
382	449	382	531	382	478	382	512	382	507	382	525
383	528	383	645	383	602	383	591	383	610	383	643
384	645	384	780	384	707	384	723	384	750	384	751
385	759	385	988	385	824	385	897	385	875	385	905
386	983	386	1101	386	1034	386	991	386	1010	386	1043
387	1146	387	1338	387	1220	387	1213	387	1153	387	1312
388	1311	388	1525	388	1488	388	1368	388	1387	388	1493
389	1529	389	1780	389	1750	389	1650	389	1606	389	1755
390	1847	390	2094	390	1934	390	1894	390	2001	390	2023
391	2239	391	2438	391	2350	391	2138	391	2261	391	2385
392	2490	392	2875	392	2689	392	2576	392	2576	392	2856
393	2986	393	3210	393	3152	393	3069	393	3077	393	3220
394	3472	394	3818	394	3566	394	3525	394	3468	394	3864
395	4050	395	4369	395	4189	395	4020	395	4047	395	4303
396	4641	396	4871	396	4717	396	4562	396	4589	396	4939
397	5322	397	5503	397	5434	397	5126	397	5124	397	5608
398	5940	398	6300	398	5928	398	5902	398	5840	398	6191
399	6943	399	6996	399	7005	399	6692	399	6635	399	6985
400	7515	400	7774	400	7695	400	7540	400	7410	400	7882
401	8348	401	8648	401	8687	401	8100	401	8047	401	8763
402	9533	402	9532	402	9439	402	9039	402	9018	402	9618
403	10295	403	10482	403	10335	403	10046	403	9908	403	10598
404	11337	404	11693	404	11274	404	10992	404	10740	404	11563
405	12541	405	12504	405	12446	405	11830	405	11699	405	12324
406	13200	406	13486	406	13382	406	12818	406	12716	406	13438
407	14343	407	14635	407	14607	407	13975	407	13765	407	14560
408	15351	408	15351	408	15487	408	14683	408	14432	408	15595
409	16256	409	16636	409	16441	409	15565	409	15596	409	16653
410	17559	410	17563	410	17553	410	16682	410	16269	410	17280
411	18623	411	18381	411	18810	411	17691	411	17592	411	18534
412	19464	412	19629	412	19573	412	18739	412	18428	412	19495
413	20544	413	20606	413	20528	413	19772	413	19440	413	20586
414	21776	414	21678	414	21624	414	20638	414	20146	414	21542
415	22933	415	22372	415	22491	415	21556	415	21262	415	22421
416	24027	416	23452	416	23389	416	22379	416	22307	416	23455
417	24653	417	24449	417	24657	417	23212	417	23014	417	24527
418	25578	418	25380	418	25245	418	24536	418	23632	418	25344
419	26812	419	26333	419	26298	419	25329	419	24829	419	26225
420	27835	420	27106	420	27372	420	26054	420	25298	420	26885
421	28647	421	27888	421	27924	421	27043	421	26391	421	27782
422	29485	422	28585	422	28697	422	27685	422	27246	422	28621
423	29814	423	29310	423	29690	423	28345	423	27819	423	29358
424	31109	424	30329	424	30944	424	29389	424	28520	424	30288
425	31708	425	31218	425	31292	425	29793	425	29214	425	30965
426	32403	426	31837	426	32039	426	30740	426	29952	426	31868
427	32878	427	32621	427	32571	427	30971	427	30713	427	32132
428	33630	428	32780	428	33441	428	31650	428	30902	428	33406
429	34157	429	33964	429	34220	429	32190	429	31252	429	33500
430	34721	430	34117	430	34378	430	32795	430	32263	430	33982
431	35431	431	34456	431	34658	431	33223	431	32692	431	34376
432	35951	432	35433	432	35839	432	34124	432	33002	432	34920
433	36274	433	35354	433	36039	433	34189	433	33638	433	35291
434	36610	434	35804	434	37014	434	35010	434	33688	434	35784
435	37241	435	36093	435	36603	435	35350	435	34043	435	36570
436	37659	436	36691	436	37111	436	34980	436	34511	436	36781
437	37901	437	36682	437	37442	437	35718	437	35115	437	37147
438	38220	438	37584	438	38044	438	35772	438	35007	438	37282
439	38288	439	37369	439	37992	439	35991	439	35043	439	37713
440	38689	440	37288	440	38339	440	36307	440	35597	440	37695
441	38932	441	37781	441	38365	441	36475	441	35798	441	38023
442	39221	442	37993	442	38558	442	36725	442	36122	442	38105
443	38994	443	37459	443	38603	443	36537	443	35786	443	38296
444	39072	444	38068	444	38562	444	36470	444	35788	444	37792
445	39114	445	37798	445	38639	445	37125	445	35770	445	37826
446	39533	446	37667	446	38461	446	36699	446	35967	446	37932
447	39374	447	37741	447	38881	447	36707	447	35875	447	37780
448	39138	448	38030	448	38610	448	36849	448	35994	448	37565
449	38883	449	37864	449	38474	449	36982	449	35688	449	37445
450	39016	450	37480	450	37851	450	36346	450	35356	450	37376
451	38765	451	36909	451	37915	451	36118	451	34888	451	37611
452	38828	452	36860	452	37585	452	35745	452	34786	452	37049
453	38047	453	36775	453	37296	453	35682	453	34797	453	36829
454	37702	454	36443	454	37042	454	35237	454	34571	454	36512
455	37451	455	35918	455	36583	455	35158	455	33890	455	35842
456	37218	456	35496	456	36236	456	34390	456	33356	456	35647
457	36763	457	35333	457	35849	457	34555	457	33356	457	35290
458	36074	458	35049	458	35548	458	34135	458	33084	458	34787
459	35822	459	34588	459	35097	459	33223	459	32425	459	34549
460	35804	460	33938	460	34551	460	33274	460	32484	460	34153
461	34889	461	33598	461	34470	461	32478	461	31688	461	33710
462	34593	462	32901	462	33793	462	32453	462	31090	462	33033
463	33921	463	32680	463	33494	463	32018	463	30548	463	32462
464	33704	464	31888	464	33363	464	31282	464	30370	464	32302
465	33041	465	31544	465	32384	465	30414	465	29653	465	31651
466	32426	466	31048	466	31509	466	30422	466	29499	466	31305
467	32128	467	30600	467	31057	467	29704	467	28939	467	30237
468	31057	468	29902	468	30431	468	29575	468	28244	468	30030
469	30719	469	28999	469	30025	469	28463	469	27963	469	29336
470	29932	470	28403	470	29315	470	28061	470	27051	470	28675
471	29591	471	28166	471	28650	471	27542	471	26775	471	27789
472	28973	472	27340	472	28230	472	26849	472	26052	472	27536
473	28185	473	26923	473	27660	473	26401	473	25530	473	27175
474	27618	474	26659	474	27037	474	25969	474	24996	474	26146
475	27035	475	25941	475	26266	475	25341	475	24256	475	25986
476	26692	476	25317	476	25785	476	25158	476	24033	476	25178
477	26045	477	24834	477	25265	477	24571	477	23373	477	24877
478	25545	478	23932	478	24856	478	23539	478	22963	478	24611
479	25100	479	23729	479	24448	479	23435	479	22647	479	23677
480	24327	480	23109	480	23668	480	22507	480	22341	480	23005
481	23882	481	22856	481	22872	481	22299	481	21237	481	22726
482	23491	482	22279	482	22700	482	21534	482	20926	482	21999
483	22844	483	21573	483	22301	483	21066	483	20480	483	21515
484	22560	484	21543	484	21617	484	20829	484	19927	484	21110
485	21427	485	20634	485	21273	485	20493	485	19720	485	20640
486	21334	486	20415	486	20644	486	19499	486	18965	486	19918
487	21017	487	19579	487	20214	487	19281	487	18513	487	19531
488	20096	488	18780	488	19789	488	18877	488	17952	488	19730
489	19667	489	18521	489	19186	489	18023	489	17848	489	18706
490	19275	490	17896	490	18839	490	17814	490	17311	490	18108
491	18646	491	17699	491	18211	491	17239	491	16814	491	17556
492	18022	492	17296	492	17718	492	16622	492	16311	492	17207
493	17791	493	16736	493	17082	493	16405	493	15890	493	16934
494	17101	494	16129	494	16670	494	16042	494	15449	494	16328
495	16676	495	15626	495	16134	495	15586	495	15172	495	15939
496	16206	496	15497	496	15902	496	15159	496	14520	496	15287
497	15772	497	14831	497	15339	497	14693	497	14475	497	14922
498	15418	498	14435	498	14960	498	14417	498	13799	498	14607
499	14909	499	14072	499	14556	499	13777	499	13435	499	14225
500	14632	500	13548	500	14269	500	13550	500	13287	500	13922
501	14092	501	13293	501	13797	501	13105	501	12554	501	13387
502	13489	502	12937	502	13044	502	12715	502	12205	502	12941
503	13164	503	12513	503	12761	503	12279	503	11850	503	12485
504	12828	504	12138	504	12286	504	11859	504	11514	504	12153
505	12552	505	11628	505	12156	505	11838	505	11095	505	11763
506	11879	506	11397	506	11604	506	11239	506	10824	506	11358
507	11734	507	10958	507	11167	507	10991	507	10562	507	11080
508	11344	508	10612	508	10919	508	10492	508	10213	508	10517
509	10979	509	10505	509	10555	509	10259	509	9752	509	10398
510	10511	510	10186	510	10293	510	9778	510	9516	510	10080
511	10221	511	9552	511	9893	511	9623	511	9389	511	9749
512	9908	512	9517	512	9852	512	9389	512	8981	512	9406
513	9577	513	9039	513	9276	513	9082	513	8768	513	9103
514	9452	514	8720	514	9029	514	8667	514	8558	514	8852
515	8940	515	8482	515	8787	515	8354	515	8181	515	8744
516	8725	516	8361	516	8576	516	8118	516	7888	516	8347
517	8414	517	8117	517	8237	517	7895	517	7732	517	8163
518	8235	518	8059	518	7890	518	7775	518	7324	518	7654
519	8023	519	7384	519	7766	519	7377	519	7170	519	7549
520	7616	520	7286	520	7572	520	7192	520	6928	520	7444
521	7466	521	6954	521	7099	521	6825	521	6748	521	7022
522	7177	522	6771	522	6970	522	6759	522	6521	522	6861
523	6928	523	6603	523	6912	523	6506	523	6347	523	6603
524	6610	524	6287	524	6512	524	6182	524	6183	524	6363
525	6502	525	6182	525	6322	525	6202	525	5789	525	6209
526	6222	526	5846	526	6196	526	5888	526	5583	526	5917
527	6056	527	5860	527	5808	527	5635	527	5465	527	5776
528	5810	528	5449	528	5761	528	5371	528	5241	528	5490
529	5602	529	5344	529	5552	529	5292	529	5098	529	5267
530	5451	530	5075	530	5353	530	5058	530	4878	530	5171
531	5338	531	5015	531	5122	531	4845	531	4852	531	4993
532	5111	532	4815	532	4893	532	4759	532	4457	532	4854
533	4952	533	4562	533	4876	533	4557	533	4395	533	4792
534	4736	534	4496	534	4579	534	4383	534	4292	534	4564
535	4615	535	4342	535	4316	535	4323	535	4234	535	4297
536	4514	536	4189	536	4275	536	4125	536	4063	536	4193
537	4346	537	3971	537	4138	537	4092	537	3850	537	4120
538	4170	538	3860	538	4024	538	3728	538	3735	538	3989
539	4000	539	3703	539	3800	539	3683	539	3627	539	3708
540	3839	540	3645	540	3665	540	3491	540	3493	540	3600
541	3606	541	3502	541	3526	541	3442	541	3325	541	3654
542	3719	542	3448	542	3526	542	3371	542	3262	542	3305
543	3368	543	3192	543	3414	543	3255	543	3121	543	3308
544	3225	544	3188	544	3261	544	3110	544	2918	544	3138
545	3253	545	3068	545	3148	545	3006	545	2886	545	3026
546	3113	546	2922	546	3003	546	2875	546	2821	546	2970
547	3026	547	2778	547	2893	547	2804	547	2651	547	2846
548	2899	548	2766	548	2738	548	2650	548	2572	548	2872
549	2853	549	2641	549	2714	549	2683	549	2527	549	2570
550	2688	550	2513	550	2630	550	2576	550	2401	550	2630
551	2544	551	2427	551	2505	551	2467	551	2332	551	2452
552	2538	552	2330	552	2436	552	2397	552	2170	552	2342
553	2387	553	2319	553	2345	553	2274	553	2197	553	2307
554	2249	554	2277	554	2280	554	2152	554	2194	554	2225
555	2343	555	2104	555	2203	555	2176	555	2018	555	2189
556	2082	556	2060	556	2067	556	1971	556	1978	556	1967
557	2144	557	1986	557	2067	557	1996	557	1926	557	2048
558	2027	558	1952	558	1902	558	1832	558	1813	558	1937
559	2009	559	1810	559	1890	559	1840	559	1692	559	1845
560	1856	560	1821	560	1863	560	1742	560	1725	560	1836
561	1849	561	1730	561	1787	561	1690	561	1736	561	1721
562	1749	562	1710	562	1690	562	1655	562	1633	562	1600
563	1722	563	1620	563	1684	563	1621	563	1552	563	1643
564	1585	564	1562	564	1594	564	1584	564	1488	564	1575
565	1607	565	1476	565	1583	565	1486	565	1392	565	1479
566	1466	566	1437	566	1528	566	1410	566	1435	566	1480
567	1504	567	1425	567	1428	567	1391	567	1376	567	1404
568	1477	568	1363	568	1421	568	1324	568	1283	568	1323
569	1436	569	1367	569	1378	569	1346	569	1219	569	1344
570	1314	570	1330	570	1300	570	1263	570	1226	570	1237
571	1259	571	1285	571	1229	571	1236	571	1153	571	1272
572	1240	572	1157	572	1237	572	1229	572	1209	572	1164
573	1241	573	1173	573	1218	573	1081	573	1079	573	1091
574	1204	574	1179	574	1094	574	1127	574	1075	574	1111
575	1112	575	1091	575	1089	575	1096	575	985	575	1092
576	1131	576	1069	576	1075	576	1044	576	1007	576	1019
577	1087	577	1051	577	1037	577	1016	577	966	577	1008
578	1009	578	956	578	1045	578	980	578	946	578	1041
579	955	579	939	579	1005	579	903	579	931	579	887
580	1018	580	860	580	926	580	885	580	891	580	878
581	931	581	888	581	910	581	865	581	828	581	943
582	912	582	863	582	882	582	868	582	834	582	805
583	914	583	827	583	872	583	811	583	815	583	796
584	836	584	801	584	855	584	765	584	755	584	833
585	820	585	784	585	831	585	774	585	742	585	763
586	851	586	784	586	775	586	725	586	734	586	772
587	776	587	758	587	728	587	753	587	733	587	773
588	712	588	733	588	724	588	703	588	730	588	767
589	710	589	683	589	719	589	701	589	677	589	651
590	734	590	659	590	685	590	697	590	644	590	668
591	657	591	603	591	662	591	697	591	626	591	649
592	643	592	643	592	682	592	616	592	629	592	609
593	615	593	647	593	629	593	596	593	573	593	598
594	646	594	599	594	606	594	581	594	551	594	571
595	597	595	589	595	596	595	524	595	560	595	587
596	568	596	573	596	555	596	605	596	547	596	563
597	581	597	567	597	545	597	525	597	504	597	536
598	542	598	542	598	579	598	528	598	502	598	566
599	573	599	493	599	503	599	529	599	519	599	505
600	544	600	504	600	507	600	505	600	496	600	493
601	498	601	469	601	443	601	466	601	460	601	467
602	482	602	455	602	458	602	462	602	426	602	436
603	480	603	453	603	509	603	476	603	441	603	485
604	460	604	429	604	421	604	441	604	431	604	461
605	461	605	395	605	422	605	430	605	413	605	431
606	420	606	437	606	379	606	442	606	402	606	404
607	381	607	433	607	404	607	407	607	423	607	382
608	418	608	389	608	393	608	380	608	366	608	408
609	433	609	404	609	389	609	385	609	376	609	378
610	354	610	368	610	385	610	343	610	368	610	368
611	355	611	343	611	349	611	348	611	355	611	355
612	375	612	331	612	349	612	329	612	337	612	369
613	308	613	361	613	325	613	304	613	376	613	309
614	374	614	312	614	320	614	346	614	313	614	331
615	369	615	297	615	310	615	283	615	282	615	314
616	308	616	301	616	299	616	288	616	327	616	300
617	274	617	296	617	351	617	266	617	275	617	306
618	289	618	312	618	291	618	300	618	261	618	278
619	311	619	273	619	309	619	260	619	255	619	304
620	297	620	289	620	289	620	315	620	236	620	251
621	233	621	259	621	262	621	239	621	262	621	266
622	258	622	285	622	274	622	236	622	313	622	234
623	260	623	234	623	255	623	245	623	240	623	271
624	246	624	228	624	245	624	235	624	218	624	240
625	253	625	239	625	228	625	233	625	224	625	259
626	254	626	227	626	208	626	238	626	195	626	227
627	214	627	245	627	255	627	217	627	226	627	215
628	223	628	213	628	220	628	222	628	209	628	235
629	198	629	205	629	203	629	201	629	189	629	223
630	221	630	216	630	237	630	202	630	205	630	196
631	240	631	198	631	206	631	182	631	185	631	202
632	228	632	188	632	197	632	193	632	185	632	205
633	195	633	202	633	183	633	194	633	193	633	201
634	186	634	177	634	192	634	186	634	171	634	176
635	201	635	180	635	204	635	176	635	169	635	185
636	183	636	185	636	171	636	216	636	157	636	169
637	166	637	194	637	190	637	151	637	158	637	197
638	188	638	162	638	169	638	178	638	180	638	164
639	174	639	185	639	157	639	158	639	162	639	180
640	140	640	158	640	152	640	150	640	150	640	181
641	156	641	140	641	160	641	152	641	166	641	174
642	154	642	141	642	144	642	162	642	127	642	152
643	148	643	166	643	143	643	140	643	153	643	158
644	151	644	190	644	162	644	143	644	136	644	141
645	159	645	148	645	134	645	134	645	135	645	150
646	126	646	150	646	150	646	150	646	151	646	160
647	148	647	151	647	144	647	138	647	146	647	146
648	154	648	153	648	174	648	130	648	133	648	148
649	126	649	133	649	135	649	140	649	150	649	135
650	130	650	135	650	144	650	135	650	127	650	125
651	130	651	118	651	132	651	124	651	106	651	137
652	116	652	137	652	126	652	118	652	132	652	135
653	139	653	139	653	132	653	116	653	107	653	129
654	128	654	118	654	124	654	117	654	128	654	121
655	125	655	114	655	107	655	127	655	118	655	124
656	130	656	119	656	102	656	120	656	121	656	109
657	107	657	102	657	117	657	117	657	107	657	125
658	114	658	128	658	124	658	133	658	108	658	121
659	110	659	98	659	127	659	104	659	104	659	104
660	120	660	108	660	103	660	114	660	111	660	106
661	97	661	94	661	110	661	113	661	108	661	111
662	110	662	105	662	98	662	103	662	108	662	103
663	107	663	91	663	124	663	102	663	108	663	83
664	99	664	115	664	108	664	102	664	96	664	124
665	93	665	114	665	110	665	97	665	94	665	104
666	101	666	86	666	113	666	95	666	90	666	107
667	104	667	104	667	101	667	91	667	87	667	87
668	92	668	91	668	81	668	89	668	94	668	101
669	94	669	96	669	104	669	89	669	80	669	87
670	79	670	86	670	93	670	86	670	84	670	95
671	91	671	92	671	90	671	83	671	75	671	82
672	97	672	88	672	101	672	77	672	89	672	64
673	77	673	91	673	81	673	81	673	89	673	66
674	90	674	84	674	97	674	106	674	82	674	84
675	81	675	83	675	81	675	88	675	75	675	78
676	88	676	98	676	88	676	68	676	72	676	94
677	76	677	98	677	95	677	63	677	66	677	73
678	86	678	65	678	97	678	99	678	71	678	69
679	62	679	92	679	76	679	81	679	79	679	75
680	79	680	67	680	86	680	76	680	91	680	73

## Sheet: Figure S15(c)
365	66	365	70	365	60	365	42	365	53	365	72
366	59	366	56	366	61	366	52	366	46	366	60
367	52	367	65	367	54	367	55	367	54	367	64
368	52	368	61	368	66	368	51	368	35	368	69
369	64	369	65	369	77	369	62	369	44	369	79
370	77	370	81	370	70	370	54	370	57	370	58
371	67	371	77	371	92	371	61	371	64	371	81
372	84	372	97	372	75	372	67	372	70	372	81
373	73	373	82	373	105	373	60	373	48	373	81
374	93	374	98	374	126	374	73	374	77	374	99
375	98	375	135	375	133	375	79	375	98	375	115
376	122	376	153	376	140	376	95	376	96	376	106
377	133	377	170	377	177	377	96	377	137	377	137
378	146	378	196	378	202	378	132	378	138	378	146
379	168	379	231	379	232	379	152	379	156	379	170
380	214	380	259	380	260	380	174	380	196	380	171
381	247	381	322	381	315	381	191	381	256	381	211
382	306	382	363	382	387	382	239	382	245	382	232
383	365	383	447	383	459	383	269	383	314	383	250
384	447	384	495	384	603	384	343	384	396	384	329
385	534	385	593	385	713	385	397	385	455	385	355
386	641	386	710	386	782	386	513	386	532	386	385
387	752	387	841	387	968	387	562	387	600	387	507
388	955	388	1039	388	1147	388	667	388	701	388	515
389	1107	389	1170	389	1365	389	830	389	893	389	648
390	1354	390	1408	390	1561	390	1019	390	1062	390	734
391	1618	391	1640	391	1840	391	1247	391	1145	391	851
392	2005	392	1887	392	2197	392	1433	392	1454	392	1011
393	2238	393	2290	393	2567	393	1683	393	1607	393	1150
394	2794	394	2708	394	2924	394	1953	394	1969	394	1272
395	3248	395	3196	395	3385	395	2290	395	2178	395	1505
396	3791	396	3740	396	3849	396	2649	396	2560	396	1782
397	4337	397	4192	397	4368	397	3051	397	2892	397	2026
398	5035	398	4932	398	4906	398	3414	398	3353	398	2267
399	5748	399	5493	399	5555	399	4077	399	3795	399	2540
400	6627	400	6027	400	6240	400	4476	400	4350	400	2861
401	7486	401	7158	401	6801	401	5006	401	4731	401	3190
402	8204	402	7643	402	7670	402	5612	402	5310	402	3521
403	9108	403	8441	403	8547	403	6167	403	5841	403	3954
404	10229	404	9352	404	9313	404	6947	404	6535	404	4219
405	11383	405	10245	405	10191	405	7609	405	7053	405	4718
406	12267	406	11044	406	10665	406	8204	406	7657	406	4941
407	13441	407	12037	407	11637	407	9013	407	8136	407	5390
408	14767	408	13220	408	12464	408	9807	408	8792	408	5866
409	15733	409	14089	409	13258	409	10173	409	9602	409	6347
410	16652	410	15030	410	14073	410	11068	410	10150	410	6906
411	17750	411	16287	411	15203	411	11716	411	10748	411	7189
412	19003	412	17024	412	15659	412	12353	412	11445	412	7621
413	20366	413	17798	413	16580	413	13063	413	11927	413	8059
414	21248	414	18735	414	17484	414	13923	414	12510	414	8550
415	22129	415	19832	415	18243	415	14568	415	13195	415	9180
416	23543	416	20832	416	19025	416	15259	416	13723	416	9495
417	24403	417	21529	417	19930	417	16010	417	14237	417	9985
418	25365	418	22647	418	20543	418	16501	418	14984	418	10270
419	27131	419	23227	419	21294	419	17210	419	15573	419	10749
420	27705	420	24089	420	21927	420	17995	420	16207	420	11221
421	28821	421	25304	421	23137	421	18466	421	16567	421	11580
422	29708	422	25736	422	23857	422	18975	422	17295	422	11912
423	30827	423	26836	423	23938	423	19841	423	17697	423	12129
424	31672	424	27455	424	24687	424	20027	424	18128	424	12740
425	32957	425	28338	425	25250	425	20826	425	18507	425	13025
426	33272	426	28864	426	25623	426	20824	426	19031	426	13484
427	34716	427	29379	427	26947	427	21585	427	19352	427	13615
428	35007	428	30040	428	26890	428	22171	428	20038	428	13871
429	36142	429	30780	429	27531	429	22529	429	20063	429	14210
430	36731	430	31587	430	28010	430	22795	430	20822	430	14454
431	37351	431	32151	431	28639	431	23320	431	20934	431	14794
432	38272	432	32744	432	28743	432	23345	432	21327	432	15116
433	38941	433	33369	433	29041	433	24176	433	21612	433	15338
434	39601	434	33714	434	29743	434	24485	434	22146	434	15631
435	39878	435	34075	435	29705	435	24585	435	22189	435	15519
436	40290	436	34259	436	30344	436	25162	436	22263	436	15981
437	41175	437	34753	437	30502	437	25260	437	22641	437	16161
438	41446	438	35122	438	30537	438	25619	438	22733	438	16498
439	42188	439	35603	439	30674	439	25674	439	22939	439	16393
440	42515	440	35967	440	30661	440	25902	440	23425	440	16785
441	42642	441	36260	441	30971	441	25848	441	23384	441	16546
442	43397	442	36034	442	31153	442	26455	442	23176	442	16714
443	44019	443	36530	443	31161	443	26418	443	23655	443	16802
444	43817	444	36549	444	31261	444	26206	444	23648	444	17033
445	43814	445	37074	445	31239	445	26389	445	23832	445	16782
446	44489	446	37284	446	31257	446	26532	446	23910	446	17165
447	44280	447	36954	447	31039	447	26316	447	23865	447	17091
448	44655	448	37151	448	31177	448	26566	448	23886	448	17195
449	44736	449	37027	449	31266	449	26386	449	23754	449	17104
450	44706	450	36850	450	30510	450	26163	450	23533	450	16934
451	44429	451	36941	451	30989	451	26230	451	23339	451	17119
452	44352	452	36867	452	30253	452	25797	452	23357	452	16927
453	43712	453	36777	453	30233	453	25811	453	23128	453	16838
454	44005	454	36371	454	30052	454	25620	454	22973	454	16792
455	43397	455	35988	455	29692	455	25537	455	22892	455	16575
456	43603	456	35780	456	29515	456	25210	456	22524	456	16769
457	43093	457	35744	457	29155	457	24897	457	22563	457	16262
458	42719	458	35177	458	28528	458	24771	458	22039	458	16134
459	42590	459	34755	459	28225	459	24560	459	21940	459	16156
460	41868	460	34135	460	27780	460	24323	460	21793	460	16086
461	42112	461	34260	461	27656	461	23940	461	21559	461	15850
462	41396	462	33738	462	27291	462	23504	462	21024	462	15672
463	40848	463	33638	463	27006	463	23303	463	21028	463	15370
464	40158	464	32524	464	26662	464	22839	464	20607	464	15577
465	39724	465	32741	465	26068	465	22615	465	20500	465	15063
466	39403	466	31996	466	25516	466	22601	466	20163	466	14873
467	38492	467	31598	467	25132	467	22077	467	19758	467	14682
468	38275	468	31092	468	24786	468	21290	468	19277	468	14263
469	37266	469	30436	469	24221	469	20951	469	18804	469	14046
470	37173	470	29764	470	23588	470	20590	470	18604	470	13772
471	36244	471	29201	471	23170	471	20320	471	18337	471	13376
472	35704	472	28639	472	22451	472	20033	472	17907	472	13517
473	34417	473	28248	473	22449	473	19213	473	17624	473	13257
474	34339	474	27929	474	21657	474	19096	474	17297	474	12744
475	33458	475	27616	475	21426	475	18953	475	16757	475	12599
476	33339	476	26742	476	20719	476	18510	476	16358	476	12312
477	32748	477	26313	477	20393	477	17763	477	16033	477	12223
478	31946	478	25895	478	19797	478	17388	478	15811	478	11856
479	31272	479	24969	479	19511	479	17431	479	15486	479	11610
480	30519	480	24857	480	18755	480	16869	480	15364	480	11564
481	30024	481	24396	481	18473	481	16681	481	15045	481	11141
482	29712	482	23796	482	18341	482	15914	482	14658	482	11154
483	28876	483	23231	483	17574	483	15794	483	14380	483	10815
484	28122	484	22887	484	17333	484	15360	484	13921	484	10505
485	27703	485	22230	485	16962	485	15068	485	13515	485	10291
486	26967	486	21852	486	16697	486	14833	486	13337	486	10042
487	26229	487	21256	487	16095	487	14523	487	12941	487	9864
488	25768	488	20679	488	15581	488	14084	488	12691	488	9473
489	25326	489	20284	489	15543	489	13733	489	12312	489	9400
490	24656	490	19881	490	14921	490	13235	490	11992	490	9044
491	24041	491	19105	491	14464	491	13227	491	11629	491	8937
492	23475	492	19006	492	14026	492	12528	492	11408	492	8681
493	22844	493	18342	493	13778	493	12240	493	10940	493	8380
494	22612	494	17929	494	13393	494	11870	494	10747	494	8247
495	21705	495	17638	495	13042	495	11631	495	10139	495	8039
496	21280	496	16930	496	12578	496	11306	496	10161	496	7803
497	20754	497	16633	497	12429	497	10936	497	9890	497	7592
498	20345	498	16303	498	12233	498	10821	498	9590	498	7585
499	19593	499	15694	499	11719	499	10308	499	9308	499	7141
500	19112	500	15457	500	11174	500	10073	500	8894	500	6893
501	18786	501	14801	501	10991	501	9743	501	8706	501	6845
502	17984	502	14294	502	10312	502	9418	502	8513	502	6823
503	17518	503	14060	503	10268	503	9385	503	8147	503	6543
504	16854	504	13553	504	9953	504	9042	504	8036	504	6202
505	16787	505	13128	505	9577	505	8842	505	7849	505	6134
506	15986	506	12641	506	9285	506	8482	506	7610	506	5942
507	15826	507	12368	507	9142	507	8184	507	7327	507	5730
508	15322	508	11986	508	8781	508	7922	508	7239	508	5669
509	14597	509	11742	509	8536	509	7616	509	6785	509	5517
510	14593	510	11378	510	8182	510	7414	510	6807	510	5297
511	13921	511	11131	511	7938	511	7154	511	6542	511	4996
512	13483	512	10764	512	7762	512	7050	512	6331	512	4927
513	13068	513	10494	513	7342	513	6787	513	6098	513	4951
514	12659	514	10116	514	7090	514	6573	514	5912	514	4731
515	12374	515	9692	515	7112	515	6246	515	5672	515	4556
516	11908	516	9358	516	6756	516	6230	516	5581	516	4530
517	11577	517	9391	517	6583	517	5998	517	5374	517	4246
518	11140	518	8891	518	6465	518	5812	518	5280	518	4203
519	10763	519	8773	519	6232	519	5581	519	4928	519	3970
520	10637	520	8202	520	5946	520	5500	520	4810	520	3946
521	10214	521	8235	521	5702	521	5246	521	4780	521	3749
522	9903	522	7742	522	5499	522	5140	522	4474	522	3674
523	9560	523	7685	523	5421	523	4946	523	4427	523	3608
524	9281	524	7306	524	5169	524	4717	524	4273	524	3425
525	8990	525	7195	525	4883	525	4660	525	4122	525	3366
526	8521	526	6882	526	4921	526	4495	526	4050	526	3199
527	8404	527	6636	527	4649	527	4184	527	3795	527	3230
528	8028	528	6495	528	4579	528	4228	528	3704	528	2960
529	7936	529	6264	529	4373	529	4018	529	3594	529	2990
530	7639	530	6006	530	4181	530	3927	530	3543	530	2884
531	7330	531	5799	531	4111	531	3649	531	3326	531	2865
532	7154	532	5610	532	3954	532	3671	532	3225	532	2693
533	6970	533	5372	533	3724	533	3563	533	3059	533	2676
534	6645	534	5318	534	3645	534	3445	534	3049	534	2652
535	6387	535	5117	535	3472	535	3357	535	2992	535	2468
536	6134	536	4914	536	3436	536	3162	536	2865	536	2360
537	5909	537	4901	537	3344	537	3079	537	2653	537	2366
538	5798	538	4548	538	3212	538	3006	538	2639	538	2219
539	5599	539	4481	539	3007	539	2879	539	2525	539	2156
540	5569	540	4330	540	3124	540	2678	540	2468	540	2063
541	5187	541	4274	541	2784	541	2812	541	2453	541	2032
542	5076	542	3909	542	2662	542	2564	542	2341	542	1906
543	4893	543	3839	543	2618	543	2457	543	2201	543	1945
544	4700	544	3734	544	2565	544	2419	544	2090	544	1817
545	4679	545	3668	545	2472	545	2322	545	2127	545	1766
546	4322	546	3460	546	2439	546	2260	546	1973	546	1667
547	4254	547	3531	547	2287	547	2150	547	1948	547	1671
548	4162	548	3257	548	2221	548	2109	548	1903	548	1625
549	3889	549	3161	549	2105	549	1998	549	1838	549	1586
550	3791	550	3070	550	2134	550	1992	550	1686	550	1541
551	3676	551	2906	551	1972	551	1904	551	1749	551	1504
552	3520	552	2976	552	2008	552	1811	552	1657	552	1424
553	3458	553	2779	553	1858	553	1717	553	1588	553	1305
554	3215	554	2682	554	1840	554	1688	554	1544	554	1372
555	3261	555	2668	555	1779	555	1671	555	1498	555	1307
556	3203	556	2531	556	1740	556	1635	556	1403	556	1303
557	3000	557	2368	557	1617	557	1511	557	1395	557	1232
558	2885	558	2402	558	1534	558	1433	558	1282	558	1256
559	2833	559	2214	559	1533	559	1420	559	1288	559	1225
560	2718	560	2168	560	1477	560	1401	560	1250	560	1194
561	2694	561	2139	561	1418	561	1317	561	1216	561	1181
562	2496	562	1971	562	1409	562	1251	562	1102	562	1080
563	2531	563	1980	563	1247	563	1222	563	1160	563	1089
564	2399	564	1943	564	1249	564	1253	564	1065	564	1088
565	2335	565	1906	565	1290	565	1173	565	1044	565	992
566	2209	566	1818	566	1263	566	1072	566	1012	566	997
567	2144	567	1665	567	1165	567	1111	567	975	567	1007
568	2126	568	1658	568	1157	568	1075	568	981	568	951
569	2045	569	1691	569	1082	569	1101	569	924	569	879
570	1978	570	1588	570	1012	570	998	570	903	570	887
571	1866	571	1602	571	1017	571	1051	571	904	571	846
572	1863	572	1496	572	981	572	908	572	815	572	824
573	1796	573	1414	573	909	573	931	573	808	573	788
574	1759	574	1416	574	974	574	879	574	786	574	808
575	1637	575	1356	575	890	575	818	575	751	575	747
576	1589	576	1297	576	869	576	836	576	713	576	684
577	1492	577	1241	577	866	577	764	577	698	577	711
578	1492	578	1217	578	758	578	723	578	719	578	662
579	1466	579	1190	579	823	579	751	579	628	579	708
580	1488	580	1119	580	799	580	744	580	712	580	607
581	1402	581	1093	581	734	581	712	581	591	581	633
582	1290	582	1042	582	712	582	715	582	616	582	578
583	1249	583	1054	583	744	583	743	583	609	583	618
584	1253	584	1015	584	700	584	647	584	554	584	576
585	1246	585	1011	585	652	585	614	585	540	585	555
586	1154	586	932	586	581	586	592	586	561	586	585
587	1105	587	915	587	589	587	563	587	556	587	545
588	1092	588	878	588	581	588	591	588	477	588	517
589	1085	589	806	589	600	589	551	589	499	589	542
590	1058	590	802	590	563	590	535	590	490	590	457
591	1023	591	751	591	551	591	524	591	467	591	502
592	983	592	844	592	535	592	549	592	434	592	424
593	960	593	755	593	498	593	498	593	464	593	464
594	941	594	670	594	495	594	474	594	417	594	443
595	903	595	716	595	491	595	452	595	376	595	433
596	826	596	722	596	457	596	436	596	392	596	423
597	828	597	606	597	438	597	405	597	409	597	393
598	791	598	620	598	446	598	406	598	374	598	425
599	772	599	613	599	421	599	419	599	351	599	424
600	776	600	628	600	379	600	396	600	347	600	383
601	770	601	575	601	390	601	367	601	329	601	359
602	723	602	581	602	382	602	354	602	332	602	363
603	648	603	560	603	342	603	365	603	301	603	334
604	701	604	580	604	356	604	351	604	306	604	346
605	665	605	545	605	323	605	333	605	292	605	339
606	608	606	521	606	308	606	329	606	303	606	326
607	626	607	520	607	377	607	293	607	272	607	335
608	554	608	497	608	329	608	315	608	301	608	326
609	601	609	474	609	297	609	301	609	235	609	290
610	544	610	440	610	254	610	301	610	208	610	291
611	542	611	452	611	270	611	308	611	266	611	282
612	513	612	422	612	277	612	292	612	236	612	259
613	518	613	382	613	280	613	271	613	221	613	266
614	473	614	428	614	281	614	274	614	231	614	274
615	502	615	416	615	277	615	289	615	223	615	237
616	479	616	426	616	238	616	279	616	245	616	270
617	417	617	388	617	258	617	243	617	189	617	257
618	412	618	383	618	228	618	213	618	215	618	288
619	409	619	350	619	234	619	239	619	225	619	263
620	392	620	352	620	244	620	221	620	192	620	257
621	373	621	364	621	216	621	227	621	197	621	240
622	396	622	340	622	211	622	175	622	208	622	246
623	367	623	288	623	200	623	202	623	197	623	240
624	387	624	291	624	204	624	192	624	177	624	235
625	387	625	285	625	203	625	204	625	160	625	221
626	331	626	317	626	172	626	183	626	167	626	255
627	332	627	261	627	160	627	161	627	160	627	192
628	314	628	267	628	195	628	164	628	173	628	210
629	340	629	268	629	154	629	169	629	150	629	201
630	322	630	274	630	142	630	155	630	177	630	205
631	283	631	269	631	161	631	147	631	140	631	222
632	277	632	251	632	149	632	174	632	141	632	175
633	239	633	219	633	152	633	157	633	138	633	175
634	287	634	223	634	153	634	155	634	129	634	191
635	254	635	204	635	147	635	140	635	160	635	152
636	252	636	197	636	154	636	149	636	141	636	168
637	240	637	204	637	117	637	144	637	135	637	169
638	223	638	222	638	145	638	130	638	117	638	153
639	215	639	179	639	115	639	139	639	130	639	174
640	230	640	205	640	119	640	128	640	129	640	161
641	220	641	172	641	115	641	183	641	125	641	147
642	207	642	195	642	120	642	127	642	124	642	141
643	212	643	197	643	122	643	149	643	114	643	174
644	217	644	181	644	102	644	124	644	106	644	164
645	211	645	148	645	105	645	98	645	116	645	144
646	181	646	153	646	126	646	95	646	114	646	141
647	191	647	186	647	104	647	112	647	111	647	139
648	211	648	165	648	95	648	123	648	113	648	162
649	203	649	165	649	127	649	94	649	110	649	135
650	181	650	175	650	94	650	109	650	108	650	147
651	176	651	138	651	85	651	104	651	83	651	135
652	164	652	136	652	128	652	103	652	112	652	129
653	165	653	158	653	96	653	87	653	90	653	136
654	164	654	151	654	102	654	111	654	120	654	134
655	154	655	155	655	99	655	102	655	96	655	140
656	168	656	147	656	88	656	100	656	85	656	121
657	164	657	116	657	71	657	103	657	80	657	106
658	136	658	135	658	92	658	94	658	78	658	120
659	131	659	132	659	80	659	105	659	75	659	99
660	134	660	113	660	76	660	78	660	85	660	107
661	123	661	109	661	81	661	74	661	83	661	121
662	140	662	133	662	74	662	78	662	76	662	118
663	132	663	109	663	66	663	89	663	91	663	111
664	116	664	114	664	67	664	85	664	75	664	99
665	117	665	102	665	74	665	87	665	86	665	111
666	129	666	112	666	74	666	73	666	66	666	117
667	111	667	105	667	63	667	66	667	58	667	108
668	125	668	100	668	51	668	68	668	77	668	97
669	108	669	122	669	39	669	78	669	68	669	114
670	124	670	90	670	73	670	79	670	67	670	99
671	125	671	95	671	68	671	81	671	60	671	109
672	112	672	99	672	52	672	63	672	72	672	101
673	99	673	88	673	66	673	86	673	64	673	98
674	127	674	98	674	62	674	52	674	58	674	80
675	88	675	72	675	74	675	71	675	74	675	92
676	105	676	96	676	61	676	82	676	64	676	101
677	91	677	96	677	53	677	55	677	63	677	84
678	93	678	93	678	60	678	54	678	49	678	89
679	92	679	82	679	46	679	74	679	51	679	98
680	88	680	94	680	62	680	79	680	51	680	94

## Sheet: Figure S15 (d)
365	44	365	46	365	42	365	45	365	39	365	54
366	65	366	50	366	53	366	46	366	52	366	53
367	47	367	51	367	61	367	44	367	53	367	48
368	67	368	59	368	59	368	53	368	40	368	61
369	53	369	52	369	52	369	59	369	42	369	60
370	75	370	64	370	55	370	56	370	49	370	63
371	63	371	65	371	70	371	62	371	58	371	46
372	70	372	64	372	73	372	55	372	62	372	46
373	64	373	71	373	62	373	65	373	72	373	68
374	72	374	64	374	67	374	55	374	79	374	80
375	91	375	93	375	101	375	73	375	71	375	76
376	90	376	100	376	98	376	103	376	105	376	95
377	132	377	99	377	116	377	92	377	103	377	128
378	124	378	121	378	130	378	123	378	145	378	116
379	147	379	133	379	158	379	148	379	122	379	148
380	197	380	191	380	163	380	168	380	162	380	159
381	245	381	214	381	205	381	187	381	196	381	205
382	229	382	262	382	243	382	258	382	217	382	225
383	287	383	274	383	309	383	304	383	277	383	271
384	356	384	365	384	349	384	322	384	333	384	330
385	444	385	418	385	438	385	389	385	342	385	384
386	507	386	545	386	520	386	479	386	507	386	492
387	591	387	594	387	585	387	563	387	569	387	587
388	740	388	676	388	696	388	664	388	682	388	751
389	884	389	908	389	910	389	789	389	833	389	782
390	1024	390	1007	390	961	390	1007	390	950	390	1026
391	1258	391	1282	391	1282	391	1184	391	1151	391	1231
392	1498	392	1504	392	1411	392	1304	392	1404	392	1356
393	1738	393	1703	393	1627	393	1612	393	1646	393	1669
394	1964	394	2098	394	1949	394	1801	394	1903	394	1847
395	2442	395	2333	395	2422	395	2101	395	2228	395	2197
396	2706	396	2721	396	2579	396	2513	396	2580	396	2542
397	3119	397	3109	397	3035	397	2856	397	2959	397	3036
398	3542	398	3590	398	3658	398	3248	398	3401	398	3388
399	4171	399	4141	399	3899	399	3842	399	3851	399	3797
400	4611	400	4581	400	4588	400	4321	400	4226	400	4406
401	5069	401	5115	401	5087	401	4802	401	4837	401	4989
402	5692	402	5690	402	5629	402	5421	402	5331	402	5605
403	6234	403	6343	403	6283	403	5828	403	5858	403	6246
404	7031	404	6994	404	6921	404	6493	404	6605	404	6766
405	7605	405	7650	405	7574	405	7232	405	7252	405	7317
406	8404	406	8492	406	8164	406	7806	406	7709	406	7943
407	9042	407	8958	407	8904	407	8372	407	8397	407	8519
408	9823	408	9698	408	9747	408	9061	408	9041	408	9222
409	10536	409	10357	409	10268	409	9874	409	9909	409	9938
410	11326	410	11310	410	10784	410	10554	410	10642	410	10735
411	12029	411	12018	411	11810	411	11215	411	11086	411	11273
412	12630	412	12536	412	12425	412	11712	412	11873	412	11959
413	13549	413	13544	413	13047	413	12555	413	12723	413	12790
414	13960	414	13963	414	13968	414	13071	414	13253	414	13372
415	14835	415	14772	415	14492	415	13824	415	13681	415	14113
416	15419	416	15367	416	15153	416	14565	416	14409	416	14777
417	16305	417	16284	417	15628	417	15135	417	15268	417	15467
418	16691	418	17251	418	16649	418	15704	418	15801	418	15884
419	17585	419	17330	419	16921	419	16185	419	16759	419	16545
420	18064	420	17780	420	17851	420	16886	420	17175	420	17064
421	18713	421	18783	421	18144	421	17516	421	17704	421	17906
422	19263	422	19135	422	19014	422	18129	422	17998	422	18127
423	19920	423	19968	423	19592	423	18775	423	18429	423	18832
424	20248	424	20312	424	19768	424	19211	424	19056	424	19477
425	20915	425	21080	425	20364	425	19572	425	19625	425	19932
426	21579	426	21454	426	21124	426	20328	426	20186	426	20292
427	22114	427	21832	427	21470	427	20546	427	20811	427	20768
428	22692	428	22330	428	21779	428	21047	428	20856	428	21215
429	23003	429	22855	429	22598	429	21607	429	21329	429	21849
430	23355	430	23120	430	22963	430	22273	430	21832	430	22081
431	23718	431	23635	431	23100	431	22420	431	22178	431	22056
432	24221	432	24012	432	23433	432	22629	432	22626	432	22642
433	24629	433	24371	433	24016	433	22822	433	22740	433	22965
434	24775	434	24751	434	24213	434	23183	434	23131	434	23648
435	25288	435	24999	435	24335	435	23565	435	23225	435	23734
436	25147	436	25397	436	24783	436	23811	436	23393	436	23775
437	25274	437	25529	437	25139	437	24054	437	23809	437	24244
438	25879	438	25842	438	25262	438	24050	438	24144	438	24164
439	25877	439	26211	439	25412	439	24596	439	24248	439	24307
440	26387	440	26140	440	25865	440	24754	440	24251	440	24712
441	26397	441	26327	441	25835	441	24818	441	24581	441	24837
442	26716	442	26636	442	26109	442	24803	442	24505	442	24948
443	27046	443	26495	443	25873	443	24927	443	24955	443	24646
444	26674	444	26537	444	26162	444	25153	444	24730	444	25066
445	26717	445	26836	445	25859	445	25222	445	24873	445	25204
446	26818	446	26897	446	26094	446	24774	446	24827	446	25316
447	26765	447	26574	447	26444	447	25040	447	24861	447	25233
448	26966	448	26434	448	26389	448	25039	448	24574	448	24809
449	26946	449	26639	449	26081	449	24982	449	24482	449	24661
450	26522	450	26657	450	25779	450	24648	450	24344	450	24698
451	26705	451	26597	451	25927	451	24879	451	24504	451	24638
452	26392	452	26096	452	25580	452	24665	452	24180	452	24406
453	26402	453	25939	453	25450	453	24363	453	24285	453	24233
454	26134	454	26024	454	25349	454	24287	454	23985	454	24193
455	25640	455	25977	455	25068	455	24122	455	23720	455	24056
456	25615	456	25610	456	24710	456	23799	456	23973	456	23815
457	25537	457	25056	457	24564	457	23616	457	23568	457	24000
458	25019	458	24991	458	24394	458	23276	458	23217	458	23406
459	24950	459	24545	459	24258	459	23372	459	22949	459	23070
460	24296	460	24490	460	23638	460	22787	460	22618	460	22635
461	24629	461	24075	461	23613	461	22595	461	22237	461	22629
462	24015	462	24014	462	23296	462	22137	462	22047	462	22108
463	24046	463	23174	463	22991	463	22047	463	21925	463	21655
464	23206	464	22972	464	22426	464	21902	464	21225	464	21731
465	22820	465	22959	465	22407	465	21304	465	20854	465	21103
466	22416	466	22380	466	21952	466	21142	466	20765	466	20931
467	22155	467	21950	467	21762	467	20832	467	20302	467	20703
468	21500	468	21315	468	20758	468	20252	468	20136	468	20096
469	21497	469	21424	469	20778	469	19890	469	19439	469	19846
470	20943	470	20718	470	20236	470	19498	470	18938	470	19203
471	20464	471	20676	471	19706	471	19334	471	18897	471	19012
472	20051	472	20189	472	19492	472	18774	472	18634	472	18672
473	19819	473	19596	473	19468	473	18343	473	18134	473	18286
474	19351	474	19068	474	18698	474	18176	474	17862	474	18014
475	18926	475	18820	475	18327	475	17956	475	17279	475	17529
476	18738	476	18582	476	18177	476	17435	476	17190	476	17297
477	18065	477	18099	477	17730	477	16965	477	16644	477	16794
478	17960	478	17907	478	17561	478	16624	478	16332	478	16377
479	17732	479	17343	479	17076	479	16428	479	16299	479	16106
480	17125	480	16872	480	16686	480	16210	480	15335	480	16013
481	16607	481	16666	481	16181	481	15742	481	15435	481	15622
482	16167	482	16108	482	15842	482	15305	482	14945	482	15122
483	15724	483	15829	483	15661	483	14741	483	14675	483	14791
484	15607	484	15669	484	15042	484	14509	484	14060	484	14491
485	15288	485	15169	485	14724	485	14391	485	14025	485	13904
486	14885	486	14938	486	14219	486	13950	486	13469	486	13729
487	14648	487	14398	487	14083	487	13703	487	13083	487	13702
488	14163	488	14080	488	13620	488	13203	488	12924	488	13266
489	13775	489	13580	489	13547	489	12847	489	12567	489	12840
490	13550	490	13413	490	12947	490	12460	490	12428	490	12485
491	13195	491	13190	491	12778	491	12364	491	12064	491	12103
492	12868	492	12632	492	12389	492	12041	492	11626	492	11707
493	12493	493	12448	493	12116	493	11721	493	11292	493	11419
494	12258	494	12078	494	11607	494	11136	494	10993	494	11192
495	12041	495	11927	495	11474	495	11062	495	10726	495	10812
496	11601	496	11374	496	11131	496	10961	496	10369	496	10532
497	11269	497	11087	497	10872	497	10147	497	10100	497	10064
498	10872	498	10810	498	10685	498	9948	498	9775	498	9822
499	10575	499	10383	499	10172	499	9749	499	9377	499	9739
500	10058	500	10113	500	9847	500	9583	500	9286	500	9351
501	9923	501	9794	501	9703	501	9244	501	9032	501	9214
502	9645	502	9493	502	9239	502	8952	502	8667	502	8872
503	9388	503	9291	503	9229	503	8508	503	8345	503	8522
504	9128	504	9196	504	8880	504	8457	504	8015	504	8282
505	8885	505	8732	505	8514	505	8086	505	7946	505	8113
506	8588	506	8480	506	8086	506	8081	506	7903	506	7719
507	8327	507	8121	507	7953	507	7720	507	7492	507	7670
508	8119	508	8063	508	7871	508	7305	508	7170	508	7312
509	7791	509	7953	509	7498	509	7309	509	7157	509	7130
510	7631	510	7503	510	7359	510	6998	510	6994	510	6655
511	7299	511	7389	511	7133	511	6720	511	6606	511	6763
512	7160	512	7168	512	6839	512	6591	512	6359	512	6492
513	6970	513	6788	513	6573	513	6343	513	6091	513	6375
514	6640	514	6561	514	6566	514	6111	514	6072	514	6004
515	6428	515	6506	515	6158	515	6031	515	5966	515	6022
516	6360	516	6142	516	6021	516	5839	516	5643	516	5755
517	6027	517	5929	517	5719	517	5770	517	5419	517	5539
518	5904	518	5735	518	5531	518	5536	518	5357	518	5361
519	5685	519	5597	519	5518	519	5068	519	5346	519	5104
520	5420	520	5408	520	5379	520	5106	520	4943	520	5075
521	5311	521	5378	521	5102	521	4889	521	4847	521	4819
522	5131	522	4995	522	4941	522	4832	522	4737	522	4713
523	5007	523	4941	523	4844	523	4637	523	4461	523	4616
524	4761	524	4701	524	4580	524	4587	524	4466	524	4519
525	4716	525	4594	525	4613	525	4299	525	4332	525	4211
526	4621	526	4504	526	4437	526	4315	526	4022	526	4154
527	4497	527	4277	527	4300	527	4201	527	3926	527	4035
528	4229	528	4198	528	4104	528	3928	528	3794	528	3908
529	3999	529	4017	529	3993	529	3732	529	3579	529	3701
530	3945	530	3823	530	3747	530	3659	530	3595	530	3605
531	3876	531	3806	531	3666	531	3549	531	3367	531	3516
532	3719	532	3712	532	3525	532	3425	532	3367	532	3360
533	3588	533	3503	533	3486	533	3289	533	3188	533	3131
534	3428	534	3417	534	3363	534	3233	534	3073	534	3093
535	3355	535	3321	535	3282	535	3040	535	2950	535	3068
536	3140	536	3137	536	3156	536	3010	536	2976	536	3024
537	3085	537	3103	537	2966	537	2958	537	2879	537	2856
538	3025	538	2988	538	2908	538	2764	538	2679	538	2762
539	2883	539	2962	539	2798	539	2638	539	2632	539	2554
540	2816	540	2766	540	2692	540	2643	540	2517	540	2737
541	2654	541	2655	541	2752	541	2421	541	2409	541	2488
542	2594	542	2541	542	2526	542	2469	542	2353	542	2312
543	2493	543	2414	543	2295	543	2381	543	2251	543	2311
544	2302	544	2428	544	2253	544	2230	544	2241	544	2198
545	2430	545	2286	545	2226	545	2209	545	2121	545	2140
546	2300	546	2343	546	2183	546	2144	546	2072	546	2089
547	2178	547	2206	547	2119	547	2062	547	1972	547	2029
548	2105	548	2099	548	1989	548	1985	548	1956	548	1909
549	2028	549	2023	549	1957	549	1922	549	1819	549	1783
550	2003	550	1869	550	1847	550	1796	550	1801	550	1767
551	1908	551	1814	551	1806	551	1844	551	1759	551	1729
552	1868	552	1885	552	1748	552	1799	552	1536	552	1662
553	1799	553	1794	553	1705	553	1710	553	1635	553	1640
554	1681	554	1675	554	1581	554	1606	554	1502	554	1498
555	1708	555	1571	555	1632	555	1504	555	1469	555	1475
556	1596	556	1558	556	1570	556	1415	556	1440	556	1484
557	1629	557	1545	557	1457	557	1454	557	1382	557	1395
558	1539	558	1509	558	1438	558	1381	558	1378	558	1339
559	1466	559	1429	559	1395	559	1353	559	1265	559	1277
560	1385	560	1423	560	1344	560	1337	560	1233	560	1250
561	1346	561	1341	561	1315	561	1210	561	1196	561	1192
562	1312	562	1347	562	1194	562	1184	562	1177	562	1263
563	1309	563	1172	563	1236	563	1140	563	1167	563	1100
564	1256	564	1178	564	1144	564	1183	564	1085	564	1099
565	1172	565	1093	565	1129	565	1120	565	990	565	1071
566	1183	566	1163	566	1116	566	1116	566	1047	566	991
567	1167	567	1086	567	1015	567	1012	567	1012	567	968
568	1072	568	1070	568	1067	568	1070	568	936	568	983
569	1012	569	1009	569	1022	569	983	569	957	569	942
570	1000	570	1017	570	958	570	978	570	867	570	919
571	975	571	915	571	923	571	889	571	868	571	883
572	965	572	893	572	902	572	898	572	817	572	872
573	949	573	863	573	891	573	786	573	874	573	799
574	940	574	882	574	831	574	836	574	805	574	813
575	878	575	902	575	886	575	784	575	765	575	813
576	830	576	792	576	798	576	806	576	791	576	731
577	798	577	759	577	776	577	748	577	704	577	737
578	781	578	781	578	723	578	687	578	698	578	708
579	796	579	949	579	765	579	724	579	663	579	655
580	749	580	757	580	685	580	701	580	673	580	641
581	687	581	702	581	705	581	656	581	654	581	682
582	724	582	685	582	679	582	661	582	654	582	575
583	686	583	639	583	673	583	664	583	641	583	664
584	680	584	642	584	637	584	573	584	598	584	587
585	603	585	614	585	632	585	582	585	562	585	548
586	569	586	574	586	594	586	612	586	533	586	514
587	583	587	564	587	562	587	556	587	576	587	529
588	533	588	572	588	513	588	531	588	525	588	495
589	574	589	552	589	578	589	551	589	501	589	493
590	512	590	538	590	548	590	492	590	490	590	497
591	494	591	528	591	495	591	464	591	484	591	472
592	517	592	494	592	518	592	473	592	461	592	442
593	478	593	498	593	489	593	439	593	418	593	471
594	491	594	456	594	438	594	456	594	431	594	425
595	475	595	448	595	453	595	430	595	396	595	432
596	431	596	391	596	448	596	396	596	414	596	409
597	426	597	431	597	429	597	401	597	355	597	392
598	443	598	406	598	423	598	400	598	367	598	413
599	378	599	446	599	410	599	360	599	351	599	382
600	396	600	353	600	382	600	371	600	345	600	372
601	387	601	412	601	404	601	403	601	336	601	345
602	345	602	349	602	365	602	348	602	364	602	361
603	357	603	339	603	361	603	345	603	306	603	336
604	368	604	374	604	350	604	304	604	331	604	332
605	352	605	350	605	360	605	320	605	315	605	318
606	387	606	331	606	308	606	311	606	313	606	341
607	316	607	302	607	293	607	268	607	289	607	297
608	352	608	318	608	315	608	300	608	283	608	277
609	291	609	289	609	284	609	287	609	249	609	266
610	288	610	291	610	270	610	269	610	266	610	264
611	258	611	287	611	262	611	293	611	257	611	286
612	275	612	316	612	269	612	271	612	255	612	246
613	267	613	259	613	237	613	248	613	246	613	246
614	271	614	249	614	255	614	253	614	269	614	235
615	232	615	245	615	223	615	218	615	233	615	220
616	238	616	279	616	242	616	208	616	197	616	214
617	238	617	240	617	232	617	207	617	223	617	224
618	252	618	230	618	187	618	228	618	204	618	207
619	201	619	260	619	214	619	243	619	208	619	201
620	228	620	222	620	219	620	209	620	194	620	210
621	236	621	240	621	186	621	221	621	182	621	208
622	164	622	198	622	170	622	189	622	188	622	210
623	209	623	184	623	163	623	189	623	160	623	169
624	202	624	196	624	191	624	209	624	190	624	158
625	211	625	186	625	181	625	209	625	163	625	186
626	173	626	173	626	173	626	176	626	183	626	167
627	180	627	173	627	186	627	155	627	161	627	157
628	168	628	170	628	159	628	160	628	161	628	162
629	189	629	156	629	177	629	160	629	149	629	177
630	178	630	153	630	156	630	159	630	145	630	147
631	159	631	160	631	144	631	150	631	162	631	160
632	159	632	168	632	167	632	154	632	141	632	123
633	159	633	137	633	167	633	150	633	136	633	148
634	146	634	156	634	148	634	134	634	141	634	144
635	148	635	124	635	147	635	140	635	142	635	137
636	127	636	122	636	155	636	128	636	149	636	129
637	124	637	136	637	138	637	124	637	118	637	137
638	132	638	121	638	129	638	146	638	113	638	121
639	156	639	143	639	123	639	136	639	126	639	123
640	130	640	138	640	136	640	132	640	118	640	127
641	130	641	123	641	115	641	120	641	127	641	129
642	137	642	141	642	118	642	127	642	107	642	123
643	138	643	129	643	118	643	116	643	101	643	106
644	124	644	99	644	112	644	120	644	126	644	112
645	105	645	102	645	117	645	130	645	105	645	109
646	118	646	131	646	102	646	114	646	128	646	122
647	115	647	108	647	119	647	114	647	106	647	123
648	111	648	115	648	101	648	111	648	91	648	104
649	93	649	106	649	112	649	102	649	109	649	97
650	119	650	109	650	116	650	93	650	103	650	95
651	104	651	121	651	109	651	95	651	83	651	99
652	89	652	94	652	116	652	93	652	80	652	95
653	97	653	105	653	86	653	101	653	94	653	111
654	102	654	117	654	101	654	92	654	93	654	72
655	98	655	101	655	94	655	88	655	87	655	99
656	100	656	98	656	80	656	95	656	88	656	75
657	100	657	90	657	95	657	95	657	81	657	100
658	87	658	82	658	83	658	103	658	95	658	73
659	88	659	83	659	82	659	71	659	92	659	73
660	86	660	107	660	88	660	84	660	83	660	100
661	96	661	84	661	69	661	75	661	74	661	69
662	84	662	68	662	81	662	77	662	67	662	52
663	72	663	61	663	75	663	78	663	72	663	76
664	69	664	81	664	81	664	92	664	76	664	87
665	88	665	81	665	93	665	88	665	75	665	83
666	85	666	70	666	76	666	90	666	78	666	68
667	72	667	89	667	77	667	72	667	73	667	88
668	69	668	69	668	70	668	71	668	80	668	66
669	77	669	73	669	69	669	59	669	70	669	64
670	71	670	69	670	74	670	72	670	63	670	70
671	80	671	79	671	65	671	66	671	65	671	74
672	91	672	65	672	59	672	73	672	66	672	79
673	81	673	88	673	50	673	60	673	86	673	66
674	73	674	72	674	63	674	78	674	67	674	80
675	78	675	70	675	58	675	59	675	65	675	68
676	64	676	58	676	78	676	61	676	67	676	76
677	85	677	70	677	63	677	64	677	45	677	70
678	72	678	68	678	70	678	59	678	53	678	62
679	75	679	66	679	63	679	54	679	64	679	69
680	63	680	75	680	66	680	56	680	47	680	67
