# Supplementary material for: In-depth chiral sensing capability of C-dots in a biomimetic protein-based hydrogel: a probe for chiral recognition applications
Source: Royal Society of Chemistry journal article supplement (doi:10.1039/d5bm01508a), 2026-01-01
Supplement: d5bm01508a1.zip [file Figure S16.xlsx]

## Sheet: Figure S16(a)
365	60	365	44	365	45	365	49	365	41	365	34
366	61	366	65	366	46	366	41	366	38	366	47
367	54	367	47	367	44	367	36	367	43	367	22
368	66	368	67	368	53	368	61	368	54	368	28
369	77	369	53	369	59	369	62	369	59	369	33
370	70	370	75	370	56	370	46	370	50	370	38
371	92	371	63	371	62	371	67	371	53	371	36
372	75	372	70	372	55	372	74	372	56	372	40
373	105	373	64	373	65	373	85	373	73	373	49
374	126	374	72	374	55	374	76	374	74	374	39
375	133	375	91	375	73	375	109	375	109	375	38
376	140	376	90	376	103	376	101	376	81	376	40
377	177	377	132	377	92	377	114	377	98	377	42
378	202	378	124	378	123	378	138	378	125	378	35
379	232	379	147	379	148	379	142	379	156	379	50
380	260	380	197	380	168	380	171	380	179	380	66
381	315	381	245	381	187	381	207	381	181	381	69
382	387	382	229	382	258	382	257	382	229	382	84
383	459	383	287	383	304	383	278	383	260	383	72
384	603	384	356	384	322	384	333	384	305	384	113
385	713	385	444	385	389	385	414	385	380	385	117
386	782	386	507	386	479	386	530	386	441	386	143
387	968	387	591	387	563	387	618	387	522	387	212
388	1147	388	740	388	664	388	714	388	592	388	221
389	1365	389	884	389	789	389	869	389	748	389	282
390	1561	390	1024	390	1007	390	967	390	838	390	360
391	1840	391	1258	391	1184	391	1188	391	1039	391	461
392	2197	392	1498	392	1304	392	1437	392	1207	392	560
393	2567	393	1738	393	1612	393	1605	393	1493	393	670
394	2924	394	1964	394	1801	394	1980	394	1635	394	767
395	3385	395	2442	395	2101	395	2162	395	1961	395	920
396	3849	396	2706	396	2513	396	2476	396	2215	396	1088
397	4368	397	3119	397	2856	397	2923	397	2563	397	1361
398	4906	398	3542	398	3248	398	3276	398	2920	398	1634
399	5555	399	4171	399	3842	399	3731	399	3181	399	1918
400	6240	400	4611	400	4321	400	4215	400	3642	400	2218
401	6801	401	5069	401	4802	401	4847	401	4002	401	2573
402	7670	402	5692	402	5421	402	5358	402	4660	402	2967
403	8547	403	6234	403	5828	403	5854	403	5064	403	3282
404	9313	404	7031	404	6493	404	6396	404	5506	404	3770
405	10191	405	7605	405	7232	405	7064	405	6108	405	4239
406	10665	406	8404	406	7806	406	7462	406	6671	406	4720
407	11637	407	9042	407	8372	407	8108	407	7168	407	5231
408	12464	408	9823	408	9061	408	8697	408	7885	408	5800
409	13258	409	10536	409	9874	409	9399	409	8326	409	6102
410	14073	410	11326	410	10554	410	9967	410	8878	410	6765
411	15203	411	12029	411	11215	411	10570	411	9594	411	7220
412	15659	412	12630	412	11712	412	11354	412	10208	412	7514
413	16580	413	13549	413	12555	413	11806	413	10740	413	8223
414	17484	414	13960	414	13071	414	12539	414	11031	414	8589
415	18243	415	14835	415	13824	415	13079	415	11557	415	9134
416	19025	416	15419	416	14565	416	13729	416	12269	416	9490
417	19930	417	16305	417	15135	417	14071	417	12798	417	10086
418	20543	418	16691	418	15704	418	14955	418	13157	418	10444
419	21294	419	17585	419	16185	419	15581	419	13681	419	11012
420	21927	420	18064	420	16886	420	16100	420	14364	420	11427
421	23137	421	18713	421	17516	421	16860	421	14450	421	11745
422	23857	422	19263	422	18129	422	16727	422	15300	422	12049
423	23938	423	19920	423	18775	423	17528	423	15502	423	12604
424	24687	424	20248	424	19211	424	17988	424	15946	424	12868
425	25250	425	20915	425	19572	425	18427	425	16318	425	13334
426	25623	426	21579	426	20328	426	18943	426	16607	426	13605
427	26947	427	22114	427	20546	427	19597	427	17184	427	13918
428	26890	428	22692	428	21047	428	20042	428	17393	428	14259
429	27531	429	23003	429	21607	429	20353	429	17725	429	14534
430	28010	430	23355	430	22273	430	20683	430	18342	430	14750
431	28639	431	23718	431	22420	431	20730	431	18519	431	15150
432	28743	432	24221	432	22629	432	21491	432	18433	432	15420
433	29041	433	24629	433	22822	433	21428	433	19097	433	15795
434	29743	434	24775	434	23183	434	21663	434	19208	434	15688
435	29705	435	25288	435	23565	435	22209	435	19609	435	16149
436	30344	436	25147	436	23811	436	22065	436	19560	436	16325
437	30502	437	25274	437	24054	437	22301	437	19883	437	16439
438	30537	438	25879	438	24050	438	22616	438	20066	438	16494
439	30674	439	25877	439	24596	439	23086	439	20142	439	16531
440	30661	440	26387	440	24754	440	23012	440	20495	440	16728
441	30971	441	26397	441	24818	441	22981	441	20557	441	17369
442	31153	442	26716	442	24803	442	23379	442	20596	442	16837
443	31161	443	27046	443	24927	443	23371	443	20915	443	17365
444	31261	444	26674	444	25153	444	23520	444	20947	444	17239
445	31239	445	26717	445	25222	445	23510	445	21090	445	17675
446	31257	446	26818	446	24774	446	23458	446	21072	446	17405
447	31039	447	26765	447	25040	447	23388	447	21027	447	17359
448	31177	448	26966	448	25039	448	23308	448	21184	448	17346
449	31266	449	26946	449	24982	449	23563	449	20985	449	17178
450	30510	450	26522	450	24648	450	23388	450	20968	450	17556
451	30989	451	26705	451	24879	451	23620	451	20663	451	17155
452	30253	452	26392	452	24665	452	23005	452	20755	452	17379
453	30233	453	26402	453	24363	453	23059	453	20763	453	17273
454	30052	454	26134	454	24287	454	22723	454	20442	454	17186
455	29692	455	25640	455	24122	455	22533	455	20319	455	16650
456	29515	456	25615	456	23799	456	22721	456	19912	456	16825
457	29155	457	25537	457	23616	457	22019	457	19846	457	16739
458	28528	458	25019	458	23276	458	21902	458	19752	458	16427
459	28225	459	24950	459	23372	459	21584	459	19575	459	16363
460	27780	460	24296	460	22787	460	21477	460	19193	460	16017
461	27656	461	24629	461	22595	461	21050	461	18948	461	15670
462	27291	462	24015	462	22137	462	21017	462	18730	462	15811
463	27006	463	24046	463	22047	463	20704	463	18415	463	15576
464	26662	464	23206	464	21902	464	20264	464	18199	464	15328
465	26068	465	22820	465	21304	465	20152	465	17959	465	15031
466	25516	466	22416	466	21142	466	19652	466	17885	466	14986
467	25132	467	22155	467	20832	467	19343	467	17354	467	14608
468	24786	468	21500	468	20252	468	18922	468	17298	468	14402
469	24221	469	21497	469	19890	469	18740	469	16847	469	14249
470	23588	470	20943	470	19498	470	18452	470	16471	470	13856
471	23170	471	20464	471	19334	471	17951	471	16317	471	13551
472	22451	472	20051	472	18774	472	17732	472	15983	472	13423
473	22449	473	19819	473	18343	473	17324	473	15705	473	13122
474	21657	474	19351	474	18176	474	17085	474	15346	474	12919
475	21426	475	18926	475	17956	475	16681	475	14915	475	12824
476	20719	476	18738	476	17435	476	16415	476	14528	476	12258
477	20393	477	18065	477	16965	477	15781	477	14678	477	12201
478	19797	478	17960	478	16624	478	15739	478	14128	478	11792
479	19511	479	17732	479	16428	479	15228	479	14015	479	11716
480	18755	480	17125	480	16210	480	15102	480	13552	480	11496
481	18473	481	16607	481	15742	481	14811	481	13222	481	11281
482	18341	482	16167	482	15305	482	14387	482	13062	482	10932
483	17574	483	15724	483	14741	483	14081	483	12637	483	10628
484	17333	484	15607	484	14509	484	13651	484	12684	484	10569
485	16962	485	15288	485	14391	485	13355	485	12057	485	10160
486	16697	486	14885	486	13950	486	13184	486	11827	486	9871
487	16095	487	14648	487	13703	487	12627	487	11582	487	9713
488	15581	488	14163	488	13203	488	12456	488	11328	488	9501
489	15543	489	13775	489	12847	489	12350	489	10910	489	9171
490	14921	490	13550	490	12460	490	11928	490	10835	490	9026
491	14464	491	13195	491	12364	491	11392	491	10479	491	8731
492	14026	492	12868	492	12041	492	11134	492	10321	492	8618
493	13778	493	12493	493	11721	493	10904	493	9934	493	8464
494	13393	494	12258	494	11136	494	10507	494	9661	494	8028
495	13042	495	12041	495	11062	495	10341	495	9424	495	7959
496	12578	496	11601	496	10961	496	9930	496	9176	496	7577
497	12429	497	11269	497	10147	497	9633	497	8870	497	7626
498	12233	498	10872	498	9948	498	9493	498	8723	498	7238
499	11719	499	10575	499	9749	499	9261	499	8419	499	7098
500	11174	500	10058	500	9583	500	8845	500	8140	500	6901
501	10991	501	9923	501	9244	501	8811	501	7806	501	6642
502	10312	502	9645	502	8952	502	8294	502	7823	502	6646
503	10268	503	9388	503	8508	503	8064	503	7449	503	6234
504	9953	504	9128	504	8457	504	8012	504	7387	504	6150
505	9577	505	8885	505	8086	505	7755	505	7064	505	5731
506	9285	506	8588	506	8081	506	7487	506	6781	506	5854
507	9142	507	8327	507	7720	507	7190	507	6520	507	5604
508	8781	508	8119	508	7305	508	7033	508	6293	508	5526
509	8536	509	7791	509	7309	509	6896	509	6302	509	5151
510	8182	510	7631	510	6998	510	6672	510	6056	510	5099
511	7938	511	7299	511	6720	511	6314	511	5858	511	5036
512	7762	512	7160	512	6591	512	6298	512	5821	512	4936
513	7342	513	6970	513	6343	513	6064	513	5527	513	4633
514	7090	514	6640	514	6111	514	5827	514	5353	514	4523
515	7112	515	6428	515	6031	515	5547	515	5229	515	4374
516	6756	516	6360	516	5839	516	5464	516	5097	516	4331
517	6583	517	6027	517	5770	517	5235	517	4855	517	4040
518	6465	518	5904	518	5536	518	5157	518	4830	518	3974
519	6232	519	5685	519	5068	519	4906	519	4649	519	3872
520	5946	520	5420	520	5106	520	4853	520	4454	520	3801
521	5702	521	5311	521	4889	521	4623	521	4386	521	3711
522	5499	522	5131	522	4832	522	4547	522	4047	522	3602
523	5421	523	5007	523	4637	523	4285	523	3874	523	3462
524	5169	524	4761	524	4587	524	4307	524	3918	524	3403
525	4883	525	4716	525	4299	525	4085	525	3758	525	3173
526	4921	526	4621	526	4315	526	3943	526	3631	526	3145
527	4649	527	4497	527	4201	527	3755	527	3441	527	3081
528	4579	528	4229	528	3928	528	3792	528	3412	528	2902
529	4373	529	3999	529	3732	529	3657	529	3280	529	2791
530	4181	530	3945	530	3659	530	3500	530	3191	530	2715
531	4111	531	3876	531	3549	531	3420	531	3051	531	2560
532	3954	532	3719	532	3425	532	3262	532	3044	532	2434
533	3724	533	3588	533	3289	533	3143	533	2870	533	2440
534	3645	534	3428	534	3233	534	2950	534	2858	534	2404
535	3472	535	3355	535	3040	535	2926	535	2654	535	2296
536	3436	536	3140	536	3010	536	2694	536	2539	536	2303
537	3344	537	3085	537	2958	537	2692	537	2537	537	2177
538	3212	538	3025	538	2764	538	2639	538	2435	538	2074
539	3007	539	2883	539	2638	539	2522	539	2386	539	1986
540	3124	540	2816	540	2643	540	2844	540	2298	540	1880
541	2784	541	2654	541	2421	541	2371	541	2179	541	1851
542	2662	542	2594	542	2469	542	2261	542	2055	542	1728
543	2618	543	2493	543	2381	543	2203	543	1992	543	1760
544	2565	544	2302	544	2230	544	2169	544	1941	544	1689
545	2472	545	2430	545	2209	545	2011	545	1893	545	1633
546	2439	546	2300	546	2144	546	2025	546	1961	546	1600
547	2287	547	2178	547	2062	547	1993	547	1735	547	1588
548	2221	548	2105	548	1985	548	1863	548	1709	548	1524
549	2105	549	2028	549	1922	549	1738	549	1670	549	1428
550	2134	550	2003	550	1796	550	1652	550	1693	550	1314
551	1972	551	1908	551	1844	551	1708	551	1575	551	1341
552	2008	552	1868	552	1799	552	1645	552	1523	552	1312
553	1858	553	1799	553	1710	553	1599	553	1448	553	1240
554	1840	554	1681	554	1606	554	1492	554	1408	554	1194
555	1779	555	1708	555	1504	555	1419	555	1431	555	1122
556	1740	556	1596	556	1415	556	1501	556	1346	556	1122
557	1617	557	1629	557	1454	557	1311	557	1201	557	1087
558	1534	558	1539	558	1381	558	1379	558	1182	558	1021
559	1533	559	1466	559	1353	559	1238	559	1183	559	994
560	1477	560	1385	560	1337	560	1206	560	1222	560	975
561	1418	561	1346	561	1210	561	1163	561	1157	561	989
562	1409	562	1312	562	1184	562	1188	562	1062	562	887
563	1247	563	1309	563	1140	563	1183	563	1055	563	859
564	1249	564	1256	564	1183	564	1100	564	1051	564	918
565	1290	565	1172	565	1120	565	1073	565	984	565	886
566	1263	566	1183	566	1116	566	1043	566	1016	566	829
567	1165	567	1167	567	1012	567	989	567	941	567	781
568	1157	568	1072	568	1070	568	977	568	945	568	773
569	1082	569	1012	569	983	569	942	569	878	569	675
570	1012	570	1000	570	978	570	877	570	852	570	723
571	1017	571	975	571	889	571	812	571	799	571	683
572	981	572	965	572	898	572	870	572	784	572	703
573	909	573	949	573	786	573	772	573	778	573	667
574	974	574	940	574	836	574	801	574	695	574	621
575	890	575	878	575	784	575	749	575	715	575	590
576	869	576	830	576	806	576	762	576	727	576	597
577	866	577	798	577	748	577	708	577	685	577	592
578	758	578	781	578	687	578	693	578	644	578	555
579	823	579	796	579	724	579	644	579	634	579	559
580	799	580	749	580	701	580	679	580	675	580	558
581	734	581	687	581	656	581	613	581	620	581	526
582	712	582	724	582	661	582	594	582	576	582	440
583	744	583	686	583	664	583	549	583	578	583	461
584	700	584	680	584	573	584	559	584	524	584	448
585	652	585	603	585	582	585	611	585	514	585	437
586	581	586	569	586	612	586	521	586	468	586	433
587	589	587	583	587	556	587	529	587	518	587	448
588	581	588	533	588	531	588	517	588	491	588	410
589	600	589	574	589	551	589	462	589	470	589	406
590	563	590	512	590	492	590	471	590	455	590	352
591	551	591	494	591	464	591	469	591	473	591	337
592	535	592	517	592	473	592	433	592	406	592	409
593	498	593	478	593	439	593	426	593	452	593	324
594	495	594	491	594	456	594	440	594	419	594	344
595	491	595	475	595	430	595	413	595	376	595	321
596	457	596	431	596	396	596	430	596	397	596	336
597	438	597	426	597	401	597	400	597	366	597	319
598	446	598	443	598	400	598	365	598	372	598	288
599	421	599	378	599	360	599	369	599	361	599	279
600	379	600	396	600	371	600	346	600	327	600	282
601	390	601	387	601	403	601	357	601	333	601	297
602	382	602	345	602	348	602	356	602	338	602	269
603	342	603	357	603	345	603	342	603	306	603	266
604	356	604	368	604	304	604	345	604	334	604	283
605	323	605	352	605	320	605	327	605	307	605	259
606	308	606	387	606	311	606	314	606	317	606	226
607	377	607	316	607	268	607	315	607	291	607	242
608	329	608	352	608	300	608	267	608	294	608	233
609	297	609	291	609	287	609	254	609	253	609	239
610	254	610	288	610	269	610	272	610	260	610	230
611	270	611	258	611	293	611	273	611	236	611	223
612	277	612	275	612	271	612	229	612	234	612	196
613	280	613	267	613	248	613	243	613	261	613	201
614	281	614	271	614	253	614	236	614	226	614	182
615	277	615	232	615	218	615	241	615	195	615	167
616	238	616	238	616	208	616	225	616	199	616	155
617	258	617	238	617	207	617	239	617	238	617	157
618	228	618	252	618	228	618	221	618	220	618	176
619	234	619	201	619	243	619	174	619	179	619	166
620	244	620	228	620	209	620	181	620	184	620	164
621	216	621	236	621	221	621	184	621	182	621	136
622	211	622	164	622	189	622	199	622	201	622	135
623	200	623	209	623	189	623	187	623	189	623	153
624	204	624	202	624	209	624	164	624	171	624	144
625	203	625	211	625	209	625	214	625	150	625	138
626	172	626	173	626	176	626	190	626	156	626	128
627	160	627	180	627	155	627	177	627	154	627	124
628	195	628	168	628	160	628	151	628	151	628	123
629	154	629	189	629	160	629	154	629	159	629	103
630	142	630	178	630	159	630	147	630	147	630	136
631	161	631	159	631	150	631	138	631	138	631	110
632	149	632	159	632	154	632	155	632	161	632	99
633	152	633	159	633	150	633	133	633	127	633	112
634	153	634	146	634	134	634	130	634	123	634	101
635	147	635	148	635	140	635	139	635	118	635	95
636	154	636	127	636	128	636	145	636	121	636	108
637	117	637	124	637	124	637	134	637	108	637	99
638	145	638	132	638	146	638	124	638	130	638	102
639	115	639	156	639	136	639	115	639	106	639	82
640	119	640	130	640	132	640	103	640	93	640	104
641	115	641	130	641	120	641	122	641	112	641	88
642	120	642	137	642	127	642	101	642	106	642	83
643	122	643	138	643	116	643	120	643	106	643	79
644	102	644	124	644	120	644	121	644	113	644	72
645	105	645	105	645	130	645	85	645	84	645	89
646	126	646	118	646	114	646	94	646	104	646	91
647	104	647	115	647	114	647	109	647	111	647	98
648	95	648	111	648	111	648	98	648	80	648	78
649	127	649	93	649	102	649	102	649	101	649	82
650	94	650	119	650	93	650	79	650	87	650	72
651	85	651	104	651	95	651	99	651	102	651	79
652	128	652	89	652	93	652	110	652	89	652	74
653	96	653	97	653	101	653	95	653	90	653	77
654	102	654	102	654	92	654	91	654	91	654	66
655	99	655	98	655	88	655	74	655	86	655	71
656	88	656	100	656	95	656	82	656	82	656	62
657	71	657	100	657	95	657	63	657	80	657	68
658	92	658	87	658	103	658	75	658	69	658	60
659	80	659	88	659	71	659	81	659	63	659	63
660	76	660	86	660	84	660	71	660	69	660	72
661	81	661	96	661	75	661	69	661	72	661	60
662	74	662	84	662	77	662	72	662	83	662	55
663	66	663	72	663	78	663	88	663	67	663	58
664	67	664	69	664	92	664	57	664	73	664	58
665	74	665	88	665	88	665	61	665	75	665	55
666	74	666	85	666	90	666	68	666	70	666	60
667	63	667	72	667	72	667	73	667	67	667	50
668	51	668	69	668	71	668	65	668	63	668	52
669	39	669	77	669	59	669	67	669	57	669	61
670	73	670	71	670	72	670	64	670	63	670	50
671	68	671	80	671	66	671	81	671	58	671	54
672	52	672	91	672	73	672	75	672	58	672	56
673	66	673	81	673	60	673	57	673	59	673	64
674	62	674	73	674	78	674	79	674	49	674	48
675	74	675	78	675	59	675	58	675	41	675	49
676	61	676	64	676	61	676	63	676	67	676	45
677	53	677	85	677	64	677	60	677	61	677	31
678	60	678	72	678	59	678	76	678	55	678	32
679	46	679	75	679	54	679	47	679	61	679	45
680	62	680	63	680	56	680	49	680	57	680	48

## Sheet: Figure S16(b)
365	41	365	42	365	42	365	43	365	54	365	38
366	49	366	52	366	53	366	56	366	53	366	50
367	44	367	55	367	61	367	46	367	48	367	51
368	61	368	51	368	59	368	59	368	61	368	55
369	43	369	62	369	52	369	73	369	60	369	66
370	51	370	54	370	55	370	61	370	63	370	61
371	63	371	61	371	70	371	71	371	46	371	49
372	70	372	67	372	73	372	76	372	46	372	62
373	69	373	60	373	62	373	59	373	68	373	66
374	86	374	73	374	67	374	88	374	80	374	56
375	93	375	79	375	101	375	83	375	76	375	87
376	105	376	95	376	98	376	99	376	95	376	92
377	111	377	96	377	116	377	122	377	128	377	100
378	151	378	132	378	130	378	120	378	116	378	103
379	130	379	152	379	158	379	153	379	148	379	154
380	196	380	174	380	163	380	195	380	159	380	158
381	199	381	191	381	205	381	210	381	205	381	180
382	242	382	239	382	243	382	259	382	225	382	240
383	280	383	269	383	309	383	298	383	271	383	279
384	363	384	343	384	349	384	376	384	330	384	346
385	423	385	397	385	438	385	431	385	384	385	389
386	511	386	513	386	520	386	492	386	492	386	487
387	574	387	562	387	585	387	695	387	587	387	565
388	698	388	667	388	696	388	762	388	751	388	652
389	919	389	830	389	910	389	875	389	782	389	775
390	1015	390	1019	390	961	390	1101	390	1026	390	917
391	1235	391	1247	391	1282	391	1225	391	1231	391	1164
392	1425	392	1433	392	1411	392	1435	392	1356	392	1336
393	1636	393	1683	393	1627	393	1726	393	1669	393	1594
394	1977	394	1953	394	1949	394	1975	394	1847	394	1818
395	2377	395	2290	395	2422	395	2450	395	2197	395	2191
396	2668	396	2649	396	2579	396	2779	396	2542	396	2464
397	3111	397	3051	397	3035	397	3118	397	3036	397	2808
398	3558	398	3414	398	3658	398	3653	398	3388	398	3276
399	4020	399	4077	399	3899	399	4041	399	3797	399	3800
400	4574	400	4476	400	4588	400	4673	400	4406	400	4304
401	5070	401	5006	401	5087	401	4987	401	4989	401	4757
402	5605	402	5612	402	5629	402	5586	402	5605	402	5246
403	6184	403	6167	403	6283	403	6247	403	6246	403	5817
404	7008	404	6947	404	6921	404	7048	404	6766	404	6475
405	7641	405	7609	405	7574	405	7703	405	7317	405	7067
406	8355	406	8204	406	8164	406	8368	406	7943	406	7549
407	8881	407	9013	407	8904	407	9099	407	8519	407	8379
408	9802	408	9807	408	9747	408	9762	408	9222	408	9166
409	10380	409	10173	409	10268	409	10467	409	9938	409	9615
410	11182	410	11068	410	10784	410	11093	410	10735	410	10177
411	11733	411	11716	411	11810	411	11793	411	11273	411	11297
412	12484	412	12353	412	12425	412	12573	412	11959	412	11569
413	13288	413	13063	413	13047	413	13370	413	12790	413	12511
414	13934	414	13923	414	13968	414	14003	414	13372	414	12829
415	14644	415	14568	415	14492	415	14749	415	14113	415	13607
416	15314	416	15259	416	15153	416	15301	416	14777	416	14176
417	16360	417	16010	417	15628	417	16280	417	15467	417	14736
418	16762	418	16501	418	16649	418	16662	418	15884	418	15359
419	17379	419	17210	419	16921	419	17479	419	16545	419	16059
420	17898	420	17995	420	17851	420	17821	420	17064	420	16679
421	18867	421	18466	421	18144	421	18583	421	17906	421	17333
422	19185	422	18975	422	19014	422	18958	422	18127	422	17743
423	20030	423	19841	423	19592	423	19845	423	18832	423	18535
424	20339	424	20027	424	19768	424	20316	424	19477	424	18967
425	20966	425	20826	425	20364	425	20647	425	19932	425	19246
426	21410	426	20824	426	21124	426	21030	426	20292	426	19859
427	21534	427	21585	427	21470	427	21719	427	20768	427	20366
428	22322	428	22171	428	21779	428	22294	428	21215	428	20996
429	22934	429	22529	429	22598	429	22881	429	21849	429	21066
430	23169	430	22795	430	22963	430	23241	430	22081	430	21413
431	23850	431	23320	431	23100	431	23559	431	22056	431	21998
432	23952	432	23345	432	23433	432	23841	432	22642	432	22236
433	24567	433	24176	433	24016	433	24033	433	22965	433	22398
434	24855	434	24485	434	24213	434	24340	434	23648	434	22870
435	24915	435	24585	435	24335	435	24851	435	23734	435	23120
436	25440	436	25162	436	24783	436	24891	436	23775	436	23254
437	25694	437	25260	437	25139	437	24990	437	24244	437	23704
438	25872	438	25619	438	25262	438	25524	438	24164	438	24063
439	26273	439	25674	439	25412	439	25668	439	24307	439	24023
440	26125	440	25902	440	25865	440	25639	440	24712	440	24129
441	26079	441	25848	441	25835	441	26034	441	24837	441	24516
442	26549	442	26455	442	26109	442	26275	442	24948	442	24206
443	26703	443	26418	443	25873	443	26356	443	24646	443	24458
444	26558	444	26206	444	26162	444	26216	444	25066	444	24657
445	26858	445	26389	445	25859	445	26113	445	25204	445	24776
446	26875	446	26532	446	26094	446	26333	446	25316	446	24763
447	26711	447	26316	447	26444	447	26121	447	25233	447	24598
448	26590	448	26566	448	26389	448	26196	448	24809	448	24517
449	26739	449	26386	449	26081	449	25972	449	24661	449	24509
450	26401	450	26163	450	25779	450	26270	450	24698	450	24304
451	26219	451	26230	451	25927	451	26137	451	24638	451	24463
452	26262	452	25797	452	25580	452	25334	452	24406	452	24103
453	26397	453	25811	453	25450	453	25363	453	24233	453	23915
454	26149	454	25620	454	25349	454	25257	454	24193	454	23673
455	25764	455	25537	455	25068	455	25277	455	24056	455	23718
456	25838	456	25210	456	24710	456	25073	456	23815	456	23447
457	25379	457	24897	457	24564	457	24561	457	24000	457	23299
458	24950	458	24771	458	24394	458	24459	458	23406	458	22837
459	25001	459	24560	459	24258	459	23914	459	23070	459	22784
460	24657	460	24323	460	23638	460	23828	460	22635	460	22408
461	24248	461	23940	461	23613	461	23358	461	22629	461	22107
462	23932	462	23504	462	23296	462	23037	462	22108	462	21786
463	23429	463	23303	463	22991	463	22860	463	21655	463	21662
464	23325	464	22839	464	22426	464	22693	464	21731	464	21247
465	22518	465	22615	465	22407	465	22048	465	21103	465	20982
466	22507	466	22601	466	21952	466	22011	466	20931	466	20495
467	22214	467	22077	467	21762	467	21527	467	20703	467	20632
468	21866	468	21290	468	20758	468	21037	468	20096	468	20146
469	21213	469	20951	469	20778	469	20343	469	19846	469	19650
470	20854	470	20590	470	20236	470	20172	470	19203	470	19189
471	20616	471	20320	471	19706	471	19806	471	19012	471	19033
472	20075	472	20033	472	19492	472	19761	472	18672	472	18431
473	20092	473	19213	473	19468	473	18902	473	18286	473	18186
474	19505	474	19096	474	18698	474	18785	474	18014	474	17697
475	19016	475	18953	475	18327	475	18298	475	17529	475	17488
476	18505	476	18510	476	18177	476	18109	476	17297	476	17019
477	18103	477	17763	477	17730	477	17496	477	16794	477	16619
478	17706	478	17388	478	17561	478	17306	478	16377	478	16465
479	17434	479	17431	479	17076	479	16911	479	16106	479	15888
480	17274	480	16869	480	16686	480	16808	480	16013	480	15752
481	16516	481	16681	481	16181	481	16010	481	15622	481	15419
482	16355	482	15914	482	15842	482	15812	482	15122	482	14876
483	15990	483	15794	483	15661	483	15188	483	14791	483	14837
484	15618	484	15360	484	15042	484	15080	484	14491	484	14288
485	15410	485	15068	485	14724	485	14605	485	13904	485	14030
486	14966	486	14833	486	14219	486	14138	486	13729	486	13486
487	14560	487	14523	487	14083	487	14113	487	13702	487	13198
488	14387	488	14084	488	13620	488	13633	488	13266	488	13285
489	13894	489	13733	489	13547	489	13418	489	12840	489	12661
490	13595	490	13235	490	12947	490	12954	490	12485	490	12210
491	13173	491	13227	491	12778	491	13004	491	12103	491	11972
492	13100	492	12528	492	12389	492	11968	492	11707	492	11844
493	12353	493	12240	493	12116	493	11906	493	11419	493	11555
494	11904	494	11870	494	11607	494	11584	494	11192	494	11073
495	11890	495	11631	495	11474	495	11363	495	10812	495	10877
496	11456	496	11306	496	11131	496	10825	496	10532	496	10602
497	11109	497	10936	497	10872	497	10579	497	10064	497	10220
498	10652	498	10821	498	10685	498	10443	498	9822	498	9877
499	10366	499	10308	499	10172	499	10062	499	9739	499	9558
500	10353	500	10073	500	9847	500	9756	500	9351	500	9275
501	9887	501	9743	501	9703	501	9445	501	9214	501	9262
502	9648	502	9418	502	9239	502	9214	502	8872	502	8736
503	9211	503	9385	503	9229	503	8839	503	8522	503	8546
504	9181	504	9042	504	8880	504	8654	504	8282	504	8406
505	8810	505	8842	505	8514	505	8359	505	8113	505	8147
506	8523	506	8482	506	8086	506	8247	506	7719	506	7968
507	8345	507	8184	507	7953	507	7916	507	7670	507	7523
508	7874	508	7922	508	7871	508	7647	508	7312	508	7265
509	7718	509	7616	509	7498	509	7301	509	7130	509	7179
510	7583	510	7414	510	7359	510	7240	510	6655	510	6964
511	7326	511	7154	511	7133	511	7085	511	6763	511	6513
512	7068	512	7050	512	6839	512	6701	512	6492	512	6450
513	6937	513	6787	513	6573	513	6395	513	6375	513	6297
514	6776	514	6573	514	6566	514	6311	514	6004	514	6084
515	6384	515	6246	515	6158	515	6235	515	6022	515	5835
516	6391	516	6230	516	6021	516	5955	516	5755	516	5810
517	6010	517	5998	517	5719	517	5699	517	5539	517	5443
518	5916	518	5812	518	5531	518	5529	518	5361	518	5467
519	5639	519	5581	519	5518	519	5436	519	5104	519	5311
520	5551	520	5500	520	5379	520	5157	520	5075	520	5003
521	5392	521	5246	521	5102	521	5094	521	4819	521	4973
522	5083	522	5140	522	4941	522	4809	522	4713	522	4686
523	5038	523	4946	523	4844	523	4745	523	4616	523	4542
524	4778	524	4717	524	4580	524	4546	524	4519	524	4449
525	4649	525	4660	525	4613	525	4398	525	4211	525	4252
526	4568	526	4495	526	4437	526	4128	526	4154	526	4027
527	4289	527	4184	527	4300	527	4188	527	4035	527	3979
528	4188	528	4228	528	4104	528	3998	528	3908	528	3827
529	4063	529	4018	529	3993	529	3860	529	3701	529	3697
530	3822	530	3927	530	3747	530	3790	530	3605	530	3641
531	3875	531	3649	531	3666	531	3613	531	3516	531	3400
532	3652	532	3671	532	3525	532	3641	532	3360	532	3292
533	3615	533	3563	533	3486	533	3394	533	3131	533	3194
534	3385	534	3445	534	3363	534	3373	534	3093	534	3163
535	3371	535	3357	535	3282	535	3215	535	3068	535	2993
536	3237	536	3162	536	3156	536	2918	536	3024	536	2950
537	3121	537	3079	537	2966	537	2941	537	2856	537	2790
538	2943	538	3006	538	2908	538	2796	538	2762	538	2632
539	2883	539	2879	539	2798	539	2699	539	2554	539	2669
540	2771	540	2678	540	2692	540	2636	540	2737	540	2553
541	2746	541	2812	541	2752	541	2576	541	2488	541	2464
542	2549	542	2564	542	2526	542	2384	542	2312	542	2427
543	2581	543	2457	543	2295	543	2374	543	2311	543	2263
544	2425	544	2419	544	2253	544	2288	544	2198	544	2245
545	2317	545	2322	545	2226	545	2176	545	2140	545	2103
546	2271	546	2260	546	2183	546	2020	546	2089	546	2025
547	2210	547	2150	547	2119	547	2078	547	2029	547	1959
548	2097	548	2109	548	1989	548	1942	548	1909	548	1982
549	1972	549	1998	549	1957	549	1958	549	1783	549	1872
550	1923	550	1992	550	1847	550	1807	550	1767	550	1813
551	1897	551	1904	551	1806	551	1818	551	1729	551	1756
552	1849	552	1811	552	1748	552	1809	552	1662	552	1691
553	1787	553	1717	553	1705	553	1621	553	1640	553	1655
554	1722	554	1688	554	1581	554	1578	554	1498	554	1574
555	1651	555	1671	555	1632	555	1512	555	1475	555	1516
556	1580	556	1635	556	1570	556	1499	556	1484	556	1423
557	1531	557	1511	557	1457	557	1524	557	1395	557	1324
558	1405	558	1433	558	1438	558	1478	558	1339	558	1351
559	1430	559	1420	559	1395	559	1353	559	1277	559	1285
560	1420	560	1401	560	1344	560	1359	560	1250	560	1257
561	1340	561	1317	561	1315	561	1304	561	1192	561	1226
562	1321	562	1251	562	1194	562	1259	562	1263	562	1207
563	1296	563	1222	563	1236	563	1207	563	1100	563	1095
564	1260	564	1253	564	1144	564	1151	564	1099	564	1106
565	1147	565	1173	565	1129	565	1083	565	1071	565	1128
566	1132	566	1072	566	1116	566	1085	566	991	566	1023
567	1153	567	1111	567	1015	567	1026	567	968	567	1013
568	1068	568	1075	568	1067	568	1008	568	983	568	978
569	1045	569	1101	569	1022	569	938	569	942	569	974
570	1000	570	998	570	958	570	947	570	919	570	947
571	988	571	1051	571	923	571	890	571	883	571	827
572	970	572	908	572	902	572	864	572	872	572	852
573	866	573	931	573	891	573	873	573	799	573	831
574	889	574	879	574	831	574	833	574	813	574	860
575	823	575	818	575	886	575	886	575	813	575	783
576	817	576	836	576	798	576	734	576	731	576	769
577	837	577	764	577	776	577	682	577	737	577	746
578	749	578	723	578	723	578	776	578	708	578	705
579	762	579	751	579	765	579	683	579	655	579	660
580	719	580	744	580	685	580	694	580	641	580	666
581	741	581	712	581	705	581	720	581	682	581	627
582	672	582	715	582	679	582	683	582	575	582	617
583	679	583	743	583	673	583	688	583	664	583	616
584	632	584	647	584	637	584	593	584	587	584	583
585	624	585	614	585	632	585	579	585	548	585	600
586	609	586	592	586	594	586	548	586	514	586	568
587	567	587	563	587	562	587	569	587	529	587	520
588	556	588	591	588	513	588	560	588	495	588	556
589	545	589	551	589	578	589	499	589	493	589	482
590	565	590	535	590	548	590	511	590	497	590	462
591	485	591	524	591	495	591	466	591	472	591	492
592	523	592	549	592	518	592	452	592	442	592	454
593	484	593	498	593	489	593	447	593	471	593	435
594	465	594	474	594	438	594	448	594	425	594	462
595	425	595	452	595	453	595	453	595	432	595	388
596	452	596	436	596	448	596	406	596	409	596	431
597	468	597	405	597	429	597	408	597	392	597	390
598	437	598	406	598	423	598	397	598	413	598	392
599	393	599	419	599	410	599	382	599	382	599	374
600	409	600	396	600	382	600	376	600	372	600	363
601	399	601	367	601	404	601	348	601	345	601	363
602	408	602	354	602	365	602	405	602	361	602	369
603	368	603	365	603	361	603	377	603	336	603	296
604	370	604	351	604	350	604	294	604	332	604	311
605	341	605	333	605	360	605	307	605	318	605	317
606	341	606	329	606	308	606	295	606	341	606	315
607	325	607	293	607	293	607	312	607	297	607	283
608	288	608	315	608	315	608	286	608	277	608	298
609	273	609	301	609	284	609	297	609	266	609	273
610	297	610	301	610	270	610	305	610	264	610	291
611	262	611	308	611	262	611	265	611	286	611	271
612	298	612	292	612	269	612	263	612	246	612	250
613	228	613	271	613	237	613	273	613	246	613	248
614	288	614	274	614	255	614	248	614	235	614	221
615	229	615	289	615	223	615	215	615	220	615	231
616	239	616	279	616	242	616	225	616	214	616	199
617	250	617	243	617	232	617	233	617	224	617	250
618	264	618	213	618	187	618	218	618	207	618	218
619	229	619	239	619	214	619	203	619	201	619	219
620	201	620	221	620	219	620	224	620	210	620	209
621	204	621	227	621	186	621	194	621	208	621	200
622	203	622	175	622	170	622	206	622	210	622	185
623	195	623	202	623	163	623	209	623	169	623	180
624	206	624	192	624	191	624	182	624	158	624	222
625	202	625	204	625	181	625	161	625	186	625	161
626	170	626	183	626	173	626	173	626	167	626	165
627	191	627	161	627	186	627	177	627	157	627	168
628	176	628	164	628	159	628	188	628	162	628	161
629	180	629	169	629	177	629	159	629	177	629	171
630	198	630	155	630	156	630	163	630	147	630	150
631	173	631	147	631	144	631	147	631	160	631	186
632	165	632	174	632	167	632	150	632	123	632	159
633	156	633	157	633	167	633	137	633	148	633	157
634	147	634	155	634	148	634	151	634	144	634	156
635	161	635	140	635	147	635	149	635	137	635	137
636	140	636	149	636	155	636	115	636	129	636	137
637	119	637	144	637	138	637	145	637	137	637	147
638	130	638	130	638	129	638	119	638	121	638	147
639	134	639	139	639	123	639	140	639	123	639	134
640	130	640	128	640	136	640	134	640	127	640	133
641	103	641	183	641	115	641	109	641	129	641	118
642	126	642	127	642	118	642	125	642	123	642	119
643	108	643	149	643	118	643	109	643	106	643	113
644	105	644	124	644	112	644	98	644	112	644	108
645	113	645	98	645	117	645	114	645	109	645	109
646	117	646	95	646	102	646	110	646	122	646	127
647	138	647	112	647	119	647	102	647	123	647	102
648	116	648	123	648	101	648	126	648	104	648	97
649	125	649	94	649	112	649	130	649	97	649	114
650	89	650	109	650	116	650	105	650	95	650	109
651	104	651	104	651	109	651	104	651	99	651	103
652	102	652	103	652	116	652	90	652	95	652	99
653	83	653	87	653	86	653	102	653	111	653	93
654	100	654	111	654	101	654	80	654	72	654	90
655	87	655	102	655	94	655	82	655	99	655	79
656	83	656	100	656	80	656	83	656	75	656	78
657	78	657	103	657	95	657	72	657	100	657	92
658	84	658	94	658	83	658	90	658	73	658	85
659	104	659	105	659	82	659	87	659	73	659	89
660	83	660	78	660	88	660	93	660	100	660	87
661	80	661	74	661	69	661	67	661	69	661	94
662	80	662	78	662	81	662	77	662	52	662	83
663	97	663	89	663	75	663	93	663	76	663	71
664	80	664	85	664	81	664	70	664	87	664	62
665	75	665	87	665	93	665	93	665	83	665	86
666	71	666	73	666	76	666	84	666	68	666	70
667	73	667	66	667	77	667	89	667	88	667	72
668	68	668	68	668	70	668	69	668	66	668	74
669	78	669	78	669	69	669	72	669	64	669	71
670	65	670	79	670	74	670	67	670	70	670	76
671	75	671	81	671	65	671	69	671	74	671	68
672	73	672	63	672	59	672	56	672	79	672	64
673	78	673	86	673	50	673	74	673	66	673	69
674	70	674	52	674	63	674	73	674	80	674	58
675	73	675	71	675	58	675	76	675	68	675	54
676	64	676	82	676	78	676	57	676	76	676	71
677	63	677	55	677	63	677	73	677	70	677	57
678	71	678	54	678	70	678	64	678	62	678	53
679	65	679	74	679	63	679	50	679	69	679	63
680	56	680	79	680	66	680	64	680	67	680	65

## Sheet: Figure S16(c)
365	59	365	92	365	66	365	60	365	36	365	50
366	58	366	72	366	75	366	61	366	39	366	53
367	60	367	75	367	71	367	54	367	47	367	61
368	79	368	80	368	79	368	66	368	63	368	48
369	67	369	62	369	87	369	77	369	52	369	62
370	99	370	92	370	91	370	70	370	54	370	72
371	69	371	92	371	97	371	92	371	68	371	49
372	123	372	112	372	105	372	75	372	60	372	47
373	106	373	114	373	143	373	105	373	59	373	55
374	98	374	130	374	156	374	126	374	79	374	82
375	139	375	140	375	182	375	133	375	93	375	76
376	182	376	167	376	199	376	140	376	73	376	87
377	196	377	189	377	221	377	177	377	81	377	105
378	209	378	241	378	226	378	202	378	104	378	117
379	302	379	279	379	305	379	232	379	127	379	145
380	299	380	313	380	383	380	260	380	134	380	149
381	356	381	399	381	432	381	315	381	165	381	217
382	449	382	478	382	507	382	387	382	227	382	234
383	528	383	605	383	610	383	459	383	249	383	241
384	645	384	671	384	750	384	603	384	308	384	309
385	759	385	865	385	875	385	713	385	351	385	376
386	983	386	1007	386	1010	386	782	386	438	386	435
387	1146	387	1253	387	1153	387	968	387	537	387	521
388	1311	388	1411	388	1387	388	1147	388	649	388	641
389	1529	389	1674	389	1606	389	1365	389	746	389	746
390	1847	390	1865	390	2001	390	1561	390	902	390	807
391	2239	391	2249	391	2261	391	1840	391	1150	391	1020
392	2490	392	2596	392	2576	392	2197	392	1288	392	1144
393	2986	393	3050	393	3077	393	2567	393	1614	393	1408
394	3472	394	3511	394	3468	394	2924	394	1868	394	1548
395	4050	395	3978	395	4047	395	3385	395	2063	395	1868
396	4641	396	4586	396	4589	396	3849	396	2521	396	2200
397	5322	397	5163	397	5124	397	4368	397	2918	397	2412
398	5940	398	5909	398	5840	398	4906	398	3317	398	2778
399	6943	399	6695	399	6635	399	5555	399	4009	399	3167
400	7515	400	7504	400	7410	400	6240	400	4330	400	3543
401	8348	401	8614	401	8047	401	6801	401	5040	401	3899
402	9533	402	9293	402	9018	402	7670	402	5590	402	4451
403	10295	403	10320	403	9908	403	8547	403	6042	403	4934
404	11337	404	11124	404	10740	404	9313	404	6876	404	5358
405	12541	405	12176	405	11699	405	10191	405	7648	405	5902
406	13200	406	13030	406	12716	406	10665	406	8291	406	6364
407	14343	407	14092	407	13765	407	11637	407	8966	407	6996
408	15351	408	14991	408	14432	408	12464	408	9809	408	7355
409	16256	409	16298	409	15596	409	13258	409	10469	409	7984
410	17559	410	17056	410	16269	410	14073	410	10942	410	8292
411	18623	411	17856	411	17592	411	15203	411	11999	411	9090
412	19464	412	19134	412	18428	412	15659	412	12714	412	9616
413	20544	413	20574	413	19440	413	16580	413	13433	413	9967
414	21776	414	20956	414	20146	414	17484	414	14407	414	10745
415	22933	415	22498	415	21262	415	18243	415	14799	415	10923
416	24027	416	23430	416	22307	416	19025	416	15375	416	11776
417	24653	417	24369	417	23014	417	19930	417	16289	417	12179
418	25578	418	25063	418	23632	418	20543	418	16613	418	12467
419	26812	419	25874	419	24829	419	21294	419	17432	419	13048
420	27835	420	27149	420	25298	420	21927	420	18004	420	13332
421	28647	421	27623	421	26391	421	23137	421	18634	421	13979
422	29485	422	28525	422	27246	422	23857	422	19340	422	14519
423	29814	423	29316	423	27819	423	23938	423	19812	423	14848
424	31109	424	29917	424	28520	424	24687	424	20365	424	15270
425	31708	425	30863	425	29214	425	25250	425	21151	425	15693
426	32403	426	31576	426	29952	426	25623	426	21775	426	15912
427	32878	427	32267	427	30713	427	26947	427	22267	427	16253
428	33630	428	32798	428	30902	428	26890	428	22449	428	16634
429	34157	429	33458	429	31252	429	27531	429	23129	429	16971
430	34721	430	33816	430	32263	430	28010	430	23539	430	17438
431	35431	431	34584	431	32692	431	28639	431	23789	431	17649
432	35951	432	34838	432	33002	432	28743	432	23879	432	17771
433	36274	433	35567	433	33638	433	29041	433	24627	433	18032
434	36610	434	35902	434	33688	434	29743	434	24725	434	18397
435	37241	435	36209	435	34043	435	29705	435	24920	435	18584
436	37659	436	36248	436	34511	436	30344	436	25298	436	18812
437	37901	437	37157	437	35115	437	30502	437	25565	437	19005
438	38220	438	36801	438	35007	438	30537	438	26003	438	19208
439	38288	439	37157	439	35043	439	30674	439	26292	439	19182
440	38689	440	37803	440	35597	440	30661	440	26146	440	19332
441	38932	441	37852	441	35798	441	30971	441	26406	441	19392
442	39221	442	38084	442	36122	442	31153	442	26714	442	19338
443	38994	443	37686	443	35786	443	31161	443	27023	443	19886
444	39072	444	37997	444	35788	444	31261	444	27127	444	19723
445	39114	445	38059	445	35770	445	31239	445	26924	445	19842
446	39533	446	37889	446	35967	446	31257	446	27059	446	19735
447	39374	447	38269	447	35875	447	31039	447	26923	447	19729
448	39138	448	37970	448	35994	448	31177	448	26886	448	19737
449	38883	449	38042	449	35688	449	31266	449	26635	449	19374
450	39016	450	37797	450	35356	450	30510	450	27043	450	19500
451	38765	451	37725	451	34888	451	30989	451	26157	451	19171
452	38828	452	37408	452	34786	452	30253	452	26572	452	19280
453	38047	453	37198	453	34797	453	30233	453	26152	453	19274
454	37702	454	37077	454	34571	454	30052	454	26354	454	19143
455	37451	455	36220	455	33890	455	29692	455	25778	455	18497
456	37218	456	35895	456	33356	456	29515	456	25560	456	18404
457	36763	457	35442	457	33356	457	29155	457	25528	457	18422
458	36074	458	35128	458	33084	458	28528	458	25135	458	18312
459	35822	459	34574	459	32425	459	28225	459	24948	459	17890
460	35804	460	34529	460	32484	460	27780	460	24892	460	17499
461	34889	461	33917	461	31688	461	27656	461	24504	461	17649
462	34593	462	33217	462	31090	462	27291	462	23890	462	17464
463	33921	463	32882	463	30548	463	27006	463	23559	463	17012
464	33704	464	32262	464	30370	464	26662	464	23257	464	16707
465	33041	465	31826	465	29653	465	26068	465	22825	465	16375
466	32426	466	31479	466	29499	466	25516	466	22714	466	16184
467	32128	467	31021	467	28939	467	25132	467	22343	467	16042
468	31057	468	30323	468	28244	468	24786	468	21934	468	15833
469	30719	469	29781	469	27963	469	24221	469	21323	469	15504
470	29932	470	29042	470	27051	470	23588	470	21281	470	15229
471	29591	471	28493	471	26775	471	23170	471	20597	471	14828
472	28973	472	28131	472	26052	472	22451	472	20134	472	14402
473	28185	473	27212	473	25530	473	22449	473	19903	473	14101
474	27618	474	26934	474	24996	474	21657	474	19568	474	13960
475	27035	475	26221	475	24256	475	21426	475	19417	475	13460
476	26692	476	26055	476	24033	476	20719	476	18899	476	13271
477	26045	477	25211	477	23373	477	20393	477	18055	477	13065
478	25545	478	24944	478	22963	478	19797	478	17793	478	12535
479	25100	479	24085	479	22647	479	19511	479	17367	479	12404
480	24327	480	23788	480	22341	480	18755	480	17387	480	12275
481	23882	481	23033	481	21237	481	18473	481	17002	481	12152
482	23491	482	22631	482	20926	482	18341	482	16435	482	11693
483	22844	483	22105	483	20480	483	17574	483	16258	483	11346
484	22560	484	21467	484	19927	484	17333	484	15893	484	11042
485	21427	485	20992	485	19720	485	16962	485	15581	485	10844
486	21334	486	20694	486	18965	486	16697	486	14829	486	10661
487	21017	487	20046	487	18513	487	16095	487	14606	487	10478
488	20096	488	19384	488	17952	488	15581	488	14283	488	10104
489	19667	489	19010	489	17848	489	15543	489	13944	489	9724
490	19275	490	18639	490	17311	490	14921	490	13576	490	9441
491	18646	491	18237	491	16814	491	14464	491	13332	491	9274
492	18022	492	17601	492	16311	492	14026	492	13083	492	9064
493	17791	493	16957	493	15890	493	13778	493	12484	493	8890
494	17101	494	16634	494	15449	494	13393	494	12179	494	8726
495	16676	495	15884	495	15172	495	13042	495	11926	495	8384
496	16206	496	15676	496	14520	496	12578	496	11368	496	8116
497	15772	497	15320	497	14475	497	12429	497	11185	497	7848
498	15418	498	14816	498	13799	498	12233	498	10822	498	7675
499	14909	499	14315	499	13435	499	11719	499	10854	499	7680
500	14632	500	13895	500	13287	500	11174	500	10298	500	7124
501	14092	501	13456	501	12554	501	10991	501	9929	501	6902
502	13489	502	13219	502	12205	502	10312	502	9622	502	6875
503	13164	503	12839	503	11850	503	10268	503	9448	503	6611
504	12828	504	12266	504	11514	504	9953	504	9193	504	6242
505	12552	505	12214	505	11095	505	9577	505	8874	505	6196
506	11879	506	11640	506	10824	506	9285	506	8820	506	5951
507	11734	507	11410	507	10562	507	9142	507	8306	507	5763
508	11344	508	10925	508	10213	508	8781	508	8185	508	5705
509	10979	509	10411	509	9752	509	8536	509	7830	509	5596
510	10511	510	10507	510	9516	510	8182	510	7597	510	5389
511	10221	511	9988	511	9389	511	7938	511	7374	511	5079
512	9908	512	9748	512	8981	512	7762	512	6980	512	4979
513	9577	513	9244	513	8768	513	7342	513	6933	513	4831
514	9452	514	9197	514	8558	514	7090	514	6716	514	4573
515	8940	515	8659	515	8181	515	7112	515	6350	515	4439
516	8725	516	8508	516	7888	516	6756	516	6316	516	4433
517	8414	517	8384	517	7732	517	6583	517	6109	517	4291
518	8235	518	8100	518	7324	518	6465	518	6007	518	4027
519	8023	519	7711	519	7170	519	6232	519	5737	519	3950
520	7616	520	7413	520	6928	520	5946	520	5508	520	3855
521	7466	521	7217	521	6748	521	5702	521	5223	521	3711
522	7177	522	6947	522	6521	522	5499	522	5236	522	3554
523	6928	523	6803	523	6347	523	5421	523	5068	523	3587
524	6610	524	6490	524	6183	524	5169	524	4822	524	3437
525	6502	525	6214	525	5789	525	4883	525	4697	525	3302
526	6222	526	6054	526	5583	526	4921	526	4705	526	3100
527	6056	527	5810	527	5465	527	4649	527	4418	527	3132
528	5810	528	5759	528	5241	528	4579	528	4277	528	2886
529	5602	529	5590	529	5098	529	4373	529	4048	529	2806
530	5451	530	5305	530	4878	530	4181	530	3900	530	2757
531	5338	531	5107	531	4852	531	4111	531	3711	531	2641
532	5111	532	5024	532	4457	532	3954	532	3640	532	2605
533	4952	533	4812	533	4395	533	3724	533	3517	533	2457
534	4736	534	4555	534	4292	534	3645	534	3519	534	2418
535	4615	535	4491	535	4234	535	3472	535	3376	535	2270
536	4514	536	4238	536	4063	536	3436	536	3233	536	2227
537	4346	537	4183	537	3850	537	3344	537	3073	537	2189
538	4170	538	4067	538	3735	538	3212	538	3029	538	2006
539	4000	539	3990	539	3627	539	3007	539	2804	539	1935
540	3839	540	3776	540	3493	540	3124	540	2794	540	1898
541	3606	541	3654	541	3325	541	2784	541	2737	541	1829
542	3719	542	3461	542	3262	542	2662	542	2588	542	1751
543	3368	543	3368	543	3121	543	2618	543	2543	543	1689
544	3225	544	3158	544	2918	544	2565	544	2437	544	1689
545	3253	545	3021	545	2886	545	2472	545	2400	545	1606
546	3113	546	3063	546	2821	546	2439	546	2380	546	1558
547	3026	547	2878	547	2651	547	2287	547	2079	547	1475
548	2899	548	2730	548	2572	548	2221	548	2128	548	1457
549	2853	549	2812	549	2527	549	2105	549	2113	549	1375
550	2688	550	2647	550	2401	550	2134	550	1958	550	1414
551	2544	551	2491	551	2332	551	1972	551	1837	551	1309
552	2538	552	2494	552	2170	552	2008	552	1812	552	1275
553	2387	553	2279	553	2197	553	1858	553	1743	553	1229
554	2249	554	2239	554	2194	554	1840	554	1649	554	1195
555	2343	555	2190	555	2018	555	1779	555	1686	555	1165
556	2082	556	2070	556	1978	556	1740	556	1566	556	1180
557	2144	557	1990	557	1926	557	1617	557	1559	557	1027
558	2027	558	2021	558	1813	558	1534	558	1470	558	1016
559	2009	559	1890	559	1692	559	1533	559	1421	559	988
560	1856	560	1845	560	1725	560	1477	560	1438	560	1008
561	1849	561	1704	561	1736	561	1418	561	1354	561	877
562	1749	562	1693	562	1633	562	1409	562	1267	562	862
563	1722	563	1634	563	1552	563	1247	563	1257	563	857
564	1585	564	1548	564	1488	564	1249	564	1165	564	833
565	1607	565	1571	565	1392	565	1290	565	1209	565	826
566	1466	566	1531	566	1435	566	1263	566	1140	566	769
567	1504	567	1403	567	1376	567	1165	567	1093	567	758
568	1477	568	1409	568	1283	568	1157	568	1037	568	675
569	1436	569	1397	569	1219	569	1082	569	1067	569	727
570	1314	570	1321	570	1226	570	1012	570	1030	570	676
571	1259	571	1246	571	1153	571	1017	571	979	571	678
572	1240	572	1243	572	1209	572	981	572	969	572	668
573	1241	573	1196	573	1079	573	909	573	868	573	638
574	1204	574	1146	574	1075	574	974	574	888	574	577
575	1112	575	1138	575	985	575	890	575	848	575	571
576	1131	576	1067	576	1007	576	869	576	798	576	566
577	1087	577	1008	577	966	577	866	577	749	577	534
578	1009	578	994	578	946	578	758	578	800	578	536
579	955	579	927	579	931	579	823	579	716	579	518
580	1018	580	933	580	891	580	799	580	760	580	476
581	931	581	940	581	828	581	734	581	726	581	514
582	912	582	928	582	834	582	712	582	656	582	492
583	914	583	859	583	815	583	744	583	667	583	441
584	836	584	863	584	755	584	700	584	634	584	451
585	820	585	849	585	742	585	652	585	645	585	400
586	851	586	778	586	734	586	581	586	604	586	413
587	776	587	786	587	733	587	589	587	598	587	412
588	712	588	696	588	730	588	581	588	549	588	382
589	710	589	682	589	677	589	600	589	535	589	361
590	734	590	672	590	644	590	563	590	526	590	389
591	657	591	672	591	626	591	551	591	515	591	347
592	643	592	668	592	629	592	535	592	480	592	359
593	615	593	626	593	573	593	498	593	480	593	353
594	646	594	619	594	551	594	495	594	488	594	352
595	597	595	595	595	560	595	491	595	503	595	321
596	568	596	573	596	547	596	457	596	430	596	302
597	581	597	540	597	504	597	438	597	446	597	264
598	542	598	544	598	502	598	446	598	420	598	289
599	573	599	542	599	519	599	421	599	391	599	284
600	544	600	480	600	496	600	379	600	367	600	270
601	498	601	475	601	460	601	390	601	380	601	239
602	482	602	501	602	426	602	382	602	374	602	260
603	480	603	489	603	441	603	342	603	342	603	266
604	460	604	409	604	431	604	356	604	357	604	240
605	461	605	409	605	413	605	323	605	300	605	250
606	420	606	444	606	402	606	308	606	331	606	233
607	381	607	400	607	423	607	377	607	323	607	231
608	418	608	404	608	366	608	329	608	288	608	227
609	433	609	378	609	376	609	297	609	311	609	243
610	354	610	383	610	368	610	254	610	277	610	202
611	355	611	357	611	355	611	270	611	291	611	199
612	375	612	366	612	337	612	277	612	268	612	174
613	308	613	312	613	376	613	280	613	272	613	180
614	374	614	350	614	313	614	281	614	255	614	166
615	369	615	337	615	282	615	277	615	247	615	189
616	308	616	311	616	327	616	238	616	244	616	184
617	274	617	283	617	275	617	258	617	253	617	177
618	289	618	311	618	261	618	228	618	217	618	144
619	311	619	266	619	255	619	234	619	207	619	157
620	297	620	280	620	236	620	244	620	230	620	167
621	233	621	260	621	262	621	216	621	223	621	165
622	258	622	245	622	313	622	211	622	186	622	150
623	260	623	242	623	240	623	200	623	190	623	150
624	246	624	259	624	218	624	204	624	170	624	129
625	253	625	240	625	224	625	203	625	206	625	137
626	254	626	259	626	195	626	172	626	183	626	107
627	214	627	237	627	226	627	160	627	195	627	140
628	223	628	223	628	209	628	195	628	180	628	142
629	198	629	192	629	189	629	154	629	183	629	125
630	221	630	201	630	205	630	142	630	143	630	122
631	240	631	203	631	185	631	161	631	158	631	100
632	228	632	184	632	185	632	149	632	159	632	106
633	195	633	209	633	193	633	152	633	159	633	99
634	186	634	192	634	171	634	153	634	142	634	105
635	201	635	172	635	169	635	147	635	123	635	106
636	183	636	193	636	157	636	154	636	130	636	101
637	166	637	136	637	158	637	117	637	137	637	101
638	188	638	142	638	180	638	145	638	143	638	114
639	174	639	167	639	162	639	115	639	117	639	102
640	140	640	163	640	150	640	119	640	130	640	110
641	156	641	155	641	166	641	115	641	117	641	106
642	154	642	155	642	127	642	120	642	116	642	105
643	148	643	157	643	153	643	122	643	119	643	86
644	151	644	164	644	136	644	102	644	134	644	79
645	159	645	139	645	135	645	105	645	134	645	88
646	126	646	147	646	151	646	126	646	130	646	98
647	148	647	155	647	146	647	104	647	89	647	84
648	154	648	146	648	133	648	95	648	118	648	83
649	126	649	144	649	150	649	127	649	105	649	95
650	130	650	135	650	127	650	94	650	113	650	99
651	130	651	140	651	106	651	85	651	109	651	93
652	116	652	126	652	132	652	128	652	99	652	75
653	139	653	132	653	107	653	96	653	108	653	69
654	128	654	131	654	128	654	102	654	87	654	74
655	125	655	106	655	118	655	99	655	94	655	99
656	130	656	113	656	121	656	88	656	84	656	67
657	107	657	112	657	107	657	71	657	97	657	83
658	114	658	138	658	108	658	92	658	106	658	68
659	110	659	127	659	104	659	80	659	109	659	72
660	120	660	104	660	111	660	76	660	107	660	74
661	97	661	124	661	108	661	81	661	88	661	71
662	110	662	96	662	108	662	74	662	82	662	77
663	107	663	107	663	108	663	66	663	91	663	65
664	99	664	115	664	96	664	67	664	86	664	70
665	93	665	107	665	94	665	74	665	71	665	57
666	101	666	101	666	90	666	74	666	77	666	69
667	104	667	110	667	87	667	63	667	80	667	80
668	92	668	113	668	94	668	51	668	68	668	67
669	94	669	89	669	80	669	39	669	79	669	67
670	79	670	79	670	84	670	73	670	75	670	51
671	91	671	80	671	75	671	68	671	69	671	57
672	97	672	81	672	89	672	52	672	85	672	61
673	77	673	82	673	89	673	66	673	64	673	67
674	90	674	86	674	82	674	62	674	57	674	63
675	81	675	65	675	75	675	74	675	65	675	57
676	88	676	64	676	72	676	61	676	71	676	51
677	76	677	80	677	66	677	53	677	53	677	69
678	86	678	69	678	71	678	60	678	56	678	64
679	62	679	85	679	79	679	46	679	66	679	54
680	79	680	88	680	91	680	62	680	59	680	52

## Sheet: Figure S16 (d)
365	50	365	48	365	58	365	65	365	71	365	49
366	53	366	43	366	41	366	69	366	53	366	48
367	61	367	52	367	39	367	51	367	64	367	44
368	48	368	57	368	52	368	44	368	58	368	64
369	62	369	56	369	59	369	59	369	42	369	61
370	72	370	54	370	57	370	55	370	62	370	60
371	49	371	66	371	61	371	61	371	54	371	63
372	47	372	62	372	63	372	70	372	67	372	64
373	55	373	63	373	67	373	70	373	70	373	68
374	82	374	80	374	77	374	78	374	76	374	78
375	76	375	71	375	68	375	83	375	96	375	84
376	87	376	94	376	73	376	93	376	99	376	97
377	105	377	123	377	126	377	148	377	88	377	101
378	117	378	110	378	134	378	120	378	127	378	131
379	145	379	131	379	126	379	142	379	125	379	150
380	149	380	158	380	152	380	168	380	161	380	153
381	217	381	195	381	212	381	198	381	183	381	178
382	234	382	216	382	232	382	206	382	217	382	212
383	241	383	267	383	277	383	257	383	263	383	273
384	309	384	302	384	292	384	300	384	320	384	289
385	376	385	359	385	335	385	323	385	358	385	361
386	435	386	416	386	431	386	451	386	411	386	390
387	521	387	503	387	509	387	517	387	511	387	499
388	641	388	586	388	604	388	639	388	554	388	564
389	746	389	708	389	792	389	707	389	690	389	668
390	807	390	820	390	822	390	865	390	815	390	814
391	1020	391	1030	391	1018	391	1003	391	981	391	937
392	1144	392	1110	392	1115	392	1205	392	1092	392	1108
393	1408	393	1301	393	1392	393	1294	393	1318	393	1314
394	1548	394	1659	394	1676	394	1599	394	1536	394	1560
395	1868	395	1839	395	1761	395	1878	395	1785	395	1905
396	2200	396	2117	396	2083	396	2137	396	2001	396	2012
397	2412	397	2390	397	2374	397	2354	397	2294	397	2332
398	2778	398	2676	398	2732	398	2721	398	2743	398	2731
399	3167	399	3122	399	3059	399	3069	399	3007	399	3028
400	3543	400	3491	400	3428	400	3401	400	3374	400	3416
401	3899	401	3713	401	3826	401	3903	401	3691	401	3737
402	4451	402	4283	402	4276	402	4281	402	4193	402	4191
403	4934	403	4717	403	4801	403	4659	403	4687	403	4548
404	5358	404	5110	404	5354	404	5267	404	4946	404	5020
405	5902	405	5707	405	5684	405	5733	405	5467	405	5516
406	6364	406	6189	406	6239	406	6080	406	5991	406	5988
407	6996	407	6639	407	6824	407	6591	407	6514	407	6714
408	7355	408	7121	408	7198	408	7302	408	7181	408	6978
409	7984	409	7624	409	7828	409	7761	409	7629	409	7587
410	8292	410	8256	410	8136	410	8274	410	7935	410	8092
411	9090	411	8662	411	8678	411	8693	411	8585	411	8542
412	9616	412	9311	412	9172	412	9265	412	9152	412	9093
413	9967	413	9647	413	9769	413	9741	413	9641	413	9645
414	10745	414	10247	414	10246	414	10353	414	10088	414	10146
415	10923	415	10755	415	10874	415	10562	415	10537	415	10677
416	11776	416	11282	416	11517	416	11375	416	11175	416	11136
417	12179	417	11634	417	11800	417	11751	417	11673	417	11395
418	12467	418	12182	418	12319	418	12199	418	11880	418	11847
419	13048	419	12325	419	12598	419	12601	419	12289	419	12294
420	13332	420	13025	420	13193	420	12957	420	12863	420	12674
421	13979	421	13384	421	13635	421	13461	421	13257	421	13308
422	14519	422	13929	422	14240	422	13885	422	13564	422	13837
423	14848	423	14089	423	14432	423	14375	423	14109	423	14162
424	15270	424	14988	424	14931	424	14698	424	14470	424	14569
425	15693	425	14982	425	15288	425	14904	425	14889	425	15061
426	15912	426	15290	426	15508	426	15418	426	15197	426	15187
427	16253	427	15853	427	15673	427	16045	427	15613	427	15464
428	16634	428	15949	428	16247	428	16252	428	15769	428	15676
429	16971	429	16384	429	16493	429	16434	429	16262	429	16336
430	17438	430	16486	430	16855	430	16646	430	16448	430	16252
431	17649	431	16697	431	17182	431	16897	431	16653	431	16604
432	17771	432	17024	432	17271	432	17295	432	16790	432	16756
433	18032	433	17321	433	17468	433	17384	433	17088	433	17129
434	18397	434	17776	434	17513	434	17658	434	17555	434	17243
435	18584	435	17588	435	18122	435	17925	435	17195	435	17394
436	18812	436	18006	436	18054	436	17977	436	17712	436	17689
437	19005	437	18255	437	18513	437	18079	437	17587	437	17998
438	19208	438	18195	438	18537	438	18516	438	17825	438	17928
439	19182	439	18408	439	18456	439	18518	439	18061	439	18167
440	19332	440	18680	440	18436	440	18334	440	18253	440	18449
441	19392	441	18487	441	18866	441	18911	441	18322	441	18191
442	19338	442	18796	442	18835	442	18755	442	18335	442	18420
443	19886	443	18725	443	19165	443	19112	443	18228	443	18448
444	19723	444	18806	444	18849	444	18884	444	18343	444	18316
445	19842	445	18974	445	18951	445	18639	445	18201	445	18254
446	19735	446	18666	446	18918	446	18778	446	18522	446	18567
447	19729	447	18505	447	19142	447	18893	447	18507	447	18440
448	19737	448	18639	448	18875	448	18692	448	18195	448	18680
449	19374	449	18604	449	18461	449	18656	449	18474	449	18551
450	19500	450	18498	450	18966	450	18584	450	18147	450	18410
451	19171	451	18616	451	18708	451	18481	451	17956	451	18163
452	19280	452	18356	452	18466	452	18390	452	17973	452	18166
453	19274	453	18158	453	18575	453	18447	453	17911	453	18124
454	19143	454	17911	454	18200	454	18063	454	17562	454	18156
455	18497	455	17980	455	17958	455	17771	455	17781	455	17483
456	18404	456	17741	456	18017	456	17772	456	17324	456	17790
457	18422	457	17764	457	17758	457	17666	457	17349	457	17145
458	18312	458	17473	458	17579	458	17098	458	17193	458	17310
459	17890	459	17184	459	17206	459	17313	459	16864	459	17021
460	17499	460	17004	460	17221	460	17158	460	16624	460	16704
461	17649	461	16744	461	17025	461	16754	461	16451	461	16752
462	17464	462	16370	462	16805	462	16695	462	16212	462	16617
463	17012	463	16414	463	16424	463	16302	463	16172	463	16054
464	16707	464	16073	464	16215	464	15991	464	15726	464	15805
465	16375	465	15552	465	15911	465	15982	465	15505	465	15603
466	16184	466	15532	466	15671	466	15658	466	15205	466	15535
467	16042	467	15091	467	15454	467	15261	467	14794	467	14832
468	15833	468	14879	468	15189	468	15147	468	14942	468	14975
469	15504	469	14676	469	14785	469	14624	469	14677	469	14512
470	15229	470	14418	470	14379	470	14425	470	14294	470	14204
471	14828	471	14071	471	14096	471	14159	471	13642	471	13710
472	14402	472	13870	472	13872	472	13800	472	13537	472	13612
473	14101	473	13422	473	13663	473	13505	473	13125	473	13538
474	13960	474	13131	474	13284	474	13200	474	13105	474	12976
475	13460	475	12884	475	13020	475	12972	475	12811	475	12860
476	13271	476	12595	476	12934	476	12838	476	12590	476	12535
477	13065	477	12504	477	12246	477	12421	477	12361	477	12273
478	12535	478	12173	478	12051	478	12384	478	12136	478	12082
479	12404	479	11913	479	12176	479	12124	479	11638	479	11861
480	12275	480	11683	480	11775	480	11809	480	11394	480	11751
481	12152	481	11562	481	11621	481	11325	481	11334	481	11148
482	11693	482	11157	482	11163	482	11225	482	10949	482	11059
483	11346	483	10627	483	10897	483	10882	483	10620	483	10815
484	11042	484	10631	484	10364	484	10604	484	10475	484	10489
485	10844	485	10349	485	10535	485	10392	485	10206	485	10334
486	10661	486	10360	486	10284	486	9982	486	9853	486	9979
487	10478	487	9815	487	10110	487	10051	487	9668	487	9825
488	10104	488	9654	488	9737	488	9659	488	9470	488	9621
489	9724	489	9551	489	9283	489	9369	489	9060	489	9345
490	9441	490	9282	490	9299	490	9113	490	8904	490	9110
491	9274	491	8774	491	8929	491	8904	491	8950	491	8862
492	9064	492	8581	492	8605	492	8683	492	8599	492	8493
493	8890	493	8302	493	8411	493	8498	493	8282	493	8071
494	8726	494	8190	494	8377	494	8219	494	8090	494	8096
495	8384	495	8011	495	8159	495	7938	495	7955	495	7803
496	8116	496	7738	496	7681	496	7874	496	7777	496	7731
497	7848	497	7524	497	7522	497	7610	497	7427	497	7497
498	7675	498	7284	498	7303	498	7238	498	7330	498	7183
499	7680	499	7062	499	7270	499	7070	499	7067	499	7116
500	7124	500	6970	500	6884	500	6956	500	6865	500	6809
501	6902	501	6594	501	6445	501	6523	501	6729	501	6772
502	6875	502	6456	502	6518	502	6487	502	6284	502	6413
503	6611	503	6306	503	6279	503	6196	503	6286	503	6158
504	6242	504	6141	504	6128	504	6125	504	6018	504	6111
505	6196	505	5780	505	5974	505	5900	505	5913	505	5843
506	5951	506	5746	506	5733	506	5866	506	5639	506	5755
507	5763	507	5484	507	5608	507	5556	507	5525	507	5483
508	5705	508	5323	508	5405	508	5420	508	5259	508	5443
509	5596	509	5240	509	5204	509	5203	509	5058	509	5202
510	5389	510	5111	510	5105	510	5019	510	4882	510	5056
511	5079	511	4829	511	4997	511	4838	511	4802	511	4873
512	4979	512	4665	512	4763	512	4960	512	4656	512	4655
513	4831	513	4568	513	4517	513	4602	513	4532	513	4741
514	4573	514	4505	514	4395	514	4310	514	4389	514	4595
515	4439	515	4558	515	4392	515	4259	515	4197	515	4361
516	4433	516	4218	516	3960	516	4139	516	4112	516	4136
517	4291	517	4024	517	3917	517	4028	517	4092	517	4015
518	4027	518	3993	518	3928	518	3927	518	3875	518	3892
519	3950	519	3791	519	3875	519	3722	519	3839	519	3819
520	3855	520	3621	520	3694	520	3556	520	3497	520	3580
521	3711	521	3483	521	3558	521	3532	521	3448	521	3419
522	3554	522	3399	522	3415	522	3477	522	3338	522	3349
523	3587	523	3195	523	3459	523	3326	523	3282	523	3374
524	3437	524	3209	524	3189	524	3125	524	3189	524	3121
525	3302	525	3154	525	3107	525	3141	525	3044	525	3036
526	3100	526	2994	526	3069	526	2969	526	2913	526	3030
527	3132	527	2899	527	2898	527	2919	527	2893	527	2989
528	2886	528	2918	528	2711	528	2854	528	2908	528	2889
529	2806	529	2631	529	2759	529	2743	529	2716	529	2614
530	2757	530	2526	530	2653	530	2578	530	2538	530	2654
531	2641	531	2602	531	2494	531	2649	531	2513	531	2523
532	2605	532	2377	532	2537	532	2375	532	2562	532	2420
533	2457	533	2315	533	2329	533	2343	533	2273	533	2329
534	2418	534	2277	534	2319	534	2304	534	2234	534	2240
535	2270	535	2220	535	2237	535	2123	535	2162	535	2171
536	2227	536	2061	536	2148	536	2117	536	2178	536	2140
537	2189	537	2003	537	2047	537	2058	537	2019	537	2009
538	2006	538	2020	538	2001	538	1984	538	2043	538	2014
539	1935	539	1844	539	1861	539	1901	539	1858	539	1950
540	1898	540	1845	540	1826	540	1791	540	1805	540	1883
541	1829	541	1740	541	1814	541	1793	541	1770	541	1791
542	1751	542	1715	542	1745	542	1718	542	1821	542	1783
543	1689	543	1706	543	1739	543	1647	543	1670	543	1587
544	1689	544	1630	544	1617	544	1671	544	1662	544	1621
545	1606	545	1601	545	1565	545	1583	545	1561	545	1563
546	1558	546	1486	546	1470	546	1454	546	1505	546	1515
547	1475	547	1465	547	1444	547	1402	547	1441	547	1393
548	1457	548	1393	548	1463	548	1418	548	1377	548	1356
549	1375	549	1318	549	1363	549	1401	549	1409	549	1353
550	1414	550	1299	550	1346	550	1282	550	1327	550	1279
551	1309	551	1234	551	1223	551	1217	551	1259	551	1268
552	1275	552	1254	552	1282	552	1206	552	1229	552	1202
553	1229	553	1186	553	1088	553	1157	553	1199	553	1146
554	1195	554	1108	554	1131	554	1142	554	1126	554	1081
555	1165	555	1102	555	1091	555	1061	555	1163	555	1074
556	1180	556	1054	556	1072	556	1060	556	1024	556	1079
557	1027	557	996	557	1033	557	1002	557	995	557	1004
558	1016	558	993	558	964	558	945	558	913	558	983
559	988	559	942	559	925	559	904	559	934	559	962
560	1008	560	862	560	902	560	906	560	922	560	934
561	877	561	884	561	899	561	925	561	912	561	879
562	862	562	846	562	866	562	894	562	807	562	872
563	857	563	878	563	834	563	836	563	820	563	798
564	833	564	798	564	754	564	808	564	744	564	818
565	826	565	761	565	770	565	826	565	842	565	745
566	769	566	789	566	734	566	764	566	780	566	773
567	758	567	692	567	691	567	763	567	713	567	757
568	675	568	703	568	731	568	721	568	732	568	688
569	727	569	701	569	702	569	699	569	701	569	752
570	676	570	671	570	630	570	695	570	696	570	694
571	678	571	629	571	609	571	625	571	611	571	665
572	668	572	617	572	608	572	629	572	612	572	615
573	638	573	624	573	643	573	597	573	610	573	648
574	577	574	546	574	541	574	579	574	581	574	559
575	571	575	536	575	576	575	592	575	547	575	587
576	566	576	527	576	558	576	584	576	526	576	570
577	534	577	538	577	575	577	544	577	506	577	545
578	536	578	499	578	516	578	527	578	571	578	523
579	518	579	418	579	473	579	514	579	491	579	493
580	476	580	487	580	473	580	478	580	492	580	457
581	514	581	436	581	478	581	455	581	463	581	489
582	492	582	434	582	480	582	492	582	492	582	429
583	441	583	473	583	461	583	396	583	422	583	501
584	451	584	401	584	417	584	423	584	380	584	423
585	400	585	423	585	440	585	387	585	416	585	399
586	413	586	385	586	392	586	412	586	395	586	418
587	412	587	364	587	403	587	440	587	396	587	405
588	382	588	376	588	415	588	392	588	361	588	383
589	361	589	363	589	414	589	345	589	362	589	361
590	389	590	327	590	360	590	357	590	382	590	341
591	347	591	342	591	315	591	355	591	356	591	354
592	359	592	356	592	312	592	343	592	358	592	331
593	353	593	339	593	317	593	308	593	319	593	327
594	352	594	332	594	329	594	333	594	315	594	345
595	321	595	291	595	304	595	315	595	317	595	278
596	302	596	306	596	286	596	290	596	288	596	292
597	264	597	302	597	290	597	274	597	274	597	317
598	289	598	277	598	271	598	268	598	278	598	283
599	284	599	285	599	268	599	292	599	272	599	288
600	270	600	272	600	264	600	279	600	256	600	262
601	239	601	280	601	252	601	232	601	258	601	254
602	260	602	284	602	240	602	259	602	255	602	249
603	266	603	233	603	223	603	244	603	259	603	247
604	240	604	237	604	234	604	234	604	238	604	252
605	250	605	253	605	219	605	240	605	211	605	244
606	233	606	256	606	209	606	244	606	234	606	218
607	231	607	227	607	198	607	220	607	223	607	230
608	227	608	197	608	197	608	196	608	198	608	176
609	243	609	205	609	222	609	224	609	193	609	187
610	202	610	216	610	187	610	215	610	193	610	223
611	199	611	187	611	189	611	192	611	196	611	192
612	174	612	209	612	166	612	190	612	167	612	158
613	180	613	183	613	196	613	195	613	174	613	177
614	166	614	194	614	195	614	159	614	166	614	190
615	189	615	184	615	154	615	170	615	171	615	183
616	184	616	154	616	162	616	186	616	160	616	190
617	177	617	151	617	159	617	171	617	181	617	172
618	144	618	157	618	164	618	152	618	157	618	164
619	157	619	146	619	162	619	176	619	153	619	152
620	167	620	126	620	132	620	154	620	175	620	143
621	165	621	145	621	137	621	143	621	145	621	143
622	150	622	142	622	163	622	152	622	140	622	155
623	150	623	151	623	134	623	132	623	127	623	147
624	129	624	140	624	136	624	129	624	147	624	156
625	137	625	136	625	103	625	120	625	142	625	147
626	107	626	144	626	148	626	130	626	142	626	126
627	140	627	142	627	125	627	129	627	125	627	133
628	142	628	127	628	134	628	132	628	143	628	109
629	125	629	126	629	133	629	112	629	106	629	115
630	122	630	114	630	130	630	122	630	117	630	118
631	100	631	107	631	114	631	118	631	114	631	119
632	106	632	132	632	117	632	97	632	113	632	128
633	99	633	130	633	107	633	122	633	118	633	107
634	105	634	114	634	113	634	96	634	86	634	116
635	106	635	113	635	107	635	112	635	111	635	99
636	101	636	112	636	116	636	97	636	102	636	97
637	101	637	100	637	101	637	101	637	104	637	118
638	114	638	96	638	87	638	95	638	111	638	115
639	102	639	102	639	98	639	81	639	100	639	97
640	110	640	91	640	97	640	96	640	98	640	86
641	106	641	105	641	99	641	109	641	93	641	89
642	105	642	87	642	110	642	84	642	99	642	93
643	86	643	74	643	90	643	95	643	102	643	111
644	79	644	99	644	103	644	75	644	92	644	101
645	88	645	87	645	80	645	82	645	96	645	79
646	98	646	100	646	92	646	91	646	93	646	90
647	84	647	74	647	83	647	69	647	82	647	97
648	83	648	91	648	95	648	80	648	85	648	88
649	95	649	81	649	85	649	97	649	88	649	61
650	99	650	80	650	80	650	73	650	75	650	81
651	93	651	61	651	90	651	72	651	74	651	71
652	75	652	75	652	72	652	68	652	72	652	69
653	69	653	64	653	75	653	81	653	67	653	67
654	74	654	91	654	69	654	86	654	94	654	94
655	99	655	75	655	77	655	78	655	78	655	72
656	67	656	87	656	88	656	55	656	70	656	86
657	83	657	68	657	57	657	57	657	62	657	66
658	68	658	68	658	73	658	64	658	73	658	71
659	72	659	75	659	82	659	74	659	67	659	88
660	74	660	68	660	86	660	72	660	66	660	58
661	71	661	72	661	71	661	65	661	66	661	76
662	77	662	74	662	73	662	57	662	65	662	62
663	65	663	83	663	64	663	80	663	85	663	81
664	70	664	68	664	73	664	63	664	57	664	72
665	57	665	79	665	64	665	73	665	54	665	70
666	69	666	60	666	59	666	75	666	75	666	54
667	80	667	64	667	69	667	62	667	63	667	54
668	67	668	58	668	77	668	49	668	57	668	66
669	67	669	78	669	56	669	58	669	57	669	55
670	51	670	60	670	61	670	67	670	65	670	66
671	57	671	55	671	54	671	65	671	65	671	55
672	61	672	62	672	57	672	67	672	47	672	55
673	67	673	54	673	46	673	60	673	61	673	53
674	63	674	53	674	62	674	57	674	57	674	63
675	57	675	69	675	61	675	62	675	57	675	57
676	51	676	50	676	62	676	56	676	57	676	53
677	69	677	59	677	52	677	59	677	48	677	50
678	64	678	54	678	57	678	52	678	43	678	40
679	54	679	41	679	53	679	67	679	41	679	59
680	52	680	52	680	44	680	52	680	45	680	54
