# Supplementary material for: In-depth chiral sensing capability of C-dots in a biomimetic protein-based hydrogel: a probe for chiral recognition applications
Source: Royal Society of Chemistry journal article supplement (doi:10.1039/d5bm01508a), 2026-01-01
Supplement: d5bm01508a1.zip [file Figure S17.xlsx]

## Sheet: Figure S17(a)
365	36	365	39	365	41	365	43	365	40	365	43
366	42	366	42	366	39	366	40	366	33	366	36
367	34	367	45	367	37	367	40	367	41	367	36
368	41	368	36	368	41	368	38	368	45	368	37
369	45	369	45	369	41	369	43	369	47	369	40
370	48	370	30	370	43	370	33	370	55	370	52
371	44	371	34	371	37	371	40	371	43	371	42
372	46	372	43	372	45	372	44	372	33	372	48
373	40	373	47	373	40	373	55	373	34	373	51
374	40	374	38	374	48	374	49	374	48	374	41
375	37	375	36	375	45	375	57	375	47	375	50
376	47	376	45	376	35	376	36	376	45	376	54
377	40	377	52	377	59	377	50	377	50	377	45
378	45	378	55	378	55	378	43	378	46	378	37
379	49	379	53	379	43	379	54	379	31	379	39
380	57	380	59	380	56	380	54	380	45	380	51
381	51	381	47	381	46	381	55	381	48	381	61
382	70	382	50	382	43	382	46	382	53	382	48
383	66	383	63	383	63	383	49	383	53	383	56
384	57	384	65	384	52	384	60	384	67	384	46
385	69	385	75	385	60	385	62	385	60	385	56
386	60	386	66	386	83	386	74	386	71	386	64
387	91	387	78	387	102	387	83	387	81	387	79
388	86	388	85	388	105	388	107	388	77	388	98
389	81	389	117	389	114	389	106	389	122	389	98
390	130	390	141	390	113	390	127	390	139	390	126
391	166	391	163	391	171	391	150	391	143	391	157
392	166	392	164	392	195	392	196	392	174	392	211
393	228	393	244	393	237	393	239	393	225	393	218
394	300	394	306	394	287	394	286	394	293	394	300
395	355	395	371	395	354	395	357	395	358	395	358
396	458	396	468	396	459	396	458	396	460	396	397
397	563	397	524	397	525	397	544	397	544	397	560
398	707	398	685	398	675	398	669	398	619	398	646
399	814	399	845	399	857	399	858	399	821	399	837
400	1039	400	1070	400	973	400	979	400	998	400	972
401	1300	401	1159	401	1165	401	1158	401	1192	401	1180
402	1498	402	1418	402	1453	402	1388	402	1412	402	1458
403	1677	403	1626	403	1630	403	1636	403	1632	403	1584
404	1887	404	1938	404	1931	404	1914	404	1880	404	1925
405	2354	405	2268	405	2316	405	2249	405	2287	405	2173
406	2722	406	2561	406	2617	406	2581	406	2561	406	2597
407	2938	407	2954	407	2941	407	2907	407	2841	407	2885
408	3281	408	3288	408	3257	408	3264	408	3274	408	3202
409	3611	409	3655	409	3559	409	3554	409	3555	409	3610
410	4048	410	4102	410	3900	410	4082	410	3938	410	3856
411	4320	411	4378	411	4388	411	4304	411	4277	411	4355
412	4813	412	4799	412	4696	412	4750	412	4813	412	4560
413	5162	413	5228	413	5251	413	5028	413	5088	413	5017
414	5517	414	5539	414	5386	414	5359	414	5439	414	5423
415	6034	415	5933	415	5846	415	5840	415	5886	415	5886
416	6277	416	6413	416	6262	416	6117	416	6151	416	6077
417	6775	417	6641	417	6562	417	6538	417	6409	417	6492
418	7094	418	6949	418	6909	418	6997	418	6819	418	6854
419	7426	419	7442	419	7426	419	7154	419	7354	419	7150
420	7801	420	7563	420	7755	420	7799	420	7476	420	7529
421	8056	421	8065	421	7818	421	8018	421	7935	421	7942
422	8475	422	8392	422	8440	422	8454	422	8179	422	8292
423	8890	423	8541	423	8687	423	8606	423	8426	423	8610
424	9114	424	9010	424	9079	424	9009	424	9058	424	8887
425	9583	425	9372	425	9286	425	9313	425	9326	425	9106
426	9740	426	9854	426	9448	426	9712	426	9542	426	9364
427	10098	427	10121	427	9960	427	9543	427	9617	427	9742
428	10313	428	10294	428	10119	428	10082	428	10052	428	9978
429	10632	429	10695	429	10363	429	10313	429	10398	429	10240
430	10798	430	11038	430	10840	430	10721	430	10678	430	10537
431	11027	431	11188	431	11042	431	10960	431	10988	431	10694
432	11347	432	11324	432	11154	432	11093	432	10935	432	11090
433	11609	433	11409	433	11448	433	11264	433	11267	433	11297
434	11935	434	11701	434	11665	434	11630	434	11410	434	11594
435	11908	435	11949	435	11868	435	11936	435	11832	435	11491
436	12158	436	12149	436	11980	436	11952	436	11940	436	11834
437	12333	437	12538	437	12409	437	12104	437	12346	437	12225
438	12868	438	12405	438	12421	438	12546	438	12483	438	12293
439	12768	439	12619	439	12582	439	12419	439	12551	439	12390
440	12840	440	12585	440	12867	440	12605	440	12453	440	12363
441	12913	441	12969	441	12845	441	12897	441	12802	441	12619
442	13013	442	12926	442	12951	442	13084	442	12907	442	13018
443	13272	443	13250	443	13112	443	13063	443	12870	443	12763
444	13344	444	13213	444	13144	444	13031	444	13191	444	13057
445	13489	445	13391	445	13417	445	13118	445	13291	445	13209
446	13307	446	13483	446	13397	446	13276	446	13432	446	13119
447	13657	447	13393	447	13194	447	13114	447	13213	447	13264
448	13489	448	13452	448	13265	448	13363	448	13151	448	13343
449	13476	449	13695	449	13343	449	13523	449	13208	449	13464
450	13376	450	13179	450	13474	450	13313	450	13434	450	13281
451	13448	451	13586	451	13443	451	13406	451	13200	451	13378
452	13457	452	13419	452	13444	452	13260	452	13467	452	13234
453	13726	453	13389	453	13469	453	13186	453	13362	453	13185
454	13462	454	13274	454	13335	454	13227	454	13211	454	13211
455	13613	455	13232	455	13241	455	13087	455	13163	455	13064
456	13186	456	13412	456	13194	456	13178	456	13263	456	13163
457	13262	457	13173	457	13192	457	12911	457	13183	457	12860
458	13344	458	13093	458	12826	458	12792	458	13078	458	12832
459	13071	459	13071	459	13151	459	12802	459	12711	459	12669
460	12992	460	12815	460	12810	460	12799	460	12615	460	12669
461	12650	461	12828	461	12565	461	12588	461	12798	461	12211
462	12476	462	12494	462	12542	462	12635	462	12468	462	12566
463	12398	463	12422	463	12140	463	12537	463	12383	463	12230
464	12379	464	12457	464	12137	464	12219	464	12009	464	12136
465	12209	465	12143	465	11977	465	12216	465	12107	465	11891
466	12073	466	11982	466	11646	466	11975	466	11826	466	11785
467	12045	467	11911	467	11757	467	11784	467	11662	467	11806
468	11701	468	11836	468	11559	468	11498	468	11585	468	11513
469	11597	469	11413	469	11288	469	11415	469	11433	469	11187
470	11131	470	11221	470	11192	470	11177	470	11180	470	11040
471	11129	471	11214	471	11241	471	10847	471	10911	471	11042
472	10900	472	10870	472	10741	472	10657	472	10593	472	10697
473	10893	473	10575	473	10547	473	10545	473	10492	473	10486
474	10452	474	10461	474	10410	474	10389	474	10522	474	10212
475	10270	475	10293	475	10296	475	10307	475	10311	475	10130
476	10037	476	10097	476	10158	476	10025	476	9945	476	9896
477	9917	477	9836	477	9999	477	9945	477	10032	477	9698
478	9872	478	9852	478	9786	478	9685	478	9526	478	9707
479	9702	479	9507	479	9676	479	9462	479	9443	479	9292
480	9402	480	9437	480	9376	480	9263	480	9336	480	9149
481	9201	481	9110	481	9196	481	9162	481	9040	481	9033
482	9165	482	9034	482	9132	482	9057	482	8950	482	8861
483	8953	483	8842	483	8694	483	8769	483	8652	483	8643
484	8603	484	8624	484	8564	484	8564	484	8440	484	8508
485	8495	485	8426	485	8285	485	8364	485	8362	485	8361
486	8327	486	8166	486	8336	486	8161	486	8169	486	8205
487	8124	487	8007	487	8017	487	8206	487	8017	487	7904
488	7869	488	7916	488	7867	488	7765	488	7829	488	7756
489	7763	489	7760	489	7697	489	7594	489	7505	489	7657
490	7712	490	7507	490	7407	490	7389	490	7226	490	7255
491	7275	491	7291	491	7111	491	7240	491	7133	491	7238
492	7113	492	7031	492	7191	492	6876	492	7024	492	7052
493	6949	493	6980	493	7011	493	6893	493	6899	493	7099
494	6701	494	6890	494	6811	494	6716	494	6585	494	6473
495	6688	495	6532	495	6599	495	6384	495	6371	495	6430
496	6487	496	6494	496	6465	496	6371	496	6429	496	6260
497	6426	497	6227	497	6183	497	6262	497	6054	497	6127
498	6044	498	6219	498	6032	498	6070	498	6095	498	5915
499	5976	499	6075	499	5830	499	5923	499	5839	499	5816
500	5657	500	5893	500	5590	500	5667	500	5721	500	5685
501	5676	501	5372	501	5541	501	5543	501	5508	501	5448
502	5415	502	5452	502	5473	502	5429	502	5502	502	5375
503	5380	503	5208	503	5189	503	5191	503	5180	503	5235
504	5147	504	5164	504	4986	504	5083	504	5082	504	5160
505	4988	505	4951	505	4923	505	4919	505	4869	505	4958
506	4853	506	5020	506	4861	506	4768	506	4730	506	4796
507	4764	507	4732	507	4588	507	4698	507	4672	507	4686
508	4772	508	4497	508	4455	508	4536	508	4506	508	4506
509	4528	509	4580	509	4521	509	4299	509	4431	509	4412
510	4500	510	4319	510	4200	510	4370	510	4259	510	4216
511	4170	511	4164	511	4301	511	4053	511	4230	511	4160
512	4072	512	4003	512	4026	512	4149	512	3885	512	3899
513	3853	513	3925	513	4005	513	3979	513	3978	513	3925
514	3663	514	3795	514	3782	514	3757	514	3700	514	3809
515	3659	515	3794	515	3688	515	3715	515	3707	515	3671
516	3575	516	3554	516	3609	516	3481	516	3615	516	3567
517	3541	517	3457	517	3438	517	3448	517	3518	517	3530
518	3361	518	3375	518	3429	518	3314	518	3360	518	3370
519	3422	519	3272	519	3308	519	3199	519	3193	519	3258
520	3178	520	3247	520	3174	520	3220	520	3164	520	3148
521	3140	521	3140	521	3043	521	3166	521	3026	521	2968
522	3047	522	2947	522	2921	522	2910	522	2895	522	2904
523	2862	523	2812	523	2907	523	2854	523	2811	523	2924
524	2826	524	2796	524	2830	524	2827	524	2689	524	2724
525	2717	525	2662	525	2764	525	2651	525	2760	525	2758
526	2538	526	2654	526	2595	526	2549	526	2632	526	2592
527	2518	527	2641	527	2514	527	2600	527	2546	527	2533
528	2510	528	2423	528	2519	528	2466	528	2393	528	2345
529	2347	529	2359	529	2401	529	2454	529	2371	529	2347
530	2328	530	2207	530	2281	530	2338	530	2241	530	2339
531	2290	531	2321	531	2200	531	2214	531	2218	531	2243
532	2196	532	2136	532	2190	532	2093	532	2129	532	2135
533	2085	533	2084	533	2095	533	2110	533	2058	533	2148
534	2025	534	2005	534	1930	534	1958	534	1979	534	1958
535	1967	535	1978	535	1995	535	1940	535	1947	535	1948
536	1941	536	1950	536	1818	536	1860	536	1806	536	1879
537	1788	537	1820	537	1744	537	1879	537	1780	537	1861
538	1732	538	1736	538	1745	538	1717	538	1723	538	1772
539	1745	539	1712	539	1733	539	1741	539	1669	539	1529
540	1696	540	1707	540	1623	540	1715	540	1668	540	1622
541	1605	541	1702	541	1541	541	1569	541	1590	541	1489
542	1609	542	1578	542	1610	542	1472	542	1525	542	1557
543	1526	543	1469	543	1629	543	1426	543	1523	543	1563
544	1458	544	1465	544	1494	544	1439	544	1450	544	1471
545	1399	545	1343	545	1350	545	1325	545	1385	545	1407
546	1341	546	1325	546	1316	546	1288	546	1344	546	1331
547	1328	547	1349	547	1362	547	1334	547	1333	547	1336
548	1278	548	1324	548	1182	548	1290	548	1221	548	1266
549	1131	549	1297	549	1225	549	1209	549	1192	549	1183
550	1188	550	1201	550	1184	550	1220	550	1160	550	1157
551	1097	551	1099	551	1164	551	1129	551	1088	551	1179
552	1091	552	1104	552	1115	552	1098	552	1094	552	1039
553	1111	553	1038	553	1068	553	1050	553	1104	553	1114
554	980	554	1087	554	1055	554	1109	554	1020	554	1051
555	957	555	1018	555	1007	555	1014	555	936	555	968
556	995	556	994	556	966	556	957	556	954	556	953
557	961	557	993	557	960	557	911	557	947	557	931
558	888	558	951	558	865	558	938	558	857	558	906
559	876	559	930	559	835	559	862	559	874	559	936
560	836	560	888	560	866	560	868	560	771	560	875
561	834	561	810	561	836	561	790	561	800	561	816
562	830	562	806	562	789	562	784	562	798	562	787
563	807	563	756	563	744	563	793	563	777	563	754
564	809	564	758	564	799	564	756	564	785	564	719
565	740	565	711	565	708	565	757	565	666	565	727
566	740	566	716	566	707	566	682	566	683	566	684
567	653	567	678	567	666	567	639	567	651	567	685
568	665	568	720	568	679	568	672	568	608	568	655
569	629	569	597	569	653	569	617	569	622	569	650
570	668	570	607	570	616	570	611	570	605	570	601
571	590	571	546	571	625	571	603	571	603	571	558
572	589	572	587	572	594	572	582	572	577	572	592
573	580	573	591	573	555	573	570	573	554	573	582
574	512	574	547	574	572	574	510	574	565	574	531
575	553	575	543	575	507	575	561	575	514	575	532
576	540	576	512	576	512	576	497	576	502	576	505
577	511	577	489	577	530	577	543	577	483	577	501
578	469	578	465	578	494	578	487	578	480	578	477
579	468	579	514	579	464	579	453	579	456	579	484
580	463	580	482	580	478	580	432	580	464	580	470
581	419	581	401	581	446	581	472	581	461	581	391
582	439	582	468	582	408	582	431	582	428	582	431
583	402	583	429	583	365	583	379	583	413	583	415
584	394	584	358	584	388	584	408	584	377	584	414
585	406	585	361	585	386	585	384	585	379	585	394
586	377	586	370	586	373	586	403	586	371	586	366
587	395	587	391	587	332	587	377	587	375	587	370
588	367	588	386	588	344	588	370	588	360	588	357
589	356	589	350	589	375	589	339	589	341	589	338
590	342	590	355	590	294	590	339	590	325	590	335
591	346	591	338	591	316	591	291	591	291	591	322
592	319	592	324	592	321	592	317	592	325	592	320
593	316	593	295	593	307	593	307	593	307	593	331
594	294	594	303	594	302	594	307	594	294	594	314
595	311	595	269	595	303	595	309	595	305	595	270
596	302	596	280	596	287	596	289	596	293	596	245
597	273	597	249	597	264	597	254	597	262	597	268
598	269	598	260	598	233	598	259	598	236	598	271
599	249	599	256	599	258	599	250	599	268	599	281
600	242	600	249	600	267	600	276	600	237	600	250
601	269	601	239	601	261	601	233	601	236	601	225
602	250	602	243	602	220	602	235	602	276	602	224
603	232	603	236	603	254	603	221	603	237	603	261
604	226	604	253	604	231	604	195	604	198	604	243
605	241	605	206	605	259	605	214	605	221	605	218
606	214	606	235	606	219	606	195	606	250	606	197
607	224	607	200	607	225	607	182	607	205	607	200
608	192	608	214	608	227	608	203	608	220	608	193
609	233	609	203	609	194	609	190	609	202	609	195
610	184	610	189	610	204	610	181	610	194	610	195
611	191	611	196	611	157	611	204	611	177	611	180
612	215	612	197	612	200	612	184	612	188	612	159
613	211	613	152	613	175	613	199	613	181	613	164
614	202	614	177	614	182	614	181	614	139	614	164
615	167	615	169	615	174	615	180	615	159	615	181
616	147	616	147	616	159	616	185	616	171	616	148
617	161	617	163	617	162	617	148	617	151	617	153
618	143	618	146	618	166	618	143	618	160	618	138
619	163	619	140	619	170	619	157	619	150	619	150
620	156	620	167	620	156	620	145	620	148	620	127
621	128	621	147	621	140	621	158	621	145	621	149
622	146	622	141	622	130	622	129	622	141	622	147
623	150	623	159	623	148	623	142	623	129	623	126
624	119	624	139	624	116	624	136	624	113	624	126
625	152	625	136	625	141	625	131	625	122	625	136
626	135	626	131	626	135	626	138	626	131	626	134
627	119	627	131	627	125	627	117	627	139	627	115
628	138	628	120	628	103	628	119	628	129	628	124
629	112	629	113	629	122	629	131	629	114	629	124
630	122	630	124	630	124	630	98	630	115	630	113
631	99	631	109	631	86	631	114	631	127	631	124
632	91	632	102	632	131	632	121	632	88	632	91
633	119	633	103	633	114	633	111	633	114	633	107
634	124	634	119	634	119	634	99	634	96	634	97
635	105	635	111	635	108	635	94	635	121	635	102
636	114	636	103	636	99	636	100	636	111	636	87
637	91	637	111	637	111	637	107	637	108	637	116
638	80	638	100	638	80	638	86	638	99	638	90
639	99	639	107	639	66	639	92	639	89	639	86
640	110	640	98	640	100	640	85	640	81	640	82
641	92	641	106	641	100	641	85	641	101	641	69
642	95	642	82	642	73	642	84	642	80	642	85
643	79	643	84	643	79	643	103	643	102	643	76
644	85	644	85	644	66	644	78	644	93	644	98
645	88	645	84	645	99	645	65	645	99	645	65
646	90	646	87	646	83	646	101	646	69	646	86
647	94	647	82	647	88	647	74	647	78	647	80
648	79	648	84	648	81	648	74	648	79	648	98
649	102	649	78	649	83	649	84	649	71	649	68
650	71	650	88	650	80	650	65	650	75	650	80
651	90	651	83	651	73	651	72	651	63	651	70
652	76	652	75	652	78	652	63	652	88	652	76
653	82	653	61	653	63	653	86	653	65	653	66
654	78	654	70	654	72	654	80	654	75	654	91
655	63	655	55	655	73	655	86	655	66	655	67
656	60	656	63	656	72	656	67	656	82	656	57
657	70	657	80	657	77	657	74	657	63	657	55
658	81	658	83	658	70	658	76	658	71	658	64
659	64	659	57	659	65	659	67	659	70	659	61
660	65	660	62	660	73	660	63	660	74	660	71
661	56	661	77	661	76	661	41	661	77	661	65
662	64	662	70	662	64	662	66	662	51	662	57
663	60	663	56	663	67	663	59	663	68	663	71
664	69	664	54	664	68	664	65	664	55	664	65
665	53	665	62	665	66	665	63	665	70	665	59
666	56	666	60	666	58	666	58	666	41	666	54
667	56	667	60	667	55	667	50	667	56	667	61
668	58	668	60	668	65	668	52	668	62	668	69
669	52	669	63	669	47	669	65	669	50	669	42
670	49	670	57	670	47	670	51	670	60	670	59
671	59	671	52	671	56	671	59	671	58	671	66
672	60	672	48	672	68	672	51	672	52	672	46
673	60	673	53	673	61	673	60	673	60	673	40
674	43	674	44	674	75	674	64	674	67	674	58
675	43	675	63	675	58	675	58	675	54	675	47
676	50	676	42	676	67	676	58	676	62	676	69
677	53	677	72	677	51	677	50	677	44	677	39
678	62	678	56	678	55	678	72	678	42	678	48
679	59	679	56	679	51	679	49	679	46	679	53
680	56	680	53	680	61	680	38	680	47	680	52

## Sheet: Figure S17(b)
365	36	365	30	365	46	365	47	365	39	365	36
366	24	366	40	366	36	366	39	366	34	366	46
367	51	367	34	367	36	367	47	367	46	367	42
368	42	368	34	368	42	368	27	368	40	368	42
369	42	369	36	369	42	369	39	369	36	369	40
370	35	370	47	370	49	370	40	370	32	370	46
371	44	371	41	371	37	371	45	371	51	371	42
372	54	372	39	372	45	372	37	372	39	372	46
373	49	373	37	373	51	373	46	373	42	373	50
374	36	374	42	374	50	374	44	374	49	374	46
375	46	375	50	375	46	375	55	375	43	375	31
376	42	376	43	376	41	376	45	376	43	376	43
377	40	377	37	377	48	377	36	377	44	377	47
378	44	378	38	378	55	378	52	378	43	378	65
379	49	379	46	379	39	379	42	379	42	379	48
380	53	380	44	380	57	380	47	380	47	380	54
381	64	381	46	381	53	381	53	381	48	381	62
382	41	382	64	382	63	382	45	382	46	382	51
383	71	383	52	383	52	383	55	383	52	383	32
384	77	384	62	384	62	384	54	384	67	384	61
385	68	385	52	385	53	385	51	385	52	385	79
386	72	386	68	386	60	386	68	386	63	386	72
387	95	387	69	387	72	387	76	387	81	387	83
388	99	388	98	388	99	388	91	388	87	388	108
389	105	389	109	389	107	389	90	389	101	389	94
390	119	390	130	390	128	390	122	390	108	390	123
391	135	391	145	391	144	391	159	391	152	391	126
392	166	392	149	392	188	392	180	392	185	392	173
393	203	393	245	393	213	393	211	393	202	393	214
394	301	394	291	394	285	394	283	394	270	394	262
395	333	395	365	395	356	395	299	395	310	395	311
396	465	396	450	396	420	396	425	396	426	396	398
397	548	397	533	397	550	397	548	397	495	397	508
398	711	398	670	398	663	398	616	398	637	398	640
399	788	399	821	399	766	399	817	399	770	399	738
400	1017	400	958	400	976	400	964	400	945	400	944
401	1169	401	1200	401	1234	401	1125	401	1099	401	1111
402	1429	402	1446	402	1400	402	1457	402	1343	402	1338
403	1639	403	1610	403	1583	403	1690	403	1587	403	1621
404	1883	404	1841	404	1970	404	1913	404	1873	404	1898
405	2197	405	2246	405	2237	405	2172	405	2087	405	2138
406	2533	406	2469	406	2553	406	2334	406	2430	406	2453
407	2799	407	2845	407	2900	407	2694	407	2803	407	2772
408	3154	408	3195	408	3233	408	3114	408	3073	408	3191
409	3533	409	3509	409	3508	409	3490	409	3365	409	3416
410	3960	410	3943	410	3898	410	3902	410	3908	410	3777
411	4351	411	4294	411	4351	411	4138	411	4177	411	4093
412	4714	412	4697	412	4717	412	4477	412	4464	412	4480
413	5030	413	4945	413	5152	413	4918	413	4893	413	4902
414	5331	414	5402	414	5383	414	5091	414	5293	414	5166
415	5750	415	5648	415	5672	415	5700	415	5758	415	5591
416	6274	416	6258	416	6268	416	6055	416	5872	416	6109
417	6623	417	6506	417	6422	417	6364	417	6362	417	6420
418	6864	418	6841	418	6791	418	6761	418	6675	418	6692
419	7288	419	7249	419	7310	419	7056	419	7024	419	6871
420	7660	420	7638	420	7628	420	7299	420	7598	420	7626
421	7936	421	7888	421	8044	421	7674	421	7733	421	7767
422	8259	422	8190	422	8321	422	7993	422	8102	422	8221
423	8307	423	8474	423	8519	423	8463	423	8408	423	8279
424	8901	424	8926	424	8882	424	8631	424	8895	424	8645
425	9191	425	9045	425	9114	425	8981	425	8922	425	9163
426	9643	426	9533	426	9509	426	9328	426	9270	426	9381
427	9775	427	9731	427	9637	427	9405	427	9601	427	9507
428	10031	428	10040	428	10203	428	10244	428	9988	428	10006
429	10291	429	9949	429	10339	429	10046	429	10188	429	10022
430	10492	430	10384	430	10609	430	10510	430	10464	430	10415
431	10925	431	10866	431	10925	431	10627	431	10576	431	10684
432	10940	432	11078	432	11081	432	10952	432	10851	432	10718
433	11219	433	11311	433	11388	433	11063	433	11207	433	11322
434	11530	434	11401	434	11608	434	11442	434	11311	434	11204
435	11700	435	11830	435	11923	435	11333	435	11325	435	11553
436	11895	436	11971	436	11950	436	11604	436	11673	436	11754
437	12210	437	11971	437	12189	437	11895	437	11846	437	11914
438	12279	438	12192	438	12215	438	12094	438	12122	438	12069
439	12520	439	12451	439	12601	439	12288	439	12244	439	12250
440	12723	440	12383	440	12546	440	12575	440	12531	440	12516
441	12685	441	12688	441	13007	441	12594	441	12451	441	12581
442	12838	442	12748	442	12756	442	12717	442	12476	442	12893
443	12933	443	12810	443	12956	443	12955	443	12704	443	12640
444	13183	444	12930	444	12891	444	12970	444	12950	444	12797
445	13231	445	12798	445	13081	445	13069	445	13085	445	12803
446	13205	446	12955	446	13104	446	13004	446	12928	446	13027
447	13269	447	13176	447	13240	447	13202	447	13099	447	12970
448	13306	448	12929	448	13452	448	13173	448	12911	448	13106
449	13323	449	13303	449	13350	449	13160	449	13354	449	13146
450	13351	450	13250	450	13252	450	12976	450	13126	450	13439
451	13034	451	13307	451	13157	451	12874	451	13049	451	13047
452	13107	452	13154	452	13173	452	13186	452	13034	452	13179
453	13045	453	13086	453	13203	453	13108	453	12902	453	12969
454	12920	454	13294	454	13137	454	13081	454	12922	454	12971
455	12908	455	13206	455	13003	455	12938	455	12586	455	13042
456	12960	456	12988	456	13064	456	12640	456	12868	456	12927
457	12923	457	12990	457	13242	457	12773	457	12850	457	12650
458	12718	458	12740	458	12788	458	12614	458	12787	458	12795
459	12582	459	12538	459	12582	459	12525	459	12566	459	12529
460	12369	460	12485	460	12561	460	12647	460	12316	460	12489
461	12410	461	12452	461	12476	461	12366	461	12383	461	12203
462	12265	462	12594	462	12293	462	12275	462	12030	462	12481
463	12275	463	12122	463	12093	463	12180	463	12024	463	12112
464	12019	464	12058	464	12021	464	11996	464	11995	464	12029
465	12003	465	11865	465	12166	465	11982	465	11910	465	11751
466	11752	466	11644	466	11770	466	11605	466	11742	466	11821
467	11693	467	11437	467	11121	467	11809	467	11628	467	11337
468	11548	468	11440	468	11559	468	11396	468	11307	468	11576
469	11343	469	11032	469	11433	469	11149	469	11200	469	11309
470	10860	470	11005	470	11197	470	10987	470	11132	470	10709
471	10847	471	10864	471	10839	471	10847	471	10883	471	10843
472	10510	472	10694	472	10827	472	10597	472	10644	472	10877
473	10480	473	10494	473	10491	473	10570	473	10399	473	10365
474	10276	474	10381	474	10536	474	10256	474	10284	474	10251
475	10199	475	10245	475	10237	475	10034	475	10195	475	10099
476	9928	476	9995	476	9828	476	9909	476	9738	476	9868
477	9714	477	9547	477	9892	477	9559	477	9624	477	9598
478	9452	478	9486	478	9468	478	9587	478	9350	478	9352
479	9317	479	9272	479	9297	479	9555	479	9173	479	9233
480	9221	480	9196	480	9416	480	9250	480	9036	480	9029
481	9282	481	9032	481	9003	481	9066	481	8886	481	9064
482	8958	482	9001	482	8734	482	8762	482	8774	482	8635
483	8619	483	8683	483	8609	483	8674	483	8562	483	8503
484	8393	484	8537	484	8460	484	8332	484	8389	484	8274
485	8221	485	8260	485	8184	485	8224	485	8287	485	8142
486	8035	486	7927	486	8153	486	8278	486	7993	486	8461
487	7884	487	7798	487	7926	487	7967	487	7818	487	7679
488	7628	488	7737	488	7642	488	7719	488	7811	488	7771
489	7597	489	7589	489	7598	489	7448	489	7345	489	7522
490	7365	490	7375	490	7436	490	7305	490	7246	490	7244
491	7146	491	7198	491	7286	491	7314	491	6997	491	7153
492	6936	492	7012	492	7042	492	6893	492	6904	492	6968
493	6817	493	6924	493	6836	493	6999	493	6703	493	6958
494	6654	494	6667	494	6630	494	6502	494	6772	494	6639
495	6617	495	6554	495	6527	495	6362	495	6413	495	6380
496	6327	496	6410	496	6307	496	6297	496	6466	496	6239
497	6179	497	6139	497	6125	497	6037	497	6109	497	6069
498	5950	498	5974	498	5945	498	5905	498	5791	498	5918
499	5767	499	5906	499	6032	499	5903	499	5760	499	5776
500	5744	500	5589	500	5759	500	5481	500	5558	500	5621
501	5350	501	5417	501	5502	501	5606	501	5425	501	5421
502	5276	502	5284	502	5293	502	5472	502	5313	502	5180
503	5181	503	5096	503	5218	503	5180	503	5049	503	5180
504	5109	504	5101	504	5076	504	4973	504	5128	504	4947
505	4891	505	4932	505	5003	505	4946	505	4801	505	4728
506	4780	506	4796	506	4800	506	4729	506	4770	506	4597
507	4616	507	4614	507	4502	507	4528	507	4608	507	4795
508	4460	508	4541	508	4615	508	4466	508	4537	508	4509
509	4382	509	4244	509	4343	509	4354	509	4308	509	4283
510	4289	510	4308	510	4180	510	4223	510	4155	510	4176
511	4228	511	4132	511	4056	511	4023	511	4169	511	4118
512	4014	512	4001	512	3924	512	4035	512	4014	512	3915
513	3879	513	3830	513	3822	513	3875	513	3976	513	3755
514	3875	514	3812	514	3741	514	3746	514	3825	514	3700
515	3550	515	3583	515	3663	515	3603	515	3611	515	3608
516	3586	516	3557	516	3492	516	3580	516	3448	516	3538
517	3403	517	3412	517	3523	517	3471	517	3438	517	3461
518	3299	518	3284	518	3282	518	3287	518	3247	518	3214
519	3297	519	3194	519	3236	519	3280	519	3170	519	3154
520	3036	520	3147	520	3152	520	3090	520	3074	520	3052
521	3056	521	2965	521	3049	521	3063	521	2983	521	2924
522	2939	522	2864	522	2953	522	3016	522	2839	522	2914
523	2857	523	2822	523	2783	523	2818	523	2898	523	2781
524	2713	524	2741	524	2777	524	2745	524	2743	524	2704
525	2658	525	2730	525	2617	525	2639	525	2719	525	2691
526	2608	526	2619	526	2568	526	2612	526	2644	526	2589
527	2504	527	2496	527	2517	527	2466	527	2530	527	2455
528	2475	528	2436	528	2412	528	2418	528	2392	528	2420
529	2371	529	2289	529	2404	529	2254	529	2344	529	2271
530	2272	530	2292	530	2279	530	2236	530	2284	530	2246
531	2171	531	2101	531	2247	531	2261	531	2062	531	2187
532	2136	532	2078	532	2069	532	2119	532	2105	532	2074
533	2047	533	2073	533	2069	533	2003	533	1979	533	2053
534	1918	534	2015	534	1955	534	2059	534	1925	534	1947
535	1948	535	1951	535	1962	535	1966	535	1862	535	1960
536	1830	536	1841	536	1854	536	1881	536	1876	536	1853
537	1781	537	1766	537	1801	537	1789	537	1763	537	1838
538	1716	538	1685	538	1782	538	1762	538	1753	538	1727
539	1686	539	1687	539	1671	539	1624	539	1657	539	1648
540	1657	540	1685	540	1624	540	1615	540	1636	540	1602
541	1588	541	1557	541	1596	541	1596	541	1610	541	1537
542	1508	542	1501	542	1526	542	1450	542	1525	542	1434
543	1347	543	1504	543	1503	543	1433	543	1417	543	1495
544	1354	544	1427	544	1487	544	1453	544	1401	544	1446
545	1351	545	1332	545	1319	545	1338	545	1421	545	1378
546	1327	546	1380	546	1345	546	1387	546	1344	546	1219
547	1299	547	1253	547	1263	547	1325	547	1271	547	1248
548	1307	548	1240	548	1201	548	1310	548	1197	548	1255
549	1206	549	1165	549	1169	549	1217	549	1154	549	1176
550	1170	550	1169	550	1222	550	1182	550	1199	550	1123
551	1165	551	1197	551	1173	551	1133	551	1057	551	1067
552	1032	552	1152	552	1051	552	1091	552	1155	552	1029
553	1069	553	1069	553	1070	553	1094	553	995	553	1068
554	1043	554	1022	554	1008	554	1003	554	1024	554	1002
555	1000	555	984	555	936	555	990	555	953	555	936
556	937	556	961	556	978	556	982	556	939	556	968
557	915	557	896	557	841	557	947	557	839	557	893
558	911	558	934	558	930	558	888	558	806	558	874
559	905	559	859	559	886	559	937	559	844	559	855
560	796	560	775	560	828	560	927	560	826	560	815
561	860	561	818	561	822	561	777	561	859	561	805
562	769	562	820	562	765	562	776	562	791	562	786
563	759	563	766	563	765	563	818	563	743	563	732
564	675	564	725	564	739	564	764	564	739	564	771
565	660	565	670	565	722	565	666	565	746	565	762
566	675	566	695	566	712	566	716	566	715	566	655
567	680	567	702	567	654	567	668	567	721	567	664
568	639	568	650	568	684	568	613	568	683	568	621
569	637	569	600	569	633	569	632	569	615	569	645
570	643	570	644	570	606	570	619	570	583	570	596
571	594	571	623	571	588	571	586	571	615	571	545
572	567	572	538	572	565	572	528	572	571	572	554
573	561	573	532	573	560	573	569	573	529	573	528
574	516	574	524	574	529	574	573	574	517	574	533
575	505	575	546	575	536	575	502	575	531	575	548
576	501	576	518	576	485	576	472	576	509	576	483
577	481	577	499	577	492	577	505	577	465	577	507
578	506	578	464	578	516	578	487	578	433	578	472
579	426	579	458	579	460	579	483	579	444	579	436
580	433	580	433	580	468	580	434	580	473	580	446
581	474	581	457	581	452	581	414	581	460	581	416
582	462	582	433	582	396	582	430	582	400	582	442
583	437	583	433	583	412	583	421	583	402	583	389
584	401	584	434	584	430	584	351	584	424	584	389
585	395	585	377	585	393	585	403	585	404	585	393
586	379	586	376	586	376	586	364	586	376	586	414
587	396	587	348	587	380	587	377	587	353	587	336
588	338	588	357	588	374	588	345	588	367	588	353
589	342	589	342	589	346	589	341	589	338	589	357
590	312	590	328	590	349	590	351	590	323	590	310
591	341	591	319	591	318	591	279	591	309	591	337
592	314	592	309	592	297	592	319	592	286	592	305
593	311	593	320	593	274	593	319	593	339	593	276
594	315	594	344	594	288	594	307	594	295	594	292
595	300	595	310	595	319	595	305	595	277	595	267
596	280	596	279	596	283	596	286	596	287	596	280
597	288	597	298	597	290	597	263	597	253	597	297
598	294	598	277	598	267	598	262	598	302	598	283
599	219	599	278	599	249	599	246	599	249	599	259
600	268	600	263	600	264	600	277	600	256	600	240
601	229	601	251	601	267	601	262	601	230	601	241
602	236	602	230	602	226	602	250	602	228	602	207
603	224	603	223	603	214	603	215	603	232	603	227
604	228	604	211	604	217	604	223	604	208	604	203
605	241	605	233	605	236	605	241	605	209	605	245
606	214	606	193	606	232	606	229	606	200	606	206
607	216	607	214	607	210	607	208	607	195	607	212
608	216	608	190	608	233	608	196	608	235	608	206
609	185	609	215	609	188	609	207	609	187	609	188
610	192	610	188	610	203	610	184	610	198	610	209
611	189	611	193	611	186	611	186	611	204	611	185
612	184	612	163	612	180	612	155	612	197	612	179
613	211	613	195	613	186	613	168	613	170	613	198
614	158	614	168	614	175	614	187	614	161	614	150
615	159	615	165	615	150	615	163	615	172	615	151
616	179	616	186	616	178	616	168	616	163	616	151
617	179	617	162	617	163	617	170	617	157	617	154
618	154	618	159	618	150	618	161	618	159	618	167
619	142	619	153	619	150	619	158	619	167	619	160
620	148	620	145	620	147	620	147	620	147	620	155
621	157	621	144	621	152	621	148	621	143	621	150
622	137	622	146	622	118	622	120	622	138	622	141
623	114	623	113	623	143	623	131	623	131	623	144
624	150	624	137	624	124	624	137	624	127	624	138
625	131	625	143	625	116	625	124	625	149	625	134
626	127	626	114	626	118	626	124	626	127	626	133
627	100	627	121	627	114	627	127	627	118	627	137
628	139	628	115	628	113	628	137	628	115	628	126
629	93	629	120	629	99	629	114	629	121	629	128
630	140	630	125	630	103	630	135	630	113	630	119
631	112	631	104	631	120	631	111	631	101	631	120
632	82	632	85	632	118	632	136	632	105	632	123
633	103	633	113	633	91	633	92	633	96	633	109
634	83	634	110	634	92	634	89	634	96	634	104
635	100	635	96	635	107	635	92	635	108	635	93
636	104	636	87	636	103	636	105	636	103	636	105
637	89	637	88	637	98	637	103	637	107	637	103
638	99	638	86	638	113	638	102	638	88	638	92
639	100	639	86	639	104	639	103	639	83	639	110
640	82	640	93	640	88	640	83	640	109	640	100
641	72	641	83	641	101	641	85	641	81	641	83
642	99	642	72	642	98	642	83	642	84	642	99
643	85	643	88	643	94	643	75	643	91	643	73
644	90	644	88	644	86	644	84	644	86	644	77
645	93	645	75	645	72	645	88	645	88	645	64
646	78	646	84	646	79	646	93	646	85	646	77
647	72	647	86	647	92	647	81	647	82	647	77
648	71	648	72	648	81	648	69	648	65	648	92
649	69	649	63	649	91	649	80	649	76	649	65
650	78	650	73	650	80	650	79	650	88	650	75
651	77	651	75	651	97	651	81	651	86	651	84
652	75	652	82	652	64	652	76	652	77	652	87
653	74	653	90	653	72	653	77	653	75	653	77
654	68	654	76	654	74	654	73	654	70	654	57
655	69	655	72	655	85	655	75	655	68	655	60
656	66	656	59	656	65	656	61	656	70	656	95
657	67	657	73	657	70	657	69	657	56	657	78
658	56	658	65	658	71	658	65	658	72	658	80
659	60	659	72	659	71	659	62	659	65	659	70
660	67	660	65	660	74	660	75	660	61	660	72
661	67	661	75	661	80	661	61	661	65	661	69
662	67	662	55	662	61	662	73	662	52	662	67
663	60	663	78	663	63	663	67	663	72	663	62
664	54	664	53	664	58	664	60	664	86	664	66
665	55	665	61	665	55	665	69	665	62	665	77
666	64	666	65	666	58	666	65	666	51	666	62
667	45	667	57	667	65	667	84	667	67	667	59
668	60	668	48	668	65	668	60	668	58	668	57
669	60	669	52	669	60	669	52	669	51	669	60
670	45	670	61	670	38	670	46	670	69	670	60
671	61	671	52	671	69	671	66	671	53	671	51
672	58	672	56	672	56	672	49	672	64	672	54
673	53	673	58	673	47	673	60	673	49	673	63
674	46	674	60	674	62	674	59	674	56	674	69
675	58	675	63	675	64	675	48	675	50	675	68
676	44	676	52	676	50	676	62	676	42	676	57
677	49	677	51	677	53	677	45	677	55	677	61
678	50	678	58	678	60	678	48	678	46	678	44
679	40	679	60	679	57	679	58	679	58	679	60
680	45	680	53	680	53	680	57	680	52	680	50
